# Supplementary material for: Machine Learning Application for Medicinal Chemistry: Colchicine Case, New Structures, and Anticancer Activity Prediction
Source: MDPI journal article supplement (doi:10.3390/ph17020173), 2024-01-29
Supplement: s1 [file s1]

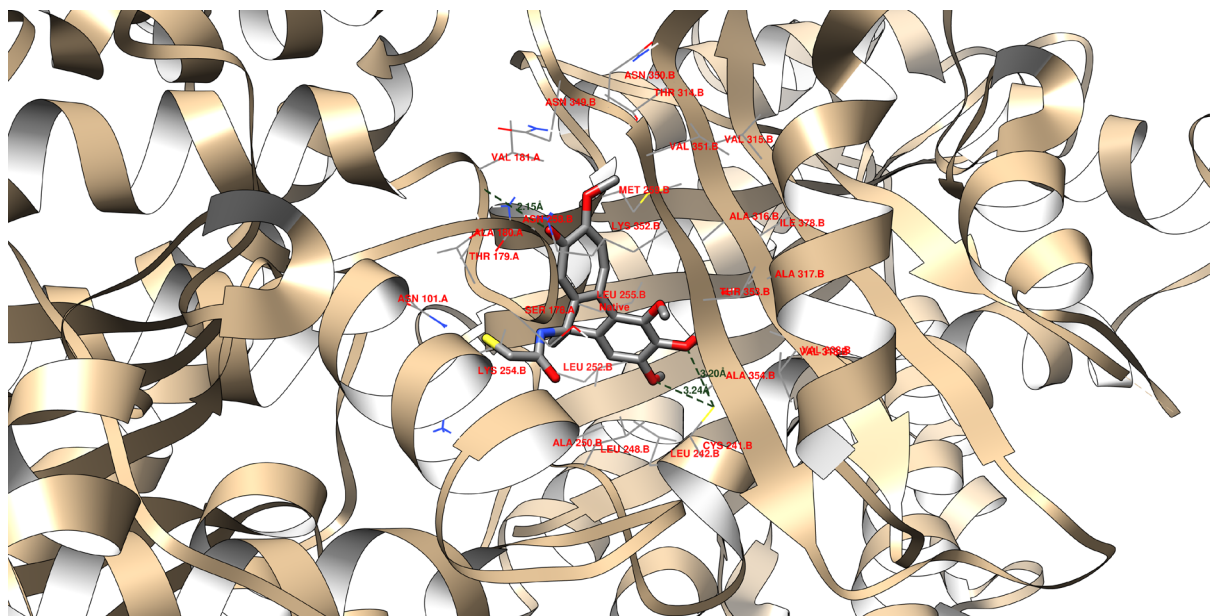

**Figure S1.** A native ligand from 1SA0 protein domain redocked to the 1SA0 protein domain – potential interactions visualization.

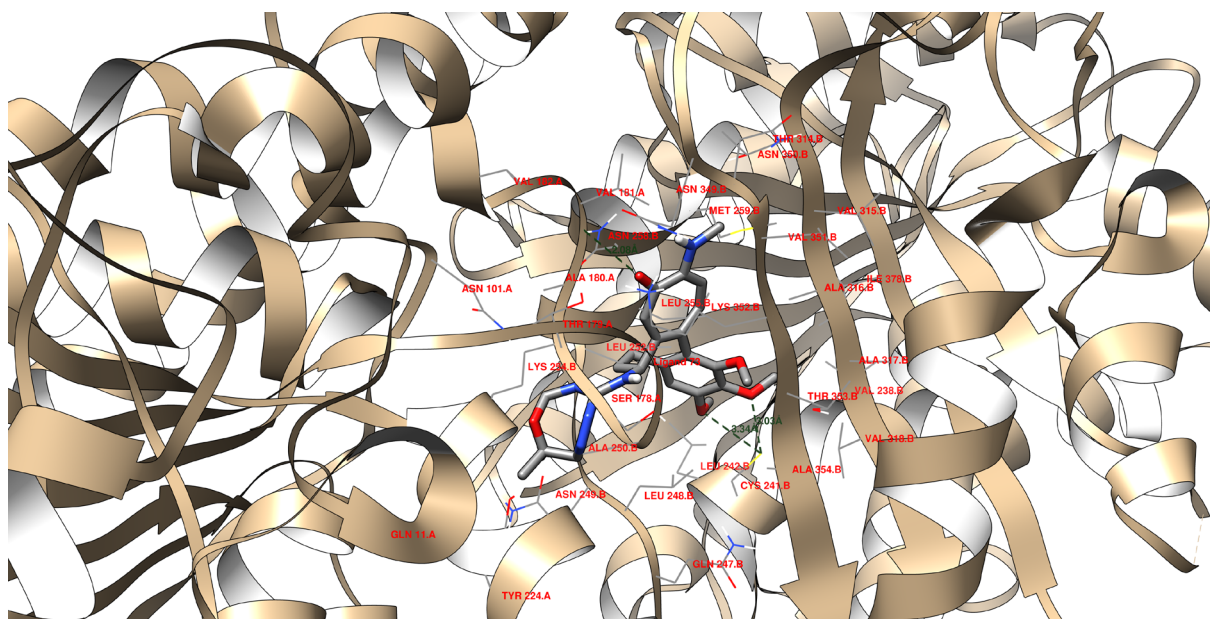

**Figure S2.** AI-proposed new colchicine-based ligand number 73 in the binding site of 1SA0 protein domain.

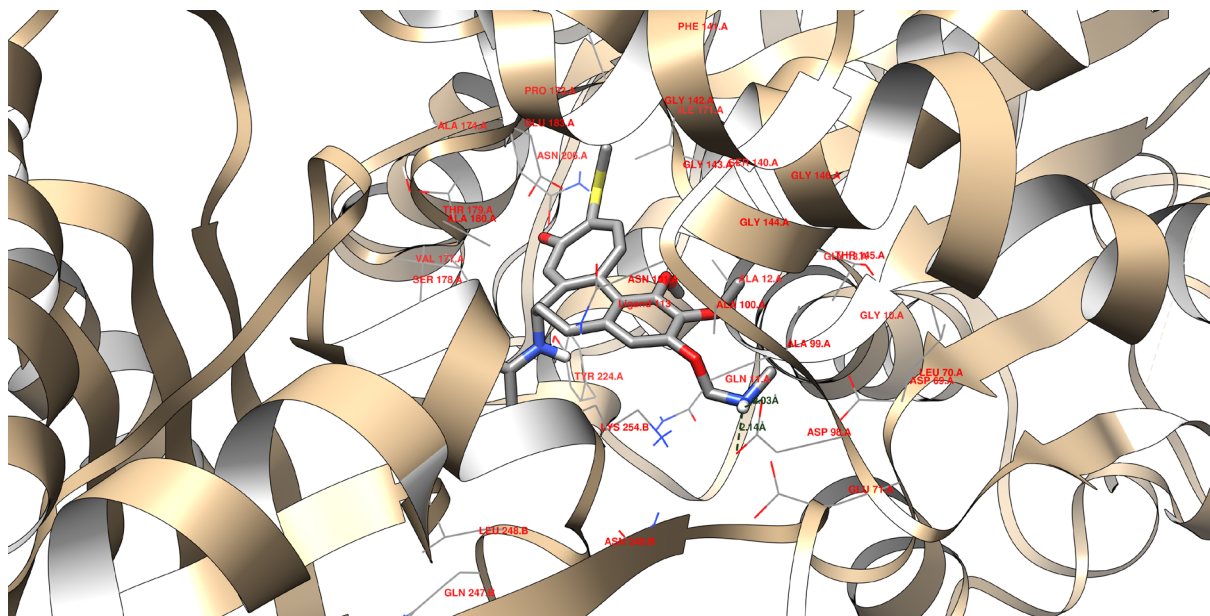

**Figure S3.** AI-proposed new colchicine-based ligand number 113 in the binding site of 1SA0 protein domain.

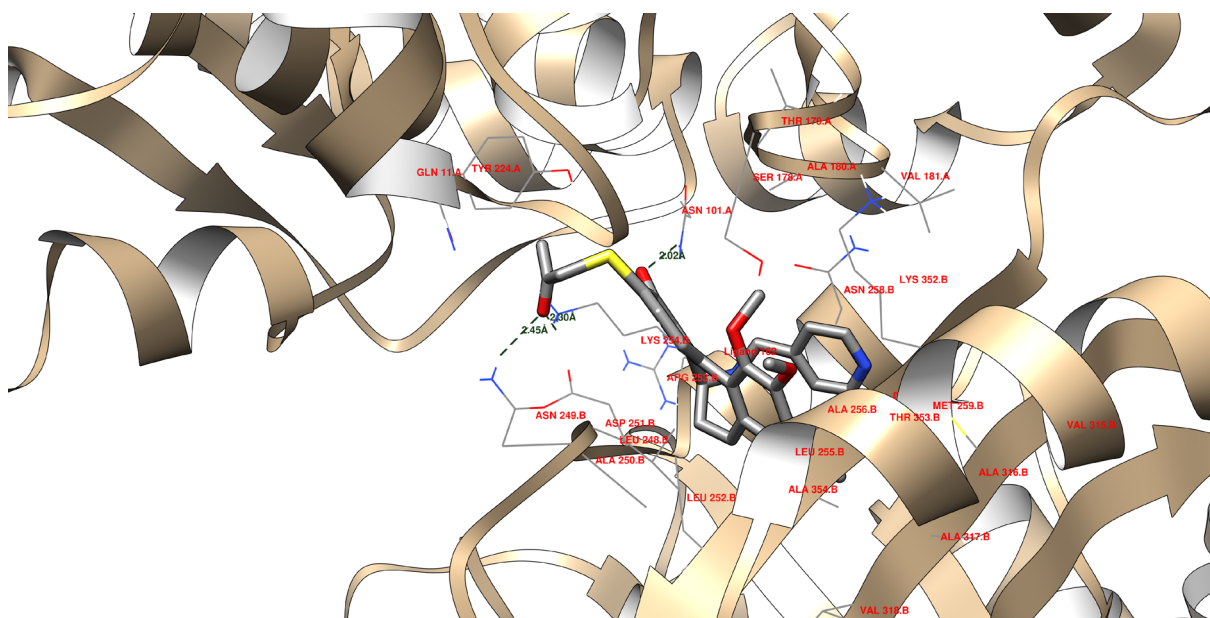

**Figure S4.** AI-proposed new colchicine-based ligand number 162 in the binding site of 1SA0 protein domain.



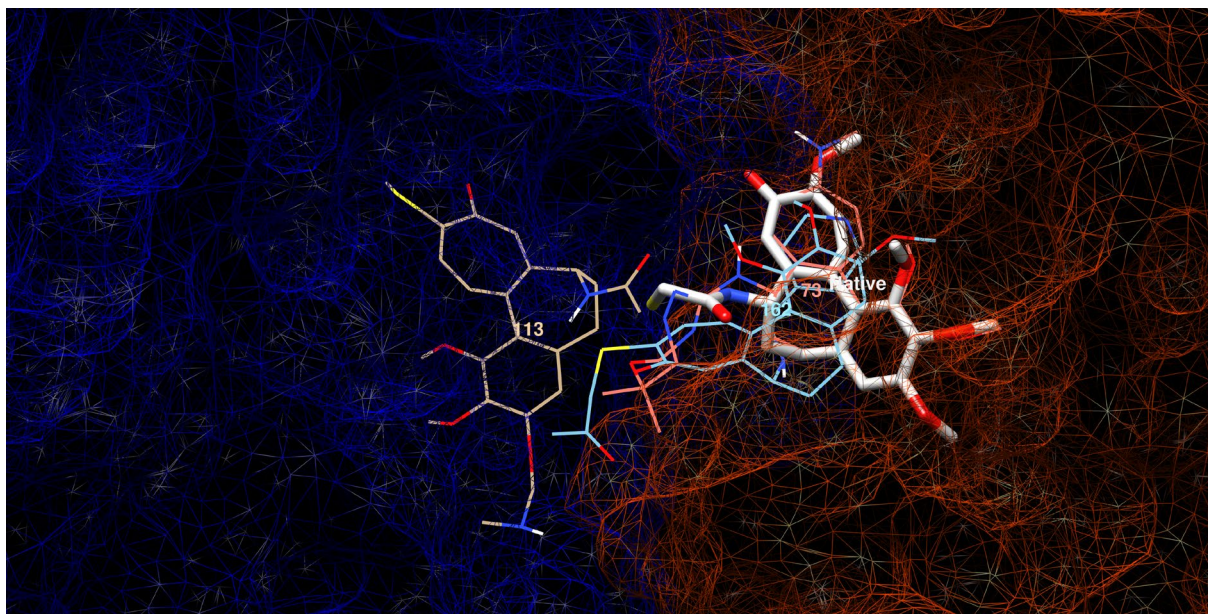

**Figure S5.** All previously visualized structures into a mesh-like 1SA0 protein domain.

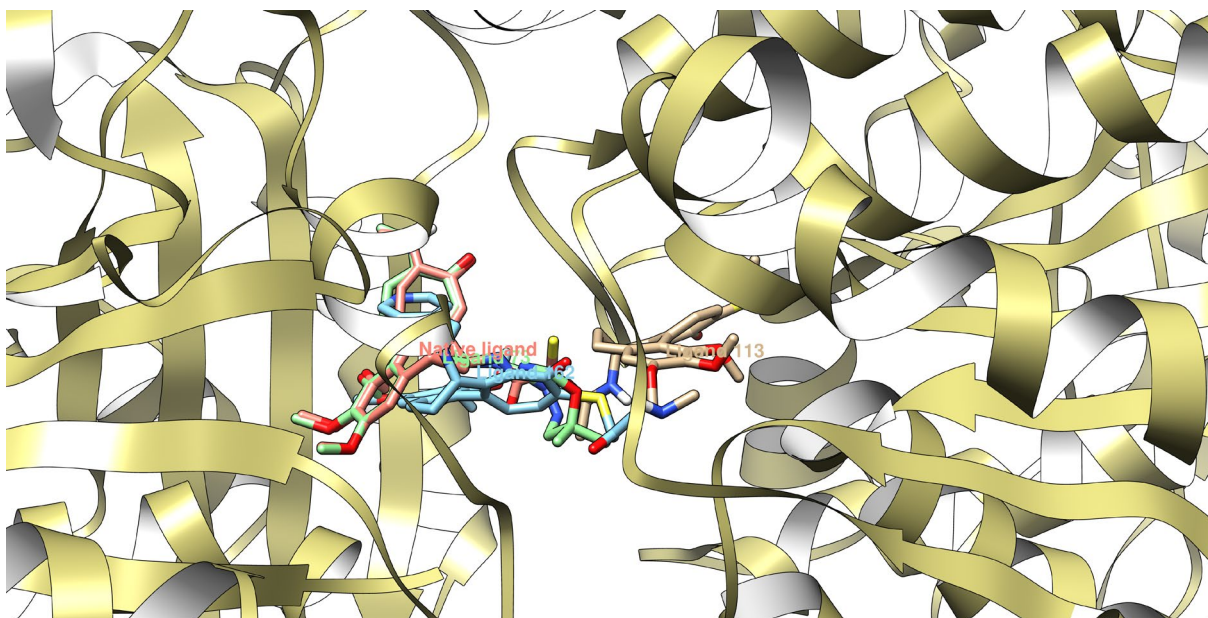

**Figure S6.** All the ligands (native, 73, 113, 162) visualized at once.
