# Supplementary material for: Machine Learning Application for Medicinal Chemistry: Colchicine Case, New Structures, and Anticancer Activity Prediction
Source: MDPI journal article supplement (doi:10.3390/ph17020173), 2024-01-29
Supplement: s1 [file s1]

# Notebook

December 19, 2023

```
[ ]: #####  
# FILE 2  
#####  
  
from rdkit import Chem  
import sys  
from pathlib import Path  
SELFIES_coder_path = Path("../SELFIES_coder")  
sys.path.append(SELFIES_coder_path.as_posix())  
import SELFIES_coder as SELFIES_coder  
import pandas as pd  
  
def read_and_prepare_data(file, reps):  
    #read file  
    data = pd.read_excel(file)  
    #read SMILES  
    #data = data[data['SELFIES_length'] < 55]  
    data = data['SMILES']  
    #prepare rdkit representations  
    mols = [Chem.MolFromSmiles(smi) for smi in data]  
  
    smiles_training = []  
    #prepare various representations for each of molecule  
    for i in range(reps):  
        for smi in mols:  
            try:  
                new_smi = Chem.MolToSmiles(smi, doRandom=True)  
                smiles_training.append(new_smi)  
            except:  
                print("Error when processing", i, smi)  
  
    selfies_training = [SELFIES_coder.SMILES_to_SELFIES(smi) for smi in_  
↪ smiles_training]  
    drop_duplicates_self_train = list(set(selfies_training))  
  
    to_be_tested__ = [SELFIES_coder.SELFIES_to_SMILES(self) for self in_  
↪ drop_duplicates_self_train]
```

```

    drop_duplicates_smmi_train = list(set(to_be_tested_))
    print("The number of training data is_")
    ↪"+str(len(drop_duplicates_smmi_train))

    training_smiles = pd.DataFrame(data=drop_duplicates_smmi_train,
    ↪columns=['SMILES'])

    return training_smiles.to_parquet('../Data/training_smiles.parquet')

if __name__ == "__main__":

    read_and_prepare_data('../Data/Kolchicyna_prepared_data.xlsx', 1000)

```



# Notebook

December 19, 2023

```
[ ]: #####  
# FILE 4  
#####  
  
# General Imports  
import os  
import pandas as pd  
import numpy as np  
import time  
import sys  
from pathlib import Path  
SELFIES_coder_path = Path("../SELFIES_coder")  
sys.path.append(SELFIES_coder_path.as_posix())  
import SELFIES_coder as SELFIES_CODER  
import selfies as sf  
from sklearn.model_selection import train_test_split  
from keras.models import Model  
from keras.layers import Input  
from keras.layers import LSTM  
from keras.layers import Dense  
from keras.layers import Concatenate  
from keras import regularizers  
from keras.callbacks import History, ReduceLROnPlateau  
from tensorflow.keras.optimizers import RMSprop, Adam  
import pickle  
  
SELFIES_CODER.TEST()  
  
def initialize():  
    # Know where user actually is  
    directory_path = os.getcwd()  
    print("My current directory is : " + directory_path)  
    folder_name = os.path.basename(directory_path)  
    print("My directory name is : " + folder_name)
```

```

def load_and_prepare_data(parquet_file):

    data = pd.read_parquet(parquet_file)

    data = SELFIES_CODER.get_encoded_SELFIES(data['SMILES'].to_list())

    # characters that are used in given SMILES dataset along with initial and
    ↪stopping characters
    charset = set("".join(list(data[0]))+"!E")
    char_to_int = dict((c,i) for i,c in enumerate(charset))
    int_to_char = dict((i,c) for i,c in enumerate(charset))
    embed = data[3] + 5 #20
    print("Charset is "+str(charset))

    import json
    json = json.dumps(data[2])
    f = open("SELFIES_to_mol_seq.json","w")
    f.write(json)
    f.close()

    import json
    json = json.dumps(data[1])
    f = open("mol_seq_to_SELFIES.json","w")
    f.write(json)
    f.close()

    import json
    json = json.dumps(char_to_int)
    f = open("mol_seq_to_int.json","w")
    f.write(json)
    f.close()

    import json
    json1 = json.dumps(int_to_char)
    f = open("int_to_mol_seq.json","w")
    f.write(json1)
    f.close()

    mol_seq_train, mol_seq_test = train_test_split(data[0], test_size=0.1,
    ↪train_size=0.9, random_state=42)
    return data, charset, char_to_int, embed, mol_seq_train, mol_seq_test

#vectorization of molecular sequences
def vectorize(mol_seq, shap, embed, char_to_int, charset):
    one_hot = np.zeros((shap, embed , len(charset)),dtype=np.int8)
    for i,smile in enumerate(mol_seq):

```

```

        #encode the startchar
        one_hot[i,0,char_to_int["!"]] = 1
        #encode the rest of the chars
        for j,c in enumerate(smile):
            one_hot[i,j+1,char_to_int[c]] = 1
        #Encode endchar
        one_hot[i,len(smile)+1:,char_to_int["E"]] = 1
        #Return two, one for input and the other for output
        return one_hot[:,0:-1,:], one_hot[:,1:,:]

def data_vectorization(mol_seq_train, mol_seq_test, embed, char_to_int,
↳charset):

    X_train, Y_train = vectorize(mol_seq_train, len(mol_seq_train), embed,
↳char_to_int, charset)
    X_test, Y_test = vectorize(mol_seq_test, len(mol_seq_test), embed,
↳char_to_int, charset)

    return X_train, Y_train, X_test, Y_test

def build_model(X_train, Y_train, X_test, Y_test):

    input_shape = X_train.shape[1:]
    output_dim = Y_train.shape[-1]
    latent_dim = 128
    lstm_dim = 128
    #encoder-decoder architecture
    unroll = False
    encoder_inputs = Input(shape=input_shape)
    encoder = LSTM(lstm_dim, return_state=True,
↳unroll=unroll)
    encoder_outputs, state_h, state_c = encoder(encoder_inputs)
    states = Concatenate(axis=-1)([state_h, state_c])
    neck = Dense(latent_dim, activation="relu")
    neck_outputs = neck(states)

    decode_h = Dense(lstm_dim, activation="relu")
    decode_c = Dense(lstm_dim, activation="relu")
    state_h_decoded = decode_h(neck_outputs)
    state_c_decoded = decode_c(neck_outputs)
    encoder_states = [state_h_decoded, state_c_decoded]
    decoder_inputs = Input(shape=input_shape)
    decoder_lstm = LSTM(lstm_dim,
↳return_sequences=True,
↳unroll=unroll)

```

```

    )
    decoder_outputs = decoder_lstm(decoder_inputs, initial_state=encoder_states)
    decoder_dense = Dense(output_dim, activation='softmax')
    decoder_outputs = decoder_dense(decoder_outputs)
    #Define the model, that inputs the training vector for two places, and
    predicts one character ahead of the input
    model = Model([encoder_inputs, decoder_inputs], decoder_outputs)
    print(model.summary())

    h = History()
    rlr = ReduceLROnPlateau(monitor='val_loss', factor=0.5,patience=10,
    min_lr=0.0000001, verbose=1, min_delta=1e-6) #epsilon=min_delta
    opt=Adam(learning_rate=0.005) #Default 0.001
    model.compile(optimizer=opt, loss='categorical_crossentropy')

    model.fit([X_train,X_train],Y_train, epochs=250, batch_size=128,
    shuffle=True, callbacks=[h, rlr], validation_data=([X_test,X_test],Y_test))
    #100

    f = open("Neural_network_history.pickle","wb")
    pickle.dump(h.history, f)

    smiles_to_latent_model = Model(encoder_inputs, neck_outputs)

    smiles_to_latent_model.save("mol_seq2lat.h5")

    latent_input = Input(shape=(latent_dim,))
    #reuse_layers
    state_h_decoded_2 = decode_h(latent_input)
    state_c_decoded_2 = decode_c(latent_input)
    latent_to_states_model = Model(latent_input, [state_h_decoded_2,
    state_c_decoded_2])
    latent_to_states_model.save("lat2state.h5")

    #Last one is special, we need to change it to stateful, and change the
    input shape
    inf_decoder_inputs = Input(batch_shape=(1, 1, input_shape[1]))
    inf_decoder_lstm = LSTM(lstm_dim,
        return_sequences=True,
        unroll=unroll,
        stateful=True
    )
    inf_decoder_outputs = inf_decoder_lstm(inf_decoder_inputs)
    inf_decoder_dense = Dense(output_dim, activation='softmax')

```

```

inf_decoder_outputs = inf_decoder_dense(inf_decoder_outputs)
sample_model = Model(inf_decoder_inputs, inf_decoder_outputs)

#Transfer Weights
for i in range(1,3):
    sample_model.layers[i].set_weights(model.layers[i+6].get_weights())
sample_model.save("samplemodel.h5")

return print("The model has been successfully build...")

if __name__ == "__main__":

    initialize()

    data, charset, char_to_int, embed, mol_seq_train, mol_seq_test = load_and_prepare_data(' ../Data/training_smiles.parquet')

    X_train, Y_train, X_test, Y_test = data_vectorization(mol_seq_train, mol_seq_test, embed, char_to_int, charset)

    build_model(X_train, Y_train, X_test, Y_test)

```

# Notebook

December 19, 2023

## 1 File 8

```
[1]: import pandas as pd
import numpy as np
```

```
[2]: history__ = pd.read_pickle('Neural_network_history.pickle')
history__.head()
```

```
[2]:
```

|   | loss   | val_loss |
|---|--------|----------|
| 0 | 0.7097 | 0.4202   |
| 1 | 0.3570 | 0.3229   |
| 2 | 0.2981 | 0.2836   |
| 3 | 0.2714 | 0.2648   |
| 4 | 0.2560 | 0.2551   |

```
[15]: from matplotlib import pyplot as plt
%matplotlib inline
plt.plot(history__["loss"], label="Training Loss")
plt.plot(history__["val_loss"], label="Validation Loss")
plt.yscale("log", base=10)
plt.ylim(0.02,1.0)
#plt.yticks(np.arange(0.01, 0.01, 1.0))
plt.rc('grid', linestyle="-. ", color='black')
plt.grid(True)
plt.text(250, history__['loss'][249], str(history__['loss'][249]),
        ↪horizontalalignment='left', fontweight='bold', color='blue')
plt.text(250, history__['val_loss'][249], str(history__['val_loss'][249])+'0',
        ↪horizontalalignment='left', fontweight='bold', color='blue')
plt.legend()
plt.xlabel("Epoch number", fontweight='bold')
plt.ylabel("Loss value", fontweight='bold')
plt.savefig('model_loss_plot_log.pdf', bbox_inches='tight')
plt.show()
```

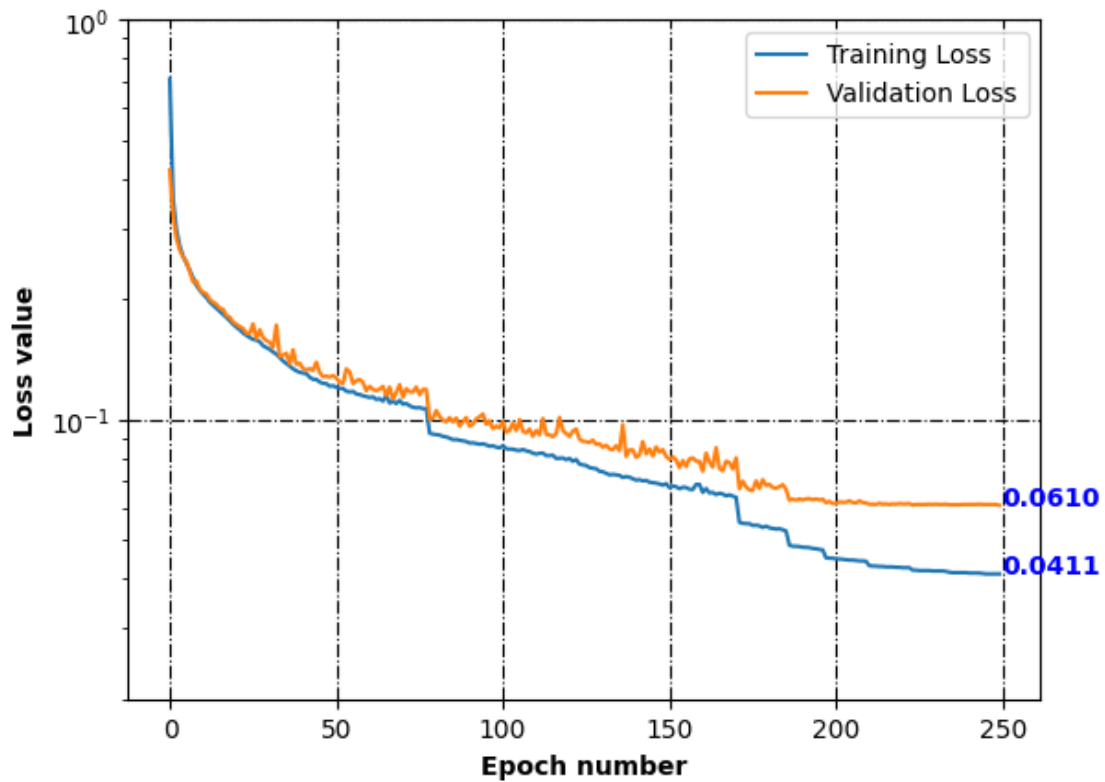

```
[2]: file1 = open("issue.txt", "r")
```

```
[3]: content = file1.readlines()
```

```
[4]: content[290]
```

```
[4]: '831/831 [=====] - 27s 25ms/step - loss: 0.7097 -  
val_loss: 0.4202\n'
```

```
[5]: content[504]
```

```
[5]: '831/831 [=====] - 13s 15ms/step - loss: 0.3570 -  
val_loss: 0.3229\n'
```

```
[6]: step = 504-290  
step
```

```
[6]: 214
```

```
[7]: lk = []  
for i in range(250):  
    lk.append(content[290+step*i])
```

```
[8]: lk[0:5]
```

```
[8]: ['831/831 [=====] - 27s 25ms/step - loss: 0.7097 -  
val_loss: 0.4202\n',  
      '831/831 [=====] - 13s 15ms/step - loss: 0.3570 -  
val_loss: 0.3229\n',  
      '831/831 [=====] - 13s 15ms/step - loss: 0.2981 -  
val_loss: 0.2836\n',  
      '653/831 [=====>...] - ETA: 3s - loss: 0.2731\n',  
      '377/831 [=====>...] - ETA: 10s - loss: 0.2593\n']
```

```
[9]: lk = []  
for i in range(len(content)):  
    if "val" in content[i]:  
        lk.append(content[i])  
    else:  
        pass
```

```
[10]: lk[0:5]
```

```
[10]: ['831/831 [=====] - 27s 25ms/step - loss: 0.7097 -  
val_loss: 0.4202\n',  
      '831/831 [=====] - 13s 15ms/step - loss: 0.3570 -  
val_loss: 0.3229\n',  
      '831/831 [=====] - 13s 15ms/step - loss: 0.2981 -  
val_loss: 0.2836\n',  
      '831/831 [=====] - 18s 22ms/step - loss: 0.2714 -  
val_loss: 0.2648\n',  
      '831/831 [=====] - 21s 25ms/step - loss: 0.2560 -  
val_loss: 0.2551\n']
```

```
[11]: lk[0][65:71]
```

```
[11]: '0.7097'
```

```
[12]: float(lk[0][65:71])
```

```
[12]: 0.7097
```

```
[13]: lk[0][84:-1]
```

```
[13]: '0.4202'
```

```
[14]: train_loss = []  
test_loss = []  
for i in range(len(lk)):  
    train_loss.append(float(lk[i][65:71]))
```



```
test_loss.append(float(lk[i][84:-1]))
```

```
[15]: train_loss
```

```
[15]: [0.7097,  
      0.357,  
      0.2981,  
      0.2714,  
      0.256,  
      0.2461,  
      0.236,  
      0.2259,  
      0.2165,  
      0.2104,  
      0.2058,  
      0.2018,  
      0.1965,  
      0.1931,  
      0.1897,  
      0.1865,  
      0.183,  
      0.1799,  
      0.1766,  
      0.173,  
      0.1701,  
      0.1677,  
      0.1645,  
      0.1623,  
      0.1603,  
      0.1586,  
      0.1579,  
      0.1564,  
      0.1529,  
      0.1512,  
      0.1497,  
      0.1475,  
      0.1456,  
      0.1429,  
      0.1401,  
      0.138,  
      0.136,  
      0.1339,  
      0.1323,  
      0.1312,  
      0.1306,  
      0.1302,  
      0.1275,
```

0.126,  
0.1259,  
0.1241,  
0.1231,  
0.1229,  
0.1211,  
0.1214,  
0.1203,  
0.1196,  
0.1196,  
0.1176,  
0.1172,  
0.1175,  
0.1158,  
0.1154,  
0.1146,  
0.114,  
0.1135,  
0.1139,  
0.1122,  
0.1127,  
0.1111,  
0.1149,  
0.1099,  
0.111,  
0.1096,  
0.1116,  
0.1092,  
0.1096,  
0.1082,  
0.1073,  
0.1069,  
0.1071,  
0.1064,  
0.1065,  
0.0924,  
0.0919,  
0.0917,  
0.0914,  
0.0907,  
0.0904,  
0.0898,  
0.089,  
0.0891,  
0.0887,  
0.0884,  
0.0881,

0.0873,  
0.0874,  
0.087,  
0.0867,  
0.0869,  
0.0864,  
0.0857,  
0.0859,  
0.0853,  
0.0849,  
0.0859,  
0.0845,  
0.0843,  
0.0843,  
0.0838,  
0.0836,  
0.0841,  
0.0835,  
0.0831,  
0.0824,  
0.0819,  
0.0823,  
0.0824,  
0.0812,  
0.0812,  
0.0814,  
0.0799,  
0.08,  
0.0801,  
0.0793,  
0.0799,  
0.0786,  
0.0794,  
0.0773,  
0.077,  
0.0767,  
0.0758,  
0.0755,  
0.0753,  
0.0742,  
0.074,  
0.0733,  
0.0727,  
0.0729,  
0.0727,  
0.0725,  
0.0716,

0.072,  
0.0717,  
0.0711,  
0.0705,  
0.0707,  
0.0702,  
0.0704,  
0.0697,  
0.0695,  
0.0693,  
0.069,  
0.0685,  
0.0691,  
0.0675,  
0.0682,  
0.0679,  
0.0671,  
0.0677,  
0.0676,  
0.0669,  
0.0668,  
0.0688,  
0.0688,  
0.0657,  
0.0672,  
0.0655,  
0.0657,  
0.0649,  
0.0654,  
0.0651,  
0.0644,  
0.0648,  
0.0643,  
0.0639,  
0.0553,  
0.055,  
0.0549,  
0.0549,  
0.0543,  
0.0544,  
0.0542,  
0.0537,  
0.0541,  
0.0536,  
0.0534,  
0.0532,  
0.0533,

0.053,  
0.0526,  
0.0485,  
0.0482,  
0.0482,  
0.0481,  
0.0479,  
0.0479,  
0.0478,  
0.0476,  
0.0475,  
0.0473,  
0.0472,  
0.0451,  
0.045,  
0.045,  
0.0448,  
0.0448,  
0.0447,  
0.0446,  
0.0445,  
0.0445,  
0.0444,  
0.0443,  
0.0443,  
0.0442,  
0.0431,  
0.043,  
0.043,  
0.0429,  
0.0429,  
0.0428,  
0.0428,  
0.0428,  
0.0427,  
0.0427,  
0.0426,  
0.0426,  
0.0426,  
0.042,  
0.042,  
0.0419,  
0.0419,  
0.0419,  
0.0419,  
0.0418,  
0.0418,

```
0.0418,  
0.0418,  
0.0417,  
0.0415,  
0.0414,  
0.0414,  
0.0414,  
0.0414,  
0.0414,  
0.0413,  
0.0413,  
0.0413,  
0.0413,  
0.0412,  
0.0411,  
0.0411,  
0.0411,  
0.0411,  
0.0411]
```

```
[16]: test_loss
```

```
[16]: [0.4202,  
0.3229,  
0.2836,  
0.2648,  
0.2551,  
0.2486,  
0.2343,  
0.2206,  
0.2218,  
0.2115,  
0.2079,  
0.2061,  
0.1995,  
0.1964,  
0.194,  
0.1897,  
0.1886,  
0.1818,  
0.1802,  
0.1752,  
0.1729,  
0.1707,  
0.1689,  
0.1643,  
0.1639,
```

0.1733,  
0.1591,  
0.1676,  
0.1602,  
0.1575,  
0.1558,  
0.1515,  
0.1721,  
0.1436,  
0.1448,  
0.1464,  
0.1377,  
0.1494,  
0.1374,  
0.1382,  
0.1341,  
0.1329,  
0.1339,  
0.1326,  
0.1391,  
0.1311,  
0.1278,  
0.1284,  
0.1276,  
0.1287,  
0.1269,  
0.1239,  
0.1231,  
0.1337,  
0.1316,  
0.123,  
0.125,  
0.1258,  
0.1237,  
0.118,  
0.121,  
0.1189,  
0.1181,  
0.1191,  
0.1209,  
0.1146,  
0.1205,  
0.1125,  
0.1167,  
0.1222,  
0.1137,  
0.1193,

0.1173,  
0.1172,  
0.1205,  
0.1154,  
0.1189,  
0.1189,  
0.1002,  
0.1007,  
0.1052,  
0.1018,  
0.0995,  
0.0987,  
0.1011,  
0.0986,  
0.1008,  
0.0963,  
0.0985,  
0.1011,  
0.0962,  
0.0973,  
0.1003,  
0.1015,  
0.1032,  
0.0973,  
0.0993,  
0.0948,  
0.0963,  
0.0953,  
0.0987,  
0.0929,  
0.094,  
0.0978,  
0.0938,  
0.1,  
0.0934,  
0.0926,  
0.0946,  
0.0908,  
0.0938,  
0.0916,  
0.1006,  
0.0918,  
0.0915,  
0.0906,  
0.0921,  
0.1012,  
0.0938,



0.0923,  
0.0907,  
0.0935,  
0.0947,  
0.0893,  
0.0882,  
0.088,  
0.0876,  
0.0888,  
0.0866,  
0.087,  
0.0852,  
0.0862,  
0.0844,  
0.0841,  
0.086,  
0.0836,  
0.097,  
0.0808,  
0.0839,  
0.0839,  
0.0804,  
0.0815,  
0.088,  
0.082,  
0.0844,  
0.081,  
0.0854,  
0.0829,  
0.0841,  
0.0808,  
0.0795,  
0.0806,  
0.0792,  
0.0758,  
0.0789,  
0.0763,  
0.0797,  
0.0801,  
0.0787,  
0.0785,  
0.0742,  
0.0824,  
0.0783,  
0.076,  
0.085,  
0.0755,

0.0744,  
0.0786,  
0.078,  
0.0752,  
0.0802,  
0.0671,  
0.0701,  
0.0678,  
0.0666,  
0.0665,  
0.0702,  
0.0672,  
0.0707,  
0.0684,  
0.0688,  
0.0676,  
0.0673,  
0.0679,  
0.0687,  
0.0669,  
0.0628,  
0.0632,  
0.0628,  
0.0633,  
0.0629,  
0.0633,  
0.0634,  
0.063,  
0.0633,  
0.0629,  
0.0632,  
0.0619,  
0.0624,  
0.0616,  
0.0617,  
0.0622,  
0.0621,  
0.0621,  
0.0626,  
0.062,  
0.0618,  
0.0626,  
0.062,  
0.0618,  
0.0614,  
0.0614,  
0.0613,

0.0617,  
0.0614,  
0.0615,  
0.0613,  
0.0615,  
0.0614,  
0.0616  
0.0615,  
0.0615,  
0.0616,  
0.0611,  
0.0613,  
0.0613,  
0.0613,  
0.0613,  
0.0614,  
0.0613,  
0.0614,  
0.0613,  
0.0613,  
0.0614,  
0.0612,  
0.0612,  
0.0612,  
0.0612,  
0.0613,  
0.0613,  
0.0613,  
0.0613,  
0.0613,  
0.0614,  
0.0613,  
0.0613,  
0.0613,  
0.0613,  
0.0613,  
0.061]

```
[17]: dff = pd.DataFrame(data=train_loss, columns=['loss'])
      dff['val_loss'] = test_loss
      dff.head()
```

```
[17]:
```

|   | loss   | val_loss |
|---|--------|----------|
| 0 | 0.7097 | 0.4202   |
| 1 | 0.3570 | 0.3229   |
| 2 | 0.2981 | 0.2836   |
| 3 | 0.2714 | 0.2648   |

```
4  0.2560    0.2551
```

```
[18]: import pickle
```

```
[21]: f = open("Neural_network_history.pickle","wb")  
pickle.dump(dff, f)
```

# Notebook

December 19, 2023

## 1 File 12

```
[1]: import sys
from pathlib import Path
prediction_mode_path = Path("../module")
sys.path.append(prediction_mode_path.as_posix())
import models_creation as pred_model

import pandas as pd
import numpy as np

from matplotlib import pyplot as plt
```

```
[2]: pad = pd.read_excel('../Data/Kolchicyna_prepared_data.xlsx')
pad.head()
```

```
[2]: Unnamed: 0      Publikacja DOI \
0      0  https://doi.org/10.1016/j.bmcl.2021.128382
1      1  https://doi.org/10.1016/j.bmcl.2021.128382
2      2  https://doi.org/10.1016/j.bmcl.2021.128382
3      3  https://doi.org/10.1016/j.bmcl.2021.128382
4      4  https://doi.org/10.1016/j.bmcl.2021.128382
```

```
Numer związku w publikacji \
0      1
1      2
2      3
3      4
4      5
```

```
SMILES  Atywność [nM]  A549 \
0  COc2c3C1=CC=C(SC)C(=O)C=C1 [C@H] (CCc3cc(OC)c2OC...  Atywność [nM]  10,8
1  COc2c3C1=CC=C(SC)C(=O)C=C1 [C@H] (CCc3cc(OC)c2OC...  Atywność [nM]  11,6
2  COc2c3C1=CC=C(SC)C(=O)C=C1 [C@H] (CCc3cc(OC)c2OC...  Atywność [nM]  10,9
3  CC(C)CN [C@H] 2CCc3cc(OC)c(OC)c(OC)c3C1=CC=C(SC)...  Atywność [nM]  10,5
4  COc2c3C1=CC=C(SC)C(=O)C=C1 [C@H] (CCc3cc(OC)c2OC...  Atywność [nM]  89,5
```

```
MCF-7  LoVo LoVo/DX BALB/3T3  A549_float  MCF-7_float  LoVo_float \
```

|   |      |      |      |      |      |      |      |
|---|------|------|------|------|------|------|------|
| 0 | 10,3 | 6,5  | 54,9 | 10,2 | 10.8 | 10.3 | 6.5  |
| 1 | 12,0 | 8,5  | 31.1 | 14.3 | 11.6 | 12.0 | 8.5  |
| 2 | 12,2 | 8,8  | 17,9 | 11,7 | 10.9 | 12.2 | 8.8  |
| 3 | 11,3 | 8,5  | 10,2 | 11,0 | 10.5 | 11.3 | 8.5  |
| 4 | 92,7 | 52,8 | 77,8 | 99,4 | 89.5 | 92.7 | 52.8 |

|   | LoVo/DX_float | BALB/3T3_float |
|---|---------------|----------------|
| 0 | 54.9          | 10.2           |
| 1 | 31.1          | 14.3           |
| 2 | 17.9          | 11.7           |
| 3 | 10.2          | 11.0           |
| 4 | 77.8          | 99.4           |

```
[3]: list(pad.columns)[10:]
```

```
[3]: ['A549_float', 'MCF-7_float', 'LoVo_float', 'LoVo/DX_float', 'BALB/3T3_float']
```

```
[4]: molecular_descriptors_df = pred_model.prepare_data('../Data/
↳Kolchicyna_prepared_data.xlsx')
```

100%|

| 120/120 [00:04<00:00, 29.90it/s]

Data size (rows, columns): (120, 1613)

Data size after first reduction (rows, columns): (120, 1443)

Data size after second reduction (rows, columns): (120, 1211)

```
[5]: molecular_descriptors_df.head()
```

```
[5]:
```

|   | AATSOZ    | AATSOare | AATSOd   | AATSOdv  | AATSOi     | AATSOm    | AATSOp \ |
|---|-----------|----------|----------|----------|------------|-----------|----------|
| 0 | 25.090909 | 6.046518 | 3.109091 | 6.662626 | 160.775045 | 99.075564 | 1.555512 |
| 1 | 24.448276 | 6.008422 | 3.051724 | 6.386973 | 161.021674 | 96.473315 | 1.538471 |
| 2 | 23.868852 | 5.974074 | 3.000000 | 6.138434 | 161.244045 | 94.127025 | 1.523105 |
| 3 | 23.868852 | 5.974074 | 3.032787 | 6.171220 | 161.244045 | 94.127025 | 1.523105 |
| 4 | 23.343750 | 5.942945 | 2.953125 | 5.913194 | 161.445569 | 92.000700 | 1.509180 |

|   | AATSOpe  | AATSOs   | AATSOse  | ... | piPC5    | piPC6    | piPC7    | piPC8 \  |
|---|----------|----------|----------|-----|----------|----------|----------|----------|
| 0 | 6.126680 | 3.435416 | 7.629859 | ... | 6.098566 | 6.595759 | 6.979116 | 7.337313 |
| 1 | 6.088791 | 3.330998 | 7.596891 | ... | 6.103048 | 6.601209 | 6.985613 | 7.349442 |
| 2 | 6.054630 | 3.236850 | 7.567166 | ... | 6.105281 | 6.603923 | 6.989306 | 7.353932 |
| 3 | 6.054630 | 3.257798 | 7.567166 | ... | 6.107510 | 6.606629 | 6.992068 | 7.361425 |
| 4 | 6.023670 | 3.151529 | 7.540228 | ... | 6.107510 | 6.605277 | 6.991148 | 7.356489 |

|   | piPC9    | A549_float | MCF-7_float | LoVo_float | LoVo/DX_float \ |
|---|----------|------------|-------------|------------|-----------------|
| 0 | 7.681445 | 10.8       | 10.3        | 6.5        | 54.9            |
| 1 | 7.695531 | 11.6       | 12.0        | 8.5        | 31.1            |
| 2 | 7.704023 | 10.9       | 12.2        | 8.8        | 17.9            |
| 3 | 7.709420 | 10.5       | 11.3        | 8.5        | 10.2            |

```
4  7.707175      89.5      92.7      52.8      77.8
```

```

BALB/3T3_float
0      10.2
1      14.3
2      11.7
3      11.0
4      99.4

```

```
[5 rows x 1216 columns]
```

```
[6]: temp_li = list(pad.columns)[10:]
```

```
[7]: temp_li
```

```
[7]: ['A549_float', 'MCF-7_float', 'LoVo_float', 'LoVo/DX_float', 'BALB/3T3_float']
```

```
[8]: for element in temp_li:
      molecular_descriptors_df[str(element+('_transformed'))] = pred_model.
      ↪transform(molecular_descriptors_df[element])
```

```
[9]: molecular_descriptors_df.head()
```

```
[9]:
      AATS0Z  AATS0are  AATS0d  AATS0dv  AATS0i  AATS0m  AATS0p  \
0  25.090909  6.046518  3.109091  6.662626  160.775045  99.075564  1.555512
1  24.448276  6.008422  3.051724  6.386973  161.021674  96.473315  1.538471
2  23.868852  5.974074  3.000000  6.138434  161.244045  94.127025  1.523105
3  23.868852  5.974074  3.032787  6.171220  161.244045  94.127025  1.523105
4  23.343750  5.942945  2.953125  5.913194  161.445569  92.000700  1.509180
```

```

      AATS0pe  AATS0s  AATS0se  ...  A549_float  MCF-7_float  LoVo_float  \
0  6.126680  3.435416  7.629859  ...      10.8      10.3      6.5
1  6.088791  3.330998  7.596891  ...      11.6      12.0      8.5
2  6.054630  3.236850  7.567166  ...      10.9      12.2      8.8
3  6.054630  3.257798  7.567166  ...      10.5      11.3      8.5
4  6.023670  3.151529  7.540228  ...      89.5      92.7      52.8

```

```

      LoVo/DX_float  BALB/3T3_float  A549_float_transformed  \
0      54.9      10.2      7.966576
1      31.1      14.3      7.935542
2      17.9      11.7      7.962574
3      10.2      11.0      7.978811
4      77.8      99.4      7.048177

```

```

      MCF-7_float_transformed  LoVo_float_transformed  LoVo/DX_float_transformed  \
0      7.987163      8.187087      7.260428
1      7.920819      8.070581      7.507240

```

|   |          |          |          |
|---|----------|----------|----------|
| 2 | 7.913640 | 8.055517 | 7.747147 |
| 3 | 7.946922 | 8.070581 | 7.991400 |
| 4 | 7.032920 | 7.277366 | 7.109020 |

|   | BALB/3T3_float_transformed |
|---|----------------------------|
| 0 | 7.991400                   |
| 1 | 7.844664                   |
| 2 | 7.931814                   |
| 3 | 7.958607                   |
| 4 | 7.002614                   |

[5 rows x 1221 columns]

```
[10]: molecular_descriptors_df.to_excel('../Data/Kolchicyna_machine_learning.xlsx')
```

```
[11]: for hist_ in temp_li:
        fig, axes = plt.subplots(1, 2, layout="constrained")

        print(molecular_descriptors_df[hist_].hist(ax=axes[0]))
        print(molecular_descriptors_df[hist_+'_transformed'].hist(ax=axes[1]))
        print(fig.suptitle('Before (left) and after (right) transformation:␣
↵'+(hist_)))
```

```
AxesSubplot(0.125,0.11;0.352273x0.77)
AxesSubplot(0.547727,0.11;0.352273x0.77)
Text(0.5, 0.98, 'Before (left) and after (right) transformation: A549_float')
AxesSubplot(0.125,0.11;0.352273x0.77)
AxesSubplot(0.547727,0.11;0.352273x0.77)
Text(0.5, 0.98, 'Before (left) and after (right) transformation: MCF-7_float')
AxesSubplot(0.125,0.11;0.352273x0.77)
AxesSubplot(0.547727,0.11;0.352273x0.77)
Text(0.5, 0.98, 'Before (left) and after (right) transformation: LoVo_float')
AxesSubplot(0.125,0.11;0.352273x0.77)
AxesSubplot(0.547727,0.11;0.352273x0.77)
Text(0.5, 0.98, 'Before (left) and after (right) transformation: LoVo/DX_float')
AxesSubplot(0.125,0.11;0.352273x0.77)
AxesSubplot(0.547727,0.11;0.352273x0.77)
Text(0.5, 0.98, 'Before (left) and after (right) transformation:
BALB/3T3_float')
```



Before (left) and after (right) transformation: A549\_float

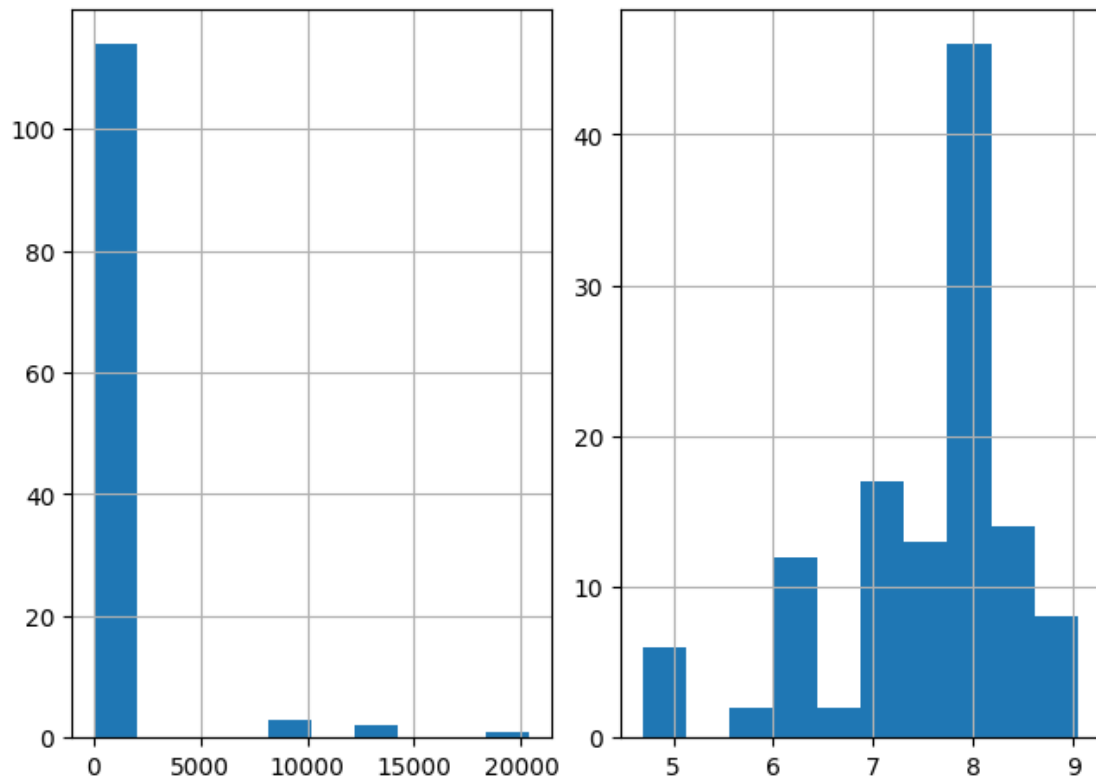

Before (left) and after (right) transformation: MCF-7\_float

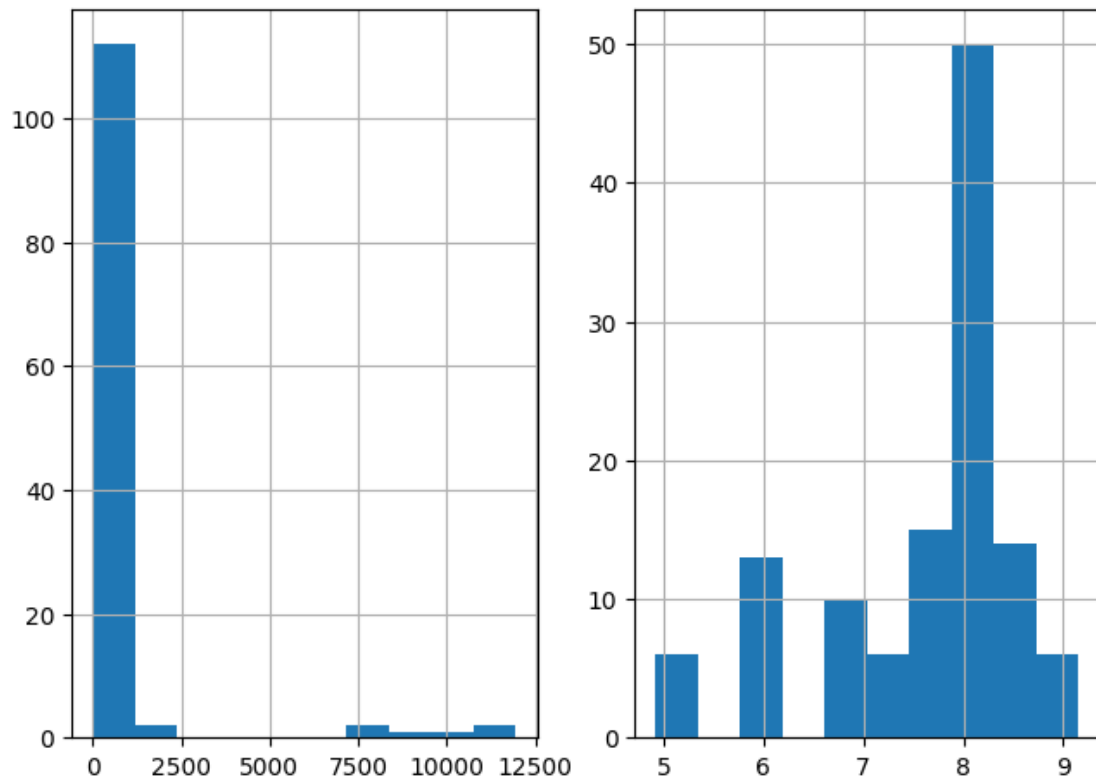

Before (left) and after (right) transformation: LoVo\_float

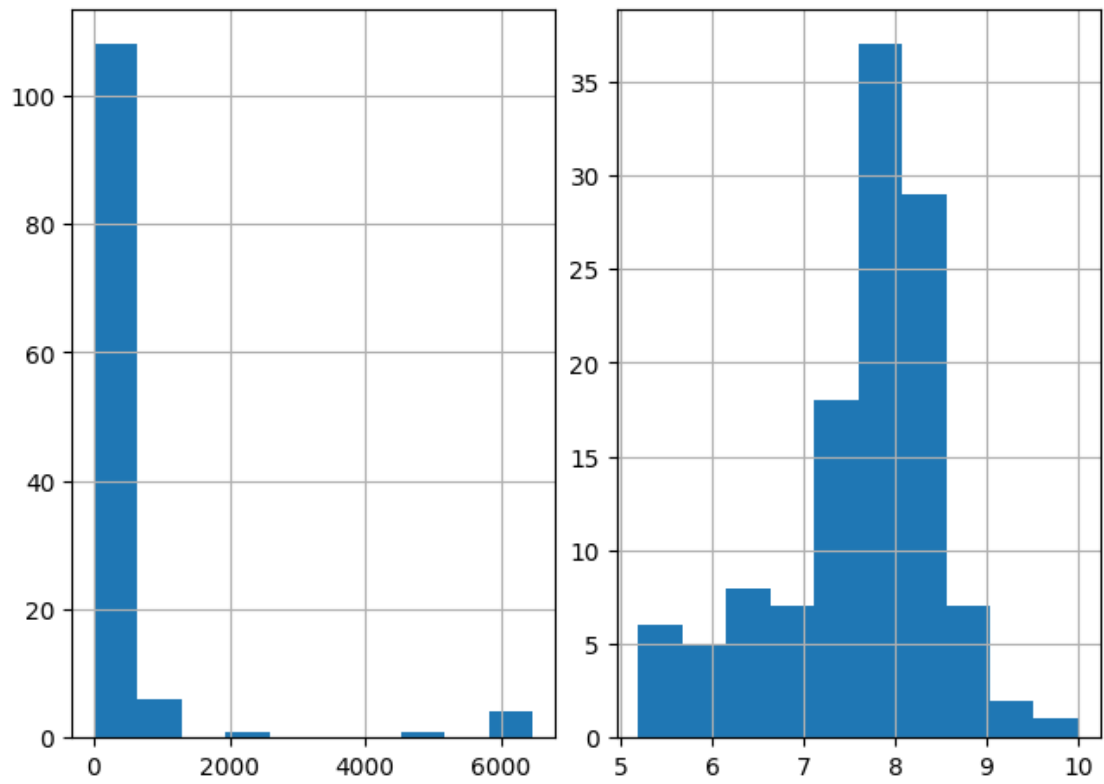

Before (left) and after (right) transformation: LoVo/DX\_float

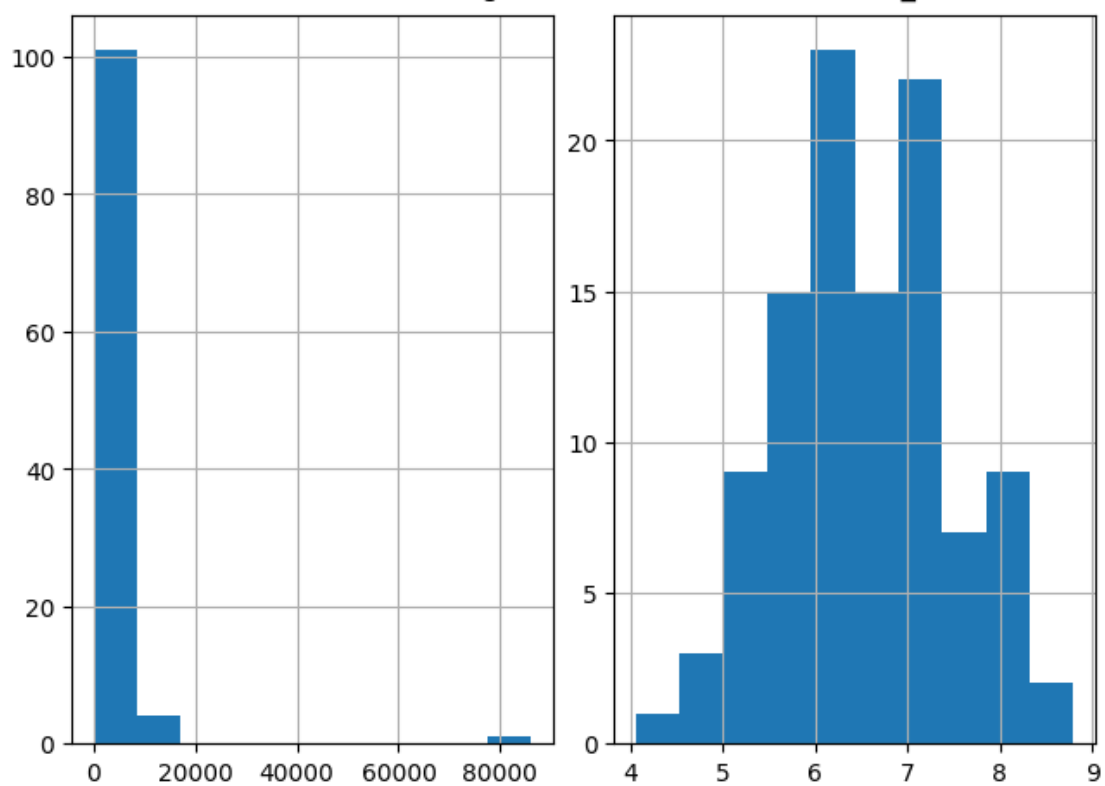

Before (left) and after (right) transformation: BALB/3T3\_float

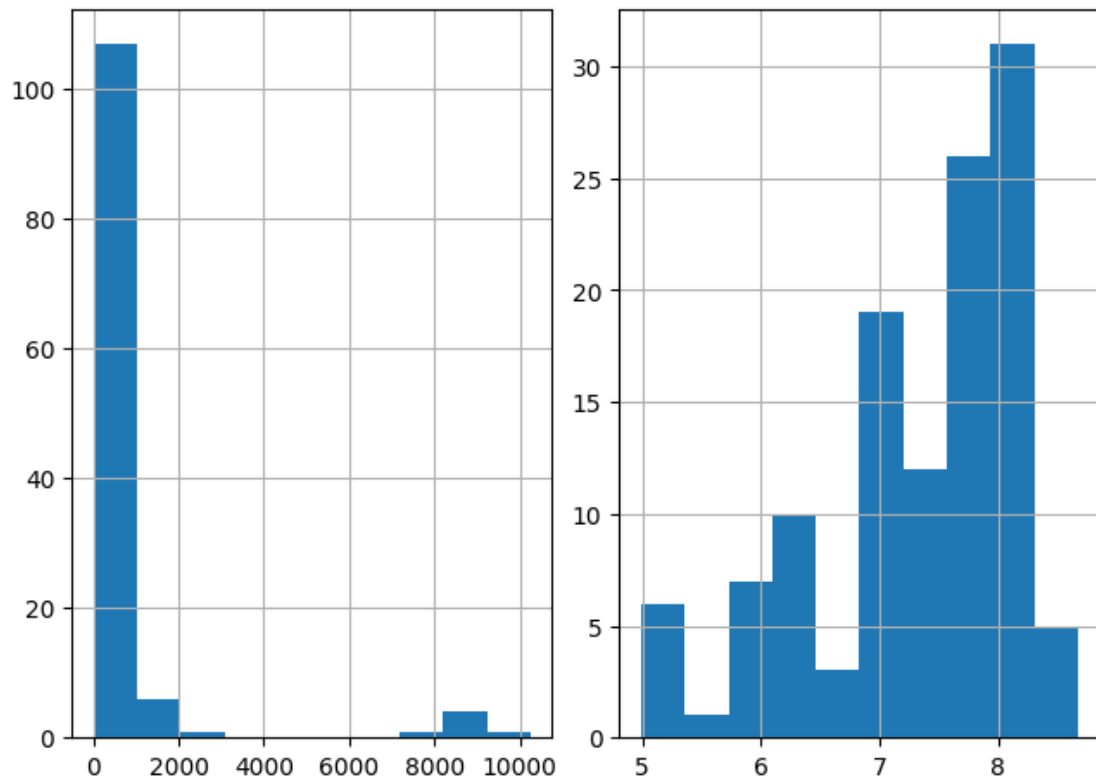

# Notebook

December 19, 2023

## 1 File 14

```
[1]: import sys
from pathlib import Path
prediction_mode_path = Path("../module")
sys.path.append(prediction_mode_path.as_posix())
import models_creation as pred_model

import pandas as pd
import numpy as np

from sklearn.metrics import r2_score

import matplotlib.pyplot as plt
from sklearn.tree import plot_tree

from matplotlib import pyplot as plt

import joblib

import warnings
warnings.filterwarnings('ignore')
```

```
[2]: load_prepared_data = pd.read_excel('../Data/Kolchicyna_machine_learning.xlsx')
load_prepared_data = load_prepared_data.drop(columns=['Unnamed: 0'])
```

```
[3]: load_prepared_data.head()
```

```
[3]:
```

|   | AATS0Z    | AATS0are | AATS0d   | AATS0dv  | AATS0i     | AATS0m    | AATS0p   | \ |
|---|-----------|----------|----------|----------|------------|-----------|----------|---|
| 0 | 25.090909 | 6.046518 | 3.109091 | 6.662626 | 160.775045 | 99.075564 | 1.555512 |   |
| 1 | 24.448276 | 6.008422 | 3.051724 | 6.386973 | 161.021674 | 96.473315 | 1.538471 |   |
| 2 | 23.868852 | 5.974074 | 3.000000 | 6.138434 | 161.244045 | 94.127025 | 1.523105 |   |
| 3 | 23.868852 | 5.974074 | 3.032787 | 6.171220 | 161.244045 | 94.127025 | 1.523105 |   |
| 4 | 23.343750 | 5.942945 | 2.953125 | 5.913194 | 161.445569 | 92.000700 | 1.509180 |   |

|   | AATS0pe  | AATS0s   | AATS0se  | ... | A549_float | MCF-7_float | LoVo_float | \ |
|---|----------|----------|----------|-----|------------|-------------|------------|---|
| 0 | 6.126680 | 3.435416 | 7.629859 | ... | 10.8       | 10.3        | 6.5        |   |
| 1 | 6.088791 | 3.330998 | 7.596891 | ... | 11.6       | 12.0        | 8.5        |   |

|   |          |          |          |     |      |      |      |
|---|----------|----------|----------|-----|------|------|------|
| 2 | 6.054630 | 3.236850 | 7.567166 | ... | 10.9 | 12.2 | 8.8  |
| 3 | 6.054630 | 3.257798 | 7.567166 | ... | 10.5 | 11.3 | 8.5  |
| 4 | 6.023670 | 3.151529 | 7.540228 | ... | 89.5 | 92.7 | 52.8 |

|   | LoVo/DX_float | BALB/3T3_float | A549_float_transformed | \ |
|---|---------------|----------------|------------------------|---|
| 0 | 54.9          | 10.2           | 7.966576               |   |
| 1 | 31.1          | 14.3           | 7.935542               |   |
| 2 | 17.9          | 11.7           | 7.962574               |   |
| 3 | 10.2          | 11.0           | 7.978811               |   |
| 4 | 77.8          | 99.4           | 7.048177               |   |

|   | MCF-7_float_transformed | LoVo_float_transformed | LoVo/DX_float_transformed | \ |
|---|-------------------------|------------------------|---------------------------|---|
| 0 | 7.987163                | 8.187087               | 7.260428                  |   |
| 1 | 7.920819                | 8.070581               | 7.507240                  |   |
| 2 | 7.913640                | 8.055517               | 7.747147                  |   |
| 3 | 7.946922                | 8.070581               | 7.991400                  |   |
| 4 | 7.032920                | 7.277366               | 7.109020                  |   |

|   | BALB/3T3_float_transformed |
|---|----------------------------|
| 0 | 7.991400                   |
| 1 | 7.844664                   |
| 2 | 7.931814                   |
| 3 | 7.958607                   |
| 4 | 7.002614                   |

[5 rows x 1221 columns]

```
[4]: list(load_prepared_data.columns)[-5:]
```

```
[4]: ['A549_float_transformed',
      'MCF-7_float_transformed',
      'LoVo_float_transformed',
      'LoVo/DX_float_transformed',
      'BALB/3T3_float_transformed']
```

```
[5]: list(load_prepared_data.columns)[0:-5][-6] #last molecular descriptor
```

```
[5]: 'piPC9'
```

```
[6]: list(load_prepared_data.columns)[0:-10][-1]
```

```
[6]: 'piPC9'
```

```
[7]: len(list(load_prepared_data.columns)[0:-10])
```

```
[7]: 1211
```

## 1.1 A549

```
[8]: data = load_prepared_data[list(load_prepared_data.columns)[0:-10]]
```

```
[9]: data['A549'] = load_prepared_data[load_prepared_data.columns[-5]]
```

```
[10]: data.head()
```

```
[10]:
```

|   | AATSOZ    | AATSOare | AATSOd   | AATSOdv  | AATSOi     | AATSOm    | AATSOp   | \ |
|---|-----------|----------|----------|----------|------------|-----------|----------|---|
| 0 | 25.090909 | 6.046518 | 3.109091 | 6.662626 | 160.775045 | 99.075564 | 1.555512 |   |
| 1 | 24.448276 | 6.008422 | 3.051724 | 6.386973 | 161.021674 | 96.473315 | 1.538471 |   |
| 2 | 23.868852 | 5.974074 | 3.000000 | 6.138434 | 161.244045 | 94.127025 | 1.523105 |   |
| 3 | 23.868852 | 5.974074 | 3.032787 | 6.171220 | 161.244045 | 94.127025 | 1.523105 |   |
| 4 | 23.343750 | 5.942945 | 2.953125 | 5.913194 | 161.445569 | 92.000700 | 1.509180 |   |

  

|   | AATSOpe  | AATSOs   | AATSOse  | ... | piPC10   | piPC2    | piPC3    | piPC4    | \ |
|---|----------|----------|----------|-----|----------|----------|----------|----------|---|
| 0 | 6.126680 | 3.435416 | 7.629859 | ... | 7.999655 | 4.266195 | 4.915408 | 5.516700 |   |
| 1 | 6.088791 | 3.330998 | 7.596891 | ... | 8.018726 | 4.280132 | 4.922714 | 5.520711 |   |
| 2 | 6.054630 | 3.236850 | 7.567166 | ... | 8.028799 | 4.293878 | 4.929967 | 5.524706 |   |
| 3 | 6.054630 | 3.257798 | 7.567166 | ... | 8.037440 | 4.307438 | 4.929967 | 5.524706 |   |
| 4 | 6.023670 | 3.151529 | 7.540228 | ... | 8.034892 | 4.307438 | 4.937168 | 5.528685 |   |

  

|   | piPC5    | piPC6    | piPC7    | piPC8    | piPC9    | A549     |
|---|----------|----------|----------|----------|----------|----------|
| 0 | 6.098566 | 6.595759 | 6.979116 | 7.337313 | 7.681445 | 7.966576 |
| 1 | 6.103048 | 6.601209 | 6.985613 | 7.349442 | 7.695531 | 7.935542 |
| 2 | 6.105281 | 6.603923 | 6.989306 | 7.353932 | 7.704023 | 7.962574 |
| 3 | 6.107510 | 6.606629 | 6.992068 | 7.361425 | 7.709420 | 7.978811 |
| 4 | 6.107510 | 6.605277 | 6.991148 | 7.356489 | 7.707175 | 7.048177 |

[5 rows x 1212 columns]

```
[11]: pred_model.correlation_dataframe(data, 0.3, 'A549').shape
```

```
[11]: (127, 3)
```

```
[12]: pred_model.correlation_dataframe(data, 0.5, 'A549')
```

```
[12]:
```

|      | molecular descriptor name | corr_value | absolute correlation value |
|------|---------------------------|------------|----------------------------|
| 226  | AMID_0                    | -0.557717  | 0.557717                   |
| 505  | EState_VSA5               | -0.534748  | 0.534748                   |
| 791  | MDE0-12                   | -0.555724  | 0.555724                   |
| 921  | SaasC                     | 0.513071   | 0.513071                   |
| 1091 | VSA_EState5               | 0.526082   | 0.526082                   |

```
[13]: pred_model.correlation_dataframe(data, 0.54, 'A549') # => these descriptors
      ↪ will be used to build models
```



```
[13]:      molecular descriptor name  corr_value  absolute correlation value
      226                      AMID_0    -0.557717                0.557717
      791                      MDEO-12   -0.555724                0.555724
```

## 1.2 MCF-7

```
[14]: data = load_prepared_data[list(load_prepared_data.columns)[0:-10]]
      data['MCF-7'] = load_prepared_data[load_prepared_data.columns[-4]]
      data.head()
```

```
[14]:      AATSOZ  AATSOare  AATSOd  AATSOdv  AATSOi  AATSOm  AATSOp  \
0  25.090909  6.046518  3.109091  6.662626  160.775045  99.075564  1.555512
1  24.448276  6.008422  3.051724  6.386973  161.021674  96.473315  1.538471
2  23.868852  5.974074  3.000000  6.138434  161.244045  94.127025  1.523105
3  23.868852  5.974074  3.032787  6.171220  161.244045  94.127025  1.523105
4  23.343750  5.942945  2.953125  5.913194  161.445569  92.000700  1.509180

      AATSOpe  AATSOs  AATSOse  ...  piPC10  piPC2  piPC3  piPC4  \
0  6.126680  3.435416  7.629859  ...  7.999655  4.266195  4.915408  5.516700
1  6.088791  3.330998  7.596891  ...  8.018726  4.280132  4.922714  5.520711
2  6.054630  3.236850  7.567166  ...  8.028799  4.293878  4.929967  5.524706
3  6.054630  3.257798  7.567166  ...  8.037440  4.307438  4.929967  5.524706
4  6.023670  3.151529  7.540228  ...  8.034892  4.307438  4.937168  5.528685

      piPC5  piPC6  piPC7  piPC8  piPC9  MCF-7
0  6.098566  6.595759  6.979116  7.337313  7.681445  7.987163
1  6.103048  6.601209  6.985613  7.349442  7.695531  7.920819
2  6.105281  6.603923  6.989306  7.353932  7.704023  7.913640
3  6.107510  6.606629  6.992068  7.361425  7.709420  7.946922
4  6.107510  6.605277  6.991148  7.356489  7.707175  7.032920

[5 rows x 1212 columns]
```

```
[15]: pred_model.correlation_dataframe(data, 0.3, 'MCF-7').shape
```

```
[15]: (135, 3)
```

```
[16]: pred_model.correlation_dataframe(data, 0.5, 'MCF-7')
```

```
[16]:      molecular descriptor name  corr_value  absolute correlation value
      226                      AMID_0    -0.520578                0.520578
      505                  EState_VSA5   -0.578904                0.578904
      506                  EState_VSA6    0.519794                0.519794
      791                      MDEO-12   -0.525441                0.525441
```

```
[17]: pred_model.correlation_dataframe(data, 0.525, 'MCF-7') # => these descriptors
      ↪ will be used to build models
```

```
[17]:      molecular descriptor name  corr_value  absolute correlation value
505              EState_VSA5    -0.578904              0.578904
791              MDEO-12     -0.525441              0.525441
```

### 1.3 LoVo

```
[18]: data = load_prepared_data[list(load_prepared_data.columns)[0:-10]]
data['LoVo'] = load_prepared_data[load_prepared_data.columns[-3]]
data.head()
```

```
[18]:      AATSOZ  AATSOare  AATSOd  AATSOdv  AATSOi  AATSOm  AATSOp  \
0  25.090909  6.046518  3.109091  6.662626  160.775045  99.075564  1.555512
1  24.448276  6.008422  3.051724  6.386973  161.021674  96.473315  1.538471
2  23.868852  5.974074  3.000000  6.138434  161.244045  94.127025  1.523105
3  23.868852  5.974074  3.032787  6.171220  161.244045  94.127025  1.523105
4  23.343750  5.942945  2.953125  5.913194  161.445569  92.000700  1.509180
```

```
      AATSOpe  AATSOs  AATSOse  ...  piPC10  piPC2  piPC3  piPC4  \
0  6.126680  3.435416  7.629859  ...  7.999655  4.266195  4.915408  5.516700
1  6.088791  3.330998  7.596891  ...  8.018726  4.280132  4.922714  5.520711
2  6.054630  3.236850  7.567166  ...  8.028799  4.293878  4.929967  5.524706
3  6.054630  3.257798  7.567166  ...  8.037440  4.307438  4.929967  5.524706
4  6.023670  3.151529  7.540228  ...  8.034892  4.307438  4.937168  5.528685
```

```
      piPC5  piPC6  piPC7  piPC8  piPC9  LoVo
0  6.098566  6.595759  6.979116  7.337313  7.681445  8.187087
1  6.103048  6.601209  6.985613  7.349442  7.695531  8.070581
2  6.105281  6.603923  6.989306  7.353932  7.704023  8.055517
3  6.107510  6.606629  6.992068  7.361425  7.709420  8.070581
4  6.107510  6.605277  6.991148  7.356489  7.707175  7.277366
```

[5 rows x 1212 columns]

```
[19]: pred_model.correlation_dataframe(data, 0.3, 'LoVo').shape
```

```
[19]: (83, 3)
```

```
[20]: pred_model.correlation_dataframe(data, 0.5, 'LoVo')
```

```
[20]:      molecular descriptor name  corr_value  absolute correlation value
226              AMID_0    -0.524157              0.524157
505              EState_VSA5    -0.579664              0.579664
791              MDEO-12    -0.558727              0.558727
851              NdssC     -0.506855              0.506855
1091             VSA_EState5     0.503578              0.503578
```

```
[21]: pred_model.correlation_dataframe(data, 0.55, 'LoVo') # => these descriptors
      ↪ will be used to build models
```

```
[21]:      molecular descriptor name  corr_value  absolute correlation value
505              EState_VSA5    -0.579664              0.579664
791              MDEO-12     -0.558727              0.558727
```

## 1.4 LoVo/DX

```
[22]: data = load_prepared_data[list(load_prepared_data.columns)[0:-10]]
data['LoVo/DX'] = load_prepared_data[load_prepared_data.columns[-2]]
data.head()
```

```
[22]:      AATS0Z  AATS0are  AATS0d  AATS0dv  AATS0i  AATS0m  AATS0p  \
0  25.090909  6.046518  3.109091  6.662626  160.775045  99.075564  1.555512
1  24.448276  6.008422  3.051724  6.386973  161.021674  96.473315  1.538471
2  23.868852  5.974074  3.000000  6.138434  161.244045  94.127025  1.523105
3  23.868852  5.974074  3.032787  6.171220  161.244045  94.127025  1.523105
4  23.343750  5.942945  2.953125  5.913194  161.445569  92.000700  1.509180

      AATS0pe  AATS0s  AATS0se  ...  piPC10  piPC2  piPC3  piPC4  \
0  6.126680  3.435416  7.629859  ...  7.999655  4.266195  4.915408  5.516700
1  6.088791  3.330998  7.596891  ...  8.018726  4.280132  4.922714  5.520711
2  6.054630  3.236850  7.567166  ...  8.028799  4.293878  4.929967  5.524706
3  6.054630  3.257798  7.567166  ...  8.037440  4.307438  4.929967  5.524706
4  6.023670  3.151529  7.540228  ...  8.034892  4.307438  4.937168  5.528685

      piPC5  piPC6  piPC7  piPC8  piPC9  LoVo/DX
0  6.098566  6.595759  6.979116  7.337313  7.681445  7.260428
1  6.103048  6.601209  6.985613  7.349442  7.695531  7.507240
2  6.105281  6.603923  6.989306  7.353932  7.704023  7.747147
3  6.107510  6.606629  6.992068  7.361425  7.709420  7.991400
4  6.107510  6.605277  6.991148  7.356489  7.707175  7.109020
```

[5 rows x 1212 columns]

```
[23]: print(data.shape)
data = data.dropna()
```

(120, 1212)

```
[24]: data.shape
```

(106, 1212)

```
[25]: pred_model.correlation_dataframe(data, 0.3, 'LoVo/DX').shape
```

(601, 3)

```
[26]: pred_model.correlation_dataframe(data, 0.5, 'LoVo/DX').shape
```

[26]: (50, 3)

```
[27]: pred_model.correlation_dataframe(data, 0.64, 'LoVo/DX') # => these descriptors
      ↪ will be used to build models
```

```
[27]:      molecular descriptor name  corr_value  absolute correlation value
556                GATS2c      0.652245          0.652245
851                NdssC     -0.647960          0.647960
881                RNCG      0.663041          0.663041
```

## 1.5 BALB/3T3

```
[28]: data = load_prepared_data[list(load_prepared_data.columns)[0:-10]]
      data['BALB/3T3'] = load_prepared_data[load_prepared_data.columns[-1]]
      data.head()
```

```
[28]:      AATS0Z  AATS0are  AATS0d  AATS0dv  AATS0i  AATS0m  AATS0p  \
0  25.090909  6.046518  3.109091  6.662626  160.775045  99.075564  1.555512
1  24.448276  6.008422  3.051724  6.386973  161.021674  96.473315  1.538471
2  23.868852  5.974074  3.000000  6.138434  161.244045  94.127025  1.523105
3  23.868852  5.974074  3.032787  6.171220  161.244045  94.127025  1.523105
4  23.343750  5.942945  2.953125  5.913194  161.445569  92.000700  1.509180

      AATS0pe  AATS0s  AATS0se  ...  piPC10  piPC2  piPC3  piPC4  \
0  6.126680  3.435416  7.629859  ...  7.999655  4.266195  4.915408  5.516700
1  6.088791  3.330998  7.596891  ...  8.018726  4.280132  4.922714  5.520711
2  6.054630  3.236850  7.567166  ...  8.028799  4.293878  4.929967  5.524706
3  6.054630  3.257798  7.567166  ...  8.037440  4.307438  4.929967  5.524706
4  6.023670  3.151529  7.540228  ...  8.034892  4.307438  4.937168  5.528685

      piPC5  piPC6  piPC7  piPC8  piPC9  BALB/3T3
0  6.098566  6.595759  6.979116  7.337313  7.681445  7.991400
1  6.103048  6.601209  6.985613  7.349442  7.695531  7.844664
2  6.105281  6.603923  6.989306  7.353932  7.704023  7.931814
3  6.107510  6.606629  6.992068  7.361425  7.709420  7.958607
4  6.107510  6.605277  6.991148  7.356489  7.707175  7.002614

[5 rows x 1212 columns]
```

```
[29]: pred_model.correlation_dataframe(data, 0.3, 'BALB/3T3').shape
```

[29]: (112, 3)

```
[30]: pred_model.correlation_dataframe(data, 0.5, 'BALB/3T3')
```

```
[30]:      molecular descriptor name  corr_value  absolute correlation value
226                AMID_0     -0.546843          0.546843
505                EState_VSA5    -0.588780          0.588780
```

|      |             |           |          |
|------|-------------|-----------|----------|
| 556  | GATS2c      | 0.511671  | 0.511671 |
| 791  | MDEO-12     | -0.582747 | 0.582747 |
| 847  | NdO         | -0.500462 | 0.500462 |
| 851  | NdssC       | -0.526783 | 0.526783 |
| 1091 | VSA_EState5 | 0.529677  | 0.529677 |

```
[31]: pred_model.correlation_dataframe(data, 0.58, 'BALB/3T3') # => these descriptors
      ↪ will be used to build models
```

```
[31]:      molecular descriptor name  corr_value  absolute correlation value
505      EState_VSA5      -0.588780      0.588780
791      MDEO-12      -0.582747      0.582747
```

# Notebook

January 18, 2024

## 1 File 15

```
[1]: import sys
from pathlib import Path
prediction_mode_path = Path("../module")
sys.path.append(prediction_mode_path.as_posix())
import models_creation as pred_model

import pandas as pd
import numpy as np

from sklearn.metrics import r2_score

import matplotlib.pyplot as plt
from sklearn.tree import plot_tree

from matplotlib import pyplot as plt

import joblib

import warnings
warnings.filterwarnings('ignore')
```

```
[2]: load_prepared_data = pd.read_excel('../Data/Kolchicyna_machine_learning.xlsx')
load_prepared_data = load_prepared_data.drop(columns=['Unnamed: 0'])

target = 'A549'

corr_low = 0.33
corr_high = 0.54

random_state = 15
```

```
[3]: load_prepared_data.head()
```

```
[3]:
```

|   | AATSOZ    | AATSOare | AATSOd   | AATSOdv  | AATSOi     | AATSOm    | AATSOp   | \ |
|---|-----------|----------|----------|----------|------------|-----------|----------|---|
| 0 | 25.090909 | 6.046518 | 3.109091 | 6.662626 | 160.775045 | 99.075564 | 1.555512 |   |
| 1 | 24.448276 | 6.008422 | 3.051724 | 6.386973 | 161.021674 | 96.473315 | 1.538471 |   |

|   |           |          |          |          |            |           |          |
|---|-----------|----------|----------|----------|------------|-----------|----------|
| 2 | 23.868852 | 5.974074 | 3.000000 | 6.138434 | 161.244045 | 94.127025 | 1.523105 |
| 3 | 23.868852 | 5.974074 | 3.032787 | 6.171220 | 161.244045 | 94.127025 | 1.523105 |
| 4 | 23.343750 | 5.942945 | 2.953125 | 5.913194 | 161.445569 | 92.000700 | 1.509180 |

|   | AATS0pe  | AATS0s   | AATS0se  | ... | A549_float | MCF-7_float | LoVo_float | \ |
|---|----------|----------|----------|-----|------------|-------------|------------|---|
| 0 | 6.126680 | 3.435416 | 7.629859 | ... | 10.8       | 10.3        | 6.5        |   |
| 1 | 6.088791 | 3.330998 | 7.596891 | ... | 11.6       | 12.0        | 8.5        |   |
| 2 | 6.054630 | 3.236850 | 7.567166 | ... | 10.9       | 12.2        | 8.8        |   |
| 3 | 6.054630 | 3.257798 | 7.567166 | ... | 10.5       | 11.3        | 8.5        |   |
| 4 | 6.023670 | 3.151529 | 7.540228 | ... | 89.5       | 92.7        | 52.8       |   |

|   | LoVo/DX_float | BALB/3T3_float | A549_float_transformed | \ |
|---|---------------|----------------|------------------------|---|
| 0 | 54.9          | 10.2           | 7.966576               |   |
| 1 | 31.1          | 14.3           | 7.935542               |   |
| 2 | 17.9          | 11.7           | 7.962574               |   |
| 3 | 10.2          | 11.0           | 7.978811               |   |
| 4 | 77.8          | 99.4           | 7.048177               |   |

|   | MCF-7_float_transformed | LoVo_float_transformed | LoVo/DX_float_transformed | \ |
|---|-------------------------|------------------------|---------------------------|---|
| 0 | 7.987163                | 8.187087               | 7.260428                  |   |
| 1 | 7.920819                | 8.070581               | 7.507240                  |   |
| 2 | 7.913640                | 8.055517               | 7.747147                  |   |
| 3 | 7.946922                | 8.070581               | 7.991400                  |   |
| 4 | 7.032920                | 7.277366               | 7.109020                  |   |

|   | BALB/3T3_float_transformed |
|---|----------------------------|
| 0 | 7.991400                   |
| 1 | 7.844664                   |
| 2 | 7.931814                   |
| 3 | 7.958607                   |
| 4 | 7.002614                   |

[5 rows x 1221 columns]

```
[4]: data = load_prepared_data[list(load_prepared_data.columns)[0:-10]]
data[target] = load_prepared_data[load_prepared_data.columns[-5]]
data.head()
```

|   | AATS0Z    | AATS0are | AATS0d   | AATS0dv  | AATS0i     | AATS0m    | AATS0p   | \ |
|---|-----------|----------|----------|----------|------------|-----------|----------|---|
| 0 | 25.090909 | 6.046518 | 3.109091 | 6.662626 | 160.775045 | 99.075564 | 1.555512 |   |
| 1 | 24.448276 | 6.008422 | 3.051724 | 6.386973 | 161.021674 | 96.473315 | 1.538471 |   |
| 2 | 23.868852 | 5.974074 | 3.000000 | 6.138434 | 161.244045 | 94.127025 | 1.523105 |   |
| 3 | 23.868852 | 5.974074 | 3.032787 | 6.171220 | 161.244045 | 94.127025 | 1.523105 |   |
| 4 | 23.343750 | 5.942945 | 2.953125 | 5.913194 | 161.445569 | 92.000700 | 1.509180 |   |

|   | AATS0pe  | AATS0s   | AATS0se  | ... | piPC10   | piPC2    | piPC3    | piPC4    | \ |
|---|----------|----------|----------|-----|----------|----------|----------|----------|---|
| 0 | 6.126680 | 3.435416 | 7.629859 | ... | 7.999655 | 4.266195 | 4.915408 | 5.516700 |   |

|   |          |          |          |     |          |          |          |          |
|---|----------|----------|----------|-----|----------|----------|----------|----------|
| 1 | 6.088791 | 3.330998 | 7.596891 | ... | 8.018726 | 4.280132 | 4.922714 | 5.520711 |
| 2 | 6.054630 | 3.236850 | 7.567166 | ... | 8.028799 | 4.293878 | 4.929967 | 5.524706 |
| 3 | 6.054630 | 3.257798 | 7.567166 | ... | 8.037440 | 4.307438 | 4.929967 | 5.524706 |
| 4 | 6.023670 | 3.151529 | 7.540228 | ... | 8.034892 | 4.307438 | 4.937168 | 5.528685 |

|   | piPC5    | piPC6    | piPC7    | piPC8    | piPC9    | A549     |
|---|----------|----------|----------|----------|----------|----------|
| 0 | 6.098566 | 6.595759 | 6.979116 | 7.337313 | 7.681445 | 7.966576 |
| 1 | 6.103048 | 6.601209 | 6.985613 | 7.349442 | 7.695531 | 7.935542 |
| 2 | 6.105281 | 6.603923 | 6.989306 | 7.353932 | 7.704023 | 7.962574 |
| 3 | 6.107510 | 6.606629 | 6.992068 | 7.361425 | 7.709420 | 7.978811 |
| 4 | 6.107510 | 6.605277 | 6.991148 | 7.356489 | 7.707175 | 7.048177 |

[5 rows x 1212 columns]

## 2 Multiple Linear regression (MLR)

```
[5]: without_standardization, train_r2_, test_r2_, hist1, hist2, target_column_name,
      ↪ training_data_RMSE, test_data_RMSE = pred_model.
      ↪ prepare_data_and_create_model(molecular_descriptors_df=data,
      ↪
      ↪ correlation_threshold=0.5,
      ↪
      ↪ standardization=False,
      ↪
      ↪ model_type='linear_model',
      ↪
      ↪ target_column_name = str(target),
      ↪
      ↪ random_state=random_state,
      ↪
      ↪ train_test_split_=True,
      ↪
      ↪ verbose=True)
```

I am not doing standardization...

|   | molecular descriptor name |            |
|---|---------------------------|------------|
| 0 | AATS0Z                    |            |
| 1 | AATS0are                  |            |
| 2 | AATS0d                    |            |
| 3 | AATS0dv                   |            |
| 4 | AATS0i                    |            |
|   | molecular descriptor name | corr_value |
| 0 | AATS0Z                    | -0.022797  |
| 1 | AATS0are                  | -0.139064  |
| 2 | AATS0d                    | 0.027592   |
| 3 | AATS0dv                   | -0.136049  |



|      |                           |            |                            |
|------|---------------------------|------------|----------------------------|
| 4    | AATSOi                    | 0.168958   |                            |
|      | molecular descriptor name | corr_value | absolute correlation value |
| 0    | AATSOZ                    | -0.022797  | 0.022797                   |
| 1    | AATSOare                  | -0.139064  | 0.139064                   |
| 2    | AATSOd                    | 0.027592   | 0.027592                   |
| 3    | AATSOdv                   | -0.136049  | 0.136049                   |
| 4    | AATSOi                    | 0.168958   | 0.168958                   |
|      | molecular descriptor name | corr_value | absolute correlation value |
| 226  | AMID_0                    | -0.557717  | 0.557717                   |
| 505  | EState_VSA5               | -0.534748  | 0.534748                   |
| 791  | MDEO-12                   | -0.555724  | 0.555724                   |
| 921  | SaasC                     | 0.513071   | 0.513071                   |
| 1091 | VSA_EState5               | 0.526082   | 0.526082                   |
|      | molecular descriptor name | corr_value | absolute correlation value |
| 226  | AMID_0                    | -0.557717  | 0.557717                   |
| 505  | EState_VSA5               | -0.534748  | 0.534748                   |
| 791  | MDEO-12                   | -0.555724  | 0.555724                   |
| 921  | SaasC                     | 0.513071   | 0.513071                   |
| 1091 | VSA_EState5               | 0.526082   | 0.526082                   |

The model used is: LinearReg..

Return the coefficient of determination of the prediction:

0.607684302836734

R<sup>2</sup> score: 0.45207360740354974

Correlation coefficient: 0.6723641925352284

Test data - unseen during training:

R<sup>2</sup> score: 0.607684302836734

Correlation coefficient: 0.7795410847650905

[7.84879747 6.24299325 7.37407883 8.0208511 7.9100943 8.19522969  
8.19061816 7.98447887 7.96950463 7.58923738 6.86384061 7.61628624  
7.4997649 7.87840731 8.14591404 8.10506343 6.33645764 5.85493895]  
102 7.920819  
38 6.019997  
8 5.996841  
109 7.886057  
11 7.962574  
51 7.886057  
88 8.075721  
21 7.325139  
82 7.978811  
98 7.481486  
58 7.677781  
64 8.537602  
74 8.142668  
103 8.397940  
91 8.958607  
43 7.823909  
25 4.886525  
30 6.009661

Name: A549, dtype: float64

Training Root Mean Square Error: 0.6910343772412224

Testing Root Mean Square Error: 0.6492799270001024

```
[6]: print(target_column_name+str('_transformed'))  
      print(hist1[target_column_name].hist())
```

A549\_transformed

AxesSubplot(0.125,0.11;0.775x0.77)

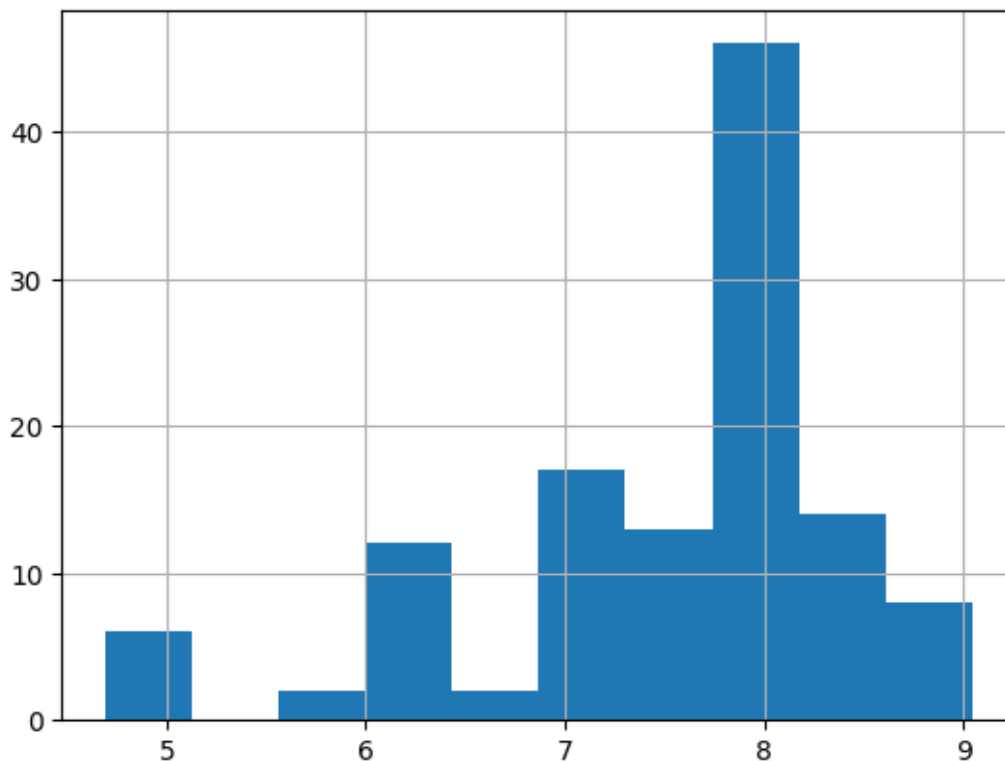

```
[7]: with_standardization, train_r2_, test_r2_, hist1, hist2, target_column_name,   
      ↪ training_data_RMSE, test_data_RMSE = pred_model.  
      ↪ prepare_data_and_create_model(molecular_descriptors_df=data,  
  
      ↪ correlation_threshold=0.50,  
  
      ↪ standardization=True,  
  
      ↪ model_type='linear_model',  
  
      ↪ target_column_name = target,
```

```

↪          random_state=random_state,
↪          train_test_split_=True,
↪          verbose=True)

```

I am doing standardization...

|   | molecular descriptor name |  |
|---|---------------------------|--|
| 0 | AATSOZ                    |  |
| 1 | AATSOare                  |  |
| 2 | AATSOd                    |  |
| 3 | AATSOdv                   |  |
| 4 | AATSOi                    |  |

  

|   | molecular descriptor name | corr_value |
|---|---------------------------|------------|
| 0 | AATSOZ                    | -0.022797  |
| 1 | AATSOare                  | -0.139064  |
| 2 | AATSOd                    | 0.027592   |
| 3 | AATSOdv                   | -0.136049  |
| 4 | AATSOi                    | 0.168958   |

  

|   | molecular descriptor name | corr_value | absolute correlation value |
|---|---------------------------|------------|----------------------------|
| 0 | AATSOZ                    | -0.022797  | 0.022797                   |
| 1 | AATSOare                  | -0.139064  | 0.139064                   |
| 2 | AATSOd                    | 0.027592   | 0.027592                   |
| 3 | AATSOdv                   | -0.136049  | 0.136049                   |
| 4 | AATSOi                    | 0.168958   | 0.168958                   |

  

|      | molecular descriptor name | corr_value | absolute correlation value |
|------|---------------------------|------------|----------------------------|
| 226  | AMID_0                    | -0.557717  | 0.557717                   |
| 505  | EState_VSA5               | -0.534748  | 0.534748                   |
| 791  | MDEO-12                   | -0.555724  | 0.555724                   |
| 921  | SaasC                     | 0.513071   | 0.513071                   |
| 1091 | VSA_EState5               | 0.526082   | 0.526082                   |

  

|      | molecular descriptor name | corr_value | absolute correlation value |
|------|---------------------------|------------|----------------------------|
| 226  | AMID_0                    | -0.557717  | 0.557717                   |
| 505  | EState_VSA5               | -0.534748  | 0.534748                   |
| 791  | MDEO-12                   | -0.555724  | 0.555724                   |
| 921  | SaasC                     | 0.513071   | 0.513071                   |
| 1091 | VSA_EState5               | 0.526082   | 0.526082                   |

The model used is: LinearReg..

Return the coefficient of determination of the prediction:

0.607684302836734

R<sup>2</sup> score: 0.45207360740354974

Correlation coefficient: 0.6723641925352284

Test data - unseen during training:

R<sup>2</sup> score: 0.607684302836734

Correlation coefficient: 0.7795410847650905

[7.84879747 6.24299325 7.37407883 8.0208511 7.9100943 8.19522969

```

8.19061816 7.98447887 7.96950463 7.58923738 6.86384061 7.61628624
7.4997649 7.87840731 8.14591404 8.10506343 6.33645764 5.85493895]
102    7.920819
38     6.019997
8      5.996841
109    7.886057
11     7.962574
51     7.886057
88     8.075721
21     7.325139
82     7.978811
98     7.481486
58     7.677781
64     8.537602
74     8.142668
103    8.397940
91     8.958607
43     7.823909
25     4.886525
30     6.009661
Name: A549, dtype: float64
Training Root Mean Square Error: 0.6910343772412224
Testing Root Mean Square Error: 0.6492799270001024

```

## 2.1 Search inside correlation space

```

[8]: step = 0.01
initial_step = corr_low
last_step = corr_high
first_list = [x / 100.0 for x in range(int(initial_step*100),
    ↪int(last_step*100), int(step*100))]
second_list = []
third_list = []
fourth_l = []
fifth_l = []
f_list = []
for i in first_list:
    without_standardization, train_r2, test_r2, _, h_, target_column_name,
    ↪training_data_RMSE, test_data_RMSE = pred_model.
    ↪prepare_data_and_create_model(molecular_descriptors_df = data,

    ↪
    ↪correlation_threshold = i,

    ↪
    ↪standardization = False,

    ↪
    ↪model_type = 'linear_model',

```

```

    ↪          target_column_name = target,
    ↪
    ↪          random_state=random_state,
    ↪
    ↪          train_test_split_ = True,
    ↪
    ↪          verbose = False)
second_list.append(train_r2)
third_list.append(test_r2)
fourth_l.append(training_data_RMSE)
fifth_l.append(test_data_RMSE)
f_list.append(len(h_))

```

```

[9]: df_without_standardization = pd.DataFrame(data=first_list,
    ↪columns=["Correlation threshold"])
df_without_standardization['Training data R^2 score'] = second_list
df_without_standardization['Test data R^2 score'] = third_list
df_without_standardization['Training RMSE'] = fourth_l
df_without_standardization['Test RMSE'] = fifth_l
df_without_standardization['Number of features'] = f_list

```

```

[10]: df_linear = df_without_standardization.copy()
df_without_standardization

```

```

[10]:
Correlation threshold  Training data R^2 score  Test data R^2 score  \
0                    0.33                0.990987            -3.202429
1                    0.34                0.956906             0.343203
2                    0.35                0.947797             0.394503
3                    0.36                0.930886             0.567737
4                    0.37                0.909806             0.499993
5                    0.38                0.865903             0.664443
6                    0.39                0.771356             0.749644
7                    0.40                0.666720             0.577809
8                    0.41                0.660500             0.648843
9                    0.42                0.603301             0.652730
10                   0.43                0.595478             0.638470
11                   0.44                0.579065             0.647024
12                   0.45                0.579065             0.647024
13                   0.46                0.555497             0.636815
14                   0.47                0.532003             0.636513
15                   0.48                0.503811             0.591147
16                   0.49                0.465449             0.603340
17                   0.50                0.452074             0.607684
18                   0.51                0.452074             0.607684
19                   0.52                0.452073             0.607536
20                   0.53                0.428089             0.626633

```

|    | Training RMSE | Test RMSE | Number of features |
|----|---------------|-----------|--------------------|
| 0  | 0.088631      | 2.125026  | 94                 |
| 1  | 0.193797      | 0.840098  | 79                 |
| 2  | 0.213297      | 0.806622  | 73                 |
| 3  | 0.245427      | 0.681535  | 68                 |
| 4  | 0.280367      | 0.732997  | 57                 |
| 5  | 0.341859      | 0.600478  | 47                 |
| 6  | 0.446394      | 0.518673  | 39                 |
| 7  | 0.538943      | 0.673548  | 31                 |
| 8  | 0.543949      | 0.614278  | 27                 |
| 9  | 0.587989      | 0.610869  | 22                 |
| 10 | 0.593758      | 0.623284  | 18                 |
| 11 | 0.605684      | 0.615866  | 16                 |
| 12 | 0.605684      | 0.615866  | 16                 |
| 13 | 0.622409      | 0.624709  | 13                 |
| 14 | 0.638646      | 0.624969  | 11                 |
| 15 | 0.657601      | 0.662823  | 8                  |
| 16 | 0.682548      | 0.652865  | 7                  |
| 17 | 0.691034      | 0.649280  | 5                  |
| 18 | 0.691034      | 0.649280  | 5                  |
| 19 | 0.691035      | 0.649403  | 4                  |
| 20 | 0.705997      | 0.633406  | 3                  |

```
[ ]:
```

## 2.2 Plots

```
[11]: plt.plot(df_without_standardization['Correlation threshold'],
↳df_without_standardization['Training data R^2 score'], label = "Training_
↳data R^2 score", marker='v')
plt.plot(df_without_standardization['Correlation threshold'],
↳df_without_standardization['Test data R^2 score'], label = "Test data R^2_
↳score", marker='D')
plt.legend()
plt.xlabel('Correlation threshold')
plt.ylabel('R^2 score')
plt.ylim([0, 1])
plt.show()
```

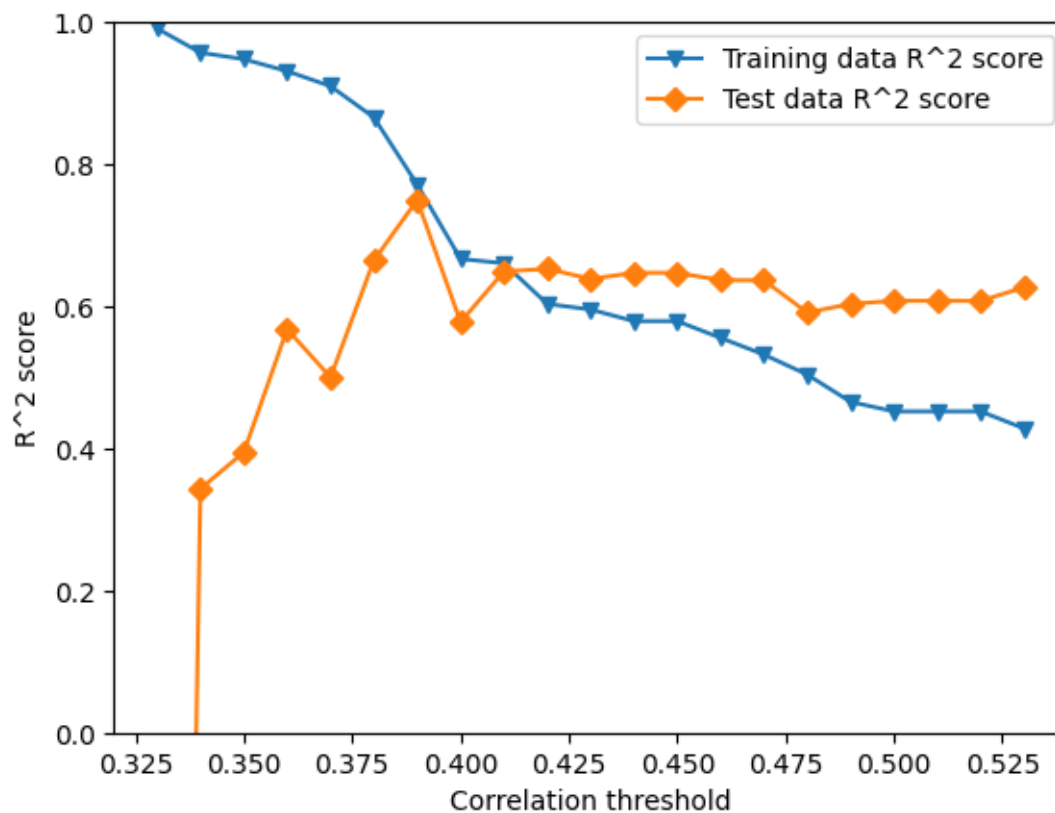

```
[12]: plt.plot(df_without_standardization['Correlation threshold'],
             df_without_standardization['Number of features'], label = "Number of
             features", marker='.')
plt.legend()
plt.xlabel('Correlation threshold')
plt.ylabel('Number of features')
plt.show()
```

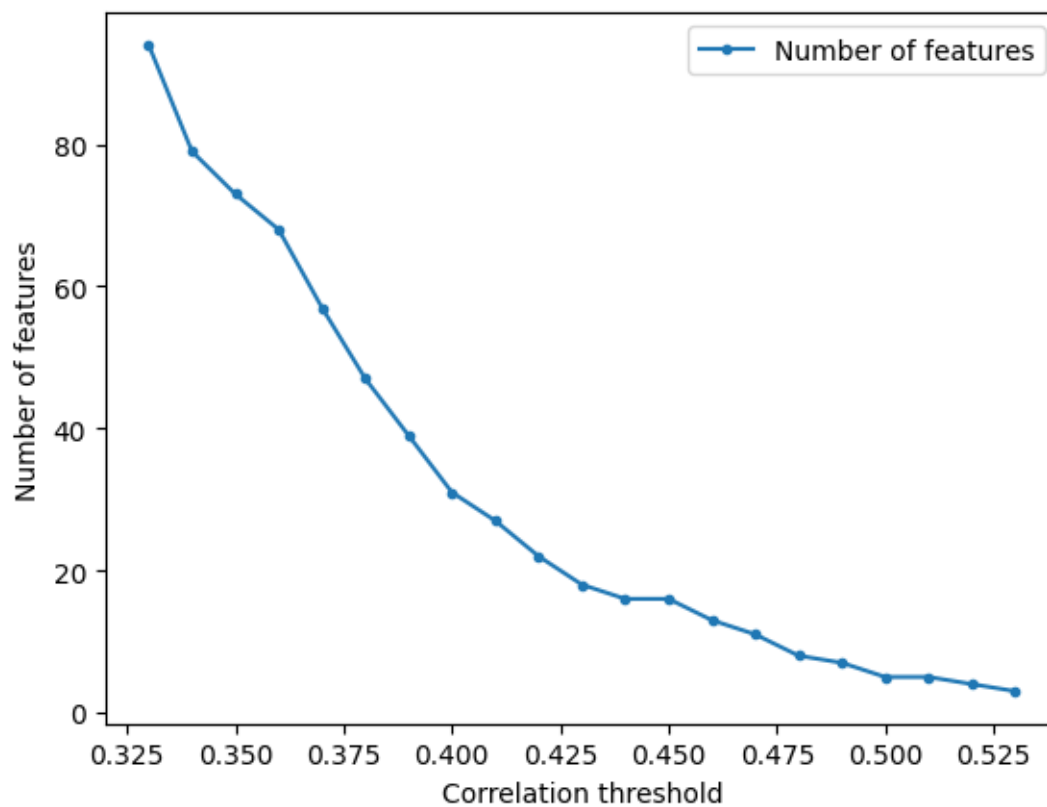

[ ]:

## 2.3 Decision Tree

```
[13]: without_standardization, train_r2_, test_r2_, hist1, hist2, target_column_name,
      ↪ training_data_RMSE, test_data_RMSE = pred_model.
      ↪ prepare_data_and_create_model(molecular_descriptors_df=data,
      ↪
      ↪         correlation_threshold=0.50,
      ↪
      ↪         standardization=False,
      ↪
      ↪         model_type='DecisionTreeRegressor',
      ↪
      ↪         max_depth=5,
      ↪
      ↪         target_column_name = target,
      ↪
      ↪         random_state=random_state,
```



```

↪          train_test_split_=True,
↪          verbose=True)

```

I am not doing standardization...

|   | molecular descriptor name | corr_value | absolute correlation value |
|---|---------------------------|------------|----------------------------|
| 0 | AATSOZ                    | -0.022797  | 0.022797                   |
| 1 | AATSOare                  | -0.139064  | 0.139064                   |
| 2 | AATSOd                    | 0.027592   | 0.027592                   |
| 3 | AATSOdv                   | -0.136049  | 0.136049                   |
| 4 | AATSOi                    | 0.168958   | 0.168958                   |

  

|      | molecular descriptor name | corr_value | absolute correlation value |
|------|---------------------------|------------|----------------------------|
| 226  | AMID_0                    | -0.557717  | 0.557717                   |
| 505  | EState_VSA5               | -0.534748  | 0.534748                   |
| 791  | MDEO-12                   | -0.555724  | 0.555724                   |
| 921  | SaasC                     | 0.513071   | 0.513071                   |
| 1091 | VSA_EState5               | 0.526082   | 0.526082                   |

The model used is: DecisionTree...

Return the coefficient of determination of the prediction:

0.4511327118987092

R<sup>2</sup> score: 0.9133233269283261

Correlation coefficient: 0.9556795105726219

Test data - unseen during training:

R<sup>2</sup> score: 0.4511327118987092

Correlation coefficient: 0.6716641362308317

[8.18943869 6.01979892 7.04240039 7.95366066 7.95366066 7.71707609  
7.95366066 7.08704364 7.95366066 8.68324418 8.68324418 8.18943869  
8.18943869 8.18943869 7.08704364 7.95366066 6.31695296 4.93372809]  
102 7.920819

```
38      6.019997
8       5.996841
109     7.886057
11      7.962574
51      7.886057
88      8.075721
21      7.325139
82      7.978811
98      7.481486
58      7.677781
64      8.537602
74      8.142668
103     8.397940
91      8.958607
43      7.823909
25      4.886525
30      6.009661
```

```
Name: A549, dtype: float64
```

```
Training Root Mean Square Error: 0.2748461511342915
```

```
Testing Root Mean Square Error: 0.7679762825865003
```

```
[14]: print(target_column_name+str('_transformed'))
      print(hist1[target_column_name].hist())
```

```
A549_transformed
```

```
AxesSubplot(0.125,0.11;0.775x0.77)
```

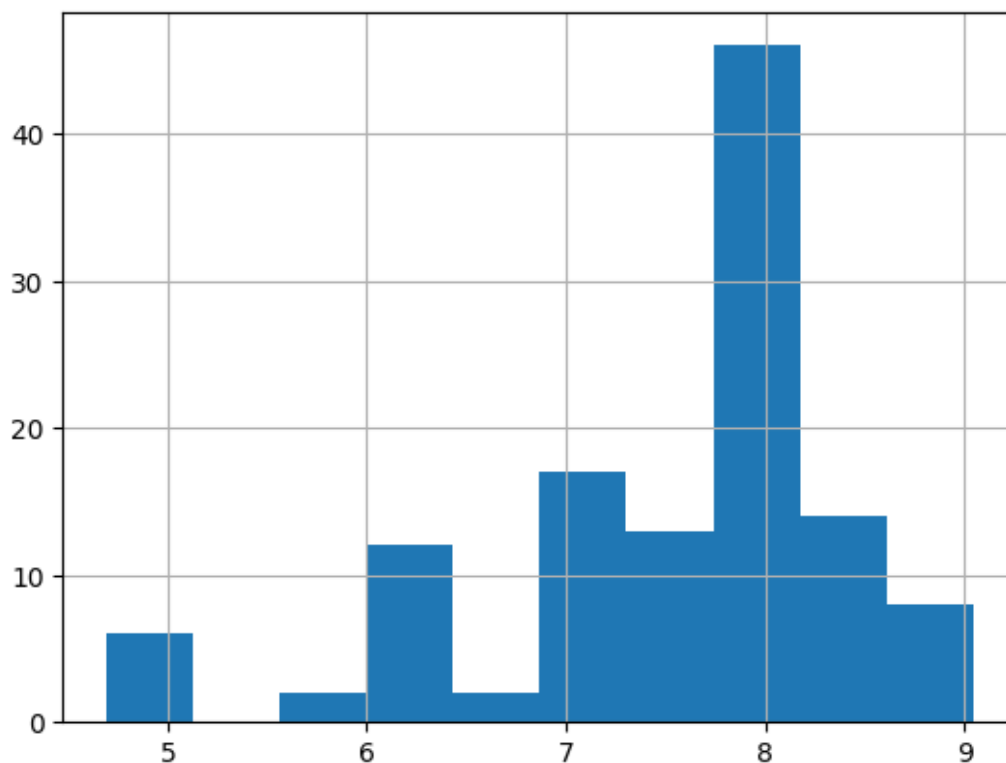

```
[15]: with_standardization, train_r2_, test_r2_, hist1, hist2, target_column_name,
      ↪ training_data_RMSE, test_data_RMSE = pred_model.
      ↪ prepare_data_and_create_model(molecular_descriptors_df=data,
      ↪
      ↪         correlation_threshold=0.50,
      ↪
      ↪         standardization=True,
      ↪
      ↪         model_type='DecisionTreeRegressor',
      ↪
      ↪         max_depth=5,
      ↪
      ↪         target_column_name = target,
      ↪
      ↪         random_state=random_state,
      ↪
      ↪         train_test_split_=True,
      ↪
      ↪         verbose=True)
```

I am doing standardization...  
molecular descriptor name

|      |                           |            |                            |
|------|---------------------------|------------|----------------------------|
| 0    | AATSOZ                    |            |                            |
| 1    | AATSOare                  |            |                            |
| 2    | AATSOd                    |            |                            |
| 3    | AATSOdv                   |            |                            |
| 4    | AATSOi                    |            |                            |
|      | molecular descriptor name | corr_value |                            |
| 0    | AATSOZ                    | -0.022797  |                            |
| 1    | AATSOare                  | -0.139064  |                            |
| 2    | AATSOd                    | 0.027592   |                            |
| 3    | AATSOdv                   | -0.136049  |                            |
| 4    | AATSOi                    | 0.168958   |                            |
|      | molecular descriptor name | corr_value | absolute correlation value |
| 0    | AATSOZ                    | -0.022797  | 0.022797                   |
| 1    | AATSOare                  | -0.139064  | 0.139064                   |
| 2    | AATSOd                    | 0.027592   | 0.027592                   |
| 3    | AATSOdv                   | -0.136049  | 0.136049                   |
| 4    | AATSOi                    | 0.168958   | 0.168958                   |
|      | molecular descriptor name | corr_value | absolute correlation value |
| 226  | AMID_0                    | -0.557717  | 0.557717                   |
| 505  | EState_VSA5               | -0.534748  | 0.534748                   |
| 791  | MDEO-12                   | -0.555724  | 0.555724                   |
| 921  | SaasC                     | 0.513071   | 0.513071                   |
| 1091 | VSA_EState5               | 0.526082   | 0.526082                   |
|      | molecular descriptor name | corr_value | absolute correlation value |
| 226  | AMID_0                    | -0.557717  | 0.557717                   |
| 505  | EState_VSA5               | -0.534748  | 0.534748                   |
| 791  | MDEO-12                   | -0.555724  | 0.555724                   |
| 921  | SaasC                     | 0.513071   | 0.513071                   |
| 1091 | VSA_EState5               | 0.526082   | 0.526082                   |

The model used is: DecisionTree...

Return the coefficient of determination of the prediction:  
0.4511327118987092

R<sup>2</sup> score: 0.9133233269283261

Correlation coefficient: 0.9556795105726219

Test data - unseen during training:  
R<sup>2</sup> score: 0.4511327118987092

Correlation coefficient: 0.6716641362308317

[8.18943869 6.01979892 7.04240039 7.95366066 7.95366066 7.71707609  
7.95366066 7.08704364 7.95366066 8.68324418 8.68324418 8.18943869  
8.18943869 8.18943869 7.08704364 7.95366066 6.31695296 4.93372809]  
102 7.920819  
38 6.019997  
8 5.996841  
109 7.886057  
11 7.962574  
51 7.886057  
88 8.075721  
21 7.325139

```

82      7.978811
98      7.481486
58      7.677781
64      8.537602
74      8.142668
103     8.397940
91      8.958607
43      7.823909
25      4.886525
30      6.009661

```

Name: A549, dtype: float64

Training Root Mean Square Error: 0.2748461511342915

Testing Root Mean Square Error: 0.7679762825865003

## 2.4 Search inside correlation space

```

[16]: step = 0.01
      initial_step = corr_low
      last_step = corr_high
      first_list = [x / 100.0 for x in range(int(initial_step*100),
      ↪int(last_step*100), int(step*100))]
      max_depth = [range(2, 30, 1)]
      corr_th = []
      second_list = []
      third_list = []
      fourth_l = []
      fifth_l = []
      f_list = []
      fif_list = []
      for i in first_list:
          for depth in max_depth[0]:

              without_standardization, train_r2, test_r2, _, h_, target_column_name,
              ↪training_data_RMSE, test_data_RMSE = pred_model.
              ↪prepare_data_and_create_model(molecular_descriptors_df=data,

              ↪correlation_threshold=i,

              ↪standardization=False,

              ↪model_type='DecisionTreeRegressor',

              ↪max_depth=depth,

              ↪target_column_name = target,

              ↪random_state=random_state,

```

```

↪          train_test_split_=True,
↪          verbose=False)
    corr_th.append(i)
    second_list.append(train_r2)
    third_list.append(test_r2)
    fourth_l.append(training_data_RMSE)
    fifth_l.append(test_data_RMSE)
    f_list.append(len(h_))
    fif_list.append(depth)

```

```

[17]: df_without_standardization = pd.DataFrame(data=corr_th, columns=["Correlation_
↪threshold"])
df_without_standardization['Training data R^2 score'] = second_list
df_without_standardization['Test data R^2 score'] = third_list
df_without_standardization['Training RMSE'] = fourth_l
df_without_standardization['Test RMSE'] = fifth_l
df_without_standardization['Number of features'] = f_list
df_without_standardization['Depth number'] = fif_list

```

```

[18]: df_decision_tree = df_without_standardization.copy()
#df_without_standardization.to_excel('../Data/
↪A549_Decision_tree_rs_'+str(random_state)+'.xlsx')

```

## 2.5 Plots

```
[19]: corre_list = [x / 100.0 for x in range(int(initial_step*100),
    ↪ int(last_step*100), int(0.01*100))]
for element in corre_list:
    element_ =
    ↪ df_without_standardization[df_without_standardization['Correlation_
    ↪ threshold'] == float(element)]
    plt.plot(element_['Depth number'], element_['Training data R^2 score'],
    ↪ label = "Training data R^2 score", marker='v')
    plt.plot(element_['Depth number'], element_['Test data R^2 score'], label =
    ↪ "Test data R^2 score", marker='D')
    plt.legend()
    plt.xlabel('Depth number -> correlation threshold: '+str(element)+'.'
    ↪ Number of features: '+str(element_['Number of features'].iloc[0]),
    ↪ fontweight='bold')
    plt.xlim(max(element_['Depth number'])+1, min(element_['Depth number'])-1)
    plt.ylabel('R^2 score')
    plt.ylim([0, 1])
    plt.rc('grid', linestyle="-. ", color='black')
    plt.grid(True)
    plt.show()
```

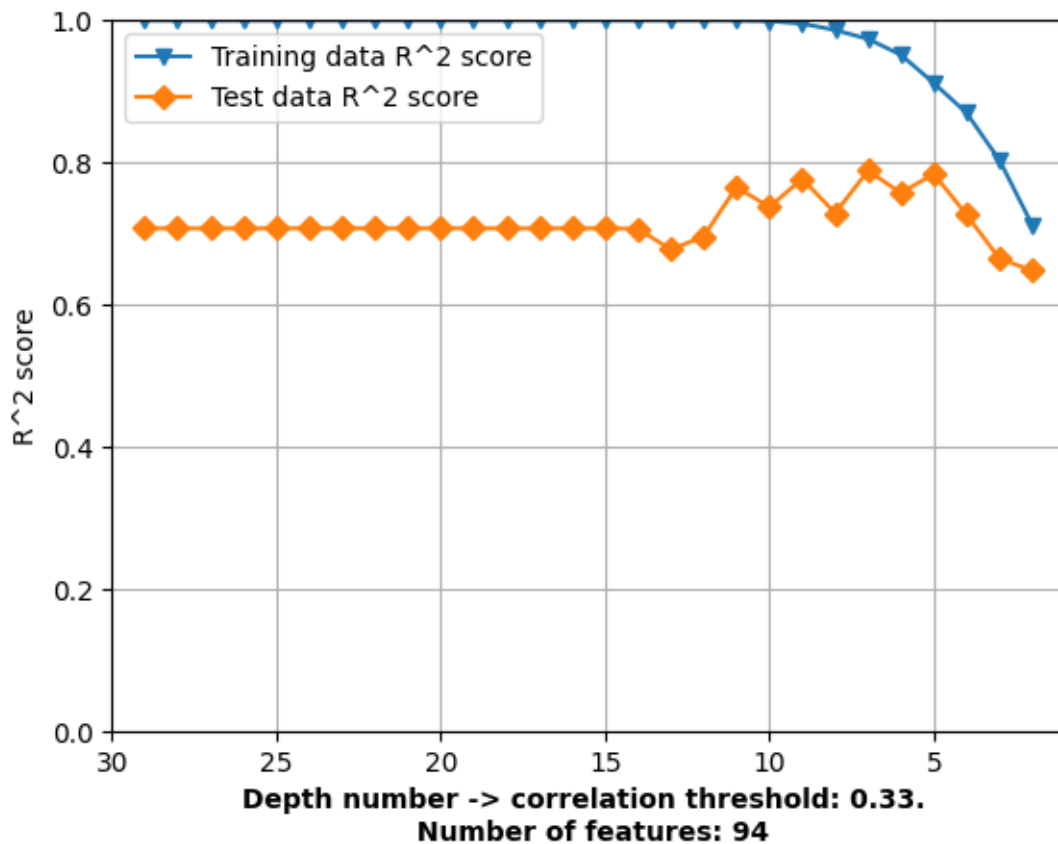

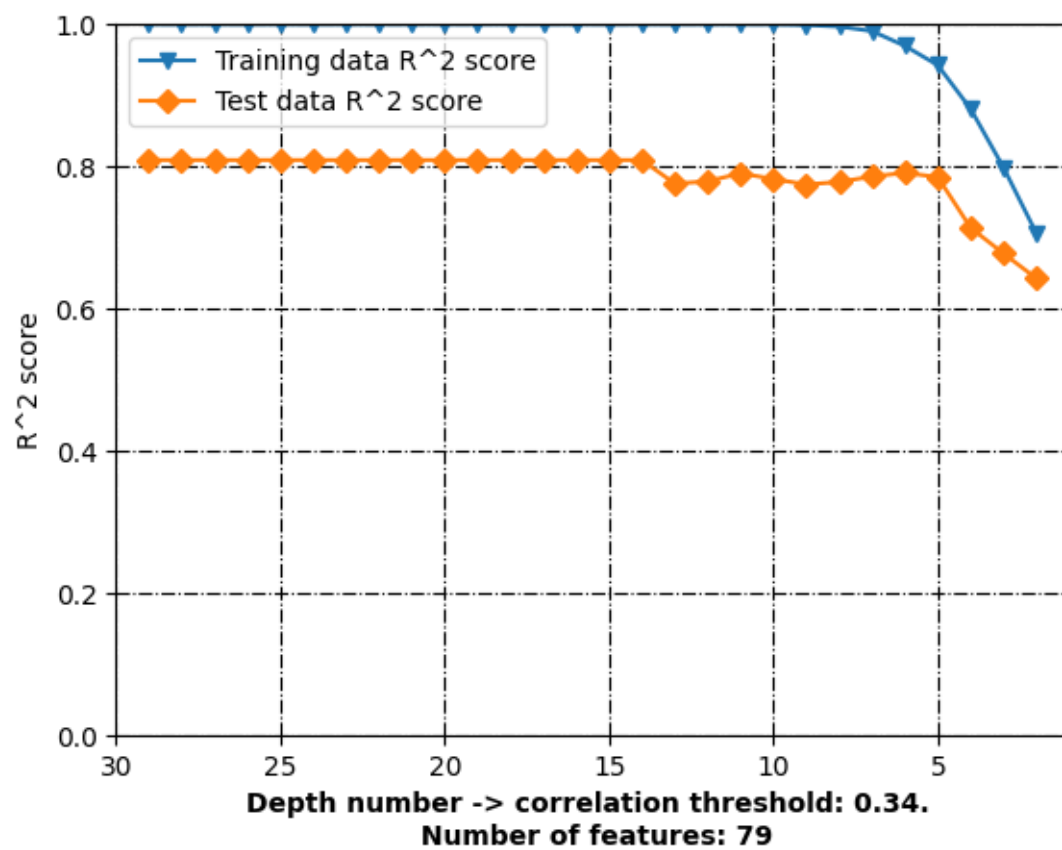



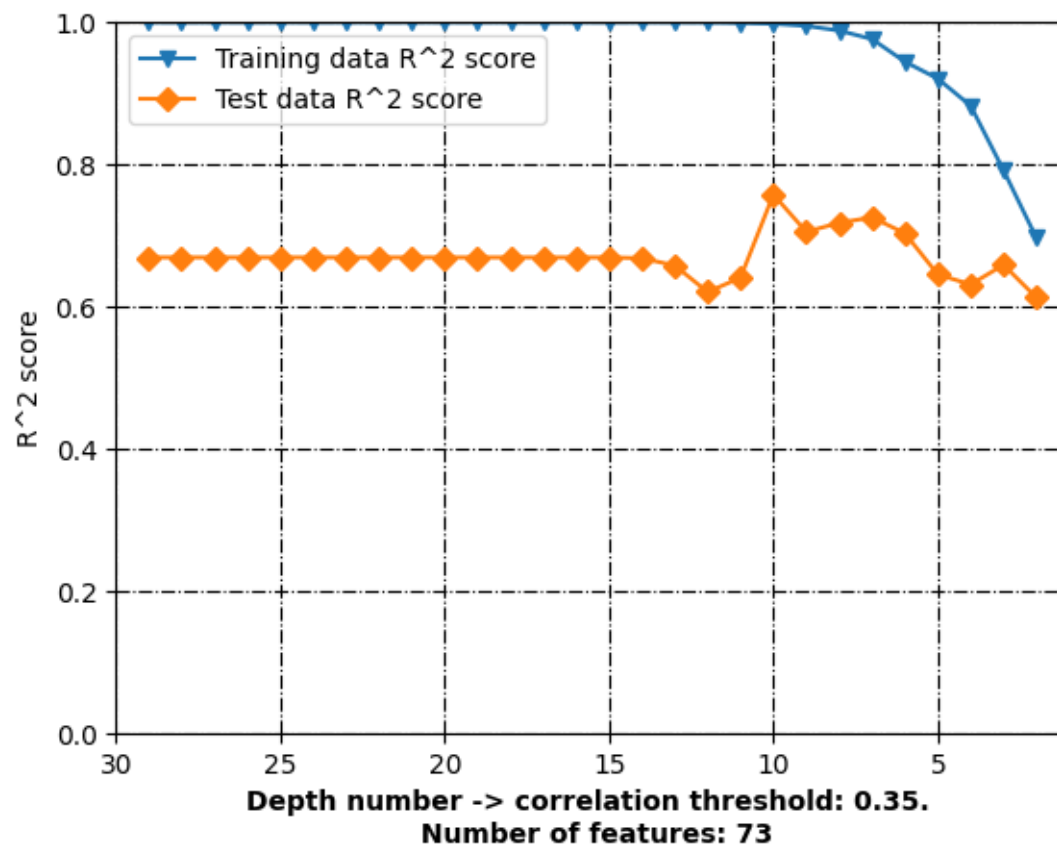

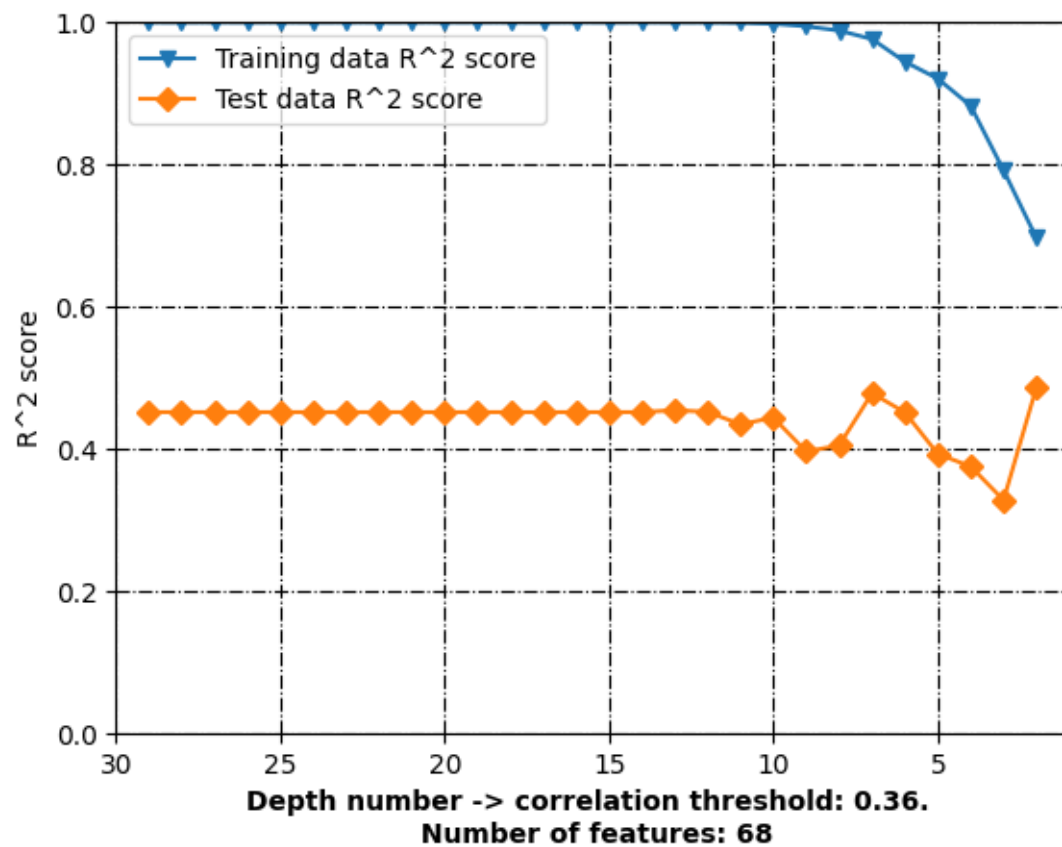

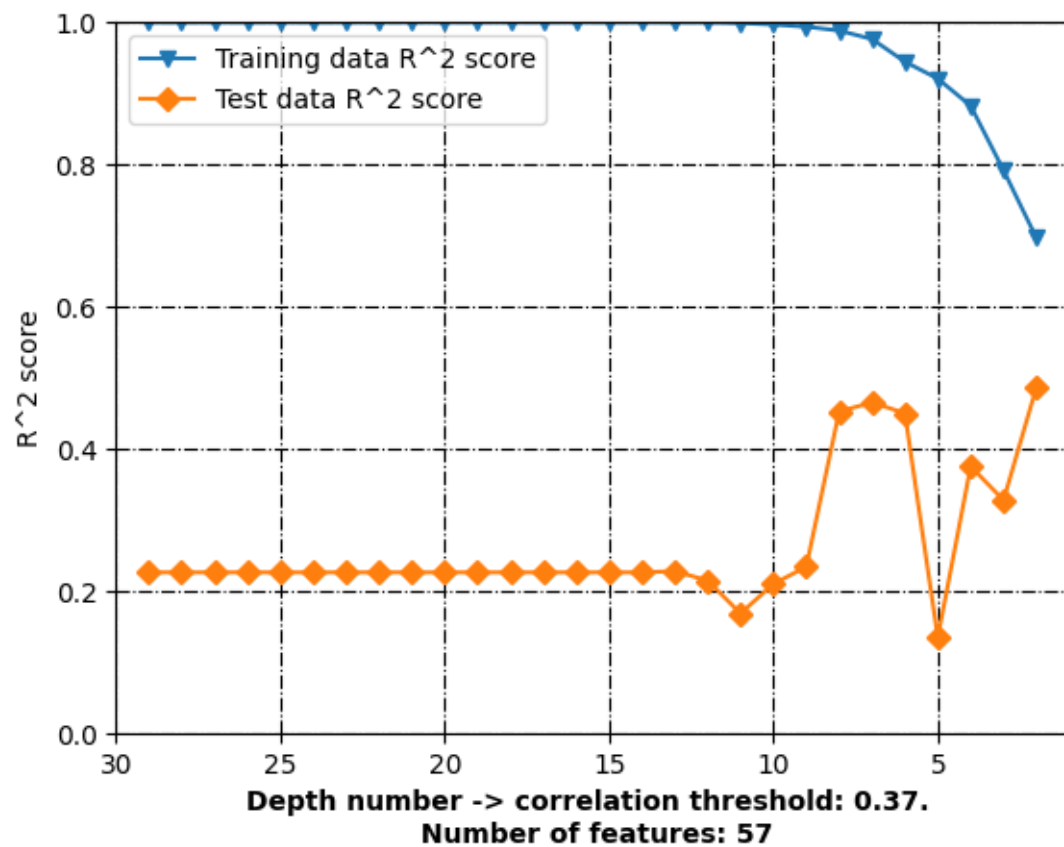

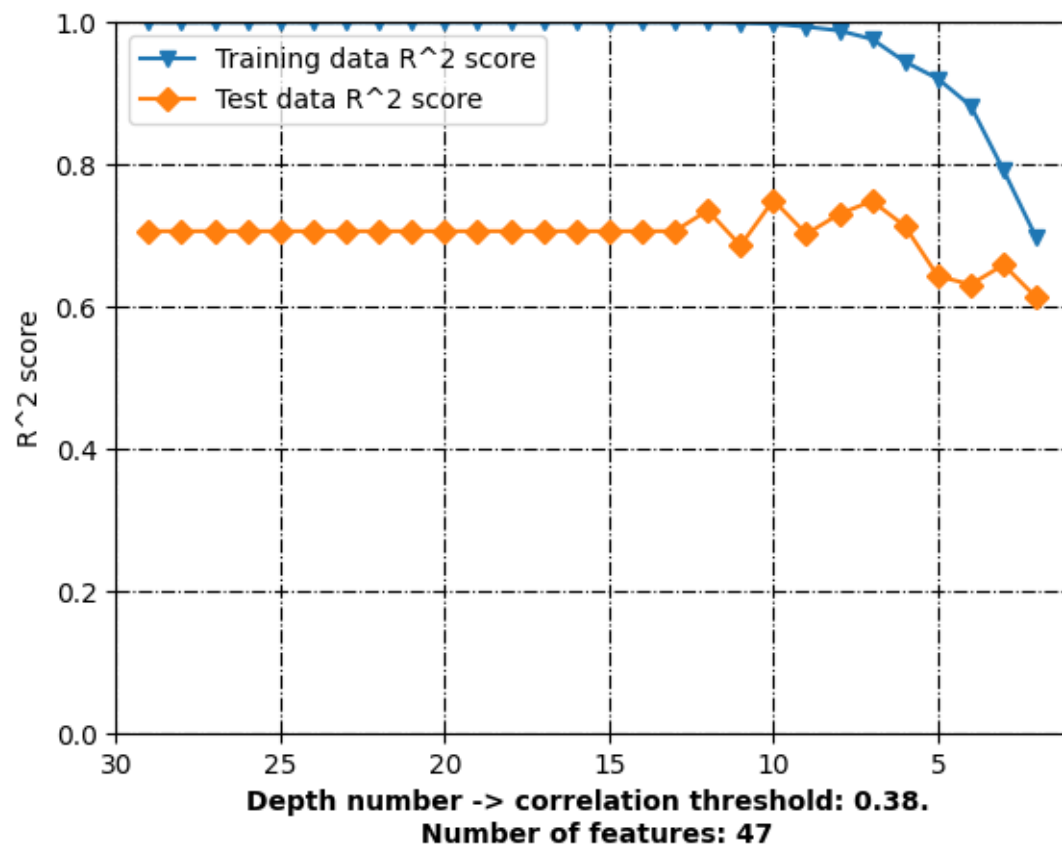

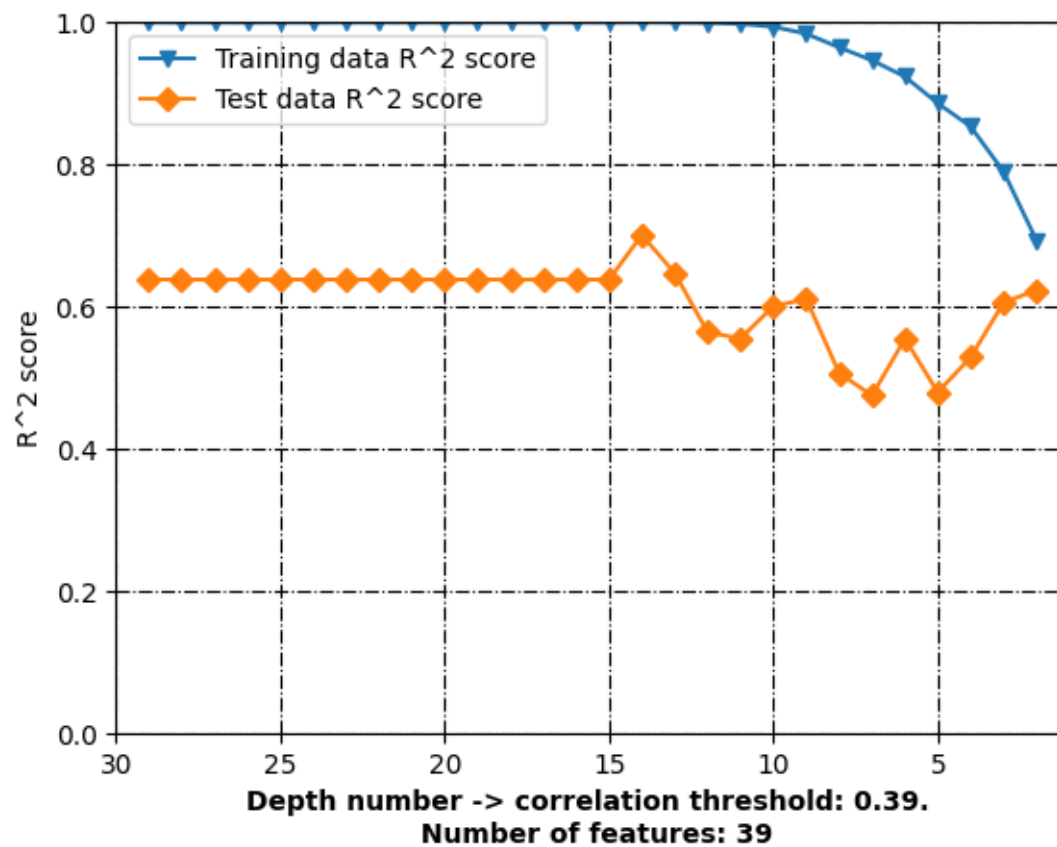

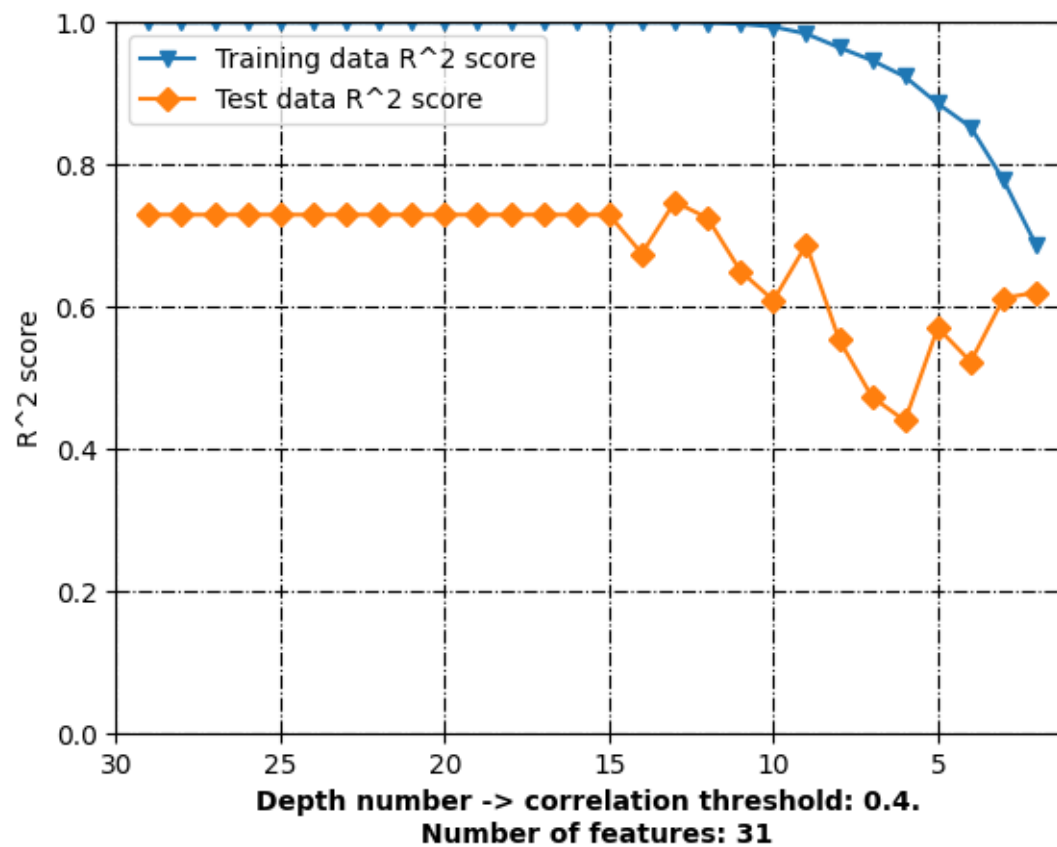

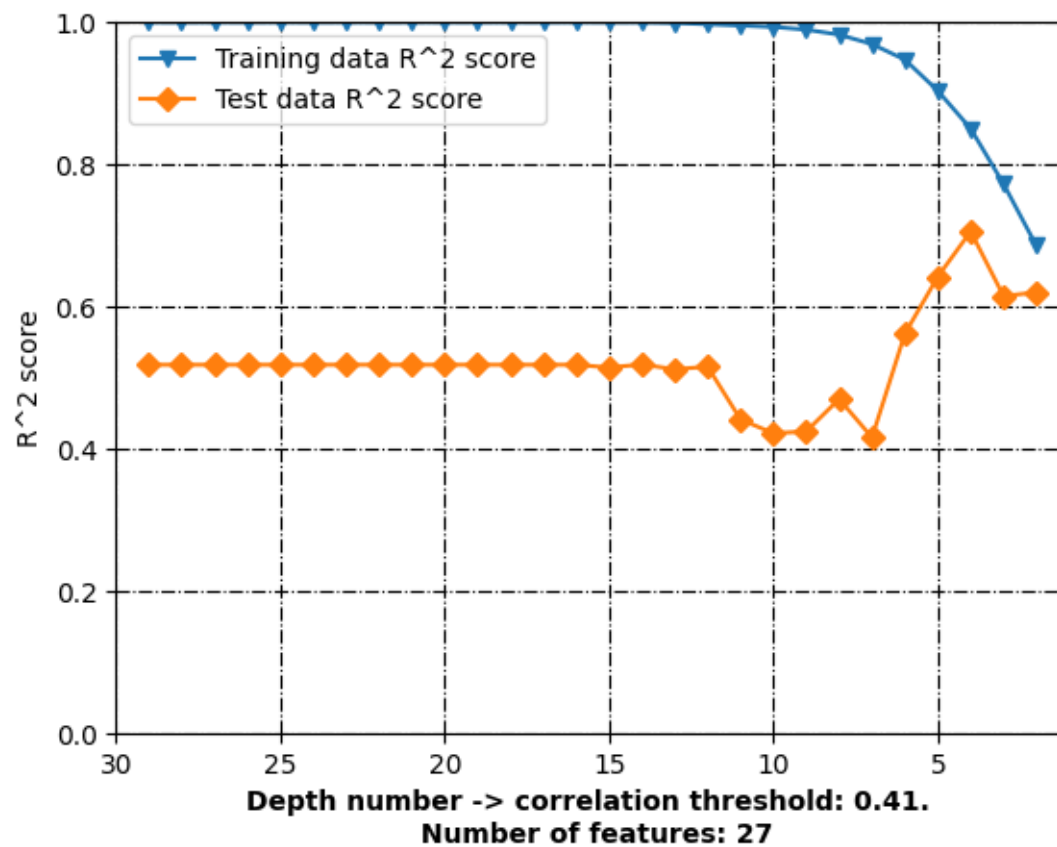

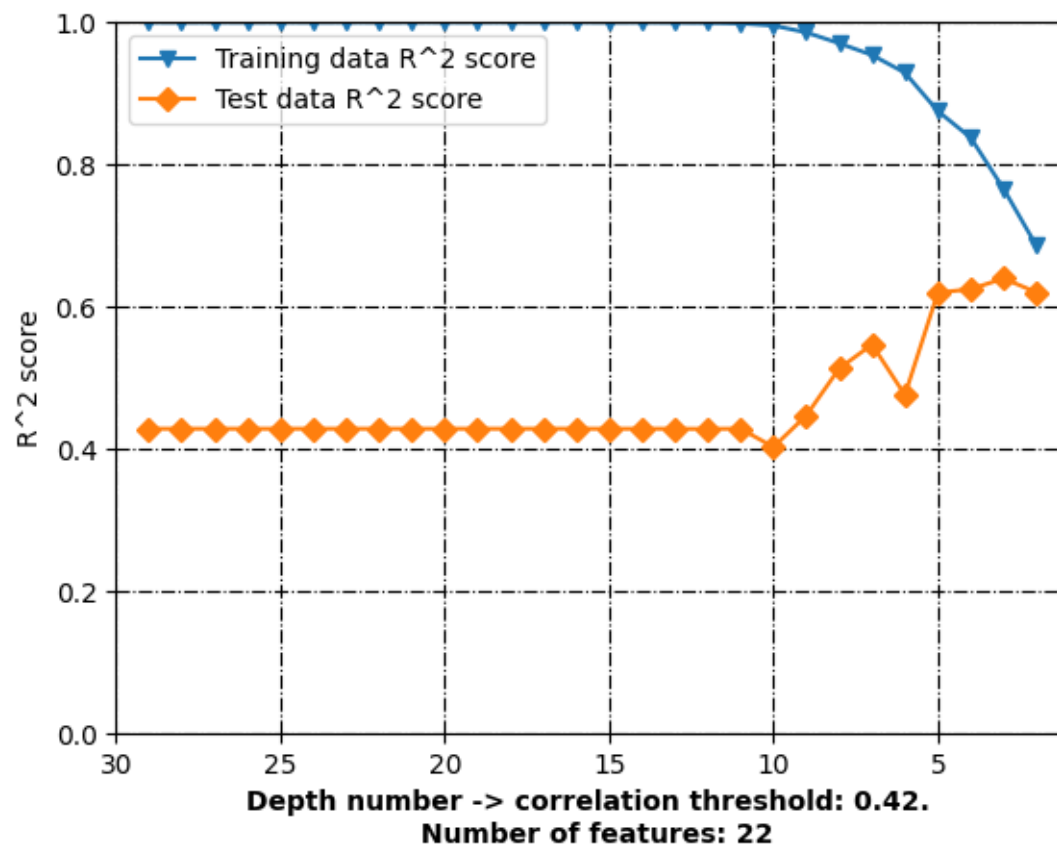



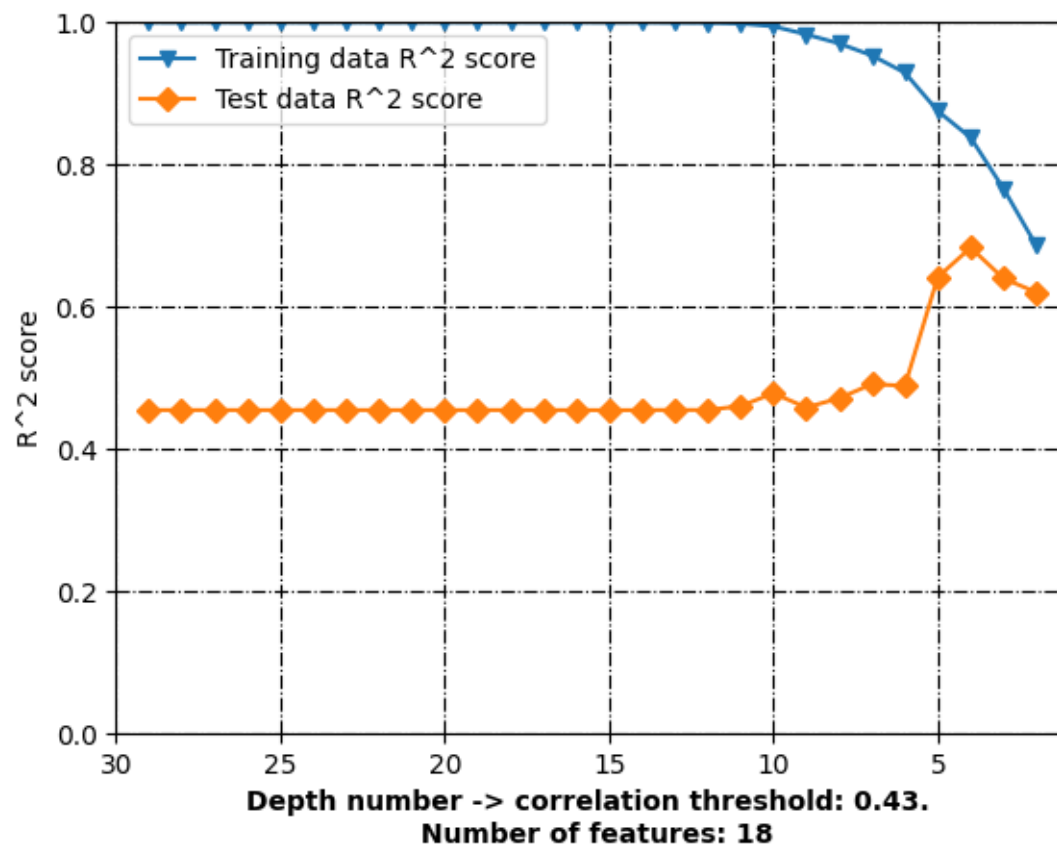

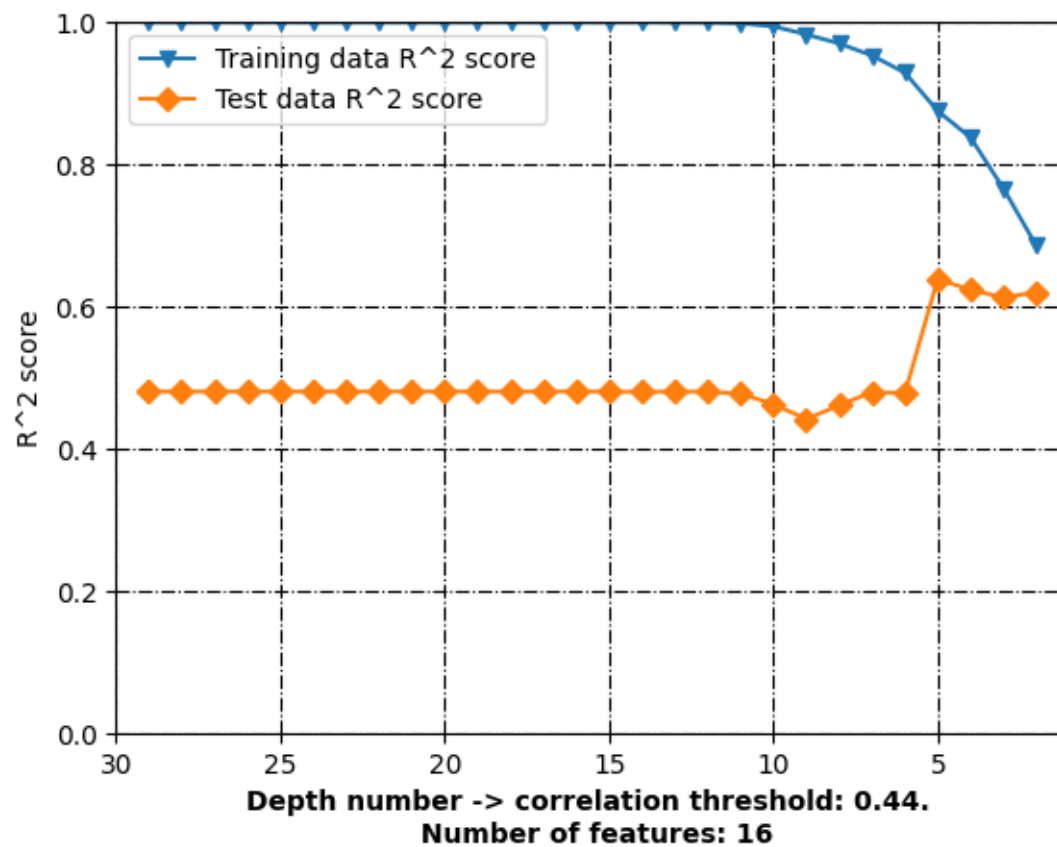

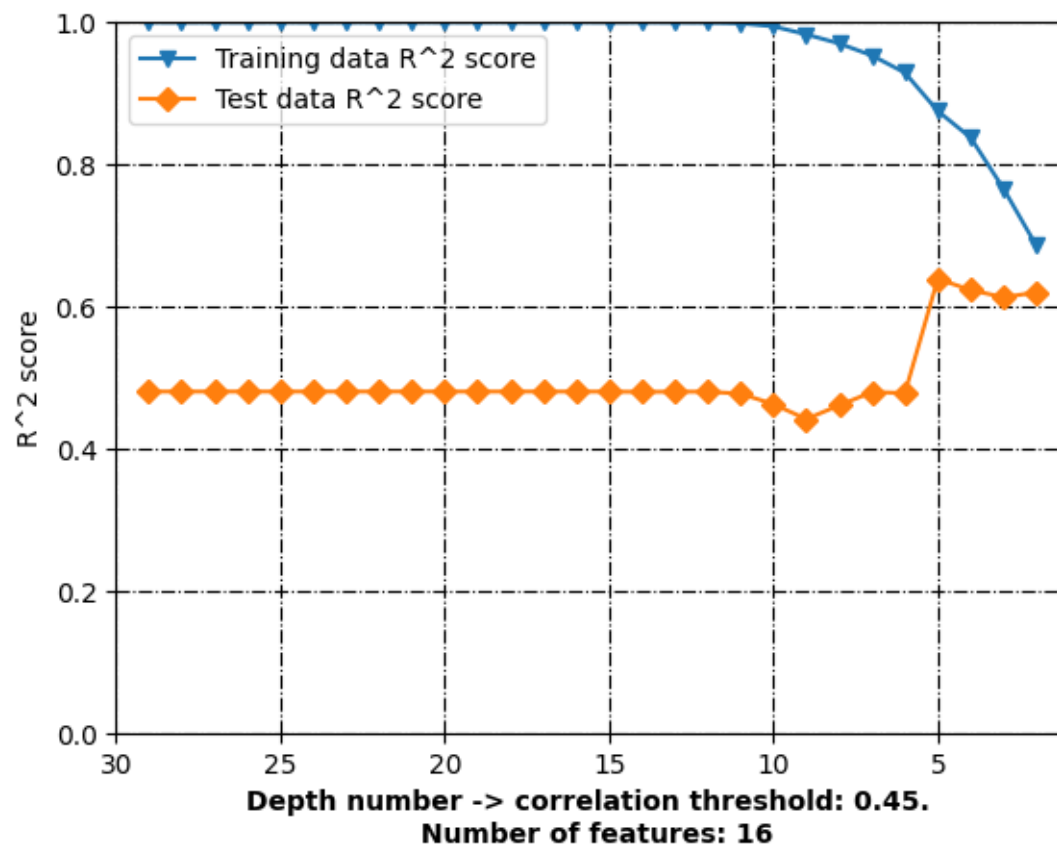

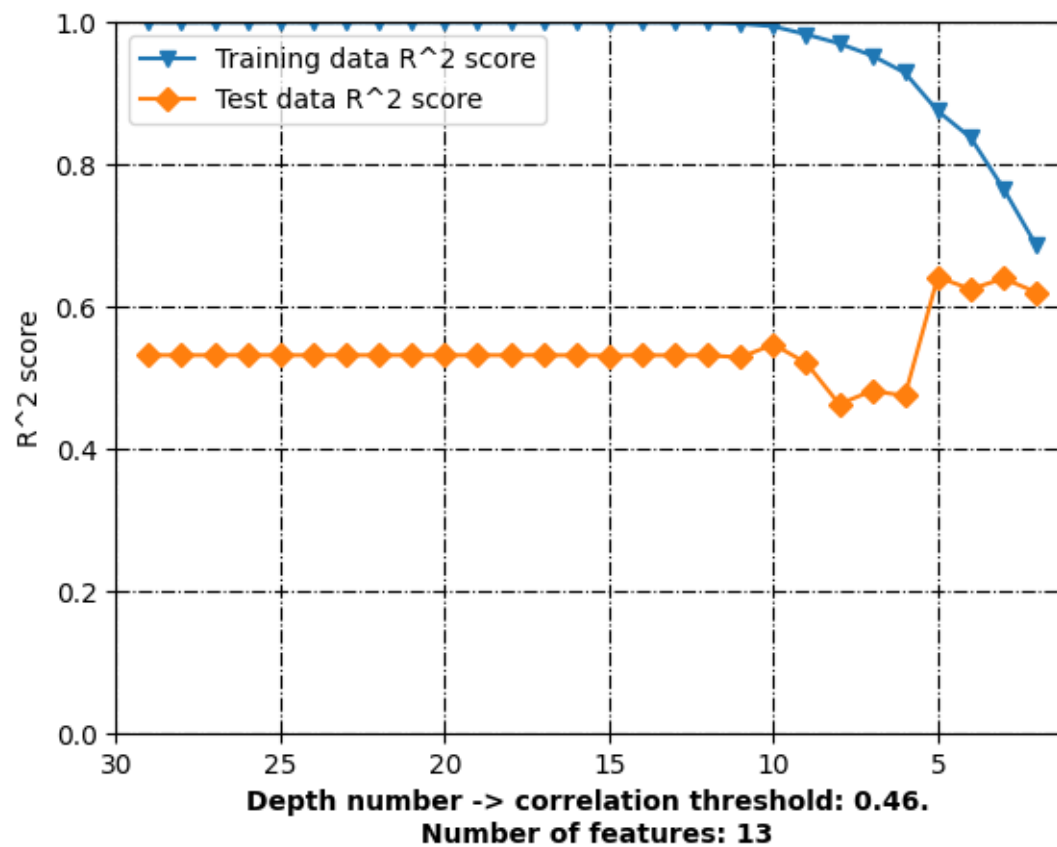

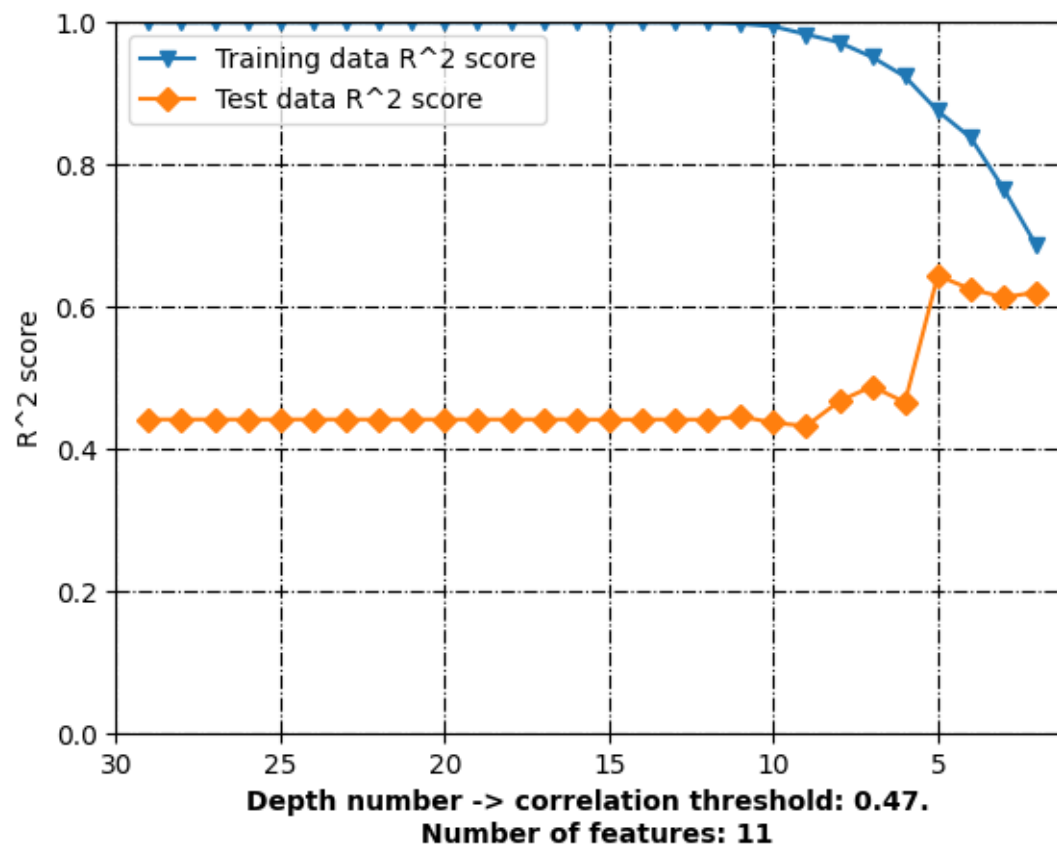

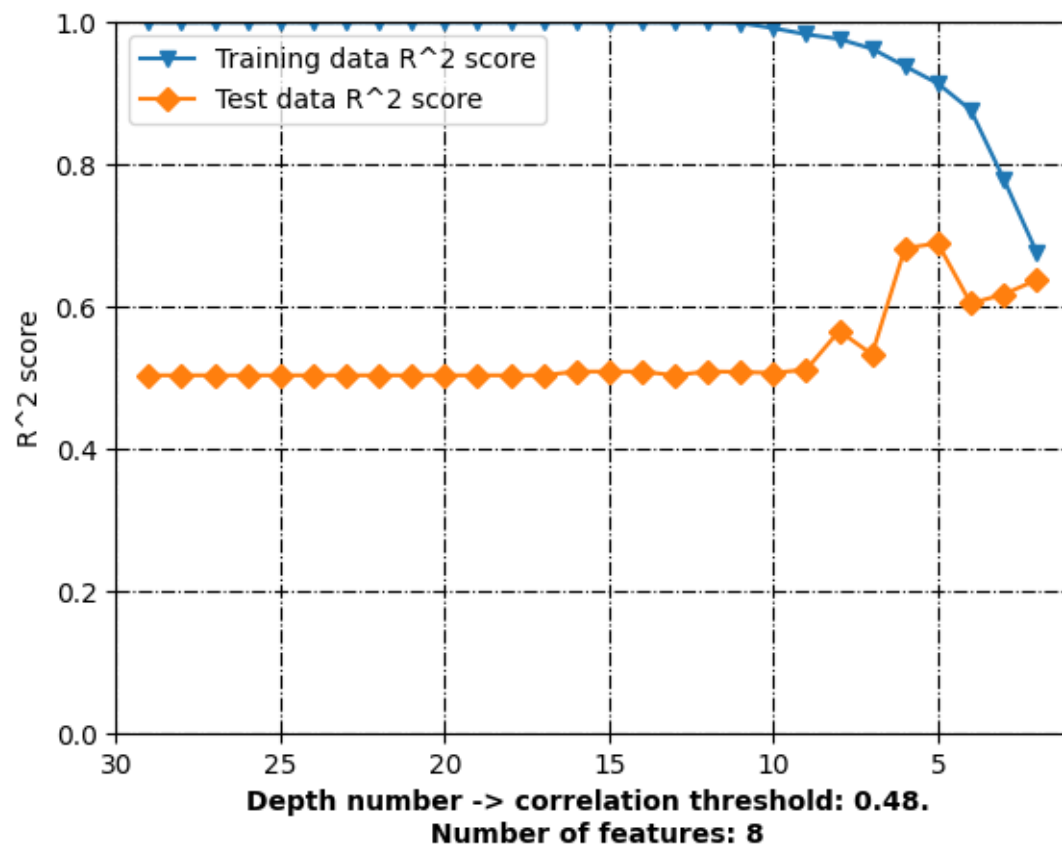

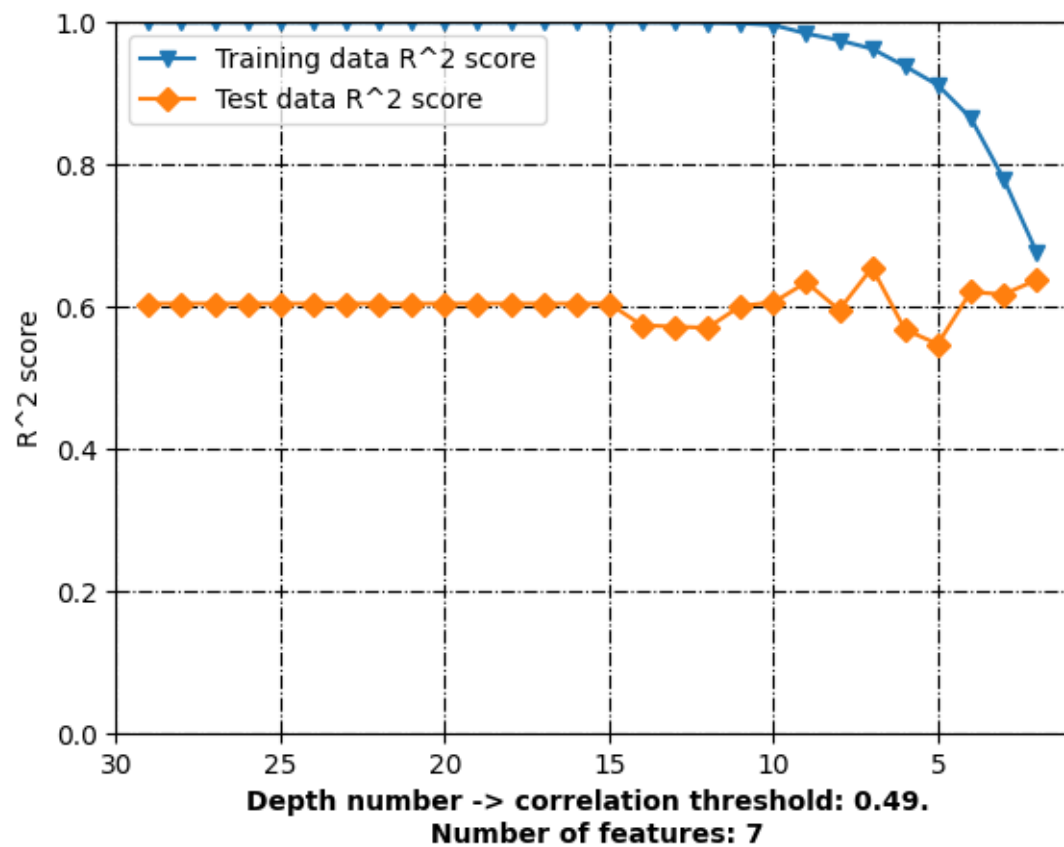

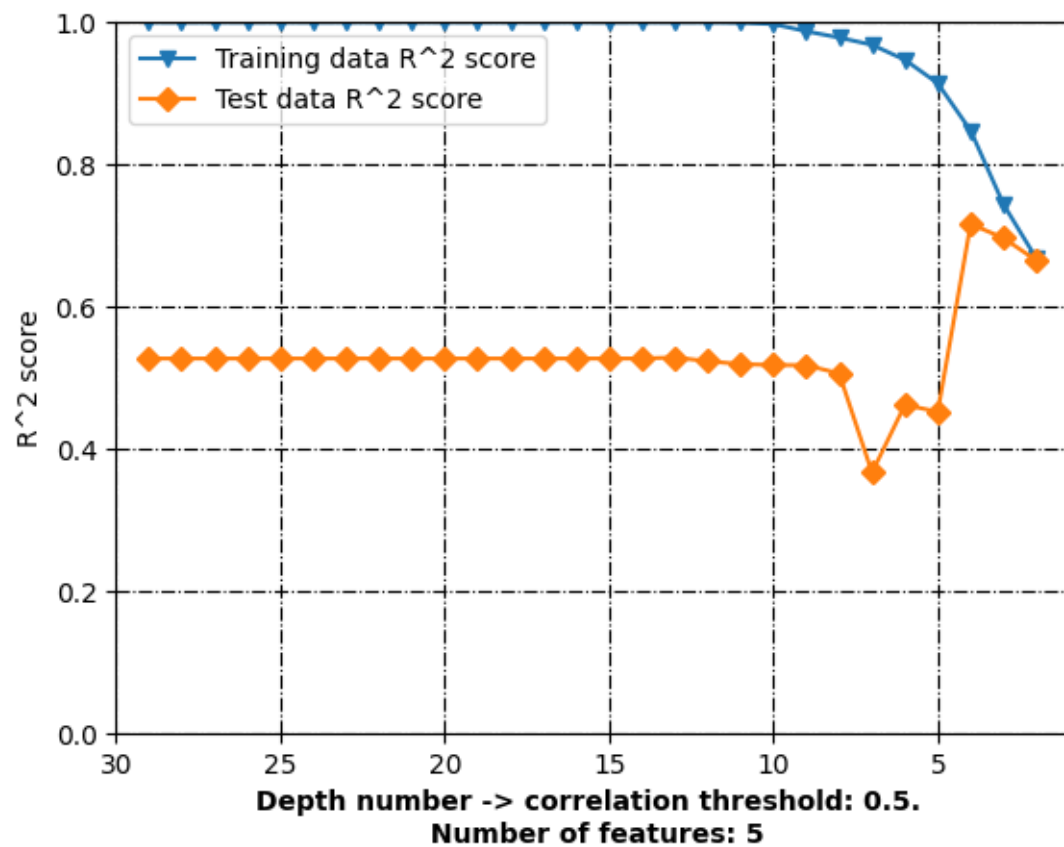



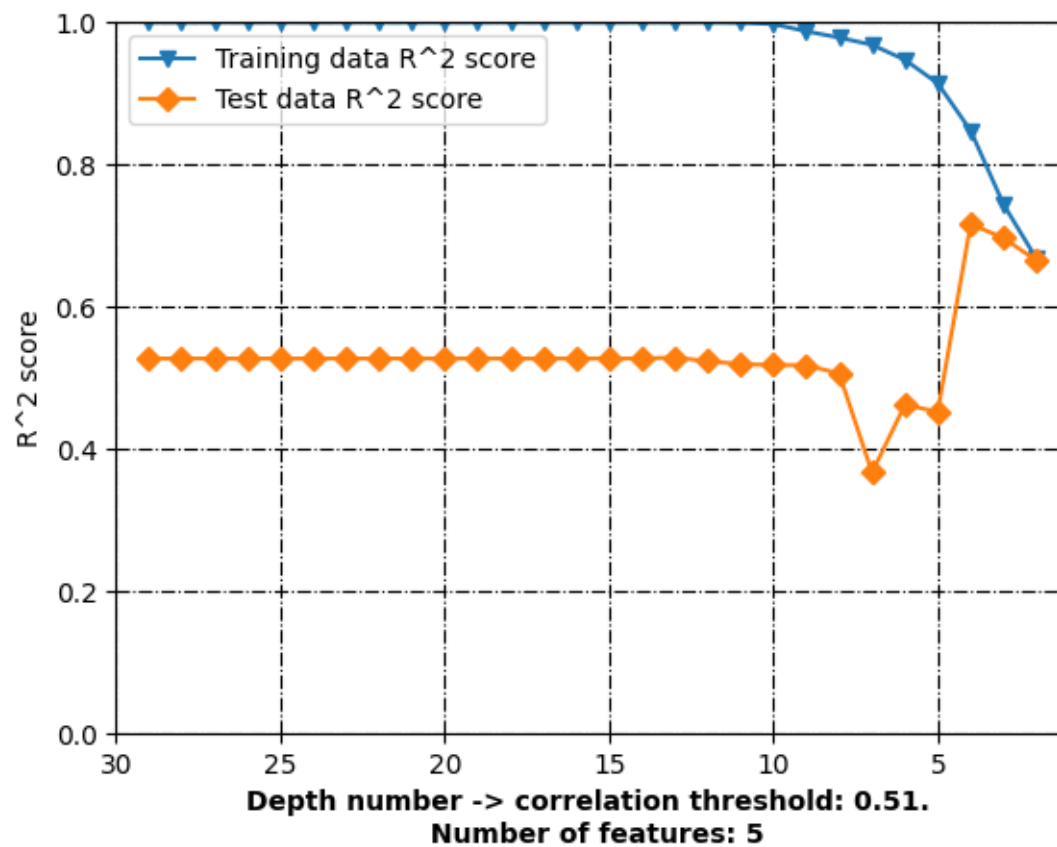

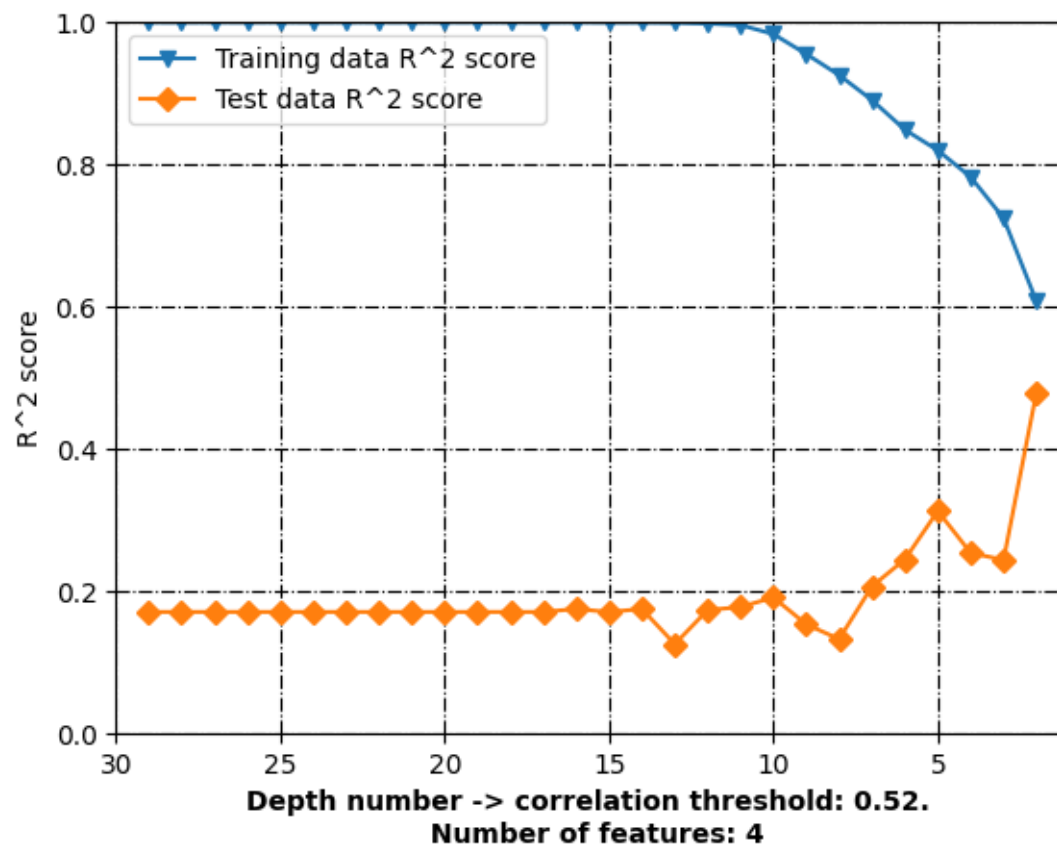

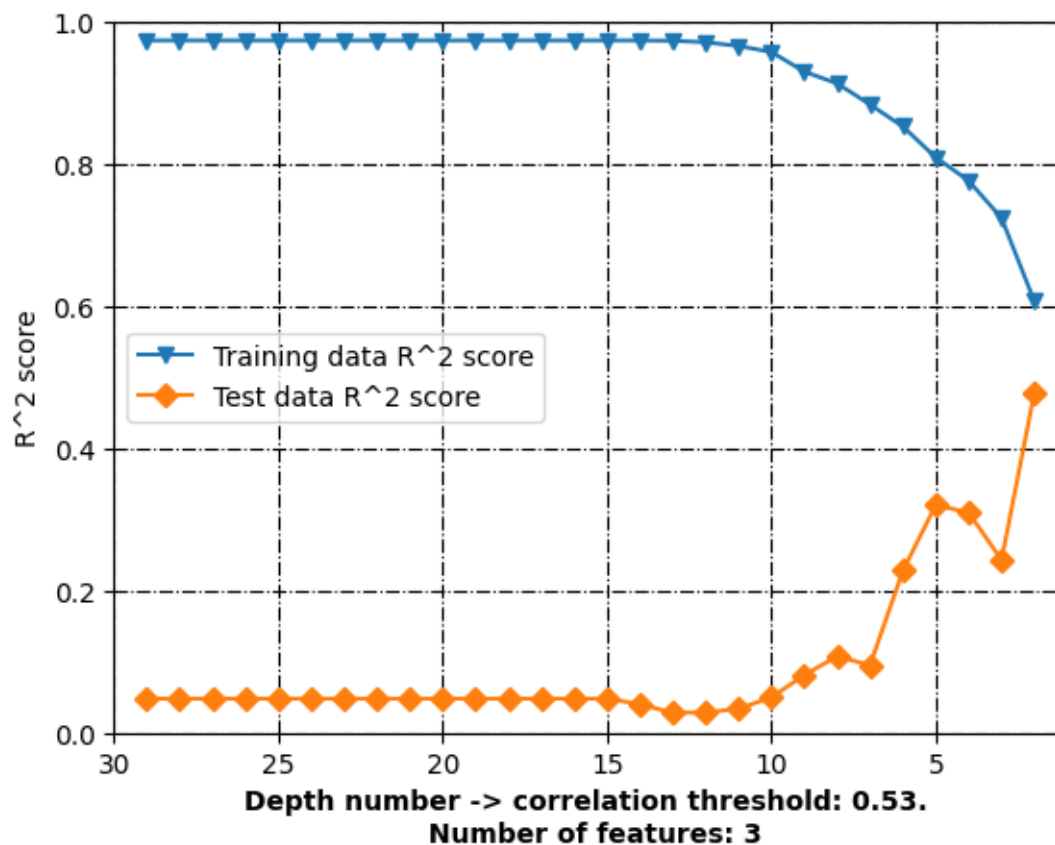

```
[20]: plt.plot(df_without_standardization['Correlation threshold'],  
             df_without_standardization['Number of features'], label = "Number of  
             features", marker='.')  
plt.legend()  
plt.xlabel('Correlation threshold')  
plt.ylabel('Number of features')  
plt.show()
```

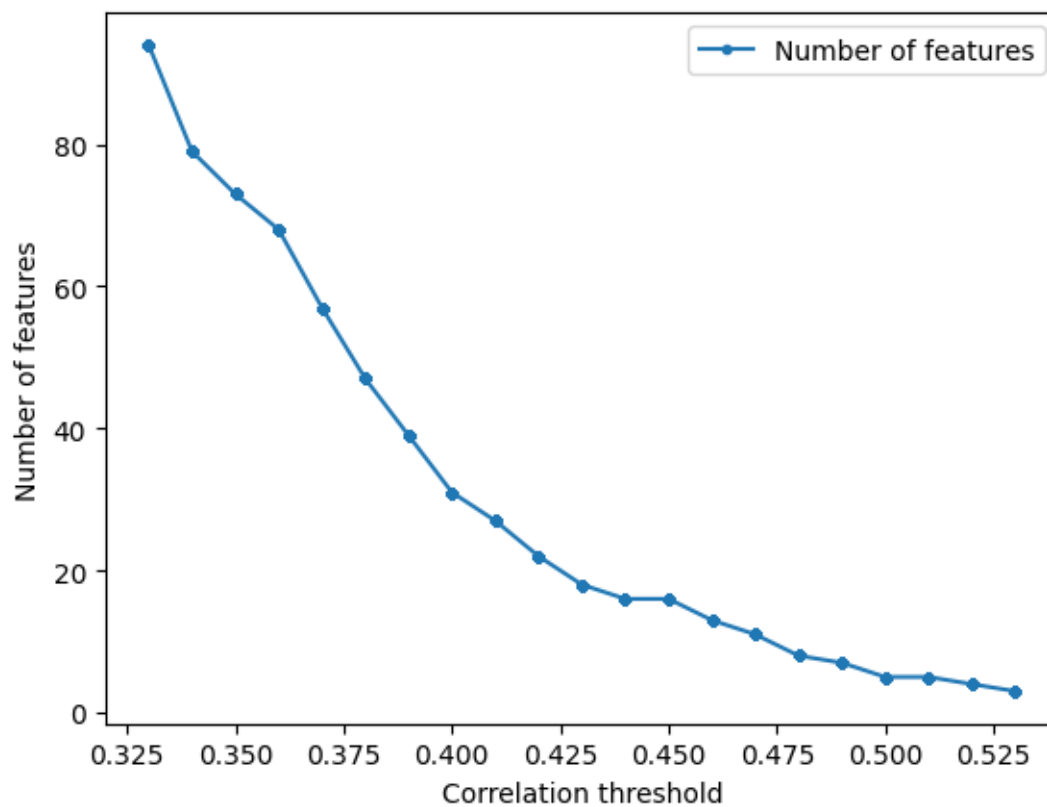

[ ]:

### 3 Random Forest

```
[21]: without_standardization, train_r2_, test_r2_, hist1, hist2, target_column_name,
      ↪ training_data_RMSE, test_data_RMSE = pred_model.
      ↪ prepare_data_and_create_model(molecular_descriptors_df=data,
      ↪
      ↪         correlation_threshold=0.50,
      ↪         standardization=False,
      ↪         model_type='RandomForestRegressor',
      ↪         n_estimators=12,
      ↪         target_column_name = target,
      ↪         random_state=random_state,
```

```

↪          train_test_split_=True,
↪          verbose=True)

```

I am not doing standardization...

|   | molecular descriptor name |  |  |
|---|---------------------------|--|--|
| 0 | AATSOZ                    |  |  |
| 1 | AATSOare                  |  |  |
| 2 | AATSOd                    |  |  |
| 3 | AATSOdv                   |  |  |
| 4 | AATSOi                    |  |  |

  

|   | molecular descriptor name | corr_value |  |
|---|---------------------------|------------|--|
| 0 | AATSOZ                    | -0.022797  |  |
| 1 | AATSOare                  | -0.139064  |  |
| 2 | AATSOd                    | 0.027592   |  |
| 3 | AATSOdv                   | -0.136049  |  |
| 4 | AATSOi                    | 0.168958   |  |

  

|   | molecular descriptor name | corr_value | absolute correlation value |
|---|---------------------------|------------|----------------------------|
| 0 | AATSOZ                    | -0.022797  | 0.022797                   |
| 1 | AATSOare                  | -0.139064  | 0.139064                   |
| 2 | AATSOd                    | 0.027592   | 0.027592                   |
| 3 | AATSOdv                   | -0.136049  | 0.136049                   |
| 4 | AATSOi                    | 0.168958   | 0.168958                   |

  

|      | molecular descriptor name | corr_value | absolute correlation value |
|------|---------------------------|------------|----------------------------|
| 226  | AMID_0                    | -0.557717  | 0.557717                   |
| 505  | EState_VSA5               | -0.534748  | 0.534748                   |
| 791  | MDEO-12                   | -0.555724  | 0.555724                   |
| 921  | SaasC                     | 0.513071   | 0.513071                   |
| 1091 | VSA_EState5               | 0.526082   | 0.526082                   |

  

|      | molecular descriptor name | corr_value | absolute correlation value |
|------|---------------------------|------------|----------------------------|
| 226  | AMID_0                    | -0.557717  | 0.557717                   |
| 505  | EState_VSA5               | -0.534748  | 0.534748                   |
| 791  | MDEO-12                   | -0.555724  | 0.555724                   |
| 921  | SaasC                     | 0.513071   | 0.513071                   |
| 1091 | VSA_EState5               | 0.526082   | 0.526082                   |

The model used is: RandomForest...

Return the coefficient of determination of the prediction:

0.7074034461598402

R<sup>2</sup> score: 0.9176000098861355

Correlation coefficient: 0.9579144063464833

Test data - unseen during training:

R<sup>2</sup> score: 0.7074034461598402

Correlation coefficient: 0.8410727948042549

[8.0030081 5.74447545 7.05947768 7.97223228 7.99229063 7.63253623  
8.01751878 7.29942536 8.03543867 7.63579976 8.39302261 8.08632736  
8.30093813 7.72989841 7.6806442 8.01313613 5.99467593 5.49942963]

102 7.920819

```
38      6.019997
8       5.996841
109     7.886057
11      7.962574
51      7.886057
88      8.075721
21      7.325139
82      7.978811
98      7.481486
58      7.677781
64      8.537602
74      8.142668
103     8.397940
91      8.958607
43      7.823909
25      4.886525
30      6.009661
```

```
Name: A549, dtype: float64
```

```
Training Root Mean Square Error: 0.2679798395343317
```

```
Testing Root Mean Square Error: 0.5607234734609626
```

```
[22]: print(target_column_name+str('_transformed'))
      print(hist1[target_column_name].hist())
```

```
A549_transformed
```

```
AxesSubplot(0.125,0.11;0.775x0.77)
```

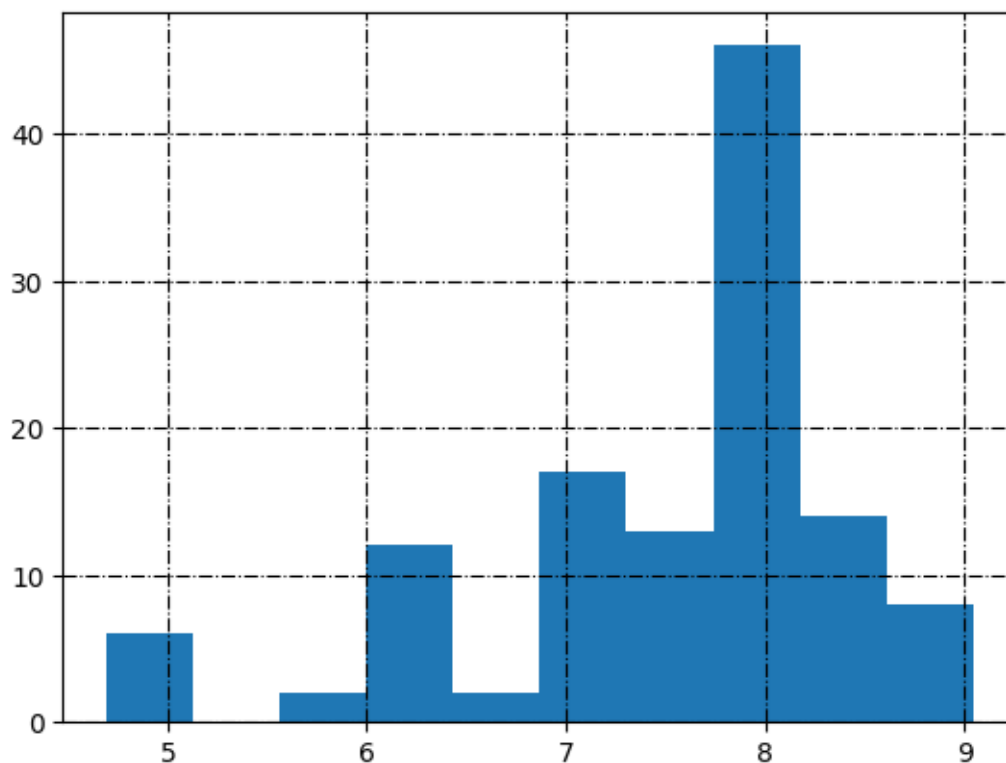

```
[23]: with_standardization, train_r2_, test_r2_, hist1, hist2, target_column_name,
      ↪ training_data_RMSE, test_data_RMSE = pred_model.
      ↪ prepare_data_and_create_model(molecular_descriptors_df=data,
      ↪
      ↪         correlation_threshold=0.50,
      ↪
      ↪         standardization=True,
      ↪
      ↪         model_type='RandomForestRegressor',
      ↪
      ↪         n_estimators=12,
      ↪
      ↪         target_column_name = target,
      ↪
      ↪         random_state=random_state,
      ↪
      ↪         train_test_split=True,
      ↪
      ↪         verbose=True)
```

I am doing standardization...  
molecular descriptor name

|      |                           |            |                            |
|------|---------------------------|------------|----------------------------|
| 0    | AATS0Z                    |            |                            |
| 1    | AATS0are                  |            |                            |
| 2    | AATS0d                    |            |                            |
| 3    | AATS0dv                   |            |                            |
| 4    | AATS0i                    |            |                            |
|      | molecular descriptor name | corr_value |                            |
| 0    | AATS0Z                    | -0.022797  |                            |
| 1    | AATS0are                  | -0.139064  |                            |
| 2    | AATS0d                    | 0.027592   |                            |
| 3    | AATS0dv                   | -0.136049  |                            |
| 4    | AATS0i                    | 0.168958   |                            |
|      | molecular descriptor name | corr_value | absolute correlation value |
| 0    | AATS0Z                    | -0.022797  | 0.022797                   |
| 1    | AATS0are                  | -0.139064  | 0.139064                   |
| 2    | AATS0d                    | 0.027592   | 0.027592                   |
| 3    | AATS0dv                   | -0.136049  | 0.136049                   |
| 4    | AATS0i                    | 0.168958   | 0.168958                   |
|      | molecular descriptor name | corr_value | absolute correlation value |
| 226  | AMID_0                    | -0.557717  | 0.557717                   |
| 505  | EState_VSA5               | -0.534748  | 0.534748                   |
| 791  | MDE0-12                   | -0.555724  | 0.555724                   |
| 921  | SaasC                     | 0.513071   | 0.513071                   |
| 1091 | VSA_EState5               | 0.526082   | 0.526082                   |
|      | molecular descriptor name | corr_value | absolute correlation value |
| 226  | AMID_0                    | -0.557717  | 0.557717                   |
| 505  | EState_VSA5               | -0.534748  | 0.534748                   |
| 791  | MDE0-12                   | -0.555724  | 0.555724                   |
| 921  | SaasC                     | 0.513071   | 0.513071                   |
| 1091 | VSA_EState5               | 0.526082   | 0.526082                   |

The model used is: RandomForest...

Return the coefficient of determination of the prediction:  
0.7074034461598402

R<sup>2</sup> score: 0.9176000098861355

Correlation coefficient: 0.9579144063464833

Test data - unseen during training:  
R<sup>2</sup> score: 0.7074034461598402

Correlation coefficient: 0.8410727948042549

[8.0030081 5.74447545 7.05947768 7.97223228 7.99229063 7.63253623  
8.01751878 7.29942536 8.03543867 7.63579976 8.39302261 8.08632736  
8.30093813 7.72989841 7.6806442 8.01313613 5.99467593 5.49942963]  
102 7.920819  
38 6.019997  
8 5.996841  
109 7.886057  
11 7.962574  
51 7.886057  
88 8.075721  
21 7.325139



```

82      7.978811
98      7.481486
58      7.677781
64      8.537602
74      8.142668
103     8.397940
91      8.958607
43      7.823909
25      4.886525
30      6.009661

```

Name: A549, dtype: float64

Training Root Mean Square Error: 0.2679798395343317

Testing Root Mean Square Error: 0.5607234734609626

### 3.1 Search inside correlation space

```

[24]: step = 0.01
initial_step = corr_low
last_step = corr_high
first_list = [x / 100.0 for x in range(int(initial_step*100),
    ↪int(last_step*100), int(step*100))]
n_estimators = [range(2,21,1)]
corr_th = []
second_list = []
third_list = []
fourth_l = []
fifth_l = []
f_list = []
fif_list = []
for i in first_list:

    for estimator in n_estimators[0]:

        without_standardization, train_r2, test_r2, _, h_, target_column_name,
    ↪training_data_RMSE, test_data_RMSE = pred_model.
    ↪prepare_data_and_create_model(molecular_descriptors_df=data,

    ↪                                correlation_threshold=i,

    ↪                                standardization=False,

    ↪                                model_type='RandomForestRegressor',

    ↪                                n_estimators_=estimator,

    ↪                                target_column_name = target,

```

```

    random_state=random_state,

    train_test_split_=True,

    verbose=False)
    corr_th.append(i)
    second_list.append(train_r2)
    third_list.append(test_r2)
    fourth_l.append(training_data_RMSE)
    fifth_l.append(test_data_RMSE)
    f_list.append(len(h_))
    fif_list.append(estimator)

```

```

[25]: df_without_standardization = pd.DataFrame(data=corr_th, columns=["Correlation_
    ↪threshold"])
df_without_standardization['Training data R^2 score'] = second_list
df_without_standardization['Test data R^2 score'] = third_list
df_without_standardization['Training RMSE'] = fourth_l
df_without_standardization['Test RMSE'] = fifth_l
df_without_standardization['Number of features'] = f_list
df_without_standardization['Number of estimators'] = fif_list

```

```

[26]: df_random_forest = df_without_standardization.copy()
#df_without_standardization.to_excel('../Data/
    ↪A549_Random_forest_rs_'+str(random_state)+'_xlsx')

```

```

[27]: corre_list = [x / 100.0 for x in range(int(initial_step*100),
    ↪int(last_step*100), int(0.01*100))]
for element in corre_list:
    element_ =
    ↪df_without_standardization[df_without_standardization['Correlation_
    ↪threshold'] == float(element)]
    plt.plot(element_['Number of estimators'], element_['Training data R^2_
    ↪score'], label = "Training data R^2 score", marker='v')
    plt.plot(element_['Number of estimators'], element_['Test data R^2 score'],
    ↪label = "Test data R^2 score", marker='D')
    plt.legend()
    plt.xlabel('Number of estimators -> correlation threshold: '+str(element)+'.'
    ↪\n Number of features: '+str(element_['Number of features'].iloc[0]))
    plt.xlim(max(element_['Number of estimators'])+1, min(element_['Number of_
    ↪estimators'])-1)
    plt.ylabel('R^2 score')
    plt.ylim([0, 1])
    plt.rc('grid', linestyle="-. ", color='black')
    plt.grid(True)

```

```
plt.show()
```

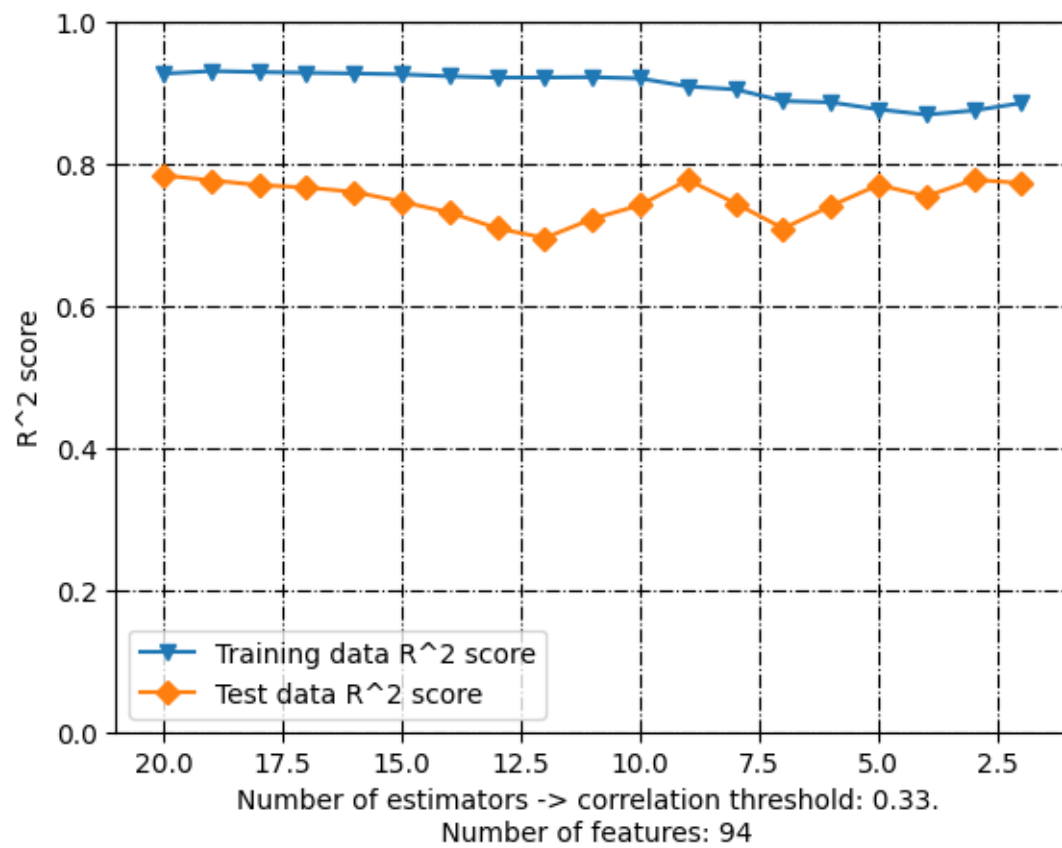

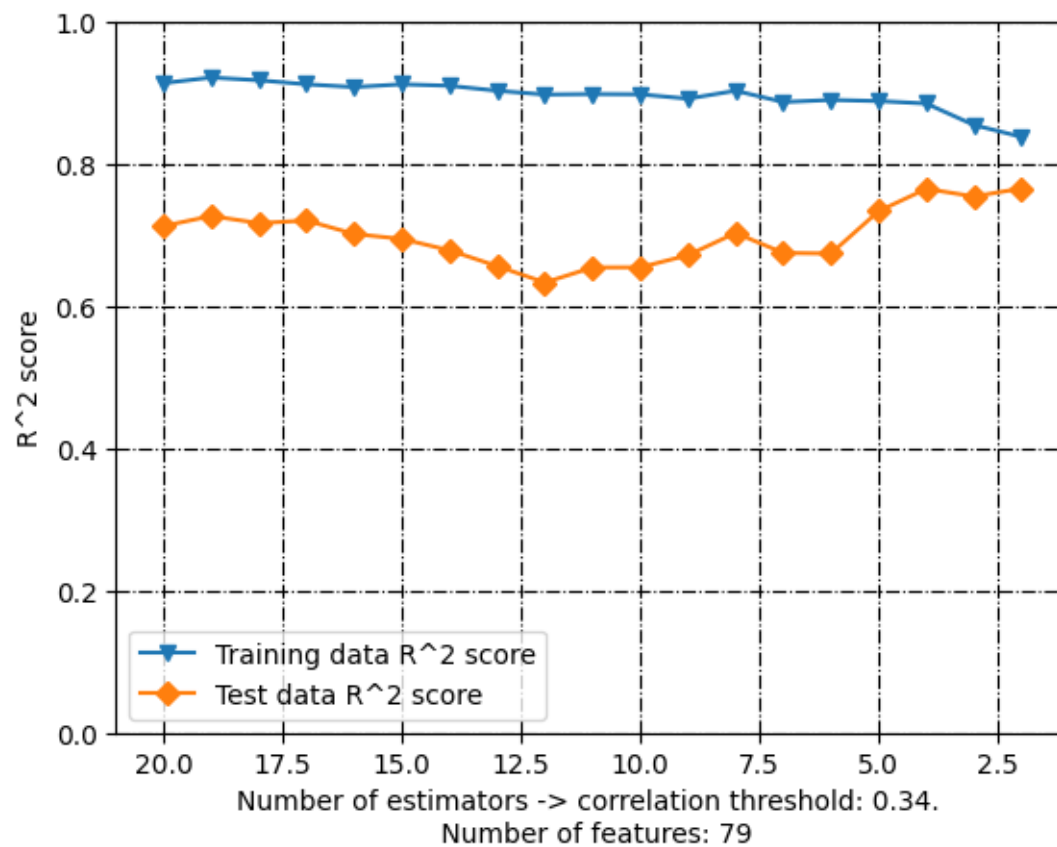

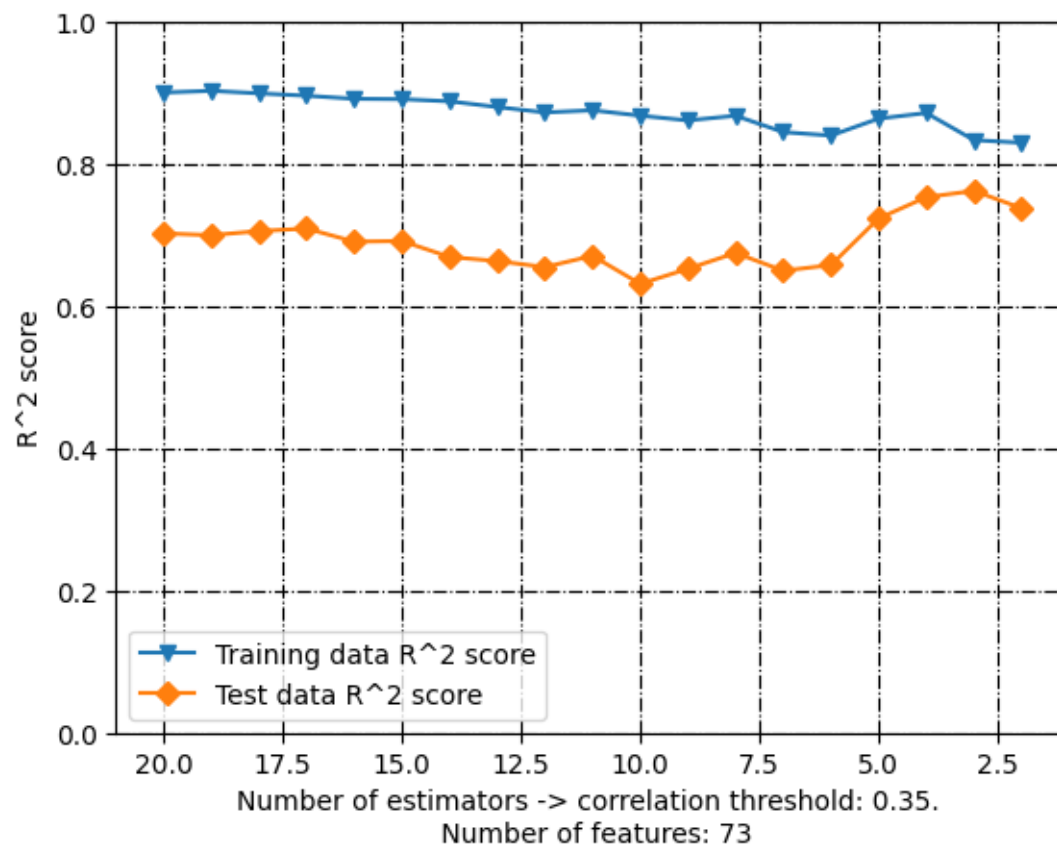

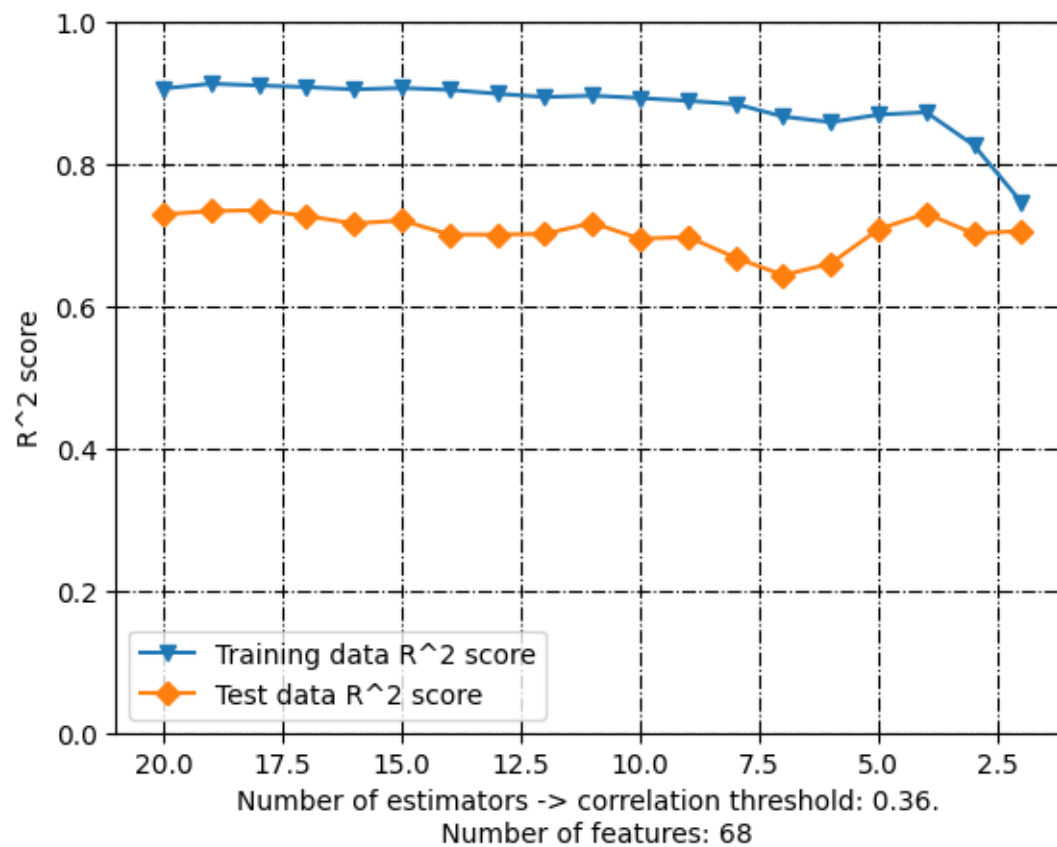

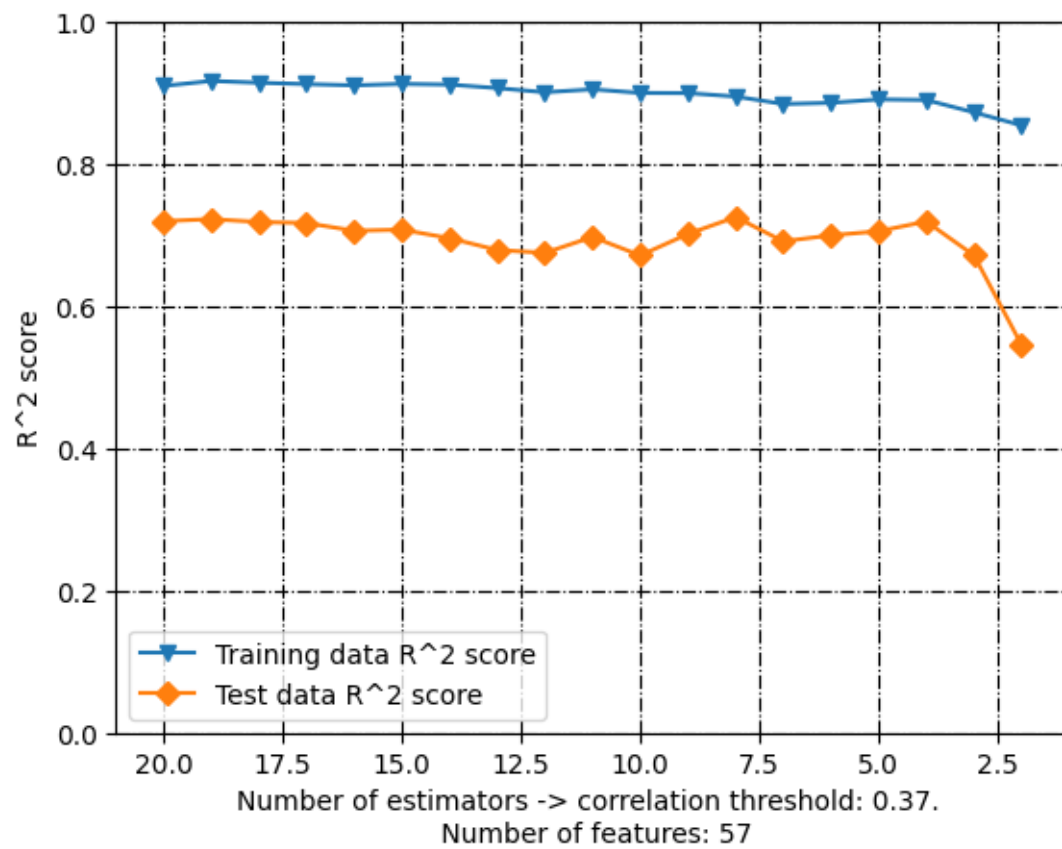

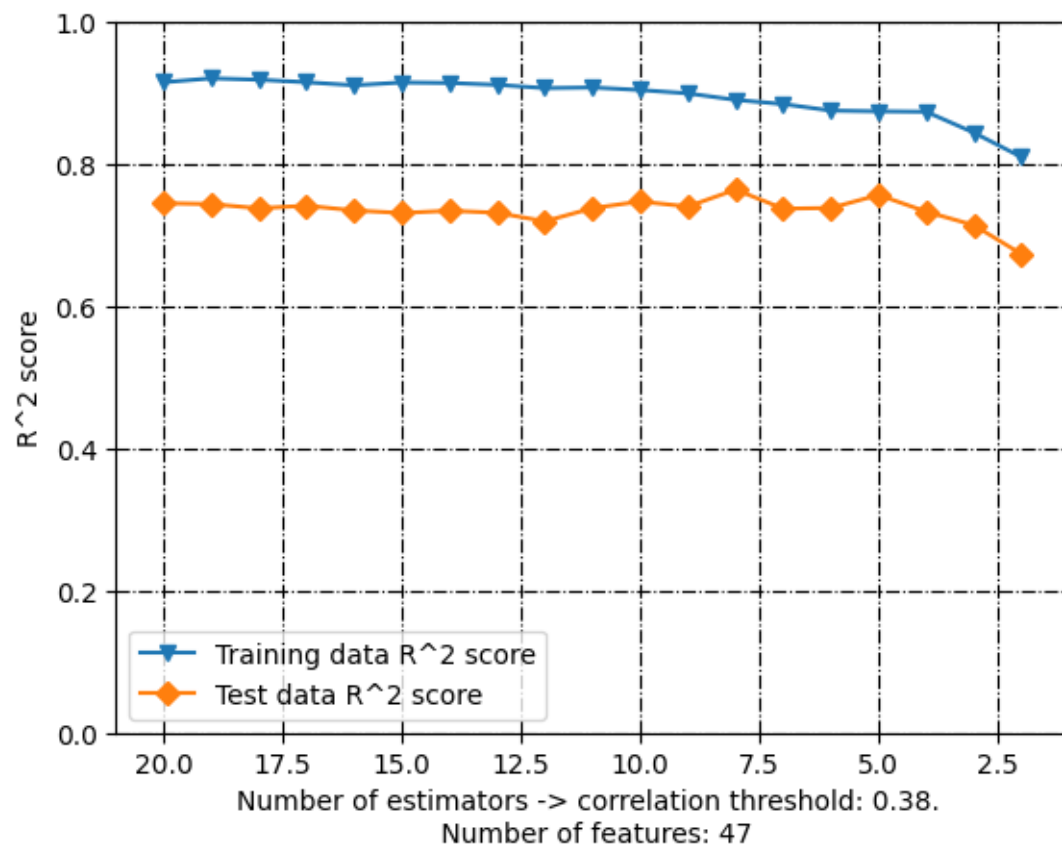



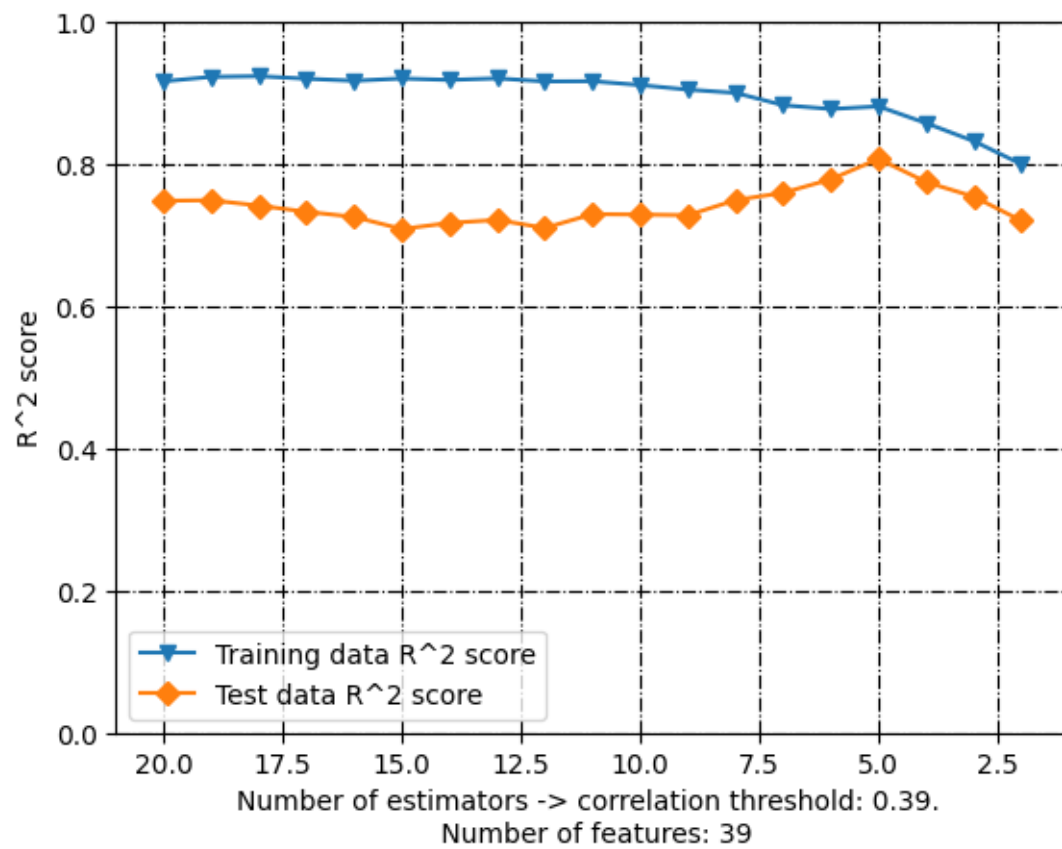

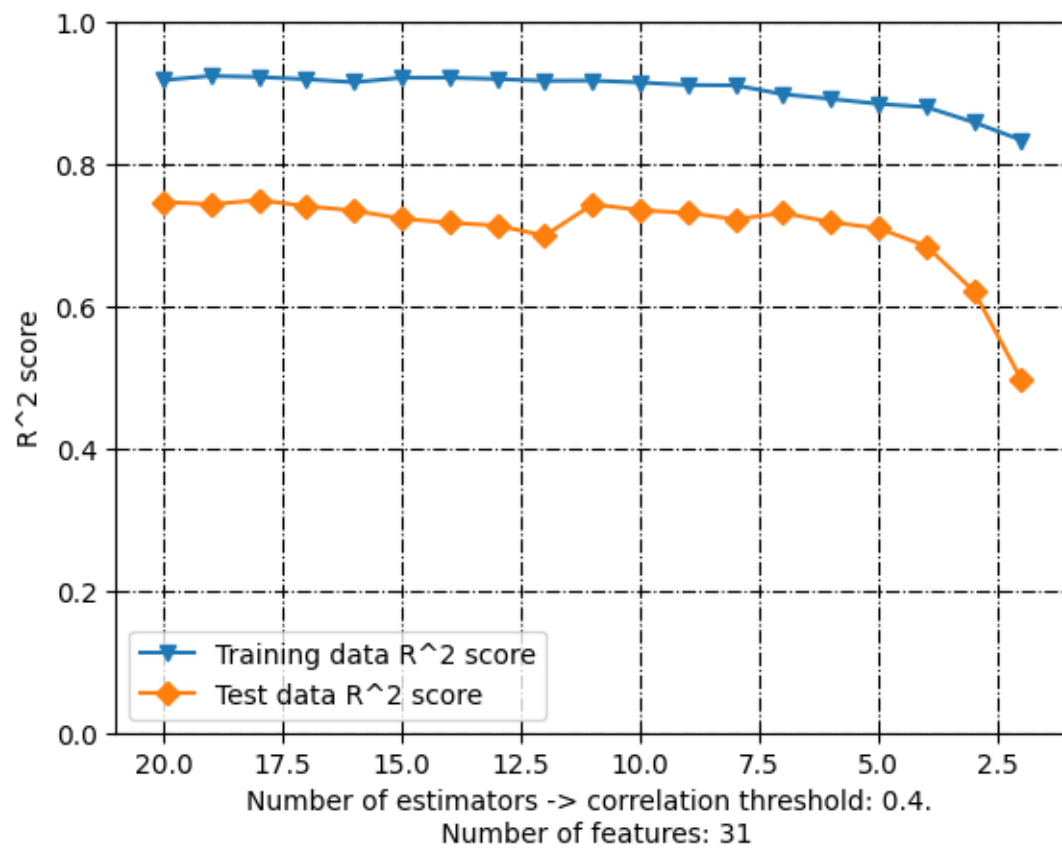

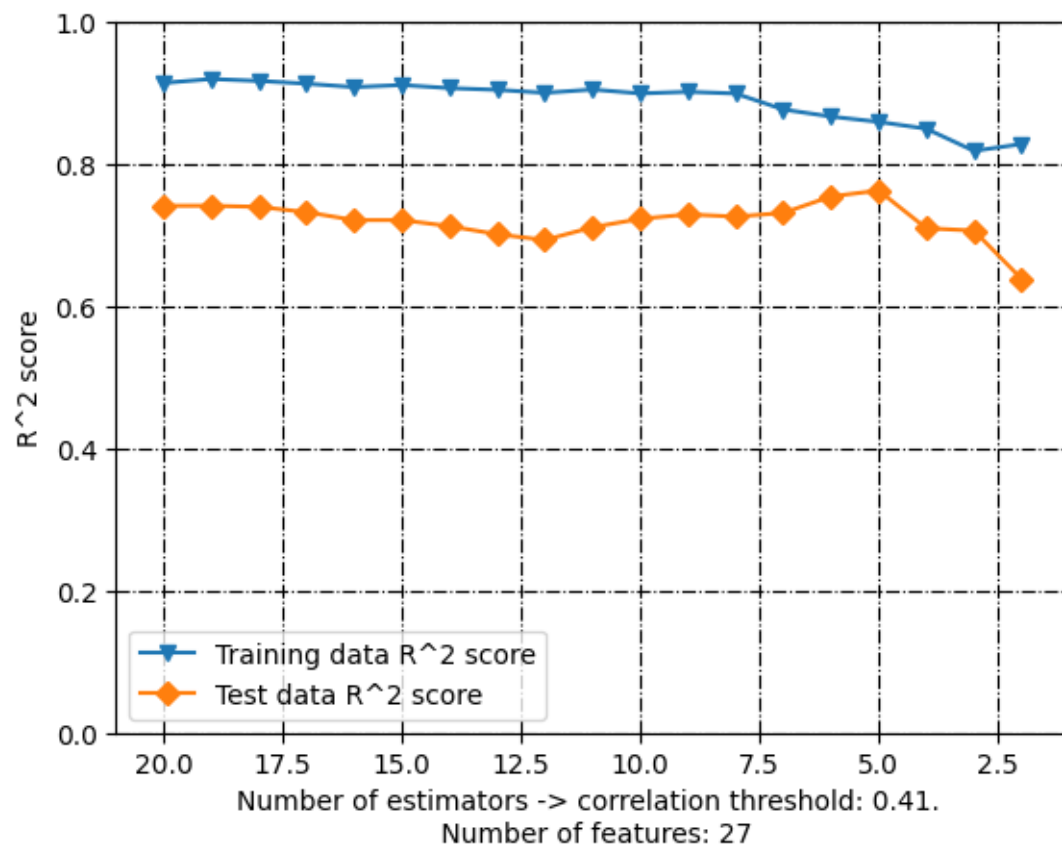

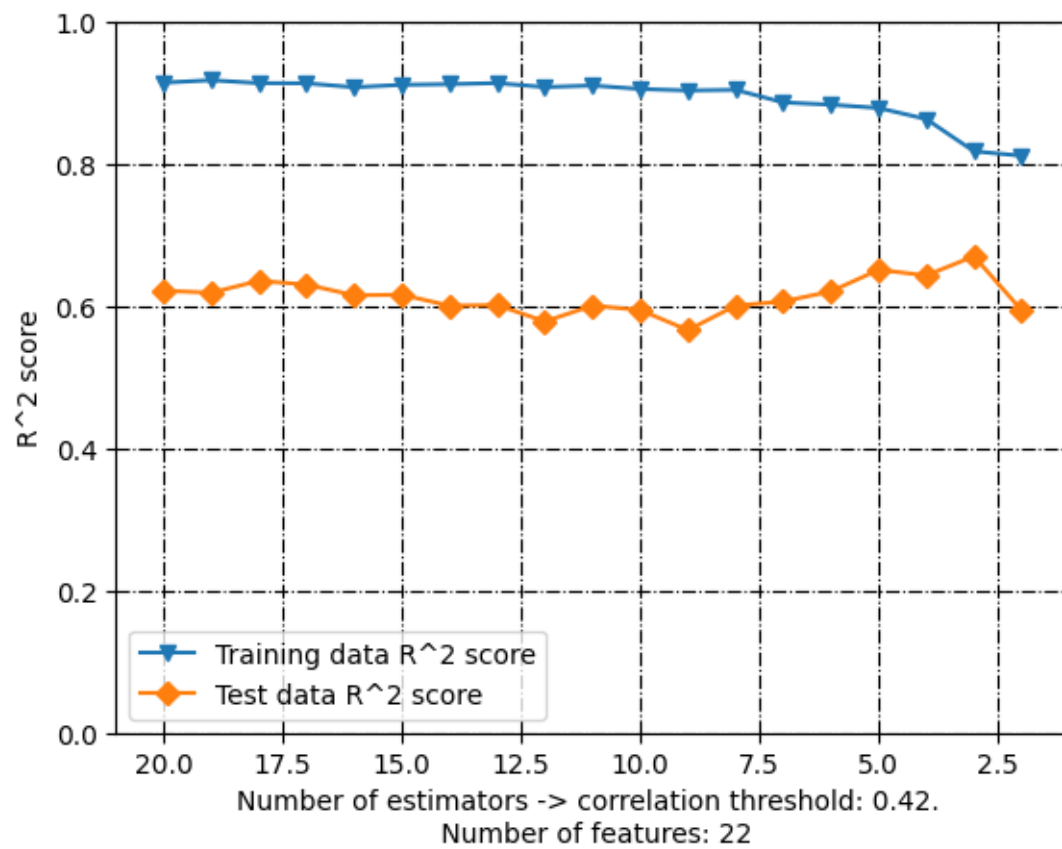

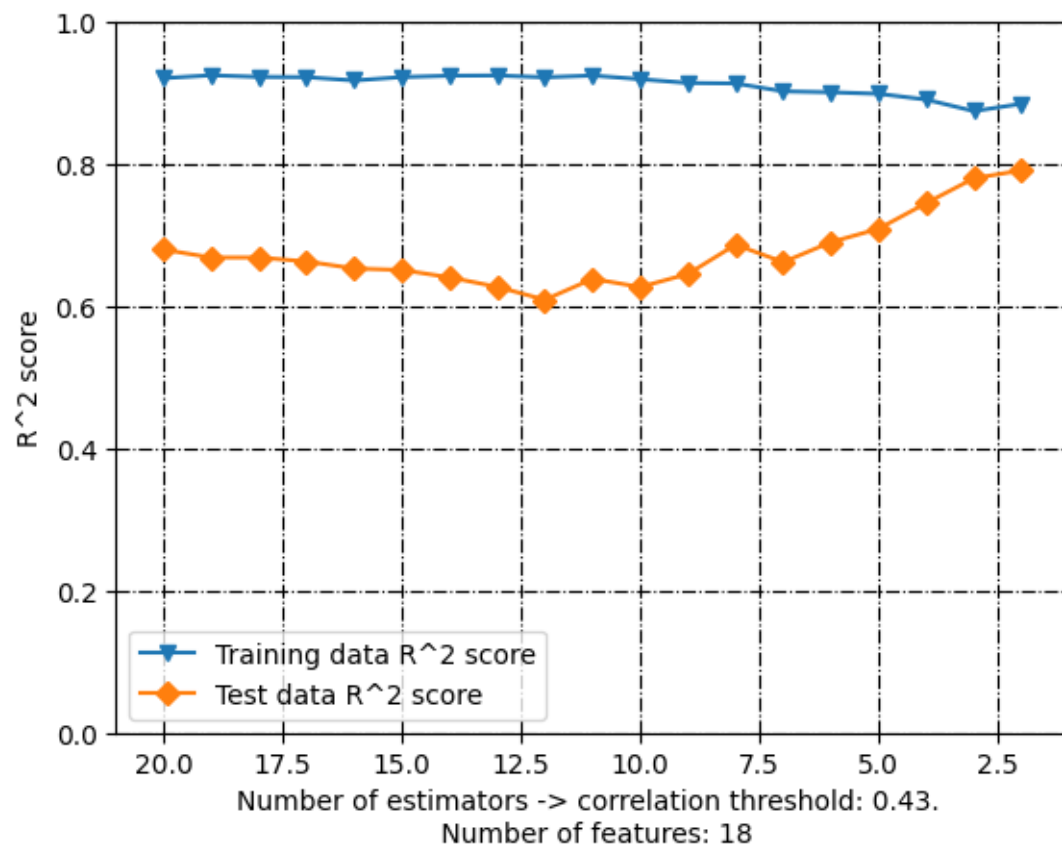

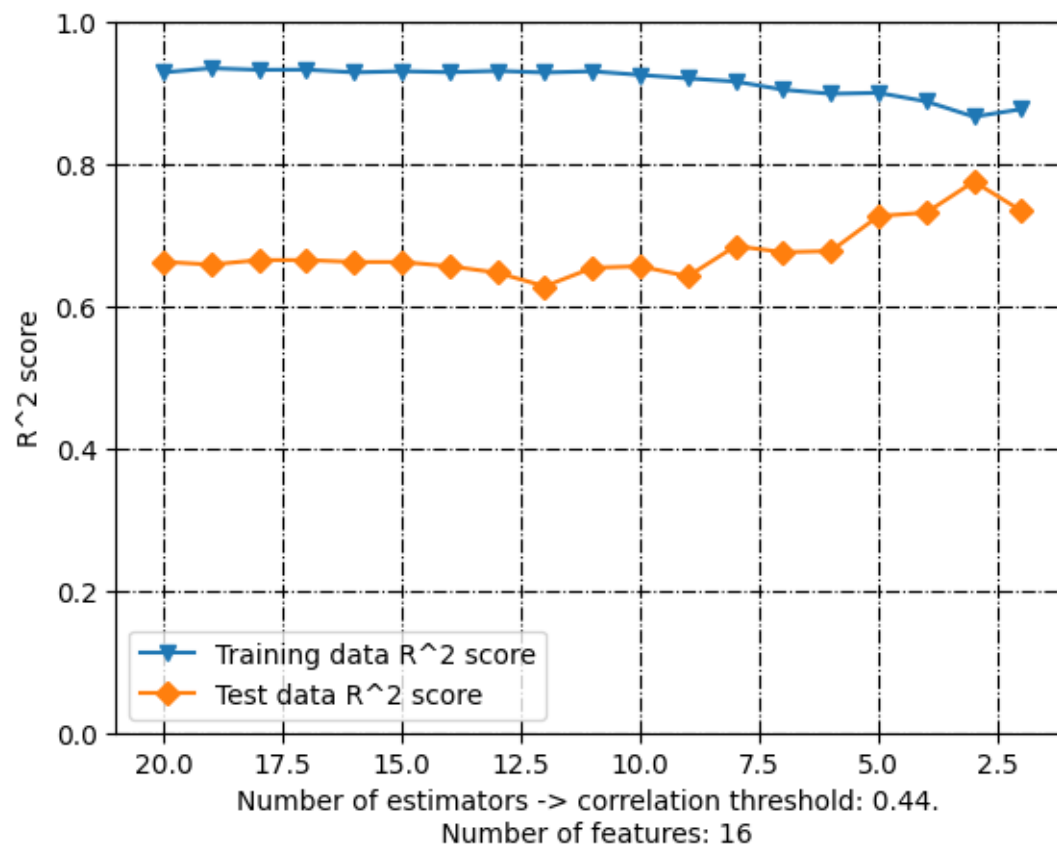

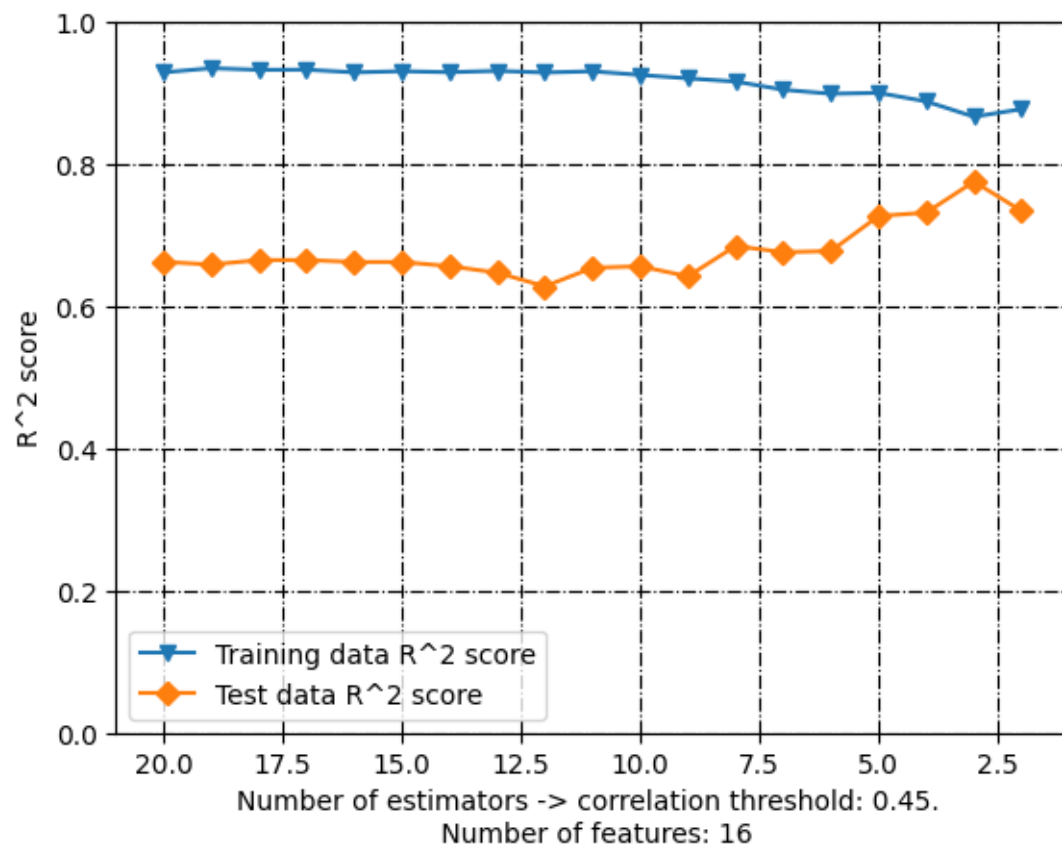

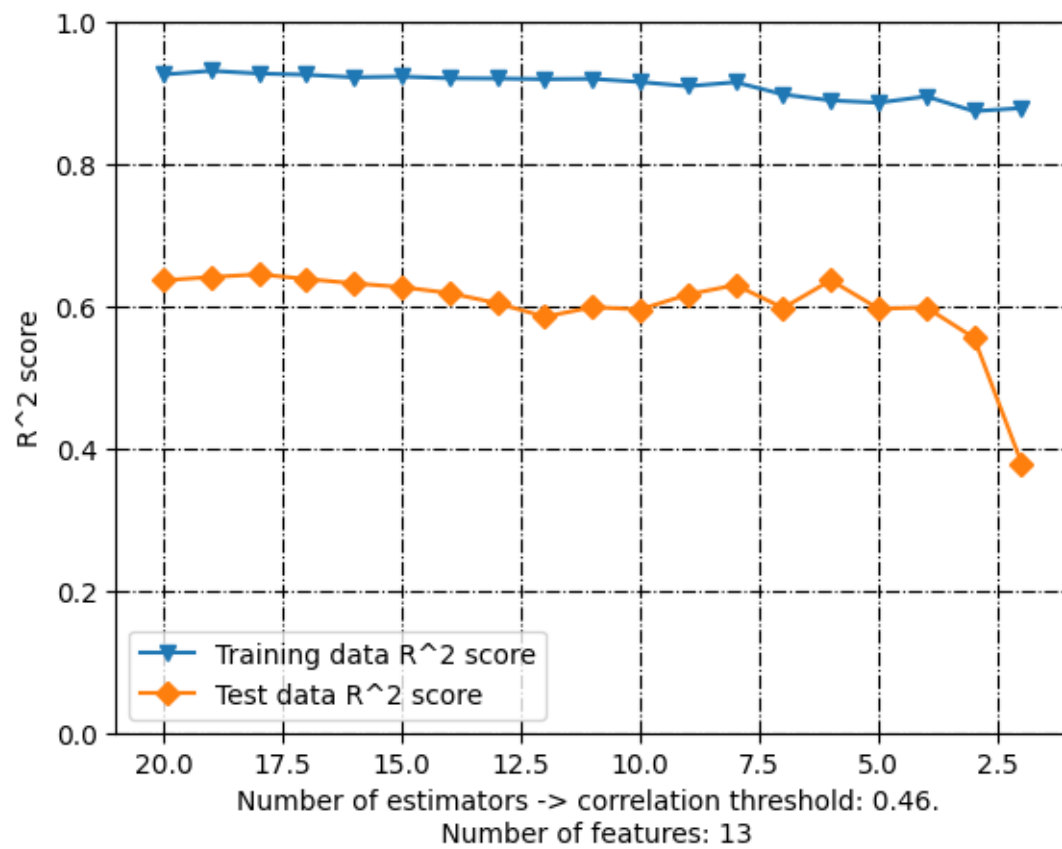



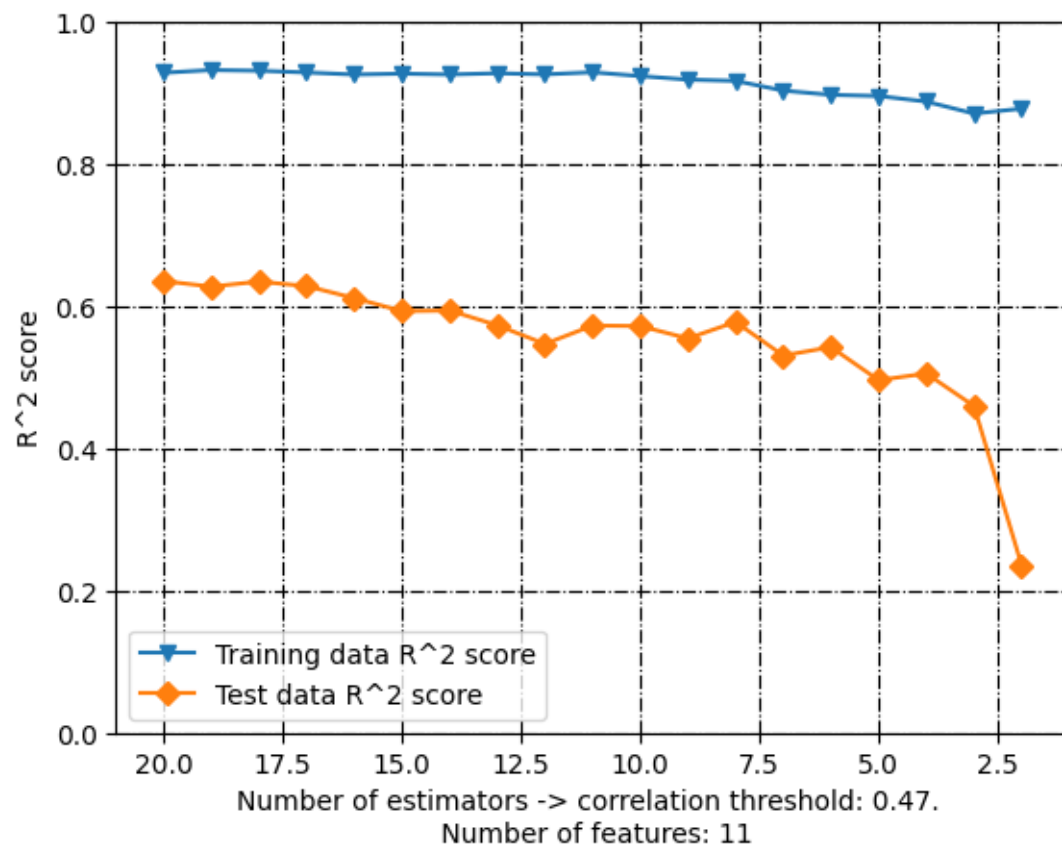

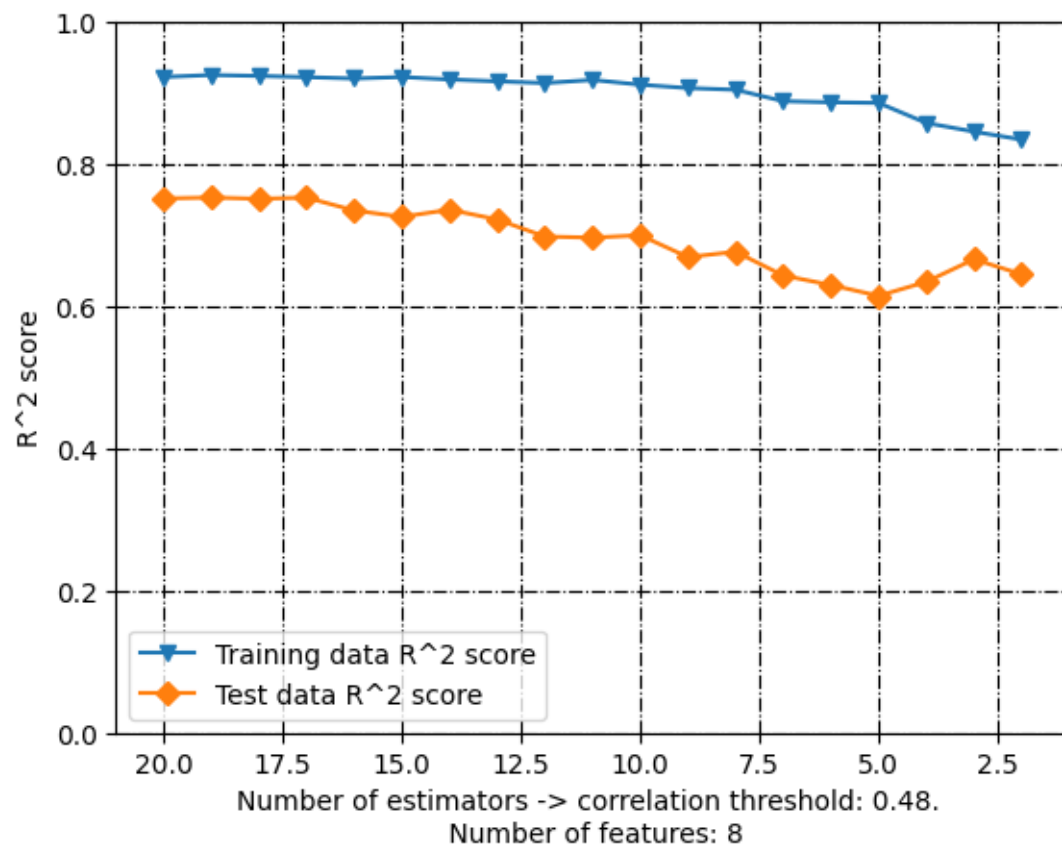

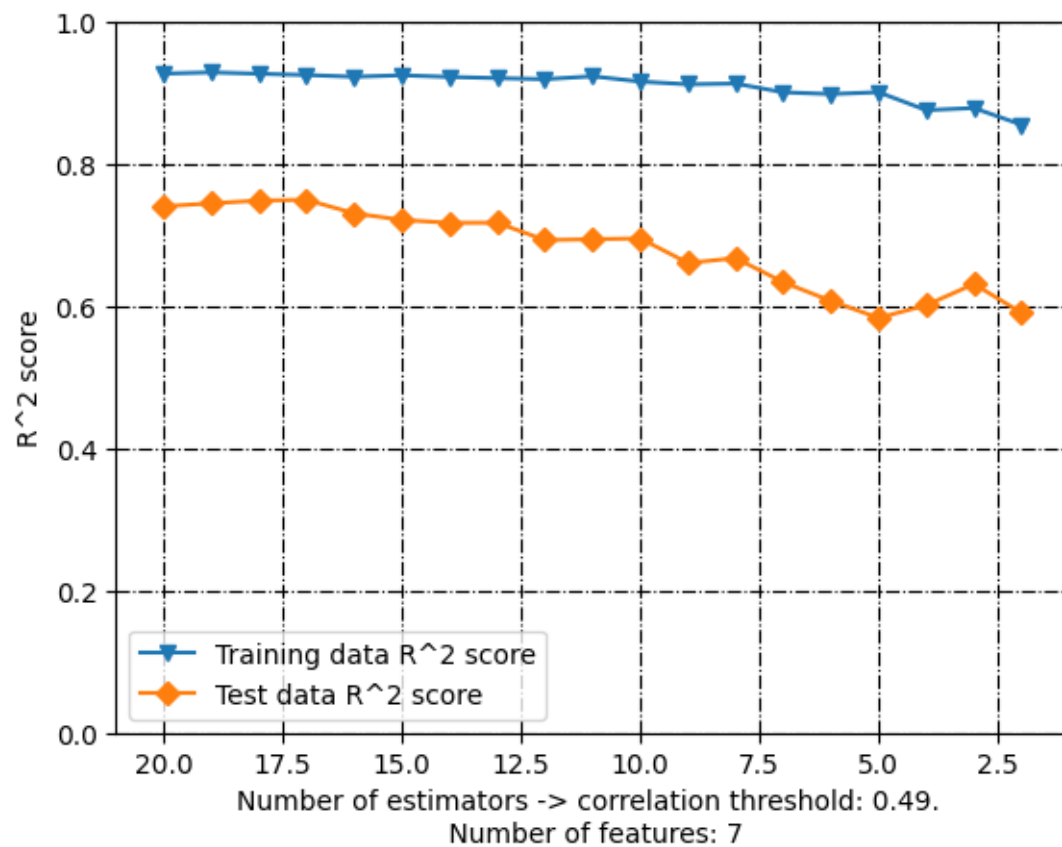

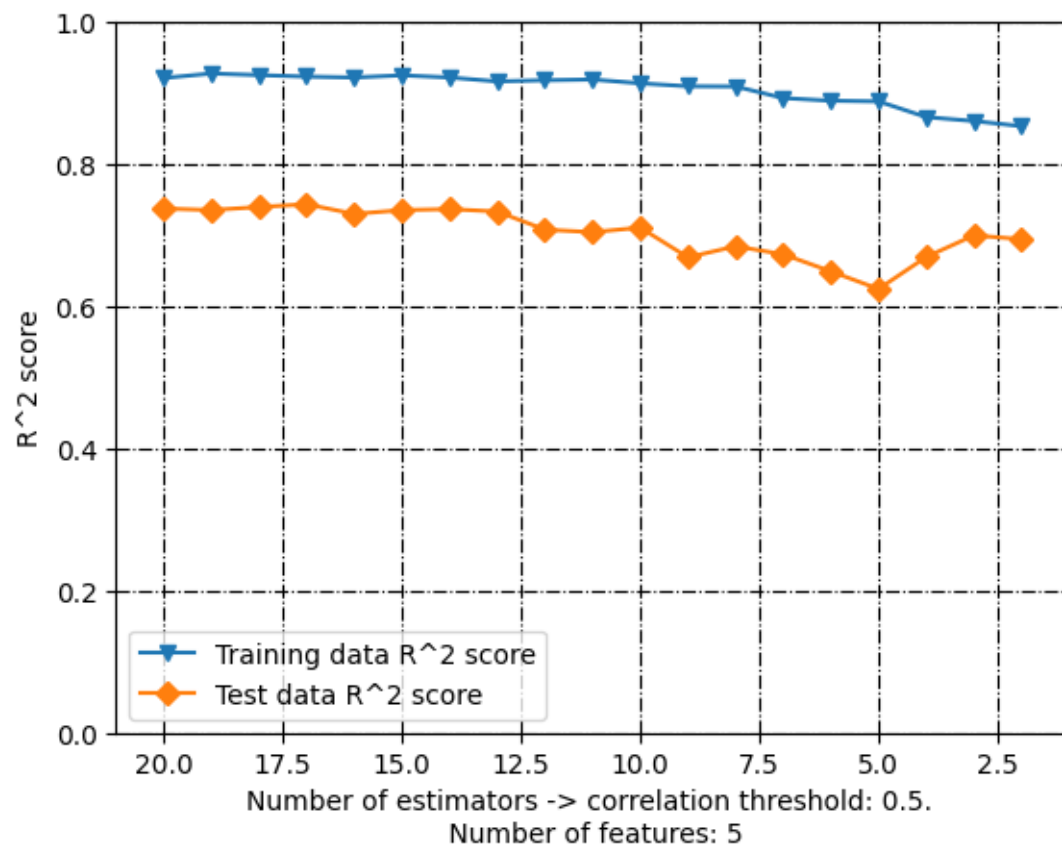

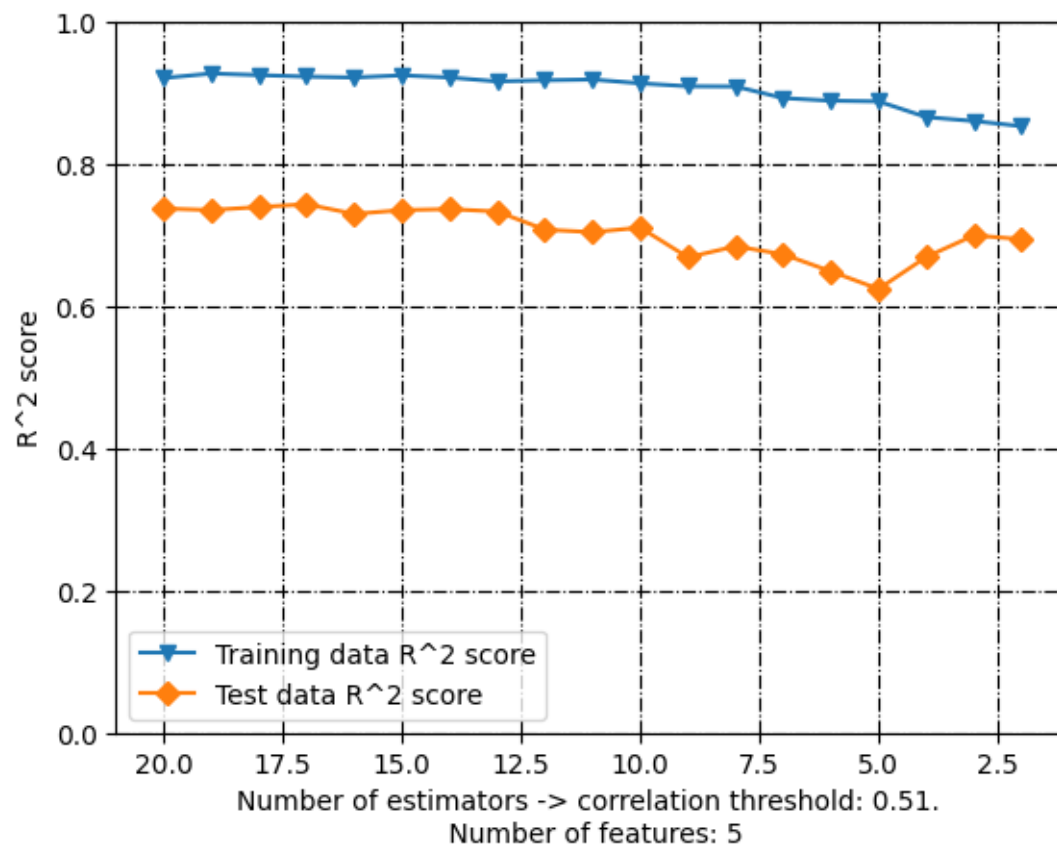

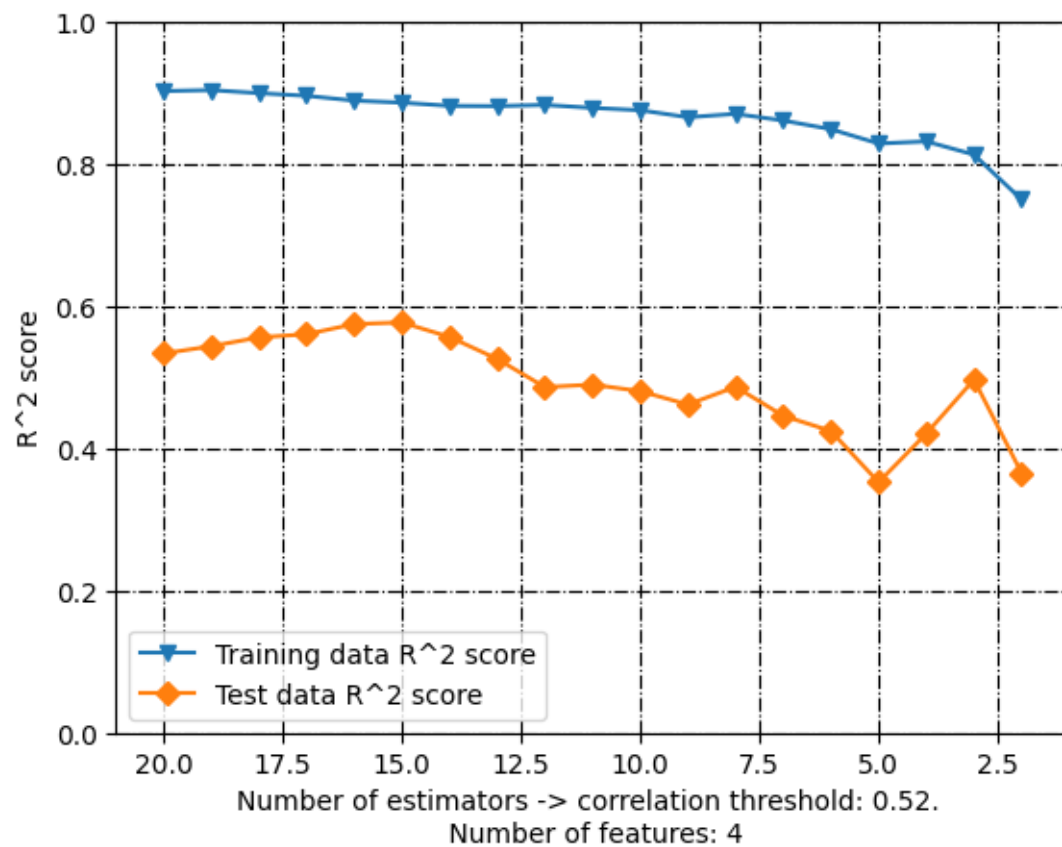

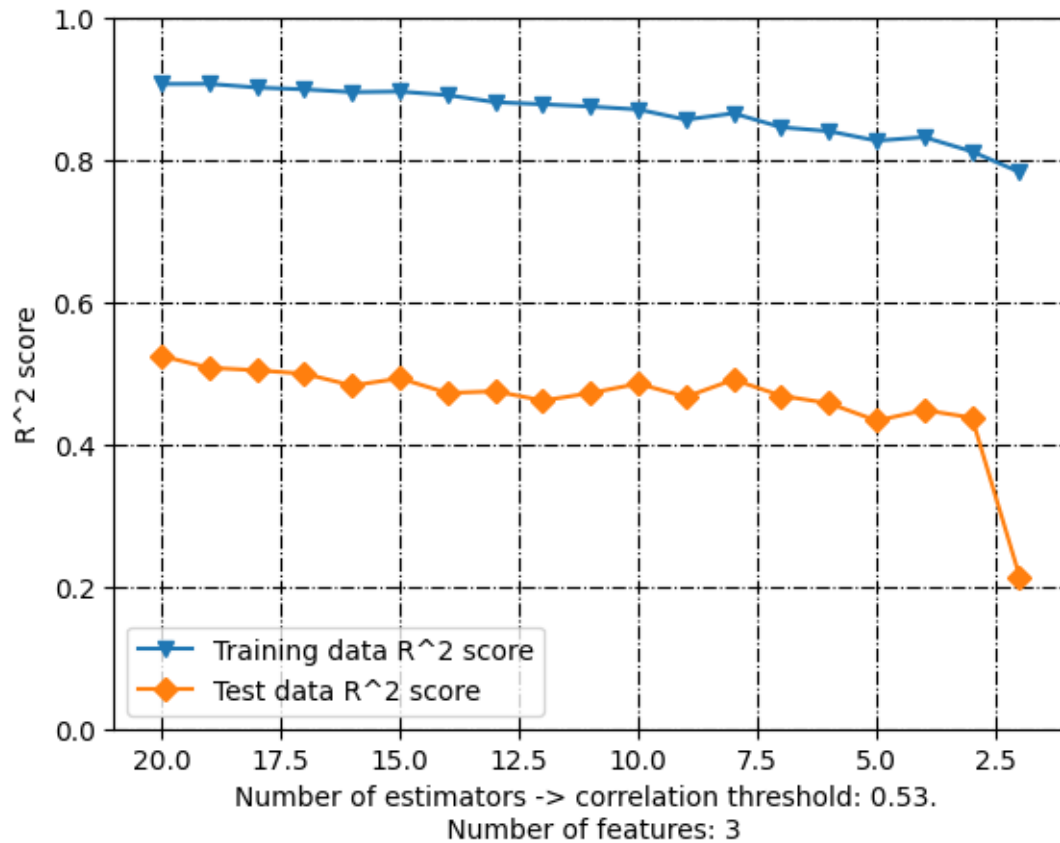

```
[28]: plt.plot(df_without_standardization['Correlation threshold'],
             df_without_standardization['Number of features'], label = "Number of
             features", marker='.')
plt.legend()
plt.xlabel('Correlation threshold')
plt.ylabel('Number of features')
plt.show()
```

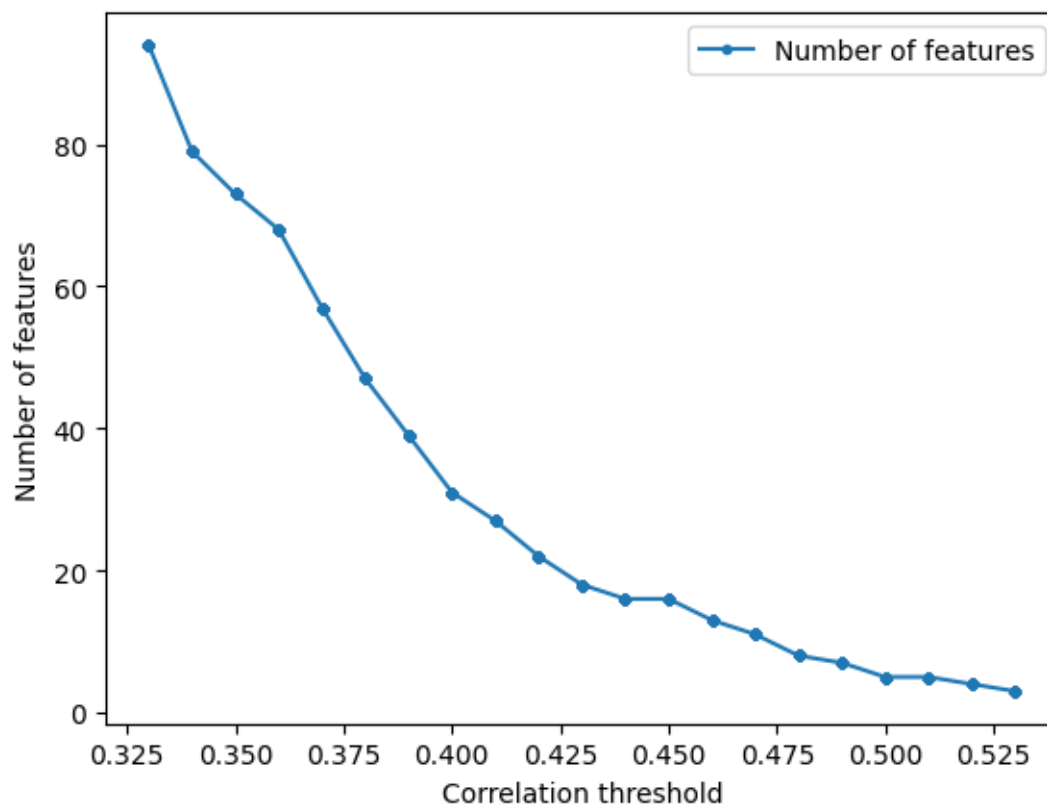

[ ]:

## 4 KNeighborsRegressor

```
[29]: without_standardization, train_r2_, test_r2_, hist1, hist2, target_column_name,
      ↪ training_data_RMSE, test_data_RMSE = pred_model.
      ↪ prepare_data_and_create_model(molecular_descriptors_df=data,
      ↪
      ↪         correlation_threshold=0.50,
      ↪
      ↪         standardization=False,
      ↪
      ↪         model_type='KNeighborsRegressor',
      ↪
      ↪         target_column_name = target,
      ↪
      ↪         random_state=random_state,
      ↪
      ↪         train_test_split=True,
```



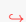

verbose=True)

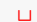

I am not doing standardization...

```
molecular descriptor name
0          AATSOZ
1          AATSOare
2          AATSOd
3          AATSOdv
4          AATSOi
molecular descriptor name  corr_value
0          AATSOZ          -0.022797
1          AATSOare        -0.139064
2          AATSOd           0.027592
3          AATSOdv         -0.136049
4          AATSOi           0.168958
molecular descriptor name  corr_value  absolute correlation value
0          AATSOZ          -0.022797          0.022797
1          AATSOare        -0.139064          0.139064
2          AATSOd           0.027592          0.027592
3          AATSOdv         -0.136049          0.136049
4          AATSOi           0.168958          0.168958
molecular descriptor name  corr_value  absolute correlation value
226          AMID_0        -0.557717          0.557717
505          EState_VSA5    -0.534748          0.534748
791          MDEO-12        -0.555724          0.555724
921          SaasC           0.513071          0.513071
1091         VSA_EState5     0.526082          0.526082
molecular descriptor name  corr_value  absolute correlation value
226          AMID_0        -0.557717          0.557717
505          EState_VSA5    -0.534748          0.534748
791          MDEO-12        -0.555724          0.555724
921          SaasC           0.513071          0.513071
1091         VSA_EState5     0.526082          0.526082
The model used is: KNeighbors...
Return the coefficient of determination of the prediction:
0.7385820073958993
R^2 score: 0.5920842564446827
Correlation coefficient: 0.7694701140685599
Test data - unseen during training:
R^2 score: 0.7385820073958993
Correlation coefficient: 0.8594079400354055
[7.99503884 5.36315619 5.86699104 7.99067194 7.62074397 7.7994894
 8.04916244 7.62074397 7.8354149 8.28987278 6.48251944 7.97780679
 8.28987278 7.67599179 7.91842501 7.75521654 5.36946488 6.326328 ]
102      7.920819
38       6.019997
8        5.996841
```

```

109    7.886057
11     7.962574
51     7.886057
88     8.075721
21     7.325139
82     7.978811
98     7.481486
58     7.677781
64     8.537602
74     8.142668
103    8.397940
91     8.958607
43     7.823909
25     4.886525
30     6.009661
Name: A549, dtype: float64
Training Root Mean Square Error: 0.5962436633769816
Testing Root Mean Square Error: 0.5300073247180529

```

```

[30]: print(target_column_name+str('_transformed'))
      print(hist1[target_column_name].hist())

```

```

A549_transformed
AxesSubplot(0.125,0.11;0.775x0.77)

```

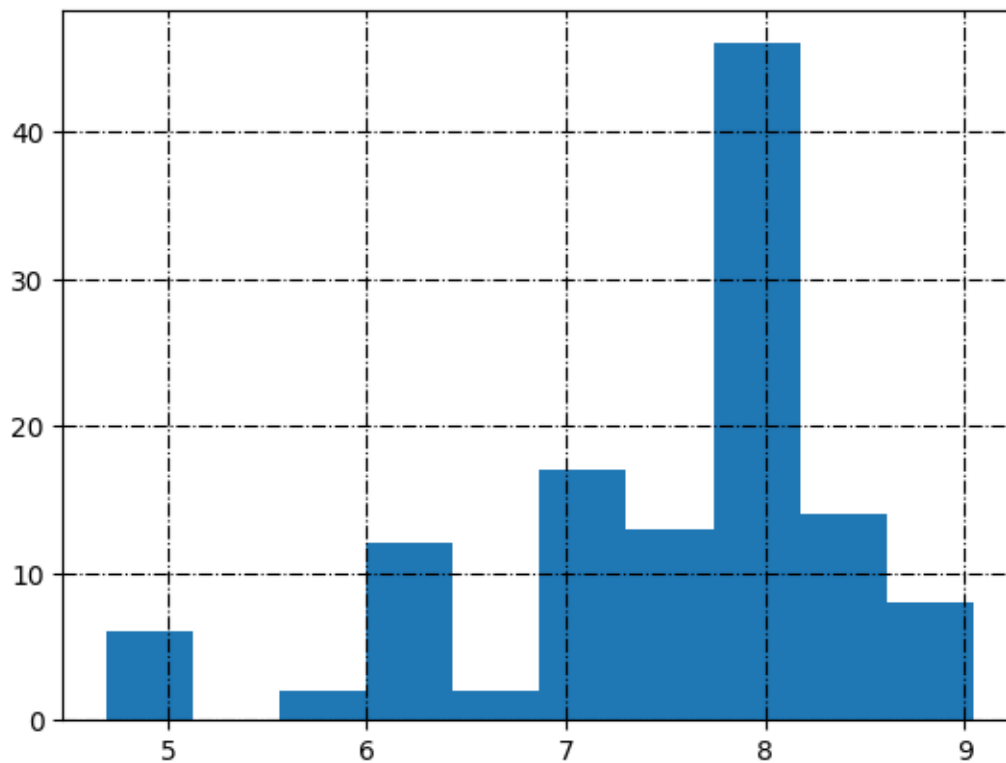

```
[31]: with_standardization, train_r2_, test_r2_, hist1, hist2, target_column_name,
      ↪ training_data_RMSE, test_data_RMSE = pred_model.
      ↪ prepare_data_and_create_model(molecular_descriptors_df=data,
      ↪
      ↪         correlation_threshold=0.50,
      ↪
      ↪         standardization=True,
      ↪
      ↪         model_type='KNeighborsRegressor',
      ↪
      ↪         target_column_name = target,
      ↪
      ↪         random_state=random_state,
      ↪
      ↪         train_test_split_=True,
      ↪
      ↪         verbose=True)
```

I am doing standardization...

|      | molecular descriptor name |            |                            |
|------|---------------------------|------------|----------------------------|
| 0    | AATSOZ                    |            |                            |
| 1    | AATSOare                  |            |                            |
| 2    | AATSOd                    |            |                            |
| 3    | AATSOdv                   |            |                            |
| 4    | AATSOi                    |            |                            |
|      | molecular descriptor name | corr_value |                            |
| 0    | AATSOZ                    | -0.022797  |                            |
| 1    | AATSOare                  | -0.139064  |                            |
| 2    | AATSOd                    | 0.027592   |                            |
| 3    | AATSOdv                   | -0.136049  |                            |
| 4    | AATSOi                    | 0.168958   |                            |
|      | molecular descriptor name | corr_value | absolute correlation value |
| 0    | AATSOZ                    | -0.022797  | 0.022797                   |
| 1    | AATSOare                  | -0.139064  | 0.139064                   |
| 2    | AATSOd                    | 0.027592   | 0.027592                   |
| 3    | AATSOdv                   | -0.136049  | 0.136049                   |
| 4    | AATSOi                    | 0.168958   | 0.168958                   |
|      | molecular descriptor name | corr_value | absolute correlation value |
| 226  | AMID_0                    | -0.557717  | 0.557717                   |
| 505  | EState_VSA5               | -0.534748  | 0.534748                   |
| 791  | MDEO-12                   | -0.555724  | 0.555724                   |
| 921  | SaasC                     | 0.513071   | 0.513071                   |
| 1091 | VSA_EState5               | 0.526082   | 0.526082                   |
|      | molecular descriptor name | corr_value | absolute correlation value |
| 226  | AMID_0                    | -0.557717  | 0.557717                   |
| 505  | EState_VSA5               | -0.534748  | 0.534748                   |

|      |             |           |          |
|------|-------------|-----------|----------|
| 791  | MDE0-12     | -0.555724 | 0.555724 |
| 921  | SaasC       | 0.513071  | 0.513071 |
| 1091 | VSA_EState5 | 0.526082  | 0.526082 |

The model used is: KNeighbors...

Return the coefficient of determination of the prediction:

0.7385820073958993

R<sup>2</sup> score: 0.5920842564446827

Correlation coefficient: 0.7694701140685599

Test data - unseen during training:

R<sup>2</sup> score: 0.7385820073958993

Correlation coefficient: 0.8594079400354055

```
[7.99503884 5.36315619 5.86699104 7.99067194 7.62074397 7.7994894
 8.04916244 7.62074397 7.8354149 8.28987278 6.48251944 7.97780679
 8.28987278 7.67599179 7.91842501 7.75521654 5.36946488 6.326328 ]
```

```
102    7.920819
38     6.019997
8      5.996841
109    7.886057
11     7.962574
51     7.886057
88     8.075721
21     7.325139
82     7.978811
98     7.481486
58     7.677781
64     8.537602
74     8.142668
103    8.397940
91     8.958607
43     7.823909
25     4.886525
30     6.009661
```

Name: A549, dtype: float64

Training Root Mean Square Error: 0.5962436633769816

Testing Root Mean Square Error: 0.5300073247180529

#### 4.1 Search inside correlation space

```
[32]: step = 0.01
initial_step = corr_low
last_step = corr_high
first_list = [x / 100.0 for x in range(int(initial_step*100),
    ↪int(last_step*100), int(step*100))]
second_list = []
third_list = []
fourth_l = []
fifth_l = []
```

```

f_list = []
for i in first_list:
    without_standardization, train_r2, test_r2, _, h_, target_column_name, \
    ↪ training_data_RMSE, test_data_RMSE = pred_model.
    ↪ prepare_data_and_create_model(molecular_descriptors_df = data,

    ↪ correlation_threshold = i,

    ↪ standardization = False,

    ↪ model_type = 'KNeighborsRegressor',

    ↪ target_column_name = target,

    ↪ random_state=random_state,

    ↪ train_test_split_ = True,

    ↪ verbose = False)
    second_list.append(train_r2)
    third_list.append(test_r2)
    fourth_l.append(training_data_RMSE)
    fifth_l.append(test_data_RMSE)
    f_list.append(len(h_))

```

File "C:\Users\aleks\anaconda3\envs\cheminf\_gpu\lib\site-packages\joblib\externals\loky\backend\context.py", line 217, in \_count\_physical\_cores  
raise ValueError(

```

[33]: df_without_standardization = pd.DataFrame(data=first_list, \
    ↪ columns=["Correlation threshold"])
df_without_standardization['Training data R^2 score'] = second_list
df_without_standardization['Test data R^2 score'] = third_list
df_without_standardization['Training RMSE'] = fourth_l
df_without_standardization['Test RMSE'] = fifth_l
df_without_standardization['Number of features'] = f_list

```

```

[34]: df_k_nearest = df_without_standardization.copy()
df_without_standardization

```

```

[34]: Correlation threshold  Training data R^2 score  Test data R^2 score  \
0                0.33          0.365578          0.403549
1                0.34          0.576594          0.678750
2                0.35          0.579578          0.683797
3                0.36          0.579087          0.683797
4                0.37          0.586911          0.675784

```

|    |      |          |          |
|----|------|----------|----------|
| 5  | 0.38 | 0.656357 | 0.725957 |
| 6  | 0.39 | 0.670313 | 0.656381 |
| 7  | 0.40 | 0.657352 | 0.400121 |
| 8  | 0.41 | 0.657352 | 0.400121 |
| 9  | 0.42 | 0.643987 | 0.438148 |
| 10 | 0.43 | 0.666988 | 0.371349 |
| 11 | 0.44 | 0.660508 | 0.370829 |
| 12 | 0.45 | 0.660508 | 0.370829 |
| 13 | 0.46 | 0.531770 | 0.798907 |
| 14 | 0.47 | 0.523515 | 0.795108 |
| 15 | 0.48 | 0.581962 | 0.830782 |
| 16 | 0.49 | 0.570531 | 0.740497 |
| 17 | 0.50 | 0.592084 | 0.738582 |
| 18 | 0.51 | 0.592084 | 0.738582 |
| 19 | 0.52 | 0.563023 | 0.648450 |
| 20 | 0.53 | 0.553936 | 0.654096 |

|    | Training RMSE | Test RMSE | Number of features |
|----|---------------|-----------|--------------------|
| 0  | 0.743580      | 0.800574  | 94                 |
| 1  | 0.607459      | 0.587537  | 79                 |
| 2  | 0.605315      | 0.582905  | 73                 |
| 3  | 0.605668      | 0.582905  | 68                 |
| 4  | 0.600012      | 0.590244  | 57                 |
| 5  | 0.547258      | 0.542654  | 47                 |
| 6  | 0.536030      | 0.607649  | 39                 |
| 7  | 0.546465      | 0.802871  | 31                 |
| 8  | 0.546465      | 0.802871  | 27                 |
| 9  | 0.557021      | 0.777007  | 22                 |
| 10 | 0.538727      | 0.821900  | 18                 |
| 11 | 0.543943      | 0.822240  | 16                 |
| 12 | 0.543943      | 0.822240  | 16                 |
| 13 | 0.638804      | 0.464850  | 13                 |
| 14 | 0.644411      | 0.469221  | 11                 |
| 15 | 0.603596      | 0.426420  | 8                  |
| 16 | 0.611793      | 0.528062  | 7                  |
| 17 | 0.596244      | 0.530007  | 5                  |
| 18 | 0.596244      | 0.530007  | 5                  |
| 19 | 0.617118      | 0.614621  | 4                  |
| 20 | 0.623501      | 0.609666  | 3                  |

## 4.2 Plots

```
[35]: plt.plot(df_without_standardization['Correlation threshold'],  
             ↪df_without_standardization['Training data R^2 score'], label = "Training  
             ↪data R^2 score", marker='v')
```

```
plt.plot(df_without_standardization['Correlation threshold'],  
         df_without_standardization['Test data R^2 score'], label = "Test data R^2  
         score", marker='D')  
plt.legend()  
plt.xlabel('Correlation threshold')  
plt.ylabel('R^2 score')  
plt.ylim([0, 1])  
plt.show()
```

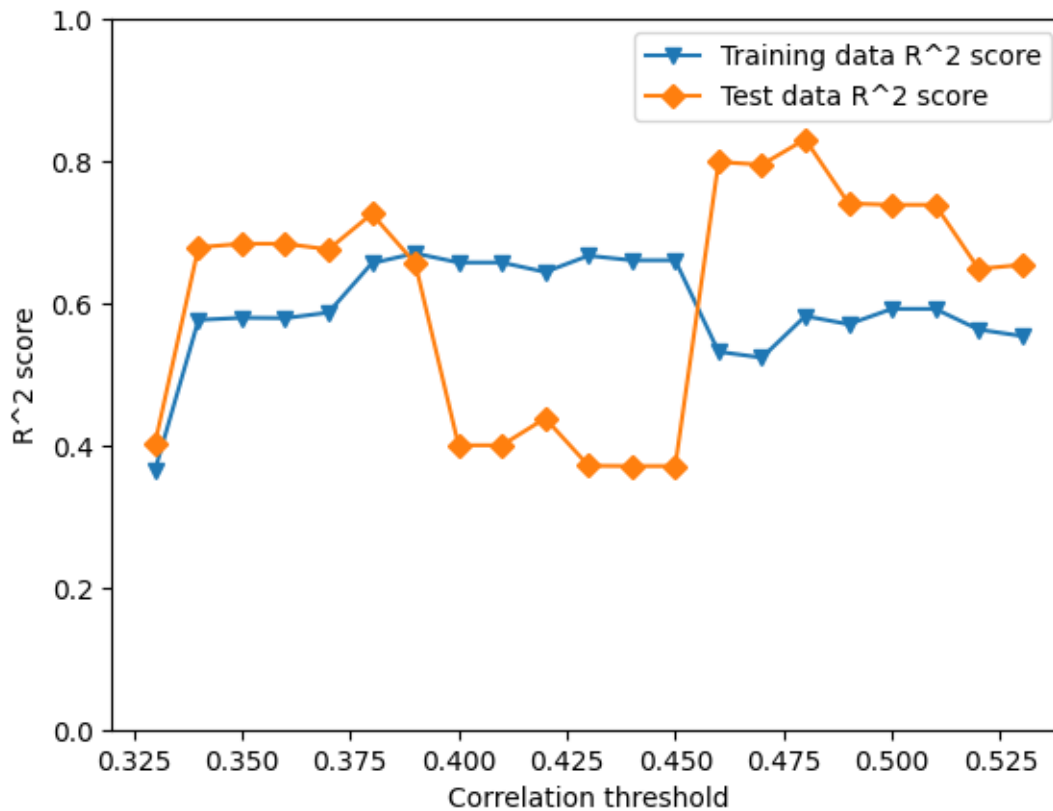

```
[36]: plt.plot(df_without_standardization['Correlation threshold'],  
              df_without_standardization['Number of features'], label = "Number of  
              features", marker='.')  
plt.legend()  
plt.xlabel('Correlation threshold')  
plt.ylabel('Number of features')  
plt.show()
```

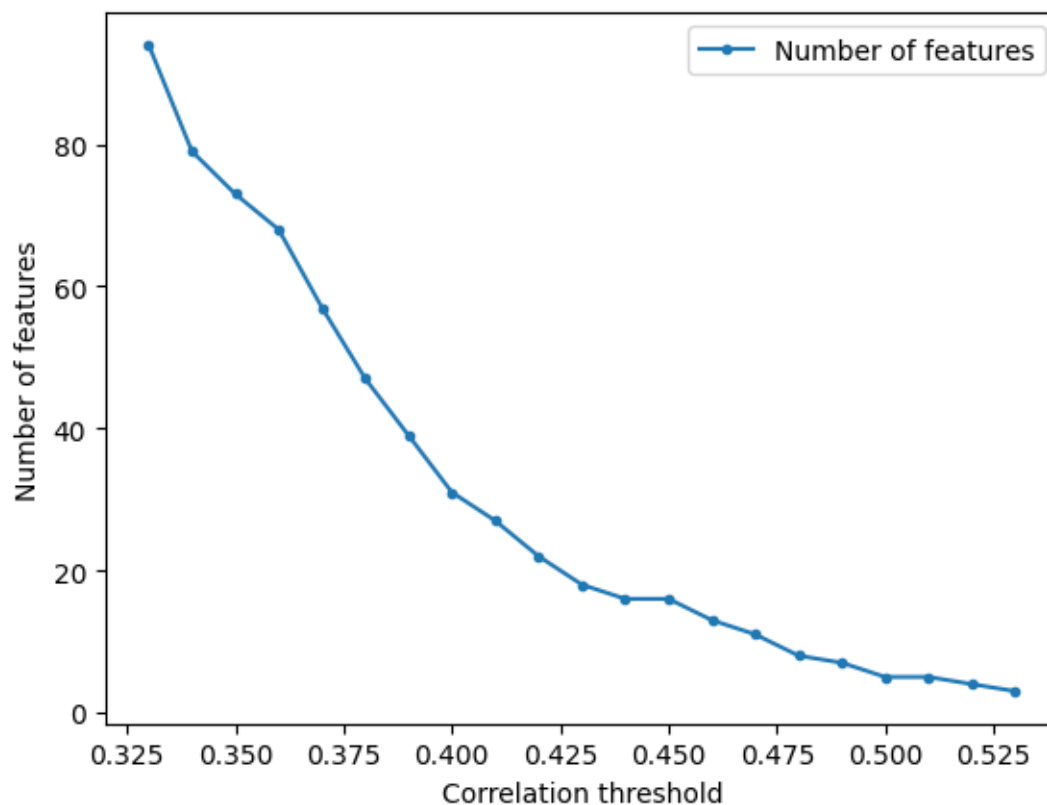

[ ]:

## 5 Support Vector Machines (SVM)

```
[37]: without_standardization, train_r2_, test_r2_, hist1, hist2, target_column_name,
      ↪ training_data_RMSE, test_data_RMSE = pred_model.
      ↪ prepare_data_and_create_model(molecular_descriptors_df=data,
      ↪
      ↪         correlation_threshold=0.50,
      ↪
      ↪         standardization=False,
      ↪
      ↪         model_type='SVR',
      ↪
      ↪         kernel_ = 'linear',
      ↪
      ↪         gamma_ = 'auto',
      ↪
      ↪         target_column_name = target,
```



```

↪          random_state=random_state,
↪          train_test_split_=True,
↪          verbose=True)

```

I am not doing standardization...

|   | molecular descriptor name |  |
|---|---------------------------|--|
| 0 | AATSOZ                    |  |
| 1 | AATSOare                  |  |
| 2 | AATSOd                    |  |
| 3 | AATSOdv                   |  |
| 4 | AATSOi                    |  |

  

|   | molecular descriptor name | corr_value |
|---|---------------------------|------------|
| 0 | AATSOZ                    | -0.022797  |
| 1 | AATSOare                  | -0.139064  |
| 2 | AATSOd                    | 0.027592   |
| 3 | AATSOdv                   | -0.136049  |
| 4 | AATSOi                    | 0.168958   |

  

|   | molecular descriptor name | corr_value | absolute correlation value |
|---|---------------------------|------------|----------------------------|
| 0 | AATSOZ                    | -0.022797  | 0.022797                   |
| 1 | AATSOare                  | -0.139064  | 0.139064                   |
| 2 | AATSOd                    | 0.027592   | 0.027592                   |
| 3 | AATSOdv                   | -0.136049  | 0.136049                   |
| 4 | AATSOi                    | 0.168958   | 0.168958                   |

  

|      | molecular descriptor name | corr_value | absolute correlation value |
|------|---------------------------|------------|----------------------------|
| 226  | AMID_0                    | -0.557717  | 0.557717                   |
| 505  | EState_VSA5               | -0.534748  | 0.534748                   |
| 791  | MDEO-12                   | -0.555724  | 0.555724                   |
| 921  | SaasC                     | 0.513071   | 0.513071                   |
| 1091 | VSA_EState5               | 0.526082   | 0.526082                   |

  

|      | molecular descriptor name | corr_value | absolute correlation value |
|------|---------------------------|------------|----------------------------|
| 226  | AMID_0                    | -0.557717  | 0.557717                   |
| 505  | EState_VSA5               | -0.534748  | 0.534748                   |
| 791  | MDEO-12                   | -0.555724  | 0.555724                   |
| 921  | SaasC                     | 0.513071   | 0.513071                   |
| 1091 | VSA_EState5               | 0.526082   | 0.526082                   |

The model used is: SVR...

Return the coefficient of determination of the prediction:

0.5885571370707737

R<sup>2</sup> score: 0.4153462878154097

Correlation coefficient: 0.6444736517619706

Test data - unseen during training:

R<sup>2</sup> score: 0.5885571370707737

Correlation coefficient: 0.7671747760913245

[7.78405904 6.26070156 7.24434095 7.90858847 7.99063574 8.18591758

```

8.16006148 8.00461122 8.02839849 7.60464728 6.66113788 7.62701574
7.61098367 7.84099337 8.2343655 8.08338059 6.52621018 6.11715821]
102    7.920819
38     6.019997
8      5.996841
109    7.886057
11     7.962574
51     7.886057
88     8.075721
21     7.325139
82     7.978811
98     7.481486
58     7.677781
64     8.537602
74     8.142668
103    8.397940
91     8.958607
43     7.823909
25     4.886525
30     6.009661

```

Name: A549, dtype: float64

Training Root Mean Square Error: 0.7138186632786595

Testing Root Mean Square Error: 0.6649192410798268

```

[38]: print(target_column_name+str('_transformed'))
      print(hist1[target_column_name].hist())

```

A549\_transformed

AxesSubplot(0.125,0.11;0.775x0.77)



```
[39]: with_standardization, train_r2_, test_r2_, hist1, hist2, target_column_name,
      ↪ training_data_RMSE, test_data_RMSE = pred_model.
      ↪ prepare_data_and_create_model(molecular_descriptors_df=data,
      ↪
      ↪         correlation_threshold=0.50,
      ↪
      ↪         standardization=True,
      ↪
      ↪         model_type='SVR',
      ↪
      ↪         kernel_ = 'linear',
      ↪
      ↪         gamma_ = 'auto',
      ↪
      ↪         target_column_name = target,
      ↪
      ↪         random_state=random_state,
      ↪
      ↪         train_test_split_=True,
      ↪
      ↪         verbose=True)
```

I am doing standardization...

molecular descriptor name

|   |          |
|---|----------|
| 0 | AATSOZ   |
| 1 | AATSOare |
| 2 | AATSOd   |
| 3 | AATSOdv  |
| 4 | AATSOi   |

|   | molecular descriptor name | corr_value |
|---|---------------------------|------------|
| 0 | AATSOZ                    | -0.022797  |
| 1 | AATSOare                  | -0.139064  |
| 2 | AATSOd                    | 0.027592   |
| 3 | AATSOdv                   | -0.136049  |
| 4 | AATSOi                    | 0.168958   |

|   | molecular descriptor name | corr_value | absolute correlation value |
|---|---------------------------|------------|----------------------------|
| 0 | AATSOZ                    | -0.022797  | 0.022797                   |
| 1 | AATSOare                  | -0.139064  | 0.139064                   |
| 2 | AATSOd                    | 0.027592   | 0.027592                   |
| 3 | AATSOdv                   | -0.136049  | 0.136049                   |
| 4 | AATSOi                    | 0.168958   | 0.168958                   |

|      | molecular descriptor name | corr_value | absolute correlation value |
|------|---------------------------|------------|----------------------------|
| 226  | AMID_0                    | -0.557717  | 0.557717                   |
| 505  | EState_VSA5               | -0.534748  | 0.534748                   |
| 791  | MDEO-12                   | -0.555724  | 0.555724                   |
| 921  | SaasC                     | 0.513071   | 0.513071                   |
| 1091 | VSA_EState5               | 0.526082   | 0.526082                   |

|      | molecular descriptor name | corr_value | absolute correlation value |
|------|---------------------------|------------|----------------------------|
| 226  | AMID_0                    | -0.557717  | 0.557717                   |
| 505  | EState_VSA5               | -0.534748  | 0.534748                   |
| 791  | MDEO-12                   | -0.555724  | 0.555724                   |
| 921  | SaasC                     | 0.513071   | 0.513071                   |
| 1091 | VSA_EState5               | 0.526082   | 0.526082                   |

The model used is: SVR...

Return the coefficient of determination of the prediction:

0.5885571370707737

R<sup>2</sup> score: 0.4153462878154097

Correlation coefficient: 0.6444736517619706

Test data - unseen during training:

R<sup>2</sup> score: 0.5885571370707737

Correlation coefficient: 0.7671747760913245

[7.78405904 6.26070156 7.24434095 7.90858847 7.99063574 8.18591758  
8.16006148 8.00461122 8.02839849 7.60464728 6.66113788 7.62701574  
7.61098367 7.84099337 8.2343655 8.08338059 6.52621018 6.11715821]

|     |          |
|-----|----------|
| 102 | 7.920819 |
| 38  | 6.019997 |
| 8   | 5.996841 |
| 109 | 7.886057 |
| 11  | 7.962574 |
| 51  | 7.886057 |

```

88      8.075721
21      7.325139
82      7.978811
98      7.481486
58      7.677781
64      8.537602
74      8.142668
103     8.397940
91      8.958607
43      7.823909
25      4.886525
30      6.009661
Name: A549, dtype: float64
Training Root Mean Square Error: 0.7138186632786595
Testing Root Mean Square Error: 0.6649192410798268

```

## 5.1 Search inside correlation space

```

[40]: step = 0.01
      initial_step = corr_low
      last_step = corr_high
      first_list = [x / 100.0 for x in range(int(initial_step*100),
      ↪int(last_step*100), int(step*100))]
      second_list = []
      third_list = []
      fourth_l = []
      fifth_l = []
      f_list = []
      for i in first_list:
          without_standardization, train_r2, test_r2, _, h_, target_column_name,
          ↪training_data_RMSE, test_data_RMSE = pred_model.
          ↪prepare_data_and_create_model(molecular_descriptors_df = data,

          ↪
          ↪correlation_threshold = i,
          ↪
          ↪standardization = False,
          ↪
          ↪model_type = 'SVR',
          ↪
          ↪kernel_ = 'linear',
          ↪
          ↪gamma_ = 'auto',
          ↪
          ↪target_column_name = target,
          ↪
          ↪random_state=random_state,

```

```

    ↪          train_test_split_ = True,

    ↪          verbose = False)
second_list.append(train_r2)
third_list.append(test_r2)
fourth_l.append(training_data_RMSE)
fifth_l.append(test_data_RMSE)
f_list.append(len(h_))

```

```

[41]: df_without_standardization = pd.DataFrame(data=first_list,
    ↪columns=["Correlation threshold"])
df_without_standardization['Training data R^2 score'] = second_list
df_without_standardization['Test data R^2 score'] = third_list
df_without_standardization['Training RMSE'] = fourth_l
df_without_standardization['Test RMSE'] = fifth_l
df_without_standardization['Number of features'] = f_list

```

```

[42]: df_svm = df_without_standardization.copy()
df_without_standardization

```

```

[42]:
Correlation threshold  Training data R^2 score  Test data R^2 score  \
0                    0.33                    0.757913          0.743592
1                    0.34                    0.702054          0.667643
2                    0.35                    0.698608          0.647828
3                    0.36                    0.650943          0.556002
4                    0.37                    0.646026          0.464720
5                    0.38                    0.605983          0.607521
6                    0.39                    0.582467          0.589989
7                    0.40                    0.555130          0.573021
8                    0.41                    0.544207          0.560628
9                    0.42                    0.533739          0.545440
10                   0.43                    0.539155          0.586383
11                   0.44                    0.530397          0.596339
12                   0.45                    0.530397          0.596339
13                   0.46                    0.526020          0.585876
14                   0.47                    0.514480          0.587514
15                   0.48                    0.477323          0.463741
16                   0.49                    0.427488          0.538032
17                   0.50                    0.415346          0.588557
18                   0.51                    0.415346          0.588557
19                   0.52                    0.424873          0.519240
20                   0.53                    0.400334          0.538101

Training RMSE  Test RMSE  Number of features
0          0.459330    0.524904              94
1          0.509574    0.597608              79

```

|    |          |          |    |
|----|----------|----------|----|
| 2  | 0.512512 | 0.615165 | 73 |
| 3  | 0.551552 | 0.690724 | 68 |
| 4  | 0.555423 | 0.758411 | 57 |
| 5  | 0.585998 | 0.649415 | 47 |
| 6  | 0.603231 | 0.663761 | 39 |
| 7  | 0.622666 | 0.677356 | 31 |
| 8  | 0.630264 | 0.687116 | 27 |
| 9  | 0.637460 | 0.698891 | 22 |
| 10 | 0.633747 | 0.666674 | 18 |
| 11 | 0.639741 | 0.658601 | 16 |
| 12 | 0.639741 | 0.658601 | 16 |
| 13 | 0.642715 | 0.667082 | 13 |
| 14 | 0.650492 | 0.665762 | 11 |
| 15 | 0.674924 | 0.759104 | 8  |
| 16 | 0.706368 | 0.704564 | 7  |
| 17 | 0.713819 | 0.664919 | 5  |
| 18 | 0.713819 | 0.664919 | 5  |
| 19 | 0.707979 | 0.718750 | 4  |
| 20 | 0.722925 | 0.704510 | 3  |

## 5.2 Plots

```
[43]: plt.plot(df_without_standardization['Correlation threshold'],
    ↪df_without_standardization['Training data R^2 score'], label = "Training
    ↪data R^2 score", marker='v')
plt.plot(df_without_standardization['Correlation threshold'],
    ↪df_without_standardization['Test data R^2 score'], label = "Test data R^2
    ↪score", marker='D')
plt.legend()
plt.xlabel('Correlation threshold')
plt.ylabel('R^2 score')
plt.ylim([0, 1])
plt.show()
```

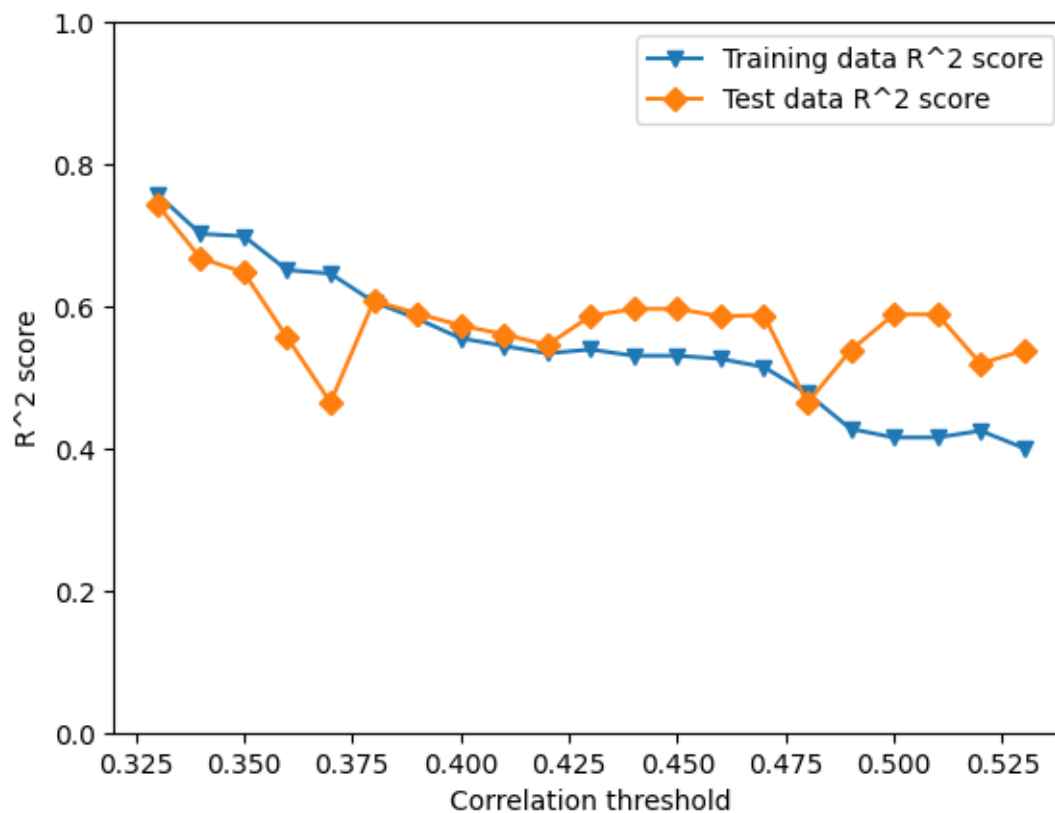

```
[44]: plt.plot(df_without_standardization['Correlation threshold'],  
             df_without_standardization['Number of features'], label = "Number of  
             features", marker='.')  
plt.legend()  
plt.xlabel('Correlation threshold')  
plt.ylabel('Number of features')  
plt.show()
```



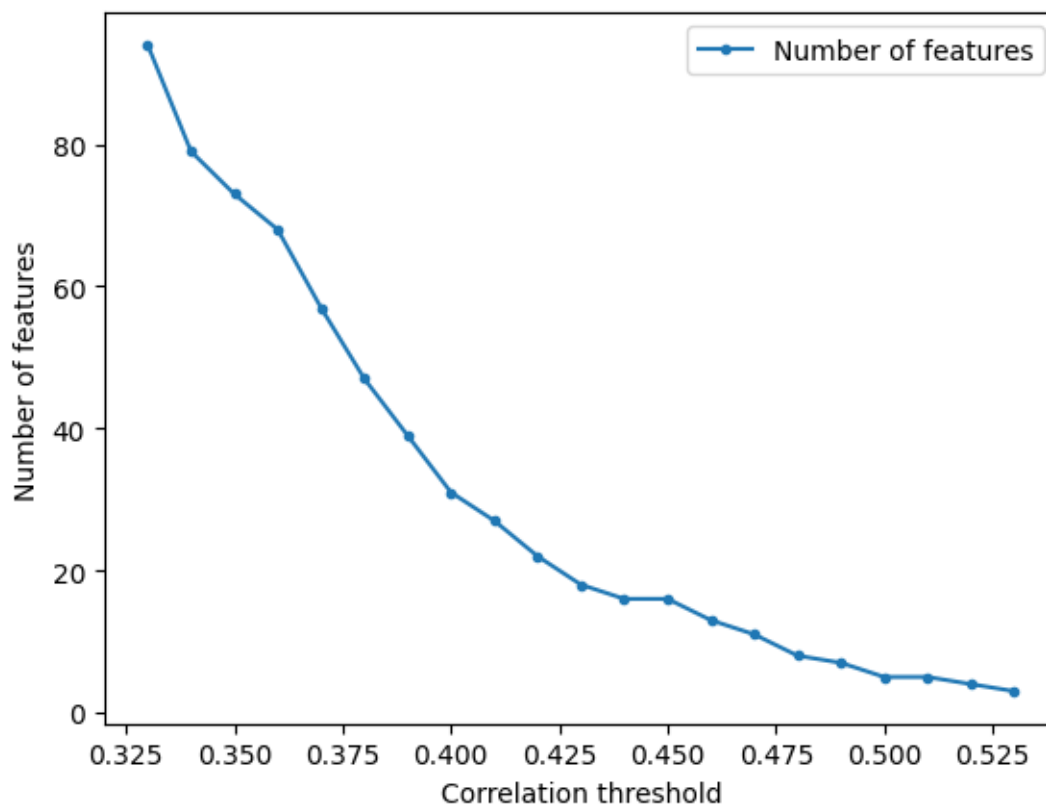

### 5.3 Store quality measurements

```
[45]: with pd.ExcelWriter('../Data/Quality_'+str(target)+'_'+str(random_state)+'_'.  
      ↪ 'xlsx') as writer:  
      df_linear.to_excel(writer, sheet_name='MLR')  
      df_decision_tree.to_excel(writer, sheet_name='DT')  
      df_random_forest.to_excel(writer, sheet_name='RF')  
      df_k_nearest.to_excel(writer, sheet_name='KNN')  
      df_svm.to_excel(writer, sheet_name='SVM')
```

# Notebook

January 18, 2024

## 1 File 16

```
[1]: import sys
from pathlib import Path
prediction_mode_path = Path("../module")
sys.path.append(prediction_mode_path.as_posix())
import models_creation as pred_model

import pandas as pd
import numpy as np

from sklearn.metrics import r2_score

import matplotlib.pyplot as plt
from sklearn.tree import plot_tree

from matplotlib import pyplot as plt

import joblib

import warnings
warnings.filterwarnings('ignore')
```

```
[2]: load_prepared_data = pd.read_excel('../Data/Kolchicyna_machine_learning.xlsx')
load_prepared_data = load_prepared_data.drop(columns=['Unnamed: 0'])

target = 'A549'

corr_low = 0.33
corr_high = 0.54

random_state = 28
```

```
[3]: load_prepared_data.head()
```

```
[3]:
```

|   | AATSOZ    | AATSOare | AATSOd   | AATSOdv  | AATSOi     | AATSOm    | AATSOp   | \ |
|---|-----------|----------|----------|----------|------------|-----------|----------|---|
| 0 | 25.090909 | 6.046518 | 3.109091 | 6.662626 | 160.775045 | 99.075564 | 1.555512 |   |
| 1 | 24.448276 | 6.008422 | 3.051724 | 6.386973 | 161.021674 | 96.473315 | 1.538471 |   |

|   |           |          |          |          |            |           |          |
|---|-----------|----------|----------|----------|------------|-----------|----------|
| 2 | 23.868852 | 5.974074 | 3.000000 | 6.138434 | 161.244045 | 94.127025 | 1.523105 |
| 3 | 23.868852 | 5.974074 | 3.032787 | 6.171220 | 161.244045 | 94.127025 | 1.523105 |
| 4 | 23.343750 | 5.942945 | 2.953125 | 5.913194 | 161.445569 | 92.000700 | 1.509180 |

|   | AATS0pe  | AATS0s   | AATS0se  | ... | A549_float | MCF-7_float | LoVo_float | \ |
|---|----------|----------|----------|-----|------------|-------------|------------|---|
| 0 | 6.126680 | 3.435416 | 7.629859 | ... | 10.8       | 10.3        | 6.5        |   |
| 1 | 6.088791 | 3.330998 | 7.596891 | ... | 11.6       | 12.0        | 8.5        |   |
| 2 | 6.054630 | 3.236850 | 7.567166 | ... | 10.9       | 12.2        | 8.8        |   |
| 3 | 6.054630 | 3.257798 | 7.567166 | ... | 10.5       | 11.3        | 8.5        |   |
| 4 | 6.023670 | 3.151529 | 7.540228 | ... | 89.5       | 92.7        | 52.8       |   |

|   | LoVo/DX_float | BALB/3T3_float | A549_float_transformed | \ |
|---|---------------|----------------|------------------------|---|
| 0 | 54.9          | 10.2           | 7.966576               |   |
| 1 | 31.1          | 14.3           | 7.935542               |   |
| 2 | 17.9          | 11.7           | 7.962574               |   |
| 3 | 10.2          | 11.0           | 7.978811               |   |
| 4 | 77.8          | 99.4           | 7.048177               |   |

|   | MCF-7_float_transformed | LoVo_float_transformed | LoVo/DX_float_transformed | \ |
|---|-------------------------|------------------------|---------------------------|---|
| 0 | 7.987163                | 8.187087               | 7.260428                  |   |
| 1 | 7.920819                | 8.070581               | 7.507240                  |   |
| 2 | 7.913640                | 8.055517               | 7.747147                  |   |
| 3 | 7.946922                | 8.070581               | 7.991400                  |   |
| 4 | 7.032920                | 7.277366               | 7.109020                  |   |

|   | BALB/3T3_float_transformed |
|---|----------------------------|
| 0 | 7.991400                   |
| 1 | 7.844664                   |
| 2 | 7.931814                   |
| 3 | 7.958607                   |
| 4 | 7.002614                   |

[5 rows x 1221 columns]

```
[4]: data = load_prepared_data[list(load_prepared_data.columns)[0:-10]]
data[target] = load_prepared_data[load_prepared_data.columns[-5]]
data.head()
```

|   | AATS0Z    | AATS0are | AATS0d   | AATS0dv  | AATS0i     | AATS0m    | AATS0p   | \ |
|---|-----------|----------|----------|----------|------------|-----------|----------|---|
| 0 | 25.090909 | 6.046518 | 3.109091 | 6.662626 | 160.775045 | 99.075564 | 1.555512 |   |
| 1 | 24.448276 | 6.008422 | 3.051724 | 6.386973 | 161.021674 | 96.473315 | 1.538471 |   |
| 2 | 23.868852 | 5.974074 | 3.000000 | 6.138434 | 161.244045 | 94.127025 | 1.523105 |   |
| 3 | 23.868852 | 5.974074 | 3.032787 | 6.171220 | 161.244045 | 94.127025 | 1.523105 |   |
| 4 | 23.343750 | 5.942945 | 2.953125 | 5.913194 | 161.445569 | 92.000700 | 1.509180 |   |

|   | AATS0pe  | AATS0s   | AATS0se  | ... | piPC10   | piPC2    | piPC3    | piPC4    | \ |
|---|----------|----------|----------|-----|----------|----------|----------|----------|---|
| 0 | 6.126680 | 3.435416 | 7.629859 | ... | 7.999655 | 4.266195 | 4.915408 | 5.516700 |   |

|   |          |          |          |     |          |          |          |          |
|---|----------|----------|----------|-----|----------|----------|----------|----------|
| 1 | 6.088791 | 3.330998 | 7.596891 | ... | 8.018726 | 4.280132 | 4.922714 | 5.520711 |
| 2 | 6.054630 | 3.236850 | 7.567166 | ... | 8.028799 | 4.293878 | 4.929967 | 5.524706 |
| 3 | 6.054630 | 3.257798 | 7.567166 | ... | 8.037440 | 4.307438 | 4.929967 | 5.524706 |
| 4 | 6.023670 | 3.151529 | 7.540228 | ... | 8.034892 | 4.307438 | 4.937168 | 5.528685 |

|   | piPC5    | piPC6    | piPC7    | piPC8    | piPC9    | A549     |
|---|----------|----------|----------|----------|----------|----------|
| 0 | 6.098566 | 6.595759 | 6.979116 | 7.337313 | 7.681445 | 7.966576 |
| 1 | 6.103048 | 6.601209 | 6.985613 | 7.349442 | 7.695531 | 7.935542 |
| 2 | 6.105281 | 6.603923 | 6.989306 | 7.353932 | 7.704023 | 7.962574 |
| 3 | 6.107510 | 6.606629 | 6.992068 | 7.361425 | 7.709420 | 7.978811 |
| 4 | 6.107510 | 6.605277 | 6.991148 | 7.356489 | 7.707175 | 7.048177 |

[5 rows x 1212 columns]

## 2 Multiple Linear regression (MLR)

```
[5]: without_standardization, train_r2_, test_r2_, hist1, hist2, target_column_name,
      ↪ training_data_RMSE, test_data_RMSE = pred_model.
      ↪ prepare_data_and_create_model(molecular_descriptors_df=data,
      ↪
      ↪ correlation_threshold=0.5,
      ↪
      ↪ standardization=False,
      ↪
      ↪ model_type='linear_model',
      ↪
      ↪ target_column_name = str(target),
      ↪
      ↪ random_state=random_state,
      ↪
      ↪ train_test_split_=True,
      ↪
      ↪ verbose=True)
```

I am not doing standardization...

|   | molecular descriptor name |            |
|---|---------------------------|------------|
| 0 | AATS0Z                    |            |
| 1 | AATS0are                  |            |
| 2 | AATS0d                    |            |
| 3 | AATS0dv                   |            |
| 4 | AATS0i                    |            |
|   | molecular descriptor name | corr_value |
| 0 | AATS0Z                    | -0.022797  |
| 1 | AATS0are                  | -0.139064  |
| 2 | AATS0d                    | 0.027592   |
| 3 | AATS0dv                   | -0.136049  |

|      |                           |            |                            |
|------|---------------------------|------------|----------------------------|
| 4    | AATSOi                    | 0.168958   |                            |
|      | molecular descriptor name | corr_value | absolute correlation value |
| 0    | AATSOZ                    | -0.022797  | 0.022797                   |
| 1    | AATSOare                  | -0.139064  | 0.139064                   |
| 2    | AATSOd                    | 0.027592   | 0.027592                   |
| 3    | AATSOdv                   | -0.136049  | 0.136049                   |
| 4    | AATSOi                    | 0.168958   | 0.168958                   |
|      | molecular descriptor name | corr_value | absolute correlation value |
| 226  | AMID_0                    | -0.557717  | 0.557717                   |
| 505  | EState_VSA5               | -0.534748  | 0.534748                   |
| 791  | MDEO-12                   | -0.555724  | 0.555724                   |
| 921  | SaasC                     | 0.513071   | 0.513071                   |
| 1091 | VSA_EState5               | 0.526082   | 0.526082                   |
|      | molecular descriptor name | corr_value | absolute correlation value |
| 226  | AMID_0                    | -0.557717  | 0.557717                   |
| 505  | EState_VSA5               | -0.534748  | 0.534748                   |
| 791  | MDEO-12                   | -0.555724  | 0.555724                   |
| 921  | SaasC                     | 0.513071   | 0.513071                   |
| 1091 | VSA_EState5               | 0.526082   | 0.526082                   |

The model used is: LinearReg..

Return the coefficient of determination of the prediction:

0.3263597901499842

R<sup>2</sup> score: 0.5008978125943887

Correlation coefficient: 0.7077413458279718

Test data - unseen during training:

R<sup>2</sup> score: 0.3263597901499842

Correlation coefficient: 0.5712790825419606

[8.17050812 6.41656195 7.51260775 6.65848085 7.9580164 7.32723458  
7.55473012 8.29466015 6.92867321 7.59751174 7.65932317 7.99323287  
7.80547787 7.31200666 7.3326104 6.53208066 7.98252888 6.66784957]

113 7.823909  
35 6.053057  
101 6.721246  
36 6.221126  
100 7.130768  
13 7.966576  
0 7.966576  
114 7.920819  
104 8.309804  
96 7.102373  
40 7.920819  
103 8.397940  
48 7.853872  
39 8.356547  
14 8.148742  
117 6.031517  
21 7.325139  
9 6.818728

Name: A549, dtype: float64

Training Root Mean Square Error: 0.6900454953161479

Testing Root Mean Square Error: 0.637795296583113

```
[6]: print(target_column_name+str('_transformed'))  
      print(hist1[target_column_name].hist())
```

A549\_transformed

AxesSubplot(0.125,0.11;0.775x0.77)



```
[7]: with_standardization, train_r2_, test_r2_, hist1, hist2, target_column_name,   
      ↪ training_data_RMSE, test_data_RMSE = pred_model.  
      ↪ prepare_data_and_create_model(molecular_descriptors_df=data,  
  
      ↪ correlation_threshold=0.50,  
  
      ↪ standardization=True,  
  
      ↪ model_type='linear_model',  
  
      ↪ target_column_name = target,
```

```

↪         random_state=random_state,
↪
↪         train_test_split_=True,
↪
↪         verbose=True)

```

I am doing standardization...

|   | molecular descriptor name |  |
|---|---------------------------|--|
| 0 | AATSOZ                    |  |
| 1 | AATSOare                  |  |
| 2 | AATSOd                    |  |
| 3 | AATSOdv                   |  |
| 4 | AATSOi                    |  |

  

|   | molecular descriptor name | corr_value |
|---|---------------------------|------------|
| 0 | AATSOZ                    | -0.022797  |
| 1 | AATSOare                  | -0.139064  |
| 2 | AATSOd                    | 0.027592   |
| 3 | AATSOdv                   | -0.136049  |
| 4 | AATSOi                    | 0.168958   |

  

|   | molecular descriptor name | corr_value | absolute correlation value |
|---|---------------------------|------------|----------------------------|
| 0 | AATSOZ                    | -0.022797  | 0.022797                   |
| 1 | AATSOare                  | -0.139064  | 0.139064                   |
| 2 | AATSOd                    | 0.027592   | 0.027592                   |
| 3 | AATSOdv                   | -0.136049  | 0.136049                   |
| 4 | AATSOi                    | 0.168958   | 0.168958                   |

  

|      | molecular descriptor name | corr_value | absolute correlation value |
|------|---------------------------|------------|----------------------------|
| 226  | AMID_0                    | -0.557717  | 0.557717                   |
| 505  | EState_VSA5               | -0.534748  | 0.534748                   |
| 791  | MDEO-12                   | -0.555724  | 0.555724                   |
| 921  | SaasC                     | 0.513071   | 0.513071                   |
| 1091 | VSA_EState5               | 0.526082   | 0.526082                   |

  

|      | molecular descriptor name | corr_value | absolute correlation value |
|------|---------------------------|------------|----------------------------|
| 226  | AMID_0                    | -0.557717  | 0.557717                   |
| 505  | EState_VSA5               | -0.534748  | 0.534748                   |
| 791  | MDEO-12                   | -0.555724  | 0.555724                   |
| 921  | SaasC                     | 0.513071   | 0.513071                   |
| 1091 | VSA_EState5               | 0.526082   | 0.526082                   |

The model used is: LinearReg..

Return the coefficient of determination of the prediction:

0.3263597901499842

R<sup>2</sup> score: 0.5008978125943887

Correlation coefficient: 0.7077413458279718

Test data - unseen during training:

R<sup>2</sup> score: 0.3263597901499842

Correlation coefficient: 0.5712790825419606

[8.17050812 6.41656195 7.51260775 6.65848085 7.9580164 7.32723458

```

7.55473012 8.29466015 6.92867321 7.59751174 7.65932317 7.99323287
7.80547787 7.31200666 7.3326104 6.53208066 7.98252888 6.66784957]
113    7.823909
35     6.053057
101    6.721246
36     6.221126
100    7.130768
13     7.966576
0      7.966576
114    7.920819
104    8.309804
96     7.102373
40     7.920819
103    8.397940
48     7.853872
39     8.356547
14     8.148742
117    6.031517
21     7.325139
9      6.818728
Name: A549, dtype: float64
Training Root Mean Square Error: 0.6900454953161479
Testing Root Mean Square Error: 0.637795296583113

```

## 2.1 Search inside correlation space

```

[8]: step = 0.01
initial_step = corr_low
last_step = corr_high
first_list = [x / 100.0 for x in range(int(initial_step*100),
    ↪int(last_step*100), int(step*100))]
second_list = []
third_list = []
fourth_l = []
fifth_l = []
f_list = []
for i in first_list:
    without_standardization, train_r2, test_r2, _, h_, target_column_name,
    ↪training_data_RMSE, test_data_RMSE = pred_model.
    ↪prepare_data_and_create_model(molecular_descriptors_df = data,

    ↪
        correlation_threshold = i,

    ↪
        standardization = False,

    ↪
        model_type = 'linear_model',

```



```

    ↪          target_column_name = target,
    ↪          random_state=random_state,
    ↪          train_test_split_ = True,
    ↪          verbose = False)
second_list.append(train_r2)
third_list.append(test_r2)
fourth_l.append(training_data_RMSE)
fifth_l.append(test_data_RMSE)
f_list.append(len(h_))

```

```

[9]: df_without_standardization = pd.DataFrame(data=first_list,
    ↪columns=["Correlation threshold"])
df_without_standardization['Training data R^2 score'] = second_list
df_without_standardization['Test data R^2 score'] = third_list
df_without_standardization['Training RMSE'] = fourth_l
df_without_standardization['Test RMSE'] = fifth_l
df_without_standardization['Number of features'] = f_list

```

```

[10]: df_linear = df_without_standardization.copy()
df_without_standardization

```

```

[10]:
Correlation threshold  Training data R^2 score  Test data R^2 score  \
0                    0.33                0.988674          -5.539361
1                    0.34                0.971113          -1.646468
2                    0.35                0.959683          -0.619875
3                    0.36                0.933406          -0.488174
4                    0.37                0.914824          -0.459014
5                    0.38                0.886734          -0.098428
6                    0.39                0.816081           0.157274
7                    0.40                0.712155          -0.031857
8                    0.41                0.710437          -0.029820
9                    0.42                0.667863          -0.158184
10                   0.43                0.653445          -0.050300
11                   0.44                0.634097           0.091773
12                   0.45                0.634097           0.091773
13                   0.46                0.607476           0.156489
14                   0.47                0.567309           0.443574
15                   0.48                0.538457           0.426137
16                   0.49                0.511387           0.356796
17                   0.50                0.500898           0.326360
18                   0.51                0.500898           0.326360
19                   0.52                0.500883           0.328066
20                   0.53                0.489652           0.256984

```

|    | Training RMSE | Test RMSE | Number of features |
|----|---------------|-----------|--------------------|
| 0  | 0.103949      | 1.987170  | 94                 |
| 1  | 0.166010      | 1.264156  | 79                 |
| 2  | 0.196122      | 0.989027  | 73                 |
| 3  | 0.252059      | 0.947969  | 68                 |
| 4  | 0.285064      | 0.938636  | 57                 |
| 5  | 0.328725      | 0.814429  | 47                 |
| 6  | 0.418886      | 0.713363  | 39                 |
| 7  | 0.524037      | 0.789364  | 31                 |
| 8  | 0.525599      | 0.788584  | 27                 |
| 9  | 0.562914      | 0.836288  | 22                 |
| 10 | 0.575002      | 0.796387  | 18                 |
| 11 | 0.590834      | 0.740567  | 16                 |
| 12 | 0.590834      | 0.740567  | 16                 |
| 13 | 0.611950      | 0.713695  | 13                 |
| 14 | 0.642498      | 0.579657  | 11                 |
| 15 | 0.663573      | 0.588669  | 8                  |
| 16 | 0.682756      | 0.623220  | 7                  |
| 17 | 0.690045      | 0.637795  | 5                  |
| 18 | 0.690045      | 0.637795  | 5                  |
| 19 | 0.690056      | 0.636987  | 4                  |
| 20 | 0.697776      | 0.669833  | 3                  |

[ ]:

## 2.2 Plots

```
[11]: plt.plot(df_without_standardization['Correlation threshold'],
↳df_without_standardization['Training data R^2 score'], label = "Training_
↳data R^2 score", marker='v')
plt.plot(df_without_standardization['Correlation threshold'],
↳df_without_standardization['Test data R^2 score'], label = "Test data R^2_
↳score", marker='D')
plt.legend()
plt.xlabel('Correlation threshold')
plt.ylabel('R^2 score')
plt.ylim([0, 1])
plt.show()
```

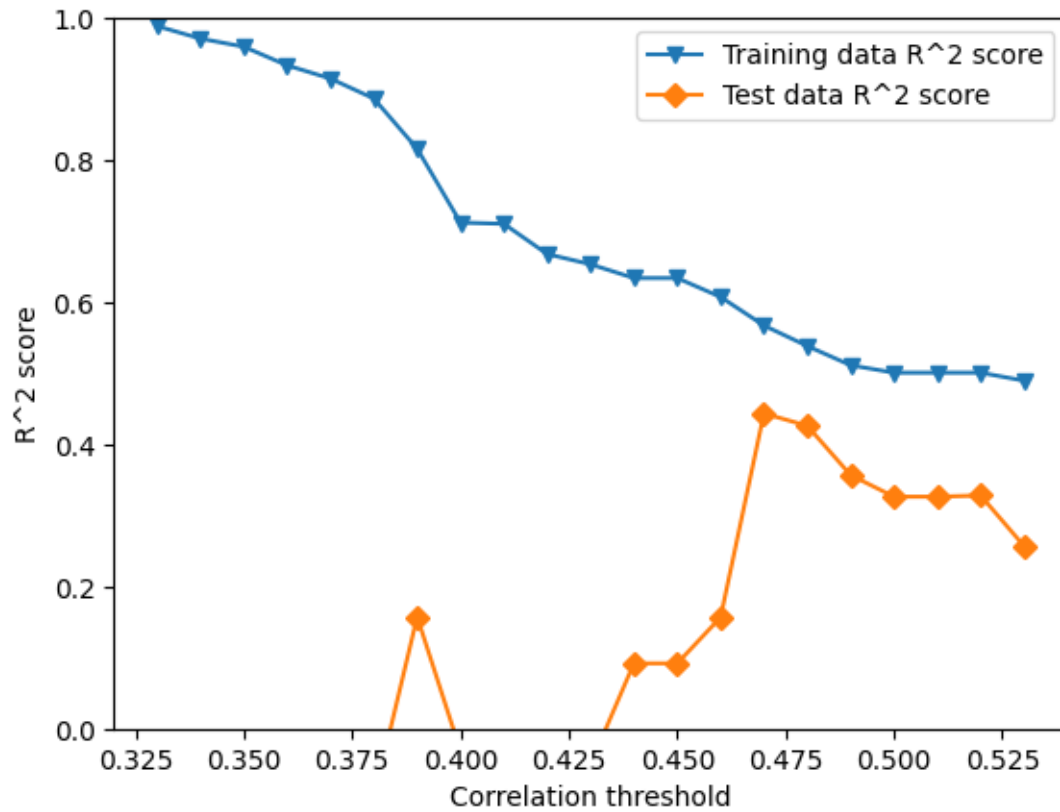

```
[12]: plt.plot(df_without_standardization['Correlation threshold'],
             df_without_standardization['Number of features'], label = "Number of
             features", marker='.')
plt.legend()
plt.xlabel('Correlation threshold')
plt.ylabel('Number of features')
plt.show()
```



[ ]:

## 2.3 Decision Tree

```
[13]: without_standardization, train_r2_, test_r2_, hist1, hist2, target_column_name,
      ↪ training_data_RMSE, test_data_RMSE = pred_model.
      ↪ prepare_data_and_create_model(molecular_descriptors_df=data,
      ↪
      ↪         correlation_threshold=0.50,
      ↪
      ↪         standardization=False,
      ↪
      ↪         model_type='DecisionTreeRegressor',
      ↪
      ↪         max_depth=5,
      ↪
      ↪         target_column_name = target,
      ↪
      ↪         random_state=random_state,
```

```

↪          train_test_split_=True,
↪          verbose=True)

```

I am not doing standardization...

|   | molecular descriptor name |  |  |
|---|---------------------------|--|--|
| 0 | AATS0Z                    |  |  |
| 1 | AATS0are                  |  |  |
| 2 | AATS0d                    |  |  |
| 3 | AATS0dv                   |  |  |
| 4 | AATS0i                    |  |  |

  

|   | molecular descriptor name | corr_value |  |
|---|---------------------------|------------|--|
| 0 | AATS0Z                    | -0.022797  |  |
| 1 | AATS0are                  | -0.139064  |  |
| 2 | AATS0d                    | 0.027592   |  |
| 3 | AATS0dv                   | -0.136049  |  |
| 4 | AATS0i                    | 0.168958   |  |

  

|   | molecular descriptor name | corr_value | absolute correlation value |
|---|---------------------------|------------|----------------------------|
| 0 | AATS0Z                    | -0.022797  | 0.022797                   |
| 1 | AATS0are                  | -0.139064  | 0.139064                   |
| 2 | AATS0d                    | 0.027592   | 0.027592                   |
| 3 | AATS0dv                   | -0.136049  | 0.136049                   |
| 4 | AATS0i                    | 0.168958   | 0.168958                   |

  

|      | molecular descriptor name | corr_value | absolute correlation value |
|------|---------------------------|------------|----------------------------|
| 226  | AMID_0                    | -0.557717  | 0.557717                   |
| 505  | EState_VSA5               | -0.534748  | 0.534748                   |
| 791  | MDEO-12                   | -0.555724  | 0.555724                   |
| 921  | SaasC                     | 0.513071   | 0.513071                   |
| 1091 | VSA_EState5               | 0.526082   | 0.526082                   |

  

|      | molecular descriptor name | corr_value | absolute correlation value |
|------|---------------------------|------------|----------------------------|
| 226  | AMID_0                    | -0.557717  | 0.557717                   |
| 505  | EState_VSA5               | -0.534748  | 0.534748                   |
| 791  | MDEO-12                   | -0.555724  | 0.555724                   |
| 921  | SaasC                     | 0.513071   | 0.513071                   |
| 1091 | VSA_EState5               | 0.526082   | 0.526082                   |

The model used is: DecisionTree...

Return the coefficient of determination of the prediction:

0.07551134844737695

R<sup>2</sup> score: 0.821196391427611

Correlation coefficient: 0.9061988696900979

Test data - unseen during training:

R<sup>2</sup> score: 0.07551134844737695

Correlation coefficient: 0.2747932831191056

[7.89470296 6.31695296 8.21966244 5.88605665 7.89470296 8.21966244  
7.89470296 7.54176295 7.89470296 7.89470296 7.89470296 7.89470296  
7.89470296 7.89470296 8.21966244 8.21966244 7.03791206 5.99684117]

113 7.823909

```
35      6.053057
101     6.721246
36      6.221126
100     7.130768
13      7.966576
0       7.966576
114     7.920819
104     8.309804
96      7.102373
40      7.920819
103     8.397940
48      7.853872
39      8.356547
14      8.148742
117     6.031517
21      7.325139
9       6.818728
```

```
Name: A549, dtype: float64
```

```
Training Root Mean Square Error: 0.41302004356980293
```

```
Testing Root Mean Square Error: 0.7471677242019531
```

```
[14]: print(target_column_name+str('_transformed'))
      print(hist1[target_column_name].hist())
```

```
A549_transformed
```

```
AxesSubplot(0.125,0.11;0.775x0.77)
```



```
[15]: with_standardization, train_r2_, test_r2_, hist1, hist2, target_column_name,
      ↪ training_data_RMSE, test_data_RMSE = pred_model.
      ↪ prepare_data_and_create_model(molecular_descriptors_df=data,
      ↪
      ↪         correlation_threshold=0.50,
      ↪
      ↪         standardization=True,
      ↪
      ↪         model_type='DecisionTreeRegressor',
      ↪
      ↪         max_depth=5,
      ↪
      ↪         target_column_name = target,
      ↪
      ↪         random_state=random_state,
      ↪
      ↪         train_test_split_=True,
      ↪
      ↪         verbose=True)
```

I am doing standardization...  
molecular descriptor name

|      |                           |            |                            |
|------|---------------------------|------------|----------------------------|
| 0    | AATSOZ                    |            |                            |
| 1    | AATSOare                  |            |                            |
| 2    | AATSOd                    |            |                            |
| 3    | AATSOdv                   |            |                            |
| 4    | AATSOi                    |            |                            |
|      | molecular descriptor name | corr_value |                            |
| 0    | AATSOZ                    | -0.022797  |                            |
| 1    | AATSOare                  | -0.139064  |                            |
| 2    | AATSOd                    | 0.027592   |                            |
| 3    | AATSOdv                   | -0.136049  |                            |
| 4    | AATSOi                    | 0.168958   |                            |
|      | molecular descriptor name | corr_value | absolute correlation value |
| 0    | AATSOZ                    | -0.022797  | 0.022797                   |
| 1    | AATSOare                  | -0.139064  | 0.139064                   |
| 2    | AATSOd                    | 0.027592   | 0.027592                   |
| 3    | AATSOdv                   | -0.136049  | 0.136049                   |
| 4    | AATSOi                    | 0.168958   | 0.168958                   |
|      | molecular descriptor name | corr_value | absolute correlation value |
| 226  | AMID_0                    | -0.557717  | 0.557717                   |
| 505  | EState_VSA5               | -0.534748  | 0.534748                   |
| 791  | MDEO-12                   | -0.555724  | 0.555724                   |
| 921  | SaasC                     | 0.513071   | 0.513071                   |
| 1091 | VSA_EState5               | 0.526082   | 0.526082                   |
|      | molecular descriptor name | corr_value | absolute correlation value |
| 226  | AMID_0                    | -0.557717  | 0.557717                   |
| 505  | EState_VSA5               | -0.534748  | 0.534748                   |
| 791  | MDEO-12                   | -0.555724  | 0.555724                   |
| 921  | SaasC                     | 0.513071   | 0.513071                   |
| 1091 | VSA_EState5               | 0.526082   | 0.526082                   |

The model used is: DecisionTree...

Return the coefficient of determination of the prediction:  
0.07551134844737695

R<sup>2</sup> score: 0.821196391427611

Correlation coefficient: 0.9061988696900979

Test data - unseen during training:  
R<sup>2</sup> score: 0.07551134844737695

Correlation coefficient: 0.2747932831191056

[7.89470296 6.31695296 8.21966244 5.88605665 7.89470296 8.21966244  
7.89470296 7.54176295 7.89470296 7.89470296 7.89470296 7.89470296  
7.89470296 7.89470296 8.21966244 8.21966244 7.03791206 5.99684117]

|     |          |
|-----|----------|
| 113 | 7.823909 |
| 35  | 6.053057 |
| 101 | 6.721246 |
| 36  | 6.221126 |
| 100 | 7.130768 |
| 13  | 7.966576 |
| 0   | 7.966576 |
| 114 | 7.920819 |



```

104    8.309804
96    7.102373
40    7.920819
103    8.397940
48    7.853872
39    8.356547
14    8.148742
117    6.031517
21    7.325139
9     6.818728

```

Name: A549, dtype: float64

Training Root Mean Square Error: 0.41302004356980293

Testing Root Mean Square Error: 0.7471677242019531

## 2.4 Search inside correlation space

```

[16]: step = 0.01
initial_step = corr_low
last_step = corr_high
first_list = [x / 100.0 for x in range(int(initial_step*100),
    ↳int(last_step*100), int(step*100))]
max_depth = [range(2, 30, 1)]
corr_th = []
second_list = []
third_list = []
fourth_l = []
fifth_l = []
f_list = []
fif_list = []
for i in first_list:
    for depth in max_depth[0]:

        without_standardization, train_r2, test_r2, _, h_, target_column_name,
    ↳training_data_RMSE, test_data_RMSE = pred_model.
    ↳prepare_data_and_create_model(molecular_descriptors_df=data,

    ↳                                correlation_threshold=i,
    ↳                                standardization=False,
    ↳                                model_type='DecisionTreeRegressor',
    ↳                                max_depth=depth,
    ↳                                target_column_name = target,
    ↳                                random_state=random_state,

```

```

↪          train_test_split_=True,
↪          verbose=False)
    corr_th.append(i)
    second_list.append(train_r2)
    third_list.append(test_r2)
    fourth_l.append(training_data_RMSE)
    fifth_l.append(test_data_RMSE)
    f_list.append(len(h_))
    fif_list.append(depth)

```

```

[17]: df_without_standardization = pd.DataFrame(data=corr_th, columns=["Correlation_
↪threshold"])
df_without_standardization['Training data R^2 score'] = second_list
df_without_standardization['Test data R^2 score'] = third_list
df_without_standardization['Training RMSE'] = fourth_l
df_without_standardization['Test RMSE'] = fifth_l
df_without_standardization['Number of features'] = f_list
df_without_standardization['Depth number'] = fif_list

```

```

[18]: df_decision_tree = df_without_standardization.copy()
#df_without_standardization.to_excel('../Data/
↪A549_Decision_tree_rs_'+str(random_state)+'.xlsx')

```

## 2.5 Plots

```
[19]: corre_list = [x / 100.0 for x in range(int(initial_step*100),
    ↪int(last_step*100), int(0.01*100))]
for element in corre_list:
    element_ =
    ↪df_without_standardization[df_without_standardization['Correlation_
    ↪threshold'] == float(element)]
    plt.plot(element_['Depth number'], element_['Training data R^2 score'],
    ↪label = "Training data R^2 score", marker='v')
    plt.plot(element_['Depth number'], element_['Test data R^2 score'], label =
    ↪"Test data R^2 score", marker='D')
    plt.legend()
    plt.xlabel('Depth number -> correlation threshold: '+str(element)+'.\n
    ↪Number of features: '+str(element_['Number of features'].iloc[0]),
    ↪fontweight='bold')
    plt.xlim(max(element_['Depth number'])+1, min(element_['Depth number'])-1)
    plt.ylabel('R^2 score')
    plt.ylim([0, 1])
    plt.rc('grid', linestyle="-.", color='black')
    plt.grid(True)
    plt.show()
```

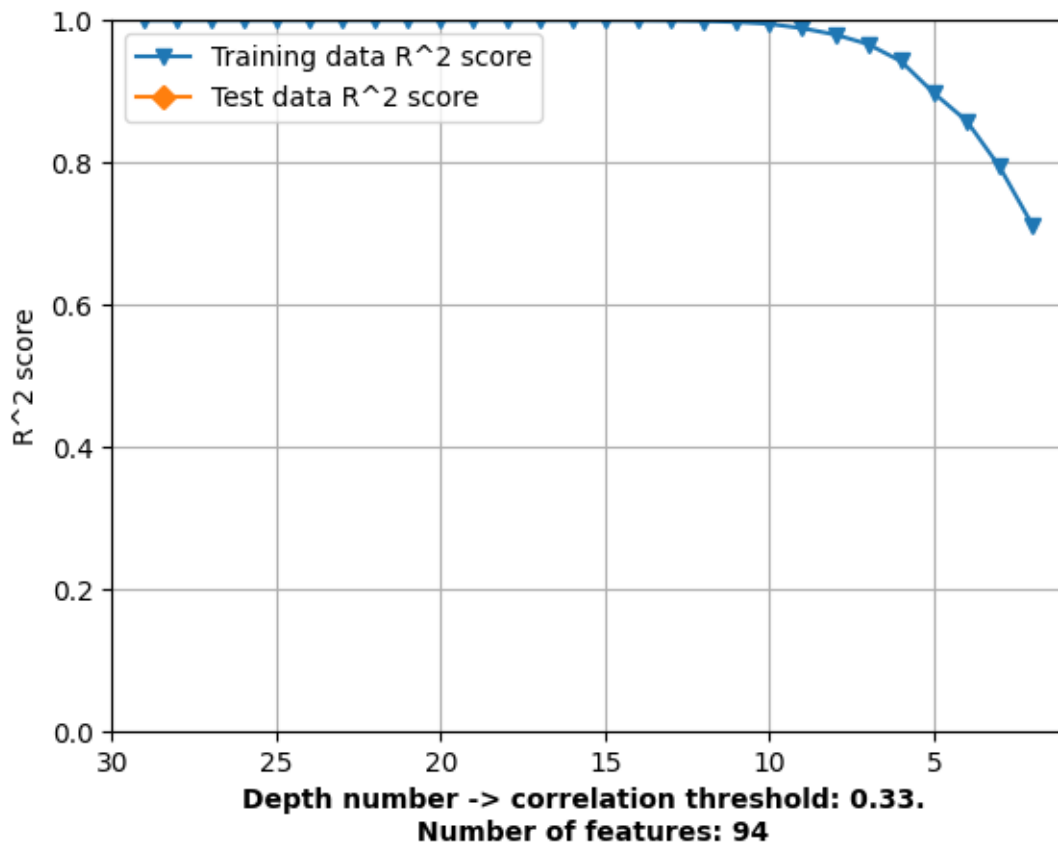

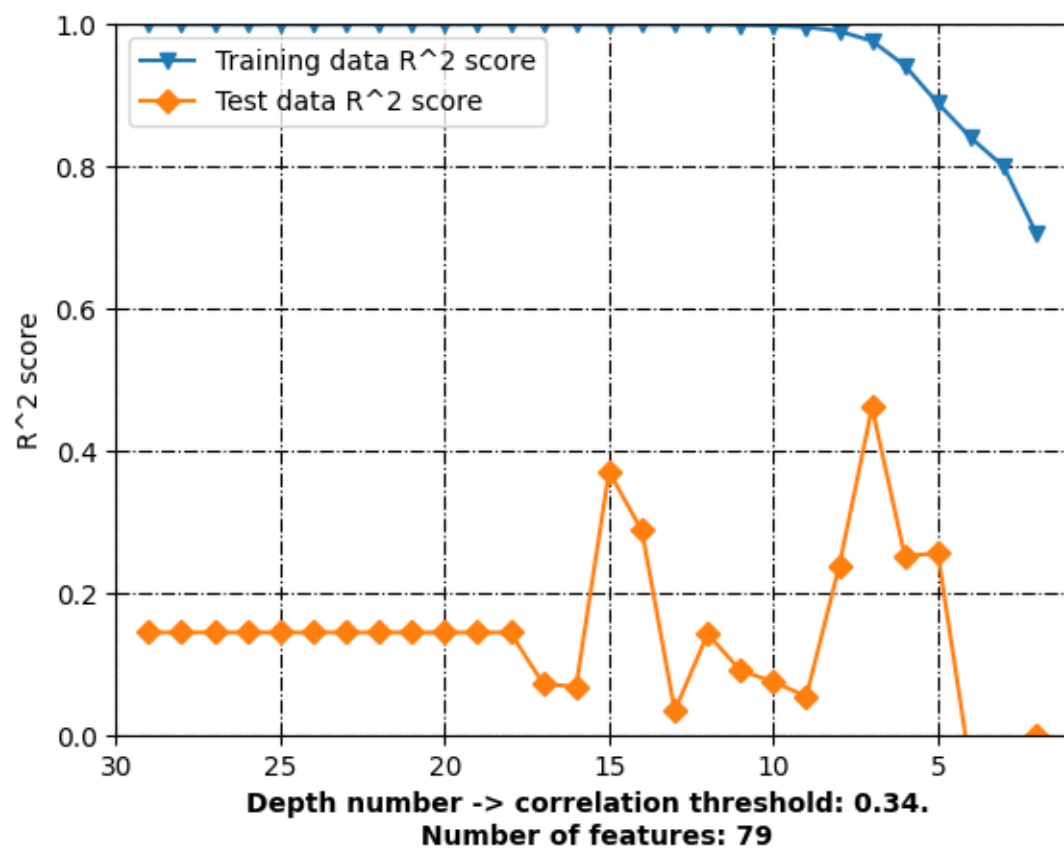

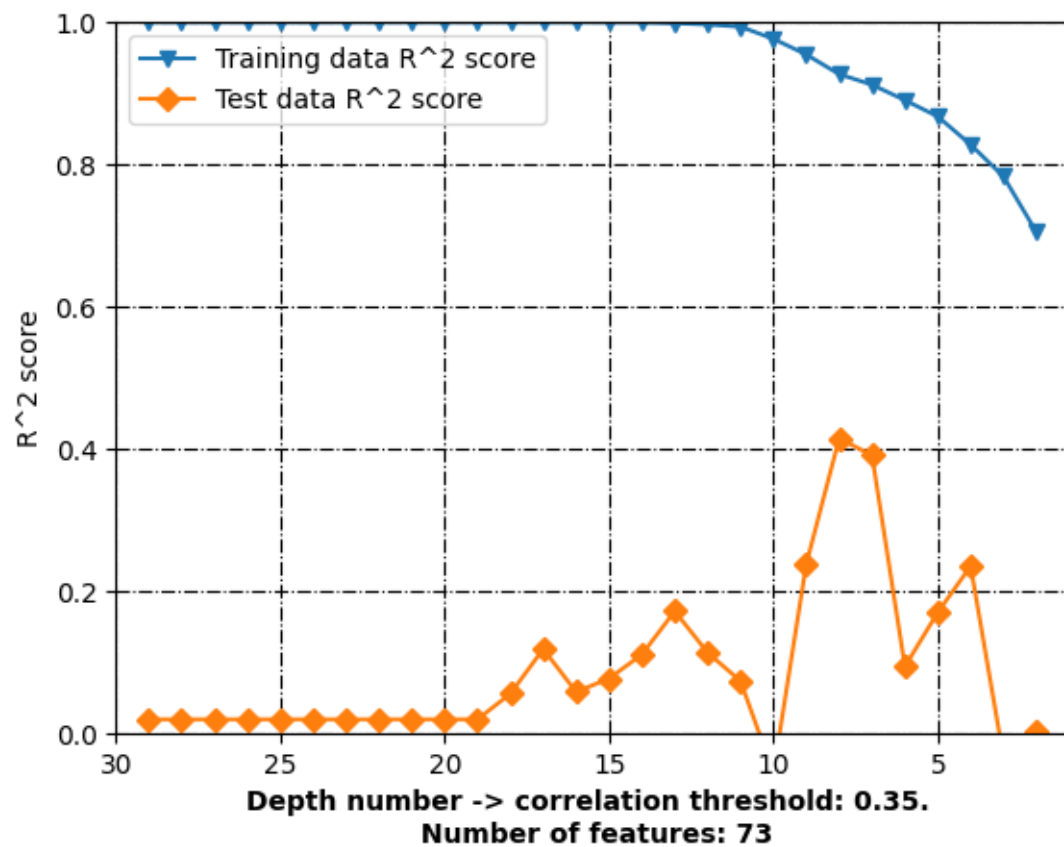

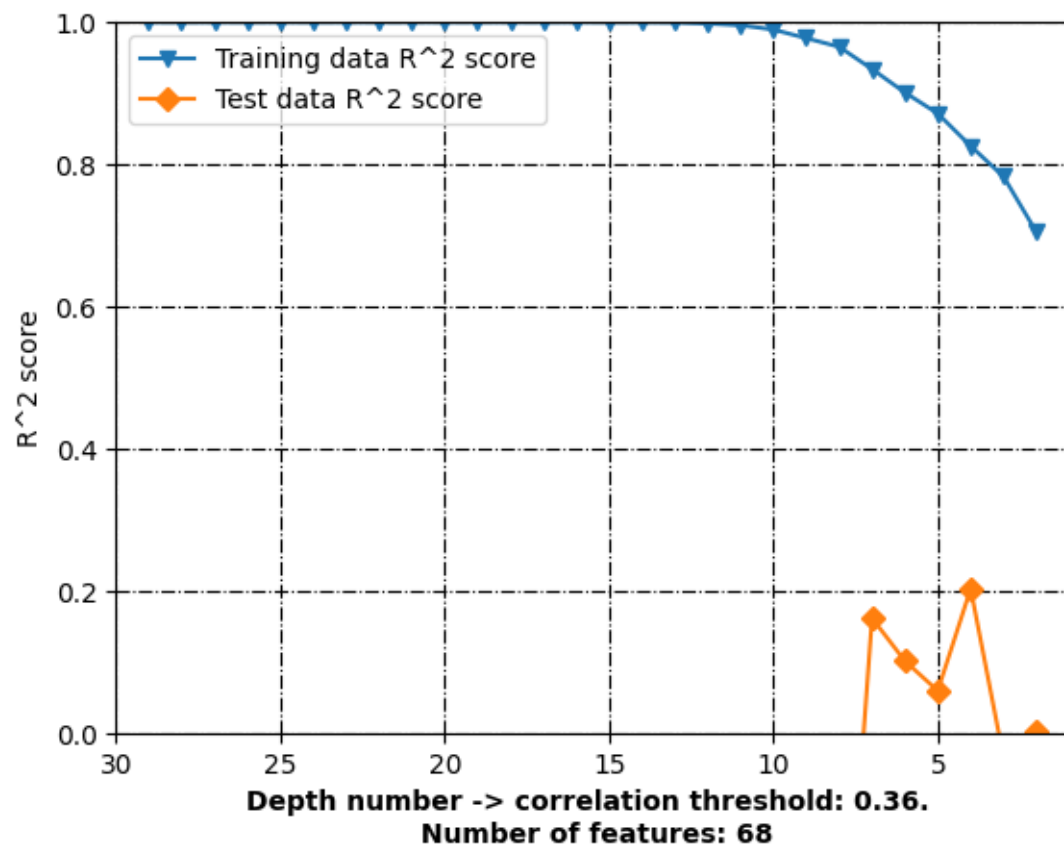

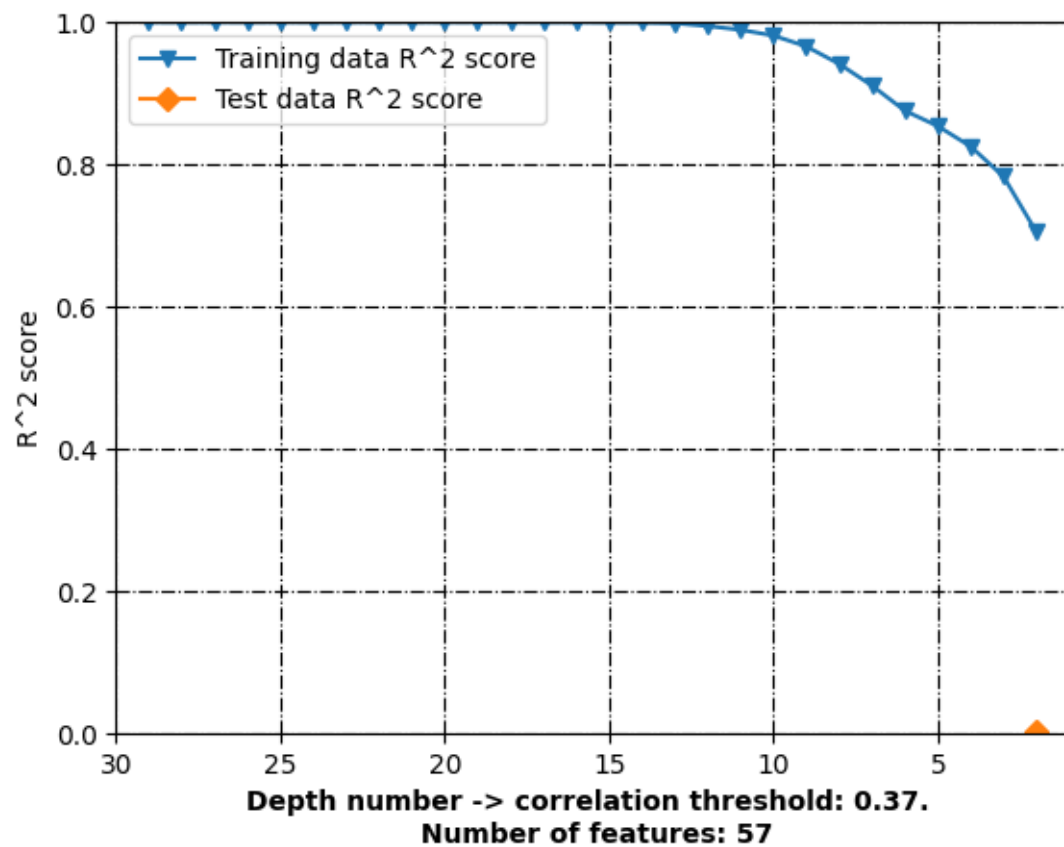

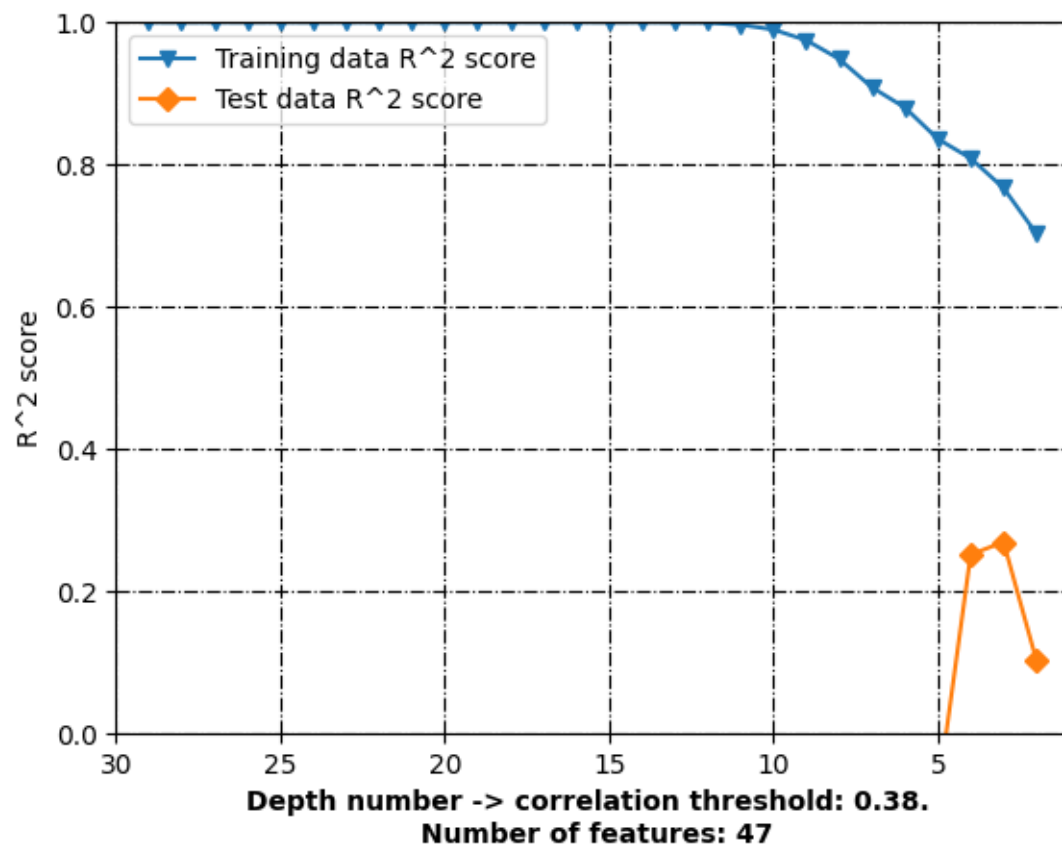



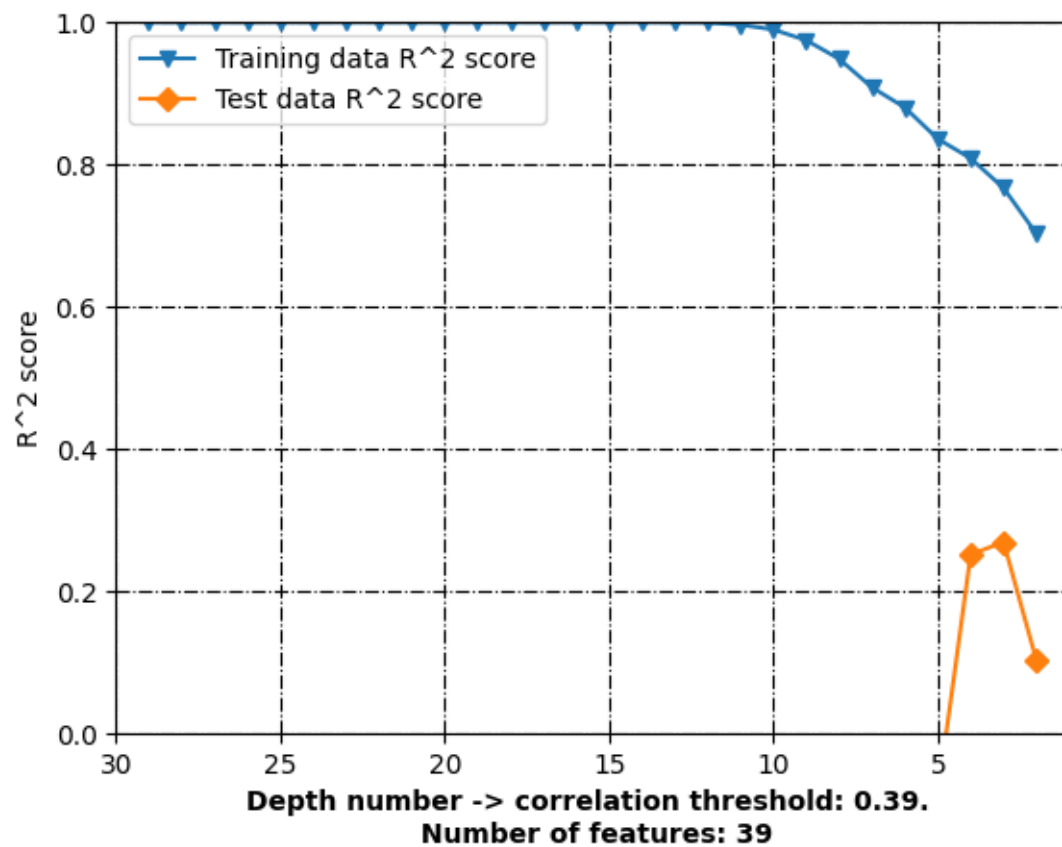

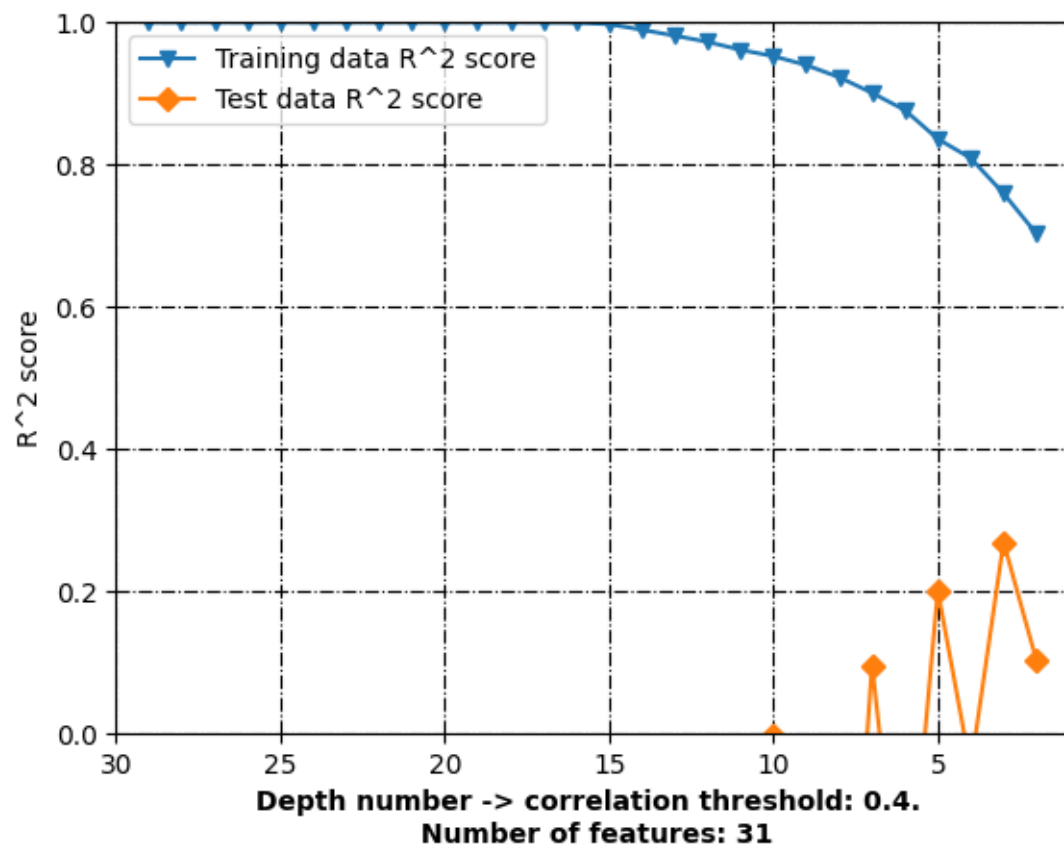

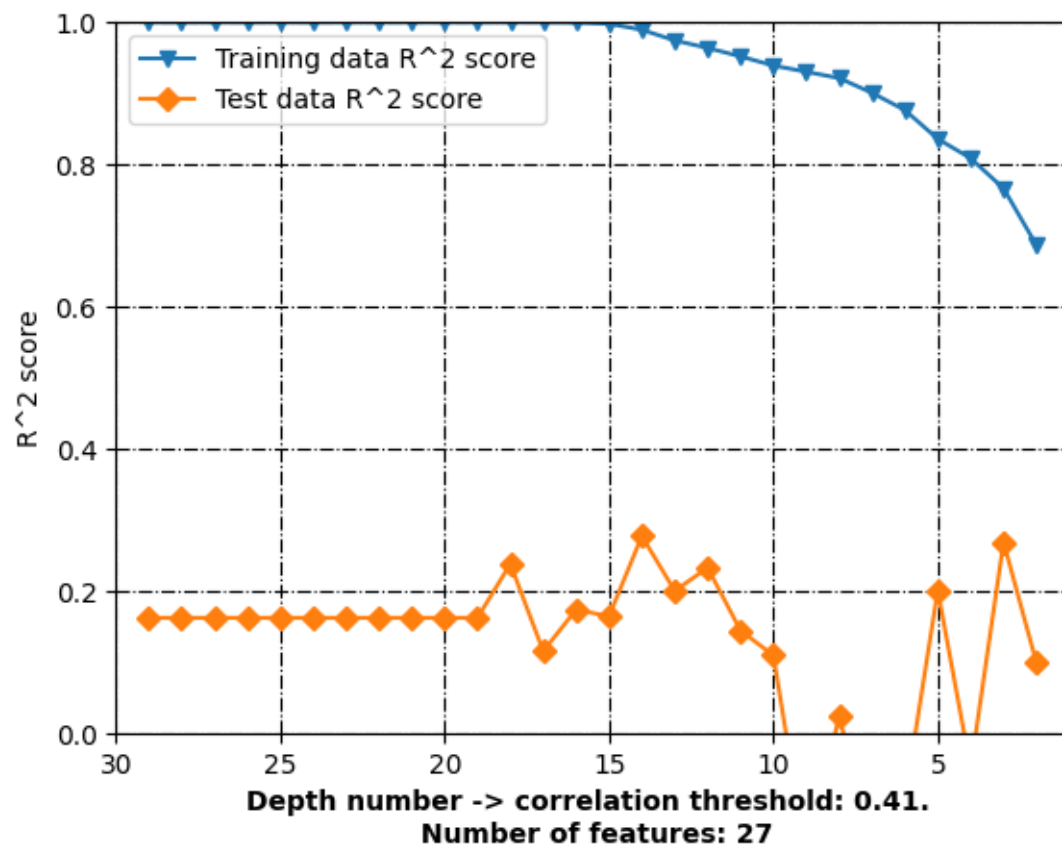

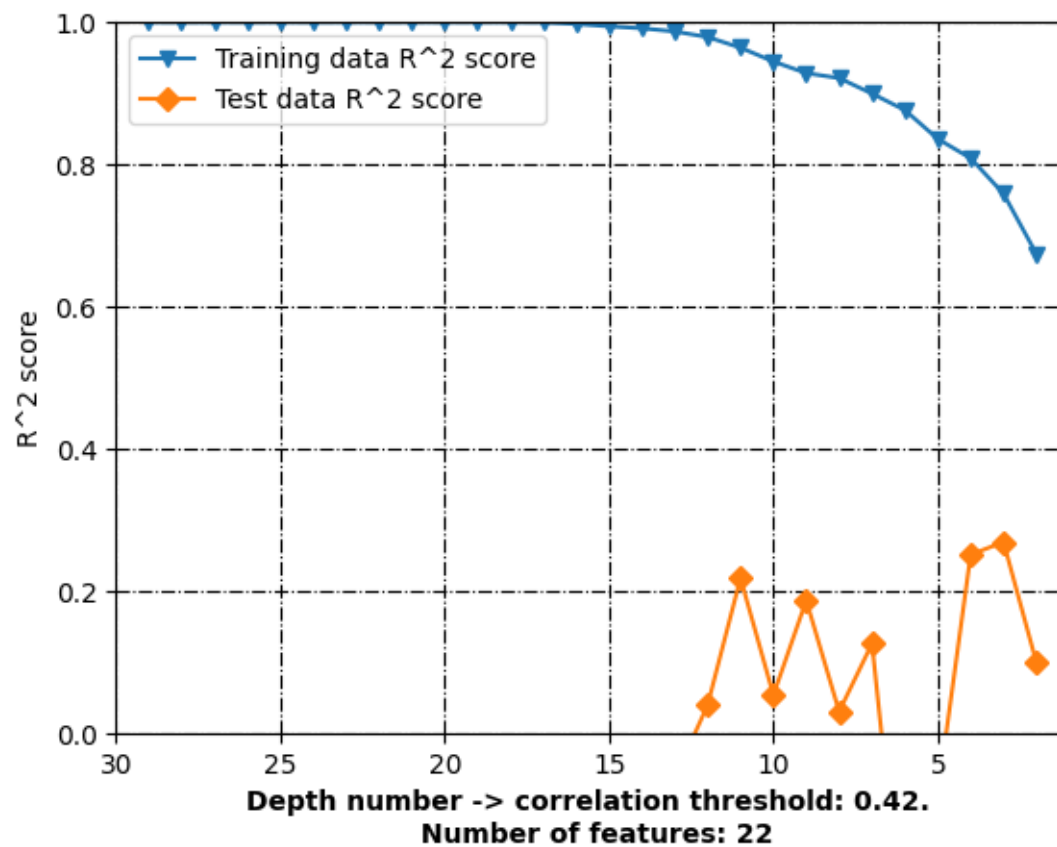

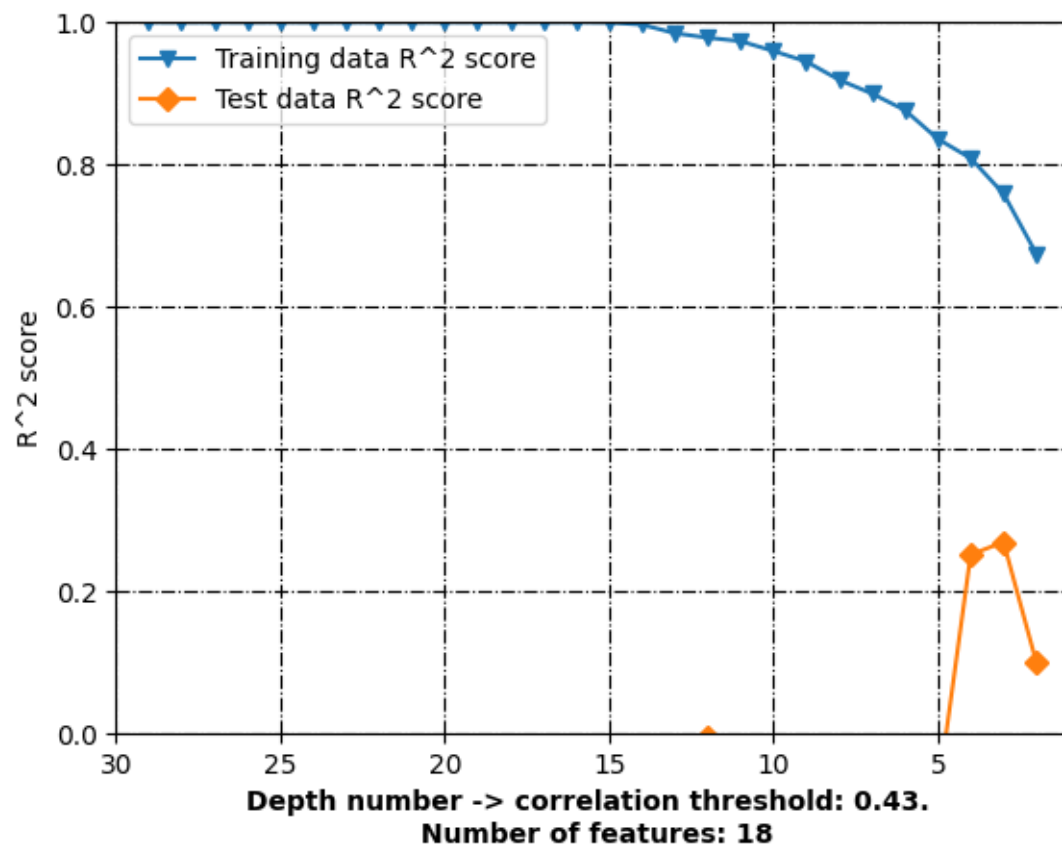

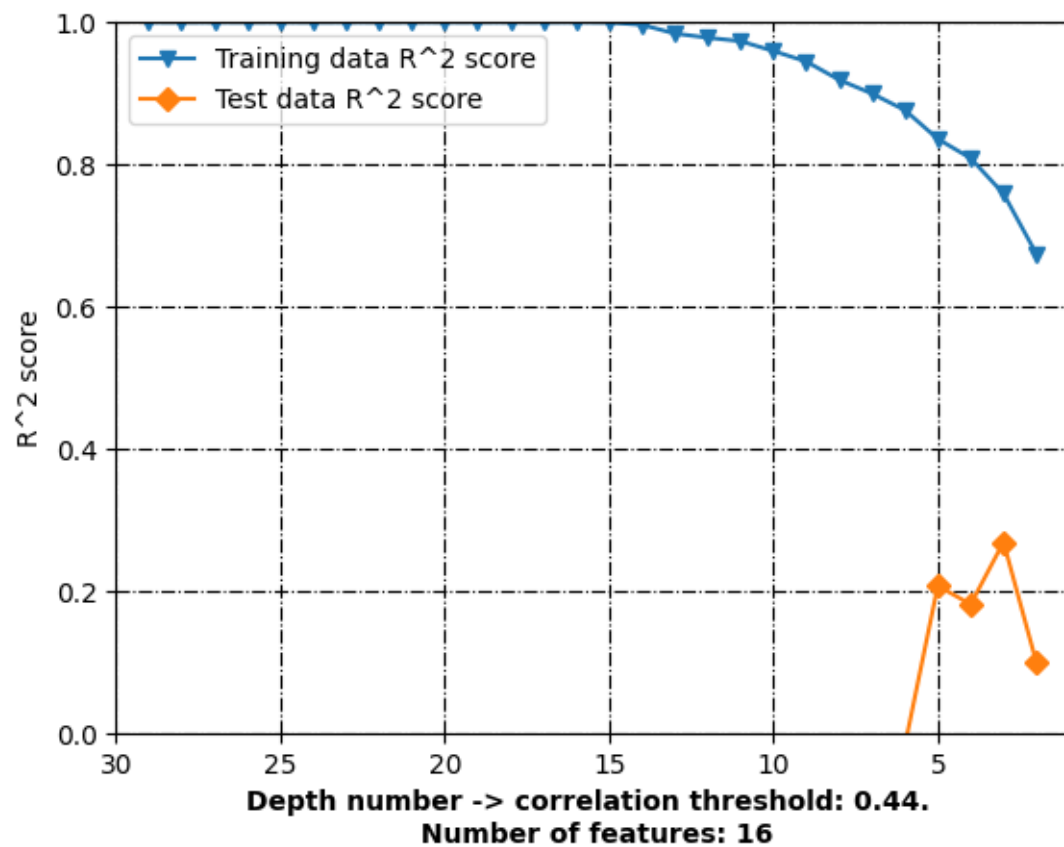

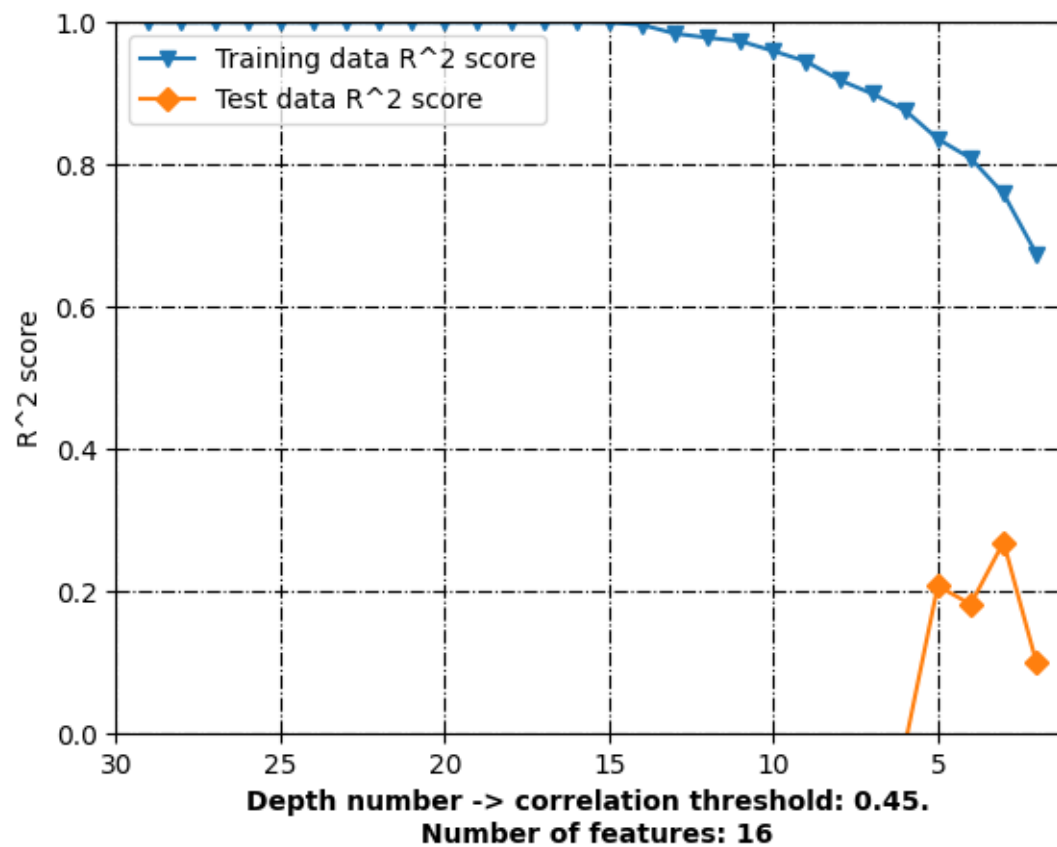

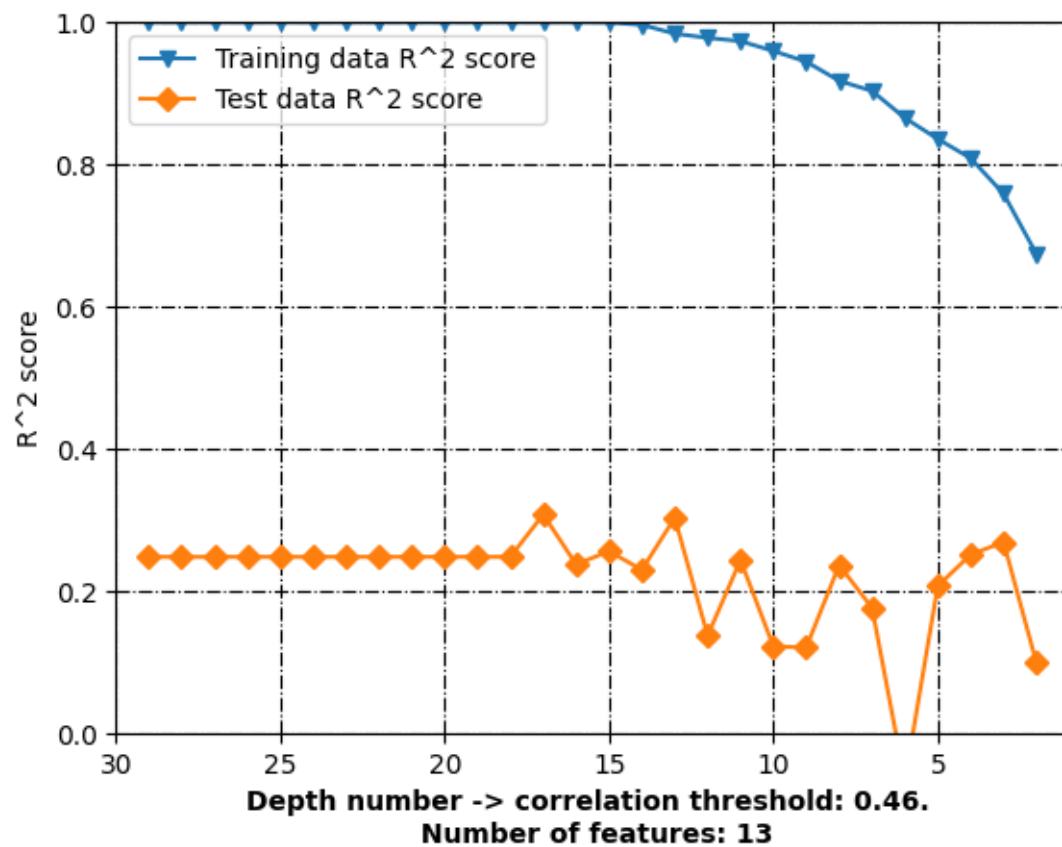



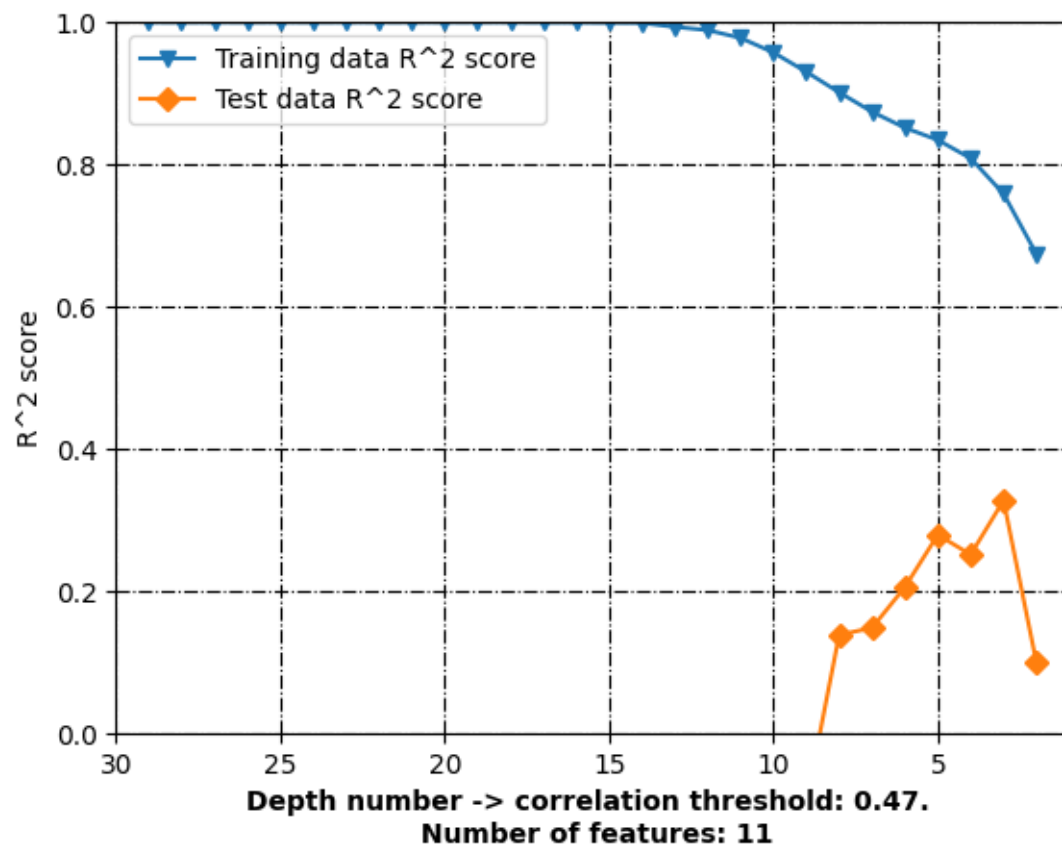

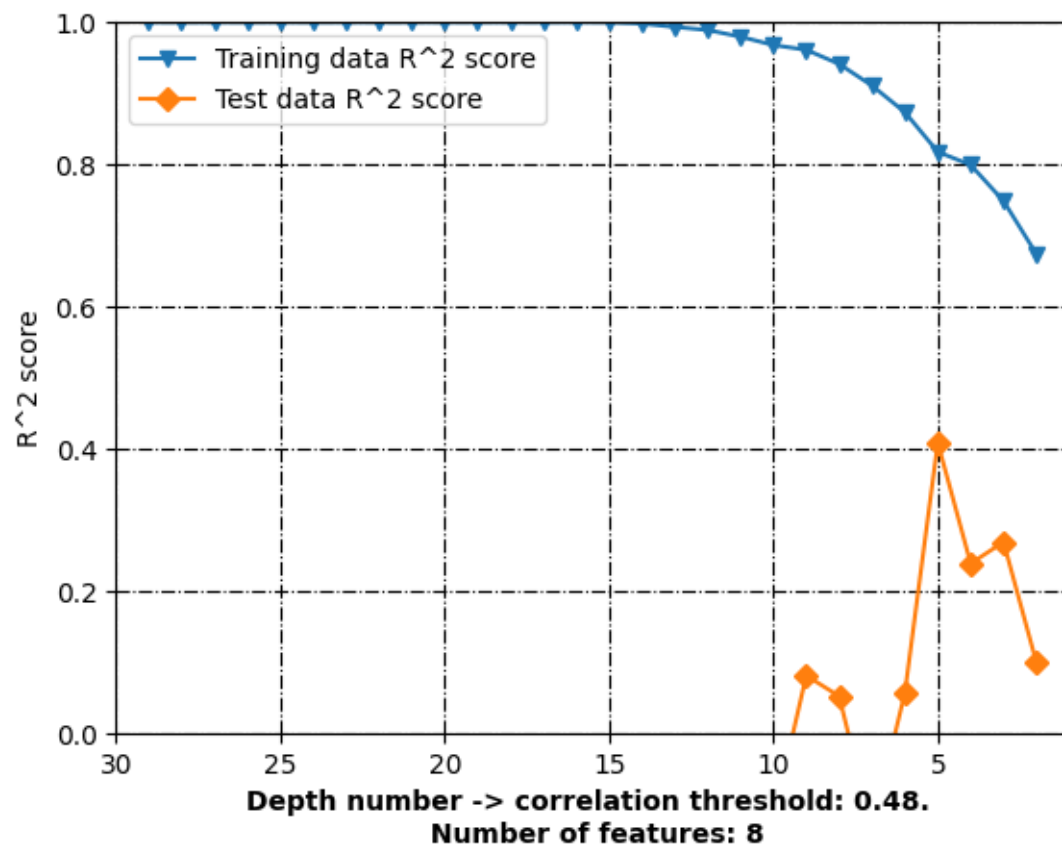

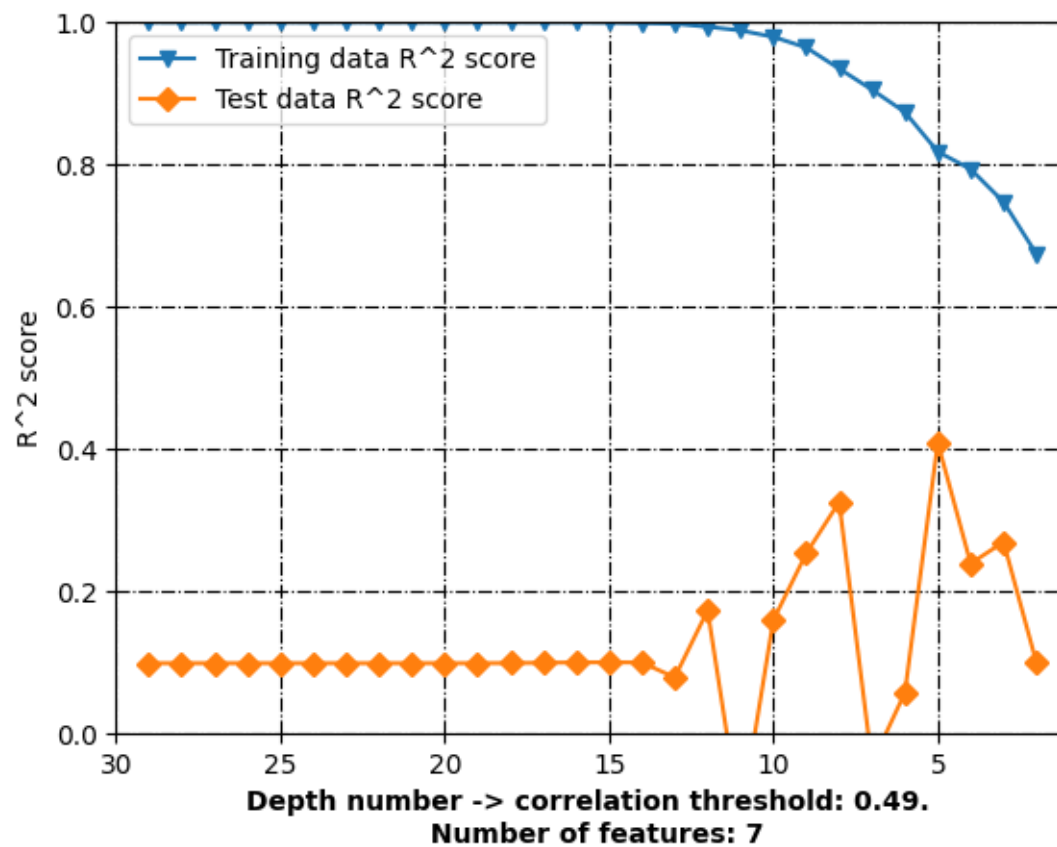

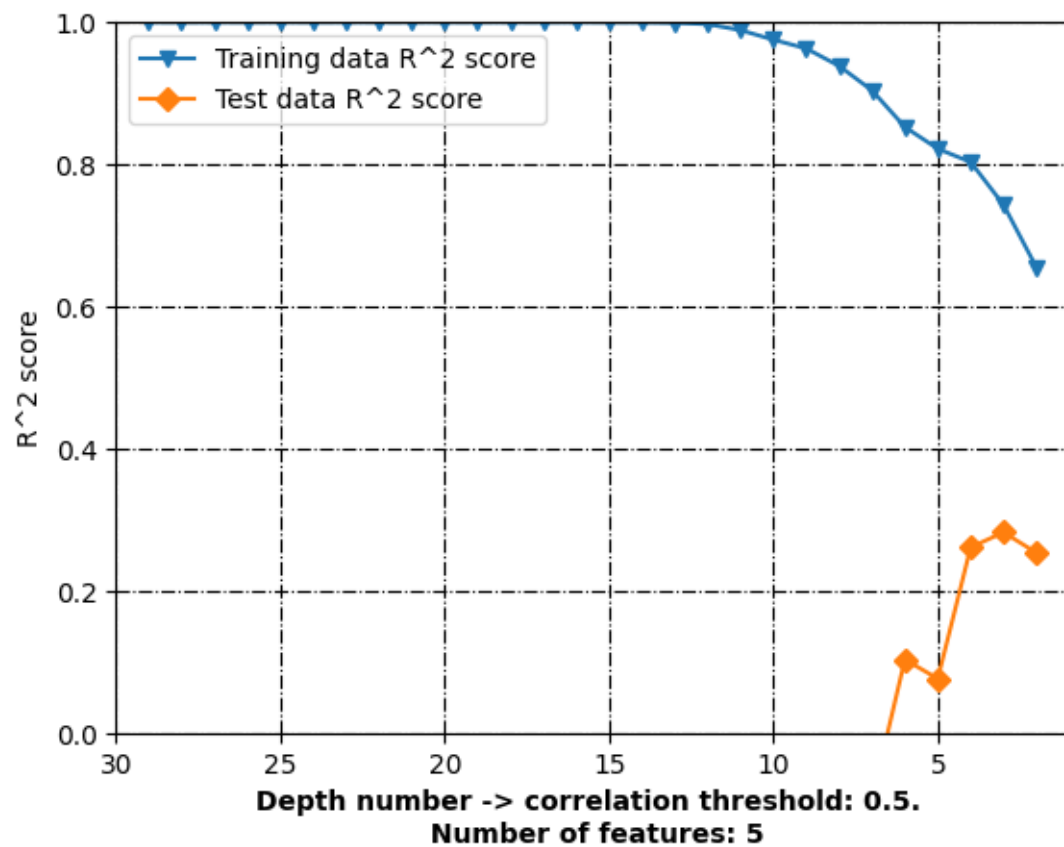

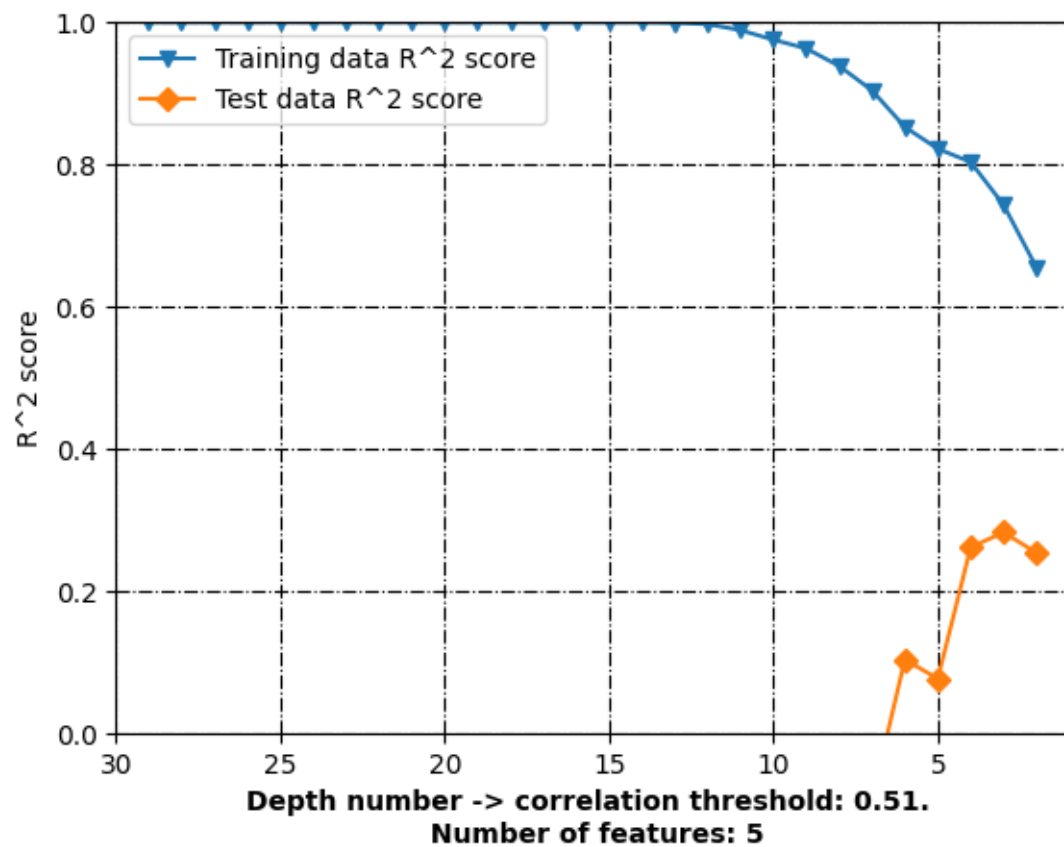

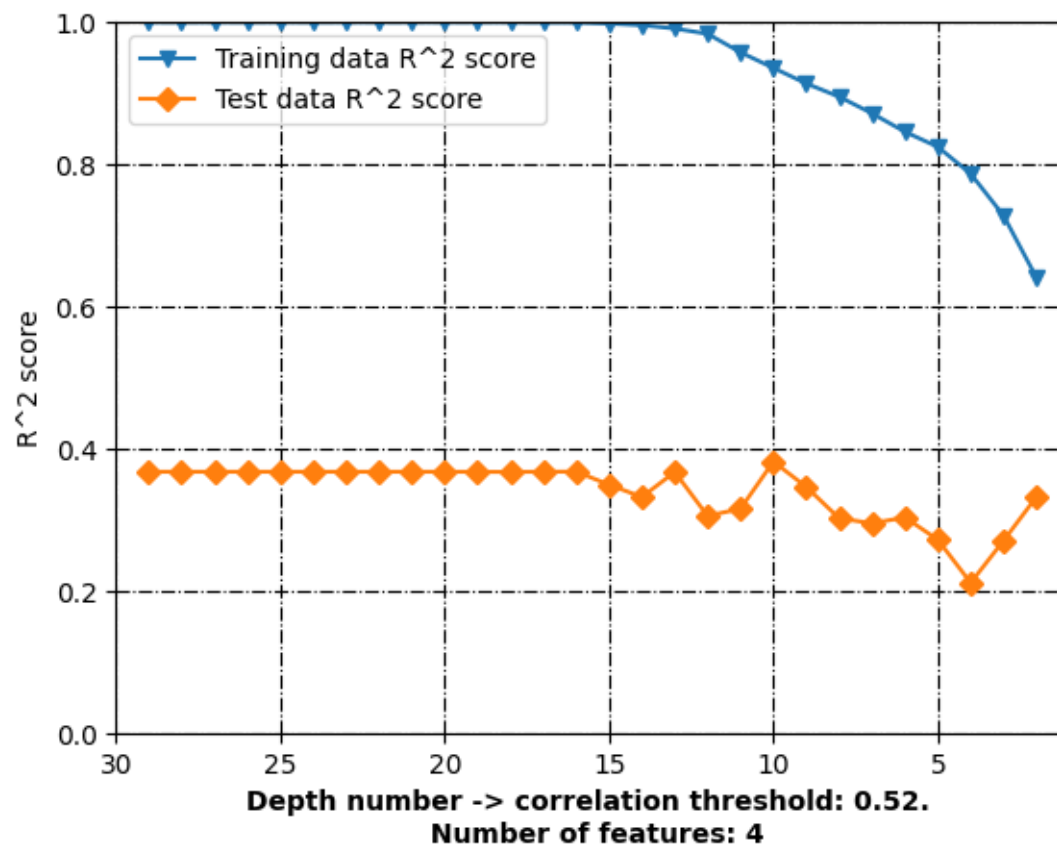

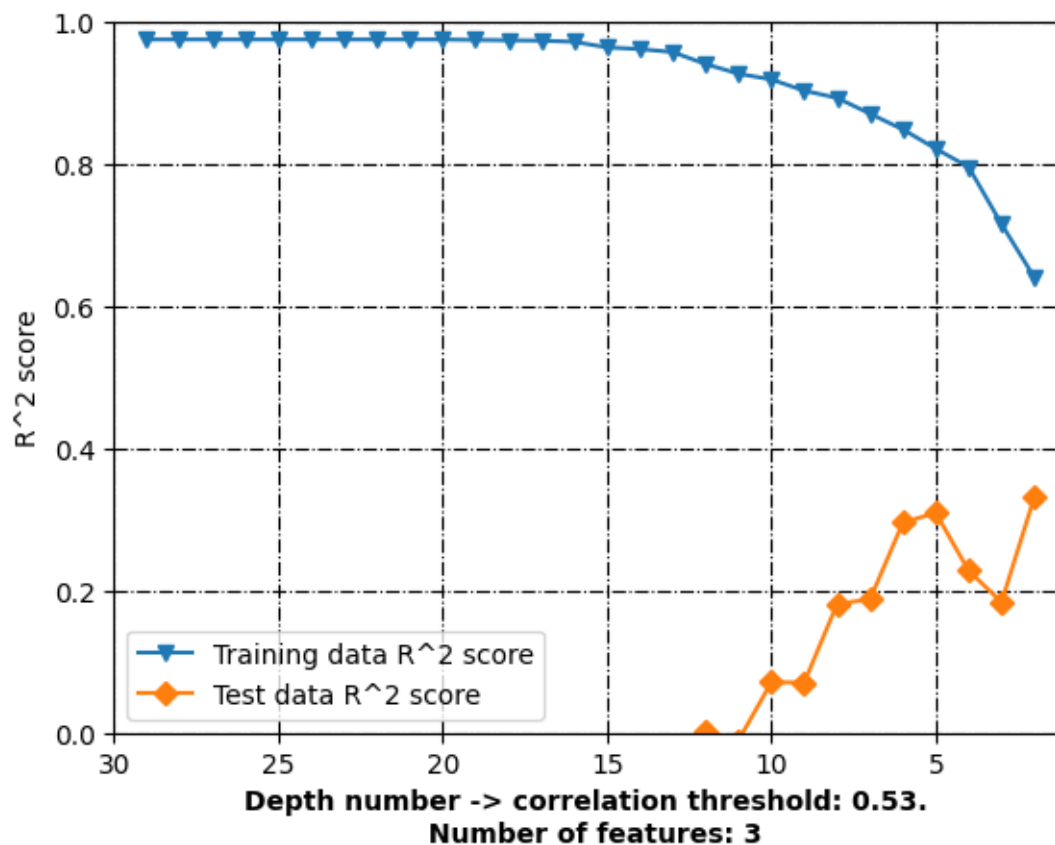

```
[20]: plt.plot(df_without_standardization['Correlation threshold'],  
             df_without_standardization['Number of features'], label = "Number of  
             features", marker='.')  
plt.legend()  
plt.xlabel('Correlation threshold')  
plt.ylabel('Number of features')  
plt.show()
```

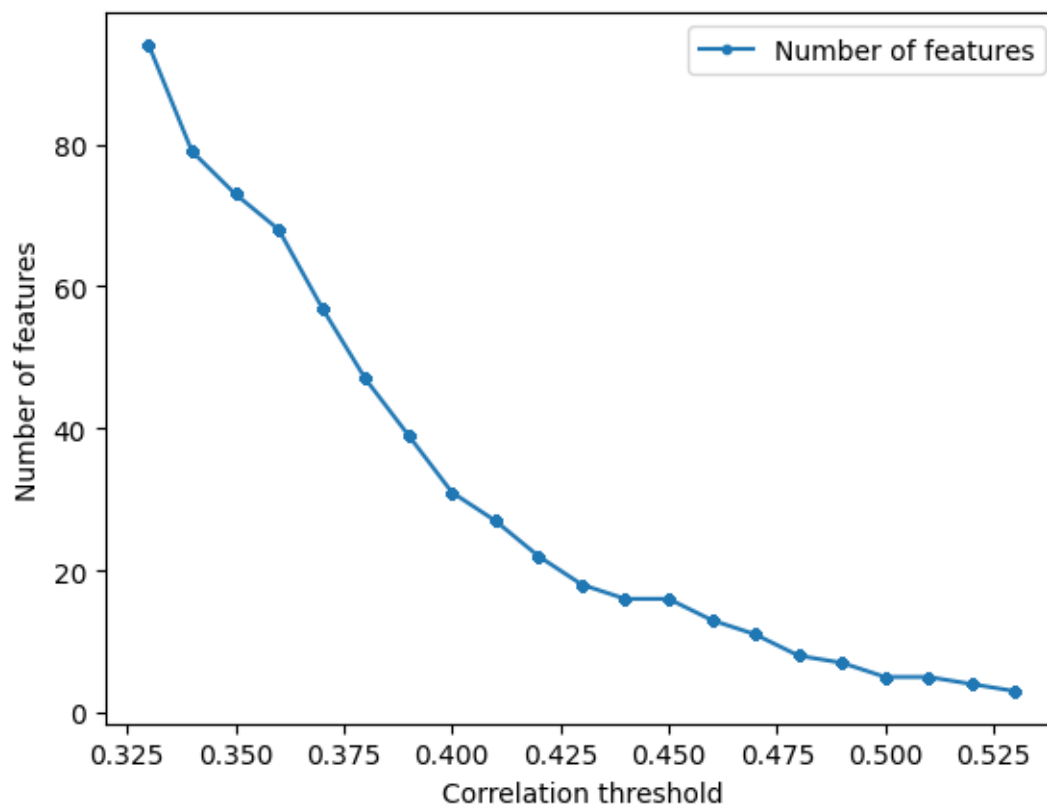

[ ]:

### 3 Random Forest

```
[21]: without_standardization, train_r2_, test_r2_, hist1, hist2, target_column_name,
      ↪ training_data_RMSE, test_data_RMSE = pred_model.
      ↪ prepare_data_and_create_model(molecular_descriptors_df=data,
      ↪
      ↪         correlation_threshold=0.50,
      ↪         standardization=False,
      ↪         model_type='RandomForestRegressor',
      ↪         n_estimators=12,
      ↪         target_column_name = target,
      ↪         random_state=random_state,
```



```

↪          train_test_split_=True,
↪          verbose=True)

```

I am not doing standardization...

|   | molecular descriptor name |  |  |
|---|---------------------------|--|--|
| 0 | AATSOZ                    |  |  |
| 1 | AATSOare                  |  |  |
| 2 | AATSOd                    |  |  |
| 3 | AATSOdv                   |  |  |
| 4 | AATSOi                    |  |  |

  

|   | molecular descriptor name | corr_value |  |
|---|---------------------------|------------|--|
| 0 | AATSOZ                    | -0.022797  |  |
| 1 | AATSOare                  | -0.139064  |  |
| 2 | AATSOd                    | 0.027592   |  |
| 3 | AATSOdv                   | -0.136049  |  |
| 4 | AATSOi                    | 0.168958   |  |

  

|   | molecular descriptor name | corr_value | absolute correlation value |
|---|---------------------------|------------|----------------------------|
| 0 | AATSOZ                    | -0.022797  | 0.022797                   |
| 1 | AATSOare                  | -0.139064  | 0.139064                   |
| 2 | AATSOd                    | 0.027592   | 0.027592                   |
| 3 | AATSOdv                   | -0.136049  | 0.136049                   |
| 4 | AATSOi                    | 0.168958   | 0.168958                   |

  

|      | molecular descriptor name | corr_value | absolute correlation value |
|------|---------------------------|------------|----------------------------|
| 226  | AMID_0                    | -0.557717  | 0.557717                   |
| 505  | EState_VSA5               | -0.534748  | 0.534748                   |
| 791  | MDEO-12                   | -0.555724  | 0.555724                   |
| 921  | SaasC                     | 0.513071   | 0.513071                   |
| 1091 | VSA_EState5               | 0.526082   | 0.526082                   |

  

|      | molecular descriptor name | corr_value | absolute correlation value |
|------|---------------------------|------------|----------------------------|
| 226  | AMID_0                    | -0.557717  | 0.557717                   |
| 505  | EState_VSA5               | -0.534748  | 0.534748                   |
| 791  | MDEO-12                   | -0.555724  | 0.555724                   |
| 921  | SaasC                     | 0.513071   | 0.513071                   |
| 1091 | VSA_EState5               | 0.526082   | 0.526082                   |

The model used is: RandomForest...

Return the coefficient of determination of the prediction:

0.6518304025888859

R<sup>2</sup> score: 0.9434388899856951

Correlation coefficient: 0.9713078245261361

Test data - unseen during training:

R<sup>2</sup> score: 0.6518304025888859

Correlation coefficient: 0.8073601442905675

```

[7.9447878  5.83806583 7.48789076 6.61477061 7.42258424 8.23414219
 7.97322552 7.61315235 7.67534542 7.58053821 8.29502431 7.78406913
 7.83000603 7.24628922 8.23414219 6.60649711 7.22394916 6.8191525 ]
113      7.823909

```

```
35      6.053057
101     6.721246
36      6.221126
100     7.130768
13      7.966576
0       7.966576
114     7.920819
104     8.309804
96      7.102373
40      7.920819
103     8.397940
48      7.853872
39      8.356547
14      8.148742
117     6.031517
21      7.325139
9       6.818728
```

```
Name: A549, dtype: float64
```

```
Training Root Mean Square Error: 0.23229611707100617
```

```
Testing Root Mean Square Error: 0.45852469814920027
```

```
[22]: print(target_column_name+str('_transformed'))
      print(hist1[target_column_name].hist())
```

```
A549_transformed
```

```
AxesSubplot(0.125,0.11;0.775x0.77)
```

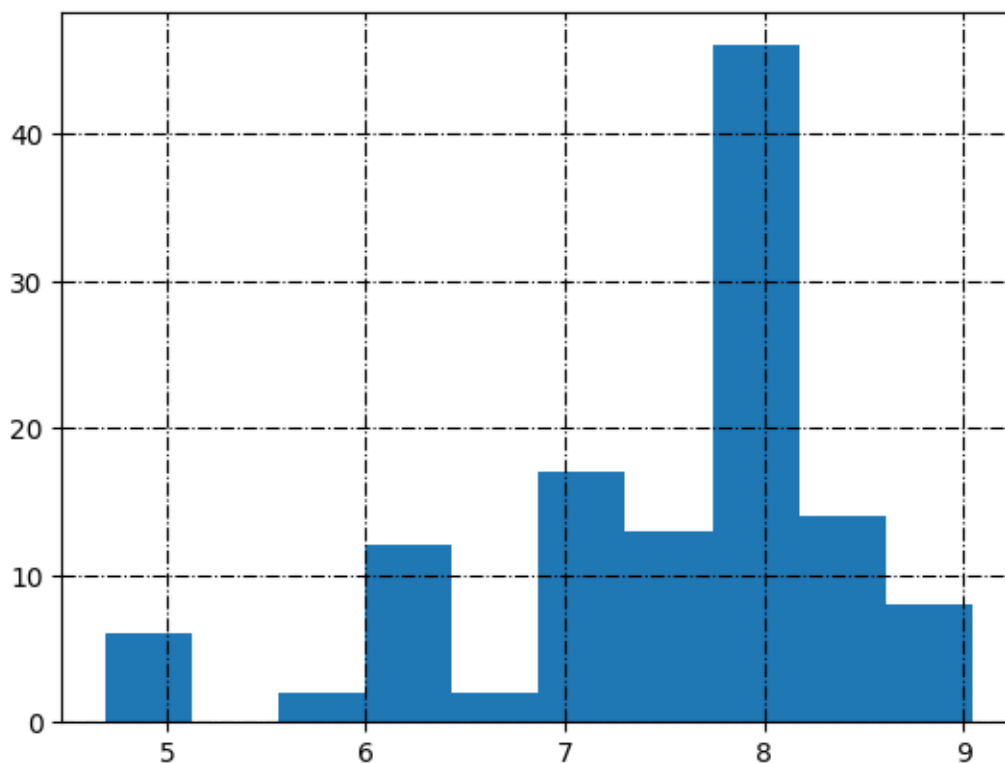

```
[23]: with_standardization, train_r2_, test_r2_, hist1, hist2, target_column_name,
      ↪ training_data_RMSE, test_data_RMSE = pred_model.
      ↪ prepare_data_and_create_model(molecular_descriptors_df=data,
      ↪
      ↪         correlation_threshold=0.50,
      ↪
      ↪         standardization=True,
      ↪
      ↪         model_type='RandomForestRegressor',
      ↪
      ↪         n_estimators=12,
      ↪
      ↪         target_column_name = target,
      ↪
      ↪         random_state=random_state,
      ↪
      ↪         train_test_split=True,
      ↪
      ↪         verbose=True)
```

I am doing standardization...  
molecular descriptor name

|      |                           |            |                            |
|------|---------------------------|------------|----------------------------|
| 0    | AATSOZ                    |            |                            |
| 1    | AATSOare                  |            |                            |
| 2    | AATSOd                    |            |                            |
| 3    | AATSOdv                   |            |                            |
| 4    | AATSOi                    |            |                            |
|      | molecular descriptor name | corr_value |                            |
| 0    | AATSOZ                    | -0.022797  |                            |
| 1    | AATSOare                  | -0.139064  |                            |
| 2    | AATSOd                    | 0.027592   |                            |
| 3    | AATSOdv                   | -0.136049  |                            |
| 4    | AATSOi                    | 0.168958   |                            |
|      | molecular descriptor name | corr_value | absolute correlation value |
| 0    | AATSOZ                    | -0.022797  | 0.022797                   |
| 1    | AATSOare                  | -0.139064  | 0.139064                   |
| 2    | AATSOd                    | 0.027592   | 0.027592                   |
| 3    | AATSOdv                   | -0.136049  | 0.136049                   |
| 4    | AATSOi                    | 0.168958   | 0.168958                   |
|      | molecular descriptor name | corr_value | absolute correlation value |
| 226  | AMID_0                    | -0.557717  | 0.557717                   |
| 505  | EState_VSA5               | -0.534748  | 0.534748                   |
| 791  | MDEO-12                   | -0.555724  | 0.555724                   |
| 921  | SaasC                     | 0.513071   | 0.513071                   |
| 1091 | VSA_EState5               | 0.526082   | 0.526082                   |
|      | molecular descriptor name | corr_value | absolute correlation value |
| 226  | AMID_0                    | -0.557717  | 0.557717                   |
| 505  | EState_VSA5               | -0.534748  | 0.534748                   |
| 791  | MDEO-12                   | -0.555724  | 0.555724                   |
| 921  | SaasC                     | 0.513071   | 0.513071                   |
| 1091 | VSA_EState5               | 0.526082   | 0.526082                   |

The model used is: RandomForest...

Return the coefficient of determination of the prediction:  
0.6518304025888859

R<sup>2</sup> score: 0.9434388899856951

Correlation coefficient: 0.9713078245261361

Test data - unseen during training:  
R<sup>2</sup> score: 0.6518304025888859

Correlation coefficient: 0.8073601442905675

[7.9447878 5.83806583 7.48789076 6.61477061 7.42258424 8.23414219  
7.97322552 7.61315235 7.67534542 7.58053821 8.29502431 7.78406913  
7.83000603 7.24628922 8.23414219 6.60649711 7.22394916 6.8191525 ]

|     |          |
|-----|----------|
| 113 | 7.823909 |
| 35  | 6.053057 |
| 101 | 6.721246 |
| 36  | 6.221126 |
| 100 | 7.130768 |
| 13  | 7.966576 |
| 0   | 7.966576 |
| 114 | 7.920819 |

```

104      8.309804
96      7.102373
40      7.920819
103     8.397940
48      7.853872
39      8.356547
14      8.148742
117     6.031517
21      7.325139
9       6.818728

```

Name: A549, dtype: float64

Training Root Mean Square Error: 0.23229611707100617

Testing Root Mean Square Error: 0.45852469814920027

### 3.1 Search inside correlation space

```

[24]: step = 0.01
initial_step = corr_low
last_step = corr_high
first_list = [x / 100.0 for x in range(int(initial_step*100),
    ↪int(last_step*100), int(step*100))]
n_estimators = [range(2,21,1)]
corr_th = []
second_list = []
third_list = []
fourth_l = []
fifth_l = []
f_list = []
fif_list = []
for i in first_list:

    for estimator in n_estimators[0]:

        without_standardization, train_r2, test_r2, _, h_, target_column_name,
    ↪training_data_RMSE, test_data_RMSE = pred_model.
    ↪prepare_data_and_create_model(molecular_descriptors_df=data,

    ↪                                correlation_threshold=i,

    ↪                                standardization=False,

    ↪                                model_type='RandomForestRegressor',

    ↪                                n_estimators_=estimator,

    ↪                                target_column_name = target,

```

```

↪          random_state=random_state,

↪          train_test_split_=True,

↪          verbose=False)
    corr_th.append(i)
    second_list.append(train_r2)
    third_list.append(test_r2)
    fourth_l.append(training_data_RMSE)
    fifth_l.append(test_data_RMSE)
    f_list.append(len(h_))
    fif_list.append(estimator)

```

```

[25]: df_without_standardization = pd.DataFrame(data=corr_th, columns=["Correlation_
↪threshold"])
df_without_standardization['Training data R^2 score'] = second_list
df_without_standardization['Test data R^2 score'] = third_list
df_without_standardization['Training RMSE'] = fourth_l
df_without_standardization['Test RMSE'] = fifth_l
df_without_standardization['Number of features'] = f_list
df_without_standardization['Number of estimators'] = fif_list

```

```

[26]: df_random_forest = df_without_standardization.copy()
#df_without_standardization.to_excel('../Data/
↪A549_Random_forest_rs_'+str(random_state)+'_xlsx')

```

```

[27]: corre_list = [x / 100.0 for x in range(int(initial_step*100),
↪int(last_step*100), int(0.01*100))]
for element in corre_list:
    element_ =
↪df_without_standardization[df_without_standardization['Correlation_
↪threshold'] == float(element)]
    plt.plot(element_['Number of estimators'], element_['Training data R^2_
↪score'], label = "Training data R^2 score", marker='v')
    plt.plot(element_['Number of estimators'], element_['Test data R^2 score'],
↪label = "Test data R^2 score", marker='D')
    plt.legend()
    plt.xlabel('Number of estimators -> correlation threshold: '+str(element)+'.'
↪\n Number of features: '+str(element_['Number of features'].iloc[0]))
    plt.xlim(max(element_['Number of estimators'])+1, min(element_['Number of_
↪estimators'])-1)
    plt.ylabel('R^2 score')
    plt.ylim([0, 1])
    plt.rc('grid', linestyle="-. ", color='black')
    plt.grid(True)

```

```
plt.show()
```

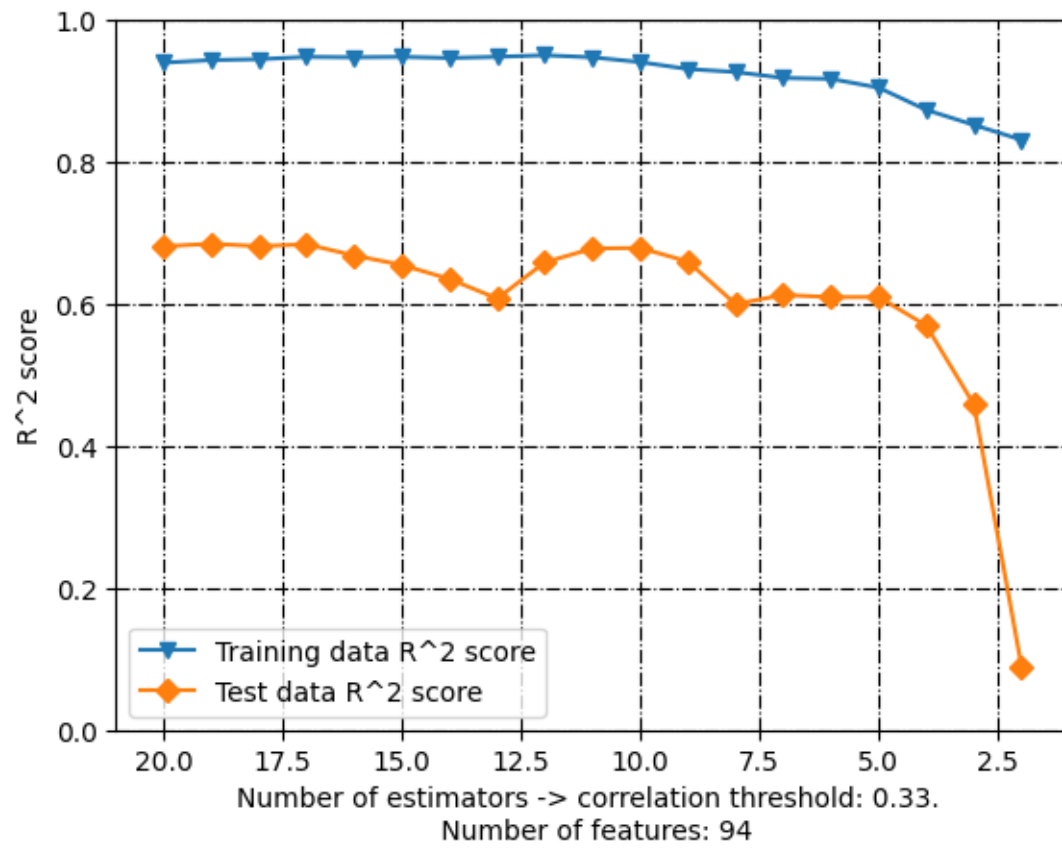

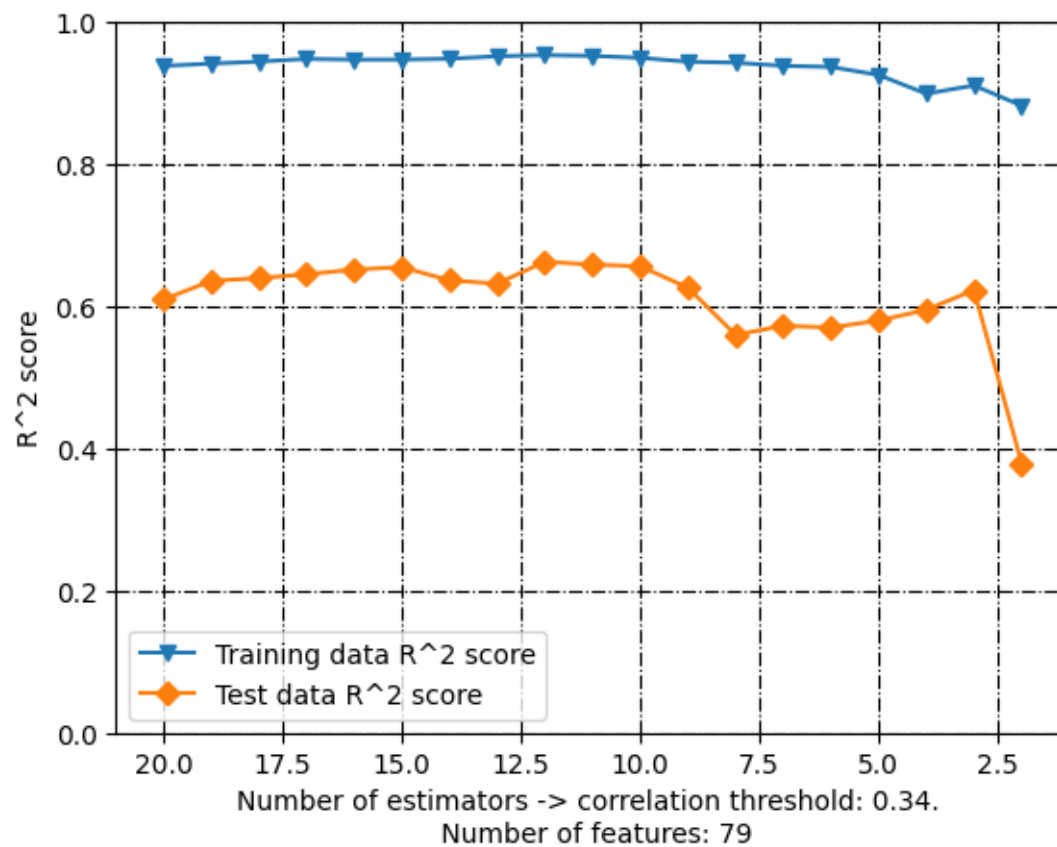



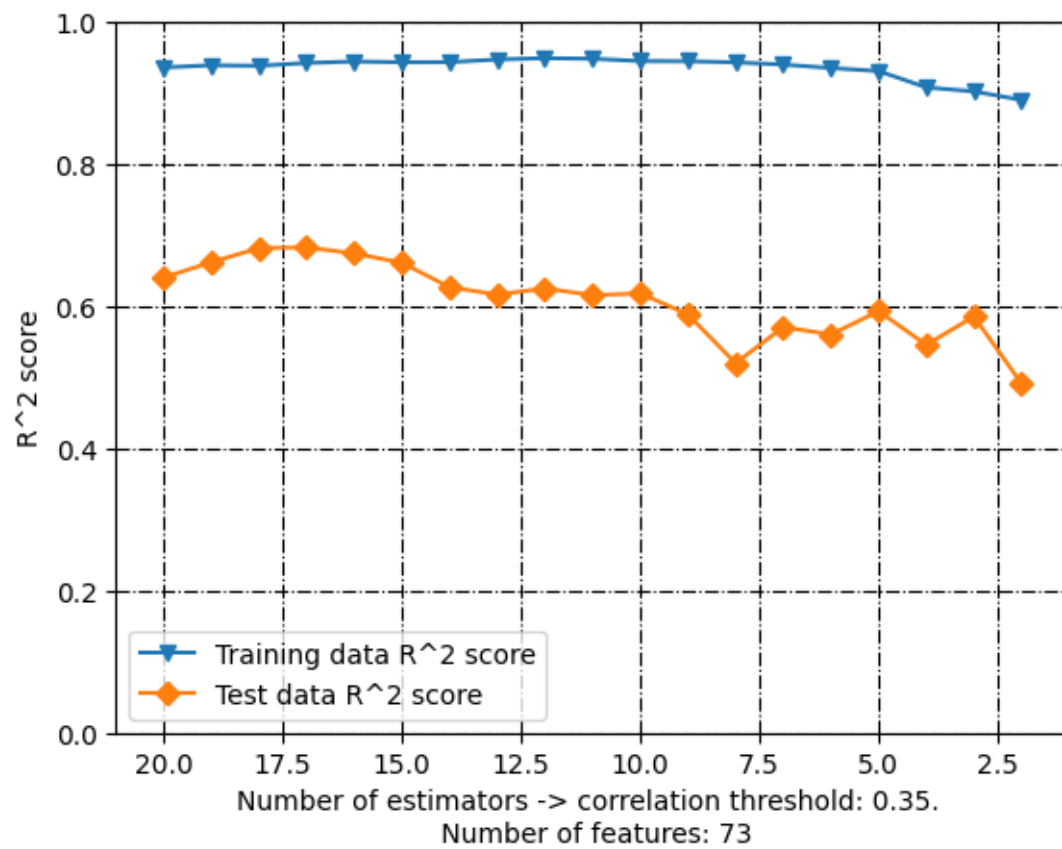

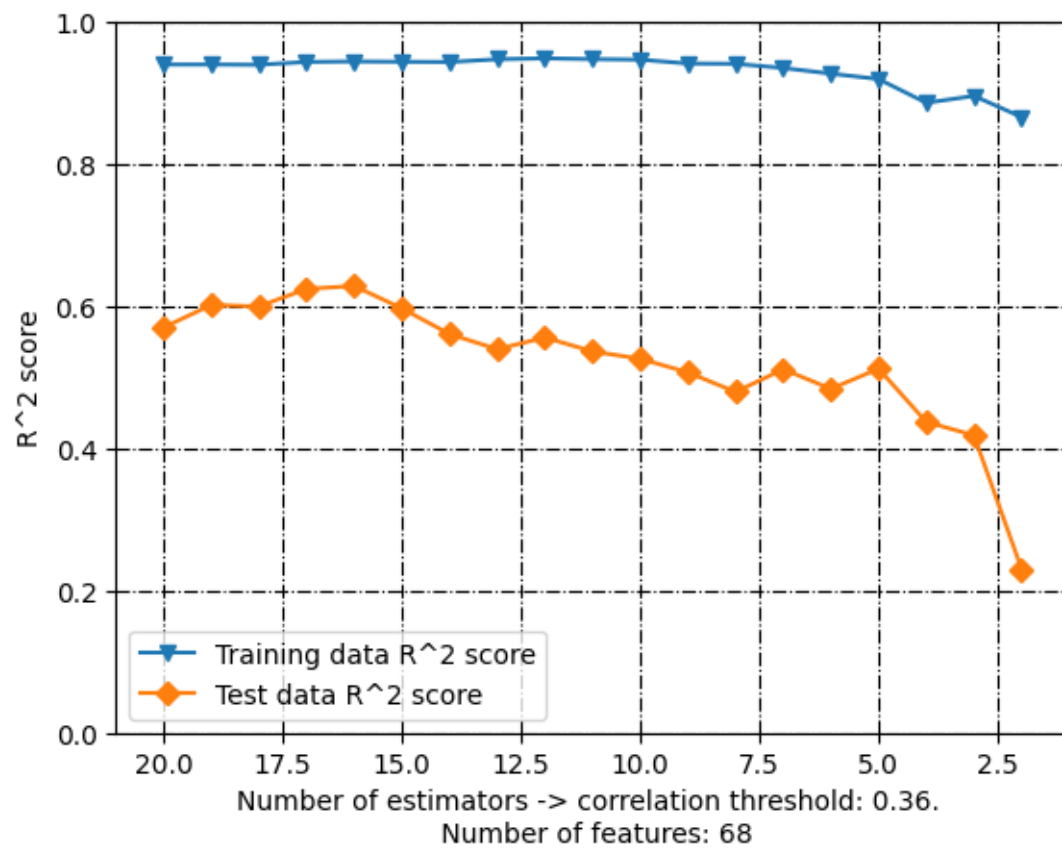

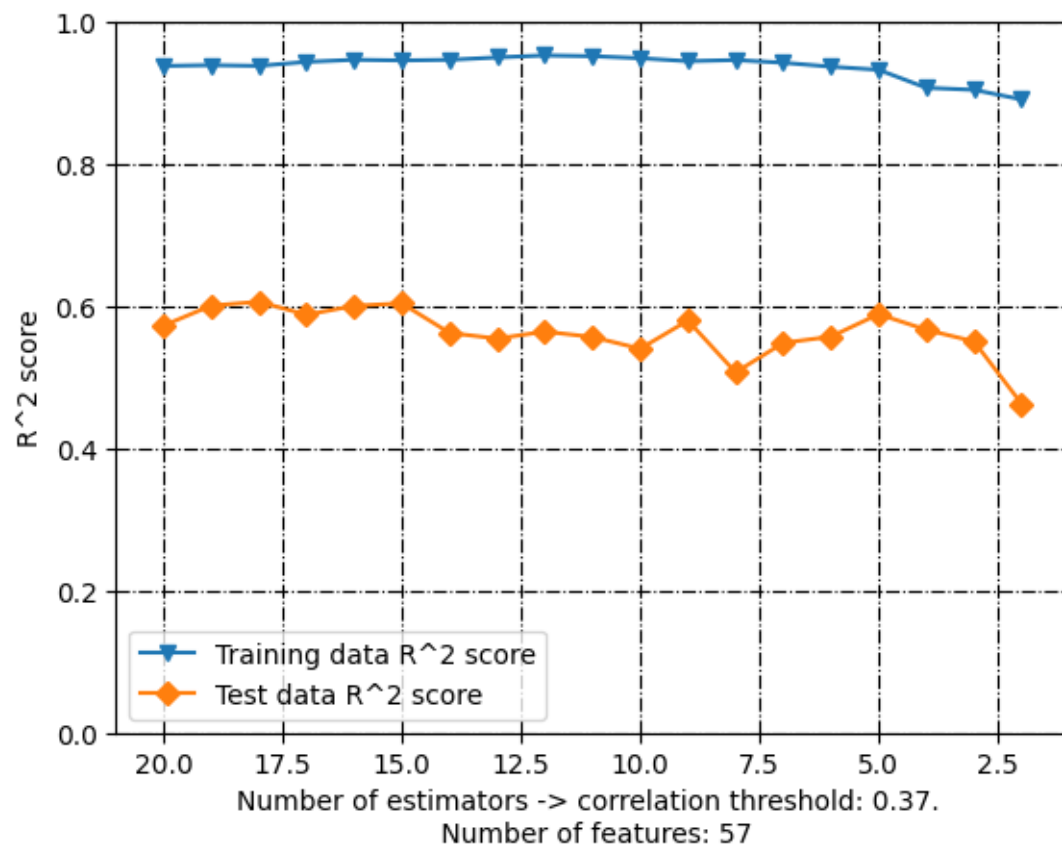

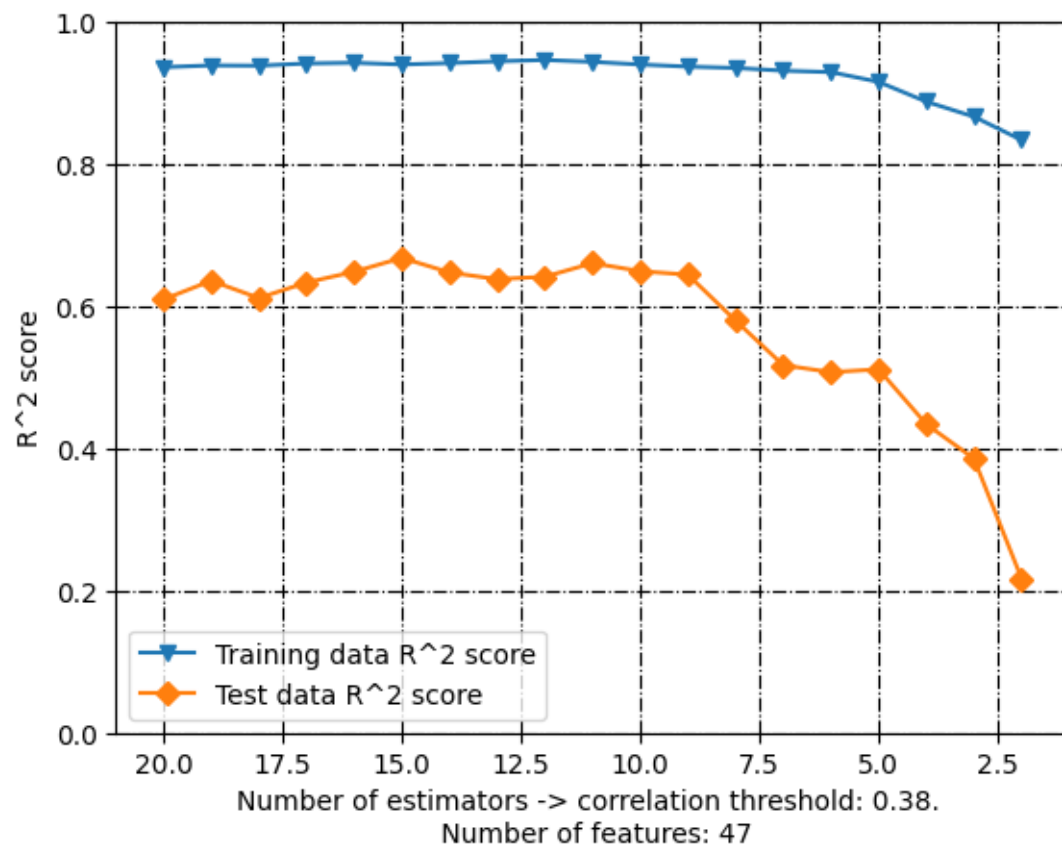

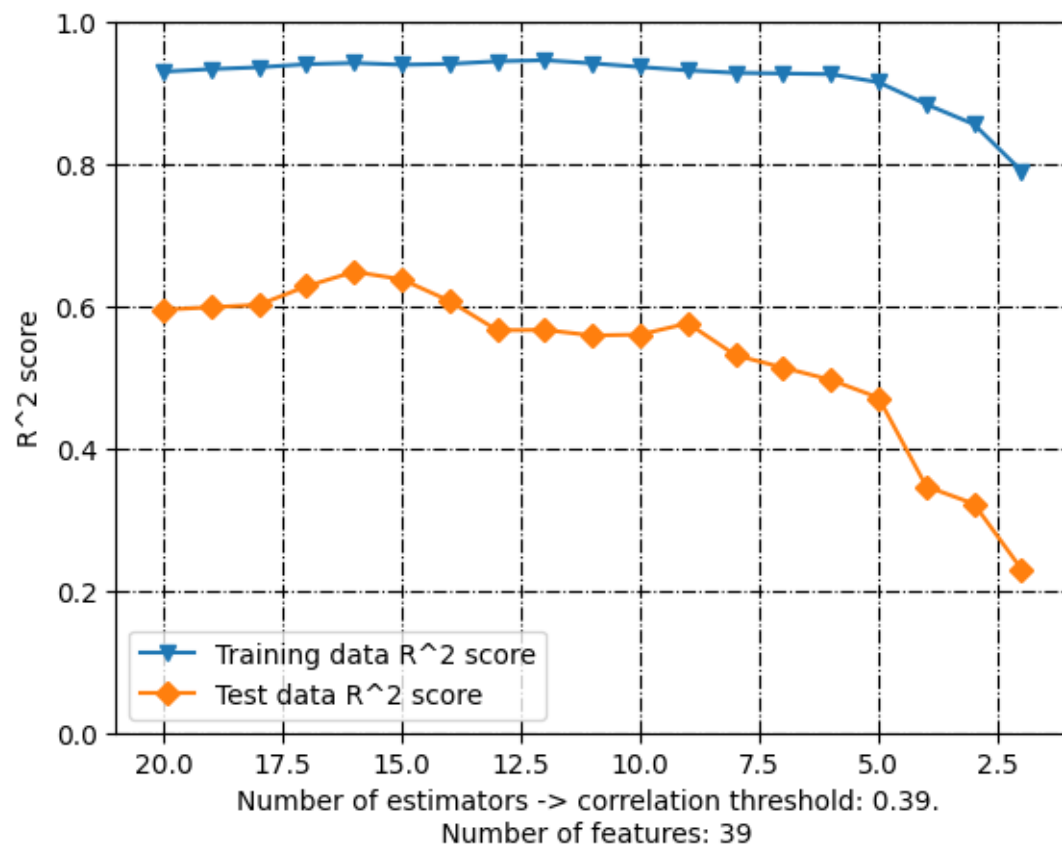

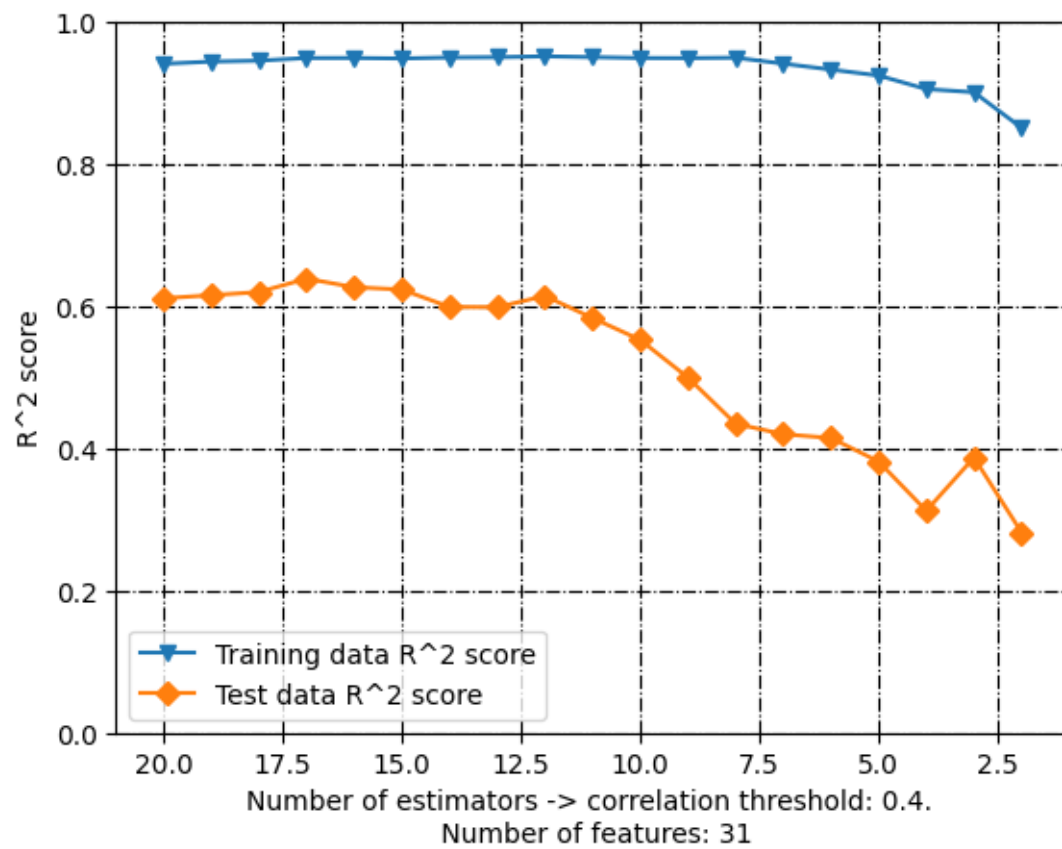

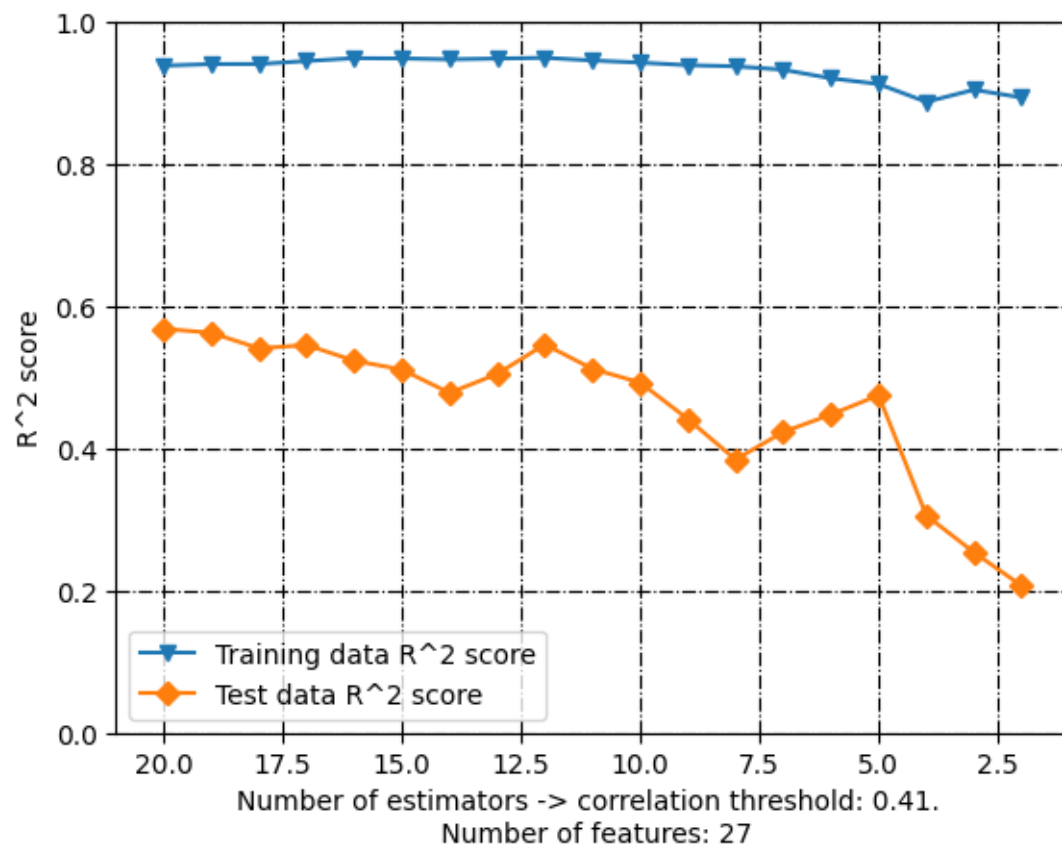

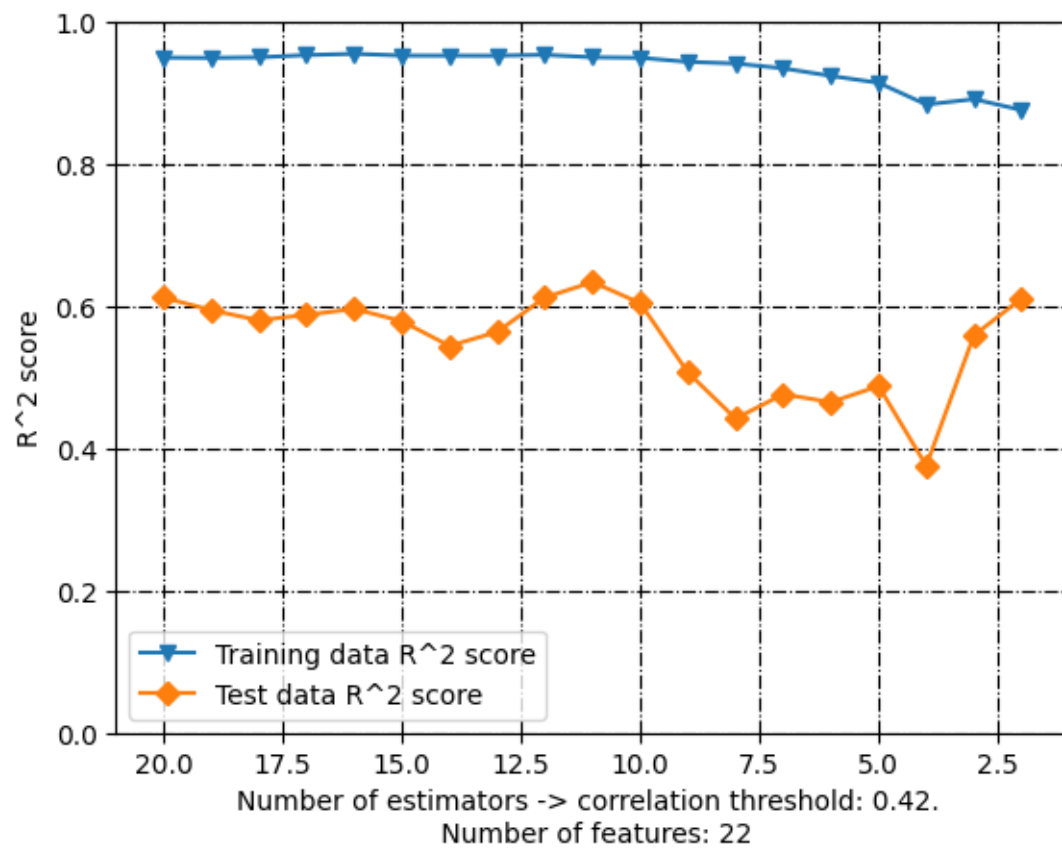



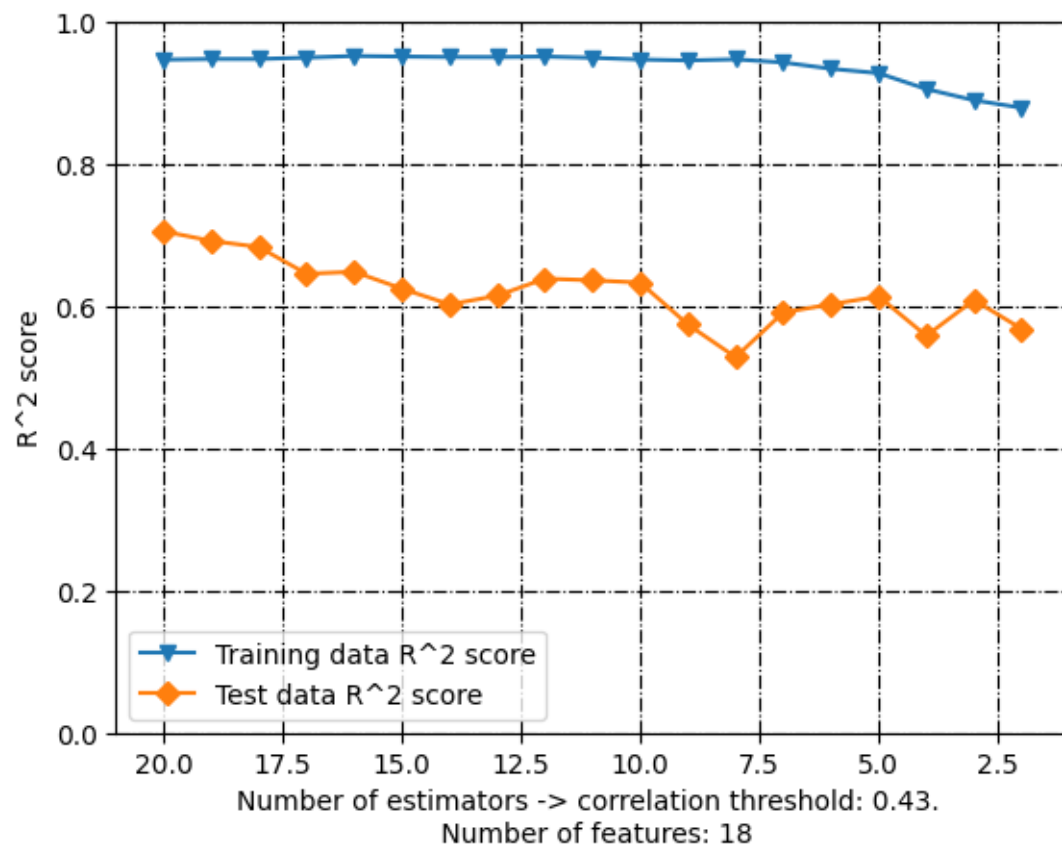

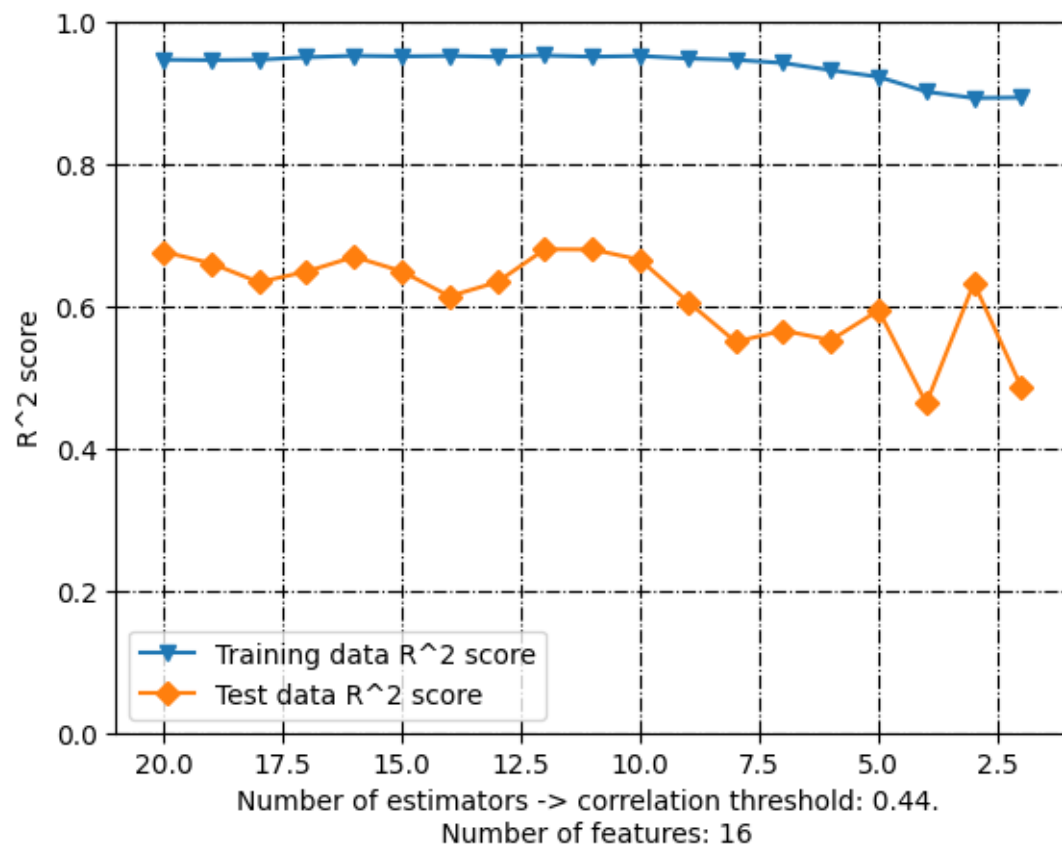

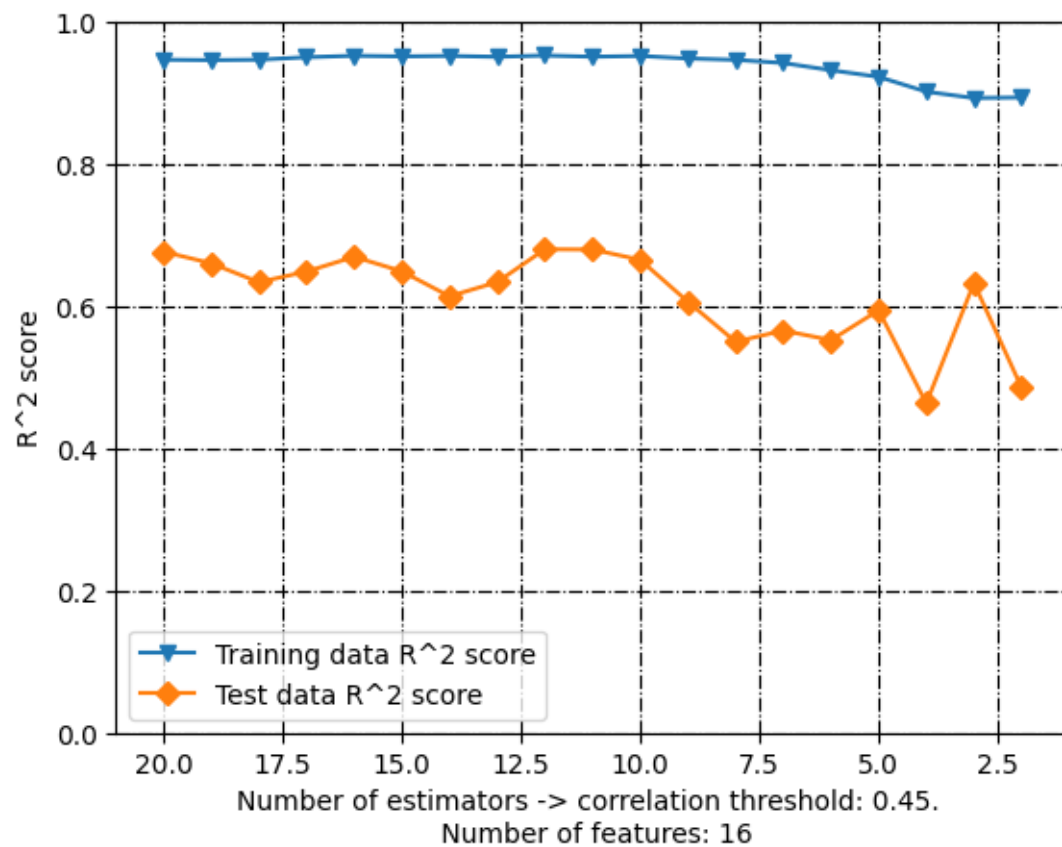

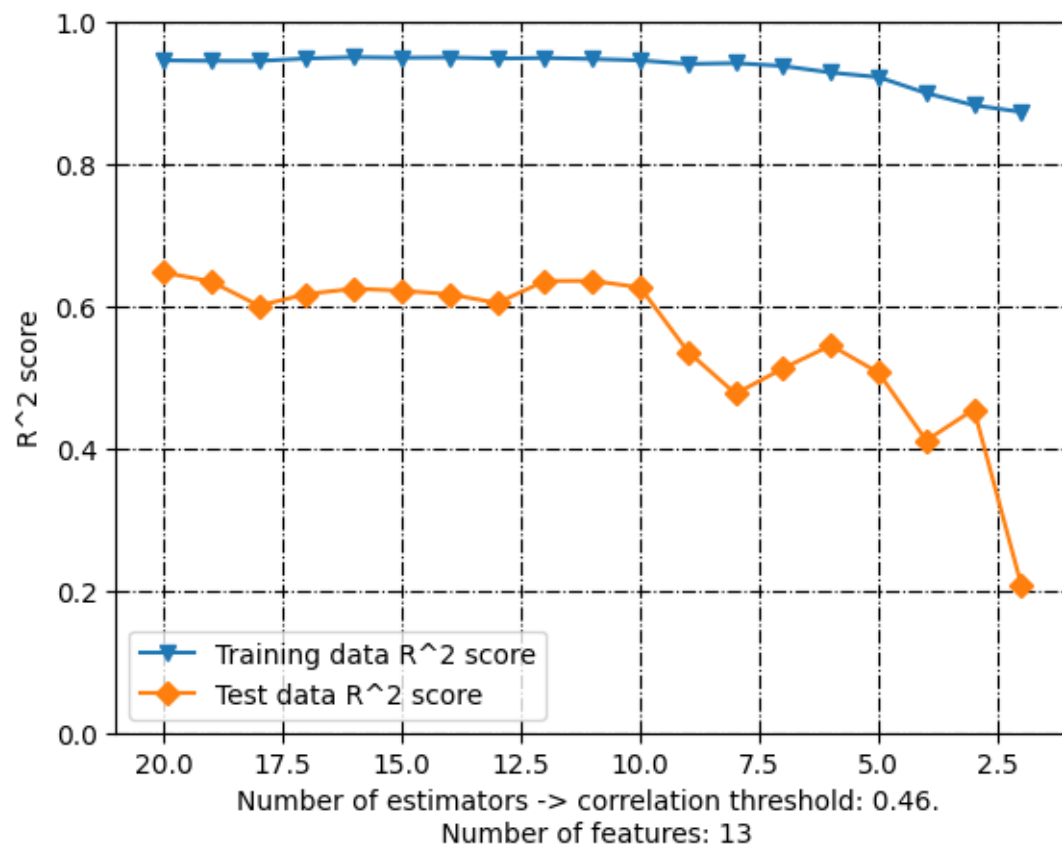

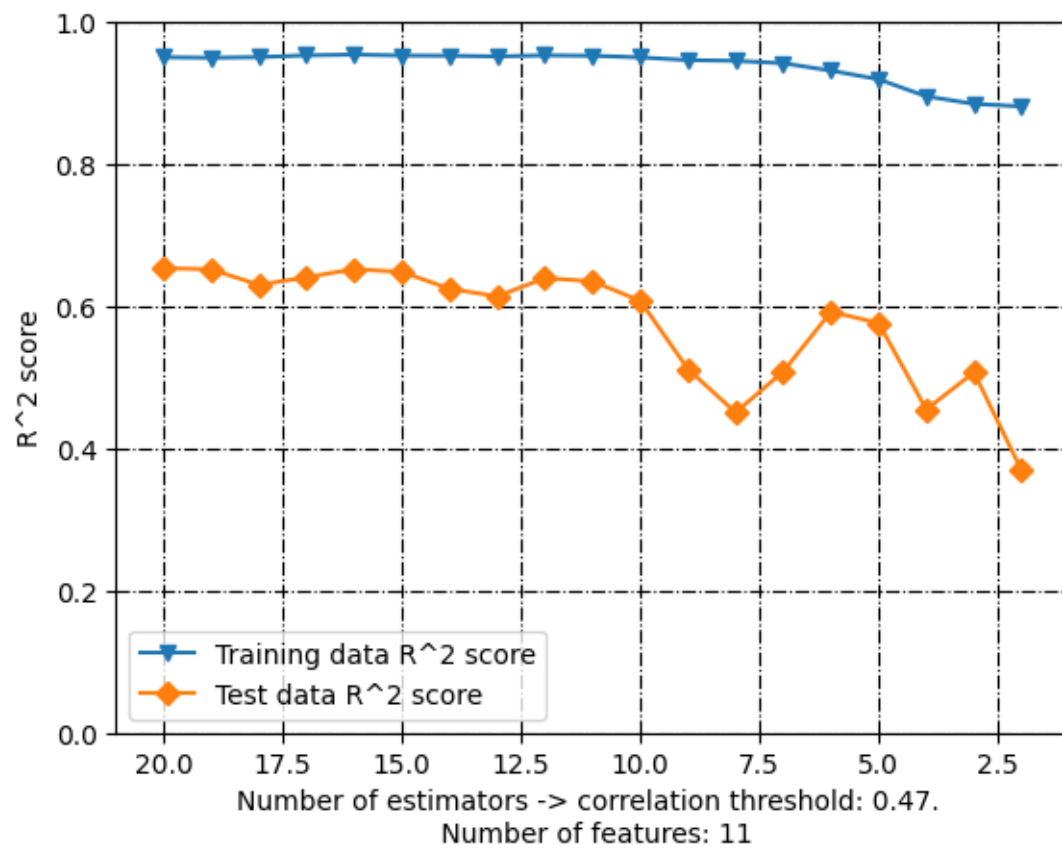

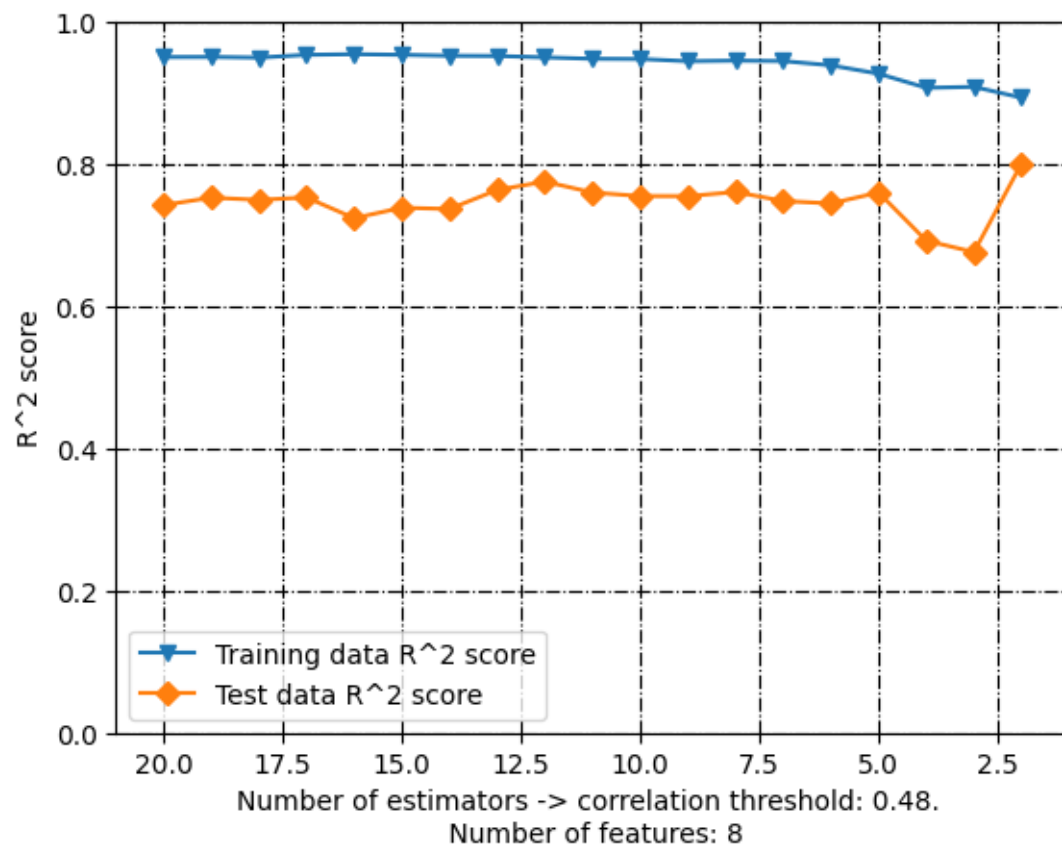

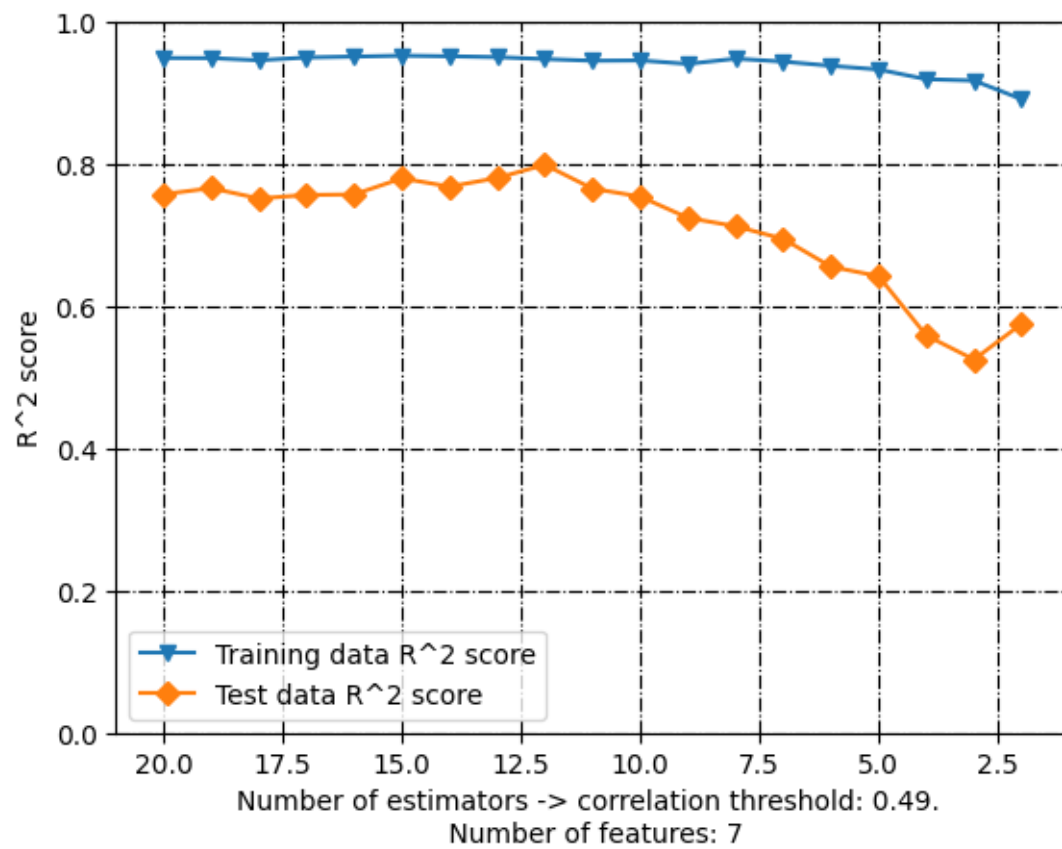

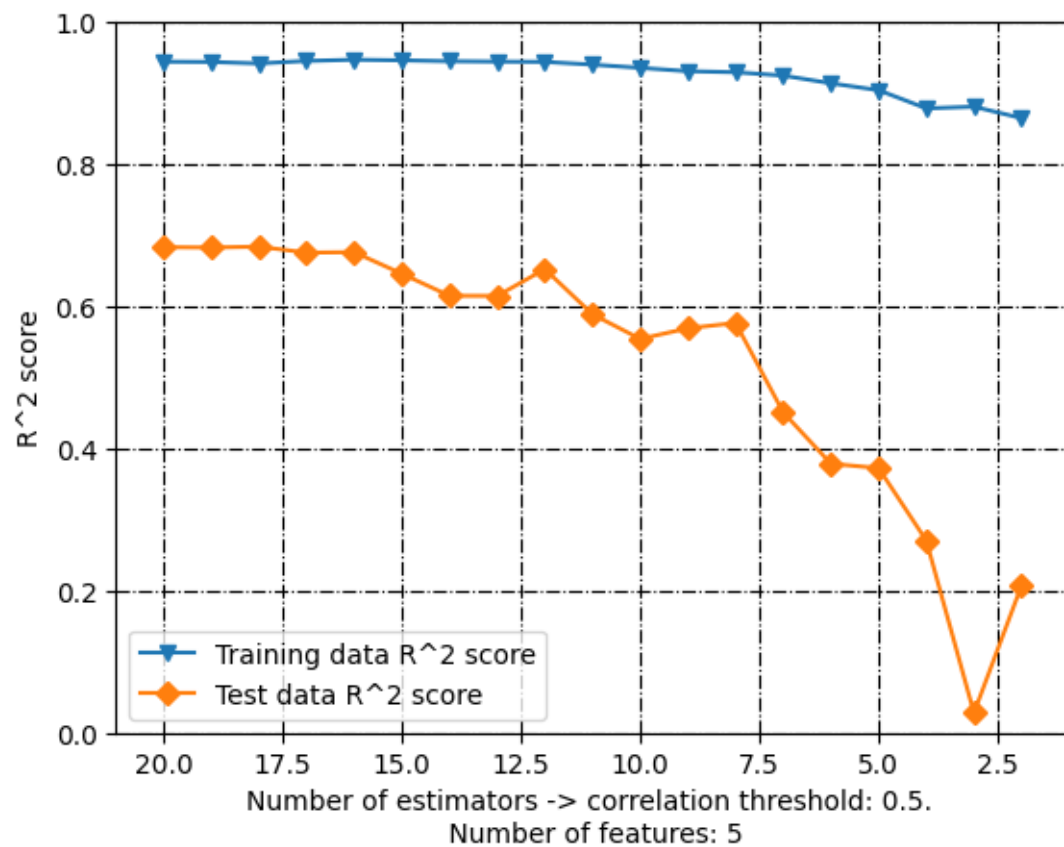



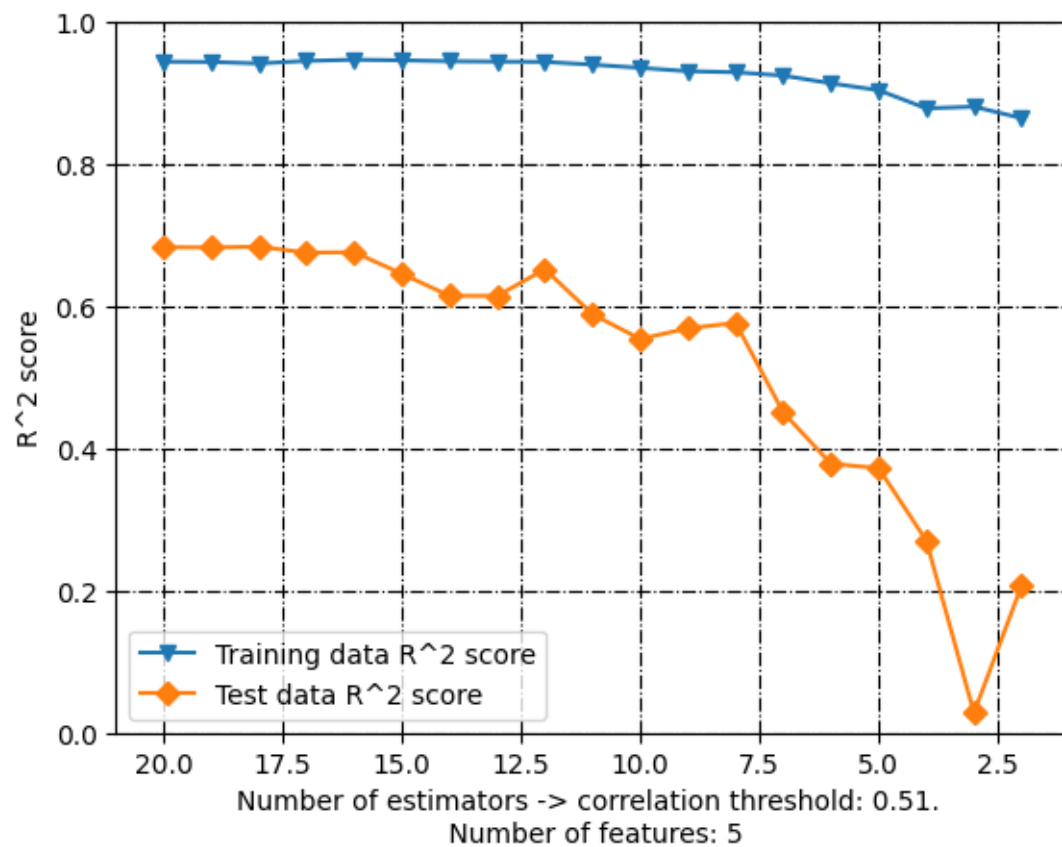

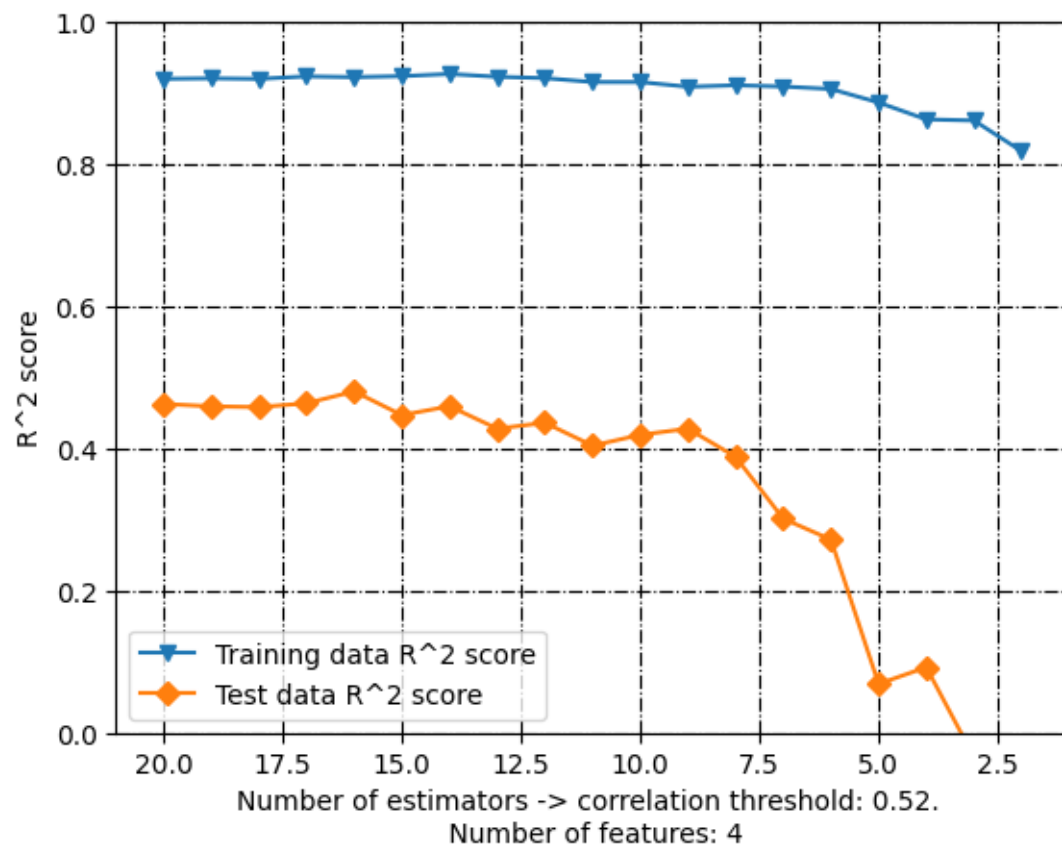

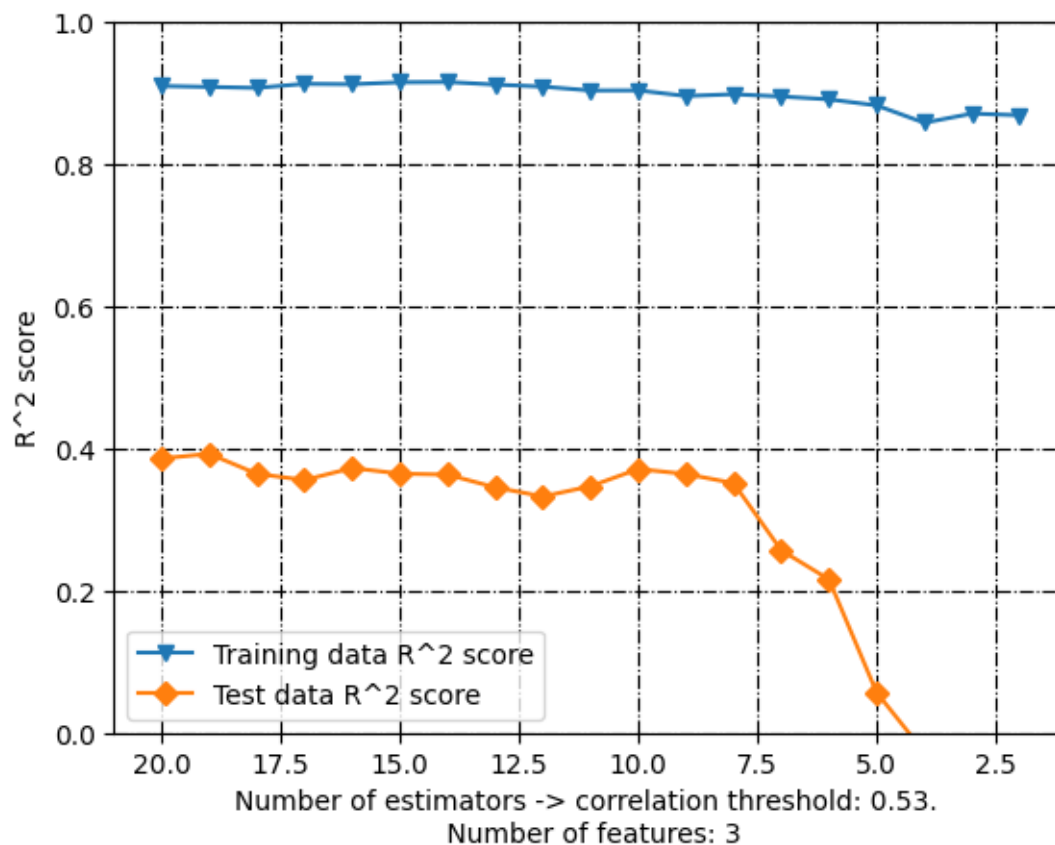

```
[28]: plt.plot(df_without_standardization['Correlation threshold'],  
             df_without_standardization['Number of features'], label = "Number of  
             features", marker='.')  
plt.legend()  
plt.xlabel('Correlation threshold')  
plt.ylabel('Number of features')  
plt.show()
```

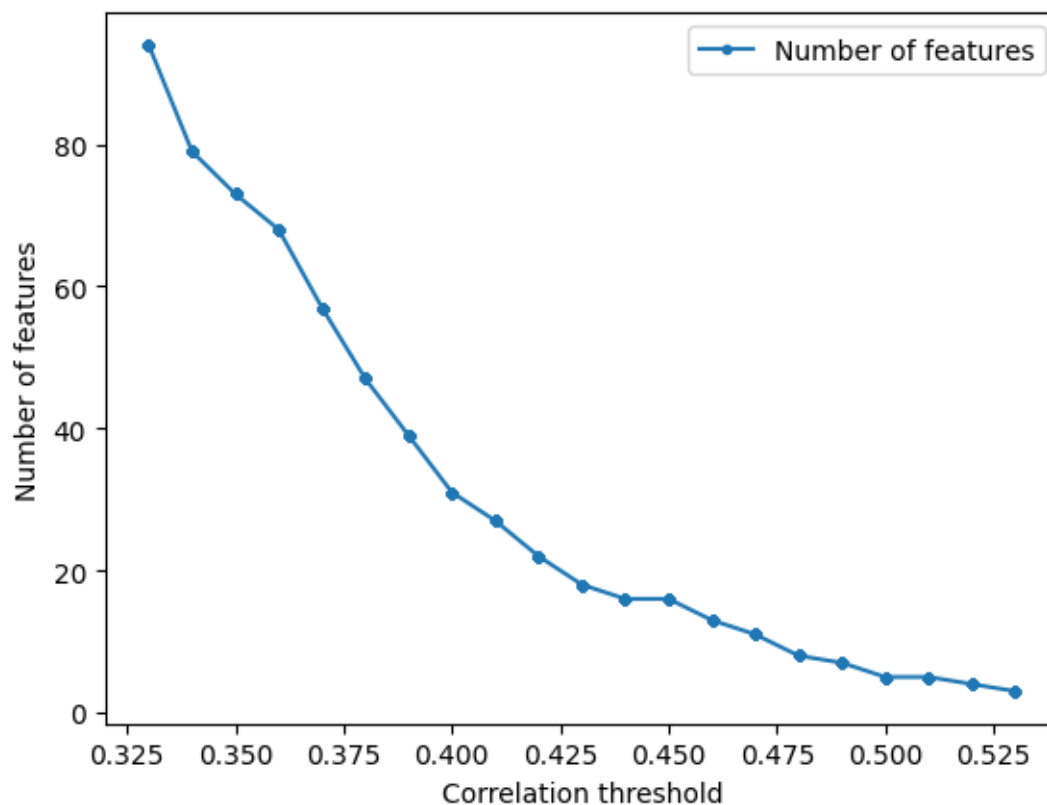

[ ]:

## 4 KNeighborsRegressor

```
[29]: without_standardization, train_r2_, test_r2_, hist1, hist2, target_column_name,
      ↪ training_data_RMSE, test_data_RMSE = pred_model.
      ↪ prepare_data_and_create_model(molecular_descriptors_df=data,
      ↪
      ↪         correlation_threshold=0.50,
      ↪
      ↪         standardization=False,
      ↪
      ↪         model_type='KNeighborsRegressor',
      ↪
      ↪         target_column_name = target,
      ↪
      ↪         random_state=random_state,
      ↪
      ↪         train_test_split_=True,
```



verbose=True)



I am not doing standardization...

```
molecular descriptor name
0          AATSOZ
1          AATSOare
2          AATSOd
3          AATSOdv
4          AATSOi
molecular descriptor name  corr_value
0          AATSOZ          -0.022797
1          AATSOare        -0.139064
2          AATSOd           0.027592
3          AATSOdv         -0.136049
4          AATSOi           0.168958
molecular descriptor name  corr_value  absolute correlation value
0          AATSOZ          -0.022797          0.022797
1          AATSOare        -0.139064          0.139064
2          AATSOd           0.027592          0.027592
3          AATSOdv         -0.136049          0.136049
4          AATSOi           0.168958          0.168958
molecular descriptor name  corr_value  absolute correlation value
226          AMID_0        -0.557717          0.557717
505          EState_VSA5   -0.534748          0.534748
791          MDEO-12       -0.555724          0.555724
921          SaasC          0.513071          0.513071
1091         VSA_EState5    0.526082          0.526082
molecular descriptor name  corr_value  absolute correlation value
226          AMID_0        -0.557717          0.557717
505          EState_VSA5   -0.534748          0.534748
791          MDEO-12       -0.555724          0.555724
921          SaasC          0.513071          0.513071
1091         VSA_EState5    0.526082          0.526082
The model used is: KNeighbors...
Return the coefficient of determination of the prediction:
0.04184254994027059
R^2 score: 0.6331583890645831
Correlation coefficient: 0.7957125040267893
Test data - unseen during training:
R^2 score: 0.04184254994027059
Correlation coefficient: 0.2045545158149059
[7.82808927  5.36946488  7.66040754  5.36946488  7.36955586  7.94867293
 7.97341012  7.91497614  5.86629945  7.36955586  8.14630219  7.59157705
 7.62943875  8.0759456   7.94867293  7.15646789  7.62615027  6.93758129]
113      7.823909
35       6.053057
101      6.721246
```

```

36      6.221126
100     7.130768
13      7.966576
0       7.966576
114     7.920819
104     8.309804
96      7.102373
40      7.920819
103     8.397940
48      7.853872
39      8.356547
14      8.148742
117     6.031517
21      7.325139
9       6.818728
Name: A549, dtype: float64
Training Root Mean Square Error: 0.5915919890634596
Testing Root Mean Square Error: 0.7606515443663695

```

```

[30]: print(target_column_name+str('_transformed'))
      print(hist1[target_column_name].hist())

```

```

A549_transformed
AxesSubplot(0.125,0.11;0.775x0.77)

```



```
[31]: with_standardization, train_r2_, test_r2_, hist1, hist2, target_column_name,
      ↪ training_data_RMSE, test_data_RMSE = pred_model.
      ↪ prepare_data_and_create_model(molecular_descriptors_df=data,
      ↪
      ↪         correlation_threshold=0.50,
      ↪
      ↪         standardization=True,
      ↪
      ↪         model_type='KNeighborsRegressor',
      ↪
      ↪         target_column_name = target,
      ↪
      ↪         random_state=random_state,
      ↪
      ↪         train_test_split_=True,
      ↪
      ↪         verbose=True)
```

I am doing standardization...

|      | molecular descriptor name |            |                            |
|------|---------------------------|------------|----------------------------|
| 0    | AATS0Z                    |            |                            |
| 1    | AATS0are                  |            |                            |
| 2    | AATS0d                    |            |                            |
| 3    | AATS0dv                   |            |                            |
| 4    | AATS0i                    |            |                            |
|      | molecular descriptor name | corr_value |                            |
| 0    | AATS0Z                    | -0.022797  |                            |
| 1    | AATS0are                  | -0.139064  |                            |
| 2    | AATS0d                    | 0.027592   |                            |
| 3    | AATS0dv                   | -0.136049  |                            |
| 4    | AATS0i                    | 0.168958   |                            |
|      | molecular descriptor name | corr_value | absolute correlation value |
| 0    | AATS0Z                    | -0.022797  | 0.022797                   |
| 1    | AATS0are                  | -0.139064  | 0.139064                   |
| 2    | AATS0d                    | 0.027592   | 0.027592                   |
| 3    | AATS0dv                   | -0.136049  | 0.136049                   |
| 4    | AATS0i                    | 0.168958   | 0.168958                   |
|      | molecular descriptor name | corr_value | absolute correlation value |
| 226  | AMID_0                    | -0.557717  | 0.557717                   |
| 505  | EState_VSA5               | -0.534748  | 0.534748                   |
| 791  | MDE0-12                   | -0.555724  | 0.555724                   |
| 921  | SaasC                     | 0.513071   | 0.513071                   |
| 1091 | VSA_EState5               | 0.526082   | 0.526082                   |
|      | molecular descriptor name | corr_value | absolute correlation value |
| 226  | AMID_0                    | -0.557717  | 0.557717                   |
| 505  | EState_VSA5               | -0.534748  | 0.534748                   |

|      |             |           |          |
|------|-------------|-----------|----------|
| 791  | MDE0-12     | -0.555724 | 0.555724 |
| 921  | SaasC       | 0.513071  | 0.513071 |
| 1091 | VSA_EState5 | 0.526082  | 0.526082 |

The model used is: KNeighbors...

Return the coefficient of determination of the prediction:

0.04184254994027059

R<sup>2</sup> score: 0.6331583890645831

Correlation coefficient: 0.7957125040267893

Test data - unseen during training:

R<sup>2</sup> score: 0.04184254994027059

Correlation coefficient: 0.2045545158149059

[7.82808927 5.36946488 7.66040754 5.36946488 7.36955586 7.94867293  
7.97341012 7.91497614 5.86629945 7.36955586 8.14630219 7.59157705  
7.62943875 8.0759456 7.94867293 7.15646789 7.62615027 6.93758129]

113 7.823909  
35 6.053057  
101 6.721246  
36 6.221126  
100 7.130768  
13 7.966576  
0 7.966576  
114 7.920819  
104 8.309804  
96 7.102373  
40 7.920819  
103 8.397940  
48 7.853872  
39 8.356547  
14 8.148742  
117 6.031517  
21 7.325139  
9 6.818728

Name: A549, dtype: float64

Training Root Mean Square Error: 0.5915919890634596

Testing Root Mean Square Error: 0.7606515443663695

#### 4.1 Search inside correlation space

```
[32]: step = 0.01
initial_step = corr_low
last_step = corr_high
first_list = [x / 100.0 for x in range(int(initial_step*100),
    ↪int(last_step*100), int(step*100))]
second_list = []
third_list = []
fourth_l = []
fifth_l = []
```



```

f_list = []
for i in first_list:
    without_standardization, train_r2, test_r2, _, h_, target_column_name, \
    ↪ training_data_RMSE, test_data_RMSE = pred_model.
    ↪ prepare_data_and_create_model(molecular_descriptors_df = data,

    ↪ correlation_threshold = i,

    ↪ standardization = False,

    ↪ model_type = 'KNeighborsRegressor',

    ↪ target_column_name = target,

    ↪ random_state=random_state,

    ↪ train_test_split_ = True,

    ↪ verbose = False)
    second_list.append(train_r2)
    third_list.append(test_r2)
    fourth_l.append(training_data_RMSE)
    fifth_l.append(test_data_RMSE)
    f_list.append(len(h_))

```

File "C:\Users\aleks\anaconda3\envs\cheminf\_gpu\lib\site-packages\joblib\externals\loky\backend\context.py", line 217, in \_count\_physical\_cores  
raise ValueError(

```

[33]: df_without_standardization = pd.DataFrame(data=first_list, \
    ↪ columns=["Correlation threshold"])
df_without_standardization['Training data R^2 score'] = second_list
df_without_standardization['Test data R^2 score'] = third_list
df_without_standardization['Training RMSE'] = fourth_l
df_without_standardization['Test RMSE'] = fifth_l
df_without_standardization['Number of features'] = f_list

```

```

[34]: df_k_nearest = df_without_standardization.copy()
df_without_standardization

```

```

[34]: Correlation threshold  Training data R^2 score  Test data R^2 score  \
0                0.33          0.420017          0.343014
1                0.34          0.619363         -0.102421
2                0.35          0.611502         -0.115525
3                0.36          0.602405         -0.103076
4                0.37          0.616706         -0.110209

```

|    |      |          |           |
|----|------|----------|-----------|
| 5  | 0.38 | 0.691690 | 0.281519  |
| 6  | 0.39 | 0.668597 | 0.292029  |
| 7  | 0.40 | 0.634598 | 0.193658  |
| 8  | 0.41 | 0.634598 | 0.193658  |
| 9  | 0.42 | 0.630124 | 0.184532  |
| 10 | 0.43 | 0.642788 | 0.224969  |
| 11 | 0.44 | 0.641698 | 0.224344  |
| 12 | 0.45 | 0.641698 | 0.224344  |
| 13 | 0.46 | 0.569757 | -0.097736 |
| 14 | 0.47 | 0.555440 | -0.040812 |
| 15 | 0.48 | 0.679077 | 0.100854  |
| 16 | 0.49 | 0.644649 | 0.064377  |
| 17 | 0.50 | 0.633158 | 0.041843  |
| 18 | 0.51 | 0.633158 | 0.041843  |
| 19 | 0.52 | 0.645061 | -0.235118 |
| 20 | 0.53 | 0.624328 | -0.270410 |

|    | Training RMSE | Test RMSE | Number of features |
|----|---------------|-----------|--------------------|
| 0  | 0.743859      | 0.629862  | 94                 |
| 1  | 0.602613      | 0.815908  | 79                 |
| 2  | 0.608804      | 0.820743  | 73                 |
| 3  | 0.615890      | 0.816150  | 68                 |
| 4  | 0.604712      | 0.818785  | 57                 |
| 5  | 0.542346      | 0.658681  | 47                 |
| 6  | 0.562291      | 0.653845  | 39                 |
| 7  | 0.590430      | 0.697794  | 31                 |
| 8  | 0.590430      | 0.697794  | 27                 |
| 9  | 0.594033      | 0.701731  | 22                 |
| 10 | 0.583776      | 0.684112  | 18                 |
| 11 | 0.584666      | 0.684387  | 16                 |
| 12 | 0.584666      | 0.684387  | 16                 |
| 13 | 0.640678      | 0.814172  | 13                 |
| 14 | 0.651251      | 0.792781  | 11                 |
| 15 | 0.553329      | 0.736856  | 8                  |
| 16 | 0.582253      | 0.751654  | 7                  |
| 17 | 0.591592      | 0.760652  | 5                  |
| 18 | 0.591592      | 0.760652  | 5                  |
| 19 | 0.581916      | 0.863618  | 4                  |
| 20 | 0.598670      | 0.875869  | 3                  |

## 4.2 Plots

```
[35]: plt.plot(df_without_standardization['Correlation threshold'],
↳df_without_standardization['Training data R^2 score'], label = "Training
↳data R^2 score", marker='v')
```

```
plt.plot(df_without_standardization['Correlation threshold'],  
         df_without_standardization['Test data R^2 score'], label = "Test data R^2 score", marker='D')  
plt.legend()  
plt.xlabel('Correlation threshold')  
plt.ylabel('R^2 score')  
plt.ylim([0, 1])  
plt.show()
```

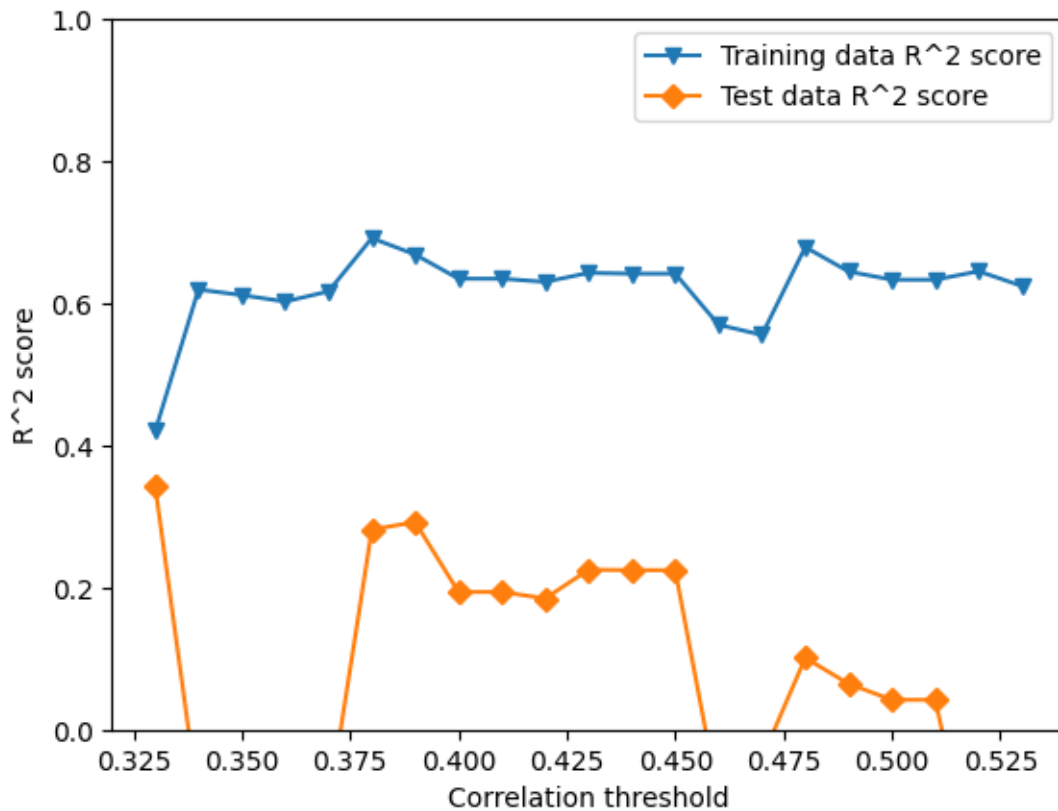

```
[36]: plt.plot(df_without_standardization['Correlation threshold'],  
              df_without_standardization['Number of features'], label = "Number of features", marker='.')  
plt.legend()  
plt.xlabel('Correlation threshold')  
plt.ylabel('Number of features')  
plt.show()
```



[ ]:

## 5 Support Vector Machines (SVM)

```
[37]: without_standardization, train_r2_, test_r2_, hist1, hist2, target_column_name,
      ↪ training_data_RMSE, test_data_RMSE = pred_model.
      ↪ prepare_data_and_create_model(molecular_descriptors_df=data,
      ↪
      ↪         correlation_threshold=0.50,
      ↪
      ↪         standardization=False,
      ↪
      ↪         model_type='SVR',
      ↪
      ↪         kernel_ = 'linear',
      ↪
      ↪         gamma_ = 'auto',
      ↪
      ↪         target_column_name = target,
```

```

↪          random_state=random_state,
↪
↪          train_test_split_=True,
↪
↪          verbose=True)

```

I am not doing standardization...

|   | molecular descriptor name |  |
|---|---------------------------|--|
| 0 | AATSOZ                    |  |
| 1 | AATSOare                  |  |
| 2 | AATSOd                    |  |
| 3 | AATSOdv                   |  |
| 4 | AATSOi                    |  |

  

|   | molecular descriptor name | corr_value |
|---|---------------------------|------------|
| 0 | AATSOZ                    | -0.022797  |
| 1 | AATSOare                  | -0.139064  |
| 2 | AATSOd                    | 0.027592   |
| 3 | AATSOdv                   | -0.136049  |
| 4 | AATSOi                    | 0.168958   |

  

|   | molecular descriptor name | corr_value | absolute correlation value |
|---|---------------------------|------------|----------------------------|
| 0 | AATSOZ                    | -0.022797  | 0.022797                   |
| 1 | AATSOare                  | -0.139064  | 0.139064                   |
| 2 | AATSOd                    | 0.027592   | 0.027592                   |
| 3 | AATSOdv                   | -0.136049  | 0.136049                   |
| 4 | AATSOi                    | 0.168958   | 0.168958                   |

  

|      | molecular descriptor name | corr_value | absolute correlation value |
|------|---------------------------|------------|----------------------------|
| 226  | AMID_0                    | -0.557717  | 0.557717                   |
| 505  | EState_VSA5               | -0.534748  | 0.534748                   |
| 791  | MDEO-12                   | -0.555724  | 0.555724                   |
| 921  | SaasC                     | 0.513071   | 0.513071                   |
| 1091 | VSA_EState5               | 0.526082   | 0.526082                   |

  

|      | molecular descriptor name | corr_value | absolute correlation value |
|------|---------------------------|------------|----------------------------|
| 226  | AMID_0                    | -0.557717  | 0.557717                   |
| 505  | EState_VSA5               | -0.534748  | 0.534748                   |
| 791  | MDEO-12                   | -0.555724  | 0.555724                   |
| 921  | SaasC                     | 0.513071   | 0.513071                   |
| 1091 | VSA_EState5               | 0.526082   | 0.526082                   |

The model used is: SVR...

Return the coefficient of determination of the prediction:

0.32851122549444245

R<sup>2</sup> score: 0.45734753152418484

Correlation coefficient: 0.6762747455910096

Test data - unseen during training:

R<sup>2</sup> score: 0.32851122549444245

Correlation coefficient: 0.5731589879731822

[8.01131583 6.40143028 7.71342937 6.4509997 7.79496933 7.71369879

```

7.8148241 8.15682258 6.70338719 7.77214303 7.96205722 7.91996377
7.9676105 7.59625243 7.69566933 6.9732833 7.9711214 6.41709421]
113      7.823909
35       6.053057
101      6.721246
36       6.221126
100      7.130768
13       7.966576
0        7.966576
114      7.920819
104      8.309804
96       7.102373
40       7.920819
103      8.397940
48       7.853872
39       8.356547
14       8.148742
117      6.031517
21       7.325139
9        6.818728

```

Name: A549, dtype: float64

Training Root Mean Square Error: 0.7195216728556674

Testing Root Mean Square Error: 0.6367760041839747

```
[38]: print(target_column_name+str('_transformed'))
      print(hist1[target_column_name].hist())
```

A549\_transformed

AxesSubplot(0.125,0.11;0.775x0.77)



```
[39]: with_standardization, train_r2_, test_r2_, hist1, hist2, target_column_name,
      ↪ training_data_RMSE, test_data_RMSE = pred_model.
      ↪ prepare_data_and_create_model(molecular_descriptors_df=data,
      ↪
      ↪         correlation_threshold=0.50,
      ↪
      ↪         standardization=True,
      ↪
      ↪         model_type='SVR',
      ↪
      ↪         kernel_ = 'linear',
      ↪
      ↪         gamma_ = 'auto',
      ↪
      ↪         target_column_name = target,
      ↪
      ↪         random_state=random_state,
      ↪
      ↪         train_test_split_=True,
      ↪
      ↪         verbose=True)
```

I am doing standardization...

molecular descriptor name

|   |          |
|---|----------|
| 0 | AATSOZ   |
| 1 | AATSOare |
| 2 | AATSOd   |
| 3 | AATSOdv  |
| 4 | AATSOi   |

|   | molecular descriptor name | corr_value |
|---|---------------------------|------------|
| 0 | AATSOZ                    | -0.022797  |
| 1 | AATSOare                  | -0.139064  |
| 2 | AATSOd                    | 0.027592   |
| 3 | AATSOdv                   | -0.136049  |
| 4 | AATSOi                    | 0.168958   |

|   | molecular descriptor name | corr_value | absolute correlation value |
|---|---------------------------|------------|----------------------------|
| 0 | AATSOZ                    | -0.022797  | 0.022797                   |
| 1 | AATSOare                  | -0.139064  | 0.139064                   |
| 2 | AATSOd                    | 0.027592   | 0.027592                   |
| 3 | AATSOdv                   | -0.136049  | 0.136049                   |
| 4 | AATSOi                    | 0.168958   | 0.168958                   |

|      | molecular descriptor name | corr_value | absolute correlation value |
|------|---------------------------|------------|----------------------------|
| 226  | AMID_0                    | -0.557717  | 0.557717                   |
| 505  | EState_VSA5               | -0.534748  | 0.534748                   |
| 791  | MDEO-12                   | -0.555724  | 0.555724                   |
| 921  | SaasC                     | 0.513071   | 0.513071                   |
| 1091 | VSA_EState5               | 0.526082   | 0.526082                   |

|      | molecular descriptor name | corr_value | absolute correlation value |
|------|---------------------------|------------|----------------------------|
| 226  | AMID_0                    | -0.557717  | 0.557717                   |
| 505  | EState_VSA5               | -0.534748  | 0.534748                   |
| 791  | MDEO-12                   | -0.555724  | 0.555724                   |
| 921  | SaasC                     | 0.513071   | 0.513071                   |
| 1091 | VSA_EState5               | 0.526082   | 0.526082                   |

The model used is: SVR...

Return the coefficient of determination of the prediction:

0.32851122549444245

R<sup>2</sup> score: 0.45734753152418484

Correlation coefficient: 0.6762747455910096

Test data - unseen during training:

R<sup>2</sup> score: 0.32851122549444245

Correlation coefficient: 0.5731589879731822

[8.01131583 6.40143028 7.71342937 6.4509997 7.79496933 7.71369879  
7.8148241 8.15682258 6.70338719 7.77214303 7.96205722 7.91996377  
7.9676105 7.59625243 7.69566933 6.9732833 7.9711214 6.41709421]

|     |          |
|-----|----------|
| 113 | 7.823909 |
| 35  | 6.053057 |
| 101 | 6.721246 |
| 36  | 6.221126 |
| 100 | 7.130768 |
| 13  | 7.966576 |



```

0      7.966576
114    7.920819
104    8.309804
96     7.102373
40     7.920819
103    8.397940
48     7.853872
39     8.356547
14     8.148742
117    6.031517
21     7.325139
9      6.818728
Name: A549, dtype: float64
Training Root Mean Square Error: 0.7195216728556674
Testing Root Mean Square Error: 0.6367760041839747

```

## 5.1 Search inside correlation space

```

[40]: step = 0.01
      initial_step = corr_low
      last_step = corr_high
      first_list = [x / 100.0 for x in range(int(initial_step*100),
      ↪int(last_step*100), int(step*100))]
      second_list = []
      third_list = []
      fourth_l = []
      fifth_l = []
      f_list = []
      for i in first_list:
          without_standardization, train_r2, test_r2, _, h_, target_column_name,
          ↪training_data_RMSE, test_data_RMSE = pred_model.
          ↪prepare_data_and_create_model(molecular_descriptors_df = data,

          ↪
          ↪correlation_threshold = i,

          ↪
          ↪standardization = False,

          ↪
          ↪model_type = 'SVR',

          ↪
          ↪kernel_ = 'linear',

          ↪
          ↪gamma_ = 'auto',

          ↪
          ↪target_column_name = target,

          ↪
          ↪random_state=random_state,

```

```

    ↪          train_test_split_ = True,

    ↪          verbose = False)
    second_list.append(train_r2)
    third_list.append(test_r2)
    fourth_l.append(training_data_RMSE)
    fifth_l.append(test_data_RMSE)
    f_list.append(len(h_))

```

```

[41]: df_without_standardization = pd.DataFrame(data=first_list,
    ↪      columns=["Correlation threshold"])
df_without_standardization['Training data R^2 score'] = second_list
df_without_standardization['Test data R^2 score'] = third_list
df_without_standardization['Training RMSE'] = fourth_l
df_without_standardization['Test RMSE'] = fifth_l
df_without_standardization['Number of features'] = f_list

```

```

[42]: df_svm = df_without_standardization.copy()
df_without_standardization

```

```

[42]:
Correlation threshold  Training data R^2 score  Test data R^2 score  \
0                    0.33                    0.815717          -0.376776
1                    0.34                    0.777201          -0.358594
2                    0.35                    0.777664          -0.306293
3                    0.36                    0.755687          -0.480017
4                    0.37                    0.744621          -0.513089
5                    0.38                    0.688560           0.099718
6                    0.39                    0.629787           0.282437
7                    0.40                    0.617305           0.228248
8                    0.41                    0.619835           0.206096
9                    0.42                    0.603365           0.214260
10                   0.43                    0.589163           0.291468
11                   0.44                    0.587385           0.361184
12                   0.45                    0.587385           0.361184
13                   0.46                    0.562318           0.382766
14                   0.47                    0.531856           0.481550
15                   0.48                    0.498493           0.408974
16                   0.49                    0.458901           0.351259
17                   0.50                    0.457348           0.328511
18                   0.51                    0.457348           0.328511
19                   0.52                    0.452975           0.285737
20                   0.53                    0.436320           0.284990

Training RMSE  Test RMSE  Number of features
0          0.419301    0.911799             94
1          0.461041    0.905758             79

```

|    |          |          |    |
|----|----------|----------|----|
| 2  | 0.460561 | 0.888153 | 73 |
| 3  | 0.482788 | 0.945368 | 68 |
| 4  | 0.493600 | 0.955872 | 57 |
| 5  | 0.545092 | 0.737321 | 47 |
| 6  | 0.594304 | 0.658260 | 39 |
| 7  | 0.604240 | 0.682663 | 31 |
| 8  | 0.602239 | 0.692391 | 27 |
| 9  | 0.615147 | 0.688821 | 22 |
| 10 | 0.626062 | 0.654104 | 18 |
| 11 | 0.627416 | 0.621091 | 16 |
| 12 | 0.627416 | 0.621091 | 16 |
| 13 | 0.646193 | 0.610509 | 13 |
| 14 | 0.668302 | 0.559527 | 11 |
| 15 | 0.691706 | 0.597407 | 8  |
| 16 | 0.718491 | 0.625897 | 7  |
| 17 | 0.719522 | 0.636776 | 5  |
| 18 | 0.719522 | 0.636776 | 5  |
| 19 | 0.722415 | 0.656744 | 4  |
| 20 | 0.733330 | 0.657088 | 3  |

## 5.2 Plots

```
[43]: plt.plot(df_without_standardization['Correlation threshold'],
    ↪df_without_standardization['Training data R^2 score'], label = "Training
    ↪data R^2 score", marker='v')
plt.plot(df_without_standardization['Correlation threshold'],
    ↪df_without_standardization['Test data R^2 score'], label = "Test data R^2
    ↪score", marker='D')
plt.legend()
plt.xlabel('Correlation threshold')
plt.ylabel('R^2 score')
plt.ylim([0, 1])
plt.show()
```

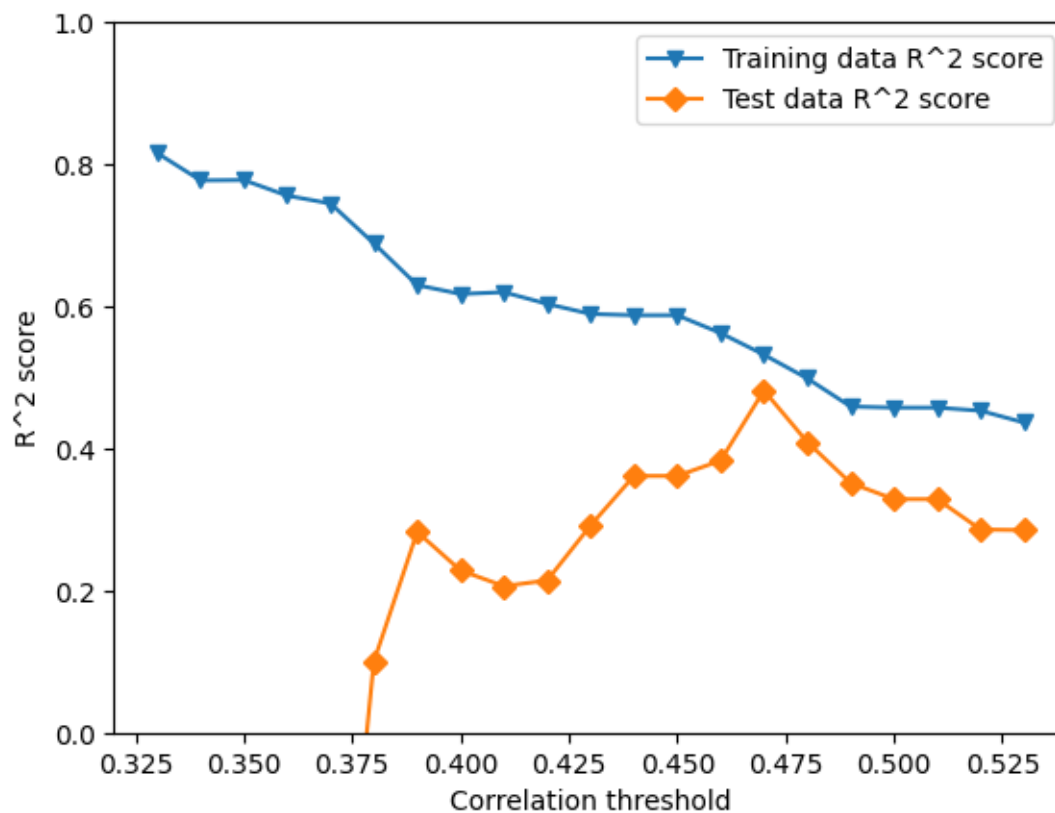

```
[44]: plt.plot(df_without_standardization['Correlation threshold'],  
            df_without_standardization['Number of features'], label = "Number of  
            features", marker='.')  
plt.legend()  
plt.xlabel('Correlation threshold')  
plt.ylabel('Number of features')  
plt.show()
```



### 5.3 Store quality measurements

```
[45]: with pd.ExcelWriter('../Data/Quality_'+str(target)+'_'+str(random_state)+'_'.  
      ↪ 'xlsx') as writer:  
      df_linear.to_excel(writer, sheet_name='MLR')  
      df_decision_tree.to_excel(writer, sheet_name='DT')  
      df_random_forest.to_excel(writer, sheet_name='RF')  
      df_k_nearest.to_excel(writer, sheet_name='KNN')  
      df_svm.to_excel(writer, sheet_name='SVM')
```

# Notebook

January 18, 2024

## 1 File 17

```
[1]: import sys
from pathlib import Path
prediction_mode_path = Path("../module")
sys.path.append(prediction_mode_path.as_posix())
import models_creation as pred_model

import pandas as pd
import numpy as np

from sklearn.metrics import r2_score

import matplotlib.pyplot as plt
from sklearn.tree import plot_tree

from matplotlib import pyplot as plt

import joblib

import warnings
warnings.filterwarnings('ignore')
```

```
[2]: load_prepared_data = pd.read_excel('../Data/Kolchicyna_machine_learning.xlsx')
load_prepared_data = load_prepared_data.drop(columns=['Unnamed: 0'])

target = 'A549'

corr_low = 0.33
corr_high = 0.54

random_state = 42
```

```
[3]: load_prepared_data.head()
```

```
[3]:
```

|   | AATSOZ    | AATSOare | AATSOd   | AATSOdv  | AATSOi     | AATSOm    | AATSOp   | \ |
|---|-----------|----------|----------|----------|------------|-----------|----------|---|
| 0 | 25.090909 | 6.046518 | 3.109091 | 6.662626 | 160.775045 | 99.075564 | 1.555512 |   |
| 1 | 24.448276 | 6.008422 | 3.051724 | 6.386973 | 161.021674 | 96.473315 | 1.538471 |   |

|   |           |          |          |          |            |           |          |
|---|-----------|----------|----------|----------|------------|-----------|----------|
| 2 | 23.868852 | 5.974074 | 3.000000 | 6.138434 | 161.244045 | 94.127025 | 1.523105 |
| 3 | 23.868852 | 5.974074 | 3.032787 | 6.171220 | 161.244045 | 94.127025 | 1.523105 |
| 4 | 23.343750 | 5.942945 | 2.953125 | 5.913194 | 161.445569 | 92.000700 | 1.509180 |

|   | AATS0pe  | AATS0s   | AATS0se  | ... | A549_float | MCF-7_float | LoVo_float | \ |
|---|----------|----------|----------|-----|------------|-------------|------------|---|
| 0 | 6.126680 | 3.435416 | 7.629859 | ... | 10.8       | 10.3        | 6.5        |   |
| 1 | 6.088791 | 3.330998 | 7.596891 | ... | 11.6       | 12.0        | 8.5        |   |
| 2 | 6.054630 | 3.236850 | 7.567166 | ... | 10.9       | 12.2        | 8.8        |   |
| 3 | 6.054630 | 3.257798 | 7.567166 | ... | 10.5       | 11.3        | 8.5        |   |
| 4 | 6.023670 | 3.151529 | 7.540228 | ... | 89.5       | 92.7        | 52.8       |   |

|   | LoVo/DX_float | BALB/3T3_float | A549_float_transformed | \ |
|---|---------------|----------------|------------------------|---|
| 0 | 54.9          | 10.2           | 7.966576               |   |
| 1 | 31.1          | 14.3           | 7.935542               |   |
| 2 | 17.9          | 11.7           | 7.962574               |   |
| 3 | 10.2          | 11.0           | 7.978811               |   |
| 4 | 77.8          | 99.4           | 7.048177               |   |

|   | MCF-7_float_transformed | LoVo_float_transformed | LoVo/DX_float_transformed | \ |
|---|-------------------------|------------------------|---------------------------|---|
| 0 | 7.987163                | 8.187087               | 7.260428                  |   |
| 1 | 7.920819                | 8.070581               | 7.507240                  |   |
| 2 | 7.913640                | 8.055517               | 7.747147                  |   |
| 3 | 7.946922                | 8.070581               | 7.991400                  |   |
| 4 | 7.032920                | 7.277366               | 7.109020                  |   |

|   | BALB/3T3_float_transformed |
|---|----------------------------|
| 0 | 7.991400                   |
| 1 | 7.844664                   |
| 2 | 7.931814                   |
| 3 | 7.958607                   |
| 4 | 7.002614                   |

[5 rows x 1221 columns]

```
[4]: data = load_prepared_data[list(load_prepared_data.columns)[0:-10]]
data[target] = load_prepared_data[load_prepared_data.columns[-5]]
data.head()
```

|   | AATS0Z    | AATS0are | AATS0d   | AATS0dv  | AATS0i     | AATS0m    | AATS0p   | \ |
|---|-----------|----------|----------|----------|------------|-----------|----------|---|
| 0 | 25.090909 | 6.046518 | 3.109091 | 6.662626 | 160.775045 | 99.075564 | 1.555512 |   |
| 1 | 24.448276 | 6.008422 | 3.051724 | 6.386973 | 161.021674 | 96.473315 | 1.538471 |   |
| 2 | 23.868852 | 5.974074 | 3.000000 | 6.138434 | 161.244045 | 94.127025 | 1.523105 |   |
| 3 | 23.868852 | 5.974074 | 3.032787 | 6.171220 | 161.244045 | 94.127025 | 1.523105 |   |
| 4 | 23.343750 | 5.942945 | 2.953125 | 5.913194 | 161.445569 | 92.000700 | 1.509180 |   |

|   | AATS0pe  | AATS0s   | AATS0se  | ... | piPC10   | piPC2    | piPC3    | piPC4    | \ |
|---|----------|----------|----------|-----|----------|----------|----------|----------|---|
| 0 | 6.126680 | 3.435416 | 7.629859 | ... | 7.999655 | 4.266195 | 4.915408 | 5.516700 |   |

|   |          |          |          |     |          |          |          |          |
|---|----------|----------|----------|-----|----------|----------|----------|----------|
| 1 | 6.088791 | 3.330998 | 7.596891 | ... | 8.018726 | 4.280132 | 4.922714 | 5.520711 |
| 2 | 6.054630 | 3.236850 | 7.567166 | ... | 8.028799 | 4.293878 | 4.929967 | 5.524706 |
| 3 | 6.054630 | 3.257798 | 7.567166 | ... | 8.037440 | 4.307438 | 4.929967 | 5.524706 |
| 4 | 6.023670 | 3.151529 | 7.540228 | ... | 8.034892 | 4.307438 | 4.937168 | 5.528685 |

|   | piPC5    | piPC6    | piPC7    | piPC8    | piPC9    | A549     |
|---|----------|----------|----------|----------|----------|----------|
| 0 | 6.098566 | 6.595759 | 6.979116 | 7.337313 | 7.681445 | 7.966576 |
| 1 | 6.103048 | 6.601209 | 6.985613 | 7.349442 | 7.695531 | 7.935542 |
| 2 | 6.105281 | 6.603923 | 6.989306 | 7.353932 | 7.704023 | 7.962574 |
| 3 | 6.107510 | 6.606629 | 6.992068 | 7.361425 | 7.709420 | 7.978811 |
| 4 | 6.107510 | 6.605277 | 6.991148 | 7.356489 | 7.707175 | 7.048177 |

[5 rows x 1212 columns]

## 2 Multiple Linear regression (MLR)

```
[5]: without_standardization, train_r2_, test_r2_, hist1, hist2, target_column_name,
      ↪ training_data_RMSE, test_data_RMSE = pred_model.
      ↪ prepare_data_and_create_model(molecular_descriptors_df=data,
      ↪
      ↪ correlation_threshold=0.5,
      ↪
      ↪ standardization=False,
      ↪
      ↪ model_type='linear_model',
      ↪
      ↪ target_column_name = str(target),
      ↪
      ↪ random_state=random_state,
      ↪
      ↪ train_test_split_=True,
      ↪
      ↪ verbose=True)
```

I am not doing standardization...

|   | molecular descriptor name |            |
|---|---------------------------|------------|
| 0 | AATS0Z                    |            |
| 1 | AATS0are                  |            |
| 2 | AATS0d                    |            |
| 3 | AATS0dv                   |            |
| 4 | AATS0i                    |            |
|   | molecular descriptor name | corr_value |
| 0 | AATS0Z                    | -0.022797  |
| 1 | AATS0are                  | -0.139064  |
| 2 | AATS0d                    | 0.027592   |
| 3 | AATS0dv                   | -0.136049  |



|      |                           |            |                            |
|------|---------------------------|------------|----------------------------|
| 4    | AATSOi                    | 0.168958   |                            |
|      | molecular descriptor name | corr_value | absolute correlation value |
| 0    | AATSOZ                    | -0.022797  | 0.022797                   |
| 1    | AATSOare                  | -0.139064  | 0.139064                   |
| 2    | AATSOd                    | 0.027592   | 0.027592                   |
| 3    | AATSOdv                   | -0.136049  | 0.136049                   |
| 4    | AATSOi                    | 0.168958   | 0.168958                   |
|      | molecular descriptor name | corr_value | absolute correlation value |
| 226  | AMID_0                    | -0.557717  | 0.557717                   |
| 505  | EState_VSA5               | -0.534748  | 0.534748                   |
| 791  | MDEO-12                   | -0.555724  | 0.555724                   |
| 921  | SaasC                     | 0.513071   | 0.513071                   |
| 1091 | VSA_EState5               | 0.526082   | 0.526082                   |
|      | molecular descriptor name | corr_value | absolute correlation value |
| 226  | AMID_0                    | -0.557717  | 0.557717                   |
| 505  | EState_VSA5               | -0.534748  | 0.534748                   |
| 791  | MDEO-12                   | -0.555724  | 0.555724                   |
| 921  | SaasC                     | 0.513071   | 0.513071                   |
| 1091 | VSA_EState5               | 0.526082   | 0.526082                   |

The model used is: LinearReg..

Return the coefficient of determination of the prediction:

0.36959560986386164

R<sup>2</sup> score: 0.49290957430678395

Correlation coefficient: 0.7020751913483227

Test data - unseen during training:

R<sup>2</sup> score: 0.36959560986386164

Correlation coefficient: 0.607943755510213

[8.12901206 8.07870923 7.51604097 7.04078357 5.89815201 7.68595635  
7.96816567 7.80460535 7.64435354 7.87125241 7.84770827 6.77762909  
7.90563321 6.51297302 7.18652453 8.1847596 7.92634326 7.61620022]

44 8.193820  
47 7.886057  
4 7.048177  
55 7.886057  
26 4.904168  
64 8.537602  
73 7.657577  
10 8.017729  
40 7.920819  
107 8.698970  
18 6.994819  
62 8.886057  
11 7.962574  
36 6.221126  
89 8.022276  
91 8.958607  
109 7.886057  
0 7.966576

Name: A549, dtype: float64

Training Root Mean Square Error: 0.6708383867358984

Testing Root Mean Square Error: 0.7555148852130892

```
[6]: print(target_column_name+str('_transformed'))  
      print(hist1[target_column_name].hist())
```

A549\_transformed

AxesSubplot(0.125,0.11;0.775x0.77)

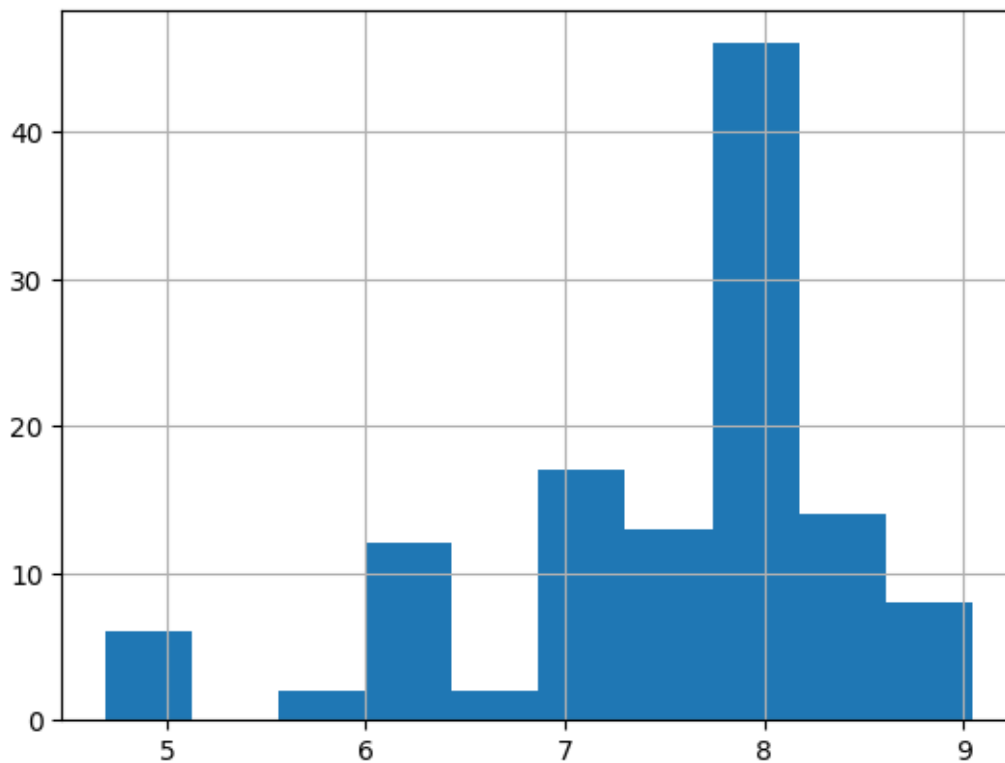

```
[7]: with_standardization, train_r2_, test_r2_, hist1, hist2, target_column_name,   
      ↪ training_data_RMSE, test_data_RMSE = pred_model.  
      ↪ prepare_data_and_create_model(molecular_descriptors_df=data,  
  
      ↪ correlation_threshold=0.50,  
  
      ↪ standardization=True,  
  
      ↪ model_type='linear_model',  
  
      ↪ target_column_name = target,
```

```

↪          random_state=random_state,
↪
↪          train_test_split_=True,
↪
↪          verbose=True)

```

I am doing standardization...

|   | molecular descriptor name |  |
|---|---------------------------|--|
| 0 | AATSOZ                    |  |
| 1 | AATSOare                  |  |
| 2 | AATSOd                    |  |
| 3 | AATSOdv                   |  |
| 4 | AATSOi                    |  |

  

|   | molecular descriptor name | corr_value |
|---|---------------------------|------------|
| 0 | AATSOZ                    | -0.022797  |
| 1 | AATSOare                  | -0.139064  |
| 2 | AATSOd                    | 0.027592   |
| 3 | AATSOdv                   | -0.136049  |
| 4 | AATSOi                    | 0.168958   |

  

|   | molecular descriptor name | corr_value | absolute correlation value |
|---|---------------------------|------------|----------------------------|
| 0 | AATSOZ                    | -0.022797  | 0.022797                   |
| 1 | AATSOare                  | -0.139064  | 0.139064                   |
| 2 | AATSOd                    | 0.027592   | 0.027592                   |
| 3 | AATSOdv                   | -0.136049  | 0.136049                   |
| 4 | AATSOi                    | 0.168958   | 0.168958                   |

  

|      | molecular descriptor name | corr_value | absolute correlation value |
|------|---------------------------|------------|----------------------------|
| 226  | AMID_0                    | -0.557717  | 0.557717                   |
| 505  | EState_VSA5               | -0.534748  | 0.534748                   |
| 791  | MDEO-12                   | -0.555724  | 0.555724                   |
| 921  | SaasC                     | 0.513071   | 0.513071                   |
| 1091 | VSA_EState5               | 0.526082   | 0.526082                   |

  

|      | molecular descriptor name | corr_value | absolute correlation value |
|------|---------------------------|------------|----------------------------|
| 226  | AMID_0                    | -0.557717  | 0.557717                   |
| 505  | EState_VSA5               | -0.534748  | 0.534748                   |
| 791  | MDEO-12                   | -0.555724  | 0.555724                   |
| 921  | SaasC                     | 0.513071   | 0.513071                   |
| 1091 | VSA_EState5               | 0.526082   | 0.526082                   |

The model used is: LinearReg..

Return the coefficient of determination of the prediction:

0.36959560986386164

R<sup>2</sup> score: 0.49290957430678395

Correlation coefficient: 0.7020751913483227

Test data - unseen during training:

R<sup>2</sup> score: 0.36959560986386164

Correlation coefficient: 0.607943755510213

[8.12901206 8.07870923 7.51604097 7.04078357 5.89815201 7.68595635

```

7.96816567 7.80460535 7.64435354 7.87125241 7.84770827 6.77762909
7.90563321 6.51297302 7.18652453 8.1847596 7.92634326 7.61620022]
44      8.193820
47      7.886057
4       7.048177
55      7.886057
26      4.904168
64      8.537602
73      7.657577
10      8.017729
40      7.920819
107     8.698970
18      6.994819
62      8.886057
11      7.962574
36      6.221126
89      8.022276
91      8.958607
109     7.886057
0       7.966576
Name: A549, dtype: float64
Training Root Mean Square Error: 0.6708383867358984
Testing Root Mean Square Error: 0.7555148852130892

```

## 2.1 Search inside correlation space

```

[8]: step = 0.01
initial_step = corr_low
last_step = corr_high
first_list = [x / 100.0 for x in range(int(initial_step*100),
↳int(last_step*100), int(step*100))]
second_list = []
third_list = []
fourth_l = []
fifth_l = []
f_list = []
for i in first_list:
    without_standardization, train_r2, test_r2, _, h_, target_column_name,
↳training_data_RMSE, test_data_RMSE = pred_model.
↳prepare_data_and_create_model(molecular_descriptors_df = data,

↳
correlation_threshold = i,

↳
standardization = False,

↳
model_type = 'linear_model',

```

```

    ↪          target_column_name = target,
    ↪          random_state=random_state,
    ↪          train_test_split_ = True,
    ↪          verbose = False)
second_list.append(train_r2)
third_list.append(test_r2)
fourth_l.append(training_data_RMSE)
fifth_l.append(test_data_RMSE)
f_list.append(len(h_))

```

```

[9]: df_without_standardization = pd.DataFrame(data=first_list,
    ↪columns=["Correlation threshold"])
df_without_standardization['Training data R^2 score'] = second_list
df_without_standardization['Test data R^2 score'] = third_list
df_without_standardization['Training RMSE'] = fourth_l
df_without_standardization['Test RMSE'] = fifth_l
df_without_standardization['Number of features'] = f_list

```

```

[10]: df_linear = df_without_standardization.copy()
df_without_standardization

```

```

[10]:
Correlation threshold  Training data R^2 score  Test data R^2 score  \
0                    0.33                    0.993044             -4.544410
1                    0.34                    0.964137             -6.199282
2                    0.35                    0.945689             -3.017881
3                    0.36                    0.934600             -3.136296
4                    0.37                    0.908123             -0.841790
5                    0.38                    0.865002              0.032270
6                    0.39                    0.778480              0.486171
7                    0.40                    0.676043              0.491690
8                    0.41                    0.673892              0.474498
9                    0.42                    0.649674              0.078386
10                   0.43                    0.637643              0.204582
11                   0.44                    0.613365              0.346221
12                   0.45                    0.613365              0.346221
13                   0.46                    0.590077              0.369409
14                   0.47                    0.574384              0.351006
15                   0.48                    0.524351              0.477630
16                   0.49                    0.497891              0.417097
17                   0.50                    0.492910              0.369596
18                   0.51                    0.492910              0.369596
19                   0.52                    0.490837              0.385044
20                   0.53                    0.454814              0.492363

```

|    | Training RMSE | Test RMSE | Number of features |
|----|---------------|-----------|--------------------|
| 0  | 0.078570      | 2.240583  | 94                 |
| 1  | 0.178402      | 2.553160  | 79                 |
| 2  | 0.219543      | 1.907357  | 73                 |
| 3  | 0.240914      | 1.935259  | 68                 |
| 4  | 0.285548      | 1.291378  | 57                 |
| 5  | 0.346130      | 0.936075  | 47                 |
| 6  | 0.443385      | 0.682092  | 39                 |
| 7  | 0.536190      | 0.678419  | 31                 |
| 8  | 0.537968      | 0.689796  | 27                 |
| 9  | 0.557585      | 0.913499  | 22                 |
| 10 | 0.567079      | 0.848655  | 18                 |
| 11 | 0.585769      | 0.769394  | 16                 |
| 12 | 0.585769      | 0.769394  | 16                 |
| 13 | 0.603151      | 0.755627  | 13                 |
| 14 | 0.614588      | 0.766573  | 11                 |
| 15 | 0.649709      | 0.687737  | 8                  |
| 16 | 0.667535      | 0.726494  | 7                  |
| 17 | 0.670838      | 0.755515  | 5                  |
| 18 | 0.670838      | 0.755515  | 5                  |
| 19 | 0.672208      | 0.746200  | 4                  |
| 20 | 0.695581      | 0.677969  | 3                  |

```
[ ]:
```

## 2.2 Plots

```
[11]: plt.plot(df_without_standardization['Correlation threshold'],
↳df_without_standardization['Training data R^2 score'], label = "Training_
↳data R^2 score", marker='v')
plt.plot(df_without_standardization['Correlation threshold'],
↳df_without_standardization['Test data R^2 score'], label = "Test data R^2_
↳score", marker='D')
plt.legend()
plt.xlabel('Correlation threshold')
plt.ylabel('R^2 score')
plt.ylim([0, 1])
plt.show()
```

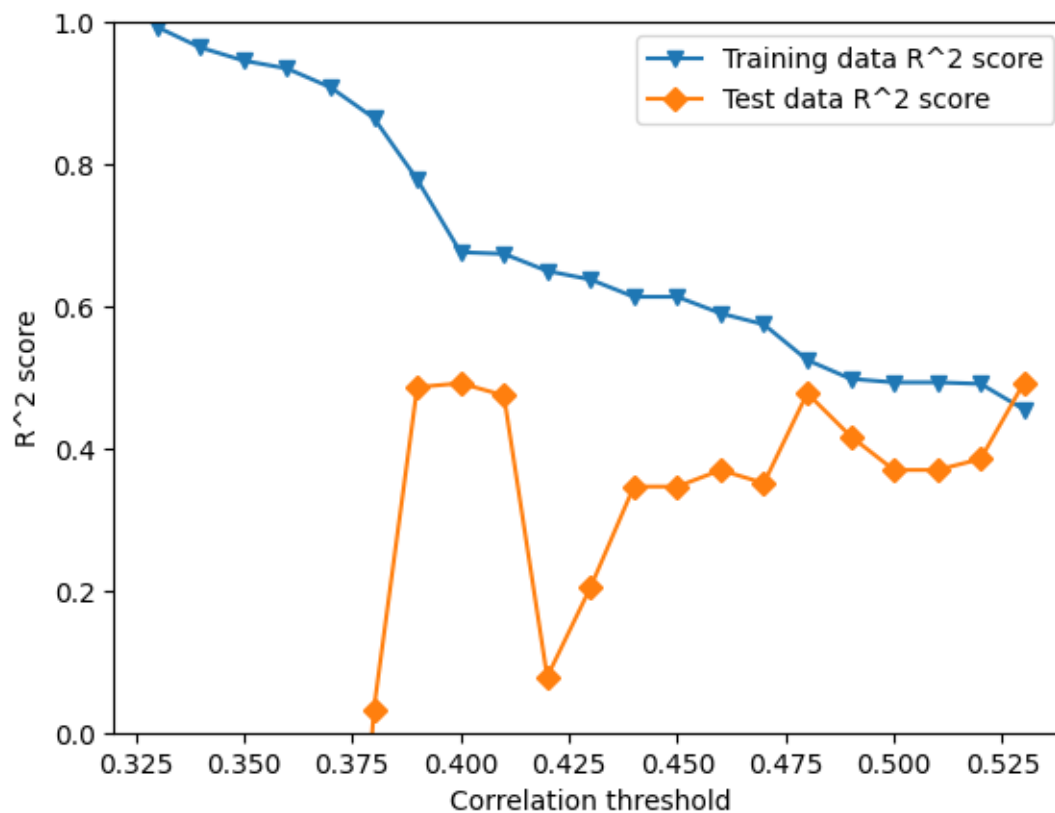

```
[12]: plt.plot(df_without_standardization['Correlation threshold'],  
             df_without_standardization['Number of features'], label = "Number of  
             features", marker='.')  
plt.legend()  
plt.xlabel('Correlation threshold')  
plt.ylabel('Number of features')  
plt.show()
```



[ ]:

## 2.3 Decision Tree

```
[13]: without_standardization, train_r2_, test_r2_, hist1, hist2, target_column_name,
      ↪ training_data_RMSE, test_data_RMSE = pred_model.
      ↪ prepare_data_and_create_model(molecular_descriptors_df=data,
      ↪
      ↪ correlation_threshold=0.50,
      ↪
      ↪ standardization=False,
      ↪
      ↪ model_type='DecisionTreeRegressor',
      ↪
      ↪ max_depth=5,
      ↪
      ↪ target_column_name = target,
      ↪
      ↪ random_state=random_state,
```



```

↪          train_test_split_=True,
↪          verbose=True)

```

I am not doing standardization...

```

molecular descriptor name
0          AATSOZ
1          AATSOare
2          AATSOd
3          AATSOdv
4          AATSOi
molecular descriptor name  corr_value
0          AATSOZ      -0.022797
1          AATSOare    -0.139064
2          AATSOd       0.027592
3          AATSOdv     -0.136049
4          AATSOi       0.168958
molecular descriptor name  corr_value  absolute correlation value
0          AATSOZ      -0.022797          0.022797
1          AATSOare    -0.139064          0.139064
2          AATSOd       0.027592          0.027592
3          AATSOdv     -0.136049          0.136049
4          AATSOi       0.168958          0.168958
molecular descriptor name  corr_value  absolute correlation value
226          AMID_0      -0.557717          0.557717
505          EState_VSA5 -0.534748          0.534748
791          MDEO-12     -0.555724          0.555724
921          SaasC       0.513071          0.513071
1091         VSA_EState5  0.526082          0.526082
molecular descriptor name  corr_value  absolute correlation value
226          AMID_0      -0.557717          0.557717
505          EState_VSA5 -0.534748          0.534748
791          MDEO-12     -0.555724          0.555724
921          SaasC       0.513071          0.513071
1091         VSA_EState5  0.526082          0.526082

```

The model used is: DecisionTree...

Return the coefficient of determination of the prediction:

0.45678797553100636

R<sup>2</sup> score: 0.9212015338337038

Correlation coefficient: 0.959792443100957

Test data - unseen during training:

R<sup>2</sup> score: 0.45678797553100636

Correlation coefficient: 0.6758609143388944

```

[7.63701524 7.93527443 7.93527443 7.79224678 6.12412387 8.1812164
 7.93527443 7.93527443 7.93527443 7.93527443 7.14451502 7.79224678
 7.93527443 6.0389332 7.06550155 7.14451502 7.93527443 7.93527443]

```

44 8.193820

```
47    7.886057
4     7.048177
55    7.886057
26    4.904168
64    8.537602
73    7.657577
10    8.017729
40    7.920819
107   8.698970
18    6.994819
62    8.886057
11    7.962574
36    6.221126
89    8.022276
91    8.958607
109   7.886057
0     7.966576
```

Name: A549, dtype: float64

Training Root Mean Square Error: 0.2644442220792924

Testing Root Mean Square Error: 0.7013230263965958

```
[14]: print(target_column_name+str('_transformed'))
      print(hist1[target_column_name].hist())
```

A549\_transformed

AxesSubplot(0.125,0.11;0.775x0.77)



```
[15]: with_standardization, train_r2_, test_r2_, hist1, hist2, target_column_name,
      ↪ training_data_RMSE, test_data_RMSE = pred_model.
      ↪ prepare_data_and_create_model(molecular_descriptors_df=data,
      ↪
      ↪         correlation_threshold=0.50,
      ↪
      ↪         standardization=True,
      ↪
      ↪         model_type='DecisionTreeRegressor',
      ↪
      ↪         max_depth=5,
      ↪
      ↪         target_column_name = target,
      ↪
      ↪         random_state=random_state,
      ↪
      ↪         train_test_split_=True,
      ↪
      ↪         verbose=True)
```

I am doing standardization...  
molecular descriptor name

|      |                           |            |                            |
|------|---------------------------|------------|----------------------------|
| 0    | AATSOZ                    |            |                            |
| 1    | AATSOare                  |            |                            |
| 2    | AATSOd                    |            |                            |
| 3    | AATSOdv                   |            |                            |
| 4    | AATSOi                    |            |                            |
|      | molecular descriptor name | corr_value |                            |
| 0    | AATSOZ                    | -0.022797  |                            |
| 1    | AATSOare                  | -0.139064  |                            |
| 2    | AATSOd                    | 0.027592   |                            |
| 3    | AATSOdv                   | -0.136049  |                            |
| 4    | AATSOi                    | 0.168958   |                            |
|      | molecular descriptor name | corr_value | absolute correlation value |
| 0    | AATSOZ                    | -0.022797  | 0.022797                   |
| 1    | AATSOare                  | -0.139064  | 0.139064                   |
| 2    | AATSOd                    | 0.027592   | 0.027592                   |
| 3    | AATSOdv                   | -0.136049  | 0.136049                   |
| 4    | AATSOi                    | 0.168958   | 0.168958                   |
|      | molecular descriptor name | corr_value | absolute correlation value |
| 226  | AMID_0                    | -0.557717  | 0.557717                   |
| 505  | EState_VSA5               | -0.534748  | 0.534748                   |
| 791  | MDEO-12                   | -0.555724  | 0.555724                   |
| 921  | SaasC                     | 0.513071   | 0.513071                   |
| 1091 | VSA_EState5               | 0.526082   | 0.526082                   |
|      | molecular descriptor name | corr_value | absolute correlation value |
| 226  | AMID_0                    | -0.557717  | 0.557717                   |
| 505  | EState_VSA5               | -0.534748  | 0.534748                   |
| 791  | MDEO-12                   | -0.555724  | 0.555724                   |
| 921  | SaasC                     | 0.513071   | 0.513071                   |
| 1091 | VSA_EState5               | 0.526082   | 0.526082                   |

The model used is: DecisionTree...

Return the coefficient of determination of the prediction:  
0.45678797553100636

R<sup>2</sup> score: 0.9212015338337038

Correlation coefficient: 0.959792443100957

Test data - unseen during training:  
R<sup>2</sup> score: 0.45678797553100636

Correlation coefficient: 0.6758609143388944

[7.63701524 7.93527443 7.93527443 7.79224678 6.12412387 8.1812164  
7.93527443 7.93527443 7.93527443 7.93527443 7.14451502 7.79224678  
7.93527443 6.0389332 7.06550155 7.14451502 7.93527443 7.93527443]  
44 8.193820  
47 7.886057  
4 7.048177  
55 7.886057  
26 4.904168  
64 8.537602  
73 7.657577  
10 8.017729

```

40      7.920819
107     8.698970
18      6.994819
62      8.886057
11      7.962574
36      6.221126
89      8.022276
91      8.958607
109     7.886057
0       7.966576

```

Name: A549, dtype: float64

Training Root Mean Square Error: 0.2644442220792924

Testing Root Mean Square Error: 0.7013230263965958

## 2.4 Search inside correlation space

```

[16]: step = 0.01
      initial_step = corr_low
      last_step = corr_high
      first_list = [x / 100.0 for x in range(int(initial_step*100),
      ↪int(last_step*100), int(step*100))]
      max_depth = [range(2, 30, 1)]
      corr_th = []
      second_list = []
      third_list = []
      fourth_l = []
      fifth_l = []
      f_list = []
      fif_list = []
      for i in first_list:
          for depth in max_depth[0]:

              without_standardization, train_r2, test_r2, _, h_, target_column_name,
              ↪training_data_RMSE, test_data_RMSE = pred_model.
              ↪prepare_data_and_create_model(molecular_descriptors_df=data,

              ↪correlation_threshold=i,

              ↪standardization=False,

              ↪model_type='DecisionTreeRegressor',

              ↪max_depth=depth,

              ↪target_column_name = target,

              ↪random_state=random_state,

```

```

↪          train_test_split_=True,
↪          verbose=False)
    corr_th.append(i)
    second_list.append(train_r2)
    third_list.append(test_r2)
    fourth_l.append(training_data_RMSE)
    fifth_l.append(test_data_RMSE)
    f_list.append(len(h_))
    fif_list.append(depth)

```

```

[17]: df_without_standardization = pd.DataFrame(data=corr_th, columns=["Correlation_
↪threshold"])
df_without_standardization['Training data R^2 score'] = second_list
df_without_standardization['Test data R^2 score'] = third_list
df_without_standardization['Training RMSE'] = fourth_l
df_without_standardization['Test RMSE'] = fifth_l
df_without_standardization['Number of features'] = f_list
df_without_standardization['Depth number'] = fif_list

```

```

[18]: df_decision_tree = df_without_standardization.copy()
      #df_without_standardization.to_excel('../Data/
      ↪A549_Decision_tree_rs_'+str(random_state)+'.xlsx')

```

## 2.5 Plots

```
[19]: corre_list = [x / 100.0 for x in range(int(initial_step*100),
    ↪int(last_step*100), int(0.01*100))]
for element in corre_list:
    element_ =
    ↪df_without_standardization[df_without_standardization['Correlation_
    ↪threshold'] == float(element)]
    plt.plot(element_['Depth number'], element_['Training data R^2 score'],
    ↪label = "Training data R^2 score", marker='v')
    plt.plot(element_['Depth number'], element_['Test data R^2 score'], label =
    ↪"Test data R^2 score", marker='D')
    plt.legend()
    plt.xlabel('Depth number -> correlation threshold: '+str(element)+'\n
    ↪Number of features: '+str(element_['Number of features'].iloc[0]),
    ↪fontweight='bold')
    plt.xlim(max(element_['Depth number'])+1, min(element_['Depth number'])-1)
    plt.ylabel('R^2 score')
    plt.ylim([0, 1])
    plt.rc('grid', linestyle="-. ", color='black')
    plt.grid(True)
    plt.show()
```

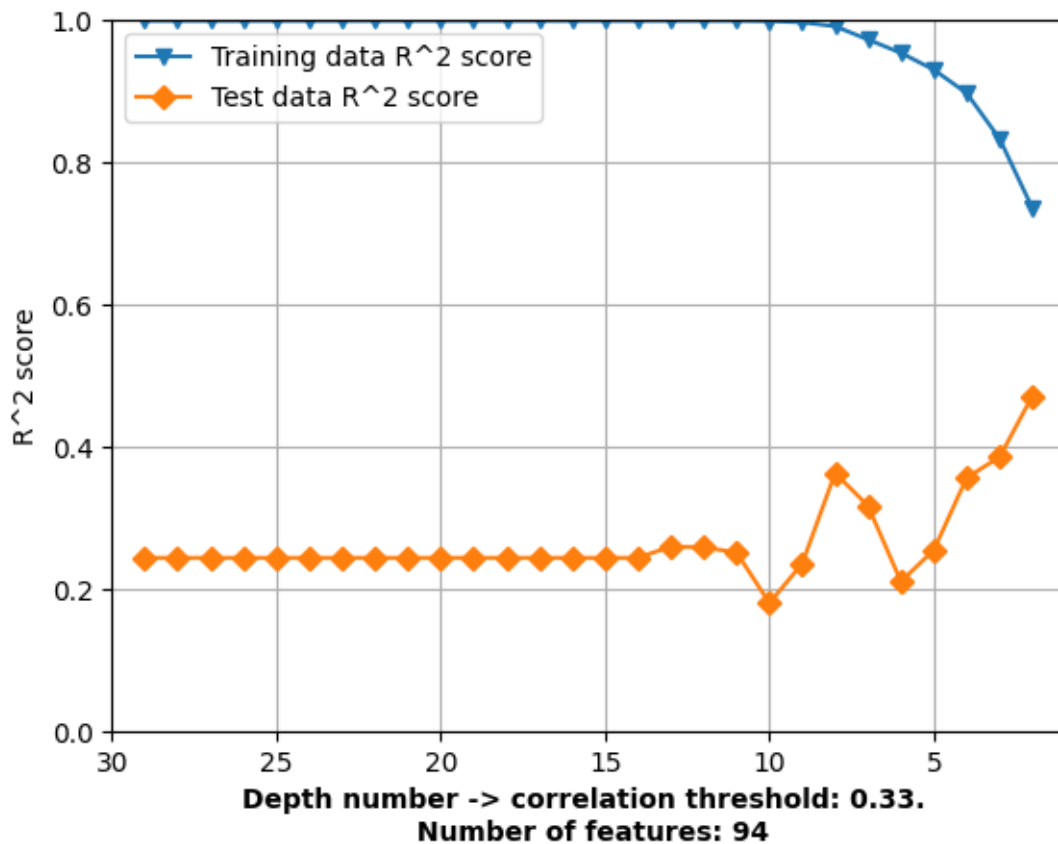

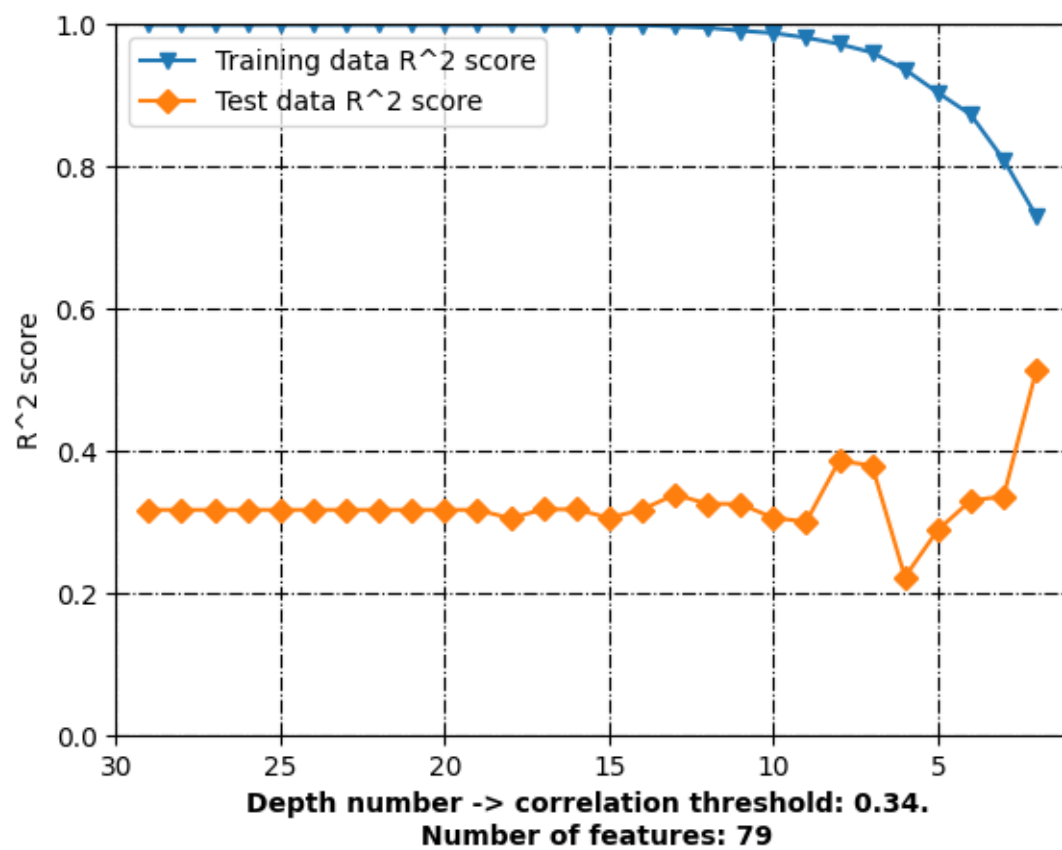



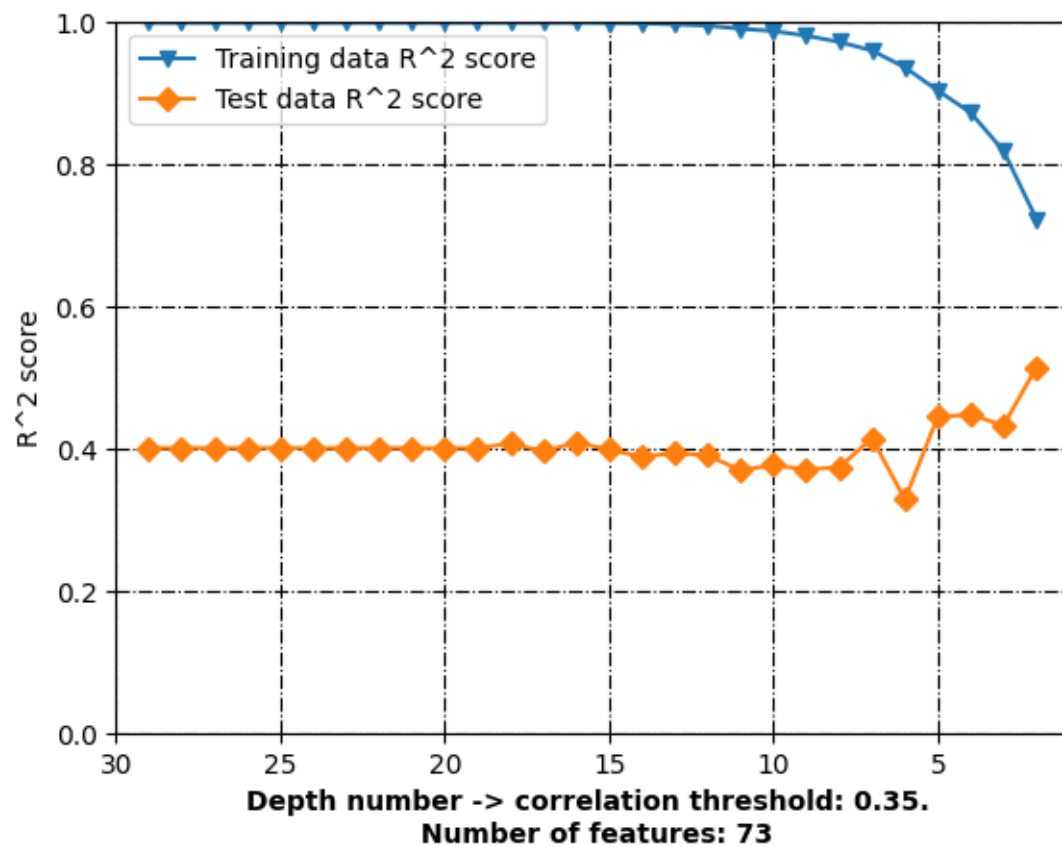

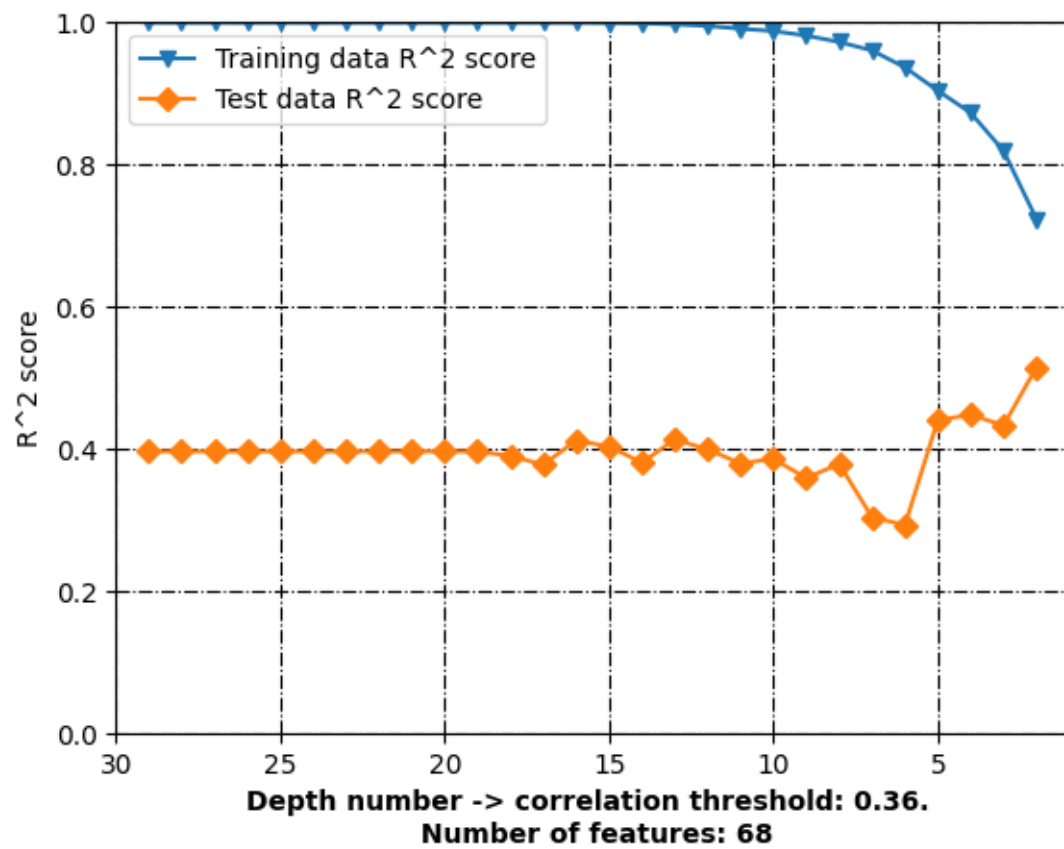

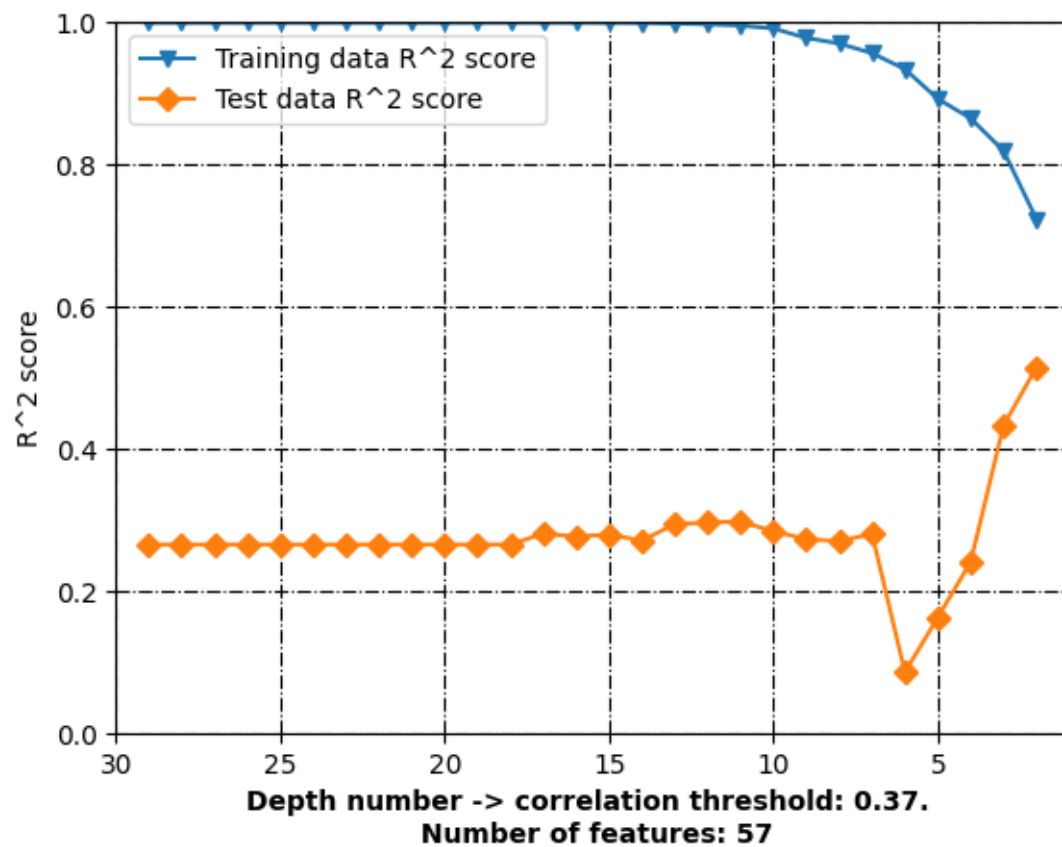

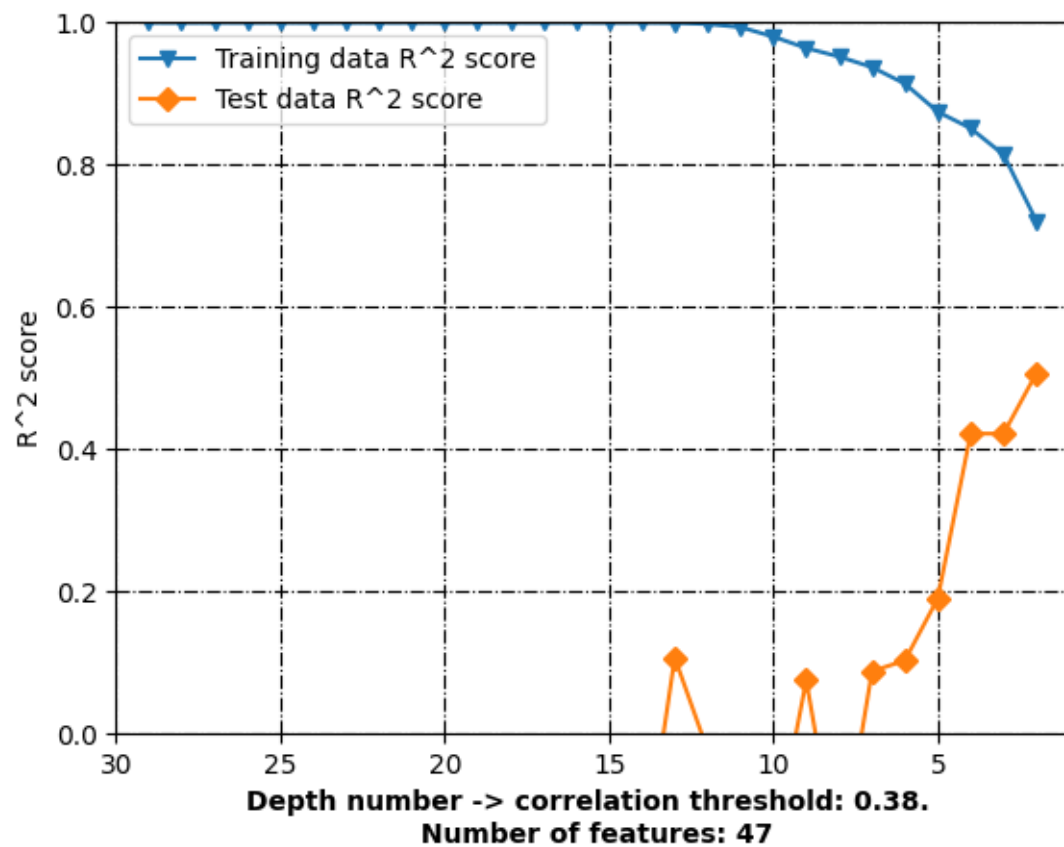

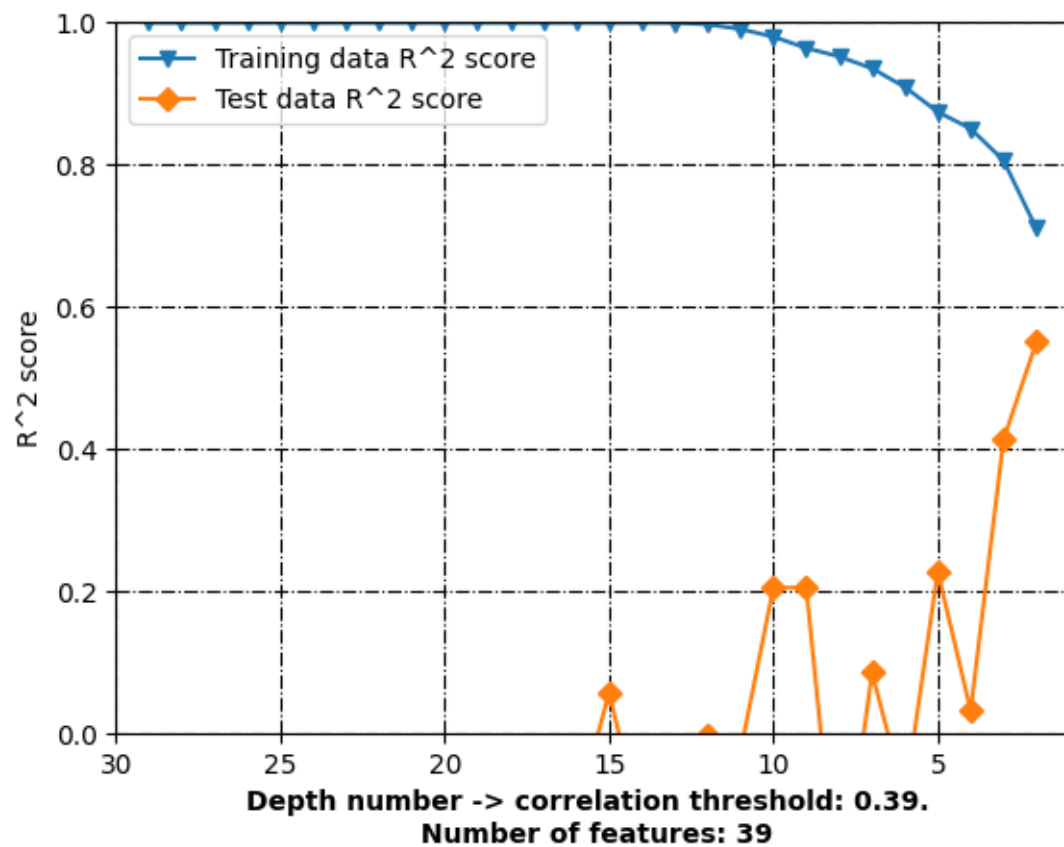

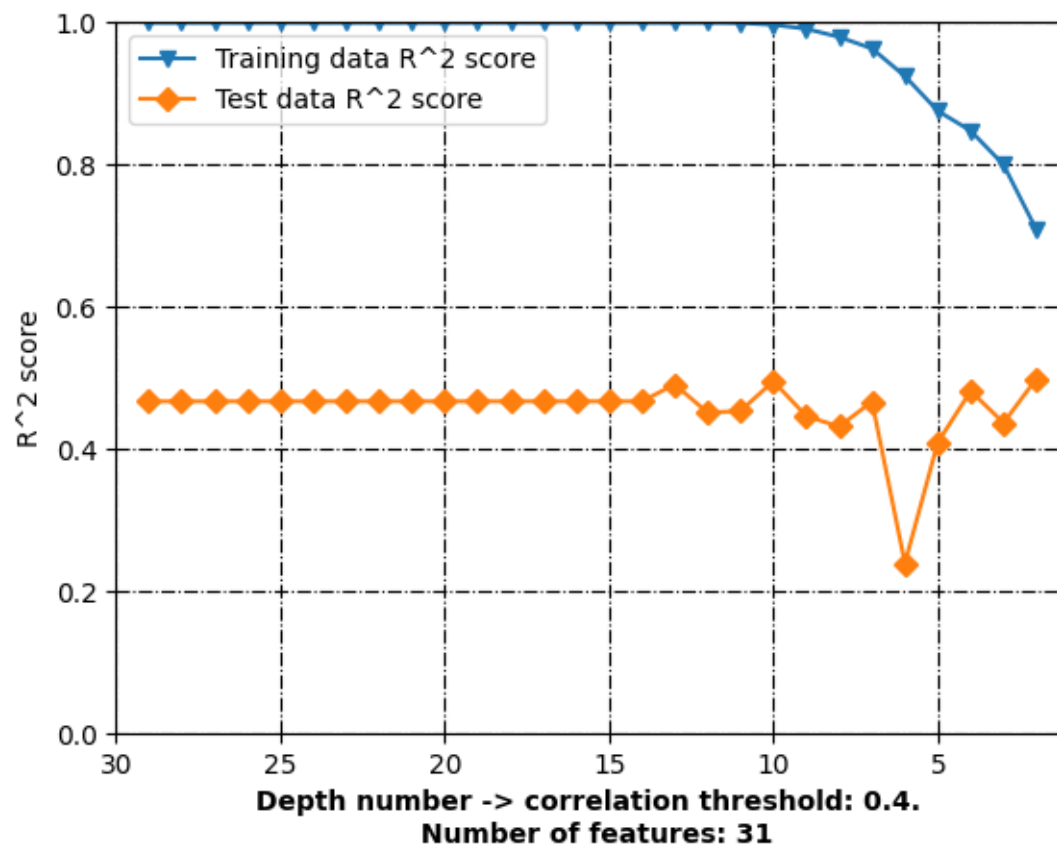

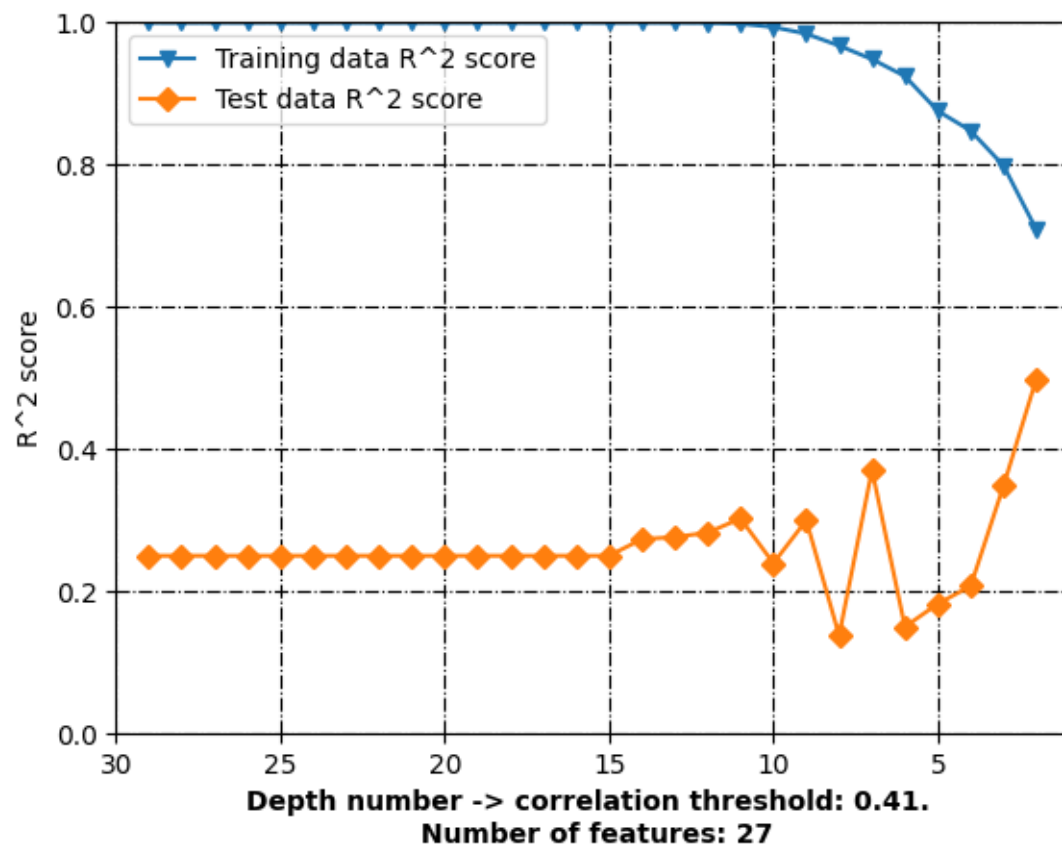

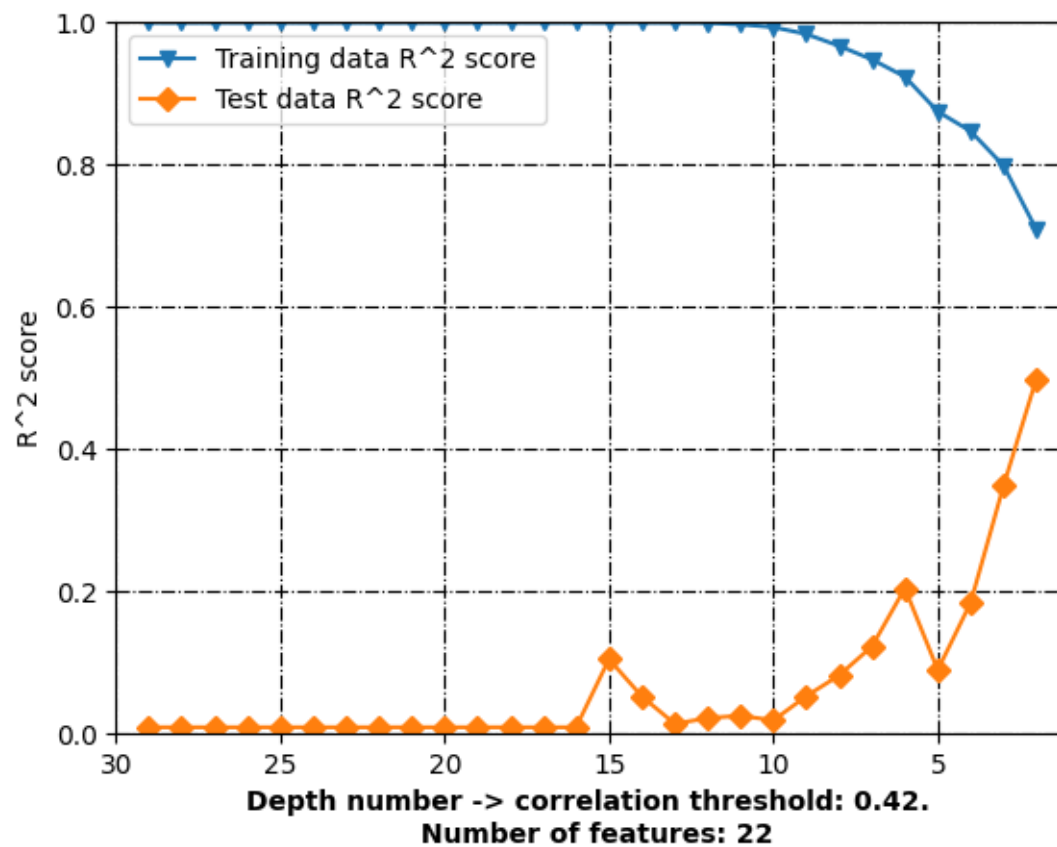



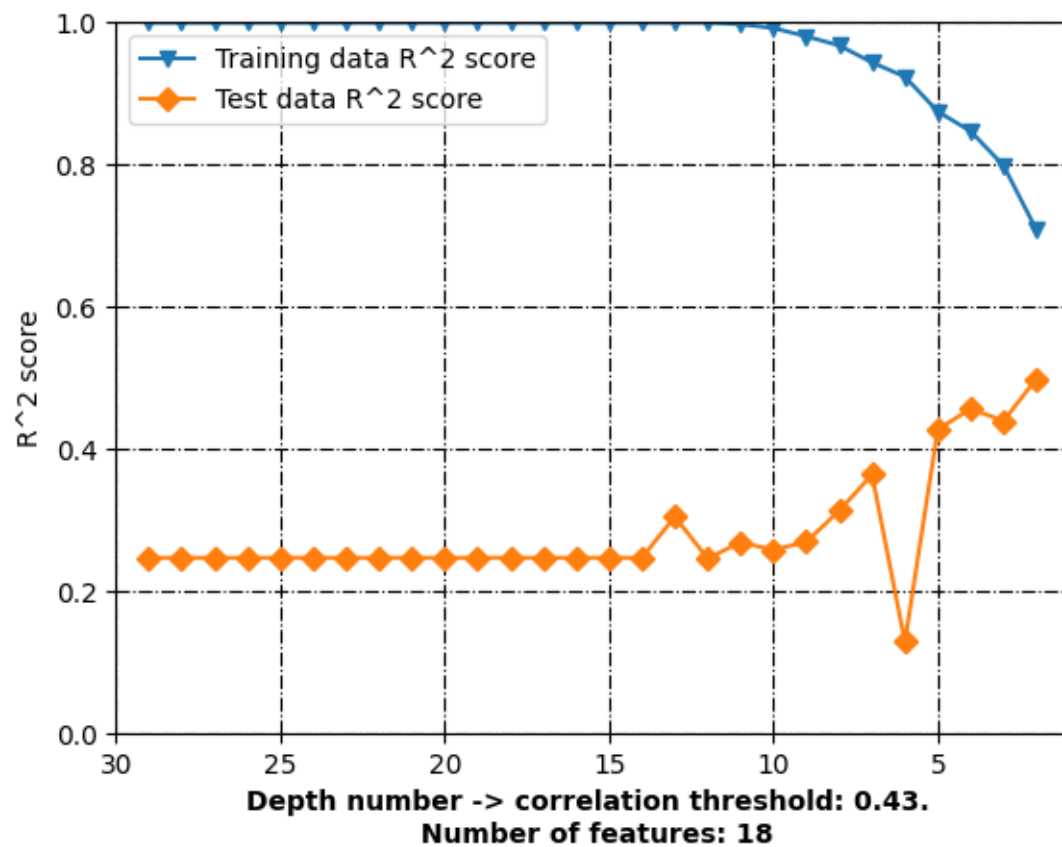

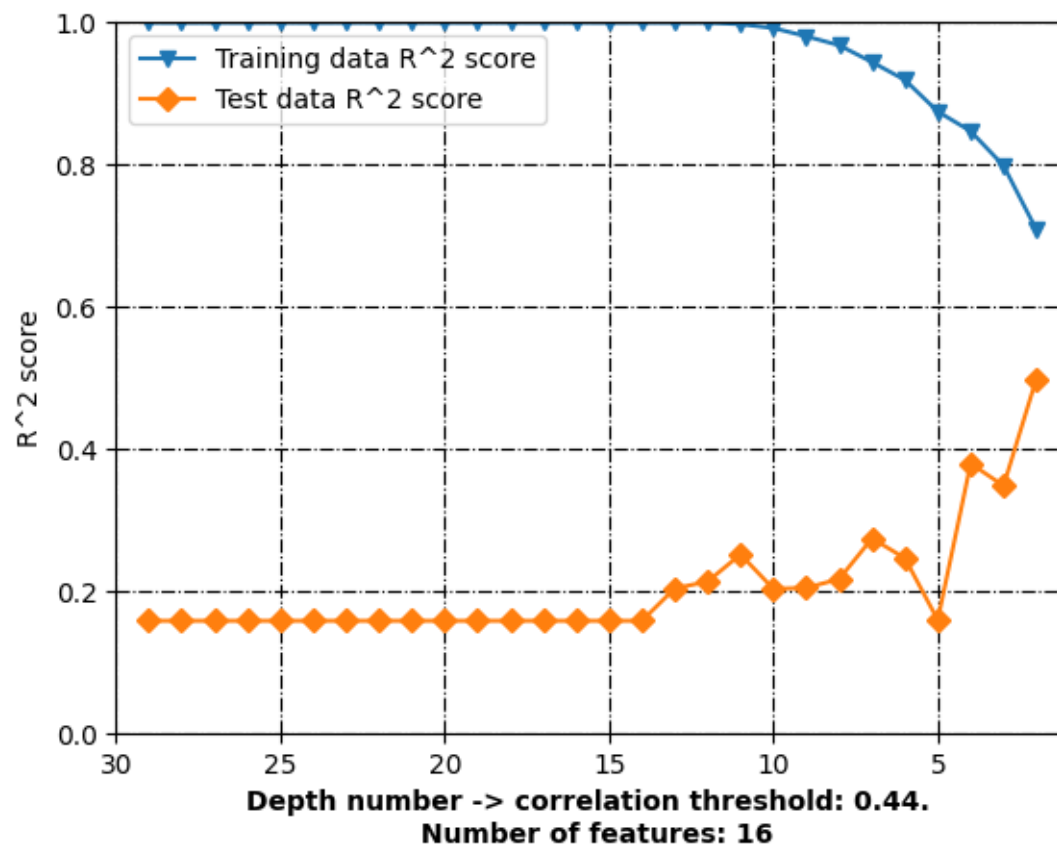

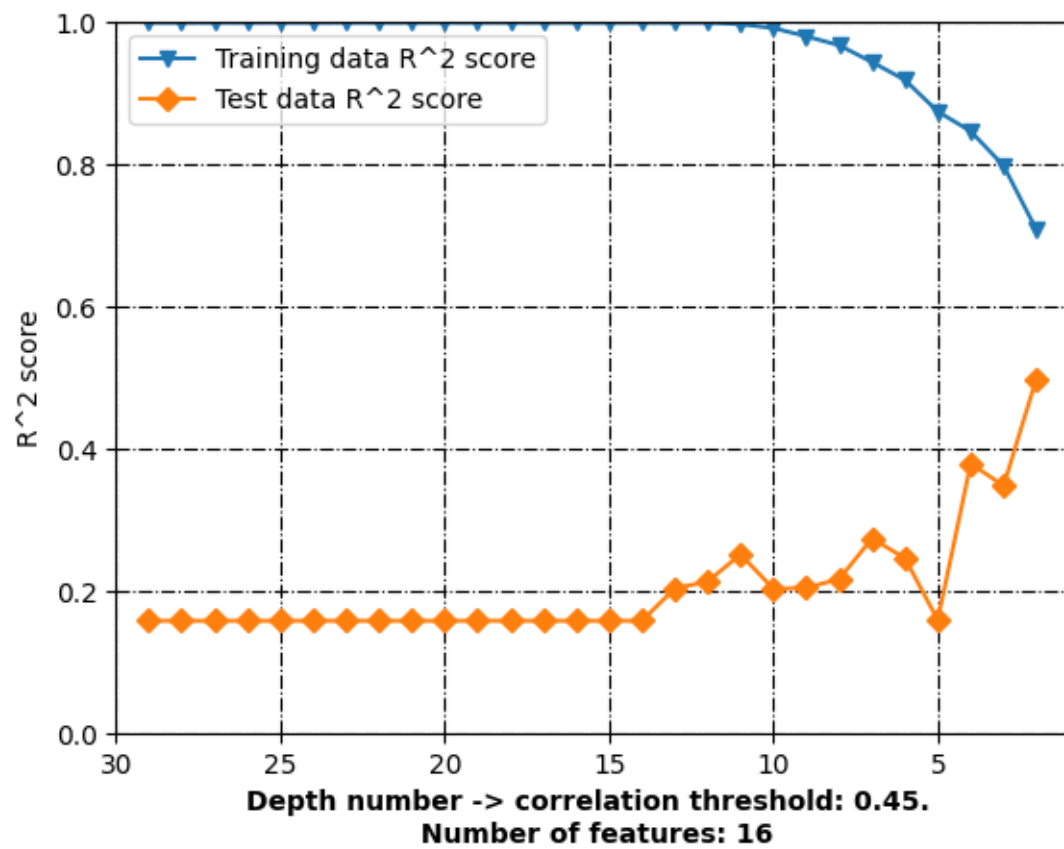

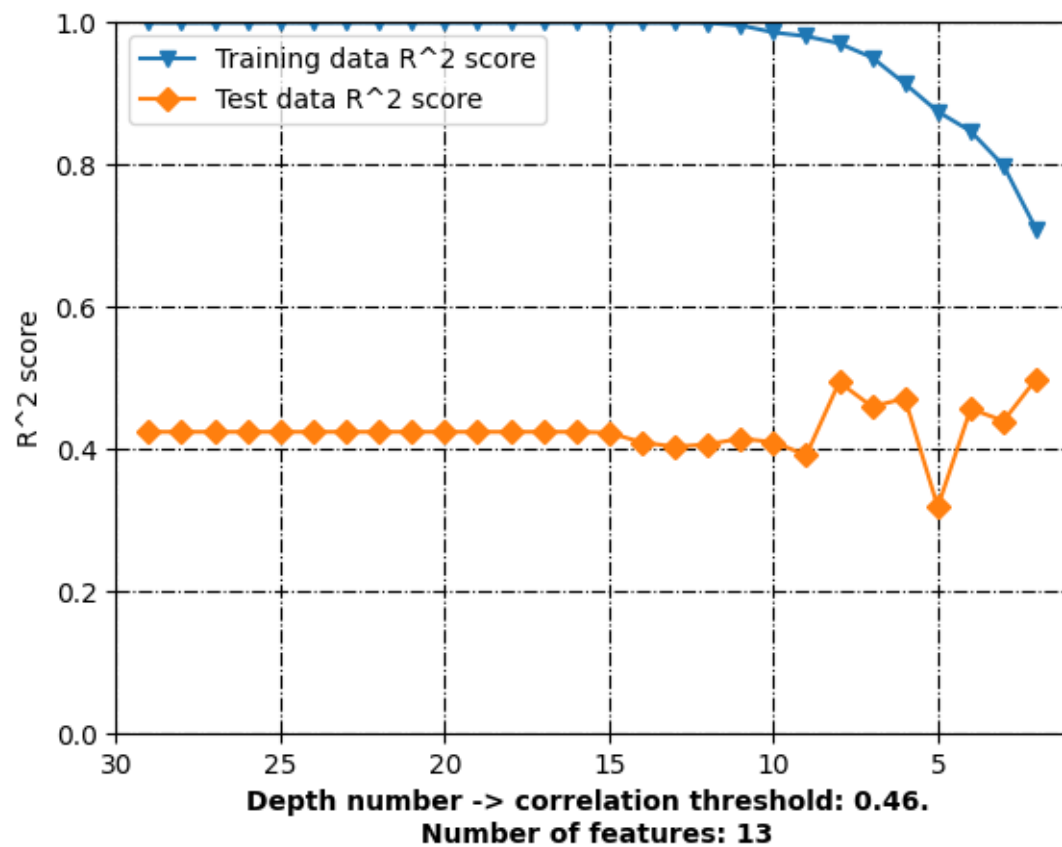

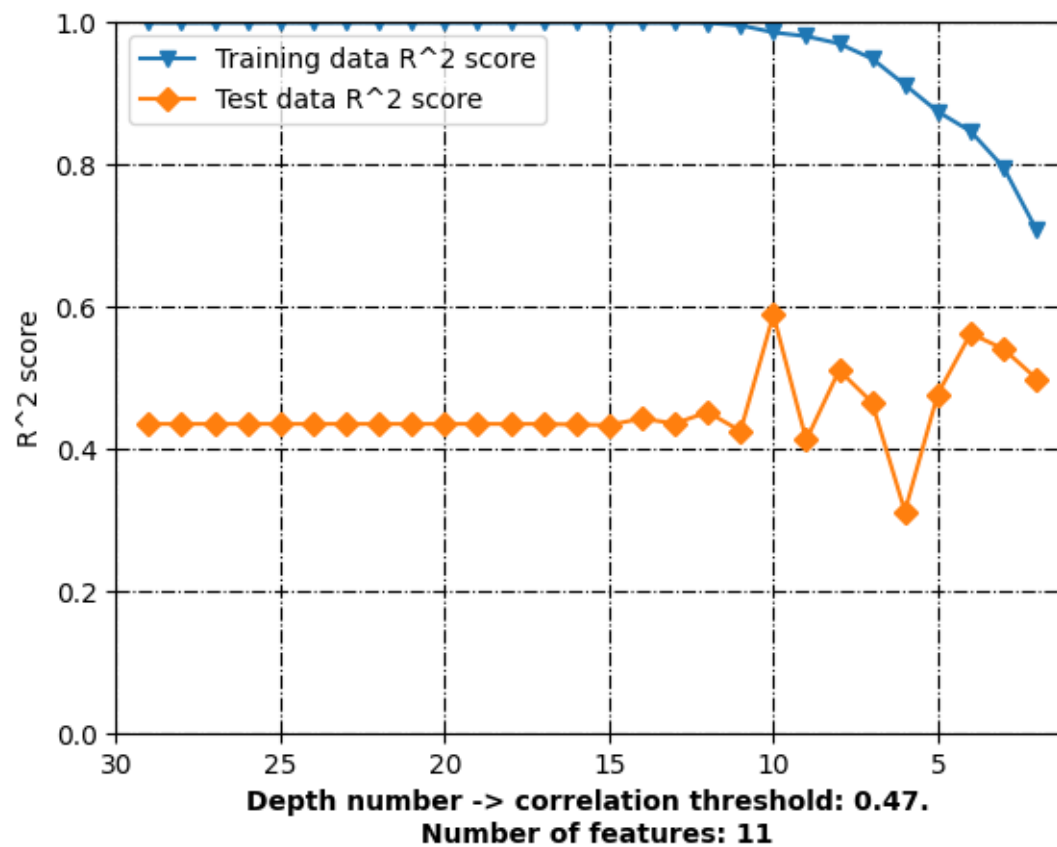

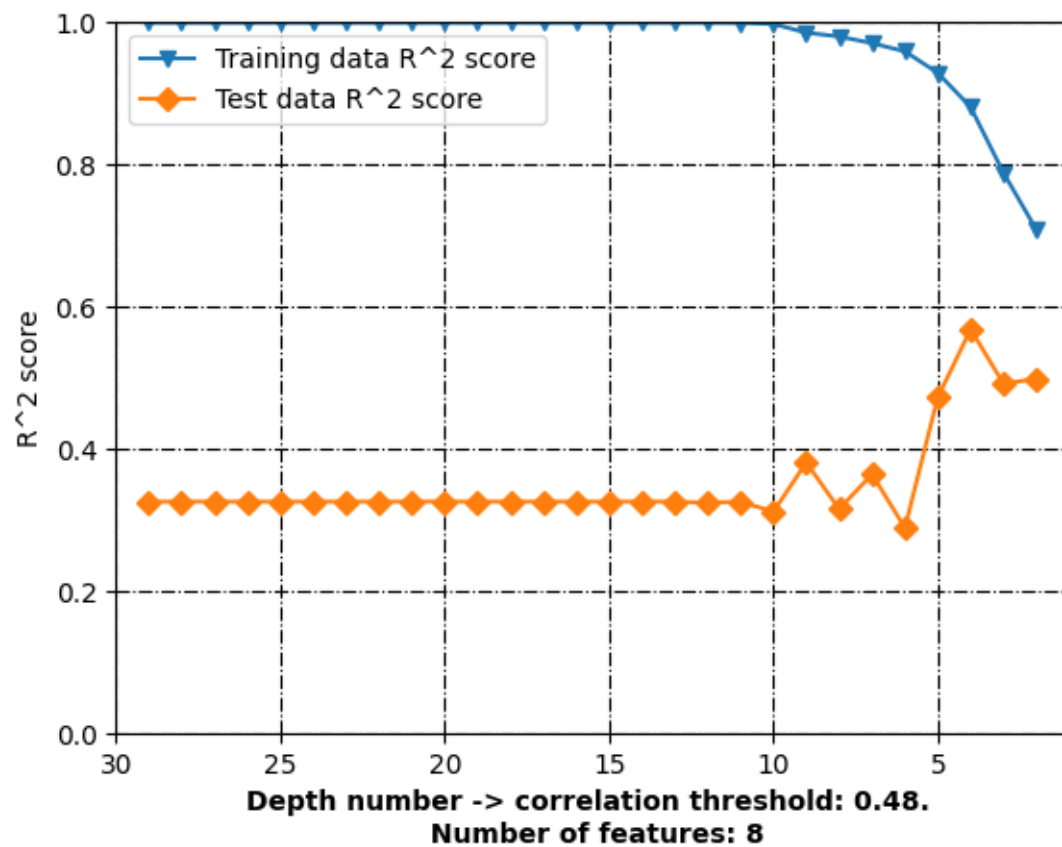

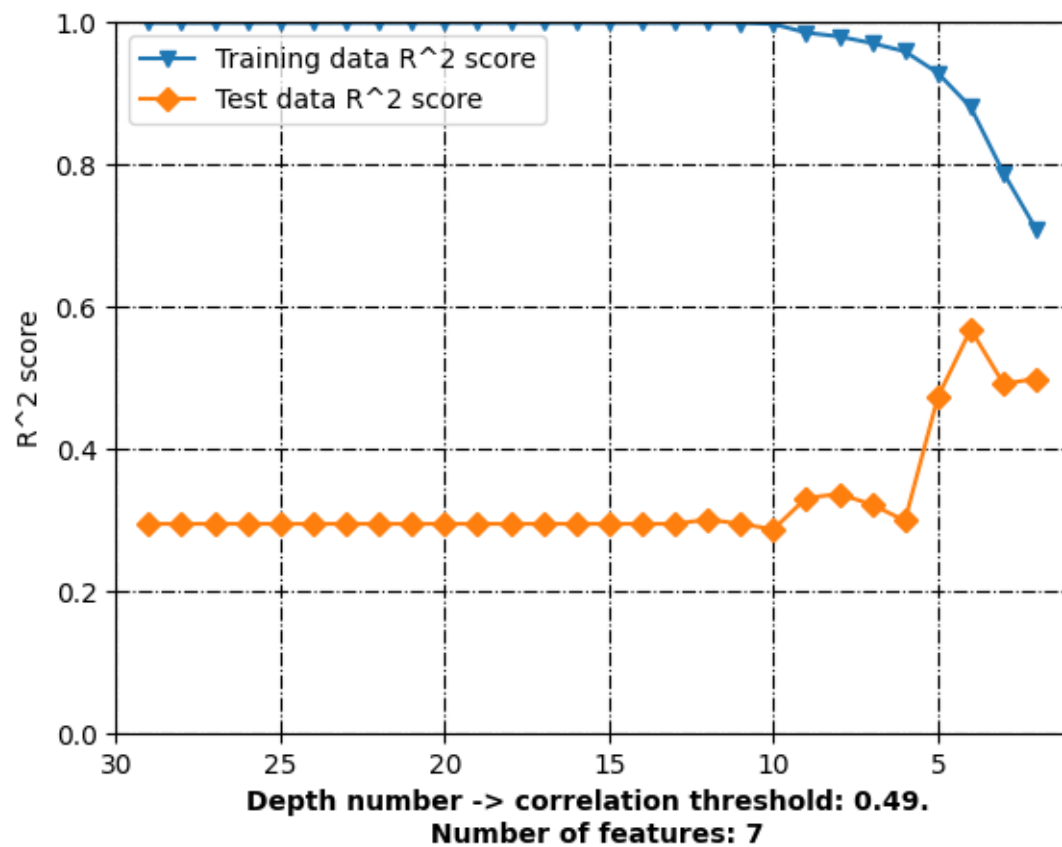

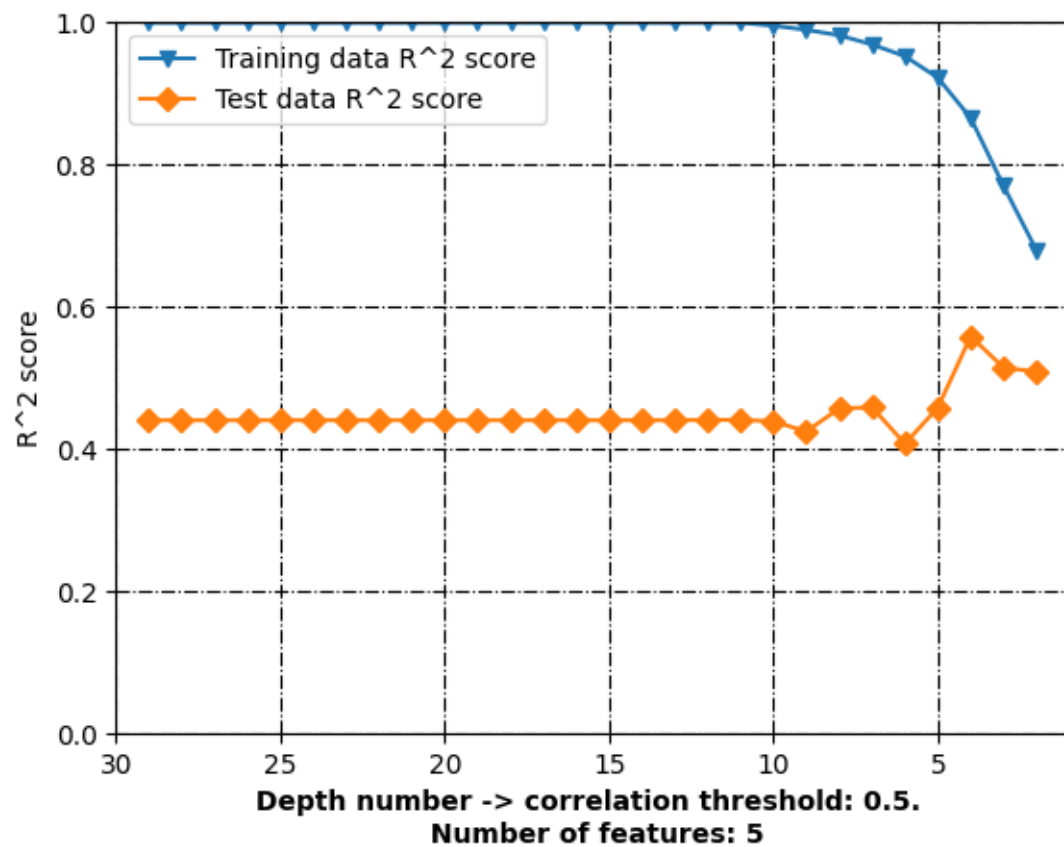



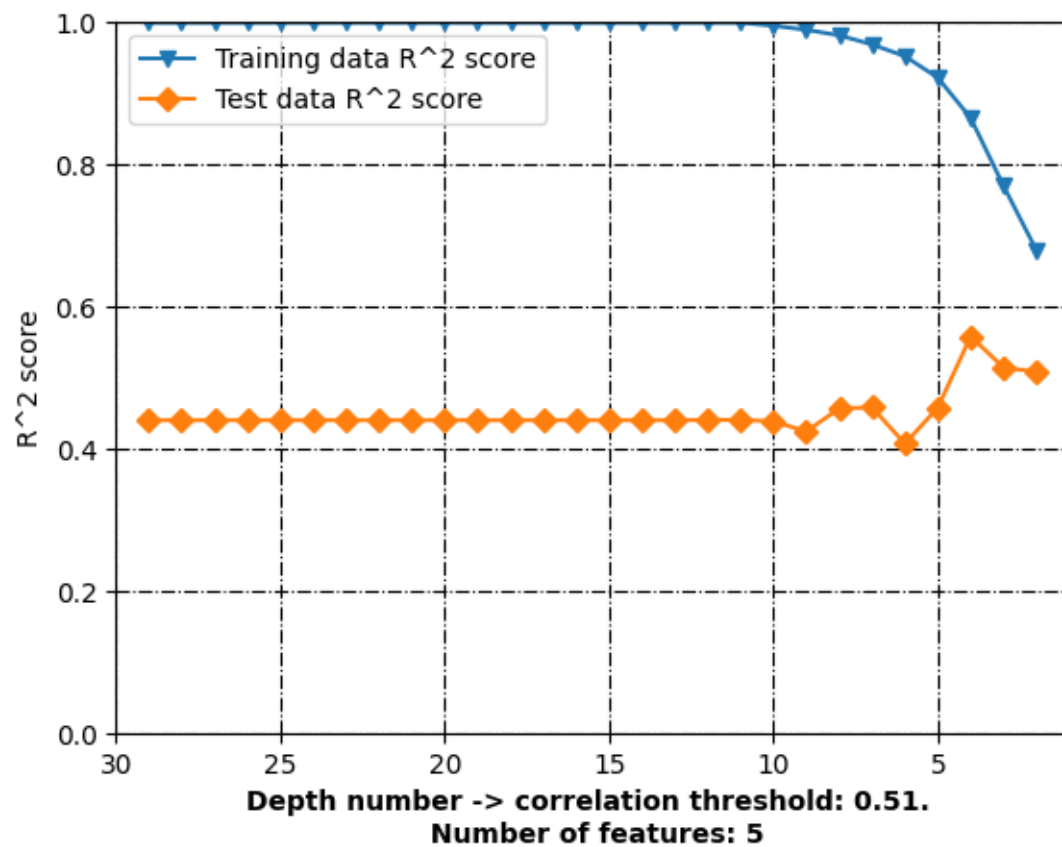

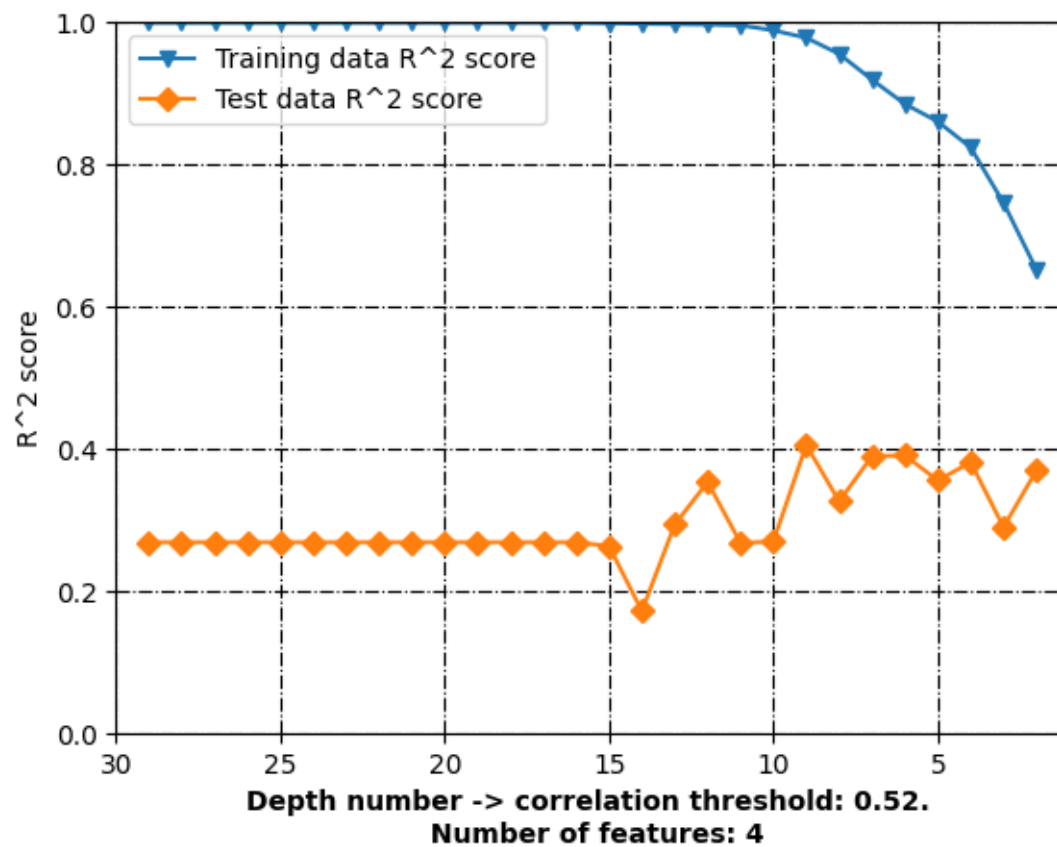

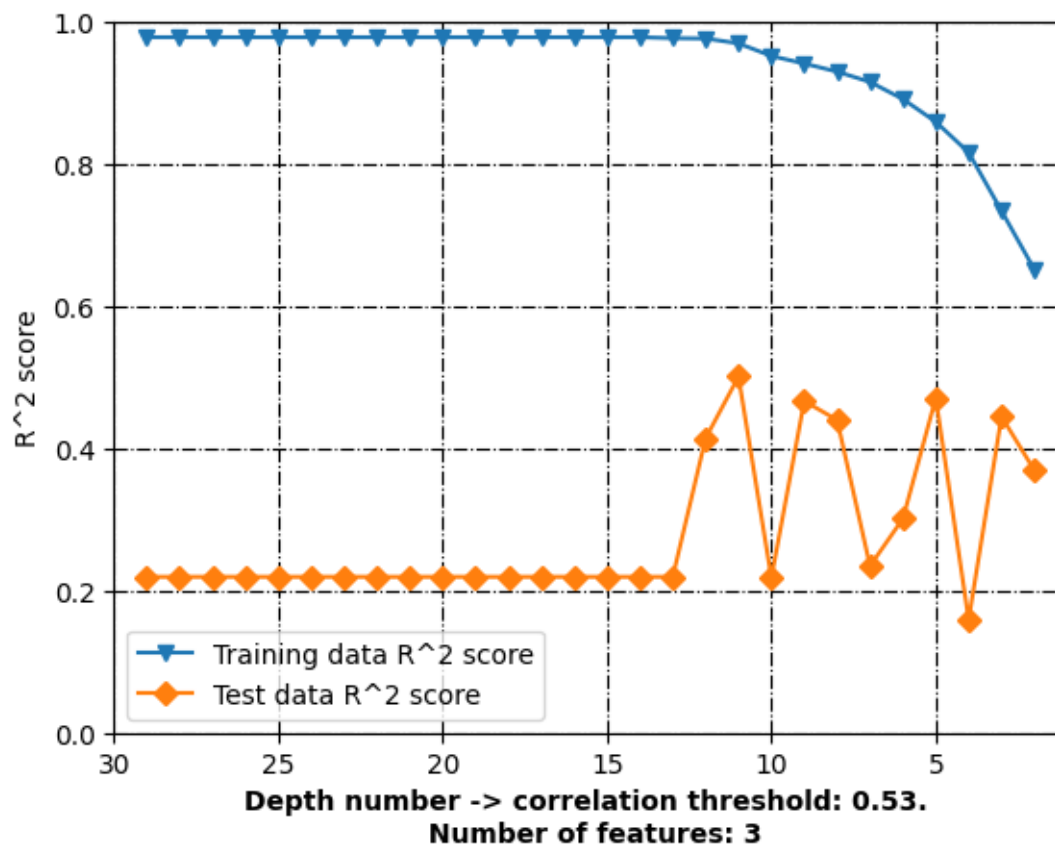

```
[20]: plt.plot(df_without_standardization['Correlation threshold'],  
             df_without_standardization['Number of features'], label = "Number of  
             features", marker='.')  
plt.legend()  
plt.xlabel('Correlation threshold')  
plt.ylabel('Number of features')  
plt.show()
```



[ ]:

### 3 Random Forest

```
[21]: without_standardization, train_r2_, test_r2_, hist1, hist2, target_column_name,
      ↪ training_data_RMSE, test_data_RMSE = pred_model.
      ↪ prepare_data_and_create_model(molecular_descriptors_df=data,
      ↪
      ↪     correlation_threshold=0.50,
      ↪
      ↪     standardization=False,
      ↪
      ↪     model_type='RandomForestRegressor',
      ↪
      ↪     n_estimators=12,
      ↪
      ↪     target_column_name = target,
      ↪
      ↪     random_state=random_state,
```

```

↪          train_test_split_=True,
↪          verbose=True)

```

I am not doing standardization...

|   | molecular descriptor name |  |  |
|---|---------------------------|--|--|
| 0 | AATSOZ                    |  |  |
| 1 | AATSOare                  |  |  |
| 2 | AATSOd                    |  |  |
| 3 | AATSOdv                   |  |  |
| 4 | AATSOi                    |  |  |

  

|   | molecular descriptor name | corr_value |  |
|---|---------------------------|------------|--|
| 0 | AATSOZ                    | -0.022797  |  |
| 1 | AATSOare                  | -0.139064  |  |
| 2 | AATSOd                    | 0.027592   |  |
| 3 | AATSOdv                   | -0.136049  |  |
| 4 | AATSOi                    | 0.168958   |  |

  

|   | molecular descriptor name | corr_value | absolute correlation value |
|---|---------------------------|------------|----------------------------|
| 0 | AATSOZ                    | -0.022797  | 0.022797                   |
| 1 | AATSOare                  | -0.139064  | 0.139064                   |
| 2 | AATSOd                    | 0.027592   | 0.027592                   |
| 3 | AATSOdv                   | -0.136049  | 0.136049                   |
| 4 | AATSOi                    | 0.168958   | 0.168958                   |

  

|      | molecular descriptor name | corr_value | absolute correlation value |
|------|---------------------------|------------|----------------------------|
| 226  | AMID_0                    | -0.557717  | 0.557717                   |
| 505  | EState_VSA5               | -0.534748  | 0.534748                   |
| 791  | MDEO-12                   | -0.555724  | 0.555724                   |
| 921  | SaasC                     | 0.513071   | 0.513071                   |
| 1091 | VSA_EState5               | 0.526082   | 0.526082                   |

  

|      | molecular descriptor name | corr_value | absolute correlation value |
|------|---------------------------|------------|----------------------------|
| 226  | AMID_0                    | -0.557717  | 0.557717                   |
| 505  | EState_VSA5               | -0.534748  | 0.534748                   |
| 791  | MDEO-12                   | -0.555724  | 0.555724                   |
| 921  | SaasC                     | 0.513071   | 0.513071                   |
| 1091 | VSA_EState5               | 0.526082   | 0.526082                   |

The model used is: RandomForest...

Return the coefficient of determination of the prediction:

0.5069352440802066

R<sup>2</sup> score: 0.9240354875228499

Correlation coefficient: 0.9612676461438042

Test data - unseen during training:

R<sup>2</sup> score: 0.5069352440802066

Correlation coefficient: 0.7119938511533696

[7.65137153 7.77327392 7.88934768 7.59369964 5.14608638 8.06568435  
7.93091305 7.87863225 8.06905679 8.04785191 7.2680587 7.62927442  
8.07574813 6.15268454 6.68421748 7.33463177 7.98931088 7.89716909]

44 8.193820

```
47    7.886057
4     7.048177
55    7.886057
26    4.904168
64    8.537602
73    7.657577
10    8.017729
40    7.920819
107   8.698970
18    6.994819
62    8.886057
11    7.962574
36    6.221126
89    8.022276
91    8.958607
109   7.886057
0     7.966576
```

Name: A549, dtype: float64

Training Root Mean Square Error: 0.2596453671959053

Testing Root Mean Square Error: 0.6681675669349053

```
[22]: print(target_column_name+str('_transformed'))
      print(hist1[target_column_name].hist())
```

A549\_transformed

AxesSubplot(0.125,0.11;0.775x0.77)



```
[23]: with_standardization, train_r2_, test_r2_, hist1, hist2, target_column_name,
      ↪ training_data_RMSE, test_data_RMSE = pred_model.
      ↪ prepare_data_and_create_model(molecular_descriptors_df=data,
      ↪
      ↪         correlation_threshold=0.50,
      ↪
      ↪         standardization=True,
      ↪
      ↪         model_type='RandomForestRegressor',
      ↪
      ↪         n_estimators=12,
      ↪
      ↪         target_column_name = target,
      ↪
      ↪         random_state=random_state,
      ↪
      ↪         train_test_split=True,
      ↪
      ↪         verbose=True)
```

I am doing standardization...  
molecular descriptor name

|      |                           |            |                            |
|------|---------------------------|------------|----------------------------|
| 0    | AATSOZ                    |            |                            |
| 1    | AATSOare                  |            |                            |
| 2    | AATSOd                    |            |                            |
| 3    | AATSOdv                   |            |                            |
| 4    | AATSOi                    |            |                            |
|      | molecular descriptor name | corr_value |                            |
| 0    | AATSOZ                    | -0.022797  |                            |
| 1    | AATSOare                  | -0.139064  |                            |
| 2    | AATSOd                    | 0.027592   |                            |
| 3    | AATSOdv                   | -0.136049  |                            |
| 4    | AATSOi                    | 0.168958   |                            |
|      | molecular descriptor name | corr_value | absolute correlation value |
| 0    | AATSOZ                    | -0.022797  | 0.022797                   |
| 1    | AATSOare                  | -0.139064  | 0.139064                   |
| 2    | AATSOd                    | 0.027592   | 0.027592                   |
| 3    | AATSOdv                   | -0.136049  | 0.136049                   |
| 4    | AATSOi                    | 0.168958   | 0.168958                   |
|      | molecular descriptor name | corr_value | absolute correlation value |
| 226  | AMID_0                    | -0.557717  | 0.557717                   |
| 505  | EState_VSA5               | -0.534748  | 0.534748                   |
| 791  | MDEO-12                   | -0.555724  | 0.555724                   |
| 921  | SaasC                     | 0.513071   | 0.513071                   |
| 1091 | VSA_EState5               | 0.526082   | 0.526082                   |
|      | molecular descriptor name | corr_value | absolute correlation value |
| 226  | AMID_0                    | -0.557717  | 0.557717                   |
| 505  | EState_VSA5               | -0.534748  | 0.534748                   |
| 791  | MDEO-12                   | -0.555724  | 0.555724                   |
| 921  | SaasC                     | 0.513071   | 0.513071                   |
| 1091 | VSA_EState5               | 0.526082   | 0.526082                   |

The model used is: RandomForest...

Return the coefficient of determination of the prediction:  
0.5069352440802066

R<sup>2</sup> score: 0.9240354875228499

Correlation coefficient: 0.9612676461438042

Test data - unseen during training:  
R<sup>2</sup> score: 0.5069352440802066

Correlation coefficient: 0.7119938511533696

[7.65137153 7.77327392 7.88934768 7.59369964 5.14608638 8.06568435  
7.93091305 7.87863225 8.06905679 8.04785191 7.2680587 7.62927442  
8.07574813 6.15268454 6.68421748 7.33463177 7.98931088 7.89716909]

|    |          |
|----|----------|
| 44 | 8.193820 |
| 47 | 7.886057 |
| 4  | 7.048177 |
| 55 | 7.886057 |
| 26 | 4.904168 |
| 64 | 8.537602 |
| 73 | 7.657577 |
| 10 | 8.017729 |



```

40      7.920819
107     8.698970
18      6.994819
62      8.886057
11      7.962574
36      6.221126
89      8.022276
91      8.958607
109     7.886057
0       7.966576

```

Name: A549, dtype: float64

Training Root Mean Square Error: 0.2596453671959053

Testing Root Mean Square Error: 0.6681675669349053

### 3.1 Search inside correlation space

```

[24]: step = 0.01
initial_step = corr_low
last_step = corr_high
first_list = [x / 100.0 for x in range(int(initial_step*100),
    ↪int(last_step*100), int(step*100))]
n_estimators = [range(2,21,1)]
corr_th = []
second_list = []
third_list = []
fourth_l = []
fifth_l = []
f_list = []
fif_list = []
for i in first_list:

    for estimator in n_estimators[0]:

        without_standardization, train_r2, test_r2, _, h_, target_column_name,
    ↪training_data_RMSE, test_data_RMSE = pred_model.
    ↪prepare_data_and_create_model(molecular_descriptors_df=data,

    ↪                                correlation_threshold=i,

    ↪                                standardization=False,

    ↪                                model_type='RandomForestRegressor',

    ↪                                n_estimators_=estimator,

    ↪                                target_column_name = target,

```

```

    random_state=random_state,

    train_test_split_=True,

    verbose=False)
    corr_th.append(i)
    second_list.append(train_r2)
    third_list.append(test_r2)
    fourth_l.append(training_data_RMSE)
    fifth_l.append(test_data_RMSE)
    f_list.append(len(h_))
    fif_list.append(estimator)

```

```

[25]: df_without_standardization = pd.DataFrame(data=corr_th, columns=["Correlation_
    ↪threshold"])
df_without_standardization['Training data R^2 score'] = second_list
df_without_standardization['Test data R^2 score'] = third_list
df_without_standardization['Training RMSE'] = fourth_l
df_without_standardization['Test RMSE'] = fifth_l
df_without_standardization['Number of features'] = f_list
df_without_standardization['Number of estimators'] = fif_list

```

```

[26]: df_random_forest = df_without_standardization.copy()
#df_without_standardization.to_excel('../Data/
    ↪A549_Random_forest_rs_'+str(random_state)+'_xlsx')

```

```

[27]: corre_list = [x / 100.0 for x in range(int(initial_step*100),
    ↪int(last_step*100), int(0.01*100))]
for element in corre_list:
    element_ =
    ↪df_without_standardization[df_without_standardization['Correlation_
    ↪threshold'] == float(element)]
    plt.plot(element_['Number of estimators'], element_['Training data R^2_
    ↪score'], label = "Training data R^2 score", marker='v')
    plt.plot(element_['Number of estimators'], element_['Test data R^2 score'],
    ↪label = "Test data R^2 score", marker='D')
    plt.legend()
    plt.xlabel('Number of estimators -> correlation threshold: '+str(element)+'.'
    ↪\n Number of features: '+str(element_['Number of features'].iloc[0]))
    plt.xlim(max(element_['Number of estimators'])+1, min(element_['Number of_
    ↪estimators'])-1)
    plt.ylabel('R^2 score')
    plt.ylim([0, 1])
    plt.rc('grid', linestyle="-. ", color='black')
    plt.grid(True)

```

```
plt.show()
```

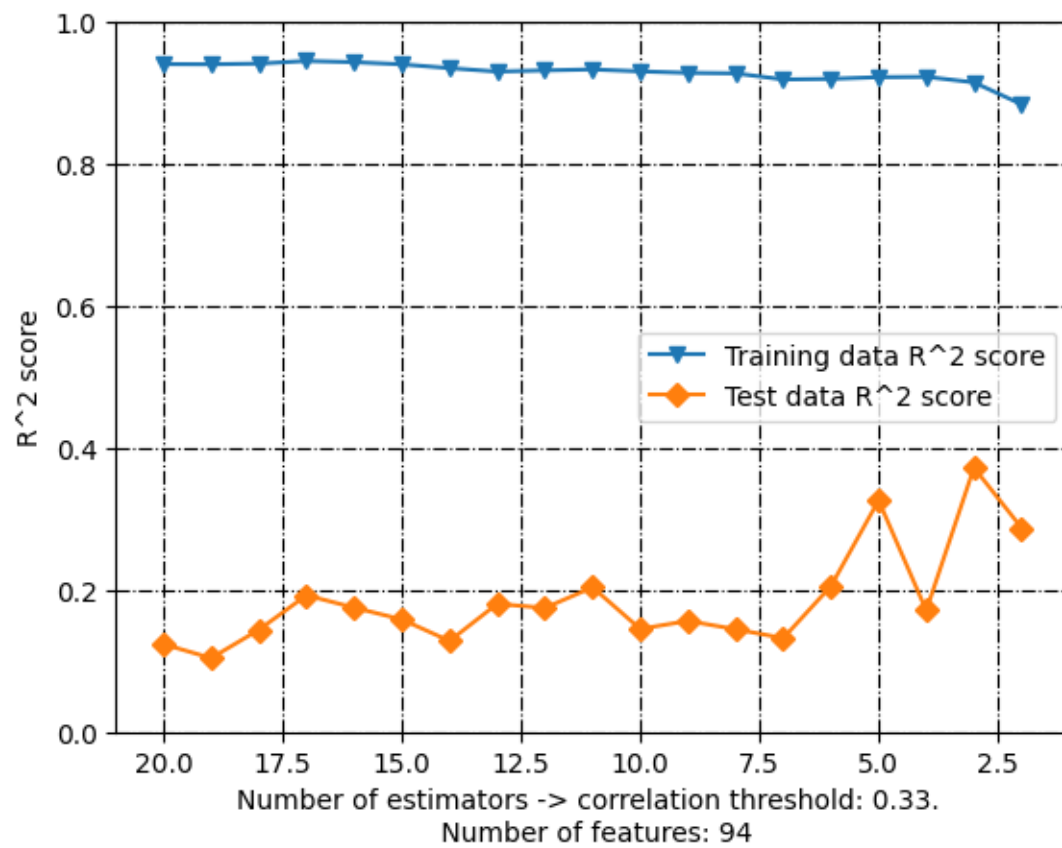

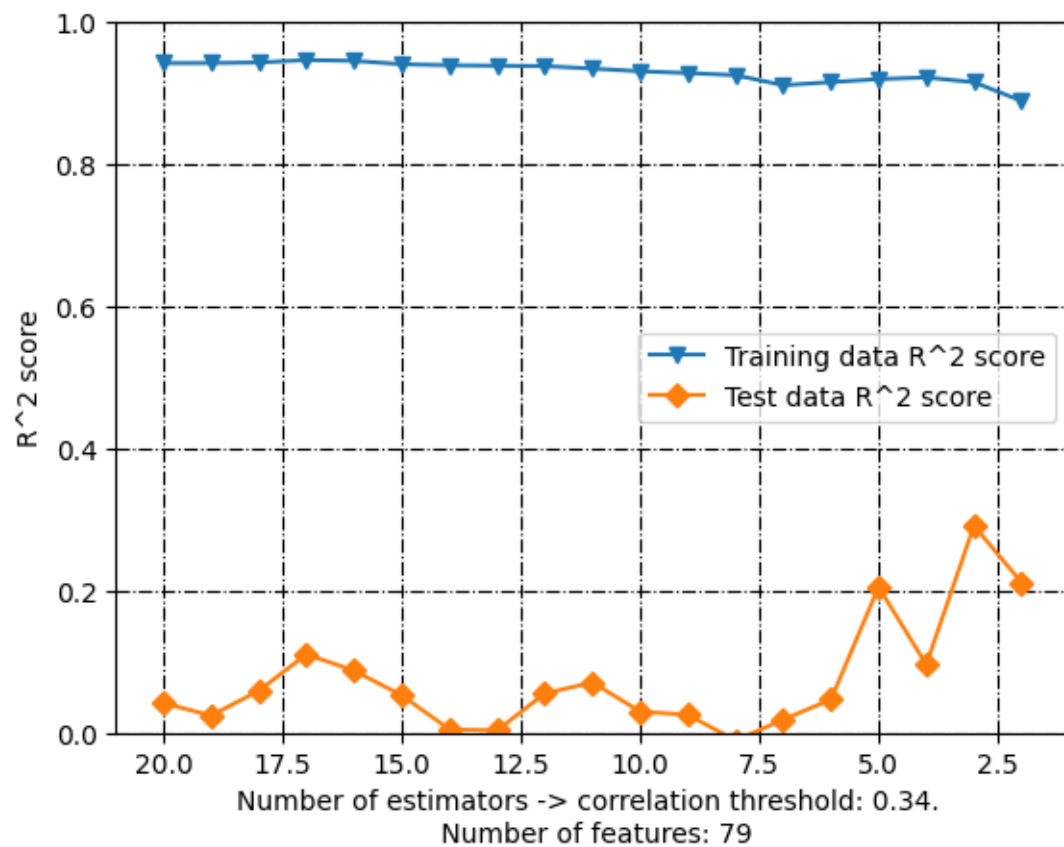

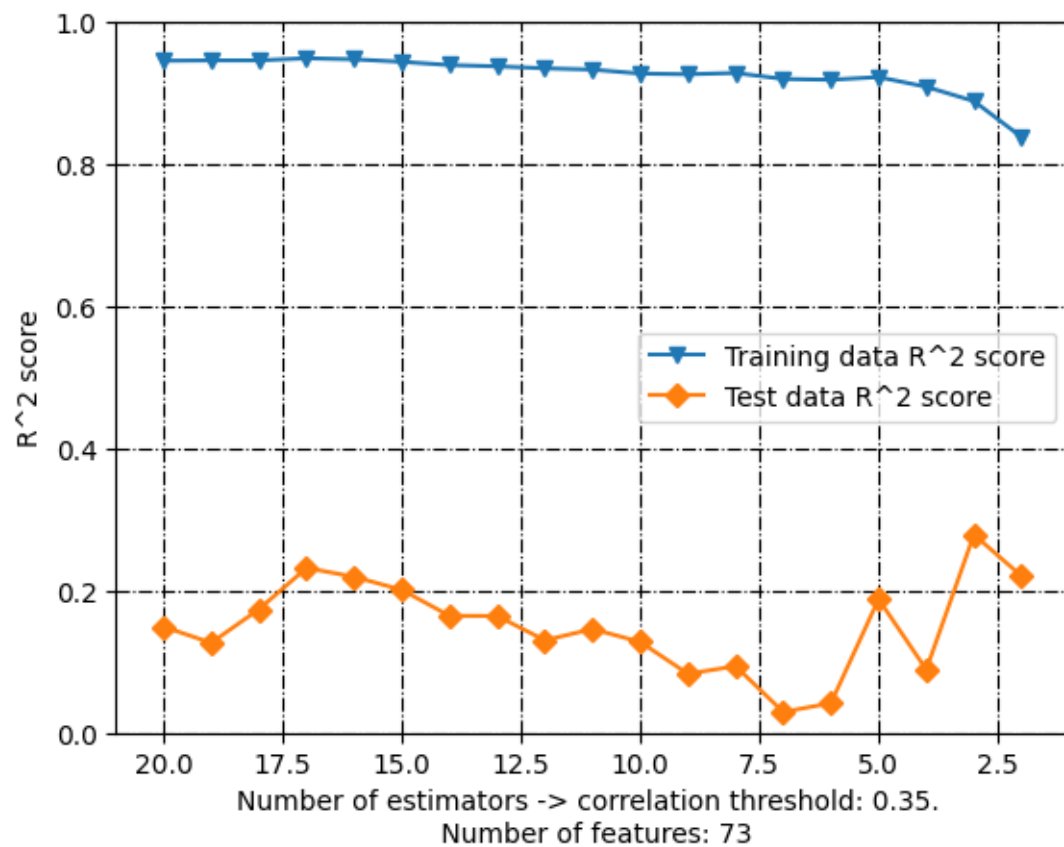

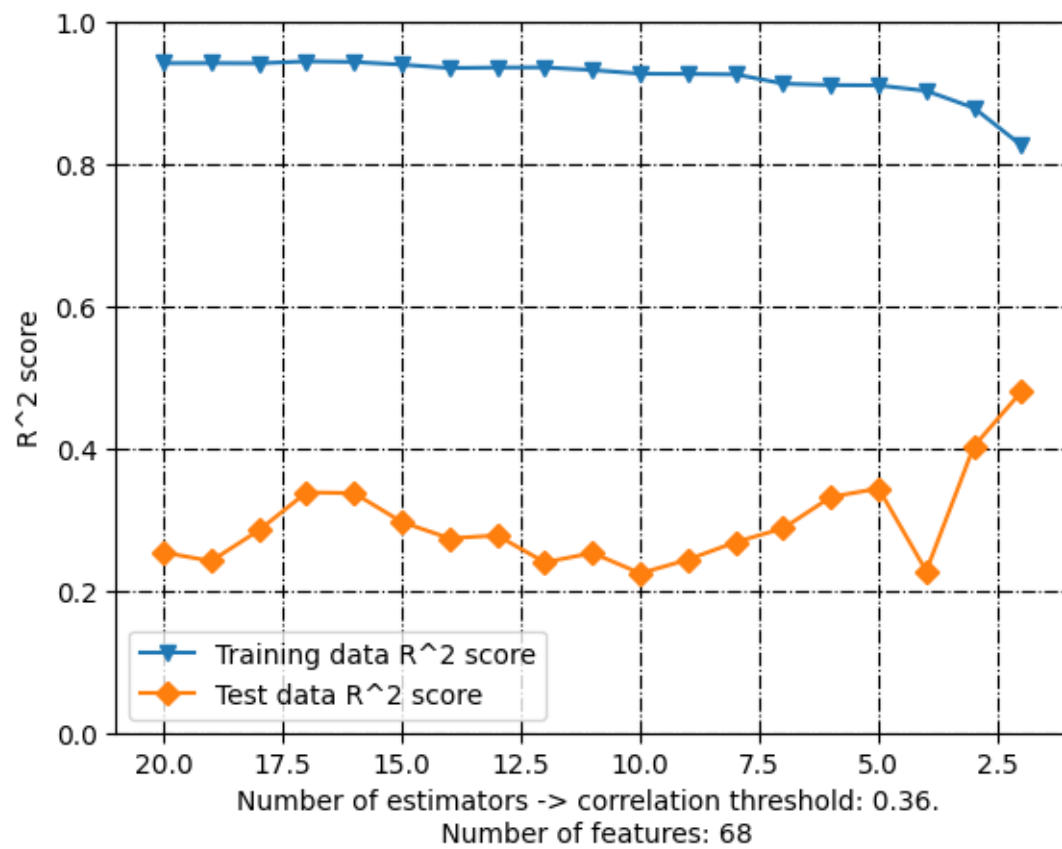

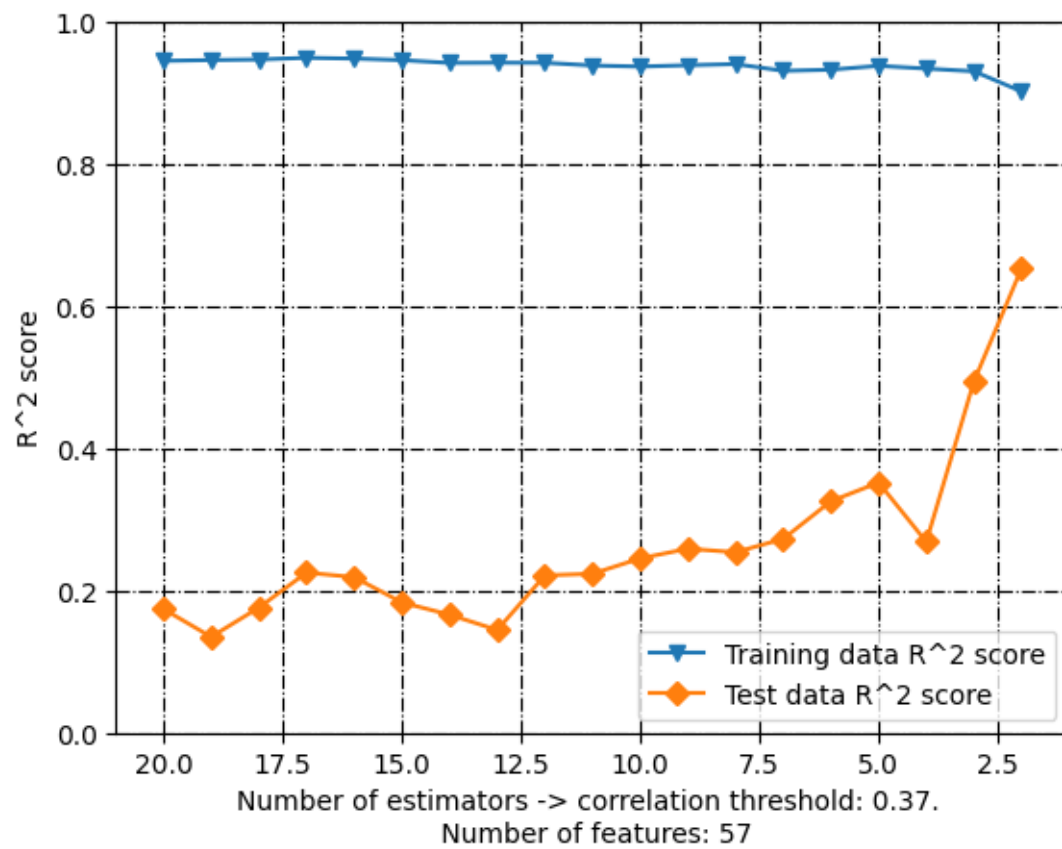

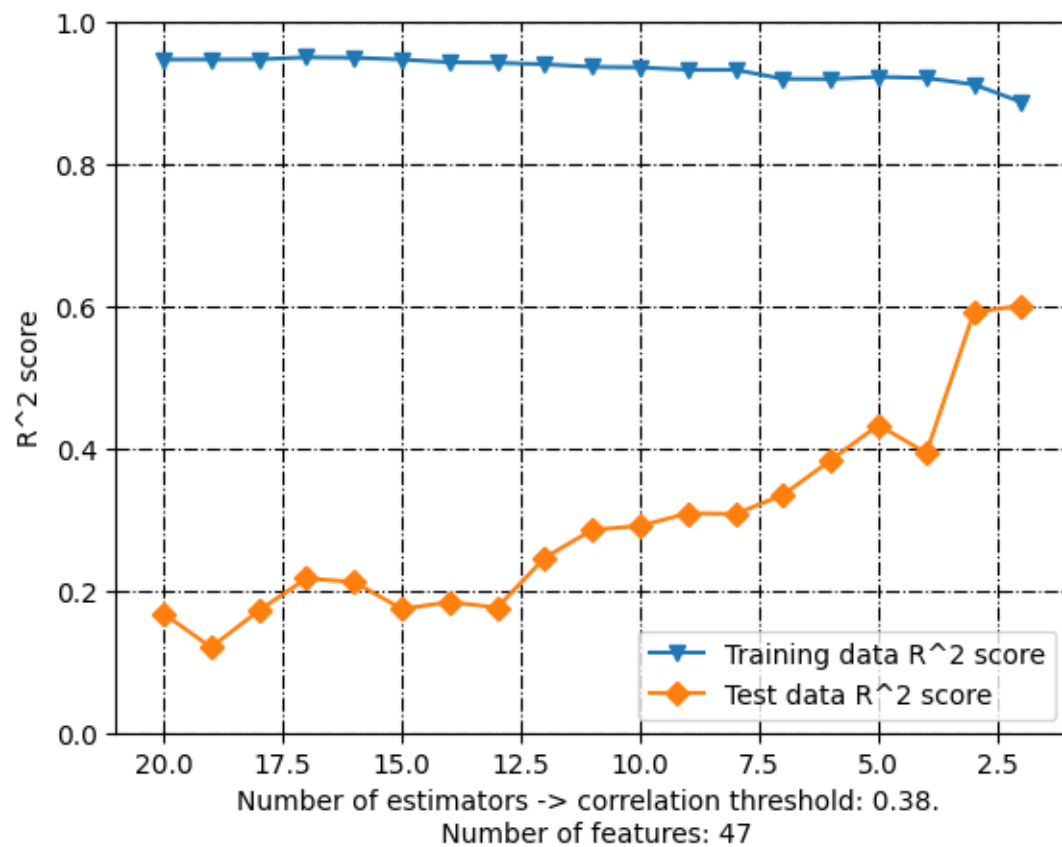



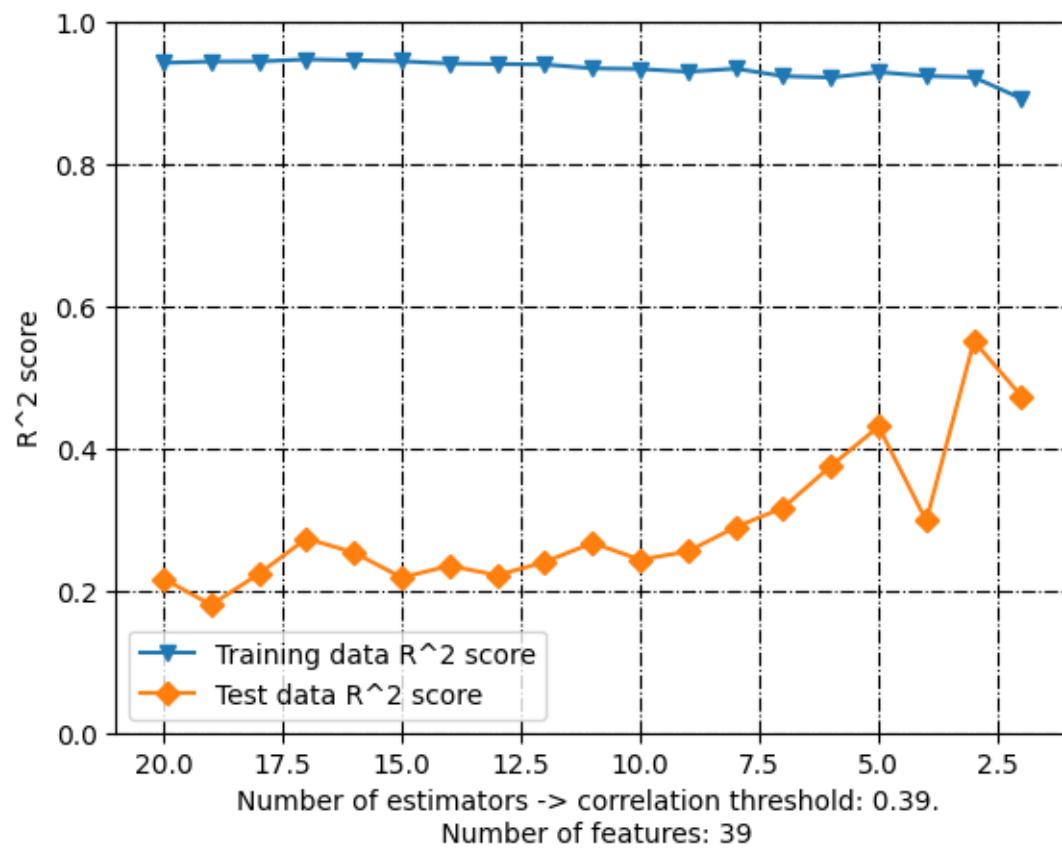

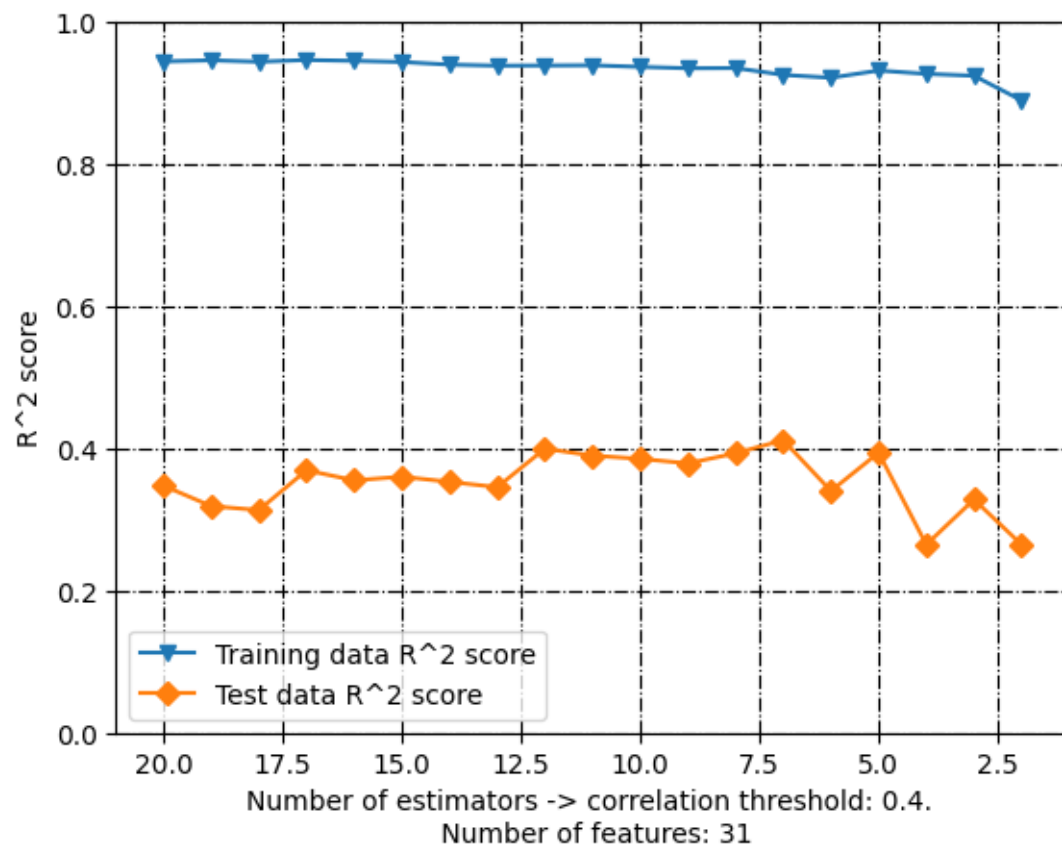

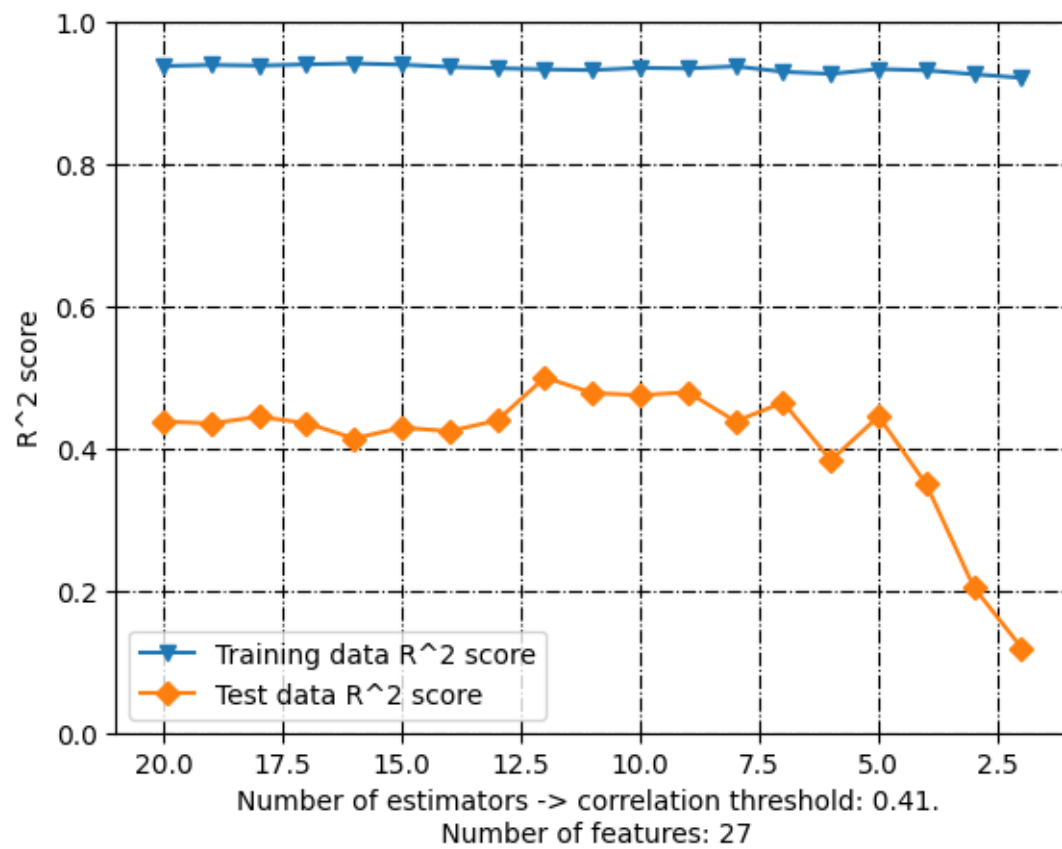

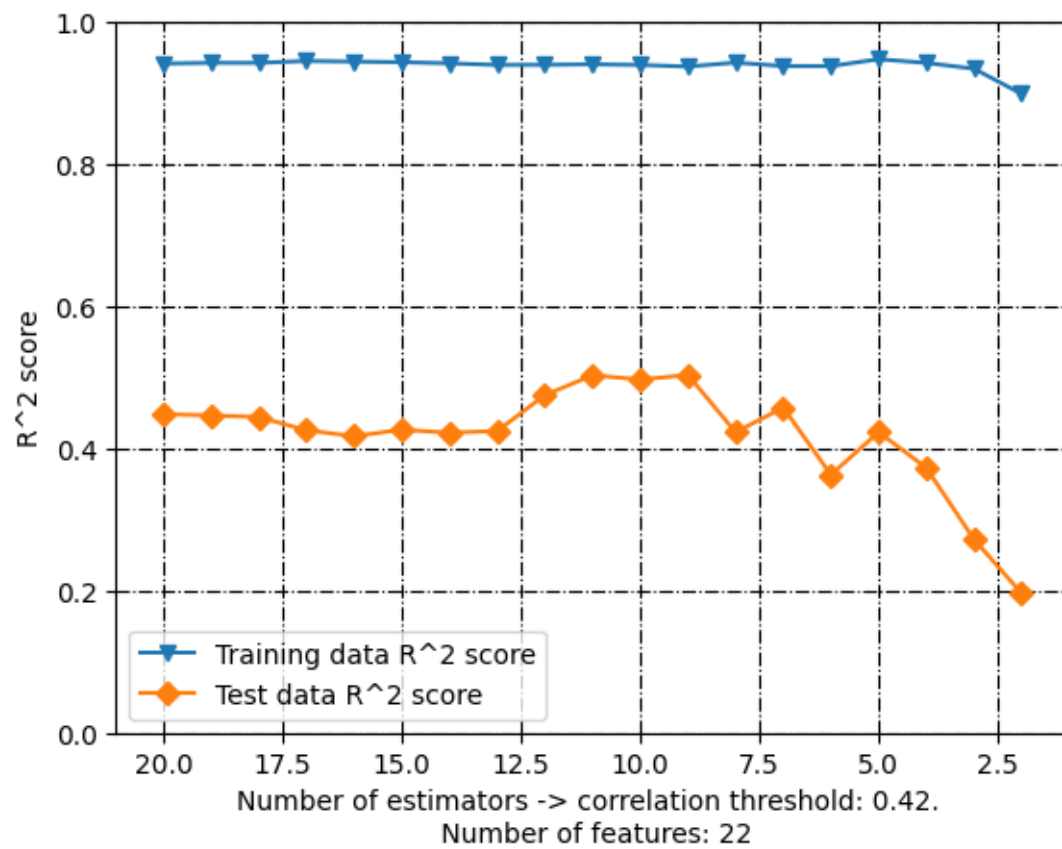

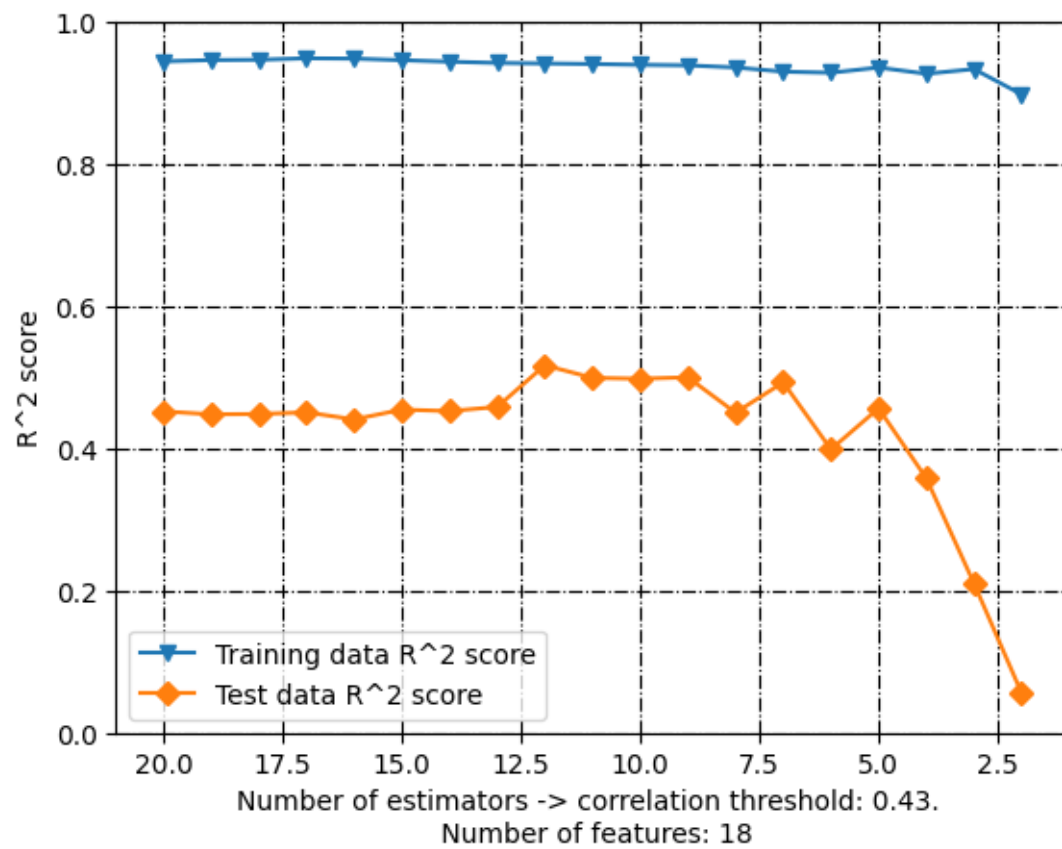

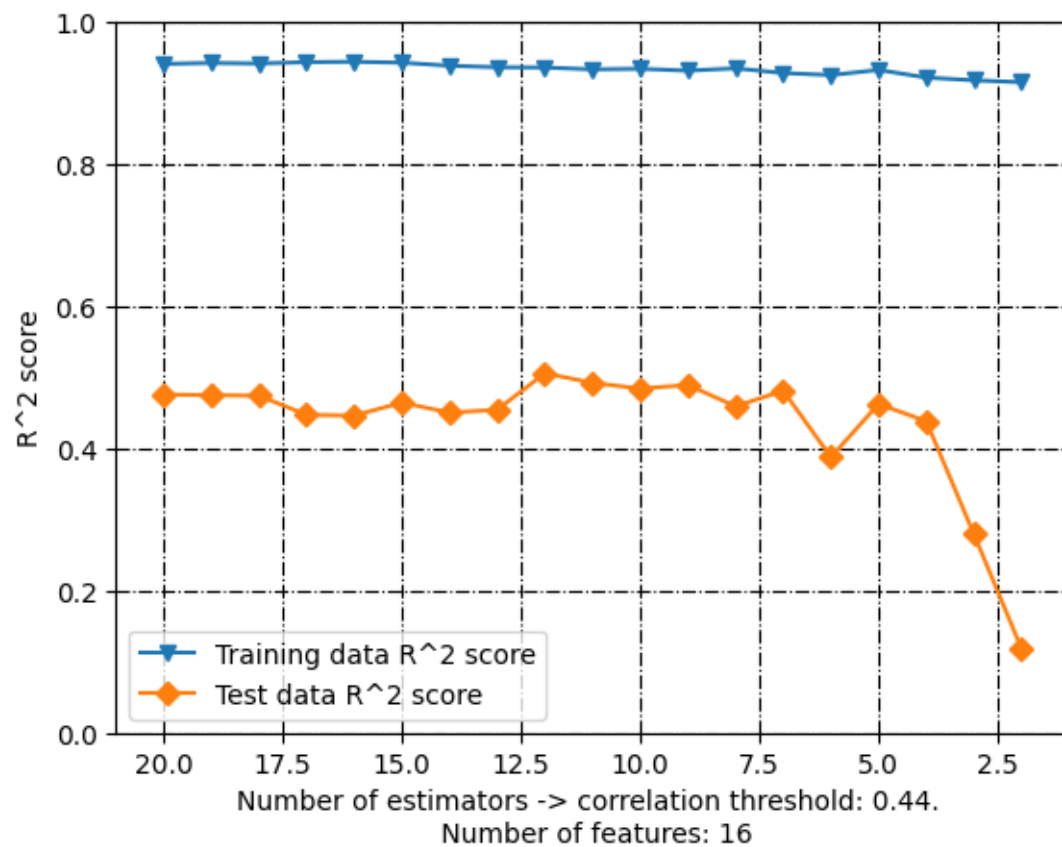

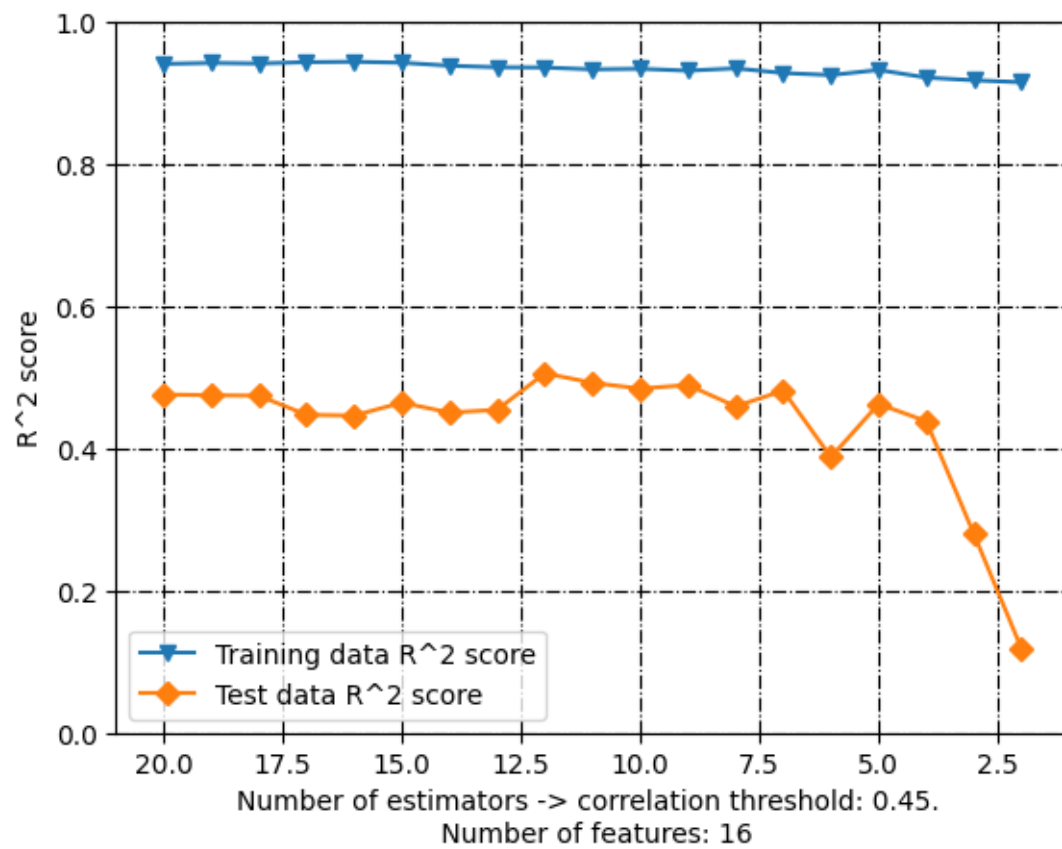

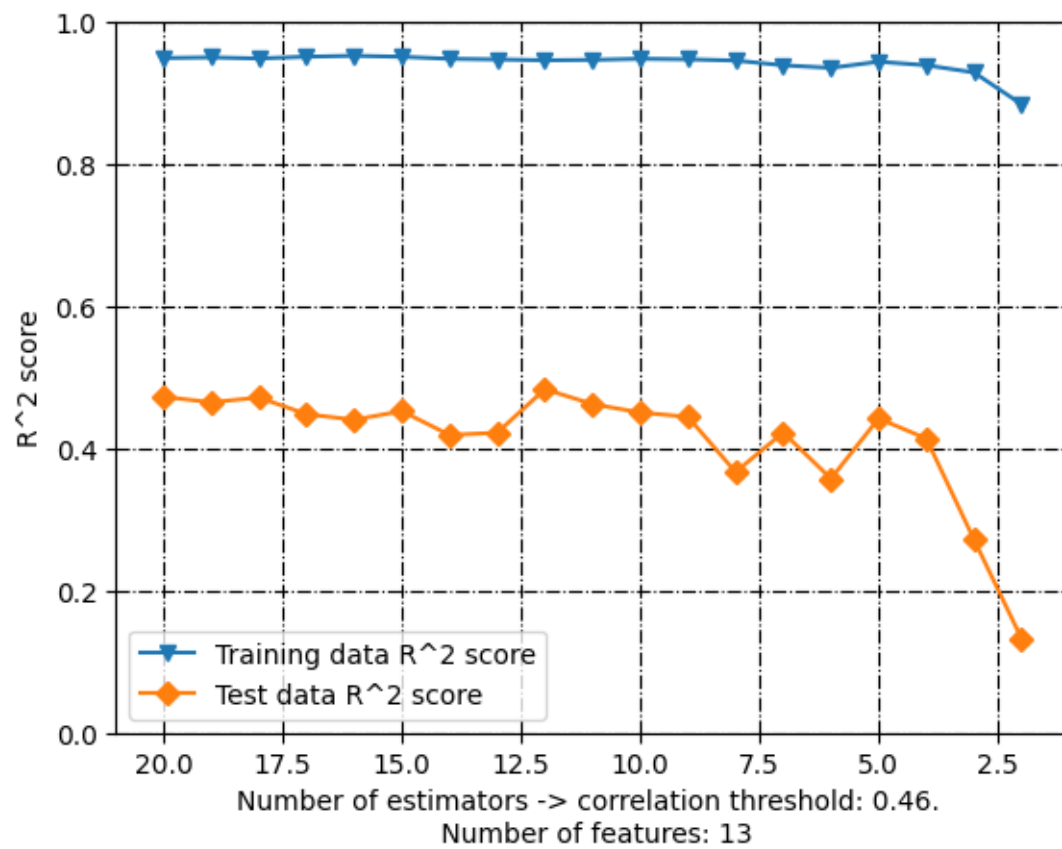



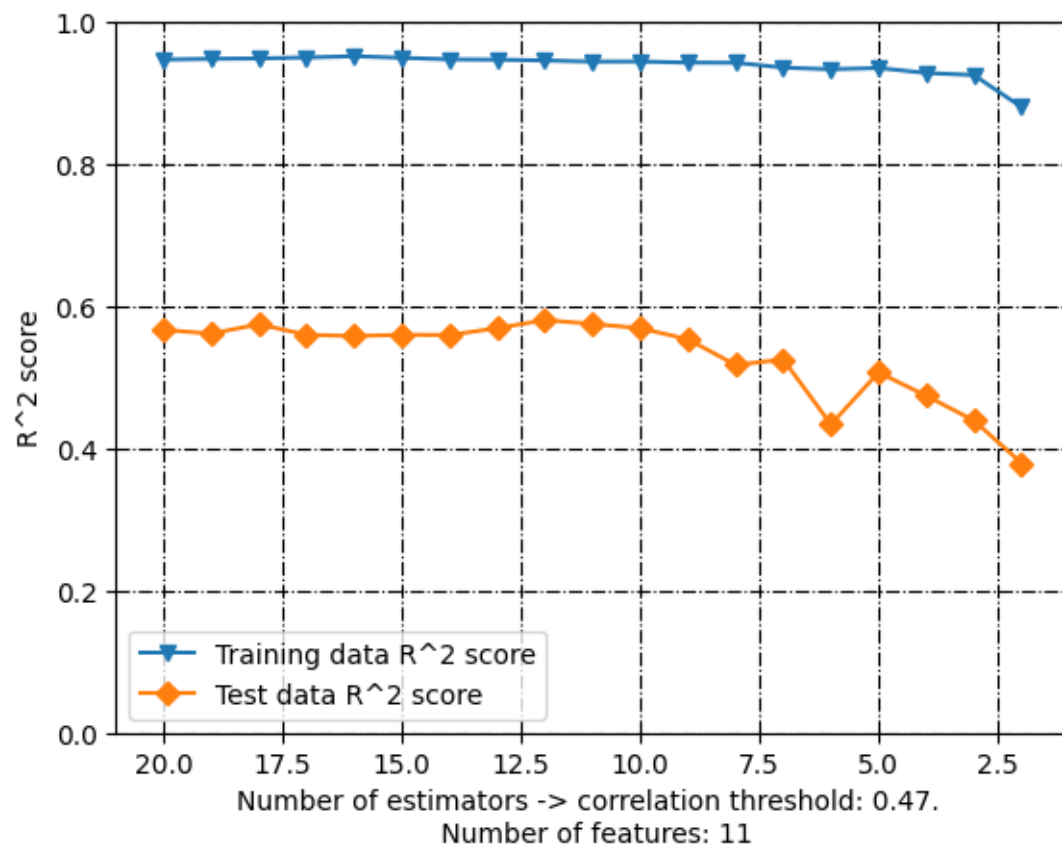

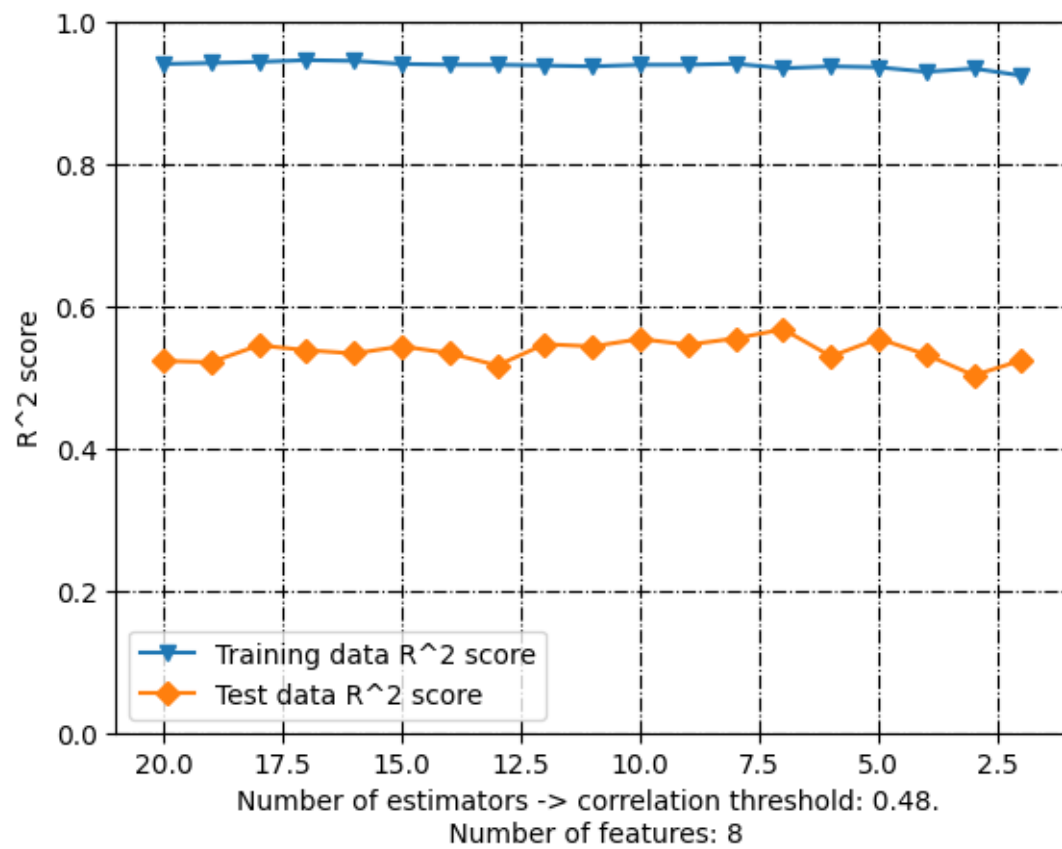

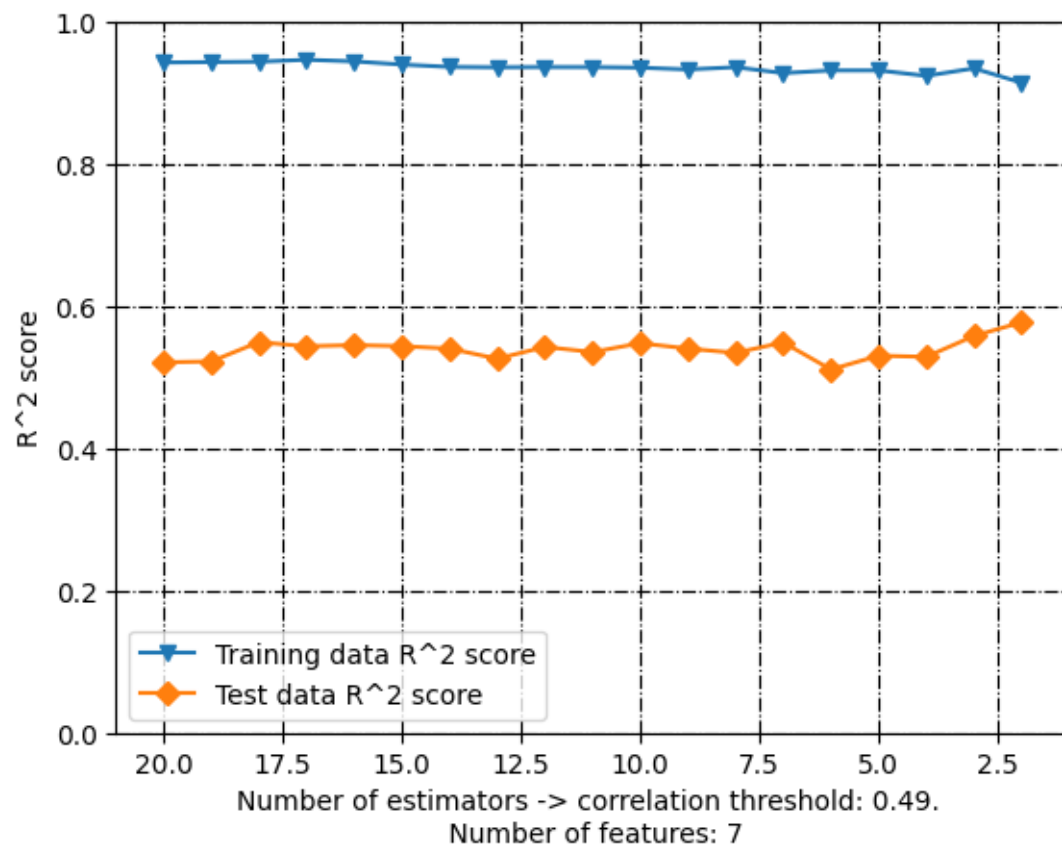

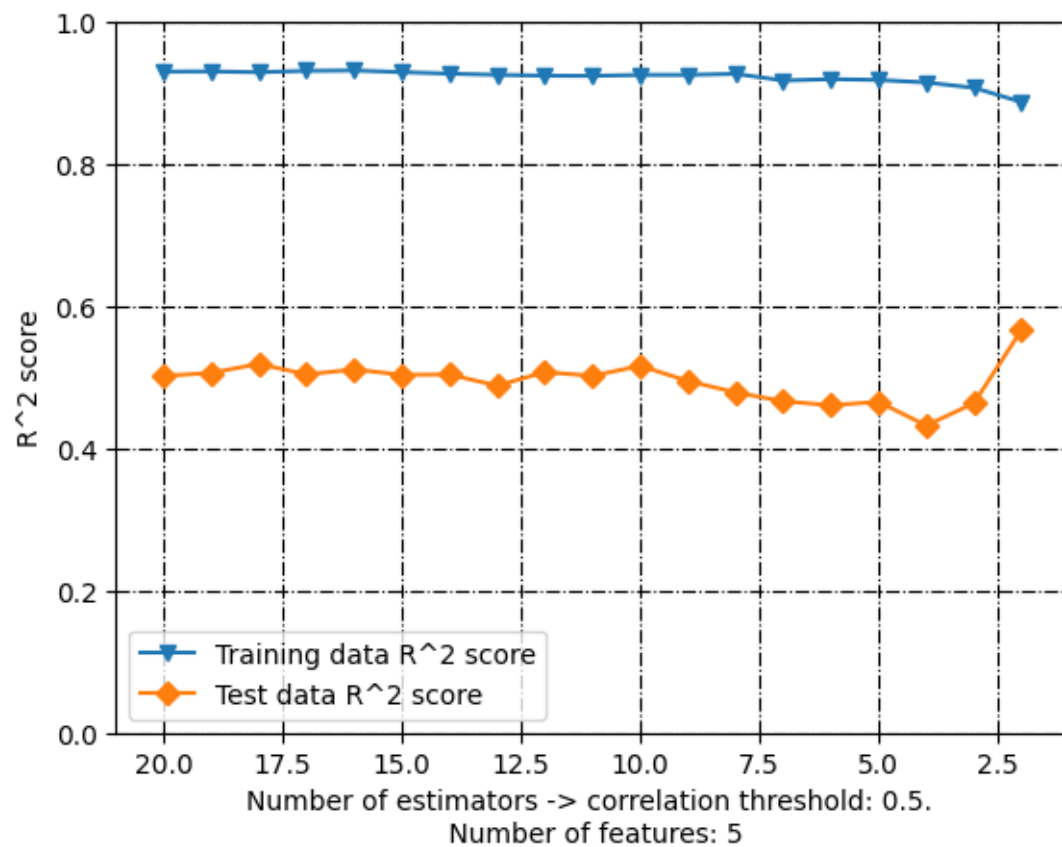

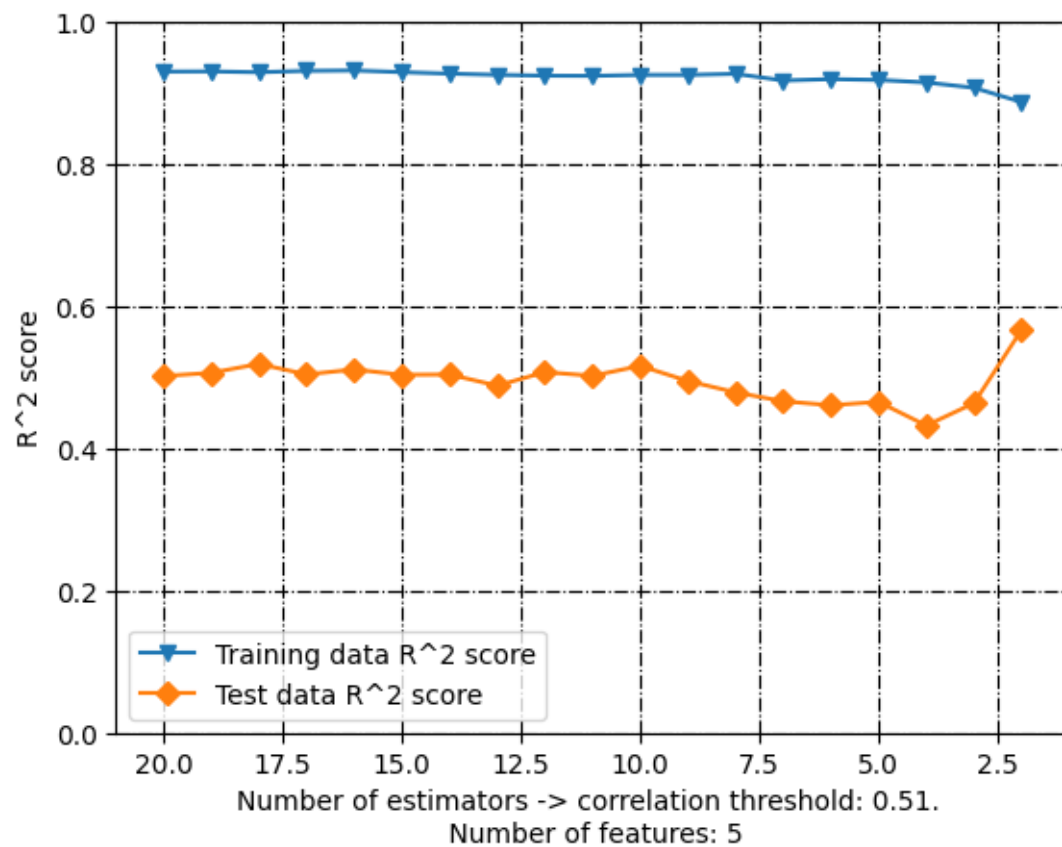

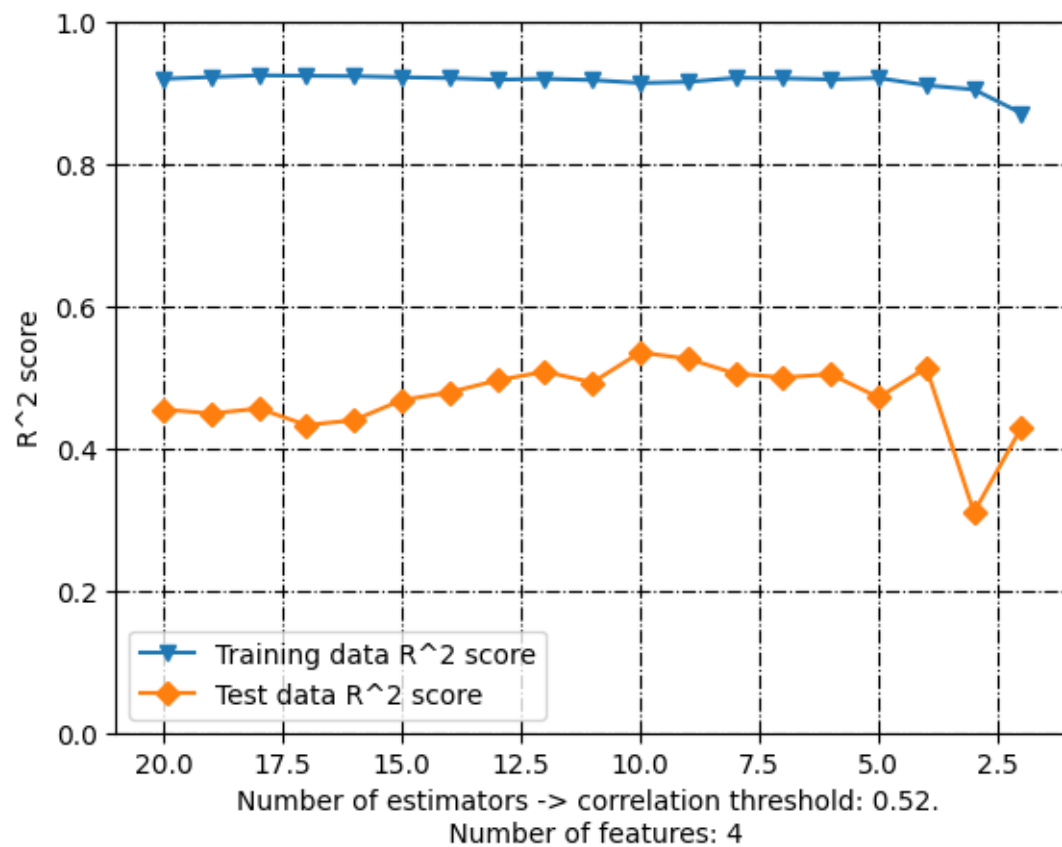

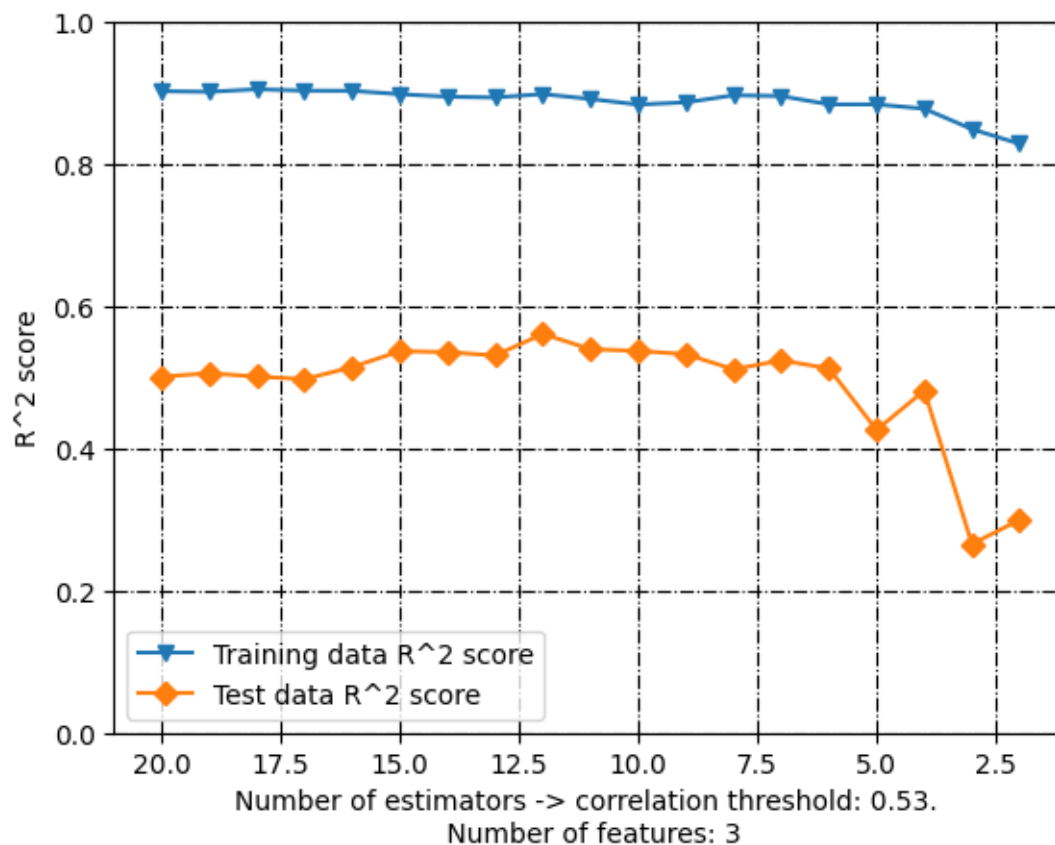

```
[28]: plt.plot(df_without_standardization['Correlation threshold'],  
             df_without_standardization['Number of features'], label = "Number of  
             features", marker='.')  
plt.legend()  
plt.xlabel('Correlation threshold')  
plt.ylabel('Number of features')  
plt.show()
```



[ ]:

## 4 KNeighborsRegressor

```
[29]: without_standardization, train_r2_, test_r2_, hist1, hist2, target_column_name,
      ↪ training_data_RMSE, test_data_RMSE = pred_model.
      ↪ prepare_data_and_create_model(molecular_descriptors_df=data,
      ↪
      ↪         correlation_threshold=0.50,
      ↪
      ↪         standardization=False,
      ↪
      ↪         model_type='KNeighborsRegressor',
      ↪
      ↪         target_column_name = target,
      ↪
      ↪         random_state=random_state,
      ↪
      ↪         train_test_split_=True,
```





verbose=True)



I am not doing standardization...

```
molecular descriptor name
0          AATSOZ
1          AATSOare
2          AATSOd
3          AATSOdv
4          AATSOi
molecular descriptor name  corr_value
0          AATSOZ          -0.022797
1          AATSOare        -0.139064
2          AATSOd           0.027592
3          AATSOdv         -0.136049
4          AATSOi           0.168958
molecular descriptor name  corr_value  absolute correlation value
0          AATSOZ          -0.022797          0.022797
1          AATSOare        -0.139064          0.139064
2          AATSOd           0.027592          0.027592
3          AATSOdv         -0.136049          0.136049
4          AATSOi           0.168958          0.168958
molecular descriptor name  corr_value  absolute correlation value
226          AMID_0        -0.557717          0.557717
505          EState_VSA5   -0.534748          0.534748
791          MDEO-12       -0.555724          0.555724
921          SaasC          0.513071          0.513071
1091         VSA_EState5    0.526082          0.526082
molecular descriptor name  corr_value  absolute correlation value
226          AMID_0        -0.557717          0.557717
505          EState_VSA5   -0.534748          0.534748
791          MDEO-12       -0.555724          0.555724
921          SaasC          0.513071          0.513071
1091         VSA_EState5    0.526082          0.526082
The model used is: KNeighbors...
Return the coefficient of determination of the prediction:
0.40201961974017886
R^2 score: 0.6398367295985287
Correlation coefficient: 0.7998979494901388
Test data - unseen during training:
R^2 score: 0.40201961974017886
Correlation coefficient: 0.6340501713115286
[7.86037589 7.85396571 7.36022595 7.97156198 6.54742656 8.12587932
 7.91433157 7.80354965 7.77853237 7.77853237 7.83649937 7.32741669
 7.49866334 5.36315619 7.32741669 7.91147259 7.77853237 7.97341012]
44      8.193820
47      7.886057
4       7.048177
```

```

55      7.886057
26      4.904168
64      8.537602
73      7.657577
10      8.017729
40      7.920819
107     8.698970
18      6.994819
62      8.886057
11      7.962574
36      6.221126
89      8.022276
91      8.958607
109     7.886057
0       7.966576
Name: A549, dtype: float64
Training Root Mean Square Error: 0.5653597823052801
Testing Root Mean Square Error: 0.7358289633292524

```

```

[30]: print(target_column_name+str('_transformed'))
      print(hist1[target_column_name].hist())

```

```

A549_transformed
AxesSubplot(0.125,0.11;0.775x0.77)

```



```
[31]: with_standardization, train_r2_, test_r2_, hist1, hist2, target_column_name,
      ↪ training_data_RMSE, test_data_RMSE = pred_model.
      ↪ prepare_data_and_create_model(molecular_descriptors_df=data,
      ↪
      ↪         correlation_threshold=0.50,
      ↪
      ↪         standardization=True,
      ↪
      ↪         model_type='KNeighborsRegressor',
      ↪
      ↪         target_column_name = target,
      ↪
      ↪         random_state=random_state,
      ↪
      ↪         train_test_split_=True,
      ↪
      ↪         verbose=True)
```

I am doing standardization...

|      | molecular descriptor name |            |                            |
|------|---------------------------|------------|----------------------------|
| 0    | AATS0Z                    |            |                            |
| 1    | AATS0are                  |            |                            |
| 2    | AATS0d                    |            |                            |
| 3    | AATS0dv                   |            |                            |
| 4    | AATS0i                    |            |                            |
|      | molecular descriptor name | corr_value |                            |
| 0    | AATS0Z                    | -0.022797  |                            |
| 1    | AATS0are                  | -0.139064  |                            |
| 2    | AATS0d                    | 0.027592   |                            |
| 3    | AATS0dv                   | -0.136049  |                            |
| 4    | AATS0i                    | 0.168958   |                            |
|      | molecular descriptor name | corr_value | absolute correlation value |
| 0    | AATS0Z                    | -0.022797  | 0.022797                   |
| 1    | AATS0are                  | -0.139064  | 0.139064                   |
| 2    | AATS0d                    | 0.027592   | 0.027592                   |
| 3    | AATS0dv                   | -0.136049  | 0.136049                   |
| 4    | AATS0i                    | 0.168958   | 0.168958                   |
|      | molecular descriptor name | corr_value | absolute correlation value |
| 226  | AMID_0                    | -0.557717  | 0.557717                   |
| 505  | EState_VSA5               | -0.534748  | 0.534748                   |
| 791  | MDE0-12                   | -0.555724  | 0.555724                   |
| 921  | SaasC                     | 0.513071   | 0.513071                   |
| 1091 | VSA_EState5               | 0.526082   | 0.526082                   |
|      | molecular descriptor name | corr_value | absolute correlation value |
| 226  | AMID_0                    | -0.557717  | 0.557717                   |
| 505  | EState_VSA5               | -0.534748  | 0.534748                   |

|      |             |           |          |
|------|-------------|-----------|----------|
| 791  | MDE0-12     | -0.555724 | 0.555724 |
| 921  | SaasC       | 0.513071  | 0.513071 |
| 1091 | VSA_EState5 | 0.526082  | 0.526082 |

The model used is: KNeighbors...

Return the coefficient of determination of the prediction:

0.40201961974017886

R<sup>2</sup> score: 0.6398367295985287

Correlation coefficient: 0.7998979494901388

Test data - unseen during training:

R<sup>2</sup> score: 0.40201961974017886

Correlation coefficient: 0.6340501713115286

[7.86037589 7.85396571 7.36022595 7.97156198 6.54742656 8.12587932  
7.91433157 7.80354965 7.77853237 7.77853237 7.83649937 7.32741669  
7.49866334 5.36315619 7.32741669 7.91147259 7.77853237 7.97341012]

44 8.193820  
47 7.886057  
4 7.048177  
55 7.886057  
26 4.904168  
64 8.537602  
73 7.657577  
10 8.017729  
40 7.920819  
107 8.698970  
18 6.994819  
62 8.886057  
11 7.962574  
36 6.221126  
89 8.022276  
91 8.958607  
109 7.886057  
0 7.966576

Name: A549, dtype: float64

Training Root Mean Square Error: 0.5653597823052801

Testing Root Mean Square Error: 0.7358289633292524

#### 4.1 Search inside correlation space

```
[32]: step = 0.01
initial_step = corr_low
last_step = corr_high
first_list = [x / 100.0 for x in range(int(initial_step*100),
    ↪int(last_step*100), int(step*100))]
second_list = []
third_list = []
fourth_l = []
fifth_l = []
```

```

f_list = []
for i in first_list:
    without_standardization, train_r2, test_r2, _, h_, target_column_name, \
    ↪ training_data_RMSE, test_data_RMSE = pred_model.
    ↪ prepare_data_and_create_model(molecular_descriptors_df = data,

    ↪ correlation_threshold = i,

    ↪ standardization = False,

    ↪ model_type = 'KNeighborsRegressor',

    ↪ target_column_name = target,

    ↪ random_state=random_state,

    ↪ train_test_split_ = True,

    ↪ verbose = False)
    second_list.append(train_r2)
    third_list.append(test_r2)
    fourth_l.append(training_data_RMSE)
    fifth_l.append(test_data_RMSE)
    f_list.append(len(h_))

```

File "C:\Users\aleks\anaconda3\envs\cheminf\_gpu\lib\site-packages\joblib\externals\loky\backend\context.py", line 217, in \_count\_physical\_cores  
 raise ValueError(

```

[33]: df_without_standardization = pd.DataFrame(data=first_list, \
    ↪ columns=["Correlation threshold"])
df_without_standardization['Training data R^2 score'] = second_list
df_without_standardization['Test data R^2 score'] = third_list
df_without_standardization['Training RMSE'] = fourth_l
df_without_standardization['Test RMSE'] = fifth_l
df_without_standardization['Number of features'] = f_list

```

```

[34]: df_k_nearest = df_without_standardization.copy()
df_without_standardization

```

```

[34]: Correlation threshold  Training data R^2 score  Test data R^2 score  \
0                0.33          0.419236          0.110036
1                0.34          0.620736          0.281529
2                0.35          0.623656          0.281970
3                0.36          0.613087          0.259050
4                0.37          0.619949          0.270481

```

|    |      |          |          |
|----|------|----------|----------|
| 5  | 0.38 | 0.709012 | 0.388740 |
| 6  | 0.39 | 0.695405 | 0.345556 |
| 7  | 0.40 | 0.644268 | 0.429335 |
| 8  | 0.41 | 0.644268 | 0.429335 |
| 9  | 0.42 | 0.637618 | 0.407672 |
| 10 | 0.43 | 0.628703 | 0.490193 |
| 11 | 0.44 | 0.626614 | 0.473322 |
| 12 | 0.45 | 0.626614 | 0.473322 |
| 13 | 0.46 | 0.540127 | 0.140240 |
| 14 | 0.47 | 0.549909 | 0.126217 |
| 15 | 0.48 | 0.655201 | 0.389796 |
| 16 | 0.49 | 0.623380 | 0.381359 |
| 17 | 0.50 | 0.639837 | 0.402020 |
| 18 | 0.51 | 0.639837 | 0.402020 |
| 19 | 0.52 | 0.595532 | 0.426520 |
| 20 | 0.53 | 0.575237 | 0.454865 |

|    | Training RMSE | Test RMSE | Number of features |
|----|---------------|-----------|--------------------|
| 0  | 0.717918      | 0.897676  | 94                 |
| 1  | 0.580158      | 0.806563  | 79                 |
| 2  | 0.577920      | 0.806315  | 73                 |
| 3  | 0.585979      | 0.819083  | 68                 |
| 4  | 0.580759      | 0.812740  | 57                 |
| 5  | 0.508174      | 0.743955  | 47                 |
| 6  | 0.519920      | 0.769785  | 39                 |
| 7  | 0.561871      | 0.718826  | 31                 |
| 8  | 0.561871      | 0.718826  | 27                 |
| 9  | 0.567098      | 0.732343  | 22                 |
| 10 | 0.574032      | 0.679417  | 18                 |
| 11 | 0.575644      | 0.690567  | 16                 |
| 12 | 0.575644      | 0.690567  | 16                 |
| 13 | 0.638843      | 0.882312  | 13                 |
| 14 | 0.632012      | 0.889478  | 11                 |
| 15 | 0.553169      | 0.743312  | 8                  |
| 16 | 0.578132      | 0.748433  | 7                  |
| 17 | 0.565360      | 0.735829  | 5                  |
| 18 | 0.565360      | 0.735829  | 5                  |
| 19 | 0.599125      | 0.720597  | 4                  |
| 20 | 0.613972      | 0.702563  | 3                  |

## 4.2 Plots

```
[35]: plt.plot(df_without_standardization['Correlation threshold'],  
             ↪df_without_standardization['Training data R^2 score'], label = "Training",  
             ↪data R^2 score", marker='v')
```

```
plt.plot(df_without_standardization['Correlation threshold'],  
         df_without_standardization['Test data R^2 score'], label = "Test data R^2 score", marker='D')  
plt.legend()  
plt.xlabel('Correlation threshold')  
plt.ylabel('R^2 score')  
plt.ylim([0, 1])  
plt.show()
```

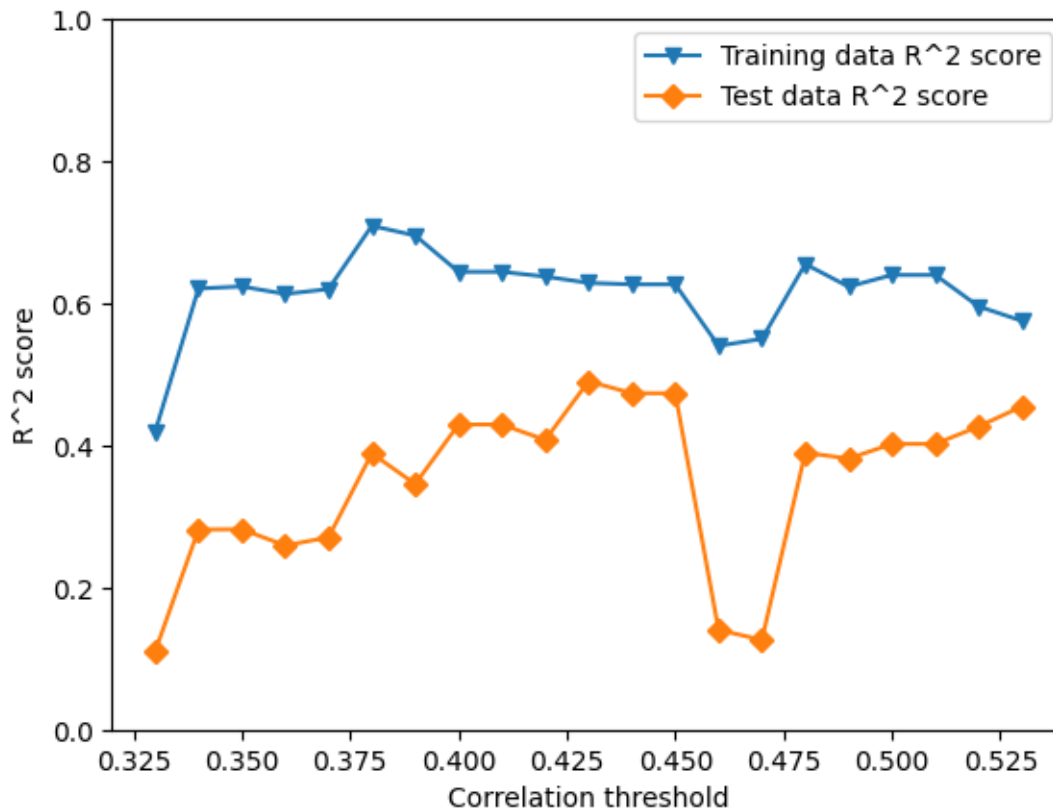

```
[36]: plt.plot(df_without_standardization['Correlation threshold'],  
              df_without_standardization['Number of features'], label = "Number of features", marker='.')  
plt.legend()  
plt.xlabel('Correlation threshold')  
plt.ylabel('Number of features')  
plt.show()
```



[ ]:

## 5 Support Vector Machines (SVM)

```
[37]: without_standardization, train_r2_, test_r2_, hist1, hist2, target_column_name,
      ↪ training_data_RMSE, test_data_RMSE = pred_model.
      ↪ prepare_data_and_create_model(molecular_descriptors_df=data,
      ↪
      ↪         correlation_threshold=0.50,
      ↪
      ↪         standardization=False,
      ↪
      ↪         model_type='SVR',
      ↪
      ↪         kernel_ = 'linear',
      ↪
      ↪         gamma_ = 'auto',
      ↪
      ↪         target_column_name = target,
```



```

↪          random_state=random_state,
↪          train_test_split_=True,
↪          verbose=True)

```

I am not doing standardization...

|   | molecular descriptor name |  |
|---|---------------------------|--|
| 0 | AATSOZ                    |  |
| 1 | AATSOare                  |  |
| 2 | AATSOd                    |  |
| 3 | AATSOdv                   |  |
| 4 | AATSOi                    |  |

  

|   | molecular descriptor name | corr_value |
|---|---------------------------|------------|
| 0 | AATSOZ                    | -0.022797  |
| 1 | AATSOare                  | -0.139064  |
| 2 | AATSOd                    | 0.027592   |
| 3 | AATSOdv                   | -0.136049  |
| 4 | AATSOi                    | 0.168958   |

  

|   | molecular descriptor name | corr_value | absolute correlation value |
|---|---------------------------|------------|----------------------------|
| 0 | AATSOZ                    | -0.022797  | 0.022797                   |
| 1 | AATSOare                  | -0.139064  | 0.139064                   |
| 2 | AATSOd                    | 0.027592   | 0.027592                   |
| 3 | AATSOdv                   | -0.136049  | 0.136049                   |
| 4 | AATSOi                    | 0.168958   | 0.168958                   |

  

|      | molecular descriptor name | corr_value | absolute correlation value |
|------|---------------------------|------------|----------------------------|
| 226  | AMID_0                    | -0.557717  | 0.557717                   |
| 505  | EState_VSA5               | -0.534748  | 0.534748                   |
| 791  | MDEO-12                   | -0.555724  | 0.555724                   |
| 921  | SaasC                     | 0.513071   | 0.513071                   |
| 1091 | VSA_EState5               | 0.526082   | 0.526082                   |

  

|      | molecular descriptor name | corr_value | absolute correlation value |
|------|---------------------------|------------|----------------------------|
| 226  | AMID_0                    | -0.557717  | 0.557717                   |
| 505  | EState_VSA5               | -0.534748  | 0.534748                   |
| 791  | MDEO-12                   | -0.555724  | 0.555724                   |
| 921  | SaasC                     | 0.513071   | 0.513071                   |
| 1091 | VSA_EState5               | 0.526082   | 0.526082                   |

The model used is: SVR...

Return the coefficient of determination of the prediction:

0.2903936494024443

R<sup>2</sup> score: 0.46535014249070705

Correlation coefficient: 0.6821657734676426

Test data - unseen during training:

R<sup>2</sup> score: 0.2903936494024443

Correlation coefficient: 0.5388818510605495

[8.08842982 8.03970835 7.59466752 7.16843679 6.16607786 7.64730244

```

7.86237616 7.91496845 7.87298659 7.8748025 8.07266322 6.68543785
7.99377392 6.36729262 7.00073775 8.24618922 7.88604911 7.82525623]
44      8.193820
47      7.886057
4       7.048177
55      7.886057
26      4.904168
64      8.537602
73      7.657577
10      8.017729
40      7.920819
107     8.698970
18      6.994819
62      8.886057
11      7.962574
36      6.221126
89      8.022276
91      8.958607
109     7.886057
0       7.966576

```

Name: A549, dtype: float64

Training Root Mean Square Error: 0.6888266293809975

Testing Root Mean Square Error: 0.8015712973186128

```

[38]: print(target_column_name+str('_transformed'))
      print(hist1[target_column_name].hist())

```

A549\_transformed

AxesSubplot(0.125,0.11;0.775x0.77)



```
[39]: with_standardization, train_r2_, test_r2_, hist1, hist2, target_column_name,
      ↪ training_data_RMSE, test_data_RMSE = pred_model.
      ↪ prepare_data_and_create_model(molecular_descriptors_df=data,
      ↪
      ↪         correlation_threshold=0.50,
      ↪
      ↪         standardization=True,
      ↪
      ↪         model_type='SVR',
      ↪
      ↪         kernel_ = 'linear',
      ↪
      ↪         gamma_ = 'auto',
      ↪
      ↪         target_column_name = target,
      ↪
      ↪         random_state=random_state,
      ↪
      ↪         train_test_split_=True,
      ↪
      ↪         verbose=True)
```

I am doing standardization...

molecular descriptor name

|   |          |
|---|----------|
| 0 | AATSOZ   |
| 1 | AATSOare |
| 2 | AATSOd   |
| 3 | AATSOdv  |
| 4 | AATSOi   |

|   | molecular descriptor name | corr_value |
|---|---------------------------|------------|
| 0 | AATSOZ                    | -0.022797  |
| 1 | AATSOare                  | -0.139064  |
| 2 | AATSOd                    | 0.027592   |
| 3 | AATSOdv                   | -0.136049  |
| 4 | AATSOi                    | 0.168958   |

|   | molecular descriptor name | corr_value | absolute correlation value |
|---|---------------------------|------------|----------------------------|
| 0 | AATSOZ                    | -0.022797  | 0.022797                   |
| 1 | AATSOare                  | -0.139064  | 0.139064                   |
| 2 | AATSOd                    | 0.027592   | 0.027592                   |
| 3 | AATSOdv                   | -0.136049  | 0.136049                   |
| 4 | AATSOi                    | 0.168958   | 0.168958                   |

|      | molecular descriptor name | corr_value | absolute correlation value |
|------|---------------------------|------------|----------------------------|
| 226  | AMID_0                    | -0.557717  | 0.557717                   |
| 505  | EState_VSA5               | -0.534748  | 0.534748                   |
| 791  | MDEO-12                   | -0.555724  | 0.555724                   |
| 921  | SaasC                     | 0.513071   | 0.513071                   |
| 1091 | VSA_EState5               | 0.526082   | 0.526082                   |

|      | molecular descriptor name | corr_value | absolute correlation value |
|------|---------------------------|------------|----------------------------|
| 226  | AMID_0                    | -0.557717  | 0.557717                   |
| 505  | EState_VSA5               | -0.534748  | 0.534748                   |
| 791  | MDEO-12                   | -0.555724  | 0.555724                   |
| 921  | SaasC                     | 0.513071   | 0.513071                   |
| 1091 | VSA_EState5               | 0.526082   | 0.526082                   |

The model used is: SVR...

Return the coefficient of determination of the prediction:

0.2903936494024443

R<sup>2</sup> score: 0.46535014249070705

Correlation coefficient: 0.6821657734676426

Test data - unseen during training:

R<sup>2</sup> score: 0.2903936494024443

Correlation coefficient: 0.5388818510605495

[8.08842982 8.03970835 7.59466752 7.16843679 6.16607786 7.64730244  
7.86237616 7.91496845 7.87298659 7.8748025 8.07266322 6.68543785  
7.99377392 6.36729262 7.00073775 8.24618922 7.88604911 7.82525623]

|    |          |
|----|----------|
| 44 | 8.193820 |
| 47 | 7.886057 |
| 4  | 7.048177 |
| 55 | 7.886057 |
| 26 | 4.904168 |
| 64 | 8.537602 |

```

73      7.657577
10      8.017729
40      7.920819
107     8.698970
18      6.994819
62      8.886057
11      7.962574
36      6.221126
89      8.022276
91      8.958607
109     7.886057
0       7.966576

```

Name: A549, dtype: float64

Training Root Mean Square Error: 0.6888266293809975

Testing Root Mean Square Error: 0.8015712973186128

## 5.1 Search inside correlation space

```

[40]: step = 0.01
      initial_step = corr_low
      last_step = corr_high
      first_list = [x / 100.0 for x in range(int(initial_step*100),
      ↪int(last_step*100), int(step*100))]
      second_list = []
      third_list = []
      fourth_l = []
      fifth_l = []
      f_list = []
      for i in first_list:
          without_standardization, train_r2, test_r2, _, h_, target_column_name,
          ↪training_data_RMSE, test_data_RMSE = pred_model.
          ↪prepare_data_and_create_model(molecular_descriptors_df = data,

          ↪
          ↪correlation_threshold = i,
          ↪
          ↪standardization = False,
          ↪
          ↪model_type = 'SVR',
          ↪
          ↪kernel_ = 'linear',
          ↪
          ↪gamma_ = 'auto',
          ↪
          ↪target_column_name = target,
          ↪
          ↪random_state=random_state,

```

```

    ↪          train_test_split_ = True,

    ↪          verbose = False)
second_list.append(train_r2)
third_list.append(test_r2)
fourth_l.append(training_data_RMSE)
fifth_l.append(test_data_RMSE)
f_list.append(len(h_))

```

```

[41]: df_without_standardization = pd.DataFrame(data=first_list,
    ↪      columns=["Correlation threshold"])
df_without_standardization['Training data R^2 score'] = second_list
df_without_standardization['Test data R^2 score'] = third_list
df_without_standardization['Training RMSE'] = fourth_l
df_without_standardization['Test RMSE'] = fifth_l
df_without_standardization['Number of features'] = f_list

```

```

[42]: df_svm = df_without_standardization.copy()
df_without_standardization

```

```

[42]:
Correlation threshold  Training data R^2 score  Test data R^2 score  \
0                    0.33                    0.743433          0.679759
1                    0.34                    0.707639          0.683938
2                    0.35                    0.707945          0.687329
3                    0.36                    0.668367          0.546185
4                    0.37                    0.662693          0.493890
5                    0.38                    0.613721          0.336667
6                    0.39                    0.590237          0.042945
7                    0.40                    0.570338          0.251611
8                    0.41                    0.570390          0.270412
9                    0.42                    0.572385          0.242621
10                   0.43                    0.579096          0.345766
11                   0.44                    0.565823          0.394060
12                   0.45                    0.565823          0.394060
13                   0.46                    0.562645          0.380883
14                   0.47                    0.545067          0.409121
15                   0.48                    0.496560          0.415594
16                   0.49                    0.462930          0.313821
17                   0.50                    0.465350          0.290394
18                   0.51                    0.465350          0.290394
19                   0.52                    0.455708          0.318651
20                   0.53                    0.414234          0.445803

Training RMSE  Test RMSE  Number of features
0          0.477173    0.538483              94
1          0.509372    0.534958              79

```

|    |          |          |    |
|----|----------|----------|----|
| 2  | 0.509105 | 0.532080 | 73 |
| 3  | 0.542506 | 0.641022 | 68 |
| 4  | 0.547126 | 0.676949 | 57 |
| 5  | 0.585499 | 0.774995 | 47 |
| 6  | 0.603034 | 0.930897 | 39 |
| 7  | 0.617502 | 0.823185 | 31 |
| 8  | 0.617465 | 0.812778 | 27 |
| 9  | 0.616030 | 0.828114 | 22 |
| 10 | 0.611177 | 0.769662 | 18 |
| 11 | 0.620738 | 0.740710 | 16 |
| 12 | 0.620738 | 0.740710 | 16 |
| 13 | 0.623006 | 0.748721 | 13 |
| 14 | 0.635403 | 0.731446 | 11 |
| 15 | 0.668419 | 0.727429 | 8  |
| 16 | 0.690384 | 0.788229 | 7  |
| 17 | 0.688827 | 0.801571 | 5  |
| 18 | 0.688827 | 0.801571 | 5  |
| 19 | 0.695010 | 0.785450 | 4  |
| 20 | 0.721003 | 0.708379 | 3  |

## 5.2 Plots

```
[43]: plt.plot(df_without_standardization['Correlation threshold'],
    ↪df_without_standardization['Training data R^2 score'], label = "Training
    ↪data R^2 score", marker='v')
plt.plot(df_without_standardization['Correlation threshold'],
    ↪df_without_standardization['Test data R^2 score'], label = "Test data R^2
    ↪score", marker='D')
plt.legend()
plt.xlabel('Correlation threshold')
plt.ylabel('R^2 score')
plt.ylim([0, 1])
plt.show()
```

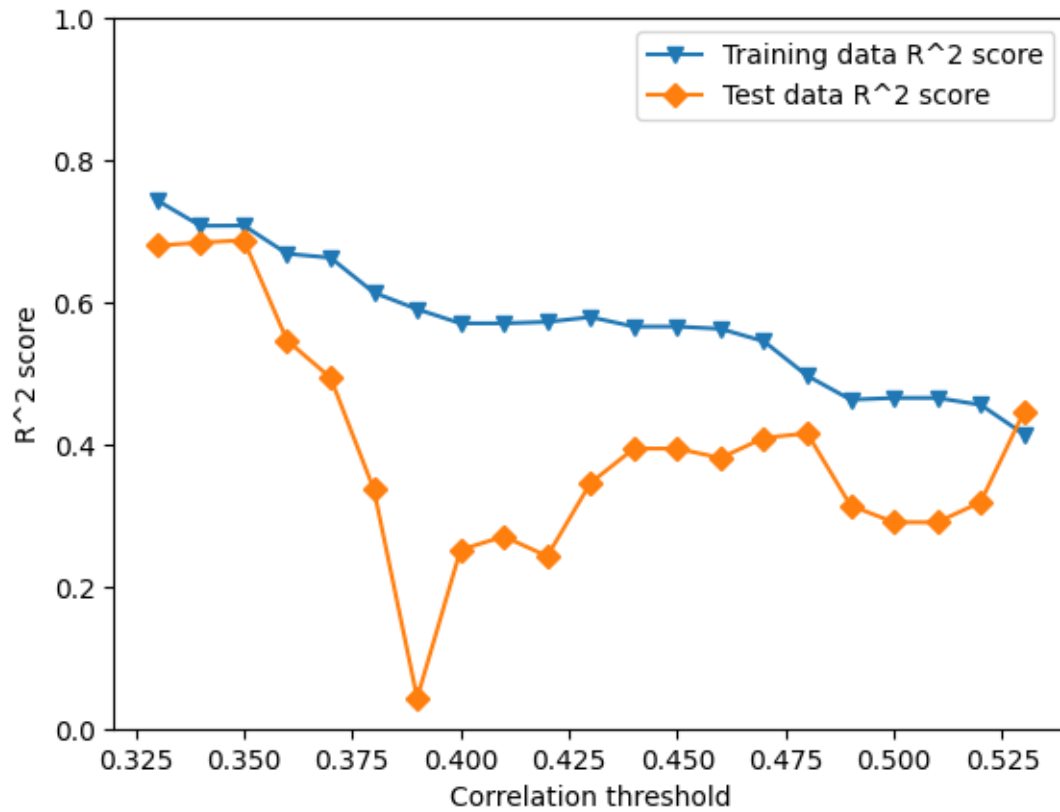

```
[44]: plt.plot(df_without_standardization['Correlation threshold'],
             df_without_standardization['Number of features'], label = "Number of
             features", marker='.')
plt.legend()
plt.xlabel('Correlation threshold')
plt.ylabel('Number of features')
plt.show()
```





### 5.3 Store quality measurements

```
[45]: with pd.ExcelWriter('../Data/Quality_'+str(target)+'_'+str(random_state)+'_'.  
      ↪ 'xlsx') as writer:  
      df_linear.to_excel(writer, sheet_name='MLR')  
      df_decision_tree.to_excel(writer, sheet_name='DT')  
      df_random_forest.to_excel(writer, sheet_name='RF')  
      df_k_nearest.to_excel(writer, sheet_name='KNN')  
      df_svm.to_excel(writer, sheet_name='SVM')
```

# Notebook

January 18, 2024

## 1 File 18

```
[1]: import sys
from pathlib import Path
prediction_mode_path = Path("../module")
sys.path.append(prediction_mode_path.as_posix())
import models_creation as pred_model

import pandas as pd
import numpy as np

from sklearn.metrics import r2_score

import matplotlib.pyplot as plt
from sklearn.tree import plot_tree

from matplotlib import pyplot as plt

import joblib

import warnings
warnings.filterwarnings('ignore')
```

```
[2]: load_prepared_data = pd.read_excel('../Data/Kolchicyna_machine_learning.xlsx')
load_prepared_data = load_prepared_data.drop(columns=['Unnamed: 0'])

target = 'BALB/3T3'

corr_low = 0.33
corr_high = 0.58

random_state = 15
```

```
[3]: load_prepared_data.head()
```

```
[3]:
```

|   | AATSOZ    | AATSOare | AATSOd   | AATSOdv  | AATSOi     | AATSOm    | AATSOp   | \ |
|---|-----------|----------|----------|----------|------------|-----------|----------|---|
| 0 | 25.090909 | 6.046518 | 3.109091 | 6.662626 | 160.775045 | 99.075564 | 1.555512 |   |
| 1 | 24.448276 | 6.008422 | 3.051724 | 6.386973 | 161.021674 | 96.473315 | 1.538471 |   |

|   |           |          |          |          |            |           |          |
|---|-----------|----------|----------|----------|------------|-----------|----------|
| 2 | 23.868852 | 5.974074 | 3.000000 | 6.138434 | 161.244045 | 94.127025 | 1.523105 |
| 3 | 23.868852 | 5.974074 | 3.032787 | 6.171220 | 161.244045 | 94.127025 | 1.523105 |
| 4 | 23.343750 | 5.942945 | 2.953125 | 5.913194 | 161.445569 | 92.000700 | 1.509180 |

|   | AATS0pe  | AATS0s   | AATS0se  | ... | A549_float | MCF-7_float | LoVo_float | \ |
|---|----------|----------|----------|-----|------------|-------------|------------|---|
| 0 | 6.126680 | 3.435416 | 7.629859 | ... | 10.8       | 10.3        | 6.5        |   |
| 1 | 6.088791 | 3.330998 | 7.596891 | ... | 11.6       | 12.0        | 8.5        |   |
| 2 | 6.054630 | 3.236850 | 7.567166 | ... | 10.9       | 12.2        | 8.8        |   |
| 3 | 6.054630 | 3.257798 | 7.567166 | ... | 10.5       | 11.3        | 8.5        |   |
| 4 | 6.023670 | 3.151529 | 7.540228 | ... | 89.5       | 92.7        | 52.8       |   |

|   | LoVo/DX_float | BALB/3T3_float | A549_float_transformed | \ |
|---|---------------|----------------|------------------------|---|
| 0 | 54.9          | 10.2           | 7.966576               |   |
| 1 | 31.1          | 14.3           | 7.935542               |   |
| 2 | 17.9          | 11.7           | 7.962574               |   |
| 3 | 10.2          | 11.0           | 7.978811               |   |
| 4 | 77.8          | 99.4           | 7.048177               |   |

|   | MCF-7_float_transformed | LoVo_float_transformed | LoVo/DX_float_transformed | \ |
|---|-------------------------|------------------------|---------------------------|---|
| 0 | 7.987163                | 8.187087               | 7.260428                  |   |
| 1 | 7.920819                | 8.070581               | 7.507240                  |   |
| 2 | 7.913640                | 8.055517               | 7.747147                  |   |
| 3 | 7.946922                | 8.070581               | 7.991400                  |   |
| 4 | 7.032920                | 7.277366               | 7.109020                  |   |

|   | BALB/3T3_float_transformed |
|---|----------------------------|
| 0 | 7.991400                   |
| 1 | 7.844664                   |
| 2 | 7.931814                   |
| 3 | 7.958607                   |
| 4 | 7.002614                   |

[5 rows x 1221 columns]

```
[4]: data = load_prepared_data[list(load_prepared_data.columns)[0:-10]]
data[target] = load_prepared_data[load_prepared_data.columns[-1]]
data.head()
```

|   | AATS0Z    | AATS0are | AATS0d   | AATS0dv  | AATS0i     | AATS0m    | AATS0p   | \ |
|---|-----------|----------|----------|----------|------------|-----------|----------|---|
| 0 | 25.090909 | 6.046518 | 3.109091 | 6.662626 | 160.775045 | 99.075564 | 1.555512 |   |
| 1 | 24.448276 | 6.008422 | 3.051724 | 6.386973 | 161.021674 | 96.473315 | 1.538471 |   |
| 2 | 23.868852 | 5.974074 | 3.000000 | 6.138434 | 161.244045 | 94.127025 | 1.523105 |   |
| 3 | 23.868852 | 5.974074 | 3.032787 | 6.171220 | 161.244045 | 94.127025 | 1.523105 |   |
| 4 | 23.343750 | 5.942945 | 2.953125 | 5.913194 | 161.445569 | 92.000700 | 1.509180 |   |

|   | AATS0pe  | AATS0s   | AATS0se  | ... | piPC10   | piPC2    | piPC3    | piPC4    | \ |
|---|----------|----------|----------|-----|----------|----------|----------|----------|---|
| 0 | 6.126680 | 3.435416 | 7.629859 | ... | 7.999655 | 4.266195 | 4.915408 | 5.516700 |   |

|   |          |          |          |     |          |          |          |          |
|---|----------|----------|----------|-----|----------|----------|----------|----------|
| 1 | 6.088791 | 3.330998 | 7.596891 | ... | 8.018726 | 4.280132 | 4.922714 | 5.520711 |
| 2 | 6.054630 | 3.236850 | 7.567166 | ... | 8.028799 | 4.293878 | 4.929967 | 5.524706 |
| 3 | 6.054630 | 3.257798 | 7.567166 | ... | 8.037440 | 4.307438 | 4.929967 | 5.524706 |
| 4 | 6.023670 | 3.151529 | 7.540228 | ... | 8.034892 | 4.307438 | 4.937168 | 5.528685 |

|   | piPC5    | piPC6    | piPC7    | piPC8    | piPC9    | BALB/3T3 |
|---|----------|----------|----------|----------|----------|----------|
| 0 | 6.098566 | 6.595759 | 6.979116 | 7.337313 | 7.681445 | 7.991400 |
| 1 | 6.103048 | 6.601209 | 6.985613 | 7.349442 | 7.695531 | 7.844664 |
| 2 | 6.105281 | 6.603923 | 6.989306 | 7.353932 | 7.704023 | 7.931814 |
| 3 | 6.107510 | 6.606629 | 6.992068 | 7.361425 | 7.709420 | 7.958607 |
| 4 | 6.107510 | 6.605277 | 6.991148 | 7.356489 | 7.707175 | 7.002614 |

[5 rows x 1212 columns]

## 2 Multiple Linear regression (MLR)

```
[5]: without_standardization, train_r2_, test_r2_, hist1, hist2, target_column_name,
      ↪ training_data_RMSE, test_data_RMSE = pred_model.
      ↪ prepare_data_and_create_model(molecular_descriptors_df=data,
      ↪
      ↪ correlation_threshold=0.5,
      ↪
      ↪ standardization=False,
      ↪
      ↪ model_type='linear_model',
      ↪
      ↪ target_column_name = str(target),
      ↪
      ↪ random_state=random_state,
      ↪
      ↪ train_test_split_=True,
      ↪
      ↪ verbose=True)
```

I am not doing standardization...

|   | molecular descriptor name |            |
|---|---------------------------|------------|
| 0 | AATS0Z                    |            |
| 1 | AATS0are                  |            |
| 2 | AATS0d                    |            |
| 3 | AATS0dv                   |            |
| 4 | AATS0i                    |            |
|   | molecular descriptor name | corr_value |
| 0 | AATS0Z                    | -0.020817  |
| 1 | AATS0are                  | -0.148257  |
| 2 | AATS0d                    | 0.022999   |
| 3 | AATS0dv                   | -0.137980  |

|     |                           |            |                            |
|-----|---------------------------|------------|----------------------------|
| 4   | AATSOi                    | 0.133257   |                            |
|     | molecular descriptor name | corr_value | absolute correlation value |
| 0   | AATSOZ                    | -0.020817  | 0.020817                   |
| 1   | AATSOare                  | -0.148257  | 0.148257                   |
| 2   | AATSOd                    | 0.022999   | 0.022999                   |
| 3   | AATSOdv                   | -0.137980  | 0.137980                   |
| 4   | AATSOi                    | 0.133257   | 0.133257                   |
|     | molecular descriptor name | corr_value | absolute correlation value |
| 226 | AMID_0                    | -0.546843  | 0.546843                   |
| 505 | EState_VSA5               | -0.588780  | 0.588780                   |
| 556 | GATS2c                    | 0.511671   | 0.511671                   |
| 791 | MDEO-12                   | -0.582747  | 0.582747                   |
| 847 | NdO                       | -0.500462  | 0.500462                   |
|     | molecular descriptor name | corr_value | absolute correlation value |
| 226 | AMID_0                    | -0.546843  | 0.546843                   |
| 505 | EState_VSA5               | -0.588780  | 0.588780                   |
| 556 | GATS2c                    | 0.511671   | 0.511671                   |
| 791 | MDEO-12                   | -0.582747  | 0.582747                   |
| 847 | NdO                       | -0.500462  | 0.500462                   |

The model used is: LinearReg..

Return the coefficient of determination of the prediction:

0.6569499487893375

R<sup>2</sup> score: 0.5256266081134505

Correlation coefficient: 0.7250011090429107

Test data - unseen during training:

R<sup>2</sup> score: 0.6569499487893375

Correlation coefficient: 0.8105244899380509

[7.68442489 6.0649563 7.07776757 7.44460786 7.76758116 8.09501827  
8.03694771 7.82654221 7.91029739 7.46021396 6.76908355 7.56147833  
7.34978659 7.70817837 8.0526055 8.02027016 6.2746389 5.67578807]  
102 7.698970  
38 5.986741  
8 5.984515  
109 7.886057  
11 7.962574  
51 7.698970  
88 8.229148  
21 7.298432  
82 8.065502  
98 7.376751  
58 7.602060  
64 8.060481  
74 7.853872  
103 7.853872  
91 8.346787  
43 7.619789  
25 4.989276  
30 6.085657

Name: BALB/3T3, dtype: float64  
Training Root Mean Square Error: 0.5976818108840668  
Testing Root Mean Square Error: 0.5386939232139484

```
[6]: print(target_column_name+str('_transformed'))  
      print(hist1[target_column_name].hist())
```

BALB/3T3\_transformed  
AxesSubplot(0.125,0.11;0.775x0.77)

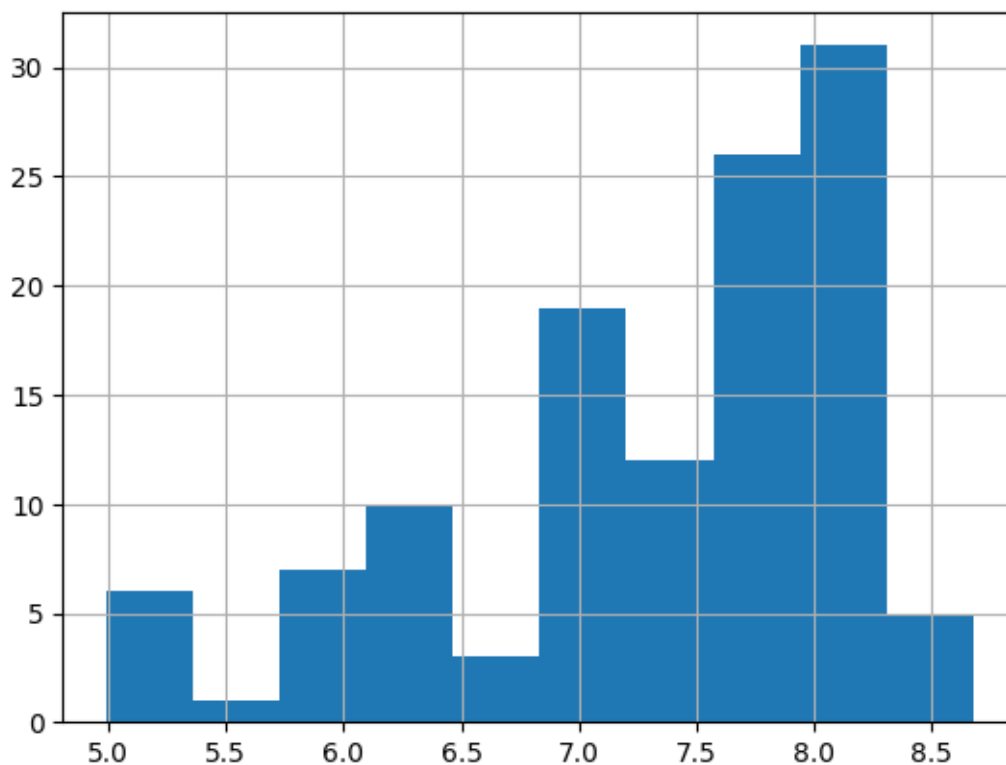

```
[7]: with_standardization, train_r2_, test_r2_, hist1, hist2, target_column_name,   
      ↪ training_data_RMSE, test_data_RMSE = pred_model.  
      ↪ prepare_data_and_create_model(molecular_descriptors_df=data,  
  
      ↪ correlation_threshold=0.50,  
  
      ↪ standardization=True,  
  
      ↪ model_type='linear_model',  
  
      ↪ target_column_name = target,
```

```

↪          random_state=random_state,
↪          train_test_split_=True,
↪          verbose=True)

```

I am doing standardization...

molecular descriptor name

```

0          AATSOZ
1          AATSOare
2          AATSOd
3          AATSOdv
4          AATSOi

```

|   | molecular descriptor name | corr_value |
|---|---------------------------|------------|
| 0 | AATSOZ                    | -0.020817  |
| 1 | AATSOare                  | -0.148257  |
| 2 | AATSOd                    | 0.022999   |
| 3 | AATSOdv                   | -0.137980  |
| 4 | AATSOi                    | 0.133257   |

|   | molecular descriptor name | corr_value | absolute correlation value |
|---|---------------------------|------------|----------------------------|
| 0 | AATSOZ                    | -0.020817  | 0.020817                   |
| 1 | AATSOare                  | -0.148257  | 0.148257                   |
| 2 | AATSOd                    | 0.022999   | 0.022999                   |
| 3 | AATSOdv                   | -0.137980  | 0.137980                   |
| 4 | AATSOi                    | 0.133257   | 0.133257                   |

|     | molecular descriptor name | corr_value | absolute correlation value |
|-----|---------------------------|------------|----------------------------|
| 226 | AMID_0                    | -0.546843  | 0.546843                   |
| 505 | EState_VSA5               | -0.588780  | 0.588780                   |
| 556 | GATS2c                    | 0.511671   | 0.511671                   |
| 791 | MDEO-12                   | -0.582747  | 0.582747                   |
| 847 | NdO                       | -0.500462  | 0.500462                   |

|     | molecular descriptor name | corr_value | absolute correlation value |
|-----|---------------------------|------------|----------------------------|
| 226 | AMID_0                    | -0.546843  | 0.546843                   |
| 505 | EState_VSA5               | -0.588780  | 0.588780                   |
| 556 | GATS2c                    | 0.511671   | 0.511671                   |
| 791 | MDEO-12                   | -0.582747  | 0.582747                   |
| 847 | NdO                       | -0.500462  | 0.500462                   |

The model used is: LinearReg..

Return the coefficient of determination of the prediction:

0.6569499487893375

R<sup>2</sup> score: 0.5256266081134505

Correlation coefficient: 0.7250011090429107

Test data - unseen during training:

R<sup>2</sup> score: 0.6569499487893375

Correlation coefficient: 0.8105244899380509

[7.68442489 6.0649563 7.07776757 7.44460786 7.76758116 8.09501827

```

8.03694771 7.82654221 7.91029739 7.46021396 6.76908355 7.56147833
7.34978659 7.70817837 8.0526055 8.02027016 6.2746389 5.67578807]
102    7.698970
38     5.986741
8      5.984515
109    7.886057
11     7.962574
51     7.698970
88     8.229148
21     7.298432
82     8.065502
98     7.376751
58     7.602060
64     8.060481
74     7.853872
103    7.853872
91     8.346787
43     7.619789
25     4.989276
30     6.085657
Name: BALB/3T3, dtype: float64
Training Root Mean Square Error: 0.5976818108840668
Testing Root Mean Square Error: 0.5386939232139484

```

## 2.1 Search inside correlation space

```

[8]: step = 0.01
initial_step = corr_low
last_step = corr_high
first_list = [x / 100.0 for x in range(int(initial_step*100),
    ↪int(last_step*100), int(step*100))]
second_list = []
third_list = []
fourth_l = []
fifth_l = []
f_list = []
for i in first_list:
    without_standardization, train_r2, test_r2, _, h_, target_column_name,
    ↪training_data_RMSE, test_data_RMSE = pred_model.
    ↪prepare_data_and_create_model(molecular_descriptors_df = data,

    ↪
    ↪correlation_threshold = i,

    ↪
    ↪standardization = False,

    ↪
    ↪model_type = 'linear_model',

```



```

    ↪          target_column_name = target,
    ↪          random_state=random_state,
    ↪          train_test_split_ = True,
    ↪          verbose = False)
second_list.append(train_r2)
third_list.append(test_r2)
fourth_l.append(training_data_RMSE)
fifth_l.append(test_data_RMSE)
f_list.append(len(h_))

```

```

[9]: df_without_standardization = pd.DataFrame(data=first_list,
    ↪columns=["Correlation threshold"])
df_without_standardization['Training data R^2 score'] = second_list
df_without_standardization['Test data R^2 score'] = third_list
df_without_standardization['Training RMSE'] = fourth_l
df_without_standardization['Test RMSE'] = fifth_l
df_without_standardization['Number of features'] = f_list

```

```

[10]: df_linear = df_without_standardization.copy()
df_without_standardization

```

```

[10]:
Correlation threshold  Training data R^2 score  Test data R^2 score  \
0                    0.33                    0.975137            0.067877
1                    0.34                    0.927395            0.385673
2                    0.35                    0.911816            0.807698
3                    0.36                    0.902814            0.791372
4                    0.37                    0.883339            0.764207
5                    0.38                    0.837840            0.662093
6                    0.39                    0.782597            0.642720
7                    0.40                    0.765315            0.640995
8                    0.41                    0.693176            0.790639
9                    0.42                    0.646013            0.760448
10                   0.43                    0.629671            0.739706
11                   0.44                    0.629043            0.727664
12                   0.45                    0.598451            0.683043
13                   0.46                    0.598331            0.684987
14                   0.47                    0.596049            0.683608
15                   0.48                    0.590219            0.703128
16                   0.49                    0.558784            0.684205
17                   0.50                    0.525627            0.656950
18                   0.51                    0.506715            0.653417
19                   0.52                    0.506121            0.648511
20                   0.53                    0.478976            0.639600

```

|    |      |          |          |
|----|------|----------|----------|
| 21 | 0.54 | 0.478976 | 0.639600 |
| 22 | 0.55 | 0.468132 | 0.576754 |
| 23 | 0.56 | 0.468132 | 0.576754 |

|    | Training RMSE | Test RMSE | Number of features |
|----|---------------|-----------|--------------------|
| 0  | 0.136831      | 0.887974  | 83                 |
| 1  | 0.233826      | 0.720880  | 70                 |
| 2  | 0.257694      | 0.403325  | 64                 |
| 3  | 0.270528      | 0.420097  | 59                 |
| 4  | 0.296396      | 0.446610  | 55                 |
| 5  | 0.349447      | 0.534640  | 51                 |
| 6  | 0.404615      | 0.549753  | 46                 |
| 7  | 0.420391      | 0.551078  | 41                 |
| 8  | 0.480678      | 0.420835  | 32                 |
| 9  | 0.516302      | 0.450156  | 28                 |
| 10 | 0.528085      | 0.469240  | 23                 |
| 11 | 0.528532      | 0.479972  | 21                 |
| 12 | 0.549895      | 0.517802  | 17                 |
| 13 | 0.549977      | 0.516212  | 16                 |
| 14 | 0.551536      | 0.517340  | 15                 |
| 15 | 0.555502      | 0.501127  | 14                 |
| 16 | 0.576415      | 0.516852  | 10                 |
| 17 | 0.597682      | 0.538694  | 7                  |
| 18 | 0.609479      | 0.541461  | 6                  |
| 19 | 0.609846      | 0.545280  | 5                  |
| 20 | 0.626381      | 0.552148  | 3                  |
| 21 | 0.626381      | 0.552148  | 3                  |
| 22 | 0.632866      | 0.598356  | 2                  |
| 23 | 0.632866      | 0.598356  | 2                  |

```
[ ]:
```

## 2.2 Plots

```
[11]: plt.plot(df_without_standardization['Correlation threshold'],
             df_without_standardization['Training data R^2 score'], label = "Training
             data R^2 score", marker='v')
plt.plot(df_without_standardization['Correlation threshold'],
             df_without_standardization['Test data R^2 score'], label = "Test data R^2
             score", marker='D')
plt.legend()
plt.xlabel('Correlation threshold')
plt.ylabel('R^2 score')
plt.ylim([0, 1])
plt.show()
```

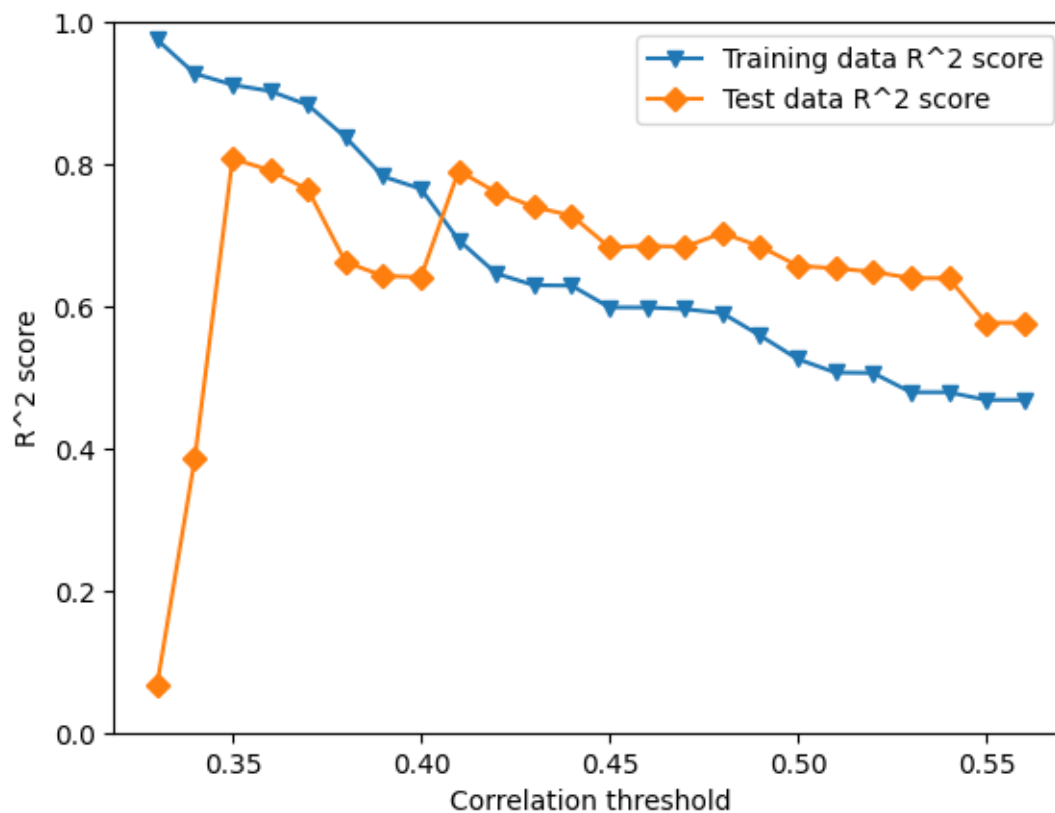

```
[12]: plt.plot(df_without_standardization['Correlation threshold'],  
             df_without_standardization['Number of features'], label = "Number of  
             features", marker='.')  
plt.legend()  
plt.xlabel('Correlation threshold')  
plt.ylabel('Number of features')  
plt.show()
```

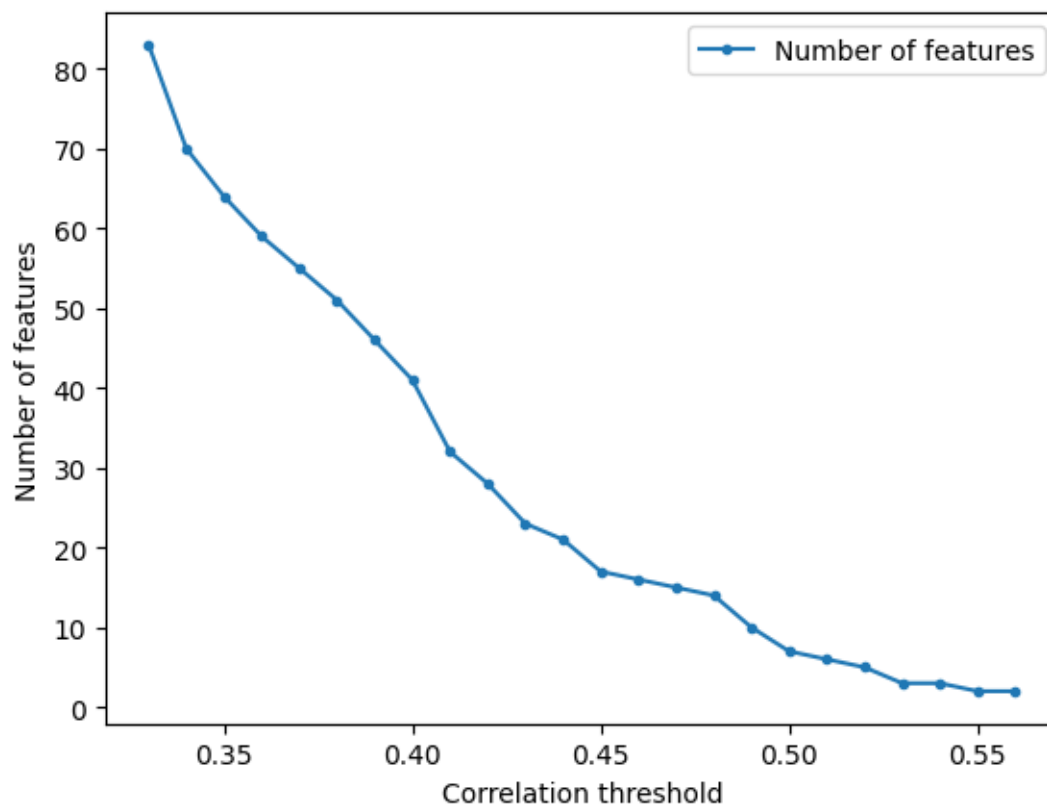

[ ]:

## 2.3 Decision Tree

```
[13]: without_standardization, train_r2_, test_r2_, hist1, hist2, target_column_name,
      ↪ training_data_RMSE, test_data_RMSE = pred_model.
      ↪ prepare_data_and_create_model(molecular_descriptors_df=data,
      ↪
      ↪         correlation_threshold=0.50,
      ↪
      ↪         standardization=False,
      ↪
      ↪         model_type='DecisionTreeRegressor',
      ↪
      ↪         max_depth=5,
      ↪
      ↪         target_column_name = target,
      ↪
      ↪         random_state=random_state,
```

```

↪          train_test_split_=True,
↪          verbose=True)

```

I am not doing standardization...

|   | molecular descriptor name |  |
|---|---------------------------|--|
| 0 | AATSOZ                    |  |
| 1 | AATSOare                  |  |
| 2 | AATSOd                    |  |
| 3 | AATSOdv                   |  |
| 4 | AATSOi                    |  |

  

|   | molecular descriptor name | corr_value |
|---|---------------------------|------------|
| 0 | AATSOZ                    | -0.020817  |
| 1 | AATSOare                  | -0.148257  |
| 2 | AATSOd                    | 0.022999   |
| 3 | AATSOdv                   | -0.137980  |
| 4 | AATSOi                    | 0.133257   |

  

|   | molecular descriptor name | corr_value | absolute correlation value |
|---|---------------------------|------------|----------------------------|
| 0 | AATSOZ                    | -0.020817  | 0.020817                   |
| 1 | AATSOare                  | -0.148257  | 0.148257                   |
| 2 | AATSOd                    | 0.022999   | 0.022999                   |
| 3 | AATSOdv                   | -0.137980  | 0.137980                   |
| 4 | AATSOi                    | 0.133257   | 0.133257                   |

  

|     | molecular descriptor name | corr_value | absolute correlation value |
|-----|---------------------------|------------|----------------------------|
| 226 | AMID_0                    | -0.546843  | 0.546843                   |
| 505 | EState_VSA5               | -0.588780  | 0.588780                   |
| 556 | GATS2c                    | 0.511671   | 0.511671                   |
| 791 | MDEO-12                   | -0.582747  | 0.582747                   |
| 847 | NdO                       | -0.500462  | 0.500462                   |

  

|     | molecular descriptor name | corr_value | absolute correlation value |
|-----|---------------------------|------------|----------------------------|
| 226 | AMID_0                    | -0.546843  | 0.546843                   |
| 505 | EState_VSA5               | -0.588780  | 0.588780                   |
| 556 | GATS2c                    | 0.511671   | 0.511671                   |
| 791 | MDEO-12                   | -0.582747  | 0.582747                   |
| 847 | NdO                       | -0.500462  | 0.500462                   |

The model used is: DecisionTree...

Return the coefficient of determination of the prediction:

0.44183643371267434

R<sup>2</sup> score: 0.8634311625290639

Correlation coefficient: 0.9292099668692022

Test data - unseen during training:

R<sup>2</sup> score: 0.44183643371267434

Correlation coefficient: 0.6647077806921432

[7.69361679 5.9034377 6.79428322 8.07200556 8.07200556 7.13946628  
8.07200556 7.13946628 8.07200556 7.69361679 7.87061249 7.69361679  
7.69361679 7.69361679 7.13946628 8.07200556 7.08460016 5.07789763]  
102 7.698970

```
38      5.986741
8       5.984515
109     7.886057
11      7.962574
51      7.698970
88      8.229148
21      7.298432
82      8.065502
98      7.376751
58      7.602060
64      8.060481
74      7.853872
103     7.853872
91      8.346787
43      7.619789
25      4.989276
30      6.085657
```

```
Name: BALB/3T3, dtype: float64
```

```
Training Root Mean Square Error: 0.3206901974380038
```

```
Testing Root Mean Square Error: 0.6871381711144097
```

```
[14]: print(target_column_name+str('_transformed'))
      print(hist1[target_column_name].hist())
```

```
BALB/3T3_transformed
```

```
AxesSubplot(0.125,0.11;0.775x0.77)
```



```
[15]: with_standardization, train_r2_, test_r2_, hist1, hist2, target_column_name,
      ↪ training_data_RMSE, test_data_RMSE = pred_model.
      ↪ prepare_data_and_create_model(molecular_descriptors_df=data,
      ↪
      ↪         correlation_threshold=0.50,
      ↪
      ↪         standardization=True,
      ↪
      ↪         model_type='DecisionTreeRegressor',
      ↪
      ↪         max_depth=5,
      ↪
      ↪         target_column_name = target,
      ↪
      ↪         random_state=random_state,
      ↪
      ↪         train_test_split_=True,
      ↪
      ↪         verbose=True)
```

I am doing standardization...  
molecular descriptor name

|     |                           |            |                            |
|-----|---------------------------|------------|----------------------------|
| 0   | AATSOZ                    |            |                            |
| 1   | AATSOare                  |            |                            |
| 2   | AATSOd                    |            |                            |
| 3   | AATSOdv                   |            |                            |
| 4   | AATSOi                    |            |                            |
|     | molecular descriptor name | corr_value |                            |
| 0   | AATSOZ                    | -0.020817  |                            |
| 1   | AATSOare                  | -0.148257  |                            |
| 2   | AATSOd                    | 0.022999   |                            |
| 3   | AATSOdv                   | -0.137980  |                            |
| 4   | AATSOi                    | 0.133257   |                            |
|     | molecular descriptor name | corr_value | absolute correlation value |
| 0   | AATSOZ                    | -0.020817  | 0.020817                   |
| 1   | AATSOare                  | -0.148257  | 0.148257                   |
| 2   | AATSOd                    | 0.022999   | 0.022999                   |
| 3   | AATSOdv                   | -0.137980  | 0.137980                   |
| 4   | AATSOi                    | 0.133257   | 0.133257                   |
|     | molecular descriptor name | corr_value | absolute correlation value |
| 226 | AMID_O                    | -0.546843  | 0.546843                   |
| 505 | EState_VSA5               | -0.588780  | 0.588780                   |
| 556 | GATS2c                    | 0.511671   | 0.511671                   |
| 791 | MDEO-12                   | -0.582747  | 0.582747                   |
| 847 | NdO                       | -0.500462  | 0.500462                   |
|     | molecular descriptor name | corr_value | absolute correlation value |
| 226 | AMID_O                    | -0.546843  | 0.546843                   |
| 505 | EState_VSA5               | -0.588780  | 0.588780                   |
| 556 | GATS2c                    | 0.511671   | 0.511671                   |
| 791 | MDEO-12                   | -0.582747  | 0.582747                   |
| 847 | NdO                       | -0.500462  | 0.500462                   |

The model used is: DecisionTree...

Return the coefficient of determination of the prediction:  
0.44183643371267434

R<sup>2</sup> score: 0.8634311625290639

Correlation coefficient: 0.9292099668692022

Test data - unseen during training:  
R<sup>2</sup> score: 0.44183643371267434

Correlation coefficient: 0.6647077806921432

[7.69361679 5.9034377 6.79428322 8.07200556 8.07200556 7.13946628  
8.07200556 7.13946628 8.07200556 7.69361679 7.87061249 7.69361679  
7.69361679 7.69361679 7.13946628 8.07200556 7.08460016 5.07789763]

102 7.698970

38 5.986741

8 5.984515

109 7.886057

11 7.962574

51 7.698970

88 8.229148

21 7.298432



```

82      8.065502
98      7.376751
58      7.602060
64      8.060481
74      7.853872
103     7.853872
91      8.346787
43      7.619789
25      4.989276
30      6.085657

```

Name: BALB/3T3, dtype: float64

Training Root Mean Square Error: 0.3206901974380038

Testing Root Mean Square Error: 0.6871381711144097

## 2.4 Search inside correlation space

```

[16]: step = 0.01
initial_step = corr_low
last_step = corr_high
first_list = [x / 100.0 for x in range(int(initial_step*100),
    ↳ int(last_step*100), int(step*100))]
max_depth = [range(2, 30, 1)]
corr_th = []
second_list = []
third_list = []
fourth_l = []
fifth_l = []
f_list = []
fif_list = []
for i in first_list:
    for depth in max_depth[0]:

        without_standardization, train_r2, test_r2, _, h_, target_column_name,
    ↳ training_data_RMSE, test_data_RMSE = pred_model.
    ↳ prepare_data_and_create_model(molecular_descriptors_df=data,

    ↳                                     correlation_threshold=i,
    ↳                                     standardization=False,
    ↳                                     model_type='DecisionTreeRegressor',
    ↳                                     max_depth=depth,
    ↳                                     target_column_name = target,
    ↳                                     random_state=random_state,

```

```

↪          train_test_split_=True,
↪          verbose=False)
    corr_th.append(i)
    second_list.append(train_r2)
    third_list.append(test_r2)
    fourth_l.append(training_data_RMSE)
    fifth_l.append(test_data_RMSE)
    f_list.append(len(h_))
    fif_list.append(depth)

```

```

[17]: df_without_standardization = pd.DataFrame(data=corr_th, columns=["Correlation_
↪threshold"])
df_without_standardization['Training data R^2 score'] = second_list
df_without_standardization['Test data R^2 score'] = third_list
df_without_standardization['Training RMSE'] = fourth_l
df_without_standardization['Test RMSE'] = fifth_l
df_without_standardization['Number of features'] = f_list
df_without_standardization['Depth number'] = fif_list

```

```

[18]: df_decision_tree = df_without_standardization.copy()
#df_without_standardization.to_excel('../Data/
↪A549_Decision_tree_rs_'+str(random_state)+'.xlsx')

```

## 2.5 Plots

```
[19]: corre_list = [x / 100.0 for x in range(int(initial_step*100),
    ↪int(last_step*100), int(0.01*100))]
for element in corre_list:
    element_ =
    ↪df_without_standardization[df_without_standardization['Correlation_
    ↪threshold'] == float(element)]
    plt.plot(element_['Depth number'], element_['Training data R^2 score'],
    ↪label = "Training data R^2 score", marker='v')
    plt.plot(element_['Depth number'], element_['Test data R^2 score'], label =
    ↪"Test data R^2 score", marker='D')
    plt.legend()
    plt.xlabel('Depth number -> correlation threshold: '+str(element)+'.' \n
    ↪Number of features: '+str(element_['Number of features'].iloc[0]),
    ↪fontweight='bold')
    plt.xlim(max(element_['Depth number'])+1, min(element_['Depth number'])-1)
    plt.ylabel('R^2 score')
    plt.ylim([0, 1])
    plt.rc('grid', linestyle="-.", color='black')
    plt.grid(True)
    plt.show()
```

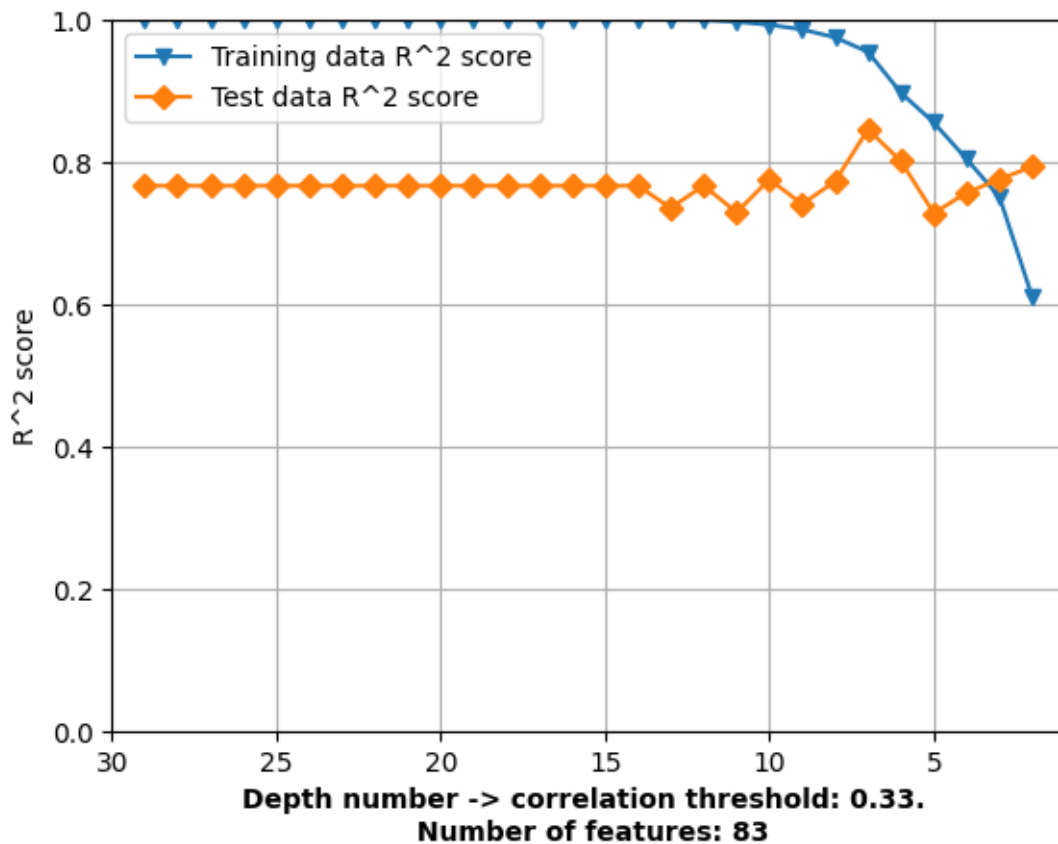

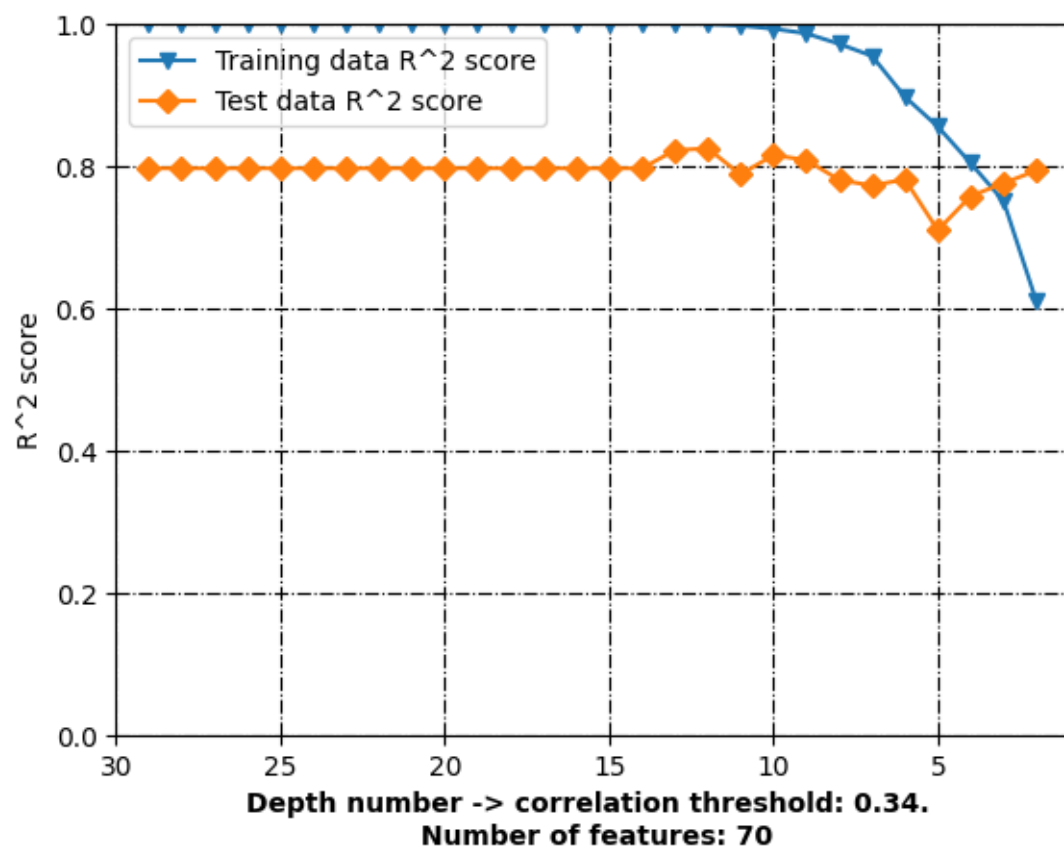

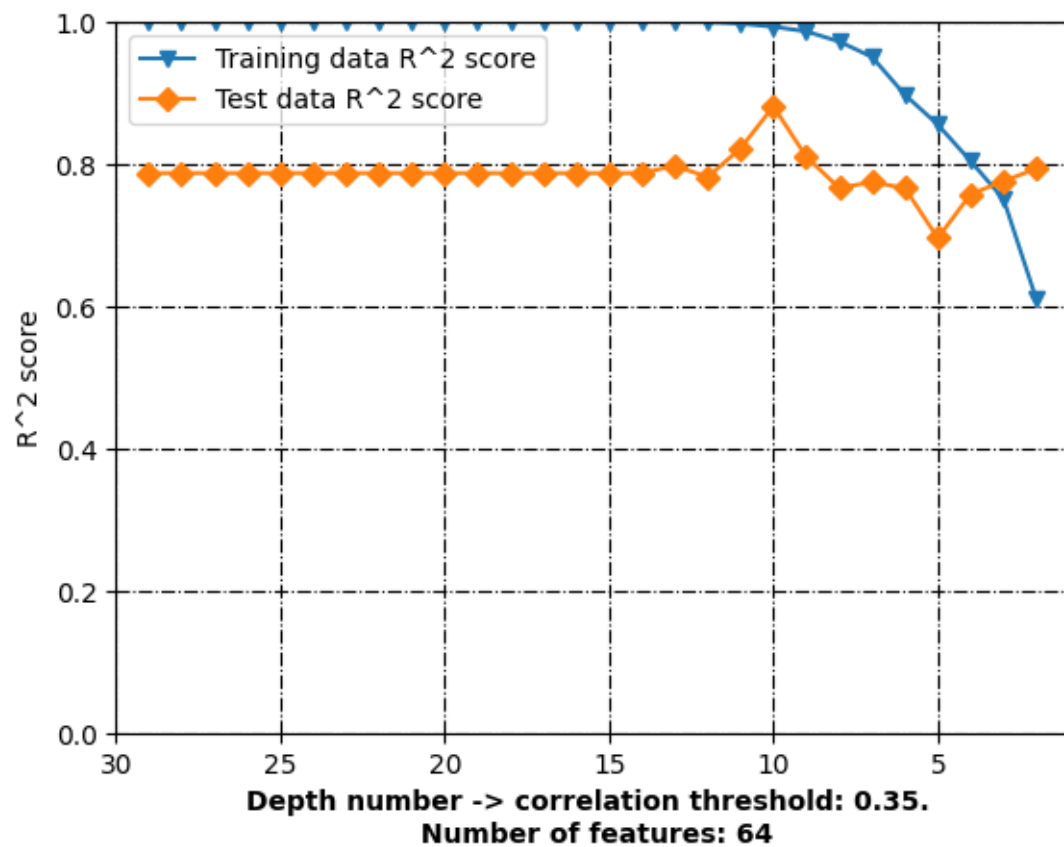

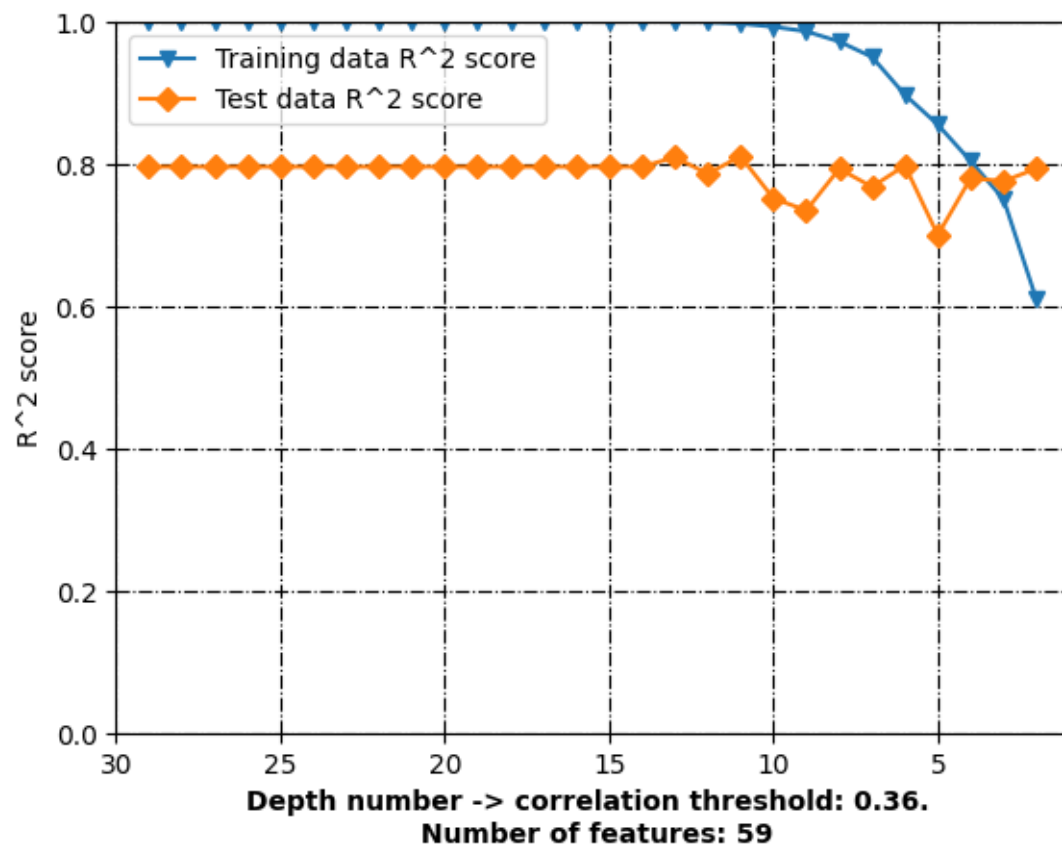

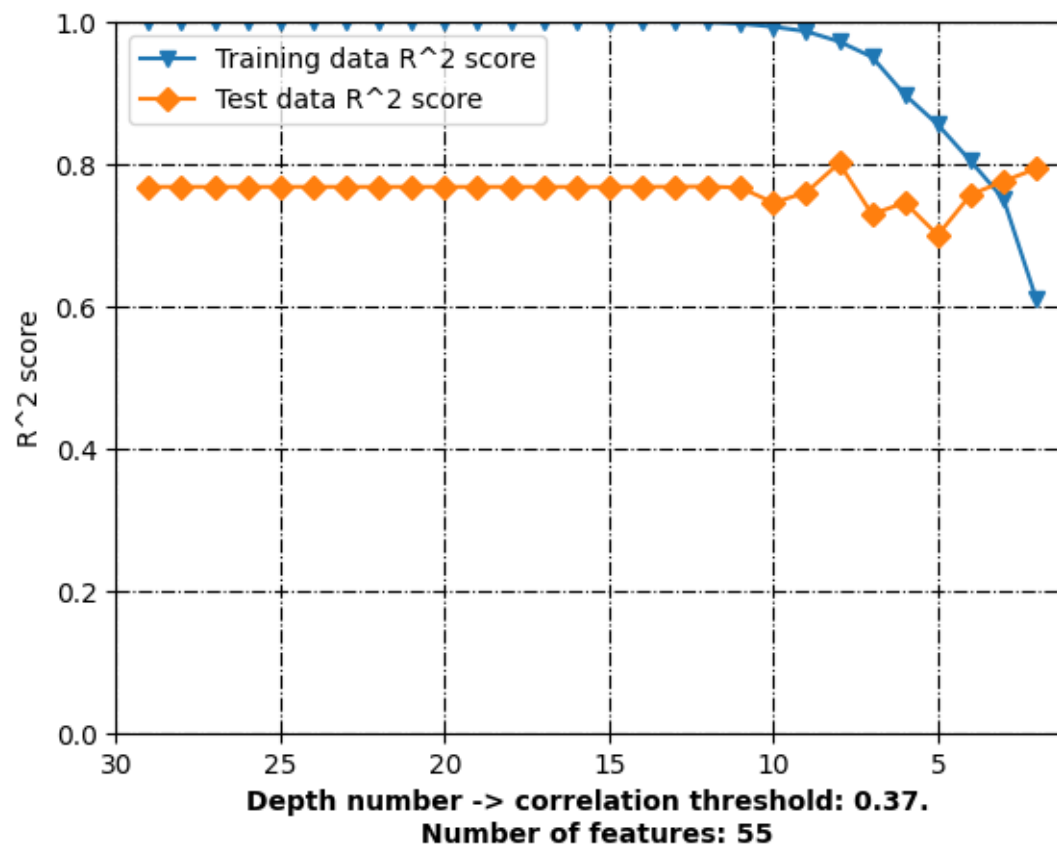

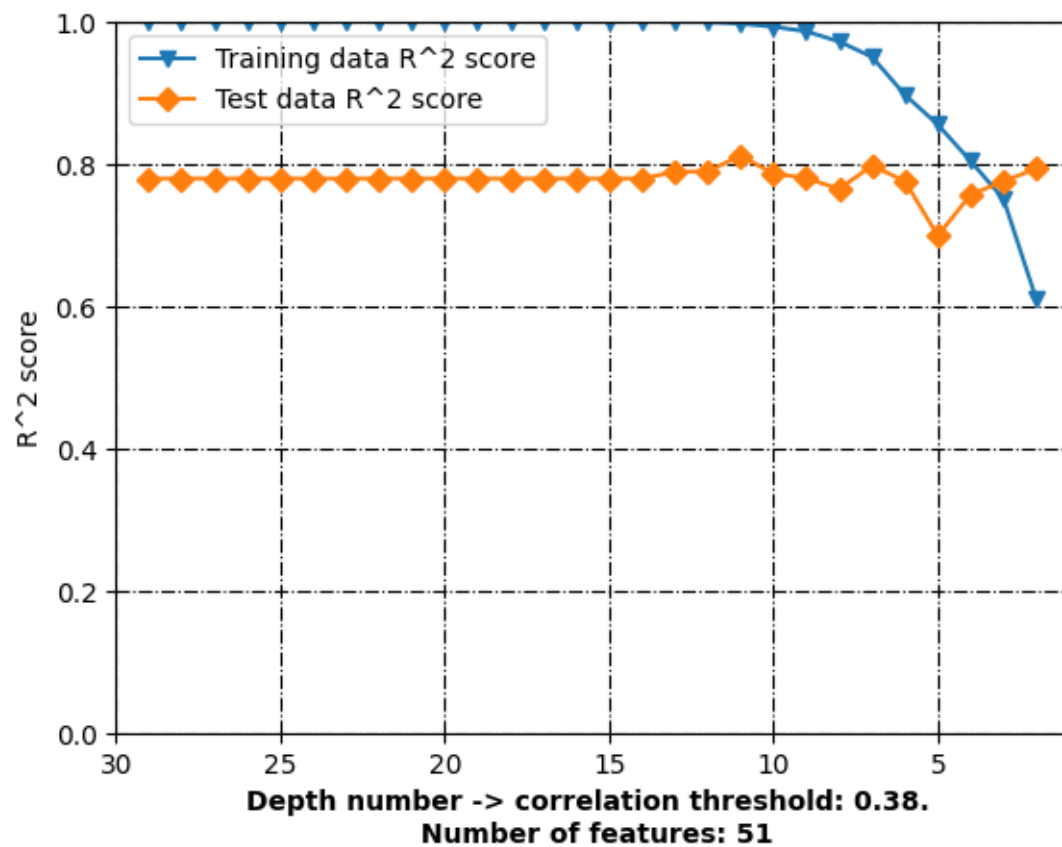



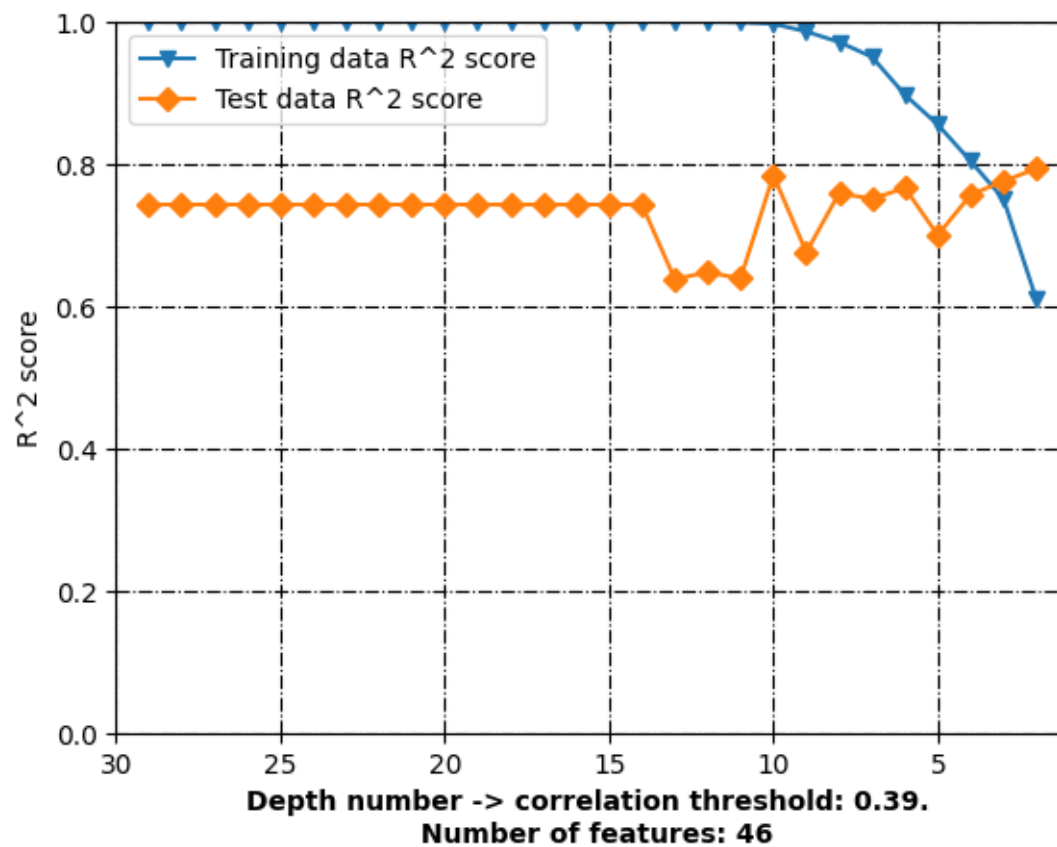

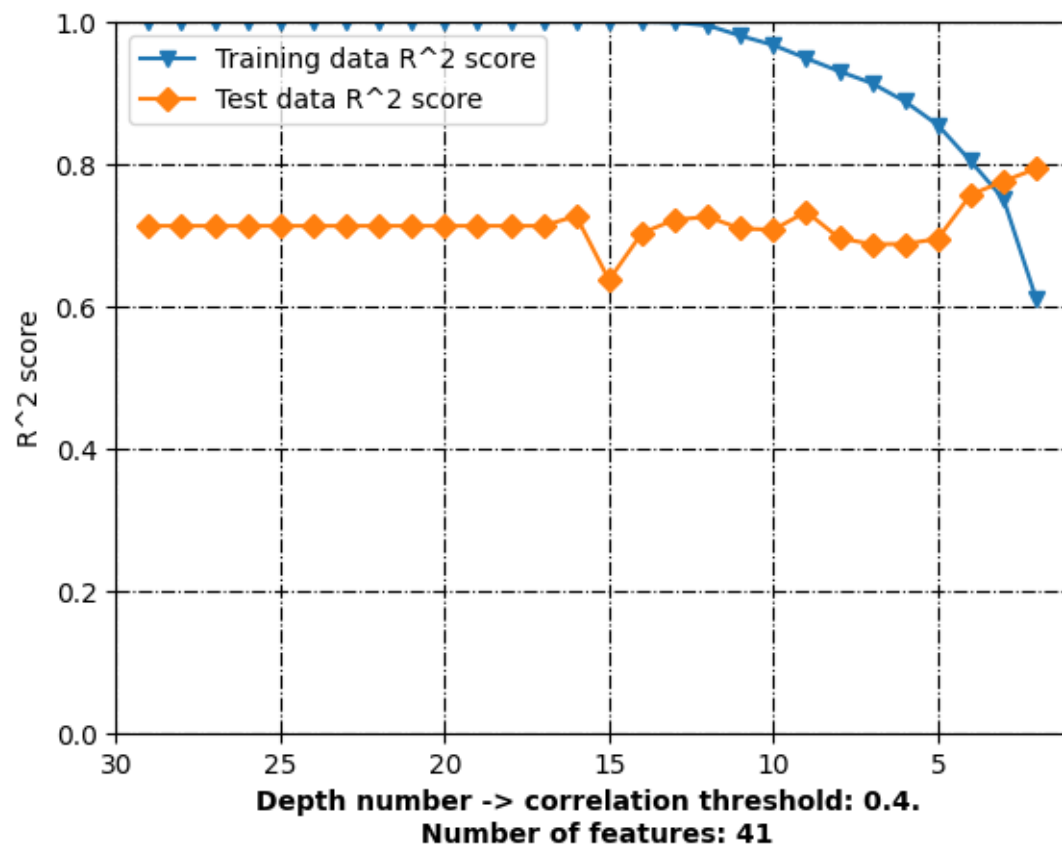

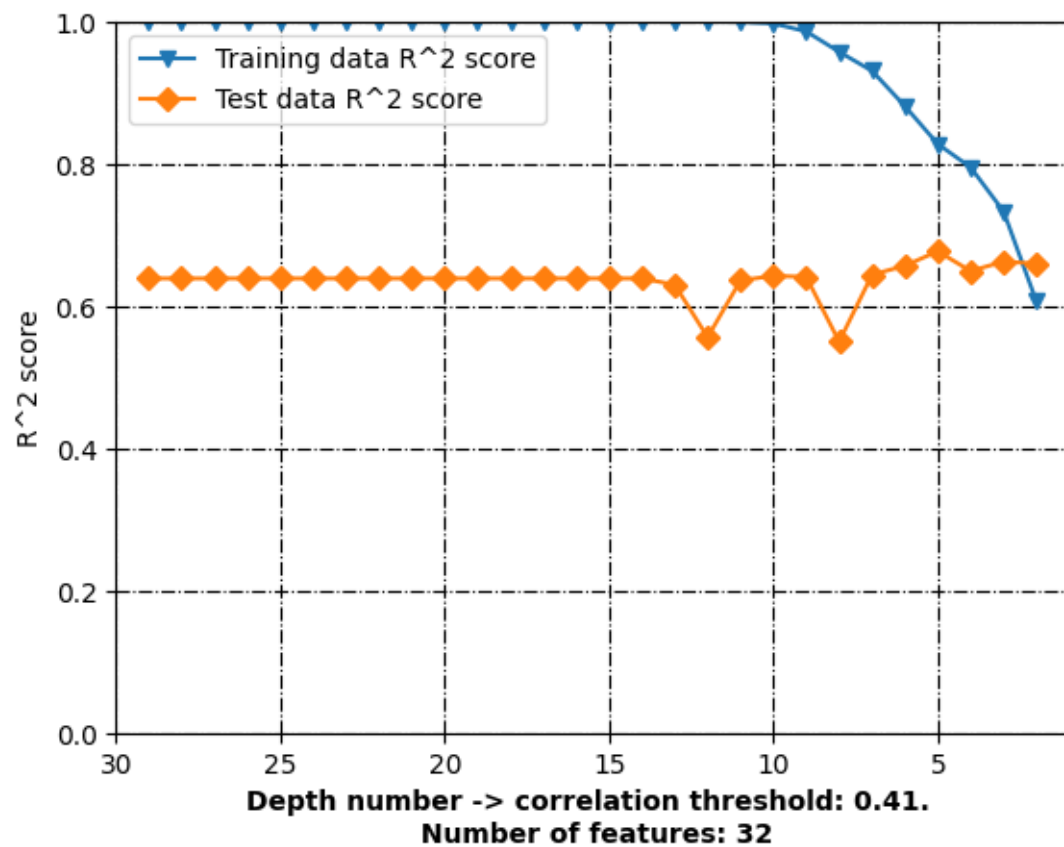

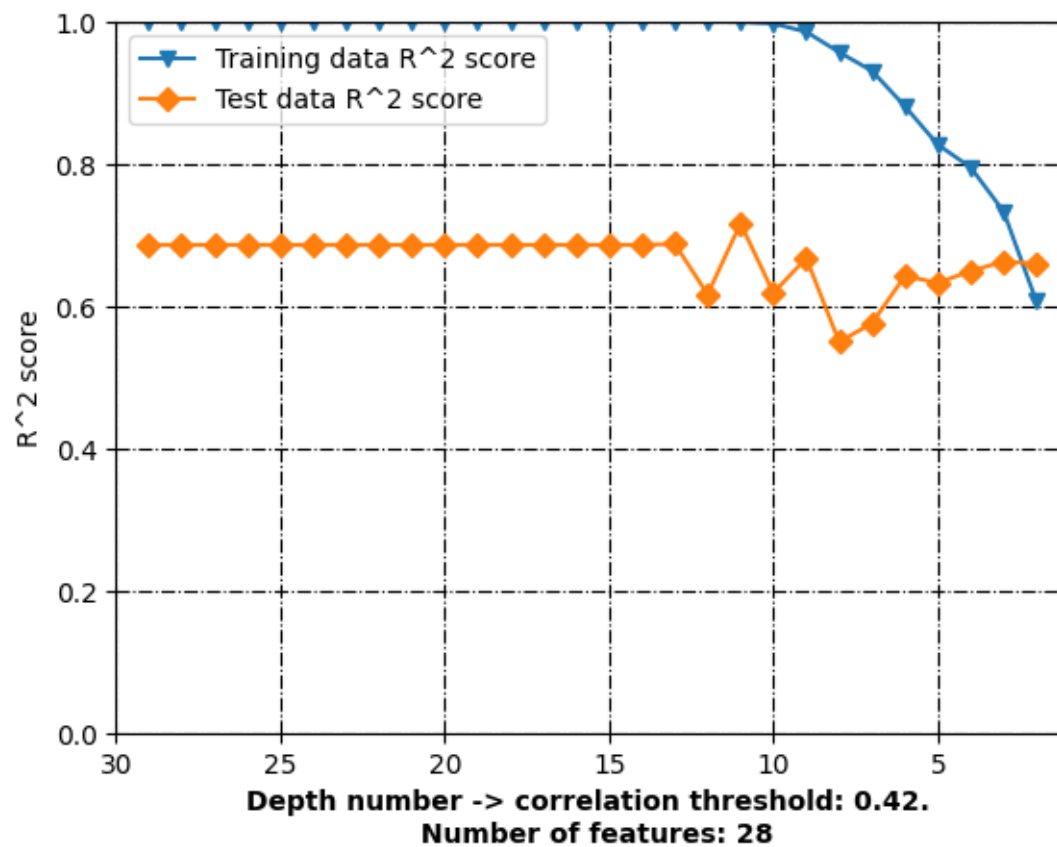

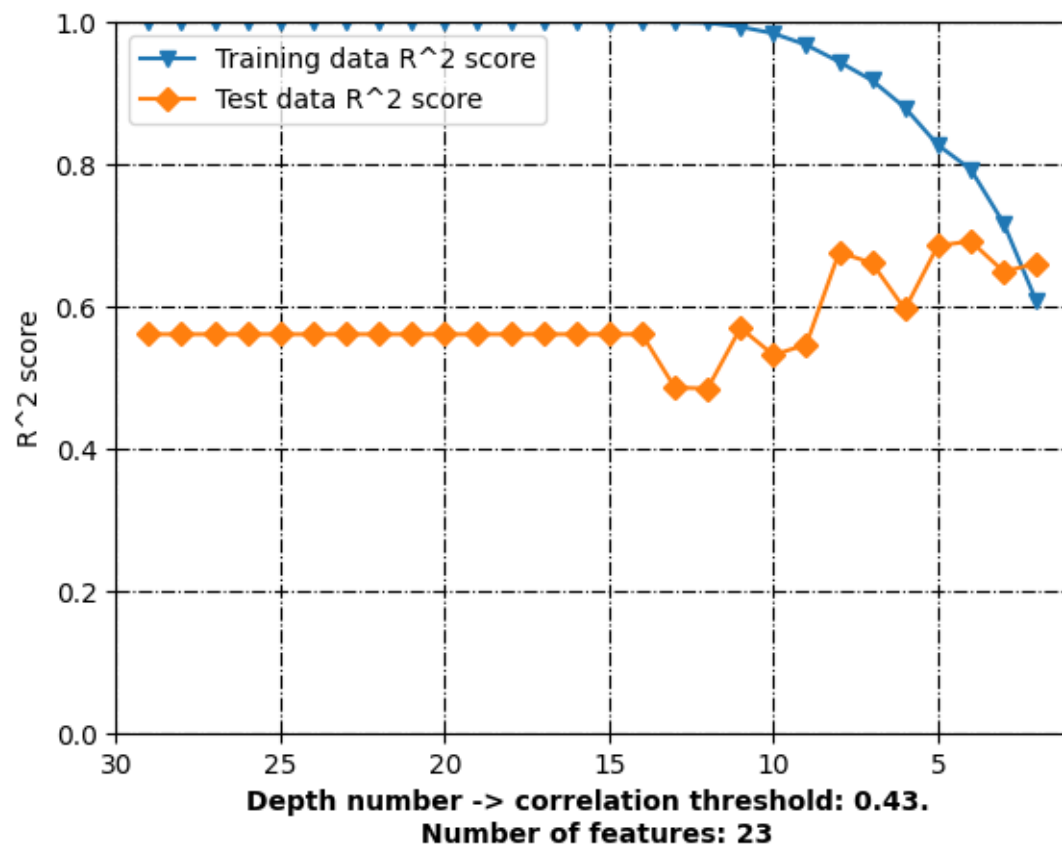

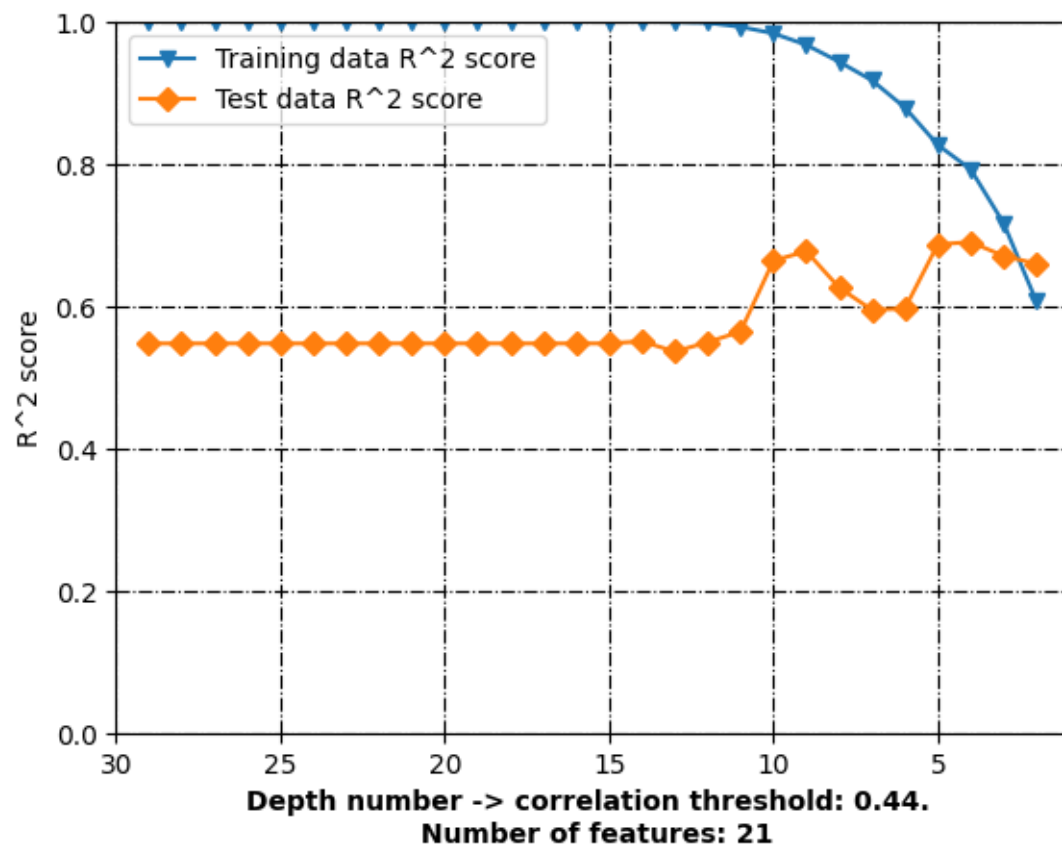

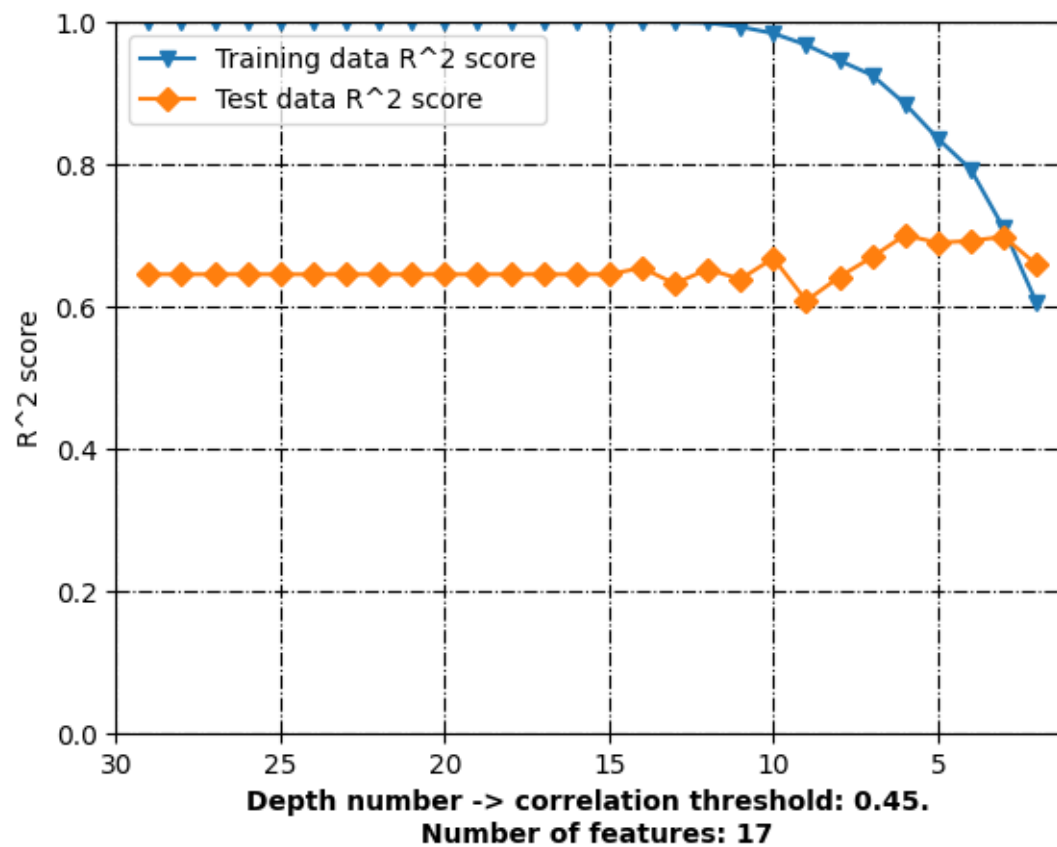

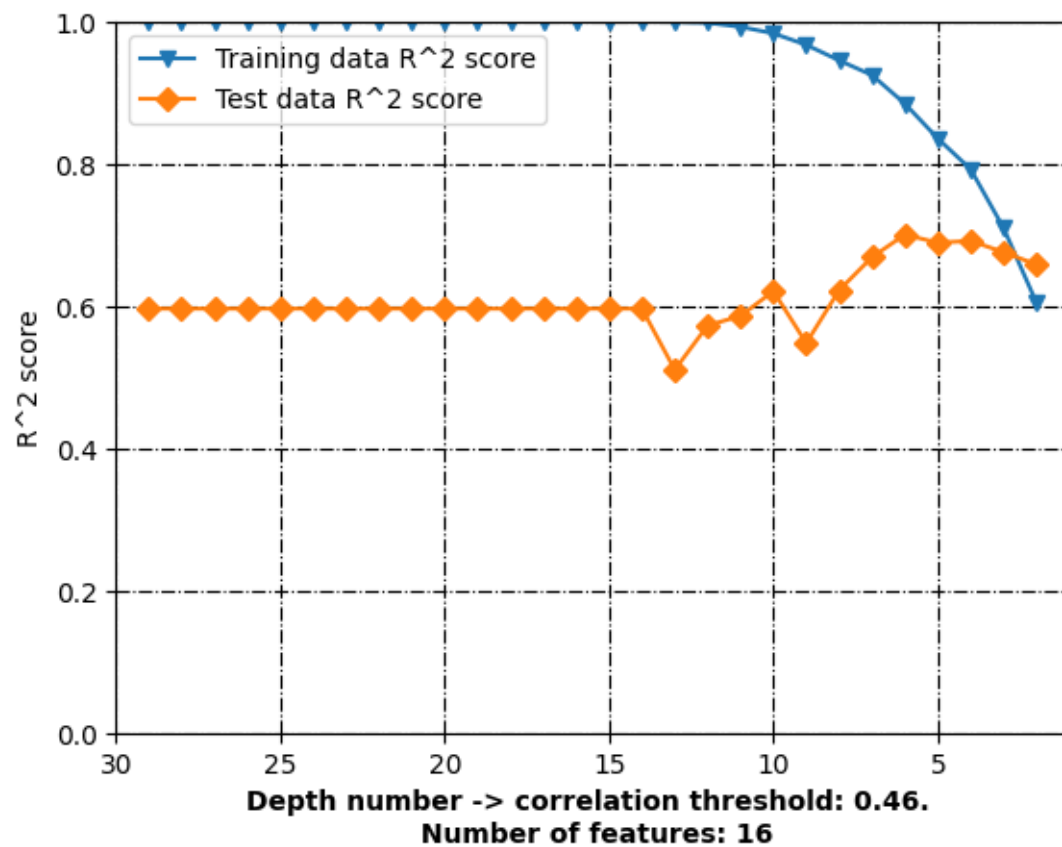



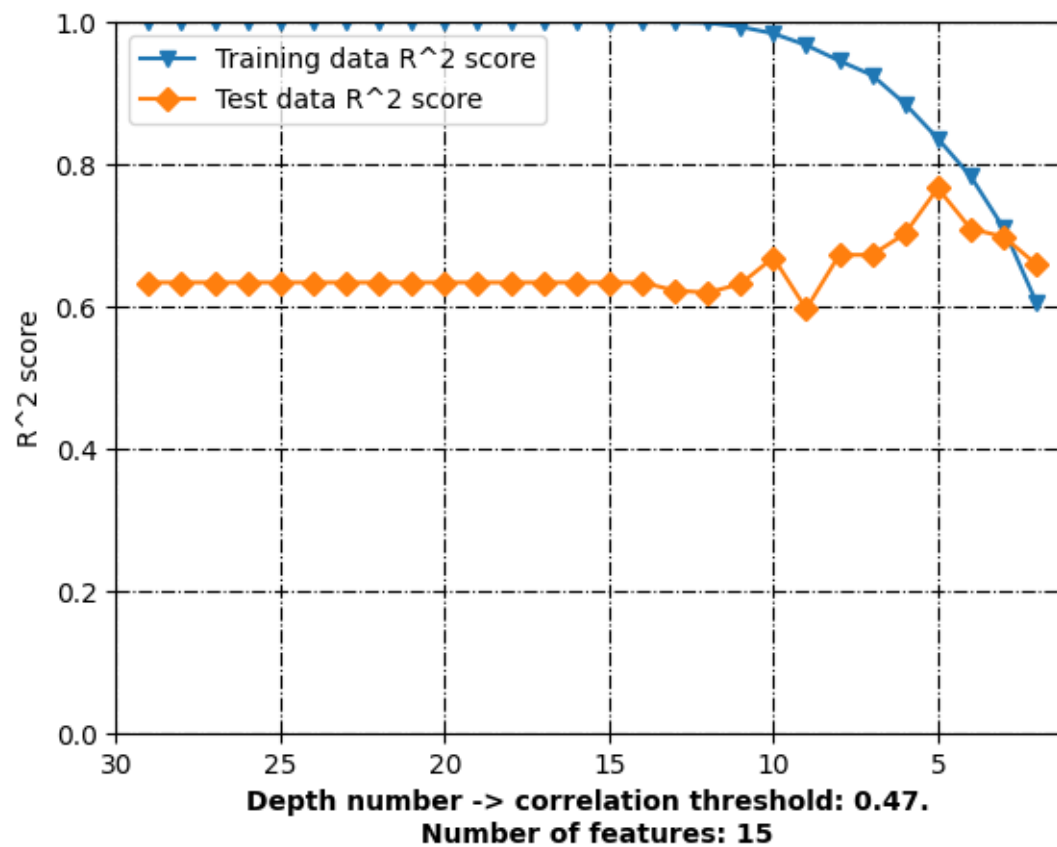

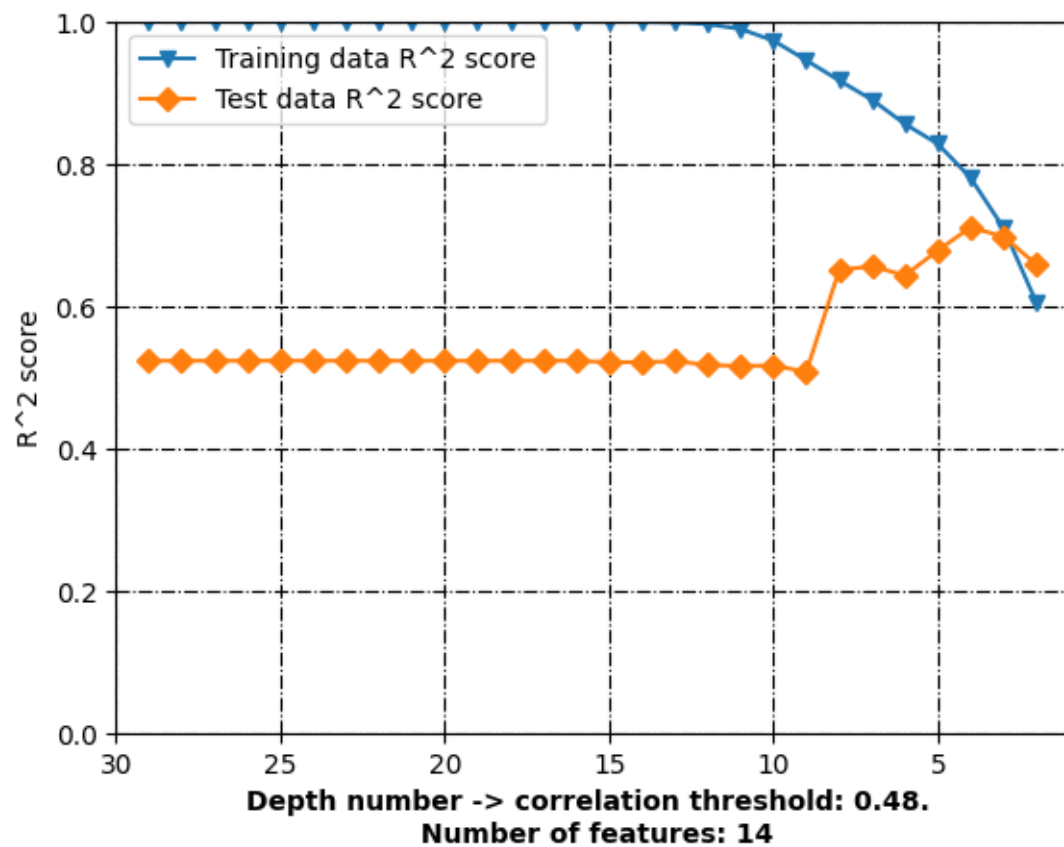

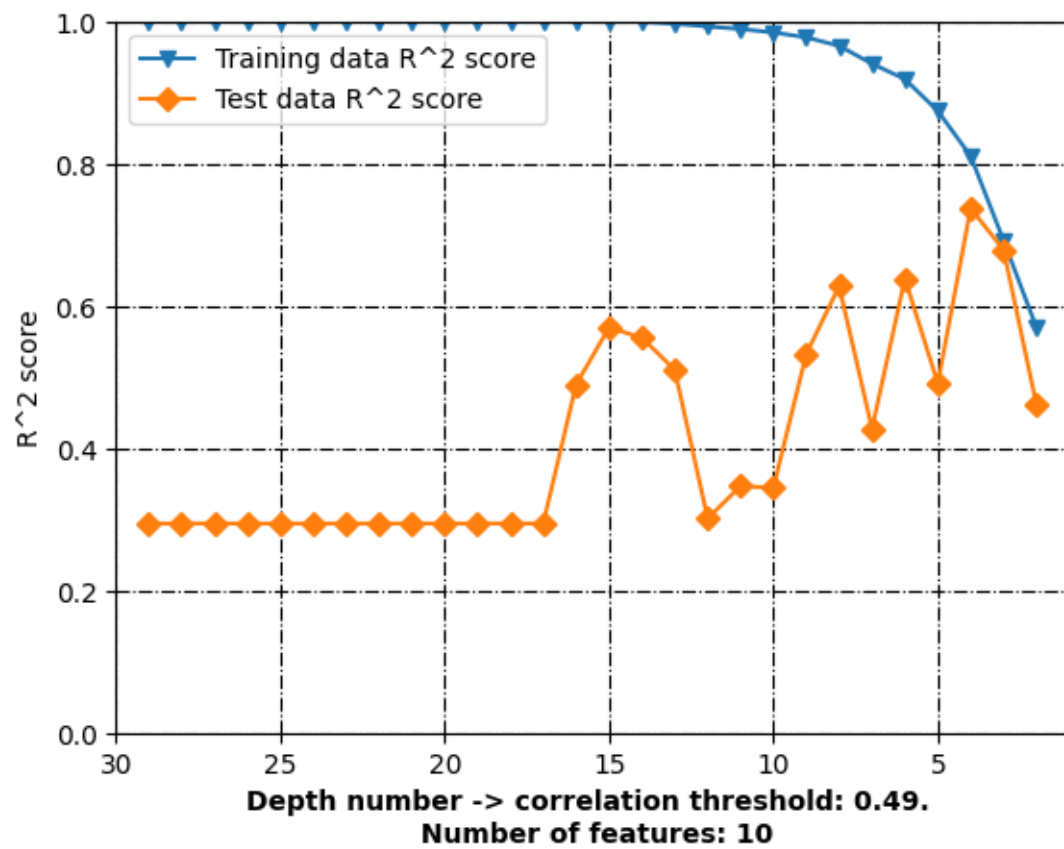

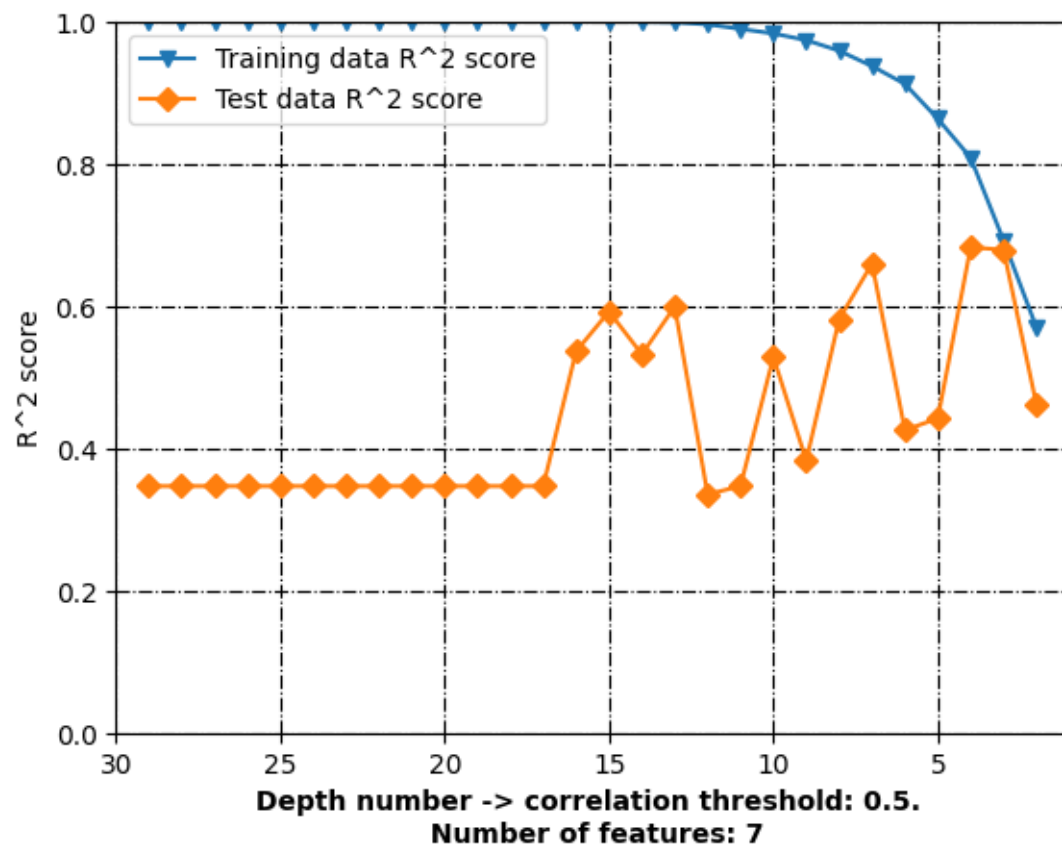

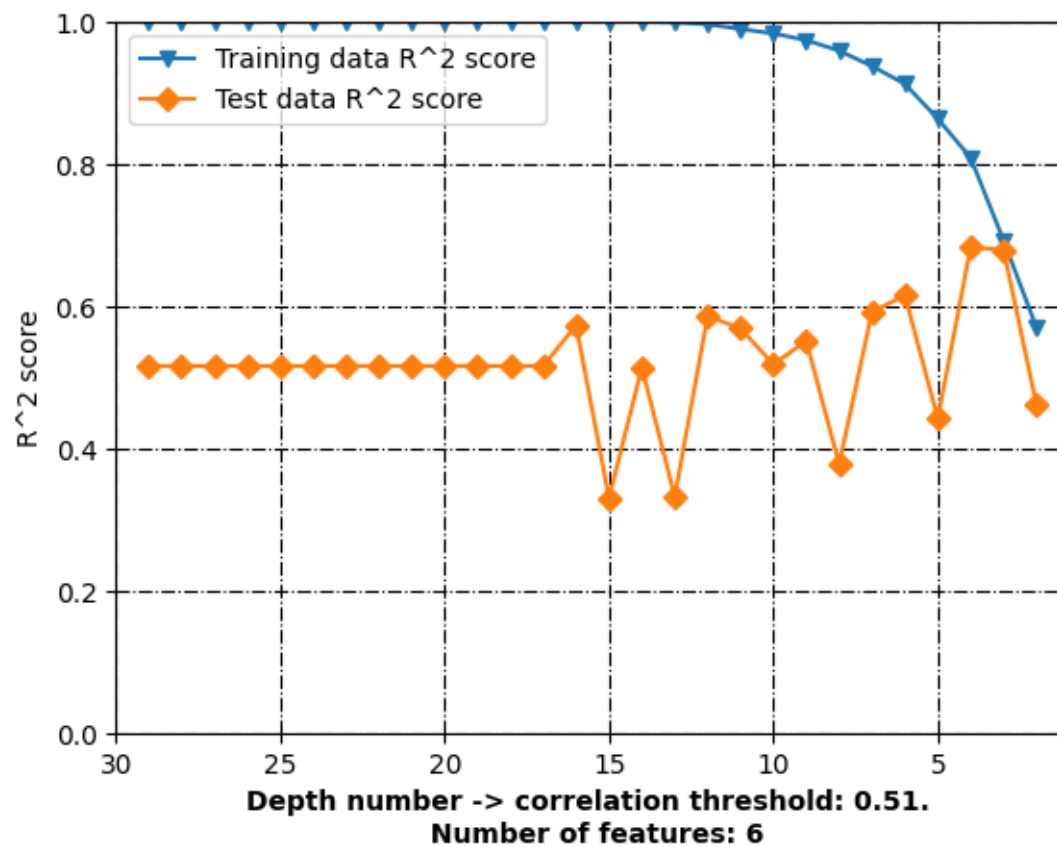

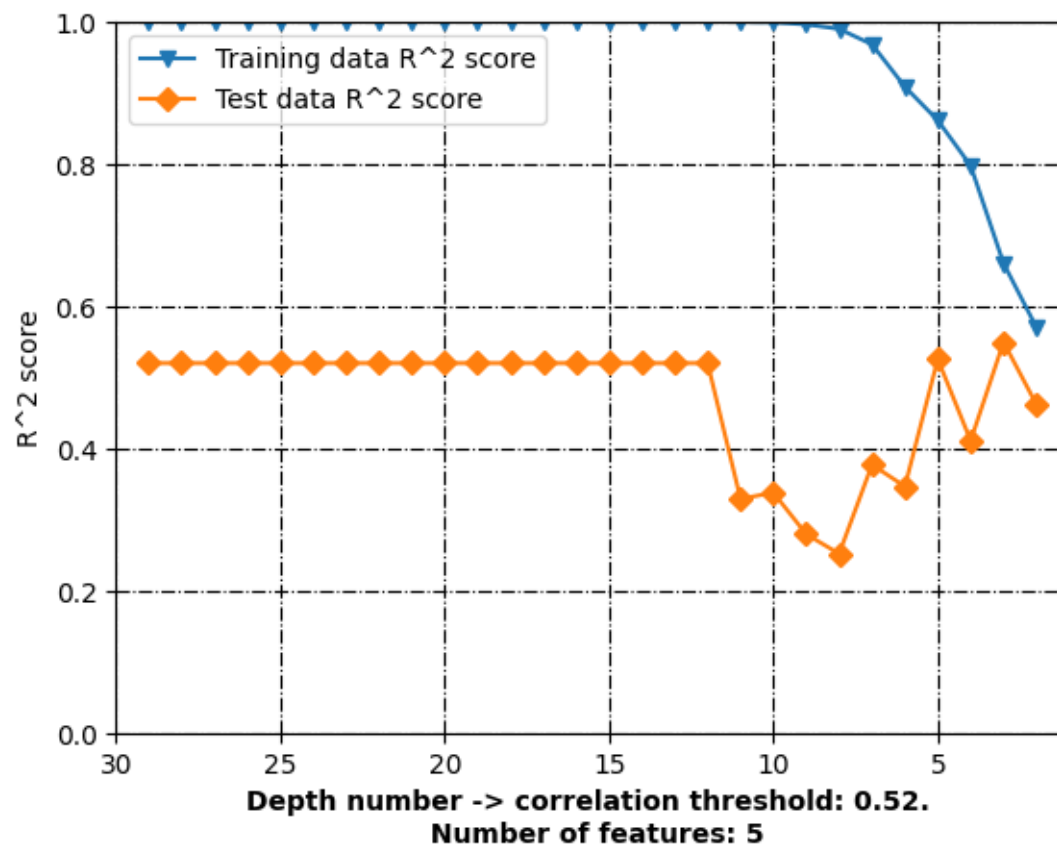

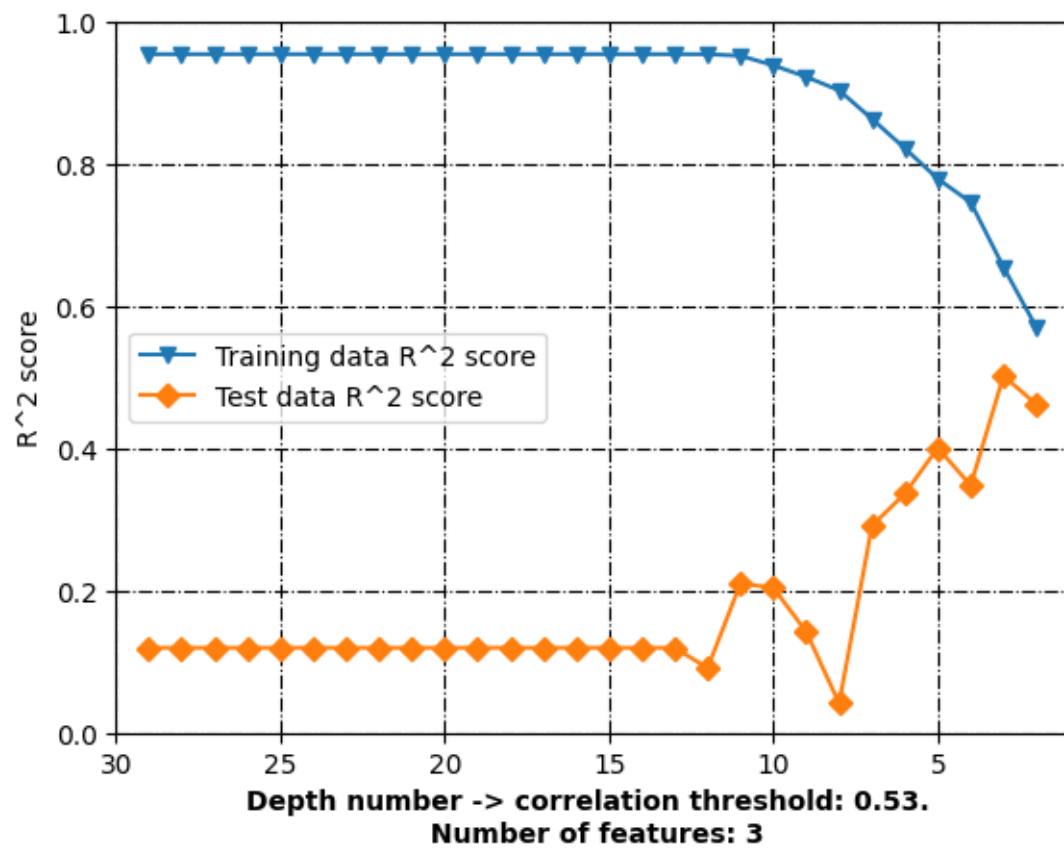

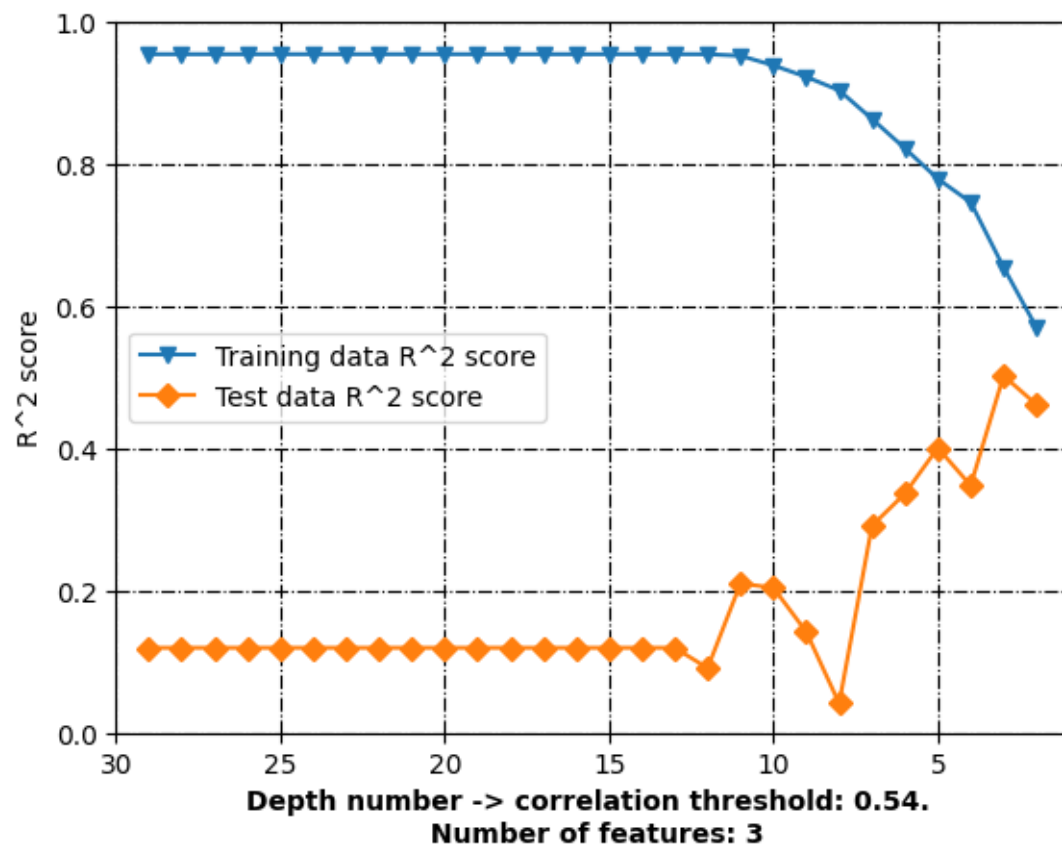



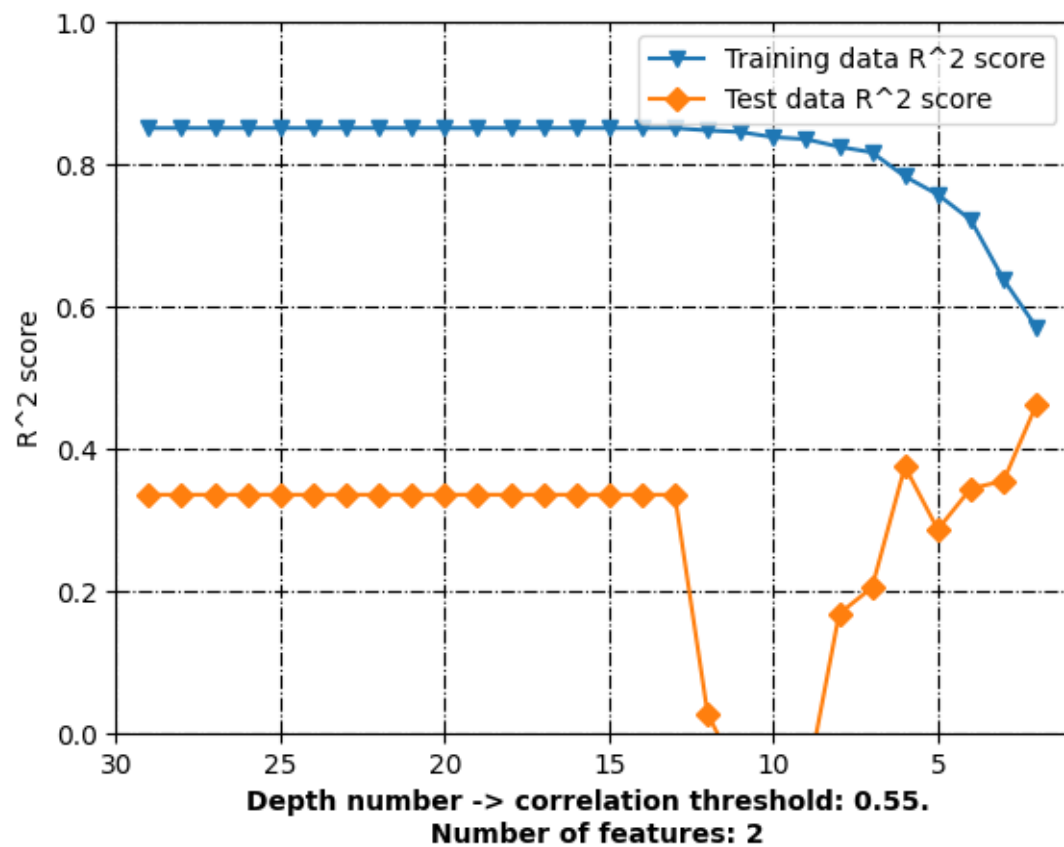

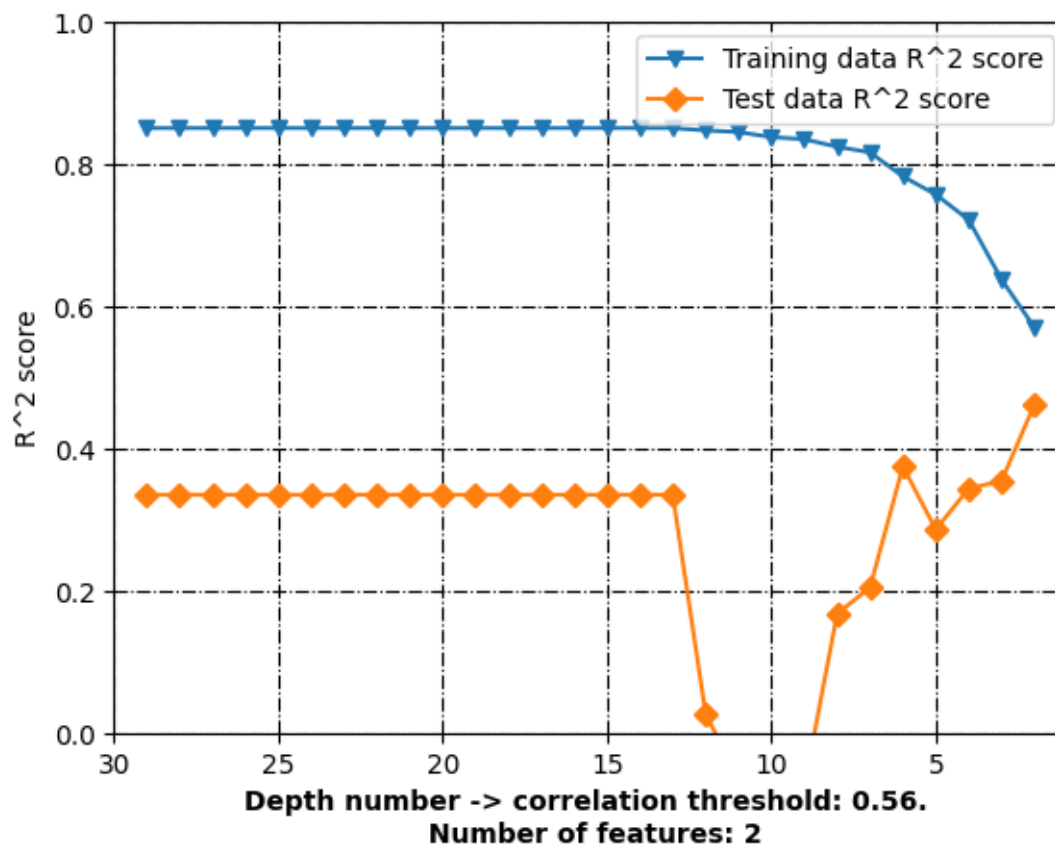

```
[20]: plt.plot(df_without_standardization['Correlation threshold'],  
             df_without_standardization['Number of features'], label = "Number of  
             features", marker='.')  
plt.legend()  
plt.xlabel('Correlation threshold')  
plt.ylabel('Number of features')  
plt.show()
```

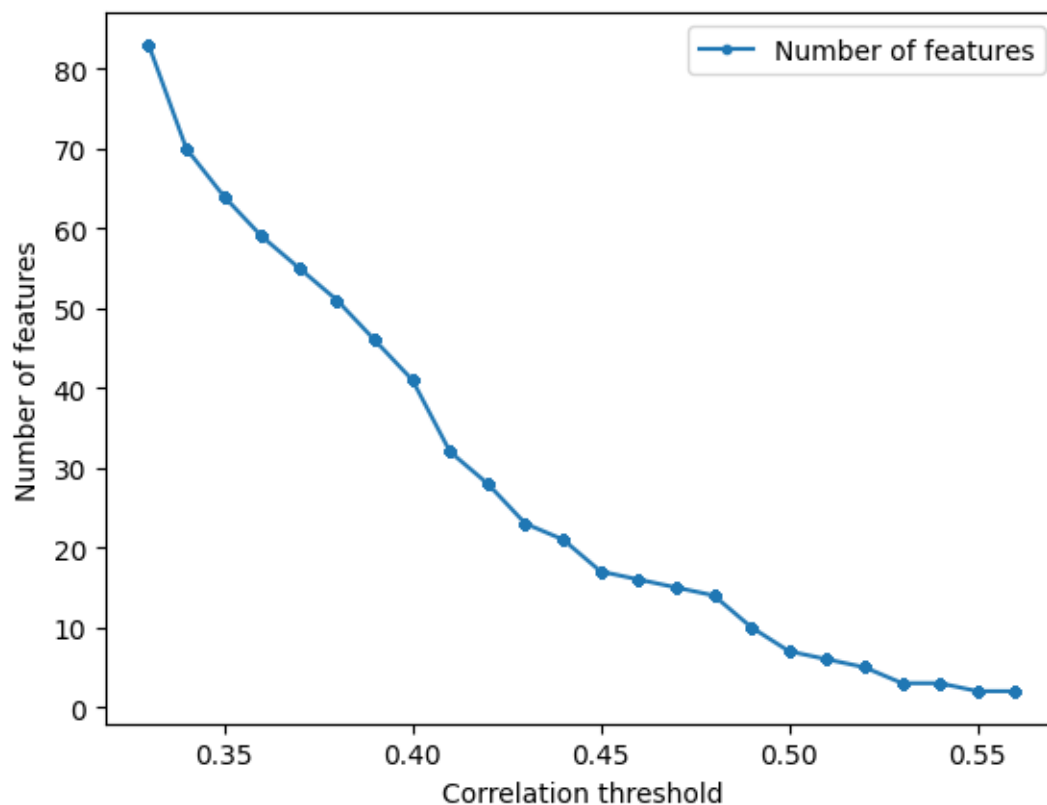

[ ]:

### 3 Random Forest

```
[21]: without_standardization, train_r2_, test_r2_, hist1, hist2, target_column_name,
      ↪ training_data_RMSE, test_data_RMSE = pred_model.
      ↪ prepare_data_and_create_model(molecular_descriptors_df=data,
      ↪
      ↪         correlation_threshold=0.50,
      ↪
      ↪         standardization=False,
      ↪
      ↪         model_type='RandomForestRegressor',
      ↪
      ↪         n_estimators=12,
      ↪
      ↪         target_column_name = target,
      ↪
      ↪         random_state=random_state,
```

```

↪          train_test_split_=True,
↪          verbose=True)

```

I am not doing standardization...

```

molecular descriptor name
0          AATSOZ
1          AATSOare
2          AATSOd
3          AATSOdv
4          AATSOi
molecular descriptor name  corr_value
0          AATSOZ      -0.020817
1          AATSOare    -0.148257
2          AATSOd      0.022999
3          AATSOdv     -0.137980
4          AATSOi      0.133257
molecular descriptor name  corr_value  absolute correlation value
0          AATSOZ      -0.020817          0.020817
1          AATSOare    -0.148257          0.148257
2          AATSOd      0.022999          0.022999
3          AATSOdv     -0.137980          0.137980
4          AATSOi      0.133257          0.133257
molecular descriptor name  corr_value  absolute correlation value
226          AMID_0     -0.546843          0.546843
505          EState_VSA5 -0.588780          0.588780
556          GATS2c      0.511671          0.511671
791          MDEO-12    -0.582747          0.582747
847          NdO        -0.500462          0.500462
molecular descriptor name  corr_value  absolute correlation value
226          AMID_0     -0.546843          0.546843
505          EState_VSA5 -0.588780          0.588780
556          GATS2c      0.511671          0.511671
791          MDEO-12    -0.582747          0.582747
847          NdO        -0.500462          0.500462
The model used is: RandomForest...
Return the coefficient of determination of the prediction:
0.6983472822308948
R^2 score: 0.9235215940349127
Correlation coefficient: 0.9610003090711848
Test data - unseen during training:
R^2 score: 0.6983472822308948
Correlation coefficient: 0.8356717550754571
[7.69834533 5.99736567 7.15163236 7.95490249 7.95796914 7.32280321
 7.97736763 7.1930782 7.99854953 7.86380064 7.25260105 7.86053838
 7.93833005 7.74918107 7.41523265 7.84509988 6.18122122 5.58676987]
102      7.698970

```

```
38      5.986741
8       5.984515
109     7.886057
11      7.962574
51      7.698970
88      8.229148
21      7.298432
82      8.065502
98      7.376751
58      7.602060
64      8.060481
74      7.853872
103     7.853872
91      8.346787
43      7.619789
25      4.989276
30      6.085657
```

```
Name: BALB/3T3, dtype: float64
```

```
Training Root Mean Square Error: 0.23998234483228884
```

```
Testing Root Mean Square Error: 0.5051460408205187
```

```
[22]: print(target_column_name+str('_transformed'))
      print(hist1[target_column_name].hist())
```

```
BALB/3T3_transformed
```

```
AxesSubplot(0.125,0.11;0.775x0.77)
```

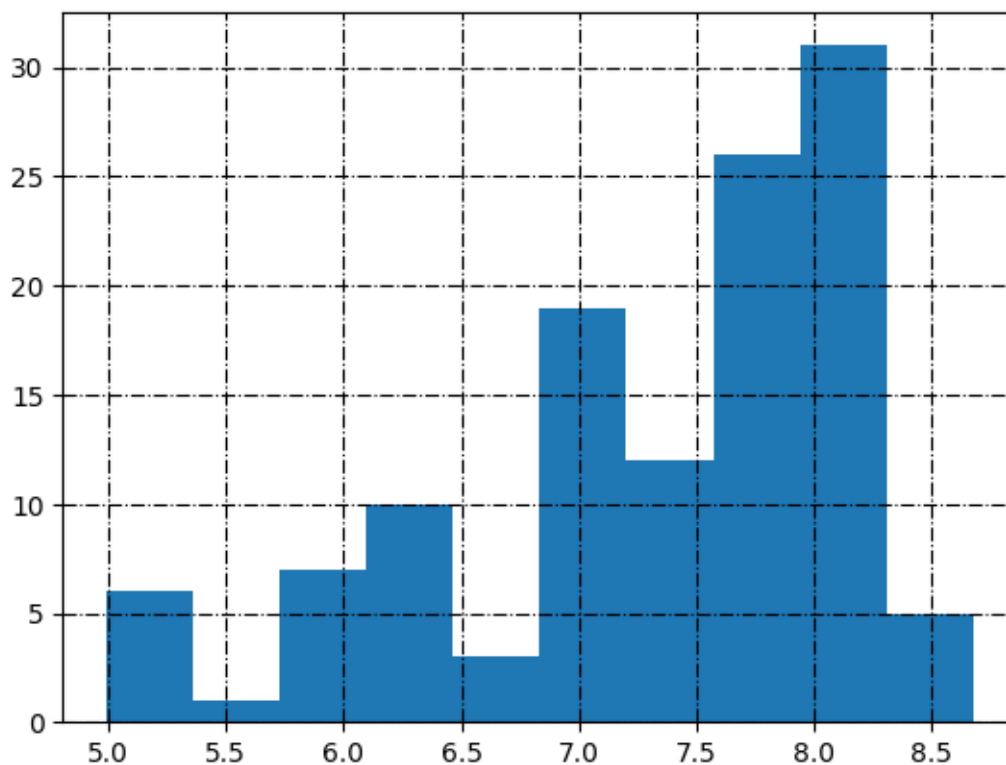

```
[23]: with_standardization, train_r2_, test_r2_, hist1, hist2, target_column_name,
      ↪ training_data_RMSE, test_data_RMSE = pred_model.
      ↪ prepare_data_and_create_model(molecular_descriptors_df=data,
      ↪
      ↪         correlation_threshold=0.50,
      ↪
      ↪         standardization=True,
      ↪
      ↪         model_type='RandomForestRegressor',
      ↪
      ↪         n_estimators=12,
      ↪
      ↪         target_column_name = target,
      ↪
      ↪         random_state=random_state,
      ↪
      ↪         train_test_split=True,
      ↪
      ↪         verbose=True)
```

I am doing standardization...  
 molecular descriptor name

|     |                           |            |                            |
|-----|---------------------------|------------|----------------------------|
| 0   | AATSOZ                    |            |                            |
| 1   | AATSOare                  |            |                            |
| 2   | AATSOd                    |            |                            |
| 3   | AATSOdv                   |            |                            |
| 4   | AATSOi                    |            |                            |
|     | molecular descriptor name | corr_value |                            |
| 0   | AATSOZ                    | -0.020817  |                            |
| 1   | AATSOare                  | -0.148257  |                            |
| 2   | AATSOd                    | 0.022999   |                            |
| 3   | AATSOdv                   | -0.137980  |                            |
| 4   | AATSOi                    | 0.133257   |                            |
|     | molecular descriptor name | corr_value | absolute correlation value |
| 0   | AATSOZ                    | -0.020817  | 0.020817                   |
| 1   | AATSOare                  | -0.148257  | 0.148257                   |
| 2   | AATSOd                    | 0.022999   | 0.022999                   |
| 3   | AATSOdv                   | -0.137980  | 0.137980                   |
| 4   | AATSOi                    | 0.133257   | 0.133257                   |
|     | molecular descriptor name | corr_value | absolute correlation value |
| 226 | AMID_0                    | -0.546843  | 0.546843                   |
| 505 | EState_VSA5               | -0.588780  | 0.588780                   |
| 556 | GATS2c                    | 0.511671   | 0.511671                   |
| 791 | MDEO-12                   | -0.582747  | 0.582747                   |
| 847 | NdO                       | -0.500462  | 0.500462                   |
|     | molecular descriptor name | corr_value | absolute correlation value |
| 226 | AMID_0                    | -0.546843  | 0.546843                   |
| 505 | EState_VSA5               | -0.588780  | 0.588780                   |
| 556 | GATS2c                    | 0.511671   | 0.511671                   |
| 791 | MDEO-12                   | -0.582747  | 0.582747                   |
| 847 | NdO                       | -0.500462  | 0.500462                   |

The model used is: RandomForest...

Return the coefficient of determination of the prediction:  
0.6983472822308948

R<sup>2</sup> score: 0.9235215940349127

Correlation coefficient: 0.9610003090711848

Test data - unseen during training:  
R<sup>2</sup> score: 0.6983472822308948

Correlation coefficient: 0.8356717550754571

[7.69834533 5.99736567 7.15163236 7.95490249 7.95796914 7.32280321  
7.97736763 7.1930782 7.99854953 7.86380064 7.25260105 7.86053838  
7.93833005 7.74918107 7.41523265 7.84509988 6.18122122 5.58676987]

|     |          |
|-----|----------|
| 102 | 7.698970 |
| 38  | 5.986741 |
| 8   | 5.984515 |
| 109 | 7.886057 |
| 11  | 7.962574 |
| 51  | 7.698970 |
| 88  | 8.229148 |
| 21  | 7.298432 |

```

82      8.065502
98      7.376751
58      7.602060
64      8.060481
74      7.853872
103     7.853872
91      8.346787
43      7.619789
25      4.989276
30      6.085657

```

Name: BALB/3T3, dtype: float64

Training Root Mean Square Error: 0.23998234483228884

Testing Root Mean Square Error: 0.5051460408205187

### 3.1 Search inside correlation space

```

[24]: step = 0.01
initial_step = corr_low
last_step = corr_high
first_list = [x / 100.0 for x in range(int(initial_step*100),
    ↪ int(last_step*100), int(step*100))]
n_estimators = [range(2,21,1)]
corr_th = []
second_list = []
third_list = []
fourth_l = []
fifth_l = []
f_list = []
fif_list = []
for i in first_list:

    for estimator in n_estimators[0]:

        without_standardization, train_r2, test_r2, _, h_, target_column_name,
    ↪ training_data_RMSE, test_data_RMSE = pred_model.
    ↪ prepare_data_and_create_model(molecular_descriptors_df=data,

    ↪                                     correlation_threshold=i,
    ↪                                     standardization=False,
    ↪                                     model_type='RandomForestRegressor',
    ↪                                     n_estimators_=estimator,
    ↪                                     target_column_name = target,

```



```

    random_state=random_state,

    train_test_split_=True,

    verbose=False)
    corr_th.append(i)
    second_list.append(train_r2)
    third_list.append(test_r2)
    fourth_l.append(training_data_RMSE)
    fifth_l.append(test_data_RMSE)
    f_list.append(len(h_))
    fif_list.append(estimator)

```

```

[25]: df_without_standardization = pd.DataFrame(data=corr_th, columns=["Correlation_
    ↪threshold"])
df_without_standardization['Training data R^2 score'] = second_list
df_without_standardization['Test data R^2 score'] = third_list
df_without_standardization['Training RMSE'] = fourth_l
df_without_standardization['Test RMSE'] = fifth_l
df_without_standardization['Number of features'] = f_list
df_without_standardization['Number of estimators'] = fif_list

```

```

[26]: df_random_forest = df_without_standardization.copy()
#df_without_standardization.to_excel('../Data/
    ↪A549_Random_forest_rs_'+str(random_state)+'.xlsx')

```

```

[27]: corre_list = [x / 100.0 for x in range(int(initial_step*100),
    ↪int(last_step*100), int(0.01*100))]
for element in corre_list:
    element_ =
    ↪df_without_standardization[df_without_standardization['Correlation_
    ↪threshold'] == float(element)]
    plt.plot(element_['Number of estimators'], element_['Training data R^2_
    ↪score'], label = "Training data R^2 score", marker='v')
    plt.plot(element_['Number of estimators'], element_['Test data R^2 score'],
    ↪label = "Test data R^2 score", marker='D')
    plt.legend()
    plt.xlabel('Number of estimators -> correlation threshold: '+str(element)+'.'
    ↪\n Number of features: '+str(element_['Number of features'].iloc[0]))
    plt.xlim(max(element_['Number of estimators'])+1, min(element_['Number of_
    ↪estimators'])-1)
    plt.ylabel('R^2 score')
    plt.ylim([0, 1])
    plt.rc('grid', linestyle="-. ", color='black')
    plt.grid(True)

```

```
plt.show()
```

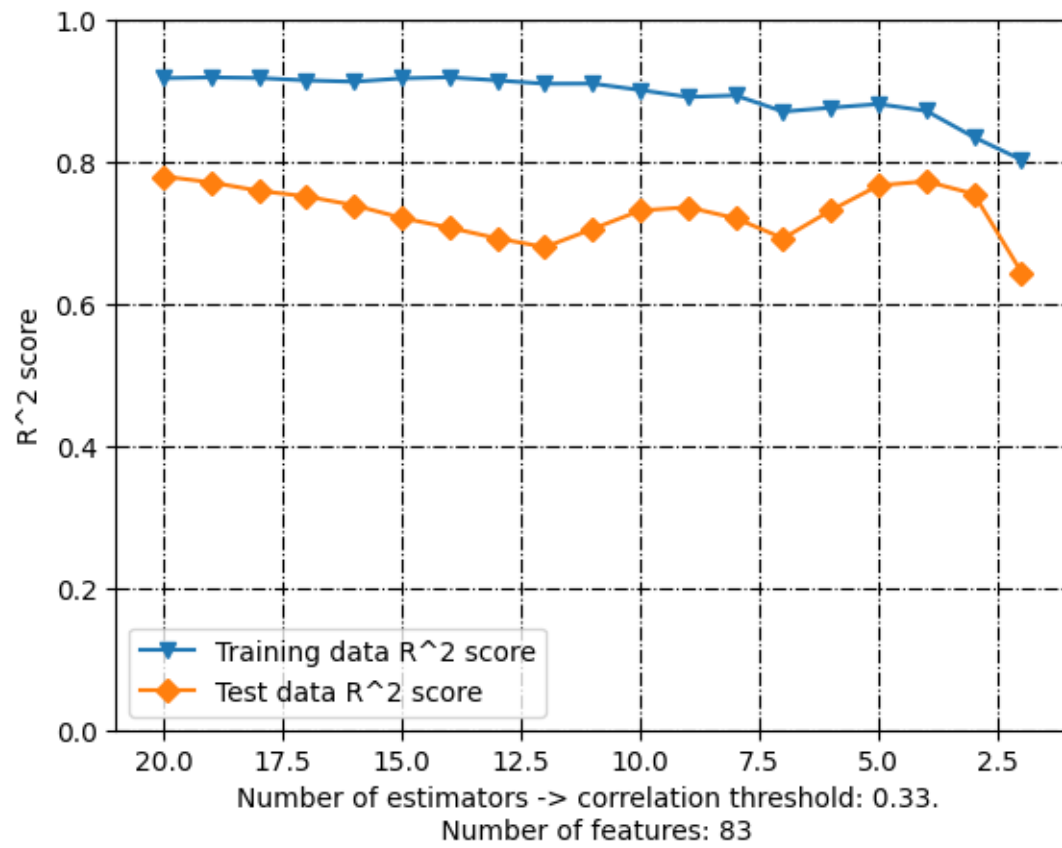

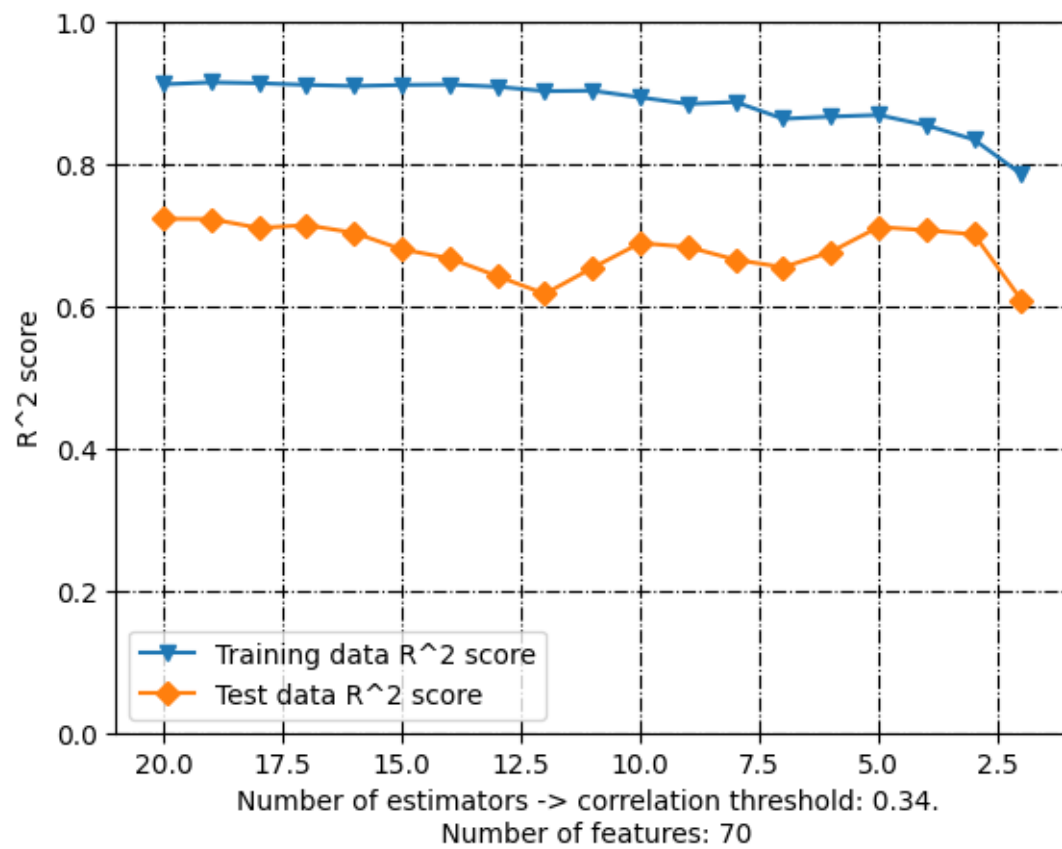

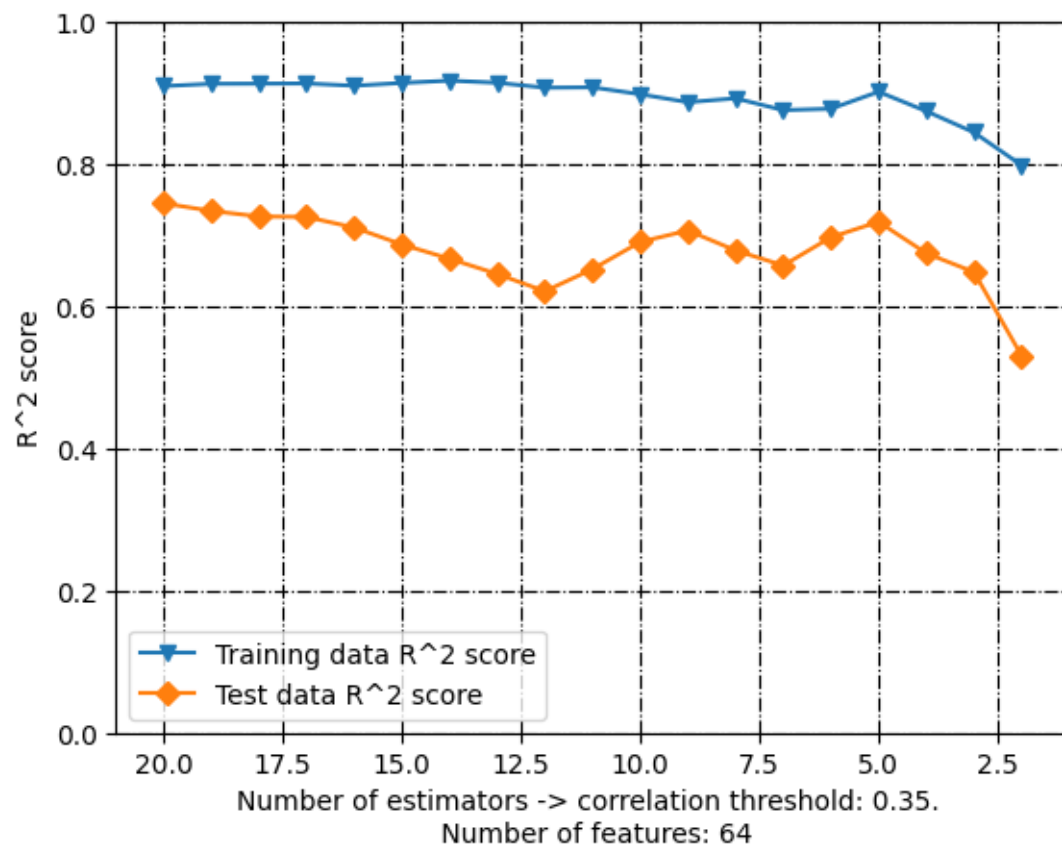

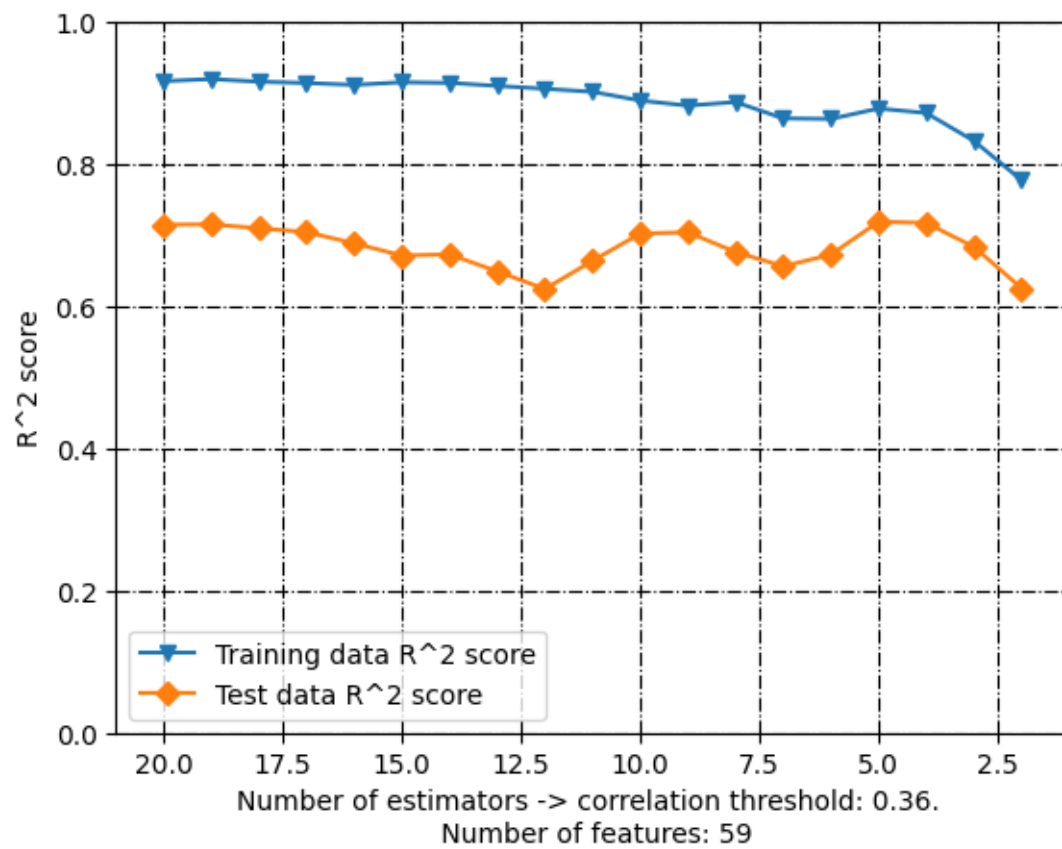

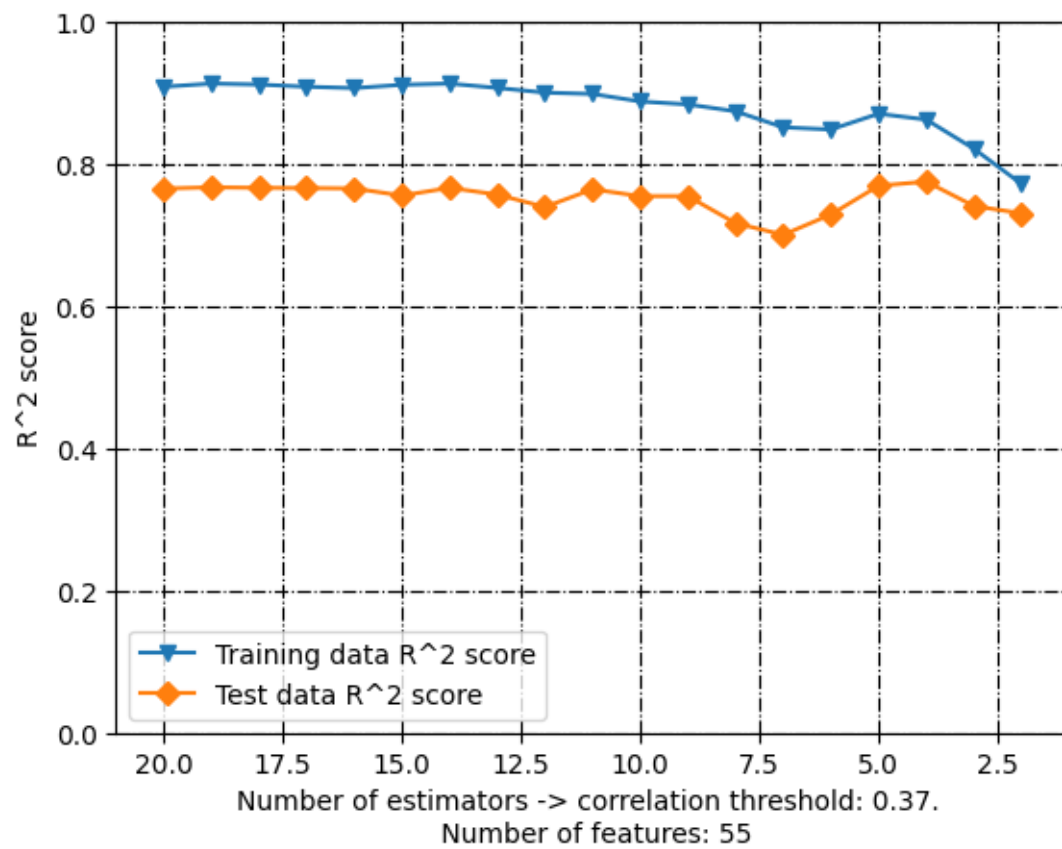

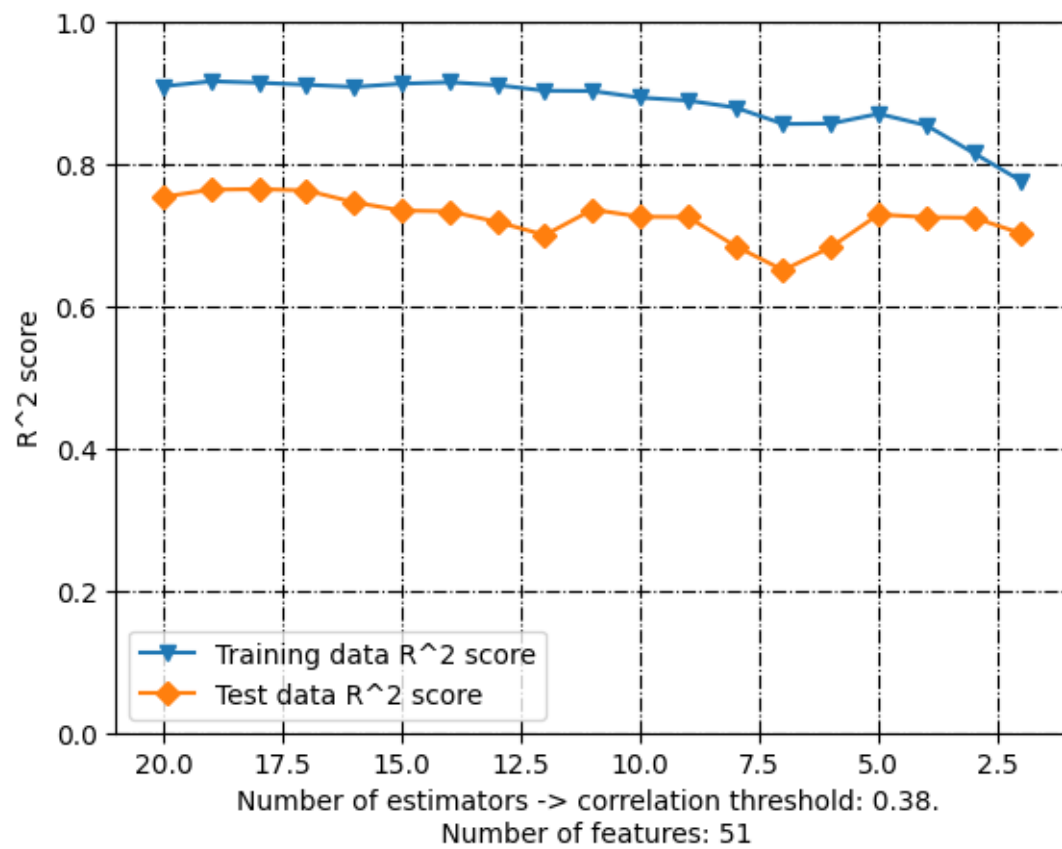

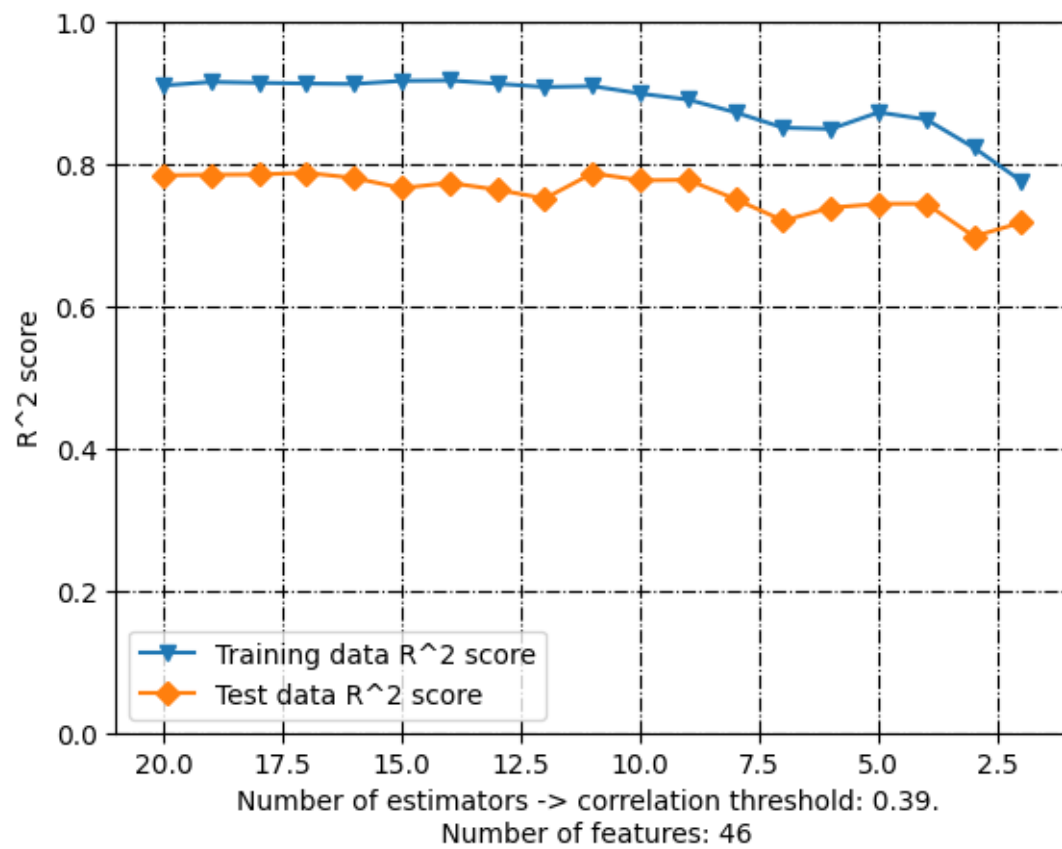



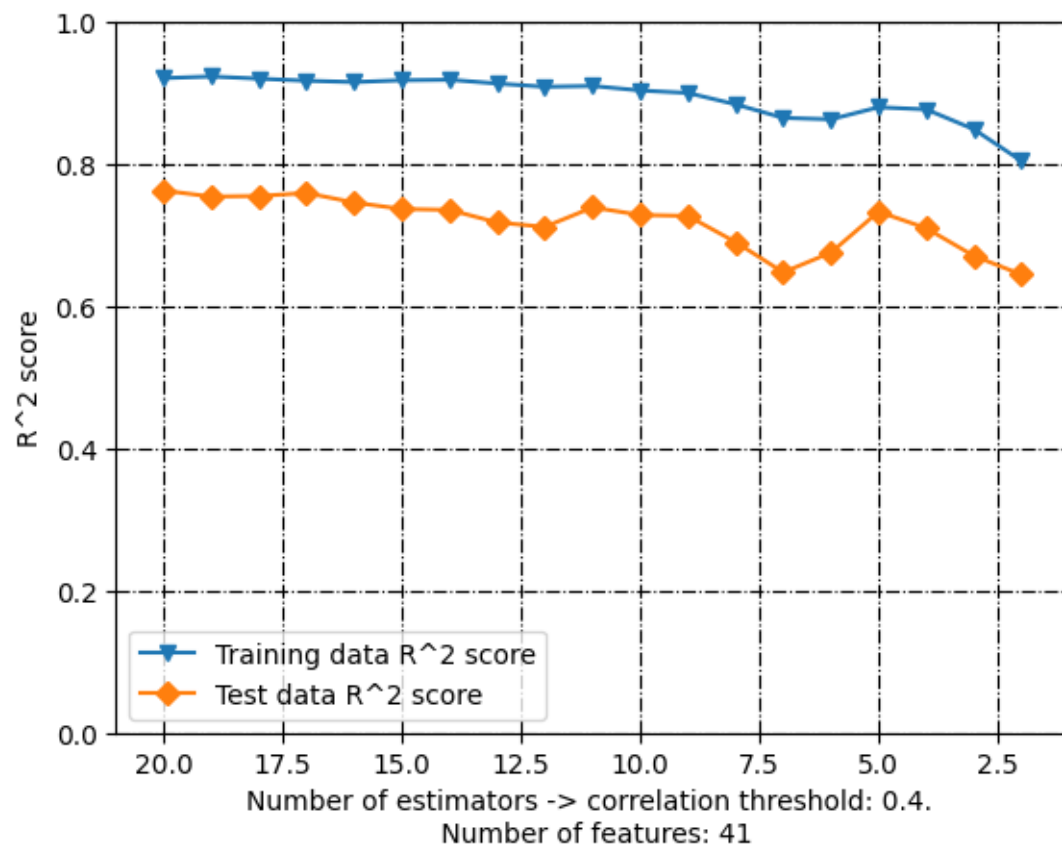

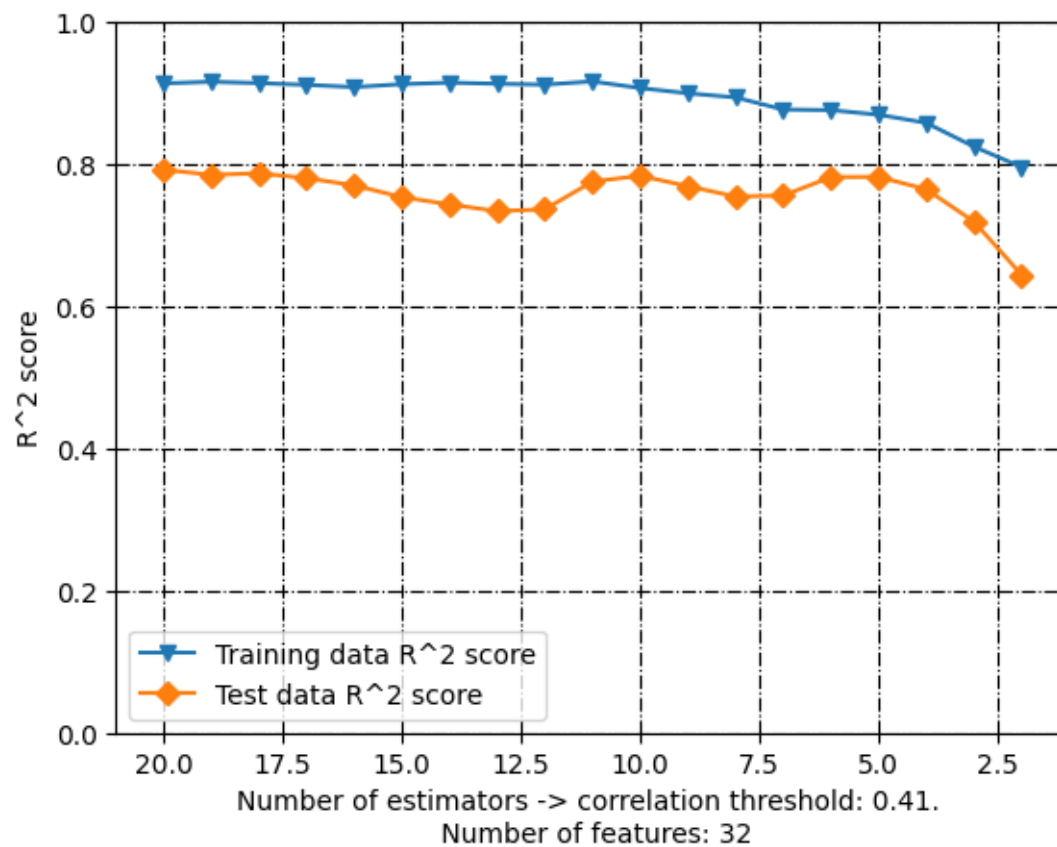

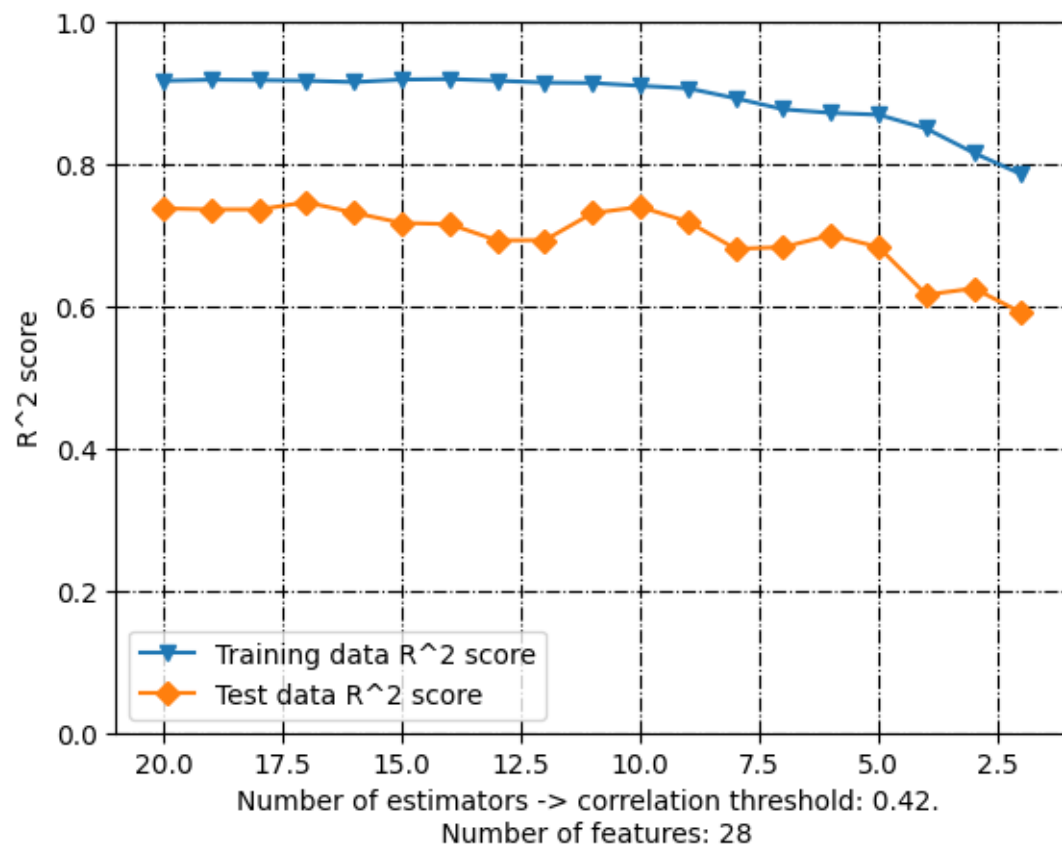

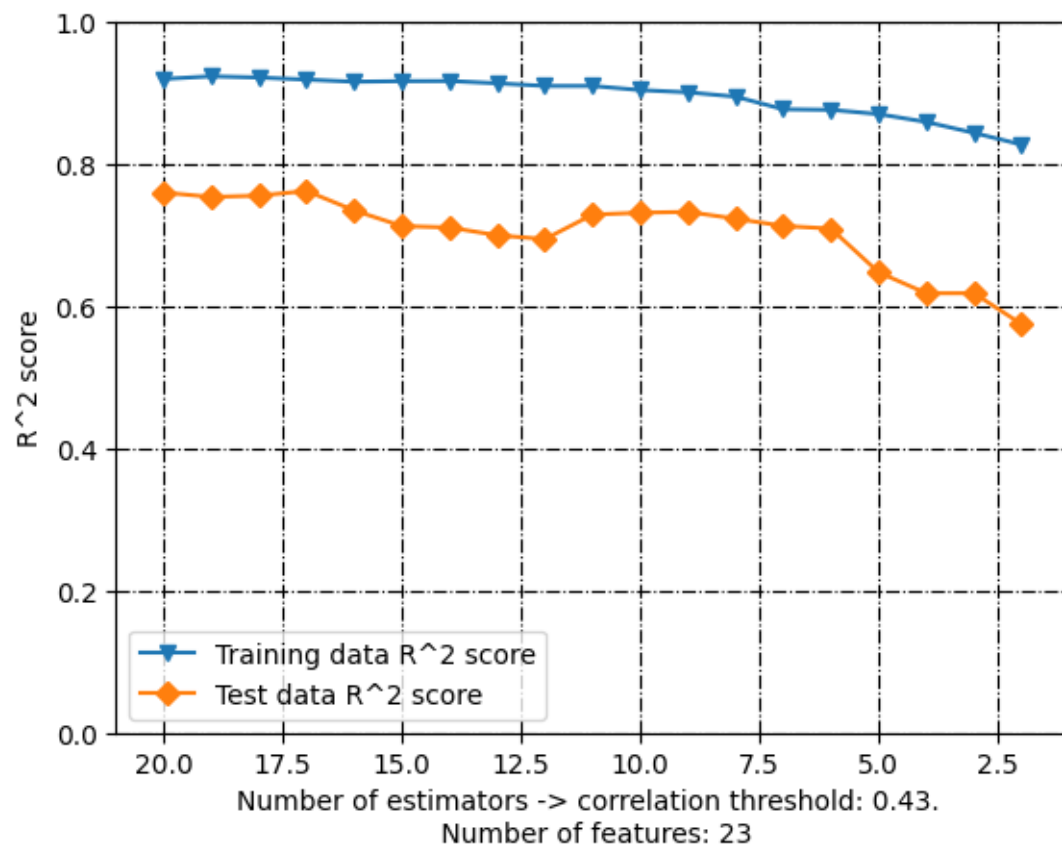

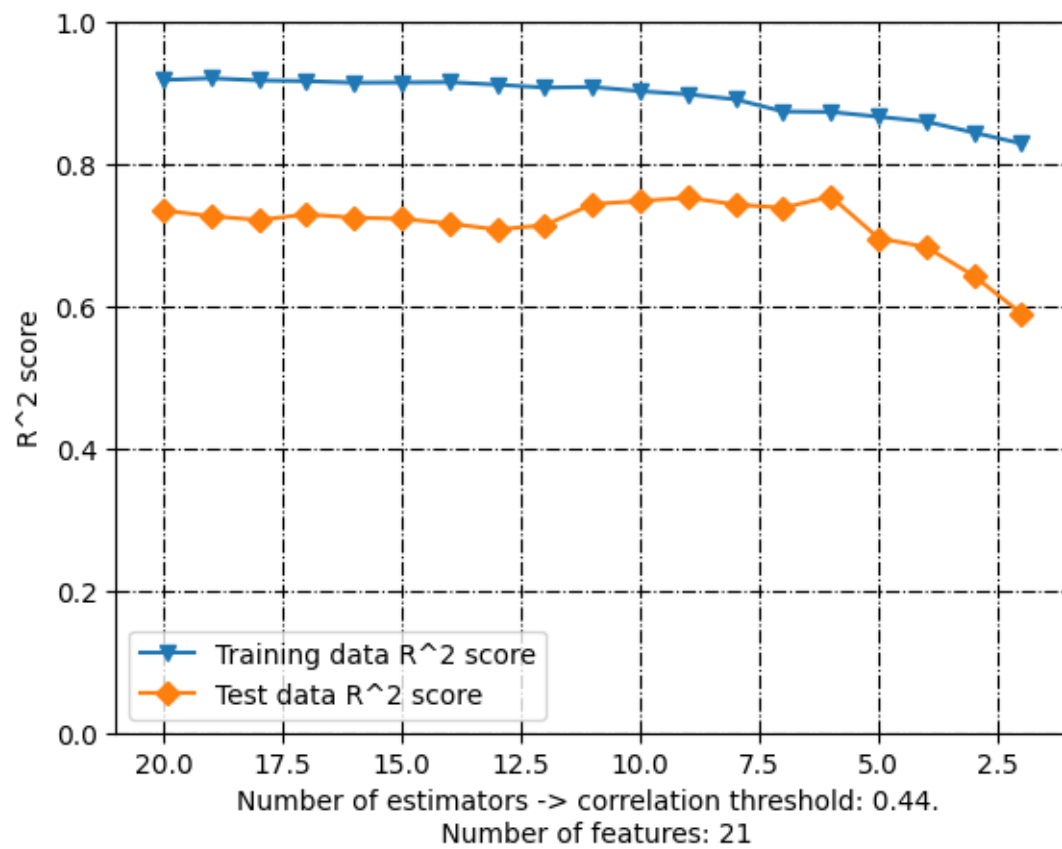

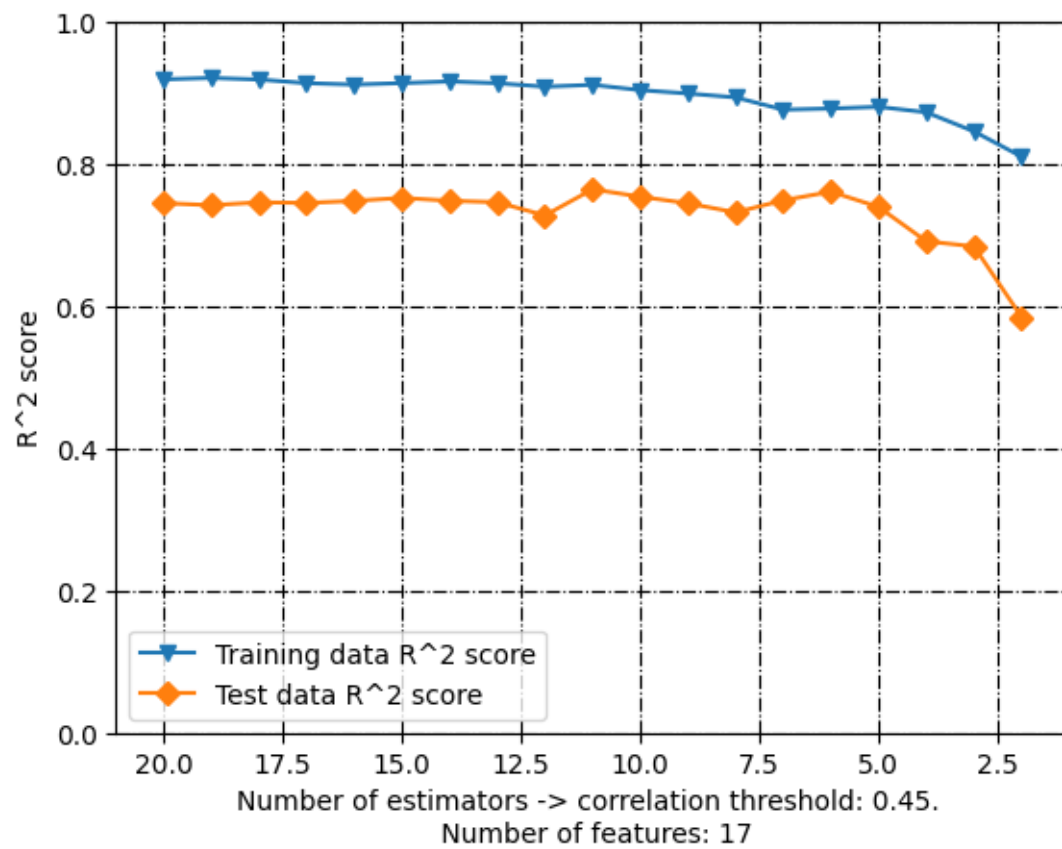

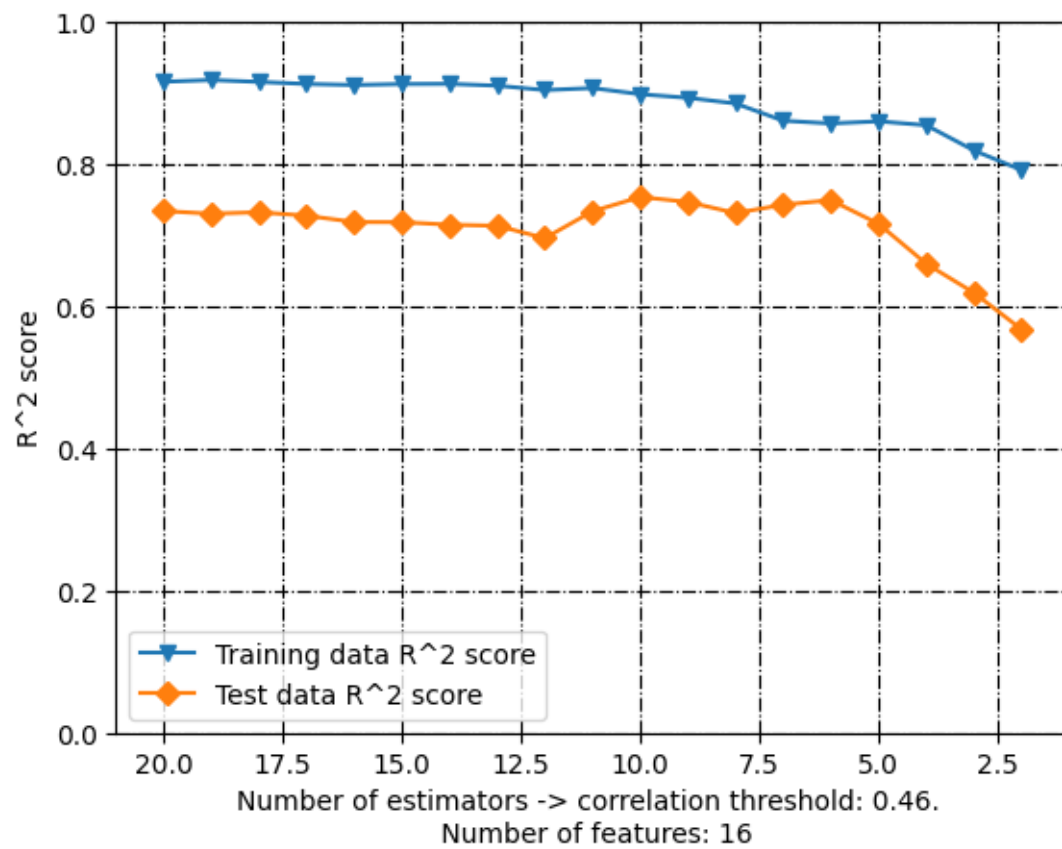

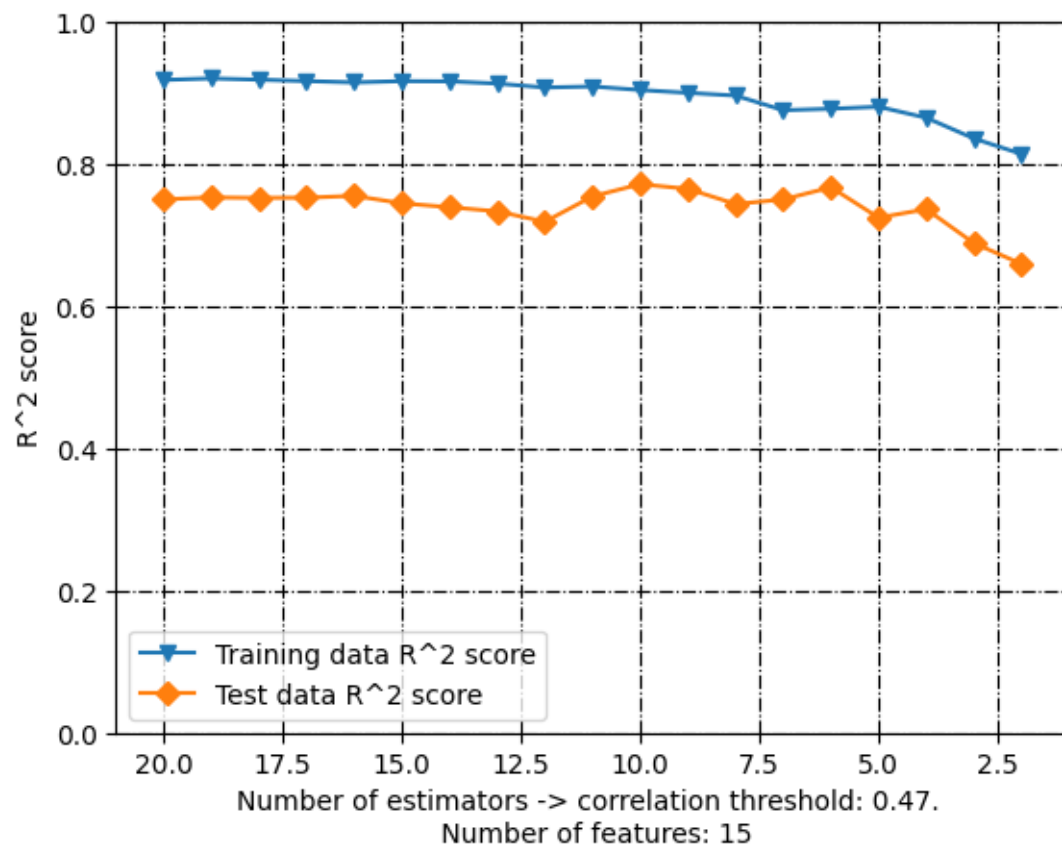



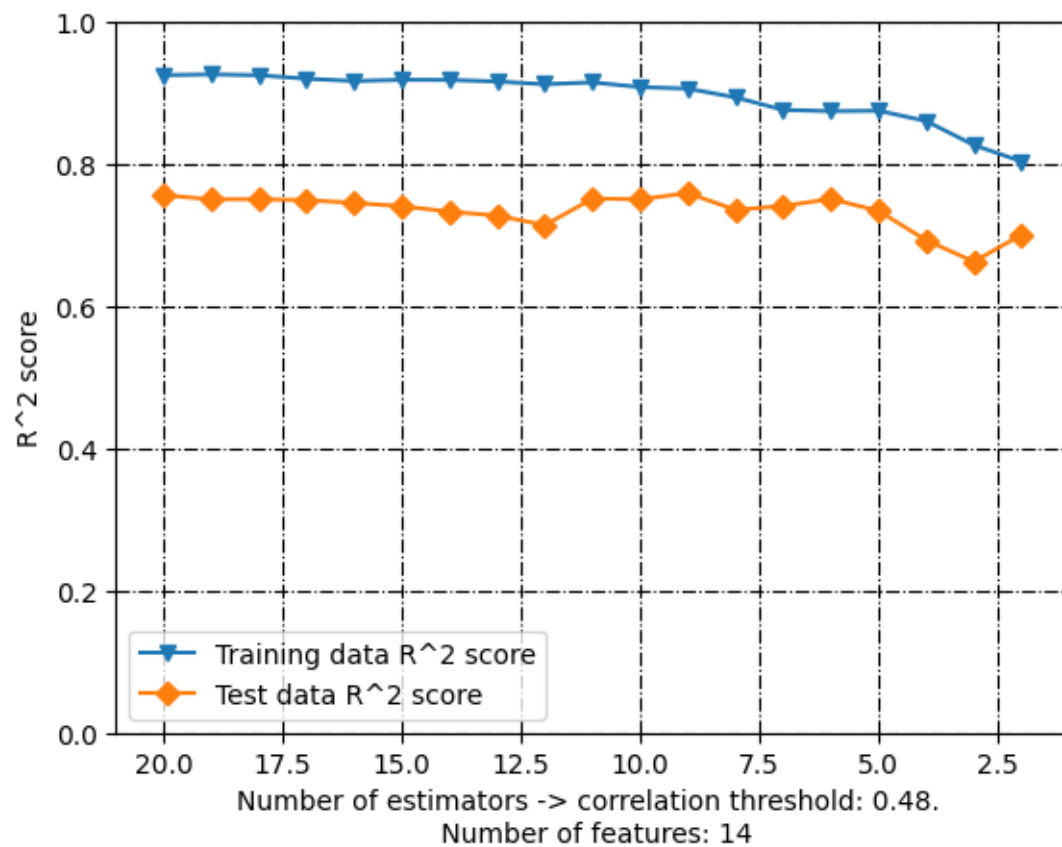

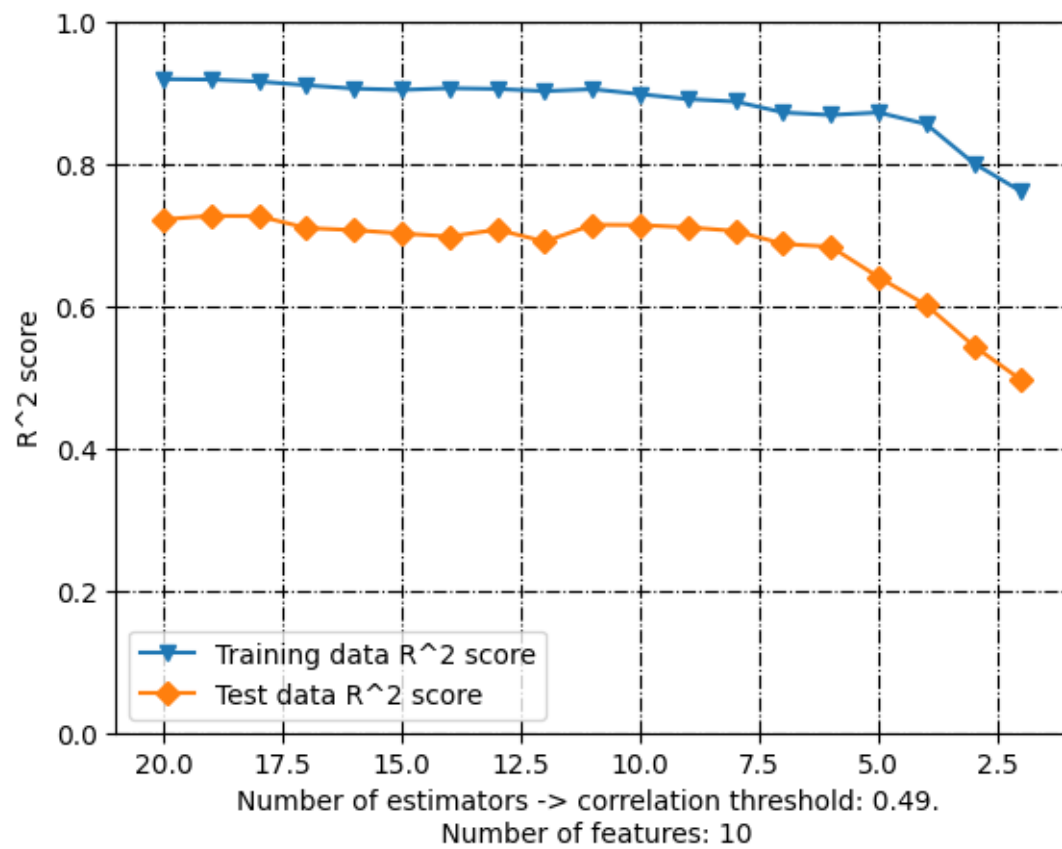

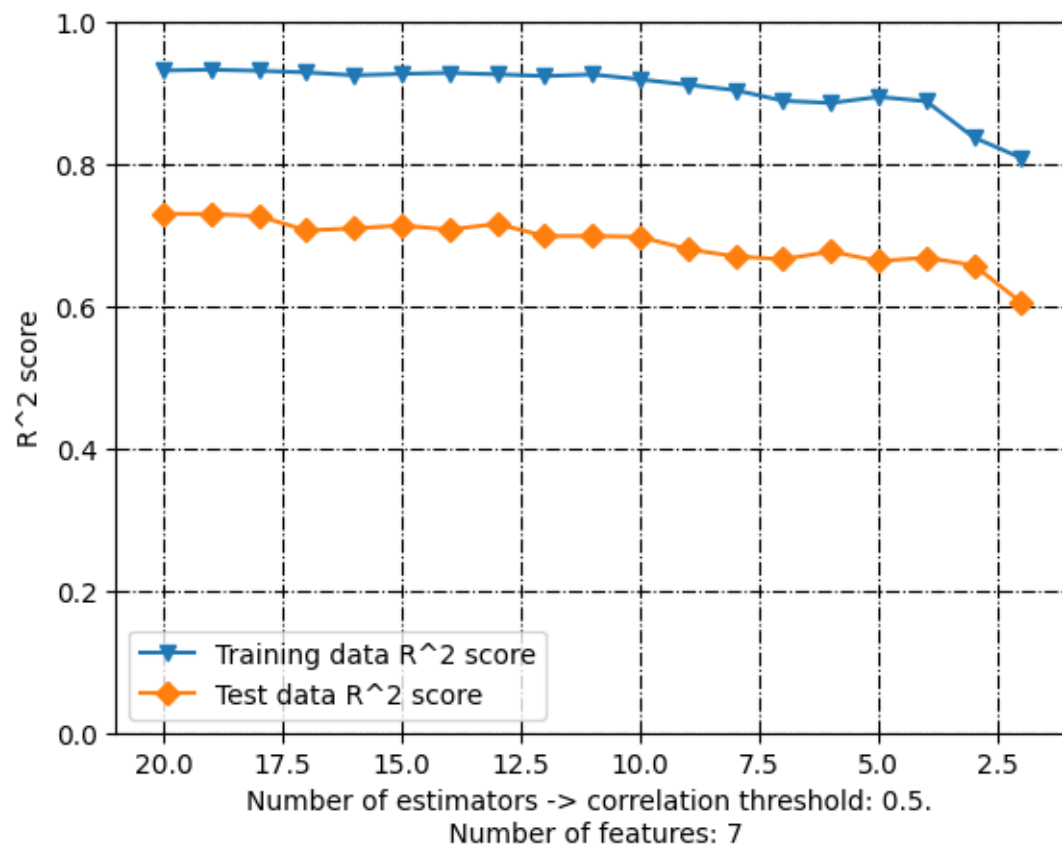

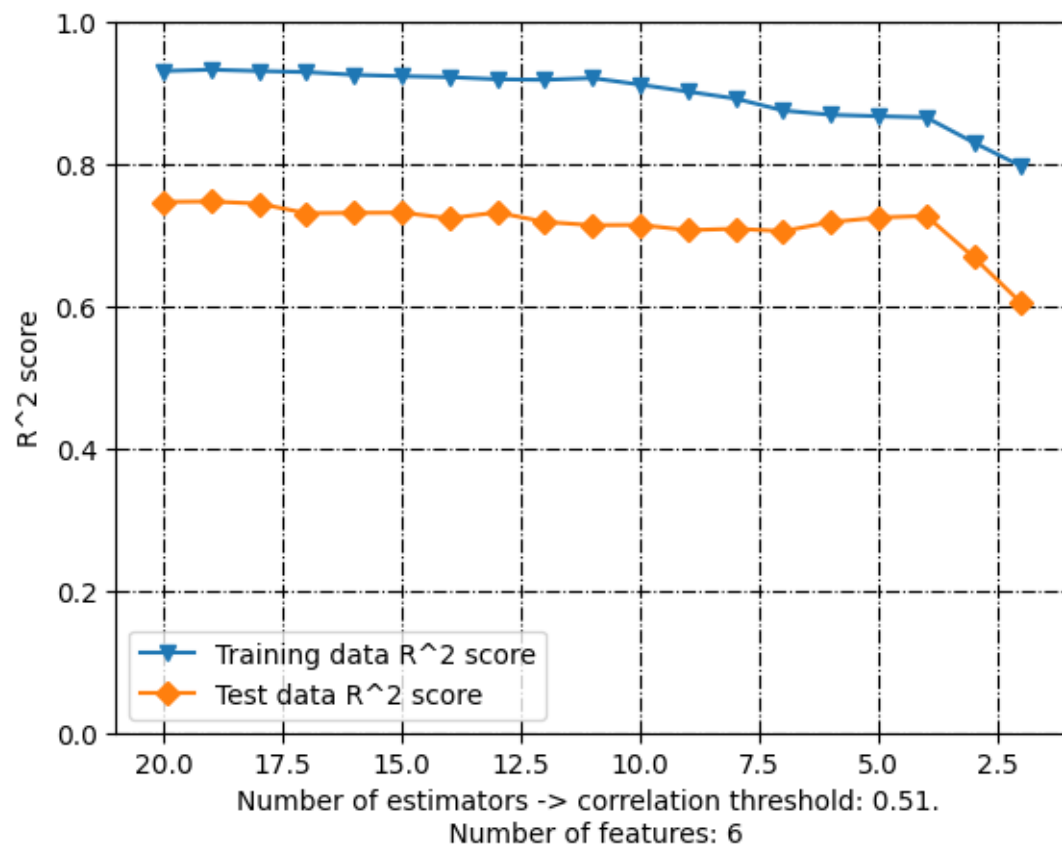

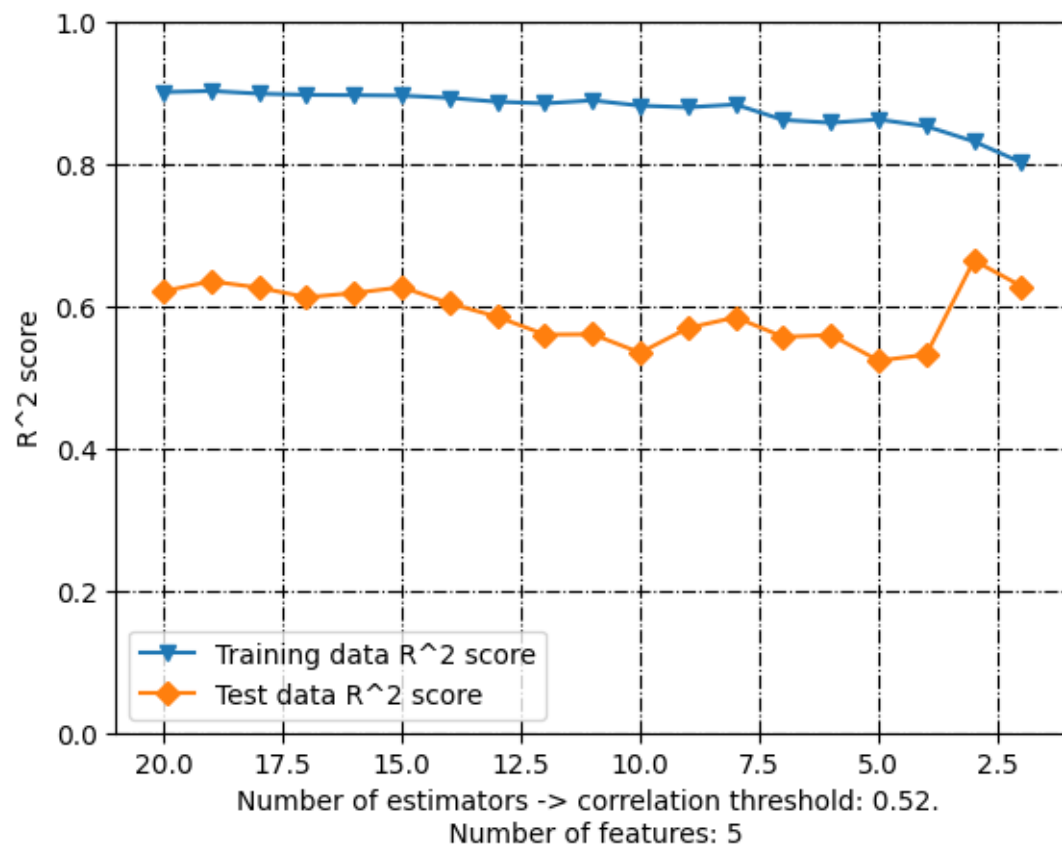

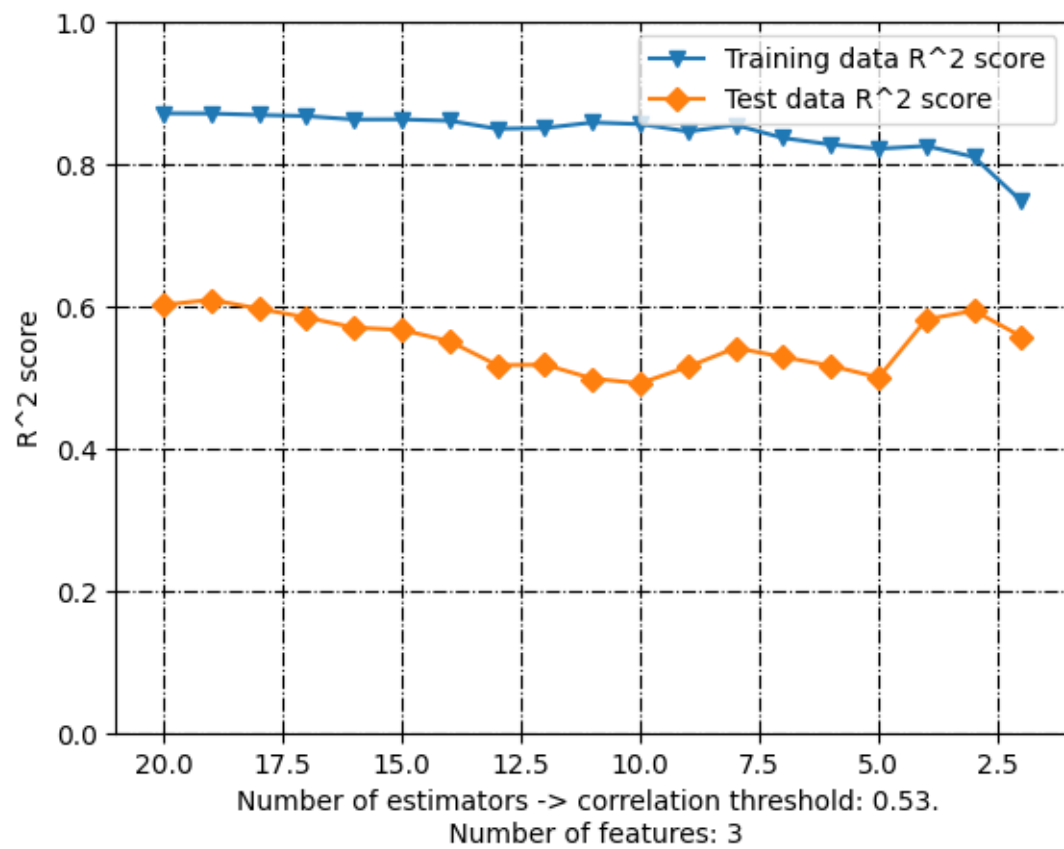

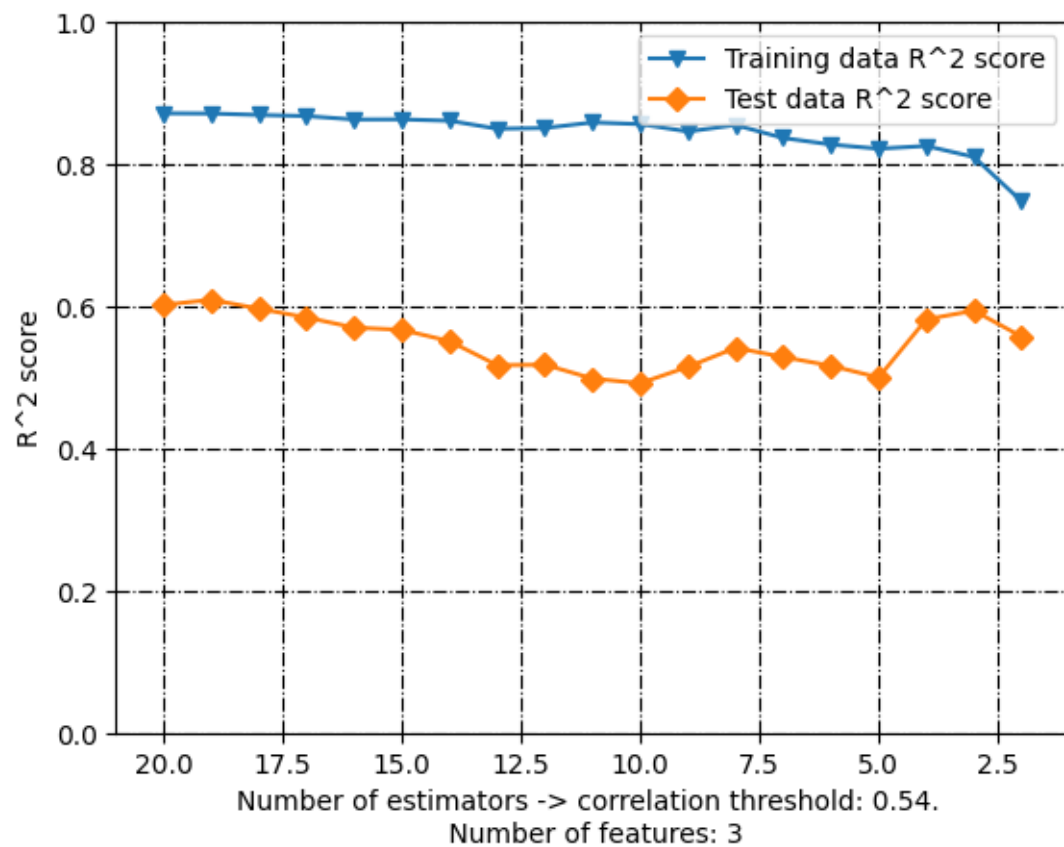

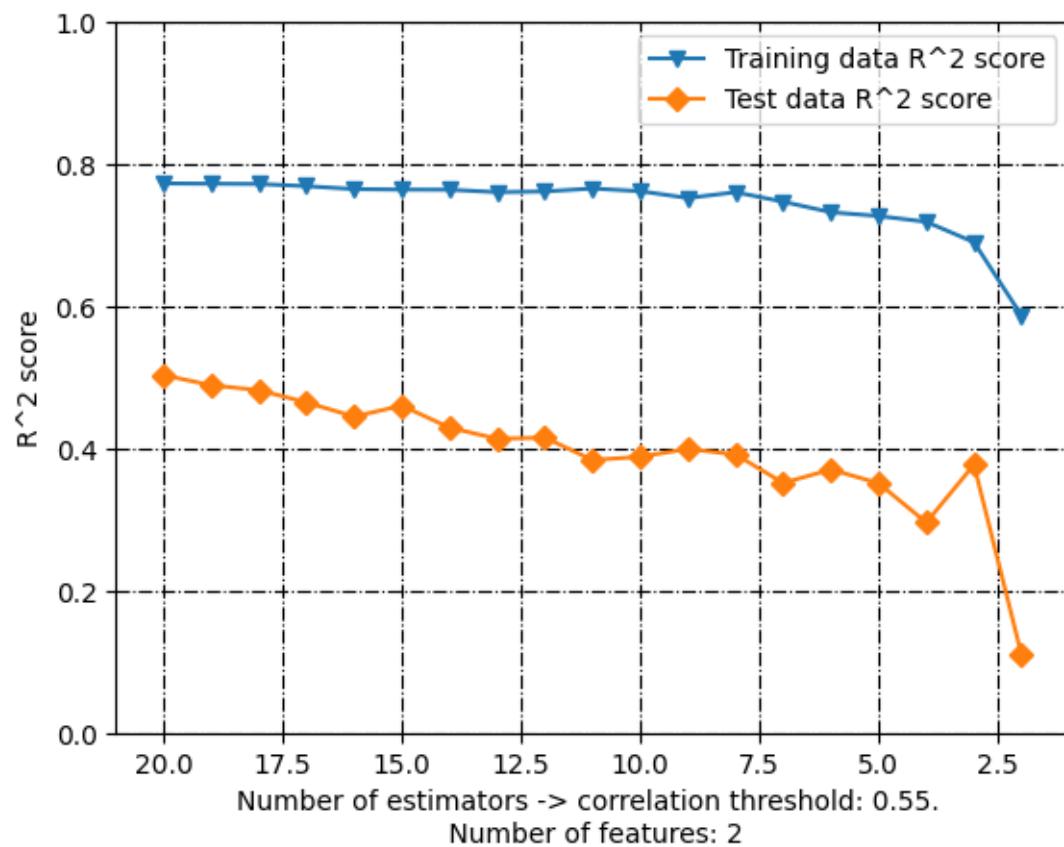



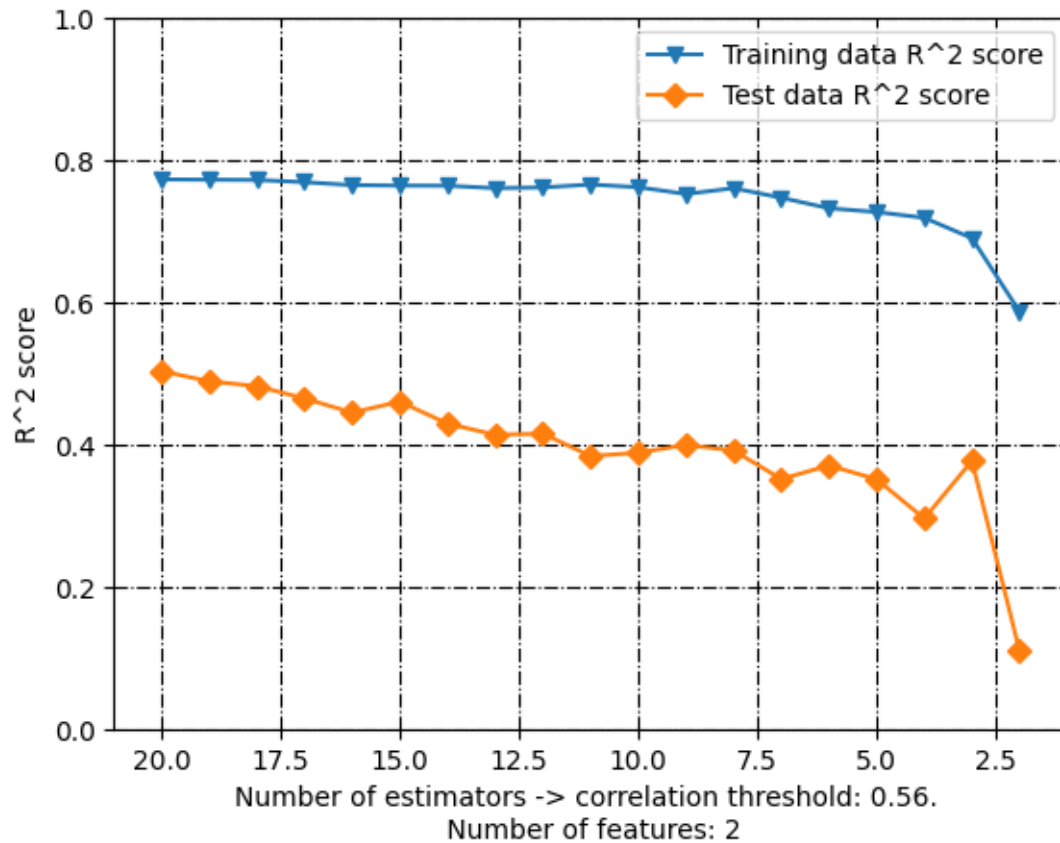

```
[28]: plt.plot(df_without_standardization['Correlation threshold'],  
             df_without_standardization['Number of features'], label = "Number of  
             features", marker='.')  
plt.legend()  
plt.xlabel('Correlation threshold')  
plt.ylabel('Number of features')  
plt.show()
```

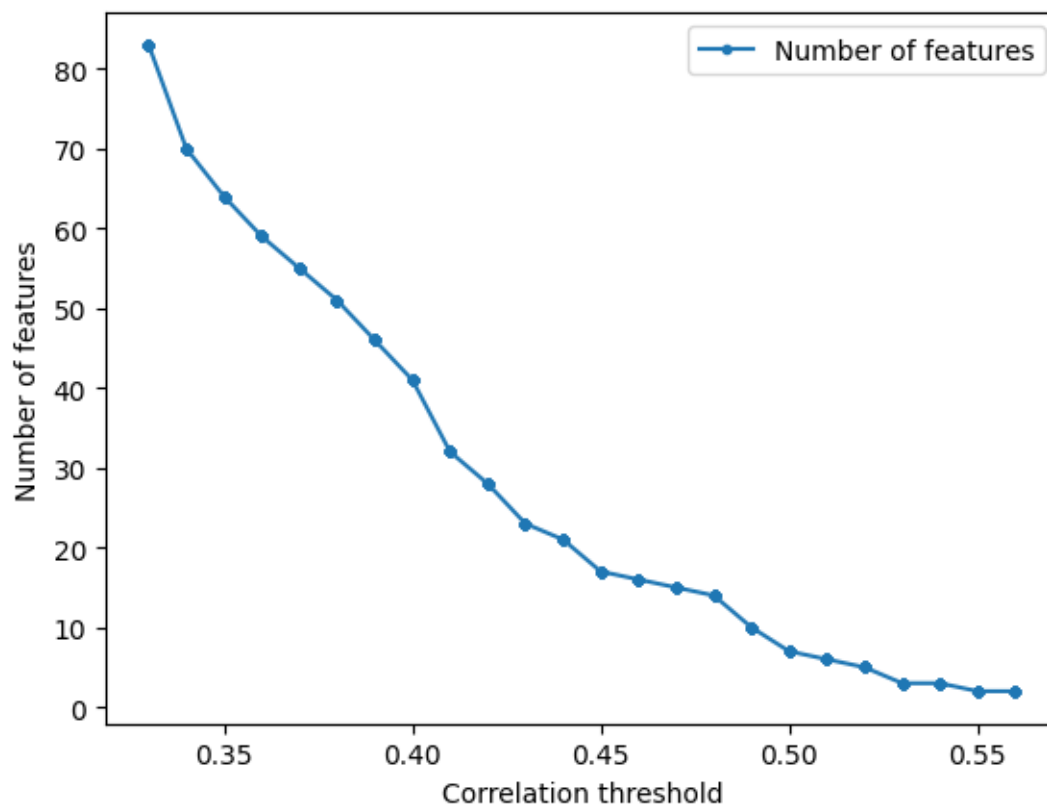

[ ]:

## 4 KNeighborsRegressor

```
[29]: without_standardization, train_r2_, test_r2_, hist1, hist2, target_column_name,
      ↪ training_data_RMSE, test_data_RMSE = pred_model.
      ↪ prepare_data_and_create_model(molecular_descriptors_df=data,
      ↪
      ↪         correlation_threshold=0.50,
      ↪
      ↪         standardization=False,
      ↪
      ↪         model_type='KNeighborsRegressor',
      ↪
      ↪         target_column_name = target,
      ↪
      ↪         random_state=random_state,
      ↪
      ↪         train_test_split_=True,
```



verbose=True)



I am not doing standardization...

```
molecular descriptor name
0          AATSOZ
1          AATSOare
2          AATSOd
3          AATSOdv
4          AATSOi
molecular descriptor name  corr_value
0          AATSOZ          -0.020817
1          AATSOare        -0.148257
2          AATSOd           0.022999
3          AATSOdv         -0.137980
4          AATSOi           0.133257
molecular descriptor name  corr_value  absolute correlation value
0          AATSOZ          -0.020817          0.020817
1          AATSOare        -0.148257          0.148257
2          AATSOd           0.022999          0.022999
3          AATSOdv         -0.137980          0.137980
4          AATSOi           0.133257          0.133257
molecular descriptor name  corr_value  absolute correlation value
226          AMID_O        -0.546843          0.546843
505          EState_VSA5    -0.588780          0.588780
556          GATS2c         0.511671          0.511671
791          MDEO-12        -0.582747          0.582747
847          NdO           -0.500462          0.500462
molecular descriptor name  corr_value  absolute correlation value
226          AMID_O        -0.546843          0.546843
505          EState_VSA5    -0.588780          0.588780
556          GATS2c         0.511671          0.511671
791          MDEO-12        -0.582747          0.582747
847          NdO           -0.500462          0.500462
The model used is: KNeighbors...
Return the coefficient of determination of the prediction:
0.7760027882370206
R^2 score: 0.5372579380668501
Correlation coefficient: 0.7329788114719621
Test data - unseen during training:
R^2 score: 0.7760027882370206
Correlation coefficient: 0.8809102044119029
[7.30313411 5.54474773 6.10879495 7.71347634 7.56570649 7.71206513
 8.07390425 7.56570649 8.07879901 8.01201206 6.52417123 7.84887537
 7.99442102 7.30313411 7.93705287 7.73919765 5.77329499 6.25872803]
102      7.698970
38       5.986741
8        5.984515
```

```

109    7.886057
11     7.962574
51     7.698970
88     8.229148
21     7.298432
82     8.065502
98     7.376751
58     7.602060
64     8.060481
74     7.853872
103    7.853872
91     8.346787
43     7.619789
25     4.989276
30     6.085657
Name: BALB/3T3, dtype: float64
Training Root Mean Square Error: 0.5903089494742803
Testing Root Mean Square Error: 0.43529596197447046

```

```

[30]: print(target_column_name+str('_transformed'))
      print(hist1[target_column_name].hist())

```

```

BALB/3T3_transformed
AxesSubplot(0.125,0.11;0.775x0.77)

```

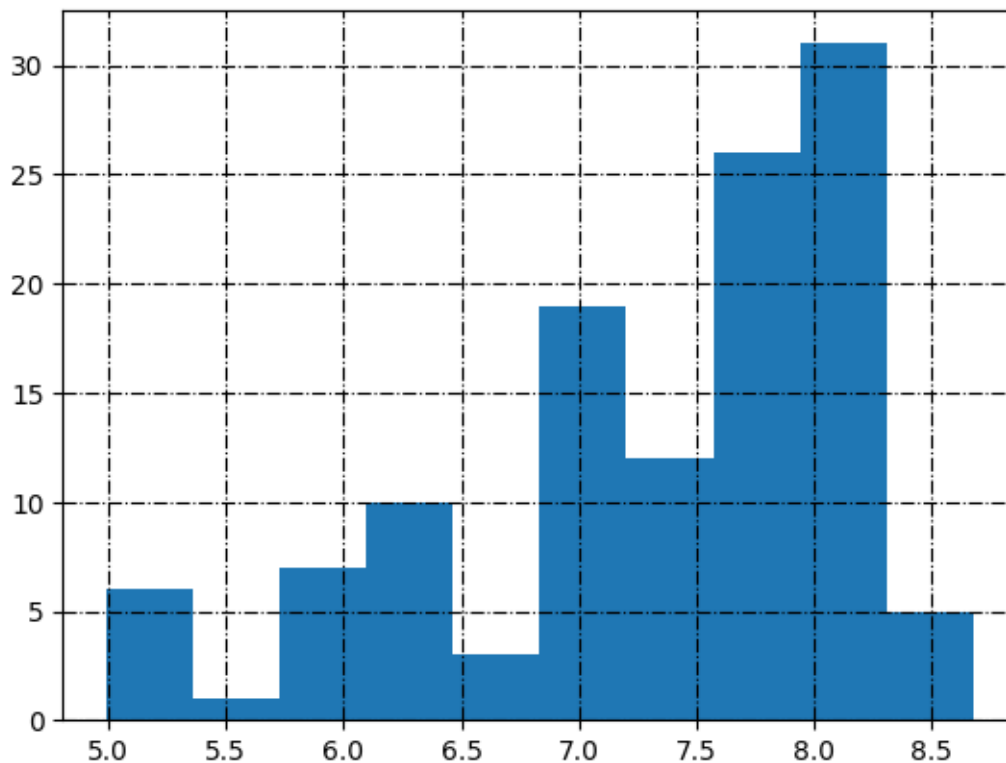

```
[31]: with_standardization, train_r2_, test_r2_, hist1, hist2, target_column_name,
      ↪ training_data_RMSE, test_data_RMSE = pred_model.
      ↪ prepare_data_and_create_model(molecular_descriptors_df=data,
      ↪
      ↪         correlation_threshold=0.50,
      ↪
      ↪         standardization=True,
      ↪
      ↪         model_type='KNeighborsRegressor',
      ↪
      ↪         target_column_name = target,
      ↪
      ↪         random_state=random_state,
      ↪
      ↪         train_test_split_=True,
      ↪
      ↪         verbose=True)
```

I am doing standardization...

|   | molecular descriptor name |  |
|---|---------------------------|--|
| 0 | AATS0Z                    |  |
| 1 | AATS0are                  |  |
| 2 | AATS0d                    |  |
| 3 | AATS0dv                   |  |
| 4 | AATS0i                    |  |

  

|   | molecular descriptor name | corr_value |
|---|---------------------------|------------|
| 0 | AATS0Z                    | -0.020817  |
| 1 | AATS0are                  | -0.148257  |
| 2 | AATS0d                    | 0.022999   |
| 3 | AATS0dv                   | -0.137980  |
| 4 | AATS0i                    | 0.133257   |

  

|   | molecular descriptor name | corr_value | absolute correlation value |
|---|---------------------------|------------|----------------------------|
| 0 | AATS0Z                    | -0.020817  | 0.020817                   |
| 1 | AATS0are                  | -0.148257  | 0.148257                   |
| 2 | AATS0d                    | 0.022999   | 0.022999                   |
| 3 | AATS0dv                   | -0.137980  | 0.137980                   |
| 4 | AATS0i                    | 0.133257   | 0.133257                   |

  

|     | molecular descriptor name | corr_value | absolute correlation value |
|-----|---------------------------|------------|----------------------------|
| 226 | AMID_0                    | -0.546843  | 0.546843                   |
| 505 | EState_VSA5               | -0.588780  | 0.588780                   |
| 556 | GATS2c                    | 0.511671   | 0.511671                   |
| 791 | MDE0-12                   | -0.582747  | 0.582747                   |
| 847 | Nd0                       | -0.500462  | 0.500462                   |

  

|     | molecular descriptor name | corr_value | absolute correlation value |
|-----|---------------------------|------------|----------------------------|
| 226 | AMID_0                    | -0.546843  | 0.546843                   |
| 505 | EState_VSA5               | -0.588780  | 0.588780                   |

|     |         |           |          |
|-----|---------|-----------|----------|
| 556 | GATS2c  | 0.511671  | 0.511671 |
| 791 | MDE0-12 | -0.582747 | 0.582747 |
| 847 | NdO     | -0.500462 | 0.500462 |

The model used is: KNeighbors...

Return the coefficient of determination of the prediction:

0.7760027882370206

R<sup>2</sup> score: 0.5372579380668501

Correlation coefficient: 0.7329788114719621

Test data - unseen during training:

R<sup>2</sup> score: 0.7760027882370206

Correlation coefficient: 0.8809102044119029

[7.30313411 5.54474773 6.10879495 7.71347634 7.56570649 7.71206513  
8.07390425 7.56570649 8.07879901 8.01201206 6.52417123 7.84887537  
7.99442102 7.30313411 7.93705287 7.73919765 5.77329499 6.25872803]

102 7.698970

38 5.986741

8 5.984515

109 7.886057

11 7.962574

51 7.698970

88 8.229148

21 7.298432

82 8.065502

98 7.376751

58 7.602060

64 8.060481

74 7.853872

103 7.853872

91 8.346787

43 7.619789

25 4.989276

30 6.085657

Name: BALB/3T3, dtype: float64

Training Root Mean Square Error: 0.5903089494742803

Testing Root Mean Square Error: 0.43529596197447046

#### 4.1 Search inside correlation space

```
[32]: step = 0.01
initial_step = corr_low
last_step = corr_high
first_list = [x / 100.0 for x in range(int(initial_step*100),
    ↪int(last_step*100), int(step*100))]
second_list = []
third_list = []
fourth_l = []
fifth_l = []
```

```

f_list = []
for i in first_list:
    without_standardization, train_r2, test_r2, _, h_, target_column_name, \
    ↪ training_data_RMSE, test_data_RMSE = pred_model.
    ↪ prepare_data_and_create_model(molecular_descriptors_df = data,

    ↪ correlation_threshold = i,

    ↪ standardization = False,

    ↪ model_type = 'KNeighborsRegressor',

    ↪ target_column_name = target,

    ↪ random_state=random_state,

    ↪ train_test_split_ = True,

    ↪ verbose = False)
    second_list.append(train_r2)
    third_list.append(test_r2)
    fourth_l.append(training_data_RMSE)
    fifth_l.append(test_data_RMSE)
    f_list.append(len(h_))

```

File "C:\Users\aleks\anaconda3\envs\cheminf\_gpu\lib\site-packages\joblib\externals\loky\backend\context.py", line 217, in \_count\_physical\_cores  
raise ValueError(

```

[33]: df_without_standardization = pd.DataFrame(data=first_list, \
    ↪ columns=["Correlation threshold"])
df_without_standardization['Training data R^2 score'] = second_list
df_without_standardization['Test data R^2 score'] = third_list
df_without_standardization['Training RMSE'] = fourth_l
df_without_standardization['Test RMSE'] = fifth_l
df_without_standardization['Number of features'] = f_list

```

```

[34]: df_k_nearest = df_without_standardization.copy()
df_without_standardization

```

```

[34]: Correlation threshold  Training data R^2 score  Test data R^2 score  \
0                0.33          0.551371          0.488642
1                0.34          0.510303          0.579362
2                0.35          0.510303          0.579362
3                0.36          0.510303          0.579362
4                0.37          0.510303          0.579362

```

|    |      |          |          |
|----|------|----------|----------|
| 5  | 0.38 | 0.510303 | 0.579362 |
| 6  | 0.39 | 0.638422 | 0.692804 |
| 7  | 0.40 | 0.638422 | 0.692804 |
| 8  | 0.41 | 0.591252 | 0.523025 |
| 9  | 0.42 | 0.594542 | 0.409736 |
| 10 | 0.43 | 0.590606 | 0.470853 |
| 11 | 0.44 | 0.595417 | 0.384114 |
| 12 | 0.45 | 0.595085 | 0.395033 |
| 13 | 0.46 | 0.597077 | 0.395033 |
| 14 | 0.47 | 0.596785 | 0.401560 |
| 15 | 0.48 | 0.602007 | 0.373963 |
| 16 | 0.49 | 0.600338 | 0.366093 |
| 17 | 0.50 | 0.537258 | 0.776003 |
| 18 | 0.51 | 0.542450 | 0.780535 |
| 19 | 0.52 | 0.537291 | 0.774699 |
| 20 | 0.53 | 0.534515 | 0.730942 |
| 21 | 0.54 | 0.534515 | 0.730942 |
| 22 | 0.55 | 0.478665 | 0.752177 |
| 23 | 0.56 | 0.478665 | 0.752177 |

|    | Training RMSE | Test RMSE | Number of features |
|----|---------------|-----------|--------------------|
| 0  | 0.581237      | 0.657697  | 83                 |
| 1  | 0.607259      | 0.596510  | 70                 |
| 2  | 0.607259      | 0.596510  | 64                 |
| 3  | 0.607259      | 0.596510  | 59                 |
| 4  | 0.607259      | 0.596510  | 55                 |
| 5  | 0.607259      | 0.596510  | 51                 |
| 6  | 0.521808      | 0.509766  | 46                 |
| 7  | 0.521808      | 0.509766  | 41                 |
| 8  | 0.554801      | 0.635201  | 32                 |
| 9  | 0.552565      | 0.706621  | 28                 |
| 10 | 0.555240      | 0.669039  | 23                 |
| 11 | 0.551968      | 0.721794  | 21                 |
| 12 | 0.552194      | 0.715367  | 17                 |
| 13 | 0.550834      | 0.715367  | 16                 |
| 14 | 0.551034      | 0.711498  | 15                 |
| 15 | 0.547454      | 0.727718  | 14                 |
| 16 | 0.548601      | 0.732278  | 10                 |
| 17 | 0.590309      | 0.435296  | 7                  |
| 18 | 0.586988      | 0.430870  | 6                  |
| 19 | 0.590288      | 0.436561  | 5                  |
| 20 | 0.592056      | 0.477075  | 3                  |
| 21 | 0.592056      | 0.477075  | 3                  |
| 22 | 0.626568      | 0.457861  | 2                  |
| 23 | 0.626568      | 0.457861  | 2                  |



## 4.2 Plots

```
[35]: plt.plot(df_without_standardization['Correlation threshold'],  
             df_without_standardization['Training data R^2 score'], label = "Training_  
             data R^2 score", marker='v')  
plt.plot(df_without_standardization['Correlation threshold'],  
         df_without_standardization['Test data R^2 score'], label = "Test data R^2_  
         score", marker='D')  
plt.legend()  
plt.xlabel('Correlation threshold')  
plt.ylabel('R^2 score')  
plt.ylim([0, 1])  
plt.show()
```

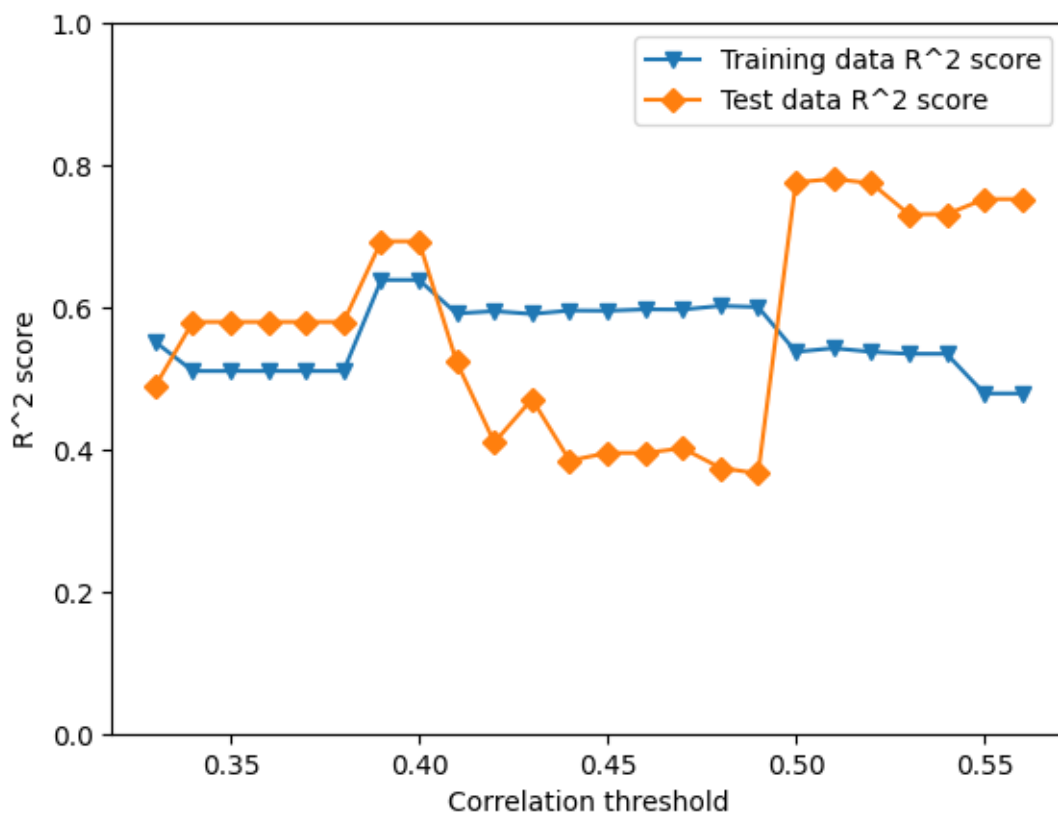

```
[36]: plt.plot(df_without_standardization['Correlation threshold'],  
             df_without_standardization['Number of features'], label = "Number of_  
             features", marker='.')  
plt.legend()  
plt.xlabel('Correlation threshold')  
plt.ylabel('Number of features')  
plt.show()
```

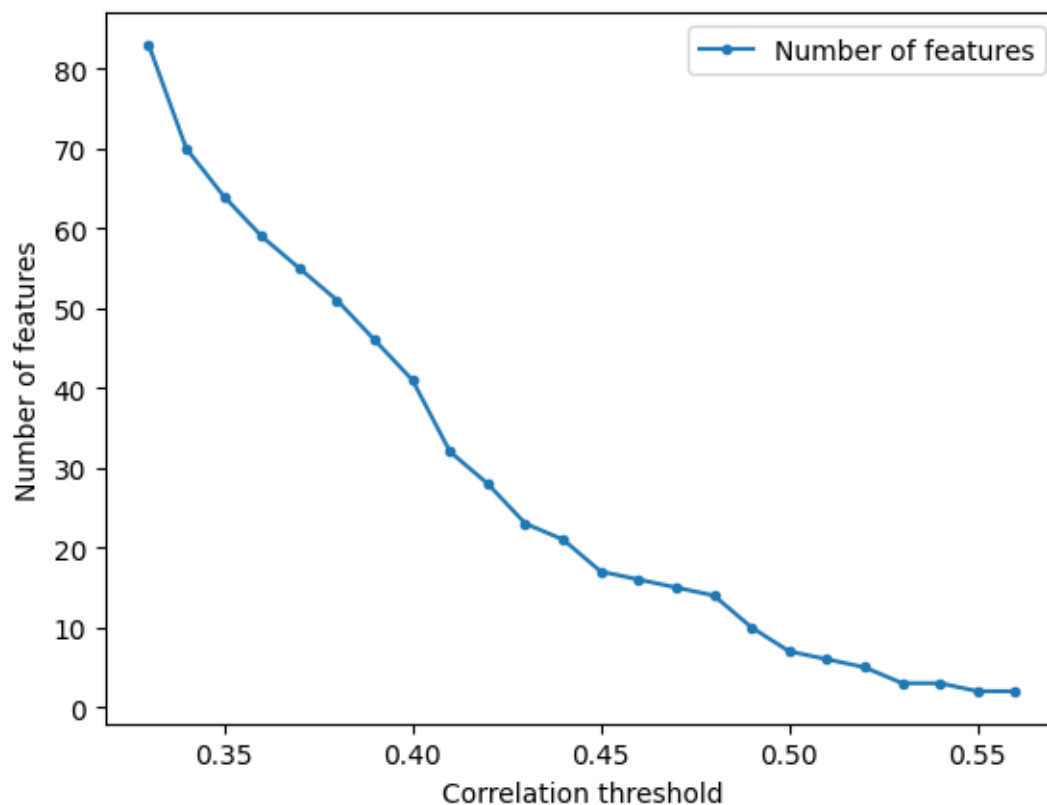

[ ]:

## 5 Support Vector Machines (SVM)

```
[37]: without_standardization, train_r2_, test_r2_, hist1, hist2, target_column_name,
      ↪ training_data_RMSE, test_data_RMSE = pred_model.
      ↪ prepare_data_and_create_model(molecular_descriptors_df=data,
      ↪
      ↪         correlation_threshold=0.50,
      ↪
      ↪         standardization=False,
      ↪
      ↪         model_type='SVR',
      ↪
      ↪         kernel_ = 'linear',
      ↪
      ↪         gamma_ = 'auto',
      ↪
      ↪         target_column_name = target,
```

```

    random_state=random_state,

    train_test_split_=True,

    verbose=True)

```

I am not doing standardization...

|   | molecular descriptor name |  |
|---|---------------------------|--|
| 0 | AATSOZ                    |  |
| 1 | AATSOare                  |  |
| 2 | AATSOd                    |  |
| 3 | AATSOdv                   |  |
| 4 | AATSOi                    |  |

  

|   | molecular descriptor name | corr_value |
|---|---------------------------|------------|
| 0 | AATSOZ                    | -0.020817  |
| 1 | AATSOare                  | -0.148257  |
| 2 | AATSOd                    | 0.022999   |
| 3 | AATSOdv                   | -0.137980  |
| 4 | AATSOi                    | 0.133257   |

  

|   | molecular descriptor name | corr_value | absolute correlation value |
|---|---------------------------|------------|----------------------------|
| 0 | AATSOZ                    | -0.020817  | 0.020817                   |
| 1 | AATSOare                  | -0.148257  | 0.148257                   |
| 2 | AATSOd                    | 0.022999   | 0.022999                   |
| 3 | AATSOdv                   | -0.137980  | 0.137980                   |
| 4 | AATSOi                    | 0.133257   | 0.133257                   |

  

|     | molecular descriptor name | corr_value | absolute correlation value |
|-----|---------------------------|------------|----------------------------|
| 226 | AMID_0                    | -0.546843  | 0.546843                   |
| 505 | EState_VSA5               | -0.588780  | 0.588780                   |
| 556 | GATS2c                    | 0.511671   | 0.511671                   |
| 791 | MDEO-12                   | -0.582747  | 0.582747                   |
| 847 | NdO                       | -0.500462  | 0.500462                   |

  

|     | molecular descriptor name | corr_value | absolute correlation value |
|-----|---------------------------|------------|----------------------------|
| 226 | AMID_0                    | -0.546843  | 0.546843                   |
| 505 | EState_VSA5               | -0.588780  | 0.588780                   |
| 556 | GATS2c                    | 0.511671   | 0.511671                   |
| 791 | MDEO-12                   | -0.582747  | 0.582747                   |
| 847 | NdO                       | -0.500462  | 0.500462                   |

The model used is: SVR...

Return the coefficient of determination of the prediction:

0.5844087903682672

R<sup>2</sup> score: 0.5038700283320365

Correlation coefficient: 0.7098380296462261

Test data - unseen during training:

R<sup>2</sup> score: 0.5844087903682672

Correlation coefficient: 0.764466343515702

[7.74409401 6.07894667 7.0773428 7.61926673 7.7602434 7.99556239

```

8.15221908 7.76267828 8.0206463 7.61619051 6.59362476 7.43512479
7.44585341 7.7392973 8.00563276 8.0043966 6.6259373 5.75141239]
102    7.698970
38     5.986741
8      5.984515
109    7.886057
11     7.962574
51     7.698970
88     8.229148
21     7.298432
82     8.065502
98     7.376751
58     7.602060
64     8.060481
74     7.853872
103    7.853872
91     8.346787
43     7.619789
25     4.989276
30     6.085657

```

Name: BALB/3T3, dtype: float64

Training Root Mean Square Error: 0.6112341502878809

Testing Root Mean Square Error: 0.5929205581098148

```

[38]: print(target_column_name+str('_transformed'))
      print(hist1[target_column_name].hist())

```

BALB/3T3\_transformed

AxesSubplot(0.125,0.11;0.775x0.77)



```
[39]: with_standardization, train_r2_, test_r2_, hist1, hist2, target_column_name,
      ↪ training_data_RMSE, test_data_RMSE = pred_model.
      ↪ prepare_data_and_create_model(molecular_descriptors_df=data,
      ↪
      ↪         correlation_threshold=0.50,
      ↪
      ↪         standardization=True,
      ↪
      ↪         model_type='SVR',
      ↪
      ↪         kernel_ = 'linear',
      ↪
      ↪         gamma_ = 'auto',
      ↪
      ↪         target_column_name = target,
      ↪
      ↪         random_state=random_state,
      ↪
      ↪         train_test_split_=True,
      ↪
      ↪         verbose=True)
```

I am doing standardization...

molecular descriptor name

|   |          |
|---|----------|
| 0 | AATSOZ   |
| 1 | AATSOare |
| 2 | AATSOd   |
| 3 | AATSOdv  |
| 4 | AATSOi   |

|   | molecular descriptor name | corr_value |
|---|---------------------------|------------|
| 0 | AATSOZ                    | -0.020817  |
| 1 | AATSOare                  | -0.148257  |
| 2 | AATSOd                    | 0.022999   |
| 3 | AATSOdv                   | -0.137980  |
| 4 | AATSOi                    | 0.133257   |

|   | molecular descriptor name | corr_value | absolute correlation value |
|---|---------------------------|------------|----------------------------|
| 0 | AATSOZ                    | -0.020817  | 0.020817                   |
| 1 | AATSOare                  | -0.148257  | 0.148257                   |
| 2 | AATSOd                    | 0.022999   | 0.022999                   |
| 3 | AATSOdv                   | -0.137980  | 0.137980                   |
| 4 | AATSOi                    | 0.133257   | 0.133257                   |

|     | molecular descriptor name | corr_value | absolute correlation value |
|-----|---------------------------|------------|----------------------------|
| 226 | AMID_O                    | -0.546843  | 0.546843                   |
| 505 | EState_VSA5               | -0.588780  | 0.588780                   |
| 556 | GATS2c                    | 0.511671   | 0.511671                   |
| 791 | MDEO-12                   | -0.582747  | 0.582747                   |
| 847 | NdO                       | -0.500462  | 0.500462                   |

|     | molecular descriptor name | corr_value | absolute correlation value |
|-----|---------------------------|------------|----------------------------|
| 226 | AMID_O                    | -0.546843  | 0.546843                   |
| 505 | EState_VSA5               | -0.588780  | 0.588780                   |
| 556 | GATS2c                    | 0.511671   | 0.511671                   |
| 791 | MDEO-12                   | -0.582747  | 0.582747                   |
| 847 | NdO                       | -0.500462  | 0.500462                   |

The model used is: SVR...

Return the coefficient of determination of the prediction:

0.5844087903682672

R<sup>2</sup> score: 0.5038700283320365

Correlation coefficient: 0.7098380296462261

Test data - unseen during training:

R<sup>2</sup> score: 0.5844087903682672

Correlation coefficient: 0.764466343515702

[7.74409401 6.07894667 7.0773428 7.61926673 7.7602434 7.99556239  
8.15221908 7.76267828 8.0206463 7.61619051 6.59362476 7.43512479  
7.44585341 7.7392973 8.00563276 8.0043966 6.6259373 5.75141239]

|     |          |
|-----|----------|
| 102 | 7.698970 |
| 38  | 5.986741 |
| 8   | 5.984515 |
| 109 | 7.886057 |
| 11  | 7.962574 |
| 51  | 7.698970 |

```

88      8.229148
21      7.298432
82      8.065502
98      7.376751
58      7.602060
64      8.060481
74      7.853872
103     7.853872
91      8.346787
43      7.619789
25      4.989276
30      6.085657
Name: BALB/3T3, dtype: float64
Training Root Mean Square Error: 0.6112341502878809
Testing Root Mean Square Error: 0.5929205581098148

```

## 5.1 Search inside correlation space

```

[40]: step = 0.01
      initial_step = corr_low
      last_step = corr_high
      first_list = [x / 100.0 for x in range(int(initial_step*100),
      ↪int(last_step*100), int(step*100))]
      second_list = []
      third_list = []
      fourth_l = []
      fifth_l = []
      f_list = []
      for i in first_list:
          without_standardization, train_r2, test_r2, _, h_, target_column_name,
          ↪training_data_RMSE, test_data_RMSE = pred_model.
          ↪prepare_data_and_create_model(molecular_descriptors_df = data,

          ↪
          ↪correlation_threshold = i,
          ↪
          ↪standardization = False,
          ↪
          ↪model_type = 'SVR',
          ↪
          ↪kernel_ = 'linear',
          ↪
          ↪gamma_ = 'auto',
          ↪
          ↪target_column_name = target,
          ↪
          ↪random_state=random_state,

```

```

    ↪          train_test_split_ = True,

    ↪          verbose = False)
second_list.append(train_r2)
third_list.append(test_r2)
fourth_l.append(training_data_RMSE)
fifth_l.append(test_data_RMSE)
f_list.append(len(h_))

```

```

[41]: df_without_standardization = pd.DataFrame(data=first_list,
    ↪columns=["Correlation threshold"])
df_without_standardization['Training data R^2 score'] = second_list
df_without_standardization['Test data R^2 score'] = third_list
df_without_standardization['Training RMSE'] = fourth_l
df_without_standardization['Test RMSE'] = fifth_l
df_without_standardization['Number of features'] = f_list

```

```

[42]: df_svm = df_without_standardization.copy()
df_without_standardization

```

```

[42]:
Correlation threshold  Training data R^2 score  Test data R^2 score  \
0                    0.33                    0.758706          0.762230
1                    0.34                    0.673499          0.697317
2                    0.35                    0.680598          0.680201
3                    0.36                    0.685819          0.688987
4                    0.37                    0.683062          0.702495
5                    0.38                    0.673122          0.655446
6                    0.39                    0.661432          0.665519
7                    0.40                    0.654452          0.685718
8                    0.41                    0.620802          0.726820
9                    0.42                    0.597357          0.675935
10                   0.43                    0.585465          0.676336
11                   0.44                    0.578861          0.624502
12                   0.45                    0.560153          0.583720
13                   0.46                    0.560947          0.581063
14                   0.47                    0.556380          0.559649
15                   0.48                    0.539267          0.634048
16                   0.49                    0.527182          0.626409
17                   0.50                    0.503870          0.584409
18                   0.51                    0.480646          0.561896
19                   0.52                    0.483042          0.567314
20                   0.53                    0.454180          0.543126
21                   0.54                    0.454180          0.543126
22                   0.55                    0.452892          0.538185
23                   0.56                    0.452892          0.538185

```



|    | Training RMSE | Test RMSE | Number of features |
|----|---------------|-----------|--------------------|
| 0  | 0.426269      | 0.448478  | 83                 |
| 1  | 0.495852      | 0.506008  | 70                 |
| 2  | 0.490432      | 0.520118  | 64                 |
| 3  | 0.486407      | 0.512923  | 59                 |
| 4  | 0.488536      | 0.501661  | 55                 |
| 5  | 0.496138      | 0.539873  | 51                 |
| 6  | 0.504932      | 0.531923  | 46                 |
| 7  | 0.510110      | 0.515612  | 41                 |
| 8  | 0.534371      | 0.480715  | 32                 |
| 9  | 0.550643      | 0.523576  | 28                 |
| 10 | 0.558715      | 0.523251  | 23                 |
| 11 | 0.563148      | 0.563595  | 21                 |
| 12 | 0.575520      | 0.593412  | 17                 |
| 13 | 0.575000      | 0.595302  | 16                 |
| 14 | 0.577983      | 0.610328  | 15                 |
| 15 | 0.589026      | 0.556385  | 14                 |
| 16 | 0.596701      | 0.562162  | 10                 |
| 17 | 0.611234      | 0.592921  | 7                  |
| 18 | 0.625377      | 0.608768  | 6                  |
| 19 | 0.623932      | 0.604992  | 5                  |
| 20 | 0.641113      | 0.621673  | 3                  |
| 21 | 0.641113      | 0.621673  | 3                  |
| 22 | 0.641869      | 0.625025  | 2                  |
| 23 | 0.641869      | 0.625025  | 2                  |

## 5.2 Plots

```
[43]: plt.plot(df_without_standardization['Correlation threshold'],
             df_without_standardization['Training data R^2 score'], label = "Training
             data R^2 score", marker='v')
plt.plot(df_without_standardization['Correlation threshold'],
             df_without_standardization['Test data R^2 score'], label = "Test data R^2
             score", marker='D')
plt.legend()
plt.xlabel('Correlation threshold')
plt.ylabel('R^2 score')
plt.ylim([0, 1])
plt.show()
```

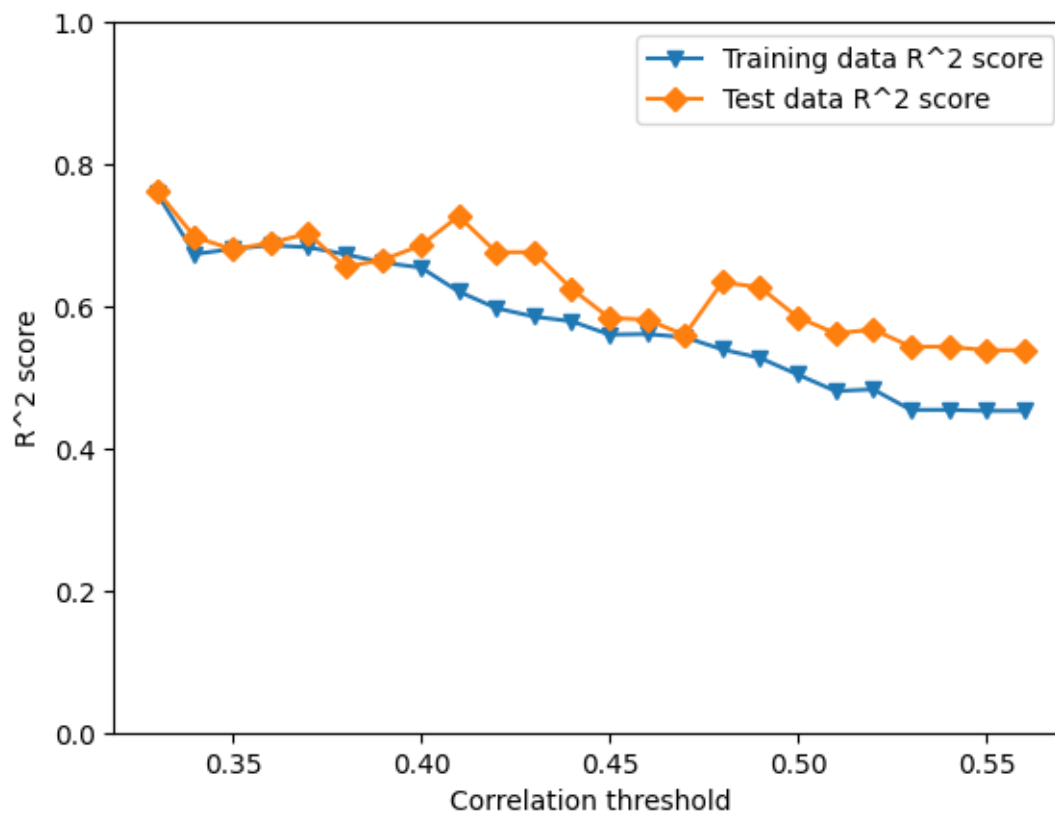

```
[44]: plt.plot(df_without_standardization['Correlation threshold'],  
             df_without_standardization['Number of features'], label = "Number of  
             features", marker='.')  
plt.legend()  
plt.xlabel('Correlation threshold')  
plt.ylabel('Number of features')  
plt.show()
```

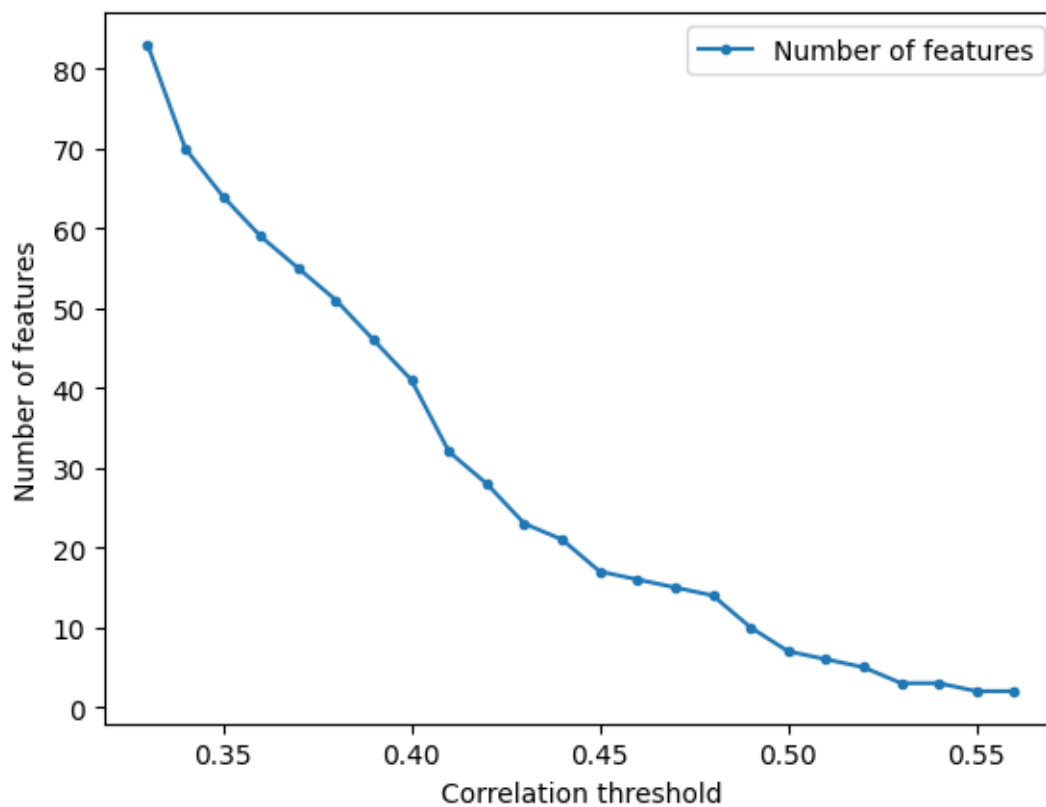

### 5.3 Store quality measurements

```
[45]: with pd.ExcelWriter('../Data/Quality_'+BALB_3T3+'_'+str(random_state)+'_'.  
      ↪xlsx') as writer:  
      df_linear.to_excel(writer, sheet_name='MLR')  
      df_decision_tree.to_excel(writer, sheet_name='DT')  
      df_random_forest.to_excel(writer, sheet_name='RF')  
      df_k_nearest.to_excel(writer, sheet_name='KNN')  
      df_svm.to_excel(writer, sheet_name='SVM')
```

# Notebook

January 18, 2024

## 1 File 19

```
[1]: import sys
from pathlib import Path
prediction_mode_path = Path("../module")
sys.path.append(prediction_mode_path.as_posix())
import models_creation as pred_model

import pandas as pd
import numpy as np

from sklearn.metrics import r2_score

import matplotlib.pyplot as plt
from sklearn.tree import plot_tree

from matplotlib import pyplot as plt

import joblib

import warnings
warnings.filterwarnings('ignore')
```

```
[2]: load_prepared_data = pd.read_excel('../Data/Kolchicyna_machine_learning.xlsx')
load_prepared_data = load_prepared_data.drop(columns=['Unnamed: 0'])

target = 'BALB/3T3'

corr_low = 0.33
corr_high = 0.58

random_state = 28
```

```
[3]: load_prepared_data.head()
```

```
[3]:
```

|   | AATSOZ    | AATSOare | AATSOd   | AATSOdv  | AATSOi     | AATSOm    | AATSOp   | \ |
|---|-----------|----------|----------|----------|------------|-----------|----------|---|
| 0 | 25.090909 | 6.046518 | 3.109091 | 6.662626 | 160.775045 | 99.075564 | 1.555512 |   |
| 1 | 24.448276 | 6.008422 | 3.051724 | 6.386973 | 161.021674 | 96.473315 | 1.538471 |   |

|   |           |          |          |          |            |           |          |
|---|-----------|----------|----------|----------|------------|-----------|----------|
| 2 | 23.868852 | 5.974074 | 3.000000 | 6.138434 | 161.244045 | 94.127025 | 1.523105 |
| 3 | 23.868852 | 5.974074 | 3.032787 | 6.171220 | 161.244045 | 94.127025 | 1.523105 |
| 4 | 23.343750 | 5.942945 | 2.953125 | 5.913194 | 161.445569 | 92.000700 | 1.509180 |

|   | AATS0pe  | AATS0s   | AATS0se  | ... | A549_float | MCF-7_float | LoVo_float | \ |
|---|----------|----------|----------|-----|------------|-------------|------------|---|
| 0 | 6.126680 | 3.435416 | 7.629859 | ... | 10.8       | 10.3        | 6.5        |   |
| 1 | 6.088791 | 3.330998 | 7.596891 | ... | 11.6       | 12.0        | 8.5        |   |
| 2 | 6.054630 | 3.236850 | 7.567166 | ... | 10.9       | 12.2        | 8.8        |   |
| 3 | 6.054630 | 3.257798 | 7.567166 | ... | 10.5       | 11.3        | 8.5        |   |
| 4 | 6.023670 | 3.151529 | 7.540228 | ... | 89.5       | 92.7        | 52.8       |   |

|   | LoVo/DX_float | BALB/3T3_float | A549_float_transformed | \ |
|---|---------------|----------------|------------------------|---|
| 0 | 54.9          | 10.2           | 7.966576               |   |
| 1 | 31.1          | 14.3           | 7.935542               |   |
| 2 | 17.9          | 11.7           | 7.962574               |   |
| 3 | 10.2          | 11.0           | 7.978811               |   |
| 4 | 77.8          | 99.4           | 7.048177               |   |

|   | MCF-7_float_transformed | LoVo_float_transformed | LoVo/DX_float_transformed | \ |
|---|-------------------------|------------------------|---------------------------|---|
| 0 | 7.987163                | 8.187087               | 7.260428                  |   |
| 1 | 7.920819                | 8.070581               | 7.507240                  |   |
| 2 | 7.913640                | 8.055517               | 7.747147                  |   |
| 3 | 7.946922                | 8.070581               | 7.991400                  |   |
| 4 | 7.032920                | 7.277366               | 7.109020                  |   |

|   | BALB/3T3_float_transformed |
|---|----------------------------|
| 0 | 7.991400                   |
| 1 | 7.844664                   |
| 2 | 7.931814                   |
| 3 | 7.958607                   |
| 4 | 7.002614                   |

[5 rows x 1221 columns]

```
[4]: data = load_prepared_data[list(load_prepared_data.columns)[0:-10]]
data[target] = load_prepared_data[load_prepared_data.columns[-1]]
data.head()
```

|   | AATS0Z    | AATS0are | AATS0d   | AATS0dv  | AATS0i     | AATS0m    | AATS0p   | \ |
|---|-----------|----------|----------|----------|------------|-----------|----------|---|
| 0 | 25.090909 | 6.046518 | 3.109091 | 6.662626 | 160.775045 | 99.075564 | 1.555512 |   |
| 1 | 24.448276 | 6.008422 | 3.051724 | 6.386973 | 161.021674 | 96.473315 | 1.538471 |   |
| 2 | 23.868852 | 5.974074 | 3.000000 | 6.138434 | 161.244045 | 94.127025 | 1.523105 |   |
| 3 | 23.868852 | 5.974074 | 3.032787 | 6.171220 | 161.244045 | 94.127025 | 1.523105 |   |
| 4 | 23.343750 | 5.942945 | 2.953125 | 5.913194 | 161.445569 | 92.000700 | 1.509180 |   |

  

|   | AATS0pe  | AATS0s   | AATS0se  | ... | piPC10   | piPC2    | piPC3    | piPC4    | \ |
|---|----------|----------|----------|-----|----------|----------|----------|----------|---|
| 0 | 6.126680 | 3.435416 | 7.629859 | ... | 7.999655 | 4.266195 | 4.915408 | 5.516700 |   |

|   |          |          |          |     |          |          |          |          |
|---|----------|----------|----------|-----|----------|----------|----------|----------|
| 1 | 6.088791 | 3.330998 | 7.596891 | ... | 8.018726 | 4.280132 | 4.922714 | 5.520711 |
| 2 | 6.054630 | 3.236850 | 7.567166 | ... | 8.028799 | 4.293878 | 4.929967 | 5.524706 |
| 3 | 6.054630 | 3.257798 | 7.567166 | ... | 8.037440 | 4.307438 | 4.929967 | 5.524706 |
| 4 | 6.023670 | 3.151529 | 7.540228 | ... | 8.034892 | 4.307438 | 4.937168 | 5.528685 |

|   | piPC5    | piPC6    | piPC7    | piPC8    | piPC9    | BALB/3T3 |
|---|----------|----------|----------|----------|----------|----------|
| 0 | 6.098566 | 6.595759 | 6.979116 | 7.337313 | 7.681445 | 7.991400 |
| 1 | 6.103048 | 6.601209 | 6.985613 | 7.349442 | 7.695531 | 7.844664 |
| 2 | 6.105281 | 6.603923 | 6.989306 | 7.353932 | 7.704023 | 7.931814 |
| 3 | 6.107510 | 6.606629 | 6.992068 | 7.361425 | 7.709420 | 7.958607 |
| 4 | 6.107510 | 6.605277 | 6.991148 | 7.356489 | 7.707175 | 7.002614 |

[5 rows x 1212 columns]

## 2 Multiple Linear regression (MLR)

```
[5]: without_standardization, train_r2_, test_r2_, hist1, hist2, target_column_name,
      ↪ training_data_RMSE, test_data_RMSE = pred_model.
      ↪ prepare_data_and_create_model(molecular_descriptors_df=data,
      ↪
      ↪ correlation_threshold=0.5,
      ↪
      ↪ standardization=False,
      ↪
      ↪ model_type='linear_model',
      ↪
      ↪ target_column_name = str(target),
      ↪
      ↪ random_state=random_state,
      ↪
      ↪ train_test_split_=True,
      ↪
      ↪ verbose=True)
```

I am not doing standardization...

|   | molecular descriptor name | corr_value |
|---|---------------------------|------------|
| 0 | AATS0Z                    | -0.020817  |
| 1 | AATS0are                  | -0.148257  |
| 2 | AATS0d                    | 0.022999   |
| 3 | AATS0dv                   | -0.137980  |

|     |                           |            |                            |
|-----|---------------------------|------------|----------------------------|
| 4   | AATSOi                    | 0.133257   |                            |
|     | molecular descriptor name | corr_value | absolute correlation value |
| 0   | AATSOZ                    | -0.020817  | 0.020817                   |
| 1   | AATSOare                  | -0.148257  | 0.148257                   |
| 2   | AATSOd                    | 0.022999   | 0.022999                   |
| 3   | AATSOdv                   | -0.137980  | 0.137980                   |
| 4   | AATSOi                    | 0.133257   | 0.133257                   |
|     | molecular descriptor name | corr_value | absolute correlation value |
| 226 | AMID_0                    | -0.546843  | 0.546843                   |
| 505 | EState_VSA5               | -0.588780  | 0.588780                   |
| 556 | GATS2c                    | 0.511671   | 0.511671                   |
| 791 | MDEO-12                   | -0.582747  | 0.582747                   |
| 847 | NdO                       | -0.500462  | 0.500462                   |
|     | molecular descriptor name | corr_value | absolute correlation value |
| 226 | AMID_0                    | -0.546843  | 0.546843                   |
| 505 | EState_VSA5               | -0.588780  | 0.588780                   |
| 556 | GATS2c                    | 0.511671   | 0.511671                   |
| 791 | MDEO-12                   | -0.582747  | 0.582747                   |
| 847 | NdO                       | -0.500462  | 0.500462                   |

The model used is: LinearReg..

Return the coefficient of determination of the prediction:

0.4531410949770688

R<sup>2</sup> score: 0.5600891898540288

Correlation coefficient: 0.7483910674600738

Test data - unseen during training:

R<sup>2</sup> score: 0.4531410949770688

Correlation coefficient: 0.6731575558344932

[7.54593608 6.20014013 7.43354052 6.38485025 7.69492011 7.32564568  
7.54054595 7.60386062 6.64019847 7.41310329 7.64890537 7.69020105  
7.7755592 7.20107755 7.33180425 6.22650972 7.86818438 6.4947382 ]

113 7.744727  
35 6.149967  
101 6.958607  
36 6.346787  
100 7.000000  
13 7.966576  
0 7.991400  
114 7.443697  
104 7.823909  
96 7.677781  
40 7.795880  
103 7.853872  
48 7.744727  
39 8.221849  
14 6.414314  
117 5.886057  
21 7.298432  
9 5.971266

Name: BALB/3T3, dtype: float64  
Training Root Mean Square Error: 0.5942890554179852  
Testing Root Mean Square Error: 0.553300668506696

```
[6]: print(target_column_name+str('_transformed'))  
      print(hist1[target_column_name].hist())
```

BALB/3T3\_transformed  
AxesSubplot(0.125,0.11;0.775x0.77)



```
[7]: with_standardization, train_r2_, test_r2_, hist1, hist2, target_column_name,   
      ↪ training_data_RMSE, test_data_RMSE = pred_model.  
      ↪ prepare_data_and_create_model(molecular_descriptors_df=data,  
  
      ↪ correlation_threshold=0.50,  
  
      ↪ standardization=True,  
  
      ↪ model_type='linear_model',  
  
      ↪ target_column_name = target,
```



```

↪          random_state=random_state,
↪          train_test_split_=True,
↪          verbose=True)

```

I am doing standardization...

molecular descriptor name

```

0          AATSOZ
1          AATSOare
2          AATSOd
3          AATSOdv
4          AATSOi

```

|   | molecular descriptor name | corr_value |
|---|---------------------------|------------|
| 0 | AATSOZ                    | -0.020817  |
| 1 | AATSOare                  | -0.148257  |
| 2 | AATSOd                    | 0.022999   |
| 3 | AATSOdv                   | -0.137980  |
| 4 | AATSOi                    | 0.133257   |

|   | molecular descriptor name | corr_value | absolute correlation value |
|---|---------------------------|------------|----------------------------|
| 0 | AATSOZ                    | -0.020817  | 0.020817                   |
| 1 | AATSOare                  | -0.148257  | 0.148257                   |
| 2 | AATSOd                    | 0.022999   | 0.022999                   |
| 3 | AATSOdv                   | -0.137980  | 0.137980                   |
| 4 | AATSOi                    | 0.133257   | 0.133257                   |

|     | molecular descriptor name | corr_value | absolute correlation value |
|-----|---------------------------|------------|----------------------------|
| 226 | AMID_0                    | -0.546843  | 0.546843                   |
| 505 | EState_VSA5               | -0.588780  | 0.588780                   |
| 556 | GATS2c                    | 0.511671   | 0.511671                   |
| 791 | MDEO-12                   | -0.582747  | 0.582747                   |
| 847 | NdO                       | -0.500462  | 0.500462                   |

|     | molecular descriptor name | corr_value | absolute correlation value |
|-----|---------------------------|------------|----------------------------|
| 226 | AMID_0                    | -0.546843  | 0.546843                   |
| 505 | EState_VSA5               | -0.588780  | 0.588780                   |
| 556 | GATS2c                    | 0.511671   | 0.511671                   |
| 791 | MDEO-12                   | -0.582747  | 0.582747                   |
| 847 | NdO                       | -0.500462  | 0.500462                   |

The model used is: LinearReg..

Return the coefficient of determination of the prediction:

0.4531410949770688

R<sup>2</sup> score: 0.5600891898540288

Correlation coefficient: 0.7483910674600738

Test data - unseen during training:

R<sup>2</sup> score: 0.4531410949770688

Correlation coefficient: 0.6731575558344932

[7.54593608 6.20014013 7.43354052 6.38485025 7.69492011 7.32564568

```

7.54054595 7.60386062 6.64019847 7.41310329 7.64890537 7.69020105
7.7755592 7.20107755 7.33180425 6.22650972 7.86818438 6.4947382 ]
113      7.744727
35       6.149967
101      6.958607
36       6.346787
100      7.000000
13       7.966576
0        7.991400
114      7.443697
104      7.823909
96       7.677781
40       7.795880
103      7.853872
48       7.744727
39       8.221849
14       6.414314
117      5.886057
21       7.298432
9        5.971266
Name: BALB/3T3, dtype: float64
Training Root Mean Square Error: 0.5942890554179852
Testing Root Mean Square Error: 0.553300668506696

```

## 2.1 Search inside correlation space

```

[8]: step = 0.01
initial_step = corr_low
last_step = corr_high
first_list = [x / 100.0 for x in range(int(initial_step*100),
↪int(last_step*100), int(step*100))]
second_list = []
third_list = []
fourth_l = []
fifth_l = []
f_list = []
for i in first_list:
    without_standardization, train_r2, test_r2, _, h_, target_column_name,
↪training_data_RMSE, test_data_RMSE = pred_model.
↪prepare_data_and_create_model(molecular_descriptors_df = data,

↪
                                correlation_threshold = i,

↪
                                standardization = False,

↪
                                model_type = 'linear_model',

```

```

    ↪          target_column_name = target,

    ↪          random_state=random_state,

    ↪          train_test_split_ = True,

    ↪          verbose = False)
second_list.append(train_r2)
third_list.append(test_r2)
fourth_l.append(training_data_RMSE)
fifth_l.append(test_data_RMSE)
f_list.append(len(h_))

```

```

[9]: df_without_standardization = pd.DataFrame(data=first_list,
    ↪columns=["Correlation threshold"])
df_without_standardization['Training data R^2 score'] = second_list
df_without_standardization['Test data R^2 score'] = third_list
df_without_standardization['Training RMSE'] = fourth_l
df_without_standardization['Test RMSE'] = fifth_l
df_without_standardization['Number of features'] = f_list

```

```

[10]: df_linear = df_without_standardization.copy()
df_without_standardization

```

```

[10]:
Correlation threshold  Training data R^2 score  Test data R^2 score  \
0                    0.33                    0.986965          -5.823141
1                    0.34                    0.947580          -3.372261
2                    0.35                    0.937728          -0.239517
3                    0.36                    0.931313           0.007546
4                    0.37                    0.919148          -0.404108
5                    0.38                    0.880120          -0.293754
6                    0.39                    0.840043          -0.260312
7                    0.40                    0.822495          -0.128123
8                    0.41                    0.774976          -0.001020
9                    0.42                    0.714224           0.121483
10                   0.43                    0.688240           0.287600
11                   0.44                    0.684284           0.294614
12                   0.45                    0.644202           0.328652
13                   0.46                    0.644094           0.330996
14                   0.47                    0.643028           0.324173
15                   0.48                    0.636882           0.374617
16                   0.49                    0.601034           0.356643
17                   0.50                    0.560089           0.453141
18                   0.51                    0.551430           0.375287
19                   0.52                    0.549509           0.374704
20                   0.53                    0.514778           0.451642

```

|    |      |          |          |
|----|------|----------|----------|
| 21 | 0.54 | 0.514778 | 0.451642 |
| 22 | 0.55 | 0.483583 | 0.522604 |
| 23 | 0.56 | 0.483583 | 0.522604 |

|    | Training RMSE | Test RMSE | Number of features |
|----|---------------|-----------|--------------------|
| 0  | 0.102298      | 1.954410  | 83                 |
| 1  | 0.205146      | 1.564504  | 70                 |
| 2  | 0.223595      | 0.833009  | 64                 |
| 3  | 0.234829      | 0.745382  | 59                 |
| 4  | 0.254777      | 0.886592  | 55                 |
| 5  | 0.310234      | 0.851039  | 51                 |
| 6  | 0.358358      | 0.839968  | 46                 |
| 7  | 0.377504      | 0.794697  | 41                 |
| 8  | 0.425040      | 0.748592  | 32                 |
| 9  | 0.478992      | 0.701292  | 28                 |
| 10 | 0.500294      | 0.631518  | 23                 |
| 11 | 0.503459      | 0.628401  | 21                 |
| 12 | 0.534462      | 0.613052  | 17                 |
| 13 | 0.534543      | 0.611981  | 16                 |
| 14 | 0.535344      | 0.615094  | 15                 |
| 15 | 0.539932      | 0.591693  | 14                 |
| 16 | 0.565957      | 0.600136  | 10                 |
| 17 | 0.594289      | 0.553301  | 7                  |
| 18 | 0.600109      | 0.591376  | 6                  |
| 19 | 0.601393      | 0.591652  | 5                  |
| 20 | 0.624145      | 0.554058  | 3                  |
| 21 | 0.624145      | 0.554058  | 3                  |
| 22 | 0.643896      | 0.516967  | 2                  |
| 23 | 0.643896      | 0.516967  | 2                  |

```
[ ]:
```

## 2.2 Plots

```
[11]: plt.plot(df_without_standardization['Correlation threshold'],
             df_without_standardization['Training data R^2 score'], label = "Training
             data R^2 score", marker='v')
plt.plot(df_without_standardization['Correlation threshold'],
             df_without_standardization['Test data R^2 score'], label = "Test data R^2
             score", marker='D')
plt.legend()
plt.xlabel('Correlation threshold')
plt.ylabel('R^2 score')
plt.ylim([0, 1])
plt.show()
```

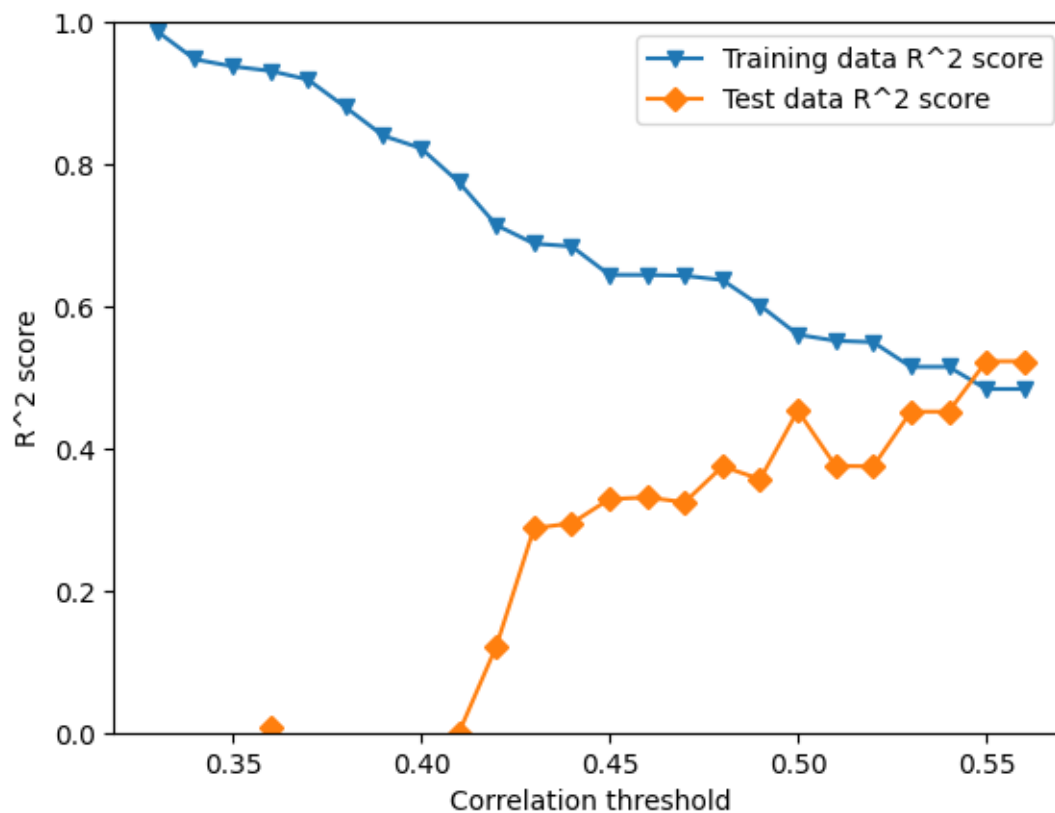

```
[12]: plt.plot(df_without_standardization['Correlation threshold'],  
             df_without_standardization['Number of features'], label = "Number of  
             features", marker='.')  
plt.legend()  
plt.xlabel('Correlation threshold')  
plt.ylabel('Number of features')  
plt.show()
```



[ ]:

## 2.3 Decision Tree

```
[13]: without_standardization, train_r2_, test_r2_, hist1, hist2, target_column_name,
      ↪ training_data_RMSE, test_data_RMSE = pred_model.
      ↪ prepare_data_and_create_model(molecular_descriptors_df=data,
      ↪
      ↪         correlation_threshold=0.50,
      ↪
      ↪         standardization=False,
      ↪
      ↪         model_type='DecisionTreeRegressor',
      ↪
      ↪         max_depth=5,
      ↪
      ↪         target_column_name = target,
      ↪
      ↪         random_state=random_state,
```

```

↪          train_test_split_=True,
↪          verbose=True)

```

I am not doing standardization...

```

molecular descriptor name
0          AATSOZ
1          AATSOare
2          AATSOd
3          AATSOdv
4          AATSOi
molecular descriptor name  corr_value
0          AATSOZ      -0.020817
1          AATSOare    -0.148257
2          AATSOd      0.022999
3          AATSOdv     -0.137980
4          AATSOi      0.133257
molecular descriptor name  corr_value  absolute correlation value
0          AATSOZ      -0.020817          0.020817
1          AATSOare    -0.148257          0.148257
2          AATSOd      0.022999          0.022999
3          AATSOdv     -0.137980          0.137980
4          AATSOi      0.133257          0.133257
molecular descriptor name  corr_value  absolute correlation value
226          AMID_0      -0.546843          0.546843
505          EState_VSA5 -0.588780          0.588780
556          GATS2c      0.511671          0.511671
791          MDEO-12     -0.582747          0.582747
847          NdO        -0.500462          0.500462
molecular descriptor name  corr_value  absolute correlation value
226          AMID_0      -0.546843          0.546843
505          EState_VSA5 -0.588780          0.588780
556          GATS2c      0.511671          0.511671
791          MDEO-12     -0.582747          0.582747
847          NdO        -0.500462          0.500462
The model used is: DecisionTree...
Return the coefficient of determination of the prediction:
0.6154217227335051
R^2 score: 0.8628508546216089
Correlation coefficient: 0.9288976556228403
Test data - unseen during training:
R^2 score: 0.6154217227335051
Correlation coefficient: 0.7844881915832164
[7.73440408 6.56863624 7.73440408 6.56863624 7.73440408 6.84343546
 8.01954532 7.40431209 7.75277606 7.73440408 7.73440408 7.73440408
 7.73440408 7.73440408 6.84343546 5.92081875 7.10968583 6.84343546]
113      7.744727

```

```
35      6.149967
101     6.958607
36      6.346787
100     7.000000
13      7.966576
0       7.991400
114     7.443697
104     7.823909
96      7.677781
40      7.795880
103     7.853872
48      7.744727
39      8.221849
14      6.414314
117     5.886057
21      7.298432
9       5.971266
```

Name: BALB/3T3, dtype: float64

Training Root Mean Square Error: 0.331827188967237

Testing Root Mean Square Error: 0.4639978043847089

```
[14]: print(target_column_name+str('_transformed'))
      print(hist1[target_column_name].hist())
```

BALB/3T3\_transformed

AxesSubplot(0.125,0.11;0.775x0.77)





```
[15]: with_standardization, train_r2_, test_r2_, hist1, hist2, target_column_name,
      ↪ training_data_RMSE, test_data_RMSE = pred_model.
      ↪ prepare_data_and_create_model(molecular_descriptors_df=data,
      ↪
      ↪         correlation_threshold=0.50,
      ↪
      ↪         standardization=True,
      ↪
      ↪         model_type='DecisionTreeRegressor',
      ↪
      ↪         max_depth=5,
      ↪
      ↪         target_column_name = target,
      ↪
      ↪         random_state=random_state,
      ↪
      ↪         train_test_split_=True,
      ↪
      ↪         verbose=True)
```

I am doing standardization...  
molecular descriptor name

|     |                           |            |                            |
|-----|---------------------------|------------|----------------------------|
| 0   | AATSOZ                    |            |                            |
| 1   | AATSOare                  |            |                            |
| 2   | AATSOd                    |            |                            |
| 3   | AATSOdv                   |            |                            |
| 4   | AATSOi                    |            |                            |
|     | molecular descriptor name | corr_value |                            |
| 0   | AATSOZ                    | -0.020817  |                            |
| 1   | AATSOare                  | -0.148257  |                            |
| 2   | AATSOd                    | 0.022999   |                            |
| 3   | AATSOdv                   | -0.137980  |                            |
| 4   | AATSOi                    | 0.133257   |                            |
|     | molecular descriptor name | corr_value | absolute correlation value |
| 0   | AATSOZ                    | -0.020817  | 0.020817                   |
| 1   | AATSOare                  | -0.148257  | 0.148257                   |
| 2   | AATSOd                    | 0.022999   | 0.022999                   |
| 3   | AATSOdv                   | -0.137980  | 0.137980                   |
| 4   | AATSOi                    | 0.133257   | 0.133257                   |
|     | molecular descriptor name | corr_value | absolute correlation value |
| 226 | AMID_0                    | -0.546843  | 0.546843                   |
| 505 | EState_VSA5               | -0.588780  | 0.588780                   |
| 556 | GATS2c                    | 0.511671   | 0.511671                   |
| 791 | MDEO-12                   | -0.582747  | 0.582747                   |
| 847 | NdO                       | -0.500462  | 0.500462                   |
|     | molecular descriptor name | corr_value | absolute correlation value |
| 226 | AMID_0                    | -0.546843  | 0.546843                   |
| 505 | EState_VSA5               | -0.588780  | 0.588780                   |
| 556 | GATS2c                    | 0.511671   | 0.511671                   |
| 791 | MDEO-12                   | -0.582747  | 0.582747                   |
| 847 | NdO                       | -0.500462  | 0.500462                   |

The model used is: DecisionTree...

Return the coefficient of determination of the prediction:  
0.6154217227335051

R<sup>2</sup> score: 0.8628508546216089

Correlation coefficient: 0.9288976556228403

Test data - unseen during training:  
R<sup>2</sup> score: 0.6154217227335051

Correlation coefficient: 0.7844881915832164

[7.73440408 6.56863624 7.73440408 6.56863624 7.73440408 6.84343546  
8.01954532 7.40431209 7.75277606 7.73440408 7.73440408 7.73440408  
7.73440408 7.73440408 6.84343546 5.92081875 7.10968583 6.84343546]

|     |          |
|-----|----------|
| 113 | 7.744727 |
| 35  | 6.149967 |
| 101 | 6.958607 |
| 36  | 6.346787 |
| 100 | 7.000000 |
| 13  | 7.966576 |
| 0   | 7.991400 |
| 114 | 7.443697 |

```

104    7.823909
96    7.677781
40    7.795880
103    7.853872
48    7.744727
39    8.221849
14    6.414314
117    5.886057
21    7.298432
9     5.971266

```

Name: BALB/3T3, dtype: float64

Training Root Mean Square Error: 0.331827188967237

Testing Root Mean Square Error: 0.4639978043847089

## 2.4 Search inside correlation space

```

[16]: step = 0.01
initial_step = corr_low
last_step = corr_high
first_list = [x / 100.0 for x in range(int(initial_step*100),
    ↪ int(last_step*100), int(step*100))]
max_depth = [range(2, 30, 1)]
corr_th = []
second_list = []
third_list = []
fourth_l = []
fifth_l = []
f_list = []
fif_list = []
for i in first_list:
    for depth in max_depth[0]:

        without_standardization, train_r2, test_r2, _, h_, target_column_name,
    ↪ training_data_RMSE, test_data_RMSE = pred_model.
    ↪ prepare_data_and_create_model(molecular_descriptors_df=data,

    ↪ correlation_threshold=i,

    ↪ standardization=False,

    ↪ model_type='DecisionTreeRegressor',

    ↪ max_depth=depth,

    ↪ target_column_name = target,

    ↪ random_state=random_state,

```

```

↪          train_test_split_=True,
↪          verbose=False)
    corr_th.append(i)
    second_list.append(train_r2)
    third_list.append(test_r2)
    fourth_l.append(training_data_RMSE)
    fifth_l.append(test_data_RMSE)
    f_list.append(len(h_))
    fif_list.append(depth)

```

```

[17]: df_without_standardization = pd.DataFrame(data=corr_th, columns=["Correlation_
↪threshold"])
df_without_standardization['Training data R^2 score'] = second_list
df_without_standardization['Test data R^2 score'] = third_list
df_without_standardization['Training RMSE'] = fourth_l
df_without_standardization['Test RMSE'] = fifth_l
df_without_standardization['Number of features'] = f_list
df_without_standardization['Depth number'] = fif_list

```

```

[18]: df_decision_tree = df_without_standardization.copy()
      #df_without_standardization.to_excel('../Data/
      ↪A549_Decision_tree_rs_'+str(random_state)+'.xlsx')

```

## 2.5 Plots

```
[19]: corre_list = [x / 100.0 for x in range(int(initial_step*100),
    ↪int(last_step*100), int(0.01*100))]
for element in corre_list:
    element_ =
    ↪df_without_standardization[df_without_standardization['Correlation_
    ↪threshold'] == float(element)]
    plt.plot(element_['Depth number'], element_['Training data R^2 score'],
    ↪label = "Training data R^2 score", marker='v')
    plt.plot(element_['Depth number'], element_['Test data R^2 score'], label =
    ↪"Test data R^2 score", marker='D')
    plt.legend()
    plt.xlabel('Depth number -> correlation threshold: '+str(element)+'.'
    ↪Number of features: '+str(element_['Number of features'].iloc[0]),
    ↪fontweight='bold')
    plt.xlim(max(element_['Depth number'])+1, min(element_['Depth number'])-1)
    plt.ylabel('R^2 score')
    plt.ylim([0, 1])
    plt.rc('grid', linestyle="-. ", color='black')
    plt.grid(True)
    plt.show()
```

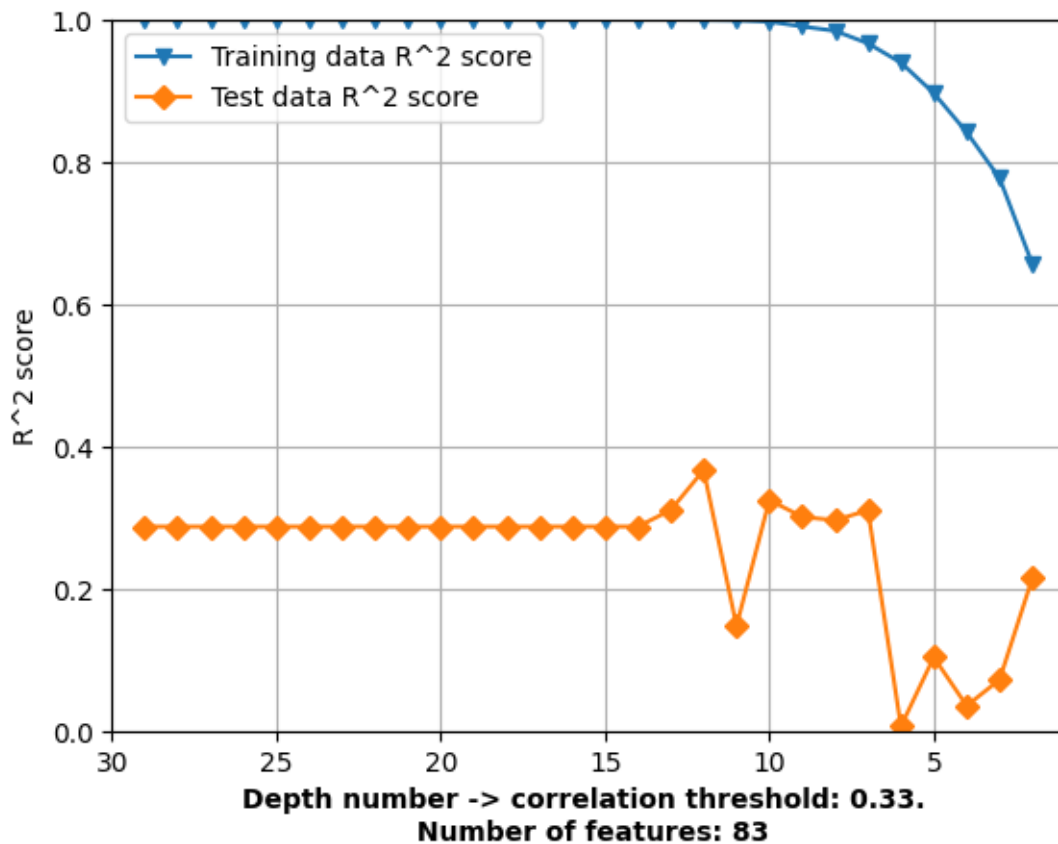

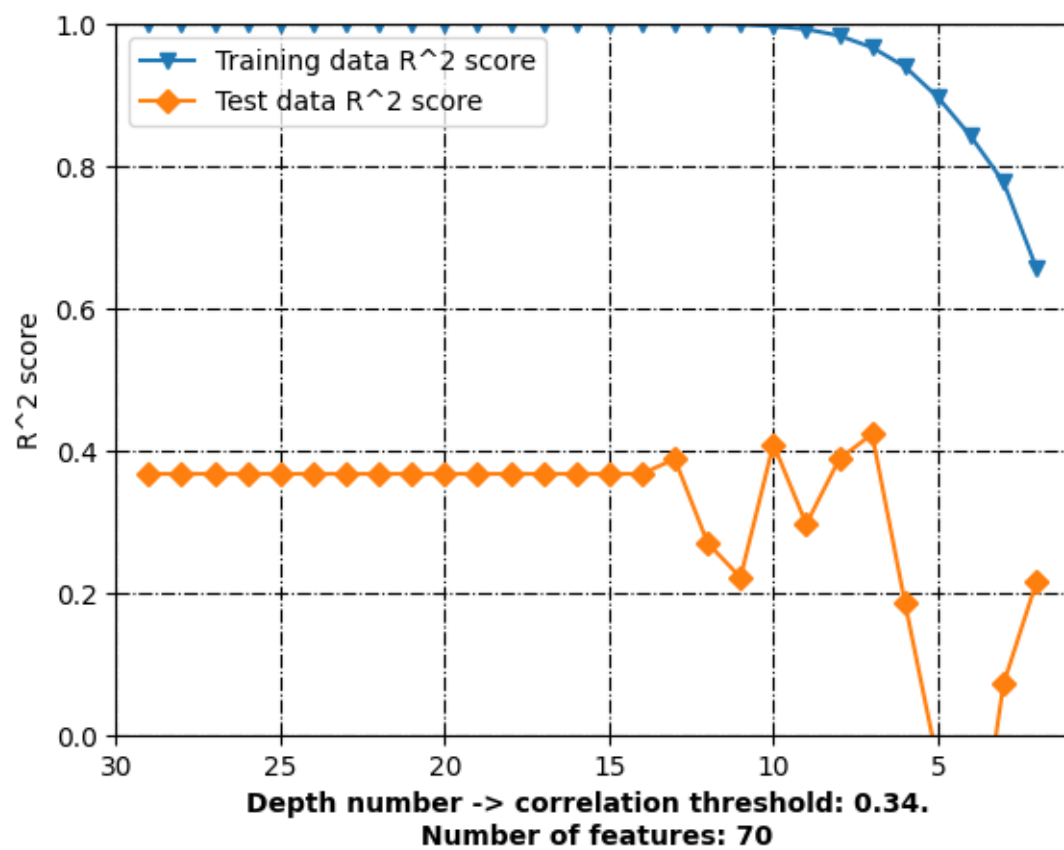

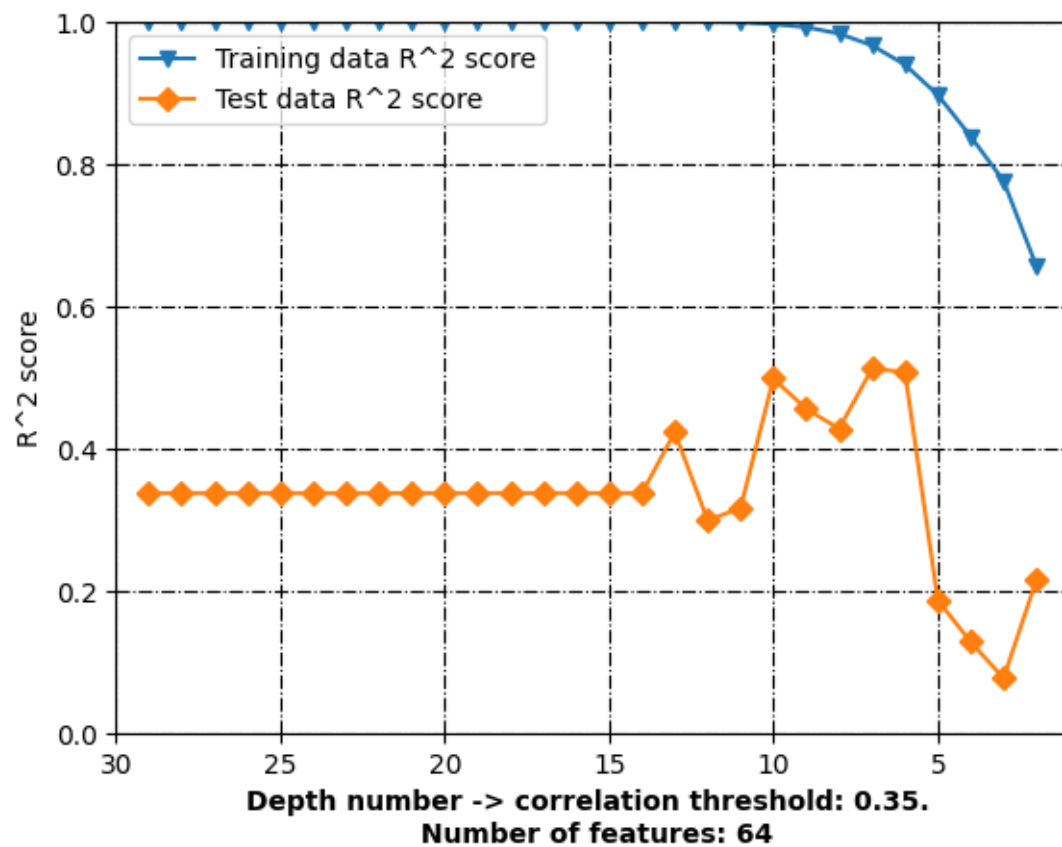

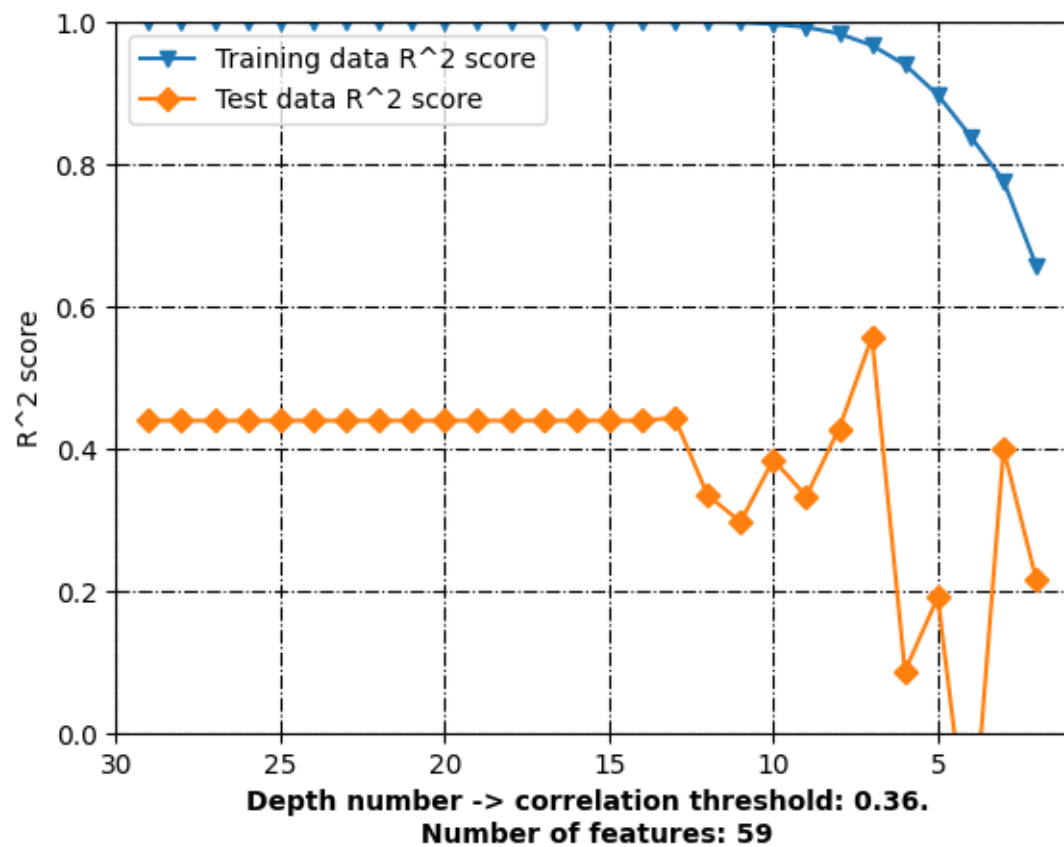



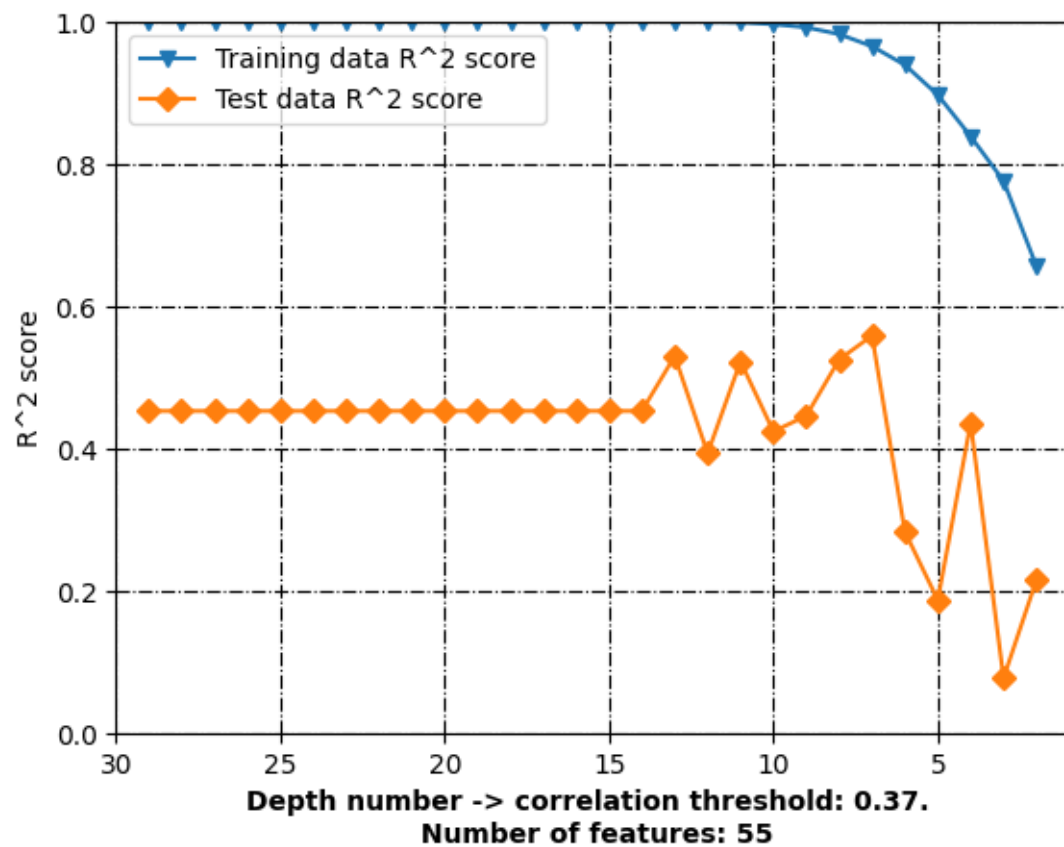

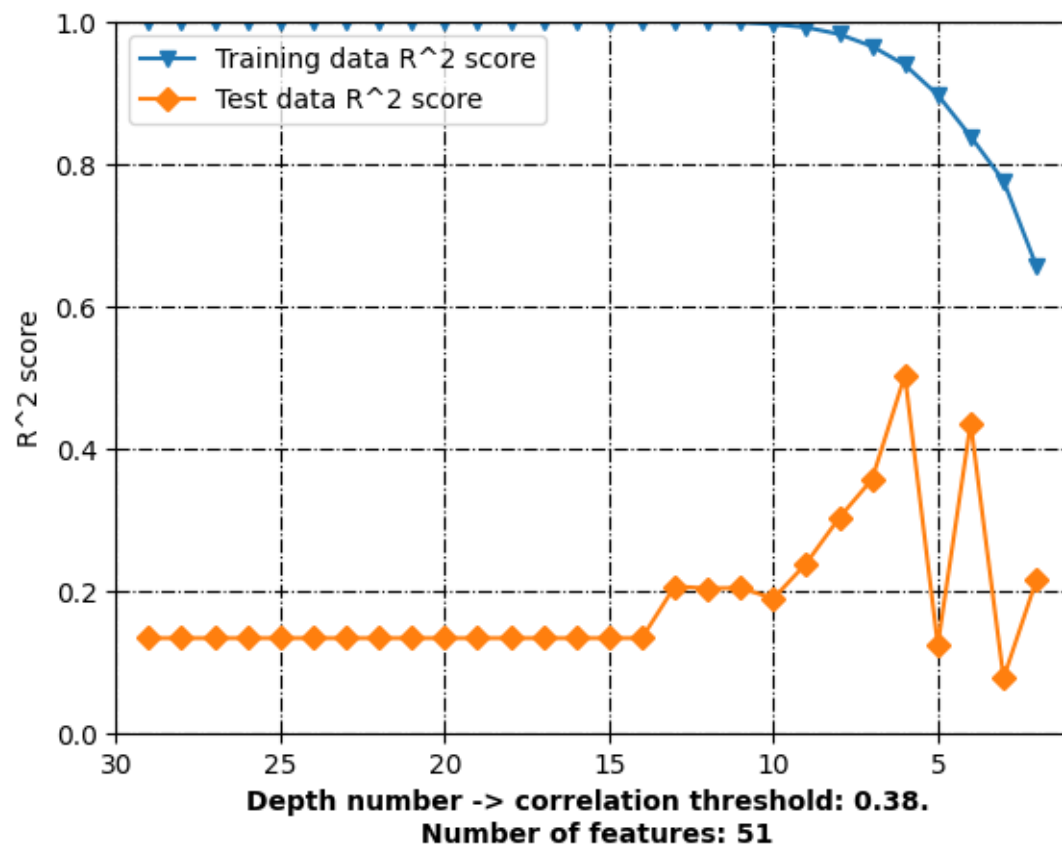

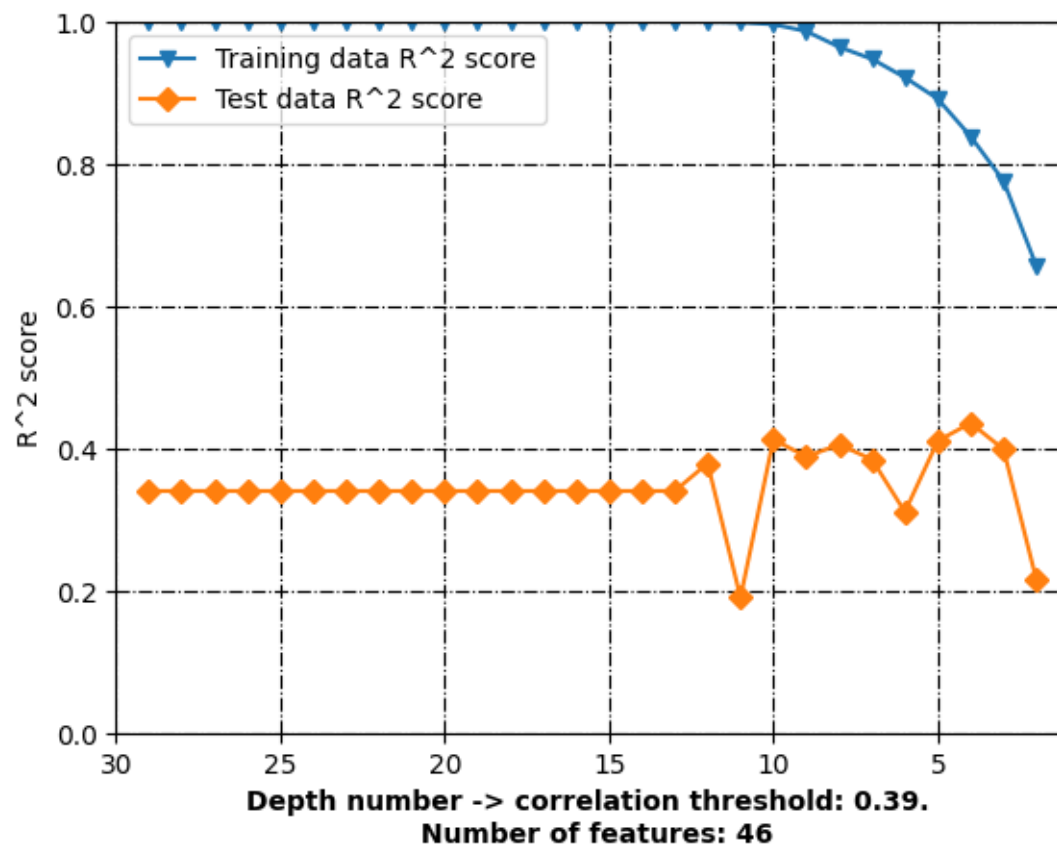

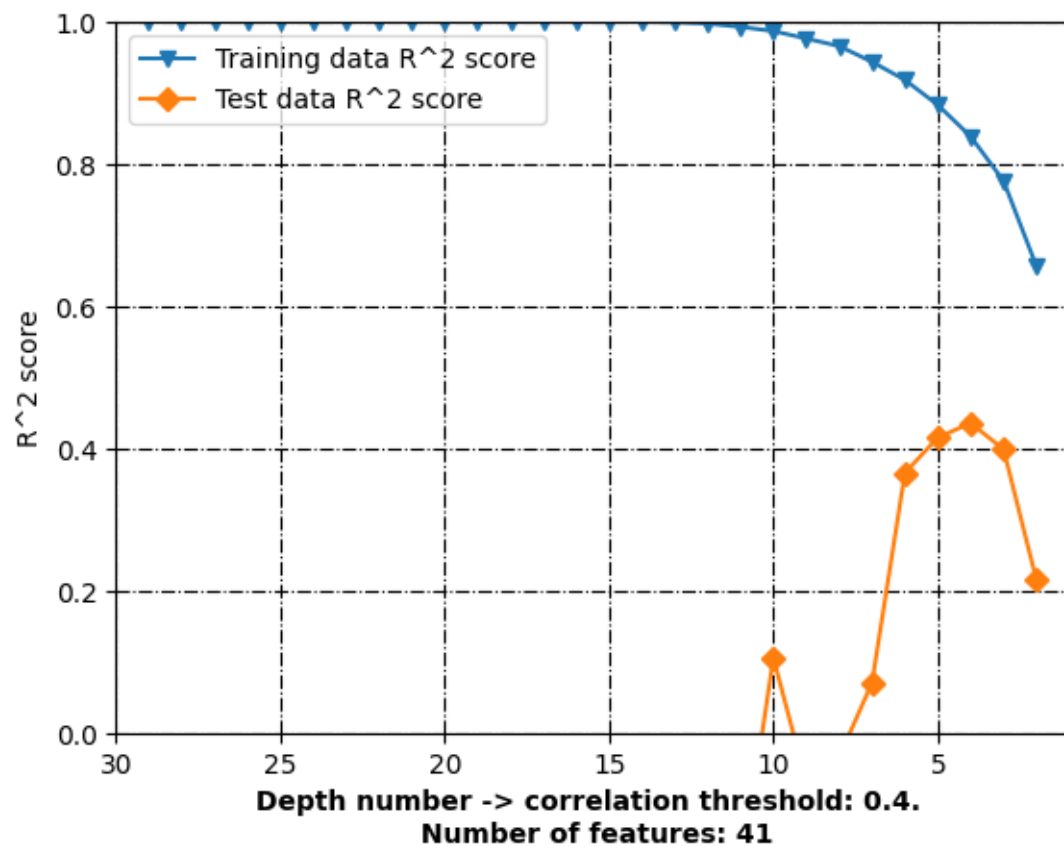

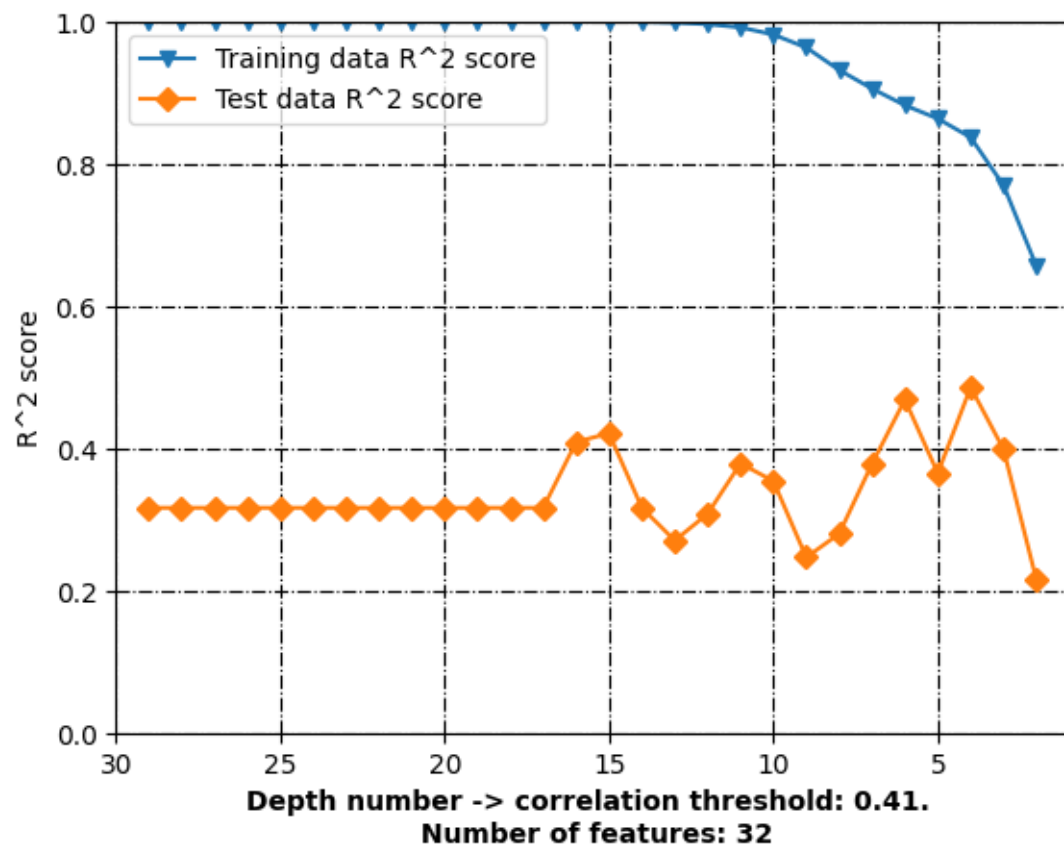

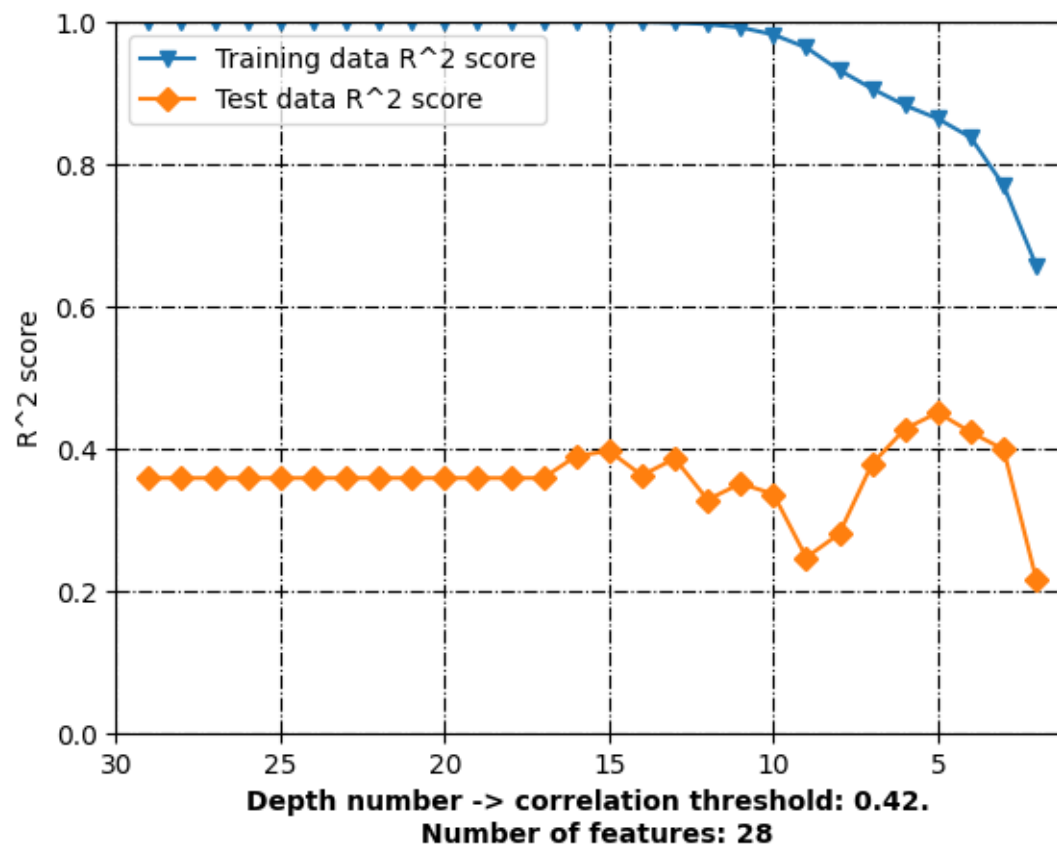

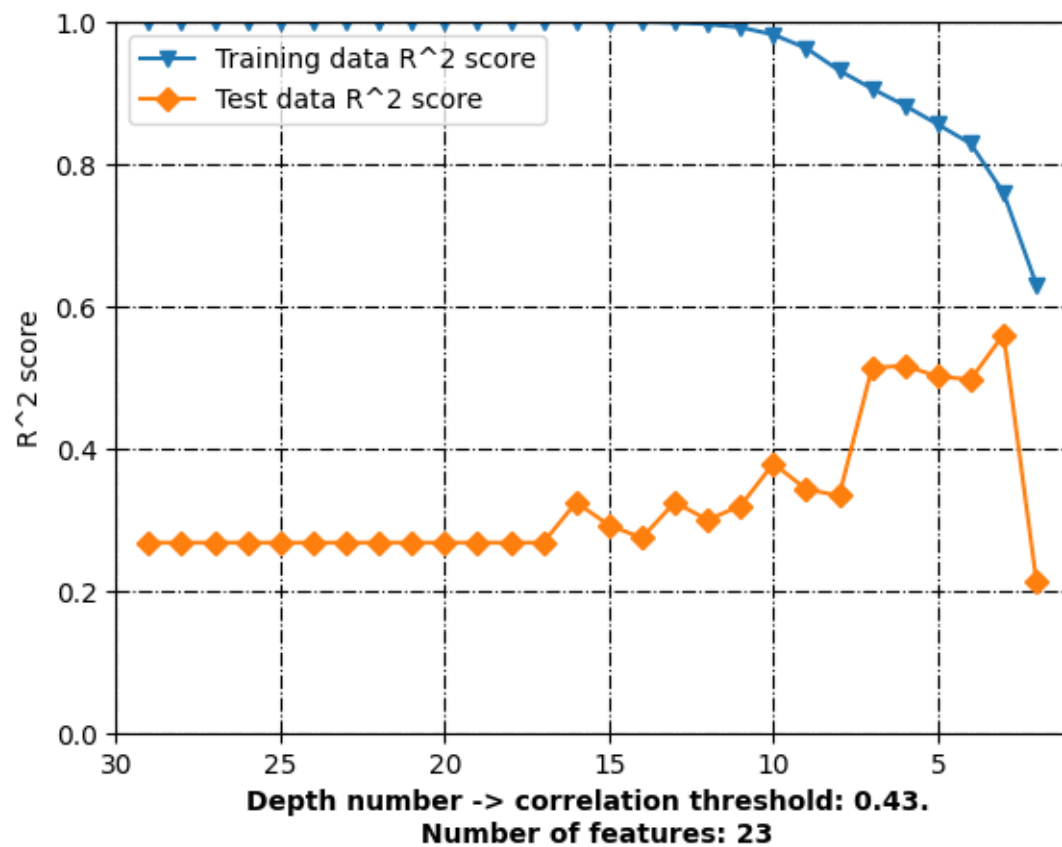

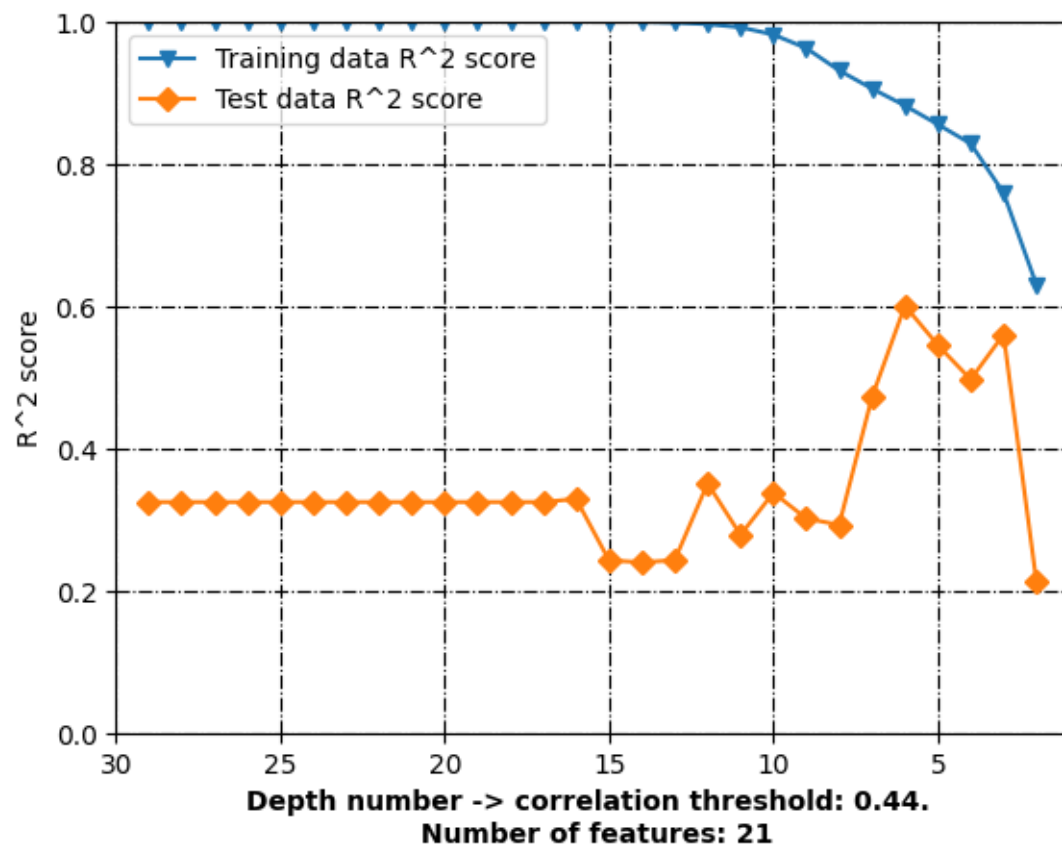



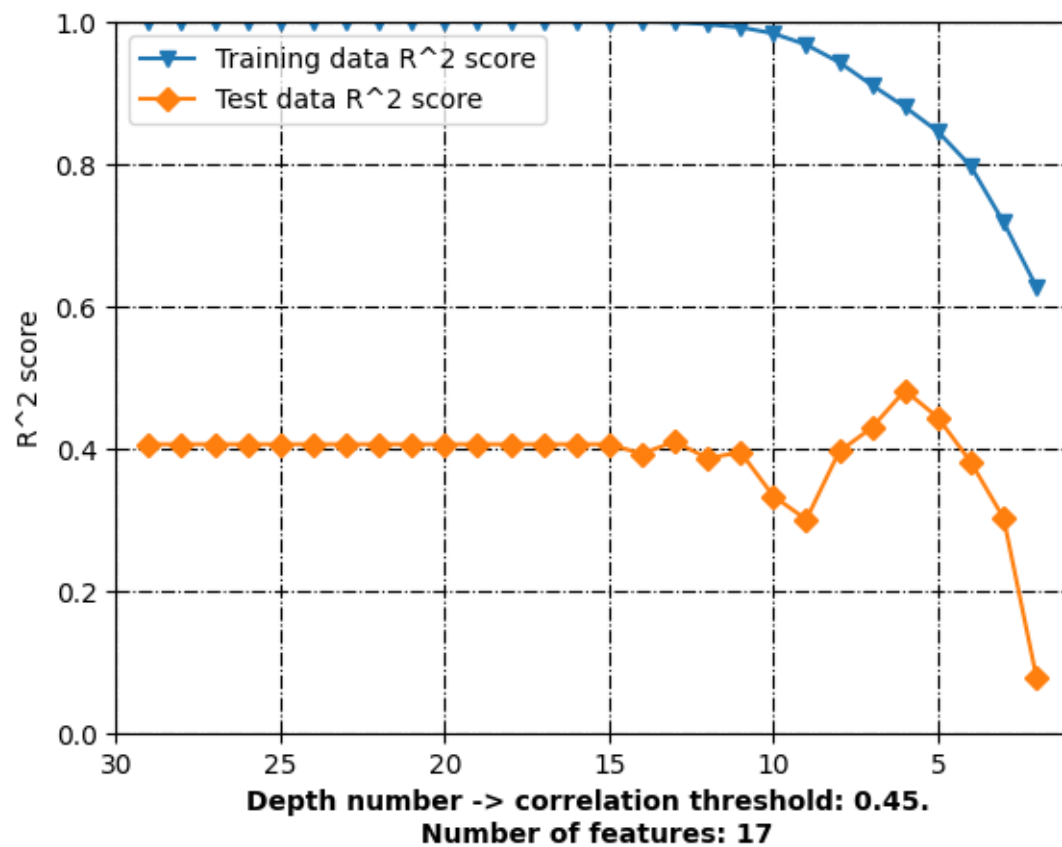

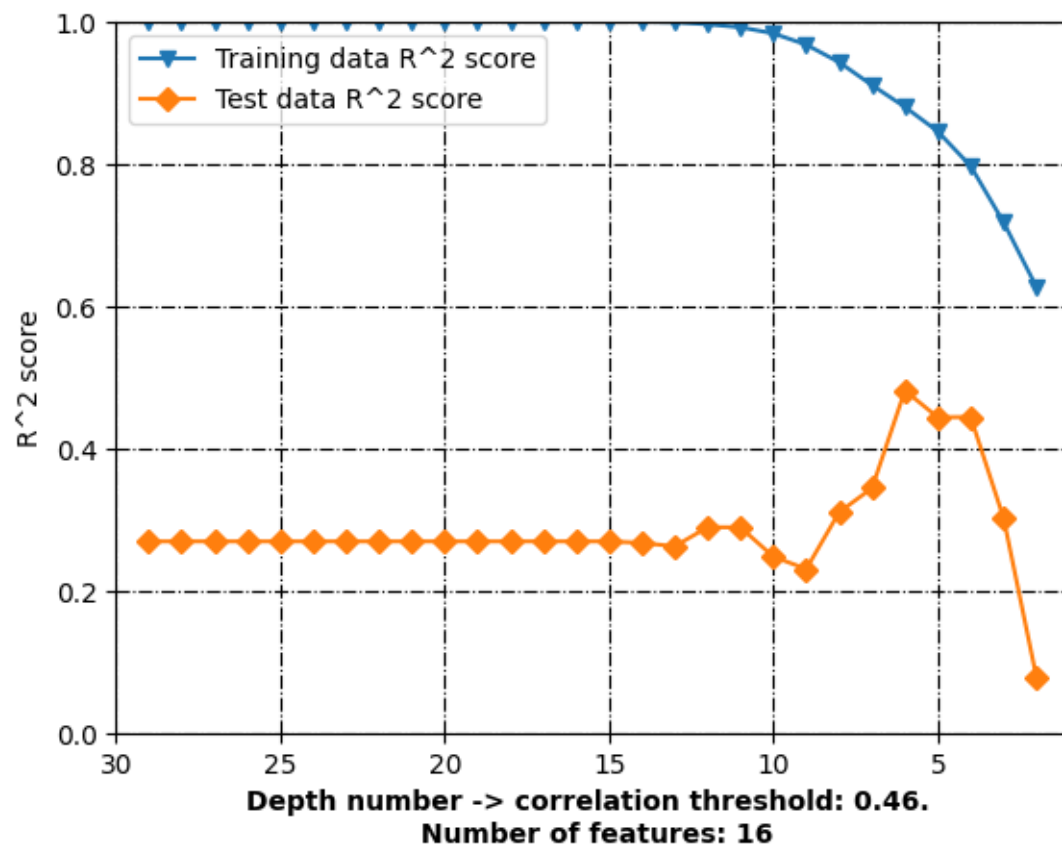

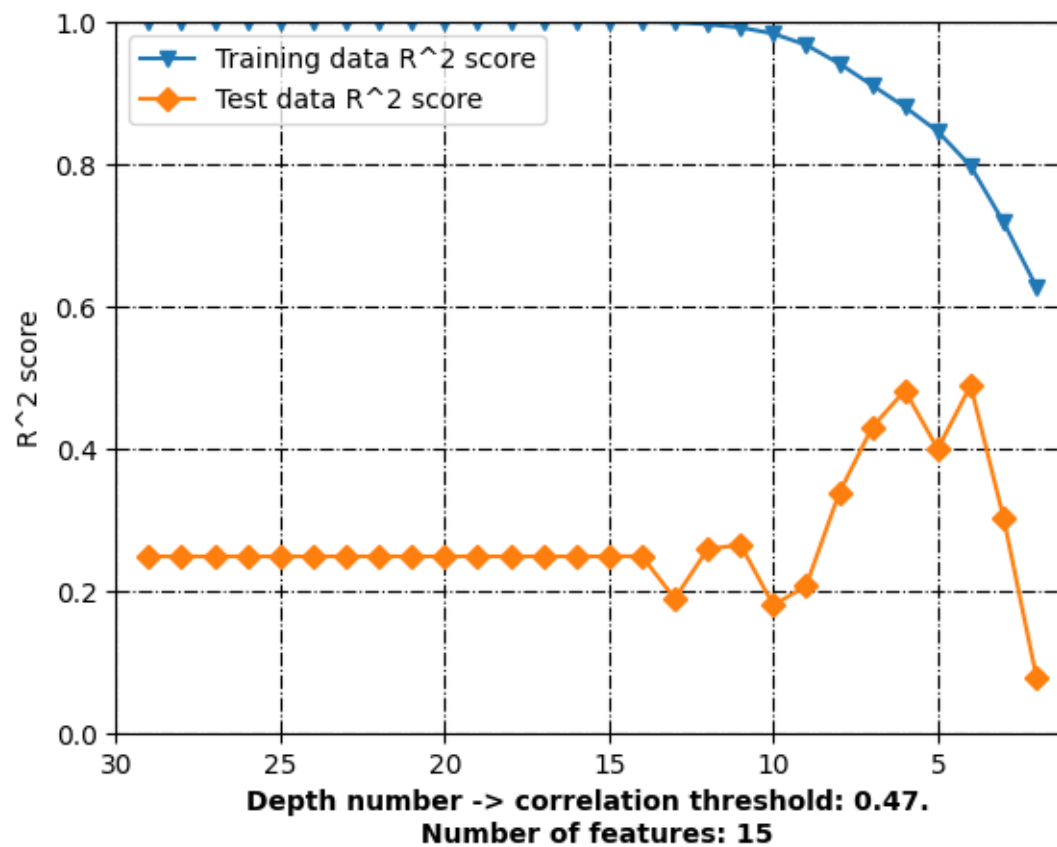

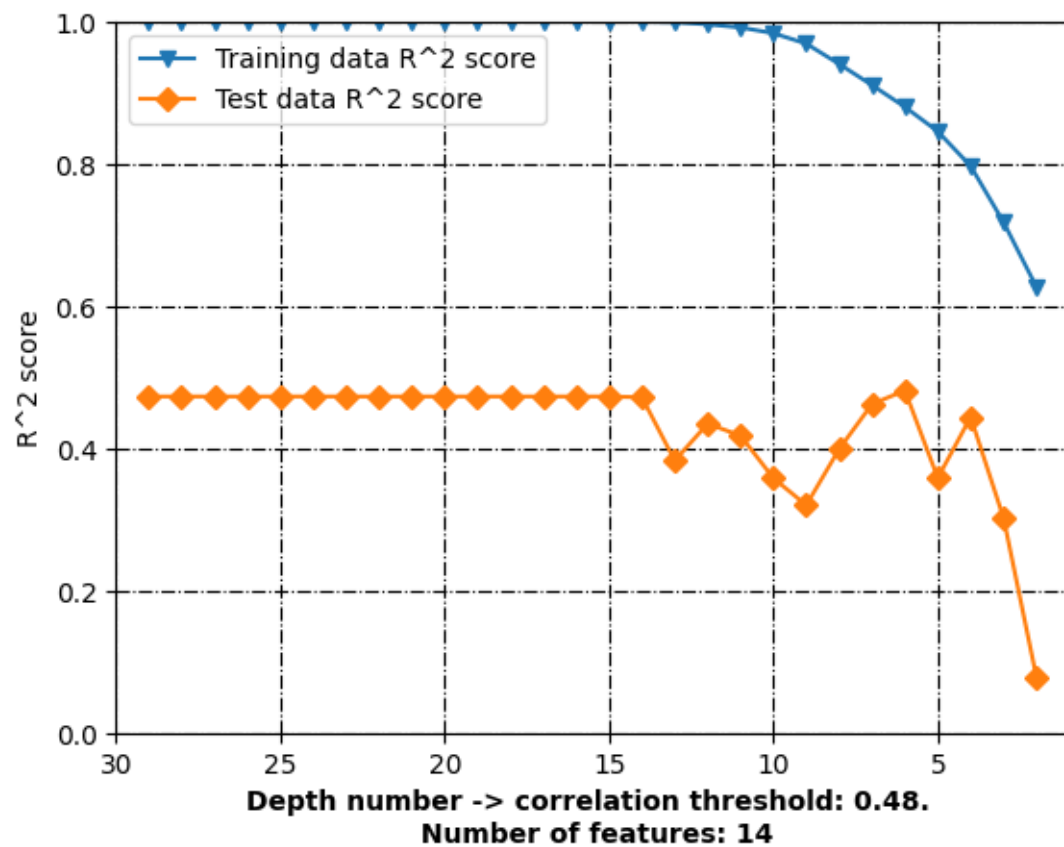

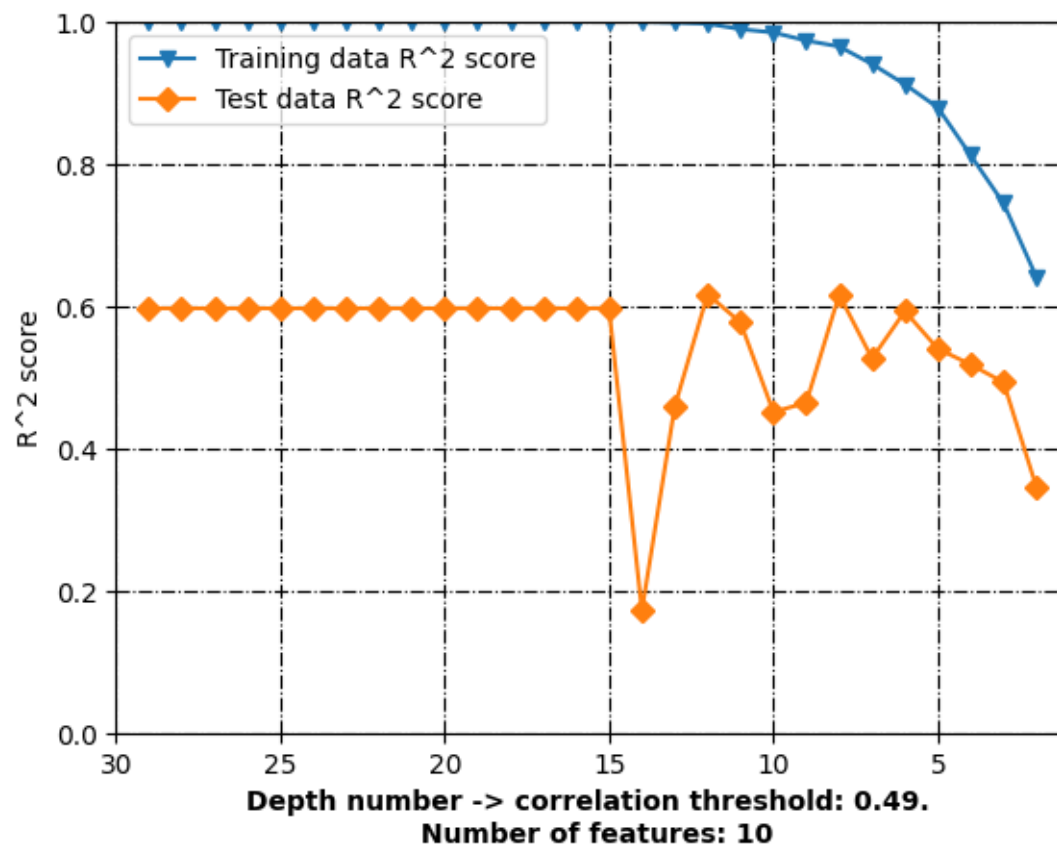

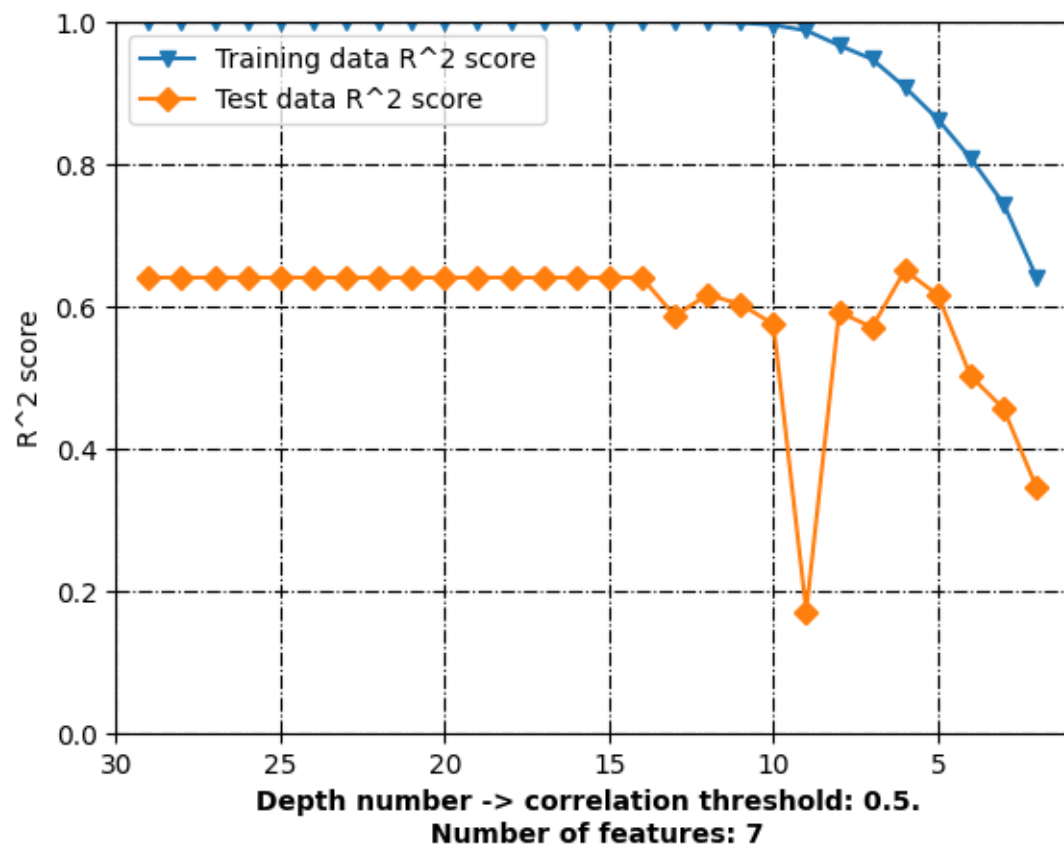

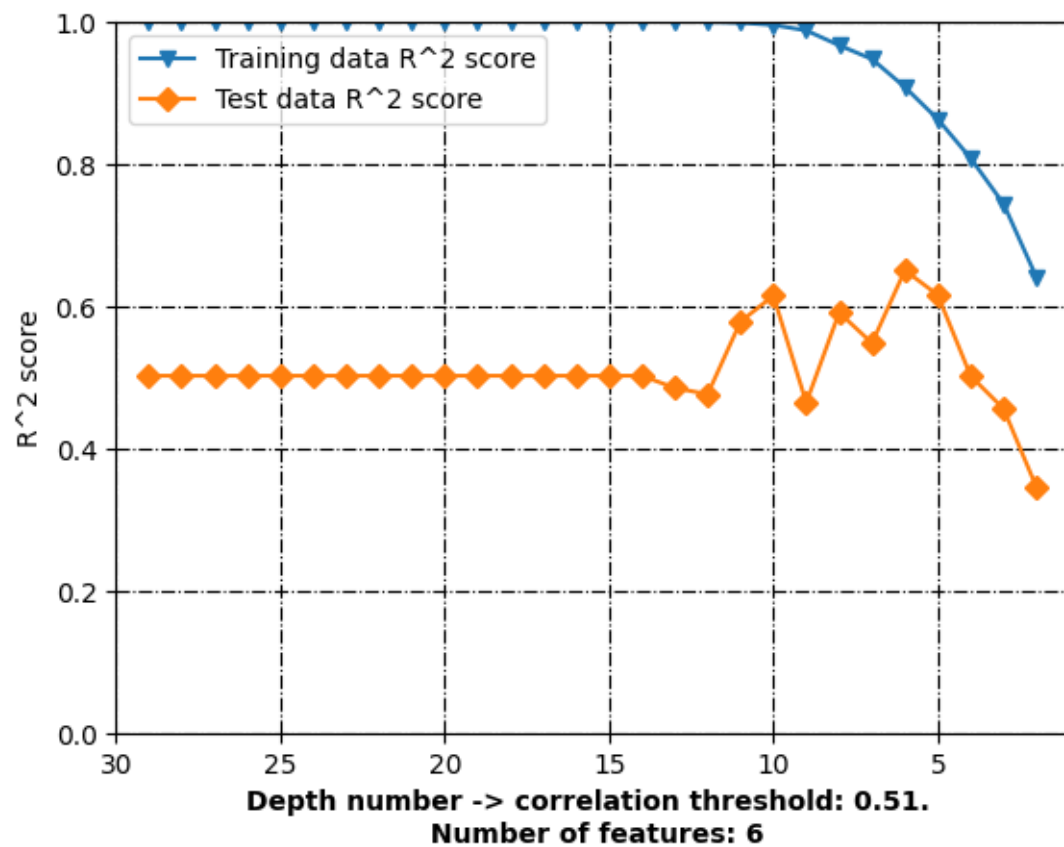

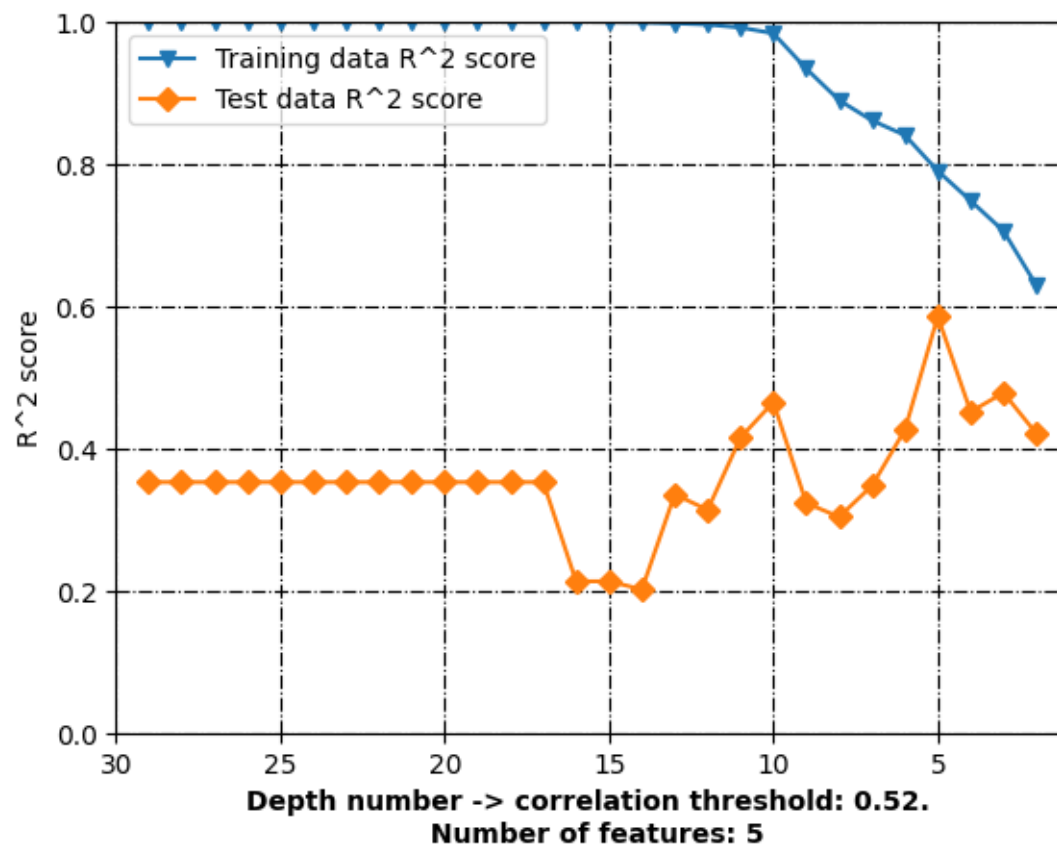



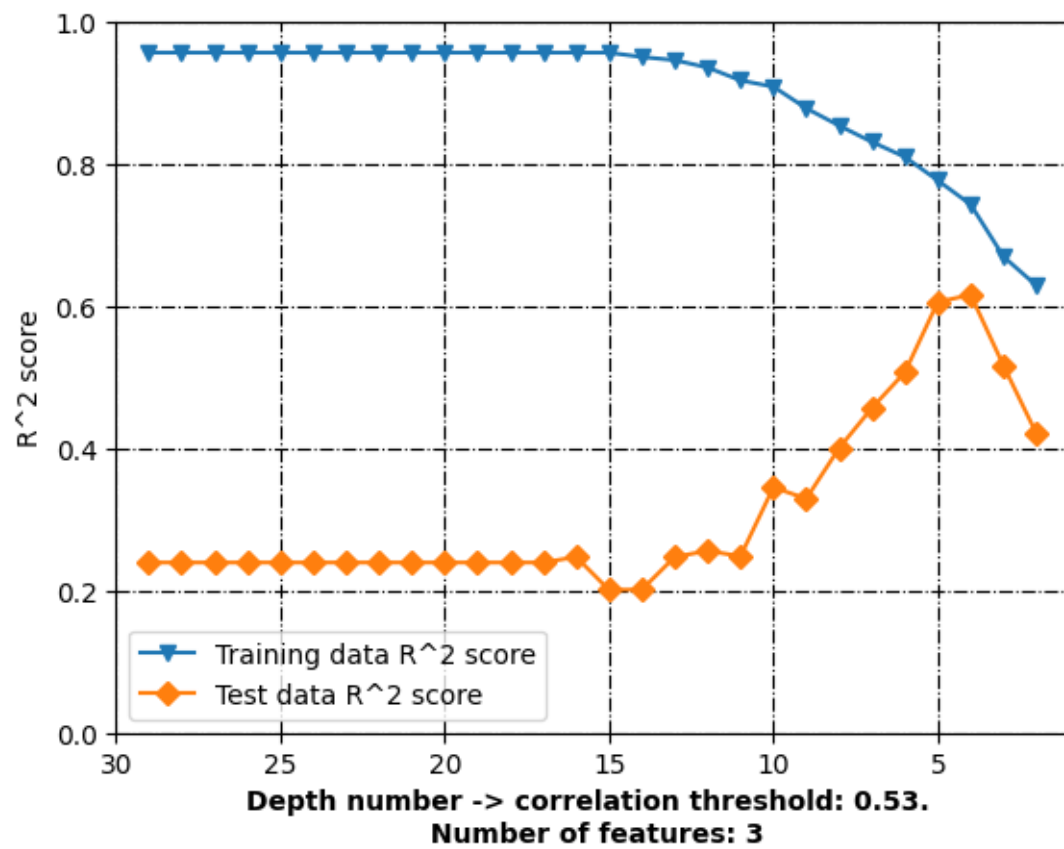

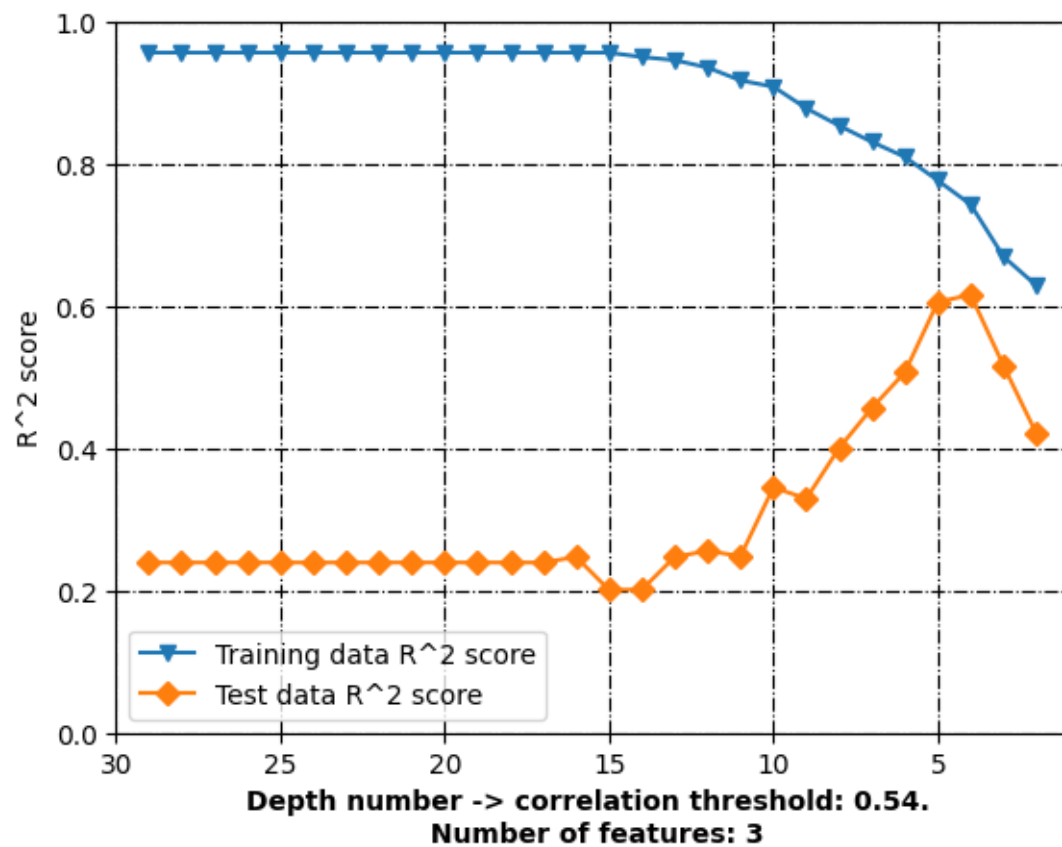

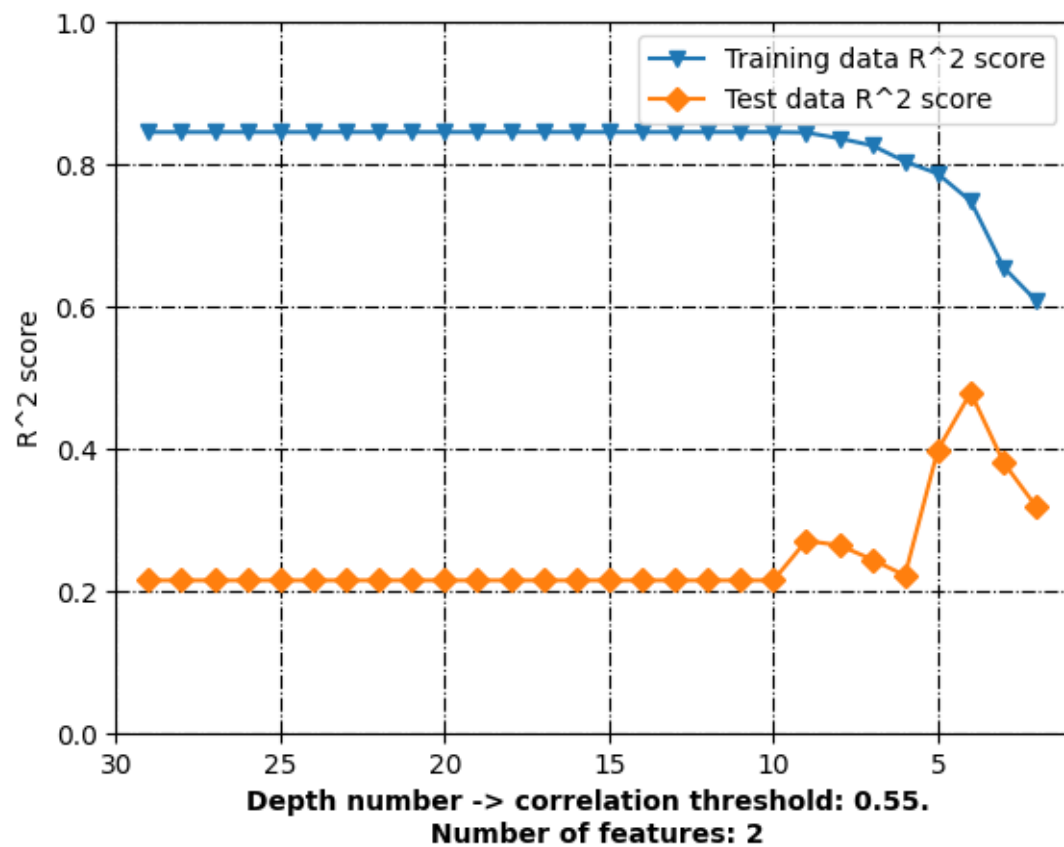

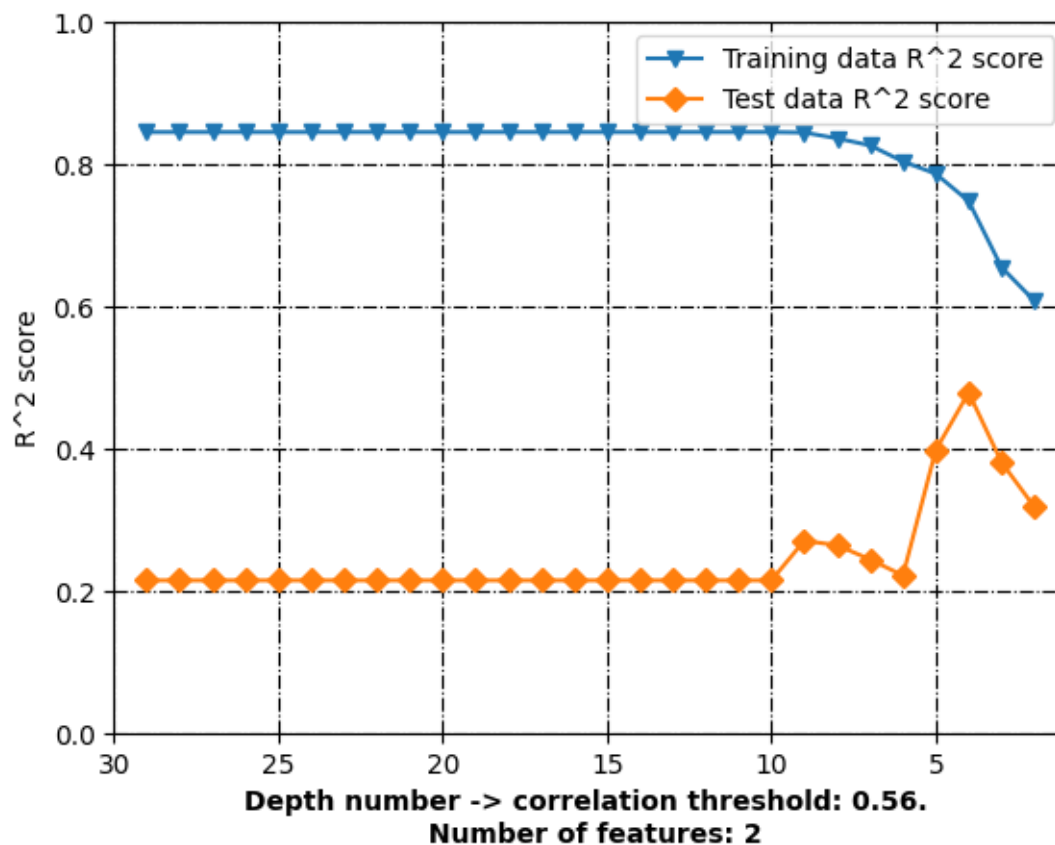

```
[20]: plt.plot(df_without_standardization['Correlation threshold'],  
             df_without_standardization['Number of features'], label = "Number of  
             features", marker='.')  
plt.legend()  
plt.xlabel('Correlation threshold')  
plt.ylabel('Number of features')  
plt.show()
```



[ ]:

### 3 Random Forest

```
[21]: without_standardization, train_r2_, test_r2_, hist1, hist2, target_column_name,
      ↪ training_data_RMSE, test_data_RMSE = pred_model.
      ↪ prepare_data_and_create_model(molecular_descriptors_df=data,
      ↪
      ↪         correlation_threshold=0.50,
      ↪
      ↪         standardization=False,
      ↪
      ↪         model_type='RandomForestRegressor',
      ↪
      ↪         n_estimators=12,
      ↪
      ↪         target_column_name = target,
      ↪
      ↪         random_state=random_state,
```

```

↪          train_test_split_=True,
↪          verbose=True)

```

I am not doing standardization...

|     | molecular descriptor name |            |                            |
|-----|---------------------------|------------|----------------------------|
| 0   | AATSOZ                    |            |                            |
| 1   | AATSOare                  |            |                            |
| 2   | AATSOd                    |            |                            |
| 3   | AATSOdv                   |            |                            |
| 4   | AATSOi                    |            |                            |
|     | molecular descriptor name | corr_value |                            |
| 0   | AATSOZ                    | -0.020817  |                            |
| 1   | AATSOare                  | -0.148257  |                            |
| 2   | AATSOd                    | 0.022999   |                            |
| 3   | AATSOdv                   | -0.137980  |                            |
| 4   | AATSOi                    | 0.133257   |                            |
|     | molecular descriptor name | corr_value | absolute correlation value |
| 0   | AATSOZ                    | -0.020817  | 0.020817                   |
| 1   | AATSOare                  | -0.148257  | 0.148257                   |
| 2   | AATSOd                    | 0.022999   | 0.022999                   |
| 3   | AATSOdv                   | -0.137980  | 0.137980                   |
| 4   | AATSOi                    | 0.133257   | 0.133257                   |
|     | molecular descriptor name | corr_value | absolute correlation value |
| 226 | AMID_0                    | -0.546843  | 0.546843                   |
| 505 | EState_VSA5               | -0.588780  | 0.588780                   |
| 556 | GATS2c                    | 0.511671   | 0.511671                   |
| 791 | MDEO-12                   | -0.582747  | 0.582747                   |
| 847 | NdO                       | -0.500462  | 0.500462                   |
|     | molecular descriptor name | corr_value | absolute correlation value |
| 226 | AMID_0                    | -0.546843  | 0.546843                   |
| 505 | EState_VSA5               | -0.588780  | 0.588780                   |
| 556 | GATS2c                    | 0.511671   | 0.511671                   |
| 791 | MDEO-12                   | -0.582747  | 0.582747                   |
| 847 | NdO                       | -0.500462  | 0.500462                   |

The model used is: RandomForest...

Return the coefficient of determination of the prediction:

0.6498034287135868

R<sup>2</sup> score: 0.9438562424636918

Correlation coefficient: 0.9715226412511917

Test data - unseen during training:

R<sup>2</sup> score: 0.6498034287135868

Correlation coefficient: 0.8061038572749709

```

[7.65944244 6.0454258 7.54703935 6.52903852 7.40701747 7.62433482
 7.89376655 7.2003814 7.00684143 7.77081841 8.07389022 7.8567583
 7.63415031 7.91175742 7.62433482 5.83522001 7.14831714 6.6258132 ]
113      7.744727

```

```
35      6.149967
101     6.958607
36      6.346787
100     7.000000
13      7.966576
0       7.991400
114     7.443697
104     7.823909
96      7.677781
40      7.795880
103     7.853872
48      7.744727
39      8.221849
14      6.414314
117     5.886057
21      7.298432
9       5.971266
```

```
Name: BALB/3T3, dtype: float64
```

```
Training Root Mean Square Error: 0.2123078991104117
```

```
Testing Root Mean Square Error: 0.4427713335651045
```

```
[22]: print(target_column_name+str('_transformed'))
      print(hist1[target_column_name].hist())
```

```
BALB/3T3_transformed
```

```
AxesSubplot(0.125,0.11;0.775x0.77)
```



```
[23]: with_standardization, train_r2_, test_r2_, hist1, hist2, target_column_name,
      ↪ training_data_RMSE, test_data_RMSE = pred_model.
      ↪ prepare_data_and_create_model(molecular_descriptors_df=data,
      ↪
      ↪         correlation_threshold=0.50,
      ↪
      ↪         standardization=True,
      ↪
      ↪         model_type='RandomForestRegressor',
      ↪
      ↪         n_estimators=12,
      ↪
      ↪         target_column_name = target,
      ↪
      ↪         random_state=random_state,
      ↪
      ↪         train_test_split=True,
      ↪
      ↪         verbose=True)
```

I am doing standardization...  
molecular descriptor name



|     |                           |            |                            |
|-----|---------------------------|------------|----------------------------|
| 0   | AATSOZ                    |            |                            |
| 1   | AATSOare                  |            |                            |
| 2   | AATSOd                    |            |                            |
| 3   | AATSOdv                   |            |                            |
| 4   | AATSOi                    |            |                            |
|     | molecular descriptor name | corr_value |                            |
| 0   | AATSOZ                    | -0.020817  |                            |
| 1   | AATSOare                  | -0.148257  |                            |
| 2   | AATSOd                    | 0.022999   |                            |
| 3   | AATSOdv                   | -0.137980  |                            |
| 4   | AATSOi                    | 0.133257   |                            |
|     | molecular descriptor name | corr_value | absolute correlation value |
| 0   | AATSOZ                    | -0.020817  | 0.020817                   |
| 1   | AATSOare                  | -0.148257  | 0.148257                   |
| 2   | AATSOd                    | 0.022999   | 0.022999                   |
| 3   | AATSOdv                   | -0.137980  | 0.137980                   |
| 4   | AATSOi                    | 0.133257   | 0.133257                   |
|     | molecular descriptor name | corr_value | absolute correlation value |
| 226 | AMID_0                    | -0.546843  | 0.546843                   |
| 505 | EState_VSA5               | -0.588780  | 0.588780                   |
| 556 | GATS2c                    | 0.511671   | 0.511671                   |
| 791 | MDEO-12                   | -0.582747  | 0.582747                   |
| 847 | NdO                       | -0.500462  | 0.500462                   |
|     | molecular descriptor name | corr_value | absolute correlation value |
| 226 | AMID_0                    | -0.546843  | 0.546843                   |
| 505 | EState_VSA5               | -0.588780  | 0.588780                   |
| 556 | GATS2c                    | 0.511671   | 0.511671                   |
| 791 | MDEO-12                   | -0.582747  | 0.582747                   |
| 847 | NdO                       | -0.500462  | 0.500462                   |

The model used is: RandomForest...

Return the coefficient of determination of the prediction:  
0.6498034287135868

R<sup>2</sup> score: 0.9438562424636918

Correlation coefficient: 0.9715226412511917

Test data - unseen during training:  
R<sup>2</sup> score: 0.6498034287135868

Correlation coefficient: 0.8061038572749709

[7.65944244 6.0454258 7.54703935 6.52903852 7.40701747 7.62433482  
7.89376655 7.2003814 7.00684143 7.77081841 8.07389022 7.8567583  
7.63415031 7.91175742 7.62433482 5.83522001 7.14831714 6.6258132 ]

|     |          |
|-----|----------|
| 113 | 7.744727 |
| 35  | 6.149967 |
| 101 | 6.958607 |
| 36  | 6.346787 |
| 100 | 7.000000 |
| 13  | 7.966576 |
| 0   | 7.991400 |
| 114 | 7.443697 |

```

104    7.823909
96    7.677781
40    7.795880
103    7.853872
48    7.744727
39    8.221849
14    6.414314
117    5.886057
21    7.298432
9     5.971266

```

Name: BALB/3T3, dtype: float64

Training Root Mean Square Error: 0.2123078991104117

Testing Root Mean Square Error: 0.4427713335651045

### 3.1 Search inside correlation space

```

[24]: step = 0.01
initial_step = corr_low
last_step = corr_high
first_list = [x / 100.0 for x in range(int(initial_step*100),
    ↪int(last_step*100), int(step*100))]
n_estimators = [range(2,21,1)]
corr_th = []
second_list = []
third_list = []
fourth_l = []
fifth_l = []
f_list = []
fif_list = []
for i in first_list:

    for estimator in n_estimators[0]:

        without_standardization, train_r2, test_r2, _, h_, target_column_name,
    ↪training_data_RMSE, test_data_RMSE = pred_model.
    ↪prepare_data_and_create_model(molecular_descriptors_df=data,

    ↪                                correlation_threshold=i,

    ↪                                standardization=False,

    ↪                                model_type='RandomForestRegressor',

    ↪                                n_estimators_=estimator,

    ↪                                target_column_name = target,

```

```

        random_state=random_state,

        train_test_split_=True,

        verbose=False)
    corr_th.append(i)
    second_list.append(train_r2)
    third_list.append(test_r2)
    fourth_l.append(training_data_RMSE)
    fifth_l.append(test_data_RMSE)
    f_list.append(len(h_))
    fif_list.append(estimator)

```

```

[25]: df_without_standardization = pd.DataFrame(data=corr_th, columns=["Correlation_
    ↪threshold"])
df_without_standardization['Training data R^2 score'] = second_list
df_without_standardization['Test data R^2 score'] = third_list
df_without_standardization['Training RMSE'] = fourth_l
df_without_standardization['Test RMSE'] = fifth_l
df_without_standardization['Number of features'] = f_list
df_without_standardization['Number of estimators'] = fif_list

```

```

[26]: df_random_forest = df_without_standardization.copy()
#df_without_standardization.to_excel('../Data/
    ↪A549_Random_forest_rs_'+str(random_state)+'.xlsx')

```

```

[27]: corre_list = [x / 100.0 for x in range(int(initial_step*100),
    ↪int(last_step*100), int(0.01*100))]
for element in corre_list:
    element_ =
    ↪df_without_standardization[df_without_standardization['Correlation_
    ↪threshold'] == float(element)]
    plt.plot(element_['Number of estimators'], element_['Training data R^2_
    ↪score'], label = "Training data R^2 score", marker='v')
    plt.plot(element_['Number of estimators'], element_['Test data R^2 score'],
    ↪label = "Test data R^2 score", marker='D')
    plt.legend()
    plt.xlabel('Number of estimators -> correlation threshold: '+str(element)+'.'
    ↪\n Number of features: '+str(element_['Number of features'].iloc[0]))
    plt.xlim(max(element_['Number of estimators'])+1, min(element_['Number of_
    ↪estimators'])-1)
    plt.ylabel('R^2 score')
    plt.ylim([0, 1])
    plt.rc('grid', linestyle="-. ", color='black')
    plt.grid(True)

```

```
plt.show()
```

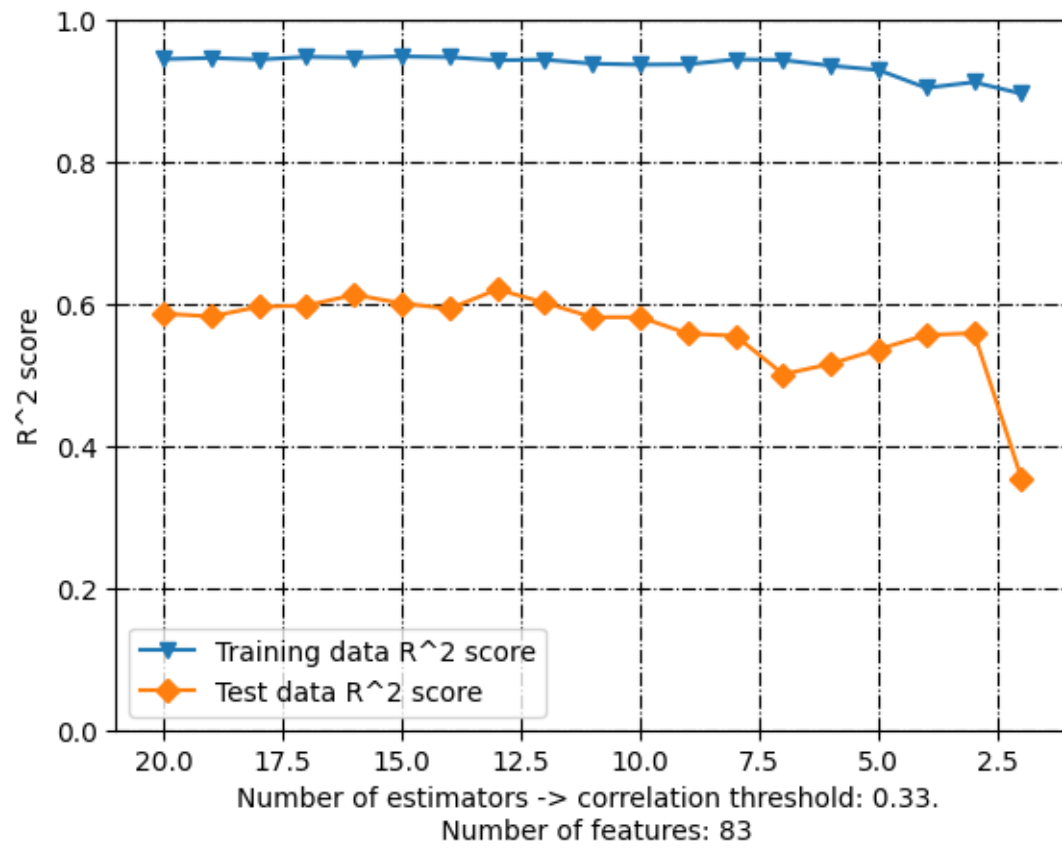

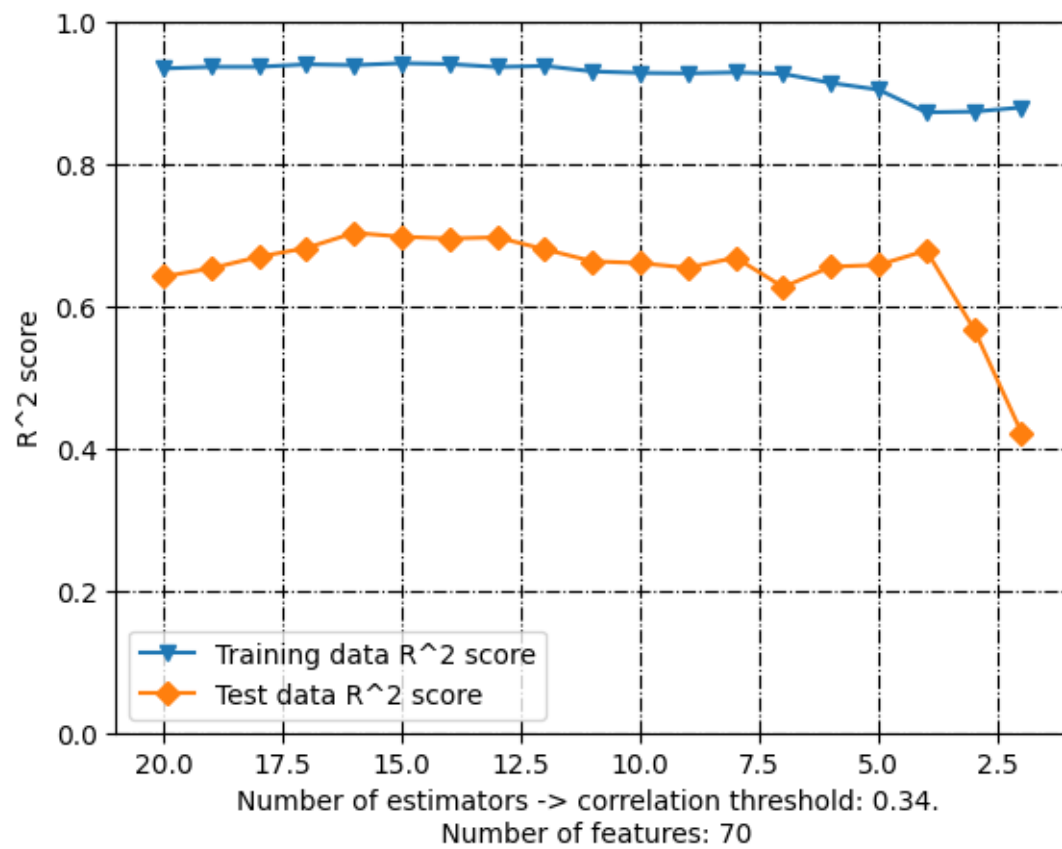

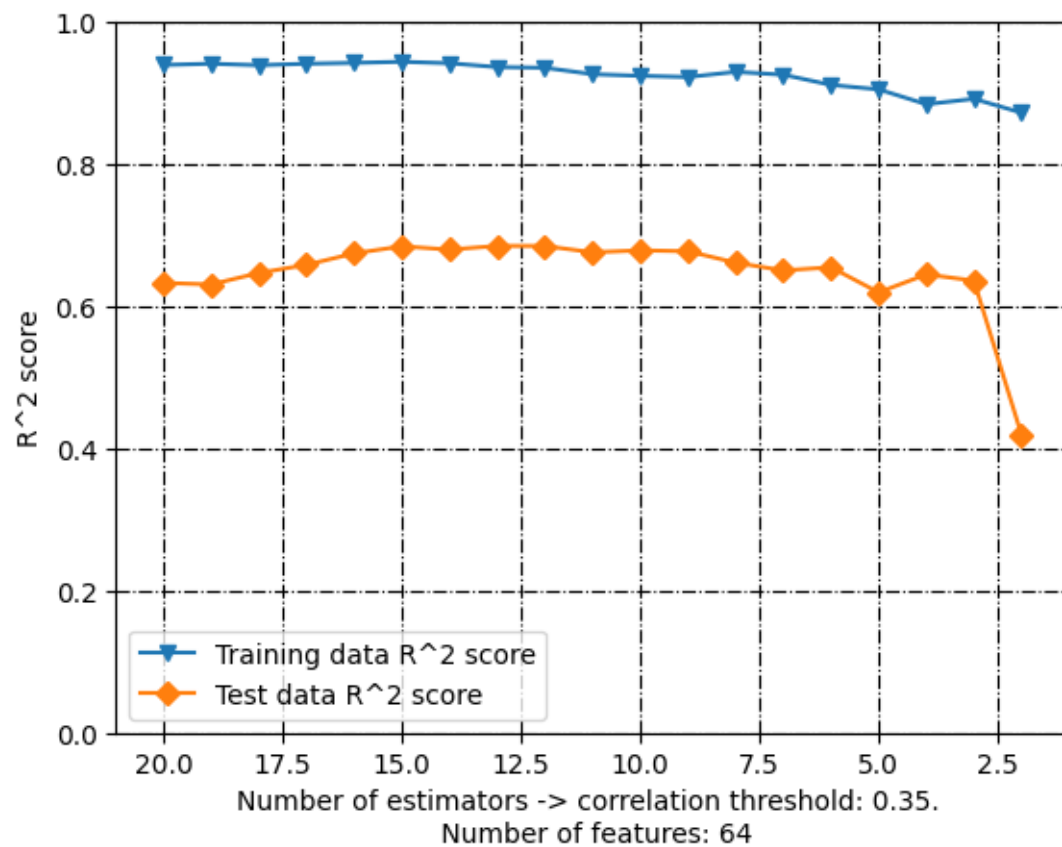

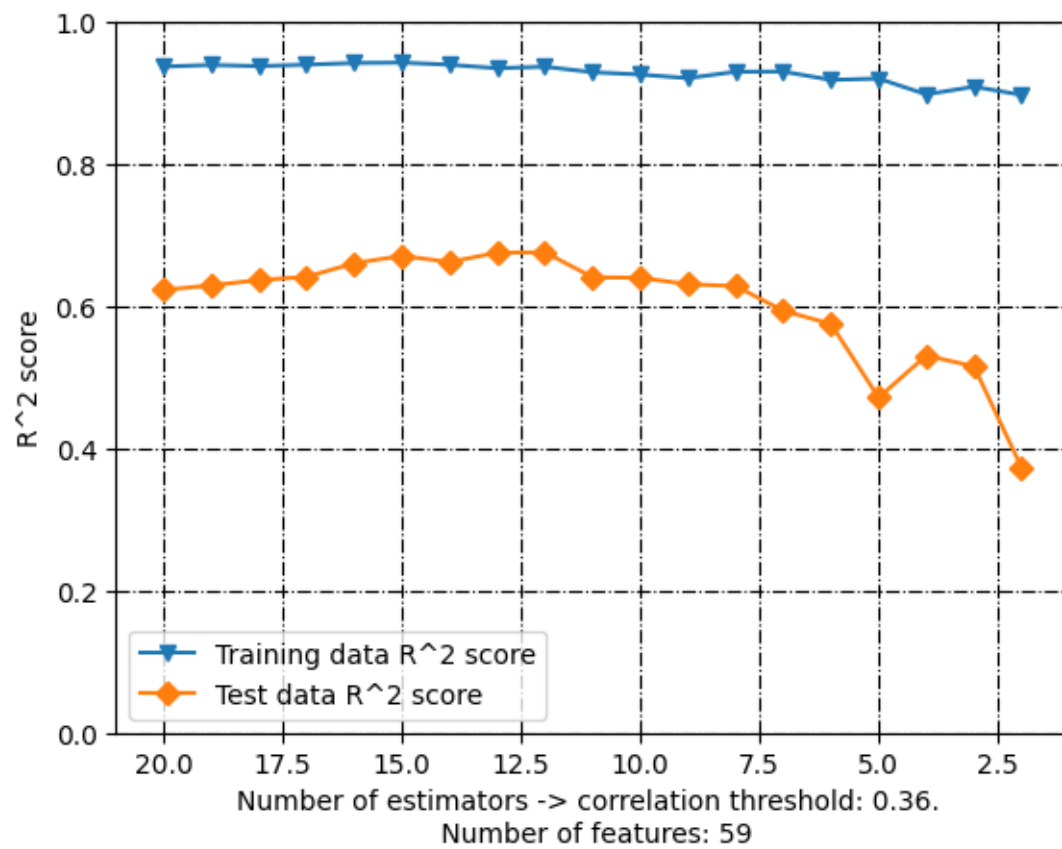

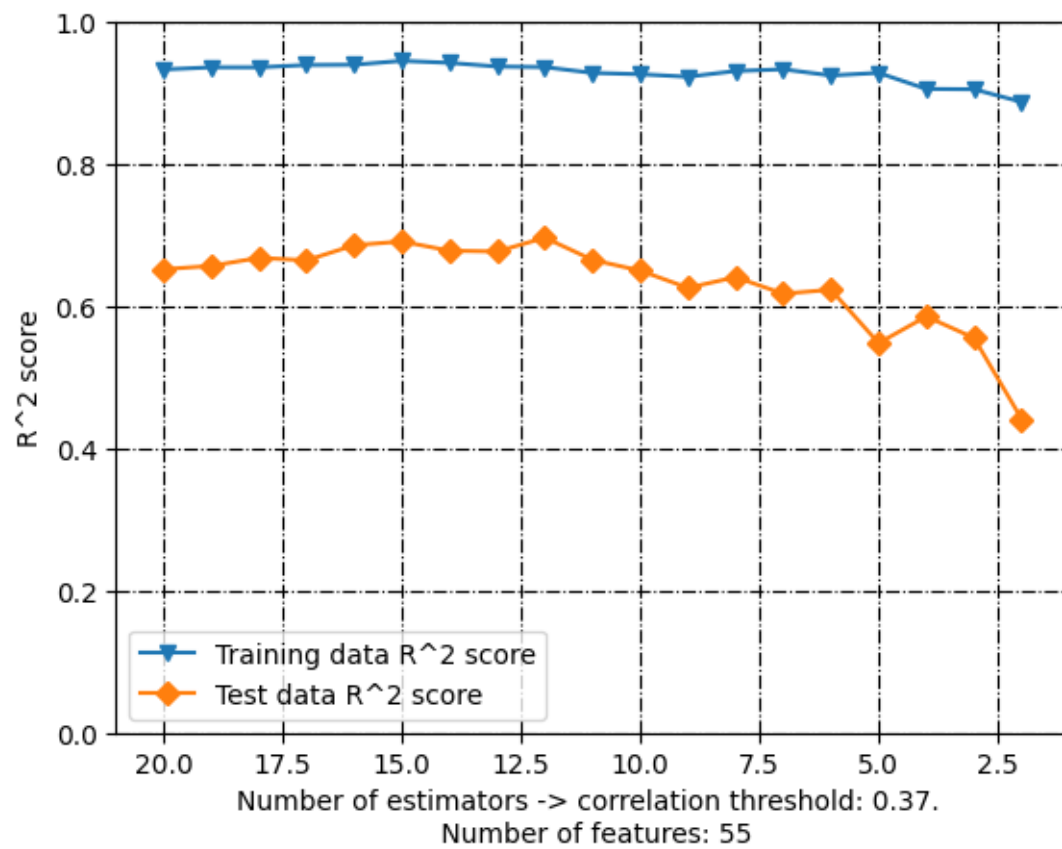



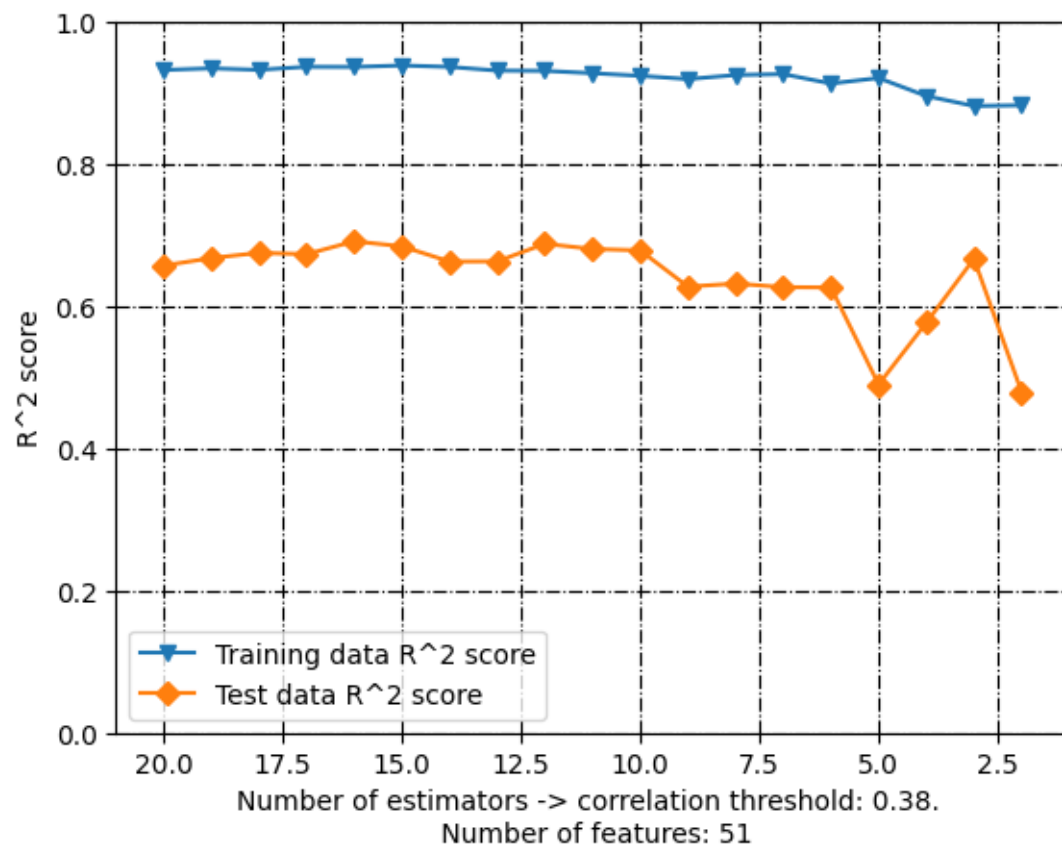

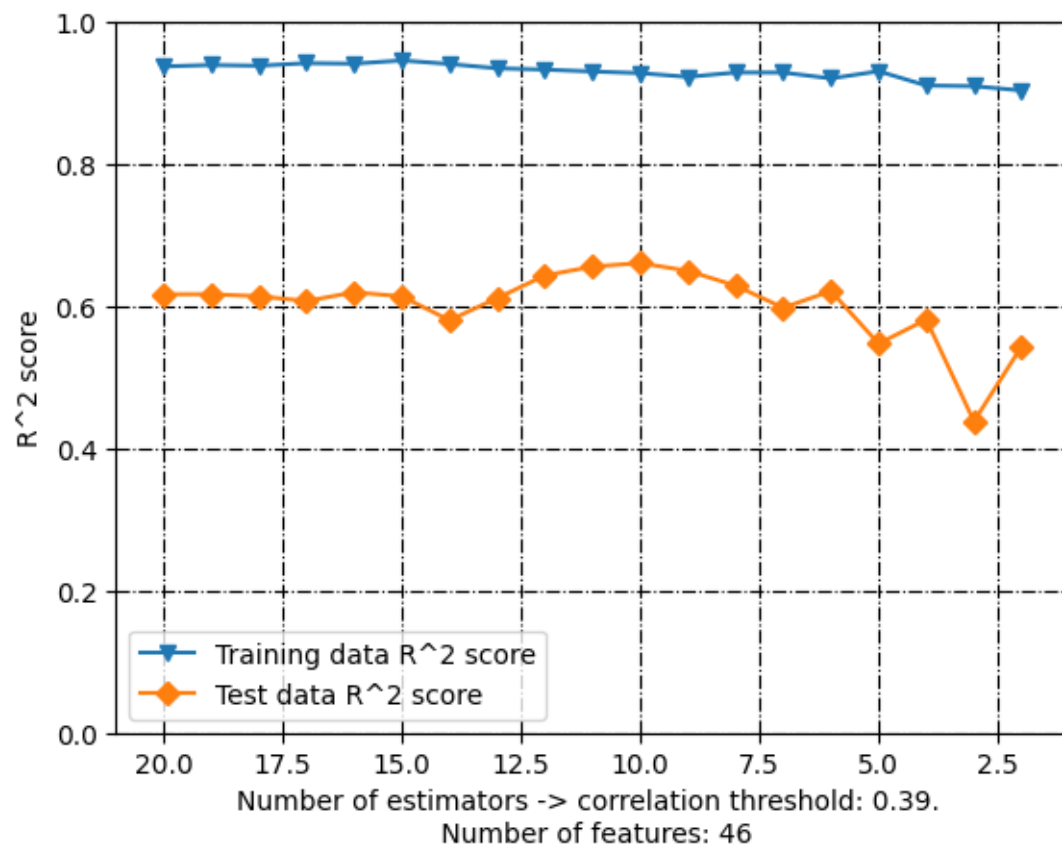

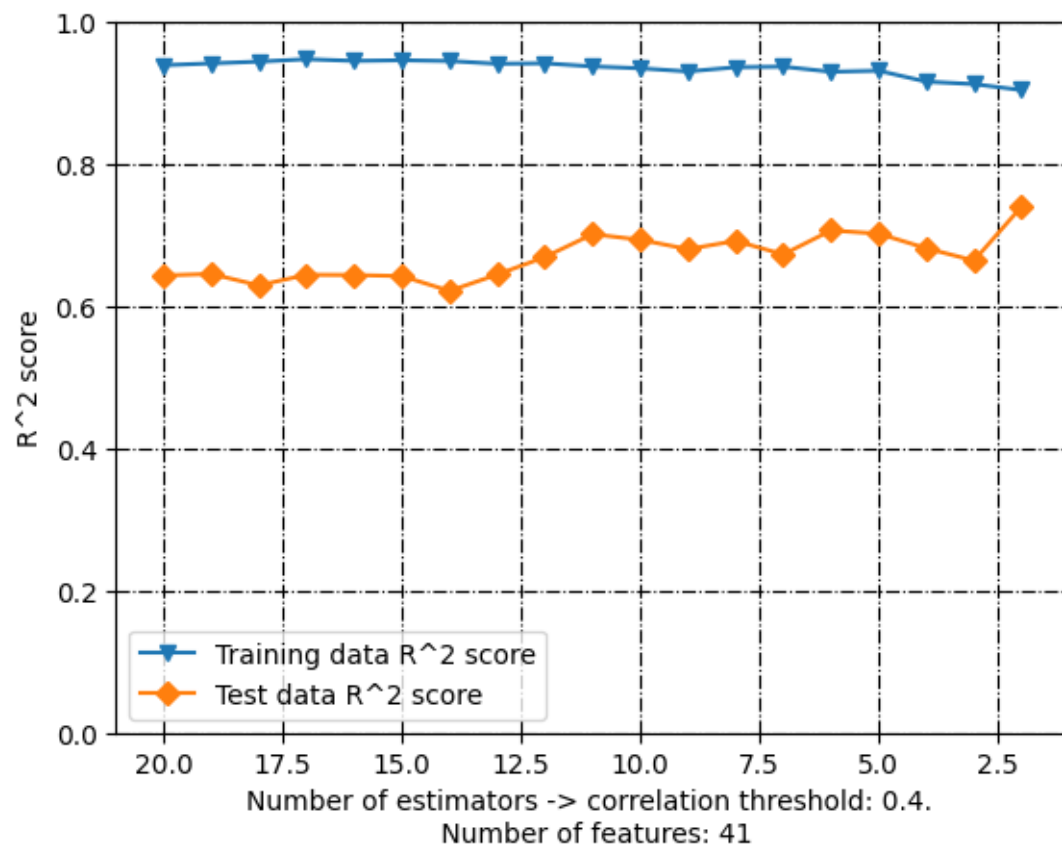

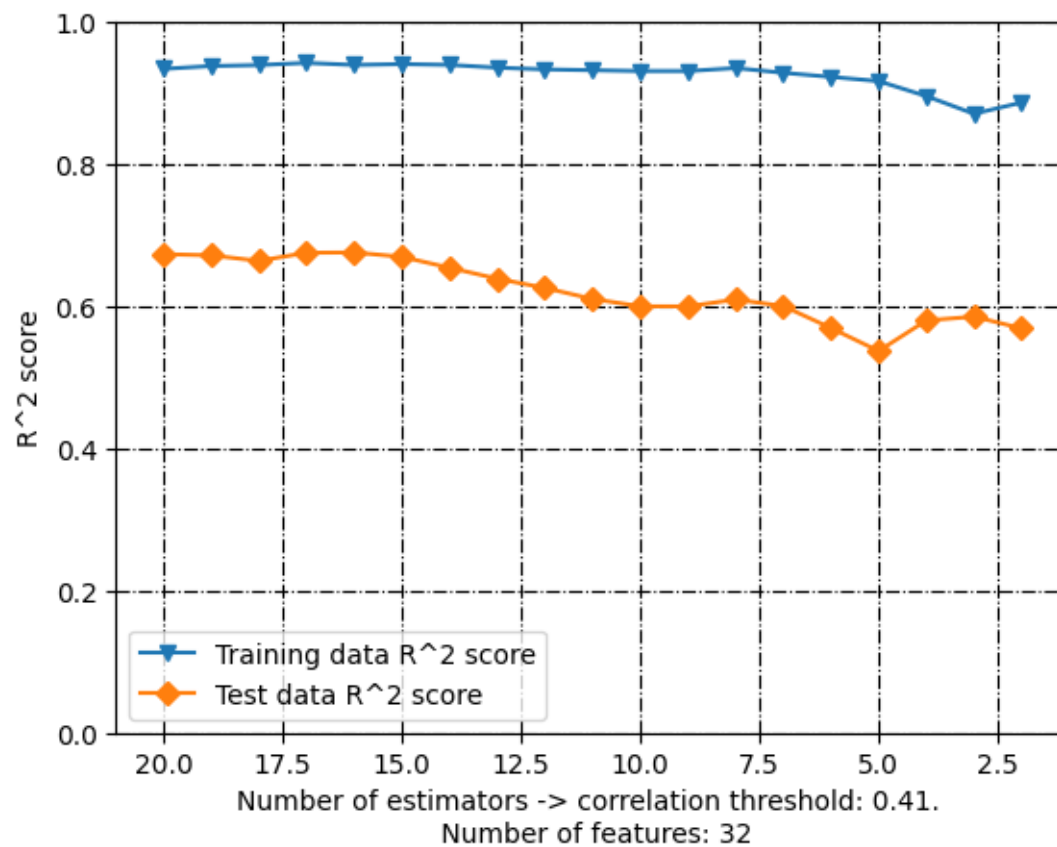

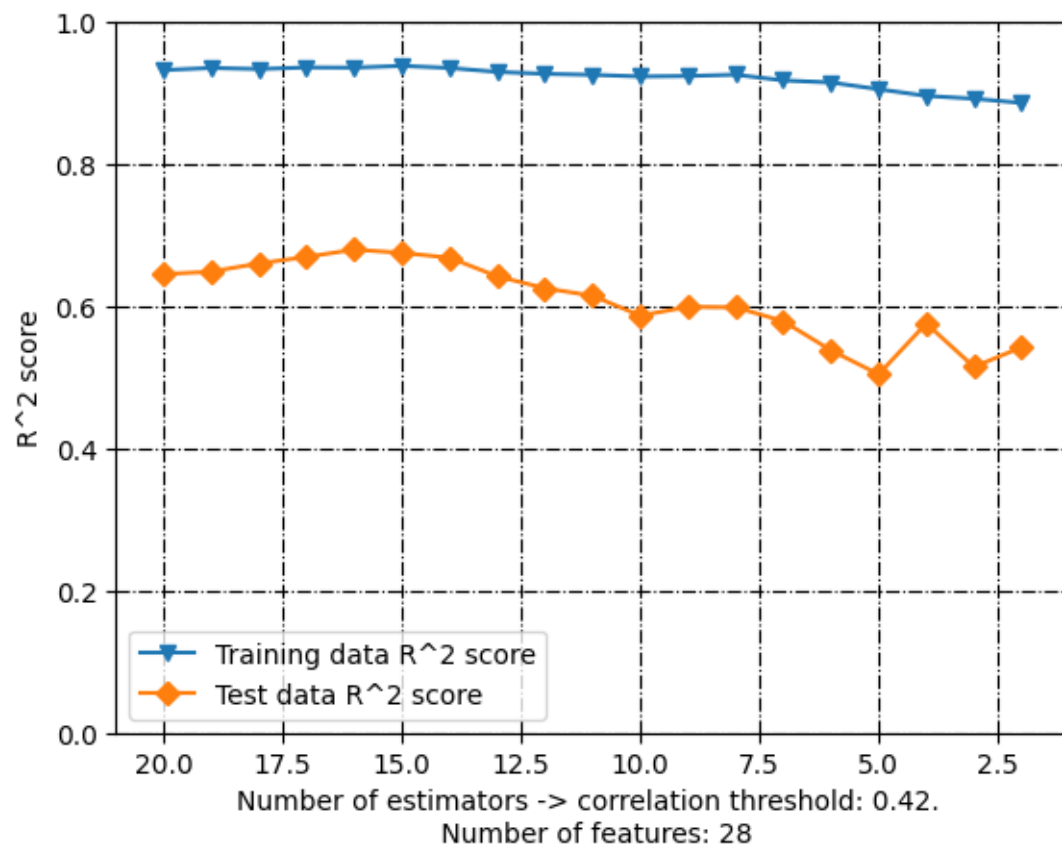

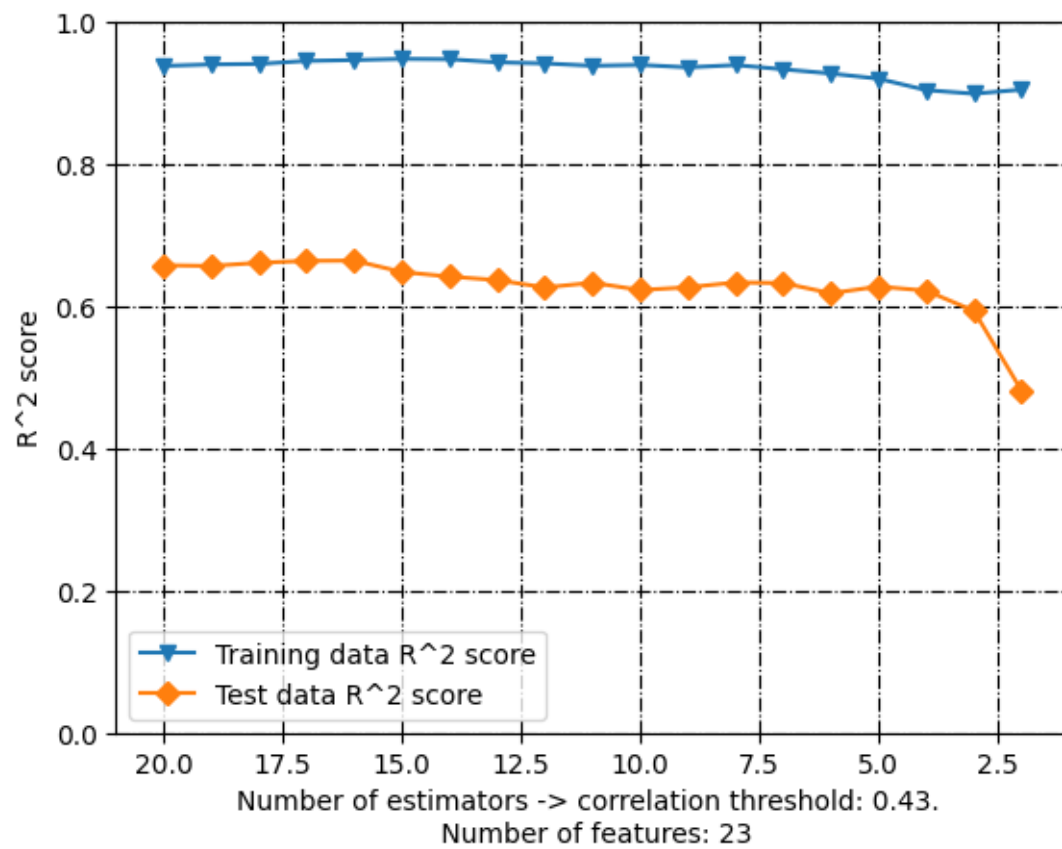

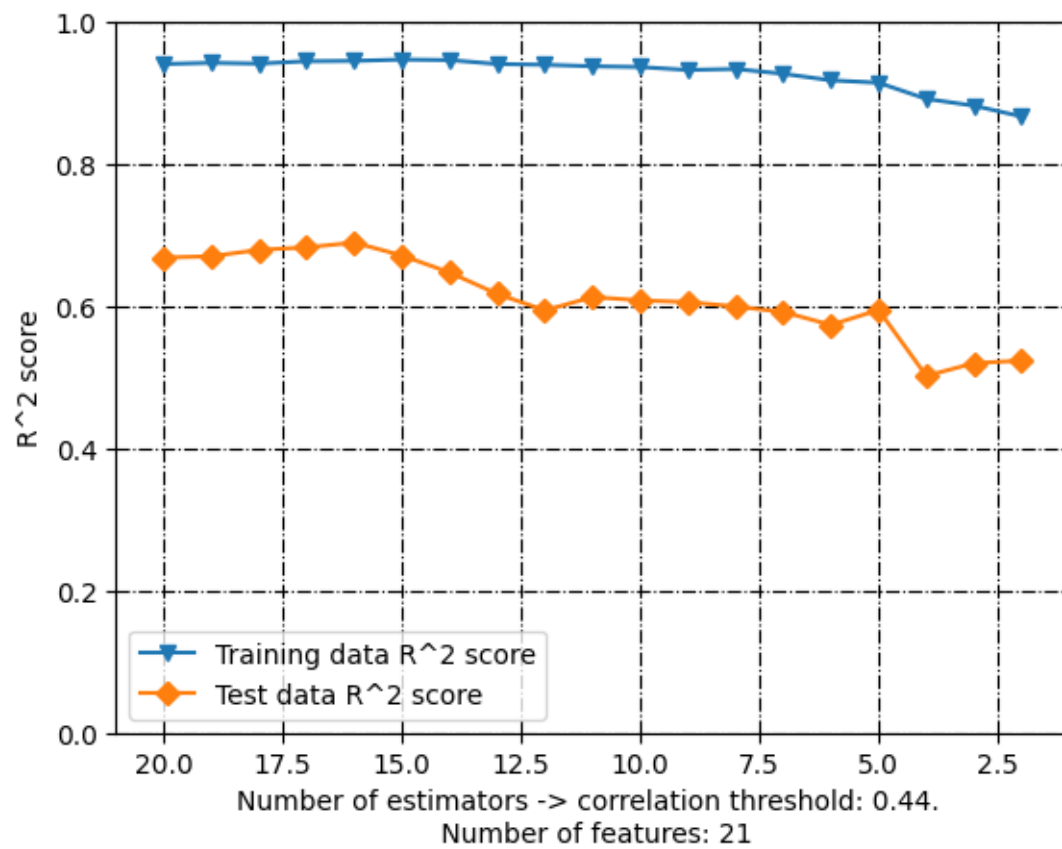

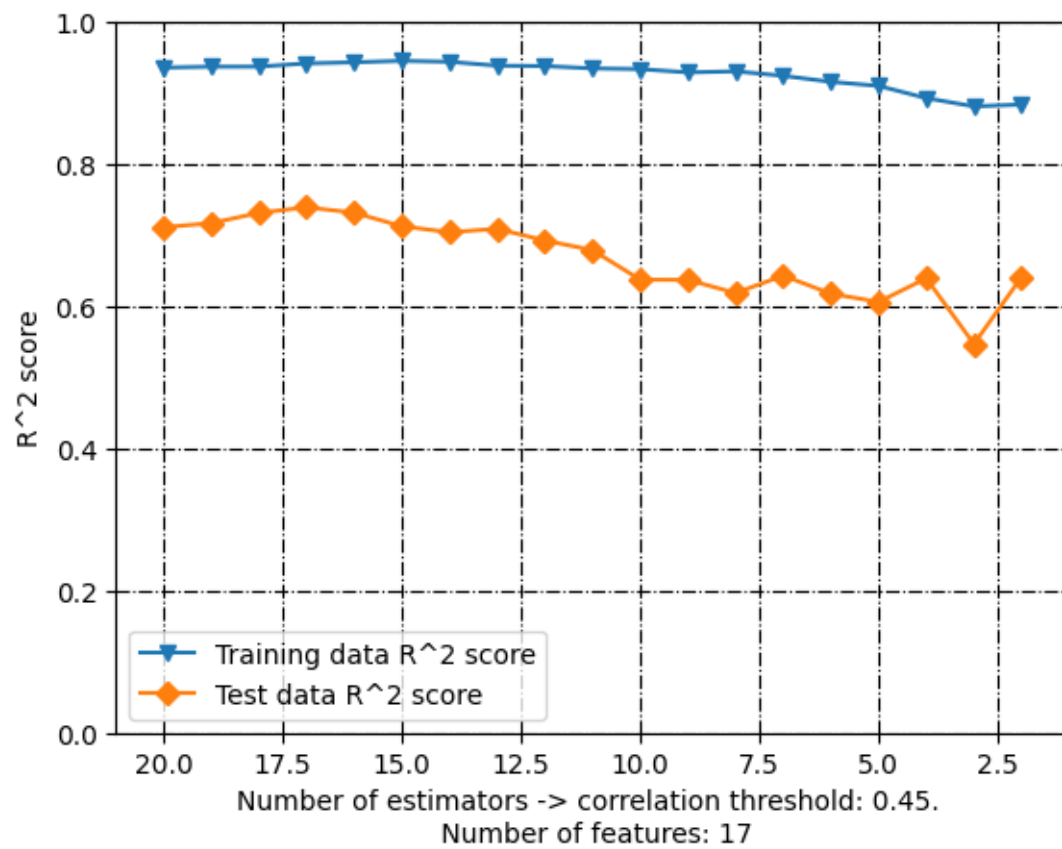



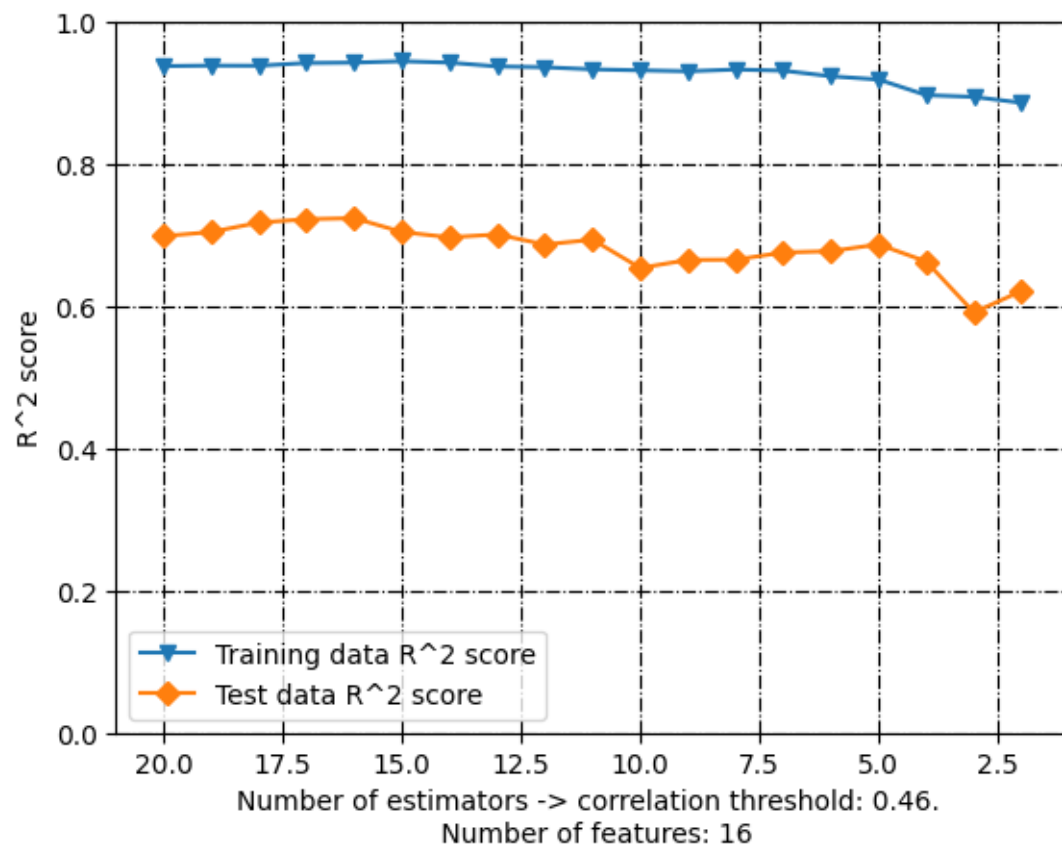

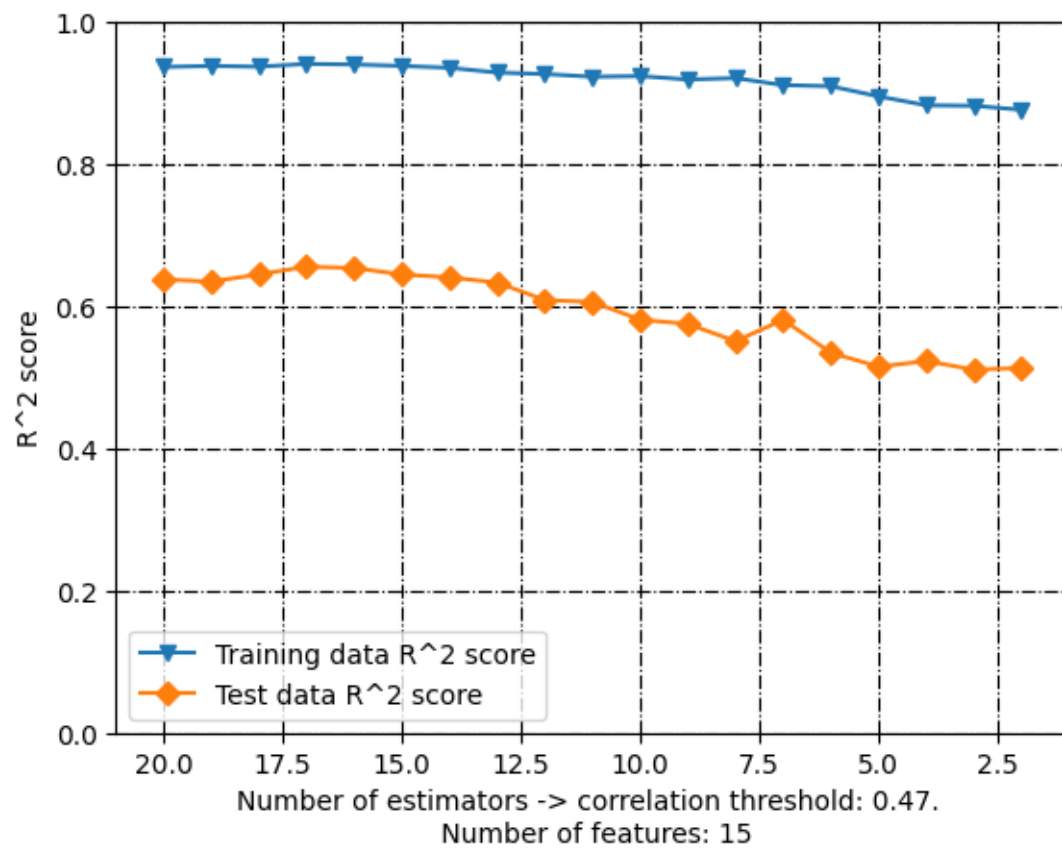

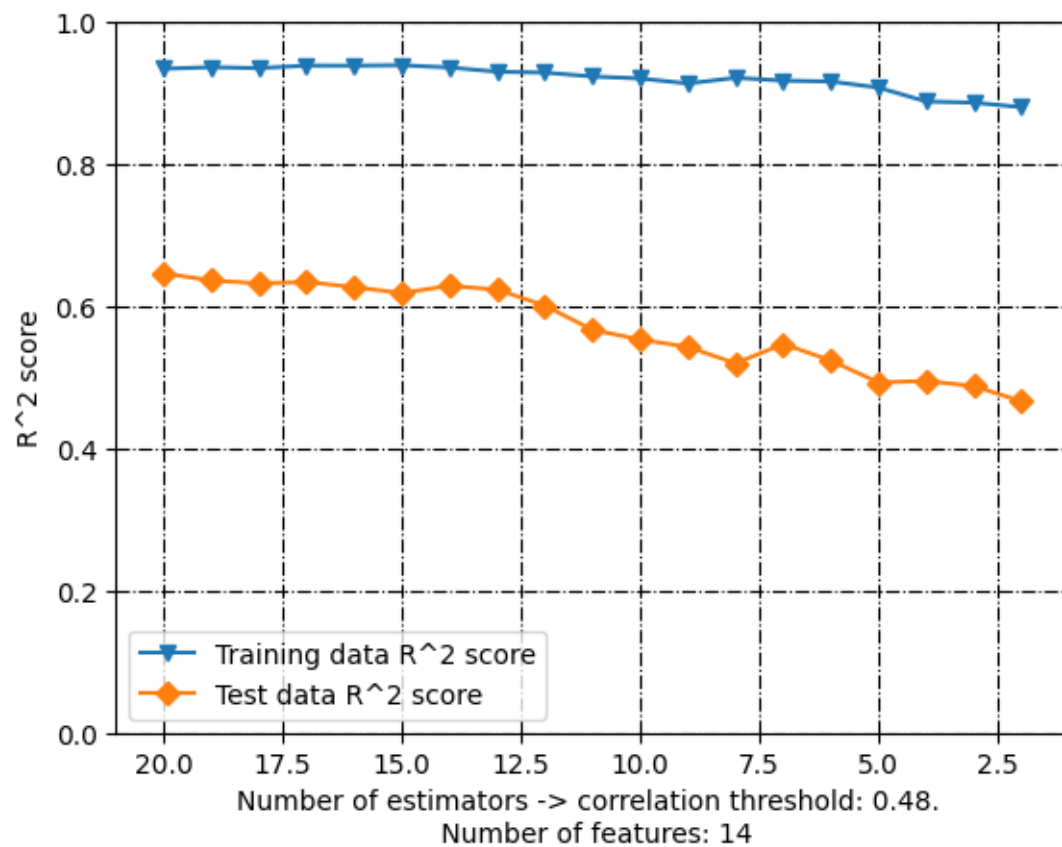

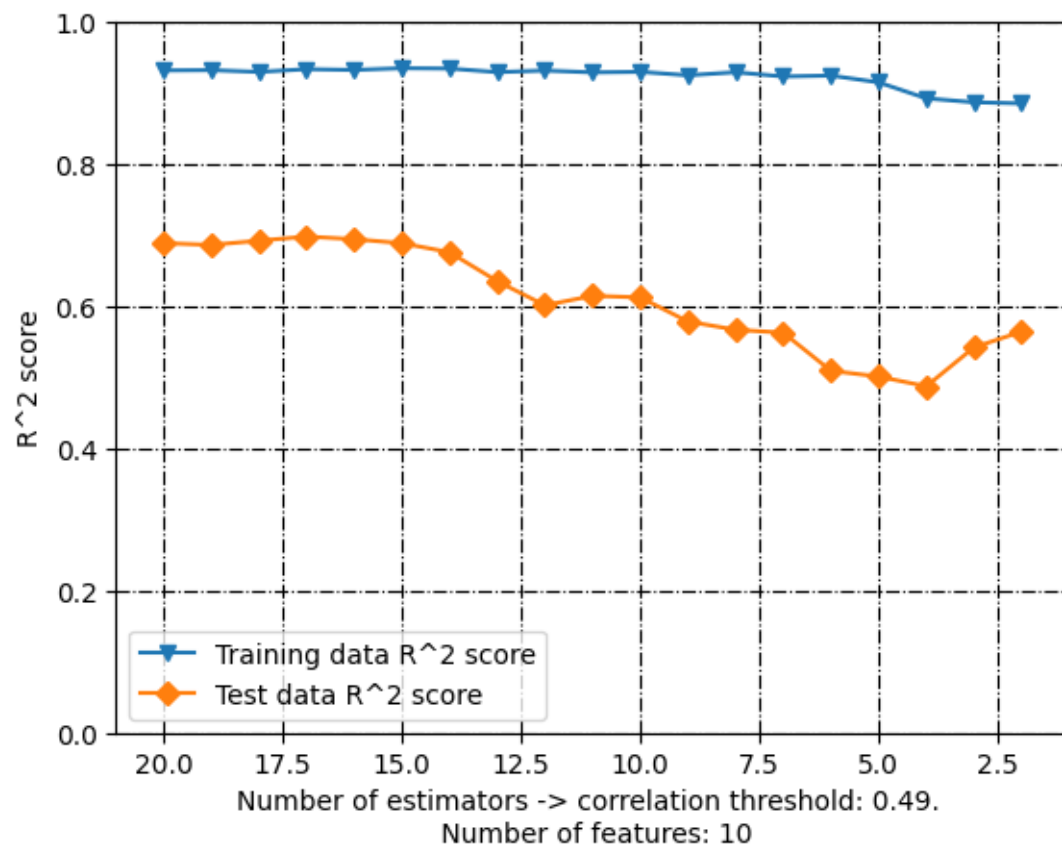

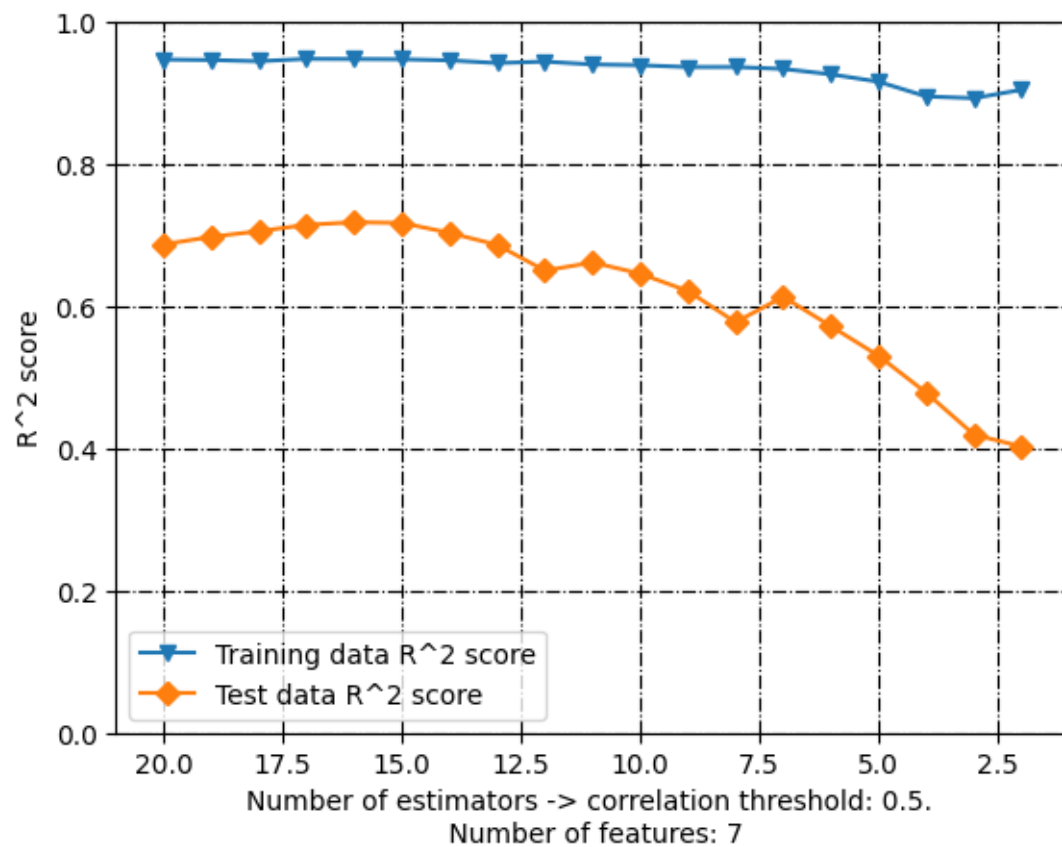

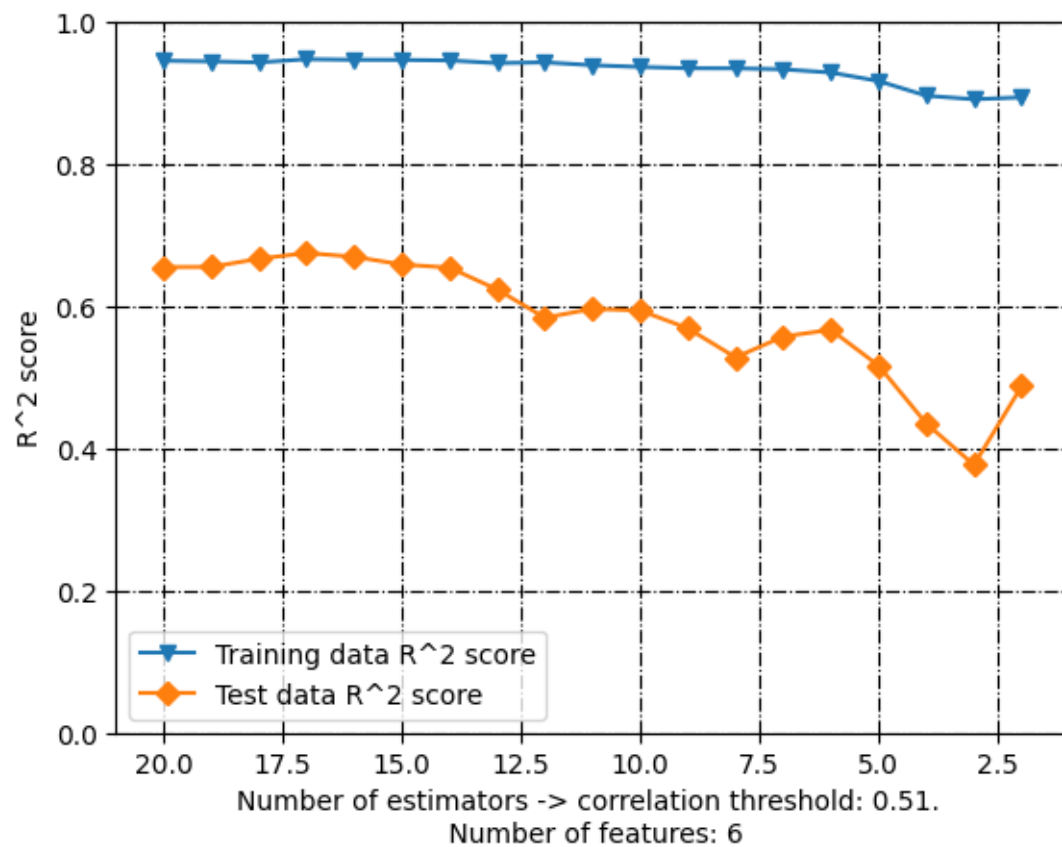

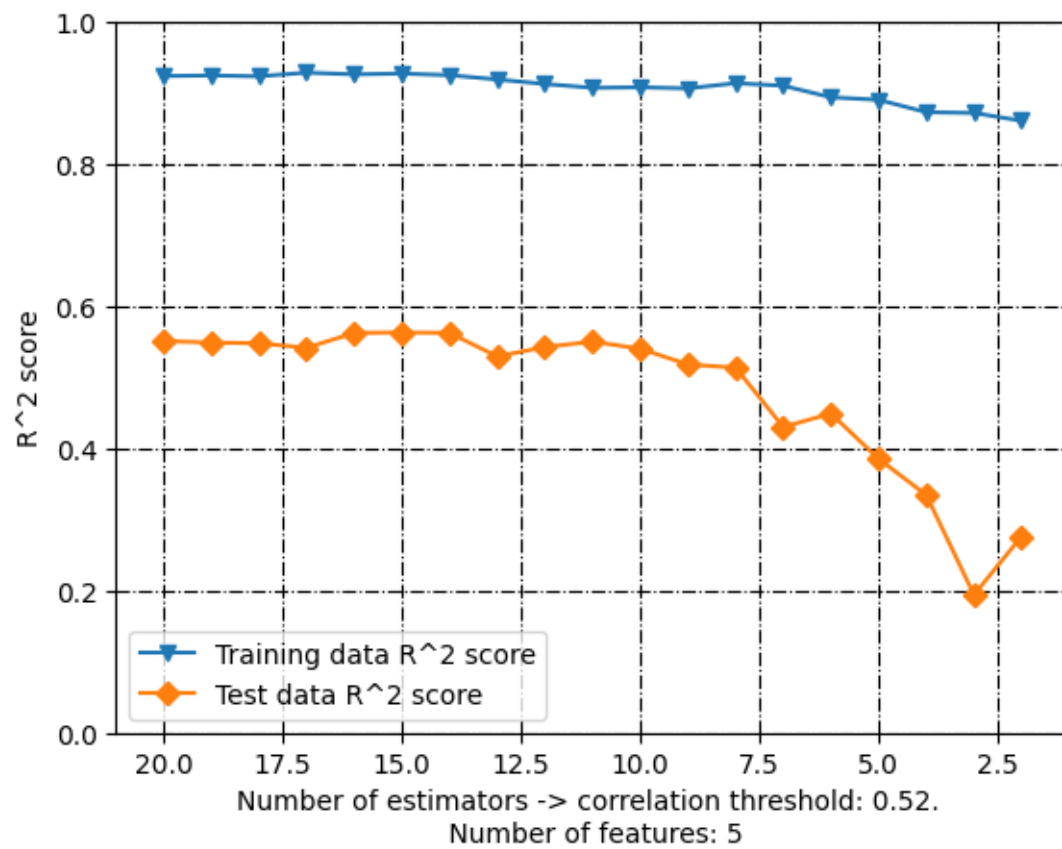

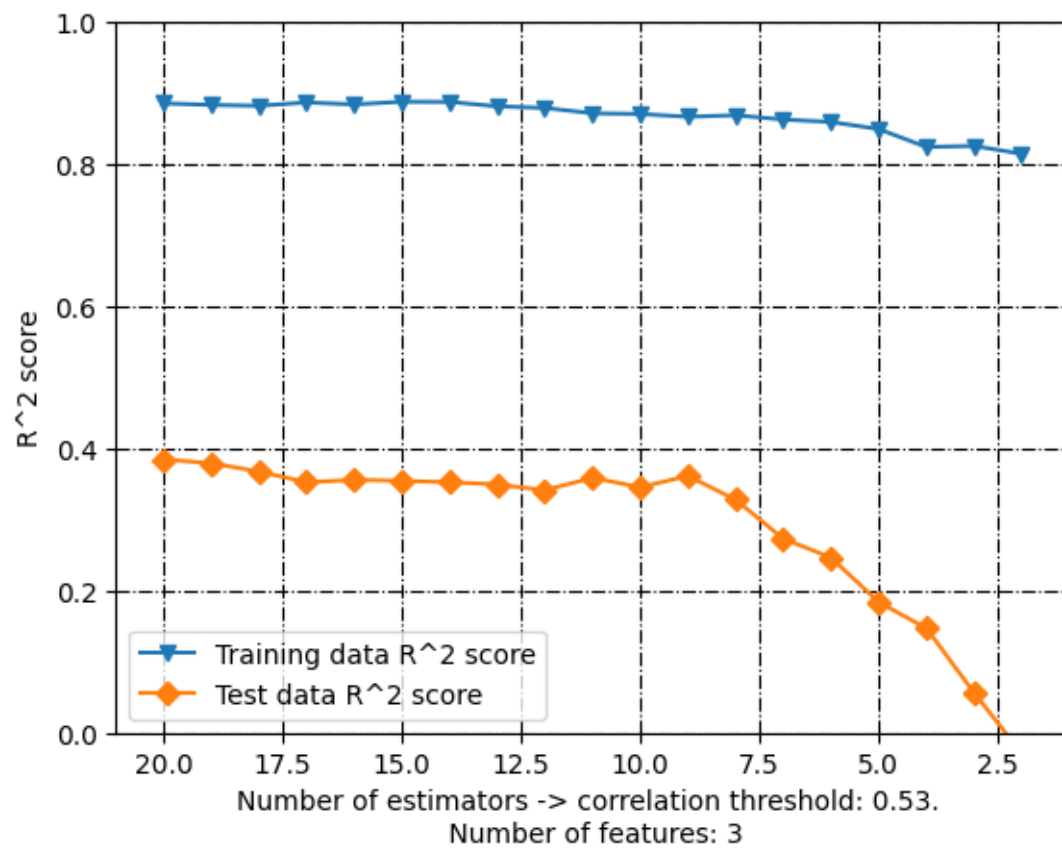



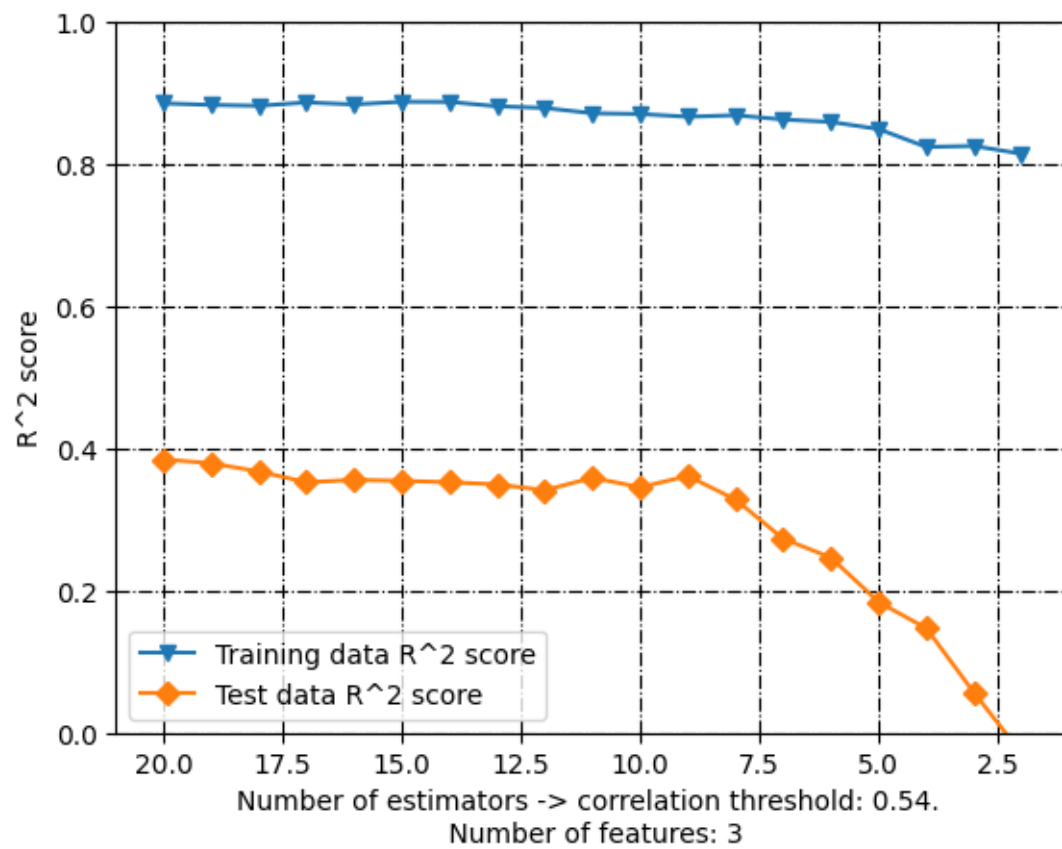

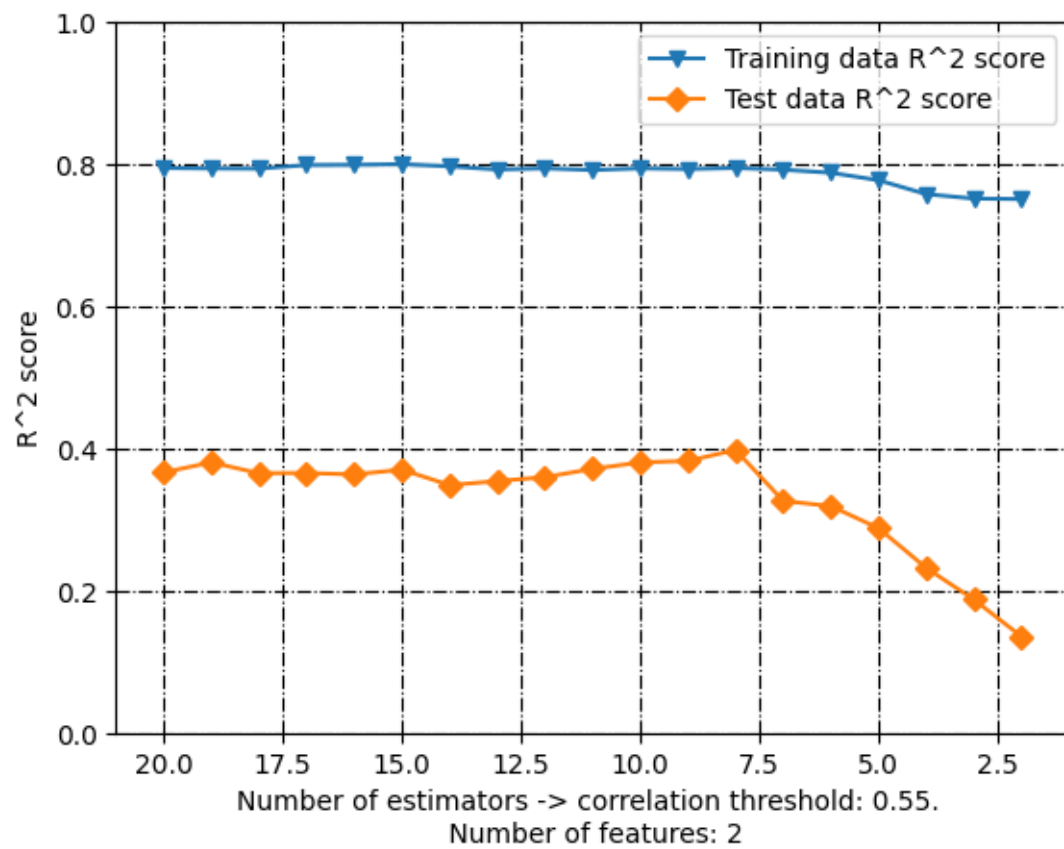

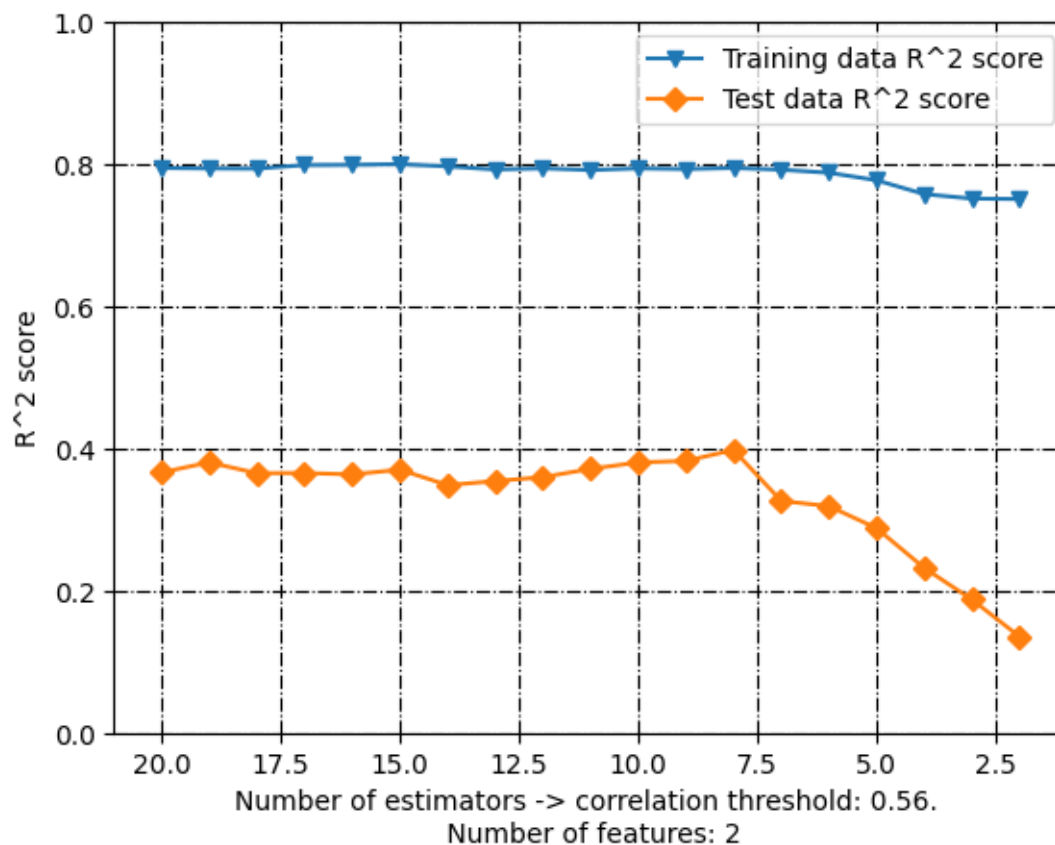

```
[28]: plt.plot(df_without_standardization['Correlation threshold'],  
             df_without_standardization['Number of features'], label = "Number of  
             features", marker='.')  
plt.legend()  
plt.xlabel('Correlation threshold')  
plt.ylabel('Number of features')  
plt.show()
```



[ ]:

## 4 KNeighborsRegressor

```
[29]: without_standardization, train_r2_, test_r2_, hist1, hist2, target_column_name,
      ↪ training_data_RMSE, test_data_RMSE = pred_model.
      ↪ prepare_data_and_create_model(molecular_descriptors_df=data,
      ↪
      ↪         correlation_threshold=0.50,
      ↪
      ↪         standardization=False,
      ↪
      ↪         model_type='KNeighborsRegressor',
      ↪
      ↪         target_column_name = target,
      ↪
      ↪         random_state=random_state,
      ↪
      ↪         train_test_split_=True,
```



verbose=True)



I am not doing standardization...

```
molecular descriptor name
0          AATSOZ
1          AATSOare
2          AATSOd
3          AATSOdv
4          AATSOi
molecular descriptor name  corr_value
0          AATSOZ          -0.020817
1          AATSOare        -0.148257
2          AATSOd           0.022999
3          AATSOdv         -0.137980
4          AATSOi           0.133257
molecular descriptor name  corr_value  absolute correlation value
0          AATSOZ          -0.020817          0.020817
1          AATSOare        -0.148257          0.148257
2          AATSOd           0.022999          0.022999
3          AATSOdv         -0.137980          0.137980
4          AATSOi           0.133257          0.133257
molecular descriptor name  corr_value  absolute correlation value
226          AMID_O        -0.546843          0.546843
505          EState_VSA5    -0.588780          0.588780
556          GATS2c         0.511671          0.511671
791          MDEO-12        -0.582747          0.582747
847          NdO            -0.500462          0.500462
molecular descriptor name  corr_value  absolute correlation value
226          AMID_O        -0.546843          0.546843
505          EState_VSA5    -0.588780          0.588780
556          GATS2c         0.511671          0.511671
791          MDEO-12        -0.582747          0.582747
847          NdO            -0.500462          0.500462
The model used is: KNeighbors...
Return the coefficient of determination of the prediction:
0.03596548905623609
R^2 score: 0.6394578454563543
Correlation coefficient: 0.7996610816191784
Test data - unseen during training:
R^2 score: 0.03596548905623609
Correlation coefficient: 0.18964569348191404
[7.74174218 5.4727385 7.98152154 5.4727385 7.49153572 7.49965533
 7.55994122 7.72931259 5.91107765 7.49153572 7.63092522 7.62109922
 7.63993908 7.92082567 7.49965533 6.9757706 7.55994122 6.60967766]
113      7.744727
35       6.149967
101      6.958607
```

```

36      6.346787
100     7.000000
13      7.966576
0       7.991400
114     7.443697
104     7.823909
96      7.677781
40      7.795880
103     7.853872
48      7.744727
39      8.221849
14      6.414314
117     5.886057
21      7.298432
9       5.971266
Name: BALB/3T3, dtype: float64
Training Root Mean Square Error: 0.5380138304158049
Testing Root Mean Square Error: 0.7346319988851434

```

```

[30]: print(target_column_name+str('_transformed'))
      print(hist1[target_column_name].hist())

```

```

BALB/3T3_transformed
AxesSubplot(0.125,0.11;0.775x0.77)

```



```
[31]: with_standardization, train_r2_, test_r2_, hist1, hist2, target_column_name,
      ↪ training_data_RMSE, test_data_RMSE = pred_model.
      ↪ prepare_data_and_create_model(molecular_descriptors_df=data,
      ↪
      ↪         correlation_threshold=0.50,
      ↪
      ↪         standardization=True,
      ↪
      ↪         model_type='KNeighborsRegressor',
      ↪
      ↪         target_column_name = target,
      ↪
      ↪         random_state=random_state,
      ↪
      ↪         train_test_split_=True,
      ↪
      ↪         verbose=True)
```

I am doing standardization...

|   | molecular descriptor name | corr_value | absolute correlation value |
|---|---------------------------|------------|----------------------------|
| 0 | AATS0Z                    | -0.020817  | 0.020817                   |
| 1 | AATS0are                  | -0.148257  | 0.148257                   |
| 2 | AATS0d                    | 0.022999   | 0.022999                   |
| 3 | AATS0dv                   | -0.137980  | 0.137980                   |
| 4 | AATS0i                    | 0.133257   | 0.133257                   |

  

|   | molecular descriptor name | corr_value | absolute correlation value |
|---|---------------------------|------------|----------------------------|
| 0 | AATS0Z                    | -0.020817  | 0.020817                   |
| 1 | AATS0are                  | -0.148257  | 0.148257                   |
| 2 | AATS0d                    | 0.022999   | 0.022999                   |
| 3 | AATS0dv                   | -0.137980  | 0.137980                   |
| 4 | AATS0i                    | 0.133257   | 0.133257                   |

  

|     | molecular descriptor name | corr_value | absolute correlation value |
|-----|---------------------------|------------|----------------------------|
| 226 | AMID_0                    | -0.546843  | 0.546843                   |
| 505 | EState_VSA5               | -0.588780  | 0.588780                   |
| 556 | GATS2c                    | 0.511671   | 0.511671                   |
| 791 | MDE0-12                   | -0.582747  | 0.582747                   |
| 847 | NdO                       | -0.500462  | 0.500462                   |

  

|     | molecular descriptor name | corr_value | absolute correlation value |
|-----|---------------------------|------------|----------------------------|
| 226 | AMID_0                    | -0.546843  | 0.546843                   |
| 505 | EState_VSA5               | -0.588780  | 0.588780                   |

|     |         |           |          |
|-----|---------|-----------|----------|
| 556 | GATS2c  | 0.511671  | 0.511671 |
| 791 | MDE0-12 | -0.582747 | 0.582747 |
| 847 | NdO     | -0.500462 | 0.500462 |

The model used is: KNeighbors...

Return the coefficient of determination of the prediction:

0.03596548905623609

R<sup>2</sup> score: 0.6394578454563543

Correlation coefficient: 0.7996610816191784

Test data - unseen during training:

R<sup>2</sup> score: 0.03596548905623609

Correlation coefficient: 0.18964569348191404

[7.74174218 5.4727385 7.98152154 5.4727385 7.49153572 7.49965533  
7.55994122 7.72931259 5.91107765 7.49153572 7.63092522 7.62109922  
7.63993908 7.92082567 7.49965533 6.9757706 7.55994122 6.60967766]

113 7.744727  
35 6.149967  
101 6.958607  
36 6.346787  
100 7.000000  
13 7.966576  
0 7.991400  
114 7.443697  
104 7.823909  
96 7.677781  
40 7.795880  
103 7.853872  
48 7.744727  
39 8.221849  
14 6.414314  
117 5.886057  
21 7.298432  
9 5.971266

Name: BALB/3T3, dtype: float64

Training Root Mean Square Error: 0.5380138304158049

Testing Root Mean Square Error: 0.7346319988851434

#### 4.1 Search inside correlation space

```
[32]: step = 0.01
initial_step = corr_low
last_step = corr_high
first_list = [x / 100.0 for x in range(int(initial_step*100),
    ↪int(last_step*100), int(step*100))]
second_list = []
third_list = []
fourth_l = []
fifth_l = []
```



```

f_list = []
for i in first_list:
    without_standardization, train_r2, test_r2, _, h_, target_column_name, \
    training_data_RMSE, test_data_RMSE = pred_model.
    prepare_data_and_create_model(molecular_descriptors_df = data,

    correlation_threshold = i,

    standardization = False,

    model_type = 'KNeighborsRegressor',

    target_column_name = target,

    random_state=random_state,

    train_test_split_ = True,

    verbose = False)
    second_list.append(train_r2)
    third_list.append(test_r2)
    fourth_l.append(training_data_RMSE)
    fifth_l.append(test_data_RMSE)
    f_list.append(len(h_))

```

File "C:\Users\aleks\anaconda3\envs\cheminf\_gpu\lib\site-packages\joblib\externals\loky\backend\context.py", line 217, in \_count\_physical\_cores  
 raise ValueError(

```

[33]: df_without_standardization = pd.DataFrame(data=first_list, \
    columns=["Correlation threshold"])
df_without_standardization['Training data R^2 score'] = second_list
df_without_standardization['Test data R^2 score'] = third_list
df_without_standardization['Training RMSE'] = fourth_l
df_without_standardization['Test RMSE'] = fifth_l
df_without_standardization['Number of features'] = f_list

```

```

[34]: df_k_nearest = df_without_standardization.copy()
df_without_standardization

```

```

[34]: Correlation threshold  Training data R^2 score  Test data R^2 score  \
0          0.33          0.629651          -0.036742
1          0.34          0.639095           0.139245
2          0.35          0.639095           0.139245
3          0.36          0.639095           0.139245
4          0.37          0.639095           0.139245

```

|    |      |          |           |
|----|------|----------|-----------|
| 5  | 0.38 | 0.639095 | 0.139245  |
| 6  | 0.39 | 0.637122 | 0.238102  |
| 7  | 0.40 | 0.637122 | 0.238102  |
| 8  | 0.41 | 0.599270 | 0.114948  |
| 9  | 0.42 | 0.611799 | 0.176188  |
| 10 | 0.43 | 0.609663 | 0.076650  |
| 11 | 0.44 | 0.596976 | -0.067617 |
| 12 | 0.45 | 0.603513 | 0.125988  |
| 13 | 0.46 | 0.601925 | 0.113482  |
| 14 | 0.47 | 0.605971 | 0.125852  |
| 15 | 0.48 | 0.610819 | 0.138037  |
| 16 | 0.49 | 0.614048 | 0.115808  |
| 17 | 0.50 | 0.639458 | 0.035965  |
| 18 | 0.51 | 0.633981 | -0.015910 |
| 19 | 0.52 | 0.623860 | -0.030642 |
| 20 | 0.53 | 0.589531 | 0.046000  |
| 21 | 0.54 | 0.589531 | 0.046000  |
| 22 | 0.55 | 0.557005 | -0.019234 |
| 23 | 0.56 | 0.557005 | -0.019234 |

|    | Training RMSE | Test RMSE | Number of features |
|----|---------------|-----------|--------------------|
| 0  | 0.545282      | 0.761831  | 83                 |
| 1  | 0.538284      | 0.694166  | 70                 |
| 2  | 0.538284      | 0.694166  | 64                 |
| 3  | 0.538284      | 0.694166  | 59                 |
| 4  | 0.538284      | 0.694166  | 55                 |
| 5  | 0.538284      | 0.694166  | 51                 |
| 6  | 0.539754      | 0.653088  | 46                 |
| 7  | 0.539754      | 0.653088  | 41                 |
| 8  | 0.567207      | 0.703895  | 32                 |
| 9  | 0.558269      | 0.679106  | 28                 |
| 10 | 0.559803      | 0.718963  | 23                 |
| 11 | 0.568828      | 0.773092  | 21                 |
| 12 | 0.564196      | 0.699491  | 17                 |
| 13 | 0.565325      | 0.704478  | 16                 |
| 14 | 0.562444      | 0.699546  | 15                 |
| 15 | 0.558973      | 0.694653  | 14                 |
| 16 | 0.556650      | 0.703553  | 10                 |
| 17 | 0.538014      | 0.734632  | 7                  |
| 18 | 0.542085      | 0.754139  | 6                  |
| 19 | 0.549529      | 0.759587  | 5                  |
| 20 | 0.574058      | 0.730799  | 3                  |
| 21 | 0.574058      | 0.730799  | 3                  |
| 22 | 0.596369      | 0.755371  | 2                  |
| 23 | 0.596369      | 0.755371  | 2                  |

## 4.2 Plots

```
[35]: plt.plot(df_without_standardization['Correlation threshold'],  
             df_without_standardization['Training data R^2 score'], label = "Training_  
             data R^2 score", marker='v')  
plt.plot(df_without_standardization['Correlation threshold'],  
         df_without_standardization['Test data R^2 score'], label = "Test data R^2_  
         score", marker='D')  
plt.legend()  
plt.xlabel('Correlation threshold')  
plt.ylabel('R^2 score')  
plt.ylim([0, 1])  
plt.show()
```

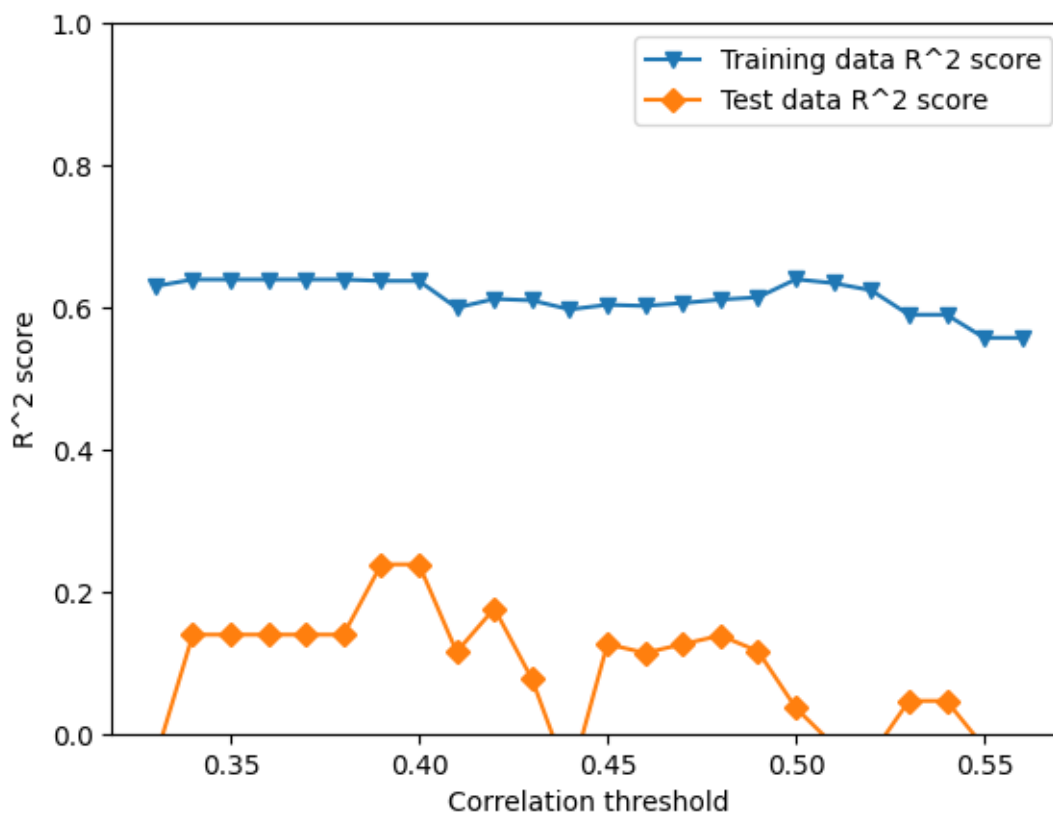

```
[36]: plt.plot(df_without_standardization['Correlation threshold'],  
             df_without_standardization['Number of features'], label = "Number of_  
             features", marker='.')  
plt.legend()  
plt.xlabel('Correlation threshold')  
plt.ylabel('Number of features')  
plt.show()
```



[ ]:

## 5 Support Vector Machines (SVM)

```
[37]: without_standardization, train_r2_, test_r2_, hist1, hist2, target_column_name,
      ↪ training_data_RMSE, test_data_RMSE = pred_model.
      ↪ prepare_data_and_create_model(molecular_descriptors_df=data,
      ↪
      ↪         correlation_threshold=0.50,
      ↪
      ↪         standardization=False,
      ↪
      ↪         model_type='SVR',
      ↪
      ↪         kernel_ = 'linear',
      ↪
      ↪         gamma_ = 'auto',
      ↪
      ↪         target_column_name = target,
```

```

    random_state=random_state,

    train_test_split_=True,

    verbose=True)

```

I am not doing standardization...

|   | molecular descriptor name |  |
|---|---------------------------|--|
| 0 | AATSOZ                    |  |
| 1 | AATSOare                  |  |
| 2 | AATSOd                    |  |
| 3 | AATSOdv                   |  |
| 4 | AATSOi                    |  |

  

|   | molecular descriptor name | corr_value |
|---|---------------------------|------------|
| 0 | AATSOZ                    | -0.020817  |
| 1 | AATSOare                  | -0.148257  |
| 2 | AATSOd                    | 0.022999   |
| 3 | AATSOdv                   | -0.137980  |
| 4 | AATSOi                    | 0.133257   |

  

|   | molecular descriptor name | corr_value | absolute correlation value |
|---|---------------------------|------------|----------------------------|
| 0 | AATSOZ                    | -0.020817  | 0.020817                   |
| 1 | AATSOare                  | -0.148257  | 0.148257                   |
| 2 | AATSOd                    | 0.022999   | 0.022999                   |
| 3 | AATSOdv                   | -0.137980  | 0.137980                   |
| 4 | AATSOi                    | 0.133257   | 0.133257                   |

  

|     | molecular descriptor name | corr_value | absolute correlation value |
|-----|---------------------------|------------|----------------------------|
| 226 | AMID_0                    | -0.546843  | 0.546843                   |
| 505 | EState_VSA5               | -0.588780  | 0.588780                   |
| 556 | GATS2c                    | 0.511671   | 0.511671                   |
| 791 | MDEO-12                   | -0.582747  | 0.582747                   |
| 847 | NdO                       | -0.500462  | 0.500462                   |

  

|     | molecular descriptor name | corr_value | absolute correlation value |
|-----|---------------------------|------------|----------------------------|
| 226 | AMID_0                    | -0.546843  | 0.546843                   |
| 505 | EState_VSA5               | -0.588780  | 0.588780                   |
| 556 | GATS2c                    | 0.511671   | 0.511671                   |
| 791 | MDEO-12                   | -0.582747  | 0.582747                   |
| 847 | NdO                       | -0.500462  | 0.500462                   |

The model used is: SVR...

Return the coefficient of determination of the prediction:

0.39713091168792347

R<sup>2</sup> score: 0.5120253005133564

Correlation coefficient: 0.7155594318526983

Test data - unseen during training:

R<sup>2</sup> score: 0.39713091168792347

Correlation coefficient: 0.630183236597042

[7.74774499 6.20132237 7.60965581 6.23184126 7.67800449 7.57637124

```

7.79915899 7.72375861 6.70620896 7.65980561 8.02951732 7.65802784
7.96384165 7.48307941 7.57147053 6.93264546 7.80689881 6.49916559]
113      7.744727
35       6.149967
101      6.958607
36       6.346787
100      7.000000
13       7.966576
0        7.991400
114      7.443697
104      7.823909
96       7.677781
40       7.795880
103      7.853872
48       7.744727
39       8.221849
14       6.414314
117      5.886057
21       7.298432
9        5.971266

```

Name: BALB/3T3, dtype: float64

Training Root Mean Square Error: 0.6259131383252285

Testing Root Mean Square Error: 0.5809450542874729

```

[38]: print(target_column_name+str('_transformed'))
      print(hist1[target_column_name].hist())

```

BALB/3T3\_transformed

AxesSubplot(0.125,0.11;0.775x0.77)



```
[39]: with_standardization, train_r2_, test_r2_, hist1, hist2, target_column_name,
      ↪ training_data_RMSE, test_data_RMSE = pred_model.
      ↪ prepare_data_and_create_model(molecular_descriptors_df=data,
      ↪
      ↪         correlation_threshold=0.50,
      ↪
      ↪         standardization=True,
      ↪
      ↪         model_type='SVR',
      ↪
      ↪         kernel_ = 'linear',
      ↪
      ↪         gamma_ = 'auto',
      ↪
      ↪         target_column_name = target,
      ↪
      ↪         random_state=random_state,
      ↪
      ↪         train_test_split_=True,
      ↪
      ↪         verbose=True)
```

I am doing standardization...

molecular descriptor name

|   |          |
|---|----------|
| 0 | AATSOZ   |
| 1 | AATSOare |
| 2 | AATSOd   |
| 3 | AATSOdv  |
| 4 | AATSOi   |

|   | molecular descriptor name | corr_value |
|---|---------------------------|------------|
| 0 | AATSOZ                    | -0.020817  |
| 1 | AATSOare                  | -0.148257  |
| 2 | AATSOd                    | 0.022999   |
| 3 | AATSOdv                   | -0.137980  |
| 4 | AATSOi                    | 0.133257   |

|   | molecular descriptor name | corr_value | absolute correlation value |
|---|---------------------------|------------|----------------------------|
| 0 | AATSOZ                    | -0.020817  | 0.020817                   |
| 1 | AATSOare                  | -0.148257  | 0.148257                   |
| 2 | AATSOd                    | 0.022999   | 0.022999                   |
| 3 | AATSOdv                   | -0.137980  | 0.137980                   |
| 4 | AATSOi                    | 0.133257   | 0.133257                   |

|     | molecular descriptor name | corr_value | absolute correlation value |
|-----|---------------------------|------------|----------------------------|
| 226 | AMID_O                    | -0.546843  | 0.546843                   |
| 505 | EState_VSA5               | -0.588780  | 0.588780                   |
| 556 | GATS2c                    | 0.511671   | 0.511671                   |
| 791 | MDEO-12                   | -0.582747  | 0.582747                   |
| 847 | NdO                       | -0.500462  | 0.500462                   |

|     | molecular descriptor name | corr_value | absolute correlation value |
|-----|---------------------------|------------|----------------------------|
| 226 | AMID_O                    | -0.546843  | 0.546843                   |
| 505 | EState_VSA5               | -0.588780  | 0.588780                   |
| 556 | GATS2c                    | 0.511671   | 0.511671                   |
| 791 | MDEO-12                   | -0.582747  | 0.582747                   |
| 847 | NdO                       | -0.500462  | 0.500462                   |

The model used is: SVR...

Return the coefficient of determination of the prediction:

0.39713091168792347

R<sup>2</sup> score: 0.5120253005133564

Correlation coefficient: 0.7155594318526983

Test data - unseen during training:

R<sup>2</sup> score: 0.39713091168792347

Correlation coefficient: 0.630183236597042

[7.74774499 6.20132237 7.60965581 6.23184126 7.67800449 7.57637124  
7.79915899 7.72375861 6.70620896 7.65980561 8.02951732 7.65802784  
7.96384165 7.48307941 7.57147053 6.93264546 7.80689881 6.49916559]

|     |          |
|-----|----------|
| 113 | 7.744727 |
| 35  | 6.149967 |
| 101 | 6.958607 |
| 36  | 6.346787 |
| 100 | 7.000000 |
| 13  | 7.966576 |



```

0      7.991400
114    7.443697
104    7.823909
96     7.677781
40     7.795880
103    7.853872
48     7.744727
39     8.221849
14     6.414314
117    5.886057
21     7.298432
9      5.971266

```

Name: BALB/3T3, dtype: float64

Training Root Mean Square Error: 0.6259131383252285

Testing Root Mean Square Error: 0.5809450542874729

## 5.1 Search inside correlation space

```

[40]: step = 0.01
      initial_step = corr_low
      last_step = corr_high
      first_list = [x / 100.0 for x in range(int(initial_step*100),
      ↪int(last_step*100), int(step*100))]
      second_list = []
      third_list = []
      fourth_l = []
      fifth_l = []
      f_list = []
      for i in first_list:
          without_standardization, train_r2, test_r2, _, h_, target_column_name,
          ↪training_data_RMSE, test_data_RMSE = pred_model.
          ↪prepare_data_and_create_model(molecular_descriptors_df = data,

          ↪
          ↪correlation_threshold = i,
          ↪
          ↪standardization = False,
          ↪
          ↪model_type = 'SVR',
          ↪
          ↪kernel_ = 'linear',
          ↪
          ↪gamma_ = 'auto',
          ↪
          ↪target_column_name = target,
          ↪
          ↪random_state=random_state,

```

```

    ↪          train_test_split_ = True,

    ↪          verbose = False)
second_list.append(train_r2)
third_list.append(test_r2)
fourth_l.append(training_data_RMSE)
fifth_l.append(test_data_RMSE)
f_list.append(len(h_))

```

```

[41]: df_without_standardization = pd.DataFrame(data=first_list,
    ↪columns=["Correlation threshold"])
df_without_standardization['Training data R^2 score'] = second_list
df_without_standardization['Test data R^2 score'] = third_list
df_without_standardization['Training RMSE'] = fourth_l
df_without_standardization['Test RMSE'] = fifth_l
df_without_standardization['Number of features'] = f_list

```

```

[42]: df_svm = df_without_standardization.copy()
df_without_standardization

```

```

[42]:
Correlation threshold  Training data R^2 score  Test data R^2 score  \
0                    0.33                0.833508          -0.317838
1                    0.34                0.767207           0.054930
2                    0.35                0.764112          -0.029497
3                    0.36                0.758894           0.017978
4                    0.37                0.752743           0.036937
5                    0.38                0.739794          -0.065670
6                    0.39                0.729804          -0.104285
7                    0.40                0.722749          -0.164598
8                    0.41                0.662256           0.407917
9                    0.42                0.641200           0.380035
10                   0.43                0.639518           0.383536
11                   0.44                0.617187           0.319788
12                   0.45                0.596438           0.355671
13                   0.46                0.596571           0.356252
14                   0.47                0.590345           0.396293
15                   0.48                0.587436           0.249061
16                   0.49                0.567418           0.301040
17                   0.50                0.512025           0.397131
18                   0.51                0.509541           0.387642
19                   0.52                0.508352           0.383807
20                   0.53                0.473627           0.495218
21                   0.54                0.473627           0.495218
22                   0.55                0.474450           0.499681
23                   0.56                0.474450           0.499681

```

|    | Training RMSE | Test RMSE | Number of features |
|----|---------------|-----------|--------------------|
| 0  | 0.365605      | 0.858924  | 83                 |
| 1  | 0.432315      | 0.727370  | 70                 |
| 2  | 0.435180      | 0.759165  | 64                 |
| 3  | 0.439966      | 0.741454  | 59                 |
| 4  | 0.445543      | 0.734262  | 55                 |
| 5  | 0.457061      | 0.772387  | 51                 |
| 6  | 0.465752      | 0.786256  | 46                 |
| 7  | 0.471794      | 0.807443  | 41                 |
| 8  | 0.520726      | 0.575725  | 32                 |
| 9  | 0.536712      | 0.589124  | 28                 |
| 10 | 0.537969      | 0.587459  | 23                 |
| 11 | 0.554381      | 0.617086  | 21                 |
| 12 | 0.569208      | 0.600589  | 17                 |
| 13 | 0.569114      | 0.600318  | 16                 |
| 14 | 0.573488      | 0.581348  | 15                 |
| 15 | 0.575521      | 0.648374  | 14                 |
| 16 | 0.589318      | 0.625532  | 10                 |
| 17 | 0.625913      | 0.580945  | 7                  |
| 18 | 0.627505      | 0.585499  | 6                  |
| 19 | 0.628265      | 0.587330  | 5                  |
| 20 | 0.650073      | 0.531588  | 3                  |
| 21 | 0.650073      | 0.531588  | 3                  |
| 22 | 0.649565      | 0.529233  | 2                  |
| 23 | 0.649565      | 0.529233  | 2                  |

## 5.2 Plots

```
[43]: plt.plot(df_without_standardization['Correlation threshold'],
             df_without_standardization['Training data R^2 score'], label = "Training
             data R^2 score", marker='v')
plt.plot(df_without_standardization['Correlation threshold'],
             df_without_standardization['Test data R^2 score'], label = "Test data R^2
             score", marker='D')
plt.legend()
plt.xlabel('Correlation threshold')
plt.ylabel('R^2 score')
plt.ylim([0, 1])
plt.show()
```

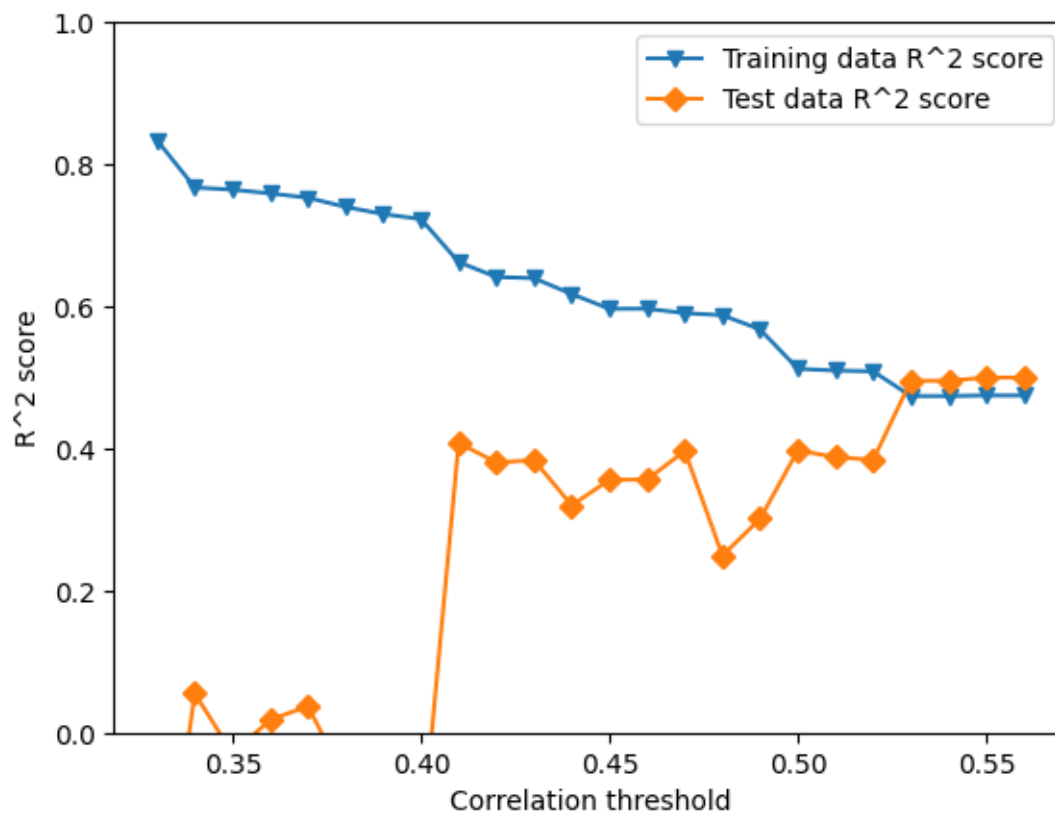

```
[44]: plt.plot(df_without_standardization['Correlation threshold'],  
            df_without_standardization['Number of features'], label = "Number of  
            features", marker='.')  
plt.legend()  
plt.xlabel('Correlation threshold')  
plt.ylabel('Number of features')  
plt.show()
```

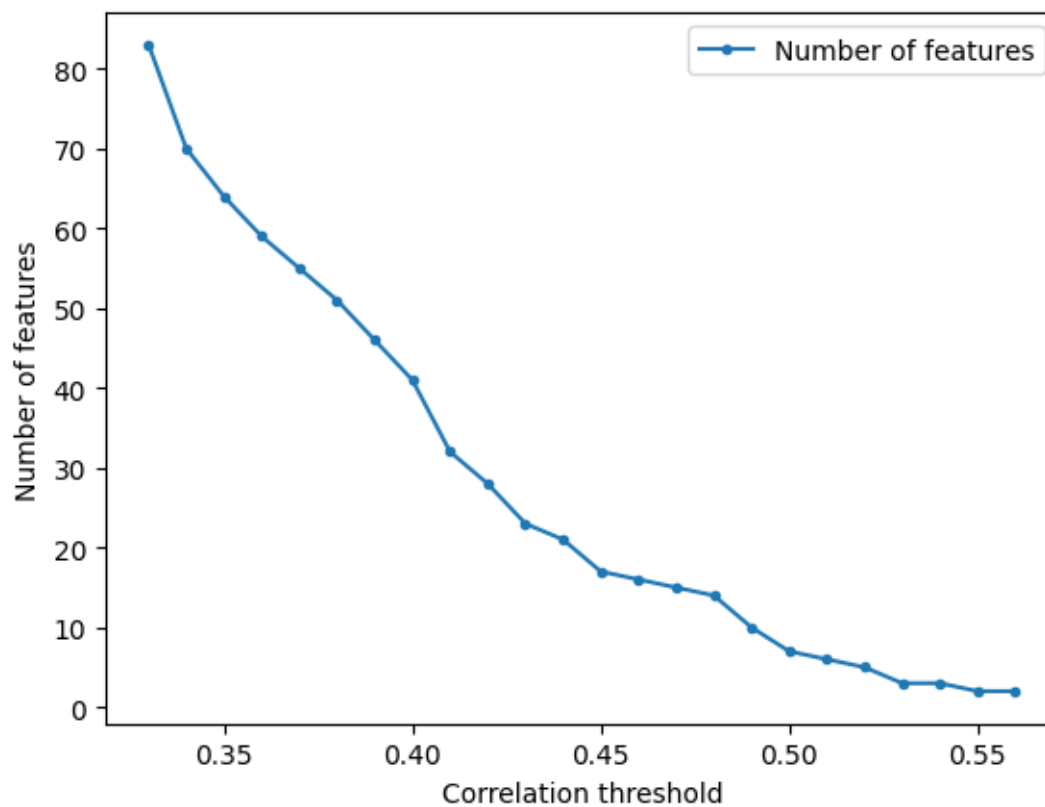

### 5.3 Store quality measurements

```
[45]: with pd.ExcelWriter('../Data/Quality_'+BALB_3T3+'_'+str(random_state)+'_'.  
      ↪xlsx') as writer:  
      df_linear.to_excel(writer, sheet_name='MLR')  
      df_decision_tree.to_excel(writer, sheet_name='DT')  
      df_random_forest.to_excel(writer, sheet_name='RF')  
      df_k_nearest.to_excel(writer, sheet_name='KNN')  
      df_svm.to_excel(writer, sheet_name='SVM')
```

# Notebook

January 18, 2024

## 1 File 20

```
[1]: import sys
from pathlib import Path
prediction_mode_path = Path("../module")
sys.path.append(prediction_mode_path.as_posix())
import models_creation as pred_model

import pandas as pd
import numpy as np

from sklearn.metrics import r2_score

import matplotlib.pyplot as plt
from sklearn.tree import plot_tree

from matplotlib import pyplot as plt

import joblib

import warnings
warnings.filterwarnings('ignore')
```

```
[2]: load_prepared_data = pd.read_excel('../Data/Kolchicyna_machine_learning.xlsx')
load_prepared_data = load_prepared_data.drop(columns=['Unnamed: 0'])

target = 'BALB/3T3'

corr_low = 0.33
corr_high = 0.58

random_state = 42
```

```
[3]: load_prepared_data.head()
```

```
[3]:
```

|   | AATSOZ    | AATSOare | AATSOd   | AATSOdv  | AATSOi     | AATSOm    | AATSOp   | \ |
|---|-----------|----------|----------|----------|------------|-----------|----------|---|
| 0 | 25.090909 | 6.046518 | 3.109091 | 6.662626 | 160.775045 | 99.075564 | 1.555512 |   |
| 1 | 24.448276 | 6.008422 | 3.051724 | 6.386973 | 161.021674 | 96.473315 | 1.538471 |   |

|   |           |          |          |          |            |           |          |
|---|-----------|----------|----------|----------|------------|-----------|----------|
| 2 | 23.868852 | 5.974074 | 3.000000 | 6.138434 | 161.244045 | 94.127025 | 1.523105 |
| 3 | 23.868852 | 5.974074 | 3.032787 | 6.171220 | 161.244045 | 94.127025 | 1.523105 |
| 4 | 23.343750 | 5.942945 | 2.953125 | 5.913194 | 161.445569 | 92.000700 | 1.509180 |

|   | AATS0pe  | AATS0s   | AATS0se  | ... | A549_float | MCF-7_float | LoVo_float | \ |
|---|----------|----------|----------|-----|------------|-------------|------------|---|
| 0 | 6.126680 | 3.435416 | 7.629859 | ... | 10.8       | 10.3        | 6.5        |   |
| 1 | 6.088791 | 3.330998 | 7.596891 | ... | 11.6       | 12.0        | 8.5        |   |
| 2 | 6.054630 | 3.236850 | 7.567166 | ... | 10.9       | 12.2        | 8.8        |   |
| 3 | 6.054630 | 3.257798 | 7.567166 | ... | 10.5       | 11.3        | 8.5        |   |
| 4 | 6.023670 | 3.151529 | 7.540228 | ... | 89.5       | 92.7        | 52.8       |   |

|   | LoVo/DX_float | BALB/3T3_float | A549_float_transformed | \ |
|---|---------------|----------------|------------------------|---|
| 0 | 54.9          | 10.2           | 7.966576               |   |
| 1 | 31.1          | 14.3           | 7.935542               |   |
| 2 | 17.9          | 11.7           | 7.962574               |   |
| 3 | 10.2          | 11.0           | 7.978811               |   |
| 4 | 77.8          | 99.4           | 7.048177               |   |

|   | MCF-7_float_transformed | LoVo_float_transformed | LoVo/DX_float_transformed | \ |
|---|-------------------------|------------------------|---------------------------|---|
| 0 | 7.987163                | 8.187087               | 7.260428                  |   |
| 1 | 7.920819                | 8.070581               | 7.507240                  |   |
| 2 | 7.913640                | 8.055517               | 7.747147                  |   |
| 3 | 7.946922                | 8.070581               | 7.991400                  |   |
| 4 | 7.032920                | 7.277366               | 7.109020                  |   |

|   | BALB/3T3_float_transformed |
|---|----------------------------|
| 0 | 7.991400                   |
| 1 | 7.844664                   |
| 2 | 7.931814                   |
| 3 | 7.958607                   |
| 4 | 7.002614                   |

[5 rows x 1221 columns]

```
[4]: data = load_prepared_data[list(load_prepared_data.columns)[0:-10]]
data[target] = load_prepared_data[load_prepared_data.columns[-1]]
data.head()
```

|   | AATS0Z    | AATS0are | AATS0d   | AATS0dv  | AATS0i     | AATS0m    | AATS0p   | \ |
|---|-----------|----------|----------|----------|------------|-----------|----------|---|
| 0 | 25.090909 | 6.046518 | 3.109091 | 6.662626 | 160.775045 | 99.075564 | 1.555512 |   |
| 1 | 24.448276 | 6.008422 | 3.051724 | 6.386973 | 161.021674 | 96.473315 | 1.538471 |   |
| 2 | 23.868852 | 5.974074 | 3.000000 | 6.138434 | 161.244045 | 94.127025 | 1.523105 |   |
| 3 | 23.868852 | 5.974074 | 3.032787 | 6.171220 | 161.244045 | 94.127025 | 1.523105 |   |
| 4 | 23.343750 | 5.942945 | 2.953125 | 5.913194 | 161.445569 | 92.000700 | 1.509180 |   |

|   | AATS0pe  | AATS0s   | AATS0se  | ... | piPC10   | piPC2    | piPC3    | piPC4    | \ |
|---|----------|----------|----------|-----|----------|----------|----------|----------|---|
| 0 | 6.126680 | 3.435416 | 7.629859 | ... | 7.999655 | 4.266195 | 4.915408 | 5.516700 |   |

|   |          |          |          |     |          |          |          |          |
|---|----------|----------|----------|-----|----------|----------|----------|----------|
| 1 | 6.088791 | 3.330998 | 7.596891 | ... | 8.018726 | 4.280132 | 4.922714 | 5.520711 |
| 2 | 6.054630 | 3.236850 | 7.567166 | ... | 8.028799 | 4.293878 | 4.929967 | 5.524706 |
| 3 | 6.054630 | 3.257798 | 7.567166 | ... | 8.037440 | 4.307438 | 4.929967 | 5.524706 |
| 4 | 6.023670 | 3.151529 | 7.540228 | ... | 8.034892 | 4.307438 | 4.937168 | 5.528685 |

|   | piPC5    | piPC6    | piPC7    | piPC8    | piPC9    | BALB/3T3 |
|---|----------|----------|----------|----------|----------|----------|
| 0 | 6.098566 | 6.595759 | 6.979116 | 7.337313 | 7.681445 | 7.991400 |
| 1 | 6.103048 | 6.601209 | 6.985613 | 7.349442 | 7.695531 | 7.844664 |
| 2 | 6.105281 | 6.603923 | 6.989306 | 7.353932 | 7.704023 | 7.931814 |
| 3 | 6.107510 | 6.606629 | 6.992068 | 7.361425 | 7.709420 | 7.958607 |
| 4 | 6.107510 | 6.605277 | 6.991148 | 7.356489 | 7.707175 | 7.002614 |

[5 rows x 1212 columns]

## 2 Multiple Linear regression (MLR)

```
[5]: without_standardization, train_r2_, test_r2_, hist1, hist2, target_column_name,
      ↪ training_data_RMSE, test_data_RMSE = pred_model.
      ↪ prepare_data_and_create_model(molecular_descriptors_df=data,
      ↪
      ↪ correlation_threshold=0.5,
      ↪
      ↪ standardization=False,
      ↪
      ↪ model_type='linear_model',
      ↪
      ↪ target_column_name = str(target),
      ↪
      ↪ random_state=random_state,
      ↪
      ↪ train_test_split_=True,
      ↪
      ↪ verbose=True)
```

I am not doing standardization...

|   | molecular descriptor name | corr_value |
|---|---------------------------|------------|
| 0 | AATS0Z                    | -0.020817  |
| 1 | AATS0are                  | -0.148257  |
| 2 | AATS0d                    | 0.022999   |
| 3 | AATS0dv                   | -0.137980  |



|     |                           |            |                            |
|-----|---------------------------|------------|----------------------------|
| 4   | AATSOi                    | 0.133257   |                            |
|     | molecular descriptor name | corr_value | absolute correlation value |
| 0   | AATSOZ                    | -0.020817  | 0.020817                   |
| 1   | AATSOare                  | -0.148257  | 0.148257                   |
| 2   | AATSOd                    | 0.022999   | 0.022999                   |
| 3   | AATSOdv                   | -0.137980  | 0.137980                   |
| 4   | AATSOi                    | 0.133257   | 0.133257                   |
|     | molecular descriptor name | corr_value | absolute correlation value |
| 226 | AMID_0                    | -0.546843  | 0.546843                   |
| 505 | EState_VSA5               | -0.588780  | 0.588780                   |
| 556 | GATS2c                    | 0.511671   | 0.511671                   |
| 791 | MDEO-12                   | -0.582747  | 0.582747                   |
| 847 | NdO                       | -0.500462  | 0.500462                   |
|     | molecular descriptor name | corr_value | absolute correlation value |
| 226 | AMID_0                    | -0.546843  | 0.546843                   |
| 505 | EState_VSA5               | -0.588780  | 0.588780                   |
| 556 | GATS2c                    | 0.511671   | 0.511671                   |
| 791 | MDEO-12                   | -0.582747  | 0.582747                   |
| 847 | NdO                       | -0.500462  | 0.500462                   |

The model used is: LinearReg..

Return the coefficient of determination of the prediction:

0.4009396151775283

R<sup>2</sup> score: 0.5596286877136032

Correlation coefficient: 0.7480833427590827

Test data - unseen during training:

R<sup>2</sup> score: 0.4009396151775283

Correlation coefficient: 0.6331979273319902

[8.01069718 8.00147704 7.32934201 7.05871281 5.8496097 7.6259535  
7.85353668 7.58094605 7.6505256 7.32688798 7.52250572 6.68303412  
7.70848619 6.37971395 7.08878708 8.02437081 7.42197046 7.52846533]

44 8.004365  
47 7.886057  
4 7.002614  
55 7.698970  
26 5.070734  
64 8.060481  
73 7.130768  
10 8.008774  
40 7.795880  
107 8.086186  
18 6.924818  
62 8.173925  
11 7.962574  
36 6.346787  
89 8.102373  
91 8.346787  
109 7.886057  
0 7.991400

Name: BALB/3T3, dtype: float64  
Training Root Mean Square Error: 0.5846600833873117  
Testing Root Mean Square Error: 0.6162259719902169

```
[6]: print(target_column_name+str('_transformed'))  
      print(hist1[target_column_name].hist())
```

BALB/3T3\_transformed  
AxesSubplot(0.125,0.11;0.775x0.77)



```
[7]: with_standardization, train_r2_, test_r2_, hist1, hist2, target_column_name,   
      ↪ training_data_RMSE, test_data_RMSE = pred_model.  
      ↪ prepare_data_and_create_model(molecular_descriptors_df=data,  
  
      ↪ correlation_threshold=0.50,  
  
      ↪ standardization=True,  
  
      ↪ model_type='linear_model',  
  
      ↪ target_column_name = target,
```

```

↪          random_state=random_state,
↪          train_test_split_=True,
↪          verbose=True)

```

I am doing standardization...

|   | molecular descriptor name | corr_value | absolute correlation value |
|---|---------------------------|------------|----------------------------|
| 0 | AATSOZ                    | -0.020817  | 0.020817                   |
| 1 | AATSOare                  | -0.148257  | 0.148257                   |
| 2 | AATSOd                    | 0.022999   | 0.022999                   |
| 3 | AATSOdv                   | -0.137980  | 0.137980                   |
| 4 | AATSOi                    | 0.133257   | 0.133257                   |

  

|   | molecular descriptor name | corr_value | absolute correlation value |
|---|---------------------------|------------|----------------------------|
| 0 | AATSOZ                    | -0.020817  | 0.020817                   |
| 1 | AATSOare                  | -0.148257  | 0.148257                   |
| 2 | AATSOd                    | 0.022999   | 0.022999                   |
| 3 | AATSOdv                   | -0.137980  | 0.137980                   |
| 4 | AATSOi                    | 0.133257   | 0.133257                   |

  

|     | molecular descriptor name | corr_value | absolute correlation value |
|-----|---------------------------|------------|----------------------------|
| 226 | AMID_0                    | -0.546843  | 0.546843                   |
| 505 | EState_VSA5               | -0.588780  | 0.588780                   |
| 556 | GATS2c                    | 0.511671   | 0.511671                   |
| 791 | MDEO-12                   | -0.582747  | 0.582747                   |
| 847 | NdO                       | -0.500462  | 0.500462                   |

The model used is: LinearReg..

Return the coefficient of determination of the prediction:

0.4009396151775283

R<sup>2</sup> score: 0.5596286877136032

Correlation coefficient: 0.7480833427590827

Test data - unseen during training:

R<sup>2</sup> score: 0.4009396151775283

Correlation coefficient: 0.6331979273319902

[8.01069718 8.00147704 7.32934201 7.05871281 5.8496097 7.6259535

```

7.85353668 7.58094605 7.6505256 7.32688798 7.52250572 6.68303412
7.70848619 6.37971395 7.08878708 8.02437081 7.42197046 7.52846533]
44      8.004365
47      7.886057
4       7.002614
55      7.698970
26      5.070734
64      8.060481
73      7.130768
10      8.008774
40      7.795880
107     8.086186
18      6.924818
62      8.173925
11      7.962574
36      6.346787
89      8.102373
91      8.346787
109     7.886057
0       7.991400
Name: BALB/3T3, dtype: float64
Training Root Mean Square Error: 0.5846600833873117
Testing Root Mean Square Error: 0.6162259719902169

```

## 2.1 Search inside correlation space

```

[8]: step = 0.01
initial_step = corr_low
last_step = corr_high
first_list = [x / 100.0 for x in range(int(initial_step*100),
↳int(last_step*100), int(step*100))]
second_list = []
third_list = []
fourth_l = []
fifth_l = []
f_list = []
for i in first_list:
    without_standardization, train_r2, test_r2, _, h_, target_column_name,
↳training_data_RMSE, test_data_RMSE = pred_model.
↳prepare_data_and_create_model(molecular_descriptors_df = data,

↳
correlation_threshold = i,

↳
standardization = False,

↳
model_type = 'linear_model',

```

```

    ↪          target_column_name = target,
    ↪          random_state=random_state,
    ↪          train_test_split_ = True,
    ↪          verbose = False)
second_list.append(train_r2)
third_list.append(test_r2)
fourth_l.append(training_data_RMSE)
fifth_l.append(test_data_RMSE)
f_list.append(len(h_))

```

```

[9]: df_without_standardization = pd.DataFrame(data=first_list,
    ↪columns=["Correlation threshold"])
df_without_standardization['Training data R^2 score'] = second_list
df_without_standardization['Test data R^2 score'] = third_list
df_without_standardization['Training RMSE'] = fourth_l
df_without_standardization['Test RMSE'] = fifth_l
df_without_standardization['Number of features'] = f_list

```

```

[10]: df_linear = df_without_standardization.copy()
df_without_standardization

```

```

[10]:
Correlation threshold  Training data R^2 score  Test data R^2 score  \
0                    0.33                    0.977568          -0.972190
1                    0.34                    0.920734           0.635875
2                    0.35                    0.915551           0.700364
3                    0.36                    0.908437           0.515587
4                    0.37                    0.895571           0.347253
5                    0.38                    0.858816           0.051724
6                    0.39                    0.809659           0.155354
7                    0.40                    0.794374           0.027209
8                    0.41                    0.725684           0.086462
9                    0.42                    0.656192           0.609335
10                   0.43                    0.633192           0.710255
11                   0.44                    0.630292           0.721657
12                   0.45                    0.611501           0.562029
13                   0.46                    0.611461           0.563456
14                   0.47                    0.611021           0.551893
15                   0.48                    0.609700           0.541209
16                   0.49                    0.588355           0.449447
17                   0.50                    0.559629           0.400940
18                   0.51                    0.533961           0.451107
19                   0.52                    0.531025           0.459570
20                   0.53                    0.499084           0.508269

```

|    |      |          |          |
|----|------|----------|----------|
| 21 | 0.54 | 0.499084 | 0.508269 |
| 22 | 0.55 | 0.477930 | 0.485309 |
| 23 | 0.56 | 0.477930 | 0.485309 |

|    | Training RMSE | Test RMSE | Number of features |
|----|---------------|-----------|--------------------|
| 0  | 0.131955      | 1.118096  | 83                 |
| 1  | 0.248049      | 0.480430  | 70                 |
| 2  | 0.256030      | 0.435814  | 64                 |
| 3  | 0.266596      | 0.554131  | 59                 |
| 4  | 0.284712      | 0.643246  | 55                 |
| 5  | 0.331045      | 0.775304  | 51                 |
| 6  | 0.384380      | 0.731715  | 46                 |
| 7  | 0.399515      | 0.785262  | 41                 |
| 8  | 0.461444      | 0.760971  | 32                 |
| 9  | 0.516597      | 0.497631  | 28                 |
| 10 | 0.533597      | 0.428561  | 23                 |
| 11 | 0.535702      | 0.420044  | 21                 |
| 12 | 0.549147      | 0.526899  | 17                 |
| 13 | 0.549176      | 0.526040  | 16                 |
| 14 | 0.549486      | 0.532961  | 15                 |
| 15 | 0.550419      | 0.539277  | 14                 |
| 16 | 0.565269      | 0.590751  | 10                 |
| 17 | 0.584660      | 0.616226  | 7                  |
| 18 | 0.601457      | 0.589859  | 6                  |
| 19 | 0.603350      | 0.585295  | 5                  |
| 20 | 0.623557      | 0.558301  | 3                  |
| 21 | 0.623557      | 0.558301  | 3                  |
| 22 | 0.636588      | 0.571187  | 2                  |
| 23 | 0.636588      | 0.571187  | 2                  |

```
[ ]:
```

## 2.2 Plots

```
[11]: plt.plot(df_without_standardization['Correlation threshold'],
             df_without_standardization['Training data R^2 score'], label = "Training
             data R^2 score", marker='v')
plt.plot(df_without_standardization['Correlation threshold'],
             df_without_standardization['Test data R^2 score'], label = "Test data R^2
             score", marker='D')
plt.legend()
plt.xlabel('Correlation threshold')
plt.ylabel('R^2 score')
plt.ylim([0, 1])
plt.show()
```

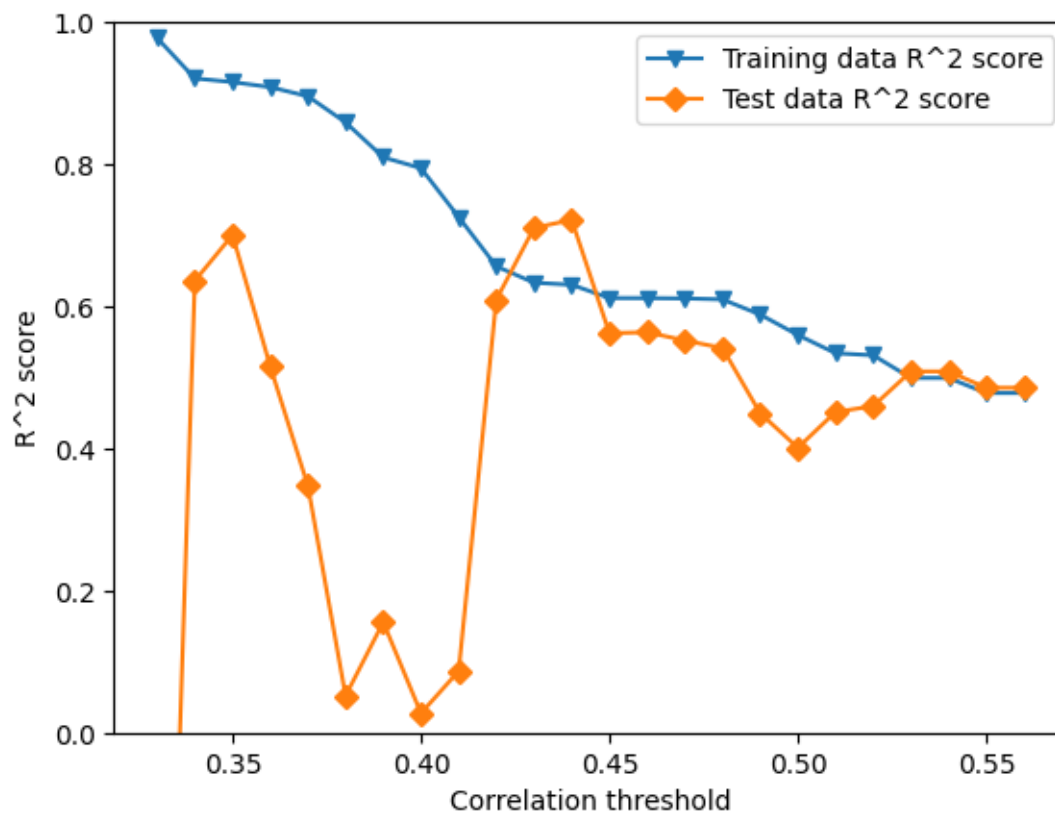

```
[12]: plt.plot(df_without_standardization['Correlation threshold'],
             df_without_standardization['Number of features'], label = "Number of
             features", marker='.')
plt.legend()
plt.xlabel('Correlation threshold')
plt.ylabel('Number of features')
plt.show()
```



[ ]:

## 2.3 Decision Tree

```
[13]: without_standardization, train_r2_, test_r2_, hist1, hist2, target_column_name,
      ↪ training_data_RMSE, test_data_RMSE = pred_model.
      ↪ prepare_data_and_create_model(molecular_descriptors_df=data,
      ↪
      ↪         correlation_threshold=0.50,
      ↪
      ↪         standardization=False,
      ↪
      ↪         model_type='DecisionTreeRegressor',
      ↪
      ↪         max_depth=5,
      ↪
      ↪         target_column_name = target,
      ↪
      ↪         random_state=random_state,
```



```

↪          train_test_split_=True,
↪          verbose=True)

```

I am not doing standardization...

|     | molecular descriptor name |            |                            |
|-----|---------------------------|------------|----------------------------|
| 0   | AATSOZ                    |            |                            |
| 1   | AATSOare                  |            |                            |
| 2   | AATSOd                    |            |                            |
| 3   | AATSOdv                   |            |                            |
| 4   | AATSOi                    |            |                            |
|     | molecular descriptor name | corr_value |                            |
| 0   | AATSOZ                    | -0.020817  |                            |
| 1   | AATSOare                  | -0.148257  |                            |
| 2   | AATSOd                    | 0.022999   |                            |
| 3   | AATSOdv                   | -0.137980  |                            |
| 4   | AATSOi                    | 0.133257   |                            |
|     | molecular descriptor name | corr_value | absolute correlation value |
| 0   | AATSOZ                    | -0.020817  | 0.020817                   |
| 1   | AATSOare                  | -0.148257  | 0.148257                   |
| 2   | AATSOd                    | 0.022999   | 0.022999                   |
| 3   | AATSOdv                   | -0.137980  | 0.137980                   |
| 4   | AATSOi                    | 0.133257   | 0.133257                   |
|     | molecular descriptor name | corr_value | absolute correlation value |
| 226 | AMID_0                    | -0.546843  | 0.546843                   |
| 505 | EState_VSA5               | -0.588780  | 0.588780                   |
| 556 | GATS2c                    | 0.511671   | 0.511671                   |
| 791 | MDEO-12                   | -0.582747  | 0.582747                   |
| 847 | NdO                       | -0.500462  | 0.500462                   |
|     | molecular descriptor name | corr_value | absolute correlation value |
| 226 | AMID_0                    | -0.546843  | 0.546843                   |
| 505 | EState_VSA5               | -0.588780  | 0.588780                   |
| 556 | GATS2c                    | 0.511671   | 0.511671                   |
| 791 | MDEO-12                   | -0.582747  | 0.582747                   |
| 847 | NdO                       | -0.500462  | 0.500462                   |

The model used is: DecisionTree...

Return the coefficient of determination of the prediction:

0.5592532851606207

R<sup>2</sup> score: 0.8558567162424137

Correlation coefficient: 0.9251252435440369

Test data - unseen during training:

R<sup>2</sup> score: 0.5592532851606207

Correlation coefficient: 0.7478323910881506

[7.1136393 7.84909171 7.31397077 7.00060493 5.12662126 7.84909171  
7.84909171 7.84909171 7.84909171 7.84909171 7.1136393 7.31397077  
7.84909171 6.56863624 7.31397077 7.1136393 7.84909171 7.84909171]

44 8.004365

```
47      7.886057
4       7.002614
55      7.698970
26      5.070734
64      8.060481
73      7.130768
10      8.008774
40      7.795880
107     8.086186
18      6.924818
62      8.173925
11      7.962574
36      6.346787
89      8.102373
91      8.346787
109     7.886057
0       7.991400
```

Name: BALB/3T3, dtype: float64

Training Root Mean Square Error: 0.33449616294891693

Testing Root Mean Square Error: 0.5285660197089223

```
[14]: print(target_column_name+str('_transformed'))
      print(hist1[target_column_name].hist())
```

BALB/3T3\_transformed

AxesSubplot(0.125,0.11;0.775x0.77)



```
[15]: with_standardization, train_r2_, test_r2_, hist1, hist2, target_column_name,
      ↪ training_data_RMSE, test_data_RMSE = pred_model.
      ↪ prepare_data_and_create_model(molecular_descriptors_df=data,
      ↪
      ↪         correlation_threshold=0.50,
      ↪
      ↪         standardization=True,
      ↪
      ↪         model_type='DecisionTreeRegressor',
      ↪
      ↪         max_depth=5,
      ↪
      ↪         target_column_name = target,
      ↪
      ↪         random_state=random_state,
      ↪
      ↪         train_test_split_=True,
      ↪
      ↪         verbose=True)
```

I am doing standardization...  
 molecular descriptor name

|     |                           |            |                            |
|-----|---------------------------|------------|----------------------------|
| 0   | AATSOZ                    |            |                            |
| 1   | AATSOare                  |            |                            |
| 2   | AATSOd                    |            |                            |
| 3   | AATSOdv                   |            |                            |
| 4   | AATSOi                    |            |                            |
|     | molecular descriptor name | corr_value |                            |
| 0   | AATSOZ                    | -0.020817  |                            |
| 1   | AATSOare                  | -0.148257  |                            |
| 2   | AATSOd                    | 0.022999   |                            |
| 3   | AATSOdv                   | -0.137980  |                            |
| 4   | AATSOi                    | 0.133257   |                            |
|     | molecular descriptor name | corr_value | absolute correlation value |
| 0   | AATSOZ                    | -0.020817  | 0.020817                   |
| 1   | AATSOare                  | -0.148257  | 0.148257                   |
| 2   | AATSOd                    | 0.022999   | 0.022999                   |
| 3   | AATSOdv                   | -0.137980  | 0.137980                   |
| 4   | AATSOi                    | 0.133257   | 0.133257                   |
|     | molecular descriptor name | corr_value | absolute correlation value |
| 226 | AMID_0                    | -0.546843  | 0.546843                   |
| 505 | EState_VSA5               | -0.588780  | 0.588780                   |
| 556 | GATS2c                    | 0.511671   | 0.511671                   |
| 791 | MDEO-12                   | -0.582747  | 0.582747                   |
| 847 | NdO                       | -0.500462  | 0.500462                   |
|     | molecular descriptor name | corr_value | absolute correlation value |
| 226 | AMID_0                    | -0.546843  | 0.546843                   |
| 505 | EState_VSA5               | -0.588780  | 0.588780                   |
| 556 | GATS2c                    | 0.511671   | 0.511671                   |
| 791 | MDEO-12                   | -0.582747  | 0.582747                   |
| 847 | NdO                       | -0.500462  | 0.500462                   |

The model used is: DecisionTree...

Return the coefficient of determination of the prediction:  
0.5592532851606207

R<sup>2</sup> score: 0.8558567162424137

Correlation coefficient: 0.9251252435440369

Test data - unseen during training:  
R<sup>2</sup> score: 0.5592532851606207

Correlation coefficient: 0.7478323910881506

[7.1136393 7.84909171 7.31397077 7.00060493 5.12662126 7.84909171  
7.84909171 7.84909171 7.84909171 7.84909171 7.1136393 7.31397077  
7.84909171 6.56863624 7.31397077 7.1136393 7.84909171 7.84909171]

|    |          |
|----|----------|
| 44 | 8.004365 |
| 47 | 7.886057 |
| 4  | 7.002614 |
| 55 | 7.698970 |
| 26 | 5.070734 |
| 64 | 8.060481 |
| 73 | 7.130768 |
| 10 | 8.008774 |

```

40      7.795880
107     8.086186
18      6.924818
62      8.173925
11      7.962574
36      6.346787
89      8.102373
91      8.346787
109     7.886057
0       7.991400

```

Name: BALB/3T3, dtype: float64

Training Root Mean Square Error: 0.33449616294891693

Testing Root Mean Square Error: 0.5285660197089223

## 2.4 Search inside correlation space

```

[16]: step = 0.01
initial_step = corr_low
last_step = corr_high
first_list = [x / 100.0 for x in range(int(initial_step*100),
    ↳int(last_step*100), int(step*100))]
max_depth = [range(2, 30, 1)]
corr_th = []
second_list = []
third_list = []
fourth_l = []
fifth_l = []
f_list = []
fif_list = []
for i in first_list:
    for depth in max_depth[0]:

        without_standardization, train_r2, test_r2, _, h_, target_column_name,
    ↳training_data_RMSE, test_data_RMSE = pred_model.
    ↳prepare_data_and_create_model(molecular_descriptors_df=data,

    ↳                                correlation_threshold=i,
    ↳                                standardization=False,
    ↳                                model_type='DecisionTreeRegressor',
    ↳                                max_depth=depth,
    ↳                                target_column_name = target,
    ↳                                random_state=random_state,

```

```

↪          train_test_split_=True,
↪          verbose=False)
    corr_th.append(i)
    second_list.append(train_r2)
    third_list.append(test_r2)
    fourth_l.append(training_data_RMSE)
    fifth_l.append(test_data_RMSE)
    f_list.append(len(h_))
    fif_list.append(depth)

```

```

[17]: df_without_standardization = pd.DataFrame(data=corr_th, columns=["Correlation_
↪threshold"])
df_without_standardization['Training data R^2 score'] = second_list
df_without_standardization['Test data R^2 score'] = third_list
df_without_standardization['Training RMSE'] = fourth_l
df_without_standardization['Test RMSE'] = fifth_l
df_without_standardization['Number of features'] = f_list
df_without_standardization['Depth number'] = fif_list

```

```

[18]: df_decision_tree = df_without_standardization.copy()
#df_without_standardization.to_excel('../Data/
↪A549_Decision_tree_rs_'+str(random_state)+'.xlsx')

```

## 2.5 Plots

```
[19]: corre_list = [x / 100.0 for x in range(int(initial_step*100),
    ↪int(last_step*100), int(0.01*100))]
for element in corre_list:
    element_ =
    ↪df_without_standardization[df_without_standardization['Correlation_
    ↪threshold'] == float(element)]
    plt.plot(element_['Depth number'], element_['Training data R^2 score'],
    ↪label = "Training data R^2 score", marker='v')
    plt.plot(element_['Depth number'], element_['Test data R^2 score'], label =
    ↪"Test data R^2 score", marker='D')
    plt.legend()
    plt.xlabel('Depth number -> correlation threshold: '+str(element)+'.' \n
    ↪Number of features: '+str(element_['Number of features'].iloc[0]),
    ↪fontweight='bold')
    plt.xlim(max(element_['Depth number'])+1, min(element_['Depth number'])-1)
    plt.ylabel('R^2 score')
    plt.ylim([0, 1])
    plt.rc('grid', linestyle="-. ", color='black')
    plt.grid(True)
    plt.show()
```

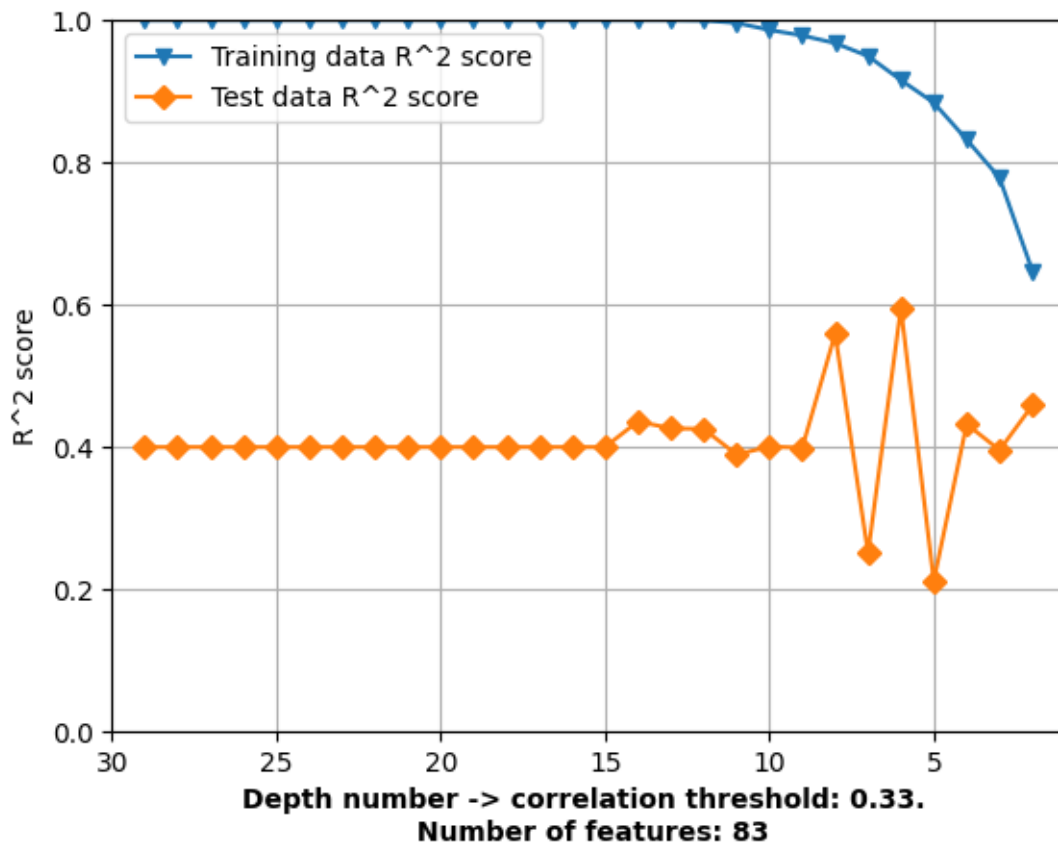

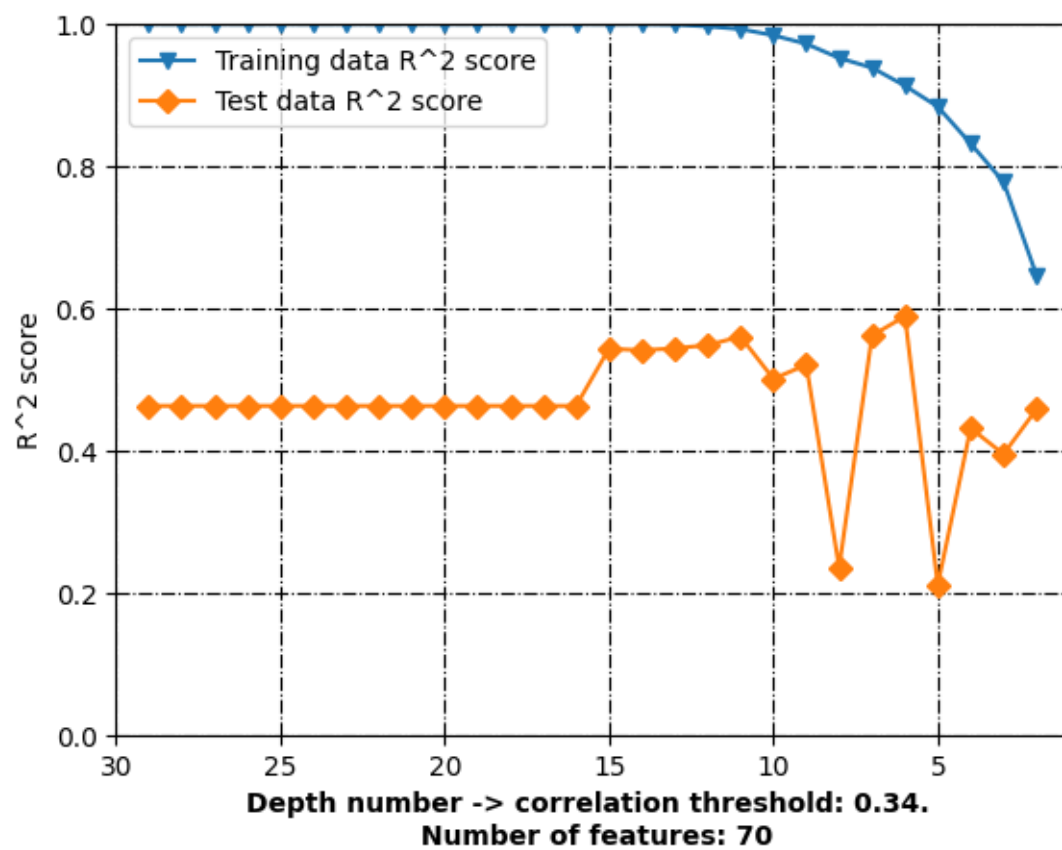



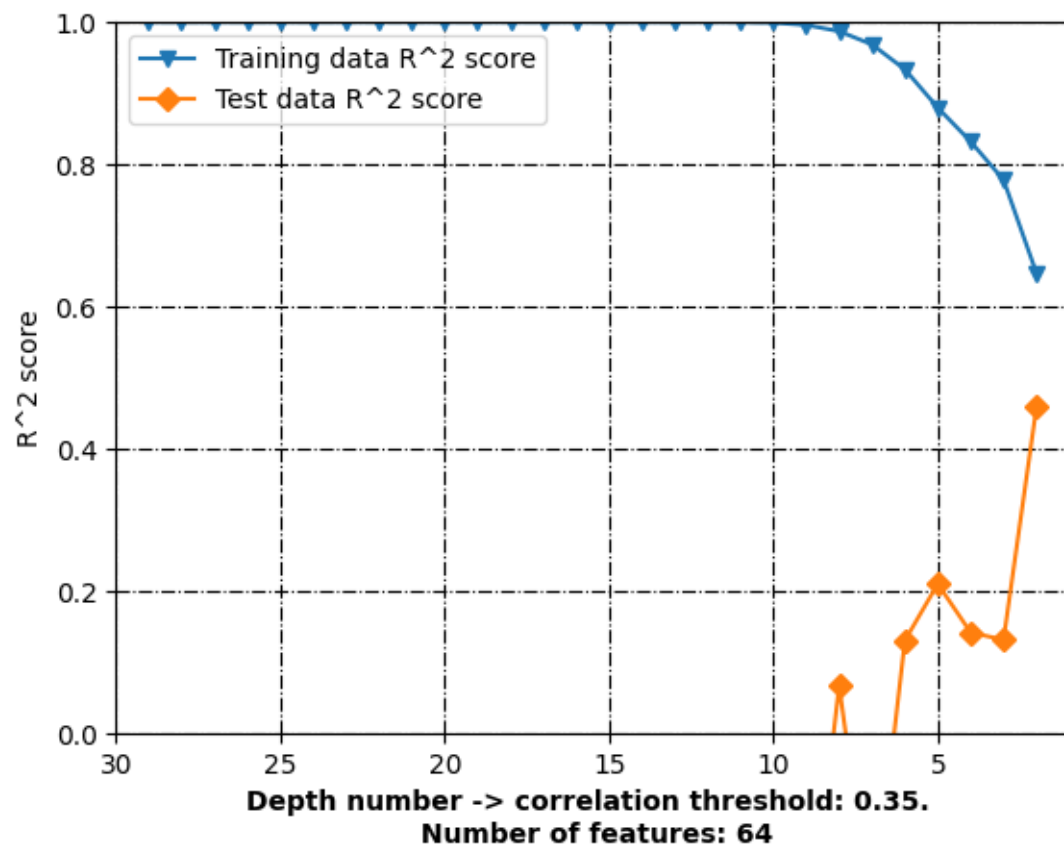

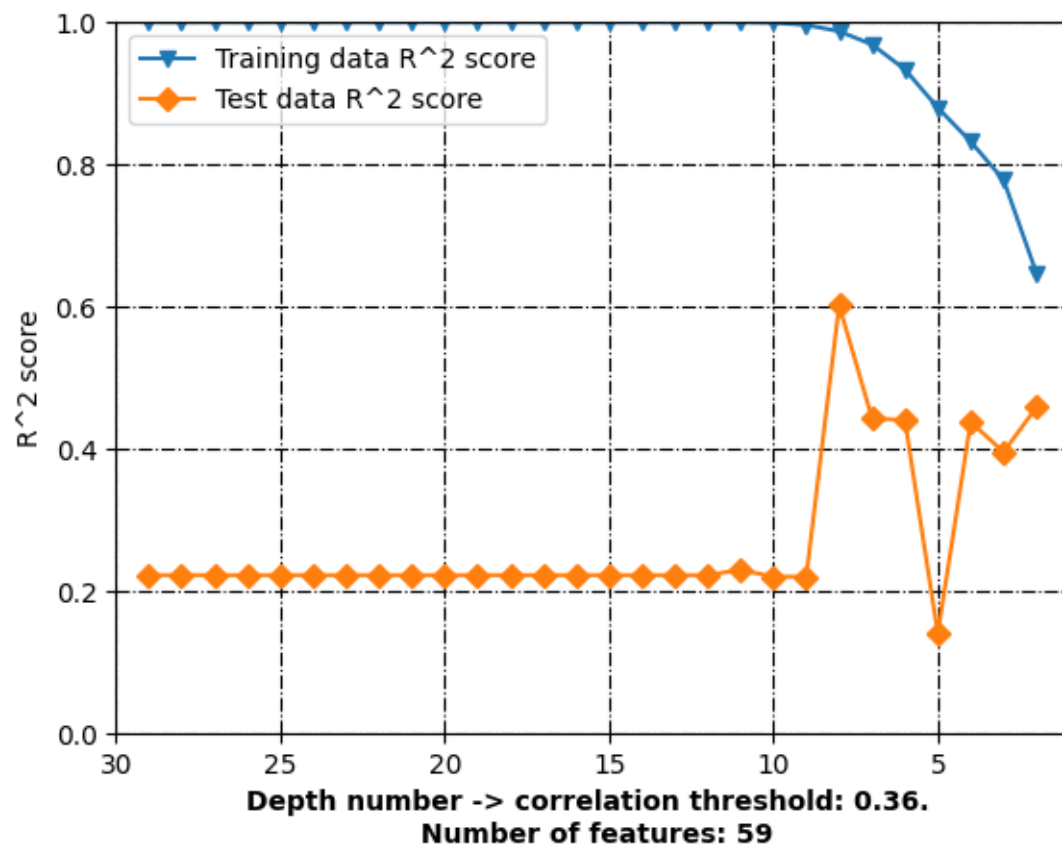

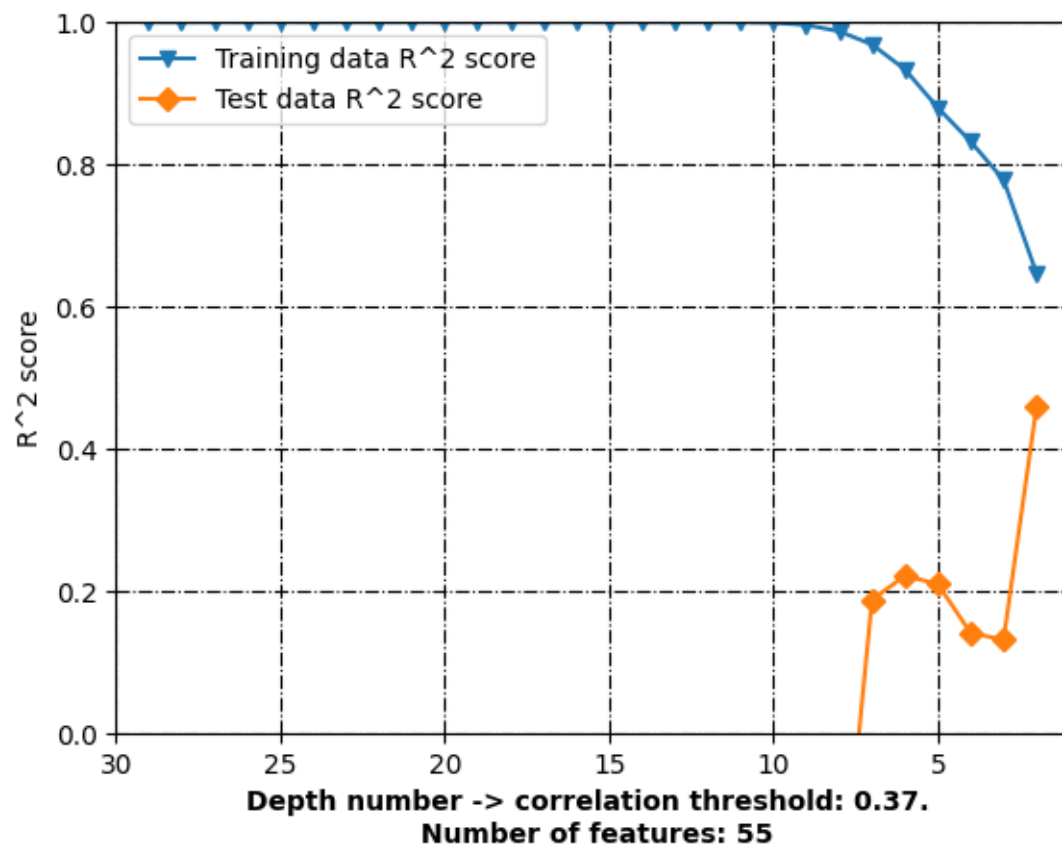

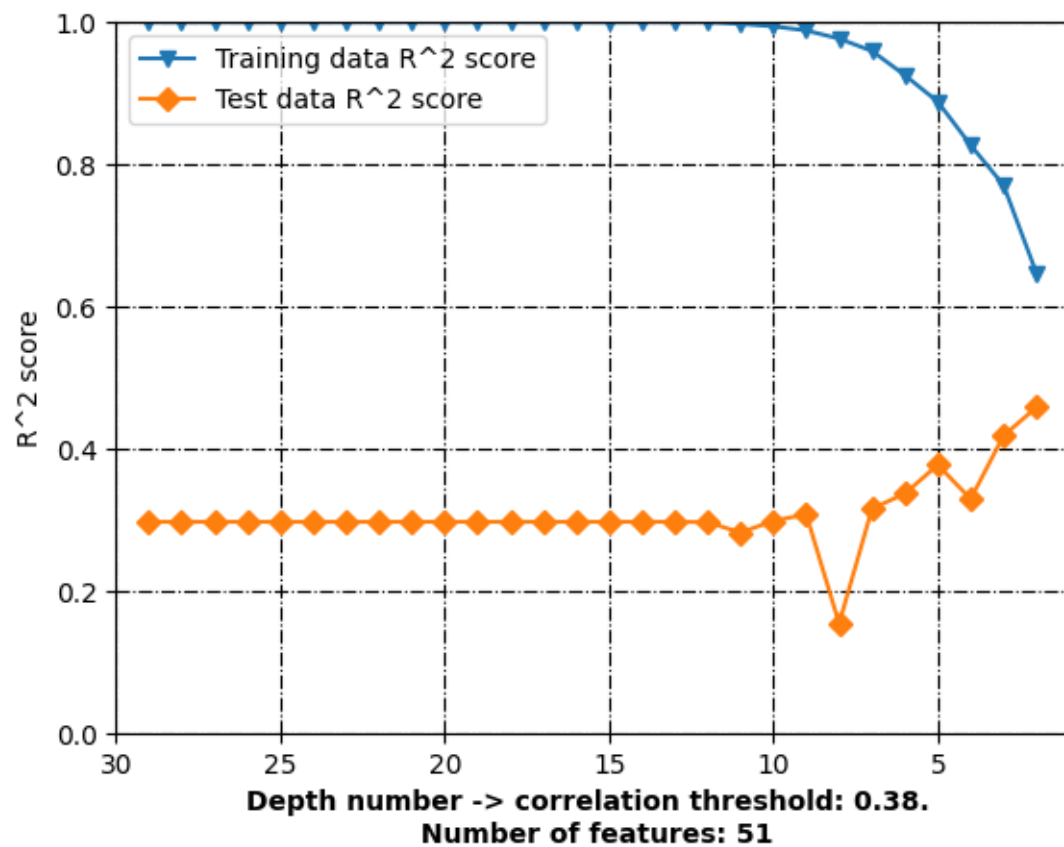

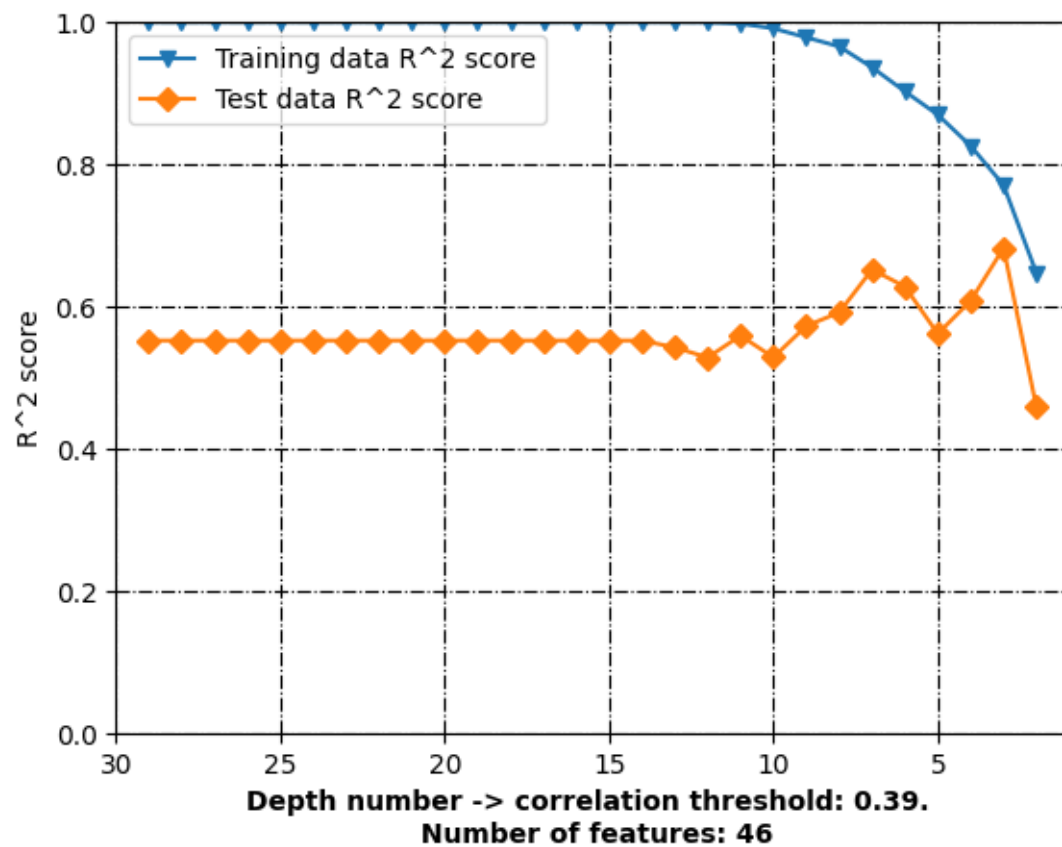

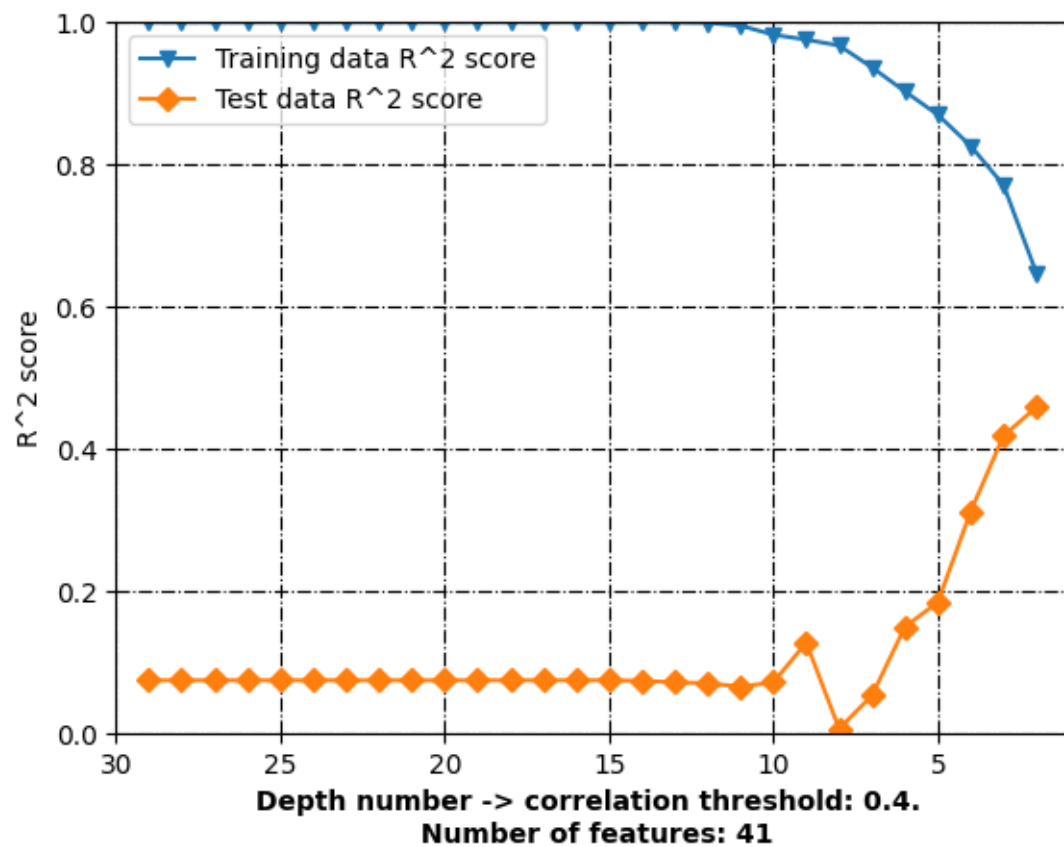

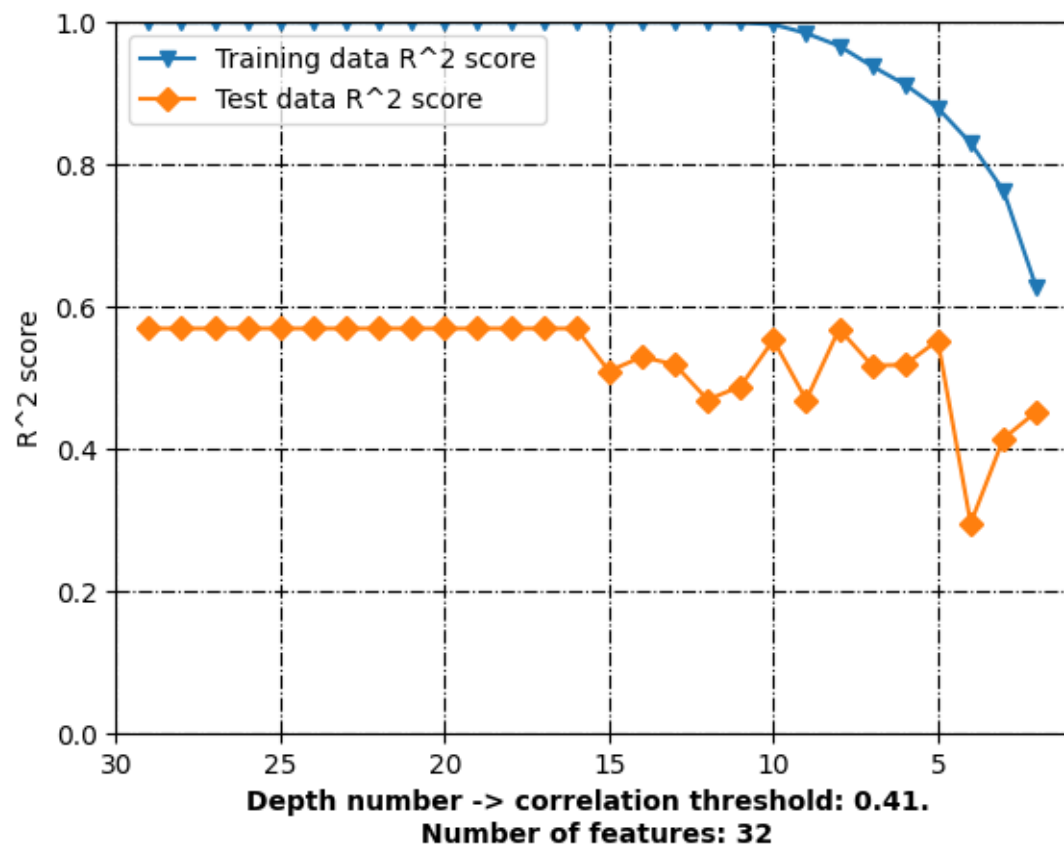

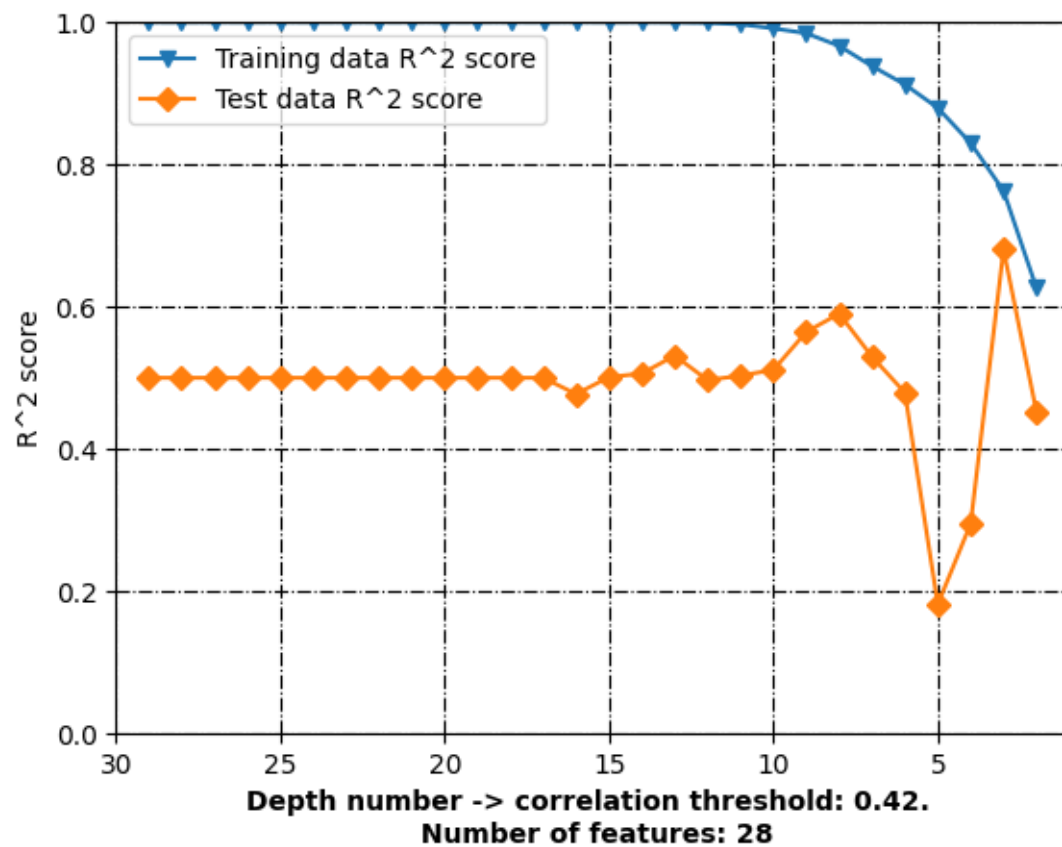



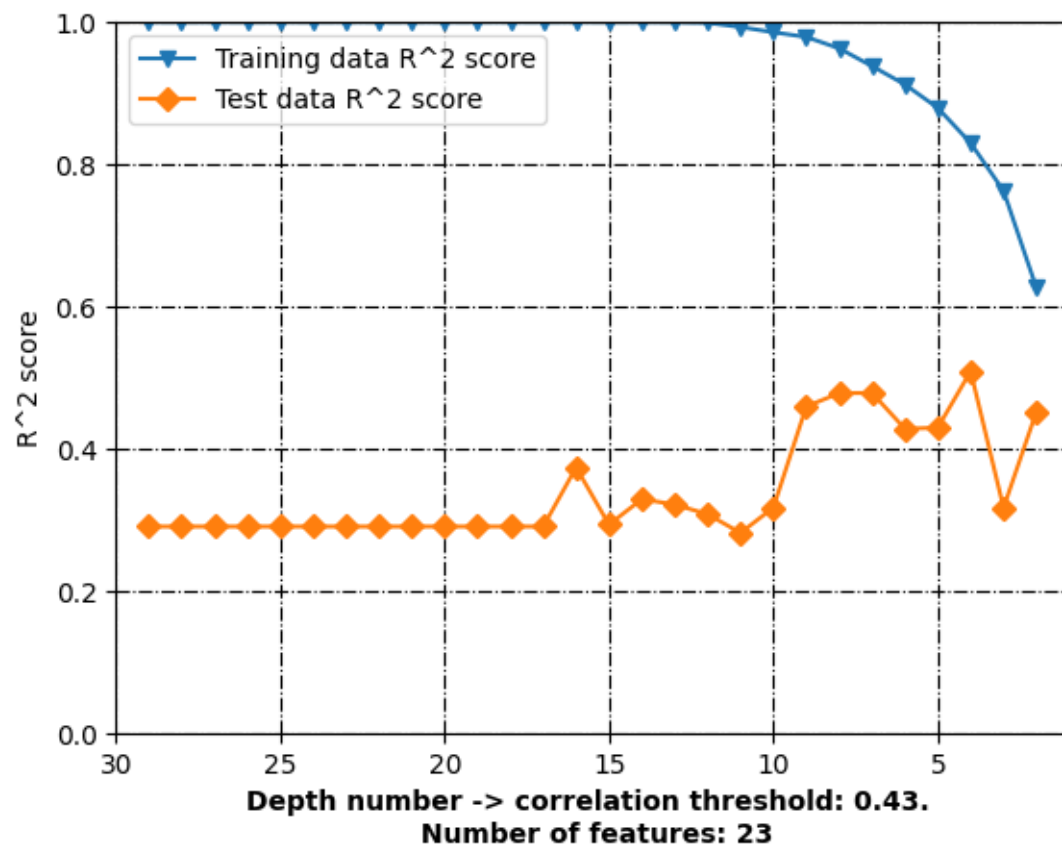

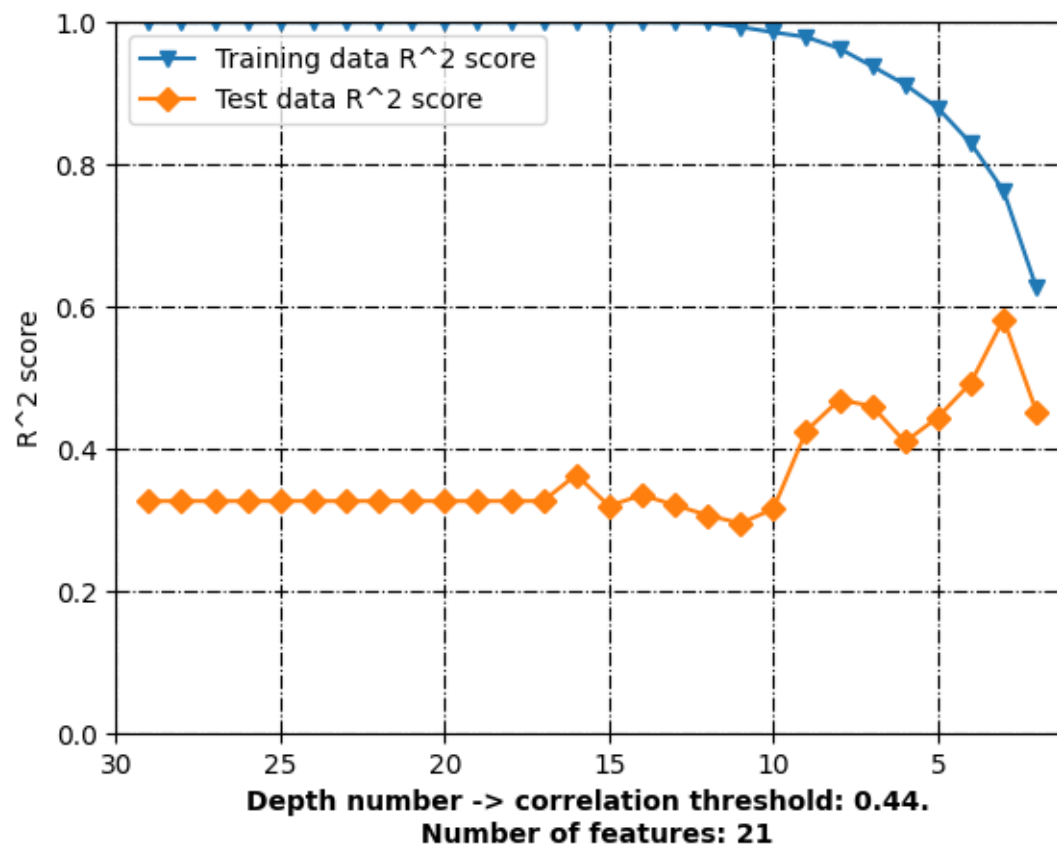

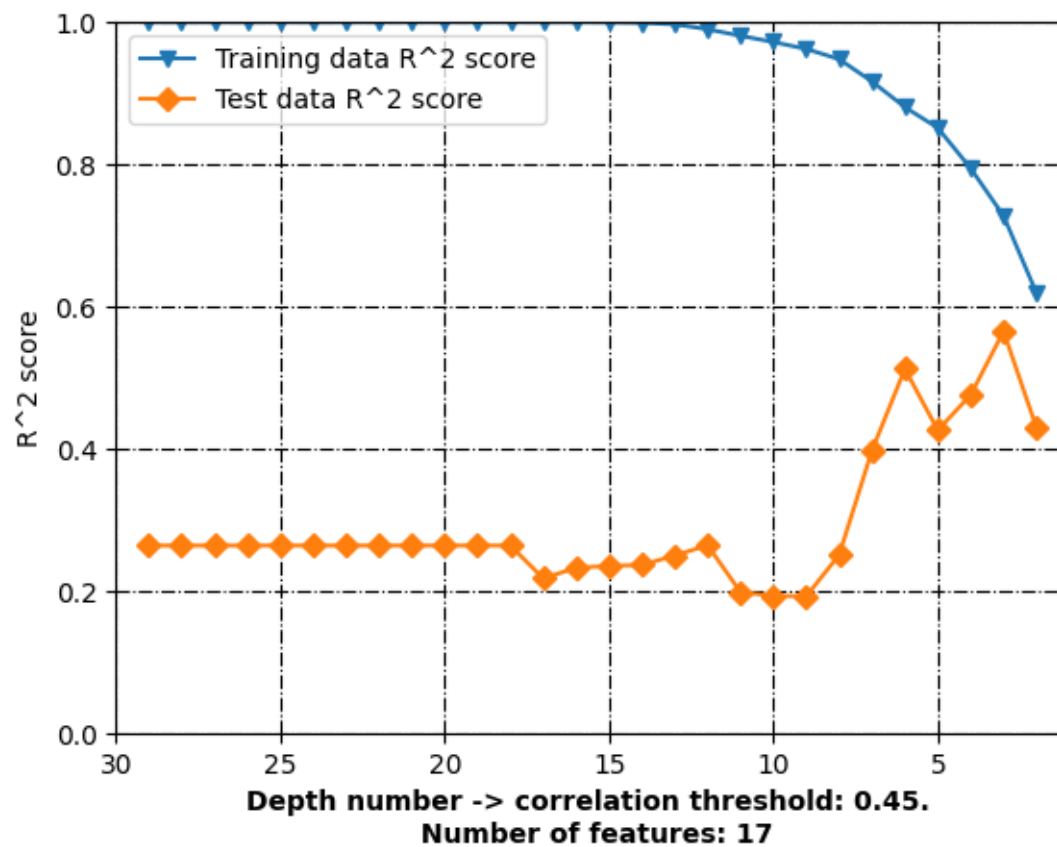

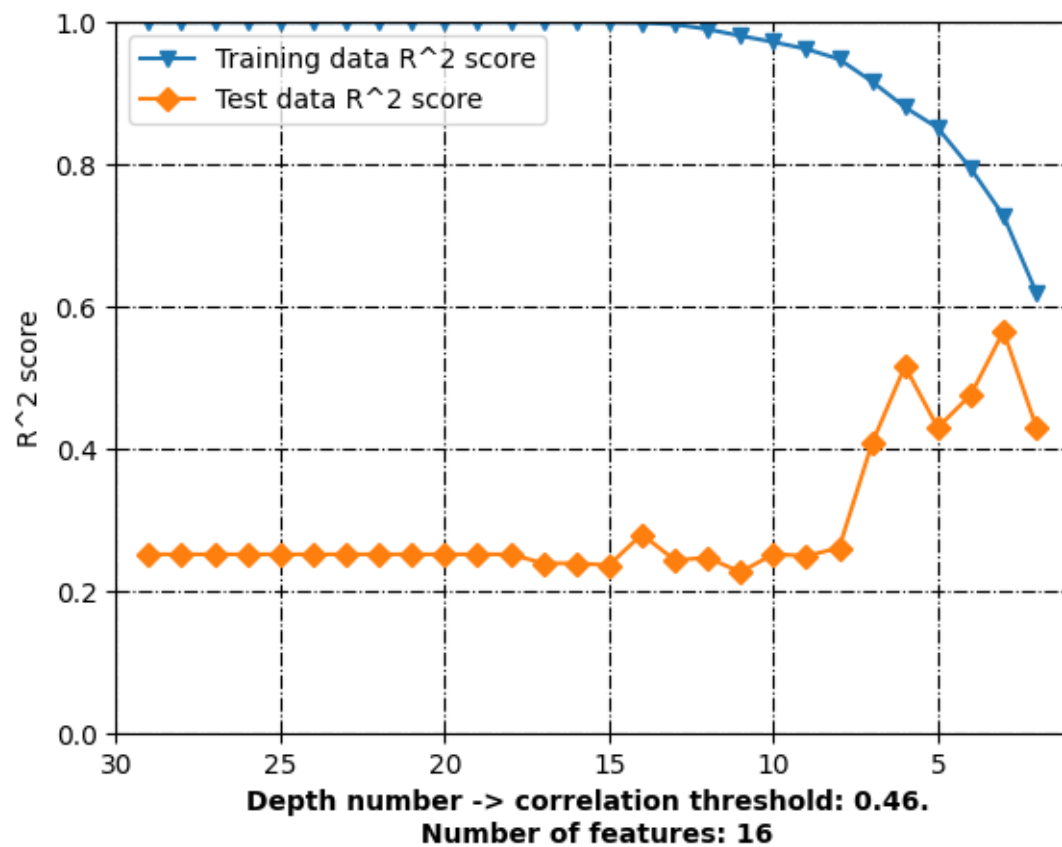

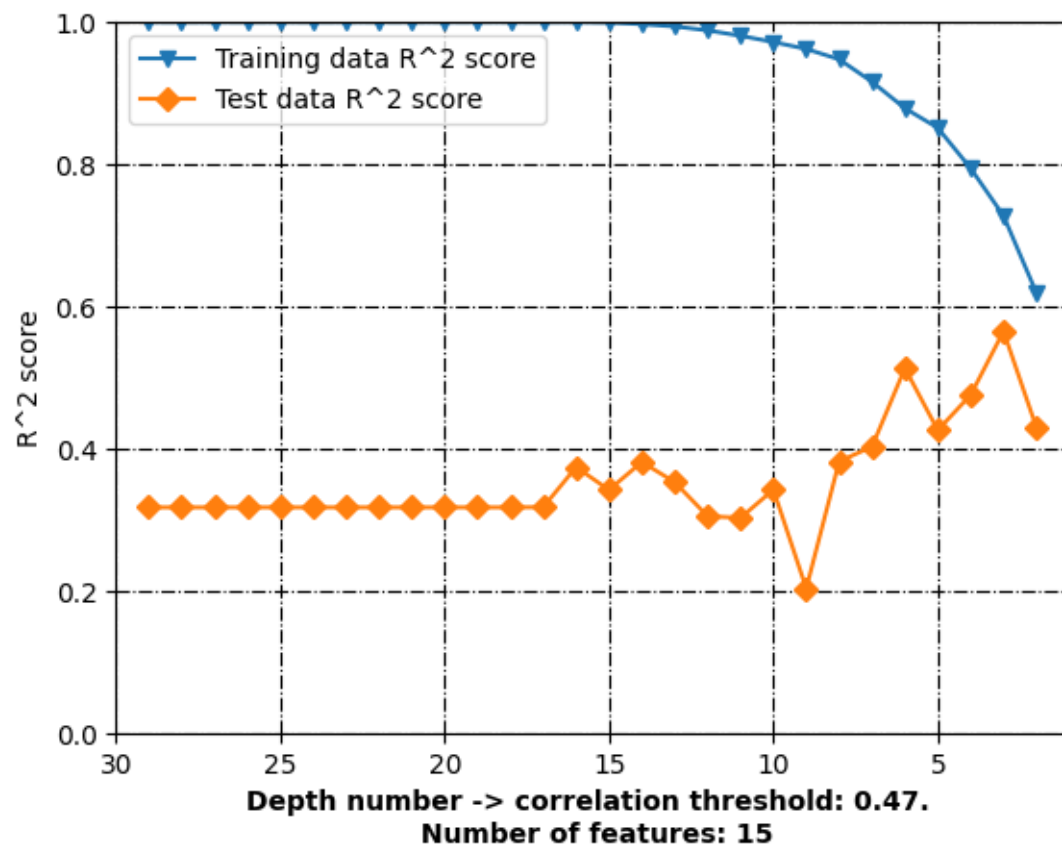

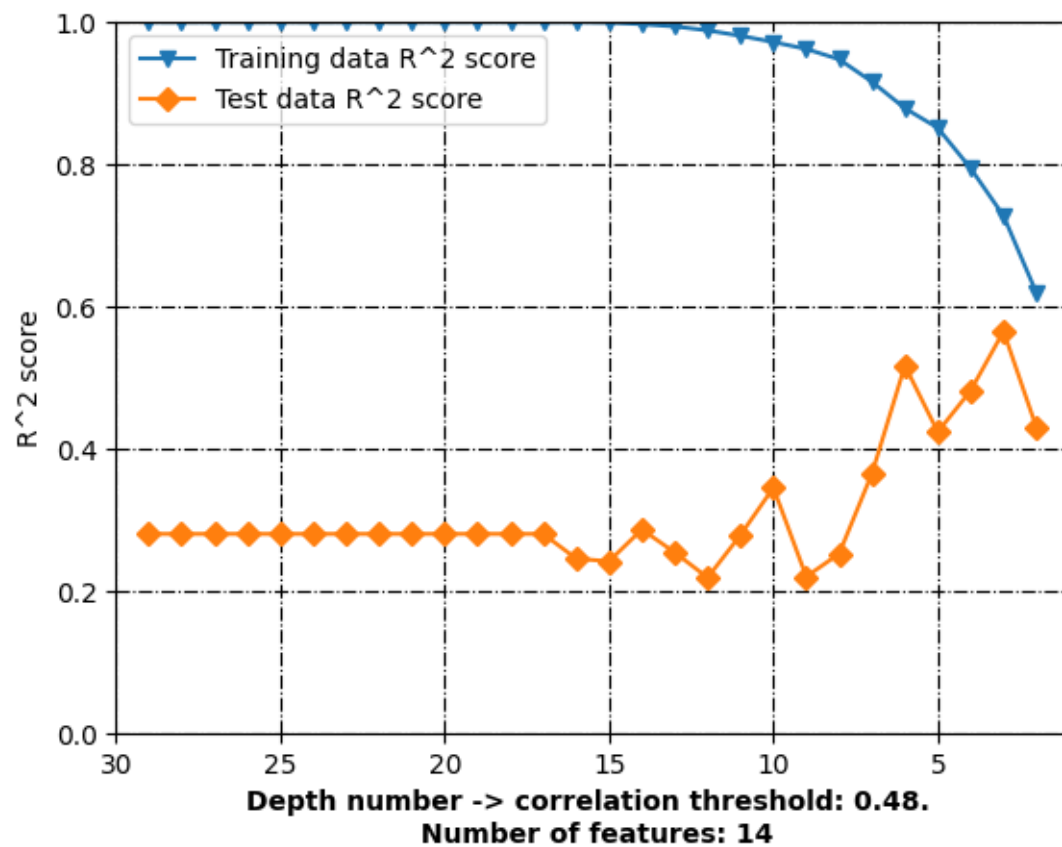

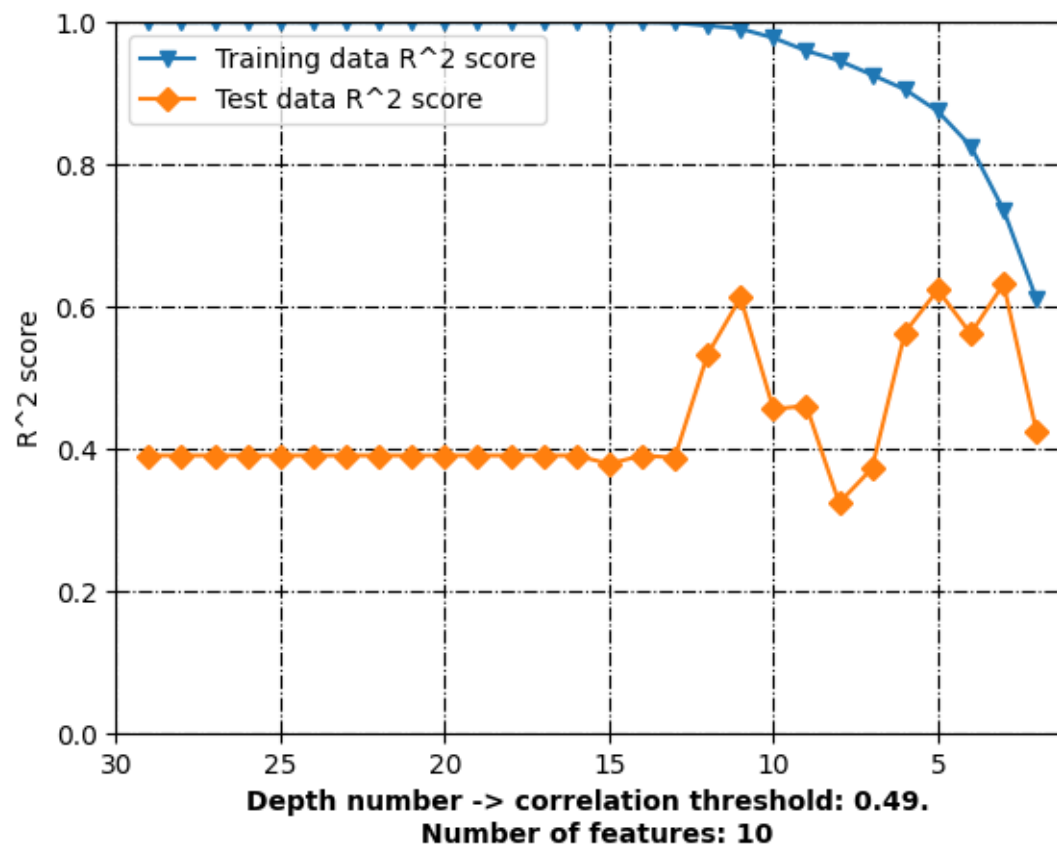

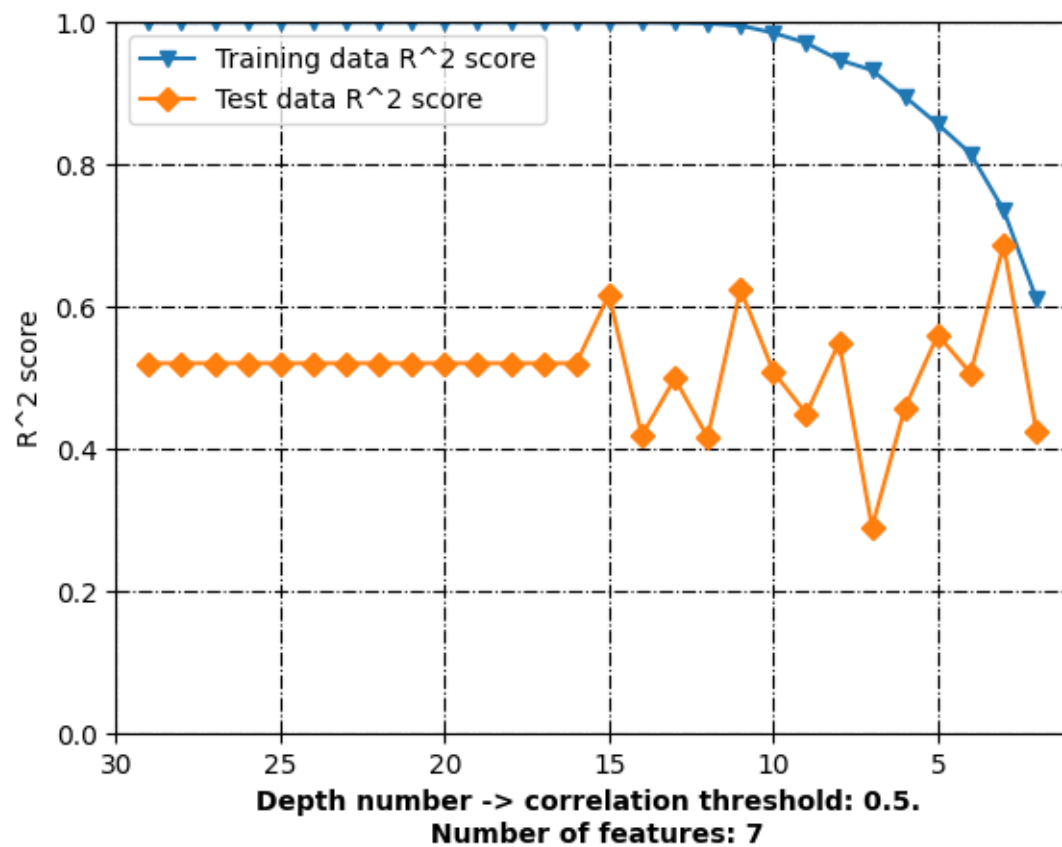



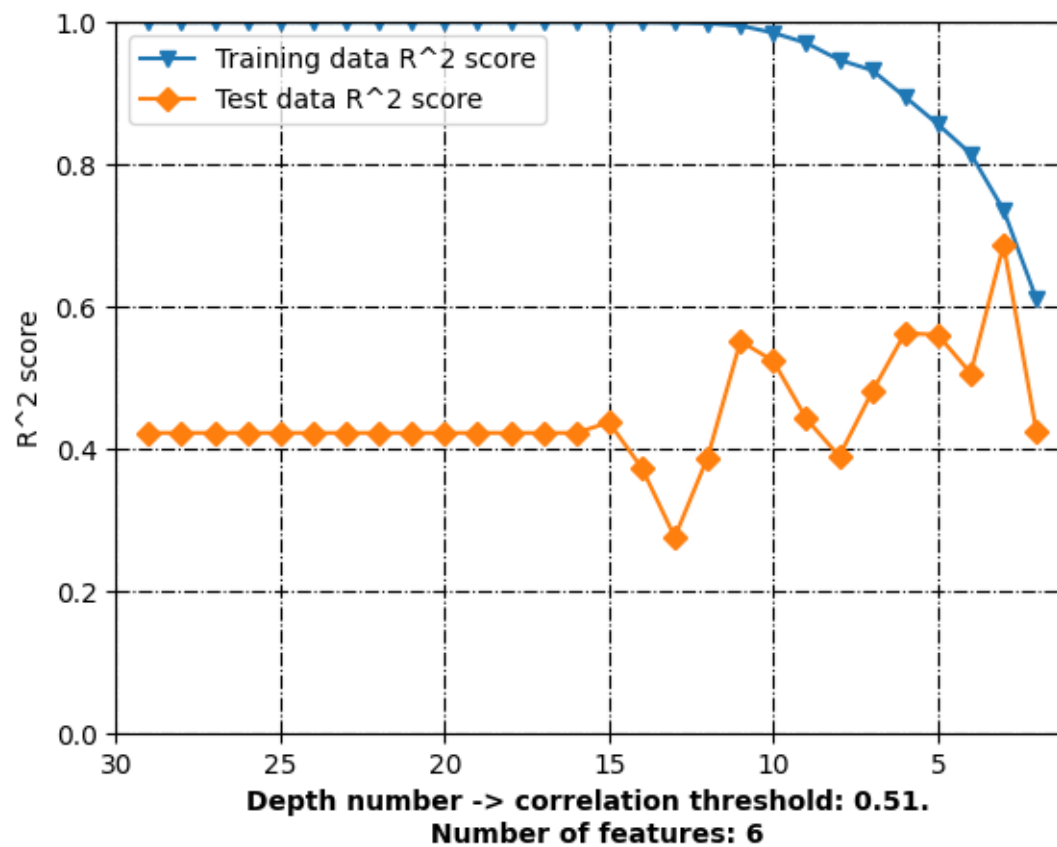

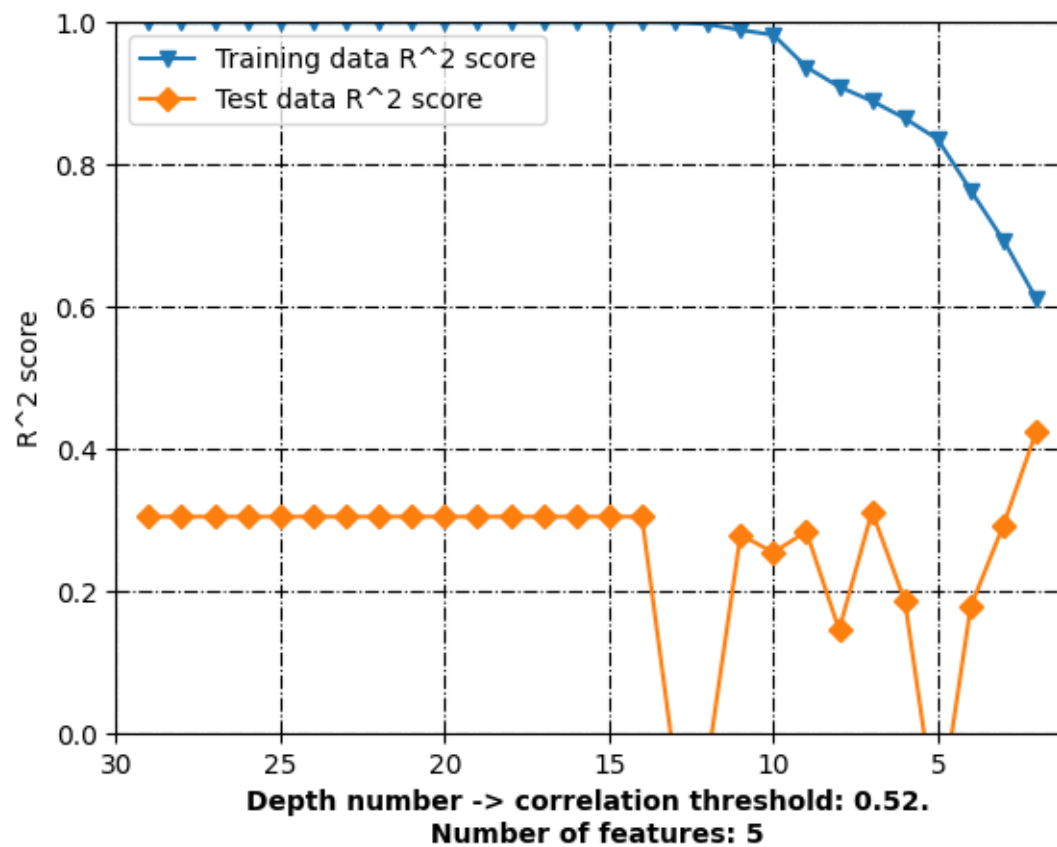

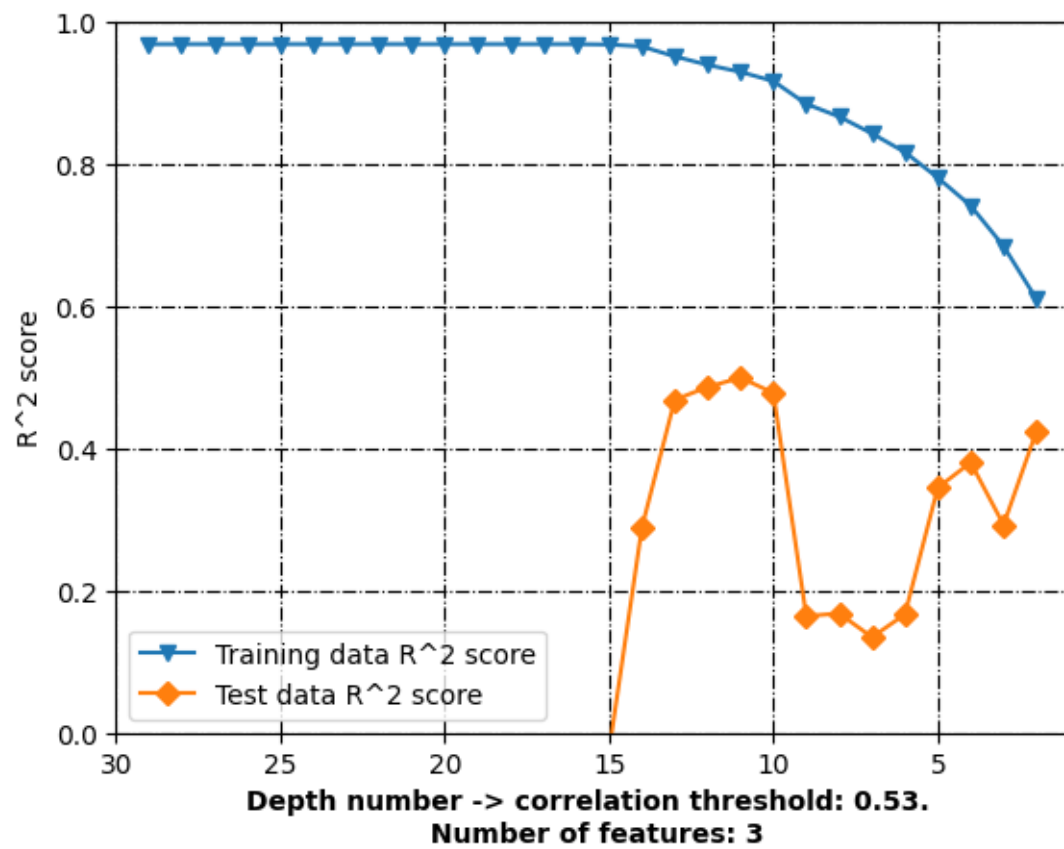

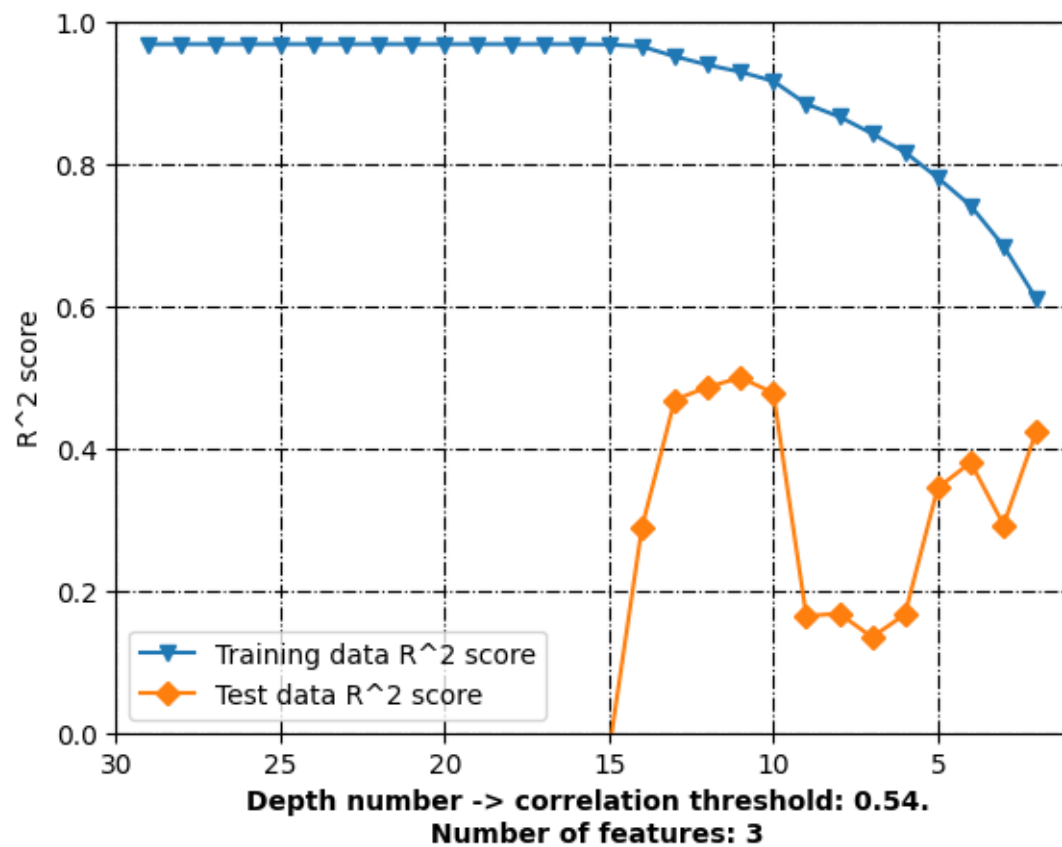

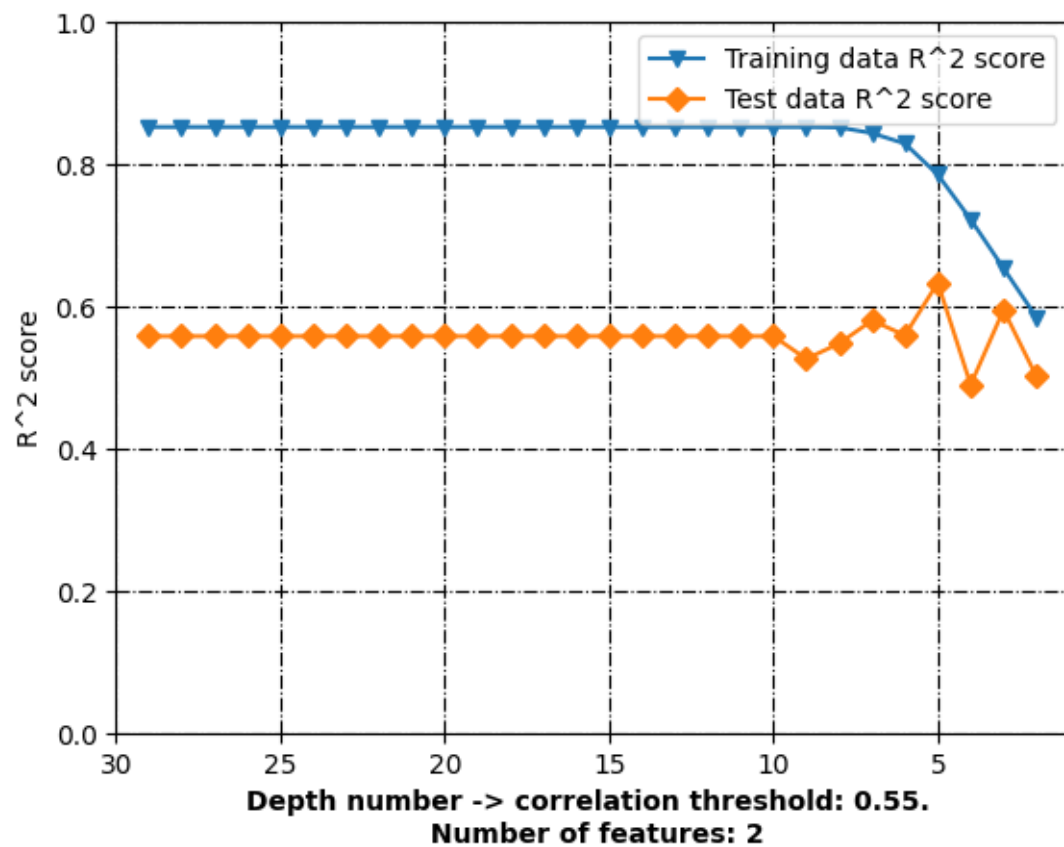

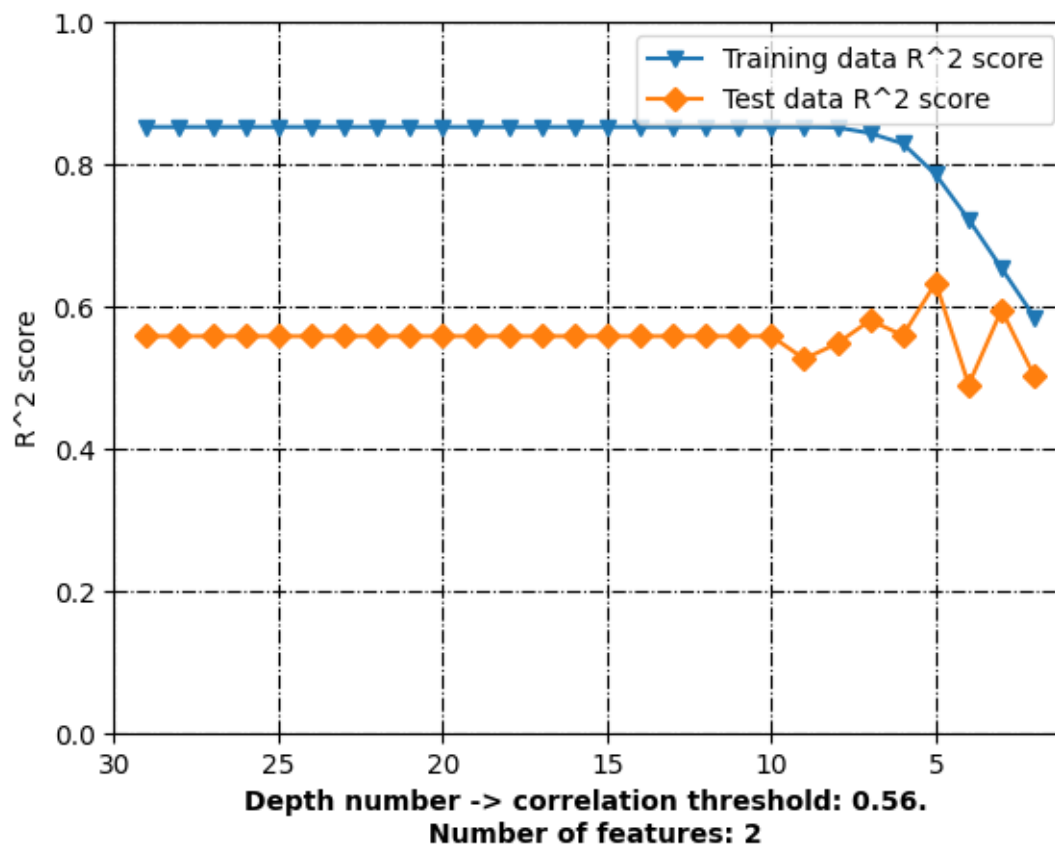

```
[20]: plt.plot(df_without_standardization['Correlation threshold'],  
             df_without_standardization['Number of features'], label = "Number of  
             features", marker='.')  
plt.legend()  
plt.xlabel('Correlation threshold')  
plt.ylabel('Number of features')  
plt.show()
```

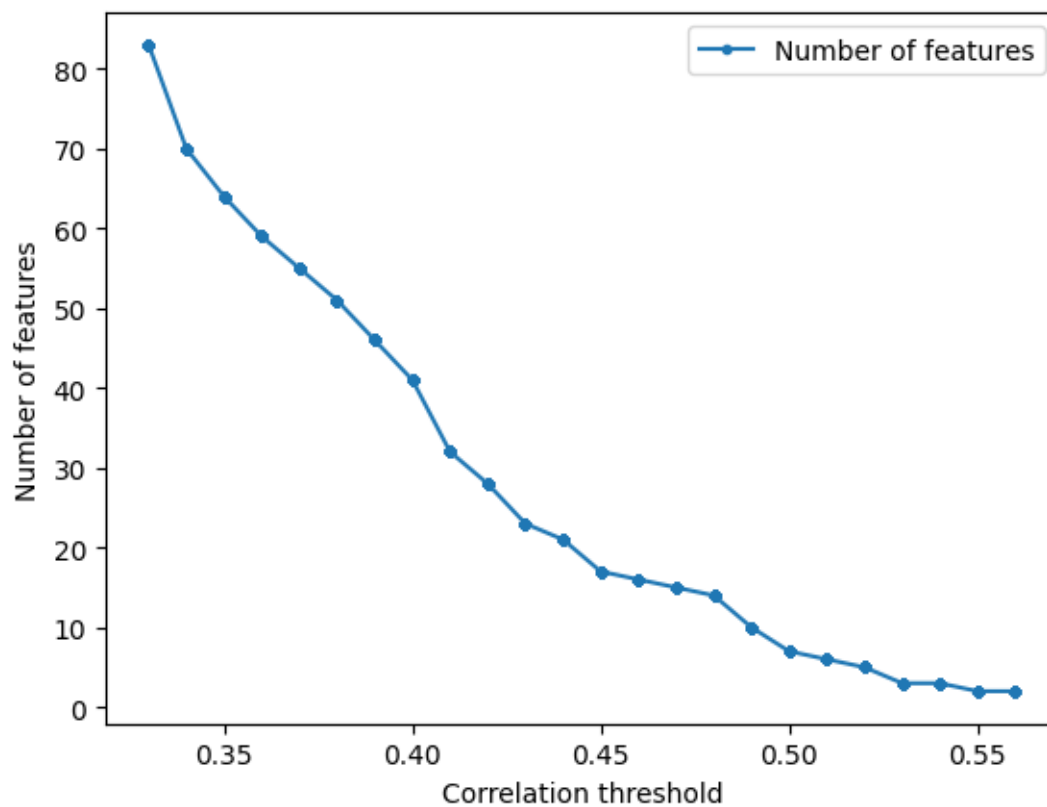

[ ]:

### 3 Random Forest

```
[21]: without_standardization, train_r2_, test_r2_, hist1, hist2, target_column_name,
      ↪ training_data_RMSE, test_data_RMSE = pred_model.
      ↪ prepare_data_and_create_model(molecular_descriptors_df=data,
      ↪
      ↪         correlation_threshold=0.50,
      ↪
      ↪         standardization=False,
      ↪
      ↪         model_type='RandomForestRegressor',
      ↪
      ↪         n_estimators=12,
      ↪
      ↪         target_column_name = target,
      ↪
      ↪         random_state=random_state,
```

```

↪          train_test_split_=True,
↪          verbose=True)

```

I am not doing standardization...

|     | molecular descriptor name |            |                            |
|-----|---------------------------|------------|----------------------------|
| 0   | AATSOZ                    |            |                            |
| 1   | AATSOare                  |            |                            |
| 2   | AATSOd                    |            |                            |
| 3   | AATSOdv                   |            |                            |
| 4   | AATSOi                    |            |                            |
|     | molecular descriptor name | corr_value |                            |
| 0   | AATSOZ                    | -0.020817  |                            |
| 1   | AATSOare                  | -0.148257  |                            |
| 2   | AATSOd                    | 0.022999   |                            |
| 3   | AATSOdv                   | -0.137980  |                            |
| 4   | AATSOi                    | 0.133257   |                            |
|     | molecular descriptor name | corr_value | absolute correlation value |
| 0   | AATSOZ                    | -0.020817  | 0.020817                   |
| 1   | AATSOare                  | -0.148257  | 0.148257                   |
| 2   | AATSOd                    | 0.022999   | 0.022999                   |
| 3   | AATSOdv                   | -0.137980  | 0.137980                   |
| 4   | AATSOi                    | 0.133257   | 0.133257                   |
|     | molecular descriptor name | corr_value | absolute correlation value |
| 226 | AMID_0                    | -0.546843  | 0.546843                   |
| 505 | EState_VSA5               | -0.588780  | 0.588780                   |
| 556 | GATS2c                    | 0.511671   | 0.511671                   |
| 791 | MDEO-12                   | -0.582747  | 0.582747                   |
| 847 | NdO                       | -0.500462  | 0.500462                   |
|     | molecular descriptor name | corr_value | absolute correlation value |
| 226 | AMID_0                    | -0.546843  | 0.546843                   |
| 505 | EState_VSA5               | -0.588780  | 0.588780                   |
| 556 | GATS2c                    | 0.511671   | 0.511671                   |
| 791 | MDEO-12                   | -0.582747  | 0.582747                   |
| 847 | NdO                       | -0.500462  | 0.500462                   |

The model used is: RandomForest...

Return the coefficient of determination of the prediction:

0.7170418032396348

R<sup>2</sup> score: 0.9372587990141408

Correlation coefficient: 0.9681212728858616

Test data - unseen during training:

R<sup>2</sup> score: 0.7170418032396348

Correlation coefficient: 0.8467832091153171

[7.35211449 7.79122224 7.31824059 7.30021685 5.09868769 7.79530921  
 7.45920973 7.63990371 7.92712578 7.62111312 7.12849658 7.43535266  
 7.81811597 6.23860215 7.51009407 7.34459977 7.95622284 7.90608919]

44 8.004365



```
47      7.886057
4       7.002614
55      7.698970
26      5.070734
64      8.060481
73      7.130768
10      8.008774
40      7.795880
107     8.086186
18      6.924818
62      8.173925
11      7.962574
36      6.346787
89      8.102373
91      8.346787
109     7.886057
0       7.991400
```

Name: BALB/3T3, dtype: float64

Training Root Mean Square Error: 0.2206837465243046

Testing Root Mean Square Error: 0.4235121142472992

```
[22]: print(target_column_name+str('_transformed'))
      print(hist1[target_column_name].hist())
```

BALB/3T3\_transformed

AxesSubplot(0.125,0.11;0.775x0.77)



```
[23]: with_standardization, train_r2_, test_r2_, hist1, hist2, target_column_name,
      ↪ training_data_RMSE, test_data_RMSE = pred_model.
      ↪ prepare_data_and_create_model(molecular_descriptors_df=data,
      ↪
      ↪         correlation_threshold=0.50,
      ↪
      ↪         standardization=True,
      ↪
      ↪         model_type='RandomForestRegressor',
      ↪
      ↪         n_estimators=12,
      ↪
      ↪         target_column_name = target,
      ↪
      ↪         random_state=random_state,
      ↪
      ↪         train_test_split=True,
      ↪
      ↪         verbose=True)
```

I am doing standardization...  
molecular descriptor name

|     |                           |            |                            |
|-----|---------------------------|------------|----------------------------|
| 0   | AATSOZ                    |            |                            |
| 1   | AATSOare                  |            |                            |
| 2   | AATSOd                    |            |                            |
| 3   | AATSOdv                   |            |                            |
| 4   | AATSOi                    |            |                            |
|     | molecular descriptor name | corr_value |                            |
| 0   | AATSOZ                    | -0.020817  |                            |
| 1   | AATSOare                  | -0.148257  |                            |
| 2   | AATSOd                    | 0.022999   |                            |
| 3   | AATSOdv                   | -0.137980  |                            |
| 4   | AATSOi                    | 0.133257   |                            |
|     | molecular descriptor name | corr_value | absolute correlation value |
| 0   | AATSOZ                    | -0.020817  | 0.020817                   |
| 1   | AATSOare                  | -0.148257  | 0.148257                   |
| 2   | AATSOd                    | 0.022999   | 0.022999                   |
| 3   | AATSOdv                   | -0.137980  | 0.137980                   |
| 4   | AATSOi                    | 0.133257   | 0.133257                   |
|     | molecular descriptor name | corr_value | absolute correlation value |
| 226 | AMID_0                    | -0.546843  | 0.546843                   |
| 505 | EState_VSA5               | -0.588780  | 0.588780                   |
| 556 | GATS2c                    | 0.511671   | 0.511671                   |
| 791 | MDEO-12                   | -0.582747  | 0.582747                   |
| 847 | NdO                       | -0.500462  | 0.500462                   |
|     | molecular descriptor name | corr_value | absolute correlation value |
| 226 | AMID_0                    | -0.546843  | 0.546843                   |
| 505 | EState_VSA5               | -0.588780  | 0.588780                   |
| 556 | GATS2c                    | 0.511671   | 0.511671                   |
| 791 | MDEO-12                   | -0.582747  | 0.582747                   |
| 847 | NdO                       | -0.500462  | 0.500462                   |

The model used is: RandomForest...

Return the coefficient of determination of the prediction:  
0.7170418032396348

R<sup>2</sup> score: 0.9372587990141408

Correlation coefficient: 0.9681212728858616

Test data - unseen during training:  
R<sup>2</sup> score: 0.7170418032396348

Correlation coefficient: 0.8467832091153171

[7.35211449 7.79122224 7.31824059 7.30021685 5.09868769 7.79530921  
7.45920973 7.63990371 7.92712578 7.62111312 7.12849658 7.43535266  
7.81811597 6.23860215 7.51009407 7.34459977 7.95622284 7.90608919]

|    |          |
|----|----------|
| 44 | 8.004365 |
| 47 | 7.886057 |
| 4  | 7.002614 |
| 55 | 7.698970 |
| 26 | 5.070734 |
| 64 | 8.060481 |
| 73 | 7.130768 |
| 10 | 8.008774 |

```

40      7.795880
107     8.086186
18      6.924818
62      8.173925
11      7.962574
36      6.346787
89      8.102373
91      8.346787
109     7.886057
0       7.991400

```

Name: BALB/3T3, dtype: float64

Training Root Mean Square Error: 0.2206837465243046

Testing Root Mean Square Error: 0.4235121142472992

### 3.1 Search inside correlation space

```

[24]: step = 0.01
initial_step = corr_low
last_step = corr_high
first_list = [x / 100.0 for x in range(int(initial_step*100),
    ↪ int(last_step*100), int(step*100))]
n_estimators = [range(2,21,1)]
corr_th = []
second_list = []
third_list = []
fourth_l = []
fifth_l = []
f_list = []
fif_list = []
for i in first_list:

    for estimator in n_estimators[0]:

        without_standardization, train_r2, test_r2, _, h_, target_column_name,
    ↪ training_data_RMSE, test_data_RMSE = pred_model.
    ↪ prepare_data_and_create_model(molecular_descriptors_df=data,

    ↪                                     correlation_threshold=i,

    ↪                                     standardization=False,

    ↪                                     model_type='RandomForestRegressor',

    ↪                                     n_estimators_=estimator,

    ↪                                     target_column_name = target,

```

```

        random_state=random_state,

        train_test_split_=True,

        verbose=False)
    corr_th.append(i)
    second_list.append(train_r2)
    third_list.append(test_r2)
    fourth_l.append(training_data_RMSE)
    fifth_l.append(test_data_RMSE)
    f_list.append(len(h_))
    fif_list.append(estimator)

```

```

[25]: df_without_standardization = pd.DataFrame(data=corr_th, columns=["Correlation_
    ↪threshold"])
df_without_standardization['Training data R^2 score'] = second_list
df_without_standardization['Test data R^2 score'] = third_list
df_without_standardization['Training RMSE'] = fourth_l
df_without_standardization['Test RMSE'] = fifth_l
df_without_standardization['Number of features'] = f_list
df_without_standardization['Number of estimators'] = fif_list

```

```

[26]: df_random_forest = df_without_standardization.copy()
#df_without_standardization.to_excel('../Data/
    ↪A549_Random_forest_rs_'+str(random_state)+'_xlsx')

```

```

[27]: corre_list = [x / 100.0 for x in range(int(initial_step*100),
    ↪int(last_step*100), int(0.01*100))]
for element in corre_list:
    element_ =
    ↪df_without_standardization[df_without_standardization['Correlation_
    ↪threshold'] == float(element)]
    plt.plot(element_['Number of estimators'], element_['Training data R^2_
    ↪score'], label = "Training data R^2 score", marker='v')
    plt.plot(element_['Number of estimators'], element_['Test data R^2 score'],
    ↪label = "Test data R^2 score", marker='D')
    plt.legend()
    plt.xlabel('Number of estimators -> correlation threshold: '+str(element)+'.'
    ↪\n Number of features: '+str(element_['Number of features'].iloc[0]))
    plt.xlim(max(element_['Number of estimators'])+1, min(element_['Number of_
    ↪estimators'])-1)
    plt.ylabel('R^2 score')
    plt.ylim([0, 1])
    plt.rc('grid', linestyle="-. ", color='black')
    plt.grid(True)

```

```
plt.show()
```

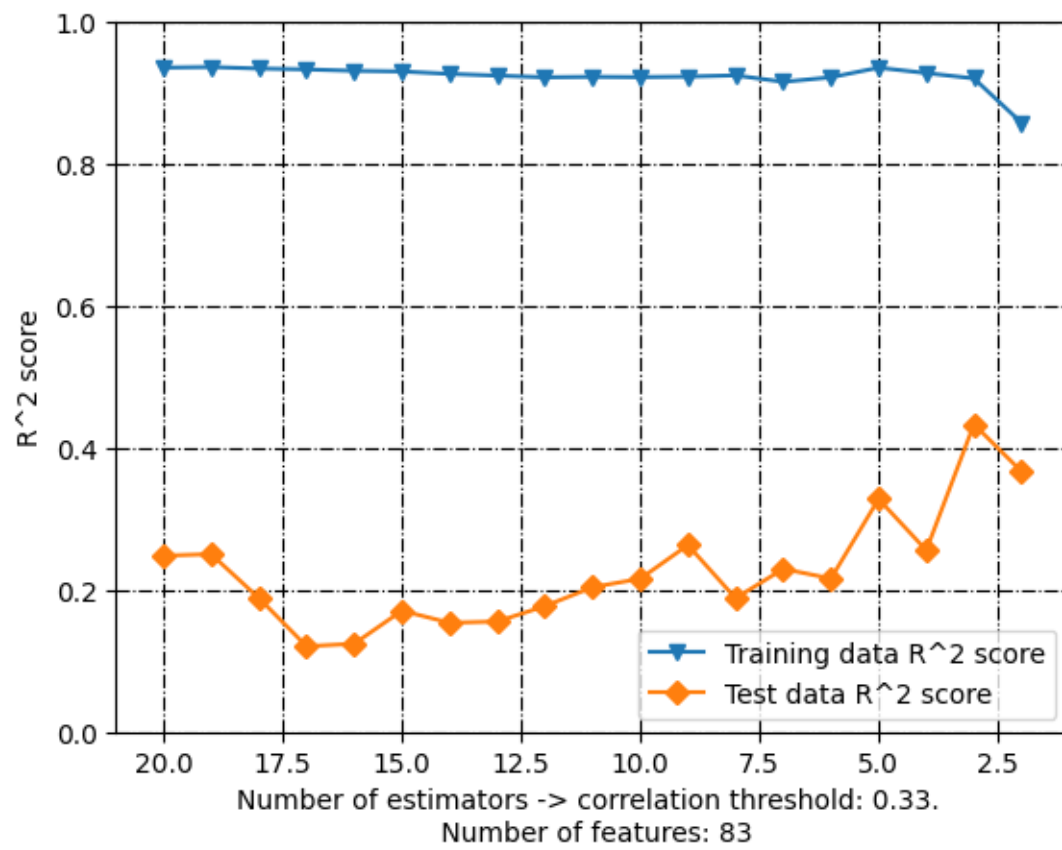

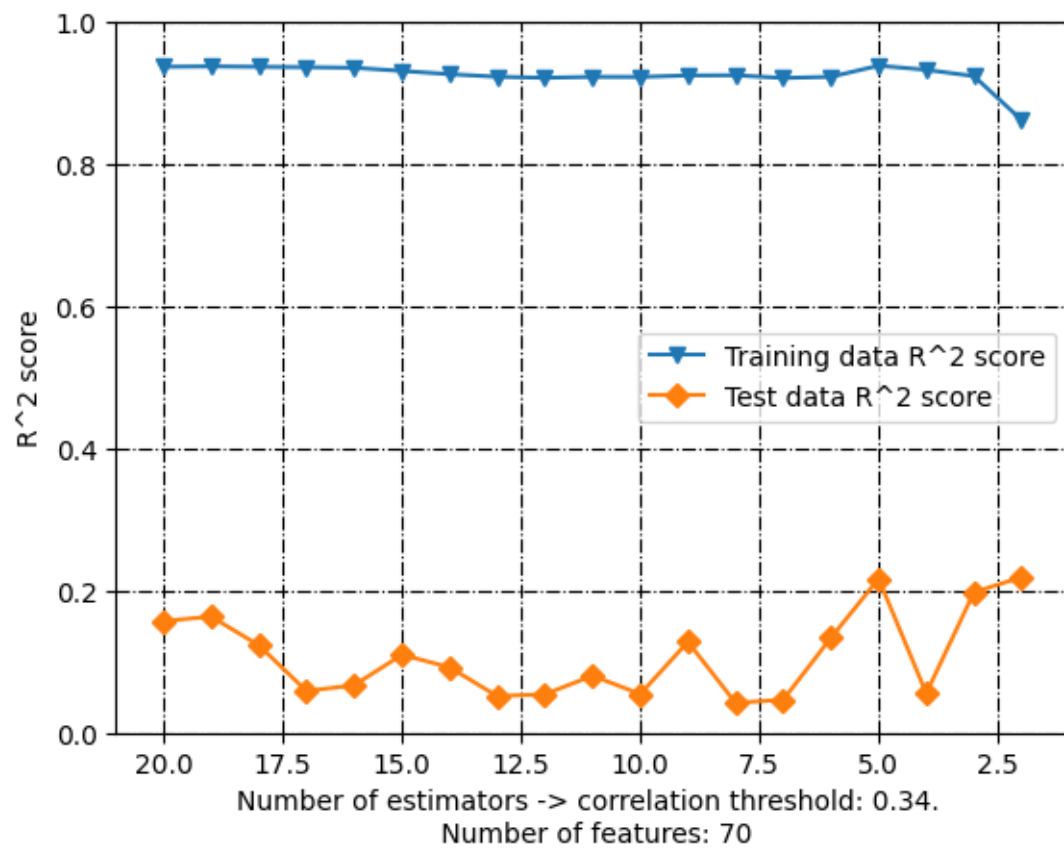

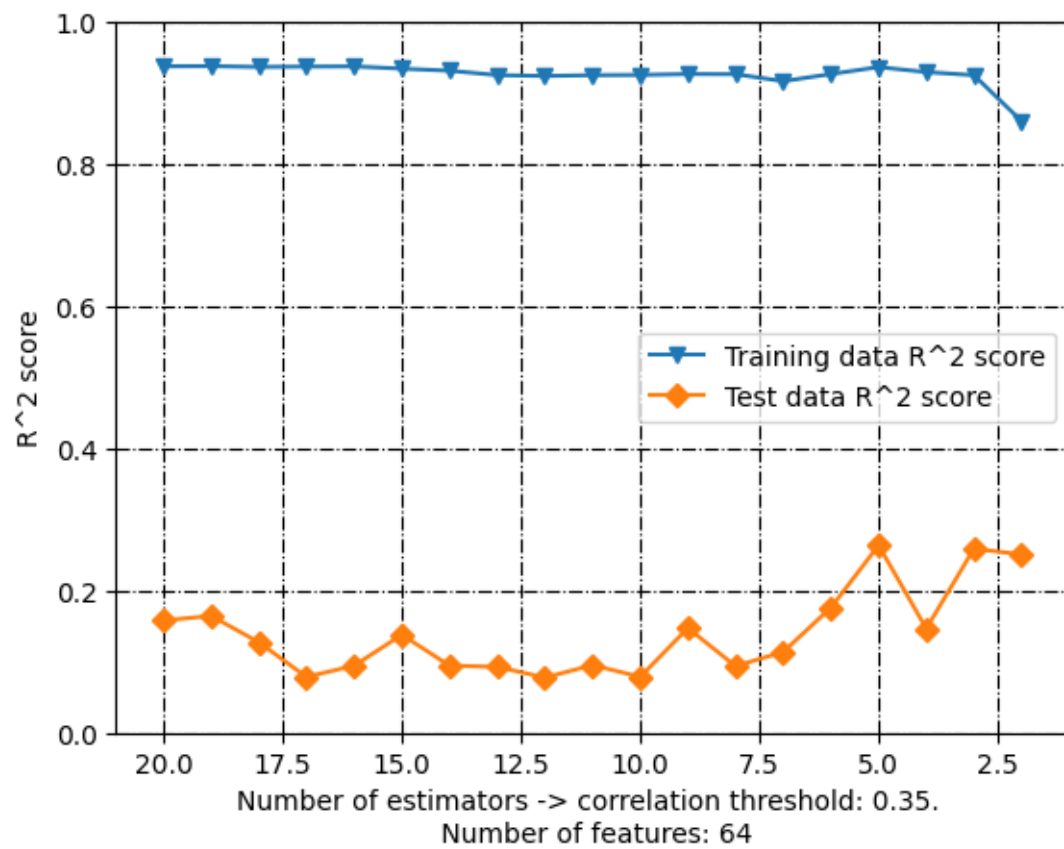



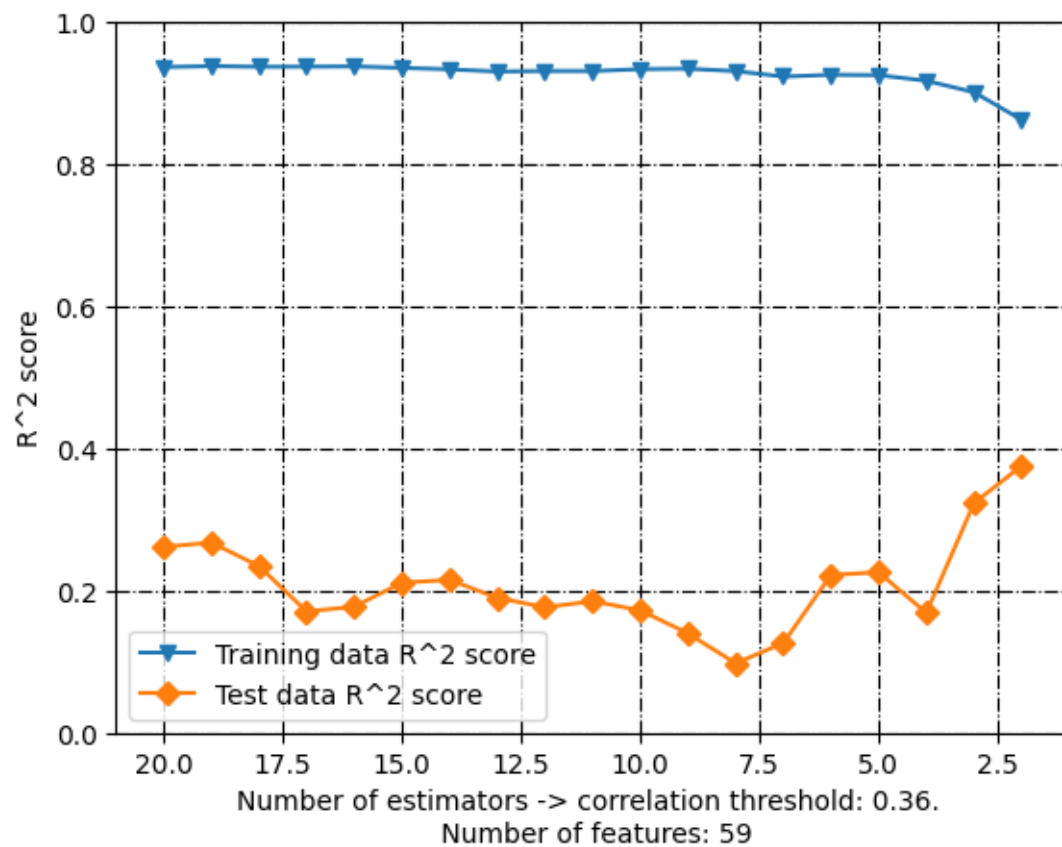

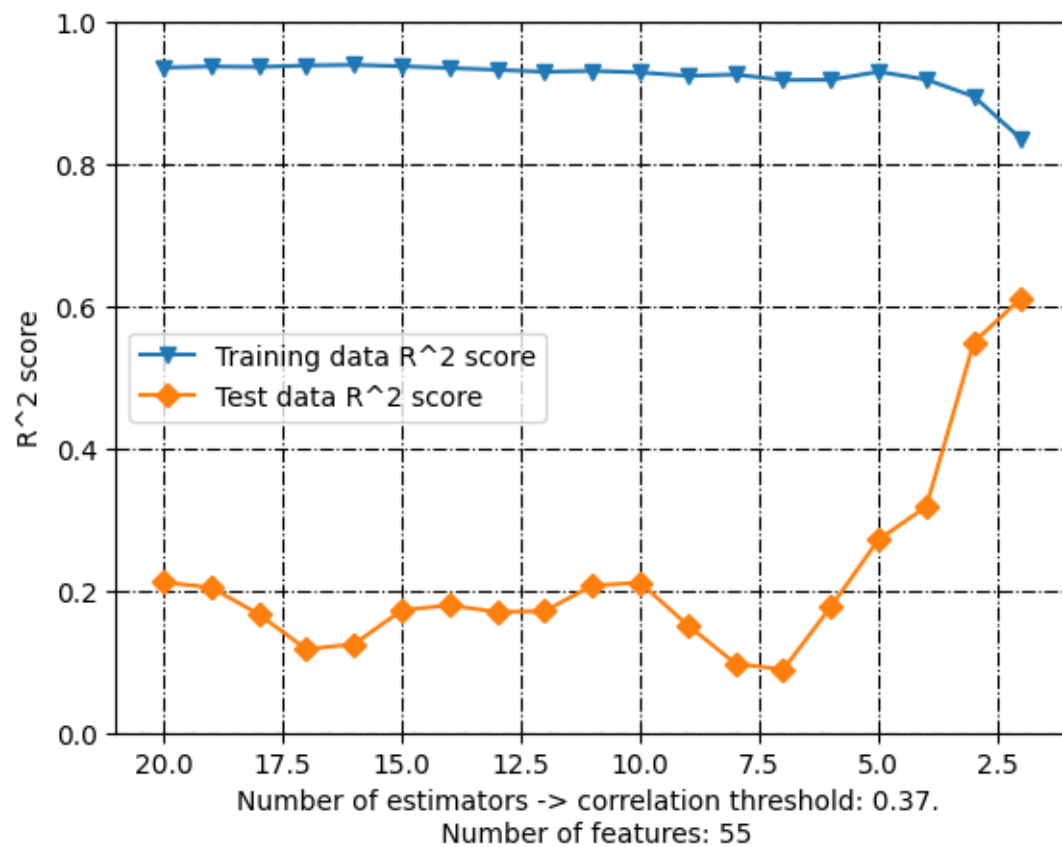

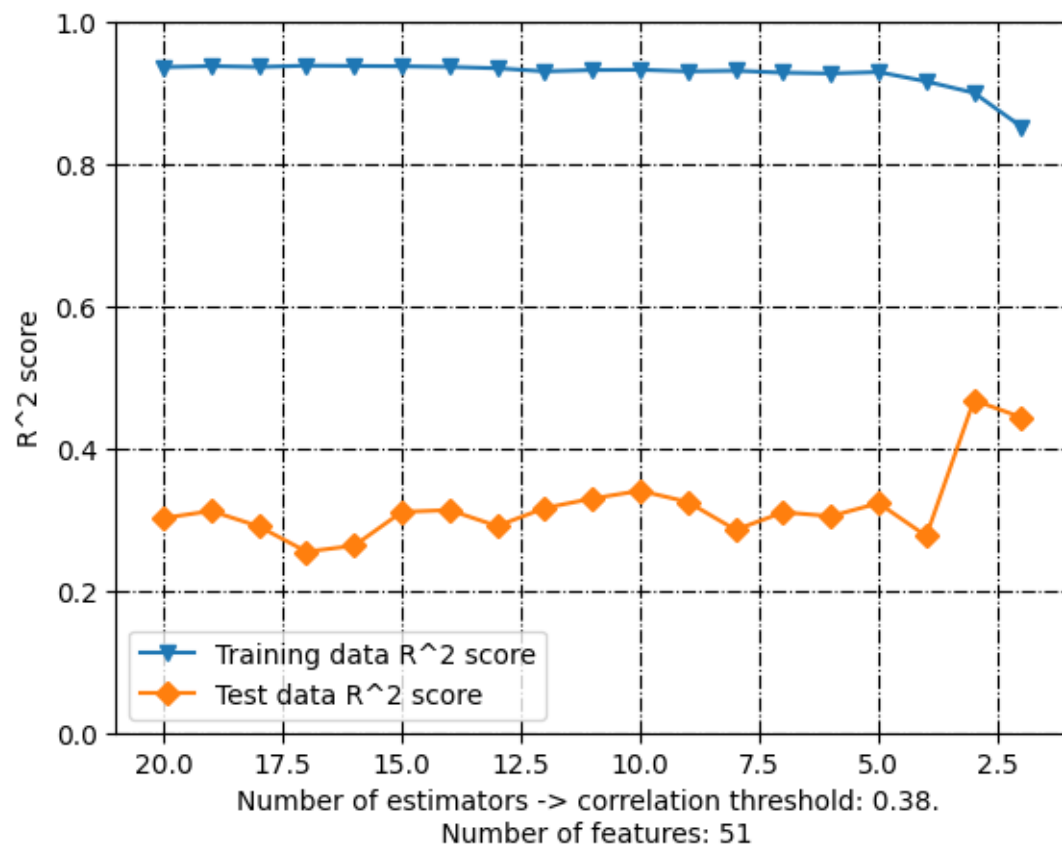

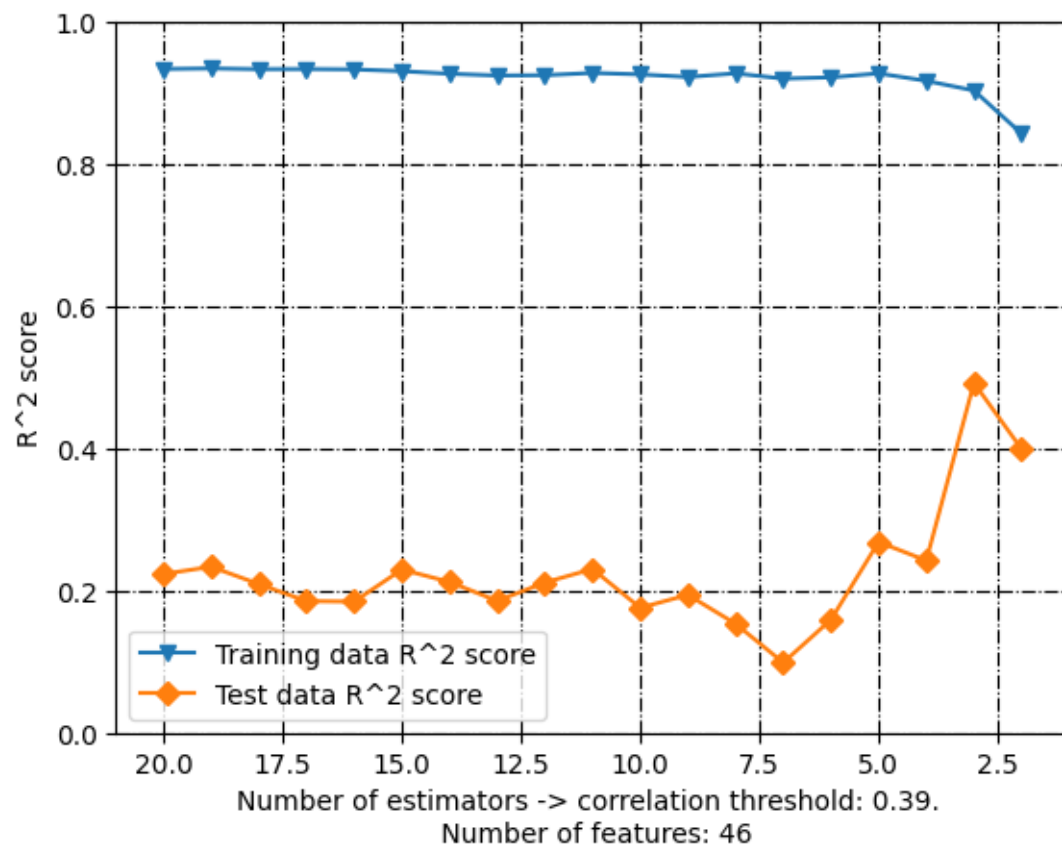

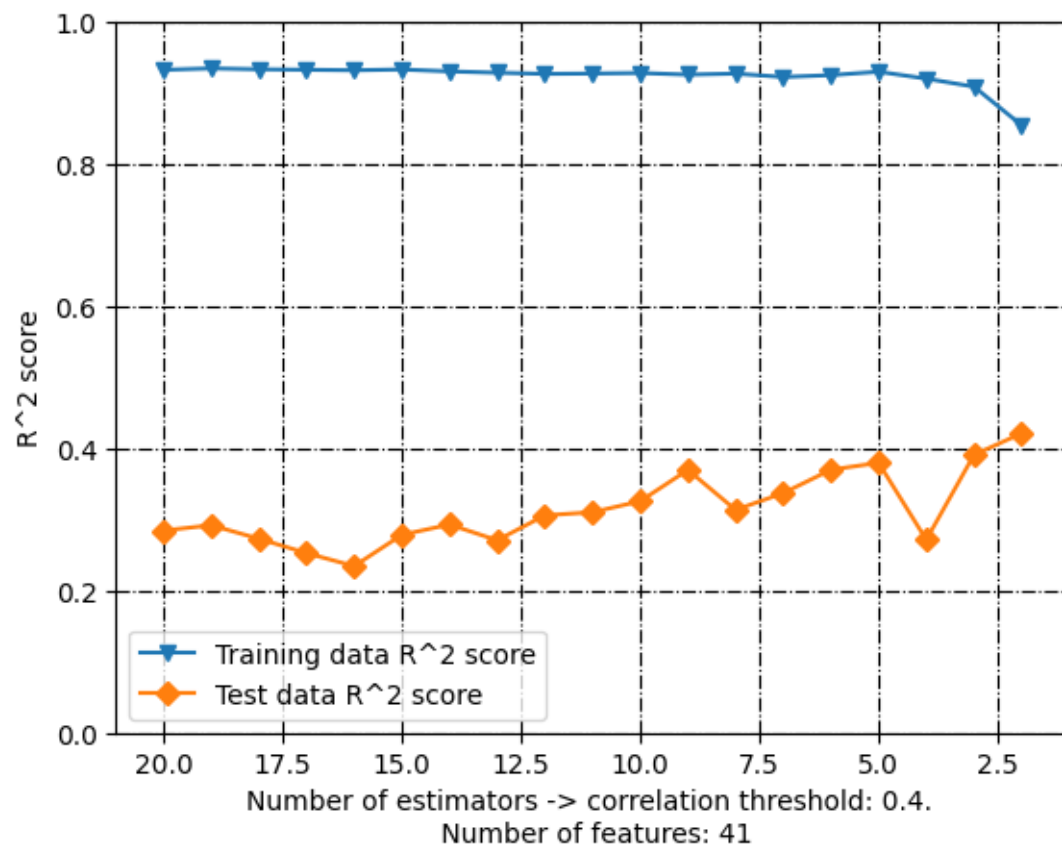

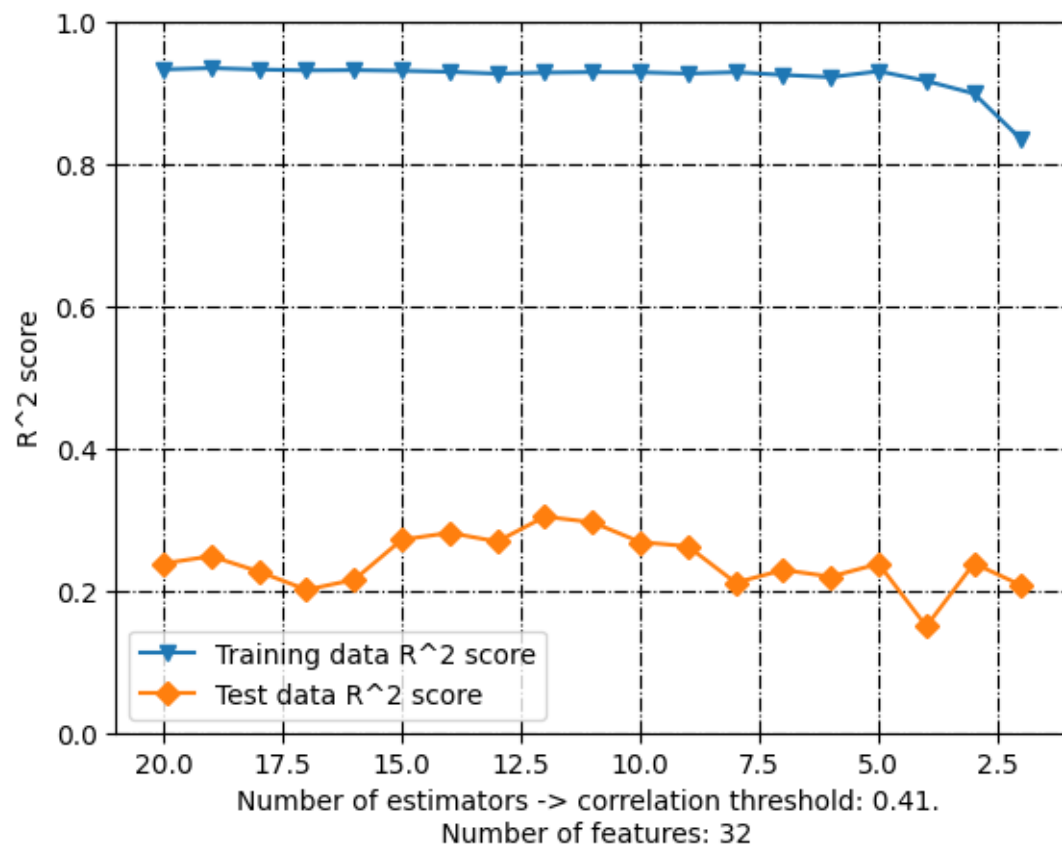

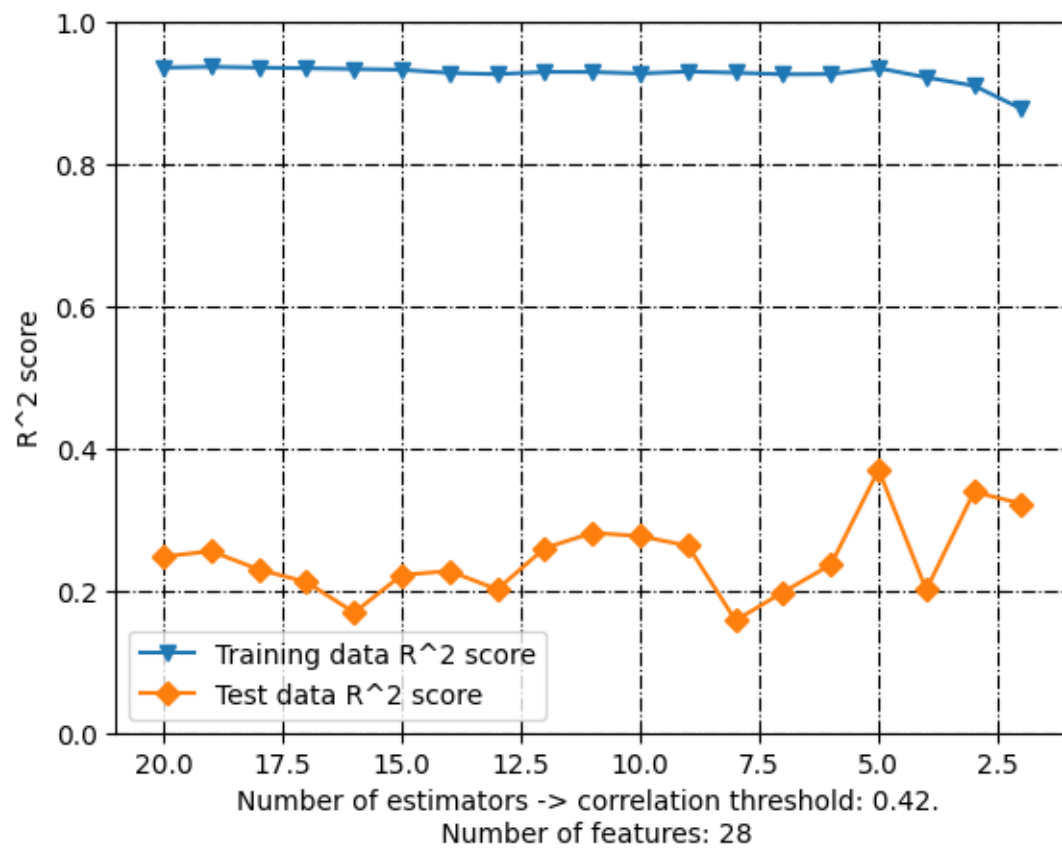

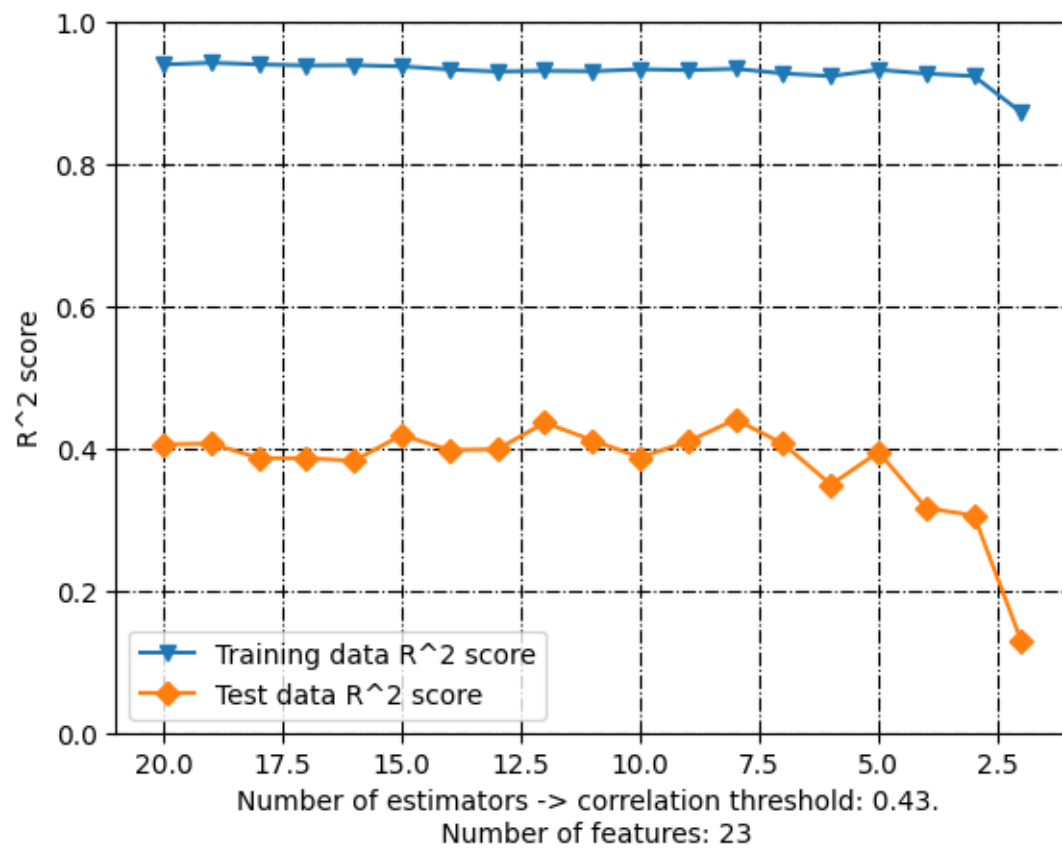



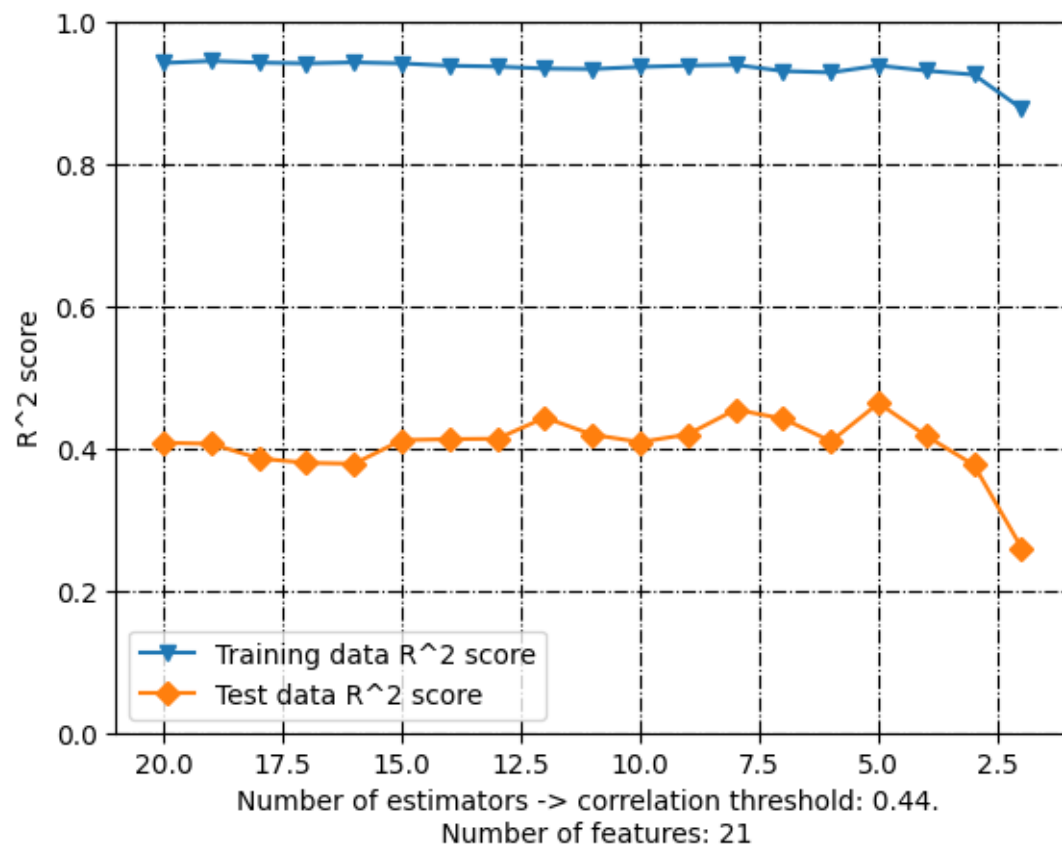

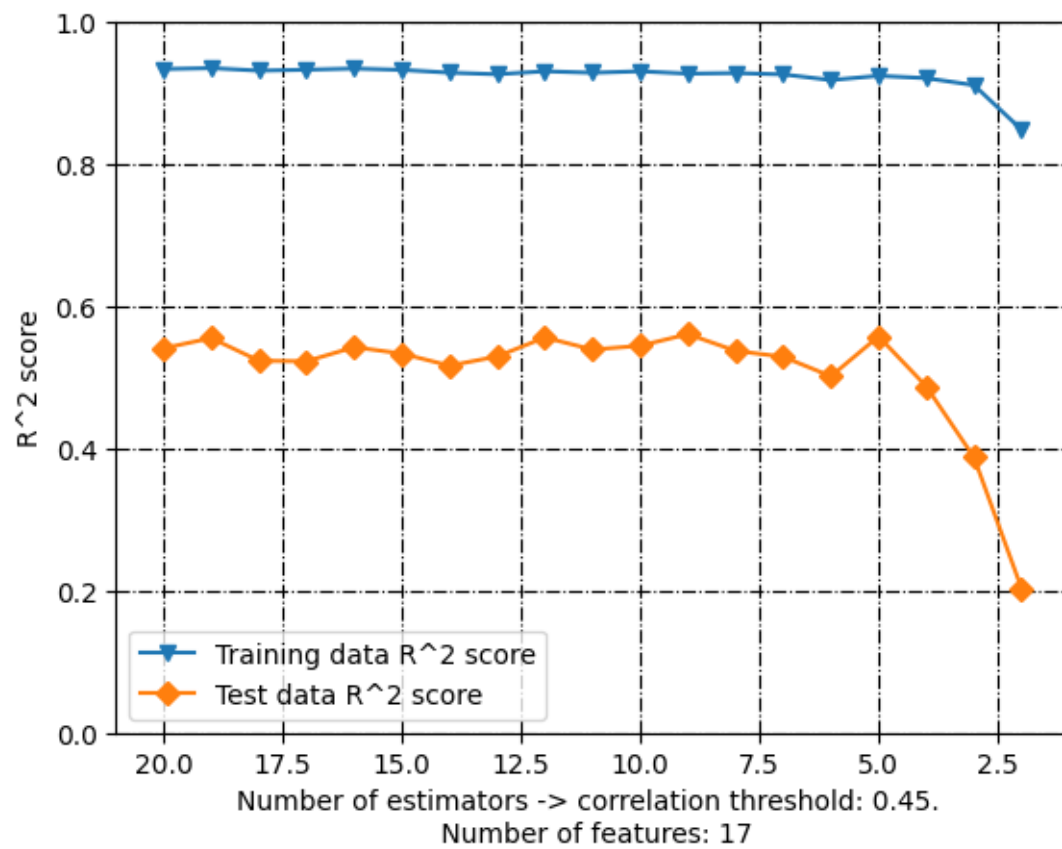

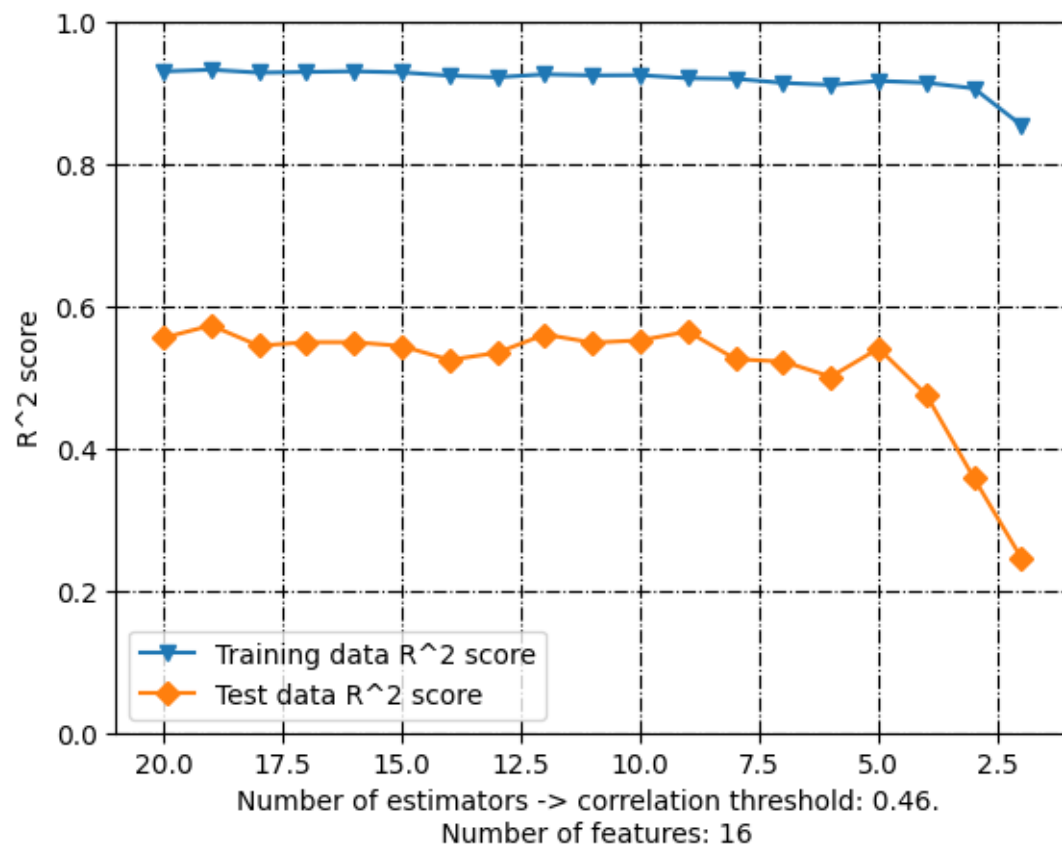

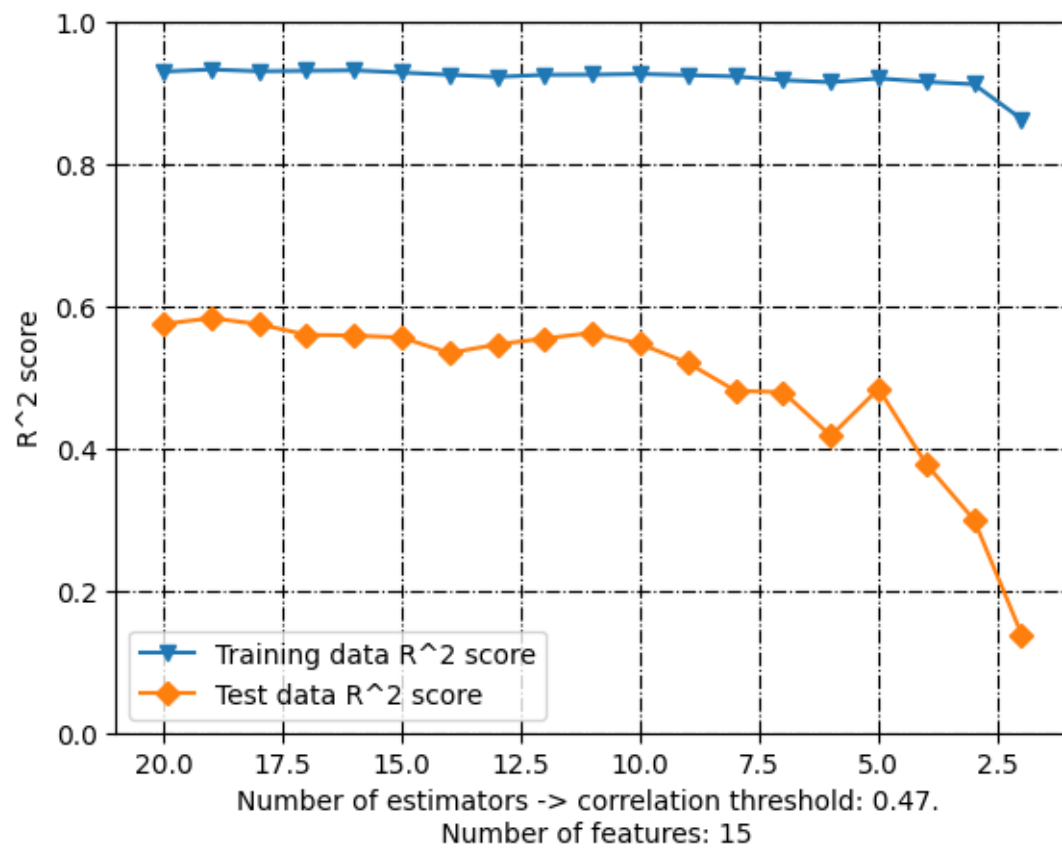

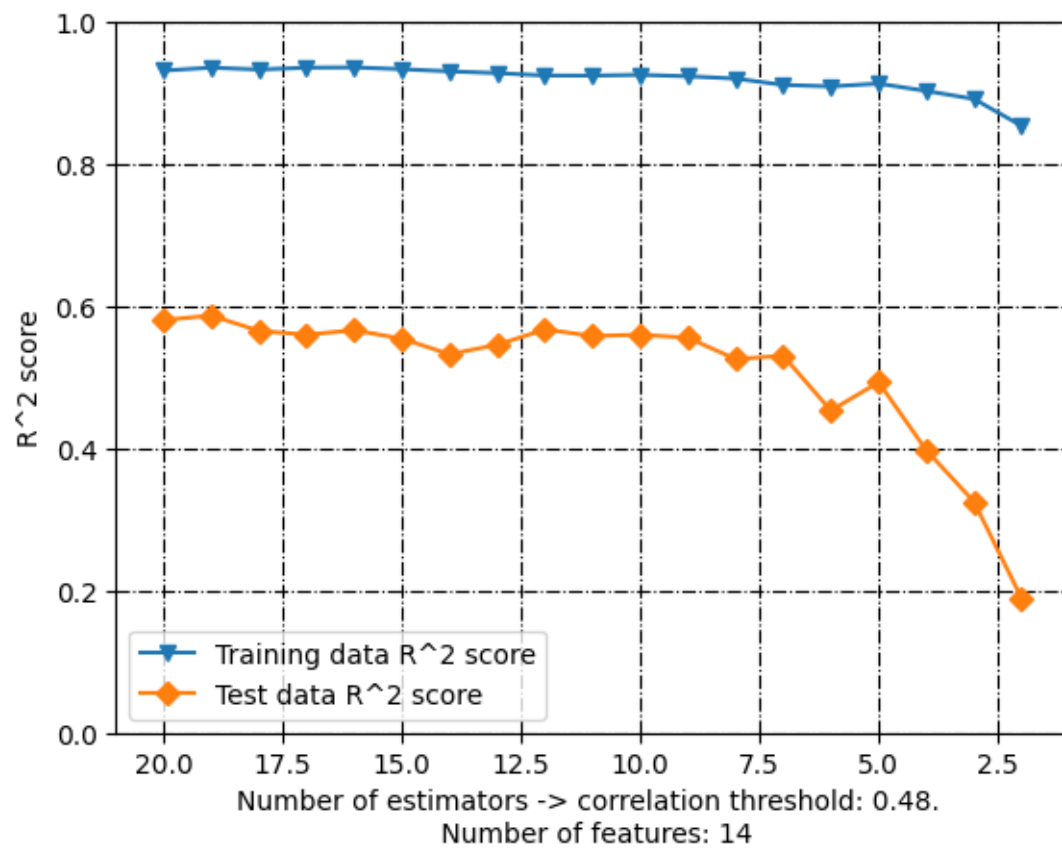

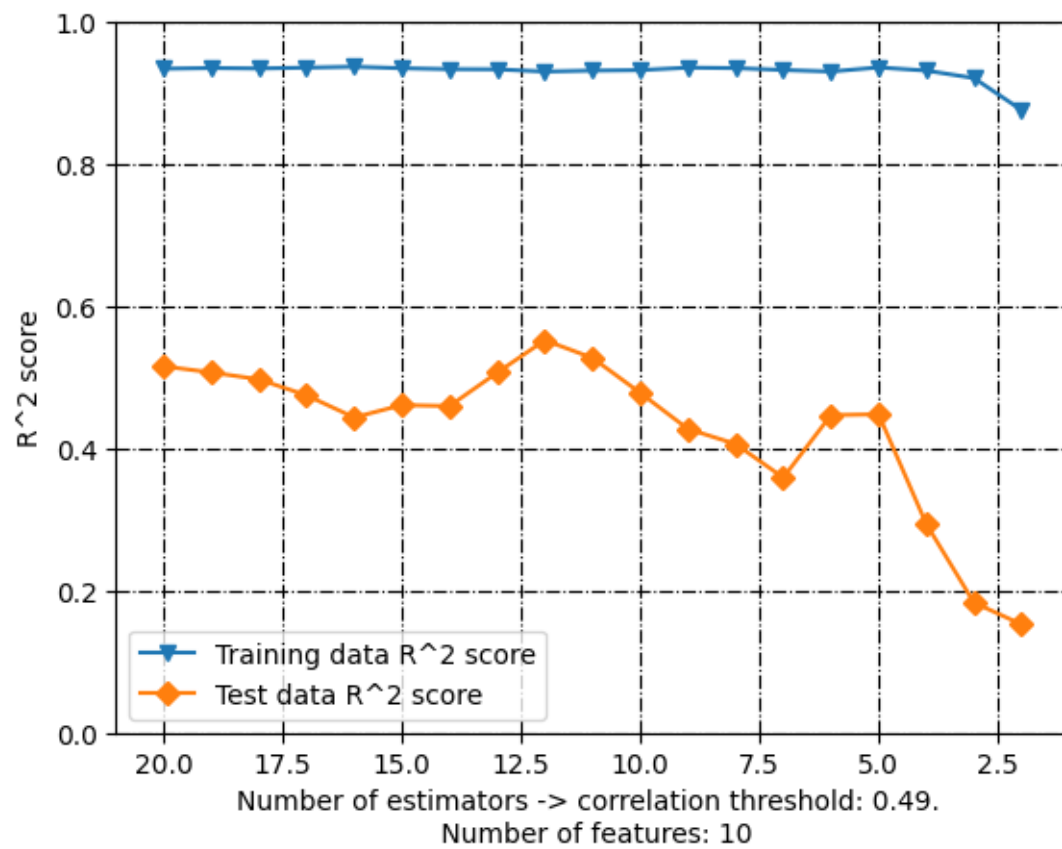

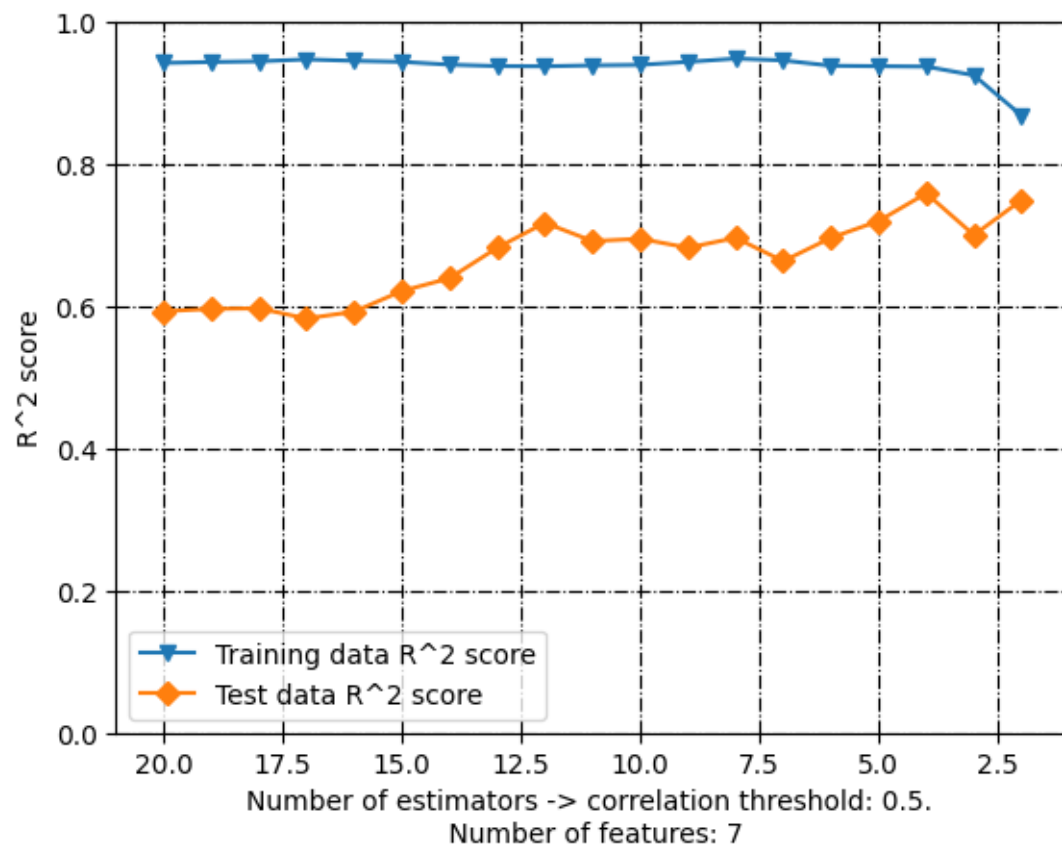

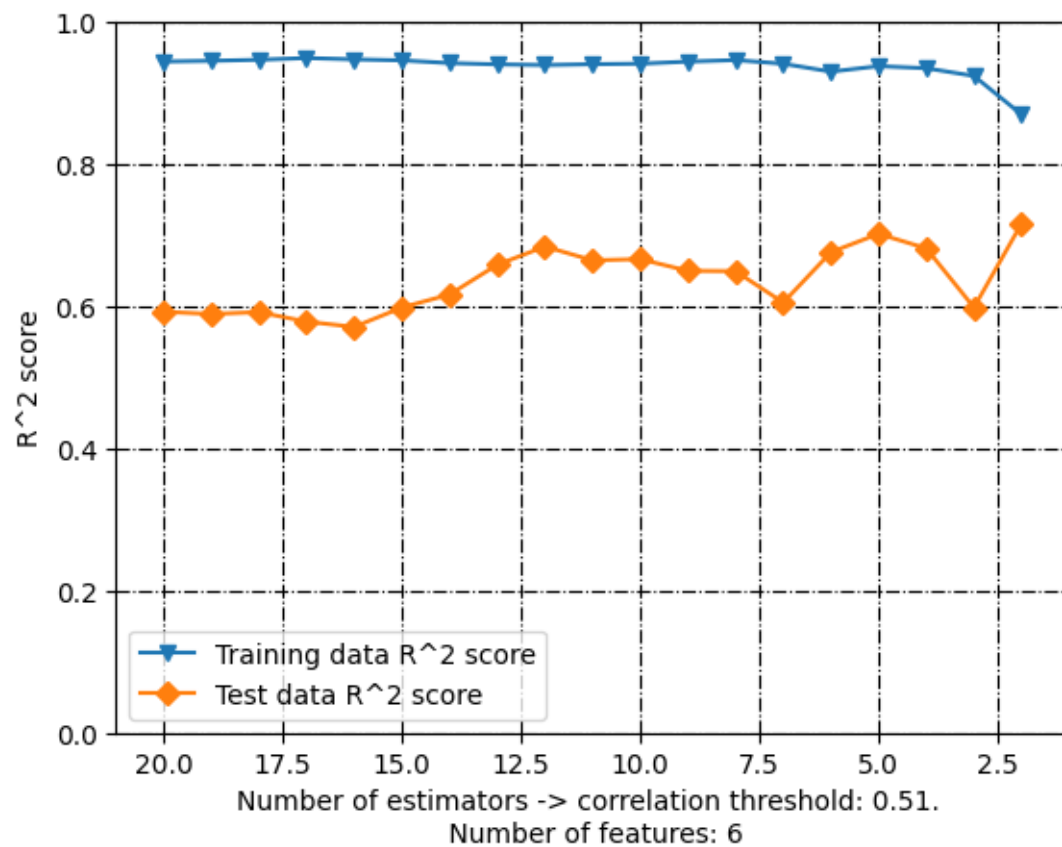



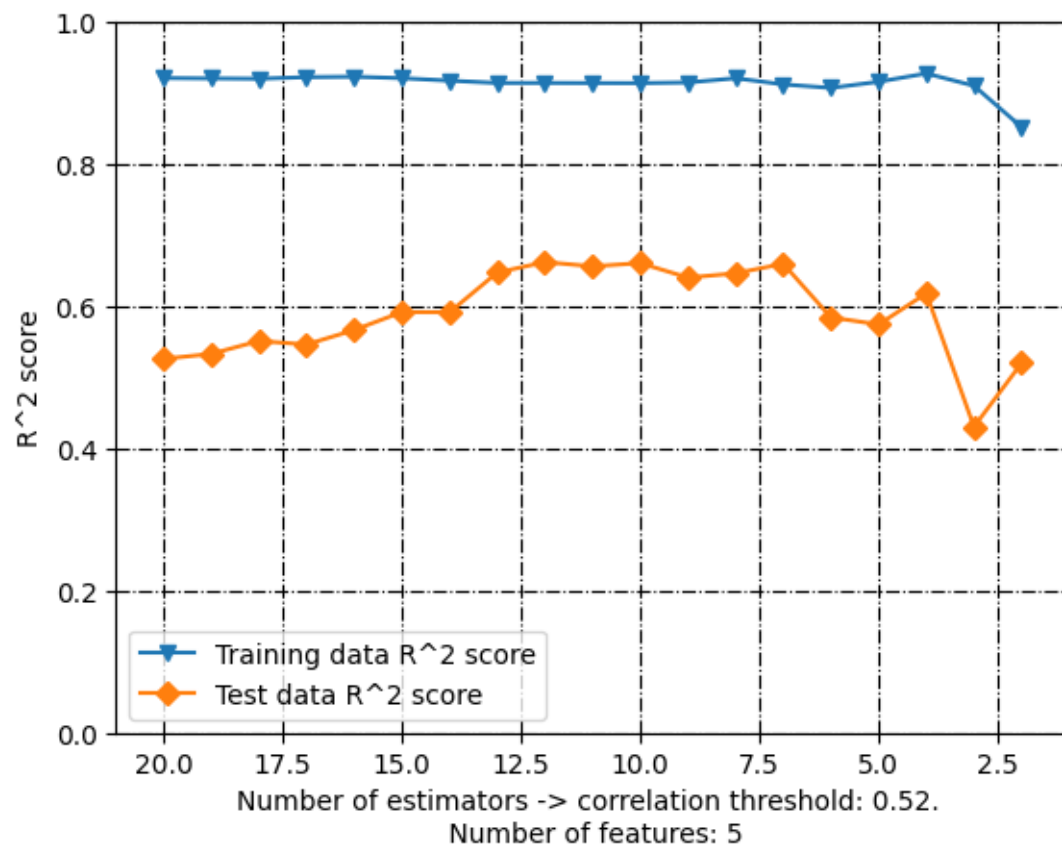

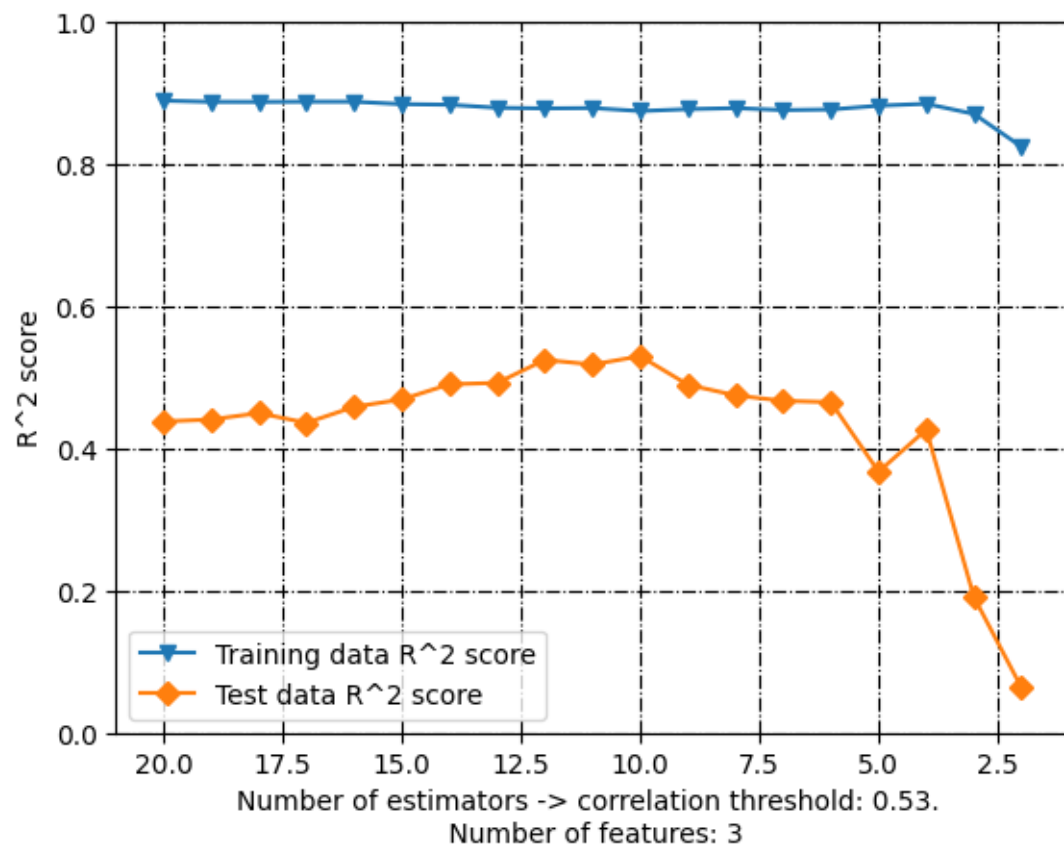

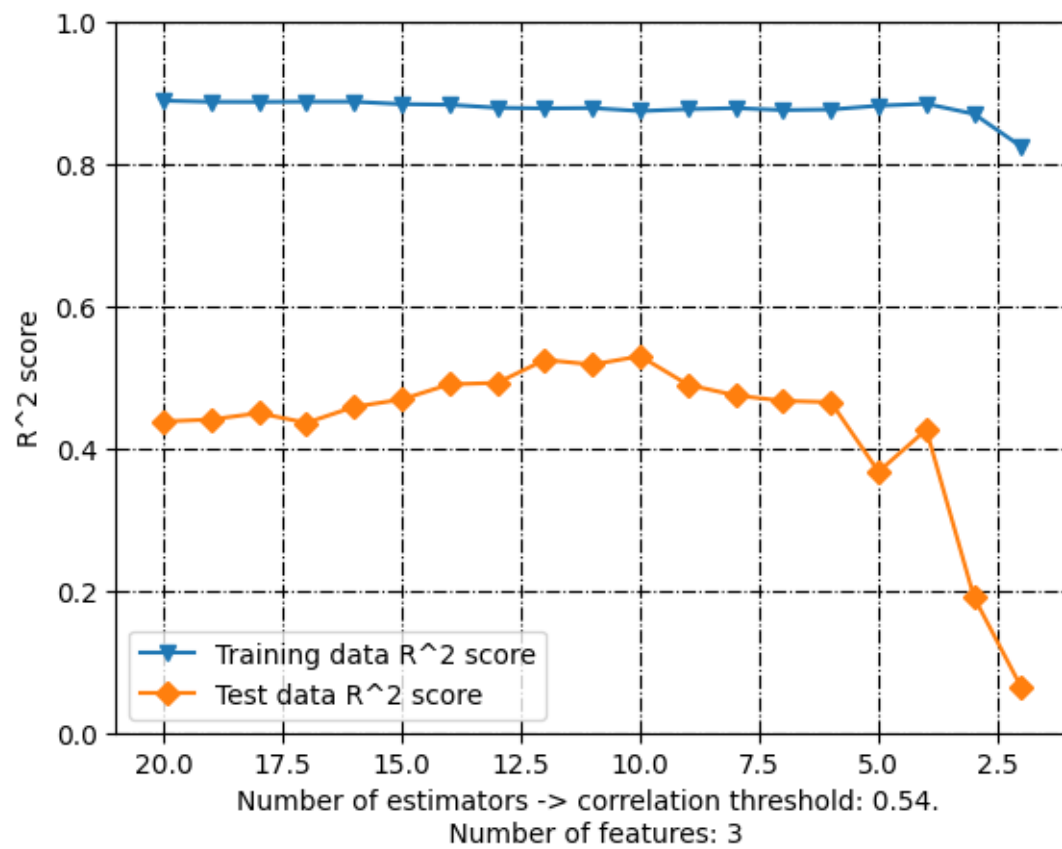

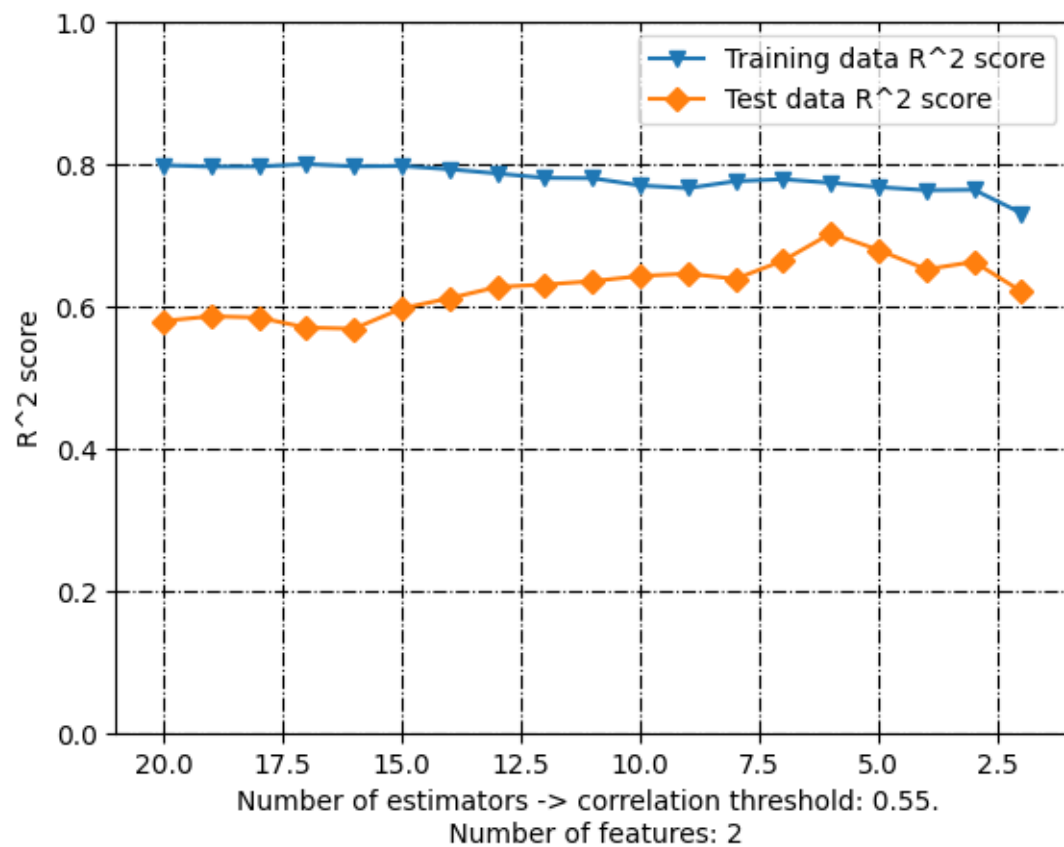

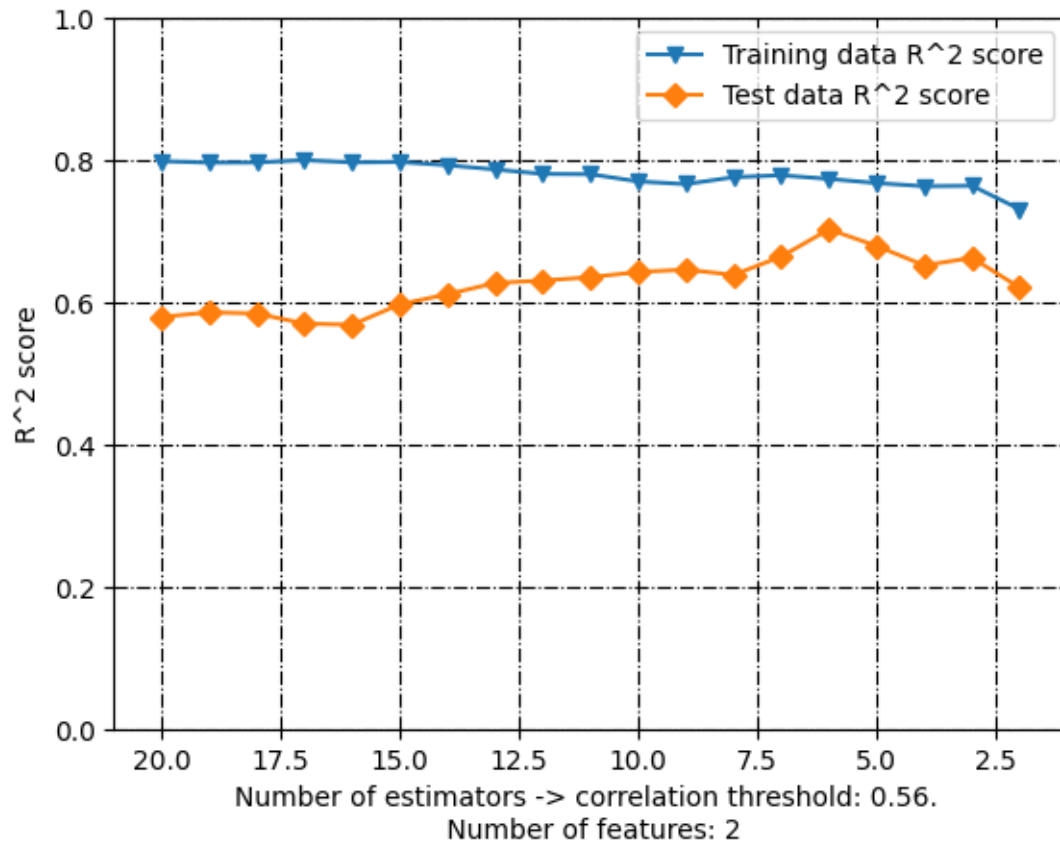

```
[28]: plt.plot(df_without_standardization['Correlation threshold'],  
             df_without_standardization['Number of features'], label = "Number of  
             features", marker='.')  
plt.legend()  
plt.xlabel('Correlation threshold')  
plt.ylabel('Number of features')  
plt.show()
```



[ ]:

## 4 KNeighborsRegressor

```
[29]: without_standardization, train_r2_, test_r2_, hist1, hist2, target_column_name,
      ↪ training_data_RMSE, test_data_RMSE = pred_model.
      ↪ prepare_data_and_create_model(molecular_descriptors_df=data,
      ↪
      ↪         correlation_threshold=0.50,
      ↪
      ↪         standardization=False,
      ↪
      ↪         model_type='KNeighborsRegressor',
      ↪
      ↪         target_column_name = target,
      ↪
      ↪         random_state=random_state,
      ↪
      ↪         train_test_split_=True,
```

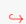

verbose=True)



I am not doing standardization...

```
molecular descriptor name
0          AATSOZ
1          AATSOare
2          AATSOd
3          AATSOdv
4          AATSOi
molecular descriptor name  corr_value
0          AATSOZ          -0.020817
1          AATSOare        -0.148257
2          AATSOd           0.022999
3          AATSOdv         -0.137980
4          AATSOi           0.133257
molecular descriptor name  corr_value  absolute correlation value
0          AATSOZ          -0.020817          0.020817
1          AATSOare        -0.148257          0.148257
2          AATSOd           0.022999          0.022999
3          AATSOdv         -0.137980          0.137980
4          AATSOi           0.133257          0.133257
molecular descriptor name  corr_value  absolute correlation value
226          AMID_O        -0.546843          0.546843
505          EState_VSA5    -0.588780          0.588780
556          GATS2c         0.511671          0.511671
791          MDEO-12        -0.582747          0.582747
847          NdO            -0.500462          0.500462
molecular descriptor name  corr_value  absolute correlation value
226          AMID_O        -0.546843          0.546843
505          EState_VSA5    -0.588780          0.588780
556          GATS2c         0.511671          0.511671
791          MDEO-12        -0.582747          0.582747
847          NdO            -0.500462          0.500462
The model used is: KNeighbors...
Return the coefficient of determination of the prediction:
0.41213440641996724
R^2 score: 0.5930480323404299
Correlation coefficient: 0.7700961188971348
Test data - unseen during training:
R^2 score: 0.41213440641996724
Correlation coefficient: 0.6419769516267443
[7.92248844 8.11468799 7.01522868 7.41847691 6.46171252 7.88647346
 7.5584839 7.3571585 7.66228244 7.58497861 7.03594008 7.10633176
 7.42711292 5.50538359 7.10633176 7.92248844 7.58497861 7.42711292]
44      8.004365
47      7.886057
4       7.002614
```

```

55      7.698970
26      5.070734
64      8.060481
73      7.130768
10      8.008774
40      7.795880
107     8.086186
18      6.924818
62      8.173925
11      7.962574
36      6.346787
89      8.102373
91      8.346787
109     7.886057
0       7.991400
Name: BALB/3T3, dtype: float64
Training Root Mean Square Error: 0.5620377814804579
Testing Root Mean Square Error: 0.6104410339578933

```

```

[30]: print(target_column_name+str('_transformed'))
      print(hist1[target_column_name].hist())

```

```

BALB/3T3_transformed
AxesSubplot(0.125,0.11;0.775x0.77)

```





```
[31]: with_standardization, train_r2_, test_r2_, hist1, hist2, target_column_name,
      ↪ training_data_RMSE, test_data_RMSE = pred_model.
      ↪ prepare_data_and_create_model(molecular_descriptors_df=data,
      ↪
      ↪         correlation_threshold=0.50,
      ↪
      ↪         standardization=True,
      ↪
      ↪         model_type='KNeighborsRegressor',
      ↪
      ↪         target_column_name = target,
      ↪
      ↪         random_state=random_state,
      ↪
      ↪         train_test_split_=True,
      ↪
      ↪         verbose=True)
```

I am doing standardization...

|   | molecular descriptor name |  |
|---|---------------------------|--|
| 0 | AATS0Z                    |  |
| 1 | AATS0are                  |  |
| 2 | AATS0d                    |  |
| 3 | AATS0dv                   |  |
| 4 | AATS0i                    |  |

  

|   | molecular descriptor name | corr_value |
|---|---------------------------|------------|
| 0 | AATS0Z                    | -0.020817  |
| 1 | AATS0are                  | -0.148257  |
| 2 | AATS0d                    | 0.022999   |
| 3 | AATS0dv                   | -0.137980  |
| 4 | AATS0i                    | 0.133257   |

  

|   | molecular descriptor name | corr_value | absolute correlation value |
|---|---------------------------|------------|----------------------------|
| 0 | AATS0Z                    | -0.020817  | 0.020817                   |
| 1 | AATS0are                  | -0.148257  | 0.148257                   |
| 2 | AATS0d                    | 0.022999   | 0.022999                   |
| 3 | AATS0dv                   | -0.137980  | 0.137980                   |
| 4 | AATS0i                    | 0.133257   | 0.133257                   |

  

|     | molecular descriptor name | corr_value | absolute correlation value |
|-----|---------------------------|------------|----------------------------|
| 226 | AMID_0                    | -0.546843  | 0.546843                   |
| 505 | EState_VSA5               | -0.588780  | 0.588780                   |
| 556 | GATS2c                    | 0.511671   | 0.511671                   |
| 791 | MDE0-12                   | -0.582747  | 0.582747                   |
| 847 | NdO                       | -0.500462  | 0.500462                   |

  

|     | molecular descriptor name | corr_value | absolute correlation value |
|-----|---------------------------|------------|----------------------------|
| 226 | AMID_0                    | -0.546843  | 0.546843                   |
| 505 | EState_VSA5               | -0.588780  | 0.588780                   |

|     |         |           |          |
|-----|---------|-----------|----------|
| 556 | GATS2c  | 0.511671  | 0.511671 |
| 791 | MDE0-12 | -0.582747 | 0.582747 |
| 847 | NdO     | -0.500462 | 0.500462 |

The model used is: KNeighbors...

Return the coefficient of determination of the prediction:

0.41213440641996724

R<sup>2</sup> score: 0.5930480323404299

Correlation coefficient: 0.7700961188971348

Test data - unseen during training:

R<sup>2</sup> score: 0.41213440641996724

Correlation coefficient: 0.6419769516267443

[7.92248844 8.11468799 7.01522868 7.41847691 6.46171252 7.88647346  
7.5584839 7.3571585 7.66228244 7.58497861 7.03594008 7.10633176  
7.42711292 5.50538359 7.10633176 7.92248844 7.58497861 7.42711292]

44 8.004365  
47 7.886057  
4 7.002614  
55 7.698970  
26 5.070734  
64 8.060481  
73 7.130768  
10 8.008774  
40 7.795880  
107 8.086186  
18 6.924818  
62 8.173925  
11 7.962574  
36 6.346787  
89 8.102373  
91 8.346787  
109 7.886057  
0 7.991400

Name: BALB/3T3, dtype: float64

Training Root Mean Square Error: 0.5620377814804579

Testing Root Mean Square Error: 0.6104410339578933

#### 4.1 Search inside correlation space

```
[32]: step = 0.01
initial_step = corr_low
last_step = corr_high
first_list = [x / 100.0 for x in range(int(initial_step*100),
    ↪int(last_step*100), int(step*100))]
second_list = []
third_list = []
fourth_l = []
fifth_l = []
```

```

f_list = []
for i in first_list:
    without_standardization, train_r2, test_r2, _, h_, target_column_name, \
    ↪ training_data_RMSE, test_data_RMSE = pred_model.
    ↪ prepare_data_and_create_model(molecular_descriptors_df = data,

    ↪ correlation_threshold = i,

    ↪ standardization = False,

    ↪ model_type = 'KNeighborsRegressor',

    ↪ target_column_name = target,

    ↪ random_state=random_state,

    ↪ train_test_split_ = True,

    ↪ verbose = False)
    second_list.append(train_r2)
    third_list.append(test_r2)
    fourth_l.append(training_data_RMSE)
    fifth_l.append(test_data_RMSE)
    f_list.append(len(h_))

```

File "C:\Users\aleks\anaconda3\envs\cheminf\_gpu\lib\site-packages\joblib\externals\loky\backend\context.py", line 217, in \_count\_physical\_cores  
raise ValueError(

```

[33]: df_without_standardization = pd.DataFrame(data=first_list, \
    ↪ columns=["Correlation threshold"])
df_without_standardization['Training data R^2 score'] = second_list
df_without_standardization['Test data R^2 score'] = third_list
df_without_standardization['Training RMSE'] = fourth_l
df_without_standardization['Test RMSE'] = fifth_l
df_without_standardization['Number of features'] = f_list

```

```

[34]: df_k_nearest = df_without_standardization.copy()
df_without_standardization

```

```

[34]: Correlation threshold  Training data R^2 score  Test data R^2 score  \
0          0.33          0.579637          0.195021
1          0.34          0.612206          0.112471
2          0.35          0.612206          0.112471
3          0.36          0.612206          0.112471
4          0.37          0.612206          0.112471

```

|    |      |          |          |
|----|------|----------|----------|
| 5  | 0.38 | 0.612206 | 0.151377 |
| 6  | 0.39 | 0.654638 | 0.222194 |
| 7  | 0.40 | 0.654638 | 0.222194 |
| 8  | 0.41 | 0.607745 | 0.238325 |
| 9  | 0.42 | 0.591628 | 0.095145 |
| 10 | 0.43 | 0.595486 | 0.405419 |
| 11 | 0.44 | 0.578461 | 0.364451 |
| 12 | 0.45 | 0.589545 | 0.451468 |
| 13 | 0.46 | 0.592920 | 0.449529 |
| 14 | 0.47 | 0.597083 | 0.460702 |
| 15 | 0.48 | 0.591905 | 0.436552 |
| 16 | 0.49 | 0.581925 | 0.383116 |
| 17 | 0.50 | 0.593048 | 0.412134 |
| 18 | 0.51 | 0.585189 | 0.370109 |
| 19 | 0.52 | 0.578779 | 0.399724 |
| 20 | 0.53 | 0.579822 | 0.408287 |
| 21 | 0.54 | 0.579822 | 0.408287 |
| 22 | 0.55 | 0.542320 | 0.347880 |
| 23 | 0.56 | 0.542320 | 0.347880 |

|    | Training RMSE | Test RMSE | Number of features |
|----|---------------|-----------|--------------------|
| 0  | 0.571224      | 0.714327  | 83                 |
| 1  | 0.548649      | 0.750060  | 70                 |
| 2  | 0.548649      | 0.750060  | 64                 |
| 3  | 0.548649      | 0.750060  | 59                 |
| 4  | 0.548649      | 0.750060  | 55                 |
| 5  | 0.548649      | 0.733436  | 51                 |
| 6  | 0.517763      | 0.702167  | 46                 |
| 7  | 0.517763      | 0.702167  | 41                 |
| 8  | 0.551795      | 0.694848  | 32                 |
| 9  | 0.563018      | 0.757346  | 28                 |
| 10 | 0.560352      | 0.613918  | 23                 |
| 11 | 0.572022      | 0.634716  | 21                 |
| 12 | 0.564451      | 0.589665  | 17                 |
| 13 | 0.562126      | 0.590707  | 16                 |
| 14 | 0.559245      | 0.584681  | 15                 |
| 15 | 0.562826      | 0.597629  | 14                 |
| 16 | 0.569667      | 0.625326  | 10                 |
| 17 | 0.562038      | 0.610441  | 7                  |
| 18 | 0.567439      | 0.631884  | 6                  |
| 19 | 0.571806      | 0.616851  | 5                  |
| 20 | 0.571098      | 0.612435  | 3                  |
| 21 | 0.571098      | 0.612435  | 3                  |
| 22 | 0.596039      | 0.642937  | 2                  |
| 23 | 0.596039      | 0.642937  | 2                  |

## 4.2 Plots

```
[35]: plt.plot(df_without_standardization['Correlation threshold'],  
             df_without_standardization['Training data R^2 score'], label = "Training_  
             data R^2 score", marker='v')  
plt.plot(df_without_standardization['Correlation threshold'],  
         df_without_standardization['Test data R^2 score'], label = "Test data R^2_  
         score", marker='D')  
plt.legend()  
plt.xlabel('Correlation threshold')  
plt.ylabel('R^2 score')  
plt.ylim([0, 1])  
plt.show()
```

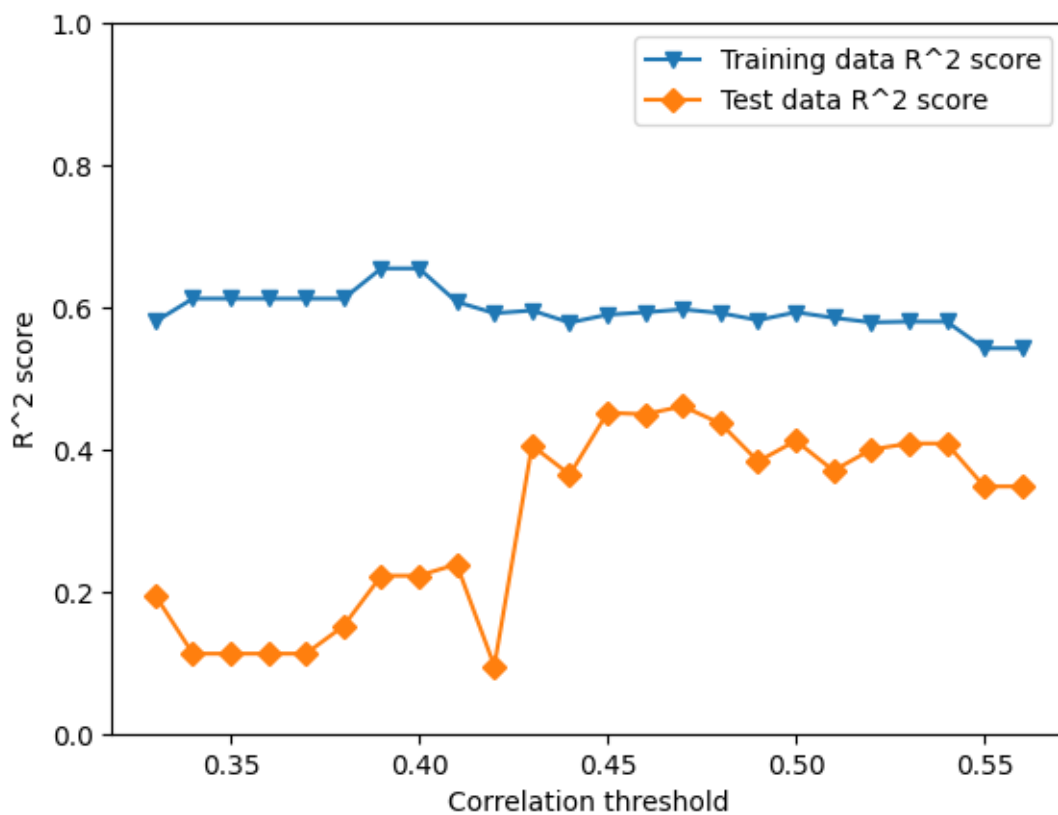

```
[36]: plt.plot(df_without_standardization['Correlation threshold'],  
             df_without_standardization['Number of features'], label = "Number of_  
             features", marker='.')  
plt.legend()  
plt.xlabel('Correlation threshold')  
plt.ylabel('Number of features')  
plt.show()
```



[ ]:

## 5 Support Vector Machines (SVM)

```
[37]: without_standardization, train_r2_, test_r2_, hist1, hist2, target_column_name,
      ↪ training_data_RMSE, test_data_RMSE = pred_model.
      ↪ prepare_data_and_create_model(molecular_descriptors_df=data,
      ↪
      ↪         correlation_threshold=0.50,
      ↪
      ↪         standardization=False,
      ↪
      ↪         model_type='SVR',
      ↪
      ↪         kernel_ = 'linear',
      ↪
      ↪         gamma_ = 'auto',
      ↪
      ↪         target_column_name = target,
```

```

    random_state=random_state,

    train_test_split_=True,

    verbose=True)

```

I am not doing standardization...

|   | molecular descriptor name |  |
|---|---------------------------|--|
| 0 | AATSOZ                    |  |
| 1 | AATSOare                  |  |
| 2 | AATSOd                    |  |
| 3 | AATSOdv                   |  |
| 4 | AATSOi                    |  |

  

|   | molecular descriptor name | corr_value |
|---|---------------------------|------------|
| 0 | AATSOZ                    | -0.020817  |
| 1 | AATSOare                  | -0.148257  |
| 2 | AATSOd                    | 0.022999   |
| 3 | AATSOdv                   | -0.137980  |
| 4 | AATSOi                    | 0.133257   |

  

|   | molecular descriptor name | corr_value | absolute correlation value |
|---|---------------------------|------------|----------------------------|
| 0 | AATSOZ                    | -0.020817  | 0.020817                   |
| 1 | AATSOare                  | -0.148257  | 0.148257                   |
| 2 | AATSOd                    | 0.022999   | 0.022999                   |
| 3 | AATSOdv                   | -0.137980  | 0.137980                   |
| 4 | AATSOi                    | 0.133257   | 0.133257                   |

  

|     | molecular descriptor name | corr_value | absolute correlation value |
|-----|---------------------------|------------|----------------------------|
| 226 | AMID_0                    | -0.546843  | 0.546843                   |
| 505 | EState_VSA5               | -0.588780  | 0.588780                   |
| 556 | GATS2c                    | 0.511671   | 0.511671                   |
| 791 | MDEO-12                   | -0.582747  | 0.582747                   |
| 847 | NdO                       | -0.500462  | 0.500462                   |

  

|     | molecular descriptor name | corr_value | absolute correlation value |
|-----|---------------------------|------------|----------------------------|
| 226 | AMID_0                    | -0.546843  | 0.546843                   |
| 505 | EState_VSA5               | -0.588780  | 0.588780                   |
| 556 | GATS2c                    | 0.511671   | 0.511671                   |
| 791 | MDEO-12                   | -0.582747  | 0.582747                   |
| 847 | NdO                       | -0.500462  | 0.500462                   |

The model used is: SVR...

Return the coefficient of determination of the prediction:

0.44709623399096254

R<sup>2</sup> score: 0.5159297330048184

Correlation coefficient: 0.7182824883044403

Test data - unseen during training:

R<sup>2</sup> score: 0.44709623399096254

Correlation coefficient: 0.6686525510240445

[8.00016581 8.05093548 7.42238496 7.14876453 6.07021375 7.5208028

```

7.76394424 7.5899862 7.99109813 7.60464267 7.50180307 6.68220808
7.72363523 6.28477308 7.21990624 8.00043516 7.60215619 7.73146765]
44      8.004365
47      7.886057
4       7.002614
55      7.698970
26      5.070734
64      8.060481
73      7.130768
10      8.008774
40      7.795880
107     8.086186
18      6.924818
62      8.173925
11      7.962574
36      6.346787
89      8.102373
91      8.346787
109     7.886057
0       7.991400

```

Name: BALB/3T3, dtype: float64

Training Root Mean Square Error: 0.6129825880081178

Testing Root Mean Square Error: 0.5920105851521211

```

[38]: print(target_column_name+str('_transformed'))
      print(hist1[target_column_name].hist())

```

BALB/3T3\_transformed

AxesSubplot(0.125,0.11;0.775x0.77)





```
[39]: with_standardization, train_r2_, test_r2_, hist1, hist2, target_column_name,
      ↪ training_data_RMSE, test_data_RMSE = pred_model.
      ↪ prepare_data_and_create_model(molecular_descriptors_df=data,
      ↪
      ↪         correlation_threshold=0.50,
      ↪
      ↪         standardization=True,
      ↪
      ↪         model_type='SVR',
      ↪
      ↪         kernel_ = 'linear',
      ↪
      ↪         gamma_ = 'auto',
      ↪
      ↪         target_column_name = target,
      ↪
      ↪         random_state=random_state,
      ↪
      ↪         train_test_split_=True,
      ↪
      ↪         verbose=True)
```

I am doing standardization...

molecular descriptor name

|   |          |
|---|----------|
| 0 | AATSOZ   |
| 1 | AATSOare |
| 2 | AATSOd   |
| 3 | AATSOdv  |
| 4 | AATSOi   |

|   | molecular descriptor name | corr_value |
|---|---------------------------|------------|
| 0 | AATSOZ                    | -0.020817  |
| 1 | AATSOare                  | -0.148257  |
| 2 | AATSOd                    | 0.022999   |
| 3 | AATSOdv                   | -0.137980  |
| 4 | AATSOi                    | 0.133257   |

|   | molecular descriptor name | corr_value | absolute correlation value |
|---|---------------------------|------------|----------------------------|
| 0 | AATSOZ                    | -0.020817  | 0.020817                   |
| 1 | AATSOare                  | -0.148257  | 0.148257                   |
| 2 | AATSOd                    | 0.022999   | 0.022999                   |
| 3 | AATSOdv                   | -0.137980  | 0.137980                   |
| 4 | AATSOi                    | 0.133257   | 0.133257                   |

|     | molecular descriptor name | corr_value | absolute correlation value |
|-----|---------------------------|------------|----------------------------|
| 226 | AMID_O                    | -0.546843  | 0.546843                   |
| 505 | EState_VSA5               | -0.588780  | 0.588780                   |
| 556 | GATS2c                    | 0.511671   | 0.511671                   |
| 791 | MDEO-12                   | -0.582747  | 0.582747                   |
| 847 | NdO                       | -0.500462  | 0.500462                   |

|     | molecular descriptor name | corr_value | absolute correlation value |
|-----|---------------------------|------------|----------------------------|
| 226 | AMID_O                    | -0.546843  | 0.546843                   |
| 505 | EState_VSA5               | -0.588780  | 0.588780                   |
| 556 | GATS2c                    | 0.511671   | 0.511671                   |
| 791 | MDEO-12                   | -0.582747  | 0.582747                   |
| 847 | NdO                       | -0.500462  | 0.500462                   |

The model used is: SVR...

Return the coefficient of determination of the prediction:

0.44709623399096254

R<sup>2</sup> score: 0.5159297330048184

Correlation coefficient: 0.7182824883044403

Test data - unseen during training:

R<sup>2</sup> score: 0.44709623399096254

Correlation coefficient: 0.6686525510240445

[8.00016581 8.05093548 7.42238496 7.14876453 6.07021375 7.5208028  
7.76394424 7.5899862 7.99109813 7.60464267 7.50180307 6.68220808  
7.72363523 6.28477308 7.21990624 8.00043516 7.60215619 7.73146765]

|    |          |
|----|----------|
| 44 | 8.004365 |
| 47 | 7.886057 |
| 4  | 7.002614 |
| 55 | 7.698970 |
| 26 | 5.070734 |
| 64 | 8.060481 |

```

73      7.130768
10      8.008774
40      7.795880
107     8.086186
18      6.924818
62      8.173925
11      7.962574
36      6.346787
89      8.102373
91      8.346787
109     7.886057
0       7.991400

```

Name: BALB/3T3, dtype: float64

Training Root Mean Square Error: 0.6129825880081178

Testing Root Mean Square Error: 0.5920105851521211

## 5.1 Search inside correlation space

```

[40]: step = 0.01
      initial_step = corr_low
      last_step = corr_high
      first_list = [x / 100.0 for x in range(int(initial_step*100),
      ↪int(last_step*100), int(step*100))]
      second_list = []
      third_list = []
      fourth_l = []
      fifth_l = []
      f_list = []
      for i in first_list:
          without_standardization, train_r2, test_r2, _, h_, target_column_name,
          ↪training_data_RMSE, test_data_RMSE = pred_model.
          ↪prepare_data_and_create_model(molecular_descriptors_df = data,

          ↪
          ↪correlation_threshold = i,
          ↪
          ↪standardization = False,
          ↪
          ↪model_type = 'SVR',
          ↪
          ↪kernel_ = 'linear',
          ↪
          ↪gamma_ = 'auto',
          ↪
          ↪target_column_name = target,
          ↪
          ↪random_state=random_state,

```

```

    ↪          train_test_split_ = True,

    ↪          verbose = False)
    second_list.append(train_r2)
    third_list.append(test_r2)
    fourth_l.append(training_data_RMSE)
    fifth_l.append(test_data_RMSE)
    f_list.append(len(h_))

```

```

[41]: df_without_standardization = pd.DataFrame(data=first_list,
    ↪      columns=["Correlation threshold"])
df_without_standardization['Training data R^2 score'] = second_list
df_without_standardization['Test data R^2 score'] = third_list
df_without_standardization['Training RMSE'] = fourth_l
df_without_standardization['Test RMSE'] = fifth_l
df_without_standardization['Number of features'] = f_list

```

```

[42]: df_svm = df_without_standardization.copy()
df_without_standardization

```

```

[42]:
Correlation threshold  Training data R^2 score  Test data R^2 score  \
0                    0.33                0.752351        0.638549
1                    0.34                0.679781        0.469111
2                    0.35                0.678435        0.413280
3                    0.36                0.675955        0.504552
4                    0.37                0.663070        0.324430
5                    0.38                0.660186        0.367016
6                    0.39                0.645235        0.453820
7                    0.40                0.644395        0.454880
8                    0.41                0.619180        0.617244
9                    0.42                0.582879        0.711228
10                   0.43                0.577743        0.709262
11                   0.44                0.556430        0.572454
12                   0.45                0.565542        0.588193
13                   0.46                0.565206        0.587915
14                   0.47                0.560389        0.550276
15                   0.48                0.563970        0.480963
16                   0.49                0.556276        0.462398
17                   0.50                0.515930        0.447096
18                   0.51                0.494480        0.480944
19                   0.52                0.495580        0.480057
20                   0.53                0.468545        0.512913
21                   0.54                0.468545        0.512913
22                   0.55                0.468300        0.511190
23                   0.56                0.468300        0.511190

```

|    | Training RMSE | Test RMSE | Number of features |
|----|---------------|-----------|--------------------|
| 0  | 0.438442      | 0.478662  | 83                 |
| 1  | 0.498560      | 0.580105  | 70                 |
| 2  | 0.499607      | 0.609846  | 64                 |
| 3  | 0.501530      | 0.560407  | 59                 |
| 4  | 0.511404      | 0.654395  | 55                 |
| 5  | 0.513588      | 0.633433  | 51                 |
| 6  | 0.524764      | 0.588400  | 46                 |
| 7  | 0.525385      | 0.587829  | 41                 |
| 8  | 0.543693      | 0.492567  | 32                 |
| 9  | 0.569016      | 0.427841  | 28                 |
| 10 | 0.572509      | 0.429295  | 23                 |
| 11 | 0.586780      | 0.520590  | 21                 |
| 12 | 0.580722      | 0.510918  | 17                 |
| 13 | 0.580946      | 0.511091  | 16                 |
| 14 | 0.584155      | 0.533922  | 15                 |
| 15 | 0.581771      | 0.573593  | 14                 |
| 16 | 0.586882      | 0.583761  | 10                 |
| 17 | 0.612983      | 0.592011  | 7                  |
| 18 | 0.626417      | 0.573604  | 6                  |
| 19 | 0.625734      | 0.574093  | 5                  |
| 20 | 0.642284      | 0.555659  | 3                  |
| 21 | 0.642284      | 0.555659  | 3                  |
| 22 | 0.642432      | 0.556640  | 2                  |
| 23 | 0.642432      | 0.556640  | 2                  |

## 5.2 Plots

```
[43]: plt.plot(df_without_standardization['Correlation threshold'],
             df_without_standardization['Training data R^2 score'], label = "Training
             data R^2 score", marker='v')
plt.plot(df_without_standardization['Correlation threshold'],
             df_without_standardization['Test data R^2 score'], label = "Test data R^2
             score", marker='D')
plt.legend()
plt.xlabel('Correlation threshold')
plt.ylabel('R^2 score')
plt.ylim([0, 1])
plt.show()
```

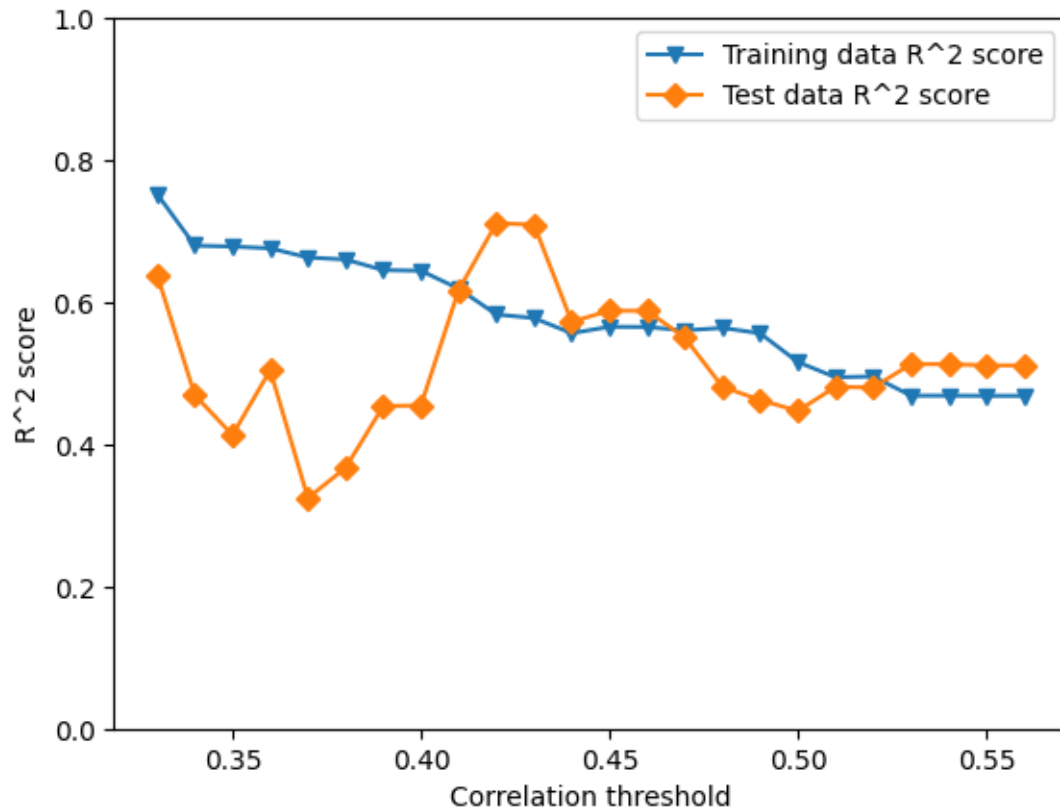

```
[44]: plt.plot(df_without_standardization['Correlation threshold'],  
            df_without_standardization['Number of features'], label = "Number of_  
            features", marker='.')  
plt.legend()  
plt.xlabel('Correlation threshold')  
plt.ylabel('Number of features')  
plt.show()
```



### 5.3 Store quality measurements

```
[45]: with pd.ExcelWriter('../Data/Quality_'+BALB_3T3+'_'+str(random_state)+'_'.  
      ↪xlsx') as writer:  
      df_linear.to_excel(writer, sheet_name='MLR')  
      df_decision_tree.to_excel(writer, sheet_name='DT')  
      df_random_forest.to_excel(writer, sheet_name='RF')  
      df_k_nearest.to_excel(writer, sheet_name='KNN')  
      df_svm.to_excel(writer, sheet_name='SVM')
```

# Notebook

January 18, 2024

## 1 File 21

```
[1]: import sys
from pathlib import Path
prediction_mode_path = Path("../module")
sys.path.append(prediction_mode_path.as_posix())
import models_creation as pred_model

import pandas as pd
import numpy as np

from sklearn.metrics import r2_score

import matplotlib.pyplot as plt
from sklearn.tree import plot_tree

from matplotlib import pyplot as plt

import joblib

import warnings
warnings.filterwarnings('ignore')
```

```
[2]: load_prepared_data = pd.read_excel('../Data/Kolchicyna_machine_learning.xlsx')
load_prepared_data = load_prepared_data.drop(columns=['Unnamed: 0'])

target = 'LoVo/DX'

corr_low = 0.33
corr_high = 0.64

random_state = 15
```

```
[3]: load_prepared_data.head()
```

```
[3]:      AATSOZ  AATSOare  AATSOd  AATSOdv  AATSOi  AATSOm  AATSOp  \
0  25.090909  6.046518  3.109091  6.662626  160.775045  99.075564  1.555512
1  24.448276  6.008422  3.051724  6.386973  161.021674  96.473315  1.538471
```



|   |           |          |          |          |            |           |          |
|---|-----------|----------|----------|----------|------------|-----------|----------|
| 2 | 23.868852 | 5.974074 | 3.000000 | 6.138434 | 161.244045 | 94.127025 | 1.523105 |
| 3 | 23.868852 | 5.974074 | 3.032787 | 6.171220 | 161.244045 | 94.127025 | 1.523105 |
| 4 | 23.343750 | 5.942945 | 2.953125 | 5.913194 | 161.445569 | 92.000700 | 1.509180 |

|   | AATS0pe  | AATS0s   | AATS0se  | ... | A549_float | MCF-7_float | LoVo_float | \ |
|---|----------|----------|----------|-----|------------|-------------|------------|---|
| 0 | 6.126680 | 3.435416 | 7.629859 | ... | 10.8       | 10.3        | 6.5        |   |
| 1 | 6.088791 | 3.330998 | 7.596891 | ... | 11.6       | 12.0        | 8.5        |   |
| 2 | 6.054630 | 3.236850 | 7.567166 | ... | 10.9       | 12.2        | 8.8        |   |
| 3 | 6.054630 | 3.257798 | 7.567166 | ... | 10.5       | 11.3        | 8.5        |   |
| 4 | 6.023670 | 3.151529 | 7.540228 | ... | 89.5       | 92.7        | 52.8       |   |

|   | LoVo/DX_float | BALB/3T3_float | A549_float_transformed | \ |
|---|---------------|----------------|------------------------|---|
| 0 | 54.9          | 10.2           | 7.966576               |   |
| 1 | 31.1          | 14.3           | 7.935542               |   |
| 2 | 17.9          | 11.7           | 7.962574               |   |
| 3 | 10.2          | 11.0           | 7.978811               |   |
| 4 | 77.8          | 99.4           | 7.048177               |   |

|   | MCF-7_float_transformed | LoVo_float_transformed | LoVo/DX_float_transformed | \ |
|---|-------------------------|------------------------|---------------------------|---|
| 0 | 7.987163                | 8.187087               | 7.260428                  |   |
| 1 | 7.920819                | 8.070581               | 7.507240                  |   |
| 2 | 7.913640                | 8.055517               | 7.747147                  |   |
| 3 | 7.946922                | 8.070581               | 7.991400                  |   |
| 4 | 7.032920                | 7.277366               | 7.109020                  |   |

|   | BALB/3T3_float_transformed |
|---|----------------------------|
| 0 | 7.991400                   |
| 1 | 7.844664                   |
| 2 | 7.931814                   |
| 3 | 7.958607                   |
| 4 | 7.002614                   |

[5 rows x 1221 columns]

```
[4]: data = load_prepared_data[list(load_prepared_data.columns)[0:-10]]
data[target] = load_prepared_data[load_prepared_data.columns[-2]]
data.head()
```

|   | AATS0Z    | AATS0are | AATS0d   | AATS0dv  | AATS0i     | AATS0m    | AATS0p   | \ |
|---|-----------|----------|----------|----------|------------|-----------|----------|---|
| 0 | 25.090909 | 6.046518 | 3.109091 | 6.662626 | 160.775045 | 99.075564 | 1.555512 |   |
| 1 | 24.448276 | 6.008422 | 3.051724 | 6.386973 | 161.021674 | 96.473315 | 1.538471 |   |
| 2 | 23.868852 | 5.974074 | 3.000000 | 6.138434 | 161.244045 | 94.127025 | 1.523105 |   |
| 3 | 23.868852 | 5.974074 | 3.032787 | 6.171220 | 161.244045 | 94.127025 | 1.523105 |   |
| 4 | 23.343750 | 5.942945 | 2.953125 | 5.913194 | 161.445569 | 92.000700 | 1.509180 |   |

|   | AATS0pe  | AATS0s   | AATS0se  | ... | piPC10   | piPC2    | piPC3    | piPC4    | \ |
|---|----------|----------|----------|-----|----------|----------|----------|----------|---|
| 0 | 6.126680 | 3.435416 | 7.629859 | ... | 7.999655 | 4.266195 | 4.915408 | 5.516700 |   |

|   |          |          |          |     |          |          |          |          |
|---|----------|----------|----------|-----|----------|----------|----------|----------|
| 1 | 6.088791 | 3.330998 | 7.596891 | ... | 8.018726 | 4.280132 | 4.922714 | 5.520711 |
| 2 | 6.054630 | 3.236850 | 7.567166 | ... | 8.028799 | 4.293878 | 4.929967 | 5.524706 |
| 3 | 6.054630 | 3.257798 | 7.567166 | ... | 8.037440 | 4.307438 | 4.929967 | 5.524706 |
| 4 | 6.023670 | 3.151529 | 7.540228 | ... | 8.034892 | 4.307438 | 4.937168 | 5.528685 |

|   | piPC5    | piPC6    | piPC7    | piPC8    | piPC9    | LoVo/DX  |
|---|----------|----------|----------|----------|----------|----------|
| 0 | 6.098566 | 6.595759 | 6.979116 | 7.337313 | 7.681445 | 7.260428 |
| 1 | 6.103048 | 6.601209 | 6.985613 | 7.349442 | 7.695531 | 7.507240 |
| 2 | 6.105281 | 6.603923 | 6.989306 | 7.353932 | 7.704023 | 7.747147 |
| 3 | 6.107510 | 6.606629 | 6.992068 | 7.361425 | 7.709420 | 7.991400 |
| 4 | 6.107510 | 6.605277 | 6.991148 | 7.356489 | 7.707175 | 7.109020 |

[5 rows x 1212 columns]

```
[5]: print(data.shape)
data = data.dropna()
data.shape
```

(120, 1212)

[5]: (106, 1212)

## 2 Multiple Linear regression (MLR)

```
[6]: without_standardization, train_r2_, test_r2_, hist1, hist2, target_column_name,
      ↪ training_data_RMSE, test_data_RMSE = pred_model.
      ↪ prepare_data_and_create_model(molecular_descriptors_df=data,
      ↪
      ↪ correlation_threshold=0.5,
      ↪
      ↪ standardization=False,
      ↪
      ↪ model_type='linear_model',
      ↪
      ↪ target_column_name = str(target),
      ↪
      ↪ random_state=random_state,
      ↪
      ↪ train_test_split_=True,
      ↪
      ↪ verbose=True)
```

I am not doing standardization...

|   | molecular descriptor name |
|---|---------------------------|
| 0 | AATS0Z                    |
| 1 | AATS0are                  |
| 2 | AATS0d                    |

|     |                           |            |                            |
|-----|---------------------------|------------|----------------------------|
| 3   | AATS0dv                   |            |                            |
| 4   | AATS0i                    |            |                            |
|     | molecular descriptor name | corr_value |                            |
| 0   | AATS0Z                    | 0.018677   |                            |
| 1   | AATS0are                  | -0.341313  |                            |
| 2   | AATS0d                    | -0.123443  |                            |
| 3   | AATS0dv                   | -0.265670  |                            |
| 4   | AATS0i                    | -0.428929  |                            |
|     | molecular descriptor name | corr_value | absolute correlation value |
| 0   | AATS0Z                    | 0.018677   | 0.018677                   |
| 1   | AATS0are                  | -0.341313  | 0.341313                   |
| 2   | AATS0d                    | -0.123443  | 0.123443                   |
| 3   | AATS0dv                   | -0.265670  | 0.265670                   |
| 4   | AATS0i                    | -0.428929  | 0.428929                   |
|     | molecular descriptor name | corr_value | absolute correlation value |
| 15  | AATS1i                    | -0.561620  | 0.561620                   |
| 113 | AATSC1c                   | 0.565682   | 0.565682                   |
| 125 | AATSC2c                   | -0.543393  | 0.543393                   |
| 221 | AETA_eta_R                | -0.515778  | 0.515778                   |
| 224 | AMID_C                    | 0.532458   | 0.532458                   |
|     | molecular descriptor name | corr_value | absolute correlation value |
| 15  | AATS1i                    | -0.561620  | 0.561620                   |
| 113 | AATSC1c                   | 0.565682   | 0.565682                   |
| 125 | AATSC2c                   | -0.543393  | 0.543393                   |
| 221 | AETA_eta_R                | -0.515778  | 0.515778                   |
| 224 | AMID_C                    | 0.532458   | 0.532458                   |

The model used is: LinearReg..

Return the coefficient of determination of the prediction:

-1.0321044921399274

R<sup>2</sup> score: 0.923102060396964

Correlation coefficient: 0.960782004617574

Test data - unseen during training:

R<sup>2</sup> score: -1.0321044921399274

Correlation coefficient: nan

[6.46501046 7.15168096 5.6028327 5.08085315 6.81181054 4.25182797  
7.48467607 5.5582766 3.99921191 6.61153624 7.97920239 5.66537435  
7.06319213 4.96915563 7.01668286 6.14304559]

|     |          |
|-----|----------|
| 8   | 6.159455 |
| 110 | 6.065502 |
| 69  | 5.552842 |
| 95  | 5.200659 |
| 11  | 7.250264 |
| 104 | 6.000000 |
| 52  | 6.823909 |
| 112 | 6.853872 |
| 101 | 5.000000 |
| 50  | 5.769551 |
| 100 | 6.136677 |

```

103    6.000000
21     6.398375
60     5.537602
84     7.002177
39     6.638272
Name: LoVo/DX, dtype: float64
Training Root Mean Square Error: 0.2658491437480014
Testing Root Mean Square Error: 0.8972699205615916

```

```

[7]: print(target_column_name+str('_transformed'))
      print(hist1[target_column_name].hist())

```

```

LoVo/DX_transformed
AxesSubplot(0.125,0.11;0.775x0.77)

```

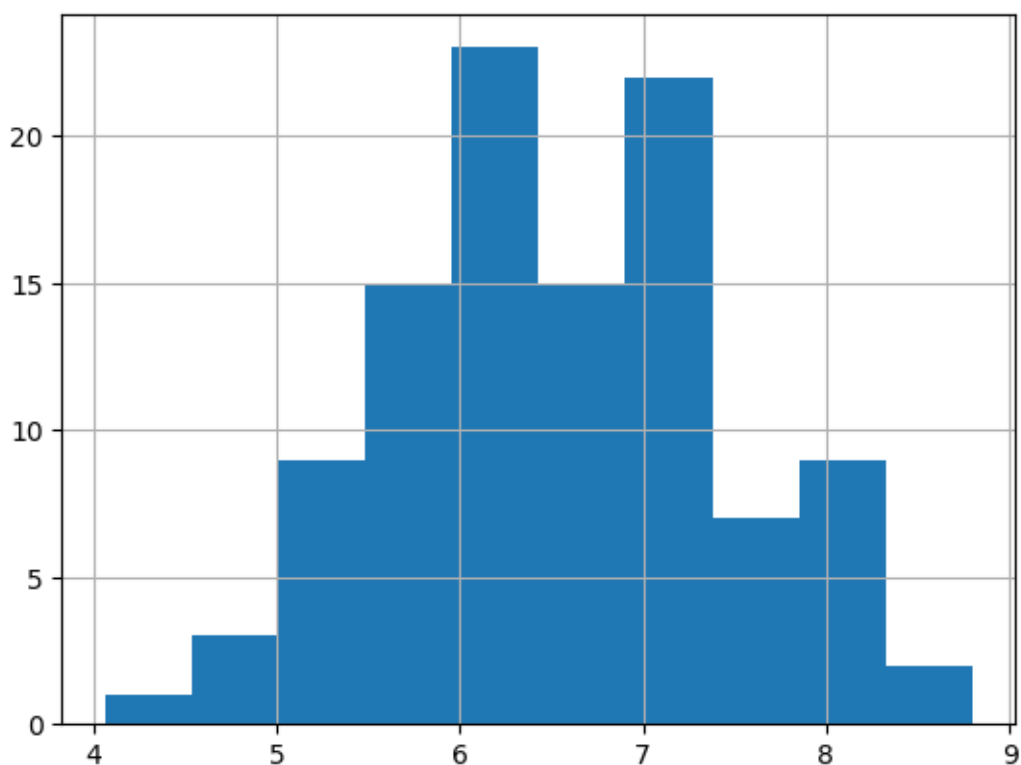

```

[8]: with_standardization, train_r2_, test_r2_, hist1, hist2, target_column_name,
      ↪ training_data_RMSE, test_data_RMSE = pred_model.
      ↪ prepare_data_and_create_model(molecular_descriptors_df=data,
      ↪
      ↪ correlation_threshold=0.50,
      ↪
      ↪ standardization=True,

```

```

↪      model_type='linear_model',
↪      target_column_name = target,
↪      random_state=random_state,
↪      train_test_split_=True,
↪      verbose=True)

```

I am doing standardization...

|   | molecular descriptor name |  |
|---|---------------------------|--|
| 0 | AATS0Z                    |  |
| 1 | AATS0are                  |  |
| 2 | AATS0d                    |  |
| 3 | AATS0dv                   |  |
| 4 | AATS0i                    |  |

  

|   | molecular descriptor name | corr_value |
|---|---------------------------|------------|
| 0 | AATS0Z                    | 0.018677   |
| 1 | AATS0are                  | -0.341313  |
| 2 | AATS0d                    | -0.123443  |
| 3 | AATS0dv                   | -0.265670  |
| 4 | AATS0i                    | -0.428929  |

  

|   | molecular descriptor name | corr_value | absolute correlation value |
|---|---------------------------|------------|----------------------------|
| 0 | AATS0Z                    | 0.018677   | 0.018677                   |
| 1 | AATS0are                  | -0.341313  | 0.341313                   |
| 2 | AATS0d                    | -0.123443  | 0.123443                   |
| 3 | AATS0dv                   | -0.265670  | 0.265670                   |
| 4 | AATS0i                    | -0.428929  | 0.428929                   |

  

|     | molecular descriptor name | corr_value | absolute correlation value |
|-----|---------------------------|------------|----------------------------|
| 15  | AATS1i                    | -0.561620  | 0.561620                   |
| 113 | AATSC1c                   | 0.565682   | 0.565682                   |
| 125 | AATSC2c                   | -0.543393  | 0.543393                   |
| 221 | AETA_eta_R                | -0.515778  | 0.515778                   |
| 224 | AMID_C                    | 0.532458   | 0.532458                   |

  

|     | molecular descriptor name | corr_value | absolute correlation value |
|-----|---------------------------|------------|----------------------------|
| 15  | AATS1i                    | -0.561620  | 0.561620                   |
| 113 | AATSC1c                   | 0.565682   | 0.565682                   |
| 125 | AATSC2c                   | -0.543393  | 0.543393                   |
| 221 | AETA_eta_R                | -0.515778  | 0.515778                   |
| 224 | AMID_C                    | 0.532458   | 0.532458                   |

The model used is: LinearReg...

Return the coefficient of determination of the prediction:

-1.0321044921399274

R<sup>2</sup> score: 0.923102060396964

Correlation coefficient: 0.960782004617574

Test data - unseen during training:

R<sup>2</sup> score: -1.0321044921399274

Correlation coefficient: nan

[6.46501046 7.15168096 5.6028327 5.08085315 6.81181054 4.25182797  
7.48467607 5.5582766 3.99921191 6.61153624 7.97920239 5.66537435  
7.06319213 4.96915563 7.01668286 6.14304559]

8 6.159455

110 6.065502

69 5.552842

95 5.200659

11 7.250264

104 6.000000

52 6.823909

112 6.853872

101 5.000000

50 5.769551

100 6.136677

103 6.000000

21 6.398375

60 5.537602

84 7.002177

39 6.638272

Name: LoVo/DX, dtype: float64

Training Root Mean Square Error: 0.2658491437480014

Testing Root Mean Square Error: 0.8972699205615916

## 2.1 Search inside correlation space

```
[9]: step = 0.01
initial_step = corr_low
last_step = corr_high
first_list = [x / 100.0 for x in range(int(initial_step*100),
    ↪int(last_step*100), int(step*100))]
second_list = []
third_list = []
fourth_l = []
fifth_l = []
f_list = []
for i in first_list:
    without_standardization, train_r2, test_r2, _, h_, target_column_name,
    ↪training_data_RMSE, test_data_RMSE = pred_model.
    ↪prepare_data_and_create_model(molecular_descriptors_df = data,

    ↪correlation_threshold = i,

    ↪standardization = False,
```

```

↪          model_type = 'linear_model',
↪          target_column_name = target,
↪          random_state=random_state,
↪          train_test_split_ = True,
↪          verbose = False)
second_list.append(train_r2)
third_list.append(test_r2)
fourth_l.append(training_data_RMSE)
fifth_l.append(test_data_RMSE)
f_list.append(len(h_))

```

```

[10]: df_without_standardization = pd.DataFrame(data=first_list,
↪       columns=["Correlation threshold"])
df_without_standardization['Training data R^2 score'] = second_list
df_without_standardization['Test data R^2 score'] = third_list
df_without_standardization['Training RMSE'] = fourth_l
df_without_standardization['Test RMSE'] = fifth_l
df_without_standardization['Number of features'] = f_list

```

```

[11]: df_linear = df_without_standardization.copy()
df_without_standardization

```

```

[11]:      Correlation threshold  Training data R^2 score  Test data R^2 score  \
0                0.33                1.000000        -13.371015
1                0.34                1.000000        -13.804982
2                0.35                1.000000        -17.508581
3                0.36                1.000000        -18.173919
4                0.37                1.000000        -22.385675
5                0.38                1.000000        -19.327214
6                0.39                1.000000        -20.111861
7                0.40                1.000000        -12.284709
8                0.41                1.000000        -10.243588
9                0.42                1.000000         -9.687742
10               0.43                1.000000         -7.821218
11               0.44                1.000000        -15.222724
12               0.45                1.000000        -84.187281
13               0.46                1.000000       -4974.152161
14               0.47                0.994782        -14.155849
15               0.48                0.964264         -0.408703
16               0.49                0.954139         -0.588182
17               0.50                0.923102         -1.032104
18               0.51                0.917111         -0.675424

```

|    |      |          |           |
|----|------|----------|-----------|
| 19 | 0.52 | 0.912945 | -0.526957 |
| 20 | 0.53 | 0.880879 | 0.256343  |
| 21 | 0.54 | 0.803171 | -0.304693 |
| 22 | 0.55 | 0.795778 | -0.418417 |
| 23 | 0.56 | 0.792267 | -0.277676 |
| 24 | 0.57 | 0.728309 | 0.001465  |
| 25 | 0.58 | 0.709122 | 0.031484  |
| 26 | 0.59 | 0.705202 | 0.048640  |
| 27 | 0.60 | 0.703033 | 0.036362  |
| 28 | 0.61 | 0.703033 | 0.036362  |
| 29 | 0.62 | 0.703033 | 0.036362  |
| 30 | 0.63 | 0.548666 | -0.190446 |

|    | Training RMSE | Test RMSE | Number of features |
|----|---------------|-----------|--------------------|
| 0  | 8.219094e-13  | 2.386128  | 527                |
| 1  | 1.369763e-13  | 2.421888  | 512                |
| 2  | 3.272271e-13  | 2.707925  | 487                |
| 3  | 3.216461e-13  | 2.756167  | 455                |
| 4  | 5.639714e-13  | 3.043863  | 435                |
| 5  | 4.267848e-13  | 2.837847  | 399                |
| 6  | 8.725490e-13  | 2.892100  | 377                |
| 7  | 2.246411e-12  | 2.294173  | 343                |
| 8  | 6.586269e-12  | 2.110584  | 290                |
| 9  | 1.298848e-12  | 2.057752  | 245                |
| 10 | 2.231542e-12  | 1.869452  | 203                |
| 11 | 2.739645e-12  | 2.535199  | 143                |
| 12 | 1.981758e-11  | 5.809483  | 111                |
| 13 | 1.475365e-10  | 44.396964 | 94                 |
| 14 | 6.924832e-02  | 2.450418  | 83                 |
| 15 | 1.812313e-01  | 0.747067  | 69                 |
| 16 | 2.053053e-01  | 0.793232  | 60                 |
| 17 | 2.658491e-01  | 0.897270  | 50                 |
| 18 | 2.760113e-01  | 0.814728  | 46                 |
| 19 | 2.828624e-01  | 0.777792  | 41                 |
| 20 | 3.308805e-01  | 0.542796  | 32                 |
| 21 | 4.253269e-01  | 0.718959  | 25                 |
| 22 | 4.332402e-01  | 0.749639  | 21                 |
| 23 | 4.369484e-01  | 0.711476  | 16                 |
| 24 | 4.997070e-01  | 0.628973  | 12                 |
| 25 | 5.170507e-01  | 0.619446  | 9                  |
| 26 | 5.205230e-01  | 0.613935  | 8                  |
| 27 | 5.224345e-01  | 0.617884  | 7                  |
| 28 | 5.224345e-01  | 0.617884  | 7                  |
| 29 | 5.224345e-01  | 0.617884  | 7                  |
| 30 | 6.440613e-01  | 0.686760  | 5                  |

[ ]:



## 2.2 Plots

```
[12]: plt.plot(df_without_standardization['Correlation threshold'],  
             df_without_standardization['Training data R^2 score'], label = "Training_  
             data R^2 score", marker='v')  
plt.plot(df_without_standardization['Correlation threshold'],  
         df_without_standardization['Test data R^2 score'], label = "Test data R^2_  
         score", marker='D')  
plt.legend()  
plt.xlabel('Correlation threshold')  
plt.ylabel('R^2 score')  
plt.ylim([0, 1])  
plt.show()
```

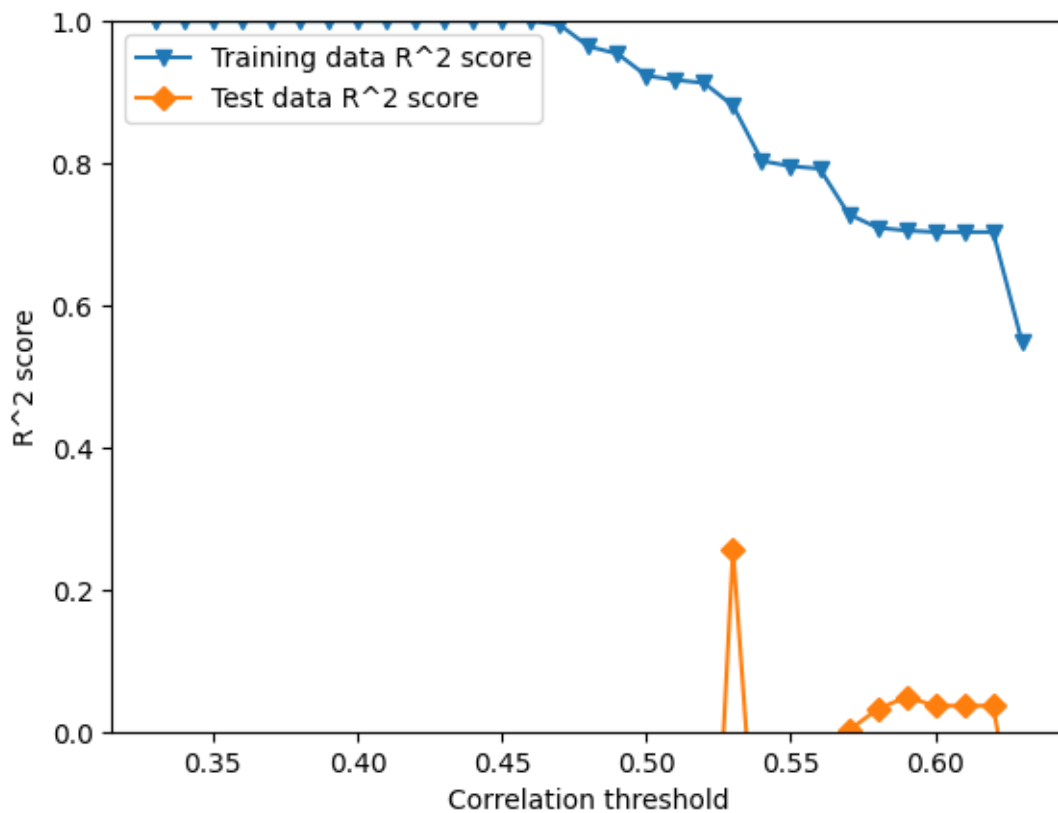

```
[13]: plt.plot(df_without_standardization['Correlation threshold'],  
             df_without_standardization['Number of features'], label = "Number of_  
             features", marker='.')  
plt.legend()  
plt.xlabel('Correlation threshold')  
plt.ylabel('Number of features')  
plt.show()
```

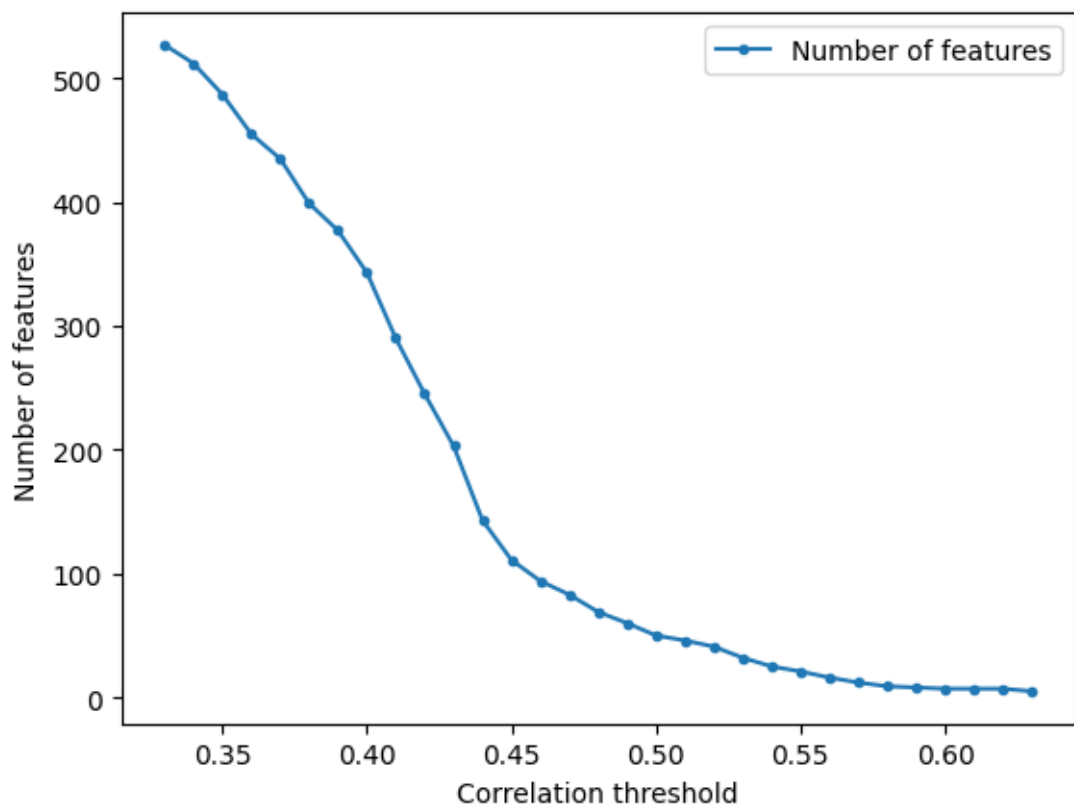

[ ]:

## 2.3 Decision Tree

```
[14]: without_standardization, train_r2_, test_r2_, hist1, hist2, target_column_name,
      ↪ training_data_RMSE, test_data_RMSE = pred_model.
      ↪ prepare_data_and_create_model(molecular_descriptors_df=data,
      ↪
      ↪         correlation_threshold=0.50,
      ↪
      ↪         standardization=False,
      ↪
      ↪         model_type='DecisionTreeRegressor',
      ↪
      ↪         max_depth=5,
      ↪
      ↪         target_column_name = target,
      ↪
      ↪         random_state=random_state,
```

```

↪          train_test_split_=True,
↪          verbose=True)

```

I am not doing standardization...

|   | molecular descriptor name |  |
|---|---------------------------|--|
| 0 | AATSOZ                    |  |
| 1 | AATSOare                  |  |
| 2 | AATSOd                    |  |
| 3 | AATSOdv                   |  |
| 4 | AATSOi                    |  |

  

|   | molecular descriptor name | corr_value |
|---|---------------------------|------------|
| 0 | AATSOZ                    | 0.018677   |
| 1 | AATSOare                  | -0.341313  |
| 2 | AATSOd                    | -0.123443  |
| 3 | AATSOdv                   | -0.265670  |
| 4 | AATSOi                    | -0.428929  |

  

|   | molecular descriptor name | corr_value | absolute correlation value |
|---|---------------------------|------------|----------------------------|
| 0 | AATSOZ                    | 0.018677   | 0.018677                   |
| 1 | AATSOare                  | -0.341313  | 0.341313                   |
| 2 | AATSOd                    | -0.123443  | 0.123443                   |
| 3 | AATSOdv                   | -0.265670  | 0.265670                   |
| 4 | AATSOi                    | -0.428929  | 0.428929                   |

  

|     | molecular descriptor name | corr_value | absolute correlation value |
|-----|---------------------------|------------|----------------------------|
| 15  | AATS1i                    | -0.561620  | 0.561620                   |
| 113 | AATSC1c                   | 0.565682   | 0.565682                   |
| 125 | AATSC2c                   | -0.543393  | 0.543393                   |
| 221 | AETA_eta_R                | -0.515778  | 0.515778                   |
| 224 | AMID_C                    | 0.532458   | 0.532458                   |

  

|     | molecular descriptor name | corr_value | absolute correlation value |
|-----|---------------------------|------------|----------------------------|
| 15  | AATS1i                    | -0.561620  | 0.561620                   |
| 113 | AATSC1c                   | 0.565682   | 0.565682                   |
| 125 | AATSC2c                   | -0.543393  | 0.543393                   |
| 221 | AETA_eta_R                | -0.515778  | 0.515778                   |
| 224 | AMID_C                    | 0.532458   | 0.532458                   |

The model used is: DecisionTree...

Return the coefficient of determination of the prediction:

0.06924294432206701

R<sup>2</sup> score: 0.942320762458848

Correlation coefficient: 0.9707320755279739

Test data - unseen during training:

R<sup>2</sup> score: 0.06924294432206701

Correlation coefficient: 0.26314054100815976

```

[7.1833148  6.69792506 5.69688833 6.24345954 7.8569852  5.69688833
 7.1833148  5.69688833 5.69688833 5.69688833 5.69688833 5.69688833
 6.6767479  6.24345954 7.15366289 6.84065953]

```

8 6.159455

```

110    6.065502
69     5.552842
95     5.200659
11     7.250264
104    6.000000
52     6.823909
112    6.853872
101    5.000000
50     5.769551
100    6.136677
103    6.000000
21     6.398375
60     5.537602
84     7.002177
39     6.638272
Name: LoVo/DX, dtype: float64
Training Root Mean Square Error: 0.2302436543011823
Testing Root Mean Square Error: 0.6072510293132874

```

```

[15]: print(target_column_name+str('_transformed'))
      print(hist1[target_column_name].hist())

```

```

LoVo/DX_transformed
AxesSubplot(0.125,0.11;0.775x0.77)

```

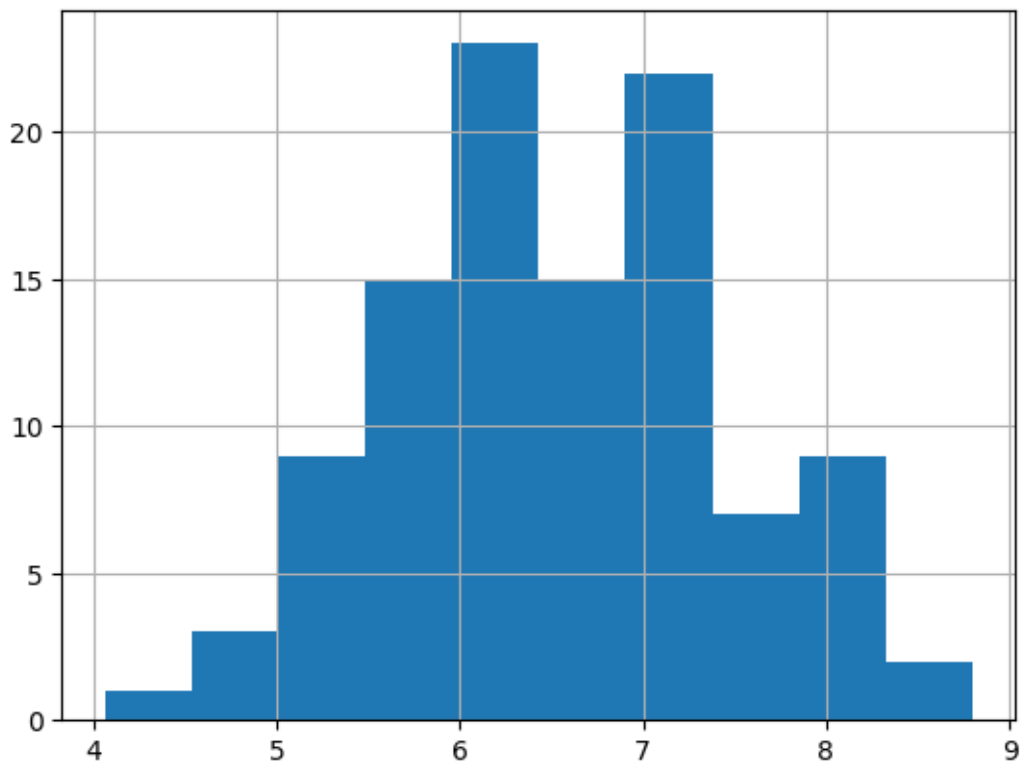

```
[16]: with_standardization, train_r2_, test_r2_, hist1, hist2, target_column_name,
      ↪ training_data_RMSE, test_data_RMSE = pred_model.
      ↪ prepare_data_and_create_model(molecular_descriptors_df=data,
      ↪
      ↪         correlation_threshold=0.50,
      ↪
      ↪         standardization=True,
      ↪
      ↪         model_type='DecisionTreeRegressor',
      ↪
      ↪         max_depth=5,
      ↪
      ↪         target_column_name = target,
      ↪
      ↪         random_state=random_state,
      ↪
      ↪         train_test_split_=True,
      ↪
      ↪         verbose=True)
```

I am doing standardization...

|   | molecular descriptor name |  |
|---|---------------------------|--|
| 0 | AATSOZ                    |  |
| 1 | AATSOare                  |  |
| 2 | AATSOd                    |  |
| 3 | AATSOdv                   |  |
| 4 | AATSOi                    |  |

  

|   | molecular descriptor name | corr_value |
|---|---------------------------|------------|
| 0 | AATSOZ                    | 0.018677   |
| 1 | AATSOare                  | -0.341313  |
| 2 | AATSOd                    | -0.123443  |
| 3 | AATSOdv                   | -0.265670  |
| 4 | AATSOi                    | -0.428929  |

  

|   | molecular descriptor name | corr_value | absolute correlation value |
|---|---------------------------|------------|----------------------------|
| 0 | AATSOZ                    | 0.018677   | 0.018677                   |
| 1 | AATSOare                  | -0.341313  | 0.341313                   |
| 2 | AATSOd                    | -0.123443  | 0.123443                   |
| 3 | AATSOdv                   | -0.265670  | 0.265670                   |
| 4 | AATSOi                    | -0.428929  | 0.428929                   |

  

|     | molecular descriptor name | corr_value | absolute correlation value |
|-----|---------------------------|------------|----------------------------|
| 15  | AATS1i                    | -0.561620  | 0.561620                   |
| 113 | AATSC1c                   | 0.565682   | 0.565682                   |
| 125 | AATSC2c                   | -0.543393  | 0.543393                   |
| 221 | AETA_eta_R                | -0.515778  | 0.515778                   |
| 224 | AMID_C                    | 0.532458   | 0.532458                   |

|     | molecular descriptor name | corr_value | absolute correlation value |
|-----|---------------------------|------------|----------------------------|
| 15  | AATS1i                    | -0.561620  | 0.561620                   |
| 113 | AATSC1c                   | 0.565682   | 0.565682                   |
| 125 | AATSC2c                   | -0.543393  | 0.543393                   |
| 221 | AETA_eta_R                | -0.515778  | 0.515778                   |
| 224 | AMID_C                    | 0.532458   | 0.532458                   |

The model used is: DecisionTree...

Return the coefficient of determination of the prediction:

0.06924294432206701

R<sup>2</sup> score: 0.942320762458848

Correlation coefficient: 0.9707320755279739

Test data - unseen during training:

R<sup>2</sup> score: 0.06924294432206701

Correlation coefficient: 0.26314054100815976

[7.1833148 6.69792506 5.69688833 6.24345954 7.8569852 5.69688833

7.1833148 5.69688833 5.69688833 5.69688833 5.69688833 5.69688833

6.6767479 6.24345954 7.15366289 6.84065953]

8 6.159455

110 6.065502

69 5.552842

95 5.200659

11 7.250264

104 6.000000

52 6.823909

112 6.853872

101 5.000000

50 5.769551

100 6.136677

103 6.000000

21 6.398375

60 5.537602

84 7.002177

39 6.638272

Name: LoVo/DX, dtype: float64

Training Root Mean Square Error: 0.2302436543011823

Testing Root Mean Square Error: 0.6072510293132874

## 2.4 Search inside correlation space

```
[17]: step = 0.01
initial_step = corr_low
last_step = corr_high
first_list = [x / 100.0 for x in range(int(initial_step*100),
    ↪int(last_step*100), int(step*100))]
max_depth = [range(2, 30, 1)]
corr_th = []
second_list = []
```

```

third_list = []
fourth_l = []
fifth_l = []
f_list = []
fif_list = []
for i in first_list:
    for depth in max_depth[0]:

        without_standardization, train_r2, test_r2, _, h_, target_column_name,
        ↪ training_data_RMSE, test_data_RMSE = pred_model.
        ↪ prepare_data_and_create_model(molecular_descriptors_df=data,

        ↪ correlation_threshold=i,

        ↪ standardization=False,

        ↪ model_type='DecisionTreeRegressor',

        ↪ max_depth=depth,

        ↪ target_column_name = target,

        ↪ random_state=random_state,

        ↪ train_test_split_=True,

        ↪ verbose=False)
        corr_th.append(i)
        second_list.append(train_r2)
        third_list.append(test_r2)
        fourth_l.append(training_data_RMSE)
        fifth_l.append(test_data_RMSE)
        f_list.append(len(h_))
        fif_list.append(depth)

```

```

[18]: df_without_standardization = pd.DataFrame(data=corr_th, columns=["Correlation_
        ↪ threshold"])
df_without_standardization['Training data R^2 score'] = second_list
df_without_standardization['Test data R^2 score'] = third_list
df_without_standardization['Training RMSE'] = fourth_l
df_without_standardization['Test RMSE'] = fifth_l
df_without_standardization['Number of features'] = f_list
df_without_standardization['Depth number'] = fif_list

```

```

[19]: df_decision_tree = df_without_standardization.copy()

```

```
#df_without_standardization.to_excel('../Data/
↳A549_Decision_tree_rs_'+str(random_state)+'.xlsx')
```

## 2.5 Plots

```
[ ]: corre_list = [x / 100.0 for x in range(int(initial_step*100),
↳int(last_step*100), int(0.01*100))]
for element in corre_list:
    element_ =
    ↳df_without_standardization[df_without_standardization['Correlation_
    ↳threshold'] == float(element)]
    plt.plot(element_['Depth number'], element_['Training data R^2 score'],
    ↳label = "Training data R^2 score", marker='v')
    plt.plot(element_['Depth number'], element_['Test data R^2 score'], label =
    ↳"Test data R^2 score", marker='D')
    plt.legend()
    plt.xlabel('Depth number -> correlation threshold: '+str(element)+' \n
    ↳Number of features: '+str(element_['Number of features'].iloc[0]),
    ↳fontweight='bold')
    plt.xlim(max(element_['Depth number'])+1, min(element_['Depth number'])-1)
    plt.ylabel('R^2 score')
    plt.ylim([0, 1])
    plt.rc('grid', linestyle="-. ", color='black')
    plt.grid(True)
    plt.show()
```



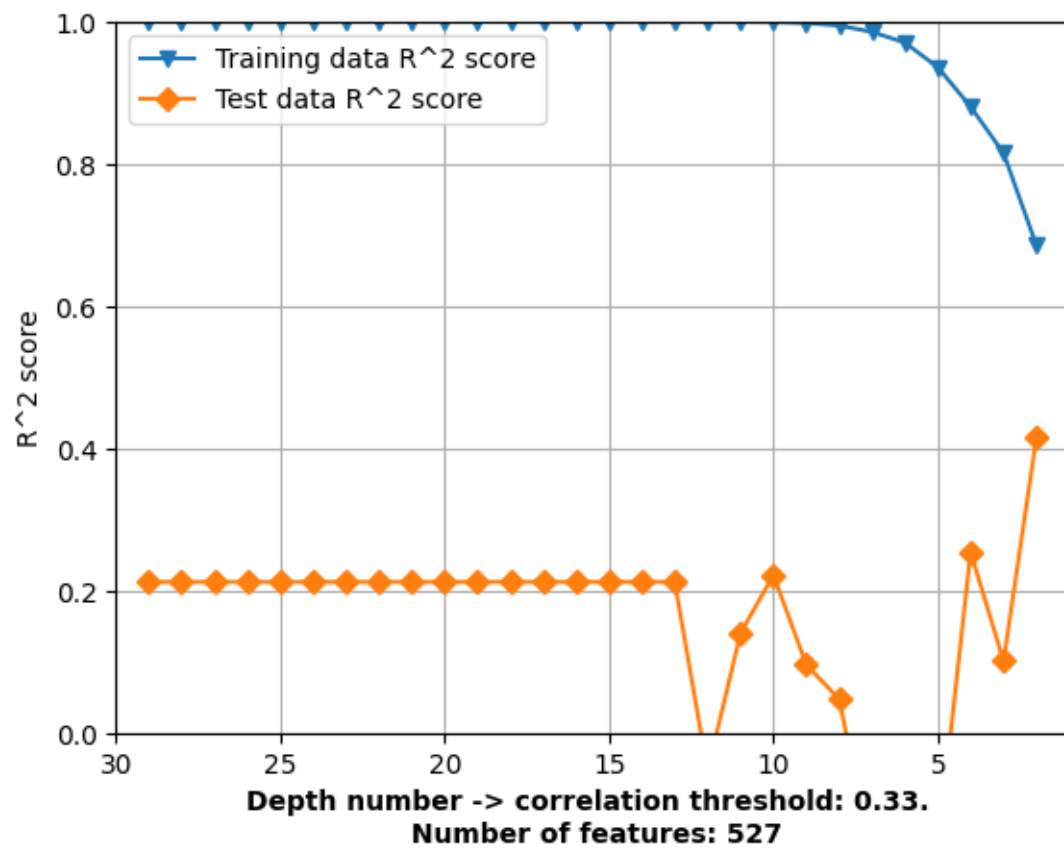

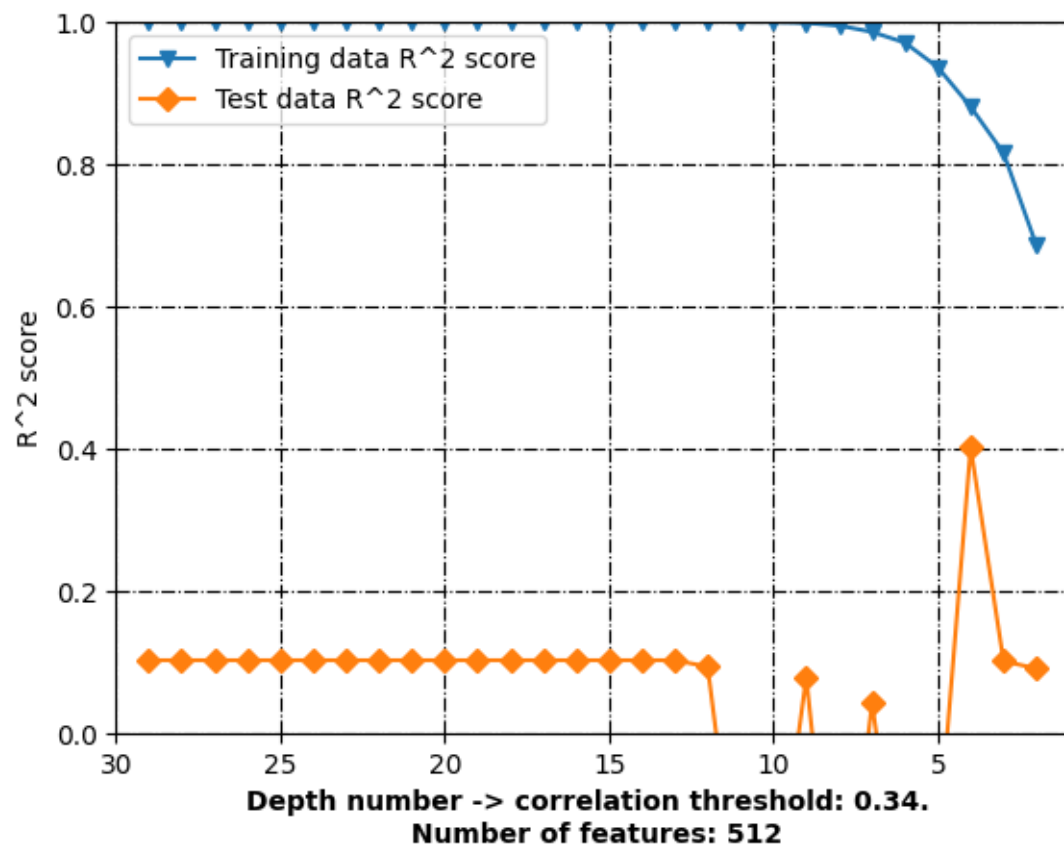

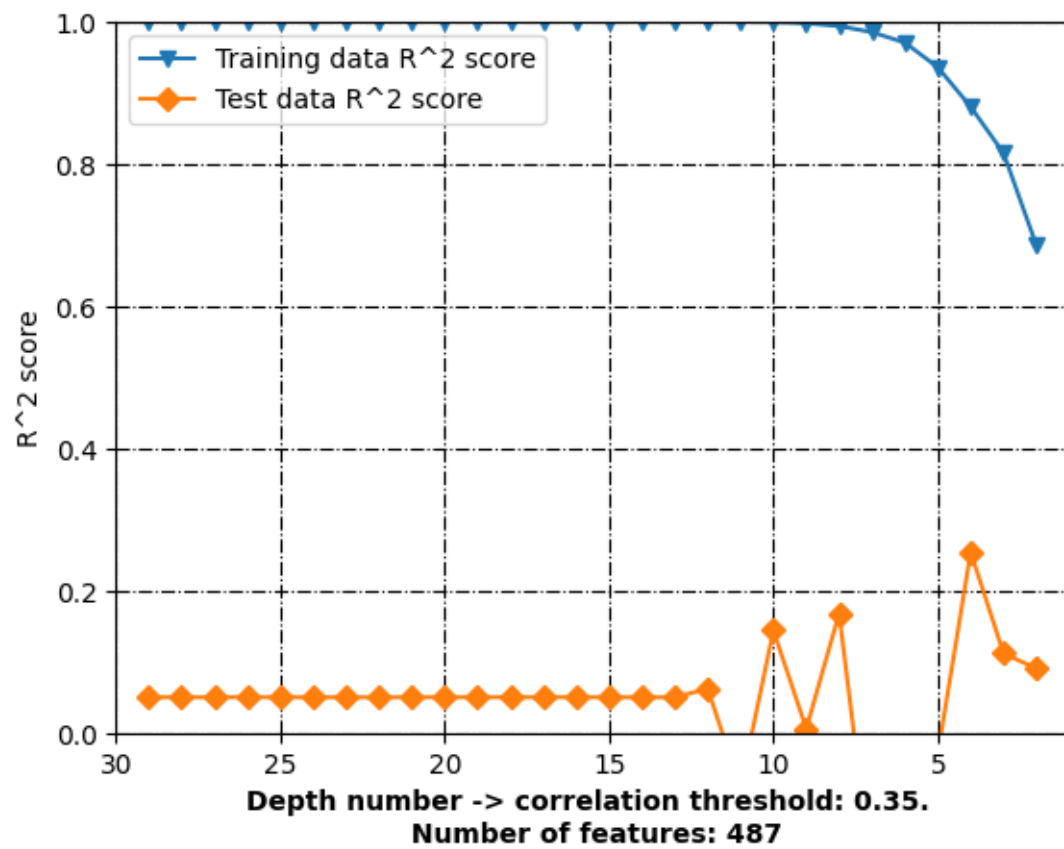

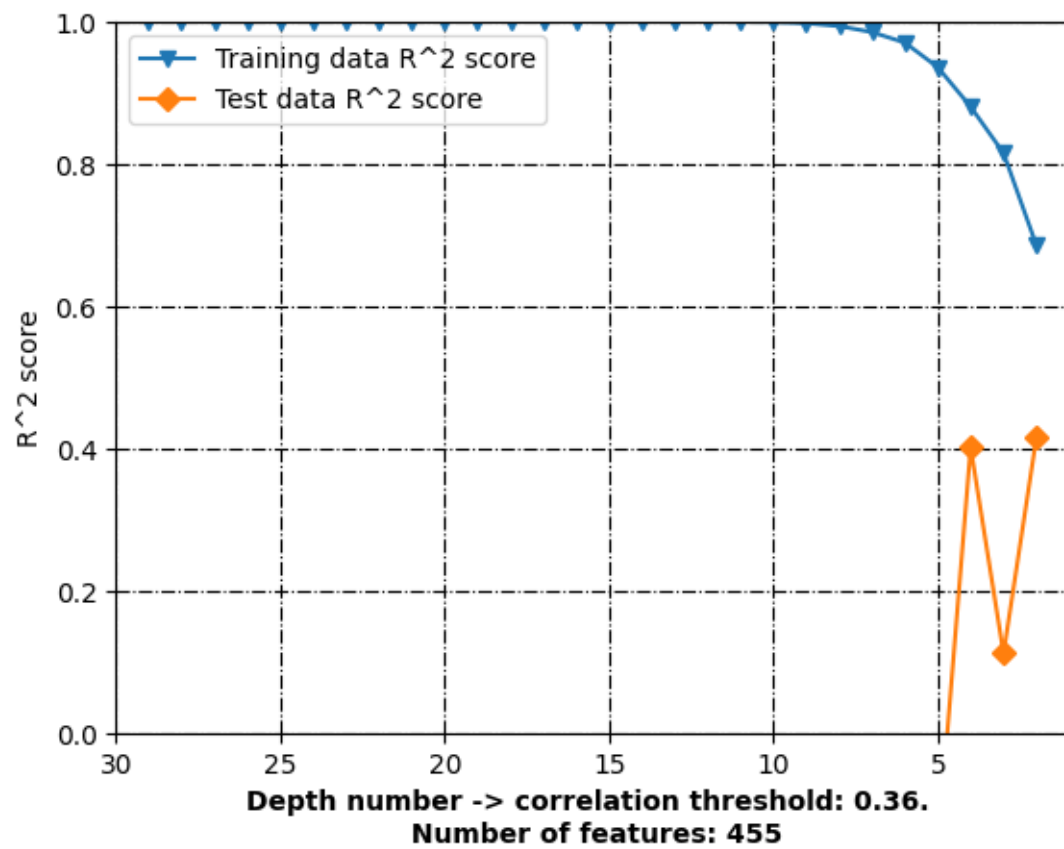

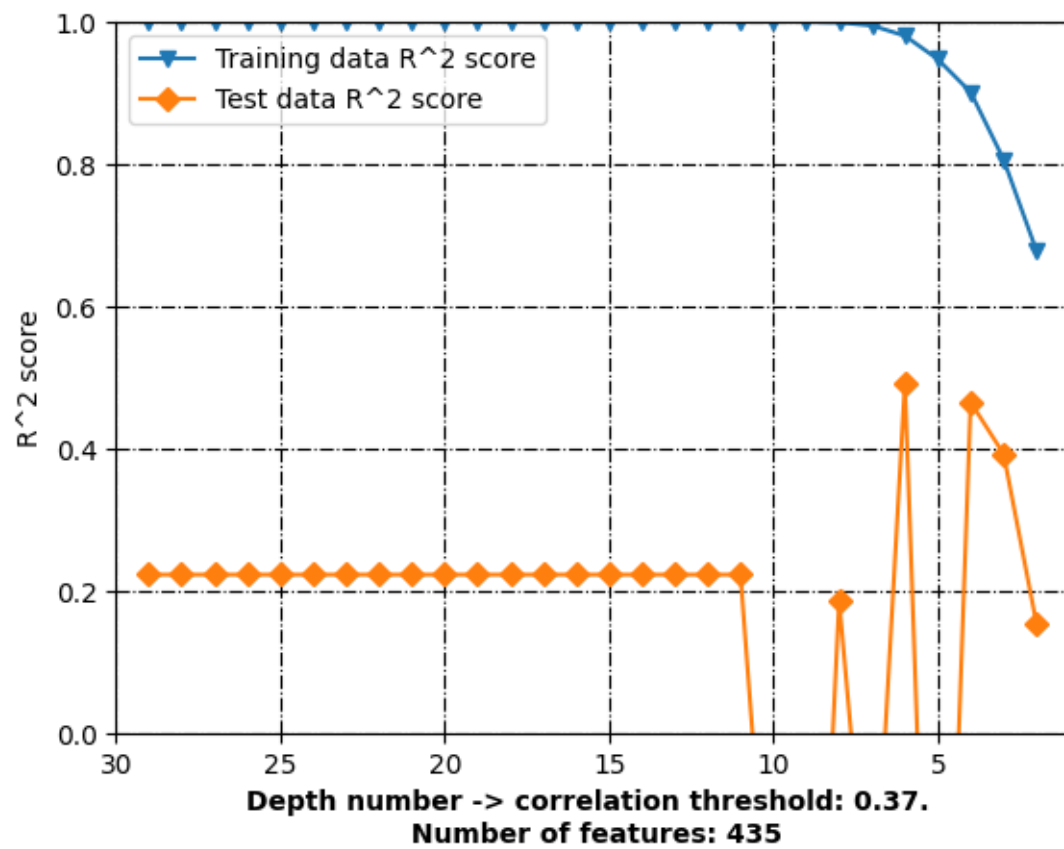

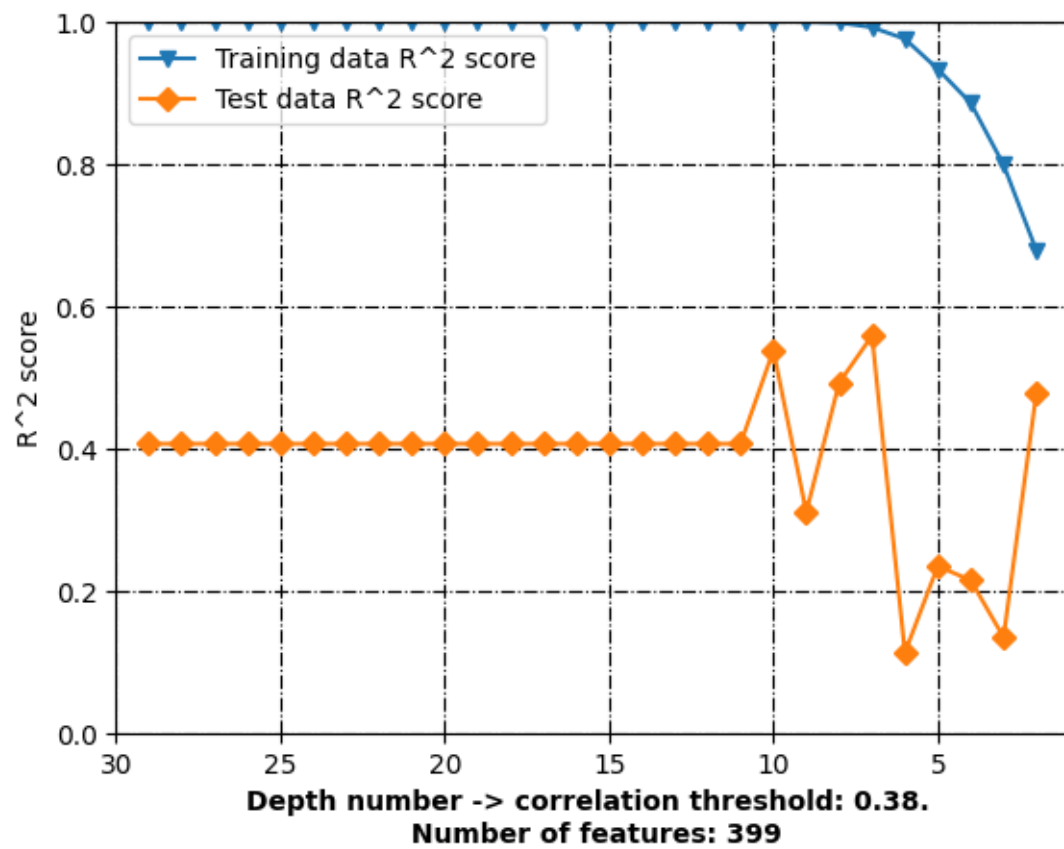

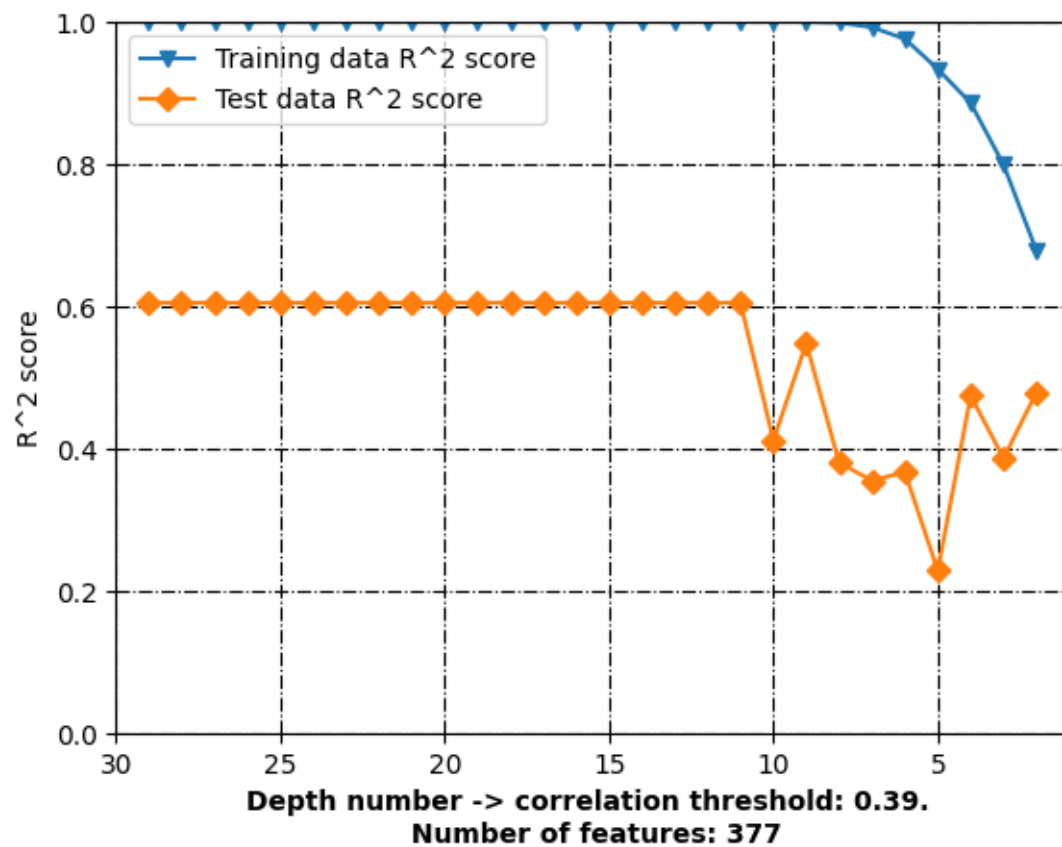

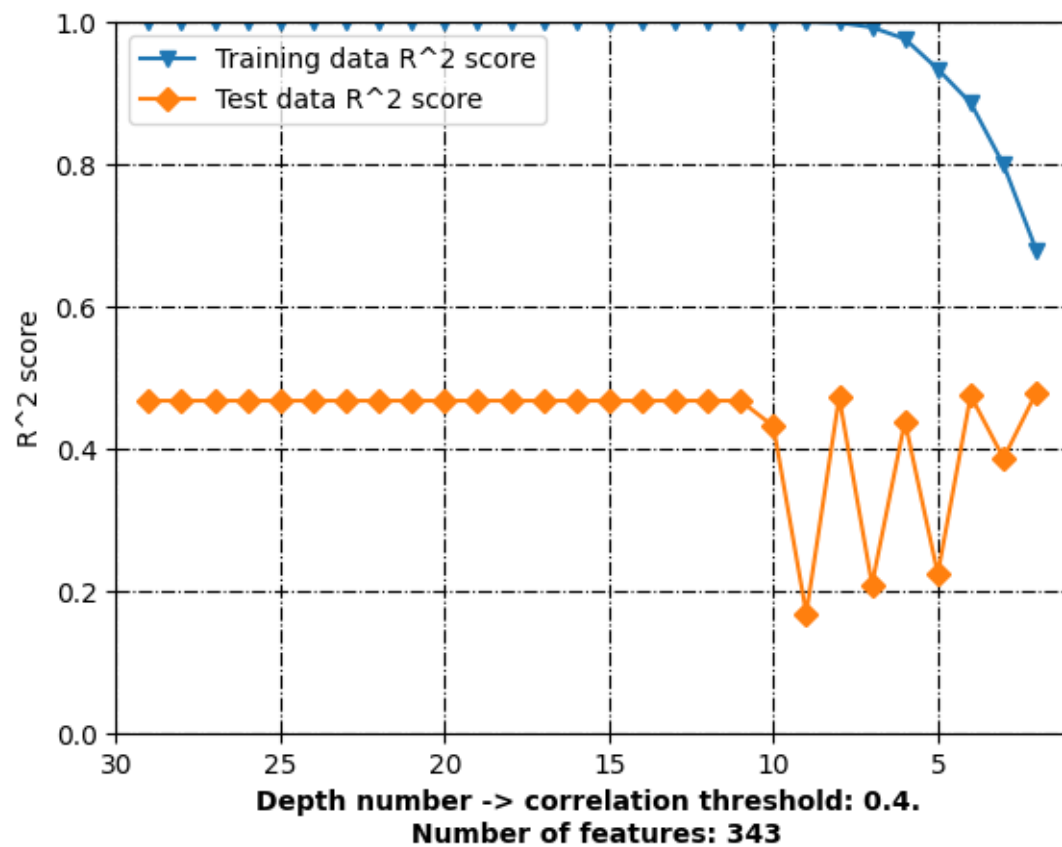



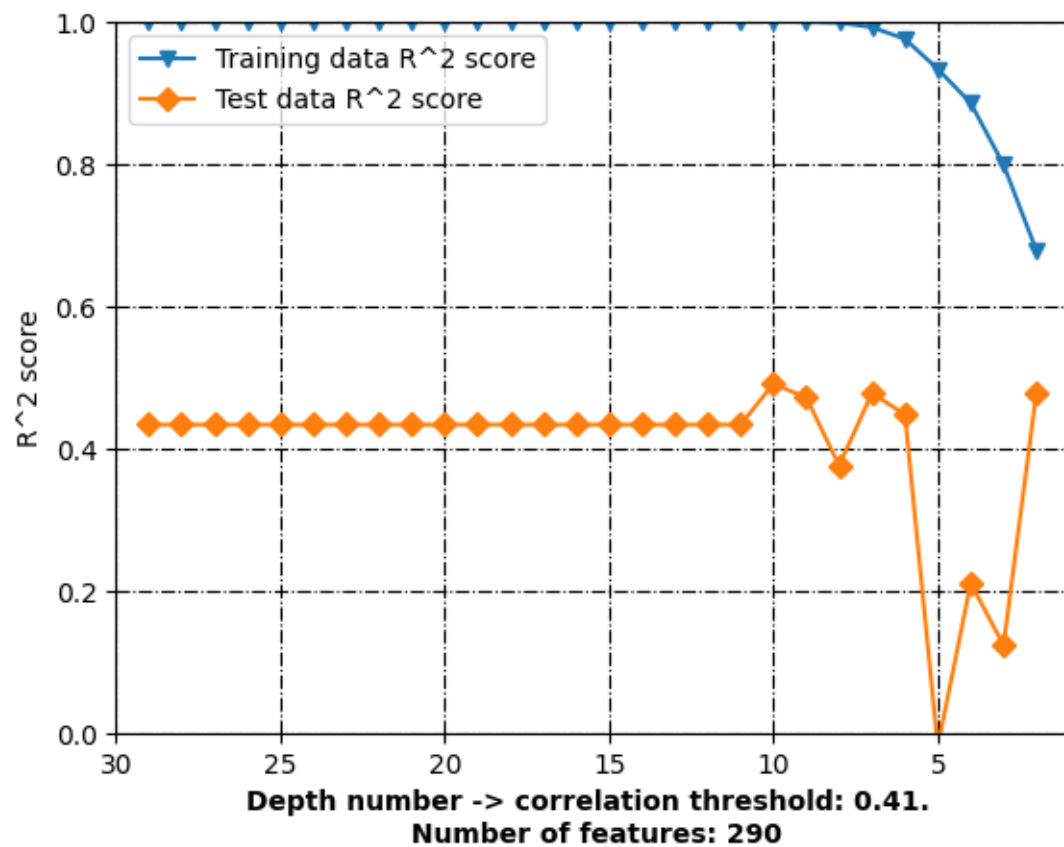

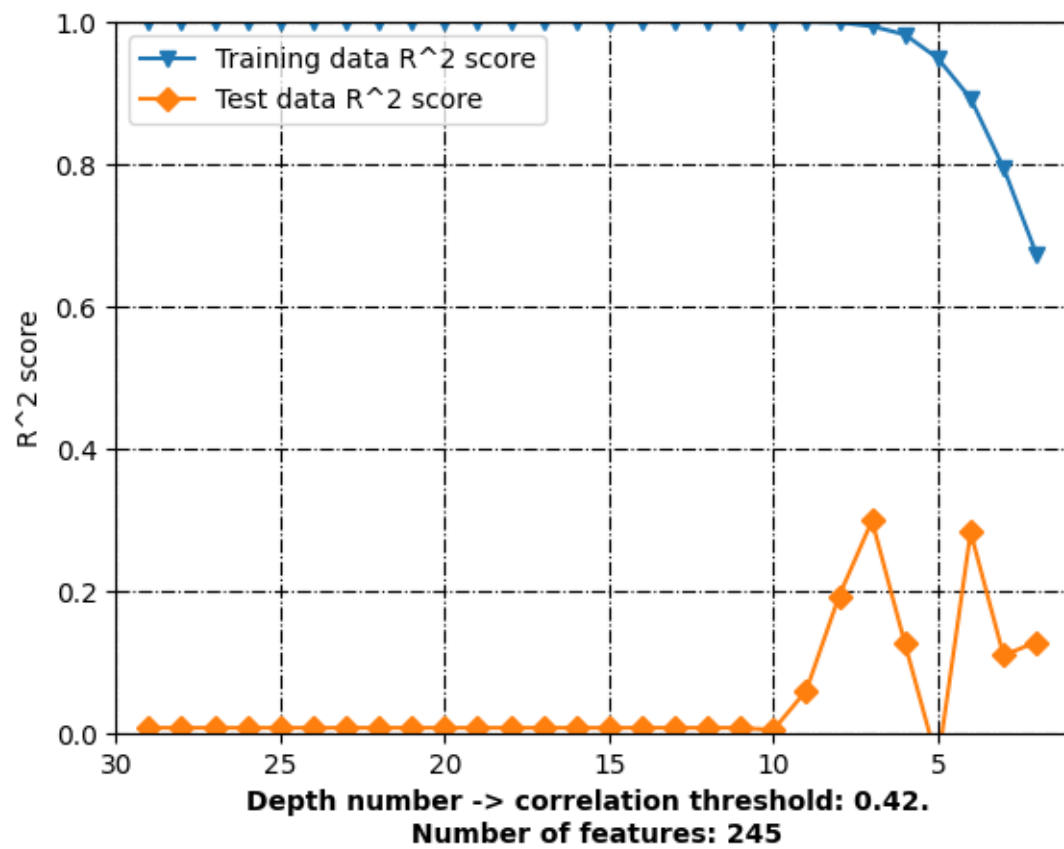

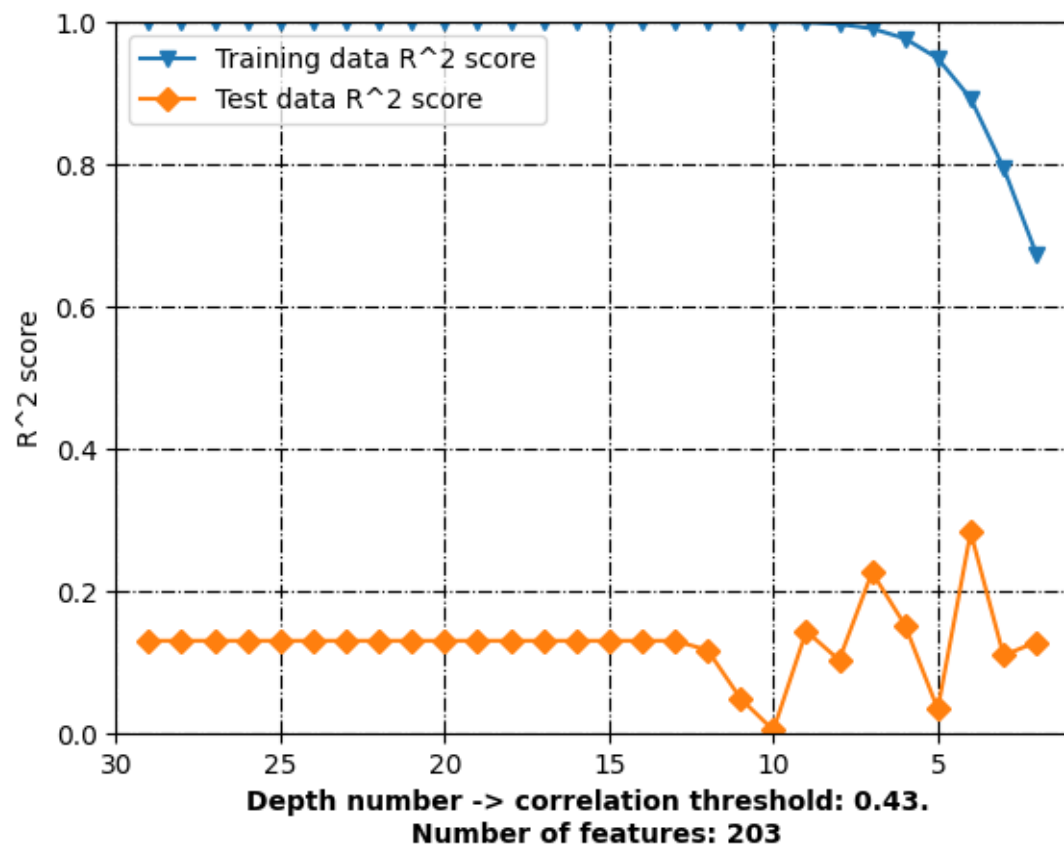

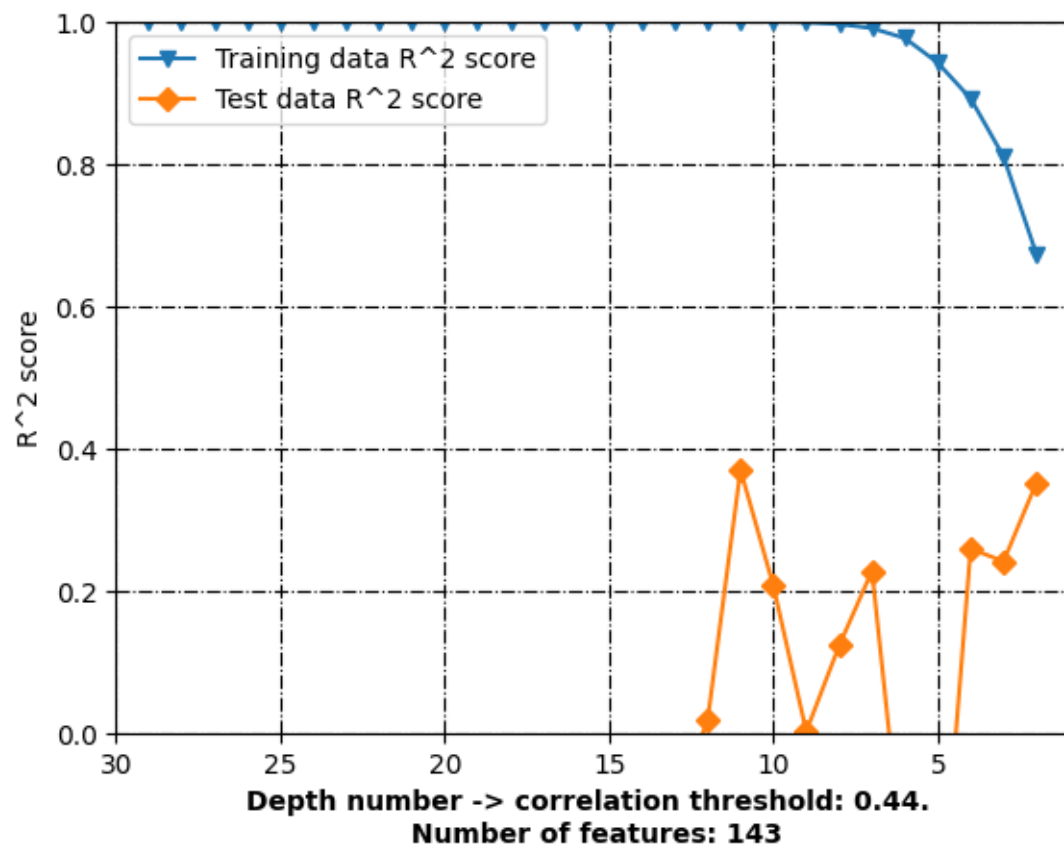

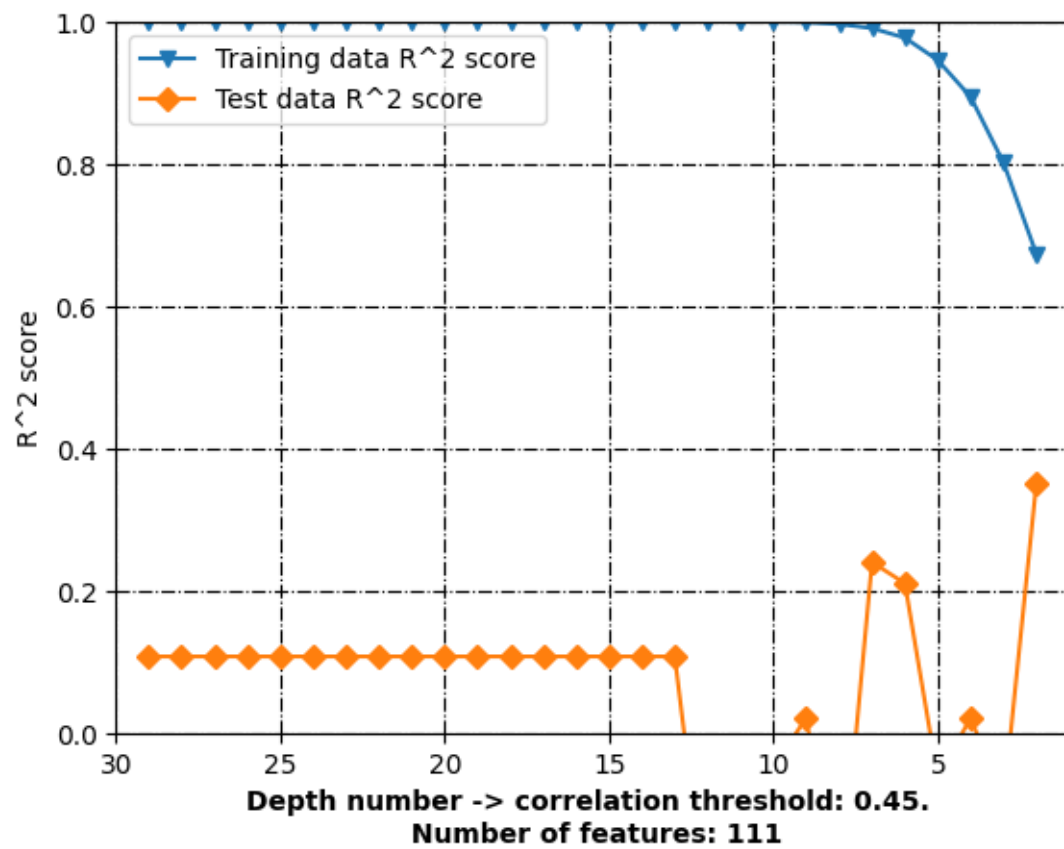

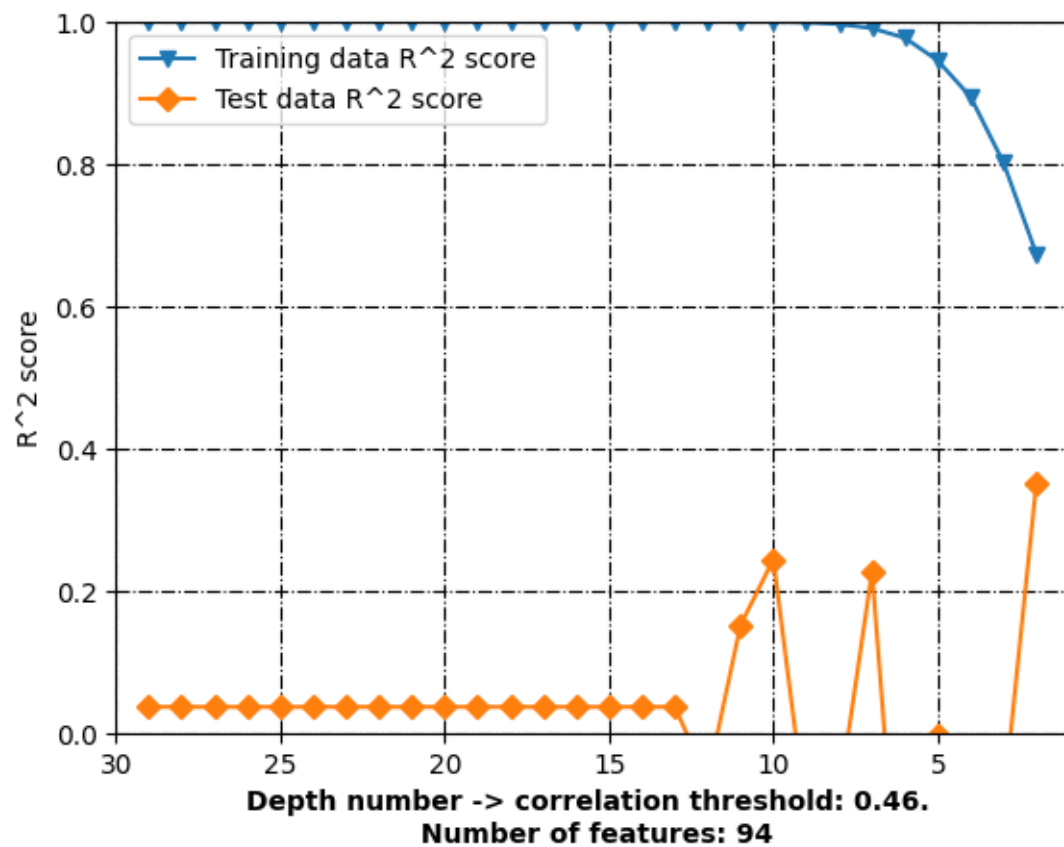

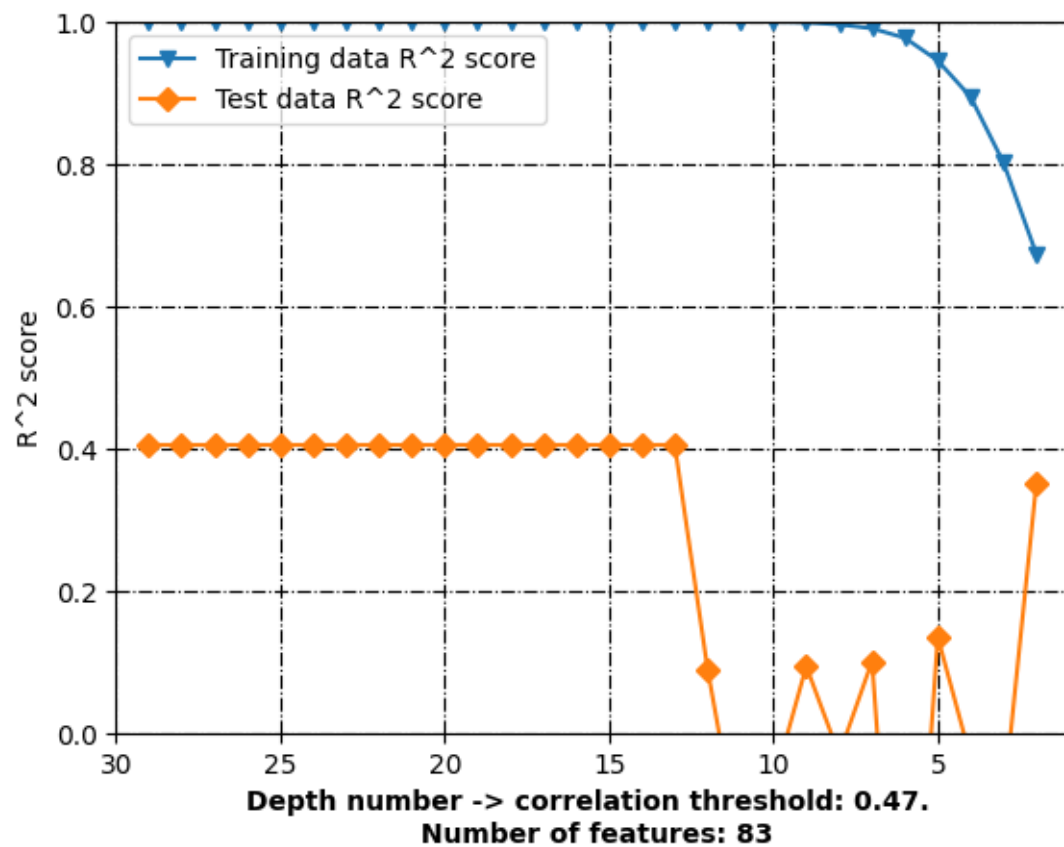

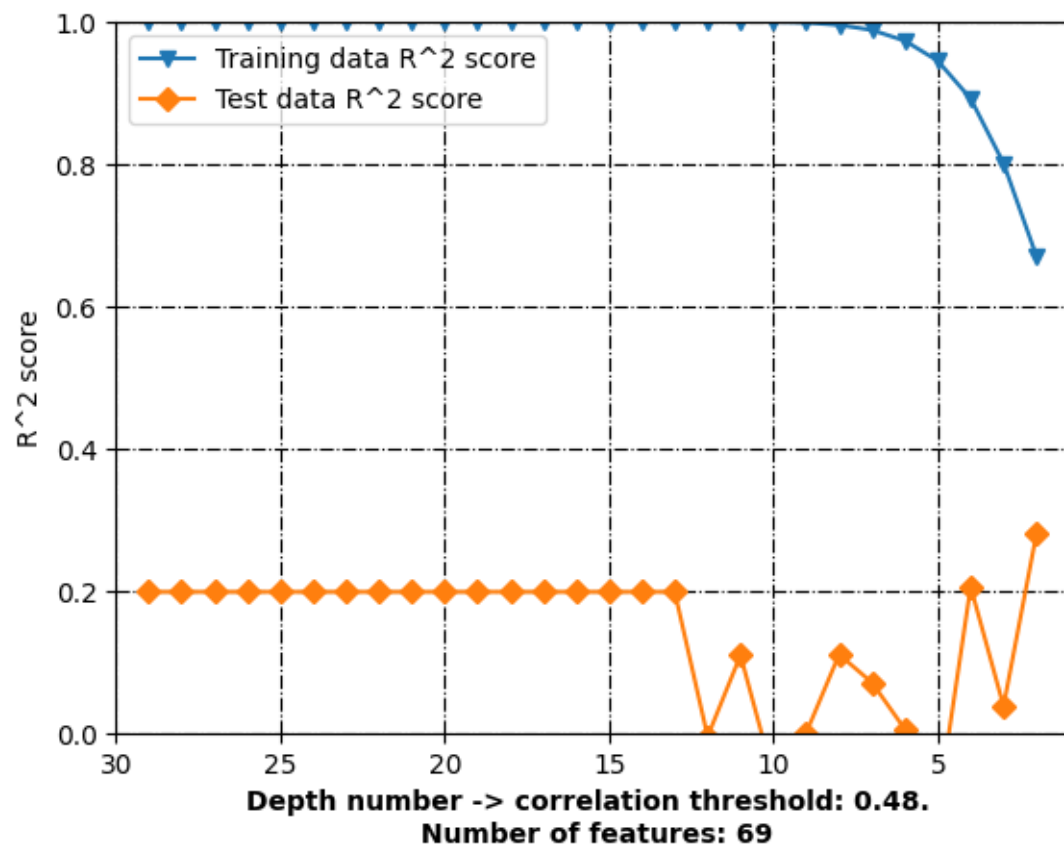



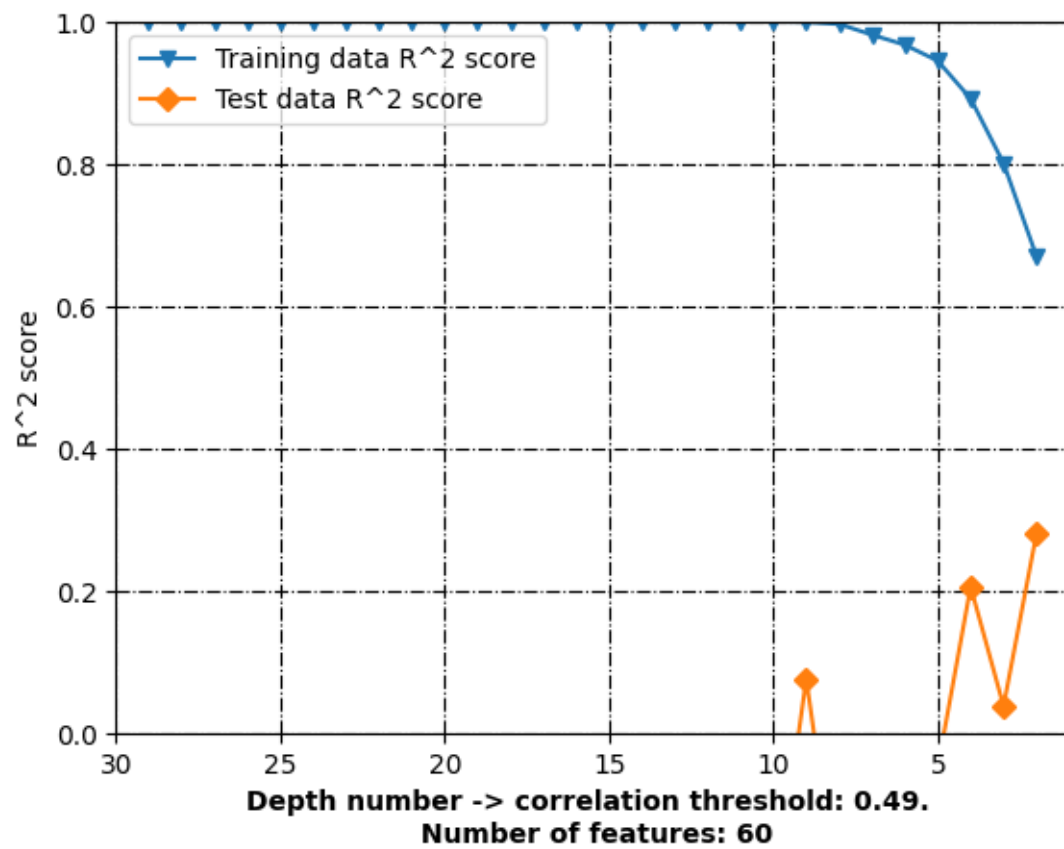

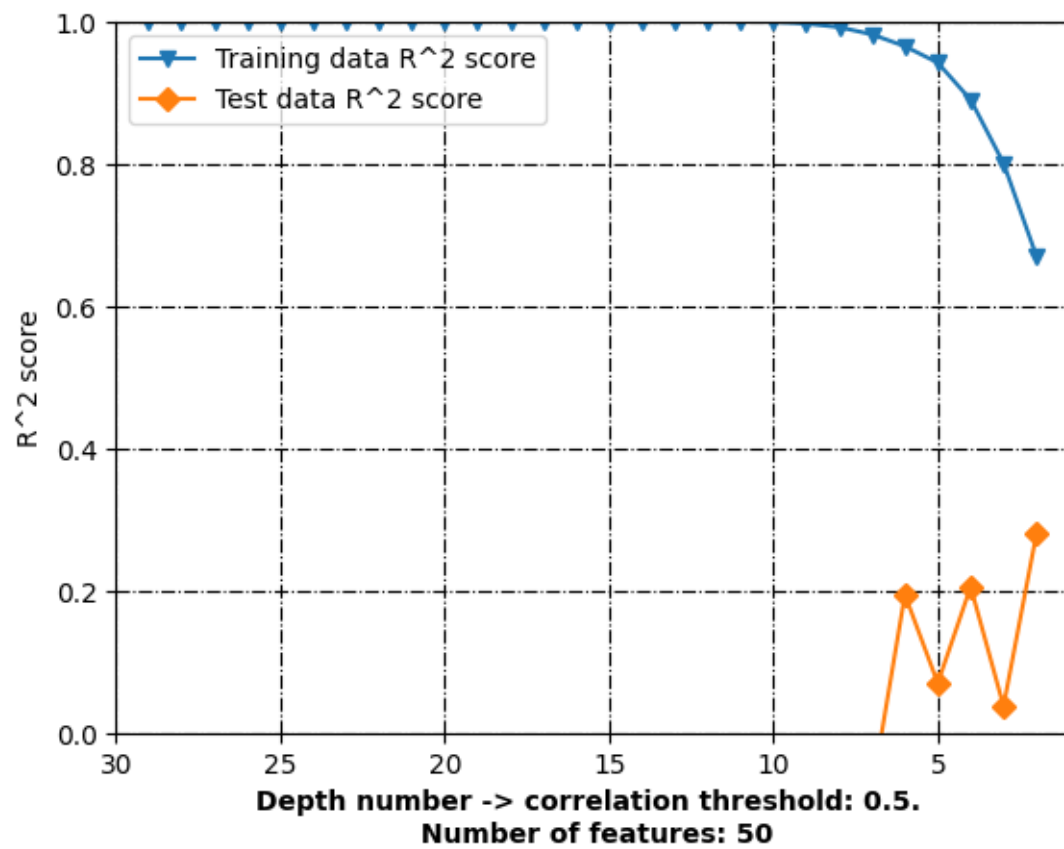

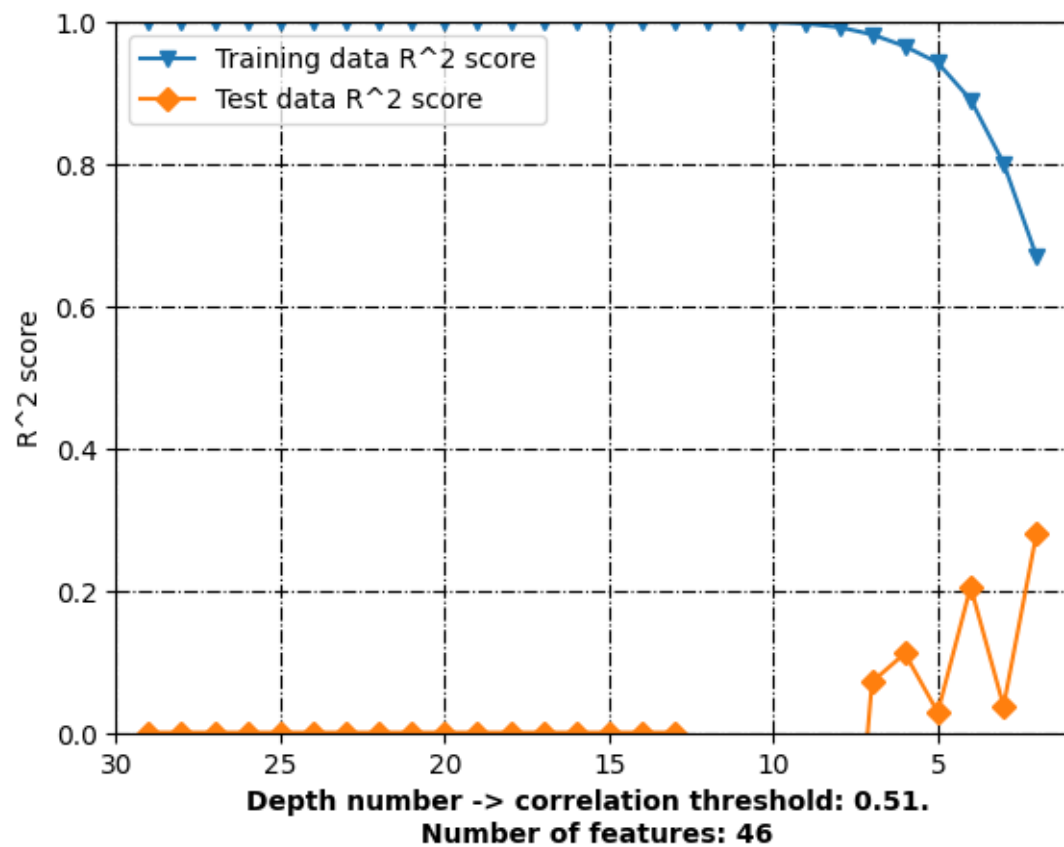

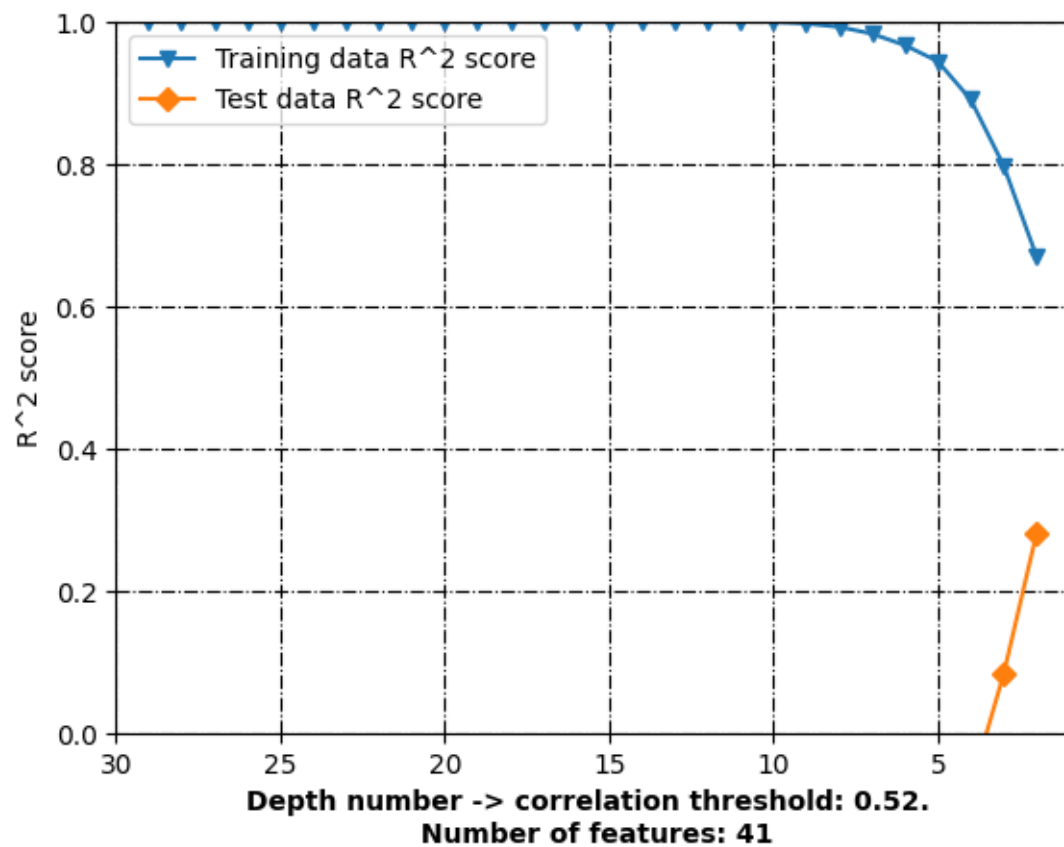

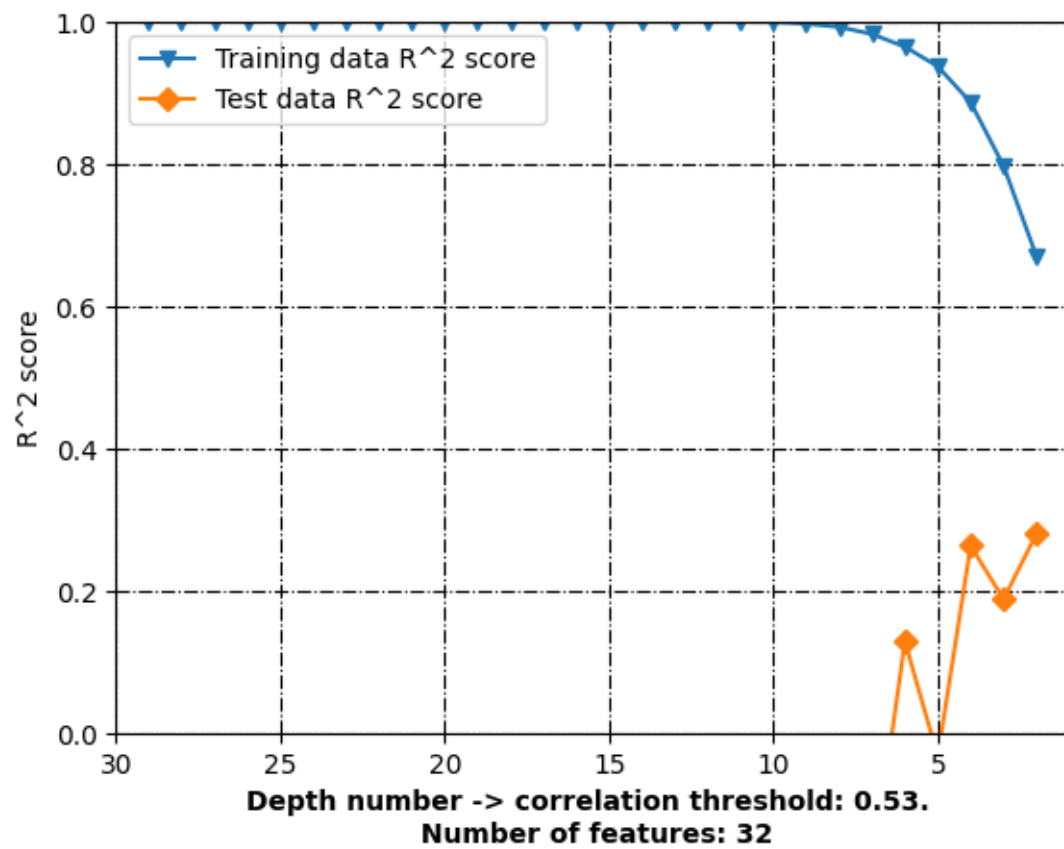

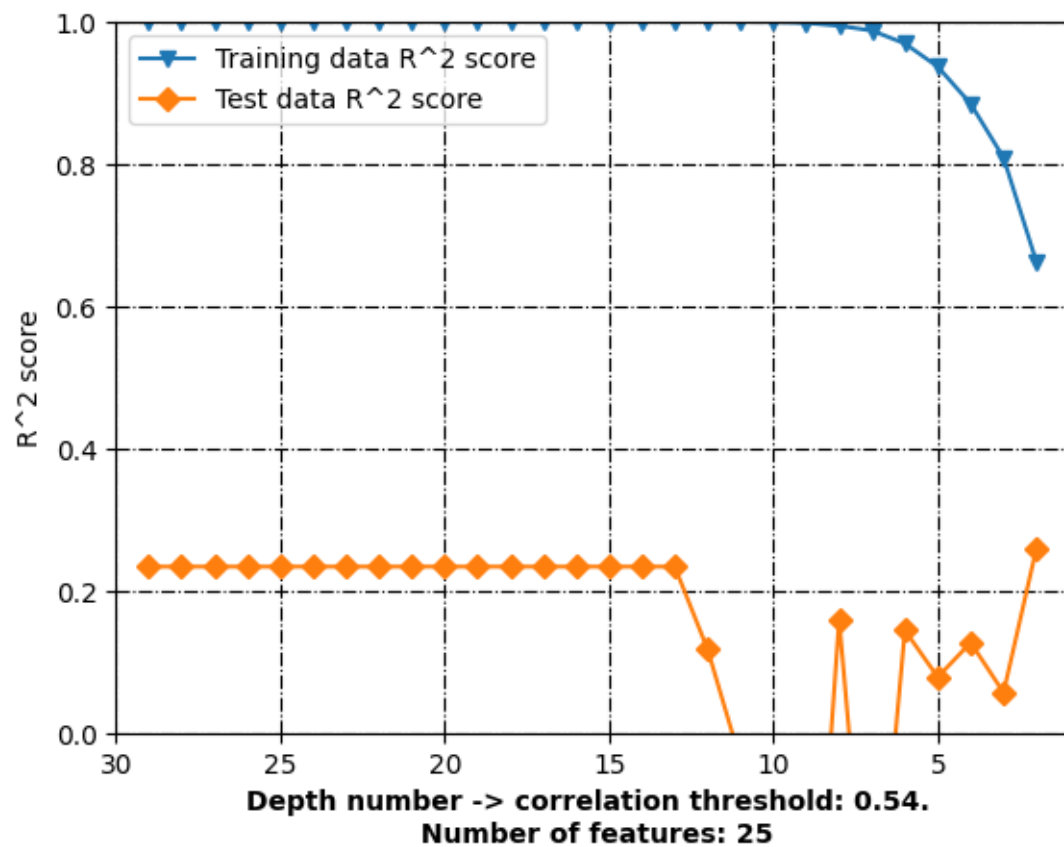

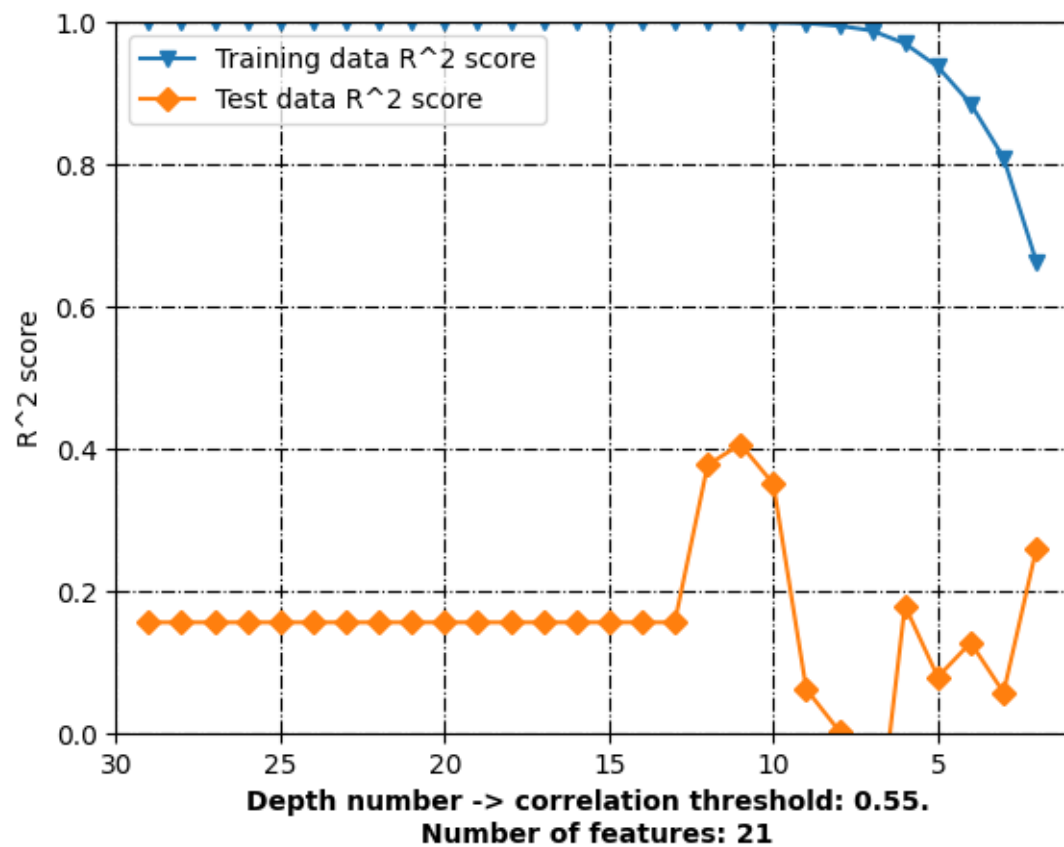

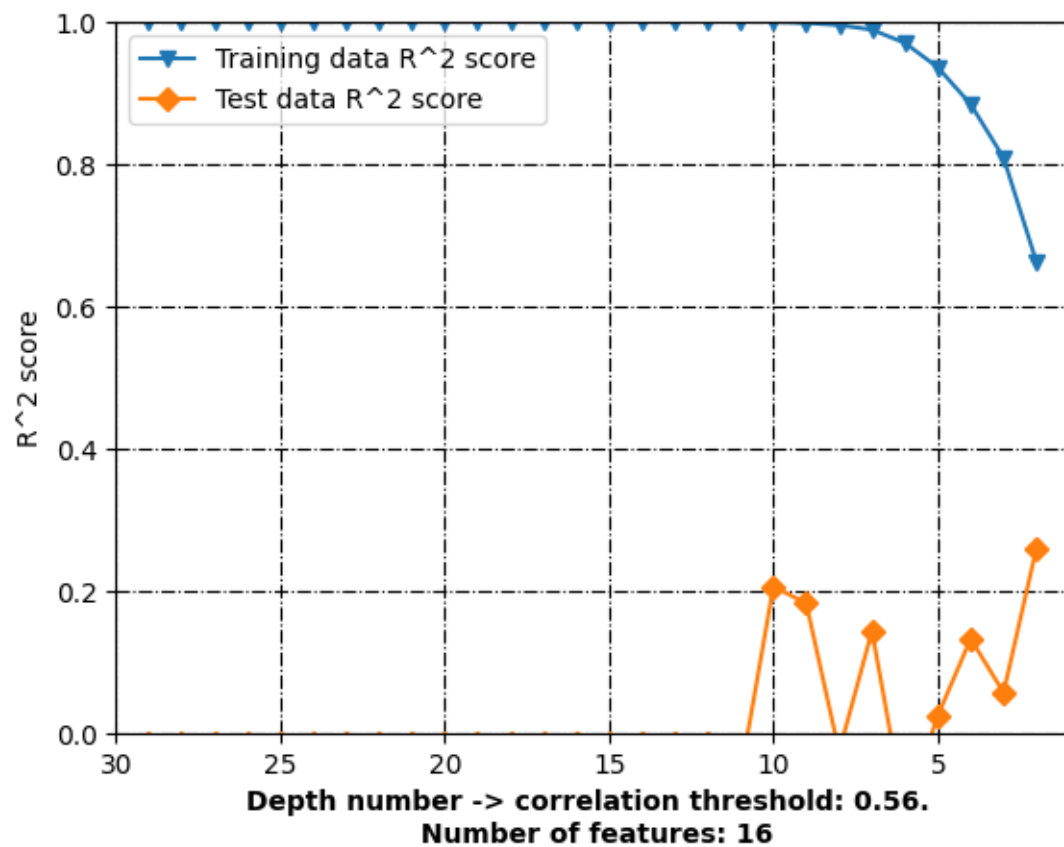



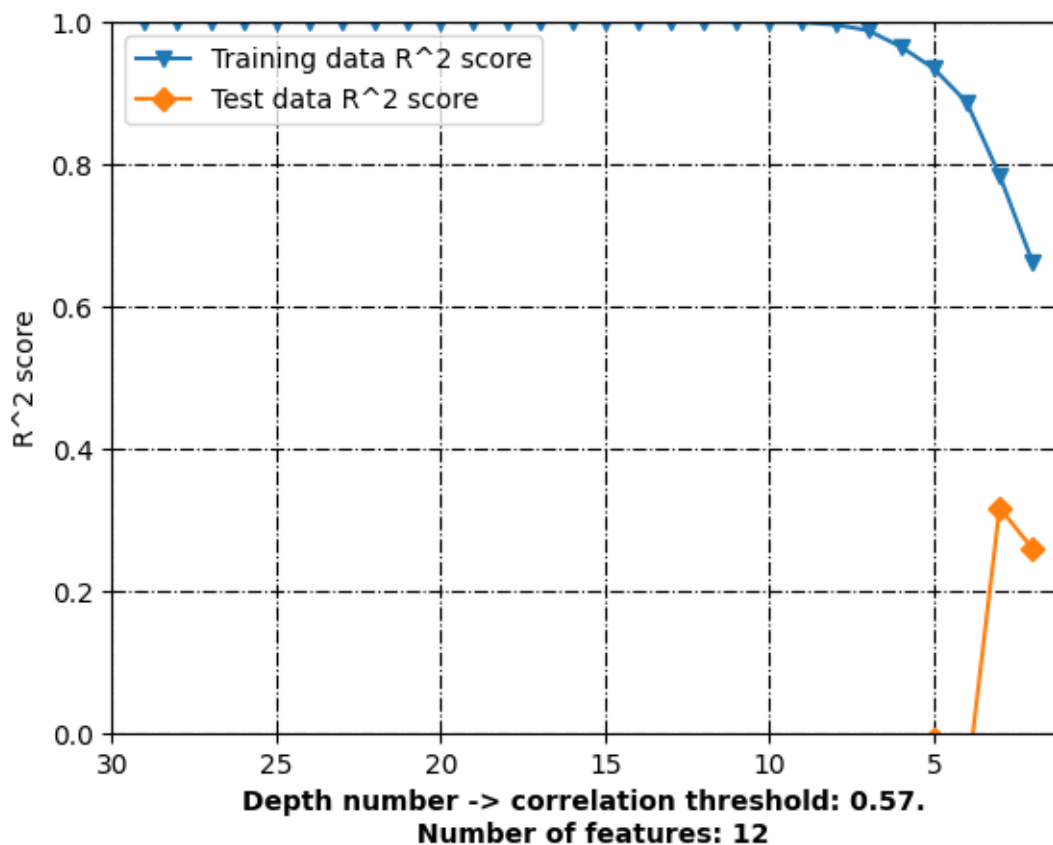

```
[ ]: plt.plot(df_without_standardization['Correlation threshold'],  
             df_without_standardization['Number of features'], label = "Number of  
             features", marker='.')  
plt.legend()  
plt.xlabel('Correlation threshold')  
plt.ylabel('Number of features')  
plt.show()
```

```
[ ]:
```

### 3 Random Forest

```
[ ]: without_standardization, train_r2_, test_r2_, hist1, hist2, target_column_name,  
     training_data_RMSE, test_data_RMSE = pred_model.  
     prepare_data_and_create_model(molecular_descriptors_df=data,  
                                   correlation_threshold=0.50,  
                                   standardization=False,
```

```

↪         model_type='RandomForestRegressor',
↪
↪         n_estimators_=12,
↪
↪         target_column_name = target,
↪
↪         random_state=random_state,
↪
↪         train_test_split_=True,
↪
↪         verbose=True)

```

```

[ ]: print(target_column_name+str('_transformed'))
     print(hist1[target_column_name].hist())

```

```

[ ]: with_standardization, train_r2_, test_r2_, hist1, hist2, target_column_name,
     ↪training_data_RMSE, test_data_RMSE = pred_model.
     ↪prepare_data_and_create_model(molecular_descriptors_df=data,
     ↪
     ↪         correlation_threshold=0.50,
     ↪
     ↪         standardization=True,
     ↪
     ↪         model_type='RandomForestRegressor',
     ↪
     ↪         n_estimators_=12,
     ↪
     ↪         target_column_name = target,
     ↪
     ↪         random_state=random_state,
     ↪
     ↪         train_test_split_=True,
     ↪
     ↪         verbose=True)

```

### 3.1 Search inside correlation space

```

[25]: step = 0.01
     initial_step = corr_low
     last_step = corr_high
     first_list = [x / 100.0 for x in range(int(initial_step*100),
     ↪int(last_step*100), int(step*100))]
     n_estimators = [range(2,21,1)]
     corr_th = []
     second_list = []

```

```

third_list = []
fourth_l = []
fifth_l = []
f_list = []
fif_list = []
for i in first_list:

    for estimator in n_estimators[0]:

        without_standardization, train_r2, test_r2, _, h_, target_column_name,
        ↪ training_data_RMSE, test_data_RMSE = pred_model.
        ↪ prepare_data_and_create_model(molecular_descriptors_df=data,

        ↪ correlation_threshold=i,

        ↪ standardization=False,

        ↪ model_type='RandomForestRegressor',

        ↪ n_estimators_=estimator,

        ↪ target_column_name = target,

        ↪ random_state=random_state,

        ↪ train_test_split_=True,

        ↪ verbose=False)
        corr_th.append(i)
        second_list.append(train_r2)
        third_list.append(test_r2)
        fourth_l.append(training_data_RMSE)
        fifth_l.append(test_data_RMSE)
        f_list.append(len(h_))
        fif_list.append(estimator)

```

```

[26]: df_without_standardization = pd.DataFrame(data=corr_th, columns=["Correlation_
        ↪ threshold"])
df_without_standardization['Training data R^2 score'] = second_list
df_without_standardization['Test data R^2 score'] = third_list
df_without_standardization['Training RMSE'] = fourth_l
df_without_standardization['Test RMSE'] = fifth_l
df_without_standardization['Number of features'] = f_list
df_without_standardization['Number of estimators'] = fif_list

```

```

[27]: df_random_forest = df_without_standardization.copy()
      #df_without_standardization.to_excel('../Data/
      ↪A549_Random_forest_rs_'+str(random_state)+'.xlsx')

[28]: corre_list = [x / 100.0 for x in range(int(initial_step*100),
      ↪int(last_step*100), int(0.01*100))]
      for element in corre_list:
          element_ =
          ↪df_without_standardization[df_without_standardization['Correlation_
          ↪threshold'] == float(element)]
          plt.plot(element_['Number of estimators'], element_['Training data R^2_
          ↪score'], label = "Training data R^2 score", marker='v')
          plt.plot(element_['Number of estimators'], element_['Test data R^2 score'],
          ↪label = "Test data R^2 score", marker='D')
          plt.legend()
          plt.xlabel('Number of estimators -> correlation threshold: '+str(element)+'.'
          ↪\n Number of features: '+str(element_['Number of features'].iloc[0]))
          plt.xlim(max(element_['Number of estimators'])+1, min(element_['Number of_
          ↪estimators'])-1)
          plt.ylabel('R^2 score')
          plt.ylim([0, 1])
          plt.rc('grid', linestyle="-. ", color='black')
          plt.grid(True)
          plt.show()

```

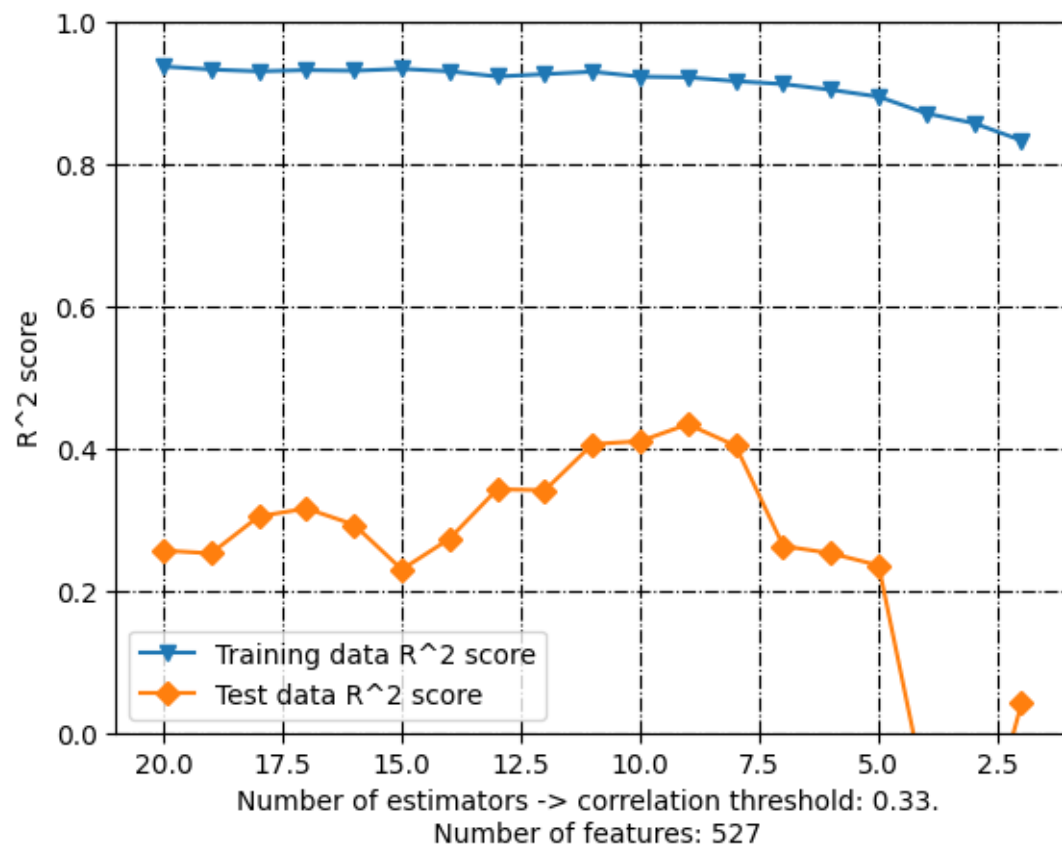

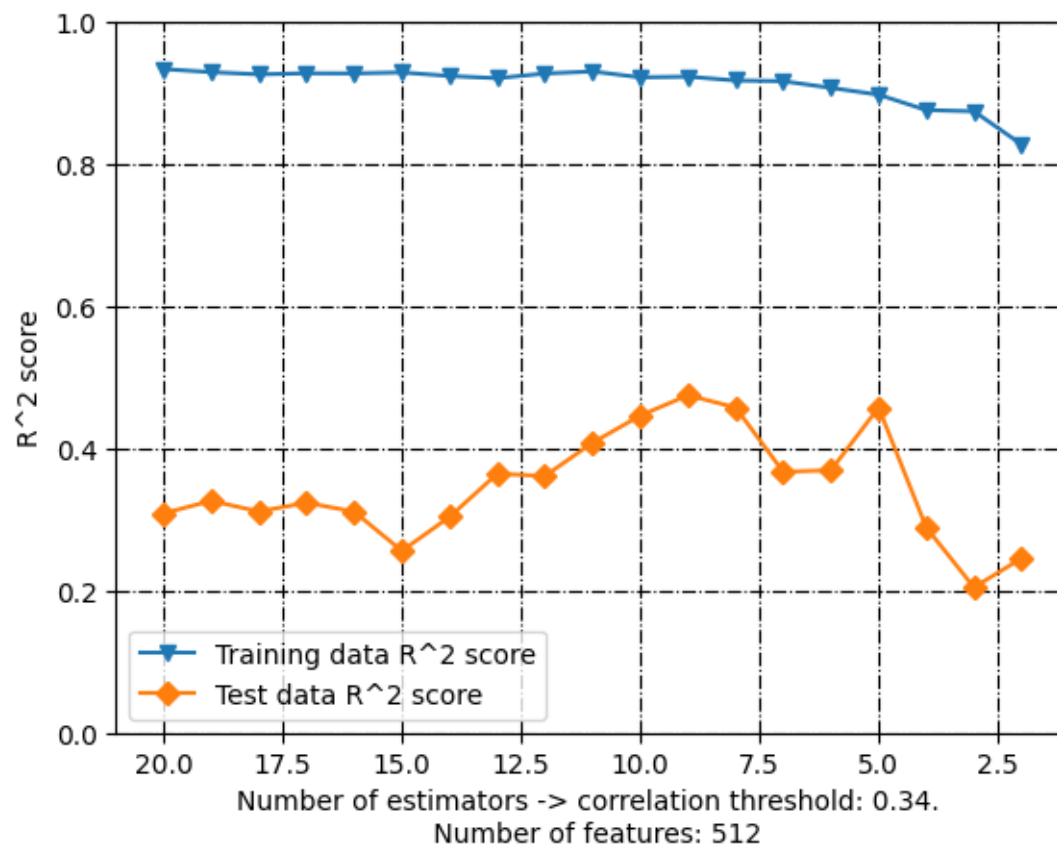

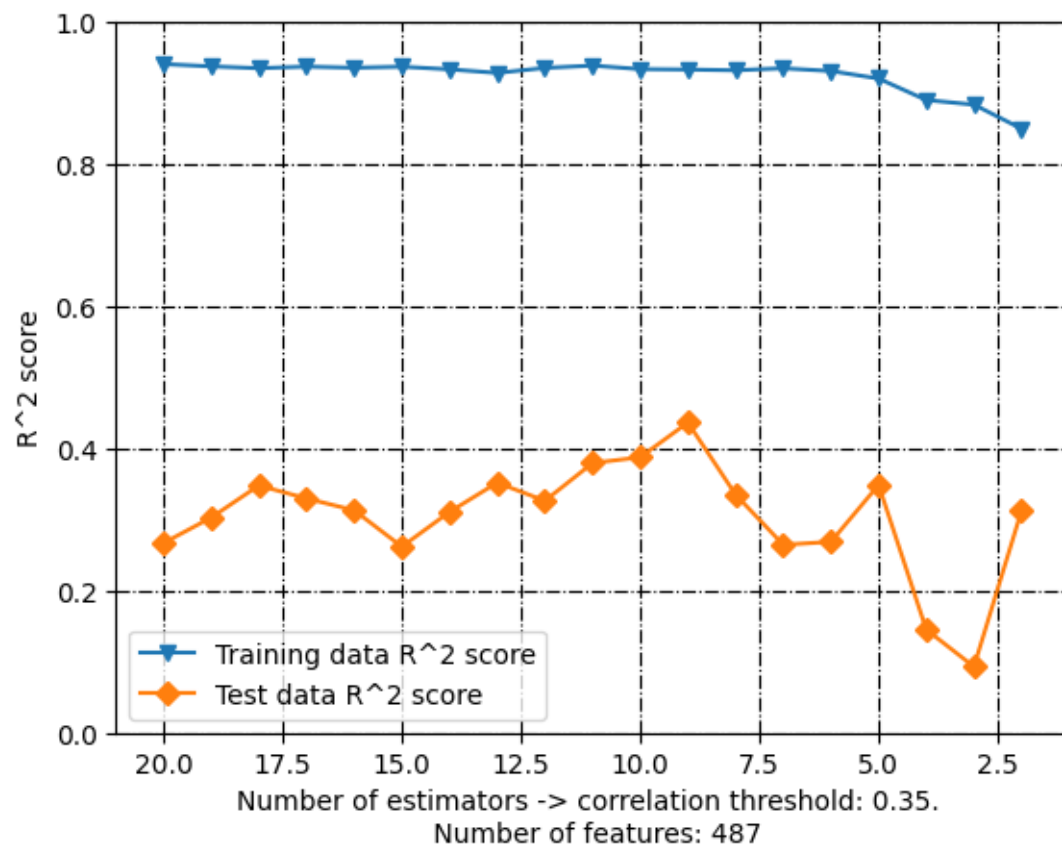

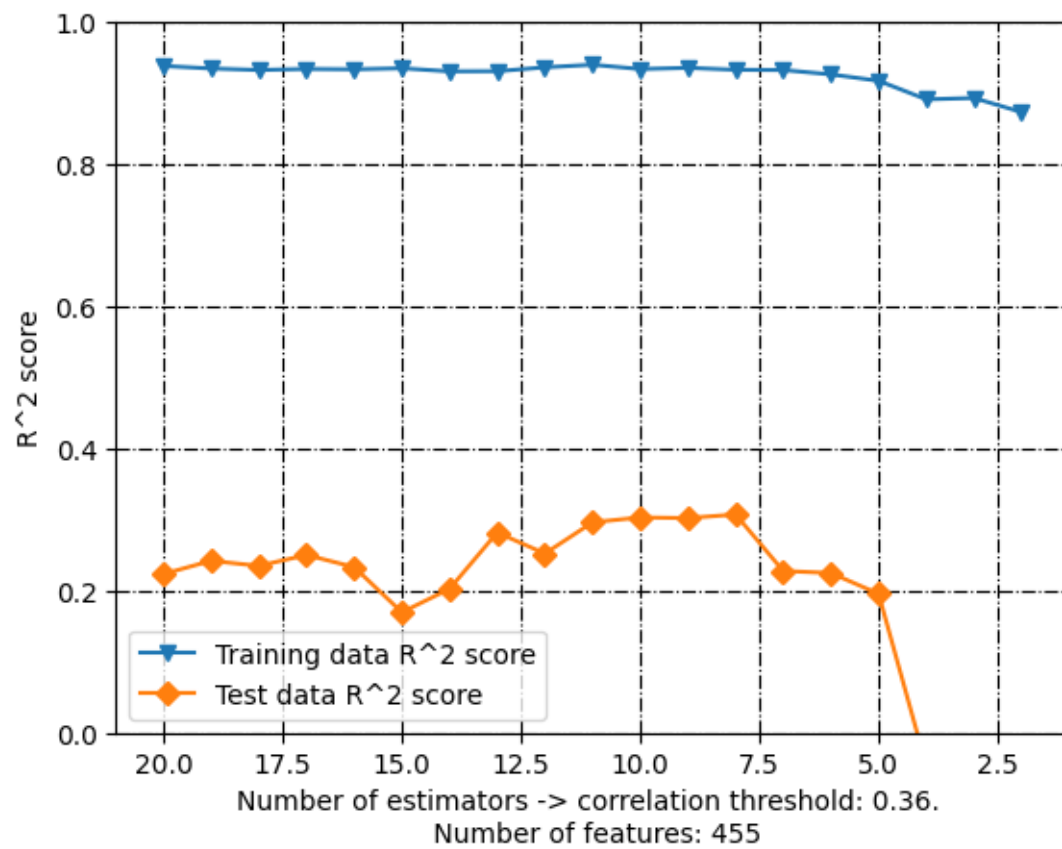



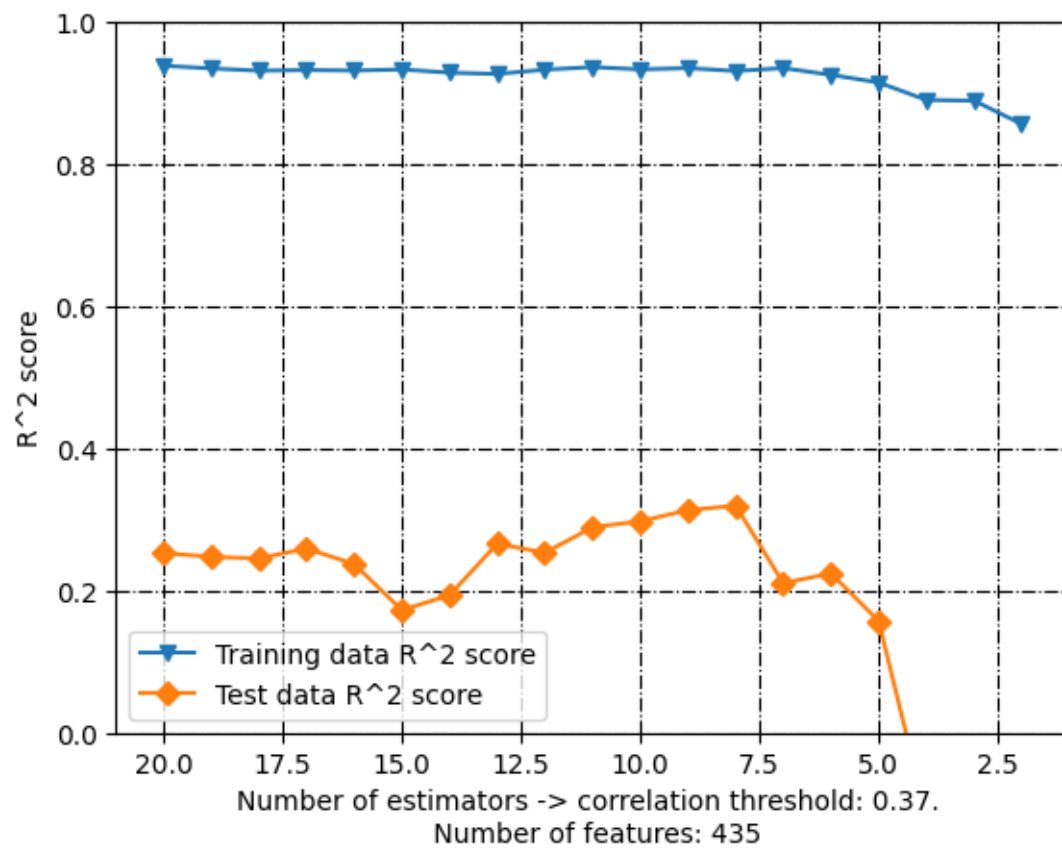

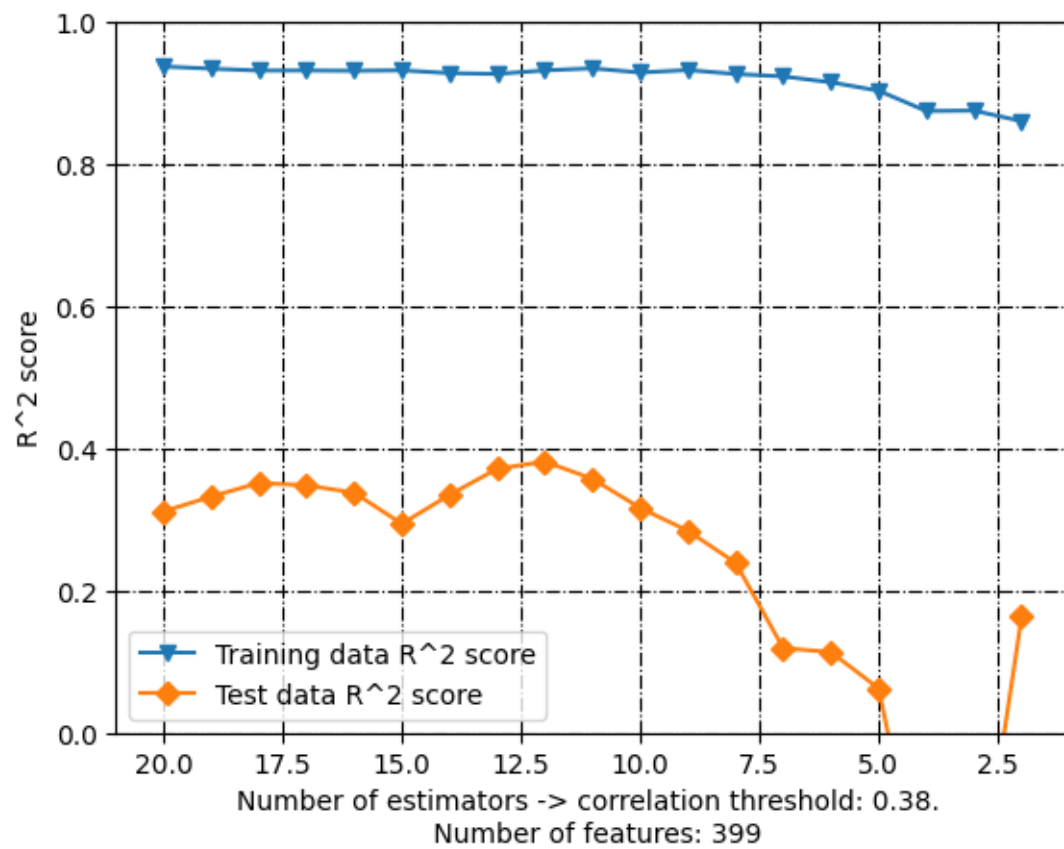

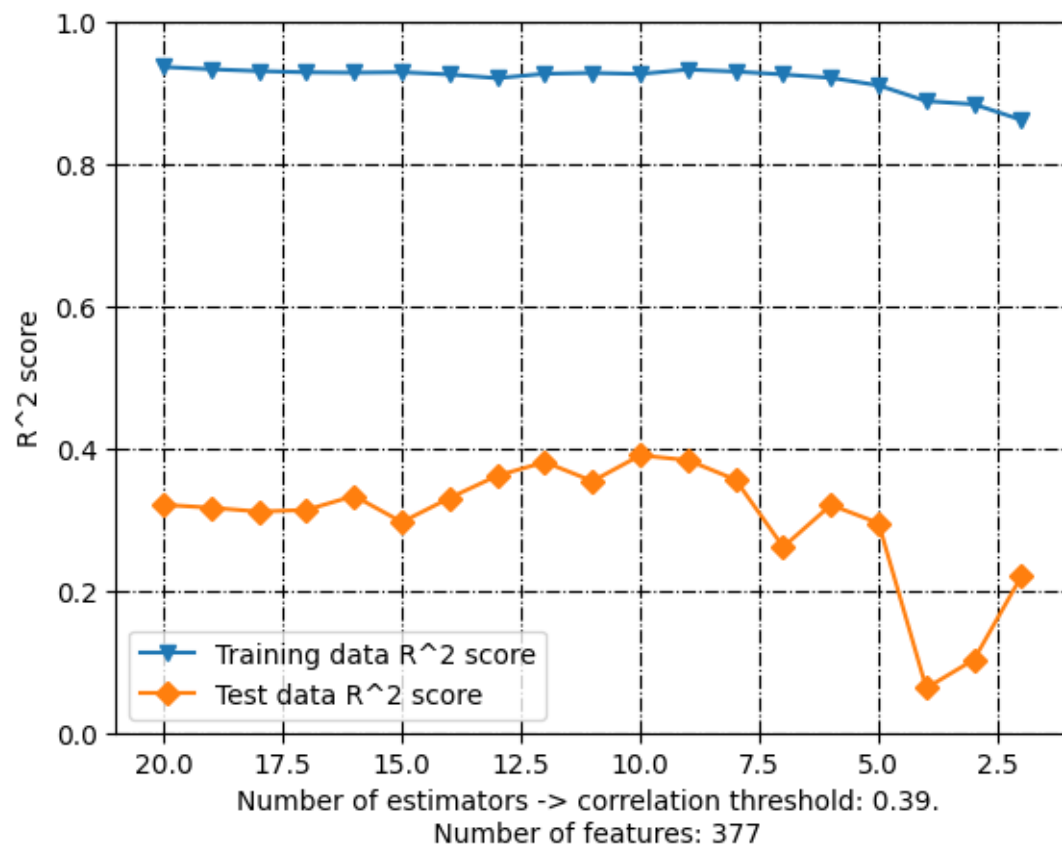

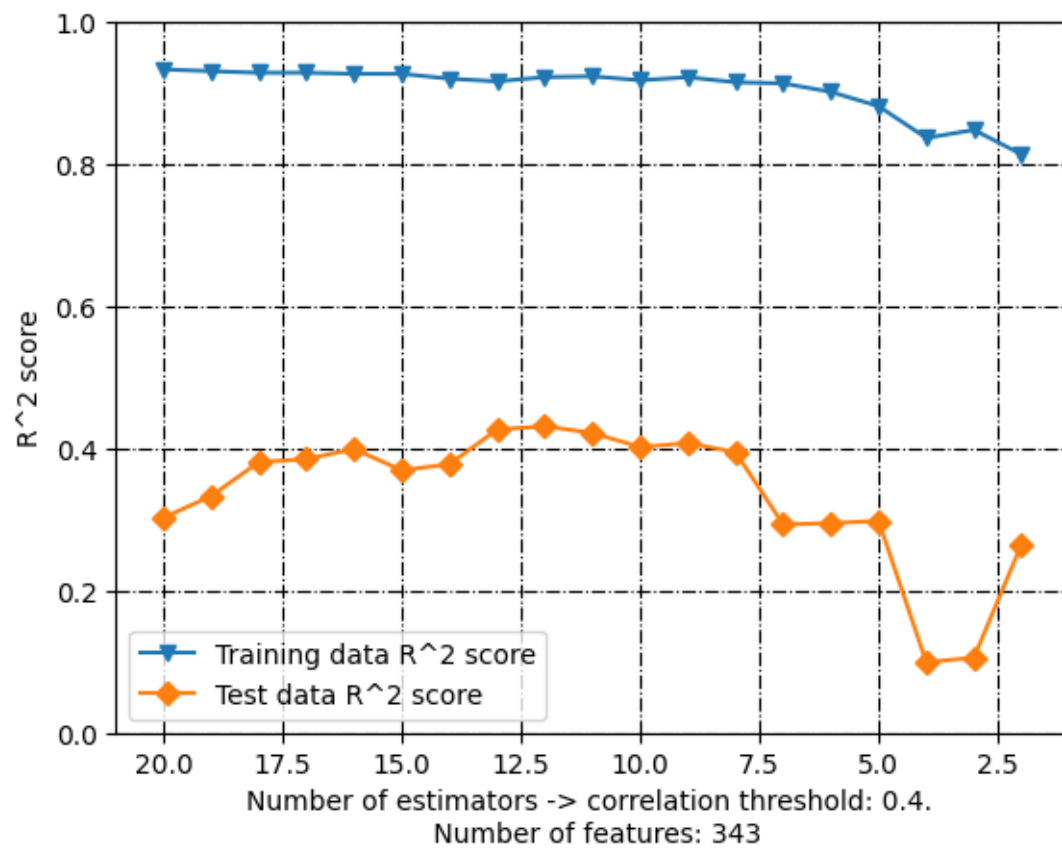

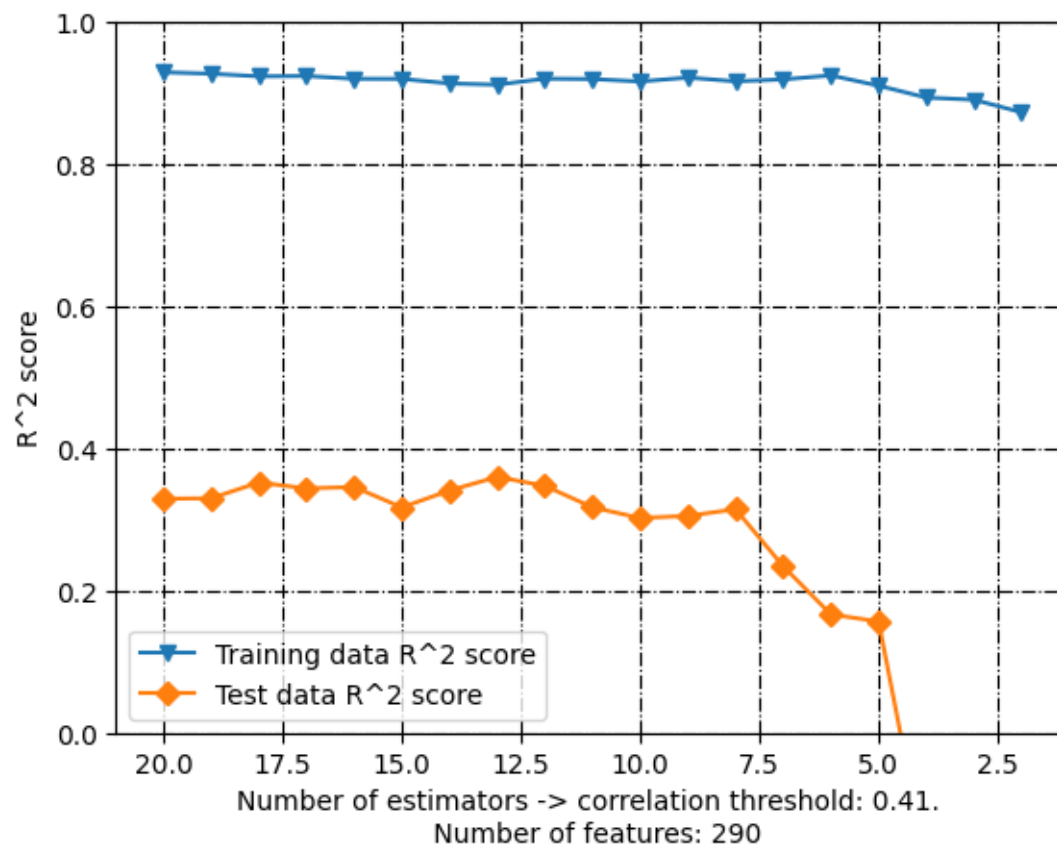

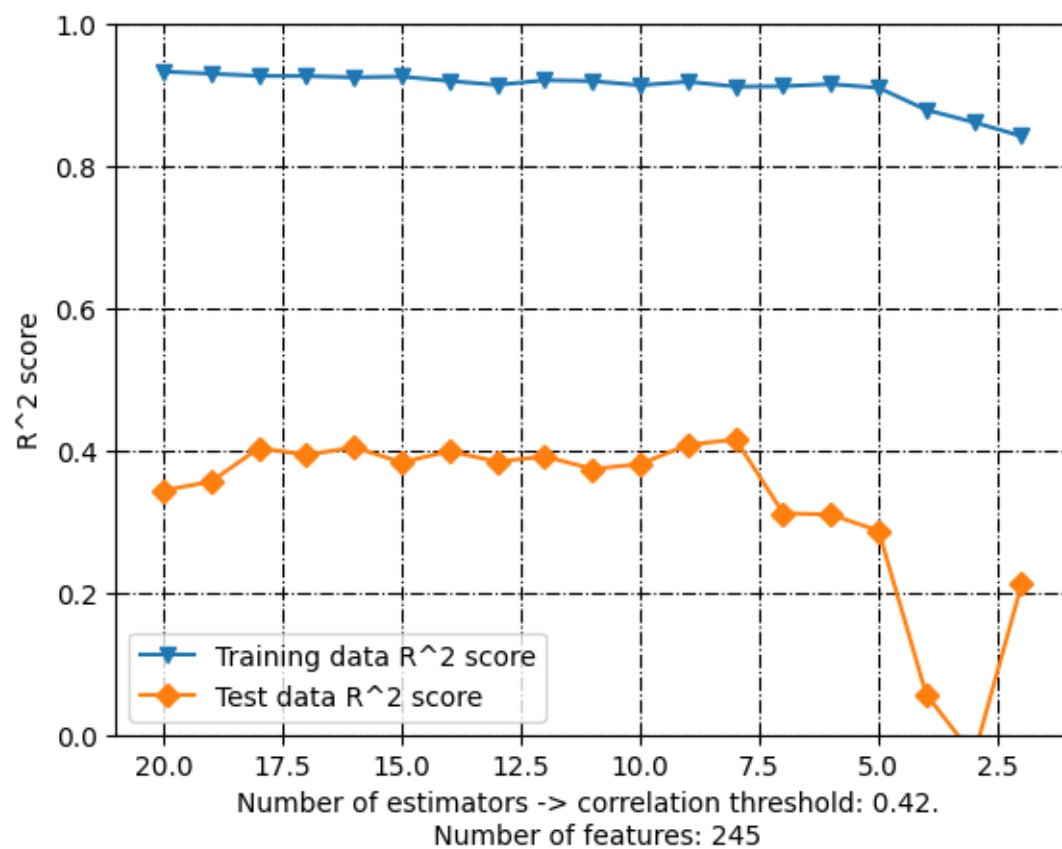

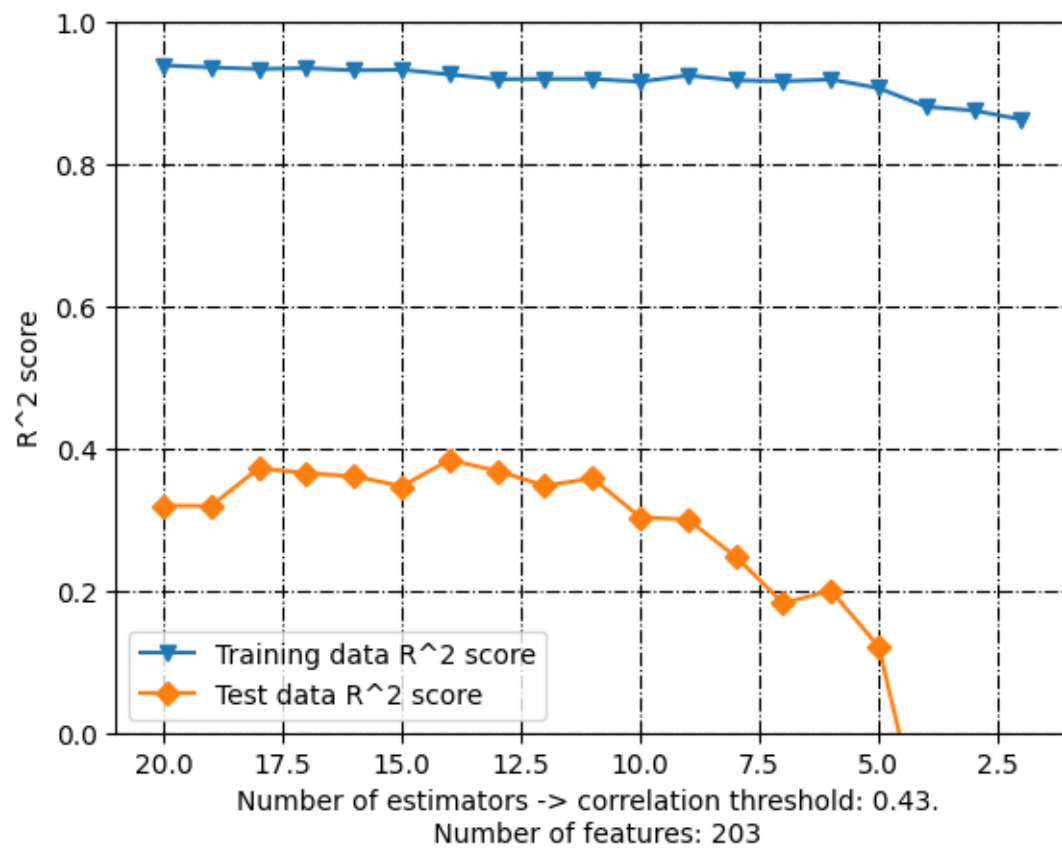

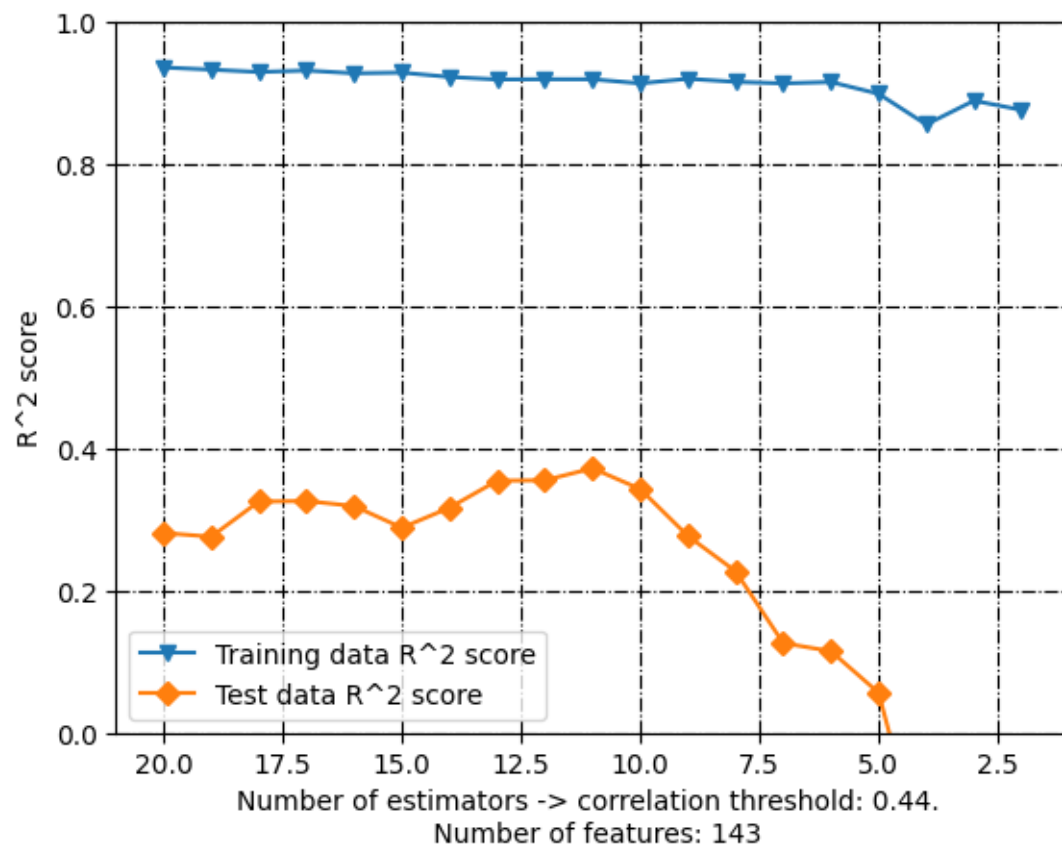



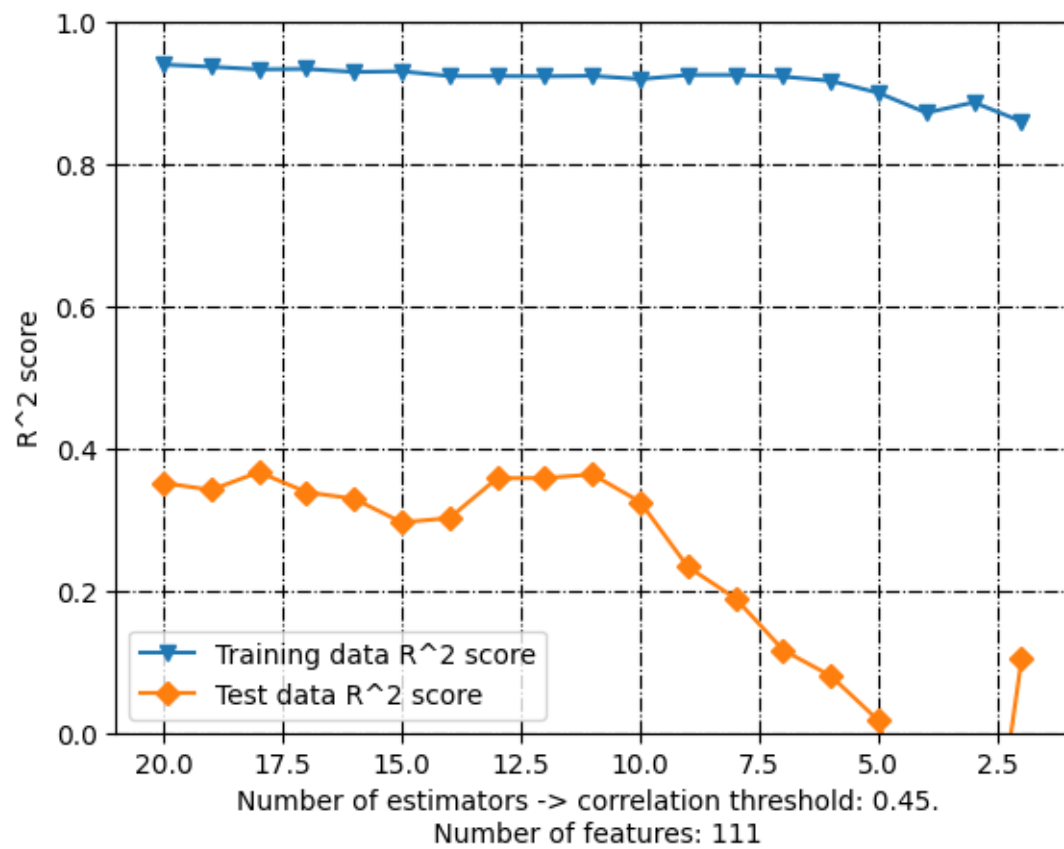

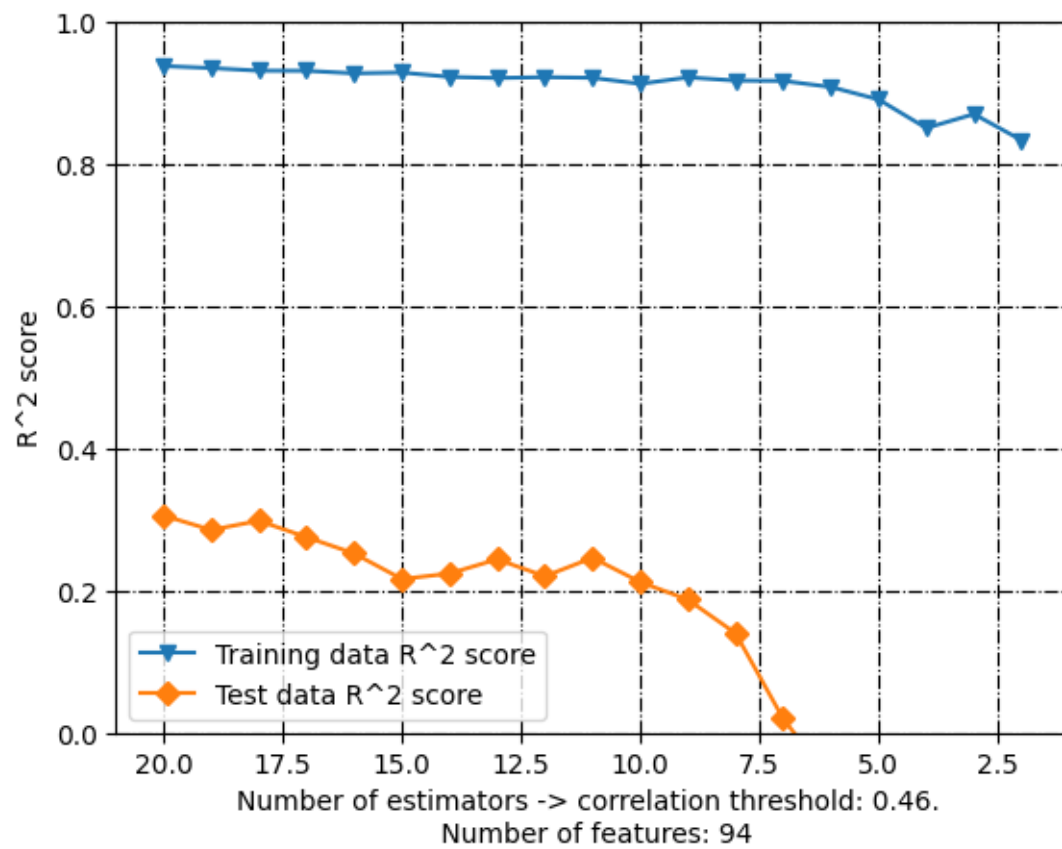

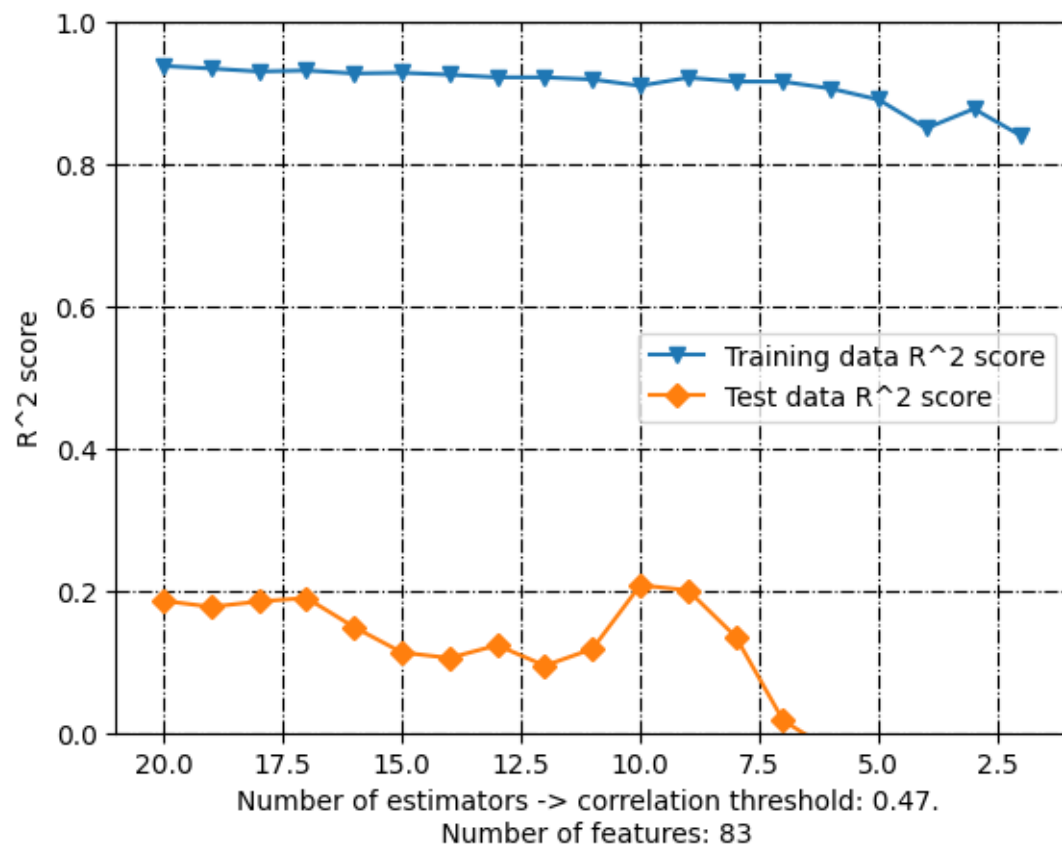

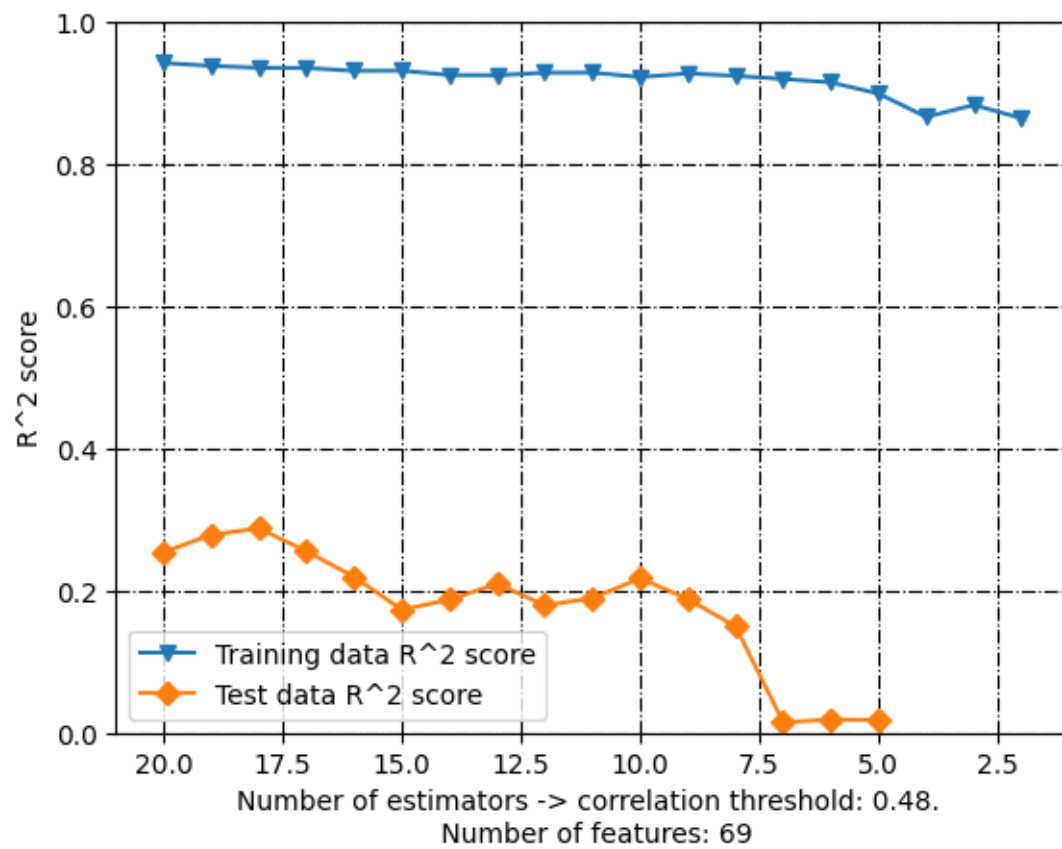

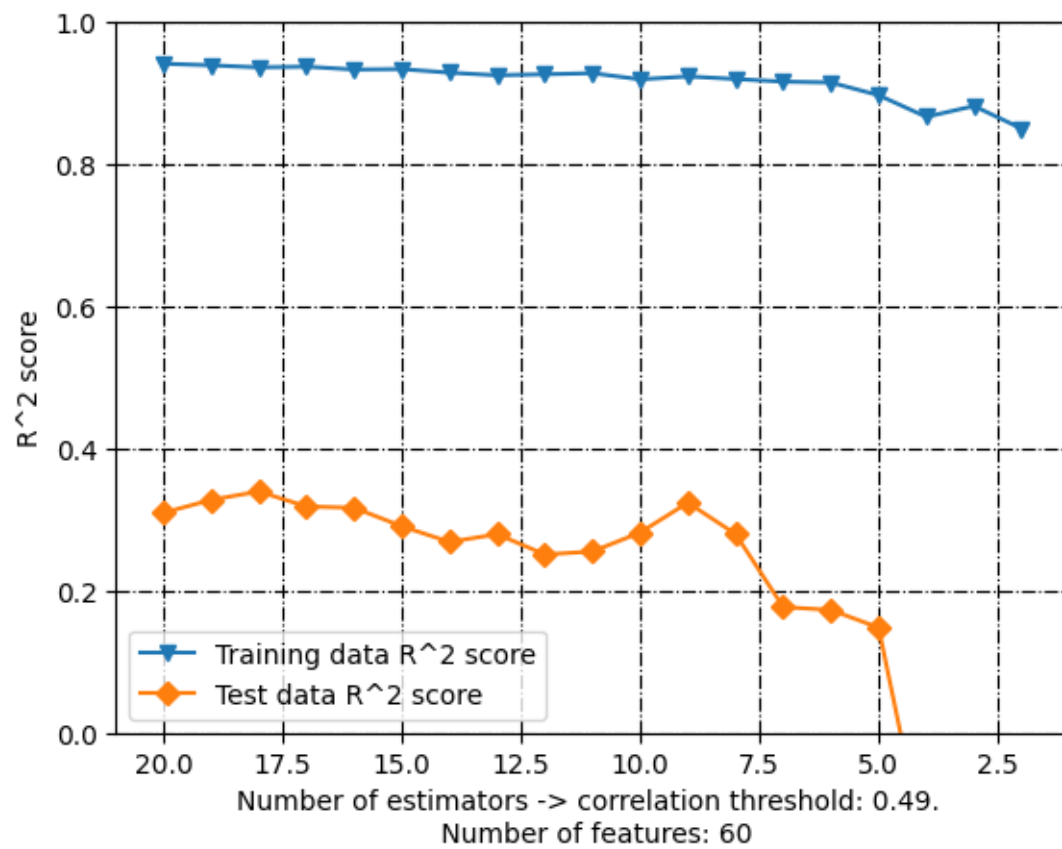

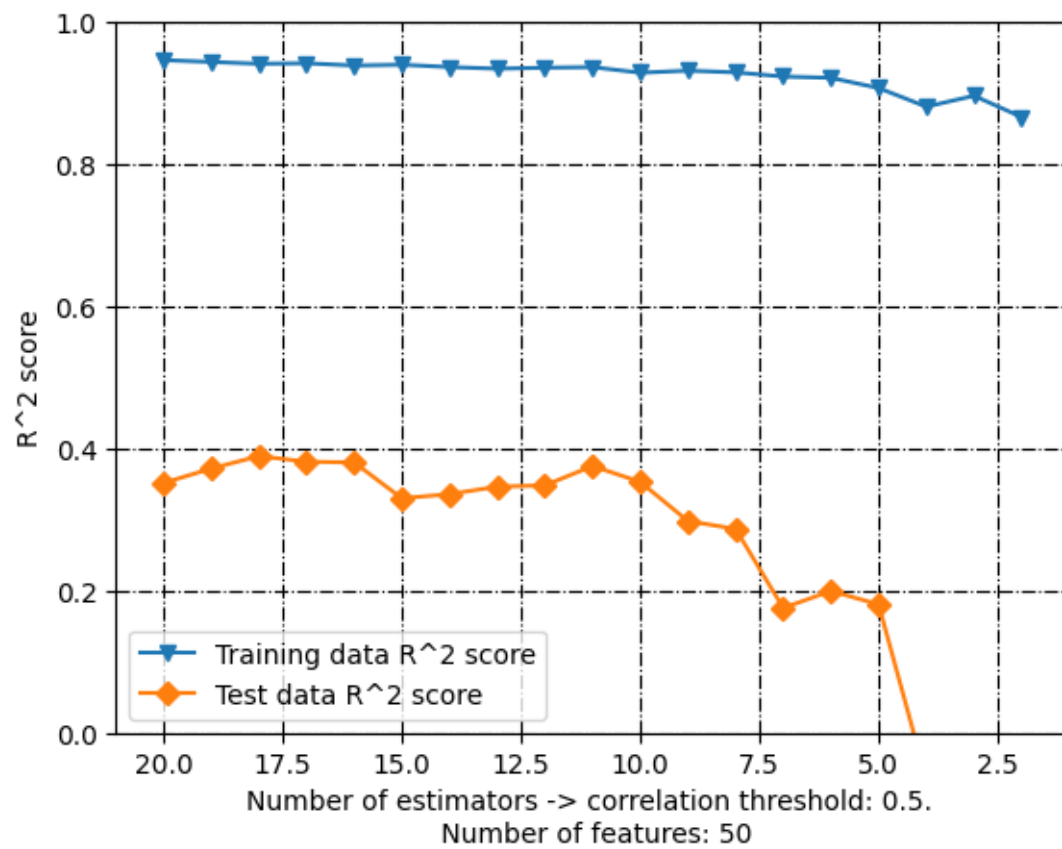

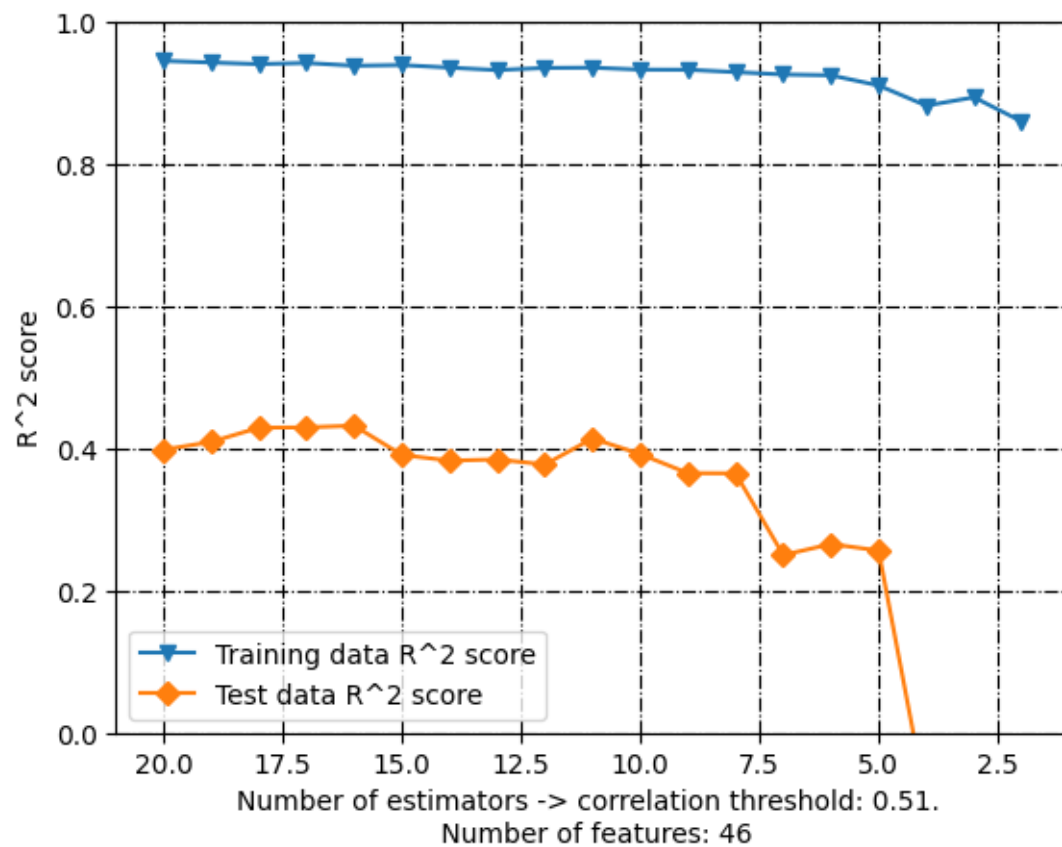

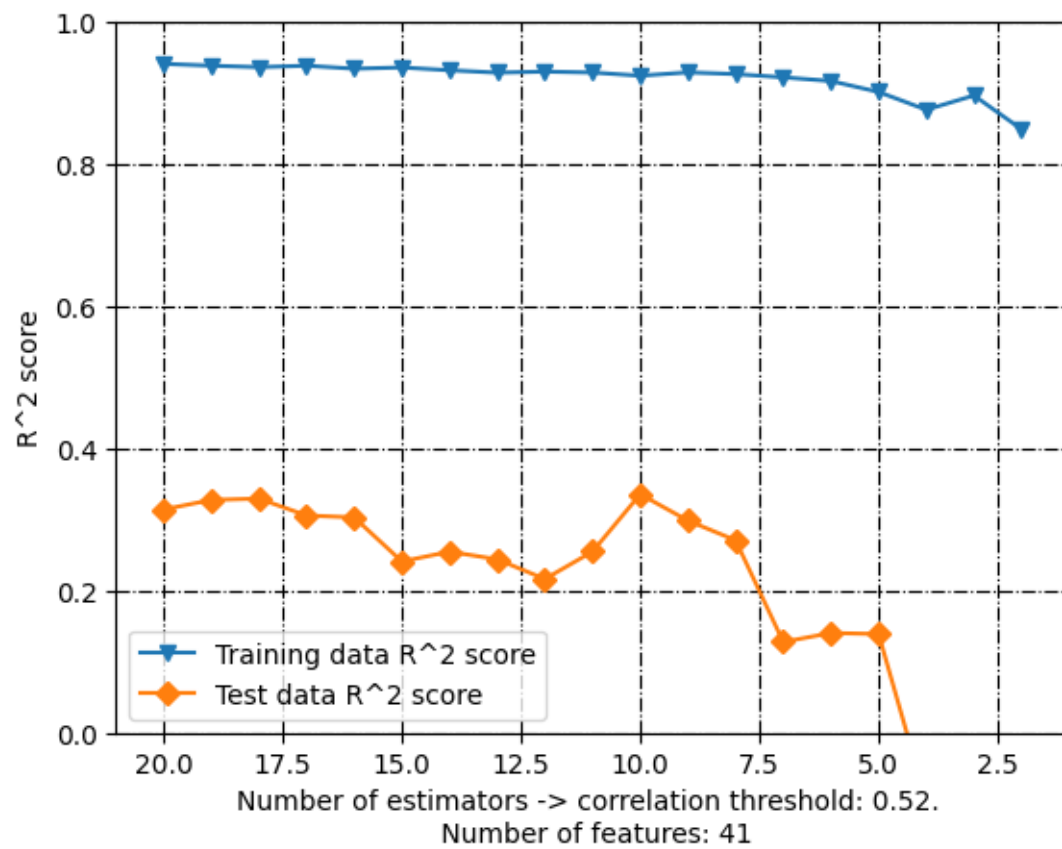



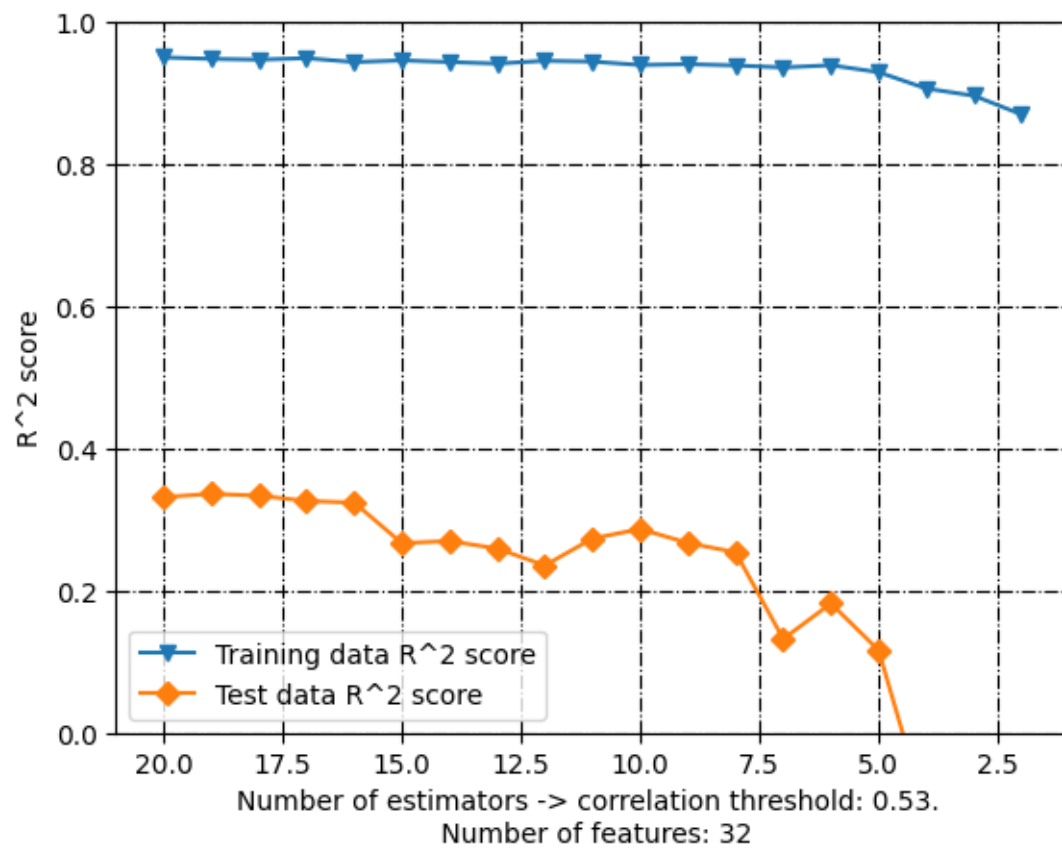

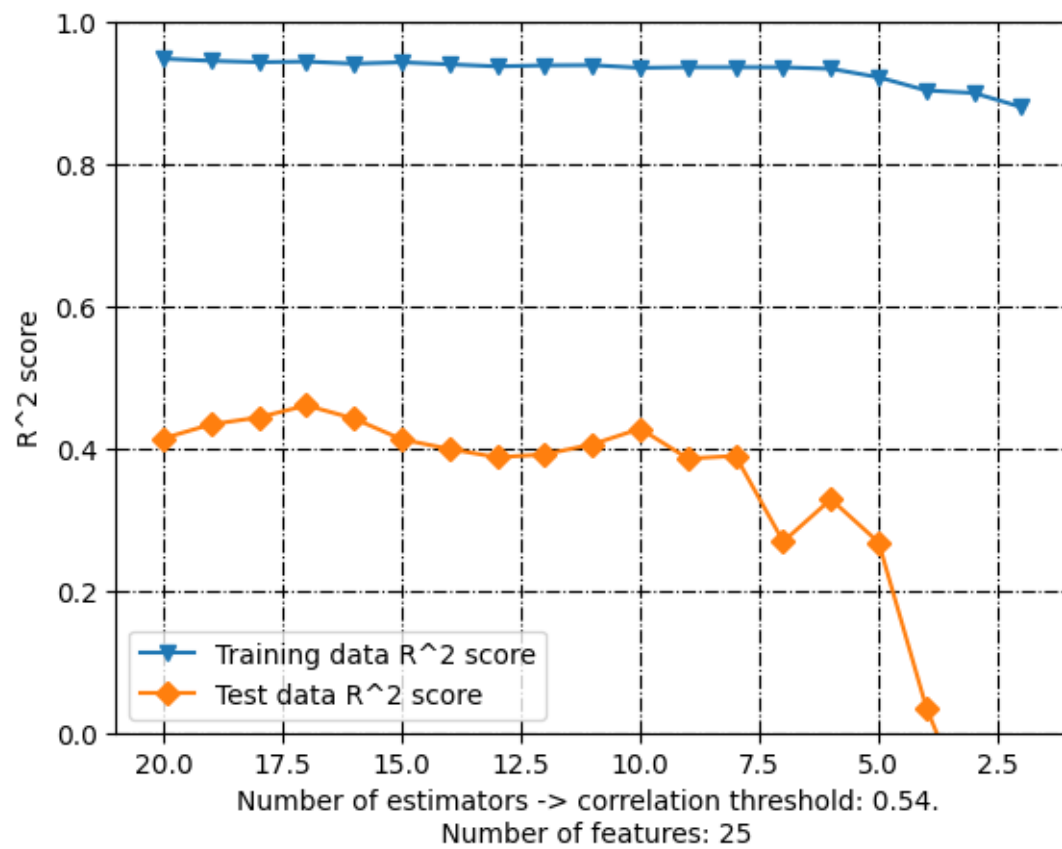

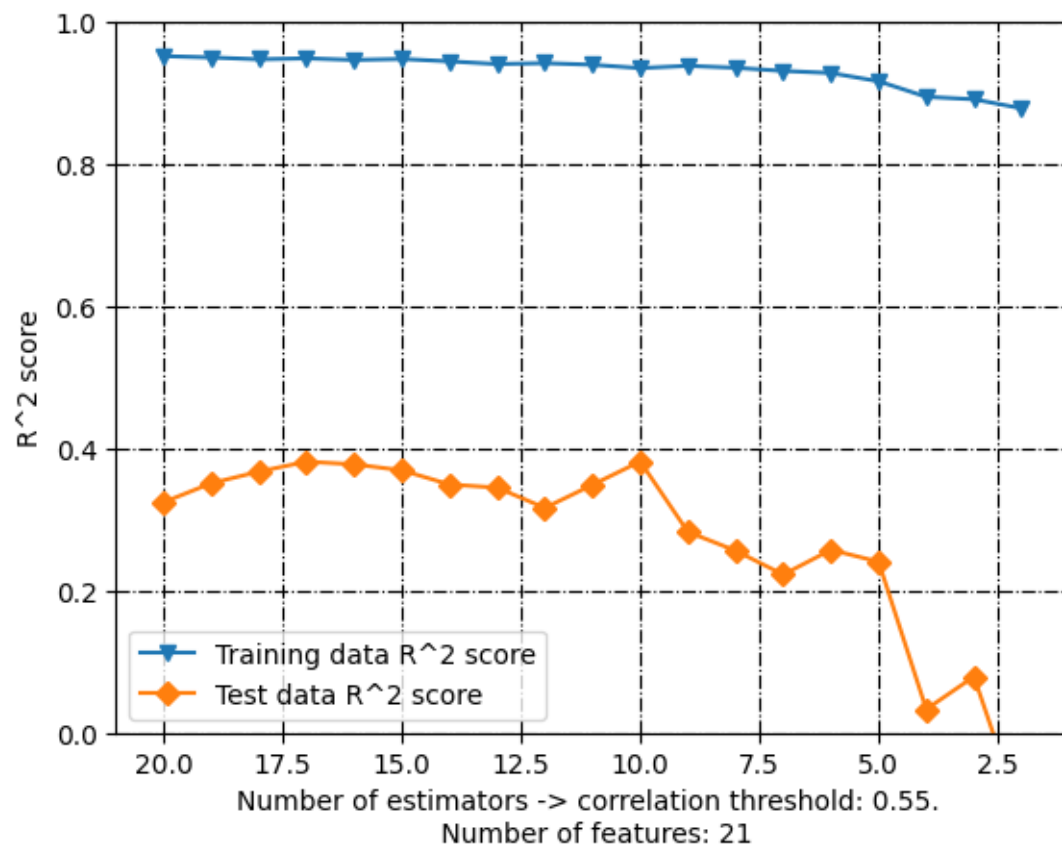

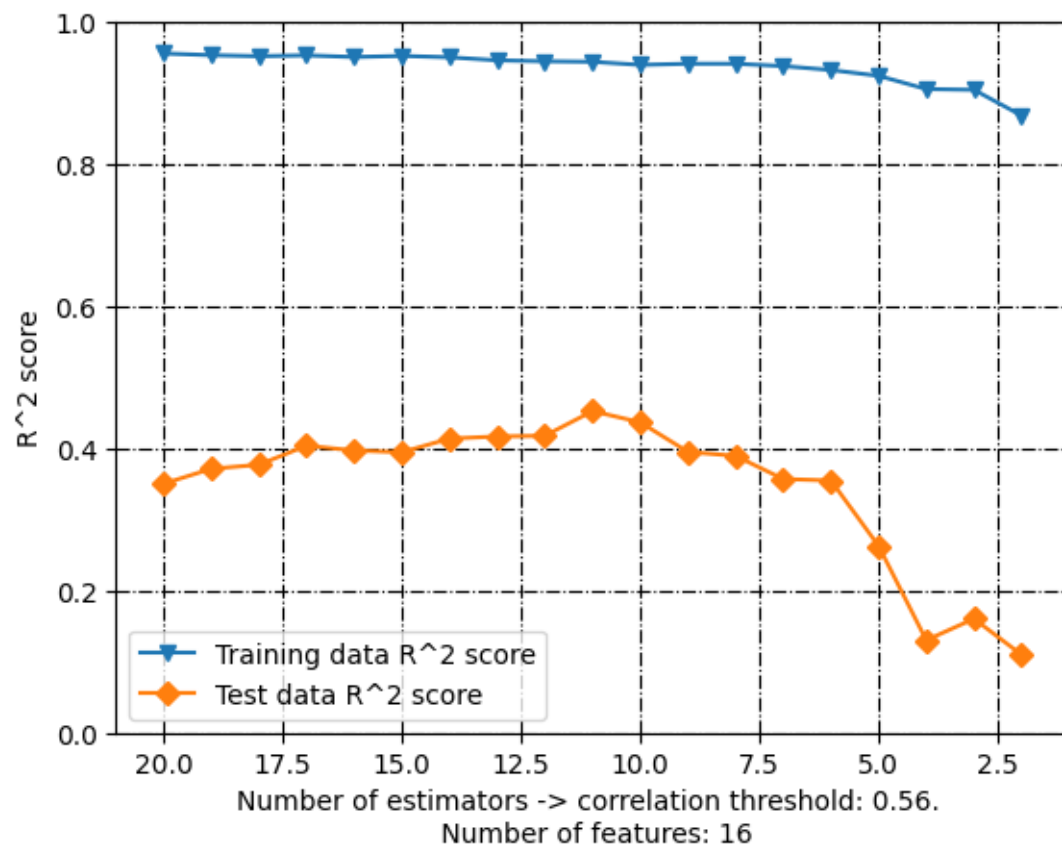

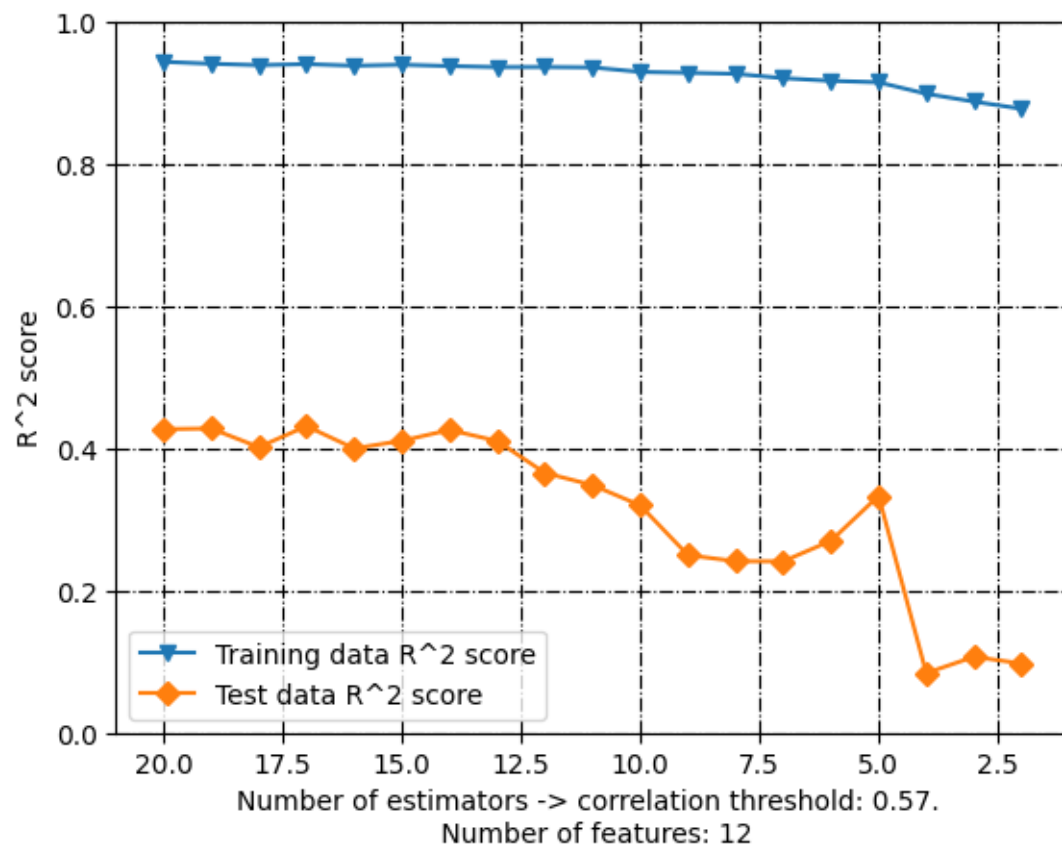

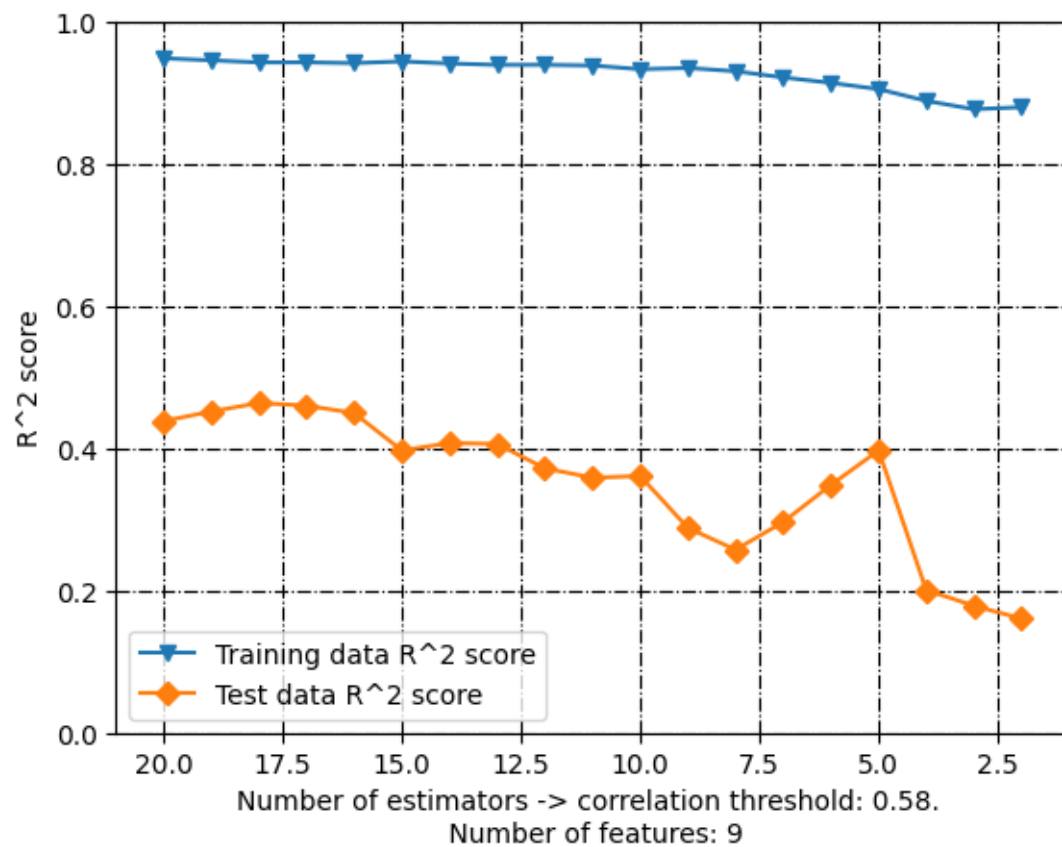

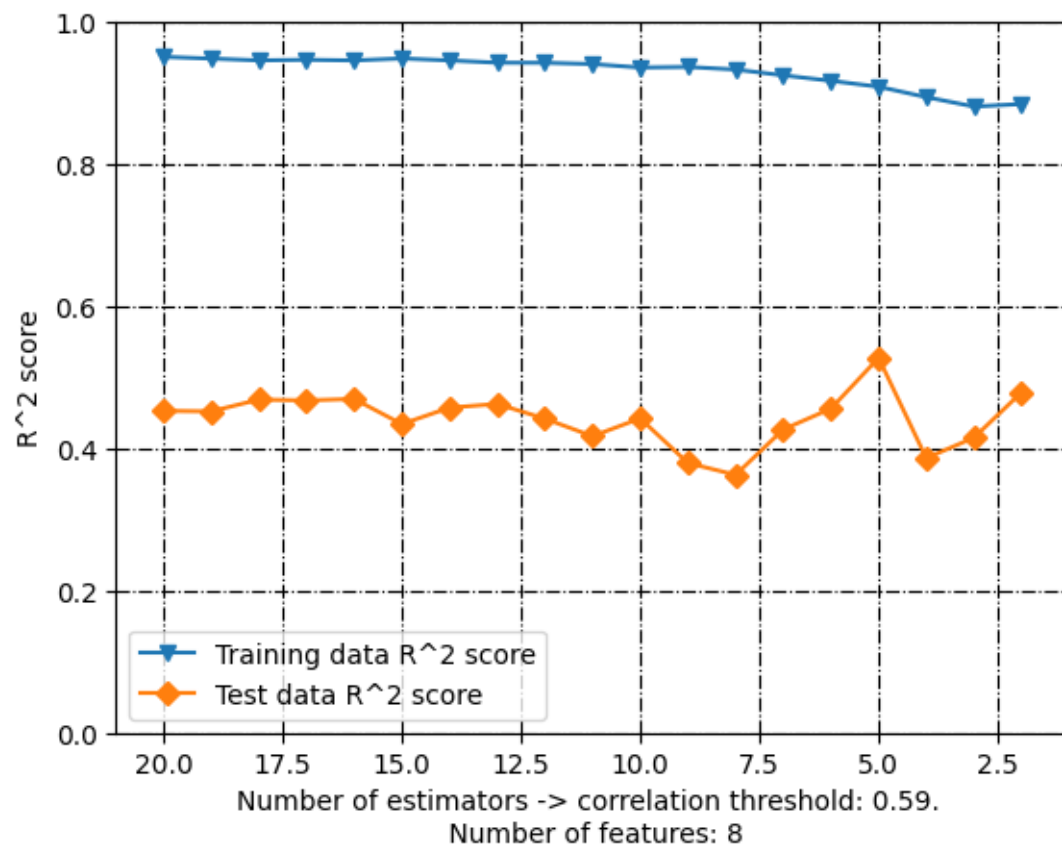

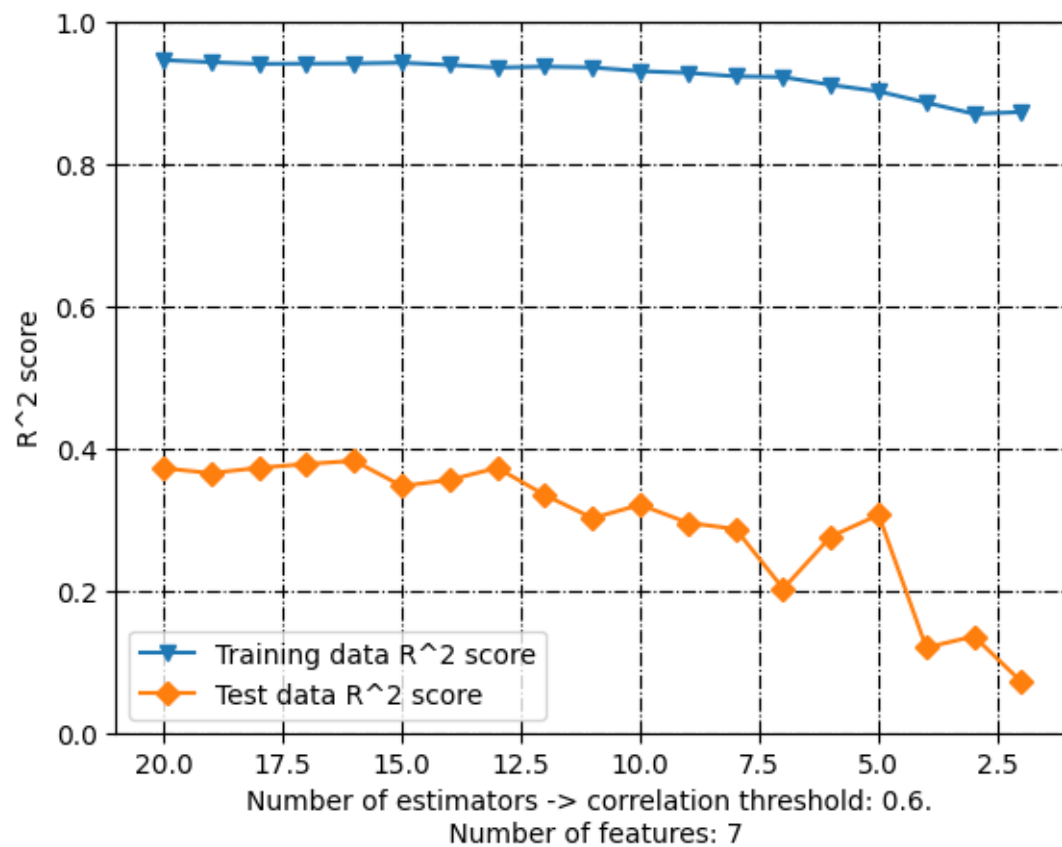



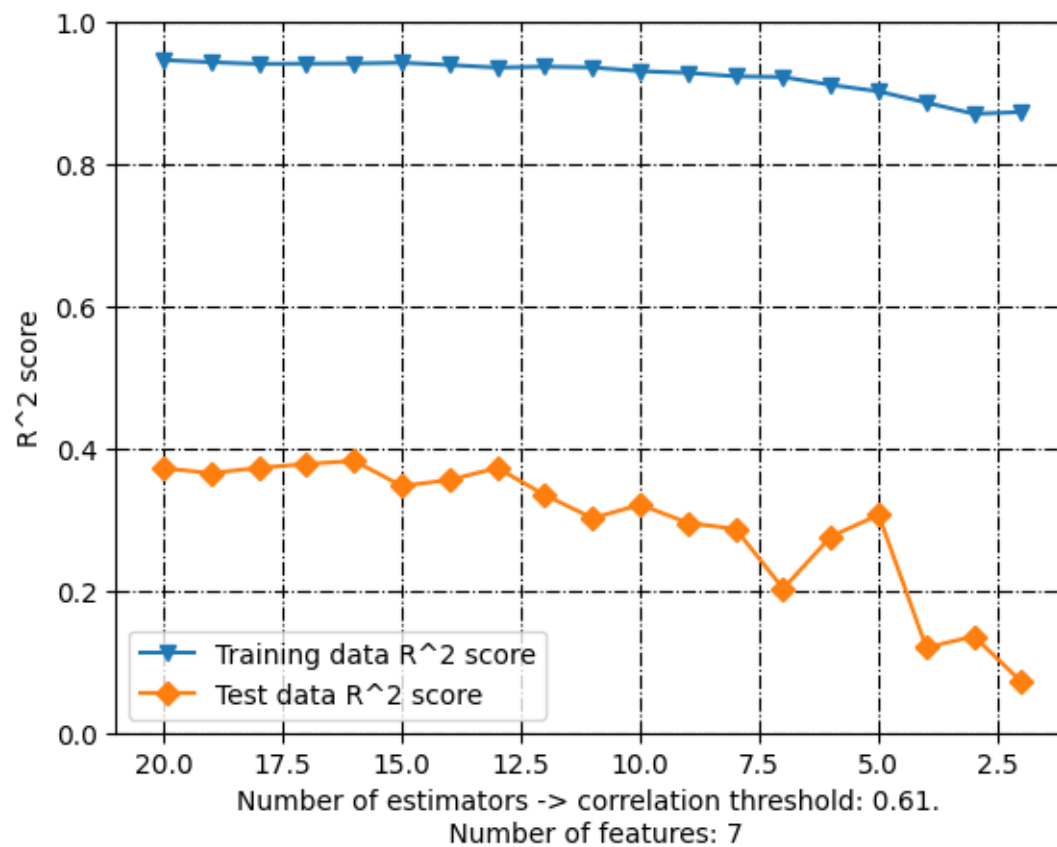

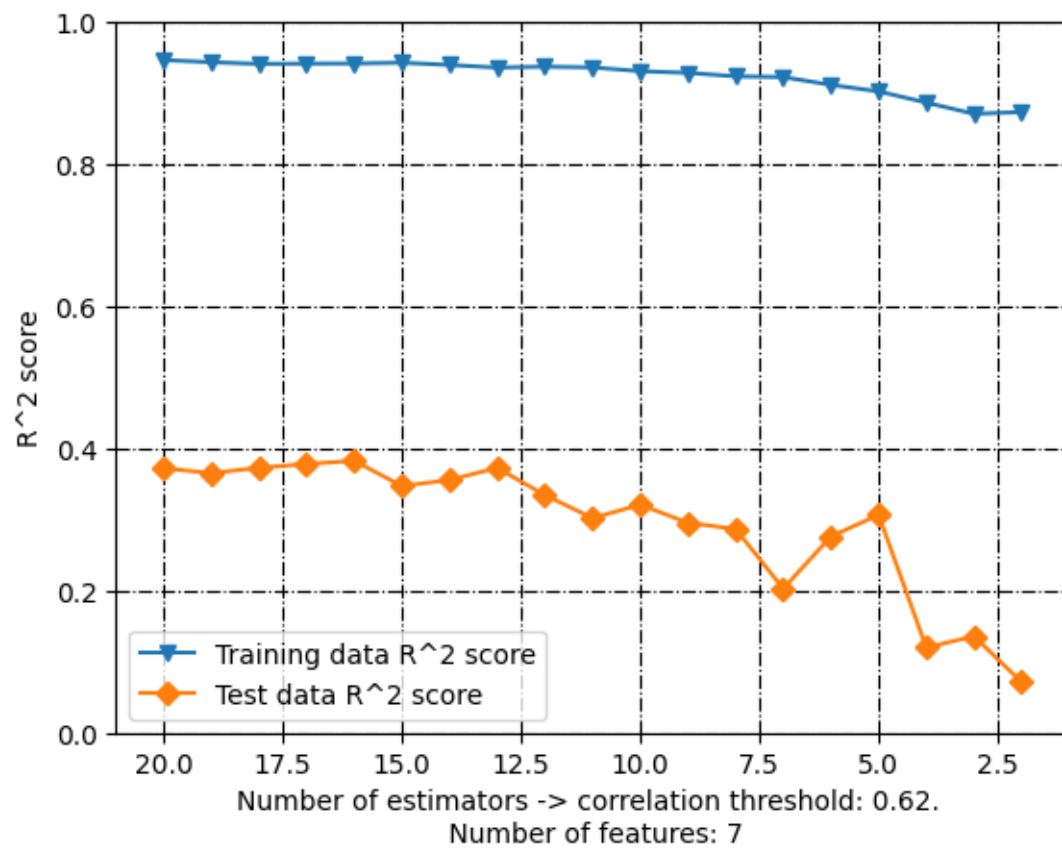

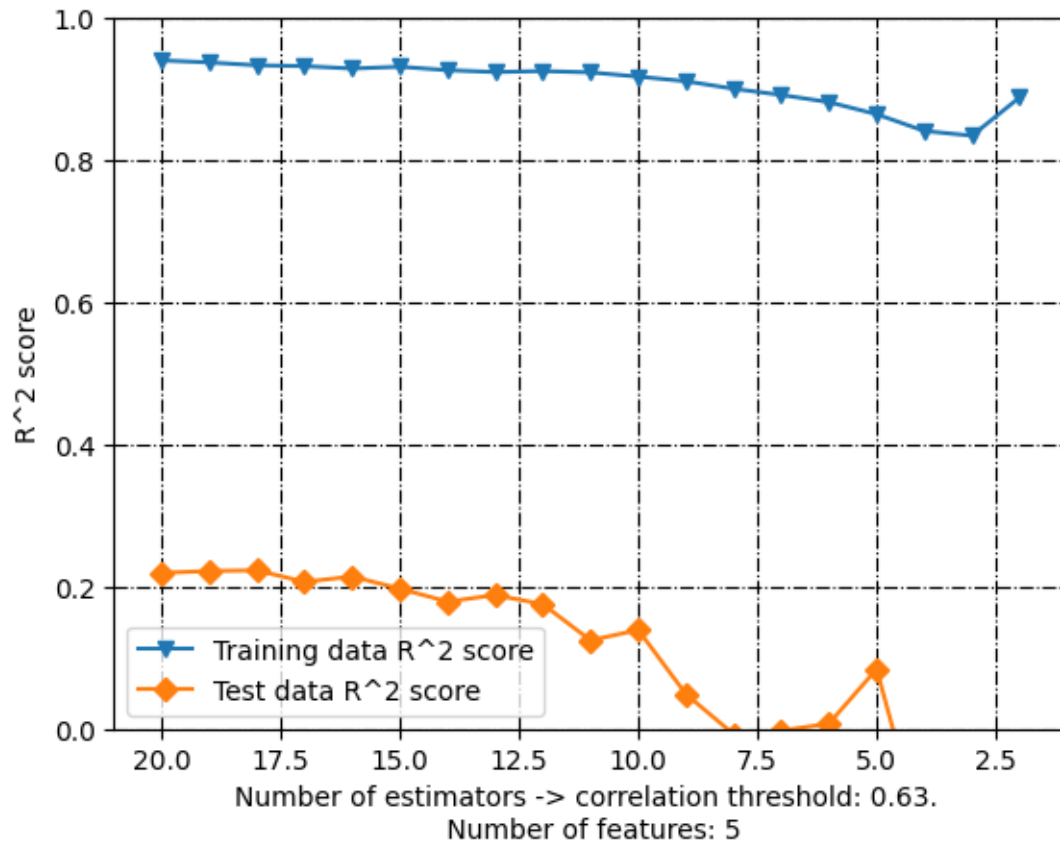

```
[29]: plt.plot(df_without_standardization['Correlation threshold'],  
             df_without_standardization['Number of features'], label = "Number of  
             features", marker='.')  
plt.legend()  
plt.xlabel('Correlation threshold')  
plt.ylabel('Number of features')  
plt.show()
```

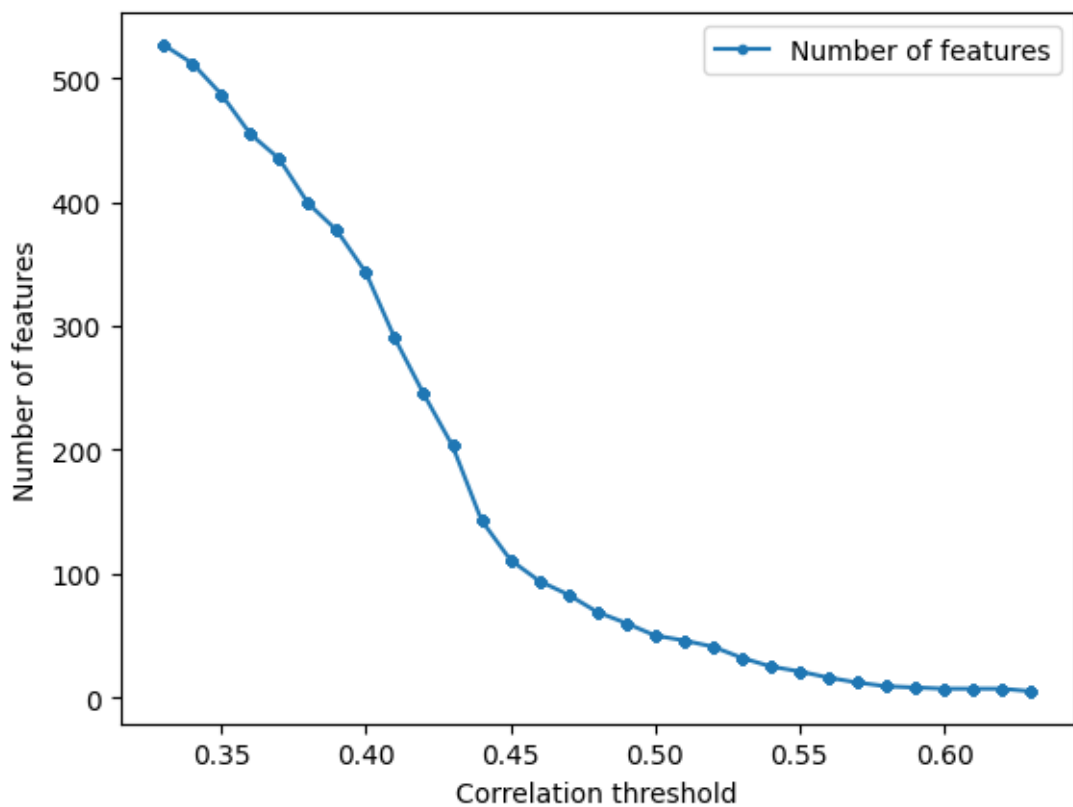

[ ]:

## 4 KNeighborsRegressor

```
[30]: without_standardization, train_r2_, test_r2_, hist1, hist2, target_column_name,
      ↪ training_data_RMSE, test_data_RMSE = pred_model.
      ↪ prepare_data_and_create_model(molecular_descriptors_df=data,
      ↪
      ↪         correlation_threshold=0.50,
      ↪
      ↪         standardization=False,
      ↪
      ↪         model_type='KNeighborsRegressor',
      ↪
      ↪         target_column_name = target,
      ↪
      ↪         random_state=random_state,
      ↪
      ↪         train_test_split_=True,
```



verbose=True)



I am not doing standardization...

```
molecular descriptor name
0          AATSOZ
1          AATSOare
2          AATSOd
3          AATSOdv
4          AATSOi
molecular descriptor name  corr_value
0          AATSOZ          0.018677
1          AATSOare        -0.341313
2          AATSOd          -0.123443
3          AATSOdv         -0.265670
4          AATSOi          -0.428929
molecular descriptor name  corr_value  absolute correlation value
0          AATSOZ          0.018677          0.018677
1          AATSOare        -0.341313          0.341313
2          AATSOd          -0.123443          0.123443
3          AATSOdv         -0.265670          0.265670
4          AATSOi          -0.428929          0.428929
molecular descriptor name  corr_value  absolute correlation value
15          AATS1i         -0.561620          0.561620
113         AATSC1c         0.565682          0.565682
125         AATSC2c        -0.543393          0.543393
221         AETA_eta_R      -0.515778          0.515778
224         AMID_C          0.532458          0.532458
molecular descriptor name  corr_value  absolute correlation value
15          AATS1i         -0.561620          0.561620
113         AATSC1c         0.565682          0.565682
125         AATSC2c        -0.543393          0.543393
221         AETA_eta_R      -0.515778          0.515778
224         AMID_C          0.532458          0.532458
The model used is: KNeighbors...
Return the coefficient of determination of the prediction:
0.005488987340492968
R^2 score: 0.5875467049770875
Correlation coefficient: 0.7665159522000097
Test data - unseen during training:
R^2 score: 0.005488987340492968
Correlation coefficient: 0.07408770033205896
[7.48268636 6.95799273 6.00648426 5.8661154 7.4119163 6.37290721
 6.70755163 6.02979336 5.77771093 6.07868985 5.73752796 6.4854175
 7.23551212 5.84727787 6.88998599 6.05037836]
8          6.159455
110        6.065502
69         5.552842
```

```
95      5.200659
11      7.250264
104     6.000000
52      6.823909
112     6.853872
101     5.000000
50      5.769551
100     6.136677
103     6.000000
21      6.398375
60      5.537602
84      7.002177
39      6.638272
```

```
Name: LoVo/DX, dtype: float64
```

```
Training Root Mean Square Error: 0.6156945408160687
```

```
Testing Root Mean Square Error: 0.6277039901858398
```

```
File "C:\Users\aleks\anaconda3\envs\cheminf_gpu\lib\site-
packages\joblib\externals\loky\backend\context.py", line 217, in
_count_physical_cores
    raise ValueError(
```

```
[31]: print(target_column_name+str('_transformed'))
      print(hist1[target_column_name].hist())
```

```
LoVo/DX_transformed
```

```
AxesSubplot(0.125,0.11;0.775x0.77)
```

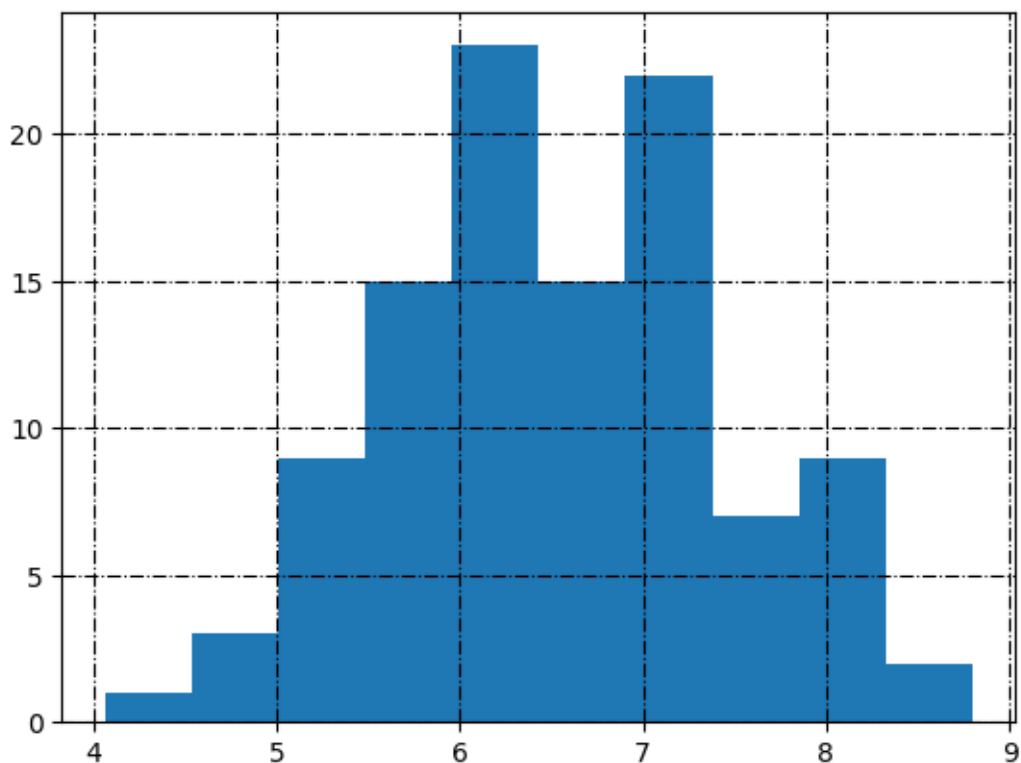

```
[32]: with_standardization, train_r2_, test_r2_, hist1, hist2, target_column_name,
      ↪ training_data_RMSE, test_data_RMSE = pred_model.
      ↪ prepare_data_and_create_model(molecular_descriptors_df=data,
      ↪
      ↪         correlation_threshold=0.50,
      ↪
      ↪         standardization=True,
      ↪
      ↪         model_type='KNeighborsRegressor',
      ↪
      ↪         target_column_name = target,
      ↪
      ↪         random_state=random_state,
      ↪
      ↪         train_test_split_=True,
      ↪
      ↪         verbose=True)
```

I am doing standardization...

|   | molecular descriptor name |
|---|---------------------------|
| 0 | AATS0Z                    |
| 1 | AATS0are                  |

|     |                           |            |                            |
|-----|---------------------------|------------|----------------------------|
| 2   | AATS0d                    |            |                            |
| 3   | AATS0dv                   |            |                            |
| 4   | AATS0i                    |            |                            |
|     | molecular descriptor name | corr_value |                            |
| 0   | AATS0Z                    | 0.018677   |                            |
| 1   | AATS0are                  | -0.341313  |                            |
| 2   | AATS0d                    | -0.123443  |                            |
| 3   | AATS0dv                   | -0.265670  |                            |
| 4   | AATS0i                    | -0.428929  |                            |
|     | molecular descriptor name | corr_value | absolute correlation value |
| 0   | AATS0Z                    | 0.018677   | 0.018677                   |
| 1   | AATS0are                  | -0.341313  | 0.341313                   |
| 2   | AATS0d                    | -0.123443  | 0.123443                   |
| 3   | AATS0dv                   | -0.265670  | 0.265670                   |
| 4   | AATS0i                    | -0.428929  | 0.428929                   |
|     | molecular descriptor name | corr_value | absolute correlation value |
| 15  | AATS1i                    | -0.561620  | 0.561620                   |
| 113 | AATSC1c                   | 0.565682   | 0.565682                   |
| 125 | AATSC2c                   | -0.543393  | 0.543393                   |
| 221 | AETA_eta_R                | -0.515778  | 0.515778                   |
| 224 | AMID_C                    | 0.532458   | 0.532458                   |
|     | molecular descriptor name | corr_value | absolute correlation value |
| 15  | AATS1i                    | -0.561620  | 0.561620                   |
| 113 | AATSC1c                   | 0.565682   | 0.565682                   |
| 125 | AATSC2c                   | -0.543393  | 0.543393                   |
| 221 | AETA_eta_R                | -0.515778  | 0.515778                   |
| 224 | AMID_C                    | 0.532458   | 0.532458                   |

The model used is: KNeighbors...

Return the coefficient of determination of the prediction:  
0.005488987340492968

R<sup>2</sup> score: 0.5875467049770875

Correlation coefficient: 0.7665159522000097

Test data - unseen during training:  
R<sup>2</sup> score: 0.005488987340492968

Correlation coefficient: 0.07408770033205896

[7.48268636 6.95799273 6.00648426 5.8661154 7.4119163 6.37290721  
6.70755163 6.02979336 5.77771093 6.07868985 5.73752796 6.4854175  
7.23551212 5.84727787 6.88998599 6.05037836]

|     |          |
|-----|----------|
| 8   | 6.159455 |
| 110 | 6.065502 |
| 69  | 5.552842 |
| 95  | 5.200659 |
| 11  | 7.250264 |
| 104 | 6.000000 |
| 52  | 6.823909 |
| 112 | 6.853872 |
| 101 | 5.000000 |
| 50  | 5.769551 |



```

100    6.136677
103    6.000000
21     6.398375
60     5.537602
84     7.002177
39     6.638272
Name: LoVo/DX, dtype: float64
Training Root Mean Square Error: 0.6156945408160687
Testing Root Mean Square Error: 0.6277039901858398

```

## 4.1 Search inside correlation space

```

[33]: step = 0.01
initial_step = corr_low
last_step = corr_high
first_list = [x / 100.0 for x in range(int(initial_step*100),
    ↪int(last_step*100), int(step*100))]
second_list = []
third_list = []
fourth_l = []
fifth_l = []
f_list = []
for i in first_list:
    without_standardization, train_r2, test_r2, _, h_, target_column_name,
    ↪training_data_RMSE, test_data_RMSE = pred_model.
    ↪prepare_data_and_create_model(molecular_descriptors_df = data,

    ↪                                correlation_threshold = i,

    ↪                                standardization = False,

    ↪                                model_type = 'KNeighborsRegressor',

    ↪                                target_column_name = target,

    ↪                                random_state=random_state,

    ↪                                train_test_split_ = True,

    ↪                                verbose = False)
    second_list.append(train_r2)
    third_list.append(test_r2)
    fourth_l.append(training_data_RMSE)
    fifth_l.append(test_data_RMSE)
    f_list.append(len(h_))

```

```
[34]: df_without_standardization = pd.DataFrame(data=first_list,
        ↪columns=["Correlation threshold"])
df_without_standardization['Training data R^2 score'] = second_list
df_without_standardization['Test data R^2 score'] = third_list
df_without_standardization['Training RMSE'] = fourth_l
df_without_standardization['Test RMSE'] = fifth_l
df_without_standardization['Number of features'] = f_list
```

```
[35]: df_k_nearest = df_without_standardization.copy()
df_without_standardization
```

```
[35]:
```

|    | Correlation threshold | Training data R^2 score | Test data R^2 score | \ |
|----|-----------------------|-------------------------|---------------------|---|
| 0  | 0.33                  | 0.427920                | -0.354151           |   |
| 1  | 0.34                  | 0.393236                | -0.610533           |   |
| 2  | 0.35                  | 0.379229                | -0.552617           |   |
| 3  | 0.36                  | 0.374933                | -0.728855           |   |
| 4  | 0.37                  | 0.374933                | -0.728855           |   |
| 5  | 0.38                  | 0.454372                | -0.467707           |   |
| 6  | 0.39                  | 0.462046                | -0.417494           |   |
| 7  | 0.40                  | 0.480161                | -0.515220           |   |
| 8  | 0.41                  | 0.480910                | -0.662761           |   |
| 9  | 0.42                  | 0.466795                | -0.542875           |   |
| 10 | 0.43                  | 0.397237                | -0.581741           |   |
| 11 | 0.44                  | 0.400939                | -0.200479           |   |
| 12 | 0.45                  | 0.382070                | -0.237902           |   |
| 13 | 0.46                  | 0.414411                | -0.345479           |   |
| 14 | 0.47                  | 0.410059                | -0.390075           |   |
| 15 | 0.48                  | 0.593093                | -0.182512           |   |
| 16 | 0.49                  | 0.561020                | -0.162826           |   |
| 17 | 0.50                  | 0.587547                | 0.005489            |   |
| 18 | 0.51                  | 0.534754                | 0.024275            |   |
| 19 | 0.52                  | 0.542145                | 0.024275            |   |
| 20 | 0.53                  | 0.603444                | 0.091865            |   |
| 21 | 0.54                  | 0.623056                | 0.098882            |   |
| 22 | 0.55                  | 0.631901                | 0.205681            |   |
| 23 | 0.56                  | 0.674642                | 0.043061            |   |
| 24 | 0.57                  | 0.666704                | 0.001119            |   |
| 25 | 0.58                  | 0.666959                | -0.241478           |   |
| 26 | 0.59                  | 0.666648                | -0.239143           |   |
| 27 | 0.60                  | 0.670643                | -0.094933           |   |
| 28 | 0.61                  | 0.670643                | -0.094933           |   |
| 29 | 0.62                  | 0.670643                | -0.094933           |   |
| 30 | 0.63                  | 0.673705                | -0.159111           |   |

  

|   | Training RMSE | Test RMSE | Number of features |
|---|---------------|-----------|--------------------|
| 0 | 0.725114      | 0.732460  | 527                |
| 1 | 0.746771      | 0.798794  | 512                |

|    |          |          |     |
|----|----------|----------|-----|
| 2  | 0.755342 | 0.784300 | 487 |
| 3  | 0.757951 | 0.827617 | 455 |
| 4  | 0.757951 | 0.827617 | 435 |
| 5  | 0.708151 | 0.762553 | 399 |
| 6  | 0.703154 | 0.749395 | 377 |
| 7  | 0.691214 | 0.774797 | 343 |
| 8  | 0.690716 | 0.811643 | 290 |
| 9  | 0.700044 | 0.781836 | 245 |
| 10 | 0.744306 | 0.791622 | 203 |
| 11 | 0.742017 | 0.689648 | 143 |
| 12 | 0.753611 | 0.700315 | 111 |
| 13 | 0.733625 | 0.730110 | 94  |
| 14 | 0.736346 | 0.742112 | 83  |
| 15 | 0.611541 | 0.684468 | 69  |
| 16 | 0.635185 | 0.678746 | 60  |
| 17 | 0.615695 | 0.627704 | 50  |
| 18 | 0.653912 | 0.621747 | 46  |
| 19 | 0.648697 | 0.621747 | 41  |
| 20 | 0.603713 | 0.599826 | 32  |
| 21 | 0.588595 | 0.597504 | 25  |
| 22 | 0.581648 | 0.560980 | 21  |
| 23 | 0.546838 | 0.615733 | 16  |
| 24 | 0.553469 | 0.629081 | 12  |
| 25 | 0.553257 | 0.701326 | 9   |
| 26 | 0.553515 | 0.700666 | 8   |
| 27 | 0.550188 | 0.658633 | 7   |
| 28 | 0.550188 | 0.658633 | 7   |
| 29 | 0.550188 | 0.658633 | 7   |
| 30 | 0.547625 | 0.677661 | 5   |

## 4.2 Plots

```
[36]: plt.plot(df_without_standardization['Correlation threshold'],
             df_without_standardization['Training data R^2 score'], label = "Training
             data R^2 score", marker='v')
plt.plot(df_without_standardization['Correlation threshold'],
             df_without_standardization['Test data R^2 score'], label = "Test data R^2
             score", marker='D')
plt.legend()
plt.xlabel('Correlation threshold')
plt.ylabel('R^2 score')
plt.ylim([0, 1])
plt.show()
```

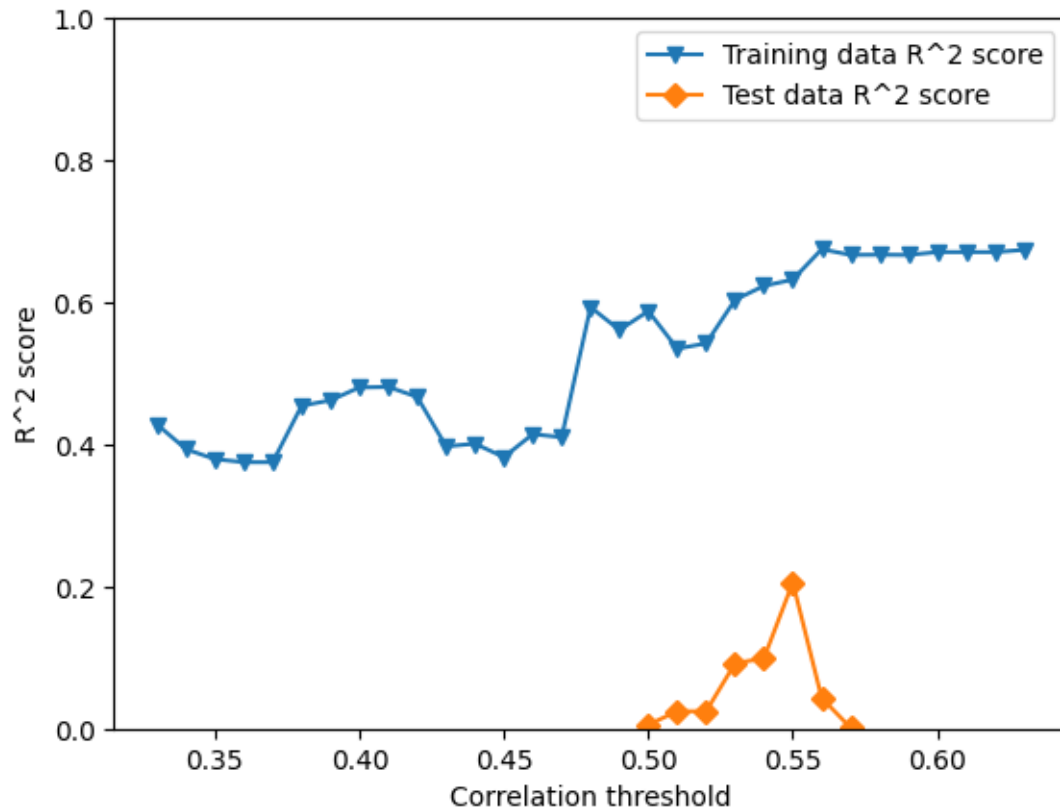

```
[37]: plt.plot(df_without_standardization['Correlation threshold'],  
             df_without_standardization['Number of features'], label = "Number of_  
             features", marker='.')  
plt.legend()  
plt.xlabel('Correlation threshold')  
plt.ylabel('Number of features')  
plt.show()
```

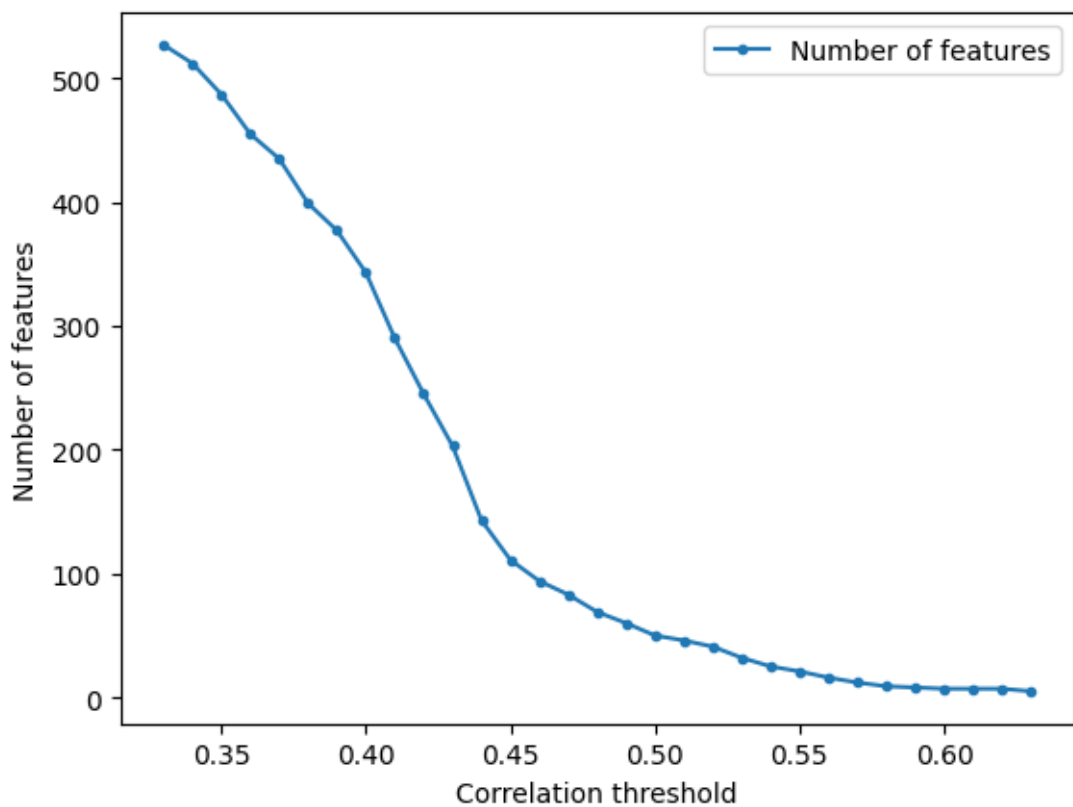

[ ]:

## 5 Support Vector Machines (SVM)

```
[38]: without_standardization, train_r2_, test_r2_, hist1, hist2, target_column_name,
      ↪ training_data_RMSE, test_data_RMSE = pred_model.
      ↪ prepare_data_and_create_model(molecular_descriptors_df=data,
      ↪
      ↪         correlation_threshold=0.50,
      ↪
      ↪         standardization=False,
      ↪
      ↪         model_type='SVR',
      ↪
      ↪         kernel_ = 'linear',
      ↪
      ↪         gamma_ = 'auto',
      ↪
      ↪         target_column_name = target,
```

```

    random_state=random_state,

    train_test_split_=True,

    verbose=True)

```

I am not doing standardization...

|   | molecular descriptor name |  |
|---|---------------------------|--|
| 0 | AATSOZ                    |  |
| 1 | AATSOare                  |  |
| 2 | AATSOd                    |  |
| 3 | AATSOdv                   |  |
| 4 | AATSOi                    |  |

  

|   | molecular descriptor name | corr_value |
|---|---------------------------|------------|
| 0 | AATSOZ                    | 0.018677   |
| 1 | AATSOare                  | -0.341313  |
| 2 | AATSOd                    | -0.123443  |
| 3 | AATSOdv                   | -0.265670  |
| 4 | AATSOi                    | -0.428929  |

  

|   | molecular descriptor name | corr_value | absolute correlation value |
|---|---------------------------|------------|----------------------------|
| 0 | AATSOZ                    | 0.018677   | 0.018677                   |
| 1 | AATSOare                  | -0.341313  | 0.341313                   |
| 2 | AATSOd                    | -0.123443  | 0.123443                   |
| 3 | AATSOdv                   | -0.265670  | 0.265670                   |
| 4 | AATSOi                    | -0.428929  | 0.428929                   |

  

|     | molecular descriptor name | corr_value | absolute correlation value |
|-----|---------------------------|------------|----------------------------|
| 15  | AATS1i                    | -0.561620  | 0.561620                   |
| 113 | AATSC1c                   | 0.565682   | 0.565682                   |
| 125 | AATSC2c                   | -0.543393  | 0.543393                   |
| 221 | AETA_eta_R                | -0.515778  | 0.515778                   |
| 224 | AMID_C                    | 0.532458   | 0.532458                   |

  

|     | molecular descriptor name | corr_value | absolute correlation value |
|-----|---------------------------|------------|----------------------------|
| 15  | AATS1i                    | -0.561620  | 0.561620                   |
| 113 | AATSC1c                   | 0.565682   | 0.565682                   |
| 125 | AATSC2c                   | -0.543393  | 0.543393                   |
| 221 | AETA_eta_R                | -0.515778  | 0.515778                   |
| 224 | AMID_C                    | 0.532458   | 0.532458                   |

The model used is: SVR...

Return the coefficient of determination of the prediction:

-2.523256785292577

R<sup>2</sup> score: 0.4373249736417869

Correlation coefficient: 0.6613055070402687

Test data - unseen during training:

R<sup>2</sup> score: -2.523256785292577

Correlation coefficient: nan

[7.44854284 5.48027893 6.20963253 4.33885342 7.48930801 4.69193894

```

6.77880036 3.46726043 4.49318457 6.99322789 5.63355736 5.47588549
7.80390476 4.79277442 6.79565535 5.60811083]
8      6.159455
110    6.065502
69     5.552842
95     5.200659
11     7.250264
104    6.000000
52     6.823909
112    6.853872
101    5.000000
50     5.769551
100    6.136677
103    6.000000
21     6.398375
60     5.537602
84     7.002177
39     6.638272

```

Name: LoVo/DX, dtype: float64

Training Root Mean Square Error: 0.7191288863780737

Testing Root Mean Square Error: 1.1814687516044176

```

[39]: print(target_column_name+str('_transformed'))
      print(hist1[target_column_name].hist())

```

LoVo/DX\_transformed

AxesSubplot(0.125,0.11;0.775x0.77)

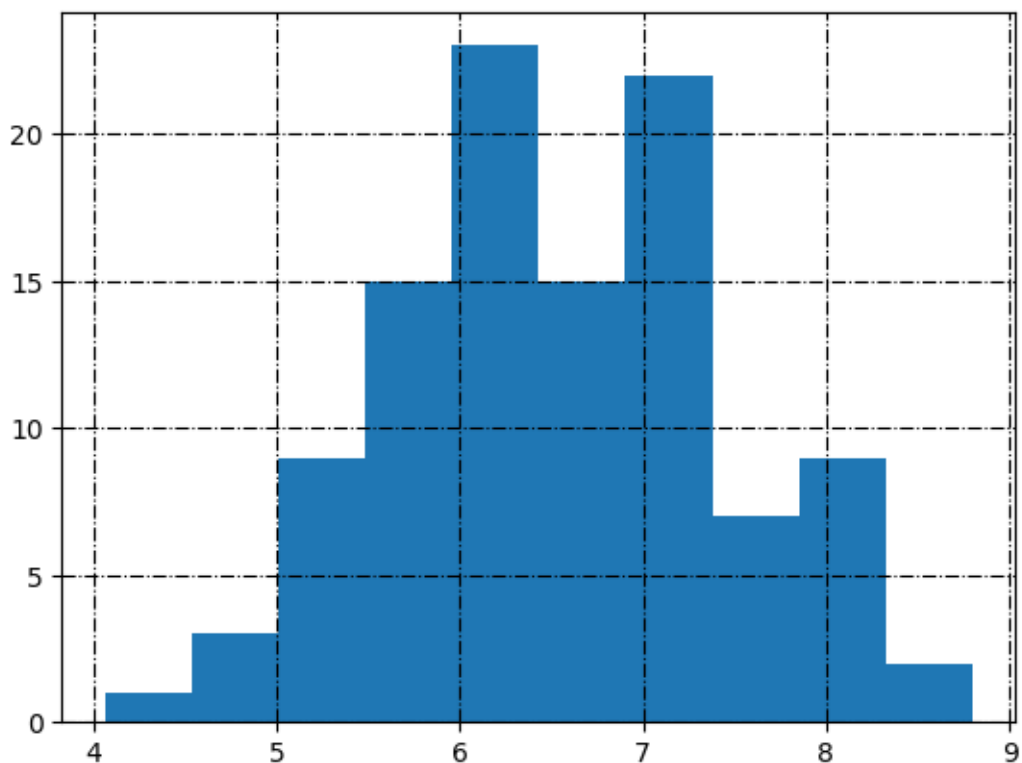

```
[40]: with_standardization, train_r2_, test_r2_, hist1, hist2, target_column_name,
      ↪ training_data_RMSE, test_data_RMSE = pred_model.
      ↪ prepare_data_and_create_model(molecular_descriptors_df=data,
      ↪
      ↪     correlation_threshold=0.50,
      ↪
      ↪     standardization=True,
      ↪
      ↪     model_type='SVR',
      ↪
      ↪     kernel_ = 'linear',
      ↪
      ↪     gamma_ = 'auto',
      ↪
      ↪     target_column_name = target,
      ↪
      ↪     random_state=random_state,
      ↪
      ↪     train_test_split_=True,
      ↪
      ↪     verbose=True)
```



I am doing standardization...

molecular descriptor name

0 AATSOZ

1 AATSOare

2 AATSOd

3 AATSOdv

4 AATSOi

molecular descriptor name corr\_value

0 AATSOZ 0.018677

1 AATSOare -0.341313

2 AATSOd -0.123443

3 AATSOdv -0.265670

4 AATSOi -0.428929

molecular descriptor name corr\_value absolute correlation value

0 AATSOZ 0.018677 0.018677

1 AATSOare -0.341313 0.341313

2 AATSOd -0.123443 0.123443

3 AATSOdv -0.265670 0.265670

4 AATSOi -0.428929 0.428929

molecular descriptor name corr\_value absolute correlation value

15 AATS1i -0.561620 0.561620

113 AATSC1c 0.565682 0.565682

125 AATSC2c -0.543393 0.543393

221 AETA\_eta\_R -0.515778 0.515778

224 AMID\_C 0.532458 0.532458

molecular descriptor name corr\_value absolute correlation value

15 AATS1i -0.561620 0.561620

113 AATSC1c 0.565682 0.565682

125 AATSC2c -0.543393 0.543393

221 AETA\_eta\_R -0.515778 0.515778

224 AMID\_C 0.532458 0.532458

The model used is: SVR...

Return the coefficient of determination of the prediction:

-2.523256785292577

R<sup>2</sup> score: 0.4373249736417869

Correlation coefficient: 0.6613055070402687

Test data - unseen during training:

R<sup>2</sup> score: -2.523256785292577

Correlation coefficient: nan

[7.44854284 5.48027893 6.20963253 4.33885342 7.48930801 4.69193894

6.77880036 3.46726043 4.49318457 6.99322789 5.63355736 5.47588549

7.80390476 4.79277442 6.79565535 5.60811083]

8 6.159455

110 6.065502

69 5.552842

95 5.200659

11 7.250264

104 6.000000

```

52      6.823909
112     6.853872
101     5.000000
50      5.769551
100     6.136677
103     6.000000
21      6.398375
60      5.537602
84      7.002177
39      6.638272

```

Name: LoVo/DX, dtype: float64

Training Root Mean Square Error: 0.7191288863780737

Testing Root Mean Square Error: 1.1814687516044176

## 5.1 Search inside correlation space

```

[41]: step = 0.01
      initial_step = corr_low
      last_step = corr_high
      first_list = [x / 100.0 for x in range(int(initial_step*100),
      ↪int(last_step*100), int(step*100))]
      second_list = []
      third_list = []
      fourth_l = []
      fifth_l = []
      f_list = []
      for i in first_list:
          without_standardization, train_r2, test_r2, _, h_, target_column_name,
          ↪training_data_RMSE, test_data_RMSE = pred_model.
          ↪prepare_data_and_create_model(molecular_descriptors_df = data,

          ↪correlation_threshold = i,

          ↪standardization = False,

          ↪model_type = 'SVR',

          ↪kernel_ = 'linear',

          ↪gamma_ = 'auto',

          ↪target_column_name = target,

          ↪random_state=random_state,

          ↪train_test_split_ = True,

```

```

        verbose = False)
    second_list.append(train_r2)
    third_list.append(test_r2)
    fourth_l.append(training_data_RMSE)
    fifth_l.append(test_data_RMSE)
    f_list.append(len(h_))

```

```

[42]: df_without_standardization = pd.DataFrame(data=first_list,
        ↪columns=["Correlation threshold"])
df_without_standardization['Training data R^2 score'] = second_list
df_without_standardization['Test data R^2 score'] = third_list
df_without_standardization['Training RMSE'] = fourth_l
df_without_standardization['Test RMSE'] = fifth_l
df_without_standardization['Number of features'] = f_list

```

```

[43]: df_svm = df_without_standardization.copy()
df_without_standardization

```

```

[43]:
Correlation threshold  Training data R^2 score  Test data R^2 score \
0                    0.33          -4.960511e+06          -1.795669e+07
1                    0.34          -4.592888e+06          -2.802811e+07
2                    0.35          -2.716580e+06          -1.402362e+07
3                    0.36          -1.101852e+06          -8.556822e+06
4                    0.37          -1.976878e+06          -7.256922e+06
5                    0.38          -7.107772e+05          -6.998006e+06
6                    0.39          -3.252029e+05          -1.124577e+06
7                    0.40          -7.844252e+05          -1.621615e+06
8                    0.41          -2.861919e+05          -1.117552e+06
9                    0.42          -1.170156e+04          -5.464849e+04
10                   0.43          -1.484455e+04          -3.463573e+04
11                   0.44          -7.682337e+03          -4.605611e+04
12                   0.45          -1.851702e+04          -3.703248e+04
13                   0.46          -2.978199e+03          -1.176859e+04
14                   0.47          -2.577781e+03          -6.833001e+03
15                   0.48          -2.392096e-01          -7.487001e+00
16                   0.49           2.651193e-01          -2.416547e+00
17                   0.50           4.373250e-01          -2.523257e+00
18                   0.51           6.085918e-01          -1.184967e+00
19                   0.52           4.782530e-01          -4.737919e-01
20                   0.53           6.339387e-01           2.596838e-01
21                   0.54           5.897526e-01          -1.577834e-01
22                   0.55           6.150073e-01           8.649615e-02
23                   0.56           5.926614e-01          -3.633828e-01
24                   0.57           5.822633e-01          -2.183953e-01
25                   0.58           5.622460e-01          -5.939987e-01
26                   0.59           5.591630e-01          -6.209359e-01

```

|    |      |              |               |
|----|------|--------------|---------------|
| 27 | 0.60 | 5.506998e-01 | -4.375144e-01 |
| 28 | 0.61 | 5.506998e-01 | -4.375144e-01 |
| 29 | 0.62 | 5.506998e-01 | -4.375144e-01 |
| 30 | 0.63 | 5.261065e-01 | -2.547599e-01 |

|    | Training RMSE | Test RMSE   | Number of features |
|----|---------------|-------------|--------------------|
| 0  | 2135.212850   | 2667.247166 | 527                |
| 1  | 2054.569717   | 3332.322578 | 512                |
| 2  | 1580.117033   | 2357.111448 | 487                |
| 3  | 1006.328218   | 1841.222849 | 455                |
| 4  | 1347.932090   | 1695.611466 | 435                |
| 5  | 808.248633    | 1665.088300 | 399                |
| 6  | 546.708466    | 667.490194  | 377                |
| 7  | 849.090439    | 801.538002  | 343                |
| 8  | 512.870078    | 665.402160  | 290                |
| 9  | 103.709452    | 147.144200  | 245                |
| 10 | 116.808945    | 117.143590  | 203                |
| 11 | 84.033576     | 135.082296  | 143                |
| 12 | 130.459332    | 121.128789  | 111                |
| 13 | 52.327217     | 68.285852   | 94                 |
| 14 | 48.683877     | 52.034048   | 83                 |
| 15 | 1.067211      | 1.833695    | 69                 |
| 16 | 0.821838      | 1.163439    | 60                 |
| 17 | 0.719129      | 1.181469    | 50                 |
| 18 | 0.599781      | 0.930406    | 46                 |
| 19 | 0.692481      | 0.764132    | 41                 |
| 20 | 0.580036      | 0.541575    | 32                 |
| 21 | 0.614046      | 0.677273    | 25                 |
| 22 | 0.594845      | 0.601596    | 21                 |
| 23 | 0.611865      | 0.734952    | 16                 |
| 24 | 0.619625      | 0.694775    | 12                 |
| 25 | 0.634297      | 0.794683    | 9                  |
| 26 | 0.636527      | 0.801370    | 8                  |
| 27 | 0.642608      | 0.754668    | 7                  |
| 28 | 0.642608      | 0.754668    | 7                  |
| 29 | 0.642608      | 0.754668    | 7                  |
| 30 | 0.659961      | 0.705067    | 5                  |

## 5.2 Plots

```
[44]: plt.plot(df_without_standardization['Correlation threshold'],
             df_without_standardization['Training data R^2 score'], label = "Training
             data R^2 score", marker='v')
plt.plot(df_without_standardization['Correlation threshold'],
             df_without_standardization['Test data R^2 score'], label = "Test data R^2
             score", marker='D')
plt.legend()
```

```
plt.xlabel('Correlation threshold')
plt.ylabel('R^2 score')
plt.ylim([0, 1])
plt.show()
```

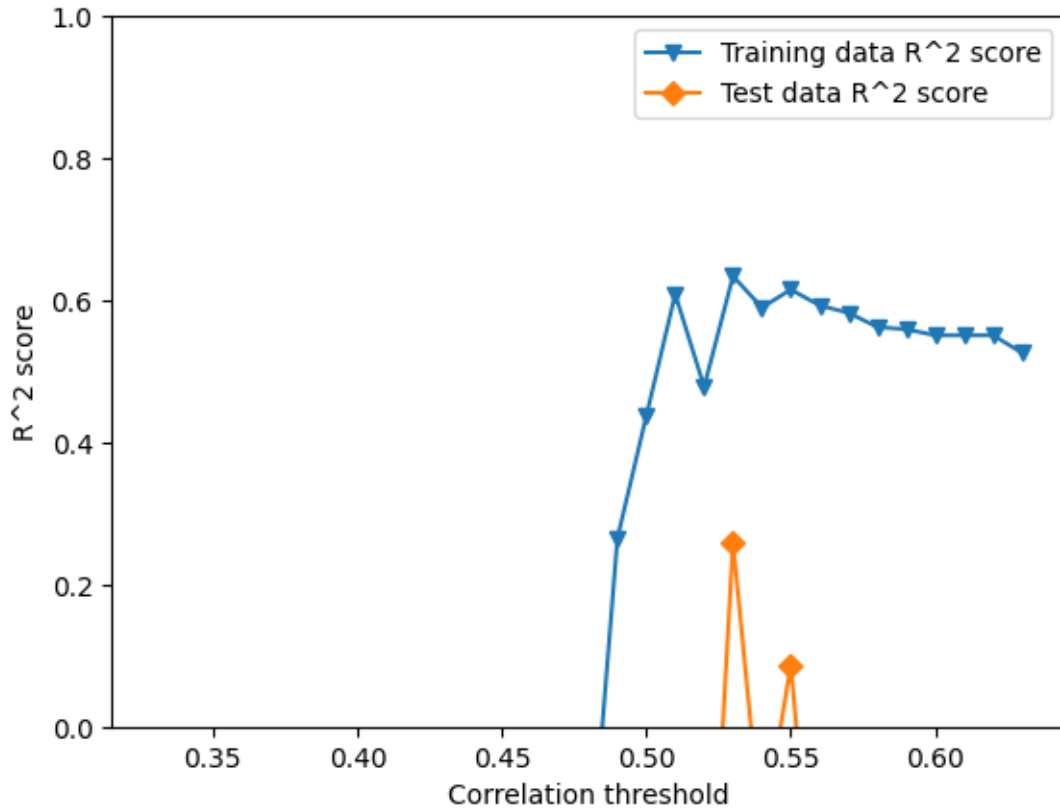

```
[45]: plt.plot(df_without_standardization['Correlation threshold'],  
             df_without_standardization['Number of features'], label = "Number of  
             features", marker='.')  
plt.legend()  
plt.xlabel('Correlation threshold')  
plt.ylabel('Number of features')  
plt.show()
```

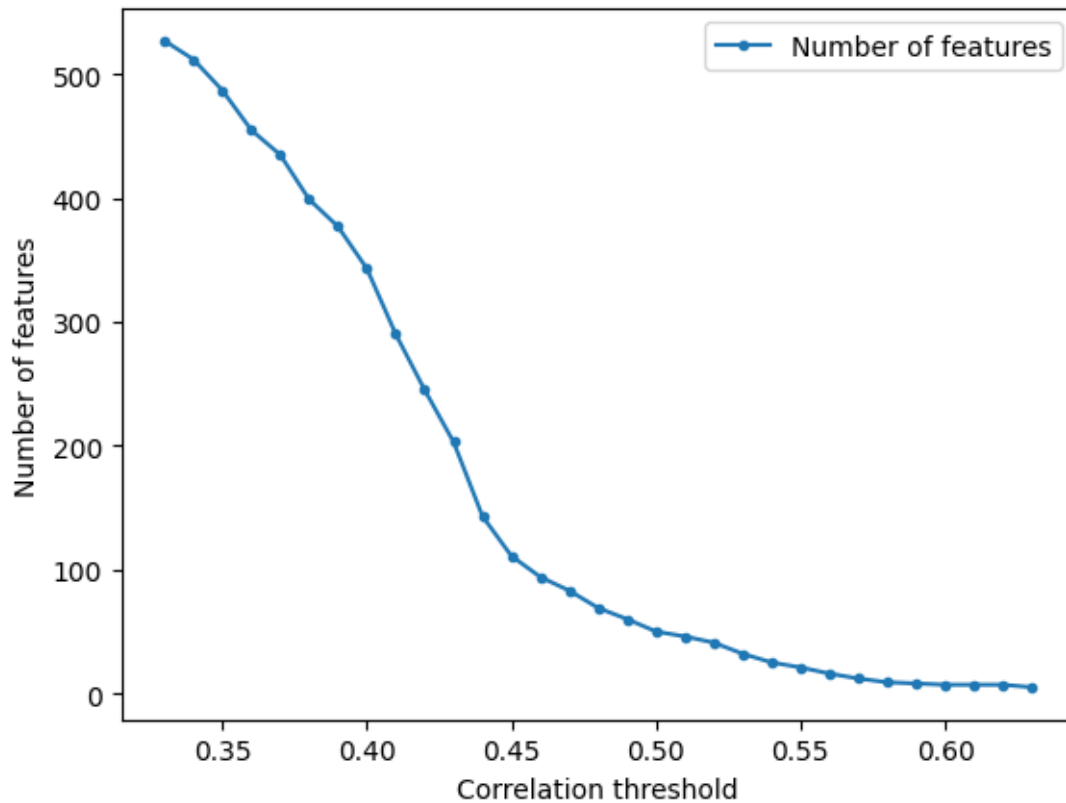

### 5.3 Store quality measurements

```
[46]: with pd.ExcelWriter('../Data/Quality_'+LoVo_DX+'_'+str(random_state)+'_'.
      ↪xlsx') as writer:
      df_linear.to_excel(writer, sheet_name='MLR')
      df_decision_tree.to_excel(writer, sheet_name='DT')
      df_random_forest.to_excel(writer, sheet_name='RF')
      df_k_nearest.to_excel(writer, sheet_name='KNN')
      df_svm.to_excel(writer, sheet_name='SVM')
```

# Notebook

January 18, 2024

## 1 File 22

```
[1]: import sys
from pathlib import Path
prediction_mode_path = Path("../module")
sys.path.append(prediction_mode_path.as_posix())
import models_creation as pred_model

import pandas as pd
import numpy as np

from sklearn.metrics import r2_score

import matplotlib.pyplot as plt
from sklearn.tree import plot_tree

from matplotlib import pyplot as plt

import joblib

import warnings
warnings.filterwarnings('ignore')
```

```
[2]: load_prepared_data = pd.read_excel('../Data/Kolchicyna_machine_learning.xlsx')
load_prepared_data = load_prepared_data.drop(columns=['Unnamed: 0'])

target = 'LoVo/DX'

corr_low = 0.33
corr_high = 0.64

random_state = 28
```

```
[3]: load_prepared_data.head()
```

```
[3]:      AATSOZ  AATSOare  AATSOd  AATSOdv  AATSOi  AATSOm  AATSOp  \
0  25.090909  6.046518  3.109091  6.662626  160.775045  99.075564  1.555512
1  24.448276  6.008422  3.051724  6.386973  161.021674  96.473315  1.538471
```

|   |           |          |          |          |            |           |          |
|---|-----------|----------|----------|----------|------------|-----------|----------|
| 2 | 23.868852 | 5.974074 | 3.000000 | 6.138434 | 161.244045 | 94.127025 | 1.523105 |
| 3 | 23.868852 | 5.974074 | 3.032787 | 6.171220 | 161.244045 | 94.127025 | 1.523105 |
| 4 | 23.343750 | 5.942945 | 2.953125 | 5.913194 | 161.445569 | 92.000700 | 1.509180 |

|   | AATS0pe  | AATS0s   | AATS0se  | ... | A549_float | MCF-7_float | LoVo_float | \ |
|---|----------|----------|----------|-----|------------|-------------|------------|---|
| 0 | 6.126680 | 3.435416 | 7.629859 | ... | 10.8       | 10.3        | 6.5        |   |
| 1 | 6.088791 | 3.330998 | 7.596891 | ... | 11.6       | 12.0        | 8.5        |   |
| 2 | 6.054630 | 3.236850 | 7.567166 | ... | 10.9       | 12.2        | 8.8        |   |
| 3 | 6.054630 | 3.257798 | 7.567166 | ... | 10.5       | 11.3        | 8.5        |   |
| 4 | 6.023670 | 3.151529 | 7.540228 | ... | 89.5       | 92.7        | 52.8       |   |

|   | LoVo/DX_float | BALB/3T3_float | A549_float_transformed | \ |
|---|---------------|----------------|------------------------|---|
| 0 | 54.9          | 10.2           | 7.966576               |   |
| 1 | 31.1          | 14.3           | 7.935542               |   |
| 2 | 17.9          | 11.7           | 7.962574               |   |
| 3 | 10.2          | 11.0           | 7.978811               |   |
| 4 | 77.8          | 99.4           | 7.048177               |   |

|   | MCF-7_float_transformed | LoVo_float_transformed | LoVo/DX_float_transformed | \ |
|---|-------------------------|------------------------|---------------------------|---|
| 0 | 7.987163                | 8.187087               | 7.260428                  |   |
| 1 | 7.920819                | 8.070581               | 7.507240                  |   |
| 2 | 7.913640                | 8.055517               | 7.747147                  |   |
| 3 | 7.946922                | 8.070581               | 7.991400                  |   |
| 4 | 7.032920                | 7.277366               | 7.109020                  |   |

|   | BALB/3T3_float_transformed |
|---|----------------------------|
| 0 | 7.991400                   |
| 1 | 7.844664                   |
| 2 | 7.931814                   |
| 3 | 7.958607                   |
| 4 | 7.002614                   |

[5 rows x 1221 columns]

```
[4]: data = load_prepared_data[list(load_prepared_data.columns)[0:-10]]
data[target] = load_prepared_data[load_prepared_data.columns[-2]]
data.head()
```

|   | AATS0Z    | AATS0are | AATS0d   | AATS0dv  | AATS0i     | AATS0m    | AATS0p   | \ |
|---|-----------|----------|----------|----------|------------|-----------|----------|---|
| 0 | 25.090909 | 6.046518 | 3.109091 | 6.662626 | 160.775045 | 99.075564 | 1.555512 |   |
| 1 | 24.448276 | 6.008422 | 3.051724 | 6.386973 | 161.021674 | 96.473315 | 1.538471 |   |
| 2 | 23.868852 | 5.974074 | 3.000000 | 6.138434 | 161.244045 | 94.127025 | 1.523105 |   |
| 3 | 23.868852 | 5.974074 | 3.032787 | 6.171220 | 161.244045 | 94.127025 | 1.523105 |   |
| 4 | 23.343750 | 5.942945 | 2.953125 | 5.913194 | 161.445569 | 92.000700 | 1.509180 |   |

|   | AATS0pe  | AATS0s   | AATS0se  | ... | piPC10   | piPC2    | piPC3    | piPC4    | \ |
|---|----------|----------|----------|-----|----------|----------|----------|----------|---|
| 0 | 6.126680 | 3.435416 | 7.629859 | ... | 7.999655 | 4.266195 | 4.915408 | 5.516700 |   |



|   |          |          |          |     |          |          |          |          |
|---|----------|----------|----------|-----|----------|----------|----------|----------|
| 1 | 6.088791 | 3.330998 | 7.596891 | ... | 8.018726 | 4.280132 | 4.922714 | 5.520711 |
| 2 | 6.054630 | 3.236850 | 7.567166 | ... | 8.028799 | 4.293878 | 4.929967 | 5.524706 |
| 3 | 6.054630 | 3.257798 | 7.567166 | ... | 8.037440 | 4.307438 | 4.929967 | 5.524706 |
| 4 | 6.023670 | 3.151529 | 7.540228 | ... | 8.034892 | 4.307438 | 4.937168 | 5.528685 |

|   | piPC5    | piPC6    | piPC7    | piPC8    | piPC9    | LoVo/DX  |
|---|----------|----------|----------|----------|----------|----------|
| 0 | 6.098566 | 6.595759 | 6.979116 | 7.337313 | 7.681445 | 7.260428 |
| 1 | 6.103048 | 6.601209 | 6.985613 | 7.349442 | 7.695531 | 7.507240 |
| 2 | 6.105281 | 6.603923 | 6.989306 | 7.353932 | 7.704023 | 7.747147 |
| 3 | 6.107510 | 6.606629 | 6.992068 | 7.361425 | 7.709420 | 7.991400 |
| 4 | 6.107510 | 6.605277 | 6.991148 | 7.356489 | 7.707175 | 7.109020 |

[5 rows x 1212 columns]

```
[5]: print(data.shape)
data = data.dropna()
data.shape
```

(120, 1212)

[5]: (106, 1212)

## 2 Multiple Linear regression (MLR)

```
[6]: without_standardization, train_r2_, test_r2_, hist1, hist2, target_column_name,
      ↪ training_data_RMSE, test_data_RMSE = pred_model.
      ↪ prepare_data_and_create_model(molecular_descriptors_df=data,
      ↪
      ↪ correlation_threshold=0.5,
      ↪
      ↪ standardization=False,
      ↪
      ↪ model_type='linear_model',
      ↪
      ↪ target_column_name = str(target),
      ↪
      ↪ random_state=random_state,
      ↪
      ↪ train_test_split_=True,
      ↪
      ↪ verbose=True)
```

I am not doing standardization...

|   | molecular descriptor name |
|---|---------------------------|
| 0 | AATS0Z                    |
| 1 | AATS0are                  |
| 2 | AATS0d                    |

|     |                           |            |                            |
|-----|---------------------------|------------|----------------------------|
| 3   | AATS0dv                   |            |                            |
| 4   | AATS0i                    |            |                            |
|     | molecular descriptor name | corr_value |                            |
| 0   | AATS0Z                    | 0.018677   |                            |
| 1   | AATS0are                  | -0.341313  |                            |
| 2   | AATS0d                    | -0.123443  |                            |
| 3   | AATS0dv                   | -0.265670  |                            |
| 4   | AATS0i                    | -0.428929  |                            |
|     | molecular descriptor name | corr_value | absolute correlation value |
| 0   | AATS0Z                    | 0.018677   | 0.018677                   |
| 1   | AATS0are                  | -0.341313  | 0.341313                   |
| 2   | AATS0d                    | -0.123443  | 0.123443                   |
| 3   | AATS0dv                   | -0.265670  | 0.265670                   |
| 4   | AATS0i                    | -0.428929  | 0.428929                   |
|     | molecular descriptor name | corr_value | absolute correlation value |
| 15  | AATS1i                    | -0.561620  | 0.561620                   |
| 113 | AATSC1c                   | 0.565682   | 0.565682                   |
| 125 | AATSC2c                   | -0.543393  | 0.543393                   |
| 221 | AETA_eta_R                | -0.515778  | 0.515778                   |
| 224 | AMID_C                    | 0.532458   | 0.532458                   |
|     | molecular descriptor name | corr_value | absolute correlation value |
| 15  | AATS1i                    | -0.561620  | 0.561620                   |
| 113 | AATSC1c                   | 0.565682   | 0.565682                   |
| 125 | AATSC2c                   | -0.543393  | 0.543393                   |
| 221 | AETA_eta_R                | -0.515778  | 0.515778                   |
| 224 | AMID_C                    | 0.532458   | 0.532458                   |

The model used is: LinearReg..

Return the coefficient of determination of the prediction:

0.38194140242409325

R<sup>2</sup> score: 0.913512128719289

Correlation coefficient: 0.9557782842894522

Test data - unseen during training:

R<sup>2</sup> score: 0.38194140242409325

Correlation coefficient: 0.6180140794707619

[7.97579884 7.0905308 5.36603678 5.89422187 7.28795085 7.20347708  
6.59870244 6.26151974 7.24574584 5.50629637 5.58010257 5.56370147  
6.57097459 6.86947166 7.10432563 7.53364675]

|     |          |
|-----|----------|
| 0   | 7.260428 |
| 21  | 6.398375 |
| 106 | 5.853872 |
| 68  | 6.080922 |
| 44  | 7.638272 |
| 14  | 7.067526 |
| 108 | 6.154902 |
| 62  | 6.455932 |
| 13  | 7.158641 |
| 9   | 5.702436 |
| 96  | 5.136677 |

```

49      5.619789
54      7.075721
114     6.026872
115     5.568636
87      7.288193
Name: LoVo/DX, dtype: float64
Training Root Mean Square Error: 0.28248558630659193
Testing Root Mean Square Error: 0.5738467398009358

```

```

[7]: print(target_column_name+str('_transformed'))
      print(hist1[target_column_name].hist())

```

```

LoVo/DX_transformed
AxesSubplot(0.125,0.11;0.775x0.77)

```



```

[8]: with_standardization, train_r2_, test_r2_, hist1, hist2, target_column_name,
      ↪ training_data_RMSE, test_data_RMSE = pred_model.
      ↪ prepare_data_and_create_model(molecular_descriptors_df=data,
      ↪
      ↪ correlation_threshold=0.50,
      ↪
      ↪ standardization=True,

```

```

↪      model_type='linear_model',
↪
↪      target_column_name = target,
↪
↪      random_state=random_state,
↪
↪      train_test_split_=True,
↪
↪      verbose=True)

```

I am doing standardization...

|   | molecular descriptor name |  |
|---|---------------------------|--|
| 0 | AATS0Z                    |  |
| 1 | AATS0are                  |  |
| 2 | AATS0d                    |  |
| 3 | AATS0dv                   |  |
| 4 | AATS0i                    |  |

  

|   | molecular descriptor name | corr_value |
|---|---------------------------|------------|
| 0 | AATS0Z                    | 0.018677   |
| 1 | AATS0are                  | -0.341313  |
| 2 | AATS0d                    | -0.123443  |
| 3 | AATS0dv                   | -0.265670  |
| 4 | AATS0i                    | -0.428929  |

  

|   | molecular descriptor name | corr_value | absolute correlation value |
|---|---------------------------|------------|----------------------------|
| 0 | AATS0Z                    | 0.018677   | 0.018677                   |
| 1 | AATS0are                  | -0.341313  | 0.341313                   |
| 2 | AATS0d                    | -0.123443  | 0.123443                   |
| 3 | AATS0dv                   | -0.265670  | 0.265670                   |
| 4 | AATS0i                    | -0.428929  | 0.428929                   |

  

|     | molecular descriptor name | corr_value | absolute correlation value |
|-----|---------------------------|------------|----------------------------|
| 15  | AATS1i                    | -0.561620  | 0.561620                   |
| 113 | AATSC1c                   | 0.565682   | 0.565682                   |
| 125 | AATSC2c                   | -0.543393  | 0.543393                   |
| 221 | AETA_eta_R                | -0.515778  | 0.515778                   |
| 224 | AMID_C                    | 0.532458   | 0.532458                   |

  

|     | molecular descriptor name | corr_value | absolute correlation value |
|-----|---------------------------|------------|----------------------------|
| 15  | AATS1i                    | -0.561620  | 0.561620                   |
| 113 | AATSC1c                   | 0.565682   | 0.565682                   |
| 125 | AATSC2c                   | -0.543393  | 0.543393                   |
| 221 | AETA_eta_R                | -0.515778  | 0.515778                   |
| 224 | AMID_C                    | 0.532458   | 0.532458                   |

The model used is: LinearReg...

Return the coefficient of determination of the prediction:

0.38194140242409325

R<sup>2</sup> score: 0.913512128719289

Correlation coefficient: 0.9557782842894522

Test data - unseen during training:

R<sup>2</sup> score: 0.38194140242409325

Correlation coefficient: 0.6180140794707619

[7.97579884 7.0905308 5.36603678 5.89422187 7.28795085 7.20347708  
6.59870244 6.26151974 7.24574584 5.50629637 5.58010257 5.56370147  
6.57097459 6.86947166 7.10432563 7.53364675]

0 7.260428

21 6.398375

106 5.853872

68 6.080922

44 7.638272

14 7.067526

108 6.154902

62 6.455932

13 7.158641

9 5.702436

96 5.136677

49 5.619789

54 7.075721

114 6.026872

115 5.568636

87 7.288193

Name: LoVo/DX, dtype: float64

Training Root Mean Square Error: 0.28248558630659193

Testing Root Mean Square Error: 0.5738467398009358

## 2.1 Search inside correlation space

```
[9]: step = 0.01
initial_step = corr_low
last_step = corr_high
first_list = [x / 100.0 for x in range(int(initial_step*100),
    ↪int(last_step*100), int(step*100))]
second_list = []
third_list = []
fourth_l = []
fifth_l = []
f_list = []
for i in first_list:
    without_standardization, train_r2, test_r2, _, h_, target_column_name,
    ↪training_data_RMSE, test_data_RMSE = pred_model.
    ↪prepare_data_and_create_model(molecular_descriptors_df = data,

    ↪correlation_threshold = i,

    ↪standardization = False,
```

```

↪          model_type = 'linear_model',
↪          target_column_name = target,
↪          random_state=random_state,
↪          train_test_split_ = True,
↪          verbose = False)
second_list.append(train_r2)
third_list.append(test_r2)
fourth_l.append(training_data_RMSE)
fifth_l.append(test_data_RMSE)
f_list.append(len(h_))

```

```

[10]: df_without_standardization = pd.DataFrame(data=first_list,
↪       columns=["Correlation threshold"])
df_without_standardization['Training data R^2 score'] = second_list
df_without_standardization['Test data R^2 score'] = third_list
df_without_standardization['Training RMSE'] = fourth_l
df_without_standardization['Test RMSE'] = fifth_l
df_without_standardization['Number of features'] = f_list

```

```

[11]: df_linear = df_without_standardization.copy()
df_without_standardization

```

```

[11]:      Correlation threshold  Training data R^2 score  Test data R^2 score  \
0                0.33          0.999995          -7.717586
1                0.34          0.999995         -17.705554
2                0.35          0.999995         -12.720189
3                0.36          0.999995         -12.664929
4                0.37          0.999995         -20.965912
5                0.38          0.999995          -9.069472
6                0.39          0.999995         -21.678945
7                0.40          0.999995         -55.826234
8                0.41          0.999995         -32.687912
9                0.42          0.999995         -58.812134
10               0.43          0.999995         -52.472414
11               0.44          0.999995         -47.502059
12               0.45          0.999995        -166.634213
13               0.46          0.999995        -181.086352
14               0.47          0.993457         -18.140887
15               0.48          0.977801          -1.079957
16               0.49          0.970173          -1.786014
17               0.50          0.913512           0.381941
18               0.51          0.908500           0.456065

```

|    |      |          |          |
|----|------|----------|----------|
| 19 | 0.52 | 0.902100 | 0.436965 |
| 20 | 0.53 | 0.882822 | 0.413697 |
| 21 | 0.54 | 0.798473 | 0.274696 |
| 22 | 0.55 | 0.774569 | 0.328369 |
| 23 | 0.56 | 0.766363 | 0.375148 |
| 24 | 0.57 | 0.718837 | 0.351858 |
| 25 | 0.58 | 0.699977 | 0.364561 |
| 26 | 0.59 | 0.699240 | 0.346213 |
| 27 | 0.60 | 0.699234 | 0.349604 |
| 28 | 0.61 | 0.699234 | 0.349604 |
| 29 | 0.62 | 0.699234 | 0.349604 |
| 30 | 0.63 | 0.557435 | 0.094863 |

|    | Training RMSE | Test RMSE | Number of features |
|----|---------------|-----------|--------------------|
| 0  | 0.002233      | 2.155158  | 527                |
| 1  | 0.002233      | 3.156940  | 512                |
| 2  | 0.002233      | 2.703716  | 487                |
| 3  | 0.002233      | 2.698266  | 455                |
| 4  | 0.002233      | 3.421021  | 435                |
| 5  | 0.002233      | 2.316245  | 399                |
| 6  | 0.002233      | 3.476102  | 377                |
| 7  | 0.002233      | 5.502443  | 343                |
| 8  | 0.002233      | 4.236607  | 290                |
| 9  | 0.002233      | 5.645153  | 245                |
| 10 | 0.002233      | 5.337600  | 203                |
| 11 | 0.002233      | 5.083481  | 143                |
| 12 | 0.002233      | 9.450666  | 111                |
| 13 | 0.002233      | 9.849627  | 94                 |
| 14 | 0.077700      | 3.193465  | 83                 |
| 15 | 0.143115      | 1.052709  | 69                 |
| 16 | 0.165892      | 1.218352  | 60                 |
| 17 | 0.282486      | 0.573847  | 50                 |
| 18 | 0.290556      | 0.538337  | 46                 |
| 19 | 0.300545      | 0.547708  | 41                 |
| 20 | 0.328807      | 0.558910  | 32                 |
| 21 | 0.431206      | 0.621643  | 25                 |
| 22 | 0.456063      | 0.598200  | 21                 |
| 23 | 0.464290      | 0.576992  | 16                 |
| 24 | 0.509328      | 0.587646  | 12                 |
| 25 | 0.526133      | 0.581860  | 9                  |
| 26 | 0.526779      | 0.590200  | 8                  |
| 27 | 0.526785      | 0.588668  | 7                  |
| 28 | 0.526785      | 0.588668  | 7                  |
| 29 | 0.526785      | 0.588668  | 7                  |
| 30 | 0.639009      | 0.694446  | 5                  |

[ ]:

## 2.2 Plots

```
[12]: plt.plot(df_without_standardization['Correlation threshold'],  
             df_without_standardization['Training data R^2 score'], label = "Training_  
             data R^2 score", marker='v')  
plt.plot(df_without_standardization['Correlation threshold'],  
         df_without_standardization['Test data R^2 score'], label = "Test data R^2_  
         score", marker='D')  
plt.legend()  
plt.xlabel('Correlation threshold')  
plt.ylabel('R^2 score')  
plt.ylim([0, 1])  
plt.show()
```

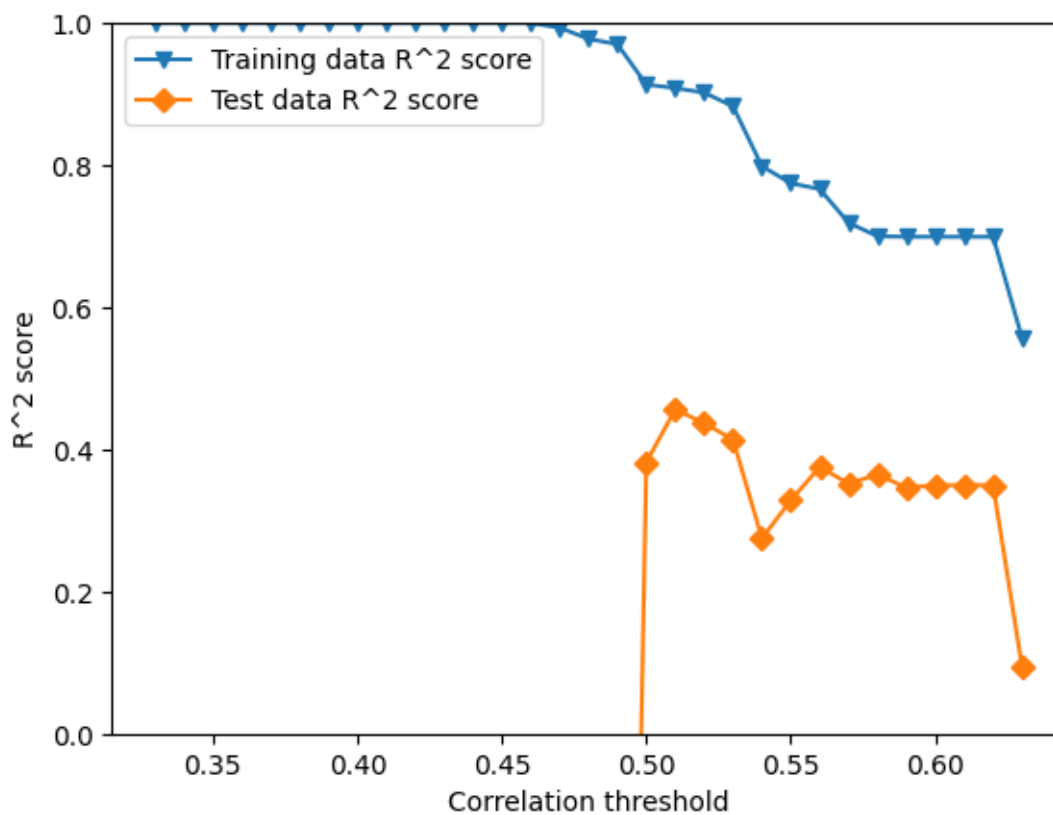

```
[13]: plt.plot(df_without_standardization['Correlation threshold'],  
             df_without_standardization['Number of features'], label = "Number of_  
             features", marker='.')  
plt.legend()  
plt.xlabel('Correlation threshold')  
plt.ylabel('Number of features')  
plt.show()
```





[ ]:

## 2.3 Decision Tree

```
[14]: without_standardization, train_r2_, test_r2_, hist1, hist2, target_column_name,
      ↪ training_data_RMSE, test_data_RMSE = pred_model.
      ↪ prepare_data_and_create_model(molecular_descriptors_df=data,
      ↪
      ↪         correlation_threshold=0.50,
      ↪
      ↪         standardization=False,
      ↪
      ↪         model_type='DecisionTreeRegressor',
      ↪
      ↪         max_depth=5,
      ↪
      ↪         target_column_name = target,
      ↪
      ↪         random_state=random_state,
```

```

↪          train_test_split_=True,
↪          verbose=True)

```

I am not doing standardization...

|   | molecular descriptor name |  |
|---|---------------------------|--|
| 0 | AATSOZ                    |  |
| 1 | AATSOare                  |  |
| 2 | AATSOd                    |  |
| 3 | AATSOdv                   |  |
| 4 | AATSOi                    |  |

  

|   | molecular descriptor name | corr_value |
|---|---------------------------|------------|
| 0 | AATSOZ                    | 0.018677   |
| 1 | AATSOare                  | -0.341313  |
| 2 | AATSOd                    | -0.123443  |
| 3 | AATSOdv                   | -0.265670  |
| 4 | AATSOi                    | -0.428929  |

  

|   | molecular descriptor name | corr_value | absolute correlation value |
|---|---------------------------|------------|----------------------------|
| 0 | AATSOZ                    | 0.018677   | 0.018677                   |
| 1 | AATSOare                  | -0.341313  | 0.341313                   |
| 2 | AATSOd                    | -0.123443  | 0.123443                   |
| 3 | AATSOdv                   | -0.265670  | 0.265670                   |
| 4 | AATSOi                    | -0.428929  | 0.428929                   |

  

|     | molecular descriptor name | corr_value | absolute correlation value |
|-----|---------------------------|------------|----------------------------|
| 15  | AATS1i                    | -0.561620  | 0.561620                   |
| 113 | AATSC1c                   | 0.565682   | 0.565682                   |
| 125 | AATSC2c                   | -0.543393  | 0.543393                   |
| 221 | AETA_eta_R                | -0.515778  | 0.515778                   |
| 224 | AMID_C                    | 0.532458   | 0.532458                   |

  

|     | molecular descriptor name | corr_value | absolute correlation value |
|-----|---------------------------|------------|----------------------------|
| 15  | AATS1i                    | -0.561620  | 0.561620                   |
| 113 | AATSC1c                   | 0.565682   | 0.565682                   |
| 125 | AATSC2c                   | -0.543393  | 0.543393                   |
| 221 | AETA_eta_R                | -0.515778  | 0.515778                   |
| 224 | AMID_C                    | 0.532458   | 0.532458                   |

The model used is: DecisionTree...

Return the coefficient of determination of the prediction:

-0.23724984274096572

R<sup>2</sup> score: 0.9282999207105779

Correlation coefficient: 0.9634832228485236

Test data - unseen during training:

R<sup>2</sup> score: -0.23724984274096572

Correlation coefficient: nan

[7.68211241 6.87506153 5.64717667 6.64290682 6.87506153 7.37986395  
7.37986395 6.04720533 7.37986395 6.87506153 5.64717667 5.64717667  
6.64290682 7.37986395 7.37986395 7.96066227]

0 7.260428

```

21      6.398375
106     5.853872
68      6.080922
44      7.638272
14      7.067526
108     6.154902
62      6.455932
13      7.158641
9       5.702436
96      5.136677
49      5.619789
54      7.075721
114     6.026872
115     5.568636
87      7.288193

```

Name: LoVo/DX, dtype: float64

Training Root Mean Square Error: 0.2572044670564493

Testing Root Mean Square Error: 0.8119135627476753

```

[15]: print(target_column_name+str('_transformed'))
      print(hist1[target_column_name].hist())

```

LoVo/DX\_transformed

AxesSubplot(0.125,0.11;0.775x0.77)



```
[16]: with_standardization, train_r2_, test_r2_, hist1, hist2, target_column_name,
      ↪ training_data_RMSE, test_data_RMSE = pred_model.
      ↪ prepare_data_and_create_model(molecular_descriptors_df=data,
      ↪
      ↪         correlation_threshold=0.50,
      ↪
      ↪         standardization=True,
      ↪
      ↪         model_type='DecisionTreeRegressor',
      ↪
      ↪         max_depth=5,
      ↪
      ↪         target_column_name = target,
      ↪
      ↪         random_state=random_state,
      ↪
      ↪         train_test_split_=True,
      ↪
      ↪         verbose=True)
```

I am doing standardization...

|   | molecular descriptor name |  |
|---|---------------------------|--|
| 0 | AATSOZ                    |  |
| 1 | AATSOare                  |  |
| 2 | AATSOd                    |  |
| 3 | AATSOdv                   |  |
| 4 | AATSOi                    |  |

  

|   | molecular descriptor name | corr_value |
|---|---------------------------|------------|
| 0 | AATSOZ                    | 0.018677   |
| 1 | AATSOare                  | -0.341313  |
| 2 | AATSOd                    | -0.123443  |
| 3 | AATSOdv                   | -0.265670  |
| 4 | AATSOi                    | -0.428929  |

  

|   | molecular descriptor name | corr_value | absolute correlation value |
|---|---------------------------|------------|----------------------------|
| 0 | AATSOZ                    | 0.018677   | 0.018677                   |
| 1 | AATSOare                  | -0.341313  | 0.341313                   |
| 2 | AATSOd                    | -0.123443  | 0.123443                   |
| 3 | AATSOdv                   | -0.265670  | 0.265670                   |
| 4 | AATSOi                    | -0.428929  | 0.428929                   |

  

|     | molecular descriptor name | corr_value | absolute correlation value |
|-----|---------------------------|------------|----------------------------|
| 15  | AATS1i                    | -0.561620  | 0.561620                   |
| 113 | AATSC1c                   | 0.565682   | 0.565682                   |
| 125 | AATSC2c                   | -0.543393  | 0.543393                   |
| 221 | AETA_eta_R                | -0.515778  | 0.515778                   |
| 224 | AMID_C                    | 0.532458   | 0.532458                   |

|     | molecular descriptor name | corr_value | absolute correlation value |
|-----|---------------------------|------------|----------------------------|
| 15  | AATS1i                    | -0.561620  | 0.561620                   |
| 113 | AATSC1c                   | 0.565682   | 0.565682                   |
| 125 | AATSC2c                   | -0.543393  | 0.543393                   |
| 221 | AETA_eta_R                | -0.515778  | 0.515778                   |
| 224 | AMID_C                    | 0.532458   | 0.532458                   |

The model used is: DecisionTree...

Return the coefficient of determination of the prediction:

-0.23724984274096572

R<sup>2</sup> score: 0.9282999207105779

Correlation coefficient: 0.9634832228485236

Test data - unseen during training:

R<sup>2</sup> score: -0.23724984274096572

Correlation coefficient: nan

[7.68211241 6.87506153 5.64717667 6.64290682 6.87506153 7.37986395  
7.37986395 6.04720533 7.37986395 6.87506153 5.64717667 5.64717667  
6.64290682 7.37986395 7.37986395 7.96066227]

0 7.260428  
21 6.398375  
106 5.853872  
68 6.080922  
44 7.638272  
14 7.067526  
108 6.154902  
62 6.455932  
13 7.158641  
9 5.702436  
96 5.136677  
49 5.619789  
54 7.075721  
114 6.026872  
115 5.568636  
87 7.288193

Name: LoVo/DX, dtype: float64

Training Root Mean Square Error: 0.2572044670564493

Testing Root Mean Square Error: 0.8119135627476753

## 2.4 Search inside correlation space

```
[17]: step = 0.01
initial_step = corr_low
last_step = corr_high
first_list = [x / 100.0 for x in range(int(initial_step*100),
    ↪int(last_step*100), int(step*100))]
max_depth = [range(2, 30, 1)]
corr_th = []
second_list = []
```

```

third_list = []
fourth_l = []
fifth_l = []
f_list = []
fif_list = []
for i in first_list:
    for depth in max_depth[0]:

        without_standardization, train_r2, test_r2, _, h_, target_column_name,
        ↪ training_data_RMSE, test_data_RMSE = pred_model.
        ↪ prepare_data_and_create_model(molecular_descriptors_df=data,

        ↪ correlation_threshold=i,

        ↪ standardization=False,

        ↪ model_type='DecisionTreeRegressor',

        ↪ max_depth=depth,

        ↪ target_column_name = target,

        ↪ random_state=random_state,

        ↪ train_test_split_=True,

        ↪ verbose=False)
        corr_th.append(i)
        second_list.append(train_r2)
        third_list.append(test_r2)
        fourth_l.append(training_data_RMSE)
        fifth_l.append(test_data_RMSE)
        f_list.append(len(h_))
        fif_list.append(depth)

```

```

[18]: df_without_standardization = pd.DataFrame(data=corr_th, columns=["Correlation_
        ↪ threshold"])
df_without_standardization['Training data R^2 score'] = second_list
df_without_standardization['Test data R^2 score'] = third_list
df_without_standardization['Training RMSE'] = fourth_l
df_without_standardization['Test RMSE'] = fifth_l
df_without_standardization['Number of features'] = f_list
df_without_standardization['Depth number'] = fif_list

```

```

[19]: df_decision_tree = df_without_standardization.copy()

```

```
#df_without_standardization.to_excel('../Data/
↳A549_Decision_tree_rs_'+str(random_state)+'.xlsx')
```

## 2.5 Plots

```
[20]: corre_list = [x / 100.0 for x in range(int(initial_step*100),
↳int(last_step*100), int(0.01*100))]
for element in corre_list:
    element_ =
    ↳df_without_standardization[df_without_standardization['Correlation_
    ↳threshold'] == float(element)]
    plt.plot(element_['Depth number'], element_['Training data R^2 score'],
    ↳label = "Training data R^2 score", marker='v')
    plt.plot(element_['Depth number'], element_['Test data R^2 score'], label =
    ↳"Test data R^2 score", marker='D')
    plt.legend()
    plt.xlabel('Depth number -> correlation threshold: '+str(element)+'\n
    ↳Number of features: '+str(element_['Number of features'].iloc[0]),
    ↳fontweight='bold')
    plt.xlim(max(element_['Depth number'])+1, min(element_['Depth number'])-1)
    plt.ylabel('R^2 score')
    plt.ylim([0, 1])
    plt.rc('grid', linestyle="-. ", color='black')
    plt.grid(True)
    plt.show()
```

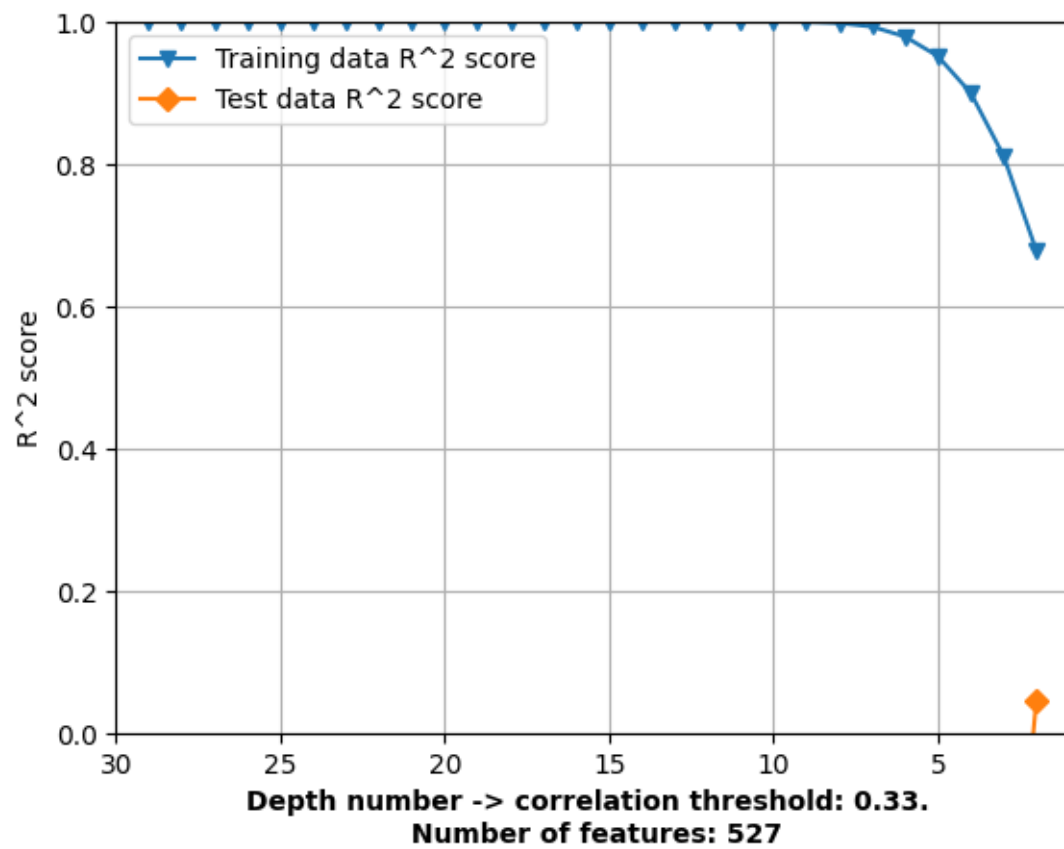



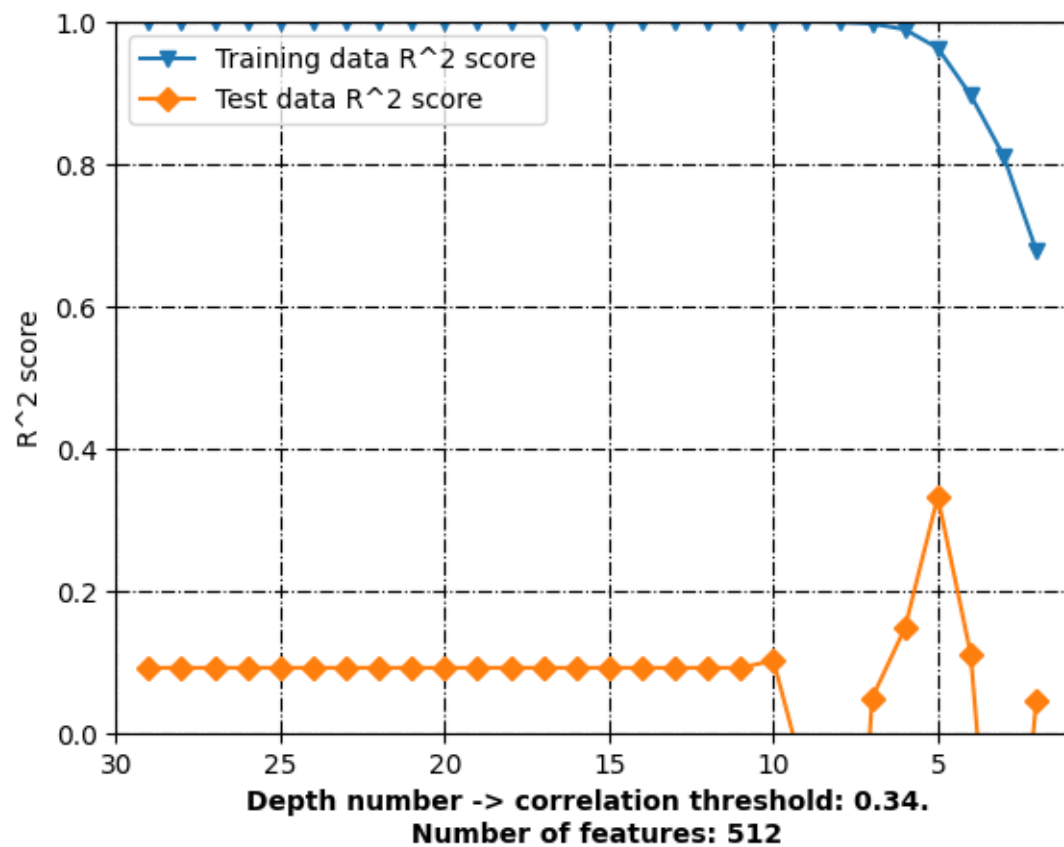

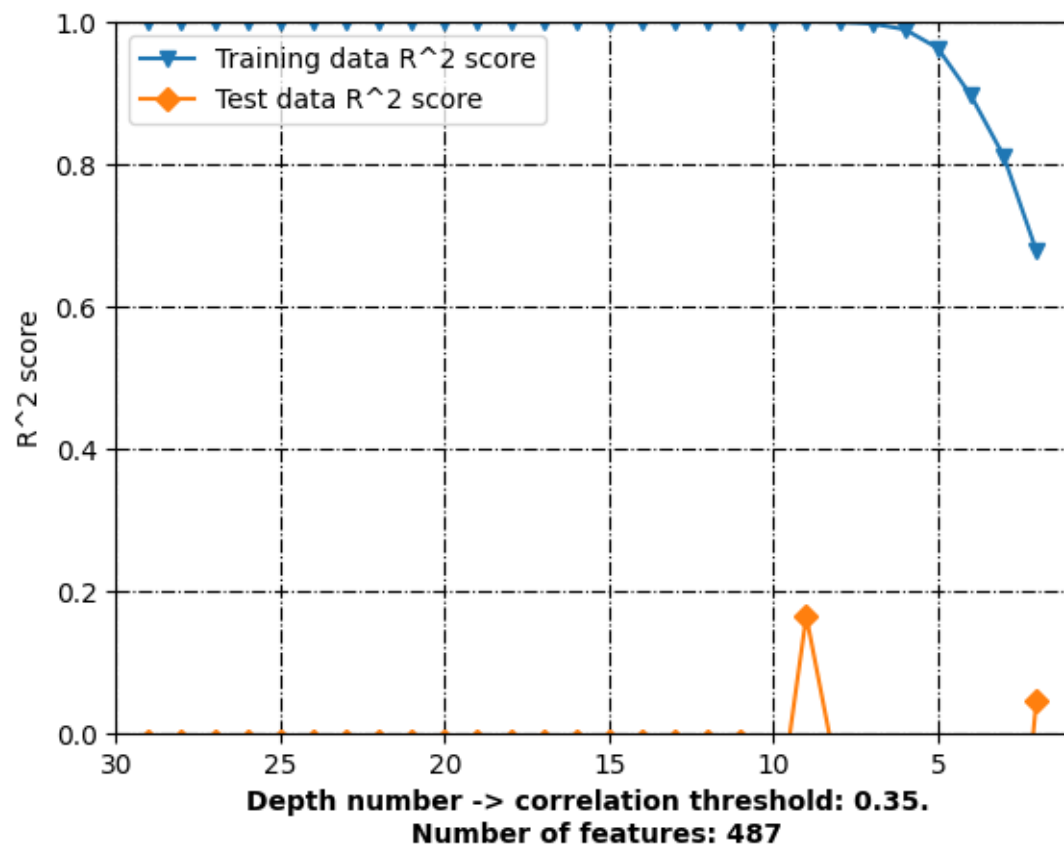

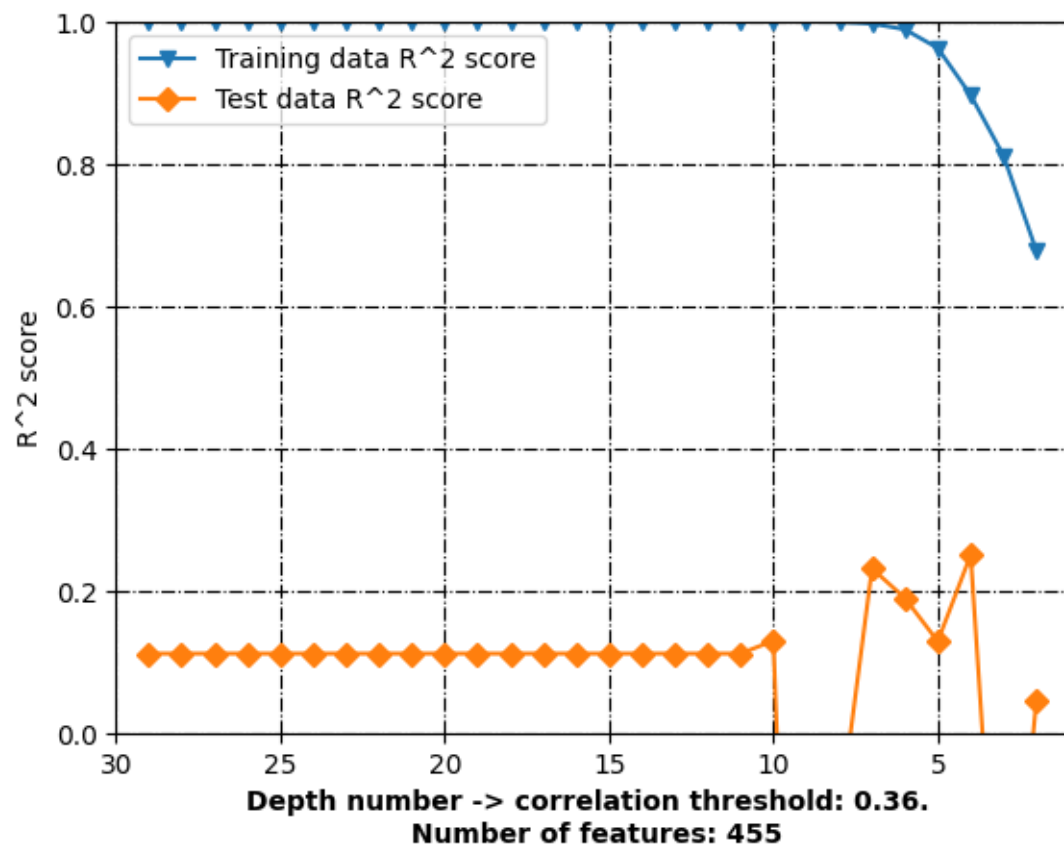

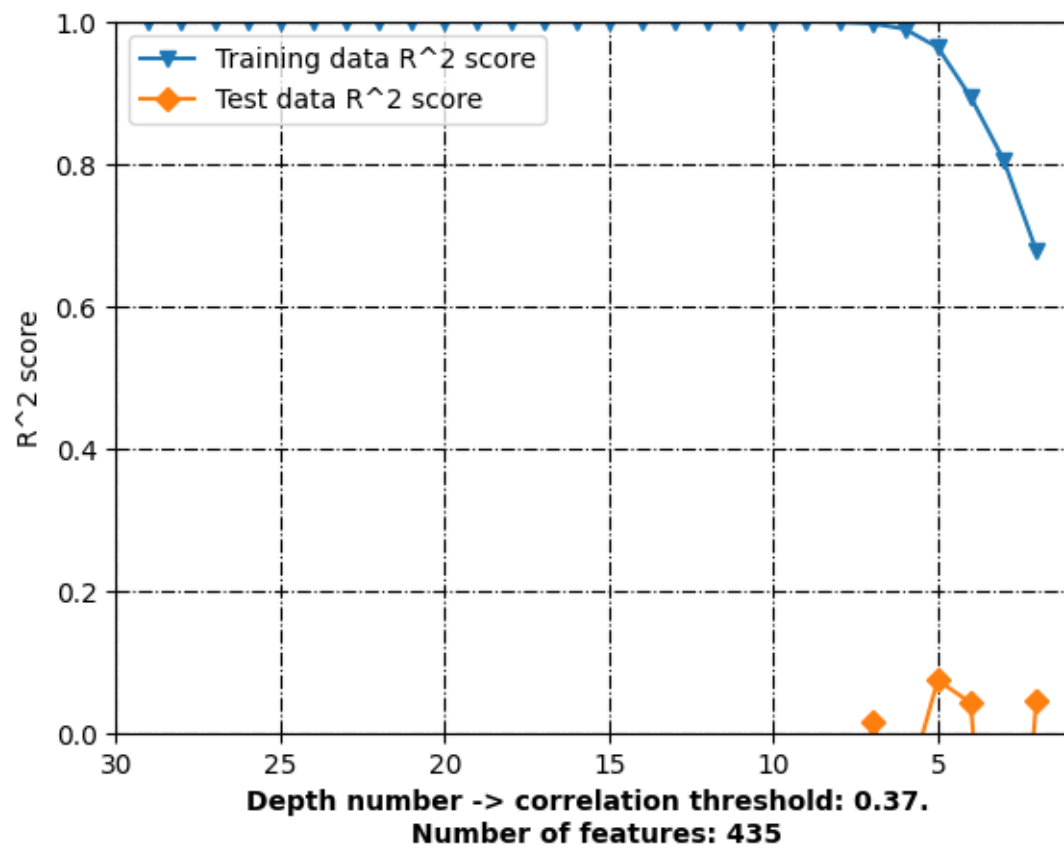

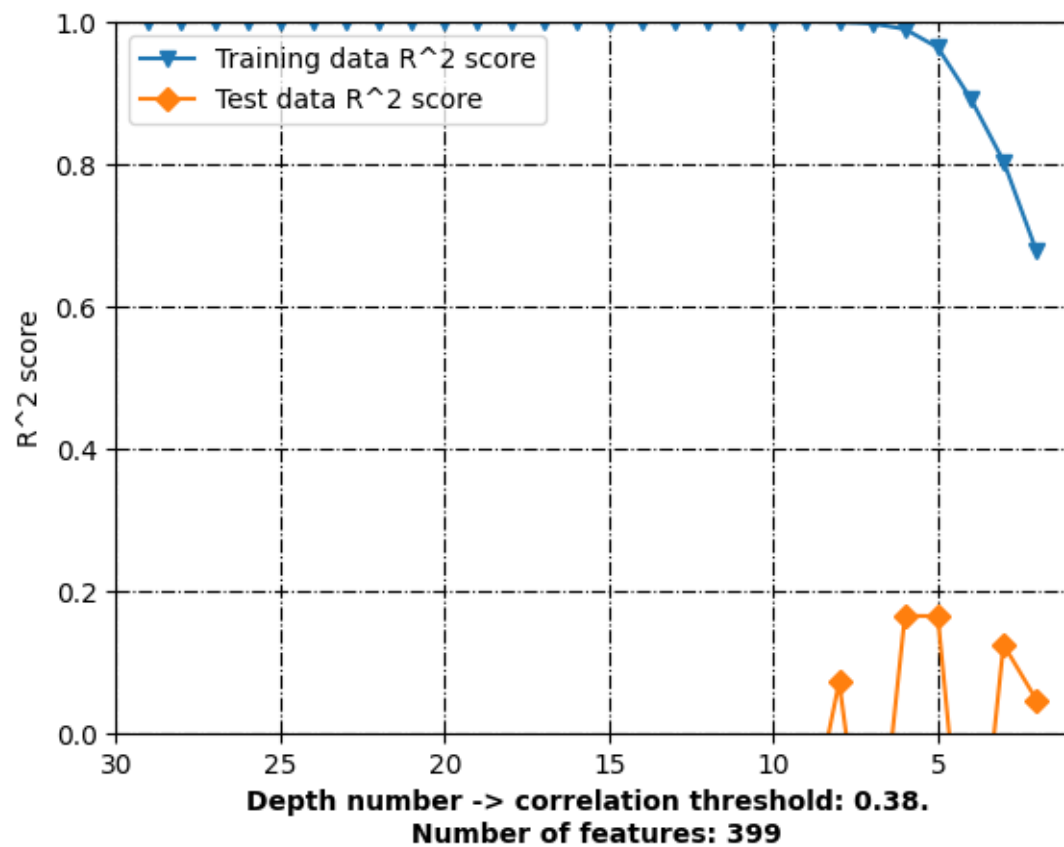

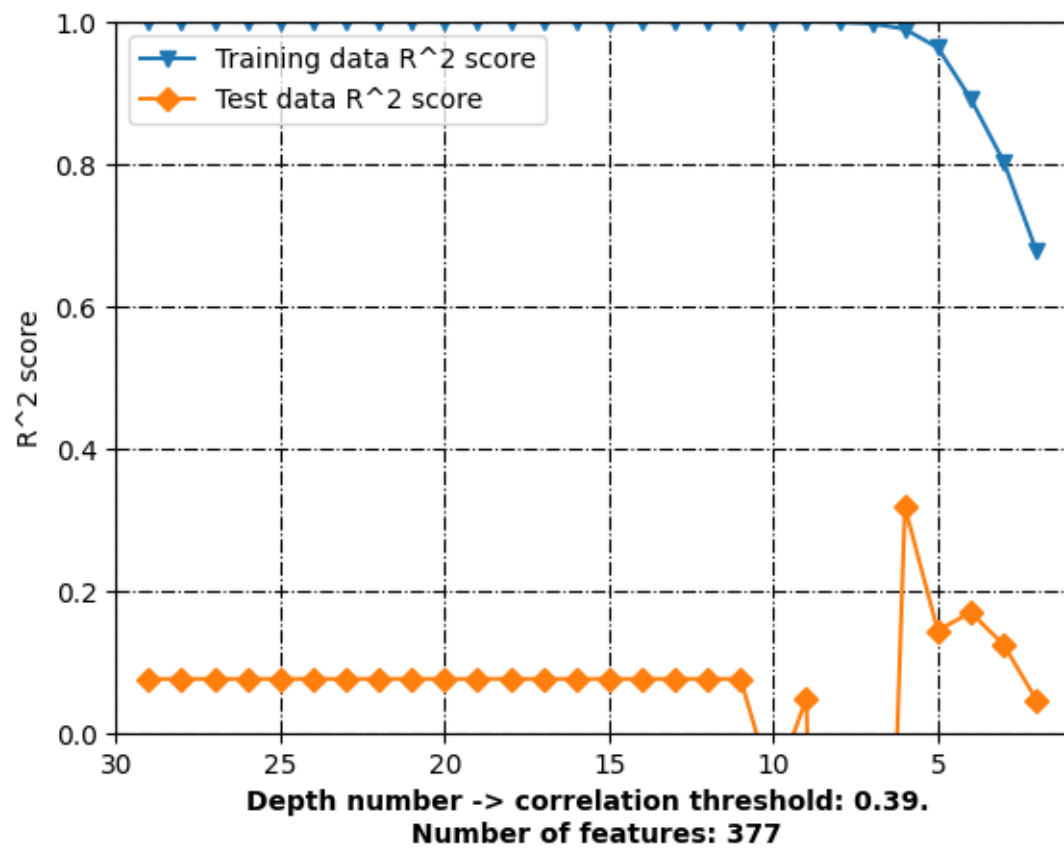

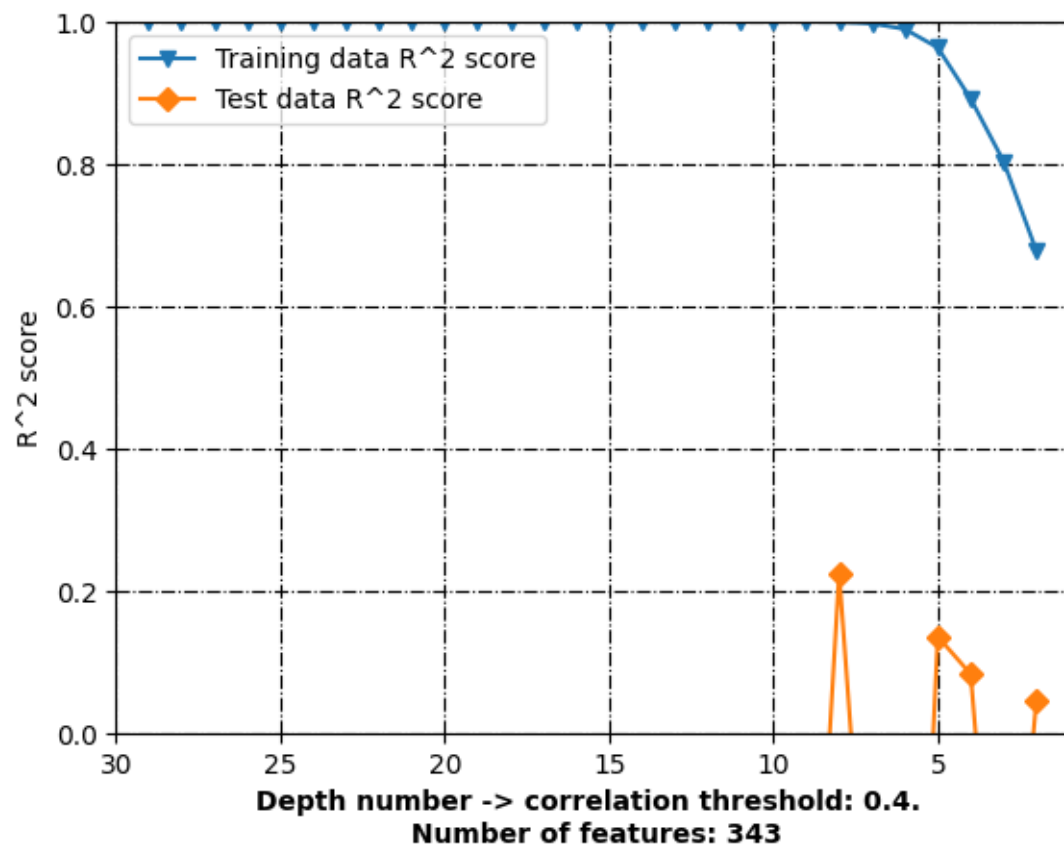

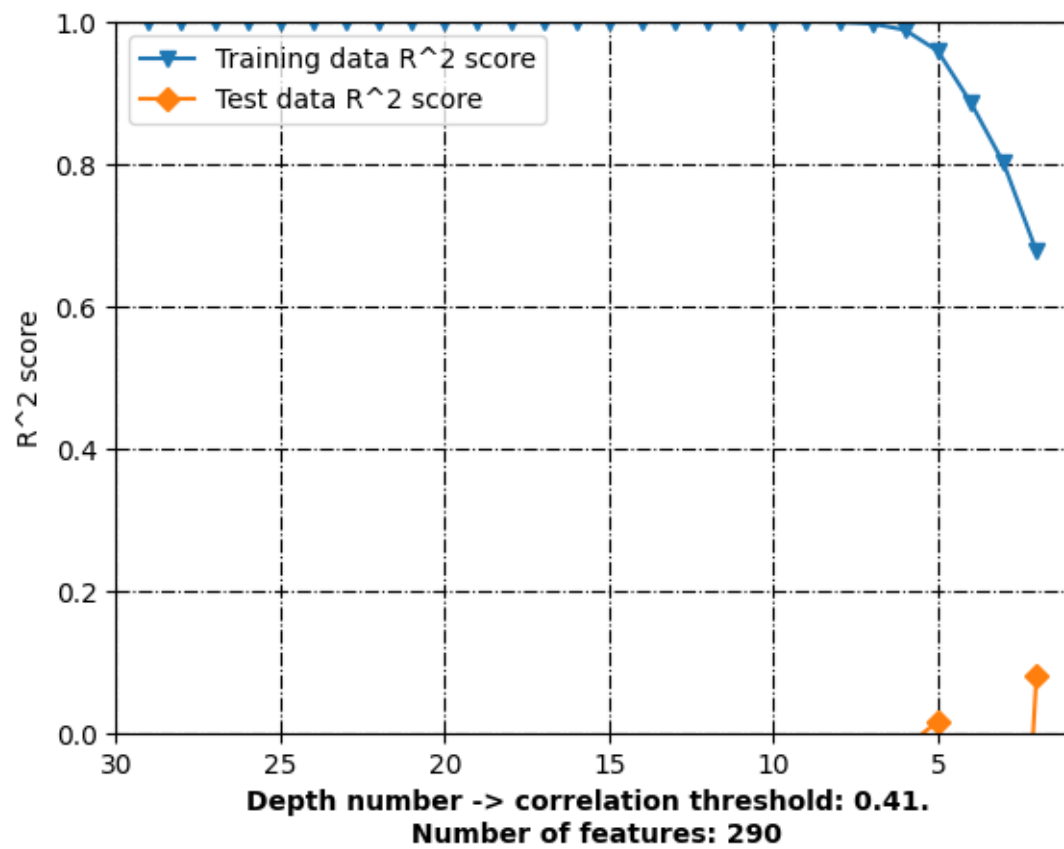



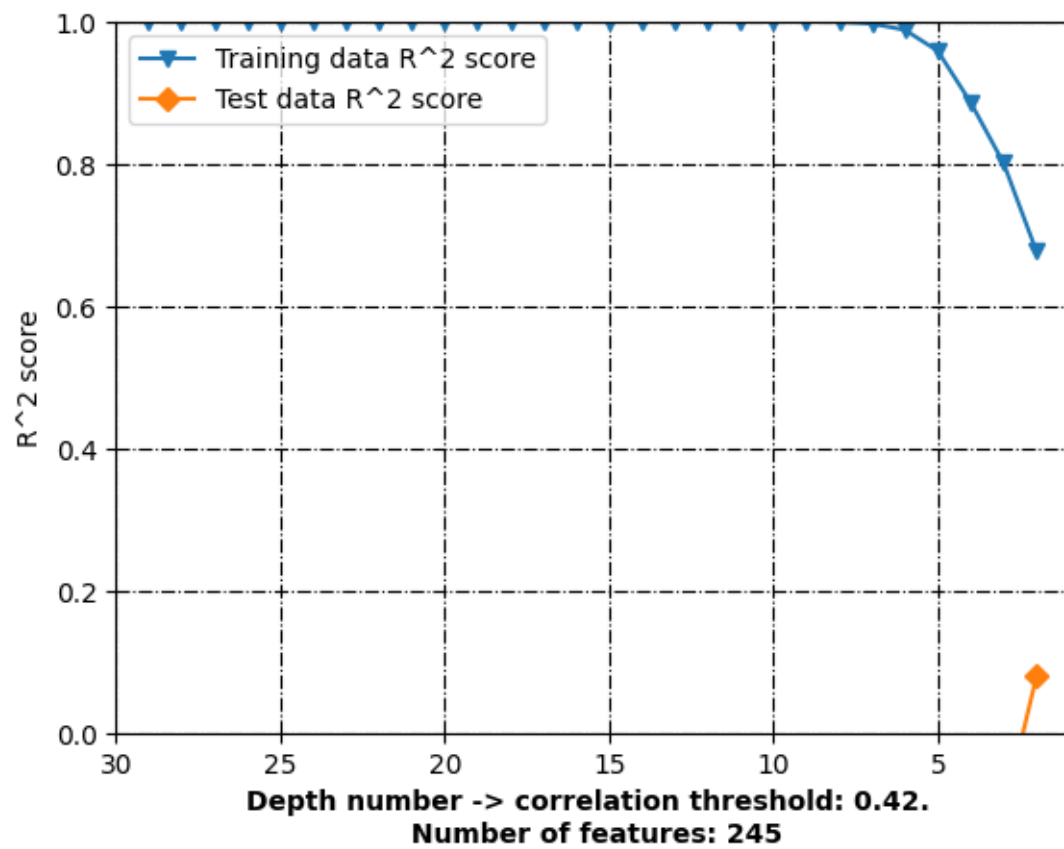

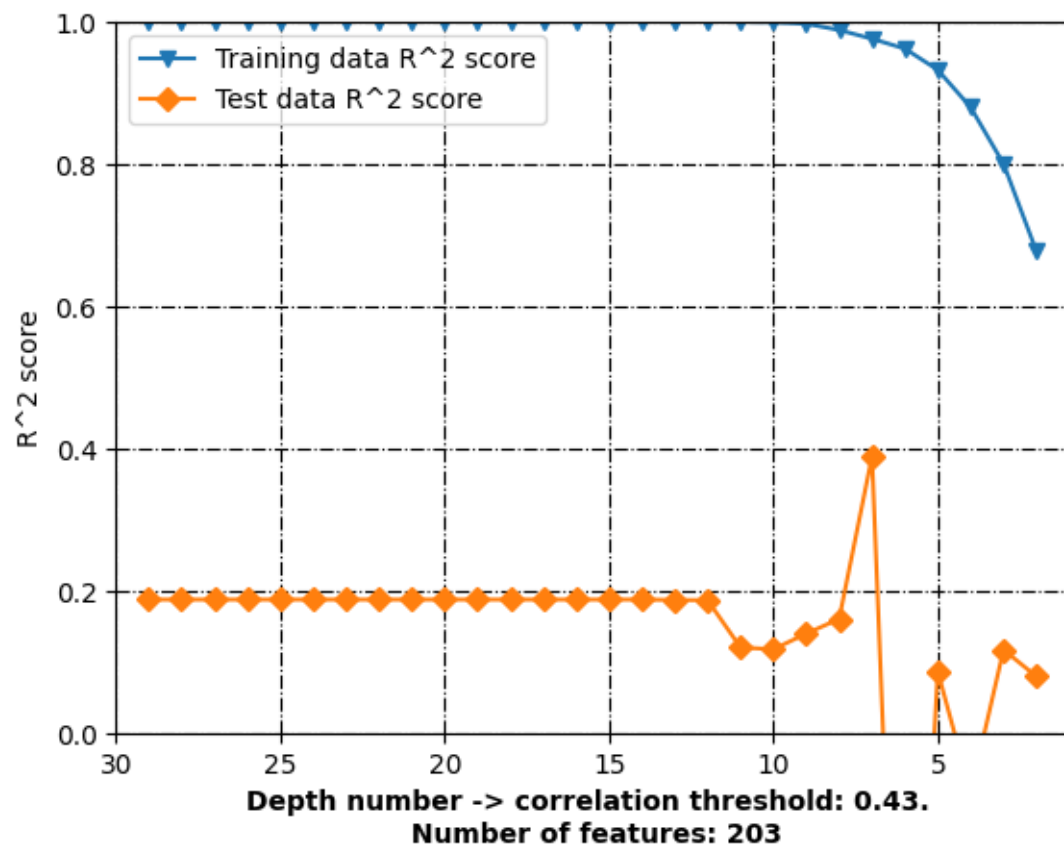

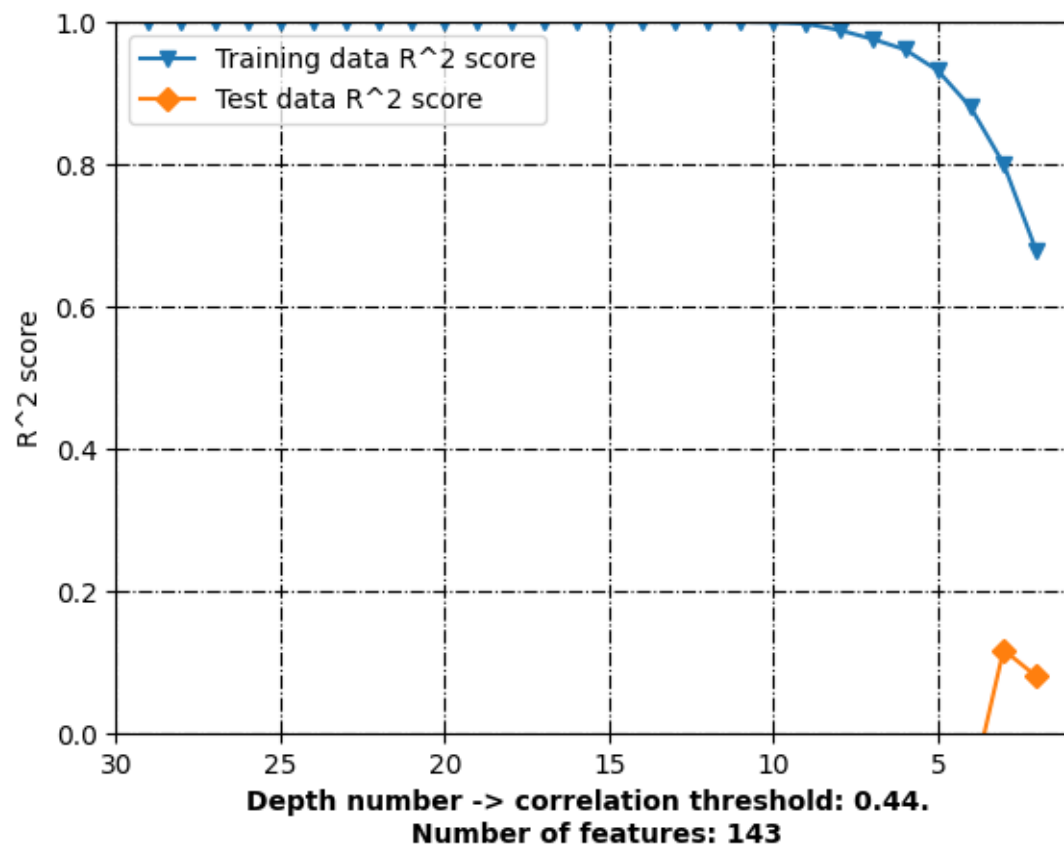

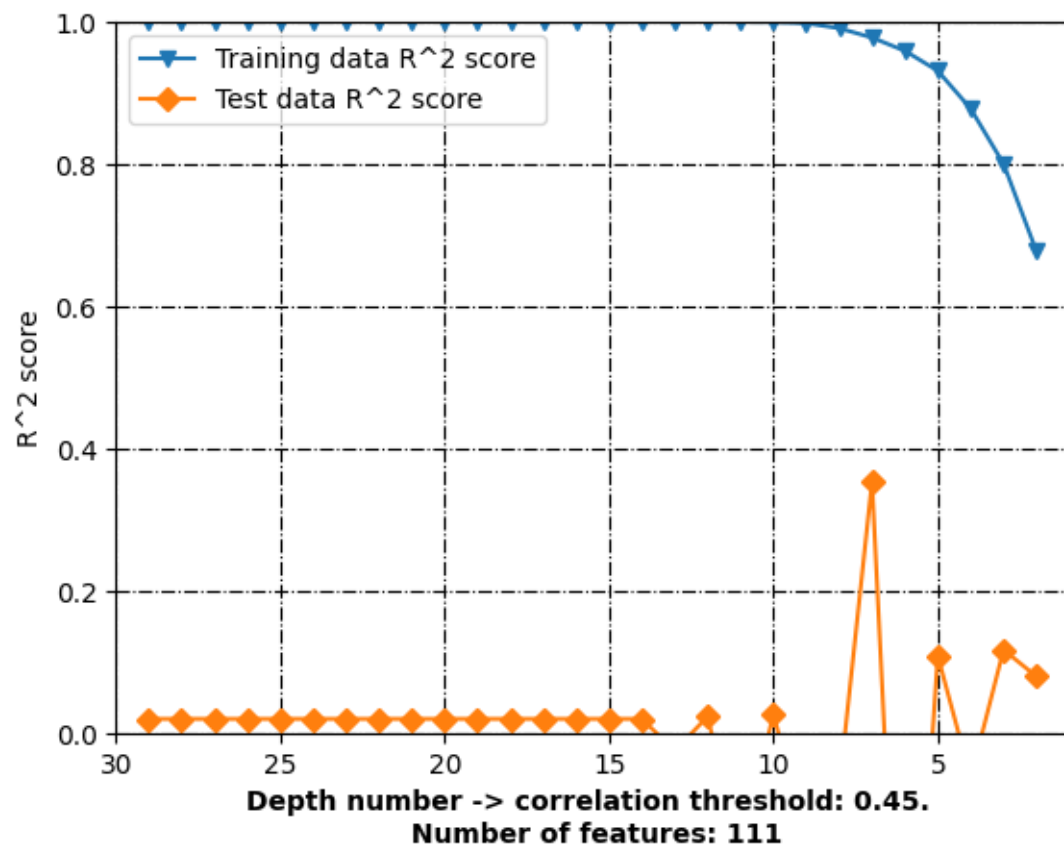

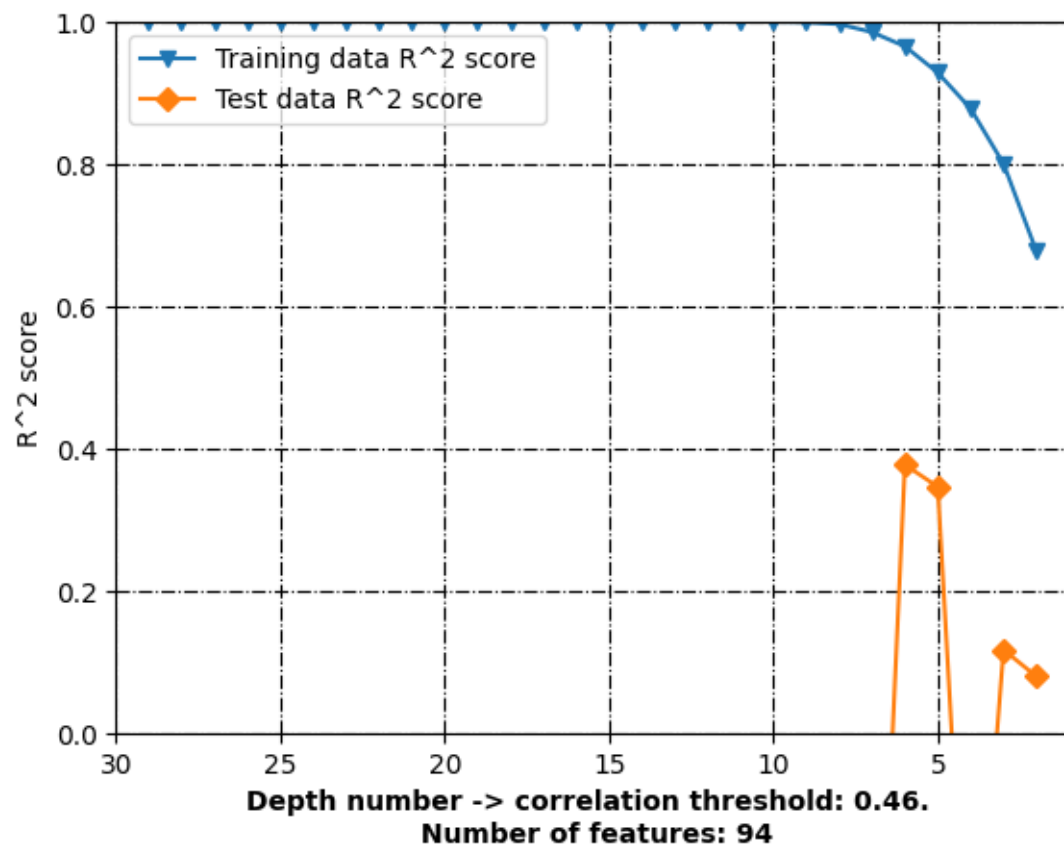

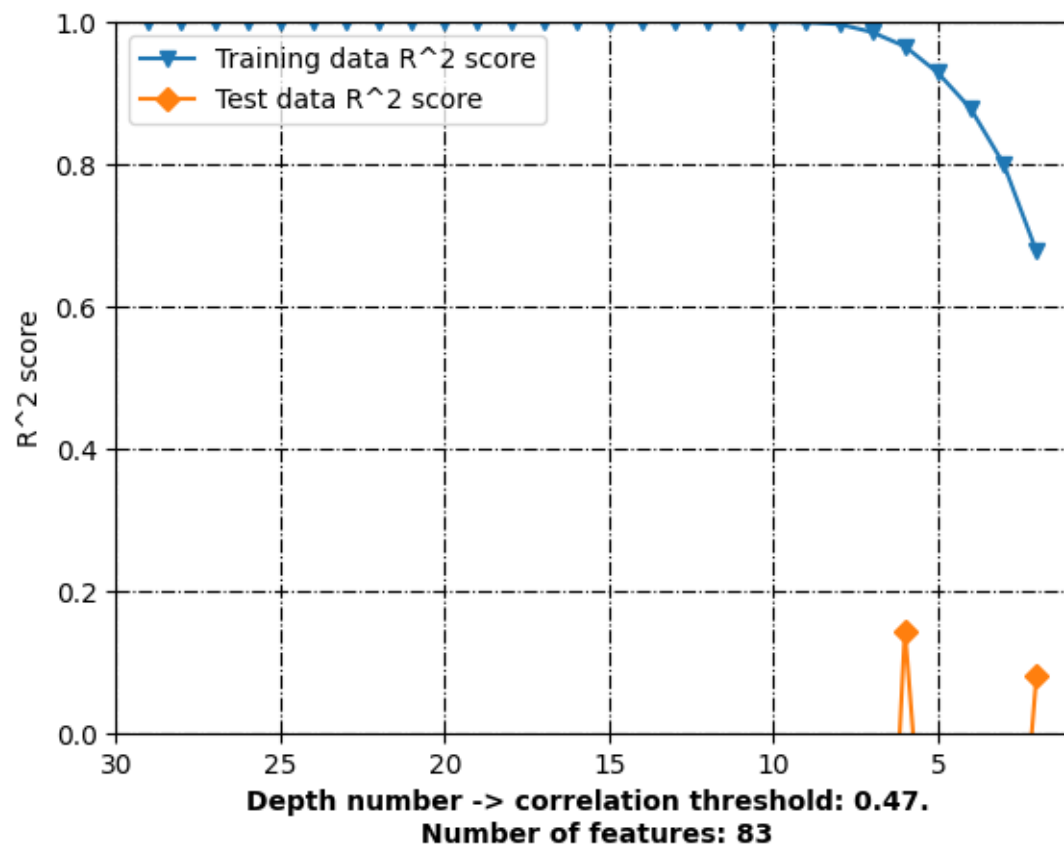

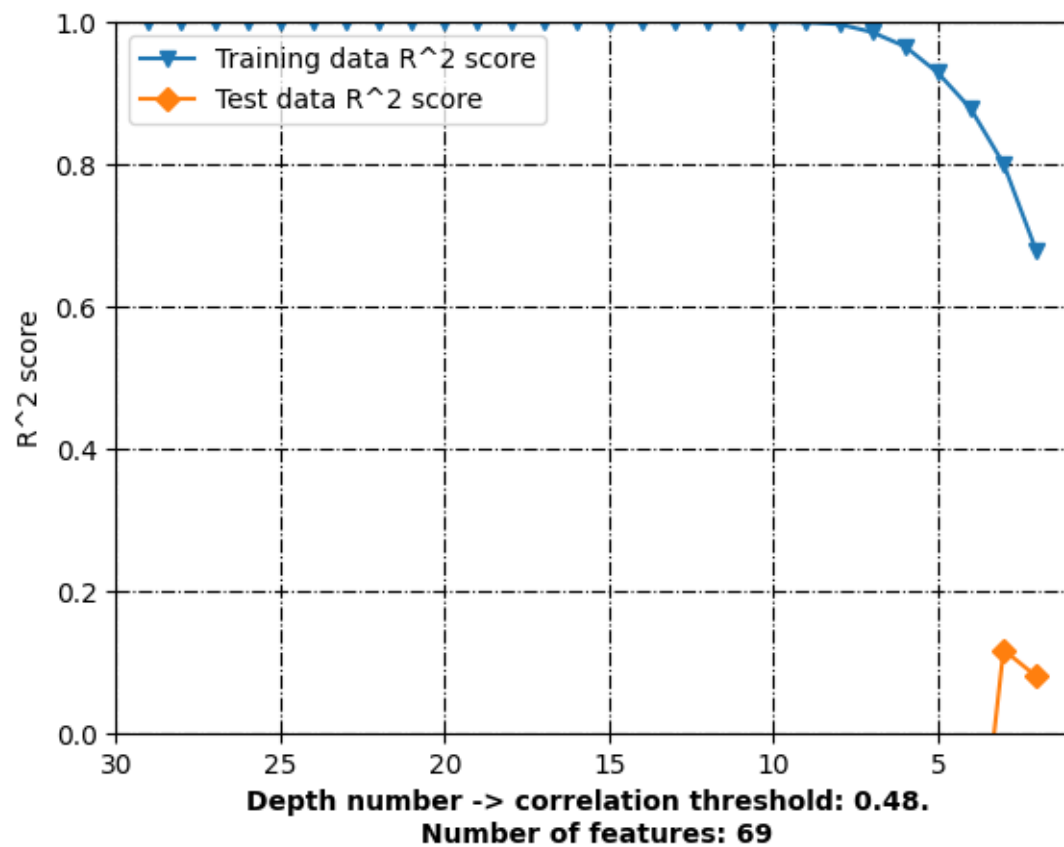

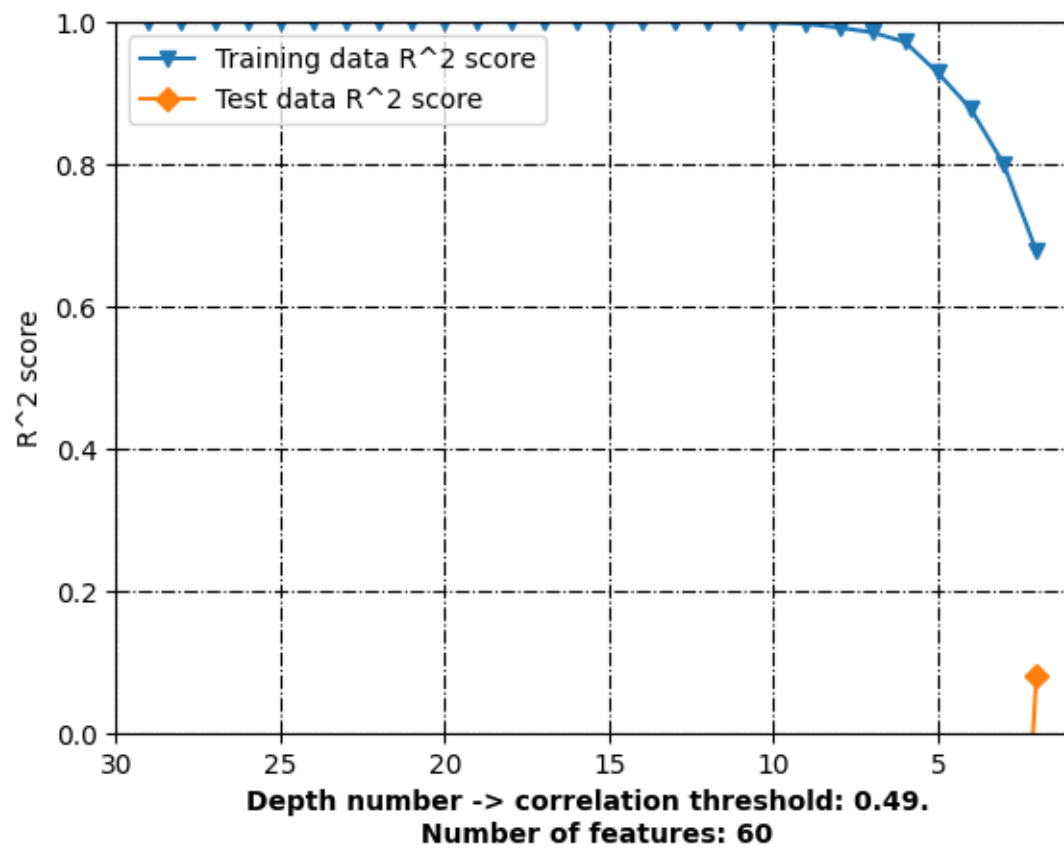



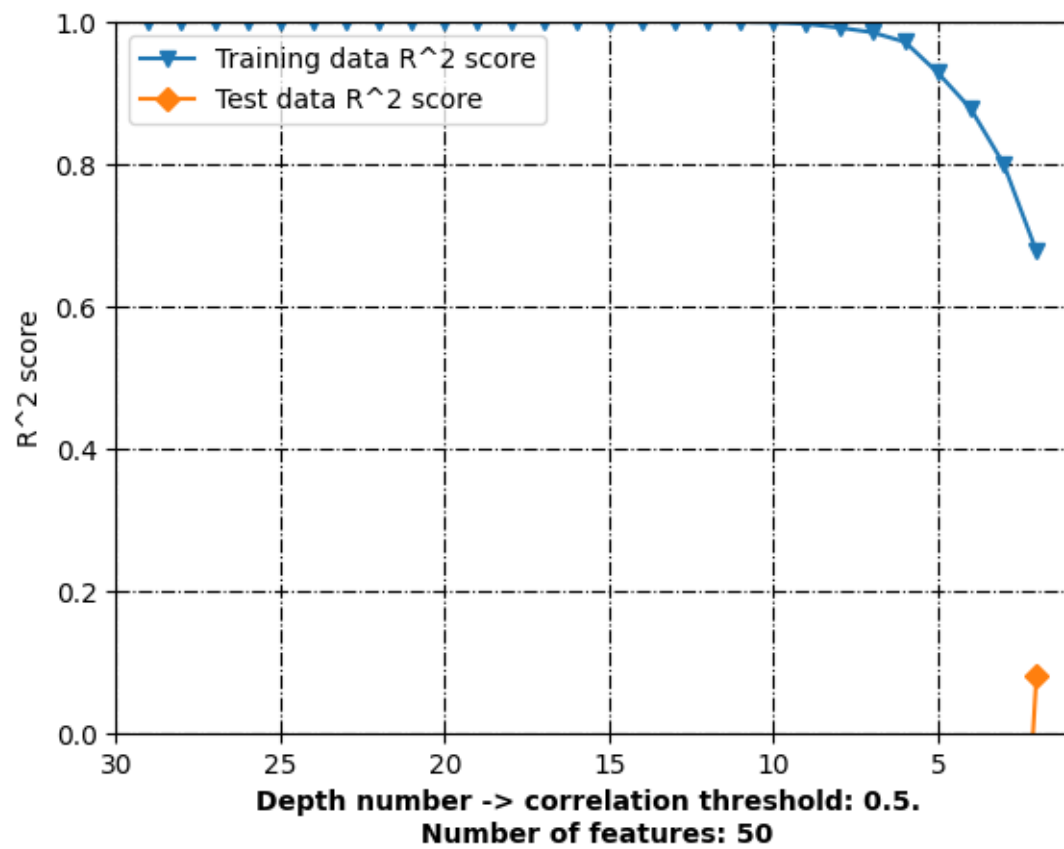

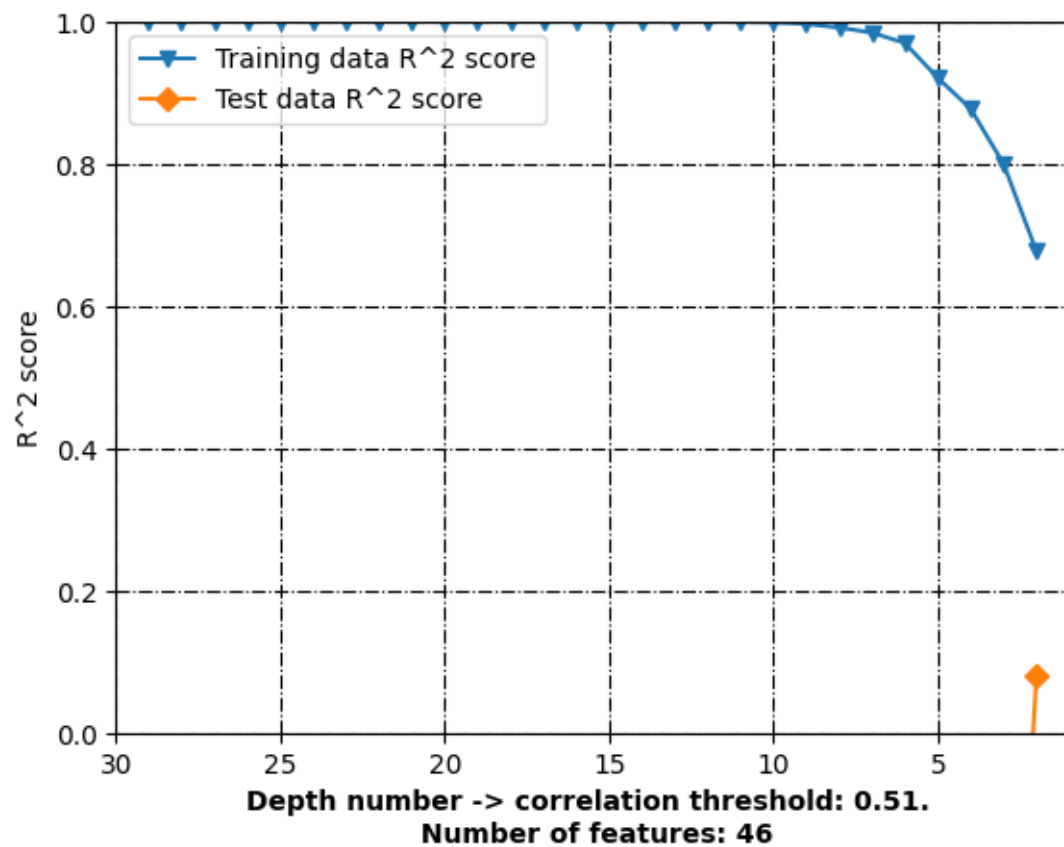

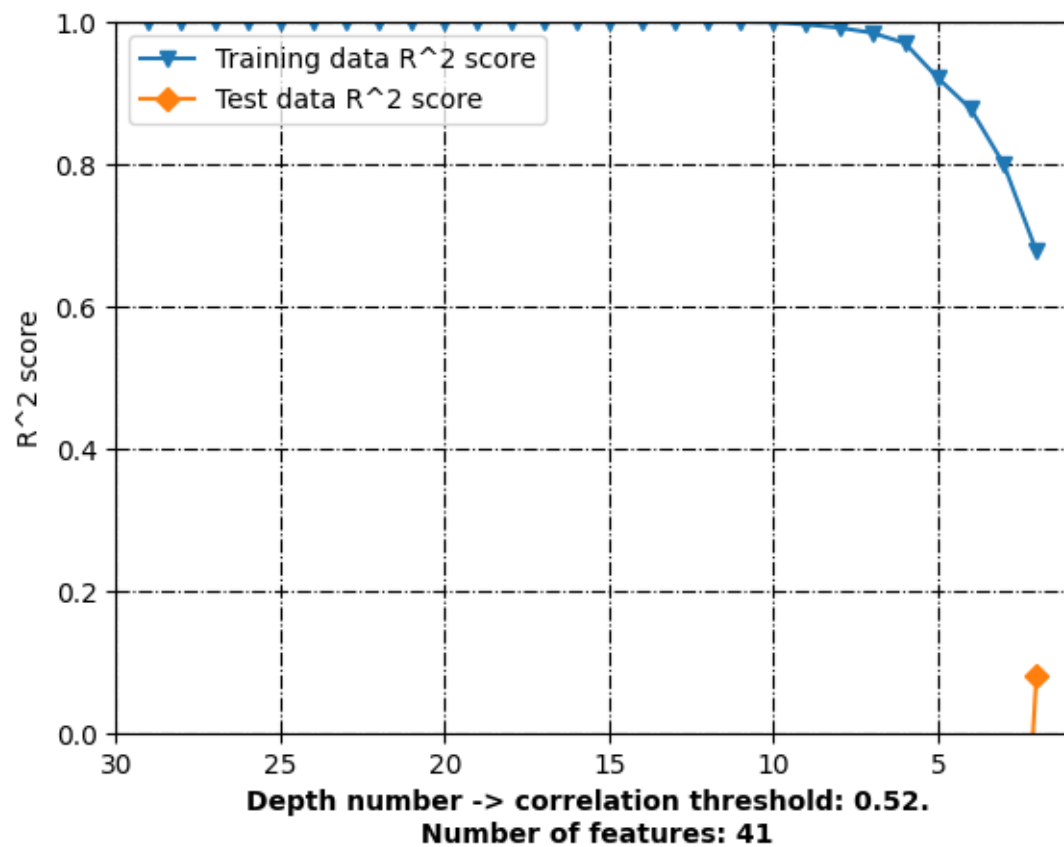

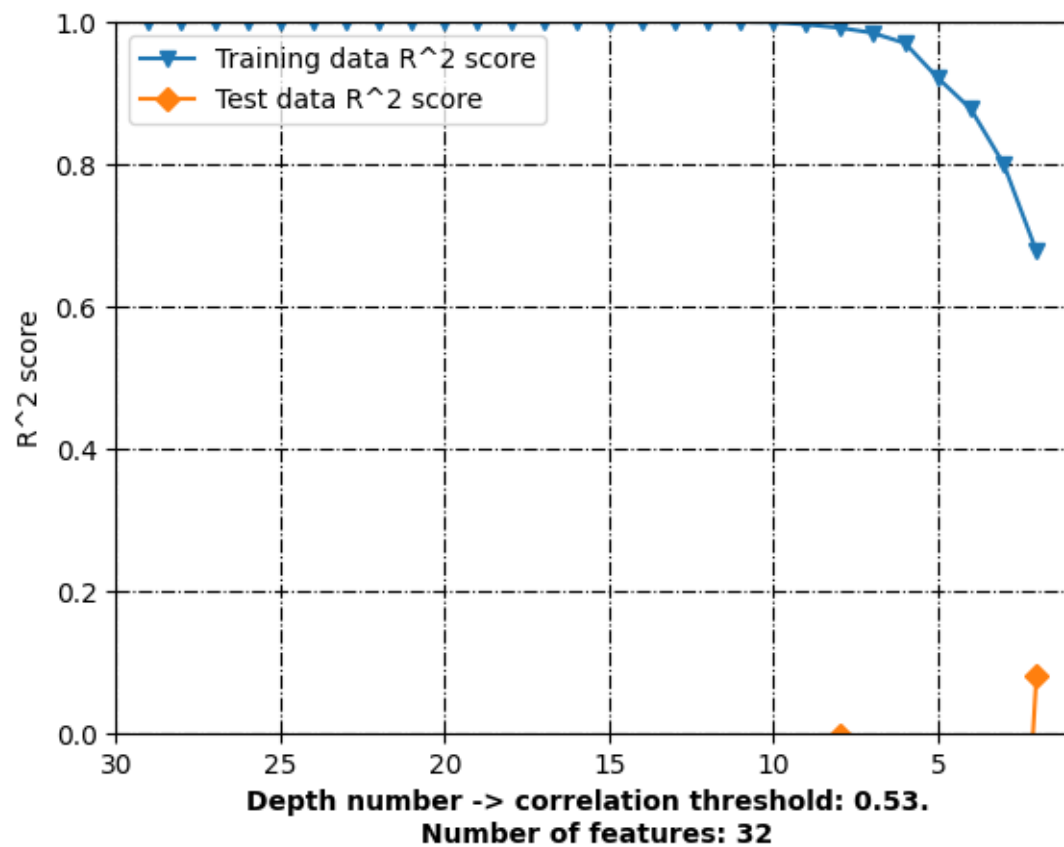

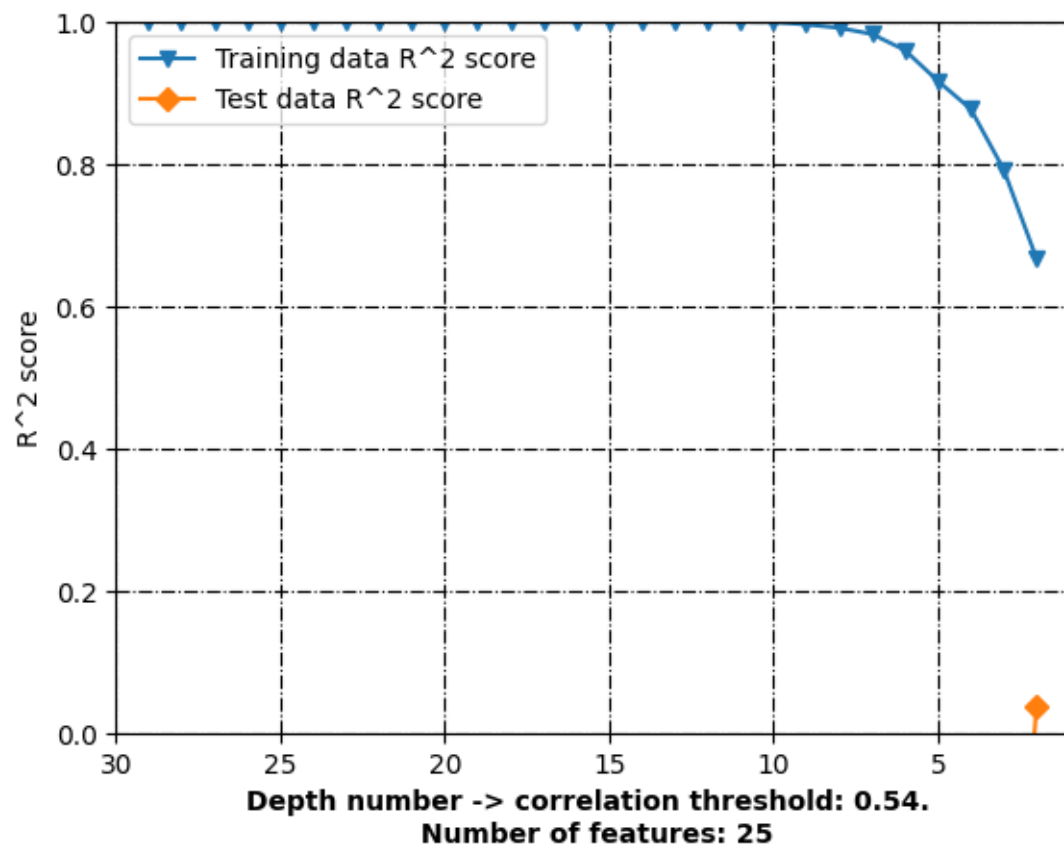

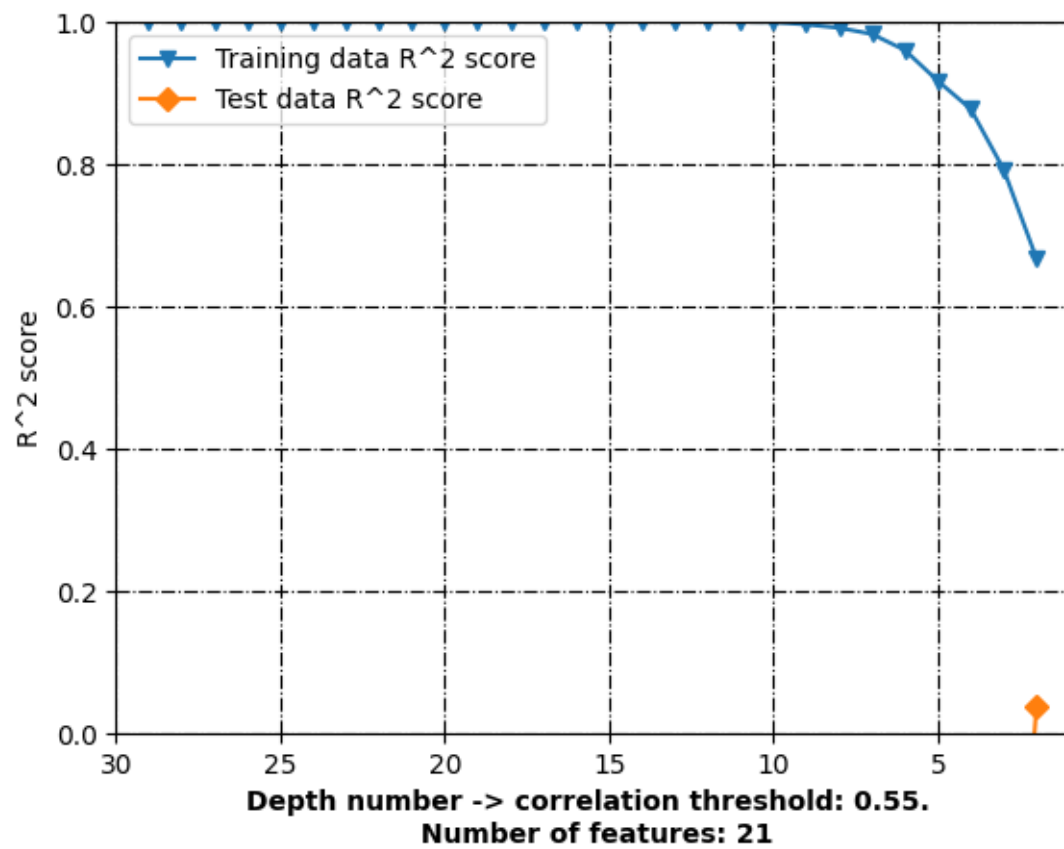

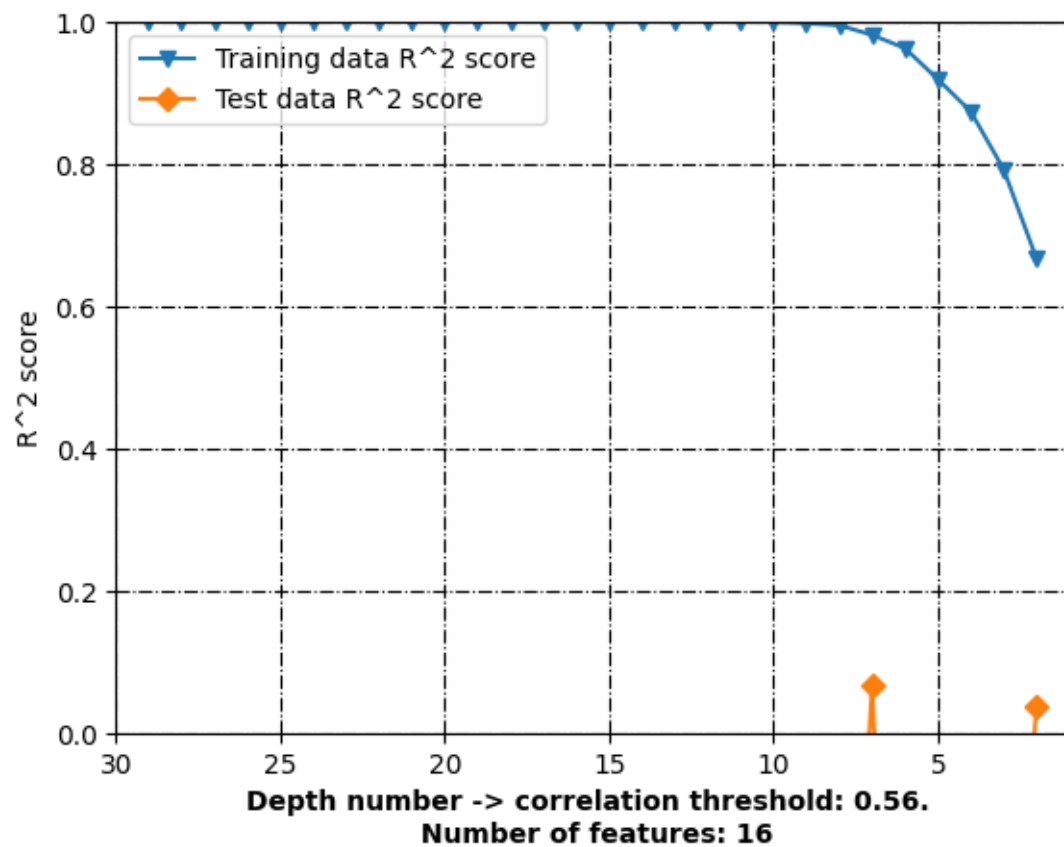

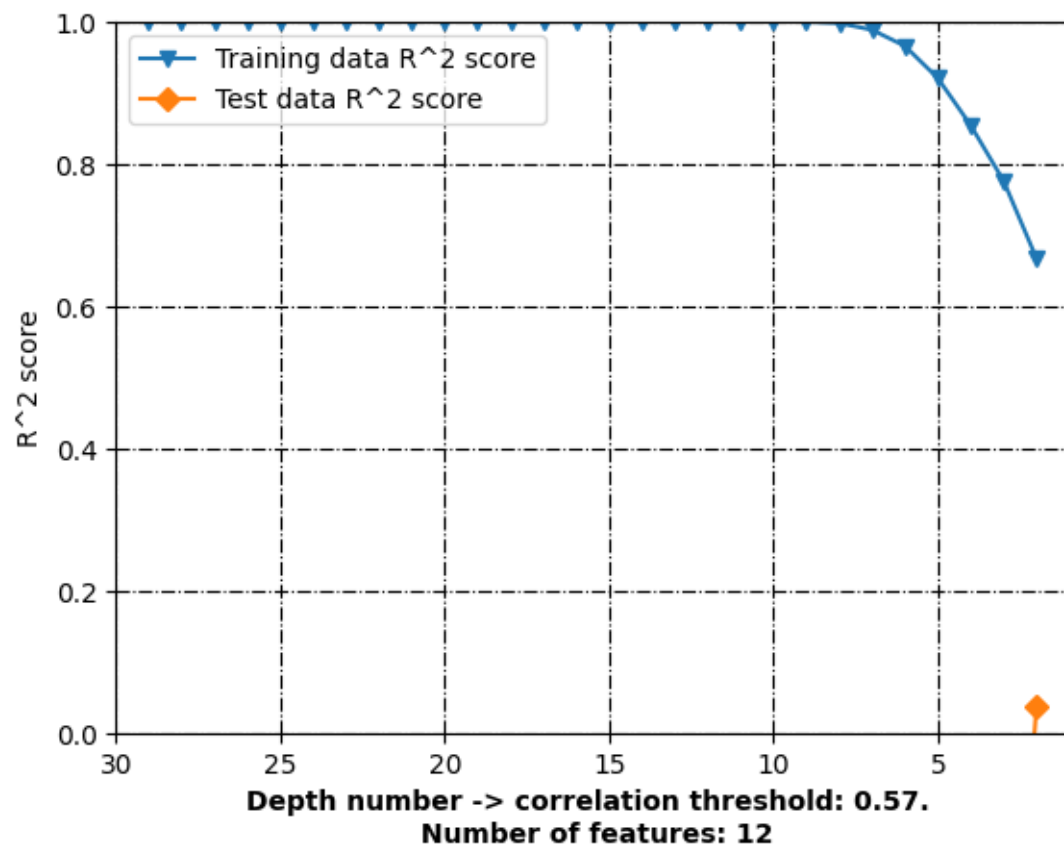



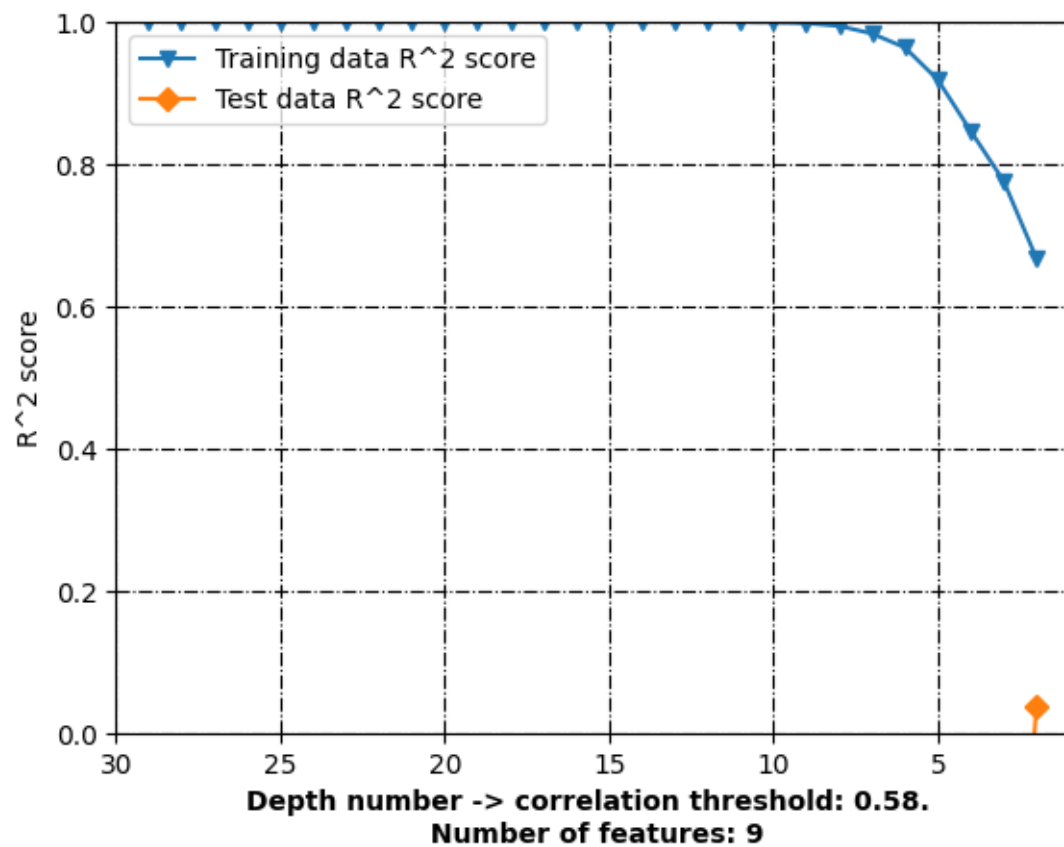

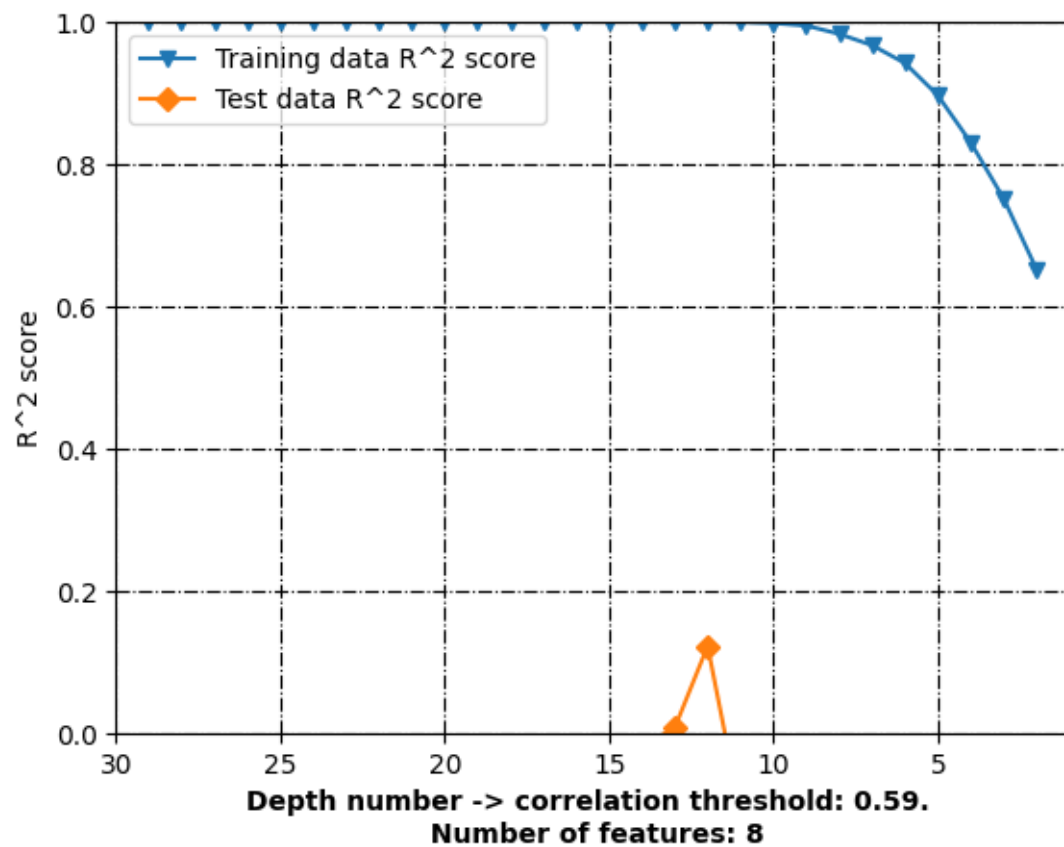

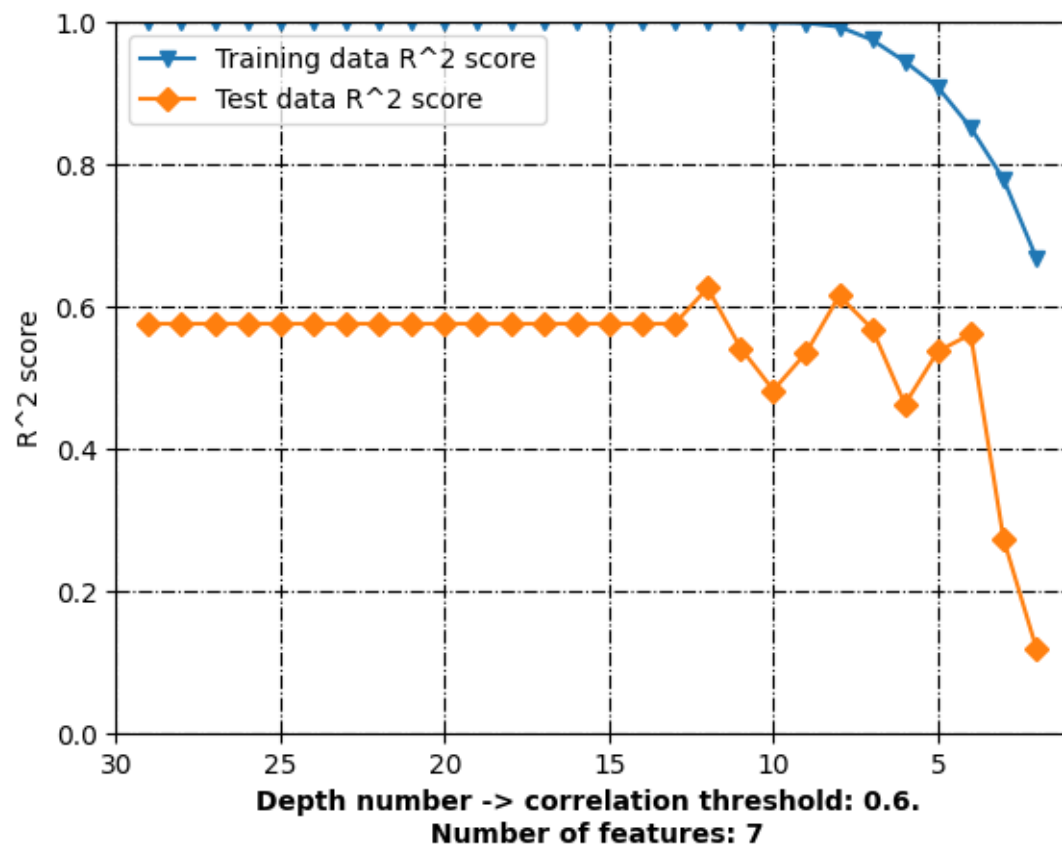

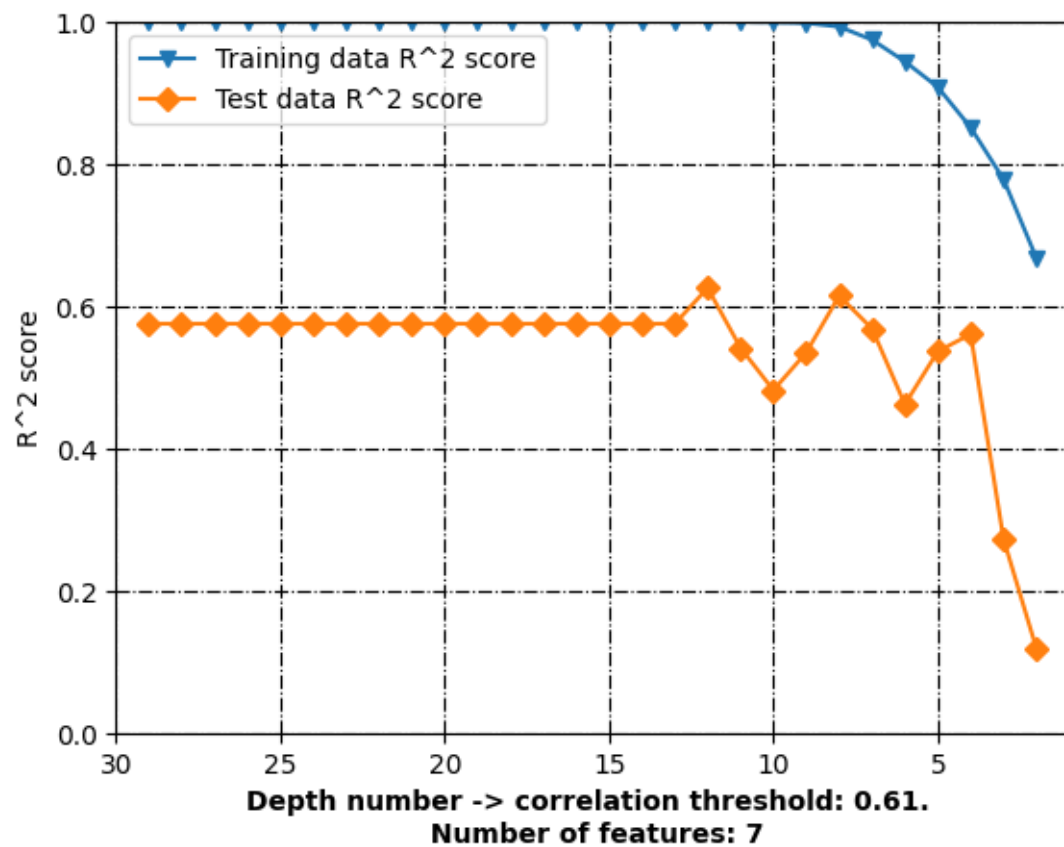

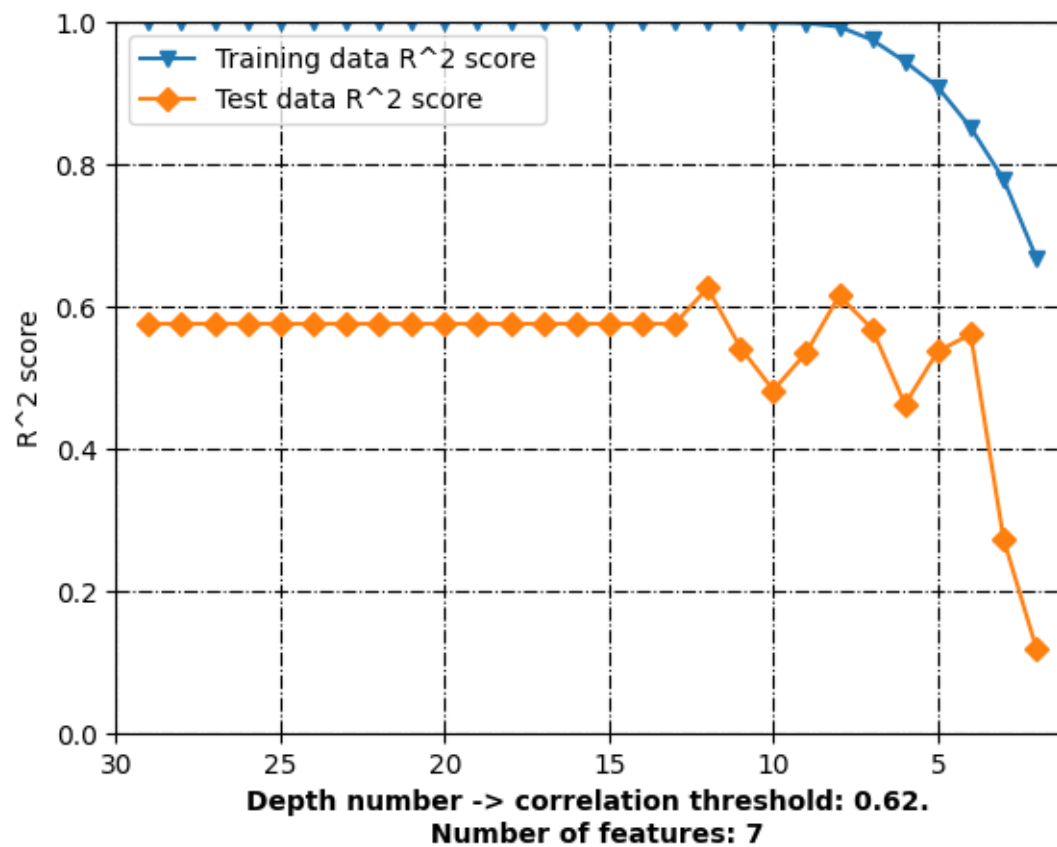

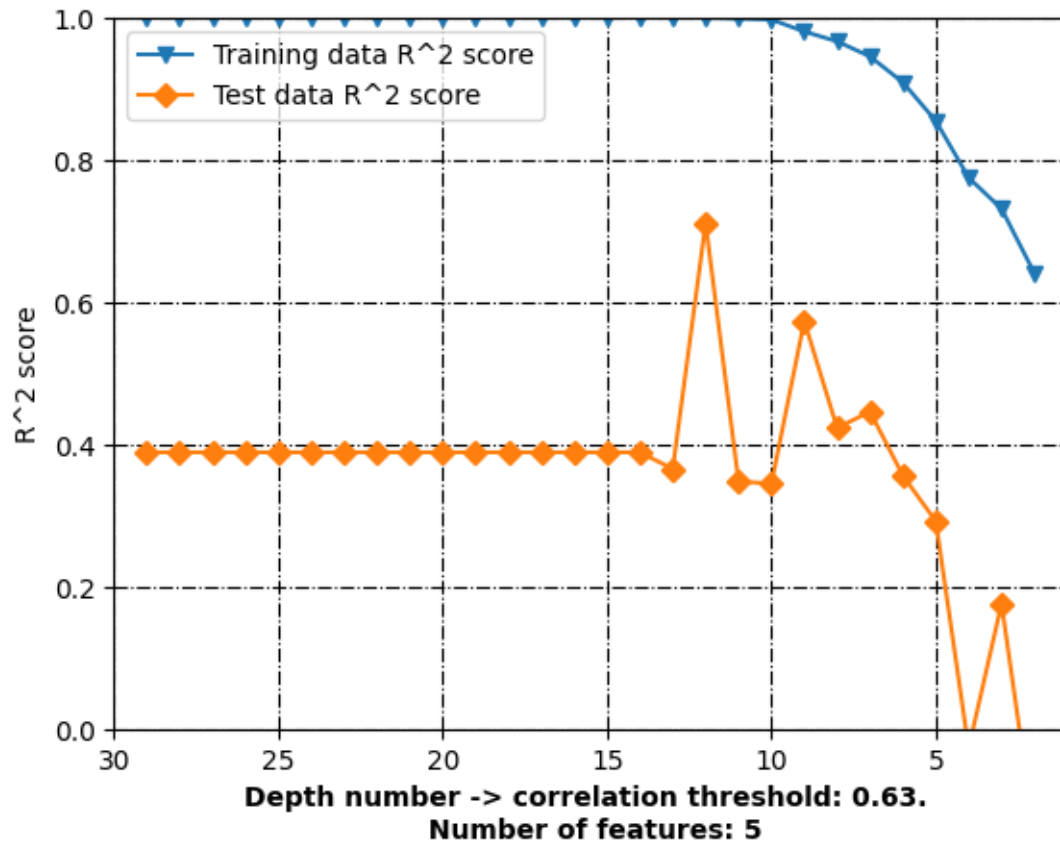

```
[21]: plt.plot(df_without_standardization['Correlation threshold'],  
             df_without_standardization['Number of features'], label = "Number of  
             features", marker='.')  
plt.legend()  
plt.xlabel('Correlation threshold')  
plt.ylabel('Number of features')  
plt.show()
```

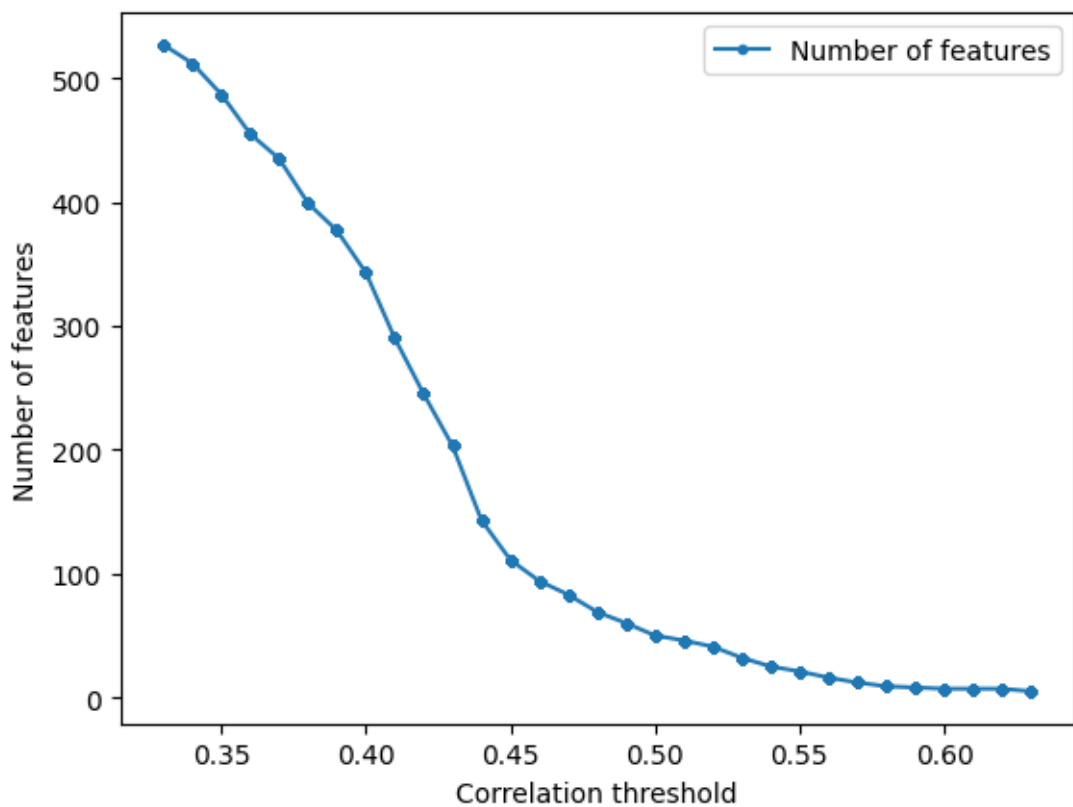

[ ]:

### 3 Random Forest

```
[22]: without_standardization, train_r2_, test_r2_, hist1, hist2, target_column_name,
      ↪ training_data_RMSE, test_data_RMSE = pred_model.
      ↪ prepare_data_and_create_model(molecular_descriptors_df=data,
      ↪
      ↪         correlation_threshold=0.50,
      ↪
      ↪         standardization=False,
      ↪
      ↪         model_type='RandomForestRegressor',
      ↪
      ↪         n_estimators=12,
      ↪
      ↪         target_column_name = target,
      ↪
      ↪         random_state=random_state,
```

```

↪          train_test_split_=True,
↪          verbose=True)

```

I am not doing standardization...

|   | molecular descriptor name |  |
|---|---------------------------|--|
| 0 | AATS0Z                    |  |
| 1 | AATS0are                  |  |
| 2 | AATS0d                    |  |
| 3 | AATS0dv                   |  |
| 4 | AATS0i                    |  |

  

|   | molecular descriptor name | corr_value |
|---|---------------------------|------------|
| 0 | AATS0Z                    | 0.018677   |
| 1 | AATS0are                  | -0.341313  |
| 2 | AATS0d                    | -0.123443  |
| 3 | AATS0dv                   | -0.265670  |
| 4 | AATS0i                    | -0.428929  |

  

|   | molecular descriptor name | corr_value | absolute correlation value |
|---|---------------------------|------------|----------------------------|
| 0 | AATS0Z                    | 0.018677   | 0.018677                   |
| 1 | AATS0are                  | -0.341313  | 0.341313                   |
| 2 | AATS0d                    | -0.123443  | 0.123443                   |
| 3 | AATS0dv                   | -0.265670  | 0.265670                   |
| 4 | AATS0i                    | -0.428929  | 0.428929                   |

  

|     | molecular descriptor name | corr_value | absolute correlation value |
|-----|---------------------------|------------|----------------------------|
| 15  | AATS1i                    | -0.561620  | 0.561620                   |
| 113 | AATSC1c                   | 0.565682   | 0.565682                   |
| 125 | AATSC2c                   | -0.543393  | 0.543393                   |
| 221 | AETA_eta_R                | -0.515778  | 0.515778                   |
| 224 | AMID_C                    | 0.532458   | 0.532458                   |

  

|     | molecular descriptor name | corr_value | absolute correlation value |
|-----|---------------------------|------------|----------------------------|
| 15  | AATS1i                    | -0.561620  | 0.561620                   |
| 113 | AATSC1c                   | 0.565682   | 0.565682                   |
| 125 | AATSC2c                   | -0.543393  | 0.543393                   |
| 221 | AETA_eta_R                | -0.515778  | 0.515778                   |
| 224 | AMID_C                    | 0.532458   | 0.532458                   |

The model used is: RandomForest...

Return the coefficient of determination of the prediction:

0.4229517825255892

R<sup>2</sup> score: 0.9112439993057248

Correlation coefficient: 0.9545910115362101

Test data - unseen during training:

R<sup>2</sup> score: 0.4229517825255892

Correlation coefficient: 0.6503474321665222

[7.55581908 6.76701055 5.75119478 6.49932728 7.04485599 6.98625628  
6.20939289 5.47622337 7.15599556 6.92515496 5.79420297 5.94197432  
6.35947903 6.37983139 6.28160132 7.17954326]

0 7.260428



```

21      6.398375
106     5.853872
68      6.080922
44      7.638272
14      7.067526
108     6.154902
62      6.455932
13      7.158641
9       5.702436
96      5.136677
49      5.619789
54      7.075721
114     6.026872
115     5.568636
87      7.288193

```

Name: LoVo/DX, dtype: float64

Training Root Mean Square Error: 0.2861656827145399

Testing Root Mean Square Error: 0.554481606951121

```

[23]: print(target_column_name+str('_transformed'))
      print(hist1[target_column_name].hist())

```

LoVo/DX\_transformed

AxesSubplot(0.125,0.11;0.775x0.77)

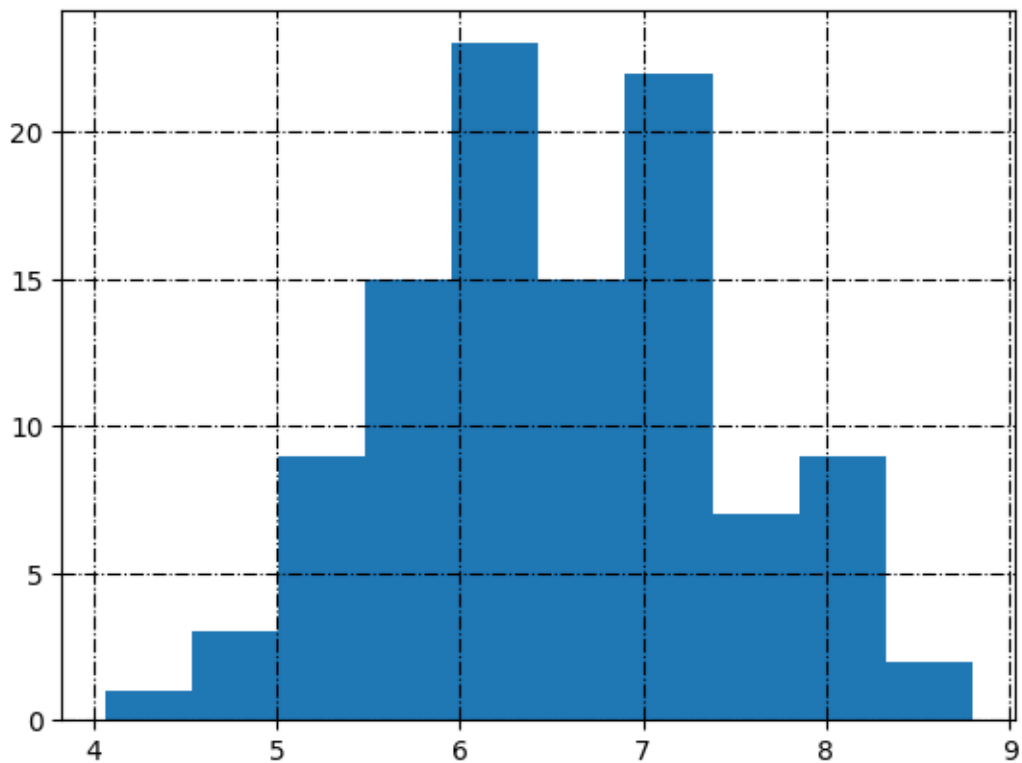

```
[24]: with_standardization, train_r2_, test_r2_, hist1, hist2, target_column_name,
      ↪ training_data_RMSE, test_data_RMSE = pred_model.
      ↪ prepare_data_and_create_model(molecular_descriptors_df=data,
      ↪
      ↪         correlation_threshold=0.50,
      ↪
      ↪         standardization=True,
      ↪
      ↪         model_type='RandomForestRegressor',
      ↪
      ↪         n_estimators=12,
      ↪
      ↪         target_column_name = target,
      ↪
      ↪         random_state=random_state,
      ↪
      ↪         train_test_split=True,
      ↪
      ↪         verbose=True)
```

I am doing standardization...

|   | molecular descriptor name |  |
|---|---------------------------|--|
| 0 | AATS0Z                    |  |
| 1 | AATS0are                  |  |
| 2 | AATS0d                    |  |
| 3 | AATS0dv                   |  |
| 4 | AATS0i                    |  |

  

|   | molecular descriptor name | corr_value |
|---|---------------------------|------------|
| 0 | AATS0Z                    | 0.018677   |
| 1 | AATS0are                  | -0.341313  |
| 2 | AATS0d                    | -0.123443  |
| 3 | AATS0dv                   | -0.265670  |
| 4 | AATS0i                    | -0.428929  |

  

|   | molecular descriptor name | corr_value | absolute correlation value |
|---|---------------------------|------------|----------------------------|
| 0 | AATS0Z                    | 0.018677   | 0.018677                   |
| 1 | AATS0are                  | -0.341313  | 0.341313                   |
| 2 | AATS0d                    | -0.123443  | 0.123443                   |
| 3 | AATS0dv                   | -0.265670  | 0.265670                   |
| 4 | AATS0i                    | -0.428929  | 0.428929                   |

  

|     | molecular descriptor name | corr_value | absolute correlation value |
|-----|---------------------------|------------|----------------------------|
| 15  | AATS1i                    | -0.561620  | 0.561620                   |
| 113 | AATSC1c                   | 0.565682   | 0.565682                   |
| 125 | AATSC2c                   | -0.543393  | 0.543393                   |
| 221 | AETA_eta_R                | -0.515778  | 0.515778                   |
| 224 | AMID_C                    | 0.532458   | 0.532458                   |

|     | molecular descriptor name | corr_value | absolute correlation value |
|-----|---------------------------|------------|----------------------------|
| 15  | AATS1i                    | -0.561620  | 0.561620                   |
| 113 | AATSC1c                   | 0.565682   | 0.565682                   |
| 125 | AATSC2c                   | -0.543393  | 0.543393                   |
| 221 | AETA_eta_R                | -0.515778  | 0.515778                   |
| 224 | AMID_C                    | 0.532458   | 0.532458                   |

The model used is: RandomForest...

Return the coefficient of determination of the prediction:

0.4229517825255892

R<sup>2</sup> score: 0.9112439993057248

Correlation coefficient: 0.9545910115362101

Test data - unseen during training:

R<sup>2</sup> score: 0.4229517825255892

Correlation coefficient: 0.6503474321665222

[7.55581908 6.76701055 5.75119478 6.49932728 7.04485599 6.98625628

6.20939289 5.47622337 7.15599556 6.92515496 5.79420297 5.94197432

6.35947903 6.37983139 6.28160132 7.17954326]

0 7.260428

21 6.398375

106 5.853872

68 6.080922

44 7.638272

14 7.067526

108 6.154902

62 6.455932

13 7.158641

9 5.702436

96 5.136677

49 5.619789

54 7.075721

114 6.026872

115 5.568636

87 7.288193

Name: LoVo/DX, dtype: float64

Training Root Mean Square Error: 0.2861656827145399

Testing Root Mean Square Error: 0.554481606951121

### 3.1 Search inside correlation space

```
[25]: step = 0.01
initial_step = corr_low
last_step = corr_high
first_list = [x / 100.0 for x in range(int(initial_step*100),
    ↪int(last_step*100), int(step*100))]
n_estimators = [range(2,21,1)]
corr_th = []
second_list = []
```

```

third_list = []
fourth_l = []
fifth_l = []
f_list = []
fif_list = []
for i in first_list:

    for estimator in n_estimators[0]:

        without_standardization, train_r2, test_r2, _, h_, target_column_name,
        ↪ training_data_RMSE, test_data_RMSE = pred_model.
        ↪ prepare_data_and_create_model(molecular_descriptors_df=data,

        ↪ correlation_threshold=i,

        ↪ standardization=False,

        ↪ model_type='RandomForestRegressor',

        ↪ n_estimators_=estimator,

        ↪ target_column_name = target,

        ↪ random_state=random_state,

        ↪ train_test_split_=True,

        ↪ verbose=False)
        corr_th.append(i)
        second_list.append(train_r2)
        third_list.append(test_r2)
        fourth_l.append(training_data_RMSE)
        fifth_l.append(test_data_RMSE)
        f_list.append(len(h_))
        fif_list.append(estimator)

```

```

[26]: df_without_standardization = pd.DataFrame(data=corr_th, columns=["Correlation_
        ↪ threshold"])
df_without_standardization['Training data R^2 score'] = second_list
df_without_standardization['Test data R^2 score'] = third_list
df_without_standardization['Training RMSE'] = fourth_l
df_without_standardization['Test RMSE'] = fifth_l
df_without_standardization['Number of features'] = f_list
df_without_standardization['Number of estimators'] = fif_list

```

```

[27]: df_random_forest = df_without_standardization.copy()
      #df_without_standardization.to_excel('../Data/
      ↪A549_Random_forest_rs_'+str(random_state)+'.xlsx')

[28]: corre_list = [x / 100.0 for x in range(int(initial_step*100),
      ↪int(last_step*100), int(0.01*100))]
      for element in corre_list:
          element_ =
          ↪df_without_standardization[df_without_standardization['Correlation_
          ↪threshold'] == float(element)]
          plt.plot(element_['Number of estimators'], element_['Training data R^2_
          ↪score'], label = "Training data R^2 score", marker='v')
          plt.plot(element_['Number of estimators'], element_['Test data R^2 score'],
          ↪label = "Test data R^2 score", marker='D')
          plt.legend()
          plt.xlabel('Number of estimators -> correlation threshold: '+str(element)+'.'
          ↪\n Number of features: '+str(element_['Number of features'].iloc[0]))
          plt.xlim(max(element_['Number of estimators'])+1, min(element_['Number of_
          ↪estimators'])-1)
          plt.ylabel('R^2 score')
          plt.ylim([0, 1])
          plt.rc('grid', linestyle="-. ", color='black')
          plt.grid(True)
          plt.show()

```

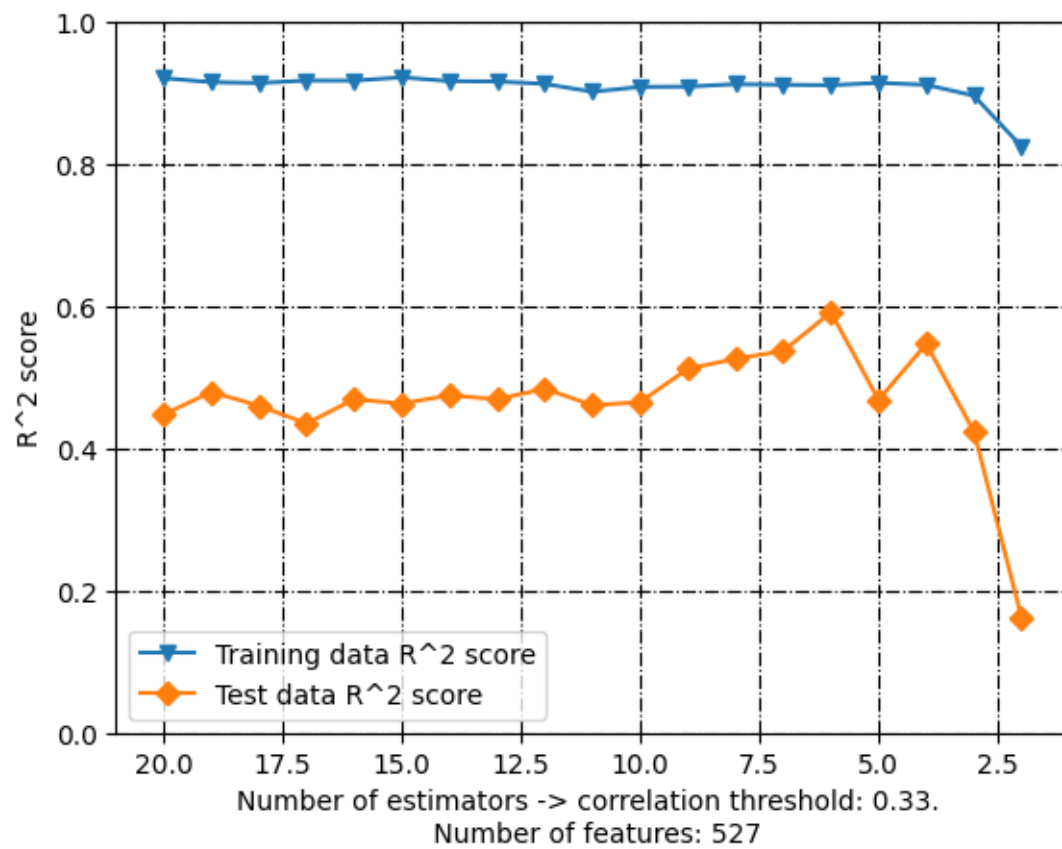

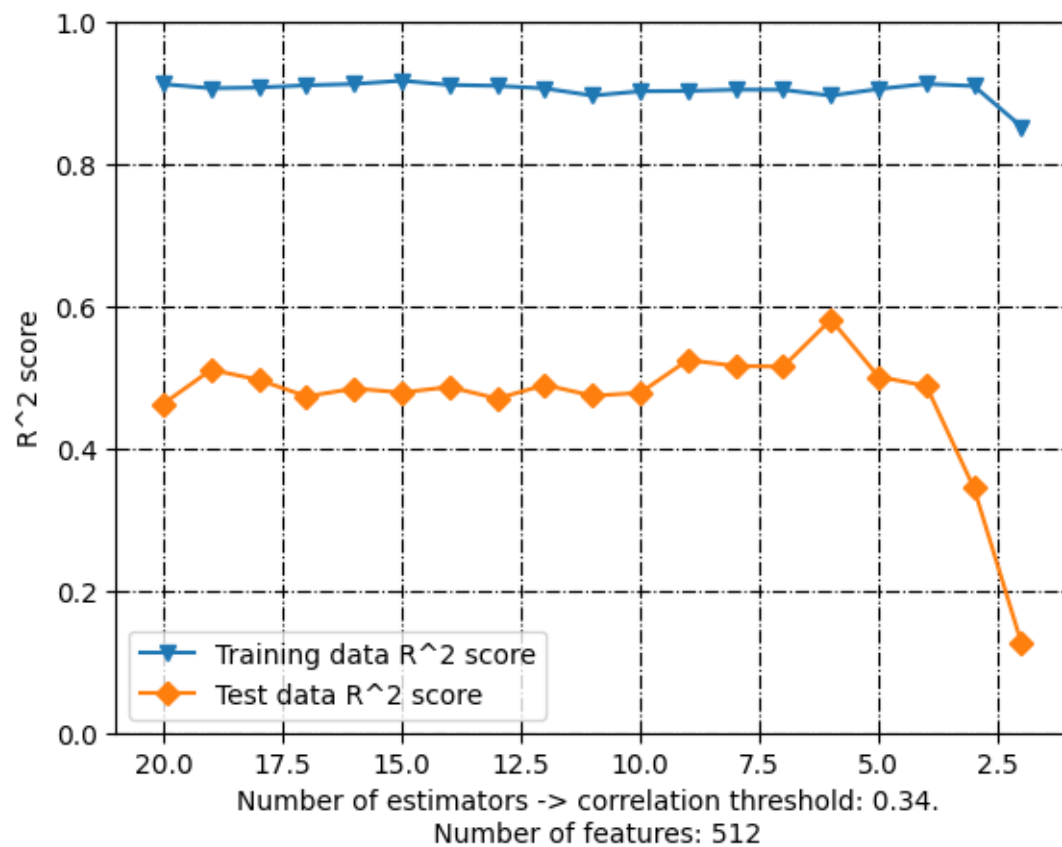

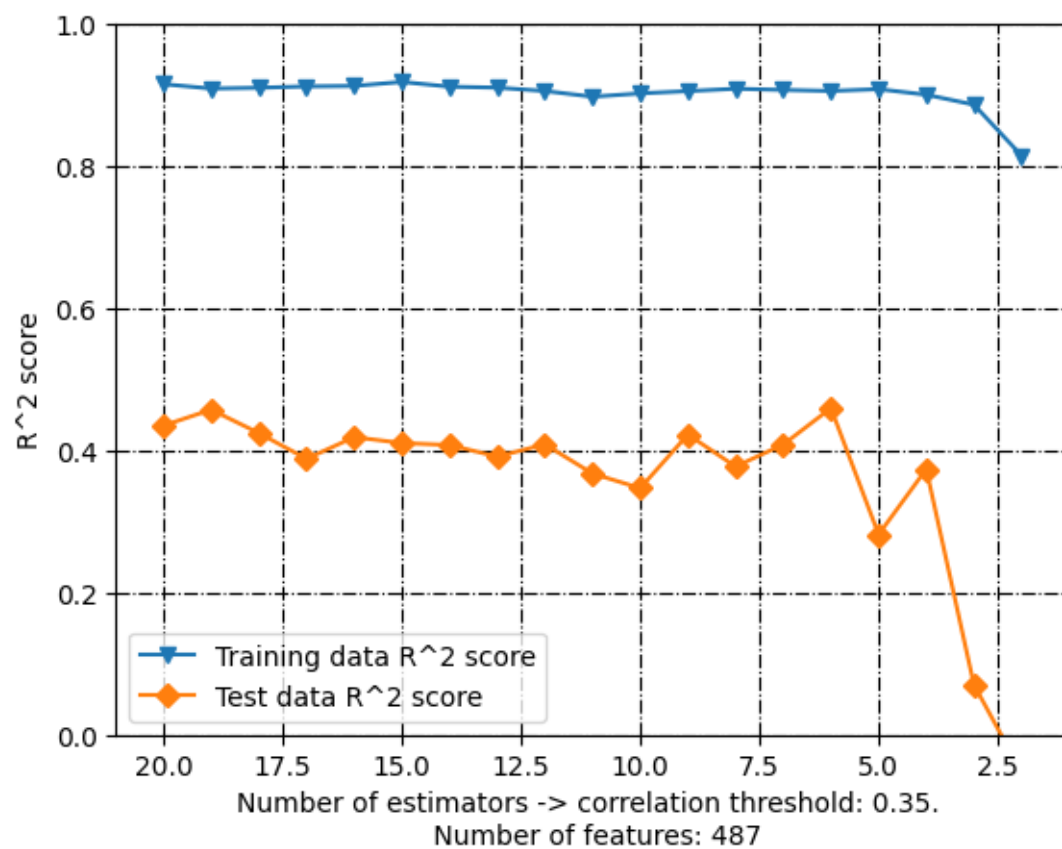



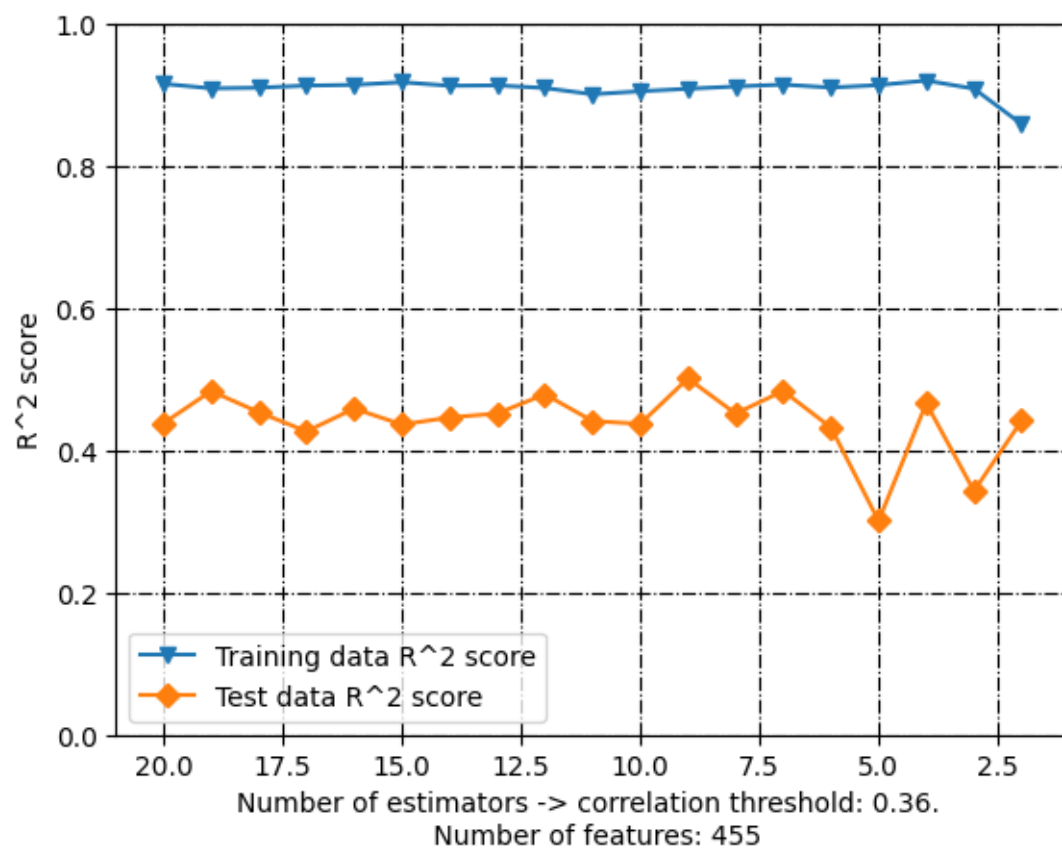

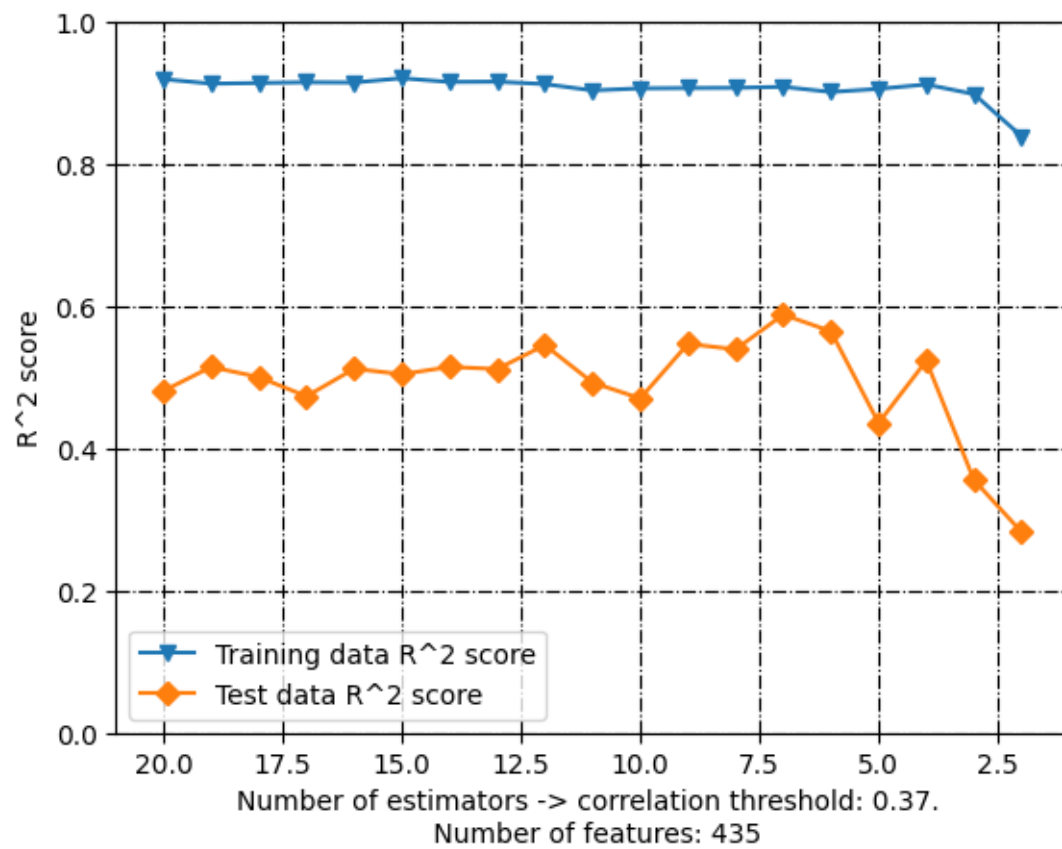

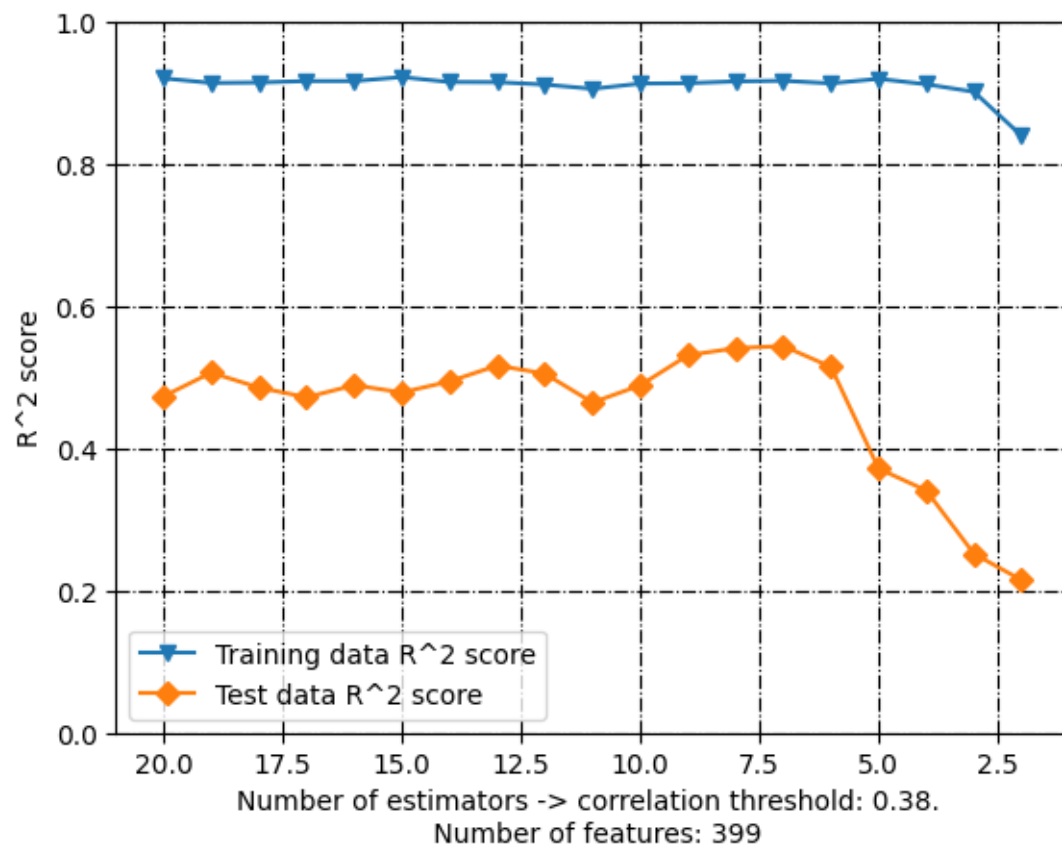

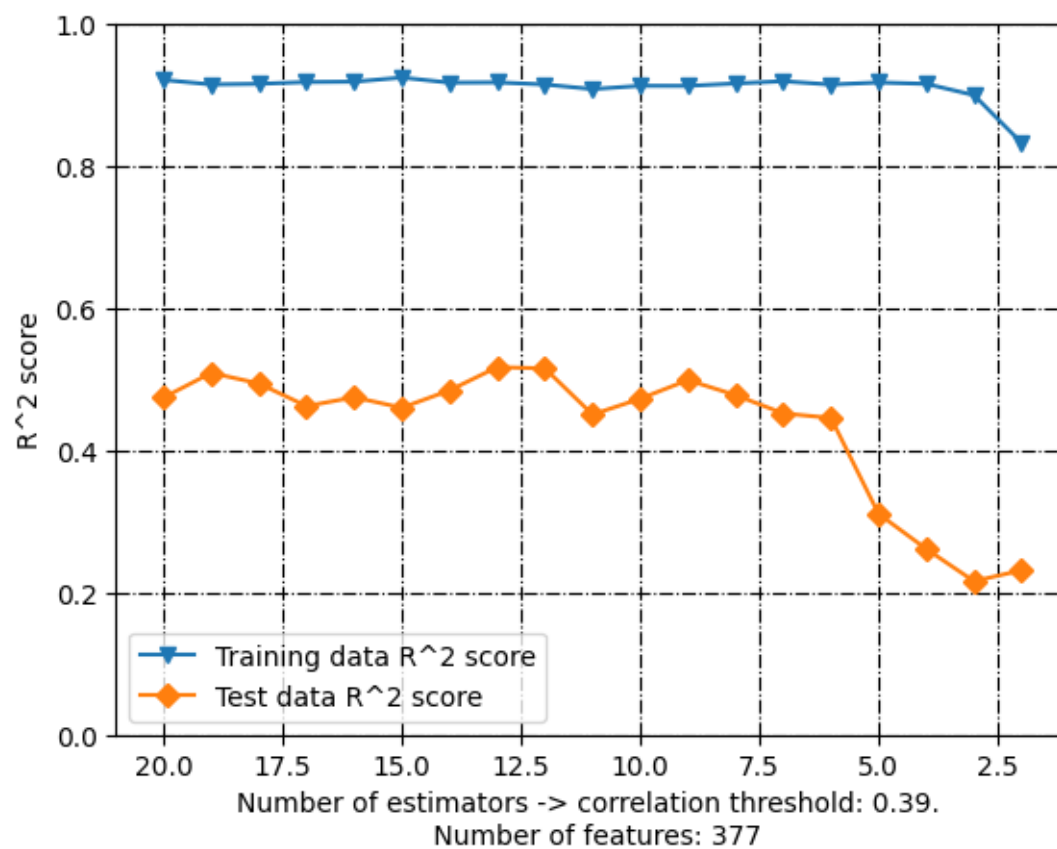

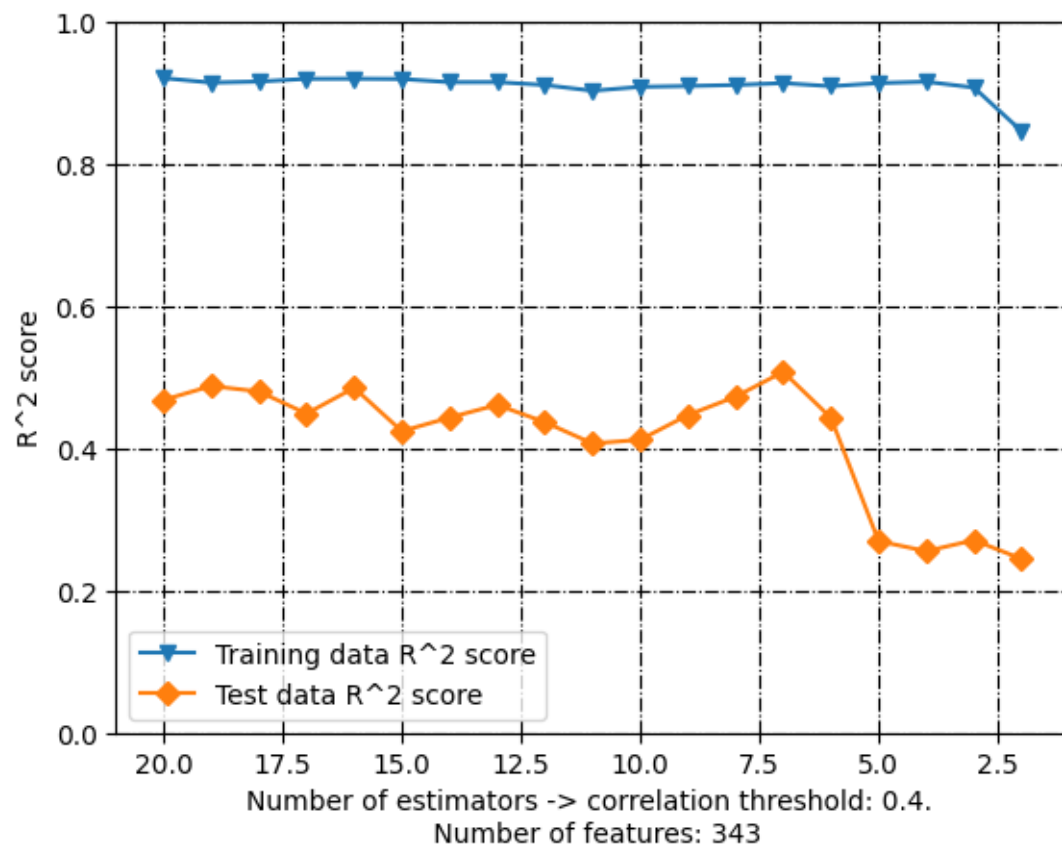

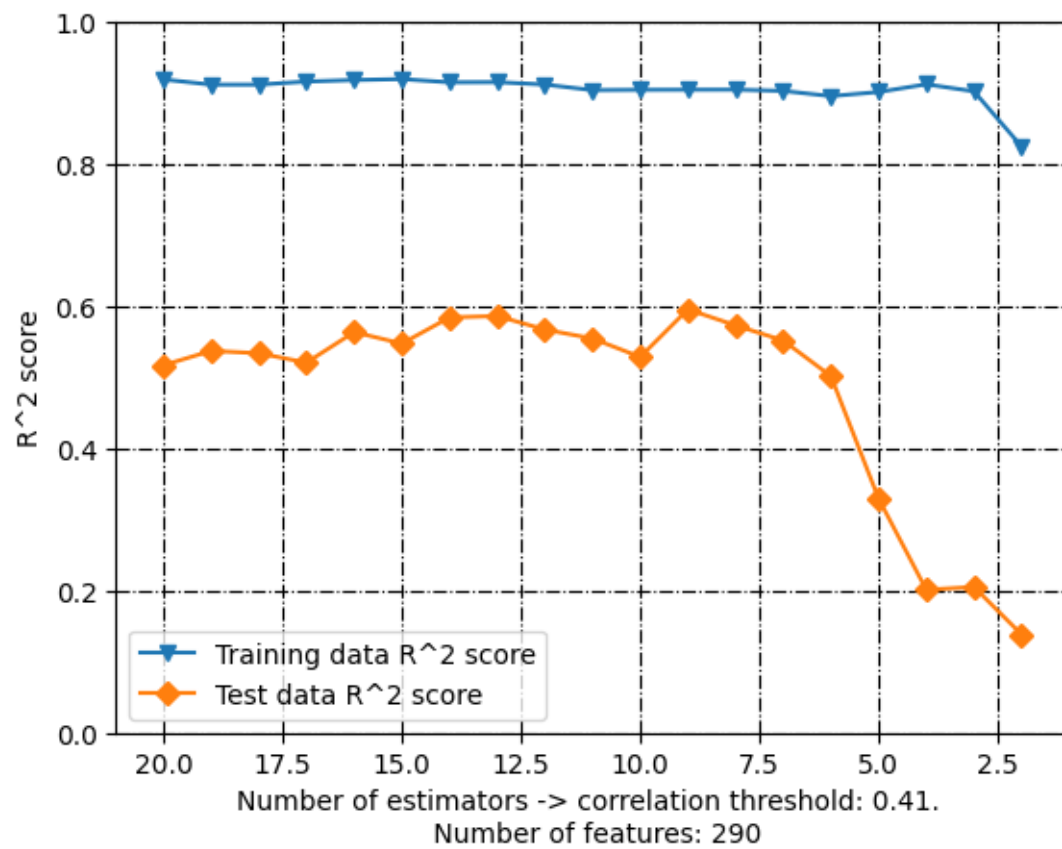

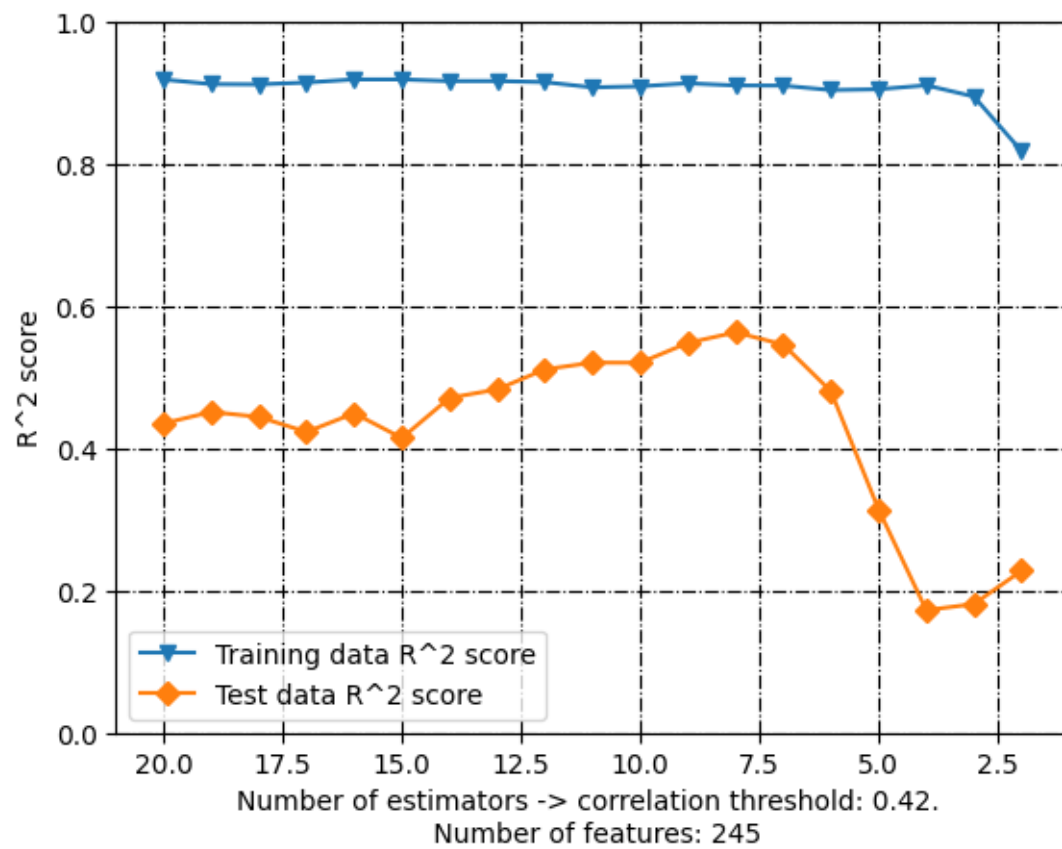

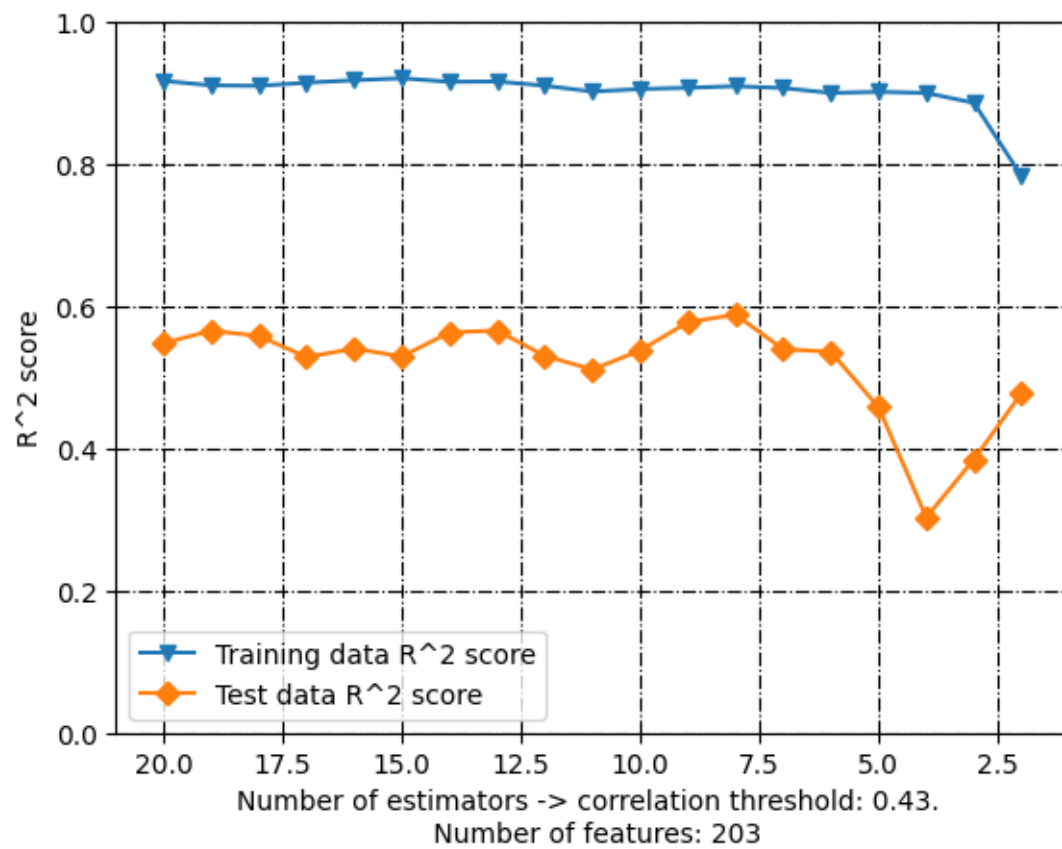



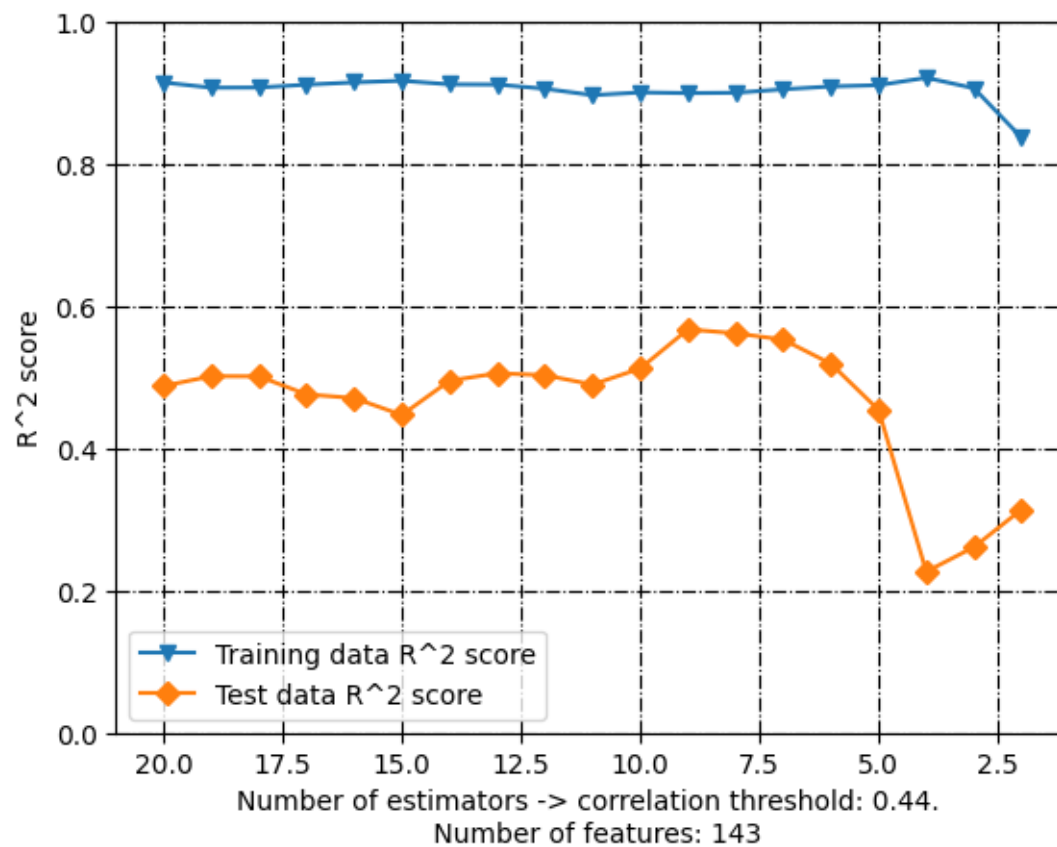

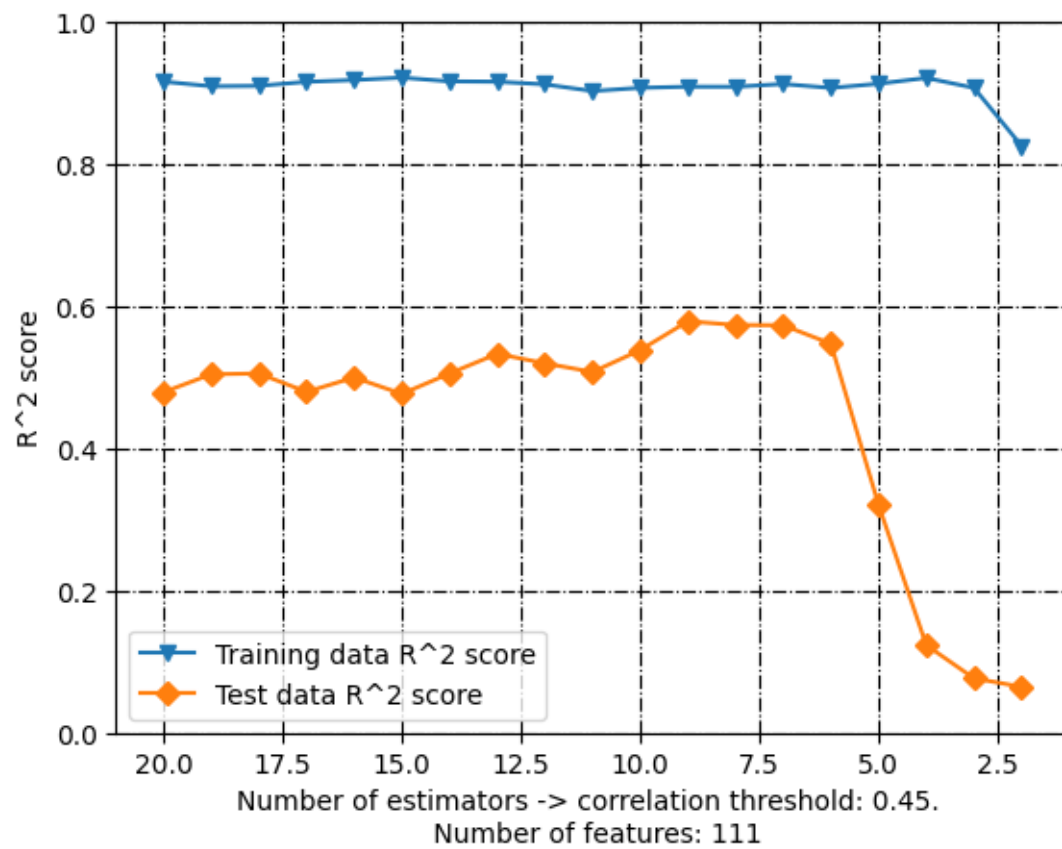

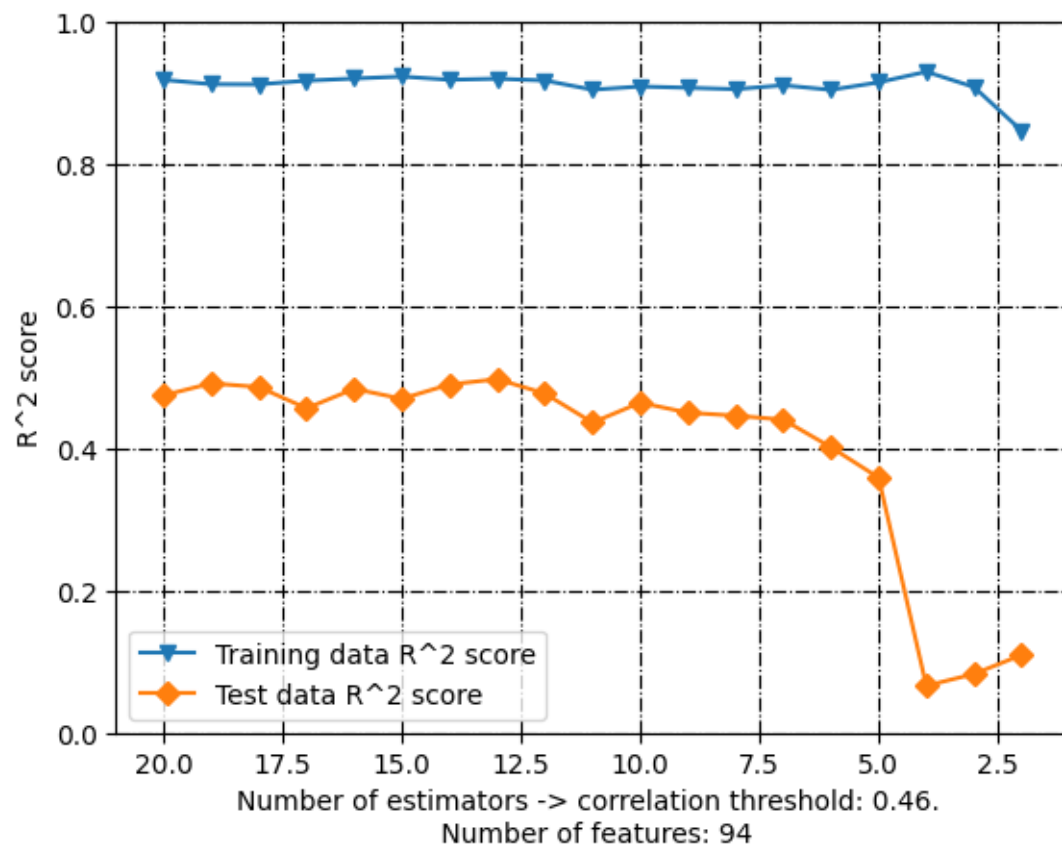

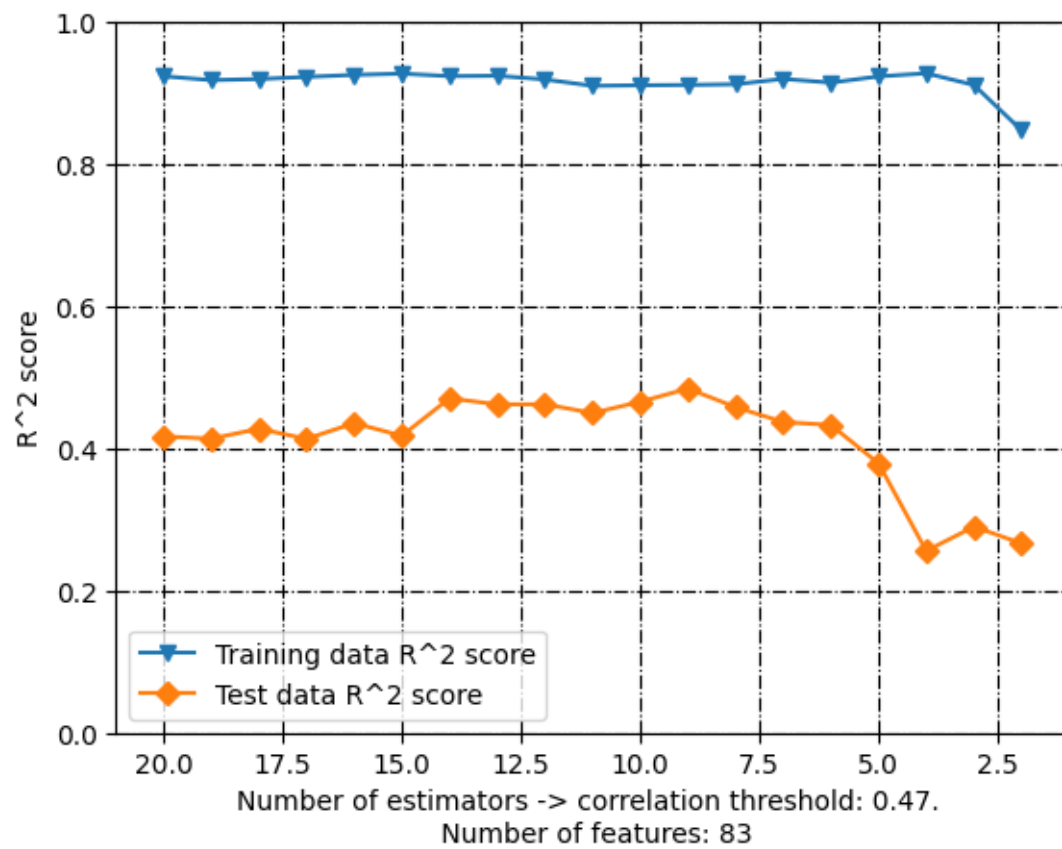

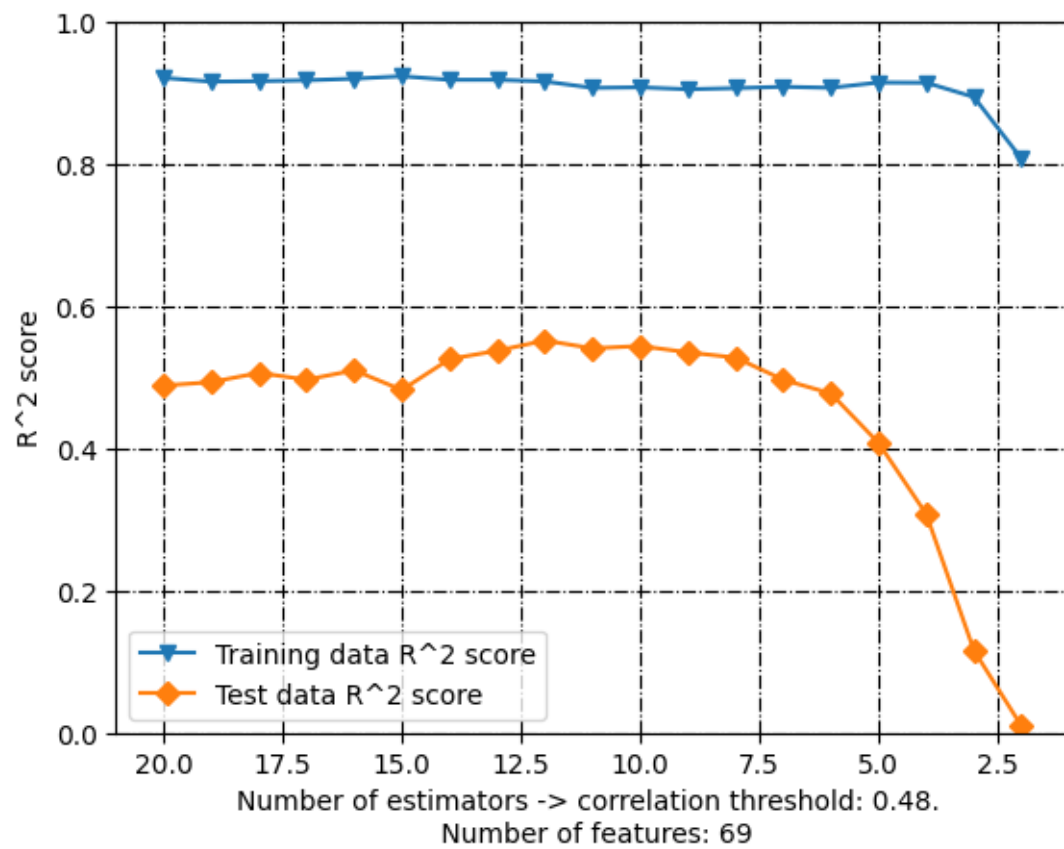

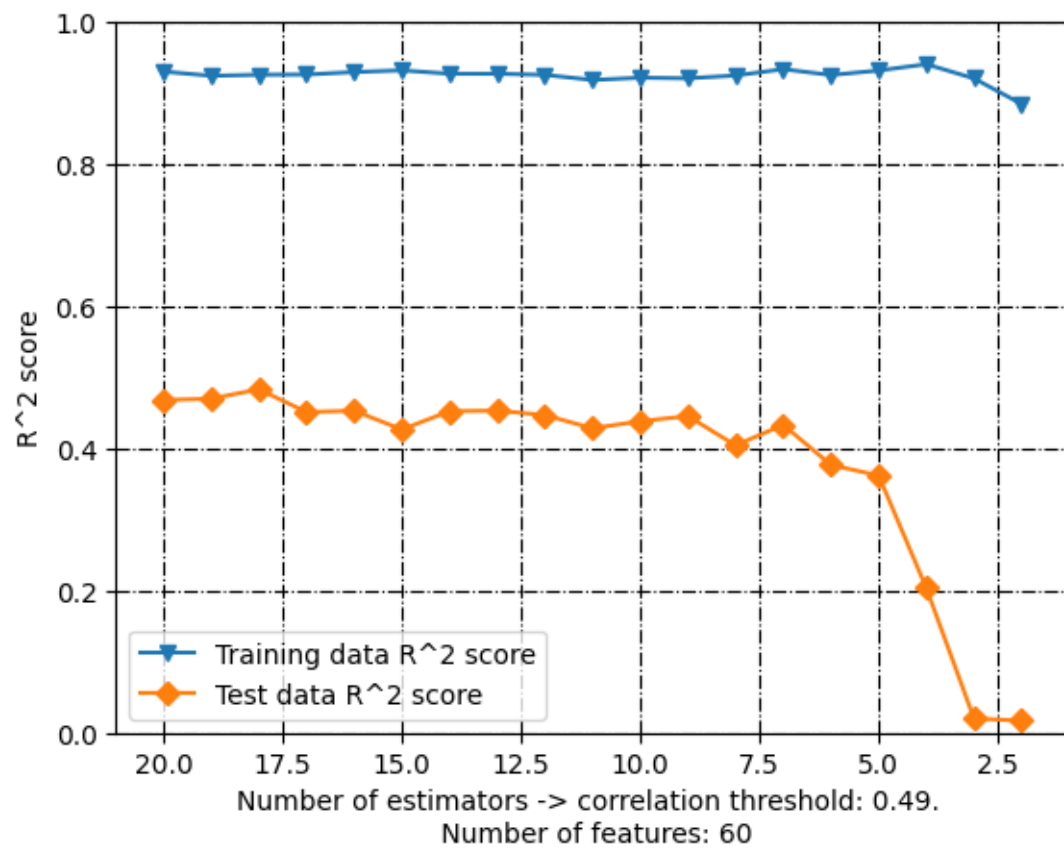

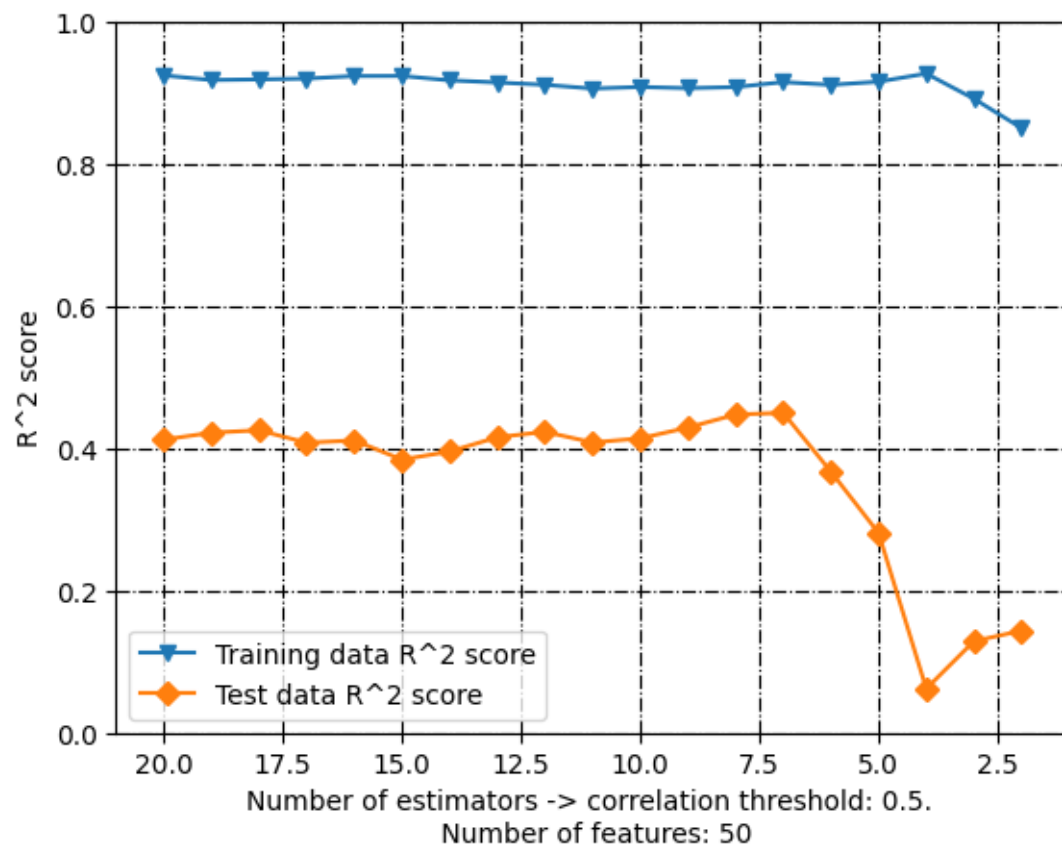

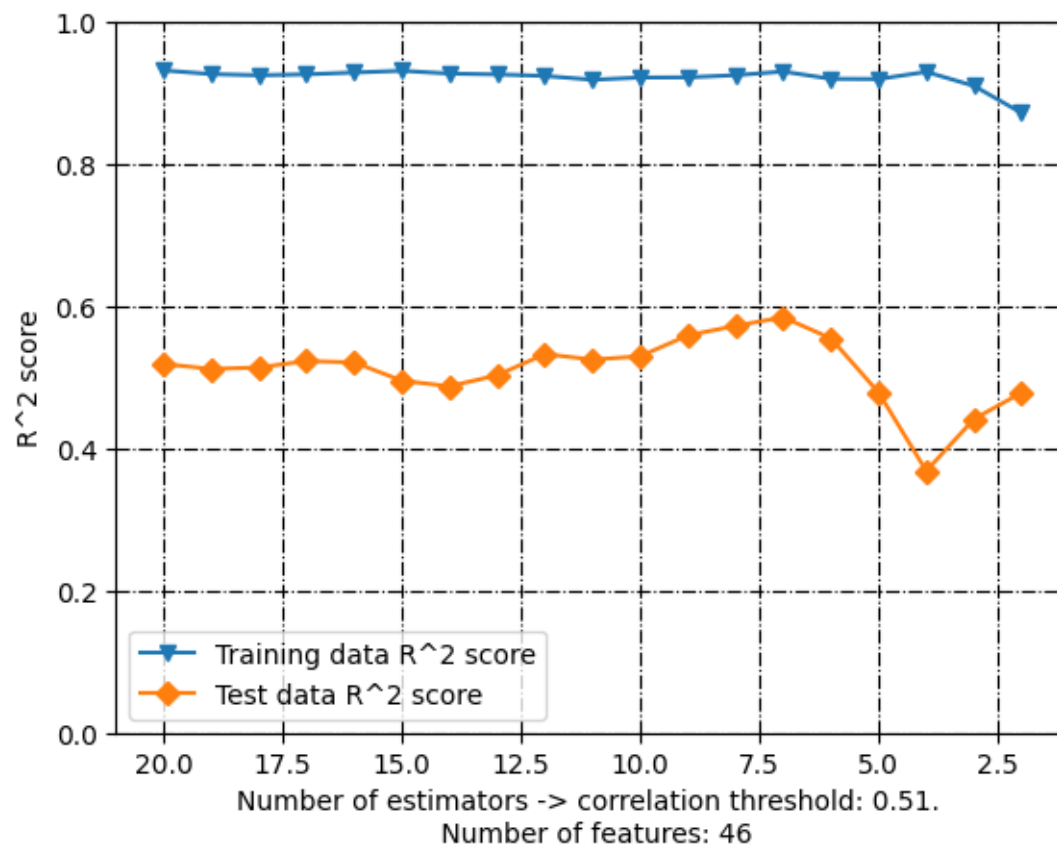



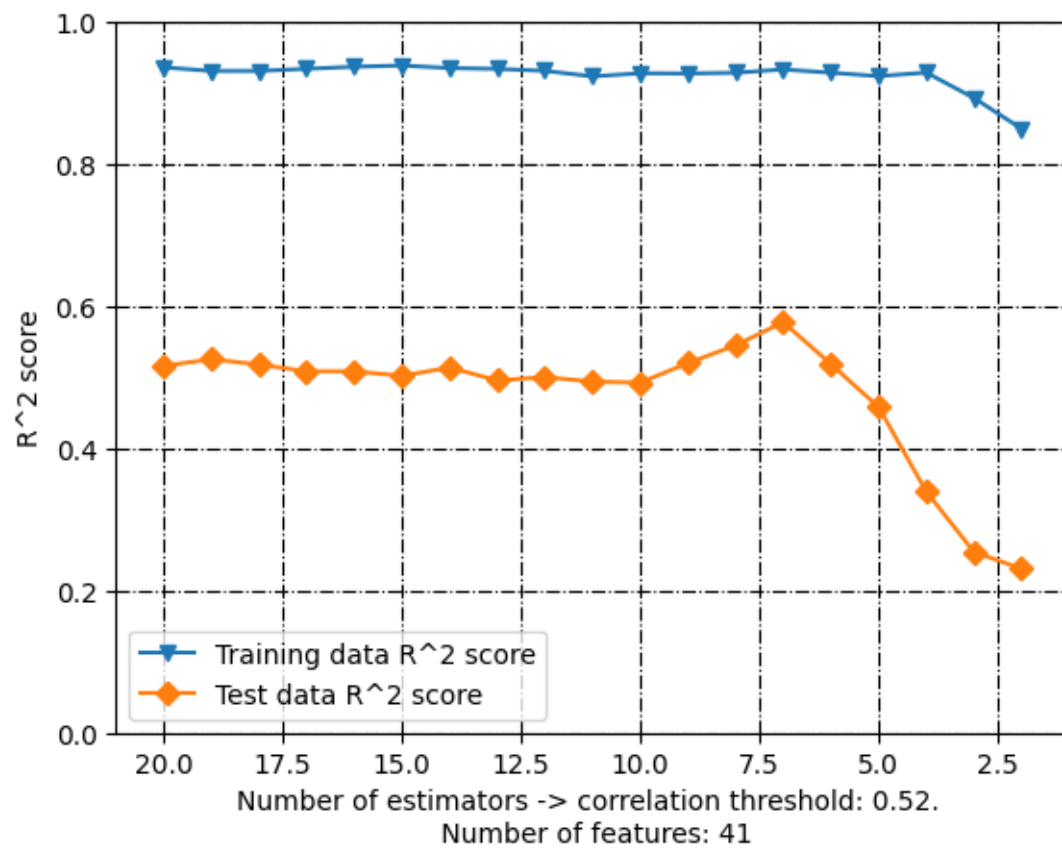

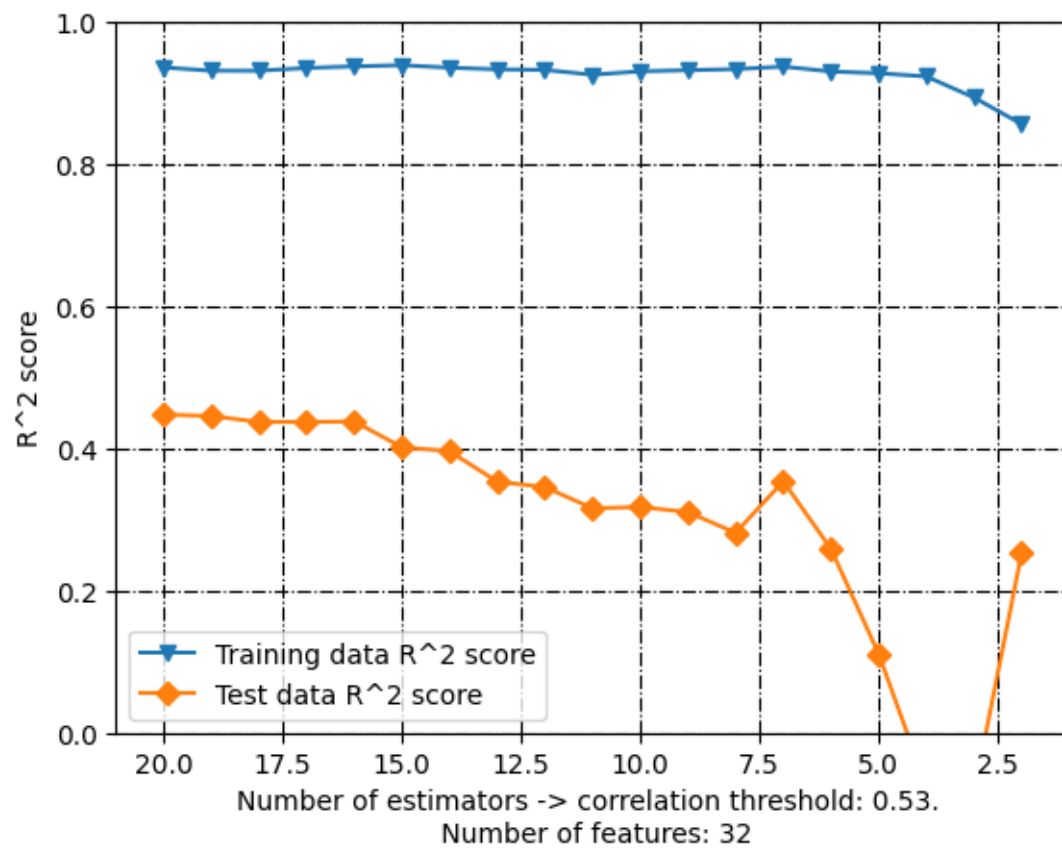

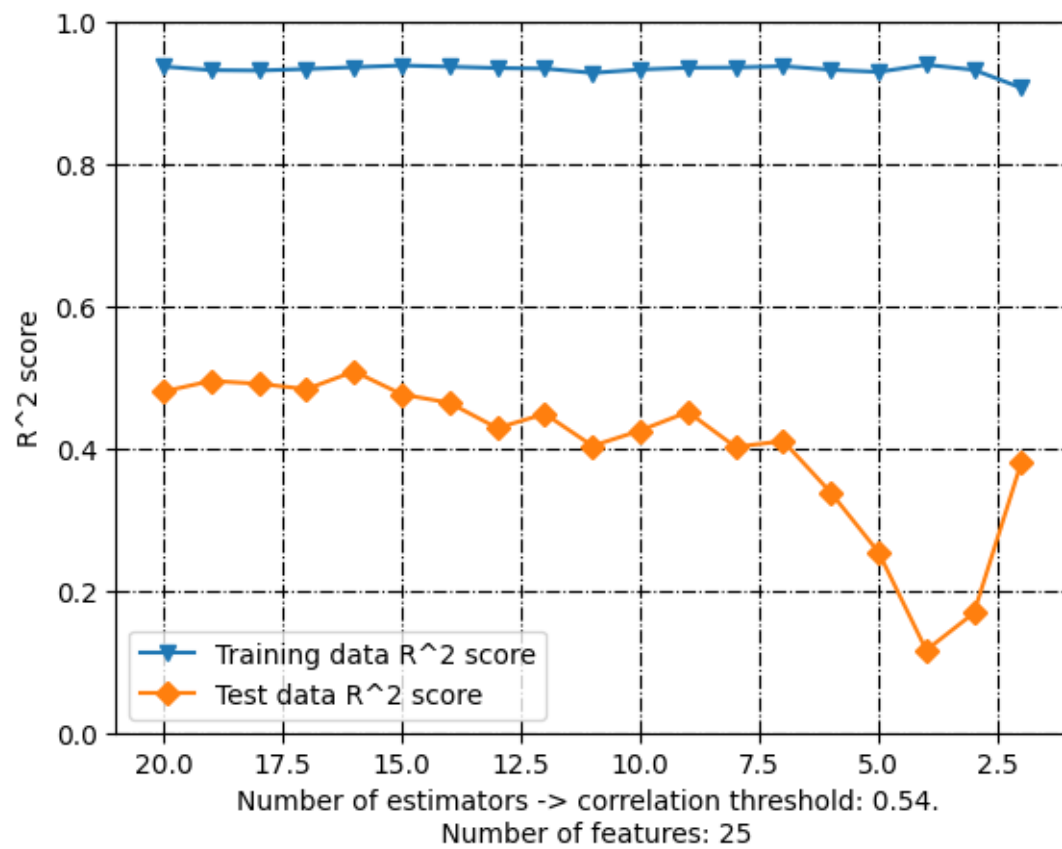

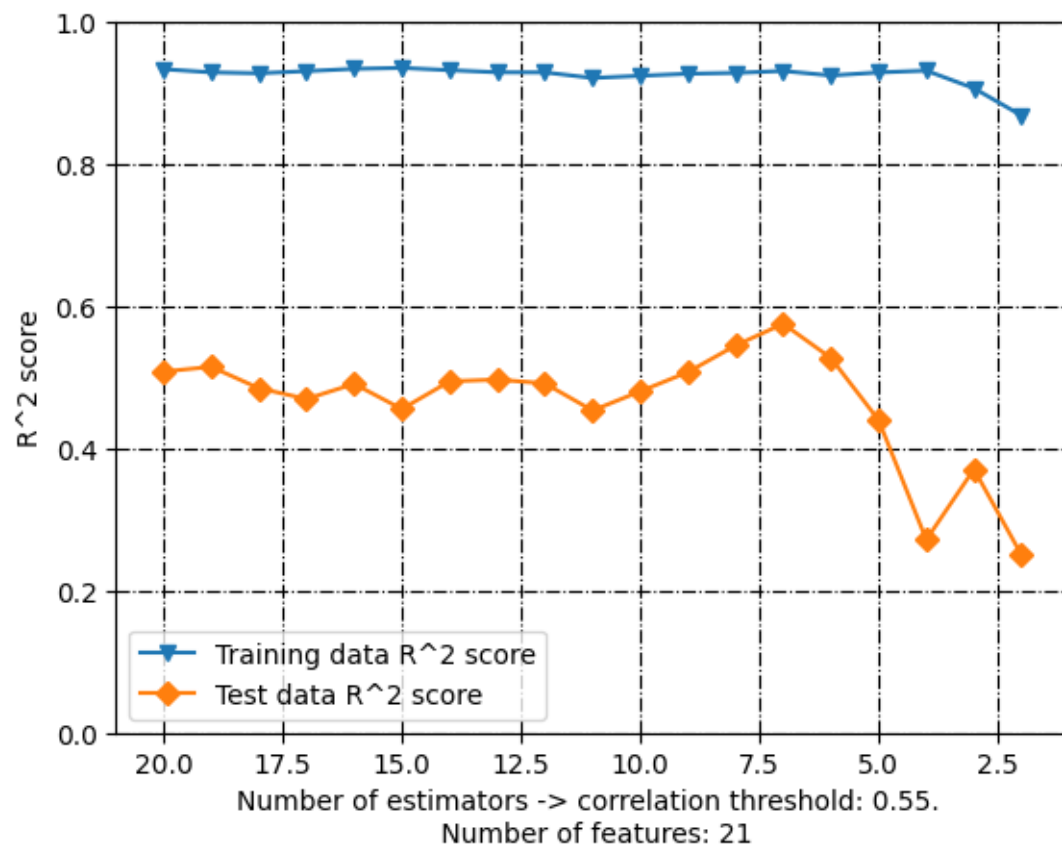

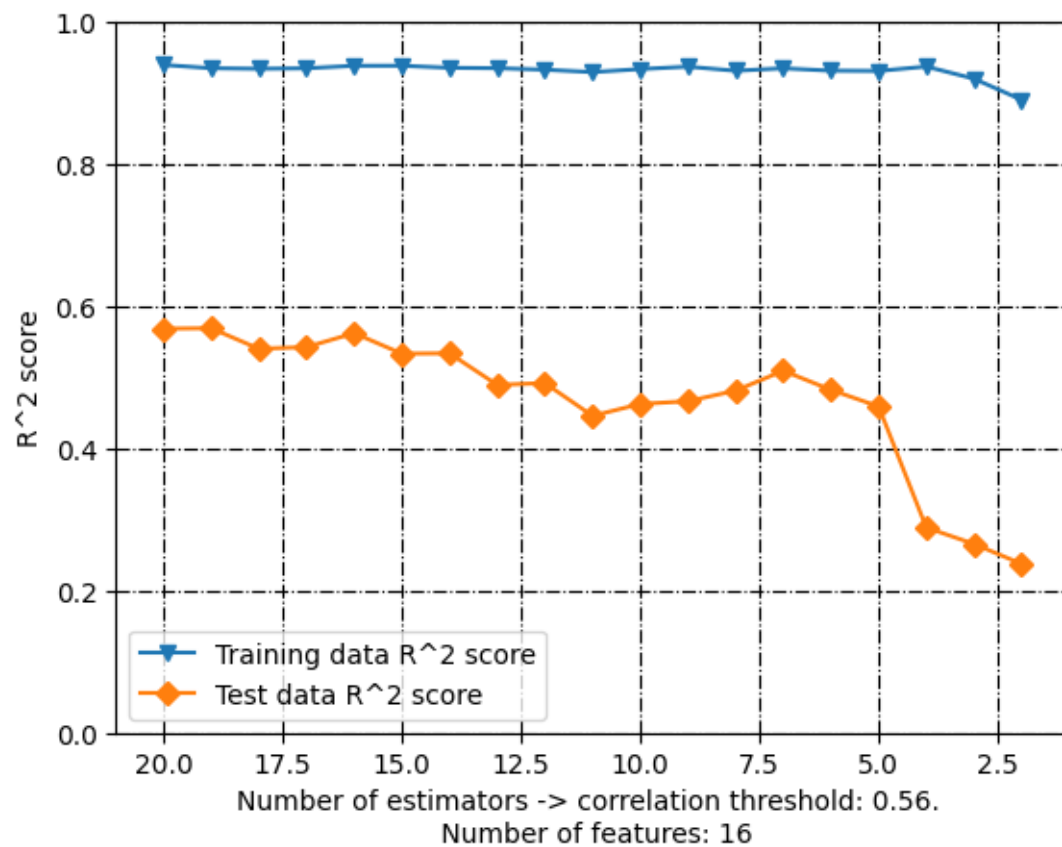

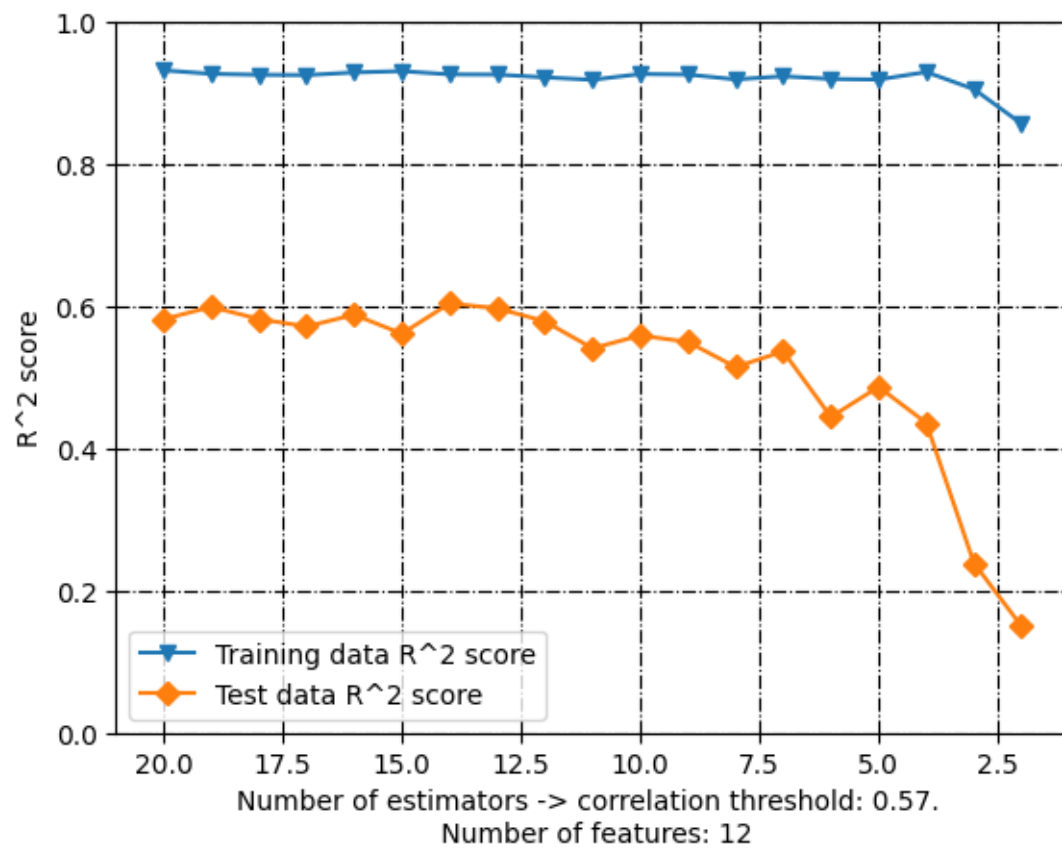

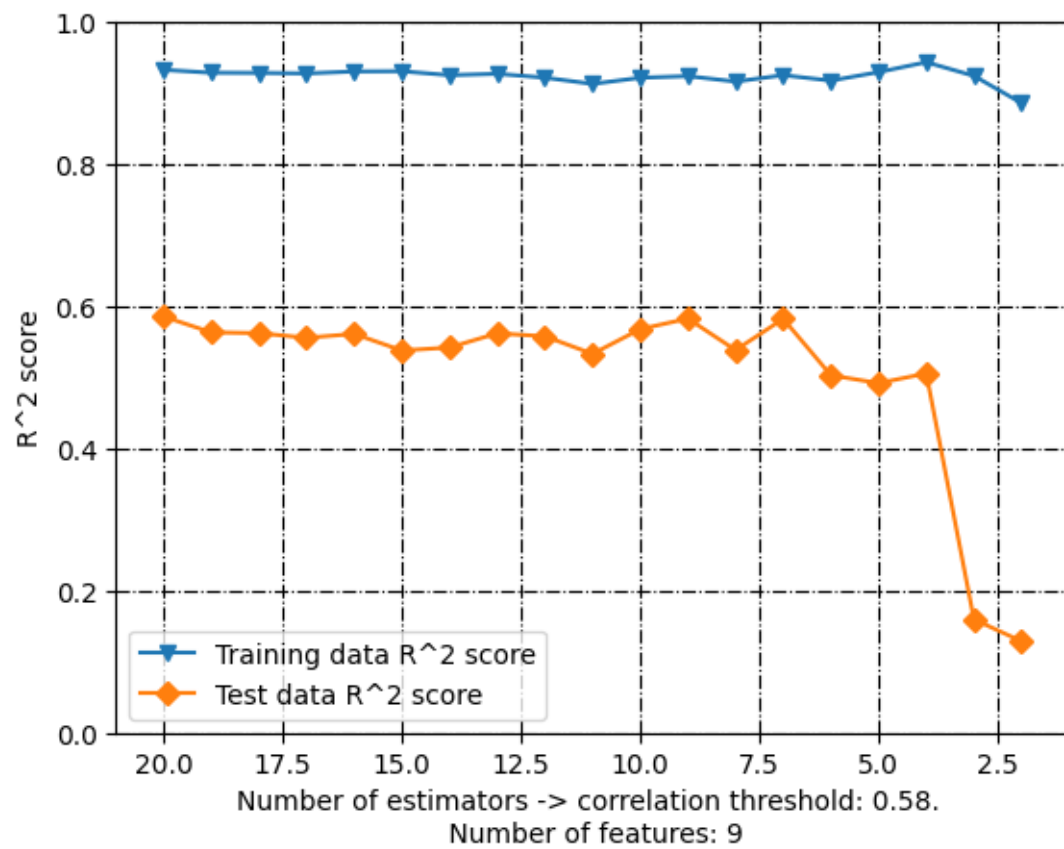

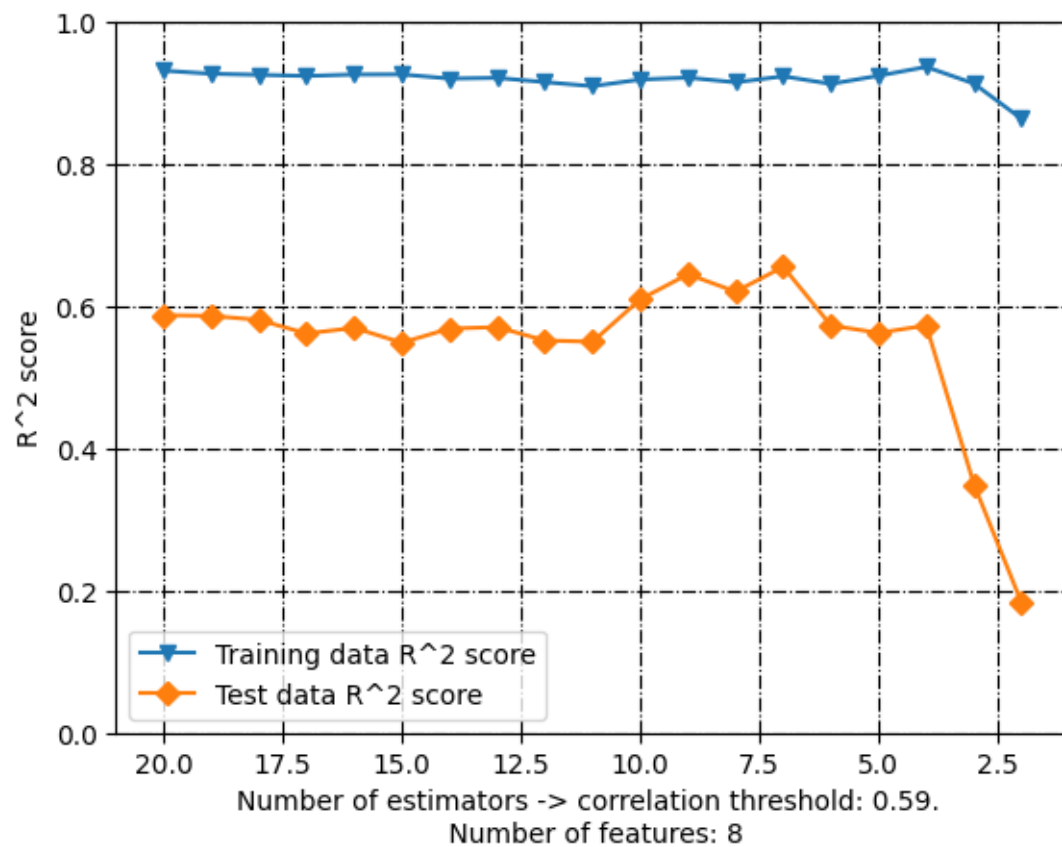



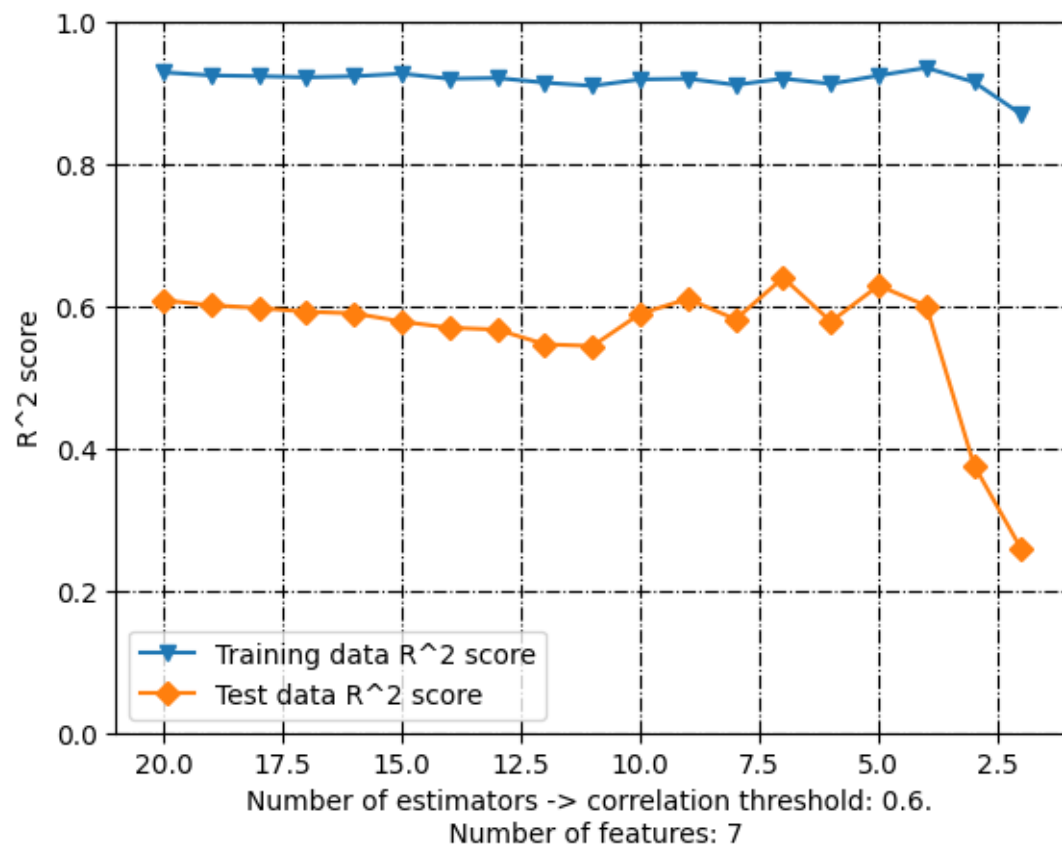

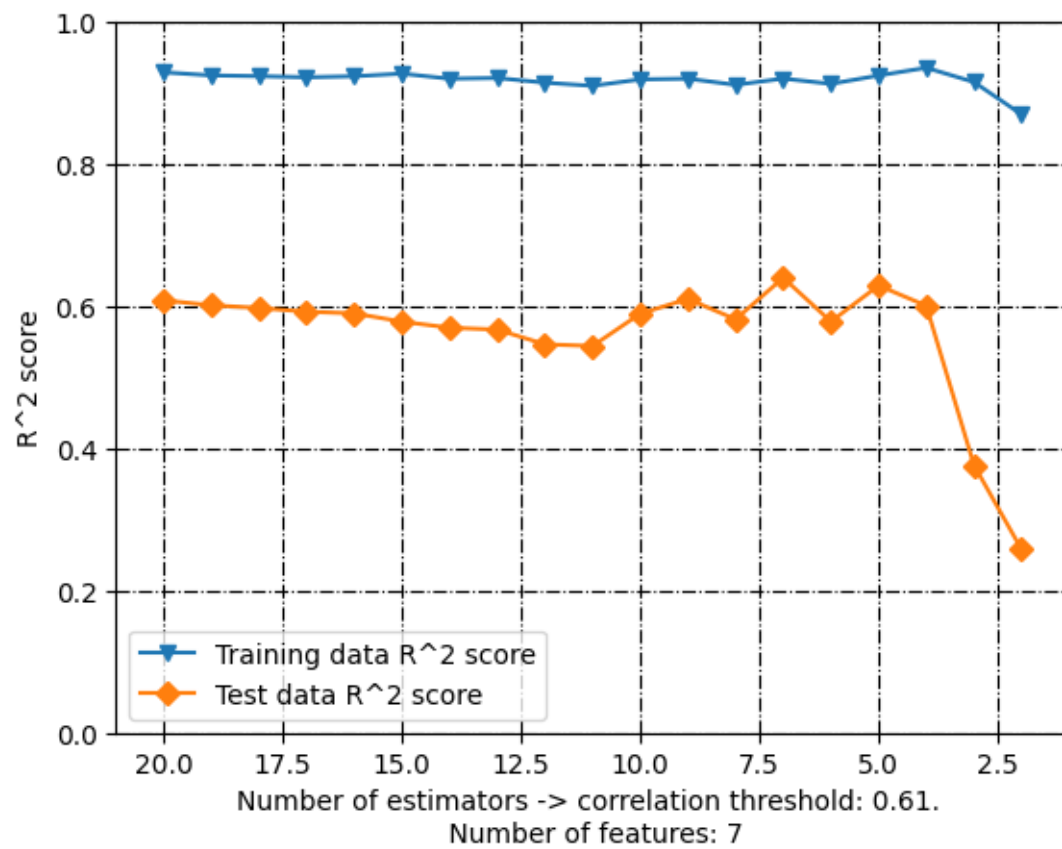

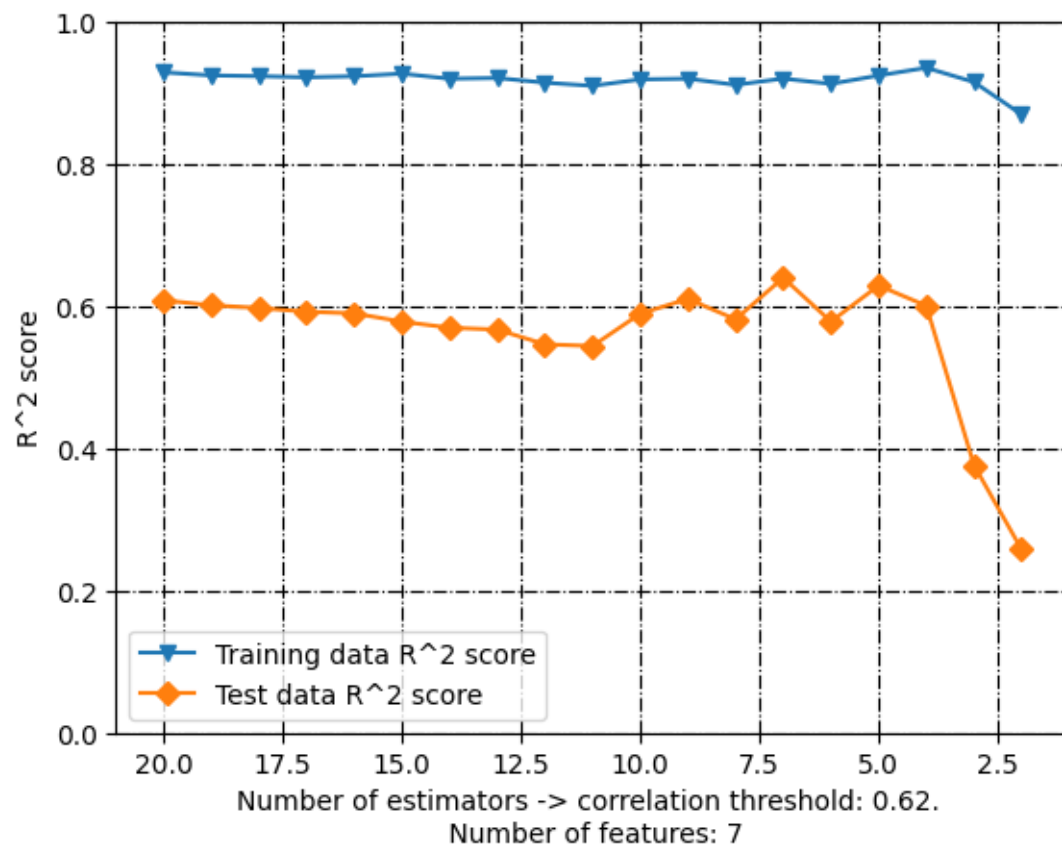

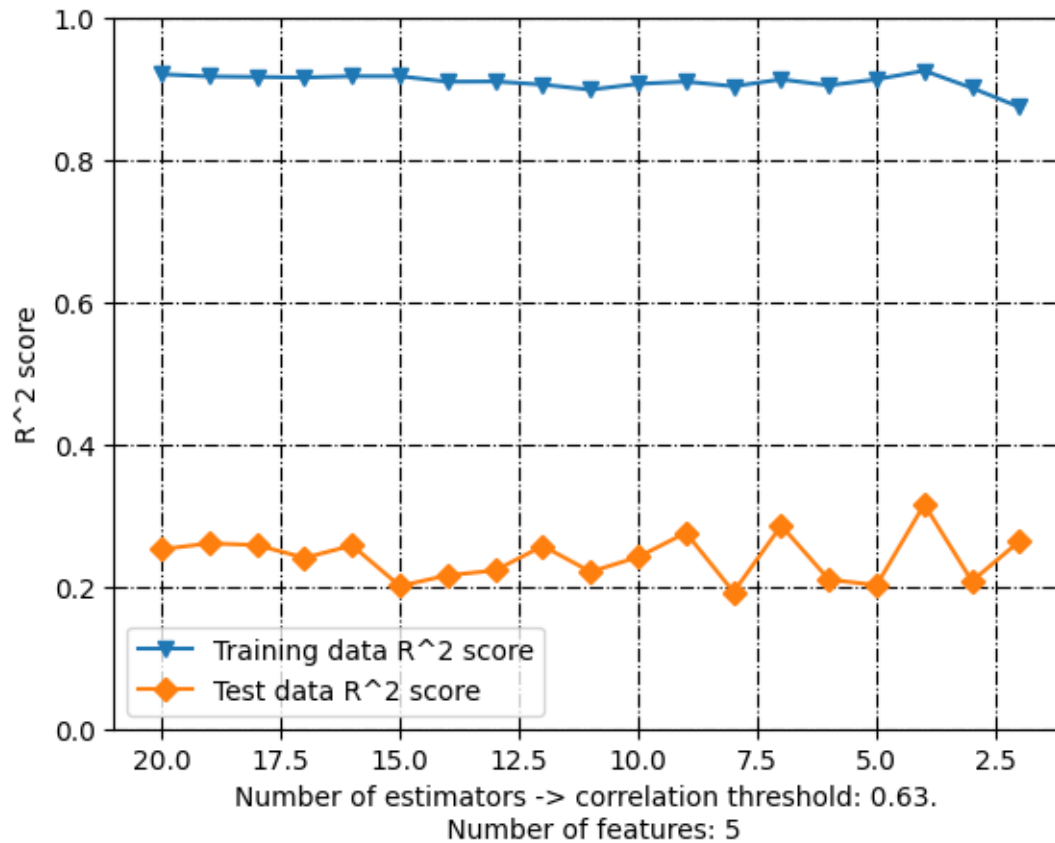

```
[29]: plt.plot(df_without_standardization['Correlation threshold'],  
             df_without_standardization['Number of features'], label = "Number of  
             features", marker='.')  
plt.legend()  
plt.xlabel('Correlation threshold')  
plt.ylabel('Number of features')  
plt.show()
```



[ ]:

## 4 KNeighborsRegressor

```
[30]: without_standardization, train_r2_, test_r2_, hist1, hist2, target_column_name,
      ↪ training_data_RMSE, test_data_RMSE = pred_model.
      ↪ prepare_data_and_create_model(molecular_descriptors_df=data,
      ↪
      ↪         correlation_threshold=0.50,
      ↪
      ↪         standardization=False,
      ↪
      ↪         model_type='KNeighborsRegressor',
      ↪
      ↪         target_column_name = target,
      ↪
      ↪         random_state=random_state,
      ↪
      ↪         train_test_split_=True,
```

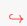

verbose=True)



I am not doing standardization...

```
molecular descriptor name
0          AATSOZ
1          AATSOare
2          AATSOd
3          AATSOdv
4          AATSOi
molecular descriptor name  corr_value
0          AATSOZ          0.018677
1          AATSOare        -0.341313
2          AATSOd          -0.123443
3          AATSOdv         -0.265670
4          AATSOi          -0.428929
molecular descriptor name  corr_value  absolute correlation value
0          AATSOZ          0.018677          0.018677
1          AATSOare        -0.341313          0.341313
2          AATSOd          -0.123443          0.123443
3          AATSOdv         -0.265670          0.265670
4          AATSOi          -0.428929          0.428929
molecular descriptor name  corr_value  absolute correlation value
15          AATS1i         -0.561620          0.561620
113         AATSC1c         0.565682          0.565682
125         AATSC2c        -0.543393          0.543393
221         AETA_eta_R     -0.515778          0.515778
224         AMID_C         0.532458          0.532458
molecular descriptor name  corr_value  absolute correlation value
15          AATS1i         -0.561620          0.561620
113         AATSC1c         0.565682          0.565682
125         AATSC2c        -0.543393          0.543393
221         AETA_eta_R     -0.515778          0.515778
224         AMID_C         0.532458          0.532458
```

The model used is: KNeighbors...

Return the coefficient of determination of the prediction:

-0.5245164414023789

R<sup>2</sup> score: 0.641306136499944

Correlation coefficient: 0.8008159192348413

Test data - unseen during training:

R<sup>2</sup> score: -0.5245164414023789

Correlation coefficient: nan

```
[7.54260641 7.23551212 7.20230296 6.71036235 5.90869339 6.95171104
 7.00759247 5.47686477 6.95171104 7.01252472 5.94299531 6.12750954
 5.70879728 6.83491425 5.87714714 7.45272435]
```

0 7.260428

21 6.398375

106 5.853872

```
68      6.080922
44      7.638272
14      7.067526
108     6.154902
62      6.455932
13      7.158641
9       5.702436
96      5.136677
49      5.619789
54      7.075721
114     6.026872
115     5.568636
87      7.288193
```

```
Name: LoVo/DX, dtype: float64
```

```
Training Root Mean Square Error: 0.5752818369342935
```

```
Testing Root Mean Square Error: 0.9012538828554976
```

```
File "C:\Users\aleks\anaconda3\envs\cheminf_gpu\lib\site-
packages\joblib\externals\loky\backend\context.py", line 217, in
_count_physical_cores
    raise ValueError(
```

```
[31]: print(target_column_name+str('_transformed'))
      print(hist1[target_column_name].hist())
```

```
LoVo/DX_transformed
```

```
AxesSubplot(0.125,0.11;0.775x0.77)
```



```
[32]: with_standardization, train_r2_, test_r2_, hist1, hist2, target_column_name,
      ↪ training_data_RMSE, test_data_RMSE = pred_model.
      ↪ prepare_data_and_create_model(molecular_descriptors_df=data,
      ↪
      ↪         correlation_threshold=0.50,
      ↪
      ↪         standardization=True,
      ↪
      ↪         model_type='KNeighborsRegressor',
      ↪
      ↪         target_column_name = target,
      ↪
      ↪         random_state=random_state,
      ↪
      ↪         train_test_split_=True,
      ↪
      ↪         verbose=True)
```

I am doing standardization...

|   | molecular descriptor name |
|---|---------------------------|
| 0 | AATS0Z                    |
| 1 | AATS0are                  |



```

2          AATS0d
3          AATS0dv
4          AATS0i
molecular descriptor name  corr_value
0          AATS0Z      0.018677
1          AATS0are    -0.341313
2          AATS0d      -0.123443
3          AATS0dv     -0.265670
4          AATS0i      -0.428929
molecular descriptor name  corr_value  absolute correlation value
0          AATS0Z      0.018677      0.018677
1          AATS0are    -0.341313      0.341313
2          AATS0d      -0.123443      0.123443
3          AATS0dv     -0.265670      0.265670
4          AATS0i      -0.428929      0.428929
molecular descriptor name  corr_value  absolute correlation value
15         AATS1i      -0.561620      0.561620
113        AATSC1c      0.565682      0.565682
125        AATSC2c     -0.543393      0.543393
221        AETA_eta_R  -0.515778      0.515778
224        AMID_C      0.532458      0.532458
molecular descriptor name  corr_value  absolute correlation value
15         AATS1i      -0.561620      0.561620
113        AATSC1c      0.565682      0.565682
125        AATSC2c     -0.543393      0.543393
221        AETA_eta_R  -0.515778      0.515778
224        AMID_C      0.532458      0.532458
The model used is: KNeighbors...
Return the coefficient of determination of the prediction:
-0.5245164414023789
R^2 score: 0.641306136499944
Correlation coefficient: 0.8008159192348413
Test data - unseen during training:
R^2 score: -0.5245164414023789
Correlation coefficient: nan
[7.54260641 7.23551212 7.20230296 6.71036235 5.90869339 6.95171104
 7.00759247 5.47686477 6.95171104 7.01252472 5.94299531 6.12750954
 5.70879728 6.83491425 5.87714714 7.45272435]
0          7.260428
21         6.398375
106        5.853872
68         6.080922
44         7.638272
14         7.067526
108        6.154902
62         6.455932
13         7.158641
9          5.702436

```

```

96     5.136677
49     5.619789
54     7.075721
114    6.026872
115    5.568636
87     7.288193
Name: LoVo/DX, dtype: float64
Training Root Mean Square Error: 0.5752818369342935
Testing Root Mean Square Error: 0.9012538828554976

```

## 4.1 Search inside correlation space

```

[33]: step = 0.01
initial_step = corr_low
last_step = corr_high
first_list = [x / 100.0 for x in range(int(initial_step*100),
    ↪int(last_step*100), int(step*100))]
second_list = []
third_list = []
fourth_l = []
fifth_l = []
f_list = []
for i in first_list:
    without_standardization, train_r2, test_r2, _, h_, target_column_name,
    ↪training_data_RMSE, test_data_RMSE = pred_model.
    ↪prepare_data_and_create_model(molecular_descriptors_df = data,

    ↪                                correlation_threshold = i,

    ↪                                standardization = False,

    ↪                                model_type = 'KNeighborsRegressor',

    ↪                                target_column_name = target,

    ↪                                random_state=random_state,

    ↪                                train_test_split_ = True,

    ↪                                verbose = False)
    second_list.append(train_r2)
    third_list.append(test_r2)
    fourth_l.append(training_data_RMSE)
    fifth_l.append(test_data_RMSE)
    f_list.append(len(h_))

```

```
[34]: df_without_standardization = pd.DataFrame(data=first_list,
        ↪columns=["Correlation threshold"])
df_without_standardization['Training data R^2 score'] = second_list
df_without_standardization['Test data R^2 score'] = third_list
df_without_standardization['Training RMSE'] = fourth_l
df_without_standardization['Test RMSE'] = fifth_l
df_without_standardization['Number of features'] = f_list
```

```
[35]: df_k_nearest = df_without_standardization.copy()
df_without_standardization
```

```
[35]:
```

|    | Correlation threshold | Training data R^2 score | Test data R^2 score | \ |
|----|-----------------------|-------------------------|---------------------|---|
| 0  | 0.33                  | 0.479264                | -0.091260           |   |
| 1  | 0.34                  | 0.449586                | -0.540179           |   |
| 2  | 0.35                  | 0.474786                | -0.434286           |   |
| 3  | 0.36                  | 0.455877                | -0.579715           |   |
| 4  | 0.37                  | 0.455877                | -0.579715           |   |
| 5  | 0.38                  | 0.510462                | -0.694617           |   |
| 6  | 0.39                  | 0.515700                | -0.472243           |   |
| 7  | 0.40                  | 0.525052                | -0.480476           |   |
| 8  | 0.41                  | 0.510964                | -0.428514           |   |
| 9  | 0.42                  | 0.574199                | -1.196495           |   |
| 10 | 0.43                  | 0.543995                | -1.125321           |   |
| 11 | 0.44                  | 0.536471                | -1.116713           |   |
| 12 | 0.45                  | 0.502059                | -1.147740           |   |
| 13 | 0.46                  | 0.520034                | -1.026238           |   |
| 14 | 0.47                  | 0.510079                | -1.026786           |   |
| 15 | 0.48                  | 0.611073                | -0.500654           |   |
| 16 | 0.49                  | 0.625599                | -0.495928           |   |
| 17 | 0.50                  | 0.641306                | -0.524516           |   |
| 18 | 0.51                  | 0.604986                | -0.279072           |   |
| 19 | 0.52                  | 0.609748                | -0.279072           |   |
| 20 | 0.53                  | 0.676802                | -0.104932           |   |
| 21 | 0.54                  | 0.660569                | -0.008270           |   |
| 22 | 0.55                  | 0.694005                | -0.119325           |   |
| 23 | 0.56                  | 0.702567                | -0.029016           |   |
| 24 | 0.57                  | 0.697715                | 0.090609            |   |
| 25 | 0.58                  | 0.696547                | 0.013541            |   |
| 26 | 0.59                  | 0.696236                | 0.013541            |   |
| 27 | 0.60                  | 0.704246                | 0.001790            |   |
| 28 | 0.61                  | 0.704246                | 0.001790            |   |
| 29 | 0.62                  | 0.704246                | 0.001790            |   |
| 30 | 0.63                  | 0.696019                | -0.060309           |   |

  

|   | Training RMSE | Test RMSE | Number of features |
|---|---------------|-----------|--------------------|
| 0 | 0.693150      | 0.762509  | 527                |
| 1 | 0.712629      | 0.905872  | 512                |

|    |          |          |     |
|----|----------|----------|-----|
| 2  | 0.696124 | 0.874176 | 487 |
| 3  | 0.708545 | 0.917425 | 455 |
| 4  | 0.708545 | 0.917425 | 435 |
| 5  | 0.672066 | 0.950204 | 399 |
| 6  | 0.668461 | 0.885668 | 377 |
| 7  | 0.661975 | 0.888141 | 343 |
| 8  | 0.671721 | 0.872416 | 290 |
| 9  | 0.626790 | 1.081798 | 245 |
| 10 | 0.648640 | 1.064127 | 203 |
| 11 | 0.653969 | 1.061970 | 143 |
| 12 | 0.677809 | 1.069725 | 111 |
| 13 | 0.665463 | 1.039026 | 94  |
| 14 | 0.672329 | 1.039166 | 83  |
| 15 | 0.599036 | 0.894173 | 69  |
| 16 | 0.587743 | 0.892764 | 60  |
| 17 | 0.575282 | 0.901254 | 50  |
| 18 | 0.603705 | 0.825522 | 46  |
| 19 | 0.600055 | 0.825522 | 41  |
| 20 | 0.546076 | 0.767271 | 32  |
| 21 | 0.559621 | 0.732942 | 25  |
| 22 | 0.531344 | 0.772252 | 21  |
| 23 | 0.523857 | 0.740444 | 16  |
| 24 | 0.528113 | 0.696075 | 12  |
| 25 | 0.529133 | 0.724971 | 9   |
| 26 | 0.529403 | 0.724971 | 8   |
| 27 | 0.522377 | 0.729276 | 7   |
| 28 | 0.522377 | 0.729276 | 7   |
| 29 | 0.522377 | 0.729276 | 7   |
| 30 | 0.529592 | 0.751618 | 5   |

## 4.2 Plots

```
[36]: plt.plot(df_without_standardization['Correlation threshold'],
             df_without_standardization['Training data R^2 score'], label = "Training
             data R^2 score", marker='v')
plt.plot(df_without_standardization['Correlation threshold'],
             df_without_standardization['Test data R^2 score'], label = "Test data R^2
             score", marker='D')
plt.legend()
plt.xlabel('Correlation threshold')
plt.ylabel('R^2 score')
plt.ylim([0, 1])
plt.show()
```

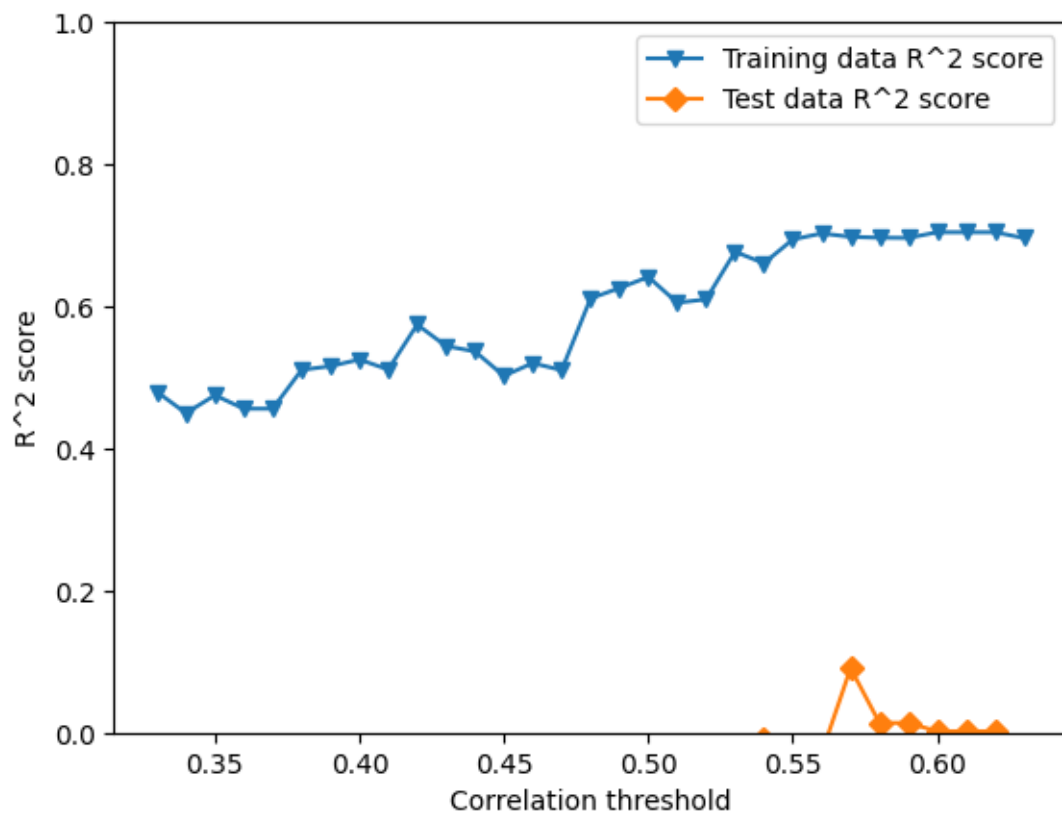

```
[37]: plt.plot(df_without_standardization['Correlation threshold'],
↳ df_without_standardization['Number of features'], label = "Number of
↳ features", marker='.')
plt.legend()
plt.xlabel('Correlation threshold')
plt.ylabel('Number of features')
plt.show()
```



[ ]:

## 5 Support Vector Machines (SVM)

```
[38]: without_standardization, train_r2_, test_r2_, hist1, hist2, target_column_name,
      ↪ training_data_RMSE, test_data_RMSE = pred_model.
      ↪ prepare_data_and_create_model(molecular_descriptors_df=data,
      ↪
      ↪         correlation_threshold=0.50,
      ↪
      ↪         standardization=False,
      ↪
      ↪         model_type='SVR',
      ↪
      ↪         kernel_ = 'linear',
      ↪
      ↪         gamma_ = 'auto',
      ↪
      ↪         target_column_name = target,
```

```

↳          random_state=random_state,
↳          train_test_split_=True,
↳          verbose=True)

```

I am not doing standardization...

|   | molecular descriptor name |  |
|---|---------------------------|--|
| 0 | AATSOZ                    |  |
| 1 | AATSOare                  |  |
| 2 | AATSOd                    |  |
| 3 | AATSOdv                   |  |
| 4 | AATSOi                    |  |

  

|   | molecular descriptor name | corr_value |
|---|---------------------------|------------|
| 0 | AATSOZ                    | 0.018677   |
| 1 | AATSOare                  | -0.341313  |
| 2 | AATSOd                    | -0.123443  |
| 3 | AATSOdv                   | -0.265670  |
| 4 | AATSOi                    | -0.428929  |

  

|   | molecular descriptor name | corr_value | absolute correlation value |
|---|---------------------------|------------|----------------------------|
| 0 | AATSOZ                    | 0.018677   | 0.018677                   |
| 1 | AATSOare                  | -0.341313  | 0.341313                   |
| 2 | AATSOd                    | -0.123443  | 0.123443                   |
| 3 | AATSOdv                   | -0.265670  | 0.265670                   |
| 4 | AATSOi                    | -0.428929  | 0.428929                   |

  

|     | molecular descriptor name | corr_value | absolute correlation value |
|-----|---------------------------|------------|----------------------------|
| 15  | AATS1i                    | -0.561620  | 0.561620                   |
| 113 | AATSC1c                   | 0.565682   | 0.565682                   |
| 125 | AATSC2c                   | -0.543393  | 0.543393                   |
| 221 | AETA_eta_R                | -0.515778  | 0.515778                   |
| 224 | AMID_C                    | 0.532458   | 0.532458                   |

  

|     | molecular descriptor name | corr_value | absolute correlation value |
|-----|---------------------------|------------|----------------------------|
| 15  | AATS1i                    | -0.561620  | 0.561620                   |
| 113 | AATSC1c                   | 0.565682   | 0.565682                   |
| 125 | AATSC2c                   | -0.543393  | 0.543393                   |
| 221 | AETA_eta_R                | -0.515778  | 0.515778                   |
| 224 | AMID_C                    | 0.532458   | 0.532458                   |

The model used is: SVR...

Return the coefficient of determination of the prediction:

-0.4496965939271831

R<sup>2</sup> score: 0.586153754648779

Correlation coefficient: 0.7656067885336303

Test data - unseen during training:

R<sup>2</sup> score: -0.4496965939271831

Correlation coefficient: nan

[7.64018302 7.85315872 5.78332399 5.95003031 6.88182489 7.33071639

```
6.08875973 8.34772883 7.06686417 7.05142133 5.48633924 6.28322853
6.90076177 6.1857832 7.30273529 7.91849526]
0      7.260428
21     6.398375
106    5.853872
68     6.080922
44     7.638272
14     7.067526
108    6.154902
62     6.455932
13     7.158641
9      5.702436
96     5.136677
49     5.619789
54     7.075721
114    6.026872
115    5.568636
87     7.288193
```

Name: LoVo/DX, dtype: float64

Training Root Mean Square Error: 0.6179284610346645

Testing Root Mean Square Error: 0.8788599052493705

```
[39]: print(target_column_name+str('_transformed'))
      print(hist1[target_column_name].hist())
```

LoVo/DX\_transformed

AxesSubplot(0.125,0.11;0.775x0.77)





```
[40]: with_standardization, train_r2_, test_r2_, hist1, hist2, target_column_name,
      ↪ training_data_RMSE, test_data_RMSE = pred_model.
      ↪ prepare_data_and_create_model(molecular_descriptors_df=data,
      ↪
      ↪         correlation_threshold=0.50,
      ↪
      ↪         standardization=True,
      ↪
      ↪         model_type='SVR',
      ↪
      ↪         kernel_ = 'linear',
      ↪
      ↪         gamma_ = 'auto',
      ↪
      ↪         target_column_name = target,
      ↪
      ↪         random_state=random_state,
      ↪
      ↪         train_test_split_=True,
      ↪
      ↪         verbose=True)
```

I am doing standardization...

molecular descriptor name

|   |          |
|---|----------|
| 0 | AATSOZ   |
| 1 | AATSOare |
| 2 | AATSOd   |
| 3 | AATSOdv  |
| 4 | AATSOi   |

|   | molecular descriptor name | corr_value |
|---|---------------------------|------------|
| 0 | AATSOZ                    | 0.018677   |
| 1 | AATSOare                  | -0.341313  |
| 2 | AATSOd                    | -0.123443  |
| 3 | AATSOdv                   | -0.265670  |
| 4 | AATSOi                    | -0.428929  |

|   | molecular descriptor name | corr_value | absolute correlation value |
|---|---------------------------|------------|----------------------------|
| 0 | AATSOZ                    | 0.018677   | 0.018677                   |
| 1 | AATSOare                  | -0.341313  | 0.341313                   |
| 2 | AATSOd                    | -0.123443  | 0.123443                   |
| 3 | AATSOdv                   | -0.265670  | 0.265670                   |
| 4 | AATSOi                    | -0.428929  | 0.428929                   |

|     | molecular descriptor name | corr_value | absolute correlation value |
|-----|---------------------------|------------|----------------------------|
| 15  | AATS1i                    | -0.561620  | 0.561620                   |
| 113 | AATSC1c                   | 0.565682   | 0.565682                   |
| 125 | AATSC2c                   | -0.543393  | 0.543393                   |
| 221 | AETA_eta_R                | -0.515778  | 0.515778                   |
| 224 | AMID_C                    | 0.532458   | 0.532458                   |

|     | molecular descriptor name | corr_value | absolute correlation value |
|-----|---------------------------|------------|----------------------------|
| 15  | AATS1i                    | -0.561620  | 0.561620                   |
| 113 | AATSC1c                   | 0.565682   | 0.565682                   |
| 125 | AATSC2c                   | -0.543393  | 0.543393                   |
| 221 | AETA_eta_R                | -0.515778  | 0.515778                   |
| 224 | AMID_C                    | 0.532458   | 0.532458                   |

The model used is: SVR...

Return the coefficient of determination of the prediction:

-0.4496965939271831

R<sup>2</sup> score: 0.586153754648779

Correlation coefficient: 0.7656067885336303

Test data - unseen during training:

R<sup>2</sup> score: -0.4496965939271831

Correlation coefficient: nan

[7.64018302 7.85315872 5.78332399 5.95003031 6.88182489 7.33071639  
6.08875973 8.34772883 7.06686417 7.05142133 5.48633924 6.28322853  
6.90076177 6.1857832 7.30273529 7.91849526]

|     |          |
|-----|----------|
| 0   | 7.260428 |
| 21  | 6.398375 |
| 106 | 5.853872 |
| 68  | 6.080922 |
| 44  | 7.638272 |
| 14  | 7.067526 |

```

108    6.154902
62    6.455932
13    7.158641
9     5.702436
96    5.136677
49    5.619789
54    7.075721
114   6.026872
115   5.568636
87    7.288193

```

Name: LoVo/DX, dtype: float64

Training Root Mean Square Error: 0.6179284610346645

Testing Root Mean Square Error: 0.8788599052493705

## 5.1 Search inside correlation space

```

[41]: step = 0.01
initial_step = corr_low
last_step = corr_high
first_list = [x / 100.0 for x in range(int(initial_step*100),
    ↪ int(last_step*100), int(step*100))]
second_list = []
third_list = []
fourth_l = []
fifth_l = []
f_list = []
for i in first_list:
    without_standardization, train_r2, test_r2, _, h_, target_column_name,
    ↪ training_data_RMSE, test_data_RMSE = pred_model.
    ↪ prepare_data_and_create_model(molecular_descriptors_df = data,

    ↪ correlation_threshold = i,

    ↪ standardization = False,

    ↪ model_type = 'SVR',

    ↪ kernel_ = 'linear',

    ↪ gamma_ = 'auto',

    ↪ target_column_name = target,

    ↪ random_state=random_state,

    ↪ train_test_split_ = True,

```

```

    verbose = False)
    second_list.append(train_r2)
    third_list.append(test_r2)
    fourth_l.append(training_data_RMSE)
    fifth_l.append(test_data_RMSE)
    f_list.append(len(h_))

```

```

[42]: df_without_standardization = pd.DataFrame(data=first_list,
    ↪ columns=["Correlation threshold"])
df_without_standardization['Training data R^2 score'] = second_list
df_without_standardization['Test data R^2 score'] = third_list
df_without_standardization['Training RMSE'] = fourth_l
df_without_standardization['Test RMSE'] = fifth_l
df_without_standardization['Number of features'] = f_list

```

```

[43]: df_svm = df_without_standardization.copy()
df_without_standardization

```

```

[43]: Correlation threshold  Training data R^2 score  Test data R^2 score  \
0          0.33          -4.576410e+06      -2.396690e+07
1          0.34          -4.819789e+06      -1.459847e+07
2          0.35          -5.239922e+06      -1.157864e+07
3          0.36          -9.918947e+05      -8.869205e+06
4          0.37          -1.825928e+06      -7.394667e+06
5          0.38          -5.229611e+05      -1.336230e+06
6          0.39          -6.852025e+05      -3.551945e+06
7          0.40          -4.263337e+05      -1.897983e+06
8          0.41          -3.609072e+05      -1.037173e+06
9          0.42          -2.462539e+04      -1.582436e+05
10         0.43          -1.053529e+04      -6.406834e+04
11         0.44          -1.161727e+04      -1.516731e+05
12         0.45          -1.151660e+04      -3.838399e+04
13         0.46          -3.945495e+03      -1.845080e+04
14         0.47          -5.015611e+03      -3.969418e+04
15         0.48          -1.992983e-01      -1.352399e+01
16         0.49          -1.050742e-01      -2.025419e+00
17         0.50           5.861538e-01      -4.496966e-01
18         0.51           5.035499e-01      -1.441652e-01
19         0.52           4.283967e-01      -8.271995e-01
20         0.53           6.363734e-01           1.174322e-01
21         0.54           6.343838e-01           2.966910e-01
22         0.55           6.132704e-01           2.045466e-01
23         0.56           5.931617e-01           1.541282e-01
24         0.57           5.813991e-01           1.130634e-01
25         0.58           5.690961e-01           6.673427e-02
26         0.59           5.666265e-01           5.261898e-02

```

|    |      |              |              |
|----|------|--------------|--------------|
| 27 | 0.60 | 5.497820e-01 | 1.336534e-02 |
| 28 | 0.61 | 5.497820e-01 | 1.336534e-02 |
| 29 | 0.62 | 5.497820e-01 | 1.336534e-02 |
| 30 | 0.63 | 5.427533e-01 | 2.935068e-02 |

|    | Training RMSE | Test RMSE   | Number of features |
|----|---------------|-------------|--------------------|
| 0  | 2054.855077   | 3573.444324 | 527                |
| 1  | 2108.787075   | 2788.911760 | 512                |
| 2  | 2198.776688   | 2483.761668 | 487                |
| 3  | 956.646939    | 2173.819475 | 455                |
| 4  | 1297.957898   | 1984.908248 | 435                |
| 5  | 694.630410    | 843.765648  | 399                |
| 6  | 795.112328    | 1375.669975 | 377                |
| 7  | 627.182608    | 1005.604789 | 343                |
| 8  | 577.054823    | 743.373185  | 290                |
| 9  | 150.736735    | 290.365886  | 245                |
| 10 | 98.596749     | 184.759265  | 203                |
| 11 | 103.535533    | 284.273773  | 143                |
| 12 | 103.086013    | 143.008482  | 111                |
| 13 | 60.342664     | 99.151768   | 94                 |
| 14 | 68.033674     | 145.428652  | 83                 |
| 15 | 1.051919      | 2.781788    | 69                 |
| 16 | 1.009751      | 1.269620    | 60                 |
| 17 | 0.617928      | 0.878860    | 50                 |
| 18 | 0.676794      | 0.780774    | 46                 |
| 19 | 0.726216      | 0.986675    | 41                 |
| 20 | 0.579224      | 0.685733    | 32                 |
| 21 | 0.580806      | 0.612145    | 25                 |
| 22 | 0.597341      | 0.651011    | 21                 |
| 23 | 0.612674      | 0.671326    | 16                 |
| 24 | 0.621468      | 0.687428    | 12                 |
| 25 | 0.630535      | 0.705154    | 9                  |
| 26 | 0.632339      | 0.710466    | 8                  |
| 27 | 0.644511      | 0.725036    | 7                  |
| 28 | 0.644511      | 0.725036    | 7                  |
| 29 | 0.644511      | 0.725036    | 7                  |
| 30 | 0.649522      | 0.719138    | 5                  |

## 5.2 Plots

```
[44]: plt.plot(df_without_standardization['Correlation threshold'],
             df_without_standardization['Training data R^2 score'], label = "Training
             data R^2 score", marker='v')
plt.plot(df_without_standardization['Correlation threshold'],
             df_without_standardization['Test data R^2
             score'], marker='D')
plt.legend()
```

```
plt.xlabel('Correlation threshold')
plt.ylabel('R^2 score')
plt.ylim([0, 1])
plt.show()
```

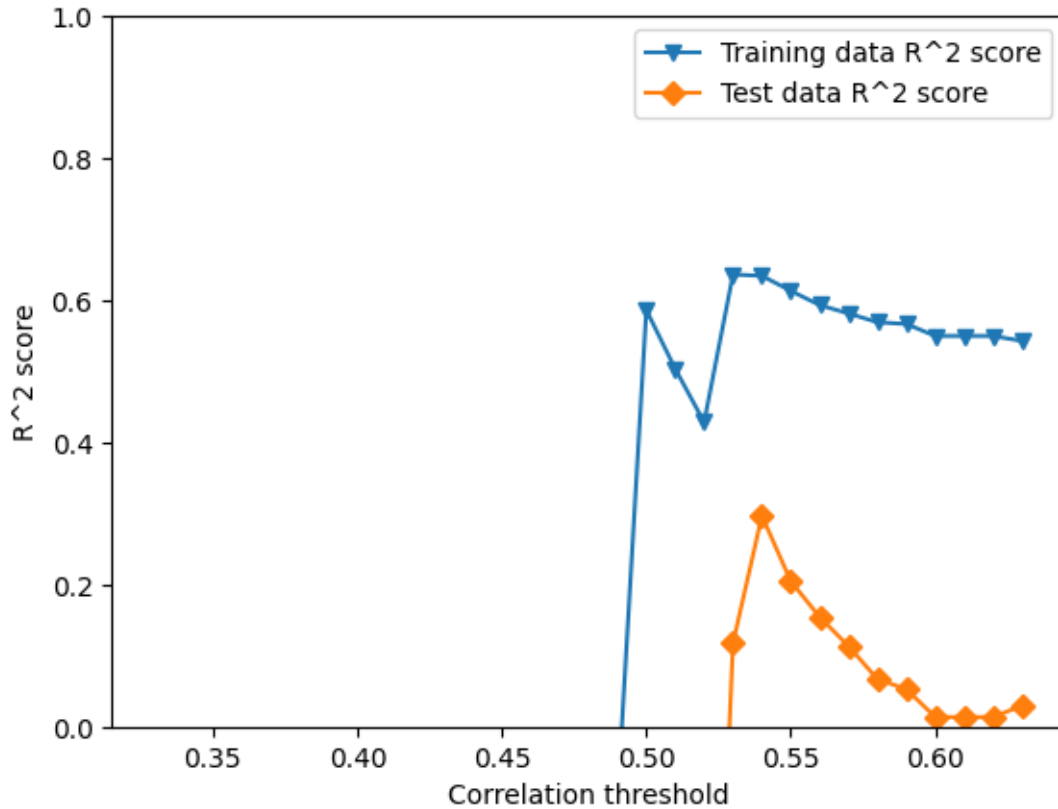

```
[45]: plt.plot(df_without_standardization['Correlation threshold'],  
              df_without_standardization['Number of features'], label = "Number of  
              features", marker='.')  
plt.legend()  
plt.xlabel('Correlation threshold')  
plt.ylabel('Number of features')  
plt.show()
```



### 5.3 Store quality measurements

```
[46]: with pd.ExcelWriter('../Data/Quality_'+ 'LoVo_DX'+ '_' +str(random_state)+'_'.
      ↪ 'xlsx') as writer:
      df_linear.to_excel(writer, sheet_name='MLR')
      df_decision_tree.to_excel(writer, sheet_name='DT')
      df_random_forest.to_excel(writer, sheet_name='RF')
      df_k_nearest.to_excel(writer, sheet_name='KNN')
      df_svm.to_excel(writer, sheet_name='SVM')
```

# Notebook

January 18, 2024

## 1 File 23

```
[1]: import sys
from pathlib import Path
prediction_mode_path = Path("../module")
sys.path.append(prediction_mode_path.as_posix())
import models_creation as pred_model

import pandas as pd
import numpy as np

from sklearn.metrics import r2_score

import matplotlib.pyplot as plt
from sklearn.tree import plot_tree

from matplotlib import pyplot as plt

import joblib

import warnings
warnings.filterwarnings('ignore')
```

```
[2]: load_prepared_data = pd.read_excel('../Data/Kolchicyna_machine_learning.xlsx')
load_prepared_data = load_prepared_data.drop(columns=['Unnamed: 0'])

target = 'LoVo/DX'

corr_low = 0.33
corr_high = 0.64

random_state = 42
```

```
[3]: load_prepared_data.head()
```

```
[3]:
```

|   | AATSOZ    | AATSOare | AATSOd   | AATSOdv  | AATSOi     | AATSOm    | AATSOp   | \ |
|---|-----------|----------|----------|----------|------------|-----------|----------|---|
| 0 | 25.090909 | 6.046518 | 3.109091 | 6.662626 | 160.775045 | 99.075564 | 1.555512 |   |
| 1 | 24.448276 | 6.008422 | 3.051724 | 6.386973 | 161.021674 | 96.473315 | 1.538471 |   |



|   |           |          |          |          |            |           |          |
|---|-----------|----------|----------|----------|------------|-----------|----------|
| 2 | 23.868852 | 5.974074 | 3.000000 | 6.138434 | 161.244045 | 94.127025 | 1.523105 |
| 3 | 23.868852 | 5.974074 | 3.032787 | 6.171220 | 161.244045 | 94.127025 | 1.523105 |
| 4 | 23.343750 | 5.942945 | 2.953125 | 5.913194 | 161.445569 | 92.000700 | 1.509180 |

|   | AATS0pe  | AATS0s   | AATS0se  | ... | A549_float | MCF-7_float | LoVo_float | \ |
|---|----------|----------|----------|-----|------------|-------------|------------|---|
| 0 | 6.126680 | 3.435416 | 7.629859 | ... | 10.8       | 10.3        | 6.5        |   |
| 1 | 6.088791 | 3.330998 | 7.596891 | ... | 11.6       | 12.0        | 8.5        |   |
| 2 | 6.054630 | 3.236850 | 7.567166 | ... | 10.9       | 12.2        | 8.8        |   |
| 3 | 6.054630 | 3.257798 | 7.567166 | ... | 10.5       | 11.3        | 8.5        |   |
| 4 | 6.023670 | 3.151529 | 7.540228 | ... | 89.5       | 92.7        | 52.8       |   |

|   | LoVo/DX_float | BALB/3T3_float | A549_float_transformed | \ |
|---|---------------|----------------|------------------------|---|
| 0 | 54.9          | 10.2           | 7.966576               |   |
| 1 | 31.1          | 14.3           | 7.935542               |   |
| 2 | 17.9          | 11.7           | 7.962574               |   |
| 3 | 10.2          | 11.0           | 7.978811               |   |
| 4 | 77.8          | 99.4           | 7.048177               |   |

|   | MCF-7_float_transformed | LoVo_float_transformed | LoVo/DX_float_transformed | \ |
|---|-------------------------|------------------------|---------------------------|---|
| 0 | 7.987163                | 8.187087               | 7.260428                  |   |
| 1 | 7.920819                | 8.070581               | 7.507240                  |   |
| 2 | 7.913640                | 8.055517               | 7.747147                  |   |
| 3 | 7.946922                | 8.070581               | 7.991400                  |   |
| 4 | 7.032920                | 7.277366               | 7.109020                  |   |

|   | BALB/3T3_float_transformed |
|---|----------------------------|
| 0 | 7.991400                   |
| 1 | 7.844664                   |
| 2 | 7.931814                   |
| 3 | 7.958607                   |
| 4 | 7.002614                   |

[5 rows x 1221 columns]

```
[4]: data = load_prepared_data[list(load_prepared_data.columns)[0:-10]]
data[target] = load_prepared_data[load_prepared_data.columns[-2]]
data.head()
```

|   | AATS0Z    | AATS0are | AATS0d   | AATS0dv  | AATS0i     | AATS0m    | AATS0p   | \ |
|---|-----------|----------|----------|----------|------------|-----------|----------|---|
| 0 | 25.090909 | 6.046518 | 3.109091 | 6.662626 | 160.775045 | 99.075564 | 1.555512 |   |
| 1 | 24.448276 | 6.008422 | 3.051724 | 6.386973 | 161.021674 | 96.473315 | 1.538471 |   |
| 2 | 23.868852 | 5.974074 | 3.000000 | 6.138434 | 161.244045 | 94.127025 | 1.523105 |   |
| 3 | 23.868852 | 5.974074 | 3.032787 | 6.171220 | 161.244045 | 94.127025 | 1.523105 |   |
| 4 | 23.343750 | 5.942945 | 2.953125 | 5.913194 | 161.445569 | 92.000700 | 1.509180 |   |

|   | AATS0pe  | AATS0s   | AATS0se  | ... | piPC10   | piPC2    | piPC3    | piPC4    | \ |
|---|----------|----------|----------|-----|----------|----------|----------|----------|---|
| 0 | 6.126680 | 3.435416 | 7.629859 | ... | 7.999655 | 4.266195 | 4.915408 | 5.516700 |   |

|   |          |          |          |     |          |          |          |          |
|---|----------|----------|----------|-----|----------|----------|----------|----------|
| 1 | 6.088791 | 3.330998 | 7.596891 | ... | 8.018726 | 4.280132 | 4.922714 | 5.520711 |
| 2 | 6.054630 | 3.236850 | 7.567166 | ... | 8.028799 | 4.293878 | 4.929967 | 5.524706 |
| 3 | 6.054630 | 3.257798 | 7.567166 | ... | 8.037440 | 4.307438 | 4.929967 | 5.524706 |
| 4 | 6.023670 | 3.151529 | 7.540228 | ... | 8.034892 | 4.307438 | 4.937168 | 5.528685 |

|   | piPC5    | piPC6    | piPC7    | piPC8    | piPC9    | LoVo/DX  |
|---|----------|----------|----------|----------|----------|----------|
| 0 | 6.098566 | 6.595759 | 6.979116 | 7.337313 | 7.681445 | 7.260428 |
| 1 | 6.103048 | 6.601209 | 6.985613 | 7.349442 | 7.695531 | 7.507240 |
| 2 | 6.105281 | 6.603923 | 6.989306 | 7.353932 | 7.704023 | 7.747147 |
| 3 | 6.107510 | 6.606629 | 6.992068 | 7.361425 | 7.709420 | 7.991400 |
| 4 | 6.107510 | 6.605277 | 6.991148 | 7.356489 | 7.707175 | 7.109020 |

[5 rows x 1212 columns]

```
[5]: print(data.shape)
data = data.dropna()
data.shape
```

(120, 1212)

[5]: (106, 1212)

## 2 Multiple Linear regression (MLR)

```
[6]: without_standardization, train_r2_, test_r2_, hist1, hist2, target_column_name,
      ↪ training_data_RMSE, test_data_RMSE = pred_model.
      ↪ prepare_data_and_create_model(molecular_descriptors_df=data,
      ↪
      ↪ correlation_threshold=0.5,
      ↪
      ↪ standardization=False,
      ↪
      ↪ model_type='linear_model',
      ↪
      ↪ target_column_name = str(target),
      ↪
      ↪ random_state=random_state,
      ↪
      ↪ train_test_split_=True,
      ↪
      ↪ verbose=True)
```

I am not doing standardization...

|   | molecular descriptor name |
|---|---------------------------|
| 0 | AATS0Z                    |
| 1 | AATS0are                  |
| 2 | AATS0d                    |

```

3          AATS0dv
4          AATS0i
molecular descriptor name  corr_value
0          AATS0Z      0.018677
1          AATS0are    -0.341313
2          AATS0d      -0.123443
3          AATS0dv     -0.265670
4          AATS0i     -0.428929
molecular descriptor name  corr_value  absolute correlation value
0          AATS0Z      0.018677      0.018677
1          AATS0are    -0.341313      0.341313
2          AATS0d      -0.123443      0.123443
3          AATS0dv     -0.265670      0.265670
4          AATS0i     -0.428929      0.428929
molecular descriptor name  corr_value  absolute correlation value
15         AATS1i      -0.561620      0.561620
113        AATSC1c      0.565682      0.565682
125        AATSC2c     -0.543393      0.543393
221        AETA_eta_R  -0.515778      0.515778
224        AMID_C      0.532458      0.532458
molecular descriptor name  corr_value  absolute correlation value
15         AATS1i      -0.561620      0.561620
113        AATSC1c      0.565682      0.565682
125        AATSC2c     -0.543393      0.543393
221        AETA_eta_R  -0.515778      0.515778
224        AMID_C      0.532458      0.532458
The model used is: LinearReg..
Return the coefficient of determination of the prediction:
-5.938065076572442
R^2 score: 0.9071734240174797
Correlation coefficient: 0.9524565208015953
Test data - unseen during training:
R^2 score: -5.938065076572442
Correlation coefficient: nan
[ 6.43590962  7.477597   7.32156869  5.37406941  5.8892975   6.23573967
  7.33433266  6.57042651  6.12174257  6.86770113  6.24010271  6.53729444
  7.90575101  7.76599362 -0.71527592  5.40247701]
114    6.026872
10     7.856985
4      7.109020
95     5.200659
111    6.853872
79     6.327902
44     7.638272
47     7.022276
107    6.000000
11     7.250264
61     5.481486

```

```

56      6.657577
0       7.260428
92      7.141463
18      6.630970
78      6.244125
Name: LoVo/DX, dtype: float64
Training Root Mean Square Error: 0.292979841686242
Testing Root Mean Square Error: 1.9015661490887223

```

```

[7]: print(target_column_name+str('_transformed'))
      print(hist1[target_column_name].hist())

```

```

LoVo/DX_transformed
AxesSubplot(0.125,0.11;0.775x0.77)

```



```

[8]: with_standardization, train_r2_, test_r2_, hist1, hist2, target_column_name,
      ↪ training_data_RMSE, test_data_RMSE = pred_model.
      ↪ prepare_data_and_create_model(molecular_descriptors_df=data,
      ↪
      ↪ correlation_threshold=0.50,
      ↪
      ↪ standardization=True,

```

```

↪      model_type='linear_model',
↪
↪      target_column_name = target,
↪
↪      random_state=random_state,
↪
↪      train_test_split_=True,
↪
↪      verbose=True)

```

I am doing standardization...

|   | molecular descriptor name |  |
|---|---------------------------|--|
| 0 | AATS0Z                    |  |
| 1 | AATS0are                  |  |
| 2 | AATS0d                    |  |
| 3 | AATS0dv                   |  |
| 4 | AATS0i                    |  |

  

|   | molecular descriptor name | corr_value |
|---|---------------------------|------------|
| 0 | AATS0Z                    | 0.018677   |
| 1 | AATS0are                  | -0.341313  |
| 2 | AATS0d                    | -0.123443  |
| 3 | AATS0dv                   | -0.265670  |
| 4 | AATS0i                    | -0.428929  |

  

|   | molecular descriptor name | corr_value | absolute correlation value |
|---|---------------------------|------------|----------------------------|
| 0 | AATS0Z                    | 0.018677   | 0.018677                   |
| 1 | AATS0are                  | -0.341313  | 0.341313                   |
| 2 | AATS0d                    | -0.123443  | 0.123443                   |
| 3 | AATS0dv                   | -0.265670  | 0.265670                   |
| 4 | AATS0i                    | -0.428929  | 0.428929                   |

  

|     | molecular descriptor name | corr_value | absolute correlation value |
|-----|---------------------------|------------|----------------------------|
| 15  | AATS1i                    | -0.561620  | 0.561620                   |
| 113 | AATSC1c                   | 0.565682   | 0.565682                   |
| 125 | AATSC2c                   | -0.543393  | 0.543393                   |
| 221 | AETA_eta_R                | -0.515778  | 0.515778                   |
| 224 | AMID_C                    | 0.532458   | 0.532458                   |

  

|     | molecular descriptor name | corr_value | absolute correlation value |
|-----|---------------------------|------------|----------------------------|
| 15  | AATS1i                    | -0.561620  | 0.561620                   |
| 113 | AATSC1c                   | 0.565682   | 0.565682                   |
| 125 | AATSC2c                   | -0.543393  | 0.543393                   |
| 221 | AETA_eta_R                | -0.515778  | 0.515778                   |
| 224 | AMID_C                    | 0.532458   | 0.532458                   |

The model used is: LinearReg...

Return the coefficient of determination of the prediction:

-5.938065076572442

R<sup>2</sup> score: 0.9071734240174797

Correlation coefficient: 0.9524565208015953

Test data - unseen during training:

R<sup>2</sup> score: -5.938065076572442

Correlation coefficient: nan

```
[ 6.43590962  7.477597    7.32156869  5.37406941  5.8892975   6.23573967
  7.33433266  6.57042651  6.12174257  6.86770113  6.24010271  6.53729444
  7.90575101  7.76599362 -0.71527592  5.40247701]
```

114 6.026872

10 7.856985

4 7.109020

95 5.200659

111 6.853872

79 6.327902

44 7.638272

47 7.022276

107 6.000000

11 7.250264

61 5.481486

56 6.657577

0 7.260428

92 7.141463

18 6.630970

78 6.244125

Name: LoVo/DX, dtype: float64

Training Root Mean Square Error: 0.292979841686242

Testing Root Mean Square Error: 1.9015661490887223

## 2.1 Search inside correlation space

```
[9]: step = 0.01
initial_step = corr_low
last_step = corr_high
first_list = [x / 100.0 for x in range(int(initial_step*100),
    ↪int(last_step*100), int(step*100))]
second_list = []
third_list = []
fourth_l = []
fifth_l = []
f_list = []
for i in first_list:
    without_standardization, train_r2, test_r2, _, h_, target_column_name,
    ↪training_data_RMSE, test_data_RMSE = pred_model.
    ↪prepare_data_and_create_model(molecular_descriptors_df = data,

    ↪correlation_threshold = i,

    ↪standardization = False,
```

```

↪         model_type = 'linear_model',
↪
↪         target_column_name = target,
↪
↪         random_state=random_state,
↪
↪         train_test_split_ = True,
↪
↪         verbose = False)
second_list.append(train_r2)
third_list.append(test_r2)
fourth_l.append(training_data_RMSE)
fifth_l.append(test_data_RMSE)
f_list.append(len(h_))

```

```

[10]: df_without_standardization = pd.DataFrame(data=first_list,
↪       columns=["Correlation threshold"])
df_without_standardization['Training data R^2 score'] = second_list
df_without_standardization['Test data R^2 score'] = third_list
df_without_standardization['Training RMSE'] = fourth_l
df_without_standardization['Test RMSE'] = fifth_l
df_without_standardization['Number of features'] = f_list

```

```

[11]: df_linear = df_without_standardization.copy()
df_without_standardization

```

```

[11]:
Correlation threshold  Training data R^2 score  Test data R^2 score \
0                    0.33                0.999529        -25.366214
1                    0.34                0.999529       -118.874703
2                    0.35                0.999529        -88.944337
3                    0.36                0.999529       -133.757490
4                    0.37                0.999529       -152.149817
5                    0.38                0.999529       -134.333640
6                    0.39                0.999529       -149.104334
7                    0.40                0.999529       -684.758130
8                    0.41                0.999529       -692.818706
9                    0.42                0.999529        -70.002815
10                   0.43                0.999529        -39.013138
11                   0.44                0.999529       -104.132516
12                   0.45                0.999529        -17.907666
13                   0.46                0.999529      -8126.913150
14                   0.47                0.990640         -5.805265
15                   0.48                0.973257         -3.025601
16                   0.49                0.956264         -7.382606
17                   0.50                0.907173         -5.938065
18                   0.51                0.902360         -4.308421

```

|    |      |          |           |
|----|------|----------|-----------|
| 19 | 0.52 | 0.897049 | -2.564160 |
| 20 | 0.53 | 0.878136 | -4.509620 |
| 21 | 0.54 | 0.806169 | -0.191509 |
| 22 | 0.55 | 0.775066 | 0.161569  |
| 23 | 0.56 | 0.764378 | 0.393203  |
| 24 | 0.57 | 0.706754 | 0.503572  |
| 25 | 0.58 | 0.680843 | 0.585644  |
| 26 | 0.59 | 0.679485 | 0.577302  |
| 27 | 0.60 | 0.677151 | 0.568799  |
| 28 | 0.61 | 0.677151 | 0.568799  |
| 29 | 0.62 | 0.677151 | 0.568799  |
| 30 | 0.63 | 0.516627 | 0.527256  |

|    | Training RMSE | Test RMSE | Number of features |
|----|---------------|-----------|--------------------|
| 0  | 0.020869      | 3.706945  | 527                |
| 1  | 0.020869      | 7.904166  | 512                |
| 2  | 0.020869      | 6.846666  | 487                |
| 3  | 0.020869      | 8.380476  | 455                |
| 4  | 0.020869      | 8.934094  | 435                |
| 5  | 0.020869      | 8.398373  | 399                |
| 6  | 0.020869      | 8.844817  | 377                |
| 7  | 0.020869      | 18.905046 | 343                |
| 8  | 0.020869      | 19.015829 | 290                |
| 9  | 0.020869      | 6.083171  | 245                |
| 10 | 0.020869      | 4.566606  | 203                |
| 11 | 0.020869      | 7.402199  | 143                |
| 12 | 0.020869      | 3.139144  | 111                |
| 13 | 0.020869      | 65.085131 | 94                 |
| 14 | 0.093034      | 1.883280  | 83                 |
| 15 | 0.157256      | 1.448464  | 69                 |
| 16 | 0.201104      | 2.090171  | 60                 |
| 17 | 0.292980      | 1.901566  | 50                 |
| 18 | 0.300480      | 1.663317  | 46                 |
| 19 | 0.308544      | 1.362922  | 41                 |
| 20 | 0.335691      | 1.694545  | 32                 |
| 21 | 0.423363      | 0.788027  | 25                 |
| 22 | 0.456067      | 0.661037  | 21                 |
| 23 | 0.466777      | 0.562360  | 16                 |
| 24 | 0.520736      | 0.508652  | 12                 |
| 25 | 0.543255      | 0.464707  | 9                  |
| 26 | 0.544409      | 0.469362  | 8                  |
| 27 | 0.546388      | 0.474058  | 7                  |
| 28 | 0.546388      | 0.474058  | 7                  |
| 29 | 0.546388      | 0.474058  | 7                  |
| 30 | 0.668564      | 0.496370  | 5                  |

[ ]:



## 2.2 Plots

```
[12]: plt.plot(df_without_standardization['Correlation threshold'],  
             df_without_standardization['Training data R^2 score'], label = "Training_  
             data R^2 score", marker='v')  
plt.plot(df_without_standardization['Correlation threshold'],  
         df_without_standardization['Test data R^2 score'], label = "Test data R^2_  
         score", marker='D')  
plt.legend()  
plt.xlabel('Correlation threshold')  
plt.ylabel('R^2 score')  
plt.ylim([0, 1])  
plt.show()
```

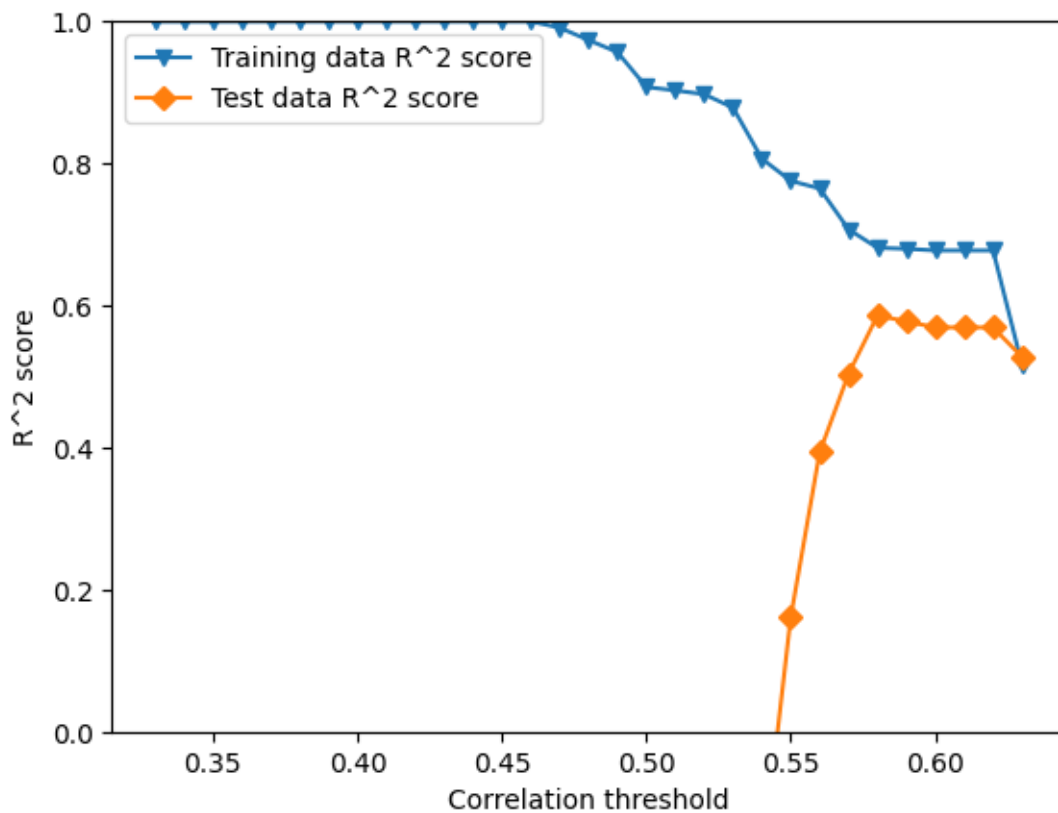

```
[13]: plt.plot(df_without_standardization['Correlation threshold'],  
             df_without_standardization['Number of features'], label = "Number of_  
             features", marker='.')  
plt.legend()  
plt.xlabel('Correlation threshold')  
plt.ylabel('Number of features')  
plt.show()
```



[ ]:

## 2.3 Decision Tree

```
[14]: without_standardization, train_r2_, test_r2_, hist1, hist2, target_column_name,
      ↪ training_data_RMSE, test_data_RMSE = pred_model.
      ↪ prepare_data_and_create_model(molecular_descriptors_df=data,
      ↪
      ↪         correlation_threshold=0.50,
      ↪
      ↪         standardization=False,
      ↪
      ↪         model_type='DecisionTreeRegressor',
      ↪
      ↪         max_depth=5,
      ↪
      ↪         target_column_name = target,
      ↪
      ↪         random_state=random_state,
```

```

↪          train_test_split_=True,
↪          verbose=True)

```

I am not doing standardization...

|     | molecular descriptor name |            |                            |
|-----|---------------------------|------------|----------------------------|
| 0   | AATS0Z                    |            |                            |
| 1   | AATS0are                  |            |                            |
| 2   | AATS0d                    |            |                            |
| 3   | AATS0dv                   |            |                            |
| 4   | AATS0i                    |            |                            |
|     | molecular descriptor name | corr_value |                            |
| 0   | AATS0Z                    | 0.018677   |                            |
| 1   | AATS0are                  | -0.341313  |                            |
| 2   | AATS0d                    | -0.123443  |                            |
| 3   | AATS0dv                   | -0.265670  |                            |
| 4   | AATS0i                    | -0.428929  |                            |
|     | molecular descriptor name | corr_value | absolute correlation value |
| 0   | AATS0Z                    | 0.018677   | 0.018677                   |
| 1   | AATS0are                  | -0.341313  | 0.341313                   |
| 2   | AATS0d                    | -0.123443  | 0.123443                   |
| 3   | AATS0dv                   | -0.265670  | 0.265670                   |
| 4   | AATS0i                    | -0.428929  | 0.428929                   |
|     | molecular descriptor name | corr_value | absolute correlation value |
| 15  | AATS1i                    | -0.561620  | 0.561620                   |
| 113 | AATSC1c                   | 0.565682   | 0.565682                   |
| 125 | AATSC2c                   | -0.543393  | 0.543393                   |
| 221 | AETA_eta_R                | -0.515778  | 0.515778                   |
| 224 | AMID_C                    | 0.532458   | 0.532458                   |
|     | molecular descriptor name | corr_value | absolute correlation value |
| 15  | AATS1i                    | -0.561620  | 0.561620                   |
| 113 | AATSC1c                   | 0.565682   | 0.565682                   |
| 125 | AATSC2c                   | -0.543393  | 0.543393                   |
| 221 | AETA_eta_R                | -0.515778  | 0.515778                   |
| 224 | AMID_C                    | 0.532458   | 0.532458                   |

The model used is: DecisionTree...

Return the coefficient of determination of the prediction:

0.33684316448779406

R<sup>2</sup> score: 0.9184499075482622

Correlation coefficient: 0.9583579224633467

Test data - unseen during training:

R<sup>2</sup> score: 0.33684316448779406

Correlation coefficient: 0.5803819126125435

[5.85304018 7.27468871 7.56156648 5.85304018 6.92324501 5.85304018  
 7.17422529 8.78271555 5.85304018 7.27468871 5.85304018 6.24964472  
 7.56156648 7.11308338 7.27468871 5.85304018]

114 6.026872

```

10    7.856985
4     7.109020
95    5.200659
111   6.853872
79    6.327902
44    7.638272
47    7.022276
107   6.000000
11    7.250264
61    5.481486
56    6.657577
0     7.260428
92    7.141463
18    6.630970
78    6.244125

```

Name: LoVo/DX, dtype: float64

Training Root Mean Square Error: 0.2746083908132104

Testing Root Mean Square Error: 0.5878958281921561

```

[15]: print(target_column_name+str('_transformed'))
      print(hist1[target_column_name].hist())

```

LoVo/DX\_transformed

AxesSubplot(0.125,0.11;0.775x0.77)



```
[16]: with_standardization, train_r2_, test_r2_, hist1, hist2, target_column_name,
      ↪ training_data_RMSE, test_data_RMSE = pred_model.
      ↪ prepare_data_and_create_model(molecular_descriptors_df=data,
      ↪
      ↪         correlation_threshold=0.50,
      ↪
      ↪         standardization=True,
      ↪
      ↪         model_type='DecisionTreeRegressor',
      ↪
      ↪         max_depth=5,
      ↪
      ↪         target_column_name = target,
      ↪
      ↪         random_state=random_state,
      ↪
      ↪         train_test_split_=True,
      ↪
      ↪         verbose=True)
```

I am doing standardization...

|   | molecular descriptor name |  |
|---|---------------------------|--|
| 0 | AATSOZ                    |  |
| 1 | AATSOare                  |  |
| 2 | AATSOd                    |  |
| 3 | AATSOdv                   |  |
| 4 | AATSOi                    |  |

  

|   | molecular descriptor name | corr_value |
|---|---------------------------|------------|
| 0 | AATSOZ                    | 0.018677   |
| 1 | AATSOare                  | -0.341313  |
| 2 | AATSOd                    | -0.123443  |
| 3 | AATSOdv                   | -0.265670  |
| 4 | AATSOi                    | -0.428929  |

  

|   | molecular descriptor name | corr_value | absolute correlation value |
|---|---------------------------|------------|----------------------------|
| 0 | AATSOZ                    | 0.018677   | 0.018677                   |
| 1 | AATSOare                  | -0.341313  | 0.341313                   |
| 2 | AATSOd                    | -0.123443  | 0.123443                   |
| 3 | AATSOdv                   | -0.265670  | 0.265670                   |
| 4 | AATSOi                    | -0.428929  | 0.428929                   |

  

|     | molecular descriptor name | corr_value | absolute correlation value |
|-----|---------------------------|------------|----------------------------|
| 15  | AATS1i                    | -0.561620  | 0.561620                   |
| 113 | AATSC1c                   | 0.565682   | 0.565682                   |
| 125 | AATSC2c                   | -0.543393  | 0.543393                   |
| 221 | AETA_eta_R                | -0.515778  | 0.515778                   |
| 224 | AMID_C                    | 0.532458   | 0.532458                   |

|     | molecular descriptor name | corr_value | absolute correlation value |
|-----|---------------------------|------------|----------------------------|
| 15  | AATS1i                    | -0.561620  | 0.561620                   |
| 113 | AATSC1c                   | 0.565682   | 0.565682                   |
| 125 | AATSC2c                   | -0.543393  | 0.543393                   |
| 221 | AETA_eta_R                | -0.515778  | 0.515778                   |
| 224 | AMID_C                    | 0.532458   | 0.532458                   |

The model used is: DecisionTree...

Return the coefficient of determination of the prediction:

0.33684316448779406

R<sup>2</sup> score: 0.9184499075482622

Correlation coefficient: 0.9583579224633467

Test data - unseen during training:

R<sup>2</sup> score: 0.33684316448779406

Correlation coefficient: 0.5803819126125435

[5.85304018 7.27468871 7.56156648 5.85304018 6.92324501 5.85304018

7.17422529 8.78271555 5.85304018 7.27468871 5.85304018 6.24964472

7.56156648 7.11308338 7.27468871 5.85304018]

114 6.026872

10 7.856985

4 7.109020

95 5.200659

111 6.853872

79 6.327902

44 7.638272

47 7.022276

107 6.000000

11 7.250264

61 5.481486

56 6.657577

0 7.260428

92 7.141463

18 6.630970

78 6.244125

Name: LoVo/DX, dtype: float64

Training Root Mean Square Error: 0.2746083908132104

Testing Root Mean Square Error: 0.5878958281921561

## 2.4 Search inside correlation space

```
[17]: step = 0.01
initial_step = corr_low
last_step = corr_high
first_list = [x / 100.0 for x in range(int(initial_step*100),
    ↪int(last_step*100), int(step*100))]
max_depth = [range(2, 30, 1)]
corr_th = []
second_list = []
```

```

third_list = []
fourth_l = []
fifth_l = []
f_list = []
fif_list = []
for i in first_list:
    for depth in max_depth[0]:

        without_standardization, train_r2, test_r2, _, h_, target_column_name,
        ↪ training_data_RMSE, test_data_RMSE = pred_model.
        ↪ prepare_data_and_create_model(molecular_descriptors_df=data,

        ↪ correlation_threshold=i,

        ↪ standardization=False,

        ↪ model_type='DecisionTreeRegressor',

        ↪ max_depth=depth,

        ↪ target_column_name = target,

        ↪ random_state=random_state,

        ↪ train_test_split_=True,

        ↪ verbose=False)
        corr_th.append(i)
        second_list.append(train_r2)
        third_list.append(test_r2)
        fourth_l.append(training_data_RMSE)
        fifth_l.append(test_data_RMSE)
        f_list.append(len(h_))
        fif_list.append(depth)

```

```

[18]: df_without_standardization = pd.DataFrame(data=corr_th, columns=["Correlation_
        ↪ threshold"])
df_without_standardization['Training data R^2 score'] = second_list
df_without_standardization['Test data R^2 score'] = third_list
df_without_standardization['Training RMSE'] = fourth_l
df_without_standardization['Test RMSE'] = fifth_l
df_without_standardization['Number of features'] = f_list
df_without_standardization['Depth number'] = fif_list

```

```

[19]: df_decision_tree = df_without_standardization.copy()

```

```
#df_without_standardization.to_excel('../Data/
↳A549_Decision_tree_rs_'+str(random_state)+'.xlsx')
```

## 2.5 Plots

```
[20]: corre_list = [x / 100.0 for x in range(int(initial_step*100),
↳int(last_step*100), int(0.01*100))]
for element in corre_list:
    element_ =
    ↳df_without_standardization[df_without_standardization['Correlation_
    ↳threshold'] == float(element)]
    plt.plot(element_['Depth number'], element_['Training data R^2 score'],
    ↳label = "Training data R^2 score", marker='v')
    plt.plot(element_['Depth number'], element_['Test data R^2 score'], label =
    ↳"Test data R^2 score", marker='D')
    plt.legend()
    plt.xlabel('Depth number -> correlation threshold: '+str(element)+'\n
    ↳Number of features: '+str(element_['Number of features'].iloc[0]),
    ↳fontweight='bold')
    plt.xlim(max(element_['Depth number'])+1, min(element_['Depth number'])-1)
    plt.ylabel('R^2 score')
    plt.ylim([0, 1])
    plt.rc('grid', linestyle="-. ", color='black')
    plt.grid(True)
    plt.show()
```



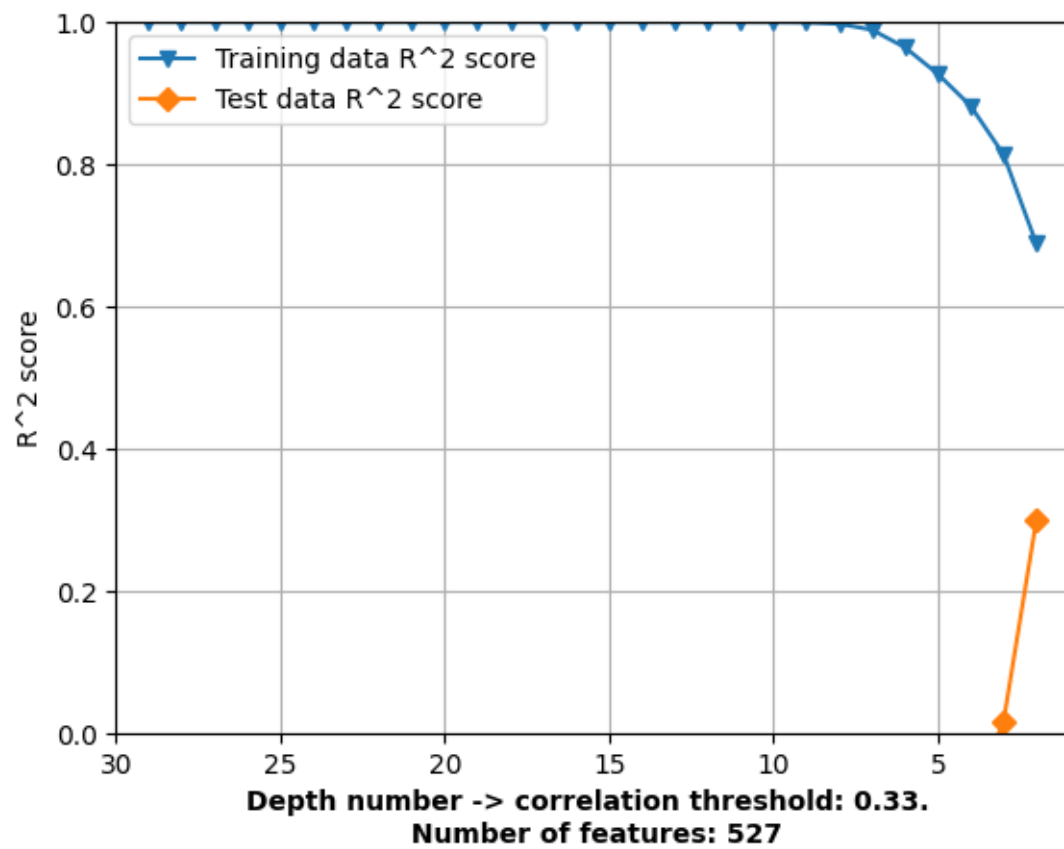

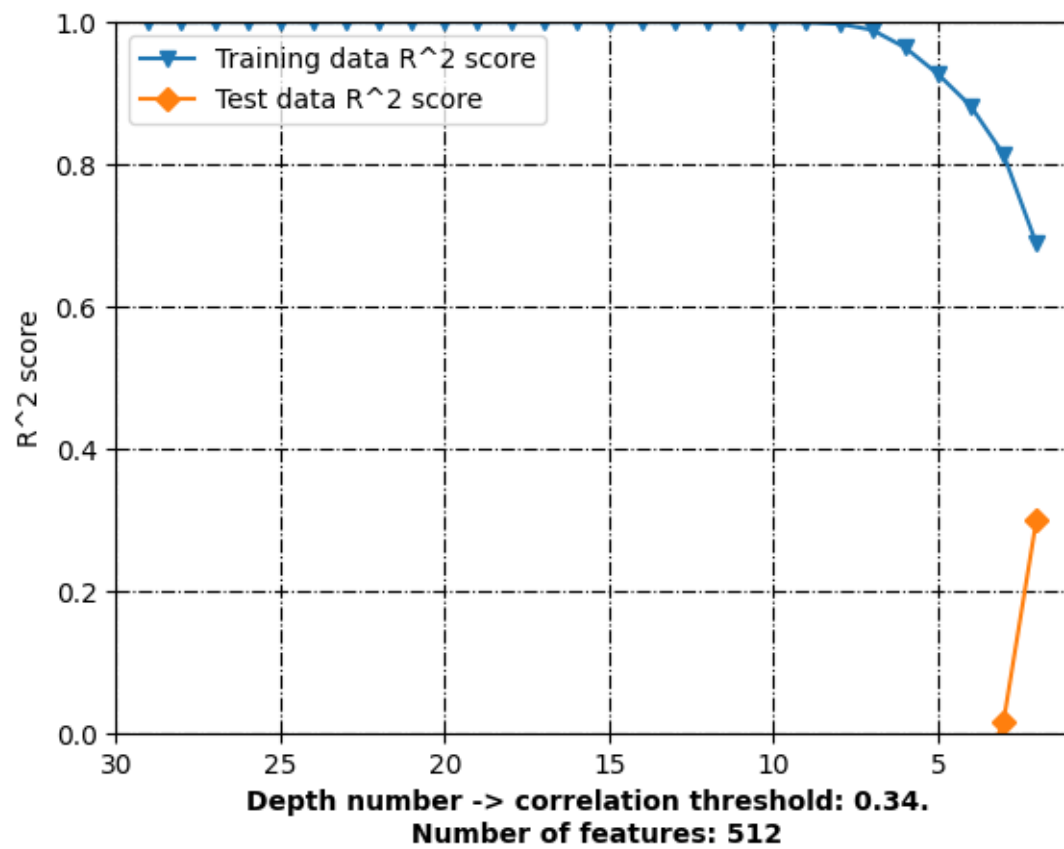

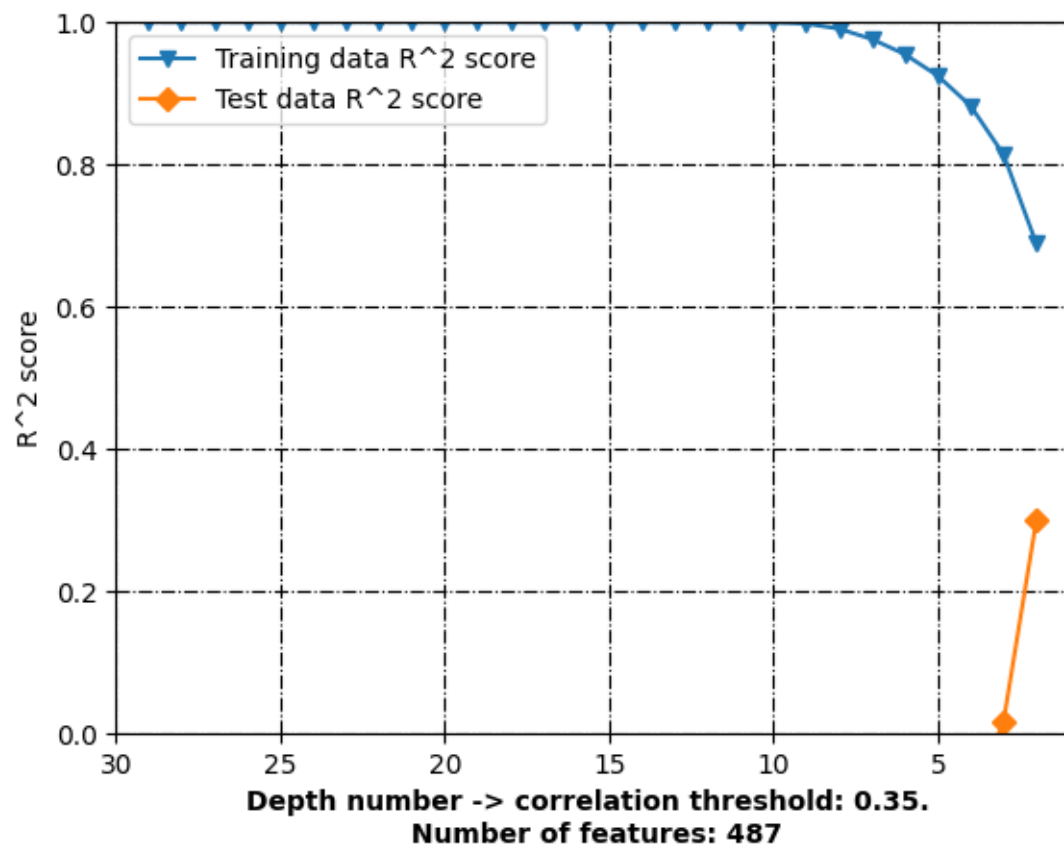

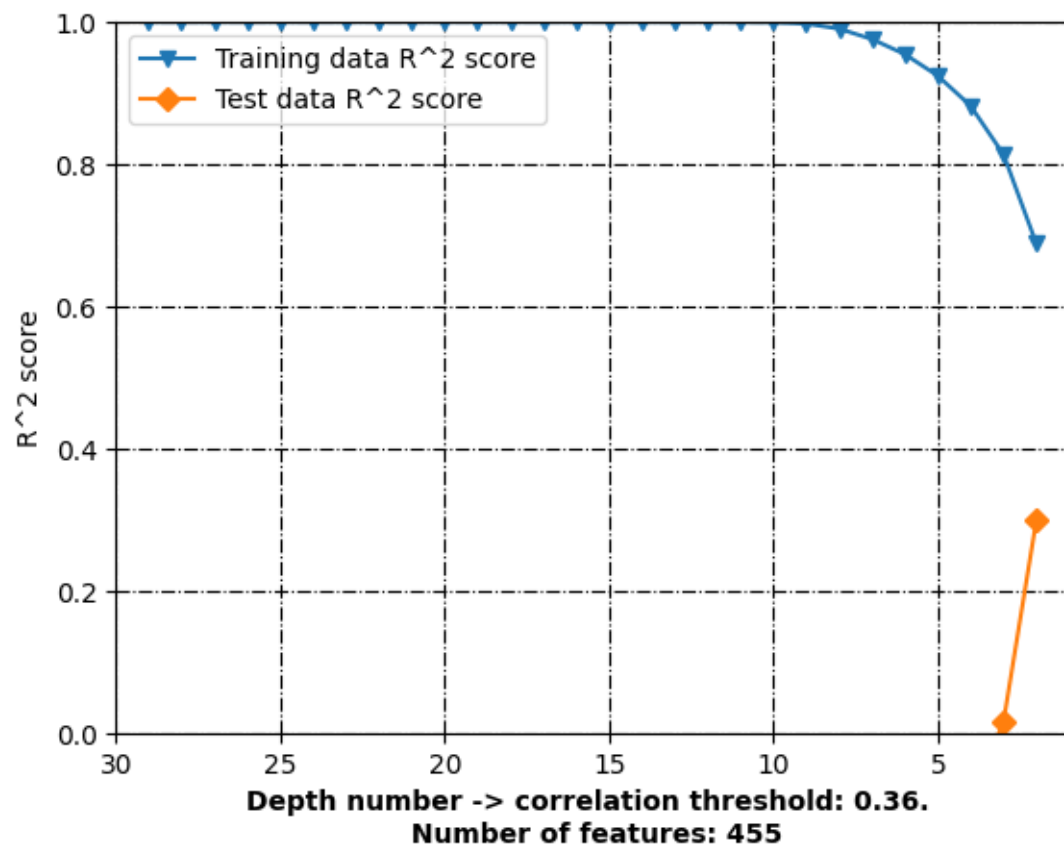

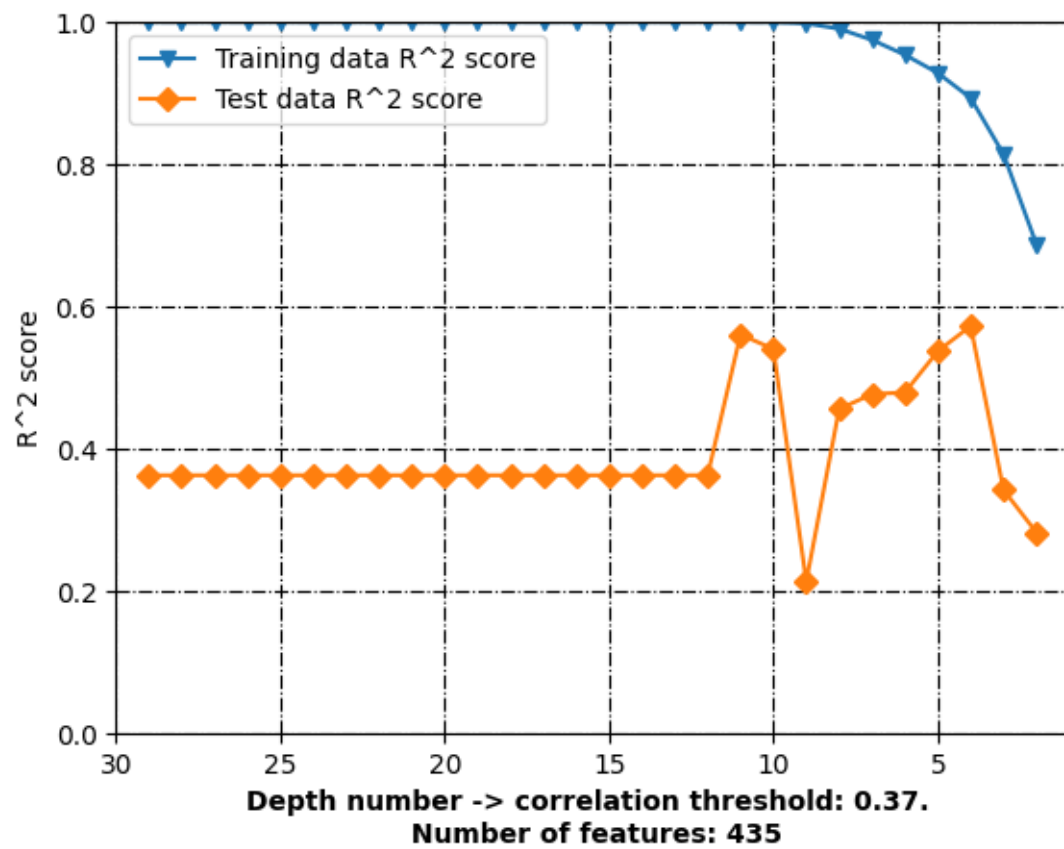

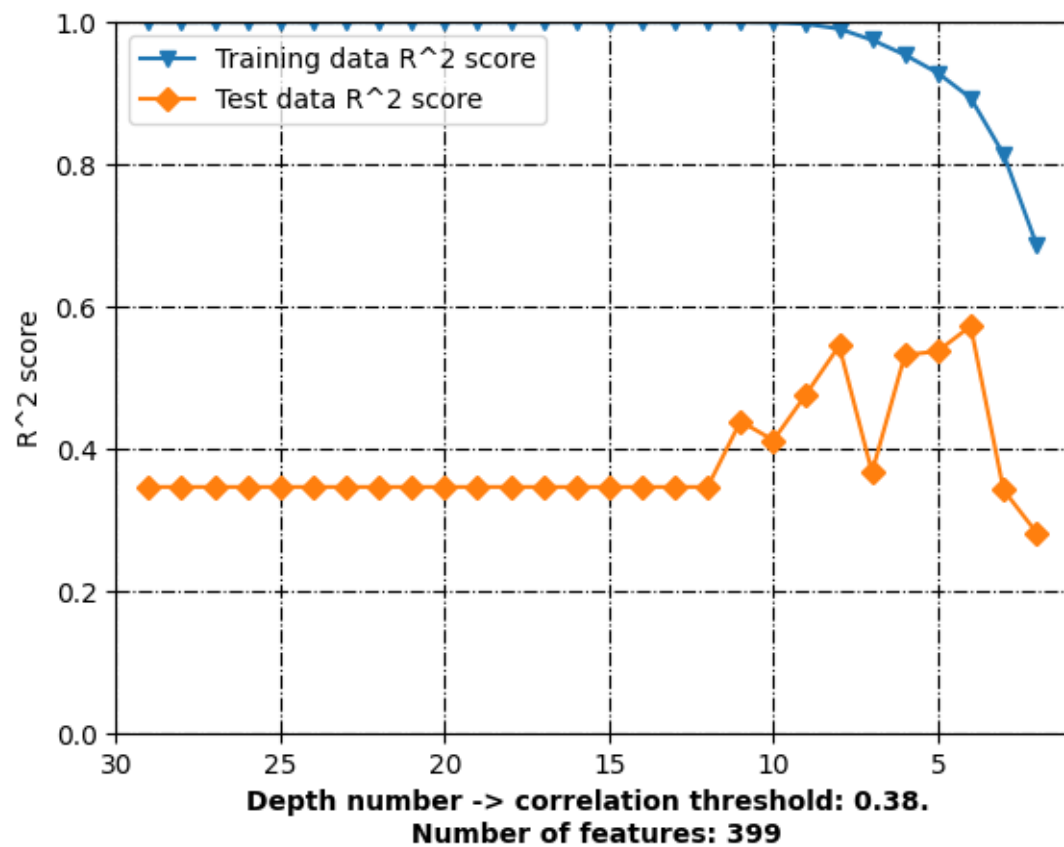

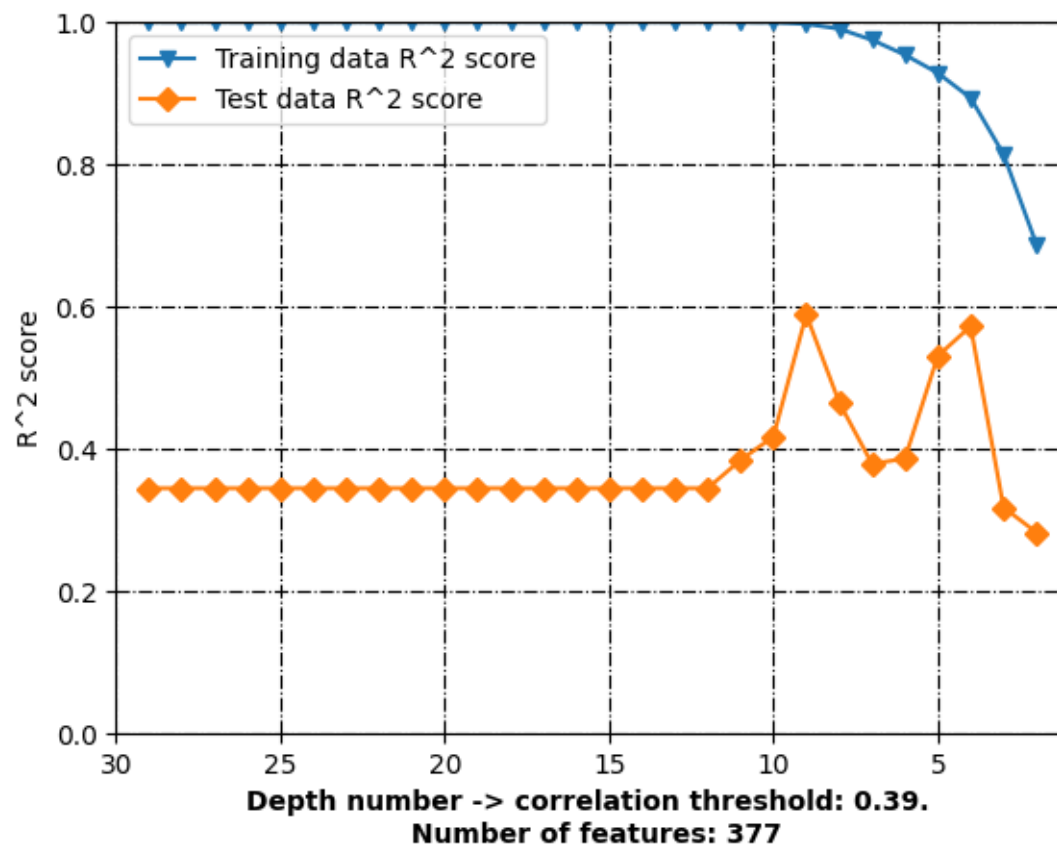

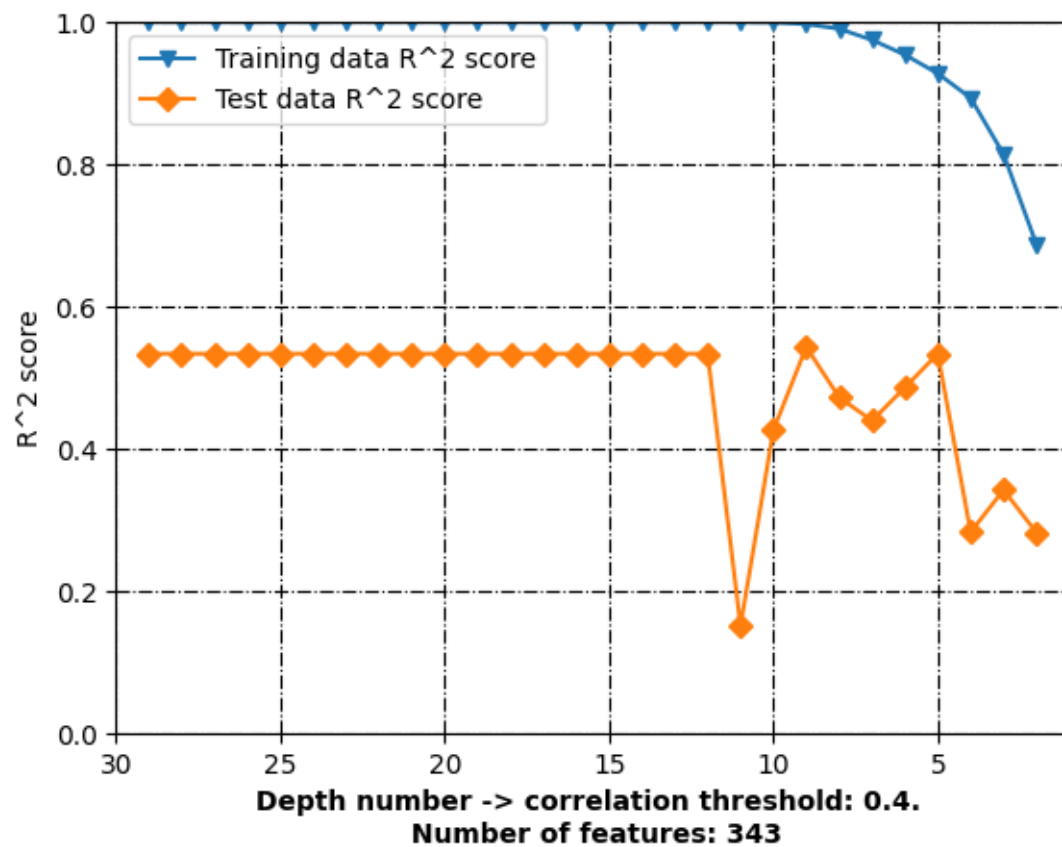



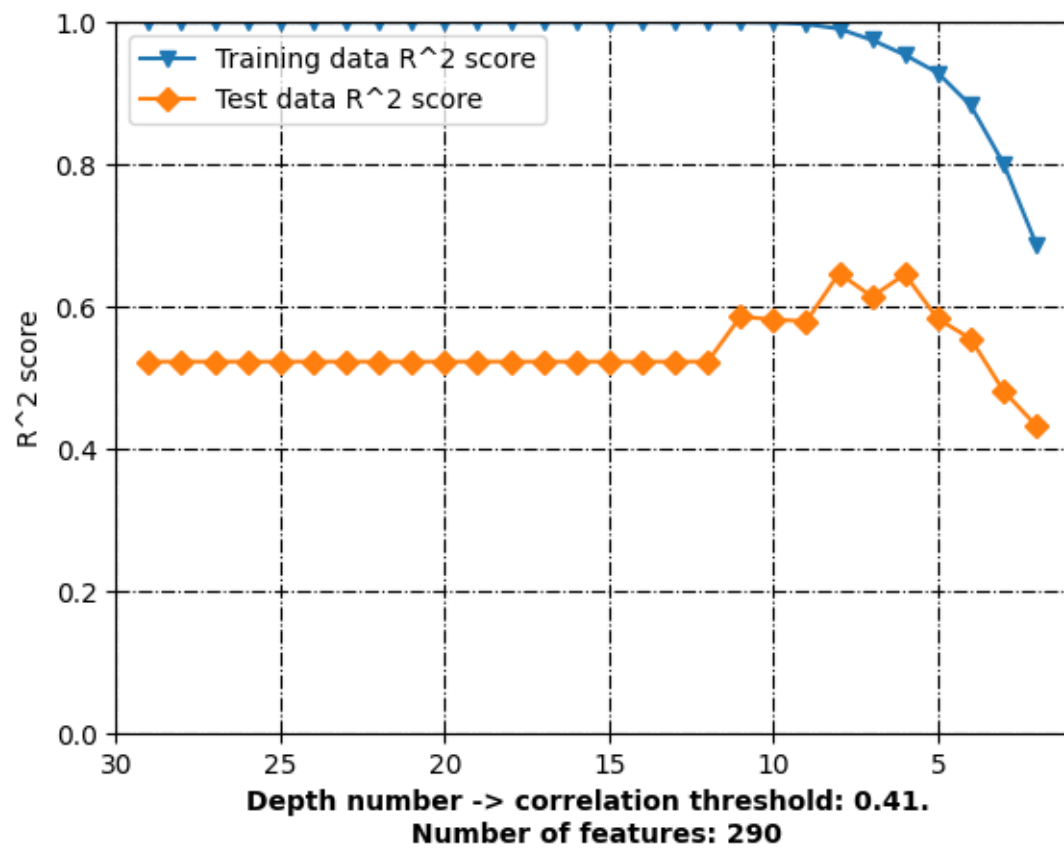

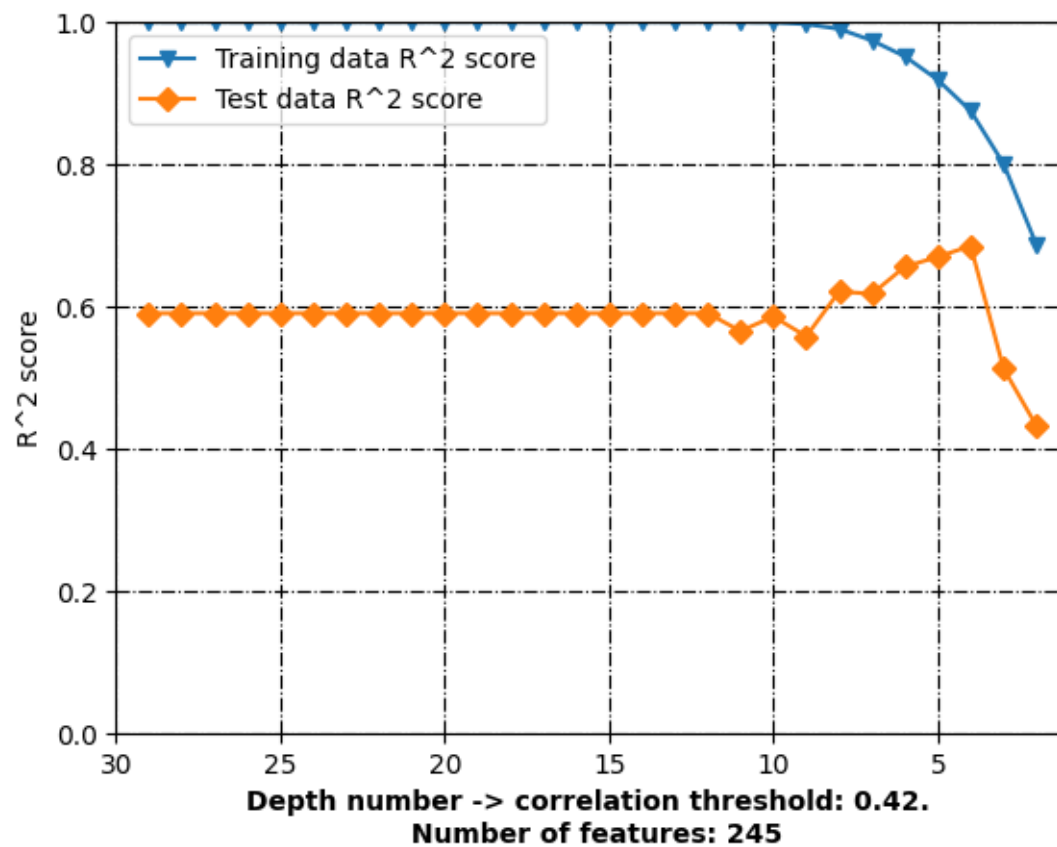

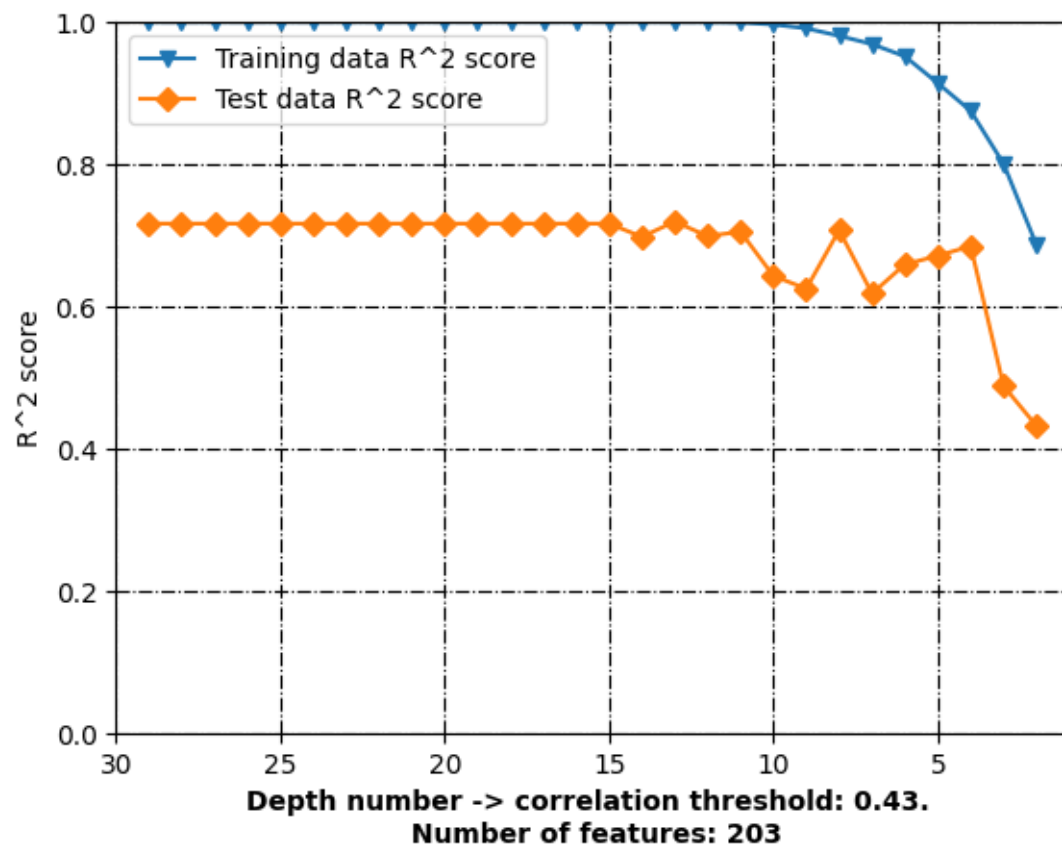

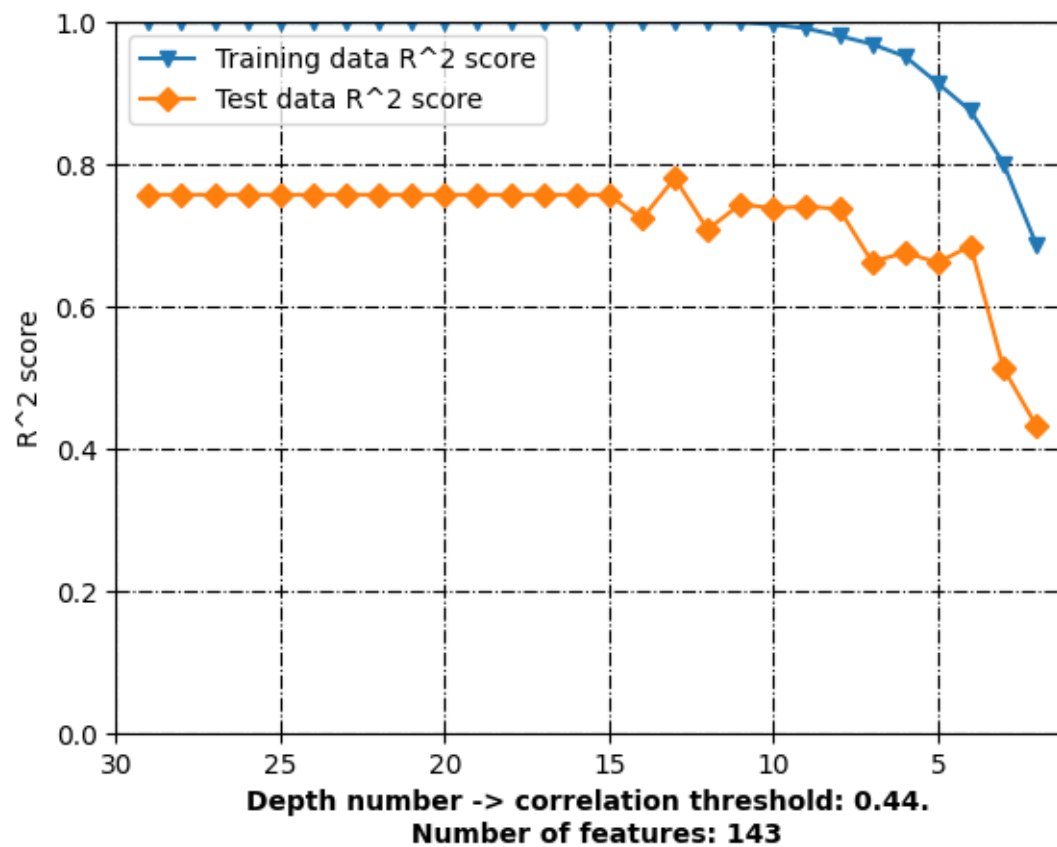

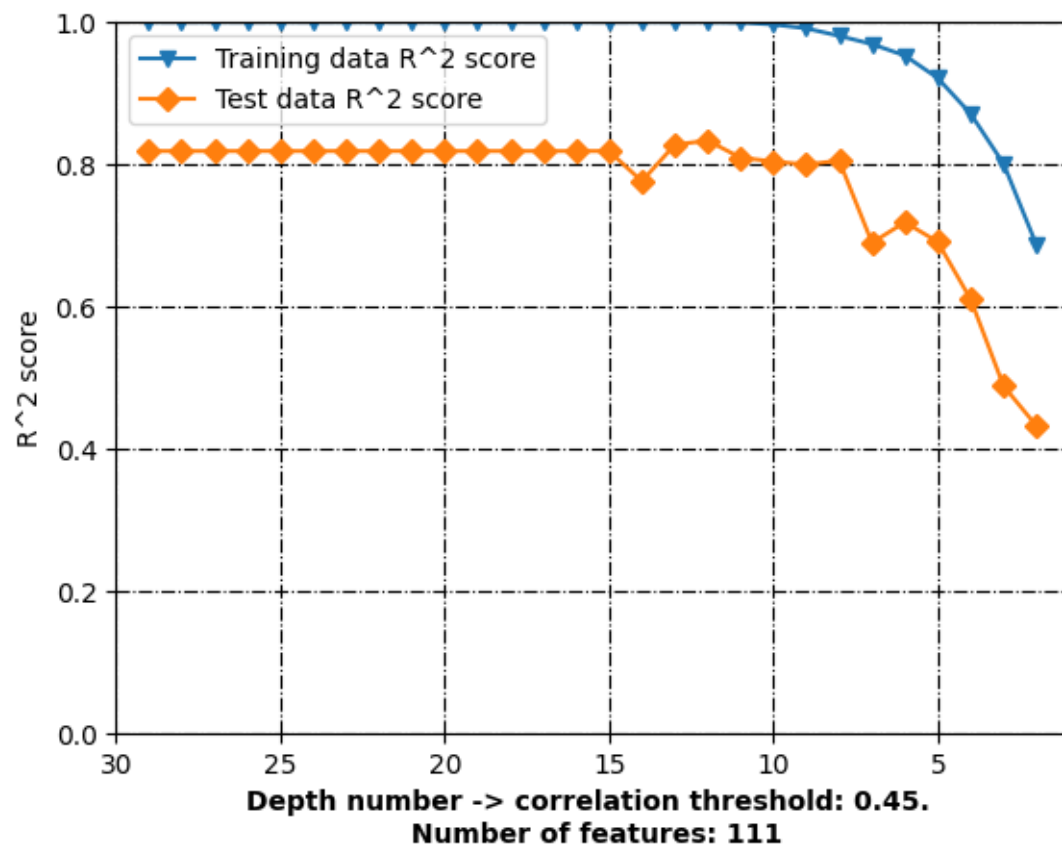

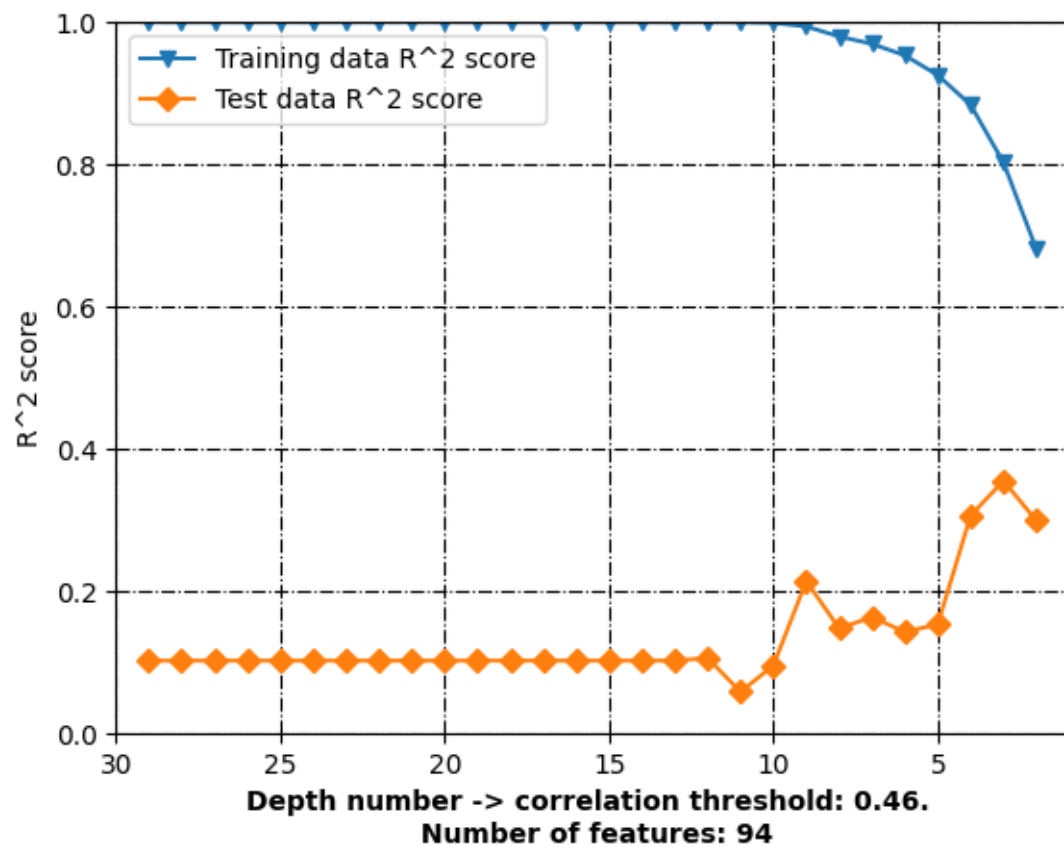

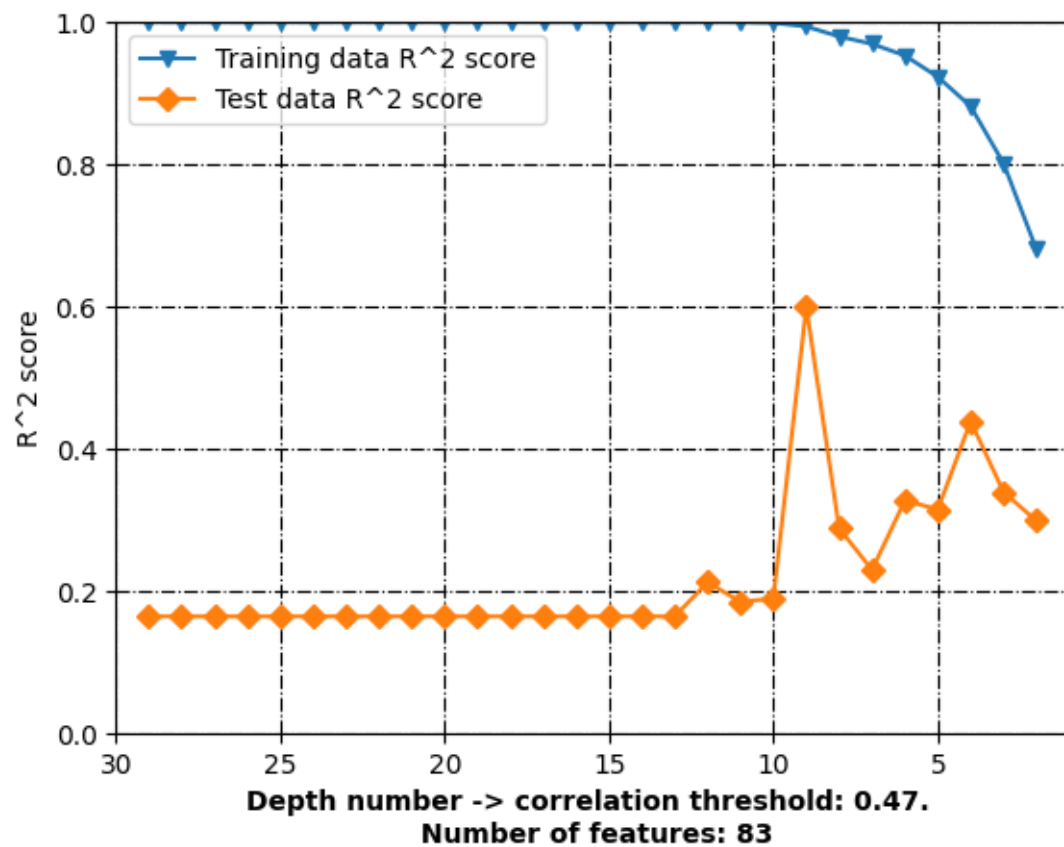

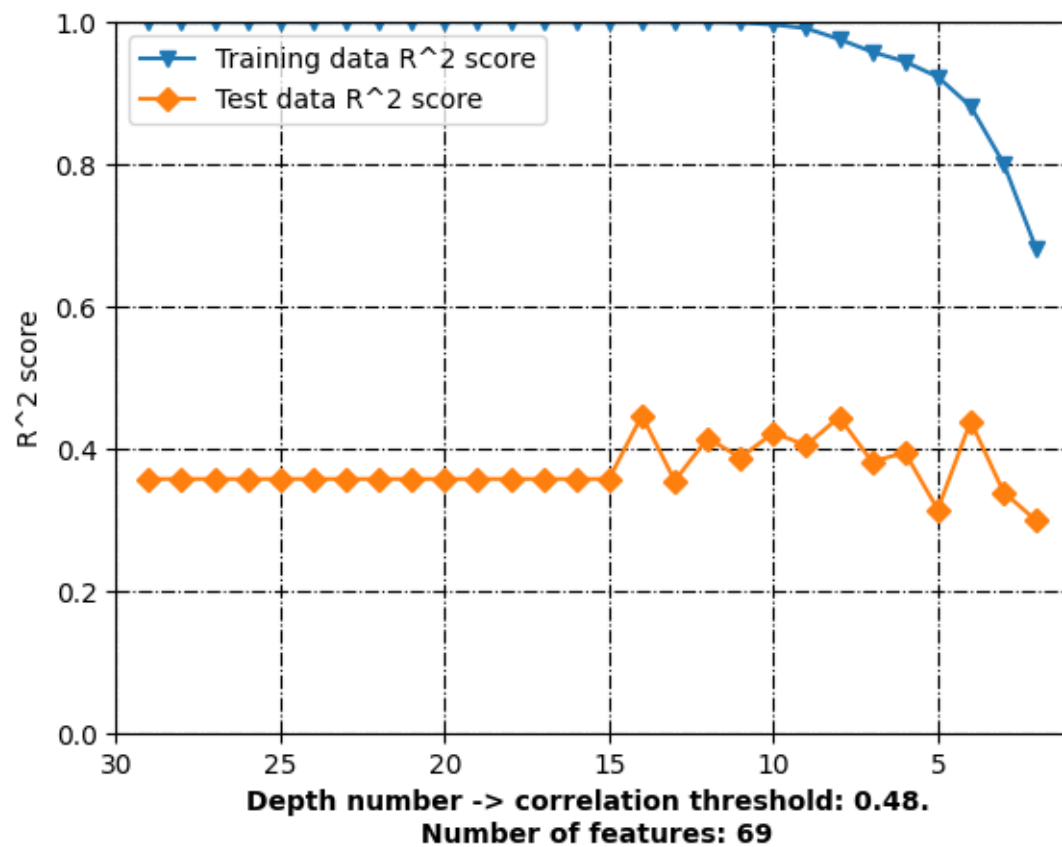



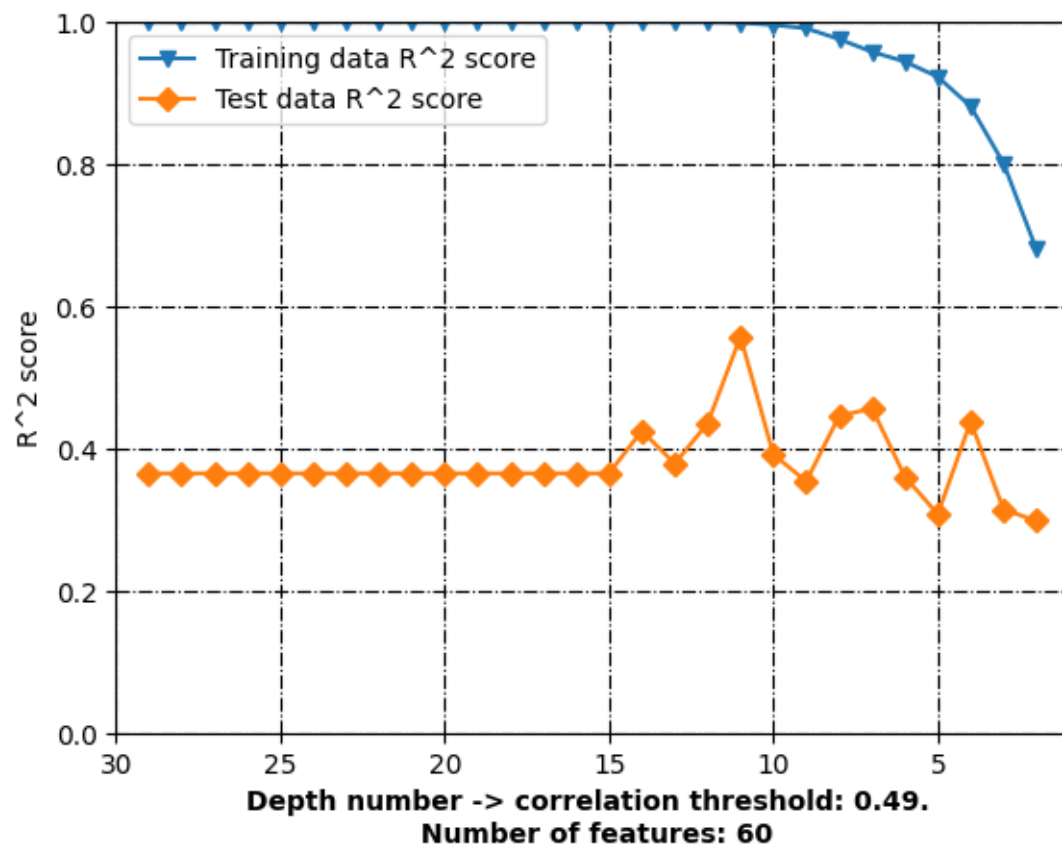

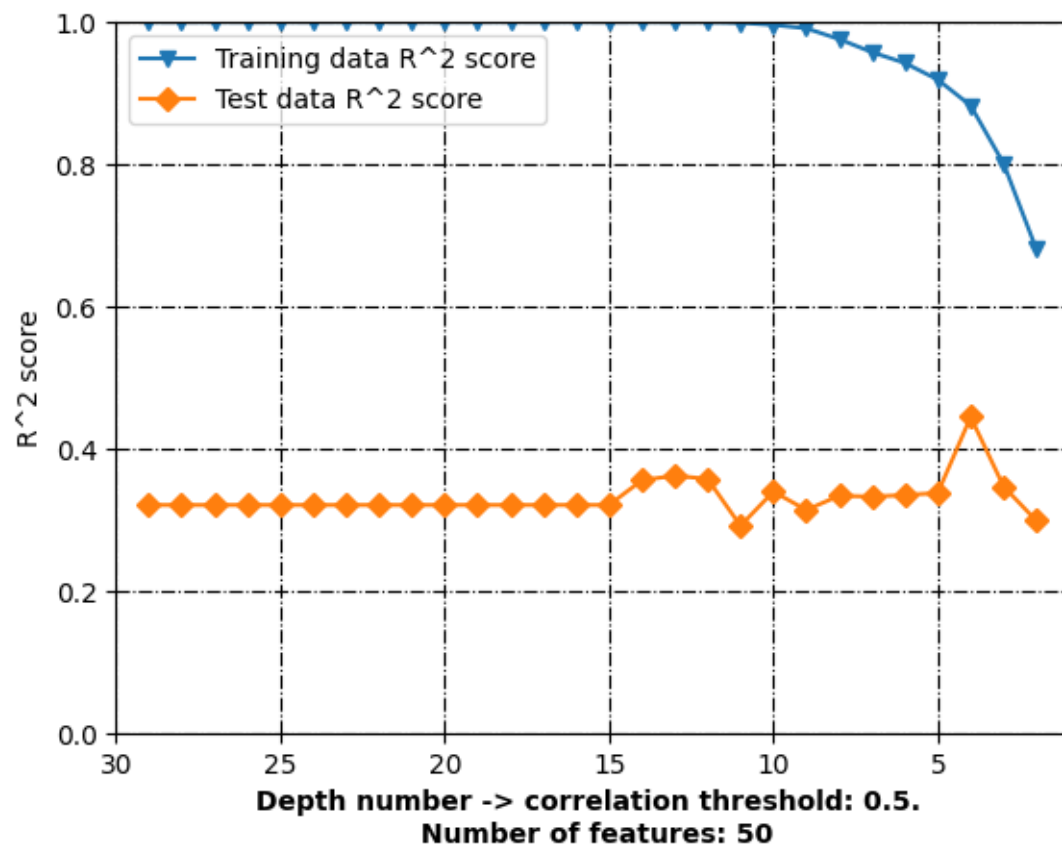

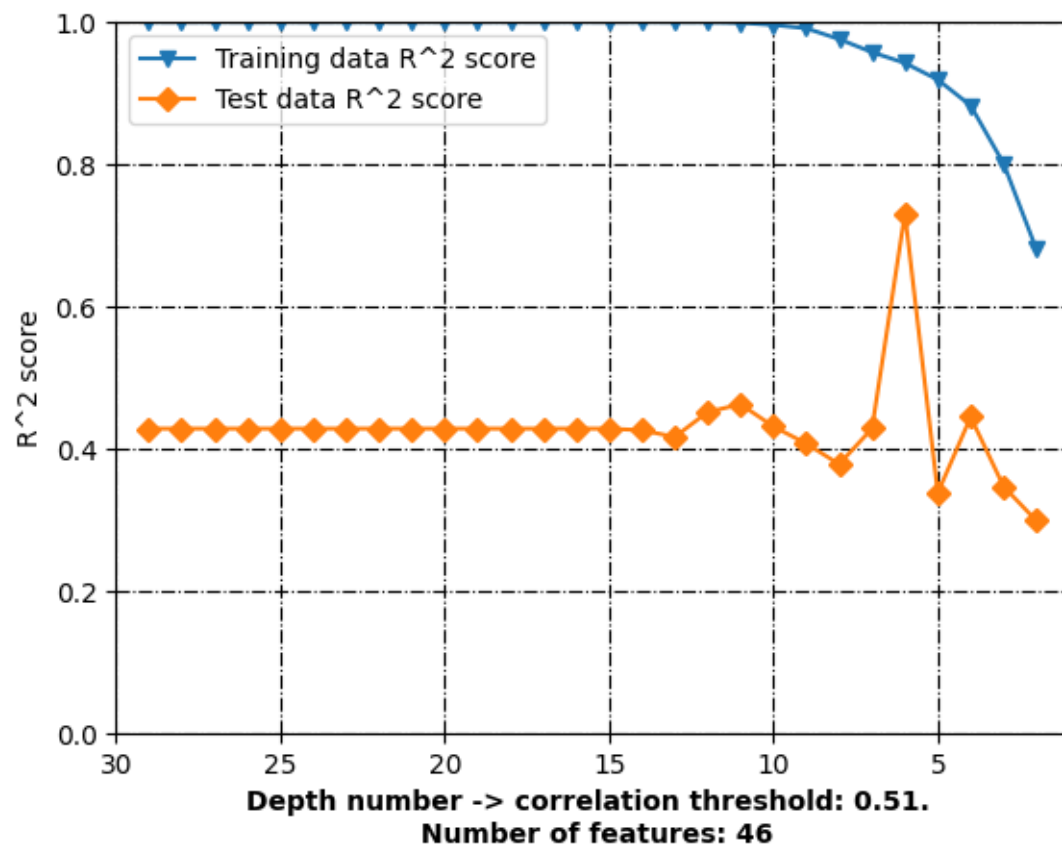

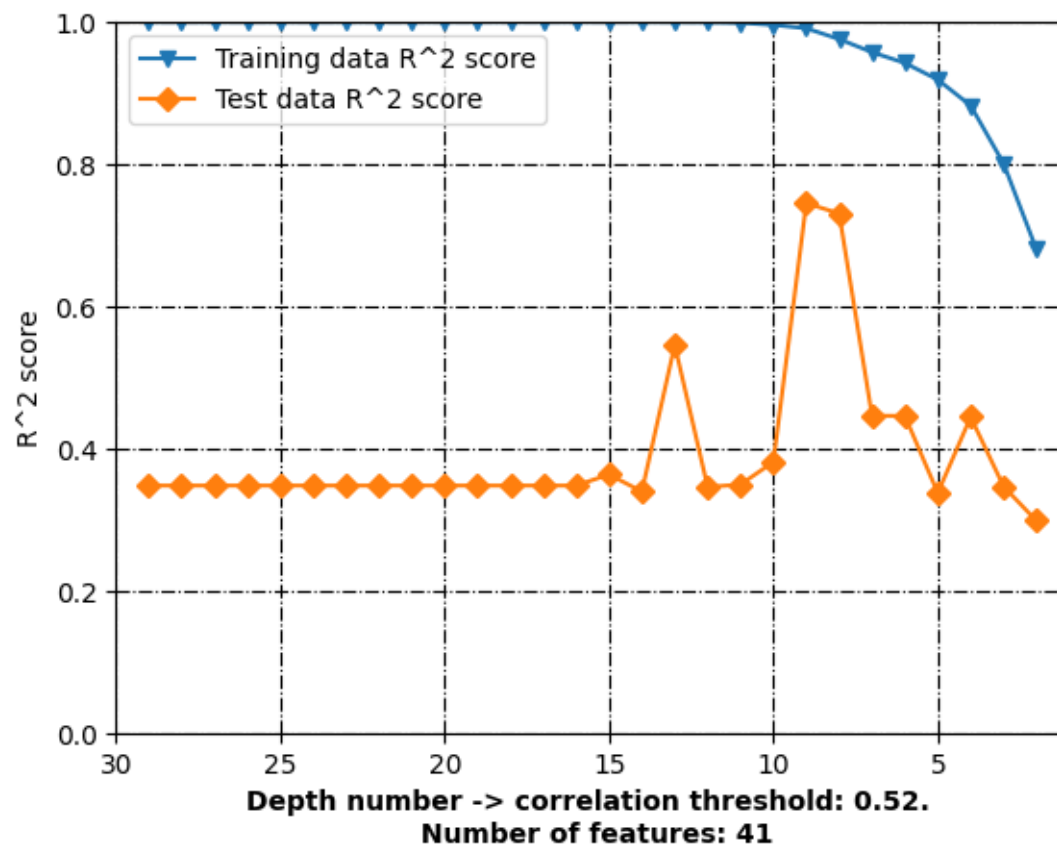

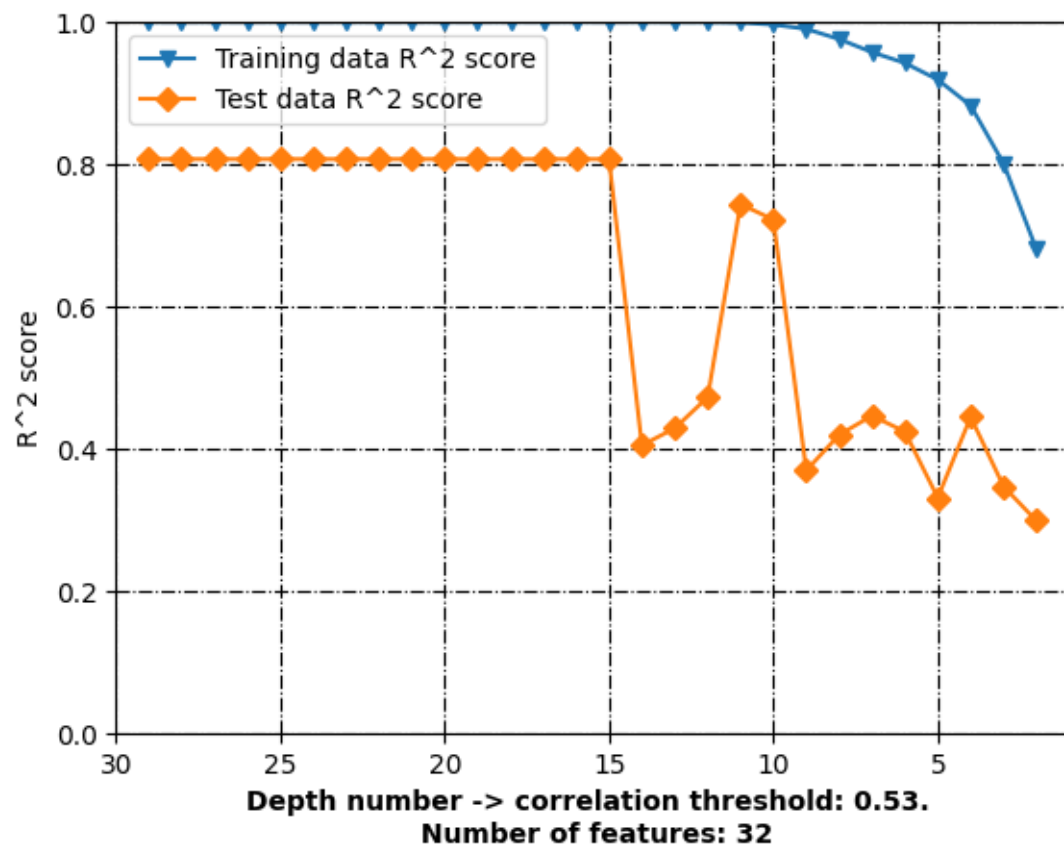

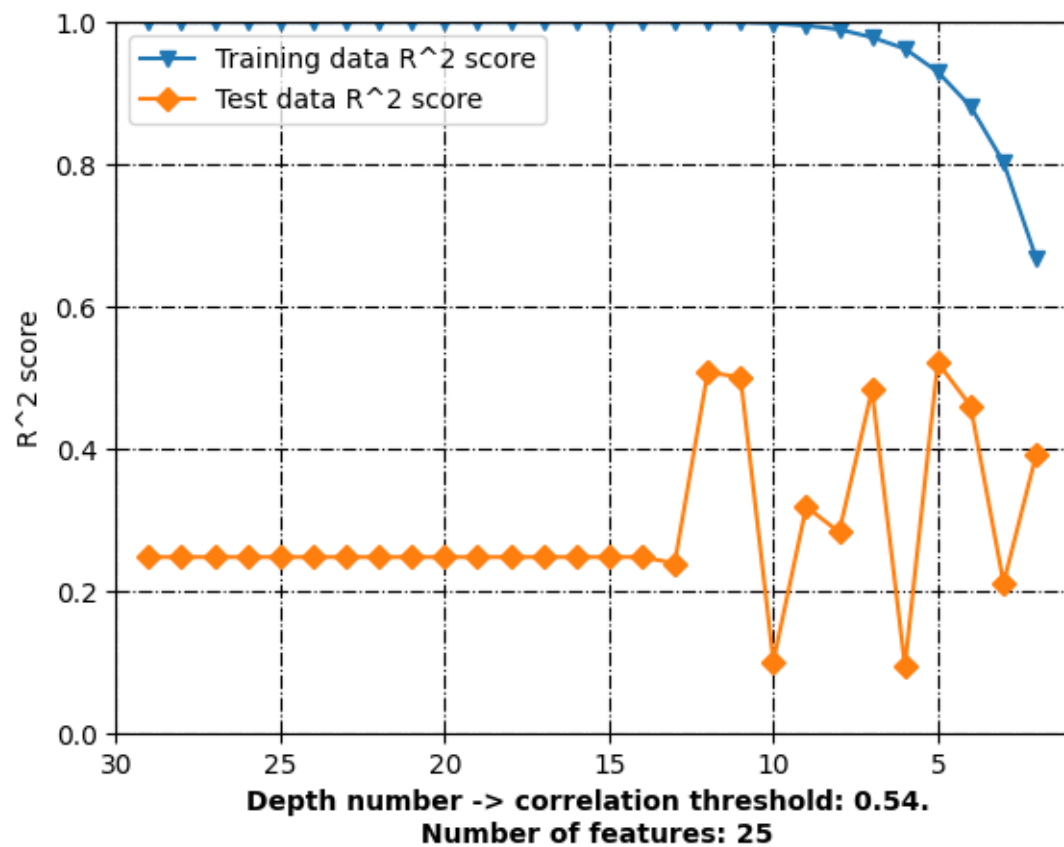

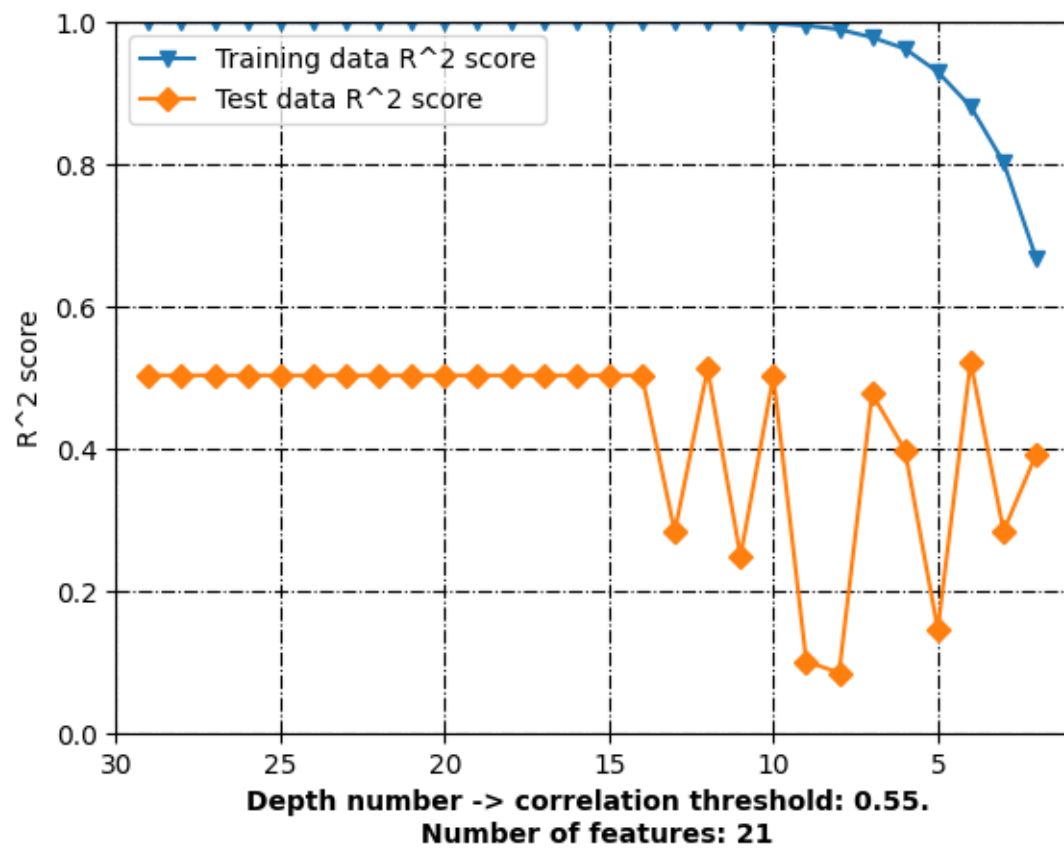

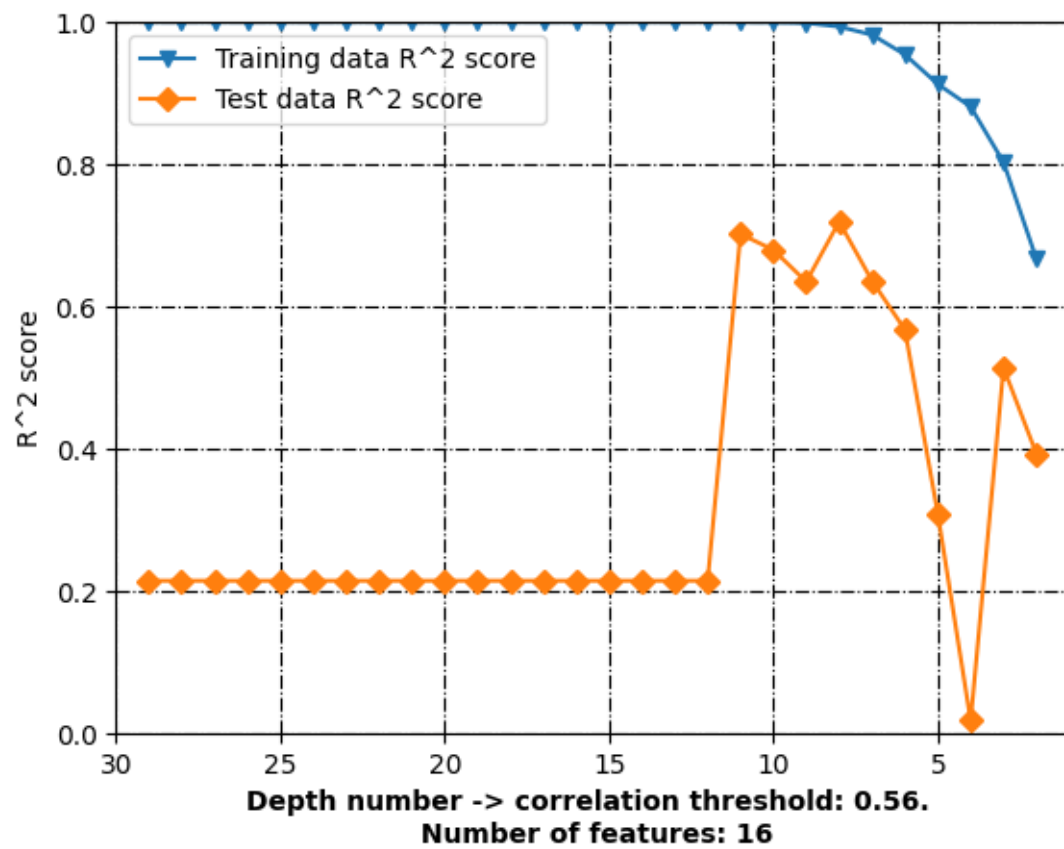



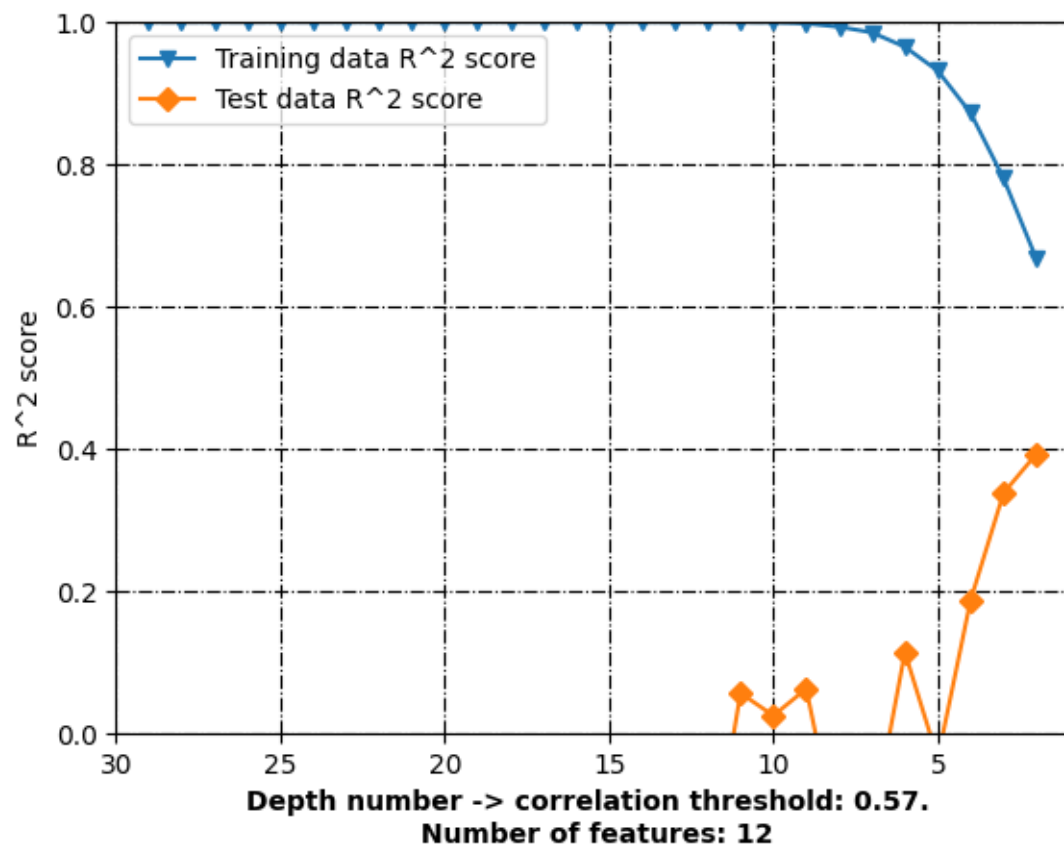

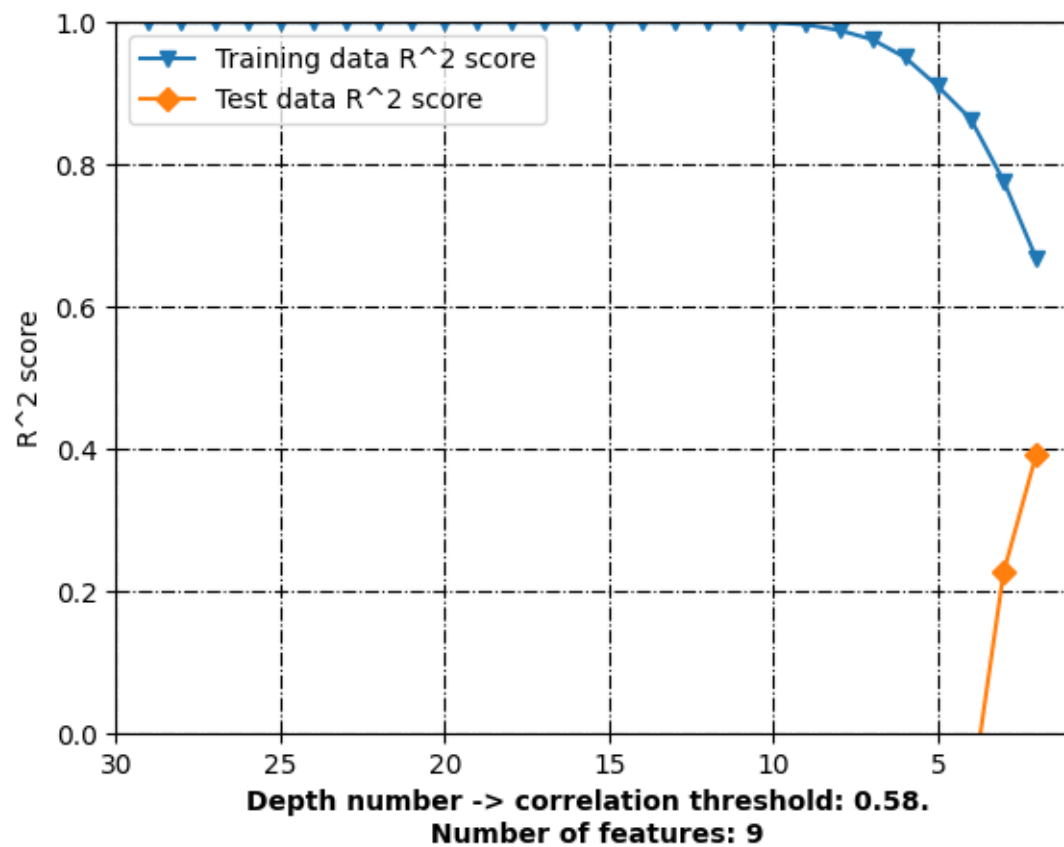

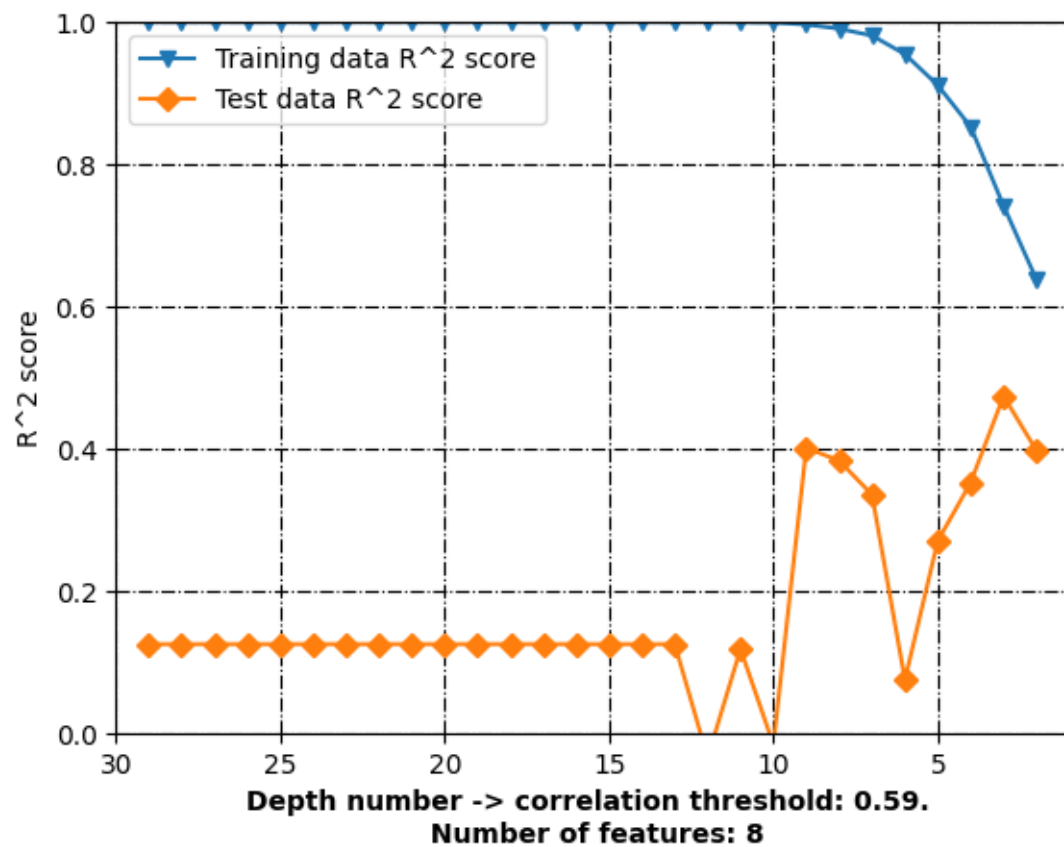

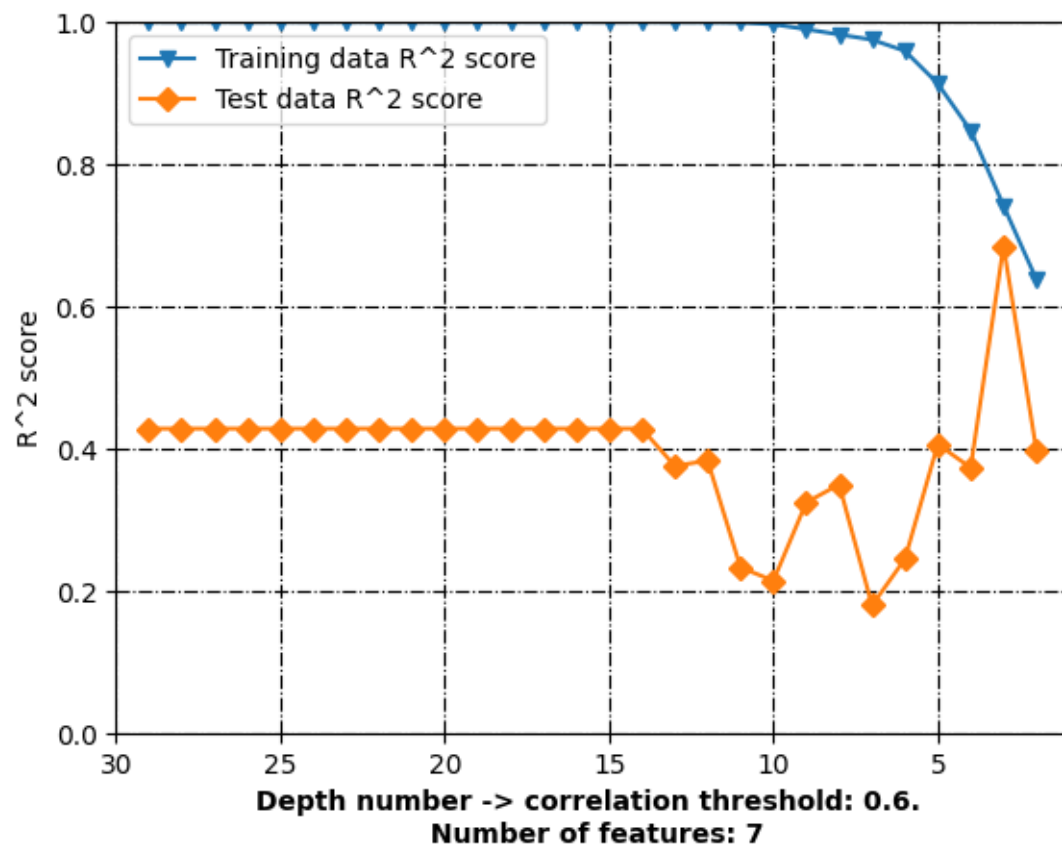

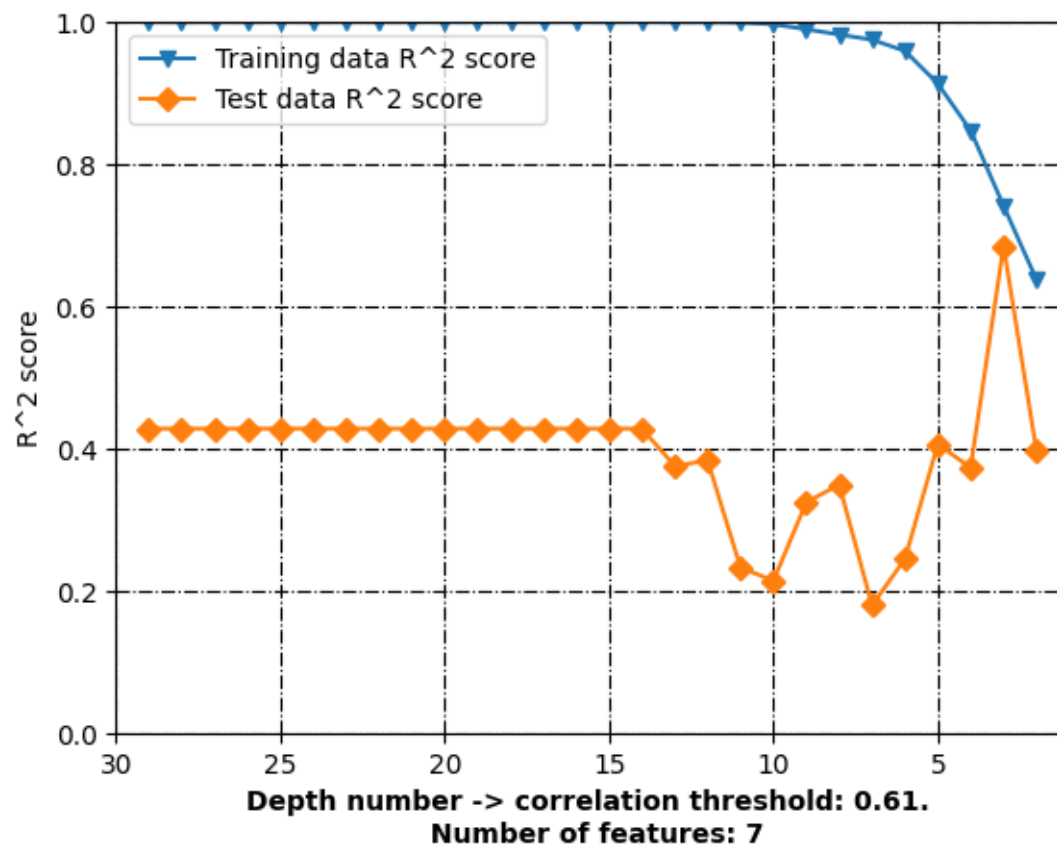

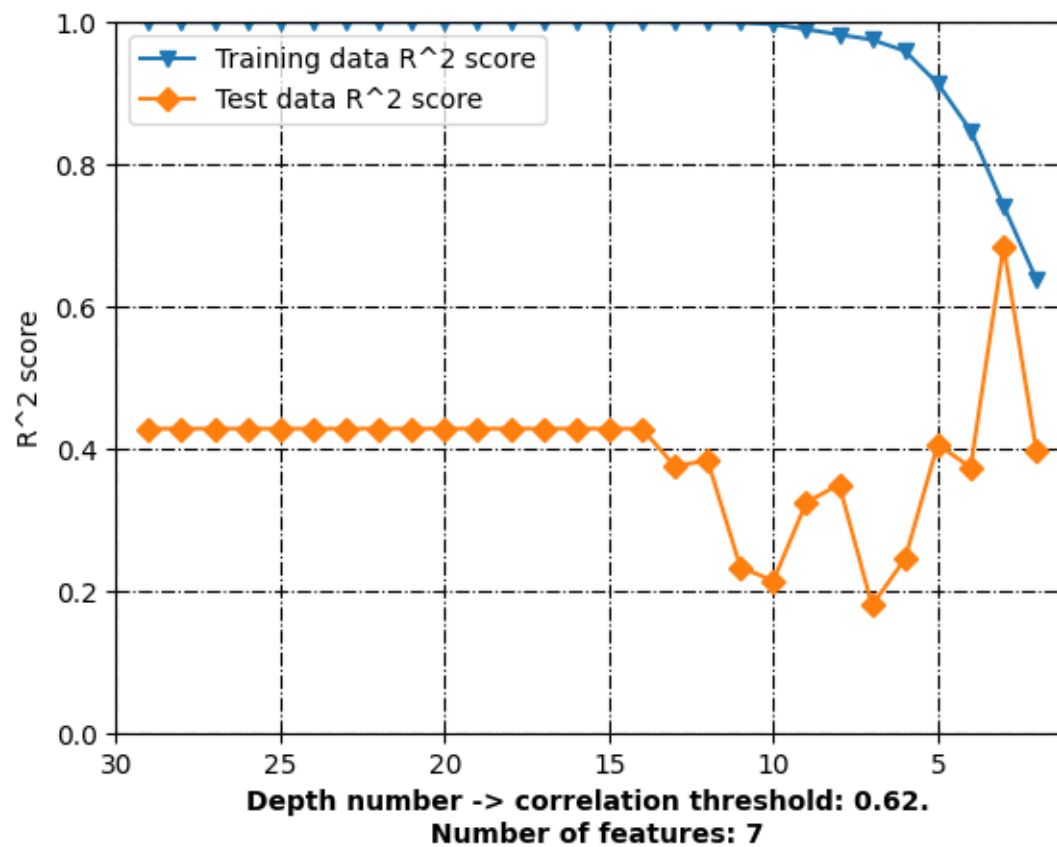

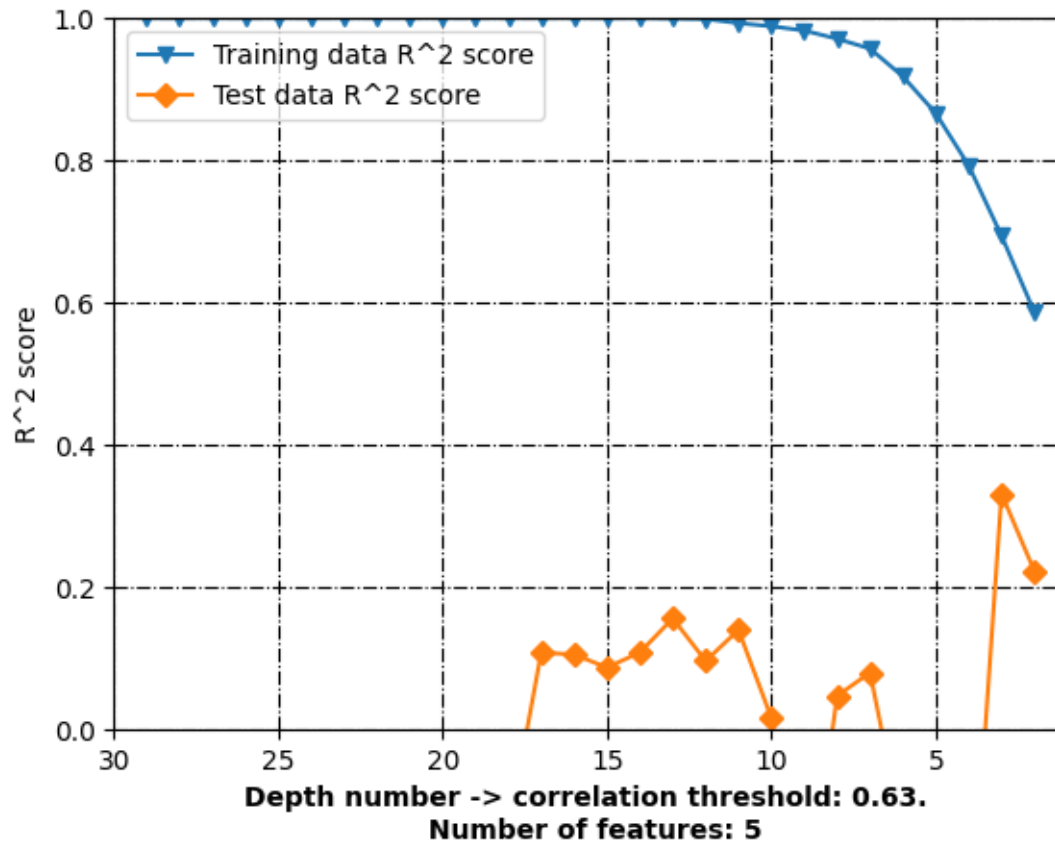

```
[21]: plt.plot(df_without_standardization['Correlation threshold'],  
             df_without_standardization['Number of features'], label = "Number of  
             features", marker='.')  
plt.legend()  
plt.xlabel('Correlation threshold')  
plt.ylabel('Number of features')  
plt.show()
```



[ ]:

### 3 Random Forest

```
[22]: without_standardization, train_r2_, test_r2_, hist1, hist2, target_column_name,
      ↪ training_data_RMSE, test_data_RMSE = pred_model.
      ↪ prepare_data_and_create_model(molecular_descriptors_df=data,
      ↪
      ↪         correlation_threshold=0.50,
      ↪
      ↪         standardization=False,
      ↪
      ↪         model_type='RandomForestRegressor',
      ↪
      ↪         n_estimators=12,
      ↪
      ↪         target_column_name = target,
      ↪
      ↪         random_state=random_state,
```



```

↪          train_test_split_=True,
↪          verbose=True)

```

I am not doing standardization...

|   | molecular descriptor name |  |
|---|---------------------------|--|
| 0 | AATS0Z                    |  |
| 1 | AATS0are                  |  |
| 2 | AATS0d                    |  |
| 3 | AATS0dv                   |  |
| 4 | AATS0i                    |  |

  

|   | molecular descriptor name | corr_value |
|---|---------------------------|------------|
| 0 | AATS0Z                    | 0.018677   |
| 1 | AATS0are                  | -0.341313  |
| 2 | AATS0d                    | -0.123443  |
| 3 | AATS0dv                   | -0.265670  |
| 4 | AATS0i                    | -0.428929  |

  

|   | molecular descriptor name | corr_value | absolute correlation value |
|---|---------------------------|------------|----------------------------|
| 0 | AATS0Z                    | 0.018677   | 0.018677                   |
| 1 | AATS0are                  | -0.341313  | 0.341313                   |
| 2 | AATS0d                    | -0.123443  | 0.123443                   |
| 3 | AATS0dv                   | -0.265670  | 0.265670                   |
| 4 | AATS0i                    | -0.428929  | 0.428929                   |

  

|     | molecular descriptor name | corr_value | absolute correlation value |
|-----|---------------------------|------------|----------------------------|
| 15  | AATS1i                    | -0.561620  | 0.561620                   |
| 113 | AATSC1c                   | 0.565682   | 0.565682                   |
| 125 | AATSC2c                   | -0.543393  | 0.543393                   |
| 221 | AETA_eta_R                | -0.515778  | 0.515778                   |
| 224 | AMID_C                    | 0.532458   | 0.532458                   |

  

|     | molecular descriptor name | corr_value | absolute correlation value |
|-----|---------------------------|------------|----------------------------|
| 15  | AATS1i                    | -0.561620  | 0.561620                   |
| 113 | AATSC1c                   | 0.565682   | 0.565682                   |
| 125 | AATSC2c                   | -0.543393  | 0.543393                   |
| 221 | AETA_eta_R                | -0.515778  | 0.515778                   |
| 224 | AMID_C                    | 0.532458   | 0.532458                   |

The model used is: RandomForest...

Return the coefficient of determination of the prediction:

0.6510534913729729

R<sup>2</sup> score: 0.9182393349313648

Correlation coefficient: 0.9582480550104784

Test data - unseen during training:

R<sup>2</sup> score: 0.6510534913729729

Correlation coefficient: 0.8068788579291025

```

[6.49928877 7.342496  7.56932961 5.62596181 6.3811566  5.98596459
 6.95701087 6.88213329 6.53686289 7.40323582 5.71393145 6.06943759
 7.47467813 6.79355014 7.20231788 6.23555845]

```

114 6.026872

```

10      7.856985
4       7.109020
95      5.200659
111     6.853872
79      6.327902
44      7.638272
47      7.022276
107     6.000000
11      7.250264
61      5.481486
56      6.657577
0       7.260428
92      7.141463
18      6.630970
78      6.244125

```

Name: LoVo/DX, dtype: float64

Training Root Mean Square Error: 0.27496269898128745

Testing Root Mean Square Error: 0.42645349872036425

```

[23]: print(target_column_name+str('_transformed'))
      print(hist1[target_column_name].hist())

```

LoVo/DX\_transformed

AxesSubplot(0.125,0.11;0.775x0.77)



```
[24]: with_standardization, train_r2_, test_r2_, hist1, hist2, target_column_name,
      ↪ training_data_RMSE, test_data_RMSE = pred_model.
      ↪ prepare_data_and_create_model(molecular_descriptors_df=data,
      ↪
      ↪         correlation_threshold=0.50,
      ↪
      ↪         standardization=True,
      ↪
      ↪         model_type='RandomForestRegressor',
      ↪
      ↪         n_estimators=12,
      ↪
      ↪         target_column_name = target,
      ↪
      ↪         random_state=random_state,
      ↪
      ↪         train_test_split=True,
      ↪
      ↪         verbose=True)
```

I am doing standardization...

|   | molecular descriptor name |  |
|---|---------------------------|--|
| 0 | AATSOZ                    |  |
| 1 | AATSOare                  |  |
| 2 | AATSOd                    |  |
| 3 | AATSOdv                   |  |
| 4 | AATSOi                    |  |

  

|   | molecular descriptor name | corr_value |
|---|---------------------------|------------|
| 0 | AATSOZ                    | 0.018677   |
| 1 | AATSOare                  | -0.341313  |
| 2 | AATSOd                    | -0.123443  |
| 3 | AATSOdv                   | -0.265670  |
| 4 | AATSOi                    | -0.428929  |

  

|   | molecular descriptor name | corr_value | absolute correlation value |
|---|---------------------------|------------|----------------------------|
| 0 | AATSOZ                    | 0.018677   | 0.018677                   |
| 1 | AATSOare                  | -0.341313  | 0.341313                   |
| 2 | AATSOd                    | -0.123443  | 0.123443                   |
| 3 | AATSOdv                   | -0.265670  | 0.265670                   |
| 4 | AATSOi                    | -0.428929  | 0.428929                   |

  

|     | molecular descriptor name | corr_value | absolute correlation value |
|-----|---------------------------|------------|----------------------------|
| 15  | AATS1i                    | -0.561620  | 0.561620                   |
| 113 | AATSC1c                   | 0.565682   | 0.565682                   |
| 125 | AATSC2c                   | -0.543393  | 0.543393                   |
| 221 | AETA_eta_R                | -0.515778  | 0.515778                   |
| 224 | AMID_C                    | 0.532458   | 0.532458                   |

|     | molecular descriptor name | corr_value | absolute correlation value |
|-----|---------------------------|------------|----------------------------|
| 15  | AATS1i                    | -0.561620  | 0.561620                   |
| 113 | AATSC1c                   | 0.565682   | 0.565682                   |
| 125 | AATSC2c                   | -0.543393  | 0.543393                   |
| 221 | AETA_eta_R                | -0.515778  | 0.515778                   |
| 224 | AMID_C                    | 0.532458   | 0.532458                   |

The model used is: RandomForest...

Return the coefficient of determination of the prediction:

0.6510534913729729

R<sup>2</sup> score: 0.9182393349313648

Correlation coefficient: 0.9582480550104784

Test data - unseen during training:

R<sup>2</sup> score: 0.6510534913729729

Correlation coefficient: 0.8068788579291025

[6.49928877 7.342496 7.56932961 5.62596181 6.3811566 5.98596459

6.95701087 6.88213329 6.53686289 7.40323582 5.71393145 6.06943759

7.47467813 6.79355014 7.20231788 6.23555845]

114 6.026872

10 7.856985

4 7.109020

95 5.200659

111 6.853872

79 6.327902

44 7.638272

47 7.022276

107 6.000000

11 7.250264

61 5.481486

56 6.657577

0 7.260428

92 7.141463

18 6.630970

78 6.244125

Name: LoVo/DX, dtype: float64

Training Root Mean Square Error: 0.27496269898128745

Testing Root Mean Square Error: 0.42645349872036425

### 3.1 Search inside correlation space

```
[25]: step = 0.01
initial_step = corr_low
last_step = corr_high
first_list = [x / 100.0 for x in range(int(initial_step*100),
    ↪int(last_step*100), int(step*100))]
n_estimators = [range(2,21,1)]
corr_th = []
second_list = []
```

```

third_list = []
fourth_l = []
fifth_l = []
f_list = []
fif_list = []
for i in first_list:

    for estimator in n_estimators[0]:

        without_standardization, train_r2, test_r2, _, h_, target_column_name,
        ↪ training_data_RMSE, test_data_RMSE = pred_model.
        ↪ prepare_data_and_create_model(molecular_descriptors_df=data,

        ↪ correlation_threshold=i,

        ↪ standardization=False,

        ↪ model_type='RandomForestRegressor',

        ↪ n_estimators_=estimator,

        ↪ target_column_name = target,

        ↪ random_state=random_state,

        ↪ train_test_split_=True,

        ↪ verbose=False)
        corr_th.append(i)
        second_list.append(train_r2)
        third_list.append(test_r2)
        fourth_l.append(training_data_RMSE)
        fifth_l.append(test_data_RMSE)
        f_list.append(len(h_))
        fif_list.append(estimator)

```

```

[26]: df_without_standardization = pd.DataFrame(data=corr_th, columns=["Correlation_
        ↪ threshold"])
df_without_standardization['Training data R^2 score'] = second_list
df_without_standardization['Test data R^2 score'] = third_list
df_without_standardization['Training RMSE'] = fourth_l
df_without_standardization['Test RMSE'] = fifth_l
df_without_standardization['Number of features'] = f_list
df_without_standardization['Number of estimators'] = fif_list

```

```

[27]: df_random_forest = df_without_standardization.copy()
      #df_without_standardization.to_excel('../Data/
      ↪A549_Random_forest_rs_'+str(random_state)+'.xlsx')

[28]: corre_list = [x / 100.0 for x in range(int(initial_step*100),
      ↪int(last_step*100), int(0.01*100))]
      for element in corre_list:
          element_ =
          ↪df_without_standardization[df_without_standardization['Correlation_
          ↪threshold'] == float(element)]
          plt.plot(element_['Number of estimators'], element_['Training data R^2_
          ↪score'], label = "Training data R^2 score", marker='v')
          plt.plot(element_['Number of estimators'], element_['Test data R^2 score'],
          ↪label = "Test data R^2 score", marker='D')
          plt.legend()
          plt.xlabel('Number of estimators -> correlation threshold: '+str(element)+'.'
          ↪\n Number of features: '+str(element_['Number of features'].iloc[0]))
          plt.xlim(max(element_['Number of estimators'])+1, min(element_['Number of_
          ↪estimators'])-1)
          plt.ylabel('R^2 score')
          plt.ylim([0, 1])
          plt.rc('grid', linestyle="-. ", color='black')
          plt.grid(True)
          plt.show()

```

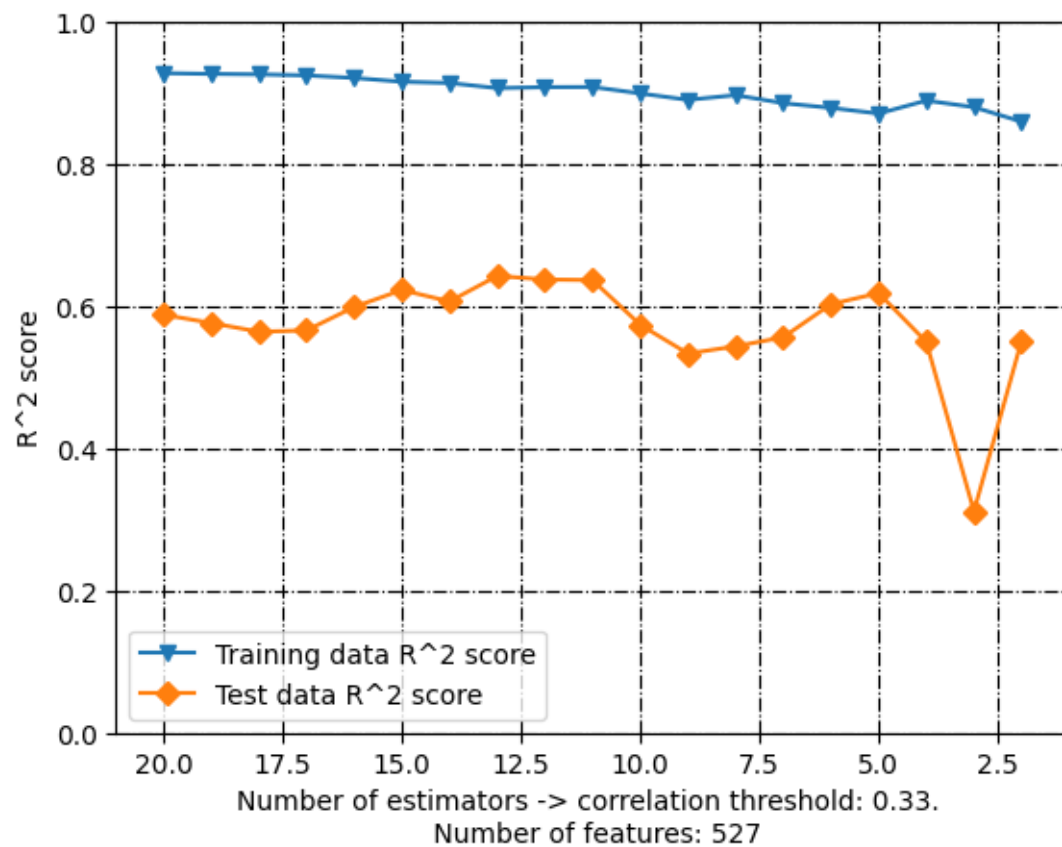

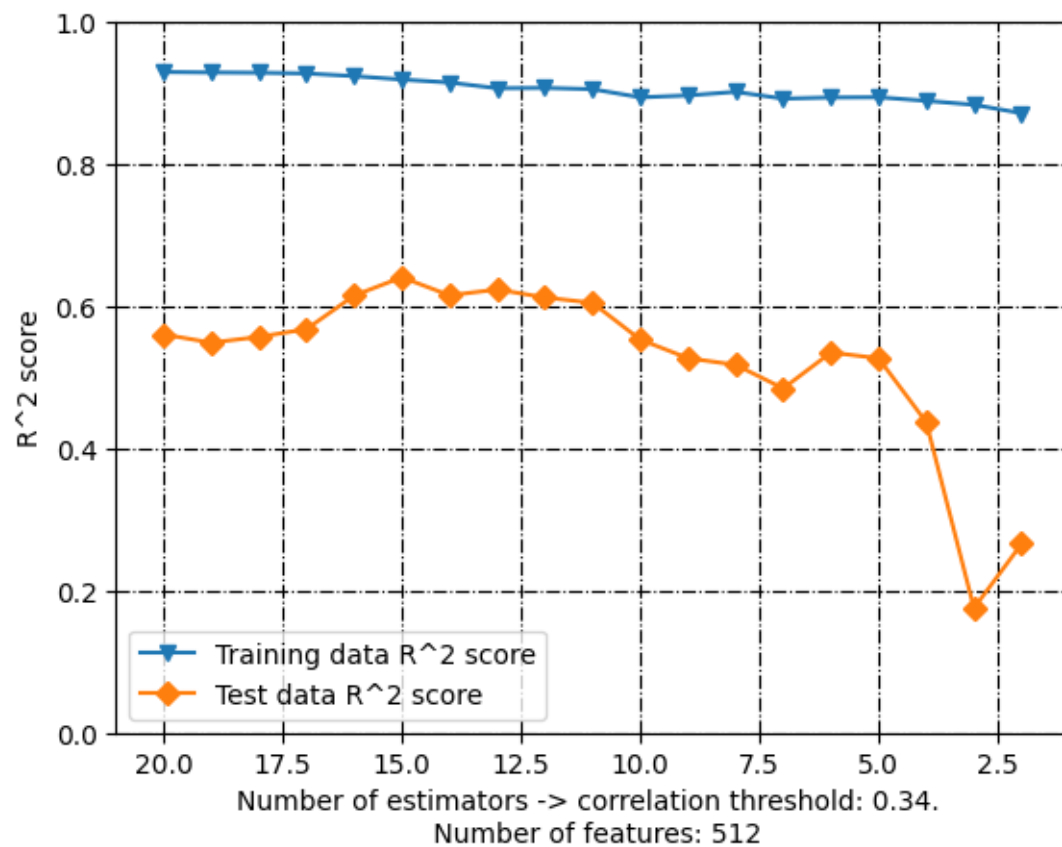



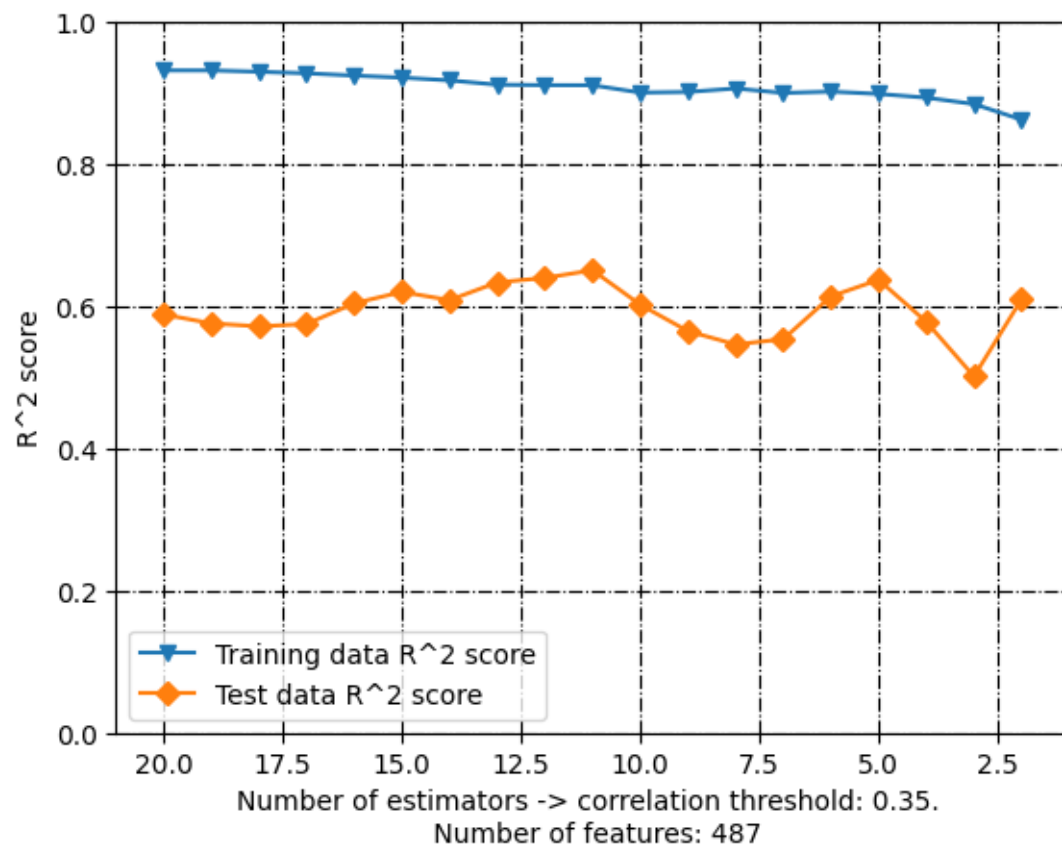

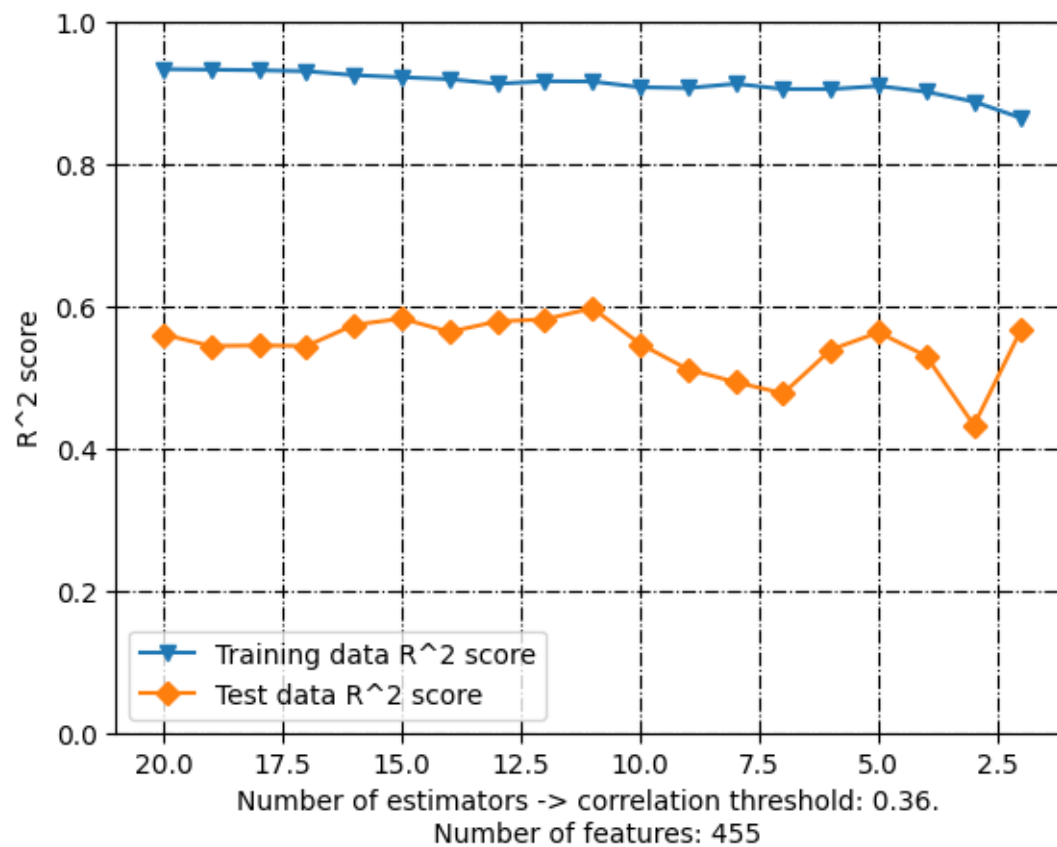

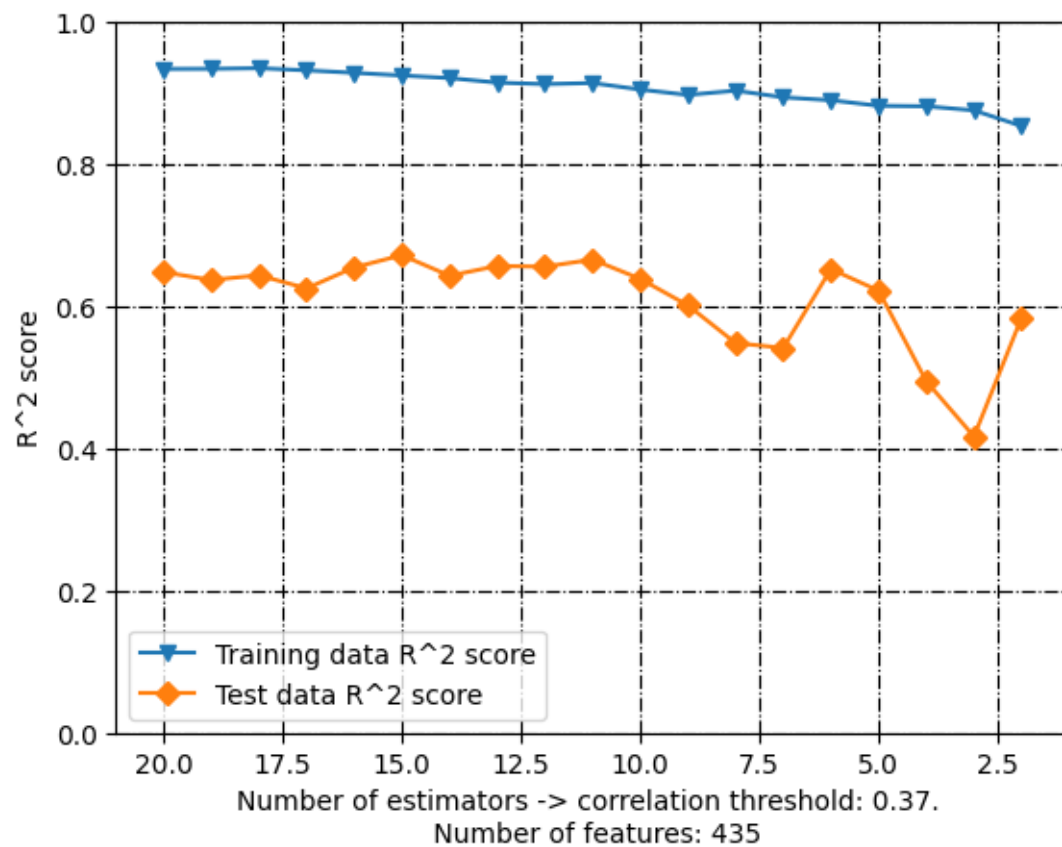

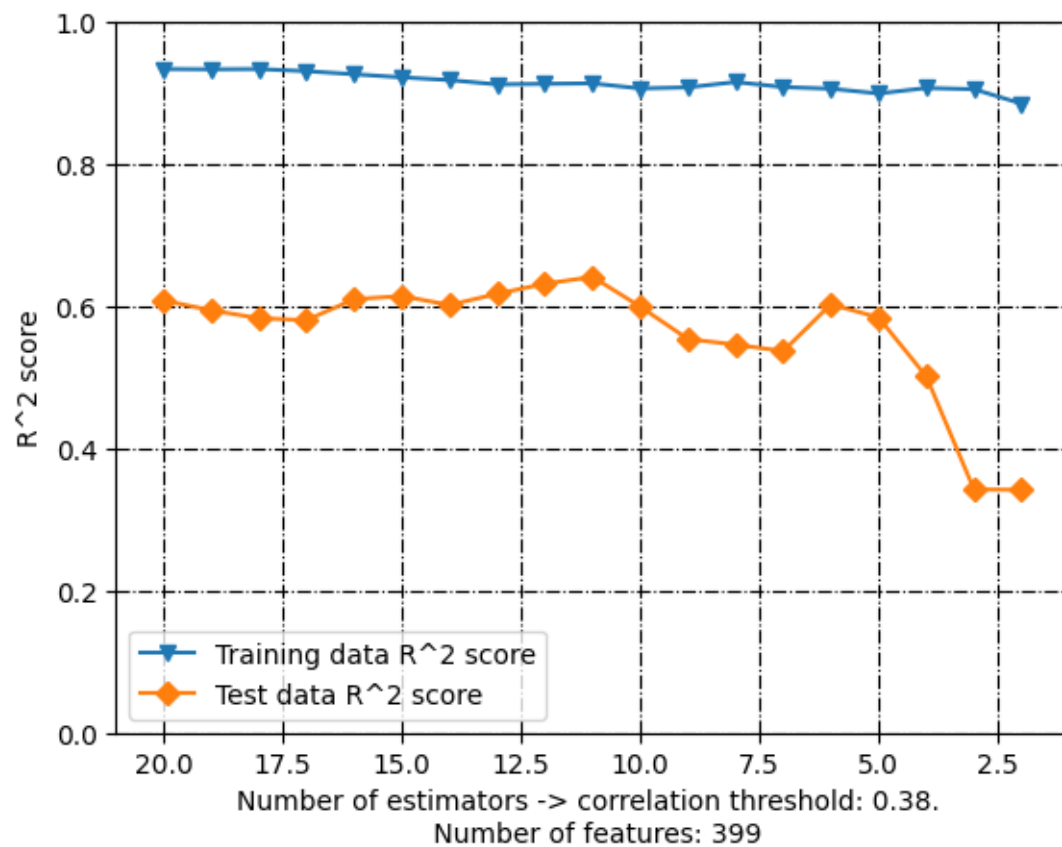

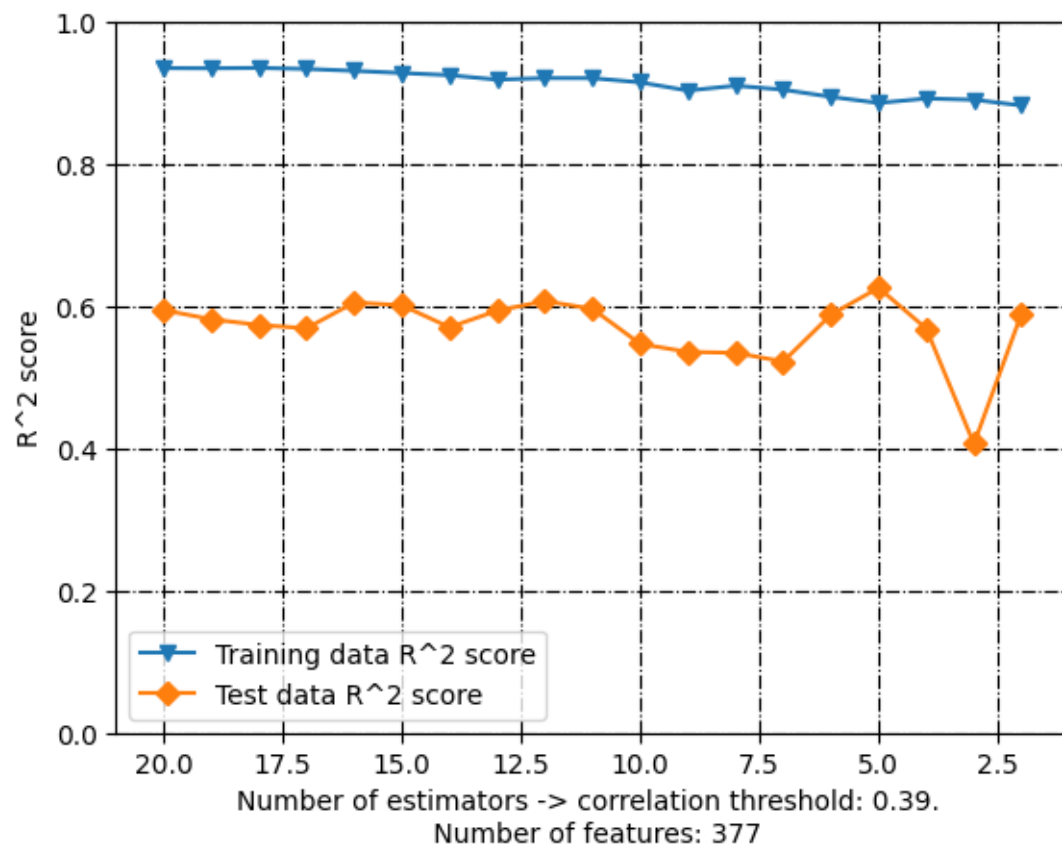

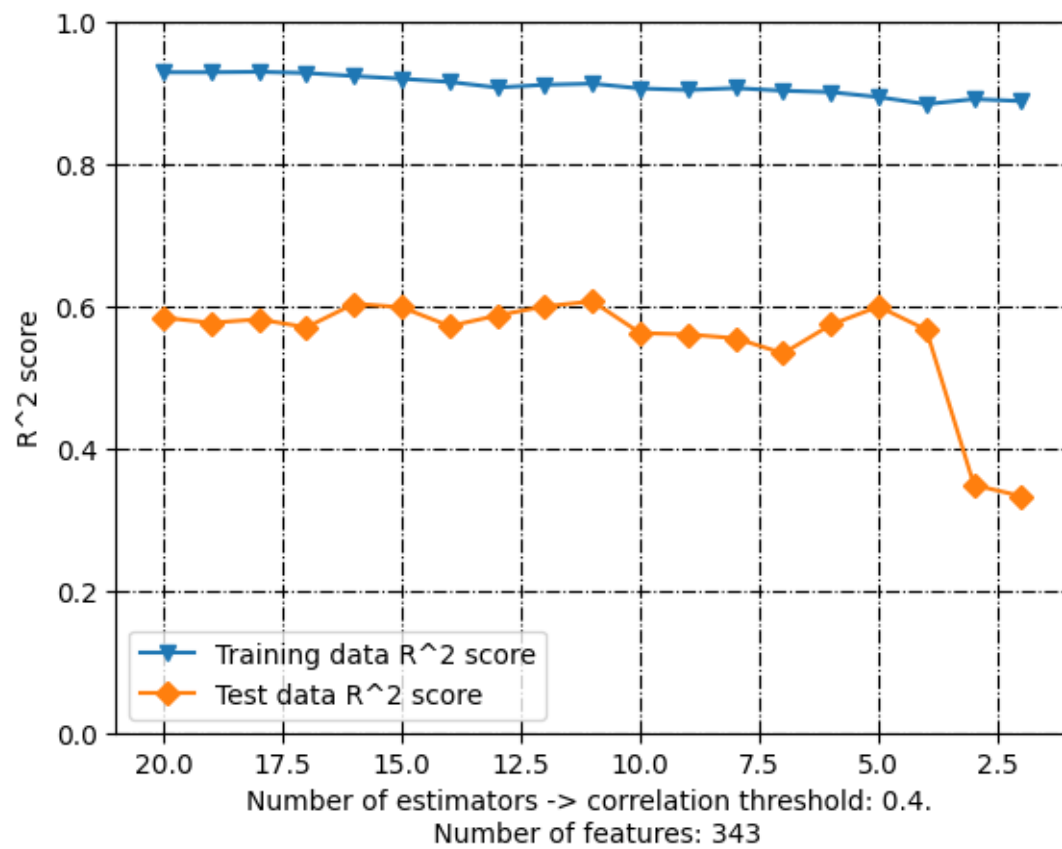

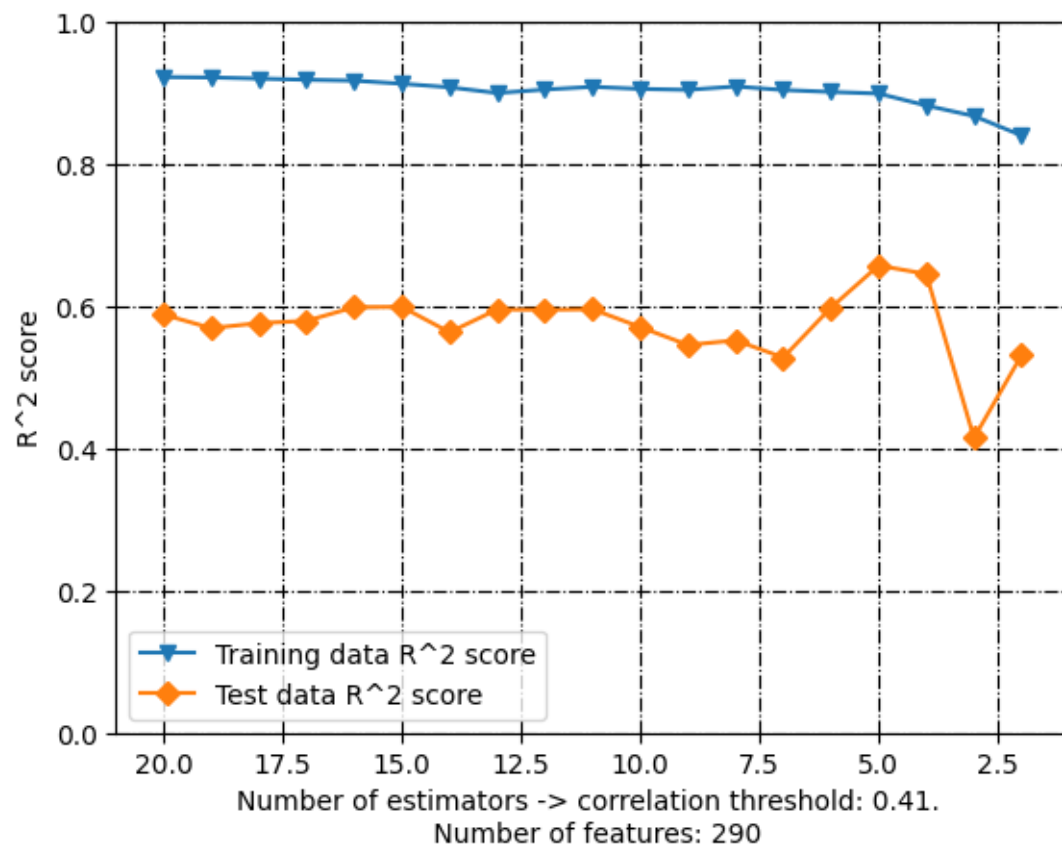

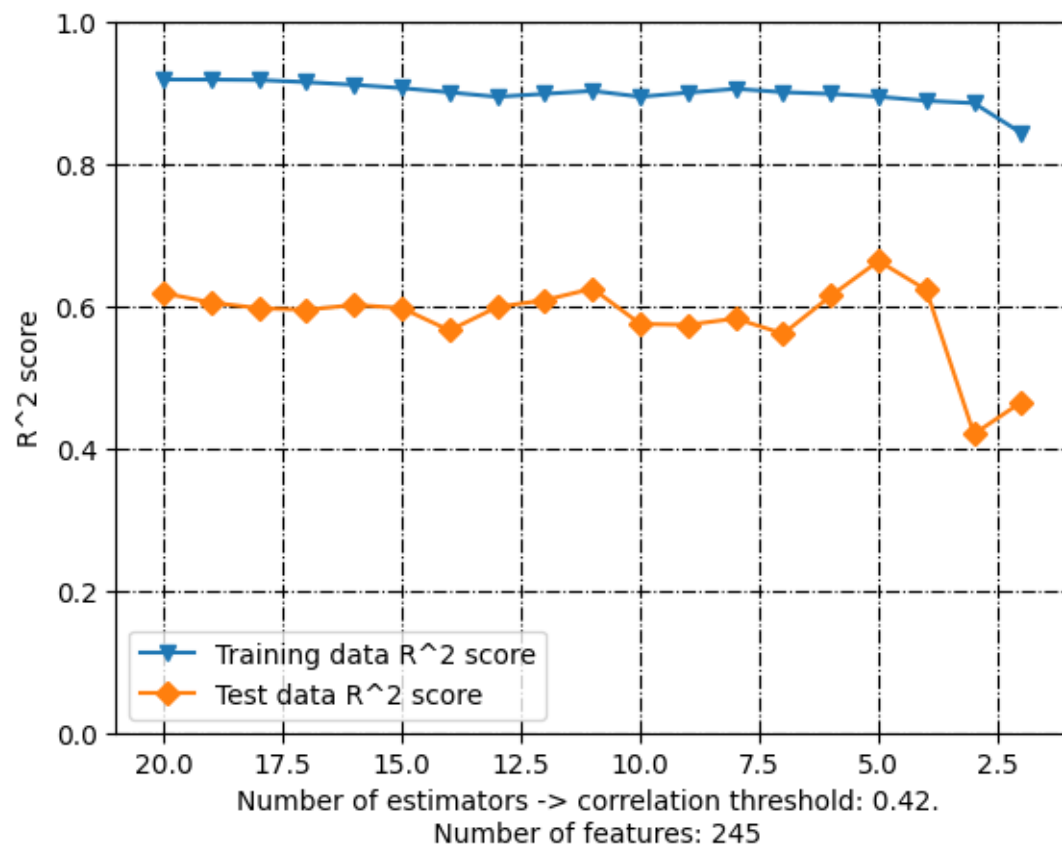



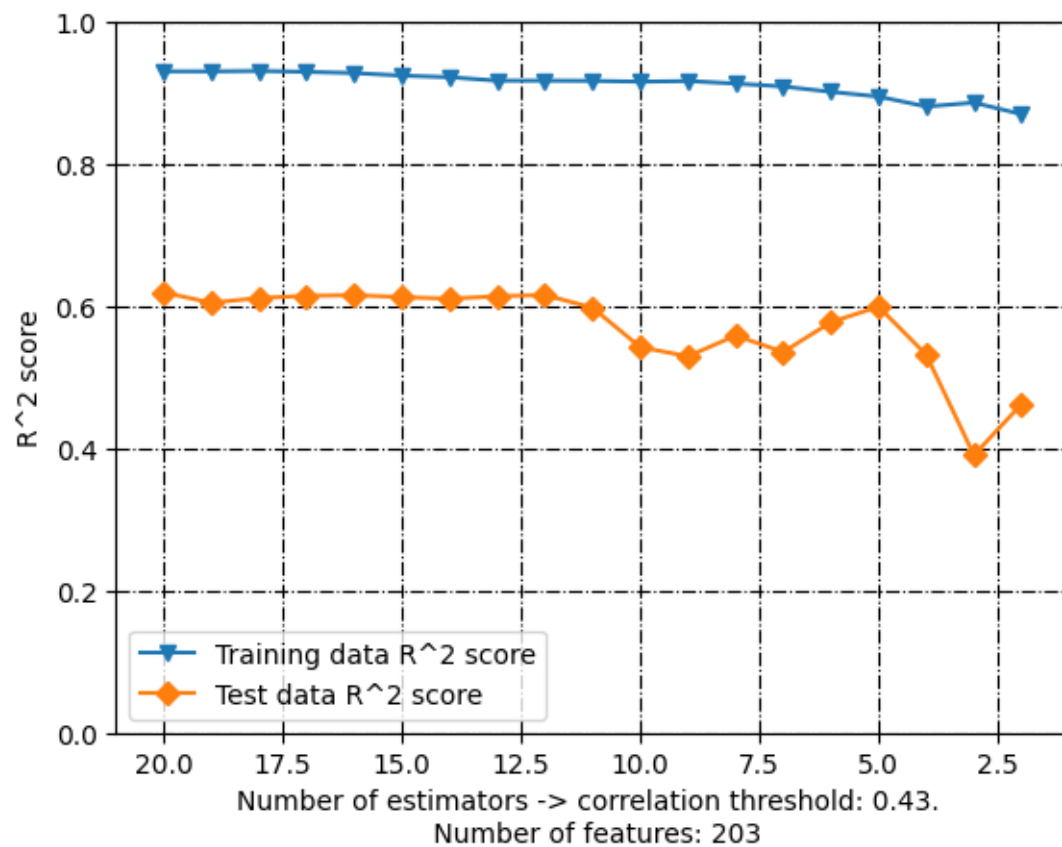

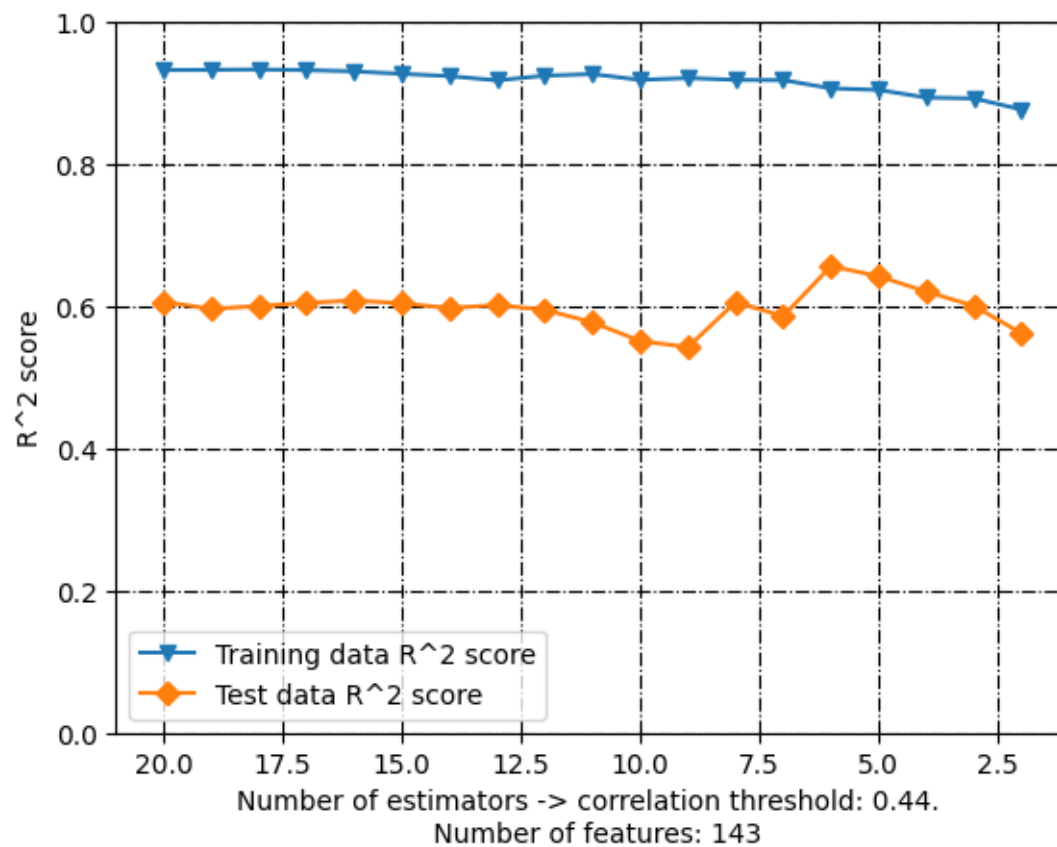

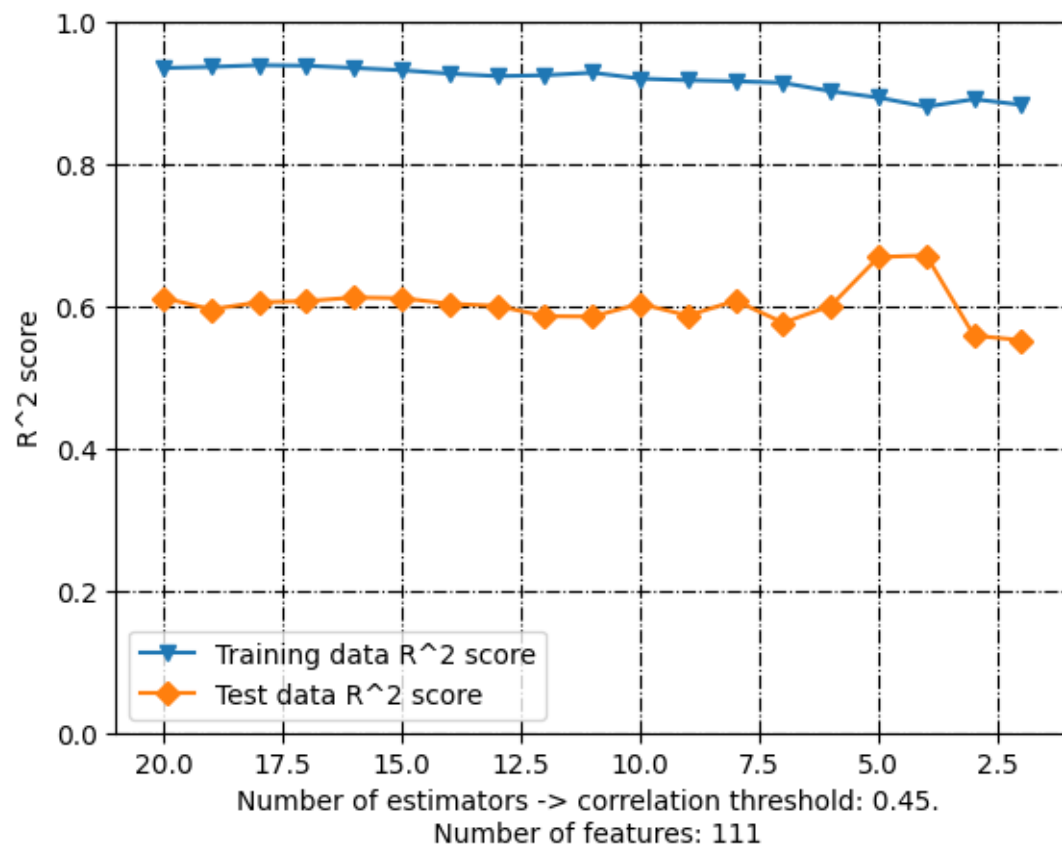

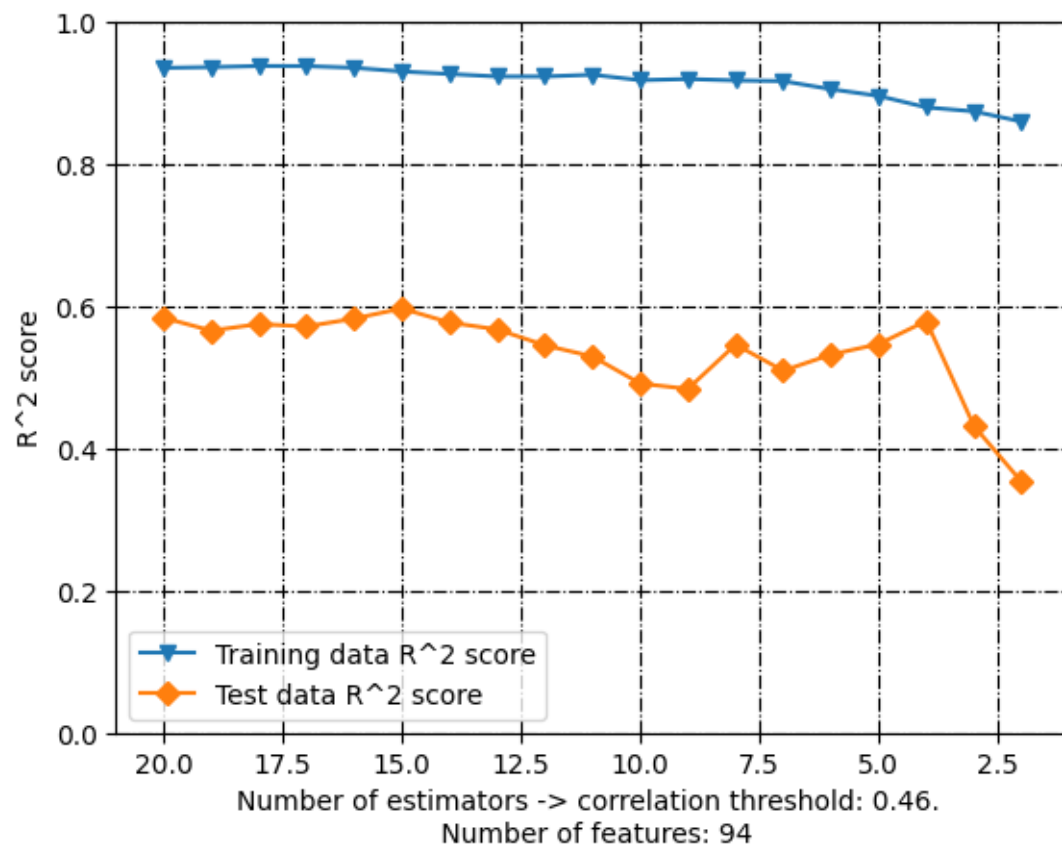

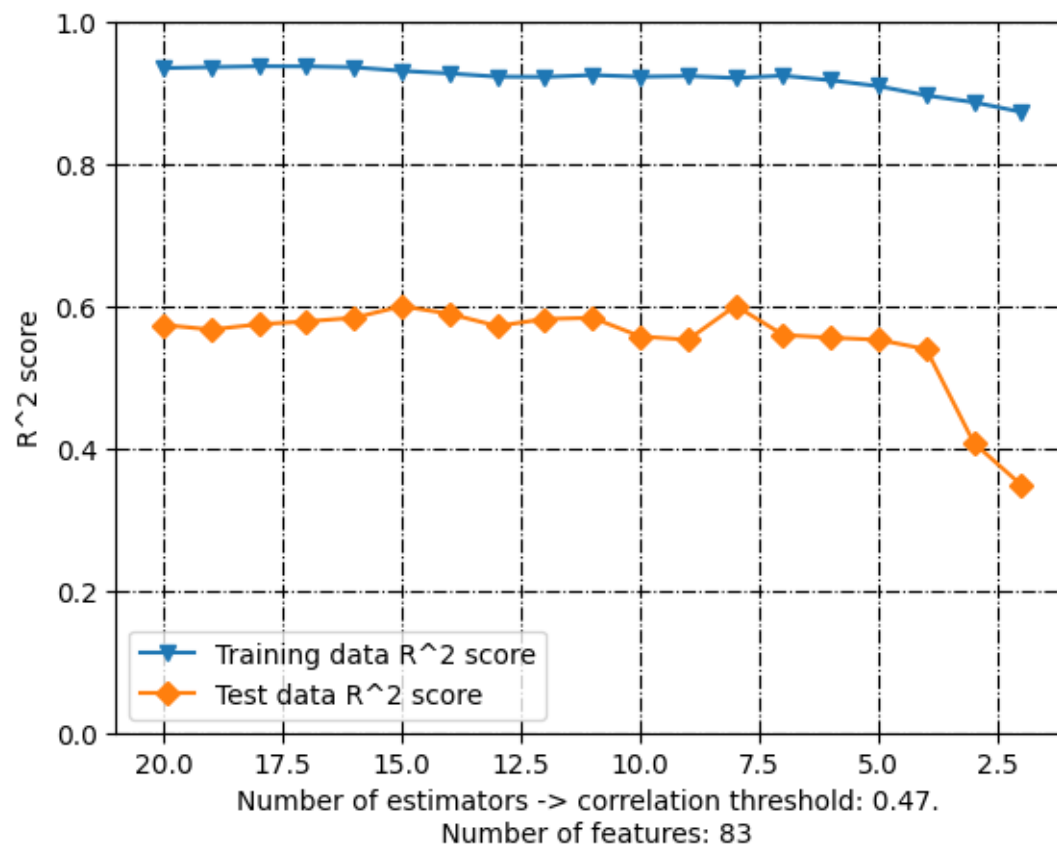

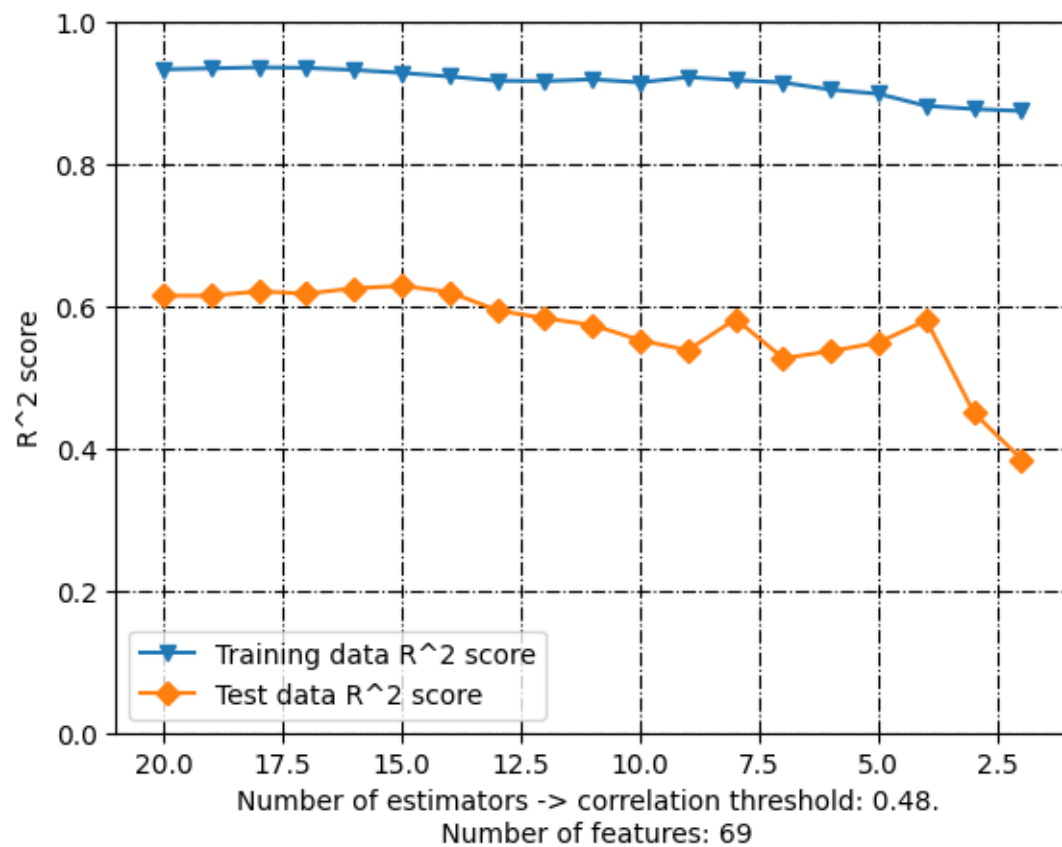

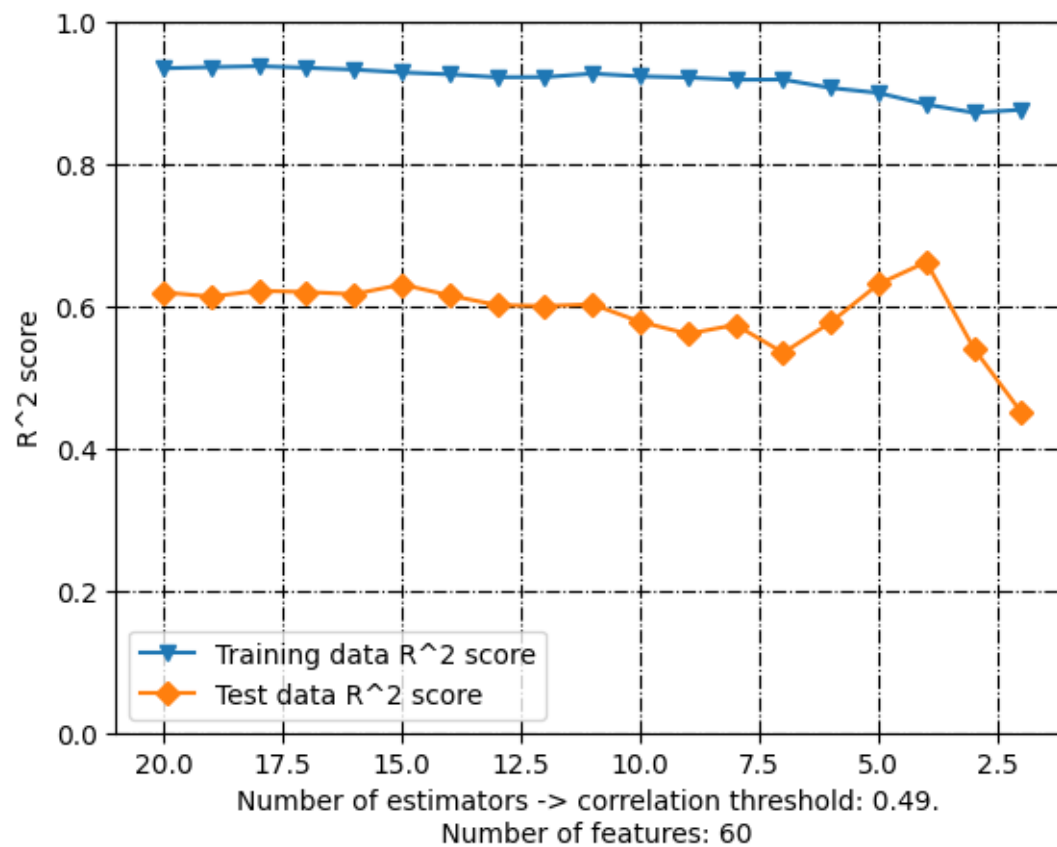

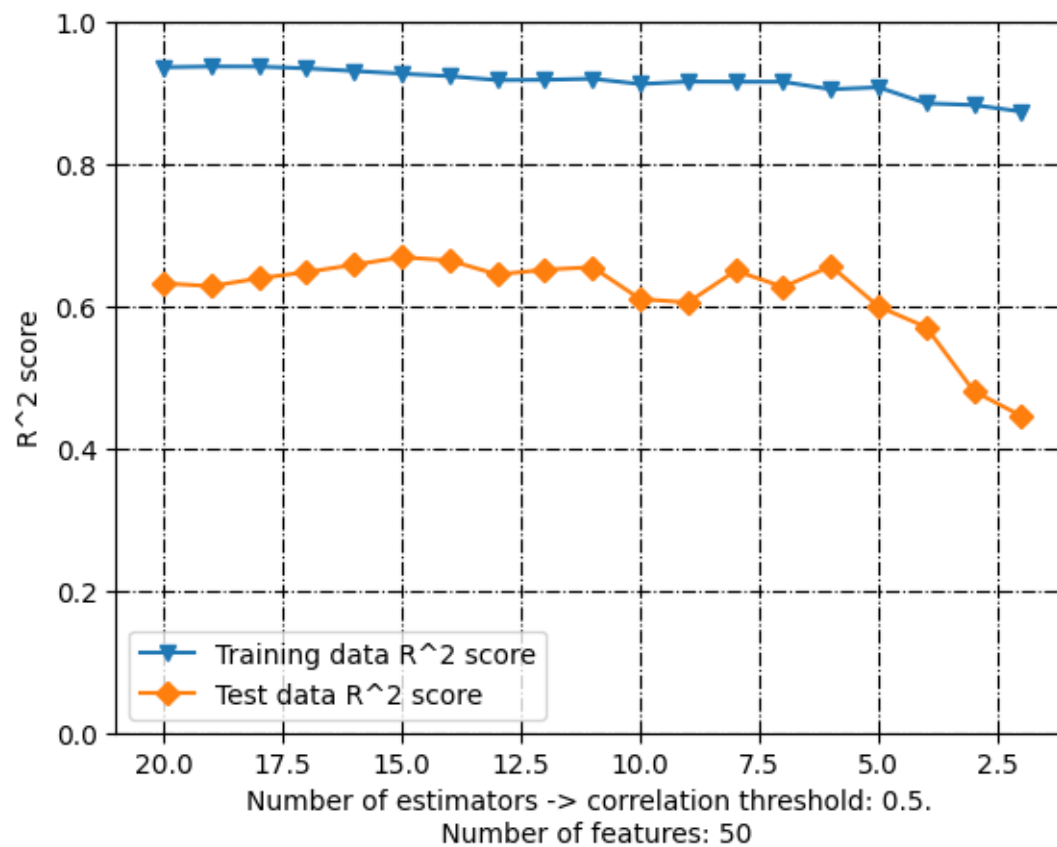



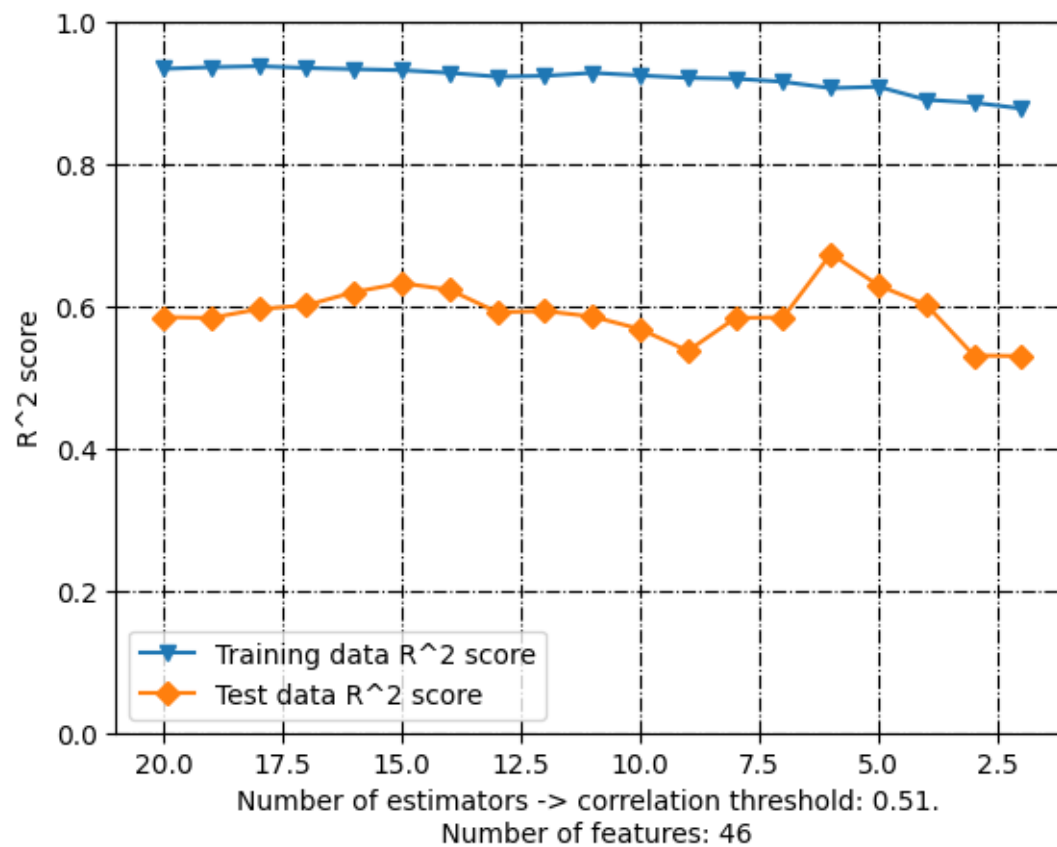

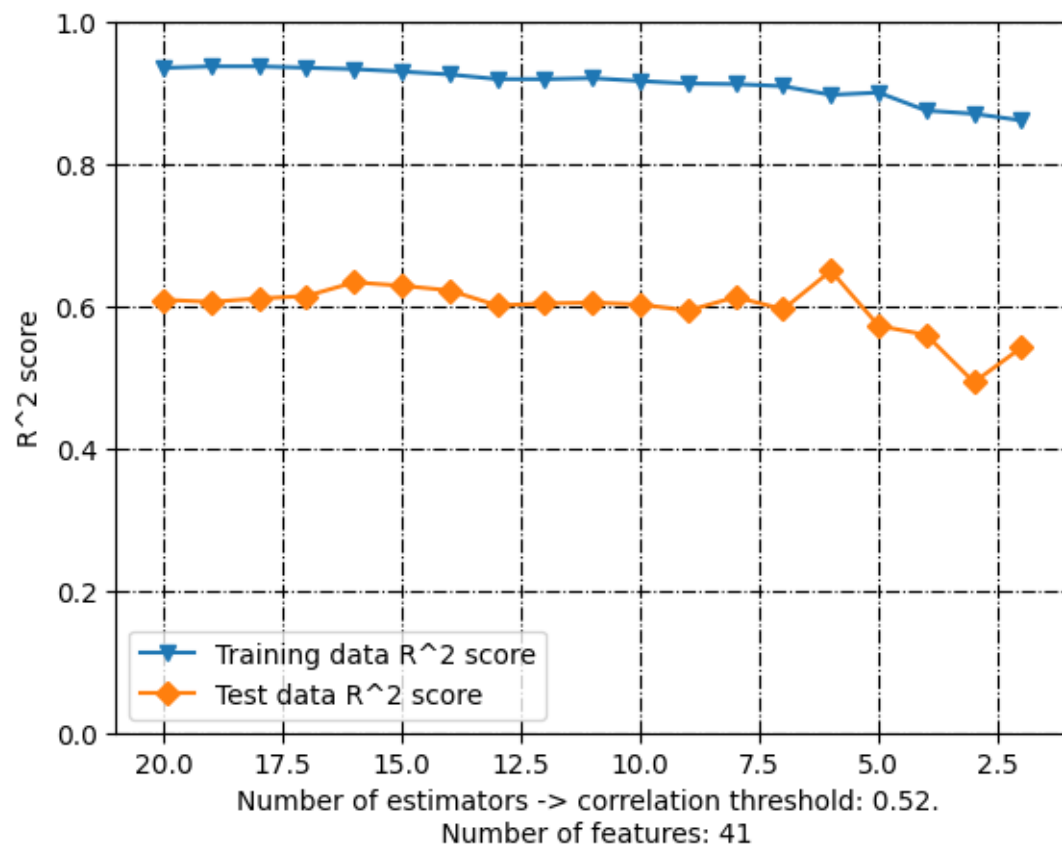

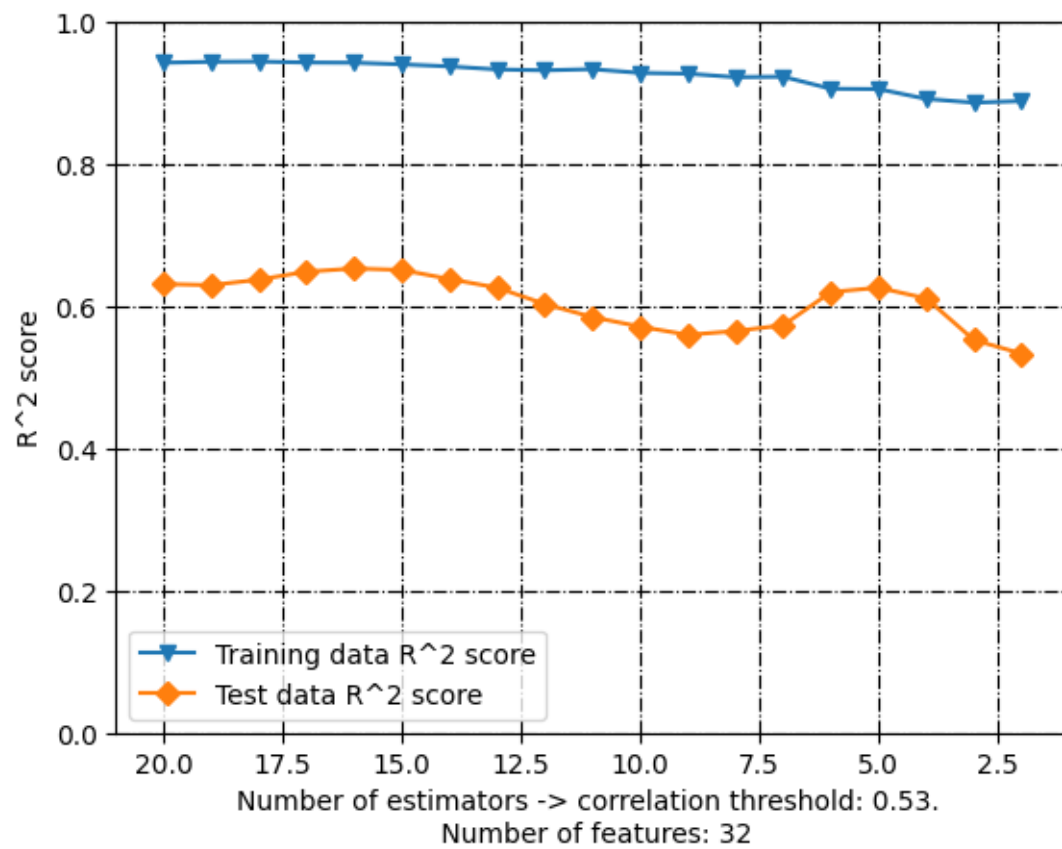

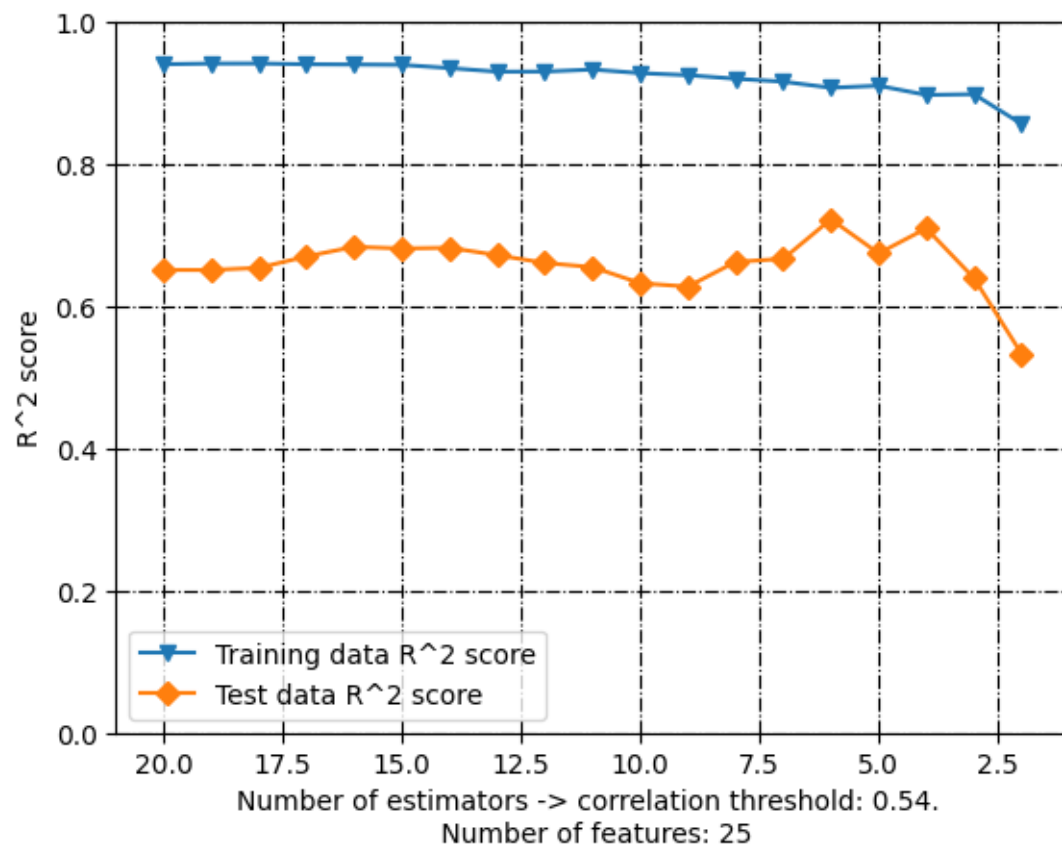

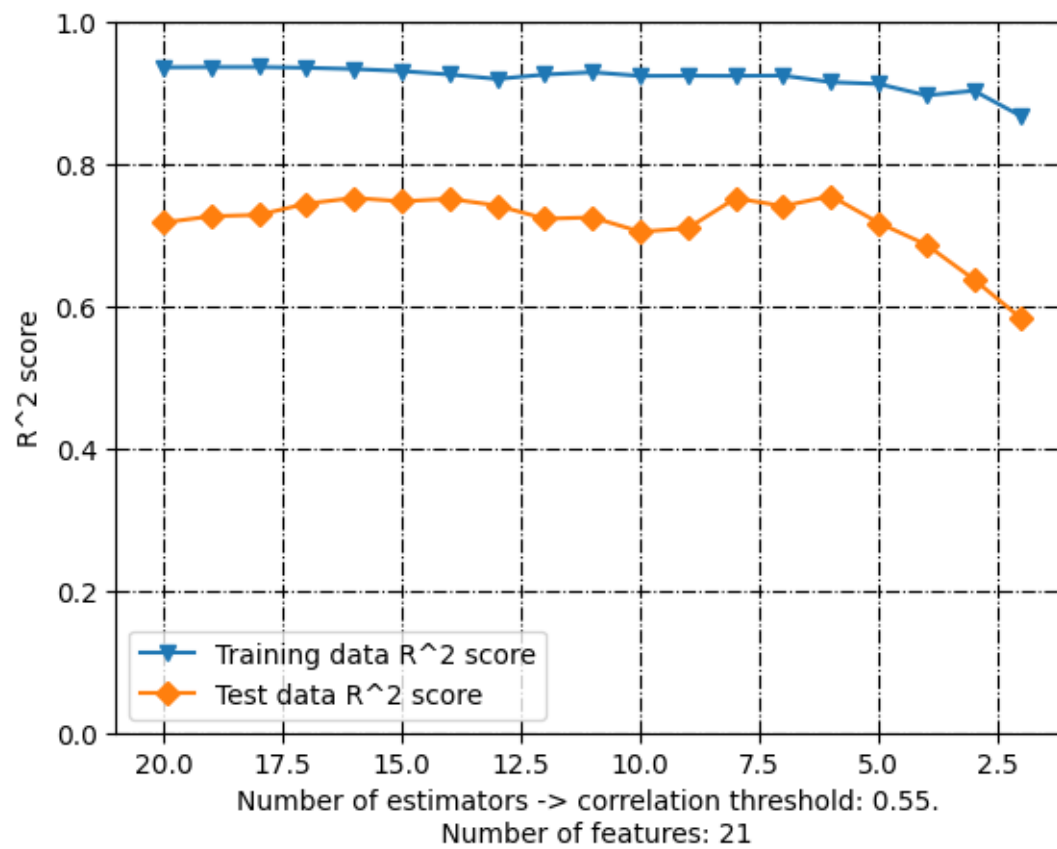

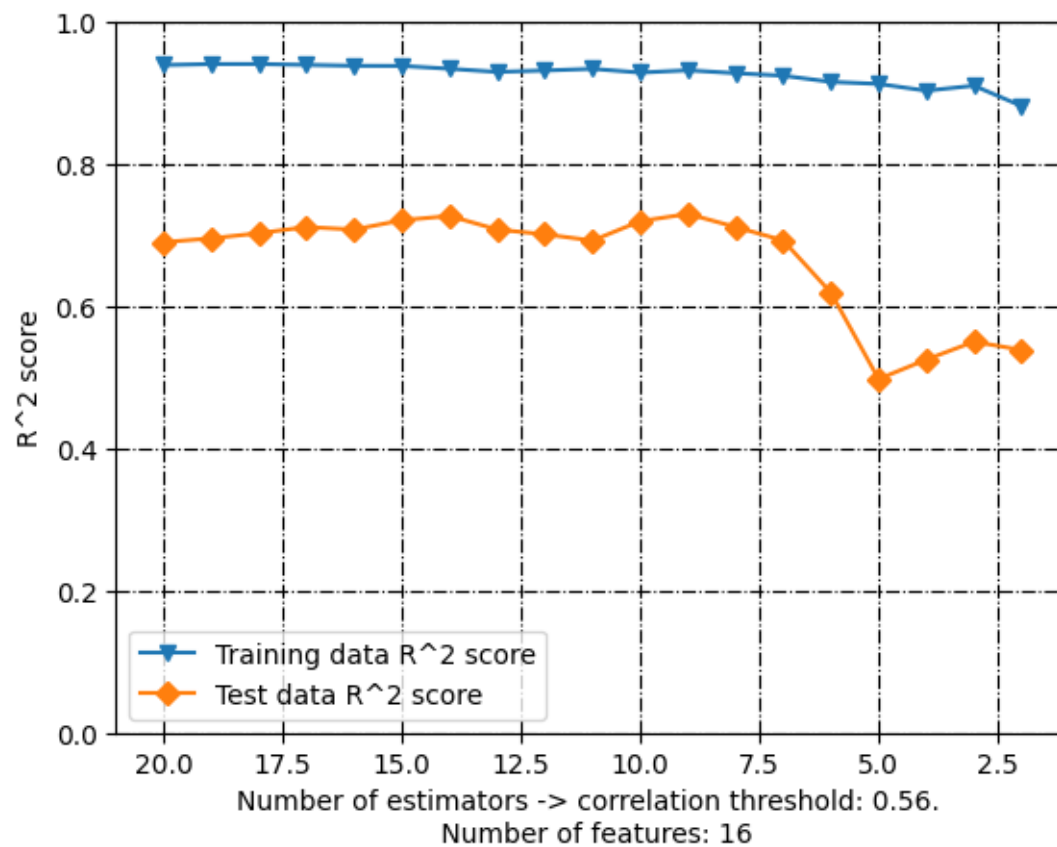

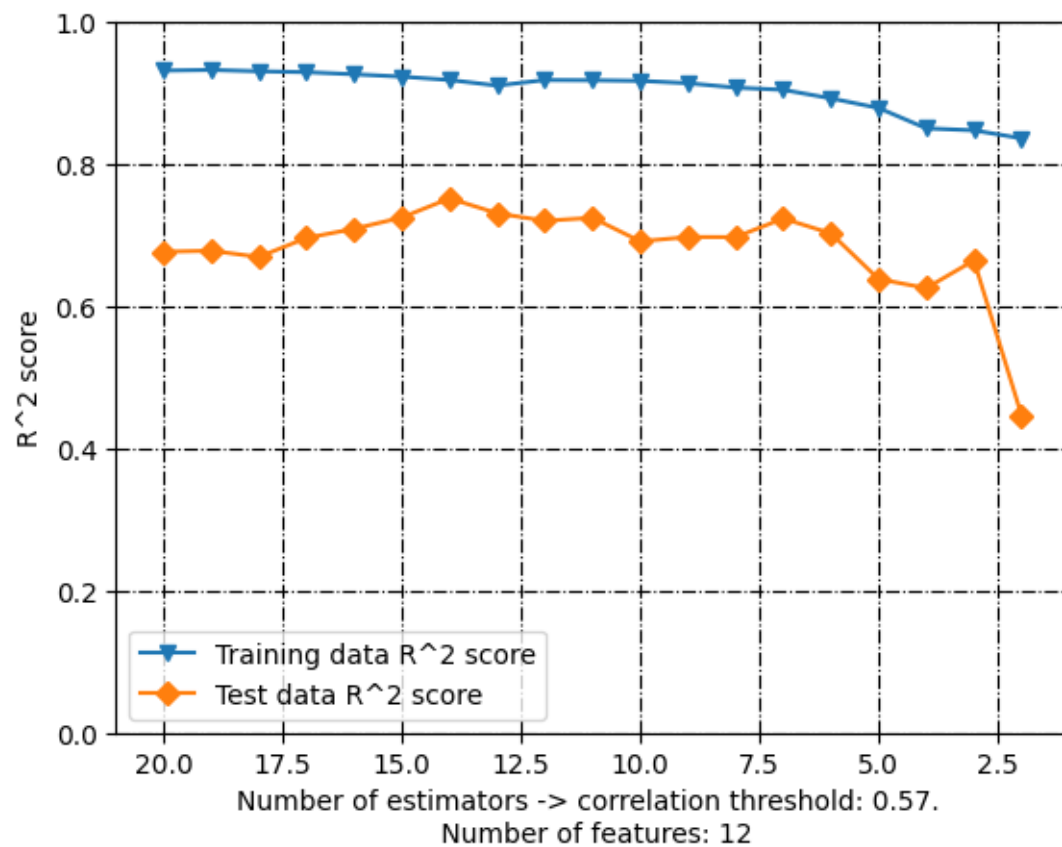

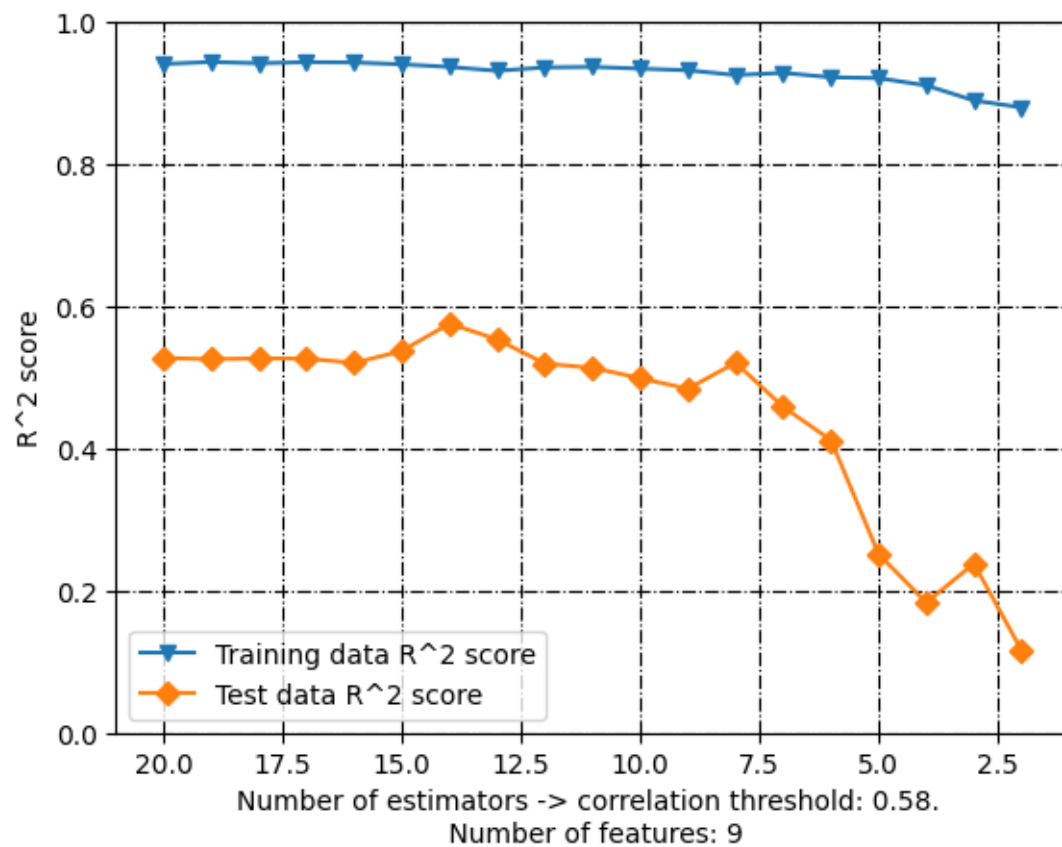



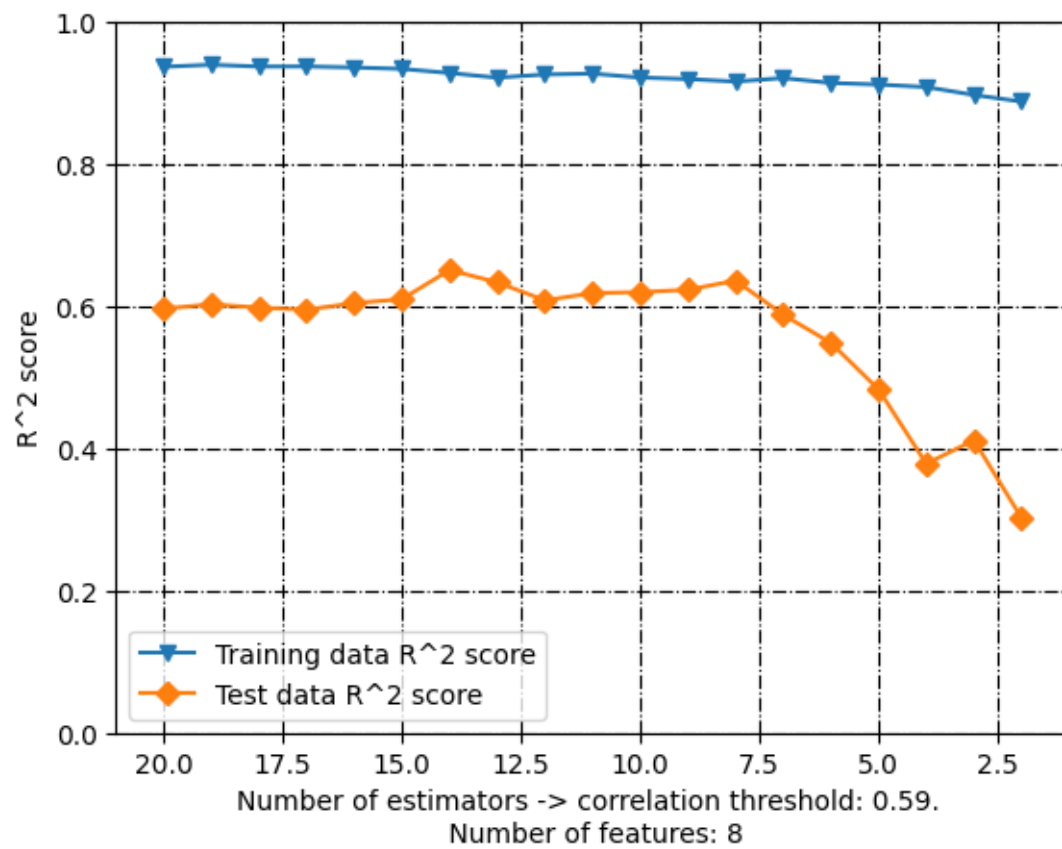

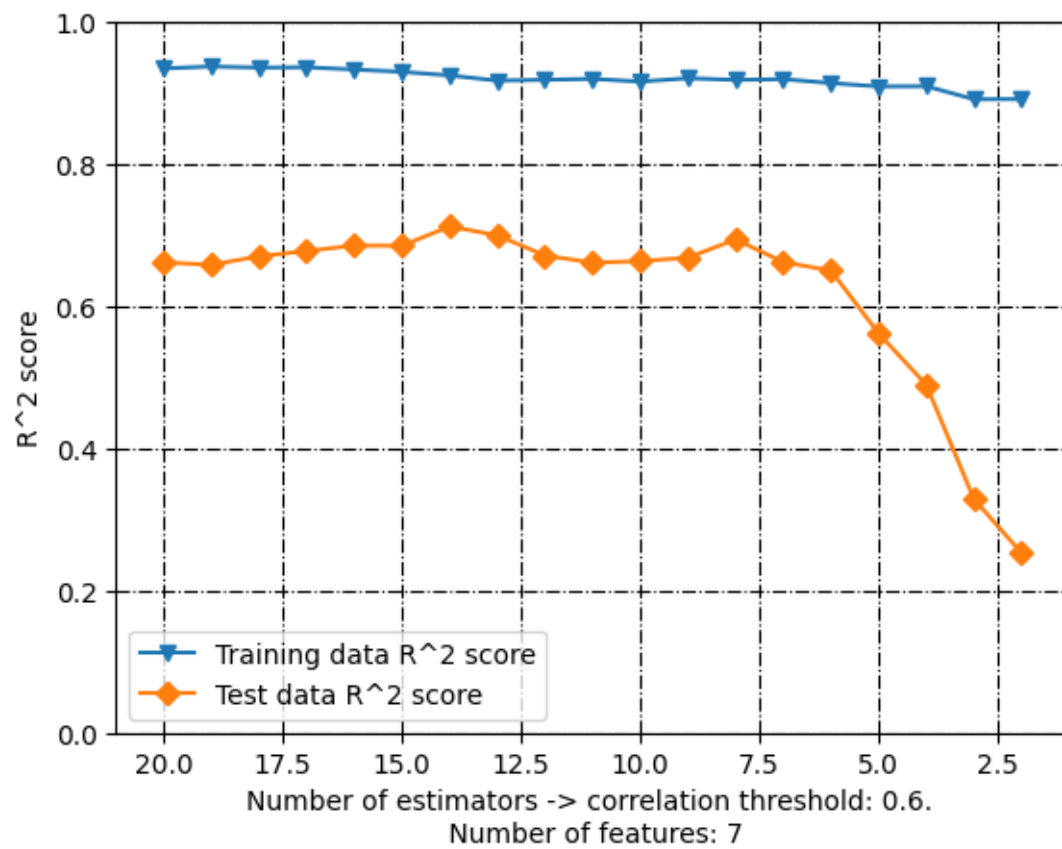

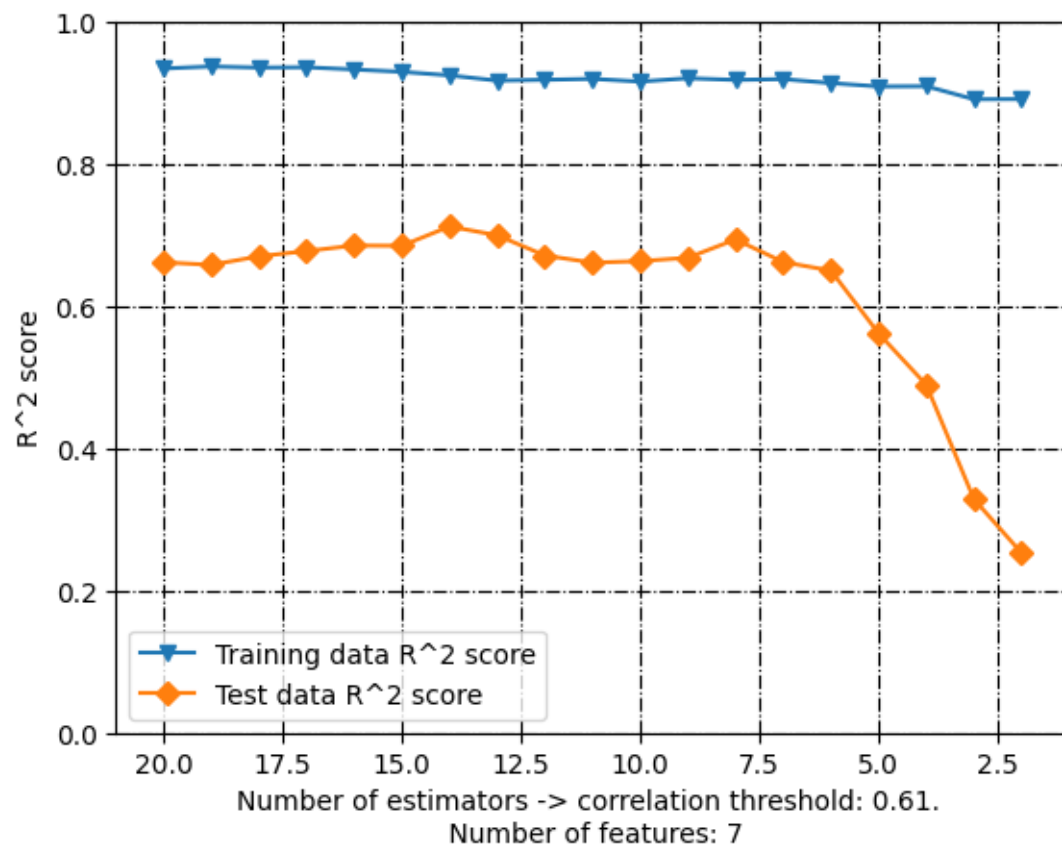

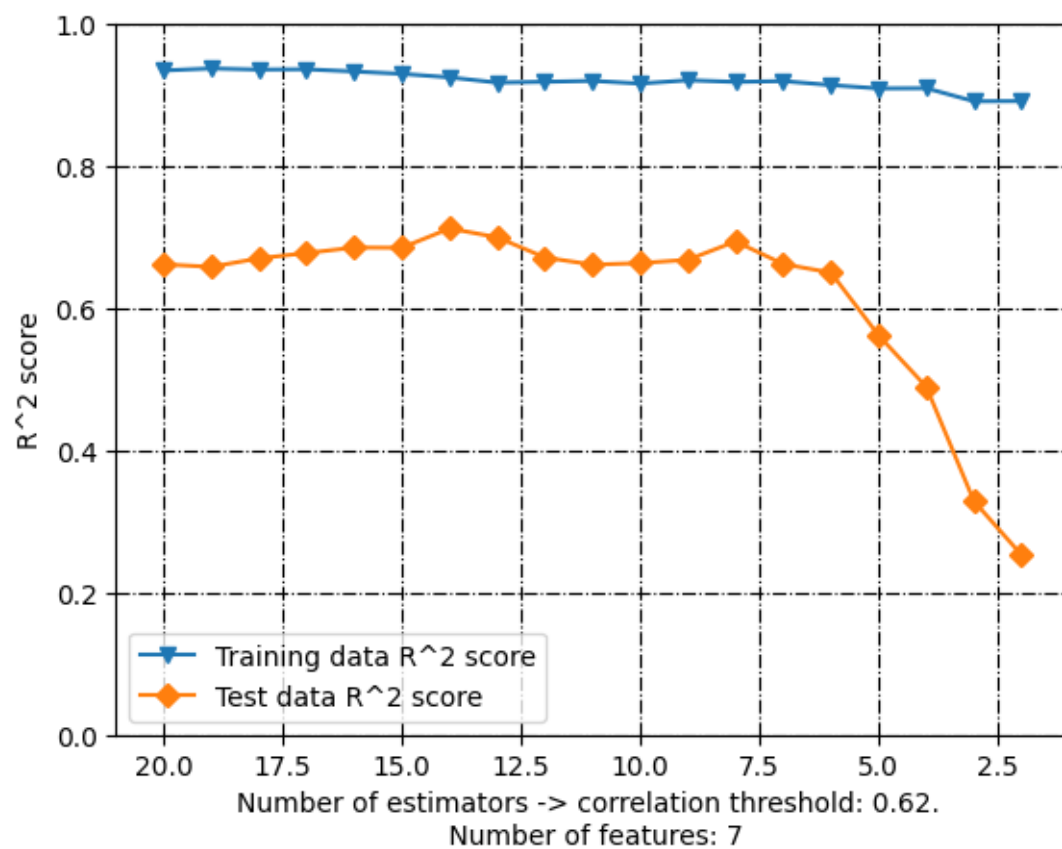

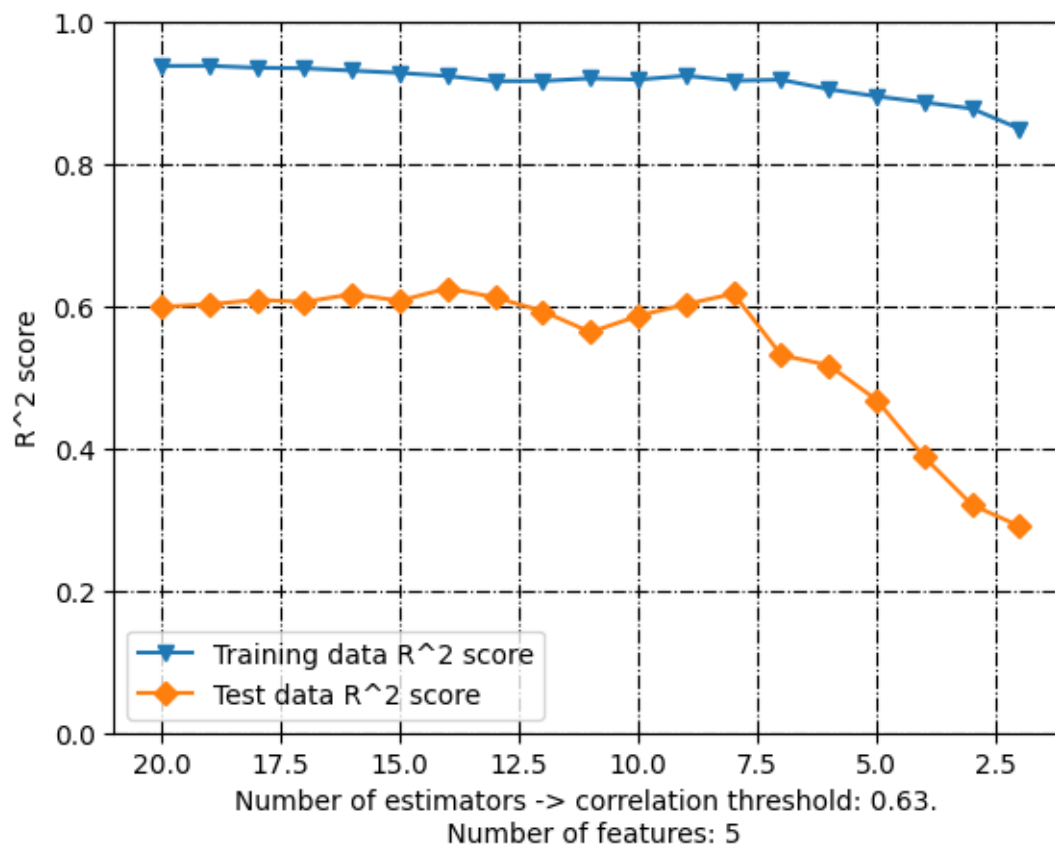

```
[29]: plt.plot(df_without_standardization['Correlation threshold'],  
             df_without_standardization['Number of features'], label = "Number of  
             features", marker='.')  
plt.legend()  
plt.xlabel('Correlation threshold')  
plt.ylabel('Number of features')  
plt.show()
```



[ ]:

## 4 KNeighborsRegressor

```
[30]: without_standardization, train_r2_, test_r2_, hist1, hist2, target_column_name,
      ↪ training_data_RMSE, test_data_RMSE = pred_model.
      ↪ prepare_data_and_create_model(molecular_descriptors_df=data,
      ↪
      ↪         correlation_threshold=0.50,
      ↪
      ↪         standardization=False,
      ↪
      ↪         model_type='KNeighborsRegressor',
      ↪
      ↪         target_column_name = target,
      ↪
      ↪         random_state=random_state,
      ↪
      ↪         train_test_split_=True,
```



verbose=True)



I am not doing standardization...

```
molecular descriptor name
0          AATSOZ
1          AATSOare
2          AATSOd
3          AATSOdv
4          AATSOi
molecular descriptor name  corr_value
0          AATSOZ          0.018677
1          AATSOare        -0.341313
2          AATSOd          -0.123443
3          AATSOdv         -0.265670
4          AATSOi          -0.428929
molecular descriptor name  corr_value  absolute correlation value
0          AATSOZ          0.018677          0.018677
1          AATSOare        -0.341313          0.341313
2          AATSOd          -0.123443          0.123443
3          AATSOdv         -0.265670          0.265670
4          AATSOi          -0.428929          0.428929
molecular descriptor name  corr_value  absolute correlation value
15          AATS1i         -0.561620          0.561620
113         AATSC1c         0.565682          0.565682
125         AATSC2c        -0.543393          0.543393
221         AETA_eta_R     -0.515778          0.515778
224         AMID_C         0.532458          0.532458
molecular descriptor name  corr_value  absolute correlation value
15          AATS1i         -0.561620          0.561620
113         AATSC1c         0.565682          0.565682
125         AATSC2c        -0.543393          0.543393
221         AETA_eta_R     -0.515778          0.515778
224         AMID_C         0.532458          0.532458
The model used is: KNeighbors...
Return the coefficient of determination of the prediction:
0.05856826531689907
R^2 score: 0.6184964356115292
Correlation coefficient: 0.7864454435061146
Test data - unseen during training:
R^2 score: 0.05856826531689907
Correlation coefficient: 0.24200881247776715
[6.82235873 7.12934979 7.73367122 5.58412315 6.15570254 5.85942708
 5.90869339 6.16889939 6.92897264 7.13379421 5.37489126 6.07997088
 7.54260641 7.55618984 7.12934979 6.19135085]
114      6.026872
10       7.856985
4        7.109020
```

```
95      5.200659
111     6.853872
79      6.327902
44      7.638272
47      7.022276
107     6.000000
11      7.250264
61      5.481486
56      6.657577
0       7.260428
92      7.141463
18      6.630970
78      6.244125
```

```
Name: LoVo/DX, dtype: float64
```

```
Training Root Mean Square Error: 0.5939513507247756
```

```
Testing Root Mean Square Error: 0.7004653712674876
```

```
File "C:\Users\aleks\anaconda3\envs\cheminf_gpu\lib\site-
packages\joblib\externals\loky\backend\context.py", line 217, in
_count_physical_cores
    raise ValueError(
```

```
[31]: print(target_column_name+str('_transformed'))
      print(hist1[target_column_name].hist())
```

```
LoVo/DX_transformed
```

```
AxesSubplot(0.125,0.11;0.775x0.77)
```





```
[32]: with_standardization, train_r2_, test_r2_, hist1, hist2, target_column_name,
      ↪ training_data_RMSE, test_data_RMSE = pred_model.
      ↪ prepare_data_and_create_model(molecular_descriptors_df=data,
      ↪
      ↪         correlation_threshold=0.50,
      ↪
      ↪         standardization=True,
      ↪
      ↪         model_type='KNeighborsRegressor',
      ↪
      ↪         target_column_name = target,
      ↪
      ↪         random_state=random_state,
      ↪
      ↪         train_test_split_=True,
      ↪
      ↪         verbose=True)
```

I am doing standardization...

|   | molecular descriptor name |
|---|---------------------------|
| 0 | AATS0Z                    |
| 1 | AATS0are                  |

```

2          AATS0d
3          AATS0dv
4          AATS0i
molecular descriptor name  corr_value
0          AATS0Z      0.018677
1          AATS0are    -0.341313
2          AATS0d      -0.123443
3          AATS0dv     -0.265670
4          AATS0i      -0.428929
molecular descriptor name  corr_value  absolute correlation value
0          AATS0Z      0.018677      0.018677
1          AATS0are    -0.341313      0.341313
2          AATS0d      -0.123443      0.123443
3          AATS0dv     -0.265670      0.265670
4          AATS0i      -0.428929      0.428929
molecular descriptor name  corr_value  absolute correlation value
15         AATS1i      -0.561620      0.561620
113        AATSC1c      0.565682      0.565682
125        AATSC2c     -0.543393      0.543393
221        AETA_eta_R  -0.515778      0.515778
224        AMID_C      0.532458      0.532458
molecular descriptor name  corr_value  absolute correlation value
15         AATS1i      -0.561620      0.561620
113        AATSC1c      0.565682      0.565682
125        AATSC2c     -0.543393      0.543393
221        AETA_eta_R  -0.515778      0.515778
224        AMID_C      0.532458      0.532458
The model used is: KNeighbors...
Return the coefficient of determination of the prediction:
0.05856826531689907
R^2 score: 0.6184964356115292
Correlation coefficient: 0.7864454435061146
Test data - unseen during training:
R^2 score: 0.05856826531689907
Correlation coefficient: 0.24200881247776715
[6.82235873 7.12934979 7.73367122 5.58412315 6.15570254 5.85942708
 5.90869339 6.16889939 6.92897264 7.13379421 5.37489126 6.07997088
 7.54260641 7.55618984 7.12934979 6.19135085]
114      6.026872
10       7.856985
4        7.109020
95       5.200659
111      6.853872
79       6.327902
44       7.638272
47       7.022276
107      6.000000
11       7.250264

```

```

61      5.481486
56      6.657577
0       7.260428
92      7.141463
18      6.630970
78      6.244125
Name: LoVo/DX, dtype: float64
Training Root Mean Square Error: 0.5939513507247756
Testing Root Mean Square Error: 0.7004653712674876

```

## 4.1 Search inside correlation space

```

[33]: step = 0.01
initial_step = corr_low
last_step = corr_high
first_list = [x / 100.0 for x in range(int(initial_step*100),
    ↪int(last_step*100), int(step*100))]
second_list = []
third_list = []
fourth_l = []
fifth_l = []
f_list = []
for i in first_list:
    without_standardization, train_r2, test_r2, _, h_, target_column_name,
    ↪training_data_RMSE, test_data_RMSE = pred_model.
    ↪prepare_data_and_create_model(molecular_descriptors_df = data,

    ↪                                correlation_threshold = i,

    ↪                                standardization = False,

    ↪                                model_type = 'KNeighborsRegressor',

    ↪                                target_column_name = target,

    ↪                                random_state=random_state,

    ↪                                train_test_split_ = True,

    ↪                                verbose = False)
    second_list.append(train_r2)
    third_list.append(test_r2)
    fourth_l.append(training_data_RMSE)
    fifth_l.append(test_data_RMSE)
    f_list.append(len(h_))

```

```
[34]: df_without_standardization = pd.DataFrame(data=first_list,
        ↪columns=["Correlation threshold"])
df_without_standardization['Training data R^2 score'] = second_list
df_without_standardization['Test data R^2 score'] = third_list
df_without_standardization['Training RMSE'] = fourth_l
df_without_standardization['Test RMSE'] = fifth_l
df_without_standardization['Number of features'] = f_list
```

```
[35]: df_k_nearest = df_without_standardization.copy()
df_without_standardization
```

```
[35]:
```

|    | Correlation threshold | Training data R^2 score | Test data R^2 score | \ |
|----|-----------------------|-------------------------|---------------------|---|
| 0  | 0.33                  | 0.480062                | 0.145765            |   |
| 1  | 0.34                  | 0.412171                | -0.066844           |   |
| 2  | 0.35                  | 0.401596                | 0.070421            |   |
| 3  | 0.36                  | 0.422658                | -0.068587           |   |
| 4  | 0.37                  | 0.422658                | -0.068587           |   |
| 5  | 0.38                  | 0.462916                | 0.053687            |   |
| 6  | 0.39                  | 0.458547                | 0.034140            |   |
| 7  | 0.40                  | 0.517999                | -0.034205           |   |
| 8  | 0.41                  | 0.502621                | -0.073159           |   |
| 9  | 0.42                  | 0.480991                | -0.167617           |   |
| 10 | 0.43                  | 0.450518                | -0.056833           |   |
| 11 | 0.44                  | 0.443118                | -0.077436           |   |
| 12 | 0.45                  | 0.428702                | -0.133871           |   |
| 13 | 0.46                  | 0.443945                | -0.146117           |   |
| 14 | 0.47                  | 0.431520                | -0.074632           |   |
| 15 | 0.48                  | 0.585454                | 0.058735            |   |
| 16 | 0.49                  | 0.584182                | 0.057129            |   |
| 17 | 0.50                  | 0.618496                | 0.058568            |   |
| 18 | 0.51                  | 0.600802                | 0.094756            |   |
| 19 | 0.52                  | 0.600802                | 0.138583            |   |
| 20 | 0.53                  | 0.630536                | 0.301029            |   |
| 21 | 0.54                  | 0.627198                | 0.340326            |   |
| 22 | 0.55                  | 0.646752                | 0.453592            |   |
| 23 | 0.56                  | 0.649685                | 0.556457            |   |
| 24 | 0.57                  | 0.633248                | 0.414463            |   |
| 25 | 0.58                  | 0.625208                | 0.336490            |   |
| 26 | 0.59                  | 0.625089                | 0.336490            |   |
| 27 | 0.60                  | 0.637140                | 0.391318            |   |
| 28 | 0.61                  | 0.637140                | 0.391318            |   |
| 29 | 0.62                  | 0.637140                | 0.391318            |   |
| 30 | 0.63                  | 0.657269                | 0.318851            |   |

  

|   | Training RMSE | Test RMSE | Number of features |
|---|---------------|-----------|--------------------|
| 0 | 0.693390      | 0.667238  | 527                |
| 1 | 0.737271      | 0.745663  | 512                |

|    |          |          |     |
|----|----------|----------|-----|
| 2  | 0.743873 | 0.696042 | 487 |
| 3  | 0.730665 | 0.746272 | 455 |
| 4  | 0.730665 | 0.746272 | 435 |
| 5  | 0.704730 | 0.702279 | 399 |
| 6  | 0.707591 | 0.709495 | 377 |
| 7  | 0.667614 | 0.734168 | 343 |
| 8  | 0.678180 | 0.747867 | 290 |
| 9  | 0.692770 | 0.780086 | 245 |
| 10 | 0.712817 | 0.742157 | 203 |
| 11 | 0.717601 | 0.749356 | 143 |
| 12 | 0.726830 | 0.768730 | 111 |
| 13 | 0.717068 | 0.772870 | 94  |
| 14 | 0.725035 | 0.748380 | 83  |
| 15 | 0.619139 | 0.700403 | 69  |
| 16 | 0.620088 | 0.701000 | 60  |
| 17 | 0.593951 | 0.700465 | 50  |
| 18 | 0.607569 | 0.686871 | 46  |
| 19 | 0.607569 | 0.670037 | 41  |
| 20 | 0.584504 | 0.603562 | 32  |
| 21 | 0.587139 | 0.586350 | 25  |
| 22 | 0.571533 | 0.533643 | 21  |
| 23 | 0.569155 | 0.480795 | 16  |
| 24 | 0.582355 | 0.552420 | 12  |
| 25 | 0.588704 | 0.588052 | 9   |
| 26 | 0.588797 | 0.588052 | 8   |
| 27 | 0.579257 | 0.563232 | 7   |
| 28 | 0.579257 | 0.563232 | 7   |
| 29 | 0.579257 | 0.563232 | 7   |
| 30 | 0.562961 | 0.595817 | 5   |

## 4.2 Plots

```
[36]: plt.plot(df_without_standardization['Correlation threshold'],
             df_without_standardization['Training data R^2 score'], label = "Training
             data R^2 score", marker='v')
plt.plot(df_without_standardization['Correlation threshold'],
             df_without_standardization['Test data R^2 score'], label = "Test data R^2
             score", marker='D')
plt.legend()
plt.xlabel('Correlation threshold')
plt.ylabel('R^2 score')
plt.ylim([0, 1])
plt.show()
```

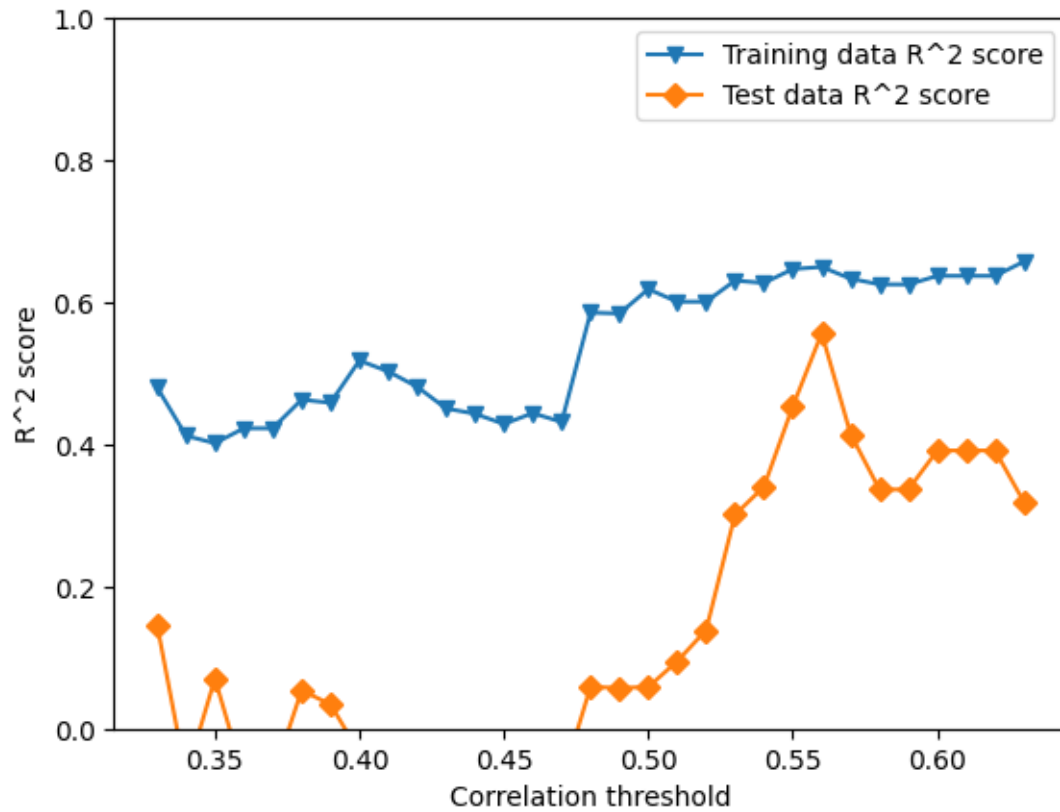

```
[37]: plt.plot(df_without_standardization['Correlation threshold'],
             df_without_standardization['Number of features'], label = "Number of
             features", marker='.')
plt.legend()
plt.xlabel('Correlation threshold')
plt.ylabel('Number of features')
plt.show()
```



[ ]:

## 5 Support Vector Machines (SVM)

```
[38]: without_standardization, train_r2_, test_r2_, hist1, hist2, target_column_name,
      ↪ training_data_RMSE, test_data_RMSE = pred_model.
      ↪ prepare_data_and_create_model(molecular_descriptors_df=data,
      ↪
      ↪         correlation_threshold=0.50,
      ↪
      ↪         standardization=False,
      ↪
      ↪         model_type='SVR',
      ↪
      ↪         kernel_ = 'linear',
      ↪
      ↪         gamma_ = 'auto',
      ↪
      ↪         target_column_name = target,
```

```

↪          random_state=random_state,
↪          train_test_split_=True,
↪          verbose=True)

```

I am not doing standardization...

|   | molecular descriptor name |  |
|---|---------------------------|--|
| 0 | AATSOZ                    |  |
| 1 | AATSOare                  |  |
| 2 | AATSOd                    |  |
| 3 | AATSOdv                   |  |
| 4 | AATSOi                    |  |

  

|   | molecular descriptor name | corr_value |
|---|---------------------------|------------|
| 0 | AATSOZ                    | 0.018677   |
| 1 | AATSOare                  | -0.341313  |
| 2 | AATSOd                    | -0.123443  |
| 3 | AATSOdv                   | -0.265670  |
| 4 | AATSOi                    | -0.428929  |

  

|   | molecular descriptor name | corr_value | absolute correlation value |
|---|---------------------------|------------|----------------------------|
| 0 | AATSOZ                    | 0.018677   | 0.018677                   |
| 1 | AATSOare                  | -0.341313  | 0.341313                   |
| 2 | AATSOd                    | -0.123443  | 0.123443                   |
| 3 | AATSOdv                   | -0.265670  | 0.265670                   |
| 4 | AATSOi                    | -0.428929  | 0.428929                   |

  

|     | molecular descriptor name | corr_value | absolute correlation value |
|-----|---------------------------|------------|----------------------------|
| 15  | AATS1i                    | -0.561620  | 0.561620                   |
| 113 | AATSC1c                   | 0.565682   | 0.565682                   |
| 125 | AATSC2c                   | -0.543393  | 0.543393                   |
| 221 | AETA_eta_R                | -0.515778  | 0.515778                   |
| 224 | AMID_C                    | 0.532458   | 0.532458                   |

  

|     | molecular descriptor name | corr_value | absolute correlation value |
|-----|---------------------------|------------|----------------------------|
| 15  | AATS1i                    | -0.561620  | 0.561620                   |
| 113 | AATSC1c                   | 0.565682   | 0.565682                   |
| 125 | AATSC2c                   | -0.543393  | 0.543393                   |
| 221 | AETA_eta_R                | -0.515778  | 0.515778                   |
| 224 | AMID_C                    | 0.532458   | 0.532458                   |

The model used is: SVR...

Return the coefficient of determination of the prediction:

-0.7067065714648701

R<sup>2</sup> score: 0.22680272300596427

Correlation coefficient: 0.47623809487058494

Test data - unseen during training:

R<sup>2</sup> score: -0.7067065714648701

Correlation coefficient: nan

[5.3191818 7.54606786 7.10433139 6.35575272 4.201683 5.89553052



```

7.33731032 7.41729643 6.12151933 7.25899662 3.93371874 6.45051427
7.60104524 7.71508202 7.42855583 5.10483484]
114      6.026872
10       7.856985
4        7.109020
95       5.200659
111      6.853872
79       6.327902
44       7.638272
47       7.022276
107      6.000000
11       7.250264
61       5.481486
56       6.657577
0        7.260428
92       7.141463
18       6.630970
78       6.244125

```

Name: LoVo/DX, dtype: float64

Training Root Mean Square Error: 0.8455644823555171

Testing Root Mean Square Error: 0.9431302691442349

```

[39]: print(target_column_name+str('_transformed'))
      print(hist1[target_column_name].hist())

```

LoVo/DX\_transformed

AxesSubplot(0.125,0.11;0.775x0.77)



```
[40]: with_standardization, train_r2_, test_r2_, hist1, hist2, target_column_name,
      ↪ training_data_RMSE, test_data_RMSE = pred_model.
      ↪ prepare_data_and_create_model(molecular_descriptors_df=data,
      ↪
      ↪         correlation_threshold=0.50,
      ↪
      ↪         standardization=True,
      ↪
      ↪         model_type='SVR',
      ↪
      ↪         kernel_ = 'linear',
      ↪
      ↪         gamma_ = 'auto',
      ↪
      ↪         target_column_name = target,
      ↪
      ↪         random_state=random_state,
      ↪
      ↪         train_test_split_=True,
      ↪
      ↪         verbose=True)
```

I am doing standardization...

molecular descriptor name

0 AATSOZ

1 AATSOare

2 AATSOd

3 AATSOdv

4 AATSOi

molecular descriptor name corr\_value

0 AATSOZ 0.018677

1 AATSOare -0.341313

2 AATSOd -0.123443

3 AATSOdv -0.265670

4 AATSOi -0.428929

molecular descriptor name corr\_value absolute correlation value

0 AATSOZ 0.018677 0.018677

1 AATSOare -0.341313 0.341313

2 AATSOd -0.123443 0.123443

3 AATSOdv -0.265670 0.265670

4 AATSOi -0.428929 0.428929

molecular descriptor name corr\_value absolute correlation value

15 AATS1i -0.561620 0.561620

113 AATSC1c 0.565682 0.565682

125 AATSC2c -0.543393 0.543393

221 AETA\_eta\_R -0.515778 0.515778

224 AMID\_C 0.532458 0.532458

molecular descriptor name corr\_value absolute correlation value

15 AATS1i -0.561620 0.561620

113 AATSC1c 0.565682 0.565682

125 AATSC2c -0.543393 0.543393

221 AETA\_eta\_R -0.515778 0.515778

224 AMID\_C 0.532458 0.532458

The model used is: SVR...

Return the coefficient of determination of the prediction:

-0.7067065714648701

R<sup>2</sup> score: 0.22680272300596427

Correlation coefficient: 0.47623809487058494

Test data - unseen during training:

R<sup>2</sup> score: -0.7067065714648701

Correlation coefficient: nan

[5.3191818 7.54606786 7.10433139 6.35575272 4.201683 5.89553052

7.33731032 7.41729643 6.12151933 7.25899662 3.93371874 6.45051427

7.60104524 7.71508202 7.42855583 5.10483484]

114 6.026872

10 7.856985

4 7.109020

95 5.200659

111 6.853872

79 6.327902

```

44      7.638272
47      7.022276
107     6.000000
11      7.250264
61      5.481486
56      6.657577
0       7.260428
92      7.141463
18      6.630970
78      6.244125

```

Name: LoVo/DX, dtype: float64

Training Root Mean Square Error: 0.8455644823555171

Testing Root Mean Square Error: 0.9431302691442349

## 5.1 Search inside correlation space

```

[41]: step = 0.01
      initial_step = corr_low
      last_step = corr_high
      first_list = [x / 100.0 for x in range(int(initial_step*100),
      ↪int(last_step*100), int(step*100))]
      second_list = []
      third_list = []
      fourth_l = []
      fifth_l = []
      f_list = []
      for i in first_list:
          without_standardization, train_r2, test_r2, _, h_, target_column_name,
          ↪training_data_RMSE, test_data_RMSE = pred_model.
          ↪prepare_data_and_create_model(molecular_descriptors_df = data,

          ↪correlation_threshold = i,

          ↪standardization = False,

          ↪model_type = 'SVR',

          ↪kernel_ = 'linear',

          ↪gamma_ = 'auto',

          ↪target_column_name = target,

          ↪random_state=random_state,

          ↪train_test_split_ = True,

```

```

        verbose = False)
    second_list.append(train_r2)
    third_list.append(test_r2)
    fourth_l.append(training_data_RMSE)
    fifth_l.append(test_data_RMSE)
    f_list.append(len(h_))

```

```

[42]: df_without_standardization = pd.DataFrame(data=first_list,
        ↪columns=["Correlation threshold"])
df_without_standardization['Training data R^2 score'] = second_list
df_without_standardization['Test data R^2 score'] = third_list
df_without_standardization['Training RMSE'] = fourth_l
df_without_standardization['Test RMSE'] = fifth_l
df_without_standardization['Number of features'] = f_list

```

```

[43]: df_svm = df_without_standardization.copy()
df_without_standardization

```

```

[43]:
Correlation threshold  Training data R^2 score  Test data R^2 score  \
0                    0.33          -3.967545e+06          -6.177944e+07
1                    0.34          -4.359720e+06          -1.763906e+07
2                    0.35          -4.169933e+06          -3.135337e+07
3                    0.36          -1.210090e+06          -1.721176e+07
4                    0.37          -1.031800e+06          -8.514192e+06
5                    0.38          -5.106398e+05          -1.623426e+06
6                    0.39          -4.992480e+05          -3.513337e+06
7                    0.40          -5.440960e+05          -1.187364e+07
8                    0.41          -2.560265e+05          -2.512385e+06
9                    0.42          -2.066783e+04          -1.002979e+05
10                   0.43          -1.392983e+04          -9.535859e+04
11                   0.44          -7.364753e+03          -2.221438e+04
12                   0.45          -1.139863e+04          -1.808719e+04
13                   0.46          -3.150243e+03          -2.527648e+04
14                   0.47          -3.908323e+03          -8.513583e+03
15                   0.48           1.550025e-01          -1.923098e+00
16                   0.49           1.518758e-01           1.193246e-01
17                   0.50           2.268027e-01          -7.067066e-01
18                   0.51           4.583327e-01          -6.995039e-01
19                   0.52           3.393138e-01           4.226412e-01
20                   0.53           6.062191e-01           5.354107e-01
21                   0.54           5.985621e-01           4.243816e-01
22                   0.55           5.913989e-01           4.135849e-01
23                   0.56           5.488128e-01           5.954298e-01
24                   0.57           5.307889e-01           6.487816e-01
25                   0.58           5.214640e-01           6.413845e-01
26                   0.59           5.185136e-01           6.367159e-01

```

|    |      |              |              |
|----|------|--------------|--------------|
| 27 | 0.60 | 4.984544e-01 | 6.327069e-01 |
| 28 | 0.61 | 4.984544e-01 | 6.327069e-01 |
| 29 | 0.62 | 4.984544e-01 | 6.327069e-01 |
| 30 | 0.63 | 4.852199e-01 | 6.049489e-01 |

|    | Training RMSE | Test RMSE   | Number of features |
|----|---------------|-------------|--------------------|
| 0  | 1915.413525   | 5674.325327 | 527                |
| 1  | 2007.848476   | 3032.005082 | 512                |
| 2  | 1963.659483   | 4042.354371 | 487                |
| 3  | 1057.817080   | 2995.055521 | 455                |
| 4  | 976.786094    | 2106.512288 | 435                |
| 5  | 687.162275    | 919.832376  | 399                |
| 6  | 679.454180    | 1353.169588 | 377                |
| 7  | 709.315950    | 2487.620905 | 343                |
| 8  | 486.569522    | 1144.288300 | 290                |
| 9  | 138.248198    | 228.633766  | 245                |
| 10 | 113.498503    | 222.933045  | 203                |
| 11 | 82.529679     | 107.601689  | 143                |
| 12 | 102.670798    | 97.093419   | 111                |
| 13 | 53.981198     | 114.778130  | 94                 |
| 14 | 60.124619     | 66.615293   | 83                 |
| 15 | 0.883953      | 1.234281    | 69                 |
| 16 | 0.885587      | 0.677486    | 60                 |
| 17 | 0.845564      | 0.943130    | 50                 |
| 18 | 0.707730      | 0.941138    | 46                 |
| 19 | 0.781626      | 0.548549    | 41                 |
| 20 | 0.603433      | 0.492070    | 32                 |
| 21 | 0.609271      | 0.547721    | 25                 |
| 22 | 0.614683      | 0.552834    | 21                 |
| 23 | 0.645922      | 0.459187    | 16                 |
| 24 | 0.658697      | 0.427840    | 12                 |
| 25 | 0.665210      | 0.432321    | 9                  |
| 26 | 0.667258      | 0.435126    | 8                  |
| 27 | 0.681015      | 0.437521    | 7                  |
| 28 | 0.681015      | 0.437521    | 7                  |
| 29 | 0.681015      | 0.437521    | 7                  |
| 30 | 0.689942      | 0.453752    | 5                  |

## 5.2 Plots

```
[44]: plt.plot(df_without_standardization['Correlation threshold'],
             df_without_standardization['Training data R^2 score'], label = "Training
             data R^2 score", marker='v')
plt.plot(df_without_standardization['Correlation threshold'],
             df_without_standardization['Test data R^2 score'], label = "Test data R^2
             score", marker='D')
plt.legend()
```

```
plt.xlabel('Correlation threshold')
plt.ylabel('R^2 score')
plt.ylim([0, 1])
plt.show()
```

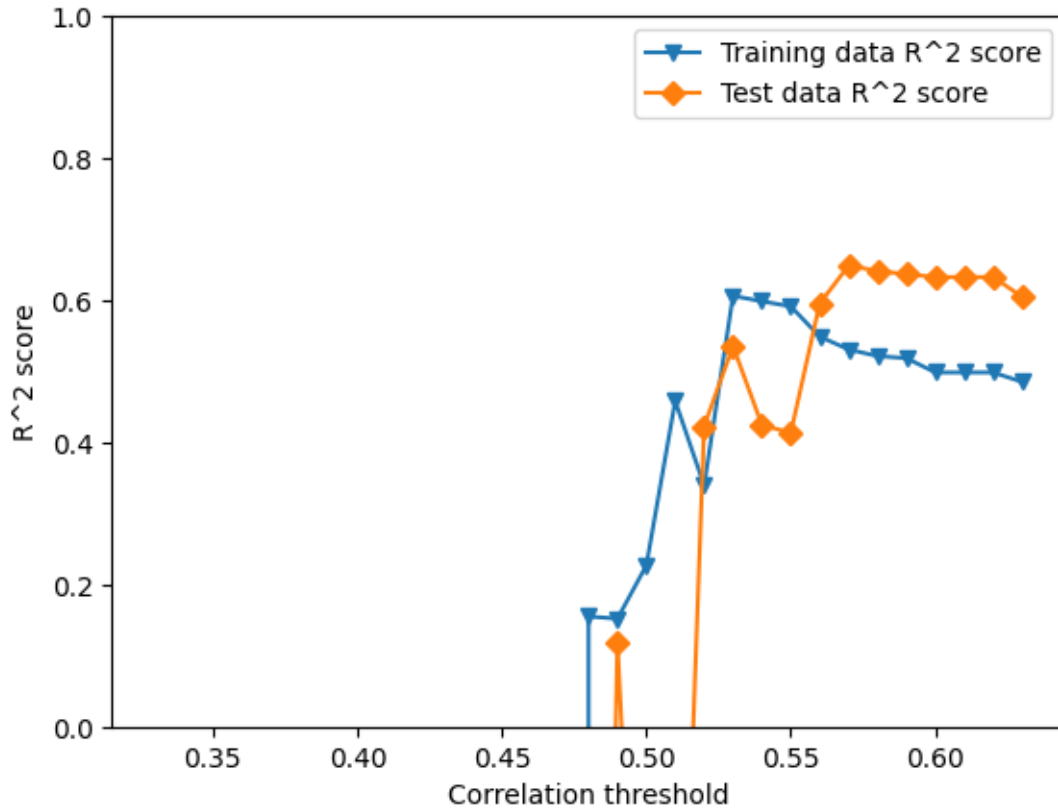

```
[45]: plt.plot(df_without_standardization['Correlation threshold'],  
             df_without_standardization['Number of features'], label = "Number of  
             features", marker='.')  
plt.legend()  
plt.xlabel('Correlation threshold')  
plt.ylabel('Number of features')  
plt.show()
```



### 5.3 Store quality measurements

```
[46]: with pd.ExcelWriter('../Data/Quality_'+ 'LoVo_DX' + '_' + str(random_state) + '_.'
      ↪ 'xlsx') as writer:
      df_linear.to_excel(writer, sheet_name='MLR')
      df_decision_tree.to_excel(writer, sheet_name='DT')
      df_random_forest.to_excel(writer, sheet_name='RF')
      df_k_nearest.to_excel(writer, sheet_name='KNN')
      df_svm.to_excel(writer, sheet_name='SVM')
```



# Notebook

January 18, 2024

## 1 File 24

```
[1]: import sys
from pathlib import Path
prediction_mode_path = Path("../module")
sys.path.append(prediction_mode_path.as_posix())
import models_creation as pred_model

import pandas as pd
import numpy as np

from sklearn.metrics import r2_score

import matplotlib.pyplot as plt
from sklearn.tree import plot_tree

from matplotlib import pyplot as plt

import joblib

import warnings
warnings.filterwarnings('ignore')
```

```
[2]: load_prepared_data = pd.read_excel('../Data/Kolchicyna_machine_learning.xlsx')
load_prepared_data = load_prepared_data.drop(columns=['Unnamed: 0'])

target = 'LoVo'

corr_low = 0.33
corr_high = 0.55

random_state = 15
```

```
[3]: load_prepared_data.head()
```

```
[3]:      AATSOZ  AATSOare  AATSOd  AATSOdv  AATSOi  AATSOm  AATSOp  \
0  25.090909  6.046518  3.109091  6.662626  160.775045  99.075564  1.555512
1  24.448276  6.008422  3.051724  6.386973  161.021674  96.473315  1.538471
```

|   |           |          |          |          |            |           |          |
|---|-----------|----------|----------|----------|------------|-----------|----------|
| 2 | 23.868852 | 5.974074 | 3.000000 | 6.138434 | 161.244045 | 94.127025 | 1.523105 |
| 3 | 23.868852 | 5.974074 | 3.032787 | 6.171220 | 161.244045 | 94.127025 | 1.523105 |
| 4 | 23.343750 | 5.942945 | 2.953125 | 5.913194 | 161.445569 | 92.000700 | 1.509180 |

|   | AATS0pe  | AATS0s   | AATS0se  | ... | A549_float | MCF-7_float | LoVo_float | \ |
|---|----------|----------|----------|-----|------------|-------------|------------|---|
| 0 | 6.126680 | 3.435416 | 7.629859 | ... | 10.8       | 10.3        | 6.5        |   |
| 1 | 6.088791 | 3.330998 | 7.596891 | ... | 11.6       | 12.0        | 8.5        |   |
| 2 | 6.054630 | 3.236850 | 7.567166 | ... | 10.9       | 12.2        | 8.8        |   |
| 3 | 6.054630 | 3.257798 | 7.567166 | ... | 10.5       | 11.3        | 8.5        |   |
| 4 | 6.023670 | 3.151529 | 7.540228 | ... | 89.5       | 92.7        | 52.8       |   |

|   | LoVo/DX_float | BALB/3T3_float | A549_float_transformed | \ |
|---|---------------|----------------|------------------------|---|
| 0 | 54.9          | 10.2           | 7.966576               |   |
| 1 | 31.1          | 14.3           | 7.935542               |   |
| 2 | 17.9          | 11.7           | 7.962574               |   |
| 3 | 10.2          | 11.0           | 7.978811               |   |
| 4 | 77.8          | 99.4           | 7.048177               |   |

|   | MCF-7_float_transformed | LoVo_float_transformed | LoVo/DX_float_transformed | \ |
|---|-------------------------|------------------------|---------------------------|---|
| 0 | 7.987163                | 8.187087               | 7.260428                  |   |
| 1 | 7.920819                | 8.070581               | 7.507240                  |   |
| 2 | 7.913640                | 8.055517               | 7.747147                  |   |
| 3 | 7.946922                | 8.070581               | 7.991400                  |   |
| 4 | 7.032920                | 7.277366               | 7.109020                  |   |

|   | BALB/3T3_float_transformed |
|---|----------------------------|
| 0 | 7.991400                   |
| 1 | 7.844664                   |
| 2 | 7.931814                   |
| 3 | 7.958607                   |
| 4 | 7.002614                   |

[5 rows x 1221 columns]

```
[4]: data = load_prepared_data[list(load_prepared_data.columns)[0:-10]]
data[target] = load_prepared_data[load_prepared_data.columns[-3]]
data.head()
```

|   | AATS0Z    | AATS0are | AATS0d   | AATS0dv  | AATS0i     | AATS0m    | AATS0p   | \ |
|---|-----------|----------|----------|----------|------------|-----------|----------|---|
| 0 | 25.090909 | 6.046518 | 3.109091 | 6.662626 | 160.775045 | 99.075564 | 1.555512 |   |
| 1 | 24.448276 | 6.008422 | 3.051724 | 6.386973 | 161.021674 | 96.473315 | 1.538471 |   |
| 2 | 23.868852 | 5.974074 | 3.000000 | 6.138434 | 161.244045 | 94.127025 | 1.523105 |   |
| 3 | 23.868852 | 5.974074 | 3.032787 | 6.171220 | 161.244045 | 94.127025 | 1.523105 |   |
| 4 | 23.343750 | 5.942945 | 2.953125 | 5.913194 | 161.445569 | 92.000700 | 1.509180 |   |

|   | AATS0pe  | AATS0s   | AATS0se  | ... | piPC10   | piPC2    | piPC3    | piPC4    | \ |
|---|----------|----------|----------|-----|----------|----------|----------|----------|---|
| 0 | 6.126680 | 3.435416 | 7.629859 | ... | 7.999655 | 4.266195 | 4.915408 | 5.516700 |   |

|   |          |          |          |     |          |          |          |          |
|---|----------|----------|----------|-----|----------|----------|----------|----------|
| 1 | 6.088791 | 3.330998 | 7.596891 | ... | 8.018726 | 4.280132 | 4.922714 | 5.520711 |
| 2 | 6.054630 | 3.236850 | 7.567166 | ... | 8.028799 | 4.293878 | 4.929967 | 5.524706 |
| 3 | 6.054630 | 3.257798 | 7.567166 | ... | 8.037440 | 4.307438 | 4.929967 | 5.524706 |
| 4 | 6.023670 | 3.151529 | 7.540228 | ... | 8.034892 | 4.307438 | 4.937168 | 5.528685 |

|   | piPC5    | piPC6    | piPC7    | piPC8    | piPC9    | LoVo     |
|---|----------|----------|----------|----------|----------|----------|
| 0 | 6.098566 | 6.595759 | 6.979116 | 7.337313 | 7.681445 | 8.187087 |
| 1 | 6.103048 | 6.601209 | 6.985613 | 7.349442 | 7.695531 | 8.070581 |
| 2 | 6.105281 | 6.603923 | 6.989306 | 7.353932 | 7.704023 | 8.055517 |
| 3 | 6.107510 | 6.606629 | 6.992068 | 7.361425 | 7.709420 | 8.070581 |
| 4 | 6.107510 | 6.605277 | 6.991148 | 7.356489 | 7.707175 | 7.277366 |

[5 rows x 1212 columns]

## 2 Multiple Linear regression (MLR)

```
[5]: without_standardization, train_r2_, test_r2_, hist1, hist2, target_column_name,
      ↪ training_data_RMSE, test_data_RMSE = pred_model.
      ↪ prepare_data_and_create_model(molecular_descriptors_df=data,
      ↪
      ↪ correlation_threshold=0.5,
      ↪
      ↪ standardization=False,
      ↪
      ↪ model_type='linear_model',
      ↪
      ↪ target_column_name = str(target),
      ↪
      ↪ random_state=random_state,
      ↪
      ↪ train_test_split_=True,
      ↪
      ↪ verbose=True)
```

I am not doing standardization...

|   | molecular descriptor name | corr_value |
|---|---------------------------|------------|
| 0 | AATS0Z                    | -0.027037  |
| 1 | AATS0are                  | -0.129823  |
| 2 | AATS0d                    | 0.042740   |
| 3 | AATS0dv                   | -0.120173  |

|      |                           |            |                            |
|------|---------------------------|------------|----------------------------|
| 4    | AATSOi                    | 0.132395   |                            |
|      | molecular descriptor name | corr_value | absolute correlation value |
| 0    | AATSOZ                    | -0.027037  | 0.027037                   |
| 1    | AATSOare                  | -0.129823  | 0.129823                   |
| 2    | AATSOd                    | 0.042740   | 0.042740                   |
| 3    | AATSOdv                   | -0.120173  | 0.120173                   |
| 4    | AATSOi                    | 0.132395   | 0.132395                   |
|      | molecular descriptor name | corr_value | absolute correlation value |
| 226  | AMID_0                    | -0.524157  | 0.524157                   |
| 505  | EState_VSA5               | -0.579664  | 0.579664                   |
| 791  | MDEO-12                   | -0.558727  | 0.558727                   |
| 851  | NdssC                     | -0.506855  | 0.506855                   |
| 1091 | VSA_EState5               | 0.503578   | 0.503578                   |
|      | molecular descriptor name | corr_value | absolute correlation value |
| 226  | AMID_0                    | -0.524157  | 0.524157                   |
| 505  | EState_VSA5               | -0.579664  | 0.579664                   |
| 791  | MDEO-12                   | -0.558727  | 0.558727                   |
| 851  | NdssC                     | -0.506855  | 0.506855                   |
| 1091 | VSA_EState5               | 0.503578   | 0.503578                   |

The model used is: LinearReg..

Return the coefficient of determination of the prediction:

0.5938815939305324

R<sup>2</sup> score: 0.4715701900042242

Correlation coefficient: 0.6867096839307162

Test data - unseen during training:

R<sup>2</sup> score: 0.5938815939305324

Correlation coefficient: 0.7706371350580845

[7.89387822 6.432389 7.40284432 7.9722247 8.04392842 8.352564  
8.2751695 8.09665023 8.17323658 7.66460935 7.09914951 7.80818739  
7.60333465 7.91870918 8.31092654 8.28306099 6.64762499 6.08809477]

102 8.000000  
38 6.104025  
8 6.044360  
109 7.886057  
11 8.107905  
51 8.000000  
88 8.886057  
21 7.554396  
82 8.301030  
98 7.568636  
58 7.677781  
64 8.327902  
74 8.070581  
103 8.136677  
91 10.000000  
43 7.886057  
25 5.221704  
30 6.315155

Name: LoVo, dtype: float64

Training Root Mean Square Error: 0.6300116411653003

Testing Root Mean Square Error: 0.6975864260393481

```
[6]: print(target_column_name+str('_transformed'))  
      print(hist1[target_column_name].hist())
```

LoVo\_transformed

AxesSubplot(0.125,0.11;0.775x0.77)

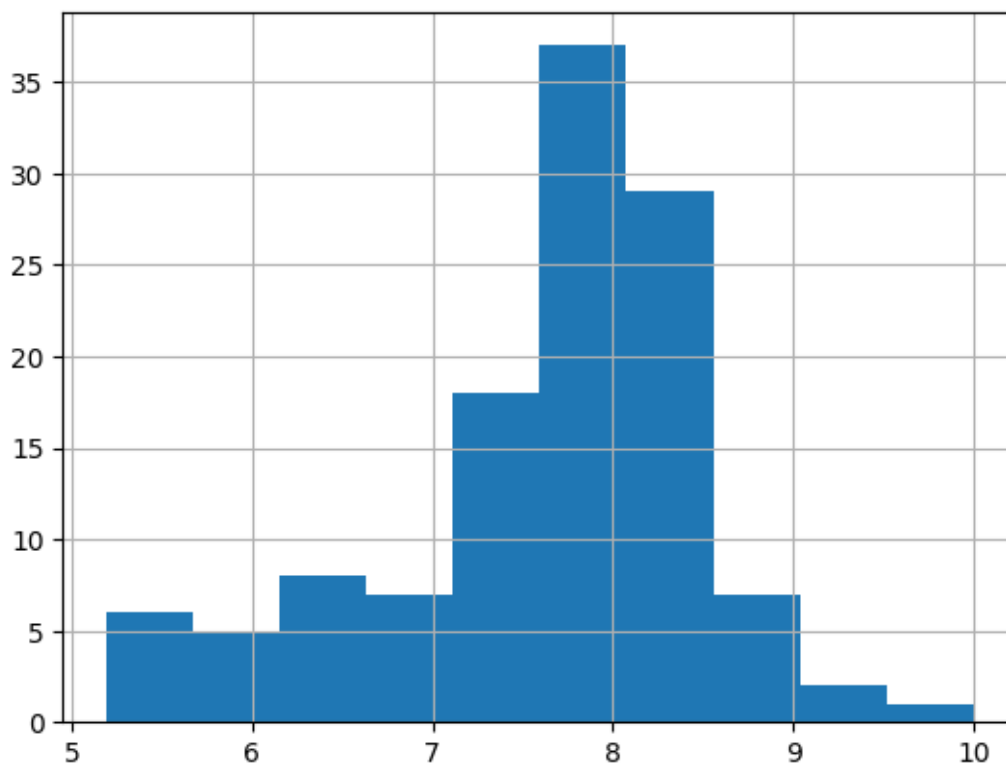

```
[7]: with_standardization, train_r2_, test_r2_, hist1, hist2, target_column_name,   
      ↪ training_data_RMSE, test_data_RMSE = pred_model.  
      ↪ prepare_data_and_create_model(molecular_descriptors_df=data,  
  
      ↪ correlation_threshold=0.50,  
  
      ↪ standardization=True,  
  
      ↪ model_type='linear_model',  
  
      ↪ target_column_name = target,
```

```

↪          random_state=random_state,
↪          train_test_split_=True,
↪          verbose=True)

```

I am doing standardization...

|   | molecular descriptor name |  |
|---|---------------------------|--|
| 0 | AATSOZ                    |  |
| 1 | AATSOare                  |  |
| 2 | AATSOd                    |  |
| 3 | AATSOdv                   |  |
| 4 | AATSOi                    |  |

  

|   | molecular descriptor name | corr_value |
|---|---------------------------|------------|
| 0 | AATSOZ                    | -0.027037  |
| 1 | AATSOare                  | -0.129823  |
| 2 | AATSOd                    | 0.042740   |
| 3 | AATSOdv                   | -0.120173  |
| 4 | AATSOi                    | 0.132395   |

  

|   | molecular descriptor name | corr_value | absolute correlation value |
|---|---------------------------|------------|----------------------------|
| 0 | AATSOZ                    | -0.027037  | 0.027037                   |
| 1 | AATSOare                  | -0.129823  | 0.129823                   |
| 2 | AATSOd                    | 0.042740   | 0.042740                   |
| 3 | AATSOdv                   | -0.120173  | 0.120173                   |
| 4 | AATSOi                    | 0.132395   | 0.132395                   |

  

|      | molecular descriptor name | corr_value | absolute correlation value |
|------|---------------------------|------------|----------------------------|
| 226  | AMID_0                    | -0.524157  | 0.524157                   |
| 505  | EState_VSA5               | -0.579664  | 0.579664                   |
| 791  | MDEO-12                   | -0.558727  | 0.558727                   |
| 851  | NdssC                     | -0.506855  | 0.506855                   |
| 1091 | VSA_EState5               | 0.503578   | 0.503578                   |

  

|      | molecular descriptor name | corr_value | absolute correlation value |
|------|---------------------------|------------|----------------------------|
| 226  | AMID_0                    | -0.524157  | 0.524157                   |
| 505  | EState_VSA5               | -0.579664  | 0.579664                   |
| 791  | MDEO-12                   | -0.558727  | 0.558727                   |
| 851  | NdssC                     | -0.506855  | 0.506855                   |
| 1091 | VSA_EState5               | 0.503578   | 0.503578                   |

The model used is: LinearReg..

Return the coefficient of determination of the prediction:

0.5938815939305324

R<sup>2</sup> score: 0.4715701900042242

Correlation coefficient: 0.6867096839307162

Test data - unseen during training:

R<sup>2</sup> score: 0.5938815939305324

Correlation coefficient: 0.7706371350580845

[7.89387822 6.432389 7.40284432 7.9722247 8.04392842 8.352564

```

8.2751695 8.09665023 8.17323658 7.66460935 7.09914951 7.80818739
7.60333465 7.91870918 8.31092654 8.28306099 6.64762499 6.08809477]
102      8.000000
38       6.104025
8        6.044360
109      7.886057
11       8.107905
51       8.000000
88       8.886057
21       7.554396
82       8.301030
98       7.568636
58       7.677781
64       8.327902
74       8.070581
103      8.136677
91      10.000000
43       7.886057
25       5.221704
30       6.315155
Name: LoVo, dtype: float64
Training Root Mean Square Error: 0.6300116411653003
Testing Root Mean Square Error: 0.6975864260393481

```

## 2.1 Search inside correlation space

```

[8]: step = 0.01
initial_step = corr_low
last_step = corr_high
first_list = [x / 100.0 for x in range(int(initial_step*100),
↳int(last_step*100), int(step*100))]
second_list = []
third_list = []
fourth_l = []
fifth_l = []
f_list = []
for i in first_list:
    without_standardization, train_r2, test_r2, _, h_, target_column_name,
↳training_data_RMSE, test_data_RMSE = pred_model.
↳prepare_data_and_create_model(molecular_descriptors_df = data,

↳
correlation_threshold = i,

↳
standardization = False,

↳
model_type = 'linear_model',

```

```

    ↪          target_column_name = target,
    ↪
    ↪          random_state=random_state,
    ↪
    ↪          train_test_split_ = True,
    ↪
    ↪          verbose = False)
    second_list.append(train_r2)
    third_list.append(test_r2)
    fourth_l.append(training_data_RMSE)
    fifth_l.append(test_data_RMSE)
    f_list.append(len(h_))

```

```

[9]: df_without_standardization = pd.DataFrame(data=first_list,
    ↪columns=["Correlation threshold"])
df_without_standardization['Training data R^2 score'] = second_list
df_without_standardization['Test data R^2 score'] = third_list
df_without_standardization['Training RMSE'] = fourth_l
df_without_standardization['Test RMSE'] = fifth_l
df_without_standardization['Number of features'] = f_list

```

```

[10]: df_linear = df_without_standardization.copy()
df_without_standardization

```

```

[10]:
Correlation threshold  Training data R^2 score  Test data R^2 score  \
0                    0.33                    0.901684            0.604189
1                    0.34                    0.858631            0.550573
2                    0.35                    0.850762            0.541115
3                    0.36                    0.802103            0.482693
4                    0.37                    0.727069            0.551007
5                    0.38                    0.688721            0.662709
6                    0.39                    0.659170            0.659592
7                    0.40                    0.647360            0.630994
8                    0.41                    0.647315            0.629807
9                    0.42                    0.605225            0.567152
10                   0.43                    0.605202            0.566682
11                   0.44                    0.605202            0.566682
12                   0.45                    0.583293            0.576643
13                   0.46                    0.549192            0.597857
14                   0.47                    0.484158            0.582995
15                   0.48                    0.471582            0.594438
16                   0.49                    0.471570            0.593882
17                   0.50                    0.471570            0.593882
18                   0.51                    0.448566            0.575939
19                   0.52                    0.448566            0.575939
20                   0.53                    0.439344            0.526231

```



21                                      0.54                                      0.439344                                      0.526231

|    | Training RMSE | Test RMSE | Number of features |
|----|---------------|-----------|--------------------|
| 0  | 0.271749      | 0.688677  | 63                 |
| 1  | 0.325861      | 0.733840  | 57                 |
| 2  | 0.334807      | 0.741521  | 52                 |
| 3  | 0.385544      | 0.787310  | 47                 |
| 4  | 0.452774      | 0.733486  | 39                 |
| 5  | 0.483537      | 0.635732  | 35                 |
| 6  | 0.505969      | 0.638662  | 27                 |
| 7  | 0.514660      | 0.664949  | 22                 |
| 8  | 0.514693      | 0.666018  | 21                 |
| 9  | 0.544540      | 0.720177  | 18                 |
| 10 | 0.544556      | 0.720568  | 17                 |
| 11 | 0.544556      | 0.720568  | 17                 |
| 12 | 0.559462      | 0.712238  | 14                 |
| 13 | 0.581903      | 0.694164  | 10                 |
| 14 | 0.622463      | 0.706874  | 7                  |
| 15 | 0.630005      | 0.697108  | 6                  |
| 16 | 0.630012      | 0.697586  | 5                  |
| 17 | 0.630012      | 0.697586  | 5                  |
| 18 | 0.643579      | 0.712829  | 3                  |
| 19 | 0.643579      | 0.712829  | 3                  |
| 20 | 0.648938      | 0.753451  | 2                  |
| 21 | 0.648938      | 0.753451  | 2                  |

[ ]:

## 2.2 Plots

```
[11]: plt.plot(df_without_standardization['Correlation threshold'],
             df_without_standardization['Training data R^2 score'], label = "Training
             data R^2 score", marker='v')
plt.plot(df_without_standardization['Correlation threshold'],
             df_without_standardization['Test data R^2 score'], label = "Test data R^2
             score", marker='D')
plt.legend()
plt.xlabel('Correlation threshold')
plt.ylabel('R^2 score')
plt.ylim([0, 1])
plt.show()
```

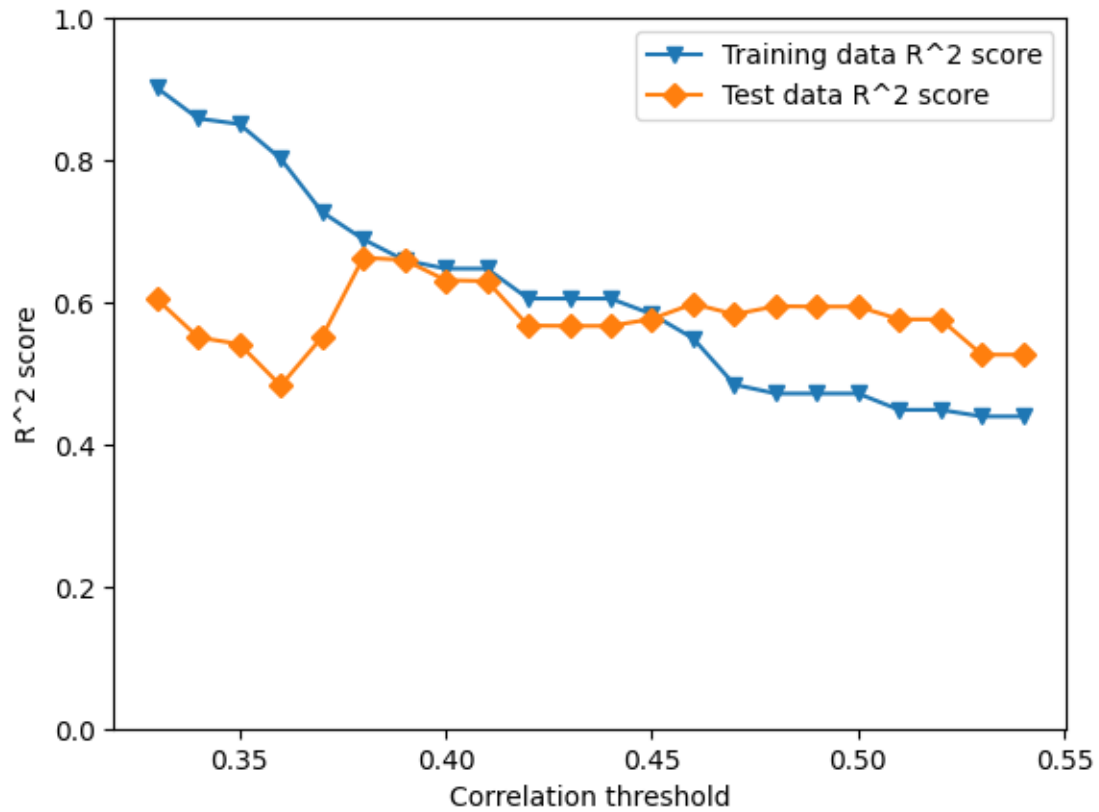

```
[12]: plt.plot(df_without_standardization['Correlation threshold'],
             df_without_standardization['Number of features'], label = "Number of
             features", marker='.')
plt.legend()
plt.xlabel('Correlation threshold')
plt.ylabel('Number of features')
plt.show()
```

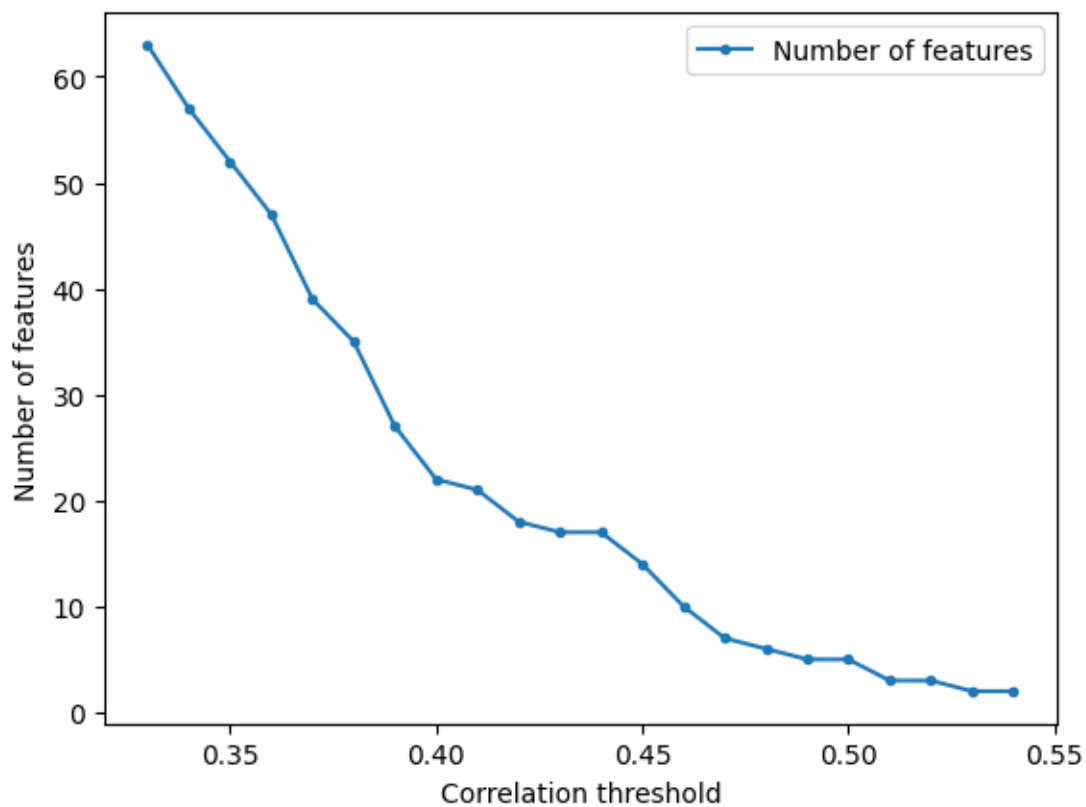

[ ]:

## 2.3 Decision Tree

```
[13]: without_standardization, train_r2_, test_r2_, hist1, hist2, target_column_name,
      ↪ training_data_RMSE, test_data_RMSE = pred_model.
      ↪ prepare_data_and_create_model(molecular_descriptors_df=data,
      ↪
      ↪         correlation_threshold=0.50,
      ↪
      ↪         standardization=False,
      ↪
      ↪         model_type='DecisionTreeRegressor',
      ↪
      ↪         max_depth=5,
      ↪
      ↪         target_column_name = target,
      ↪
      ↪         random_state=random_state,
```

```

↪          train_test_split_=True,
↪          verbose=True)

```

I am not doing standardization...

|      | molecular descriptor name |            |                            |
|------|---------------------------|------------|----------------------------|
| 0    | AATS0Z                    |            |                            |
| 1    | AATS0are                  |            |                            |
| 2    | AATS0d                    |            |                            |
| 3    | AATS0dv                   |            |                            |
| 4    | AATS0i                    |            |                            |
|      | molecular descriptor name | corr_value |                            |
| 0    | AATS0Z                    | -0.027037  |                            |
| 1    | AATS0are                  | -0.129823  |                            |
| 2    | AATS0d                    | 0.042740   |                            |
| 3    | AATS0dv                   | -0.120173  |                            |
| 4    | AATS0i                    | 0.132395   |                            |
|      | molecular descriptor name | corr_value | absolute correlation value |
| 0    | AATS0Z                    | -0.027037  | 0.027037                   |
| 1    | AATS0are                  | -0.129823  | 0.129823                   |
| 2    | AATS0d                    | 0.042740   | 0.042740                   |
| 3    | AATS0dv                   | -0.120173  | 0.120173                   |
| 4    | AATS0i                    | 0.132395   | 0.132395                   |
|      | molecular descriptor name | corr_value | absolute correlation value |
| 226  | AMID_0                    | -0.524157  | 0.524157                   |
| 505  | EState_VSA5               | -0.579664  | 0.579664                   |
| 791  | MDEO-12                   | -0.558727  | 0.558727                   |
| 851  | NdssC                     | -0.506855  | 0.506855                   |
| 1091 | VSA_EState5               | 0.503578   | 0.503578                   |
|      | molecular descriptor name | corr_value | absolute correlation value |
| 226  | AMID_0                    | -0.524157  | 0.524157                   |
| 505  | EState_VSA5               | -0.579664  | 0.579664                   |
| 791  | MDEO-12                   | -0.558727  | 0.558727                   |
| 851  | NdssC                     | -0.506855  | 0.506855                   |
| 1091 | VSA_EState5               | 0.503578   | 0.503578                   |

The model used is: DecisionTree...

Return the coefficient of determination of the prediction:

0.31900598680762904

R<sup>2</sup> score: 0.8318545988389252

Correlation coefficient: 0.9120606333127887

Test data - unseen during training:

R<sup>2</sup> score: 0.31900598680762904

Correlation coefficient: 0.5648061497608087

[7.75784502 5.82126536 7.65111515 8.18929441 8.49920533 7.33370906  
8.18929441 7.33370906 8.18929441 8.49920533 7.04932534 7.75784502  
8.49920533 7.75784502 7.33370906 8.18929441 5.82126536 5.19341307]

102 8.000000

```
38      6.104025
8       6.044360
109     7.886057
11      8.107905
51      8.000000
88      8.886057
21      7.554396
82      8.301030
98      7.568636
58      7.677781
64      8.327902
74      8.070581
103     8.136677
91     10.000000
43      7.886057
25      5.221704
30      6.315155
```

```
Name: LoVo, dtype: float64
```

```
Training Root Mean Square Error: 0.3553836279194085
```

```
Testing Root Mean Square Error: 0.9033235482494083
```

```
[14]: print(target_column_name+str('_transformed'))
      print(hist1[target_column_name].hist())
```

```
LoVo_transformed
```

```
AxesSubplot(0.125,0.11;0.775x0.77)
```



```
[15]: with_standardization, train_r2_, test_r2_, hist1, hist2, target_column_name,
      ↪ training_data_RMSE, test_data_RMSE = pred_model.
      ↪ prepare_data_and_create_model(molecular_descriptors_df=data,
      ↪
      ↪         correlation_threshold=0.50,
      ↪
      ↪         standardization=True,
      ↪
      ↪         model_type='DecisionTreeRegressor',
      ↪
      ↪         max_depth=5,
      ↪
      ↪         target_column_name = target,
      ↪
      ↪         random_state=random_state,
      ↪
      ↪         train_test_split_=True,
      ↪
      ↪         verbose=True)
```

I am doing standardization...  
molecular descriptor name

|                                                                 |             |           |          |
|-----------------------------------------------------------------|-------------|-----------|----------|
| 0                                                               | AATSOZ      |           |          |
| 1                                                               | AATSOare    |           |          |
| 2                                                               | AATSOd      |           |          |
| 3                                                               | AATSOdv     |           |          |
| 4                                                               | AATSOi      |           |          |
| molecular descriptor name corr_value                            |             |           |          |
| 0                                                               | AATSOZ      | -0.027037 |          |
| 1                                                               | AATSOare    | -0.129823 |          |
| 2                                                               | AATSOd      | 0.042740  |          |
| 3                                                               | AATSOdv     | -0.120173 |          |
| 4                                                               | AATSOi      | 0.132395  |          |
| molecular descriptor name corr_value absolute correlation value |             |           |          |
| 0                                                               | AATSOZ      | -0.027037 | 0.027037 |
| 1                                                               | AATSOare    | -0.129823 | 0.129823 |
| 2                                                               | AATSOd      | 0.042740  | 0.042740 |
| 3                                                               | AATSOdv     | -0.120173 | 0.120173 |
| 4                                                               | AATSOi      | 0.132395  | 0.132395 |
| molecular descriptor name corr_value absolute correlation value |             |           |          |
| 226                                                             | AMID_0      | -0.524157 | 0.524157 |
| 505                                                             | EState_VSA5 | -0.579664 | 0.579664 |
| 791                                                             | MDEO-12     | -0.558727 | 0.558727 |
| 851                                                             | NdssC       | -0.506855 | 0.506855 |
| 1091                                                            | VSA_EState5 | 0.503578  | 0.503578 |
| molecular descriptor name corr_value absolute correlation value |             |           |          |
| 226                                                             | AMID_0      | -0.524157 | 0.524157 |
| 505                                                             | EState_VSA5 | -0.579664 | 0.579664 |
| 791                                                             | MDEO-12     | -0.558727 | 0.558727 |
| 851                                                             | NdssC       | -0.506855 | 0.506855 |
| 1091                                                            | VSA_EState5 | 0.503578  | 0.503578 |

The model used is: DecisionTree...

Return the coefficient of determination of the prediction:

0.31900598680762904

R<sup>2</sup> score: 0.8318545988389252

Correlation coefficient: 0.9120606333127887

Test data - unseen during training:

R<sup>2</sup> score: 0.31900598680762904

Correlation coefficient: 0.5648061497608087

[7.75784502 5.82126536 7.65111515 8.18929441 8.49920533 7.33370906  
8.18929441 7.33370906 8.18929441 8.49920533 7.04932534 7.75784502  
8.49920533 7.75784502 7.33370906 8.18929441 5.82126536 5.19341307]

|     |          |
|-----|----------|
| 102 | 8.000000 |
| 38  | 6.104025 |
| 8   | 6.044360 |
| 109 | 7.886057 |
| 11  | 8.107905 |
| 51  | 8.000000 |
| 88  | 8.886057 |
| 21  | 7.554396 |

```

82      8.301030
98      7.568636
58      7.677781
64      8.327902
74      8.070581
103     8.136677
91     10.000000
43      7.886057
25      5.221704
30      6.315155

```

Name: LoVo, dtype: float64

Training Root Mean Square Error: 0.3553836279194085

Testing Root Mean Square Error: 0.9033235482494083

## 2.4 Search inside correlation space

```

[16]: step = 0.01
      initial_step = corr_low
      last_step = corr_high
      first_list = [x / 100.0 for x in range(int(initial_step*100),
      ↪int(last_step*100), int(step*100))]
      max_depth = [range(2, 30, 1)]
      corr_th = []
      second_list = []
      third_list = []
      fourth_l = []
      fifth_l = []
      f_list = []
      fif_list = []
      for i in first_list:
          for depth in max_depth[0]:

              without_standardization, train_r2, test_r2, _, h_, target_column_name,
              ↪training_data_RMSE, test_data_RMSE = pred_model.
              ↪prepare_data_and_create_model(molecular_descriptors_df=data,

              ↪correlation_threshold=i,

              ↪standardization=False,

              ↪model_type='DecisionTreeRegressor',

              ↪max_depth=depth,

              ↪target_column_name = target,

              ↪random_state=random_state,

```



```

↪          train_test_split_=True,
↪          verbose=False)
    corr_th.append(i)
    second_list.append(train_r2)
    third_list.append(test_r2)
    fourth_l.append(training_data_RMSE)
    fifth_l.append(test_data_RMSE)
    f_list.append(len(h_))
    fif_list.append(depth)

```

```

[17]: df_without_standardization = pd.DataFrame(data=corr_th, columns=["Correlation_
↪threshold"])
df_without_standardization['Training data R^2 score'] = second_list
df_without_standardization['Test data R^2 score'] = third_list
df_without_standardization['Training RMSE'] = fourth_l
df_without_standardization['Test RMSE'] = fifth_l
df_without_standardization['Number of features'] = f_list
df_without_standardization['Depth number'] = fif_list

```

```

[18]: df_decision_tree = df_without_standardization.copy()
#df_without_standardization.to_excel('../Data/
↪A549_Decision_tree_rs_'+str(random_state)+'.xlsx')

```

## 2.5 Plots

```
[19]: corre_list = [x / 100.0 for x in range(int(initial_step*100),
    ↪int(last_step*100), int(0.01*100))]
for element in corre_list:
    element_ =
    ↪df_without_standardization[df_without_standardization['Correlation_
    ↪threshold'] == float(element)]
    plt.plot(element_['Depth number'], element_['Training data R^2 score'],
    ↪label = "Training data R^2 score", marker='v')
    plt.plot(element_['Depth number'], element_['Test data R^2 score'], label =
    ↪"Test data R^2 score", marker='D')
    plt.legend()
    plt.xlabel('Depth number -> correlation threshold: '+str(element)+'.\n
    ↪Number of features: '+str(element_['Number of features'].iloc[0]),
    ↪fontweight='bold')
    plt.xlim(max(element_['Depth number'])+1, min(element_['Depth number'])-1)
    plt.ylabel('R^2 score')
    plt.ylim([0, 1])
    plt.rc('grid', linestyle="-. ", color='black')
    plt.grid(True)
    plt.show()
```

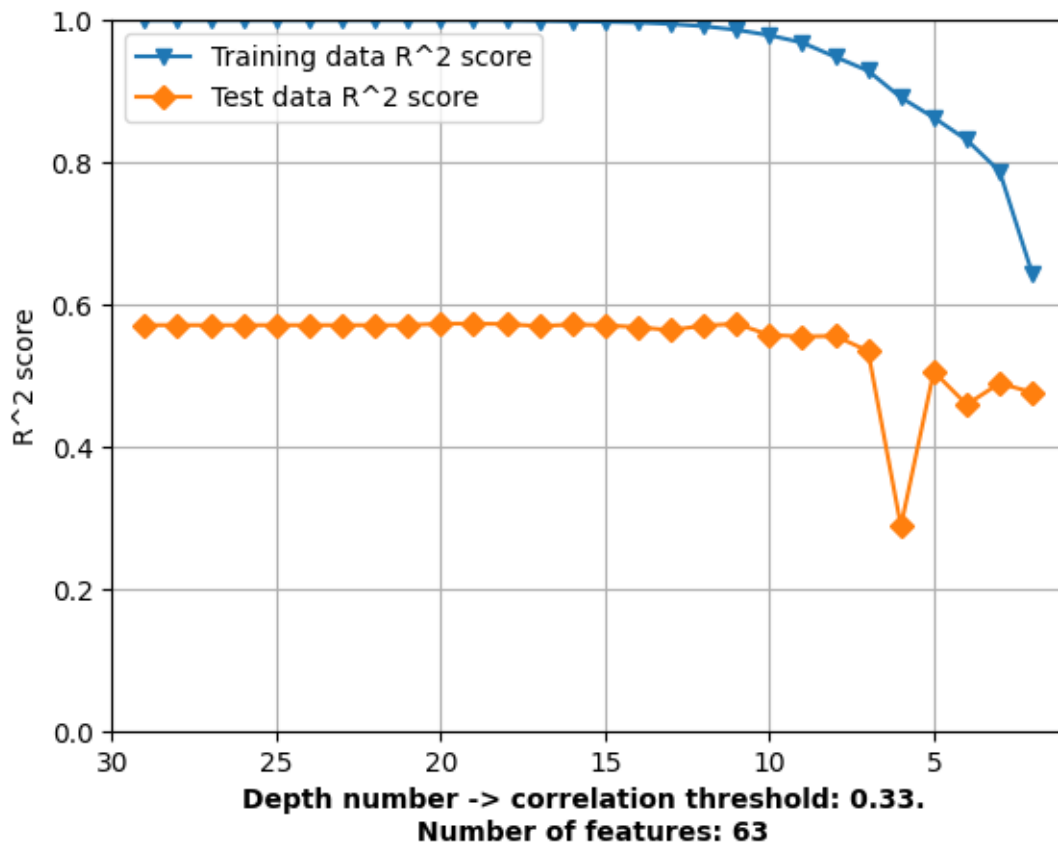

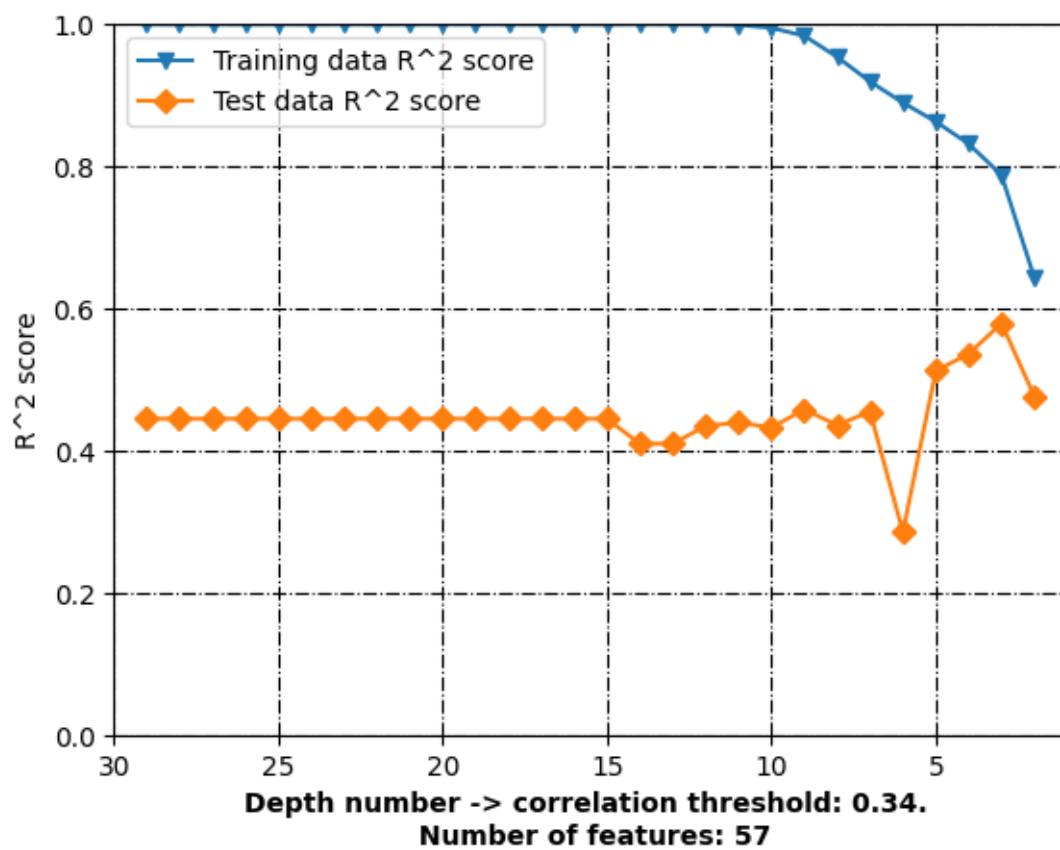

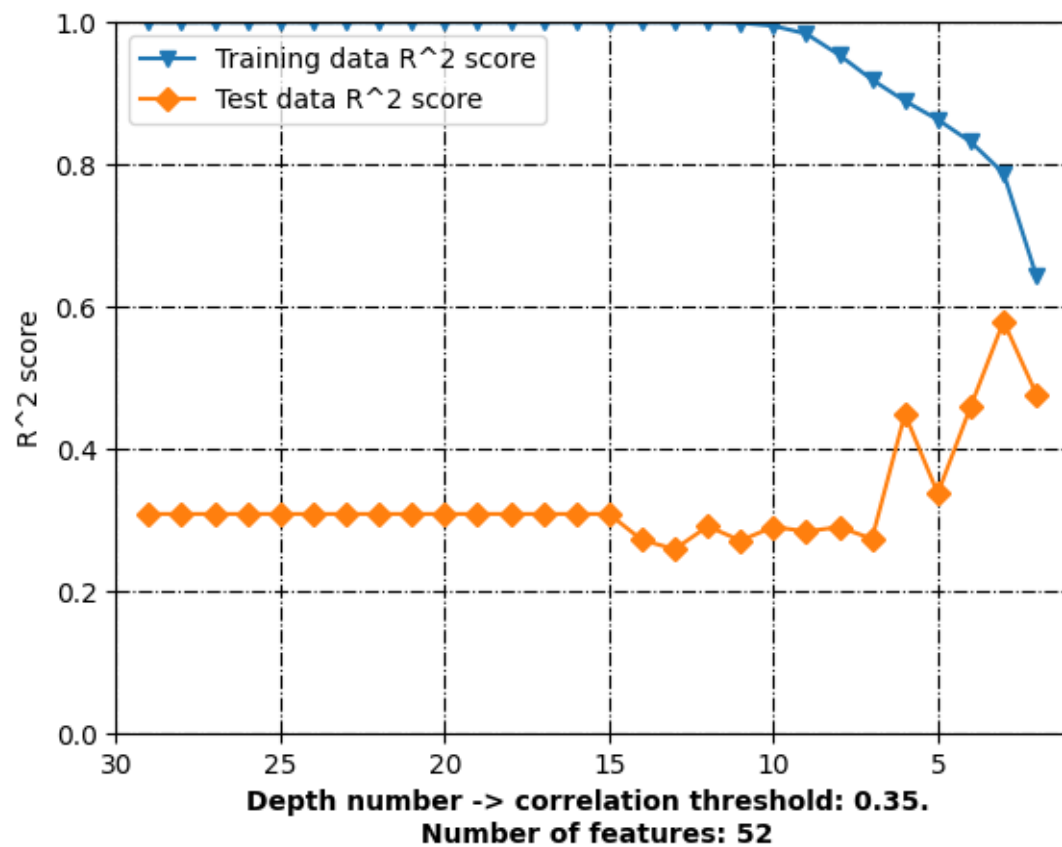

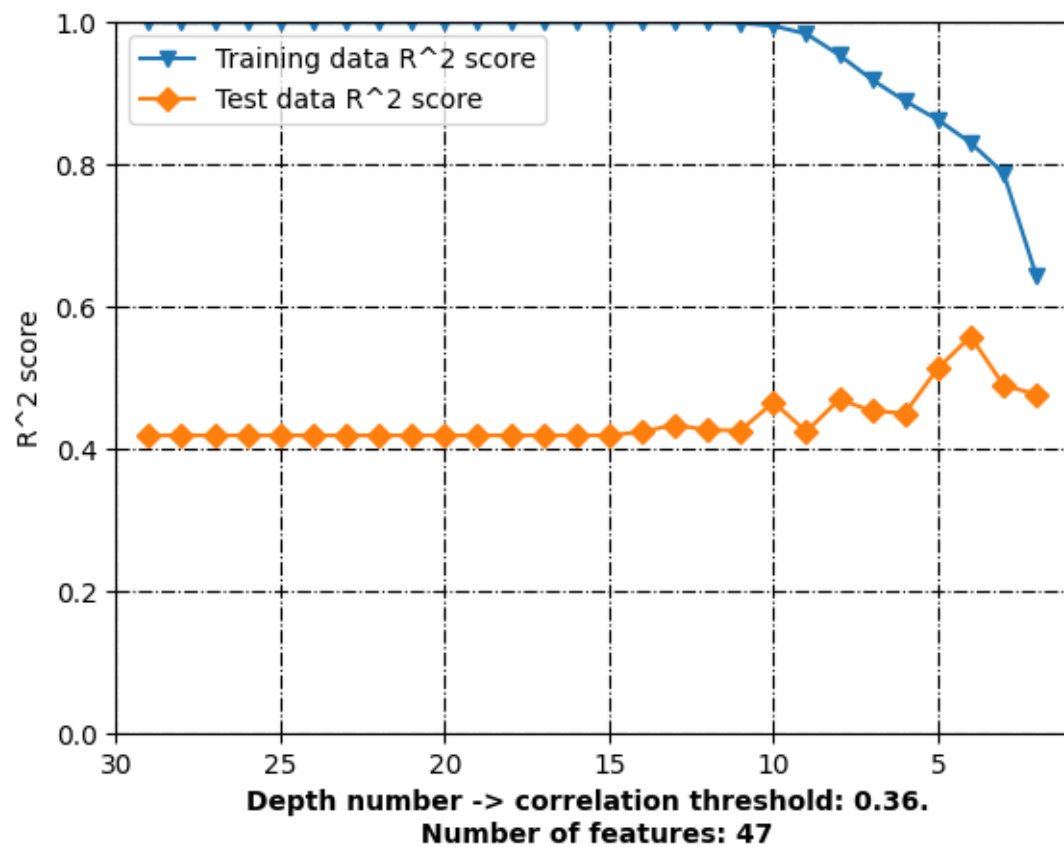

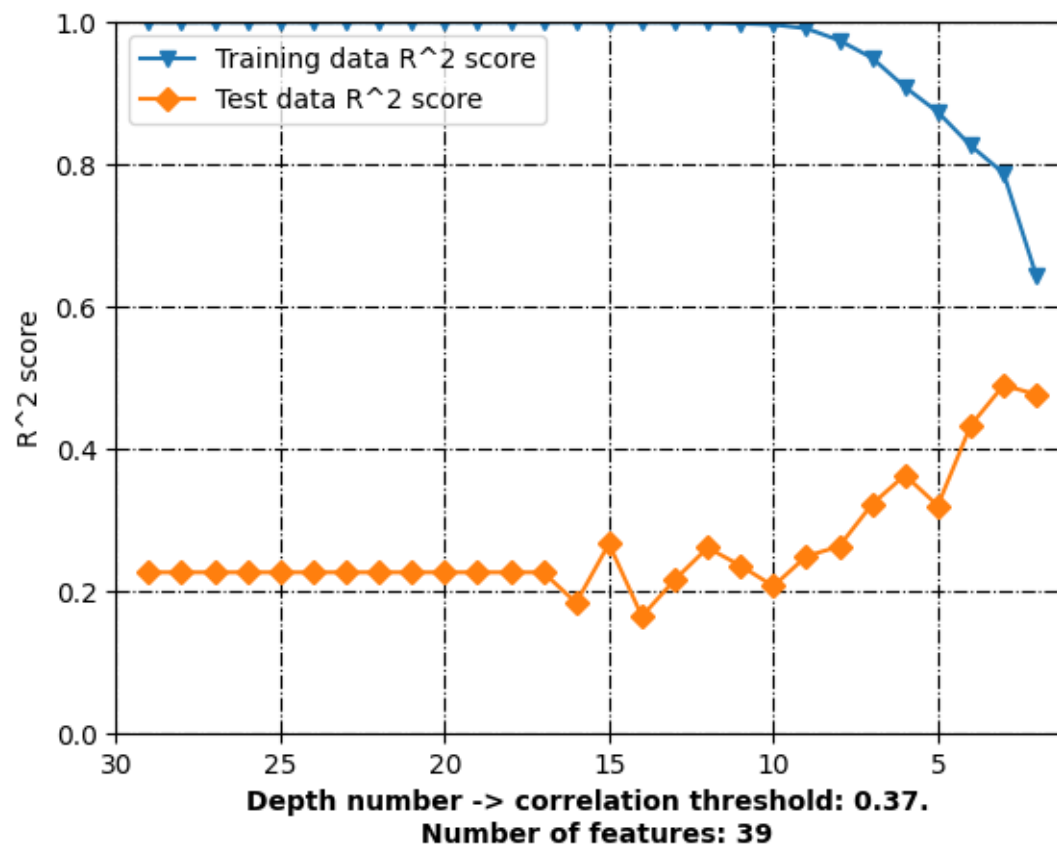

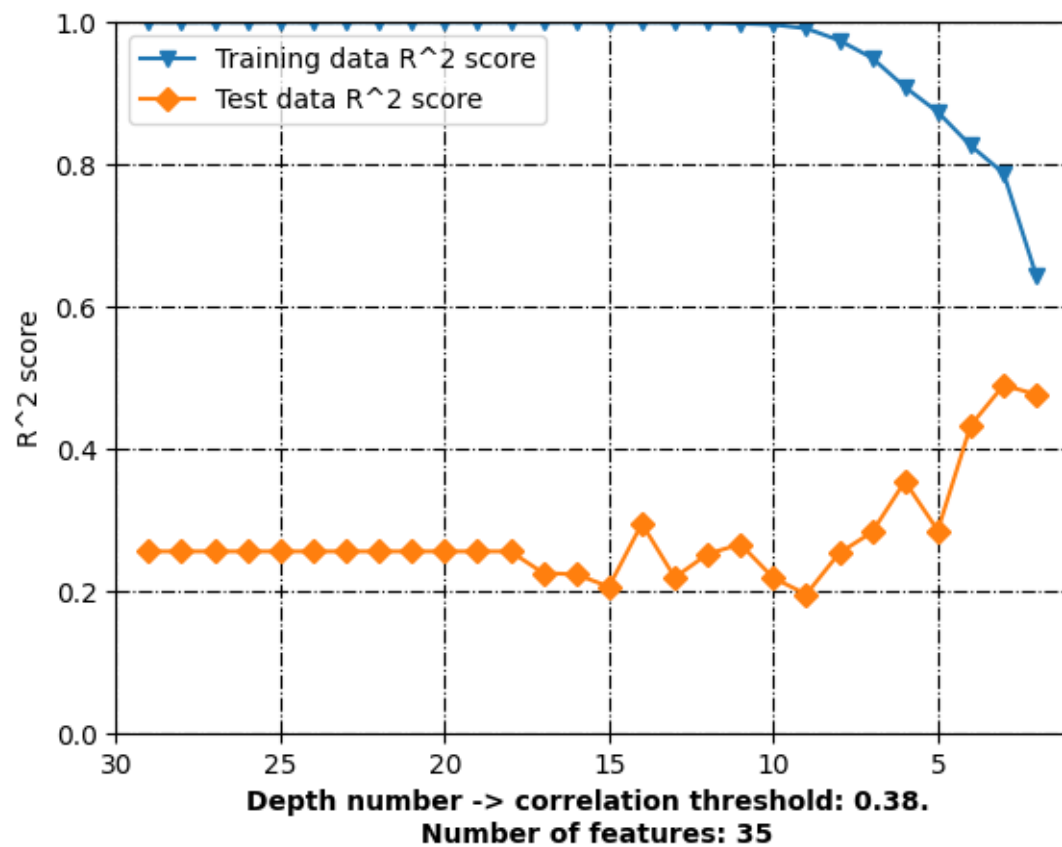

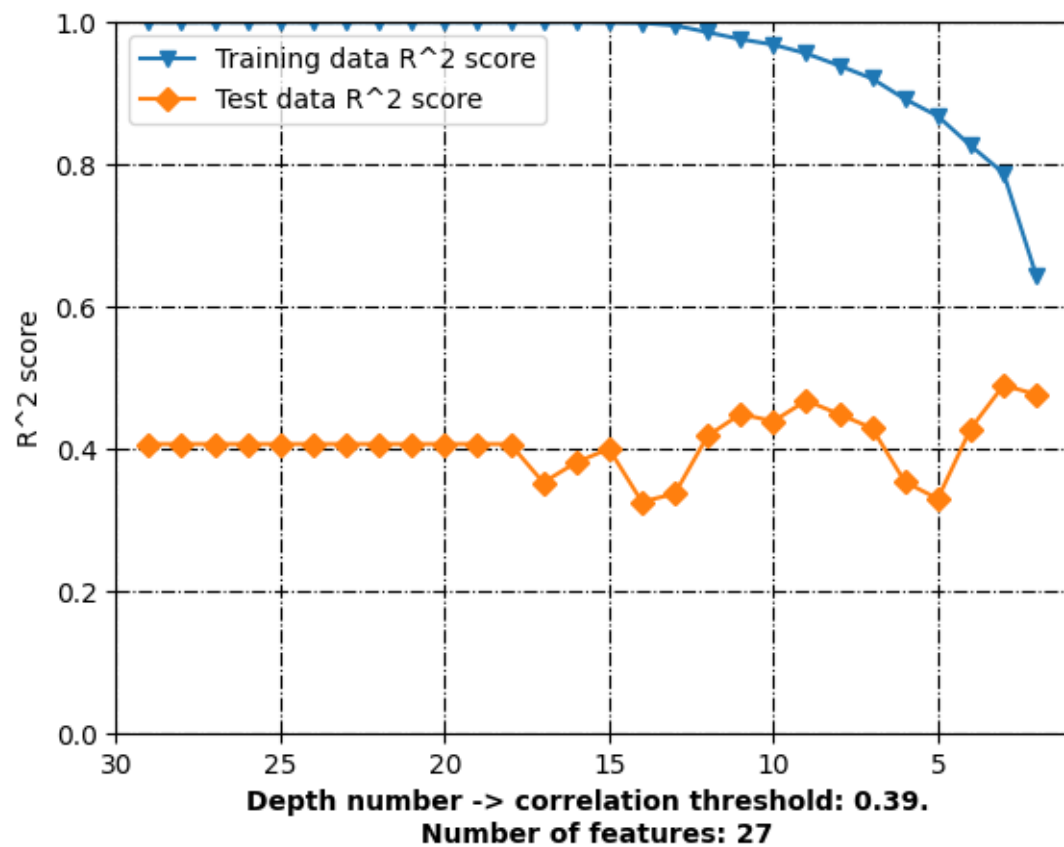



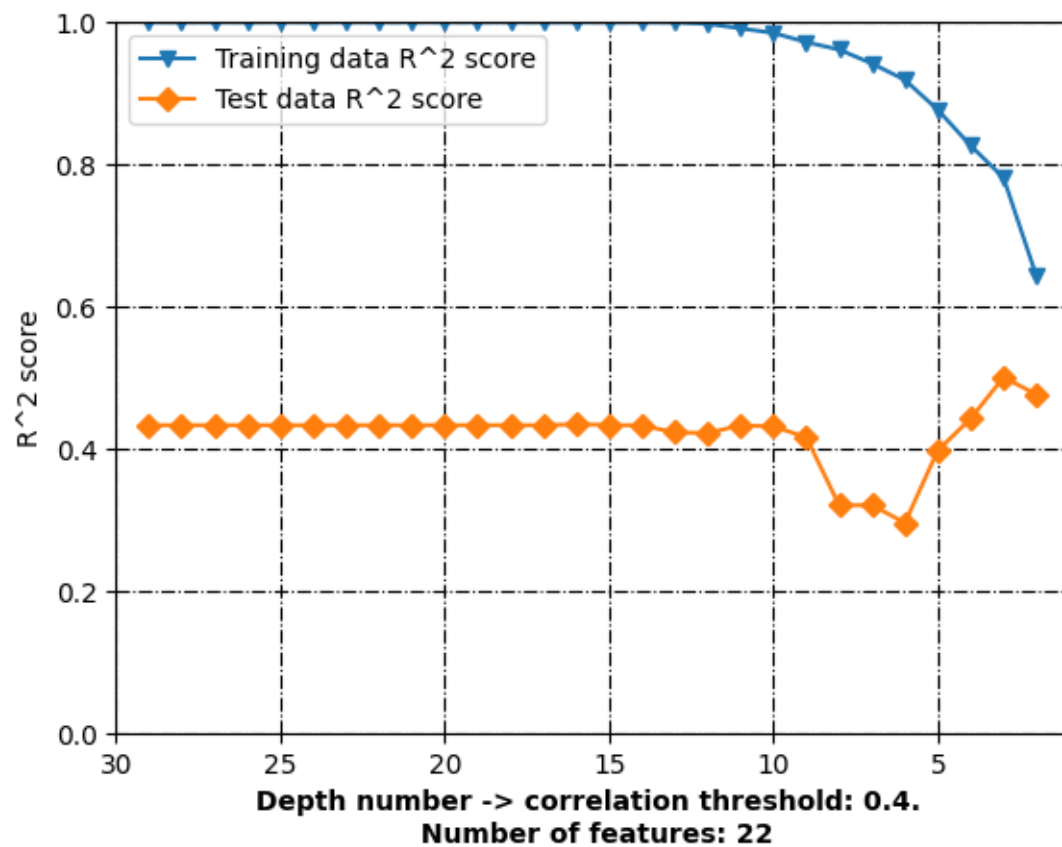

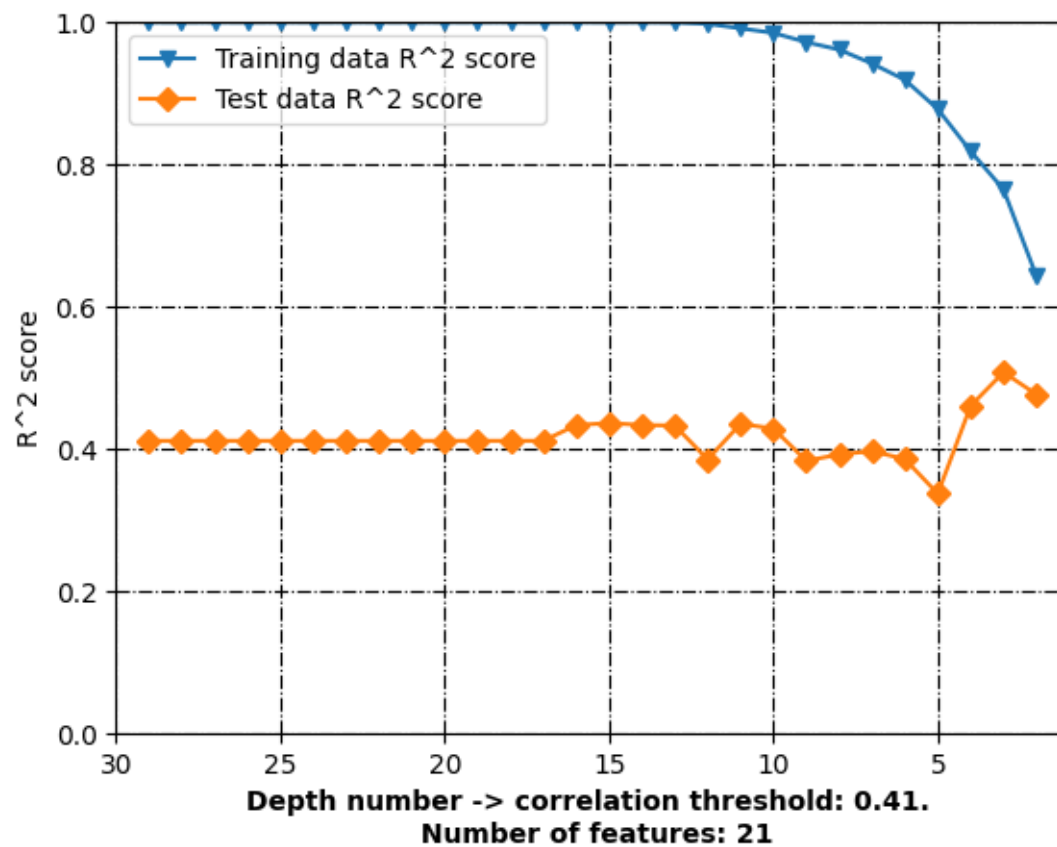

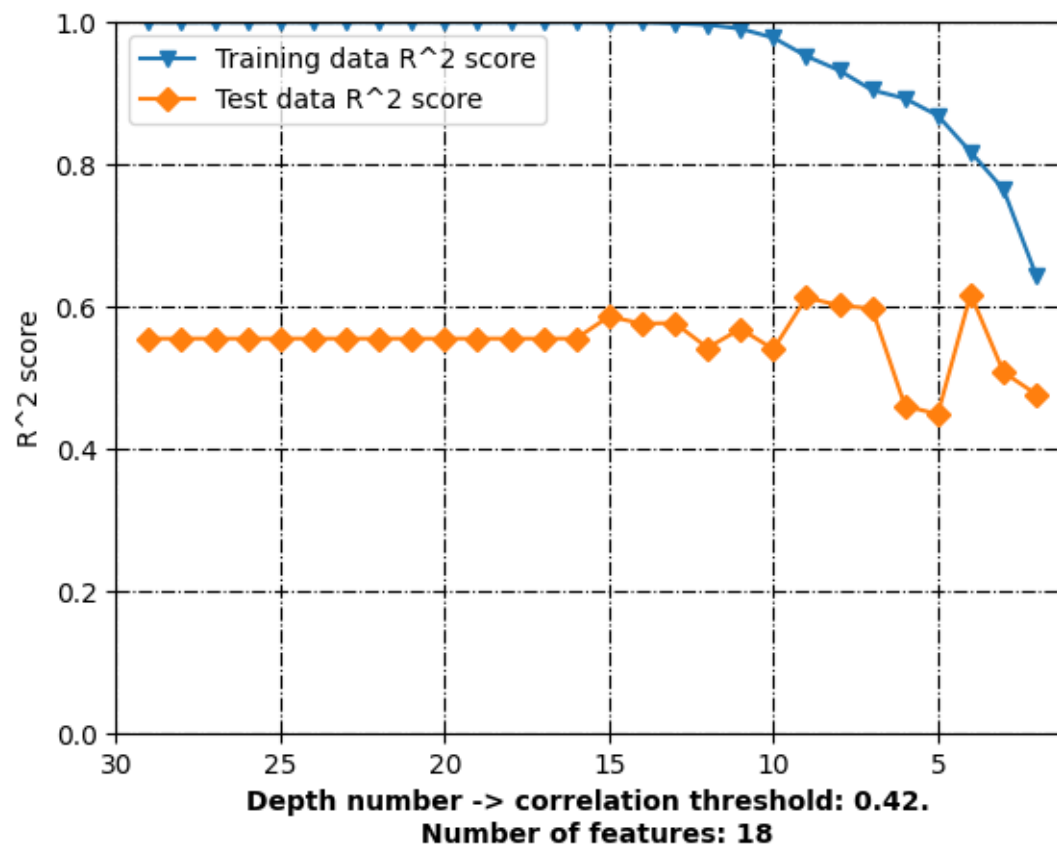

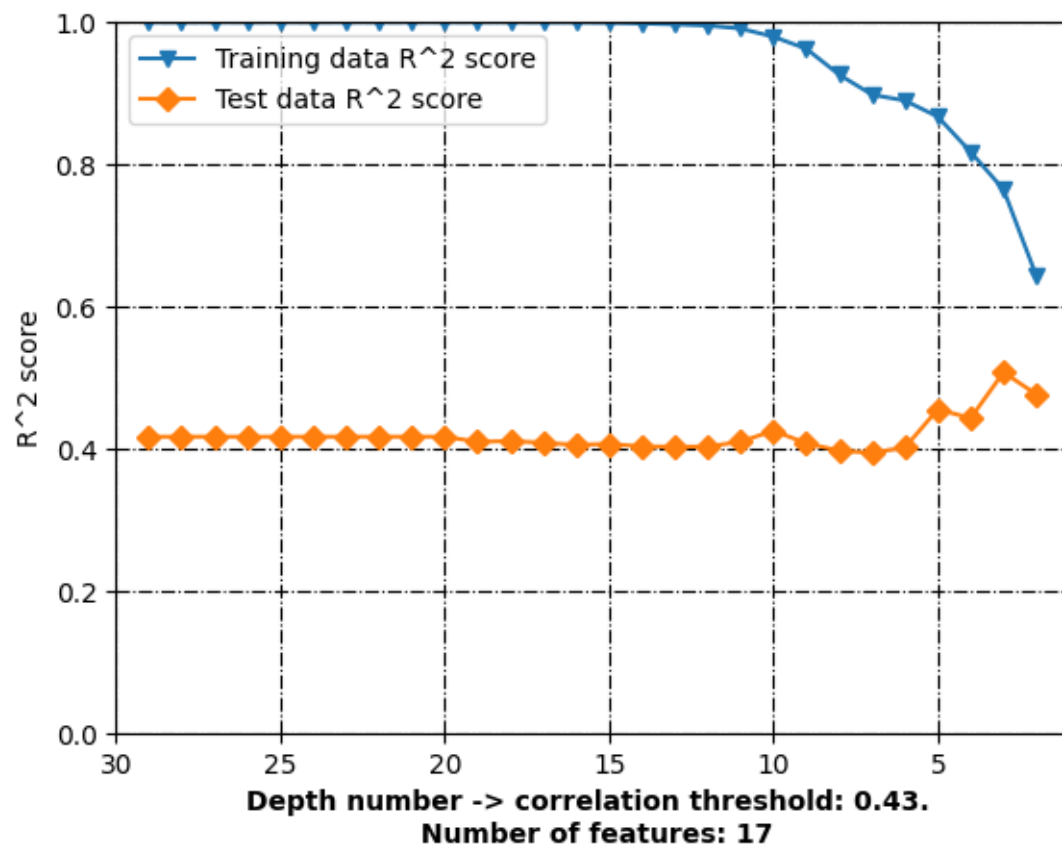

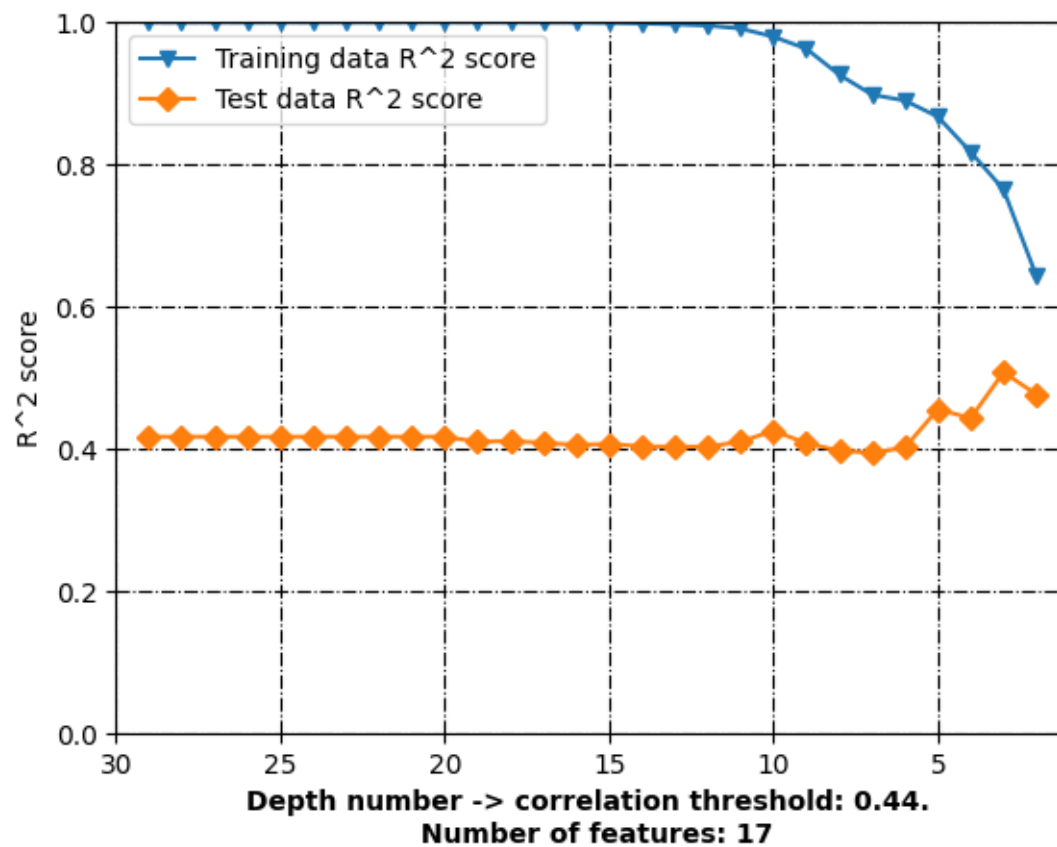

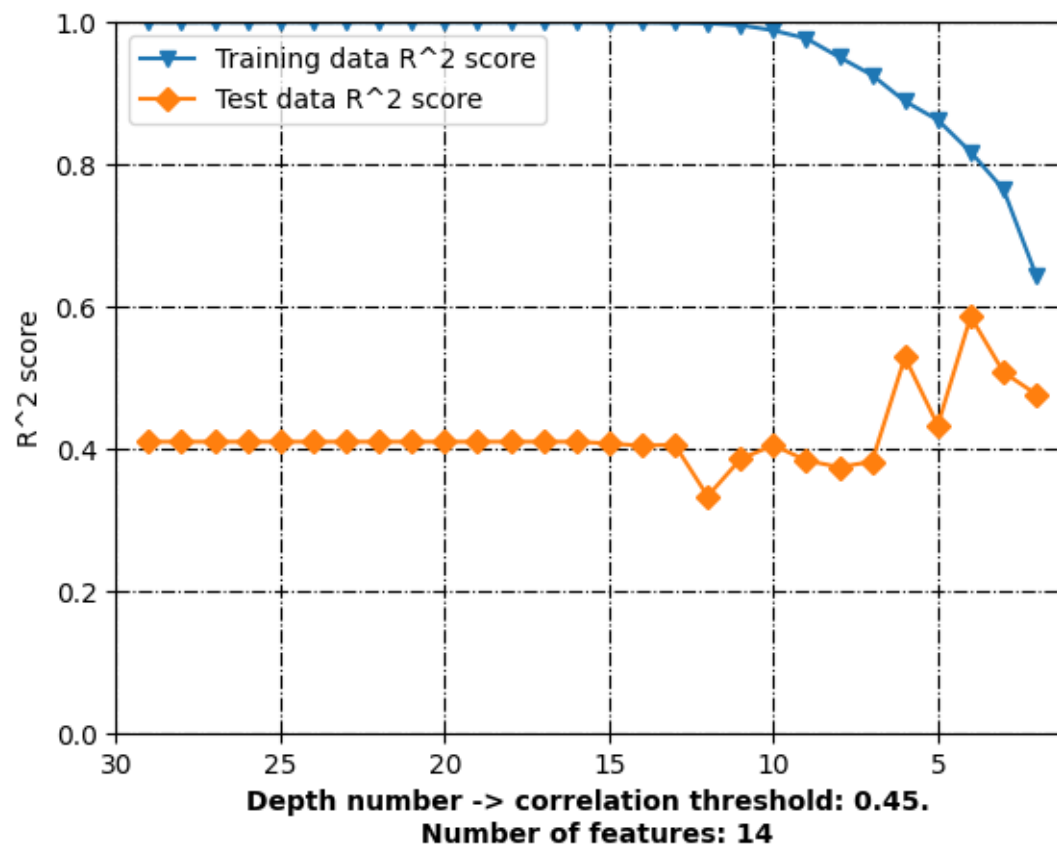

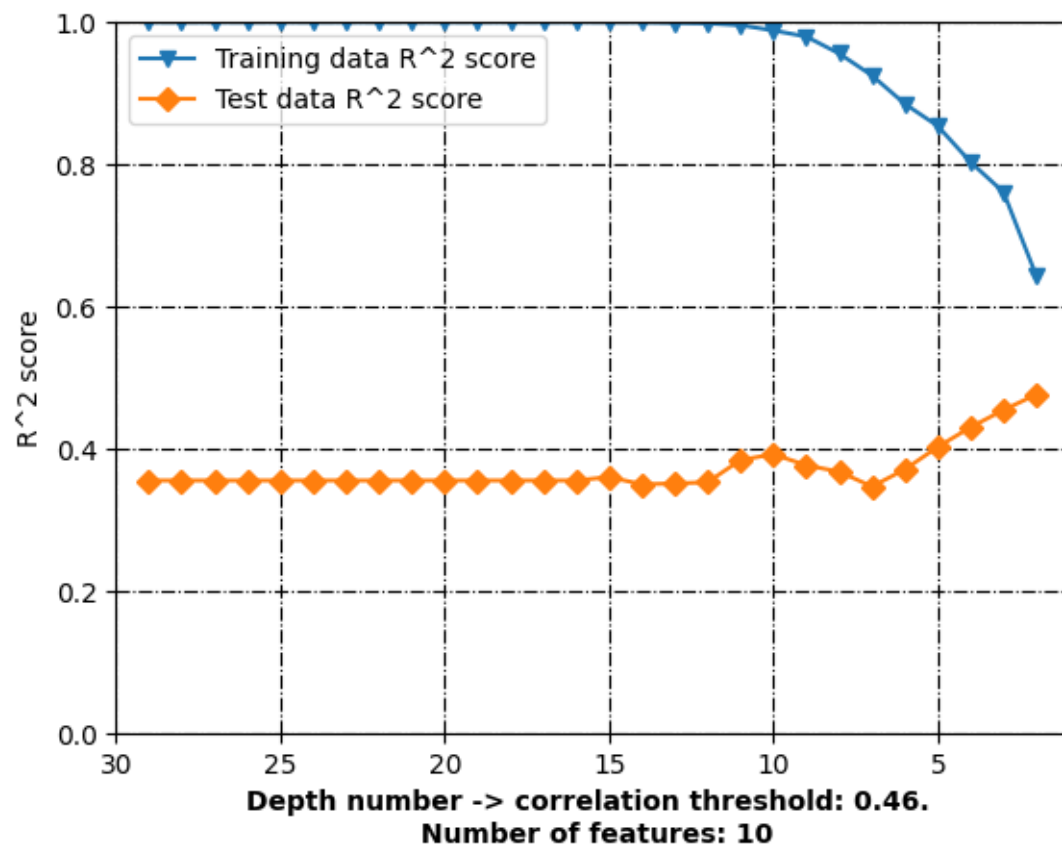

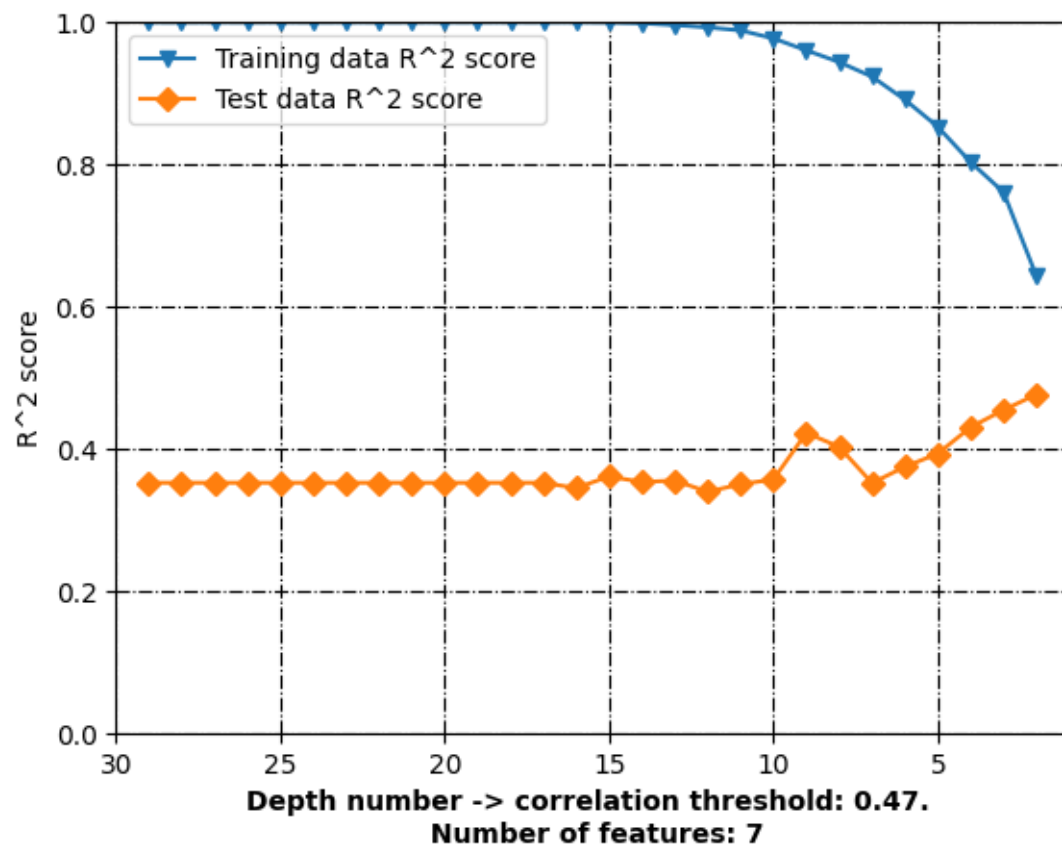



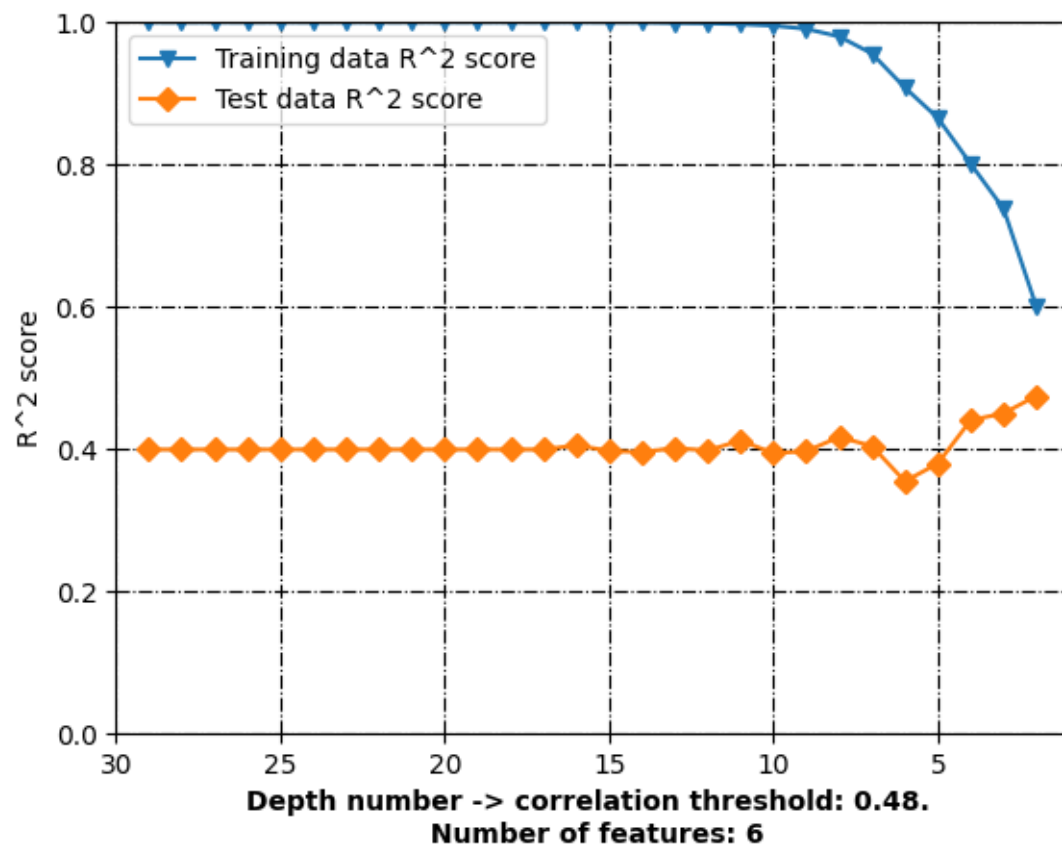

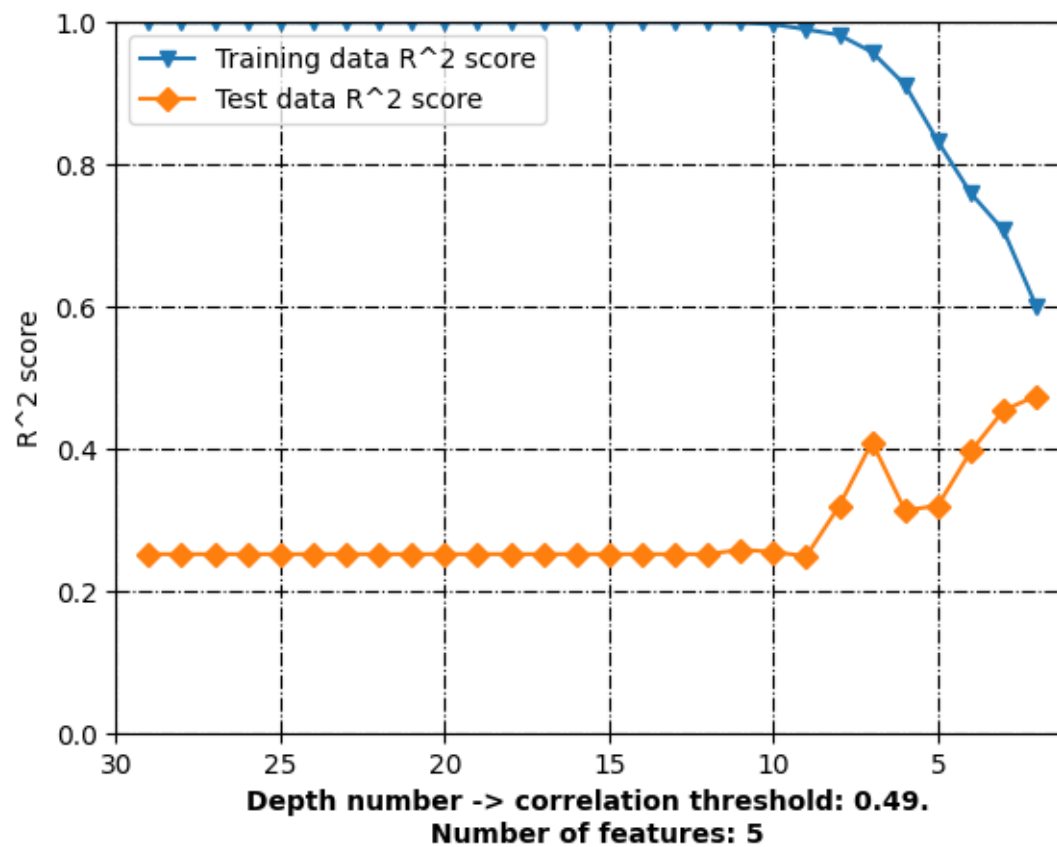

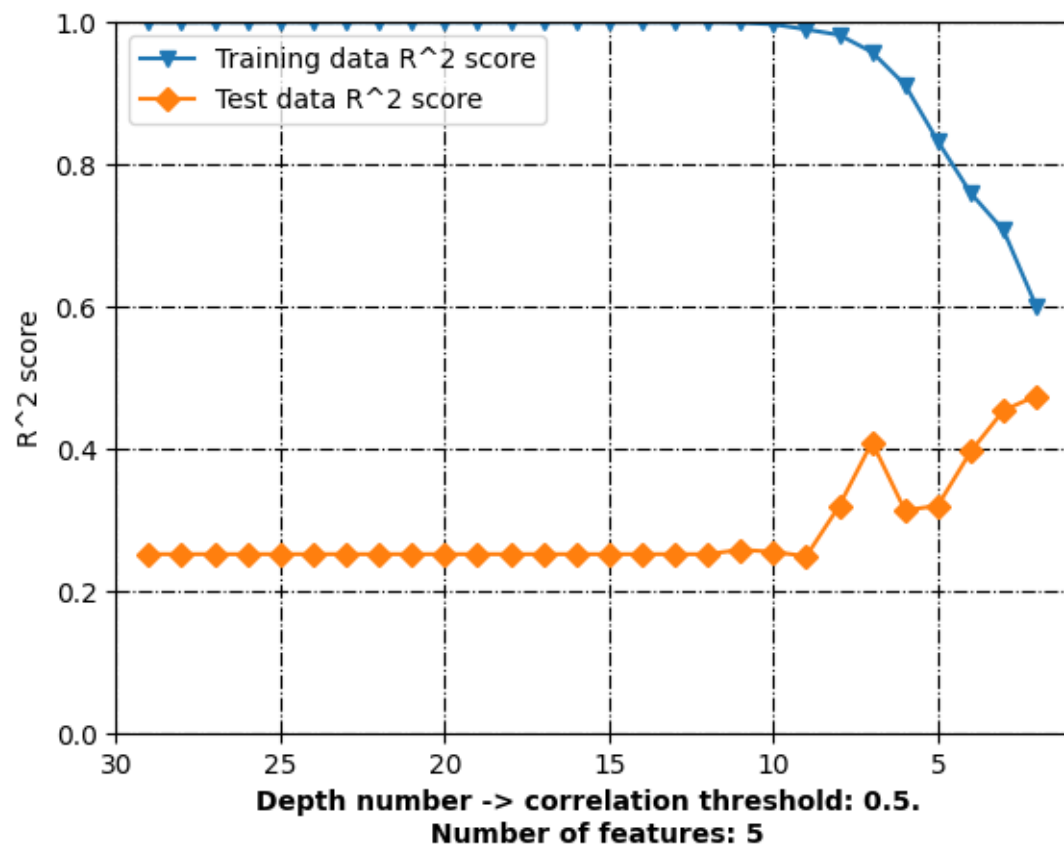

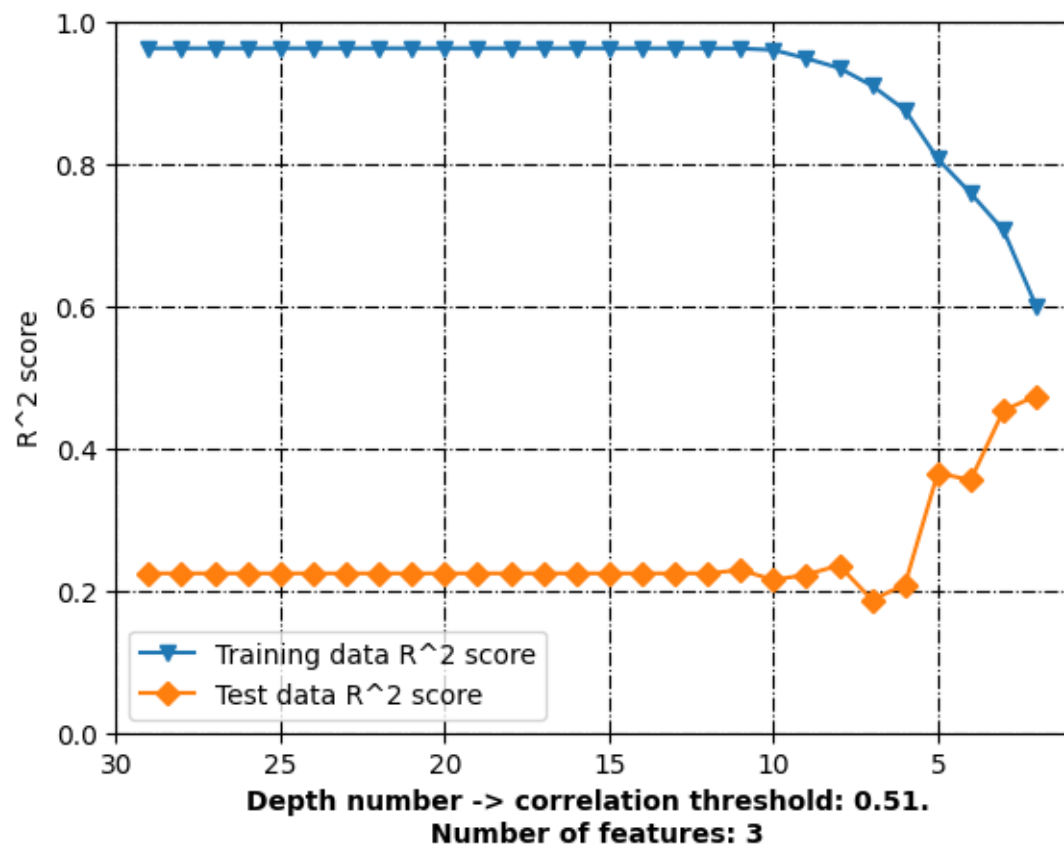

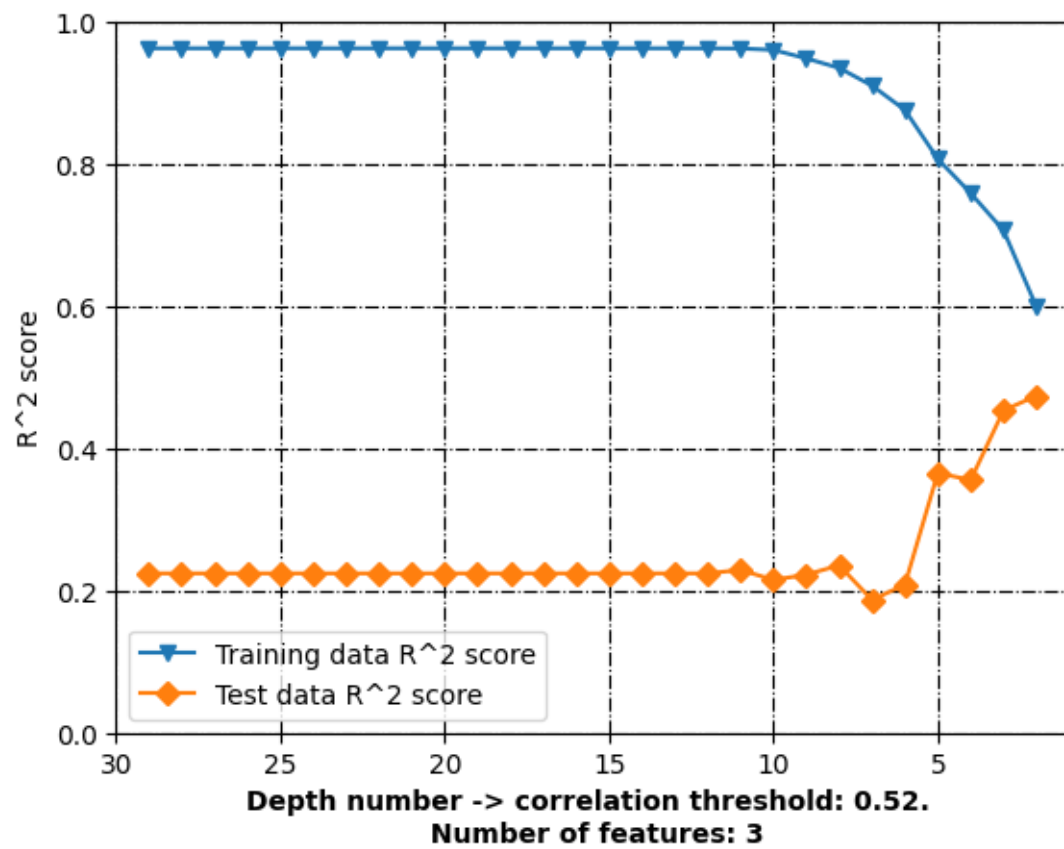

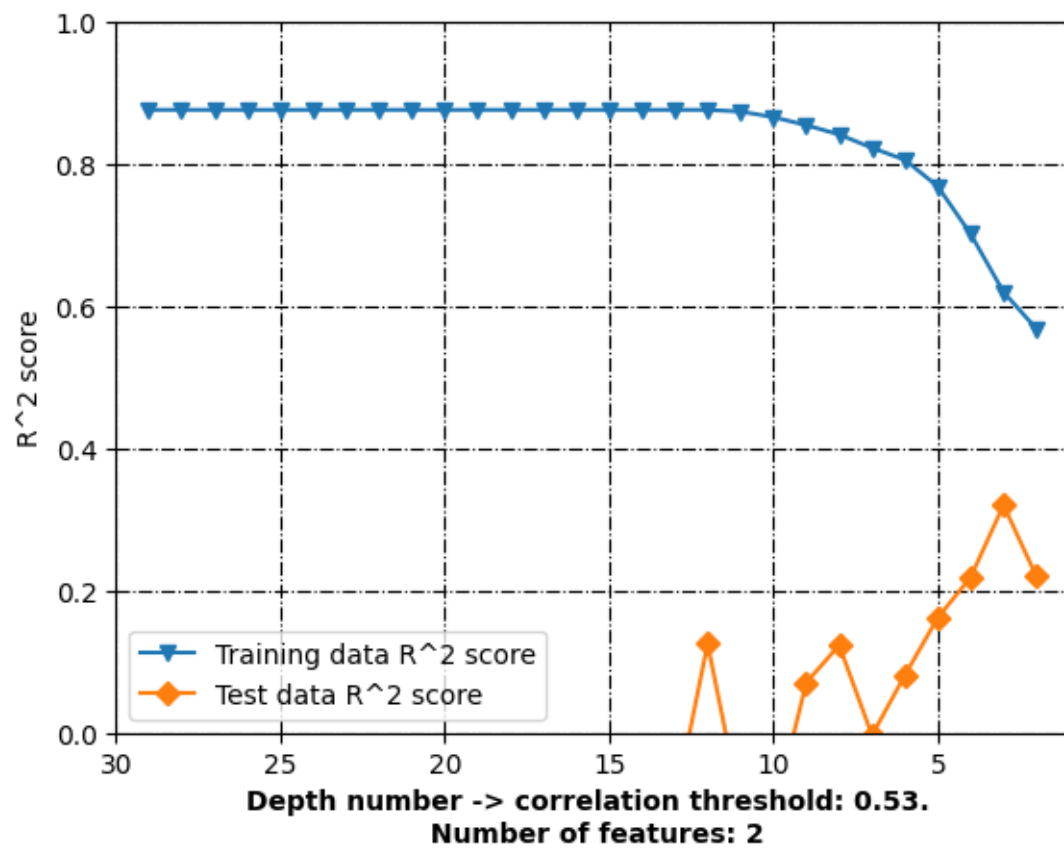

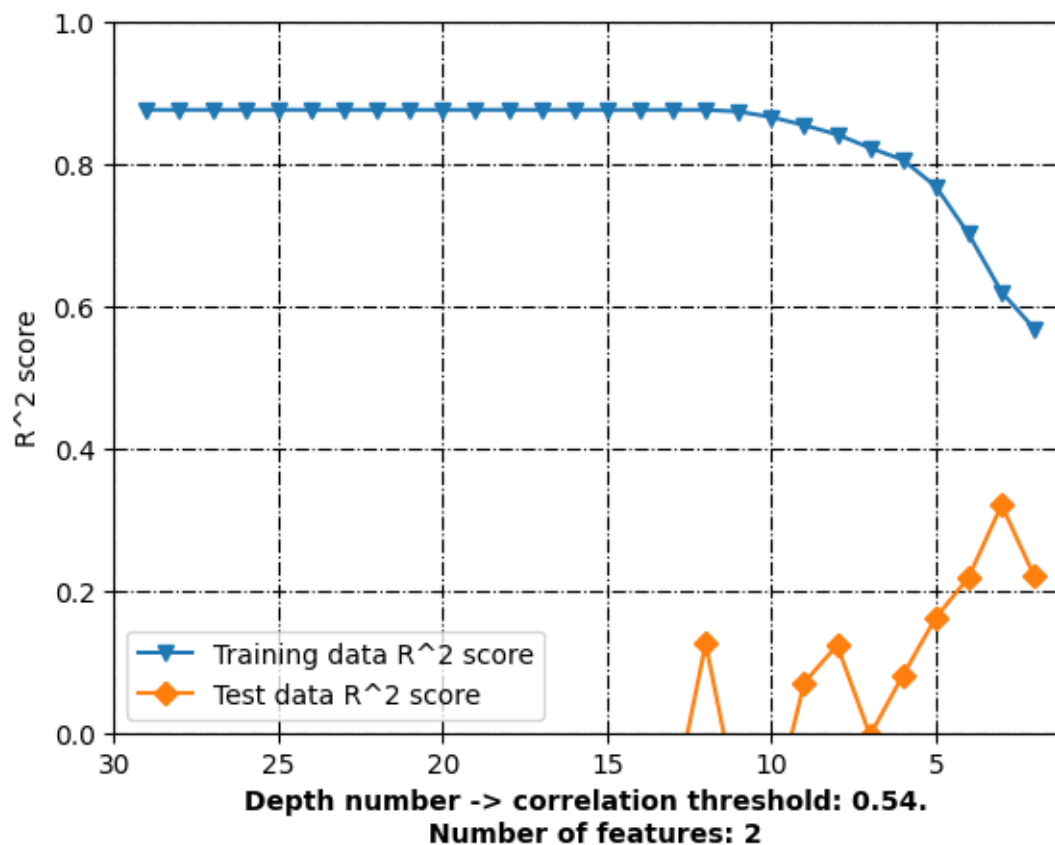

```
[20]: plt.plot(df_without_standardization['Correlation threshold'],  
             df_without_standardization['Number of features'], label = "Number of  
             features", marker='.')  
plt.legend()  
plt.xlabel('Correlation threshold')  
plt.ylabel('Number of features')  
plt.show()
```

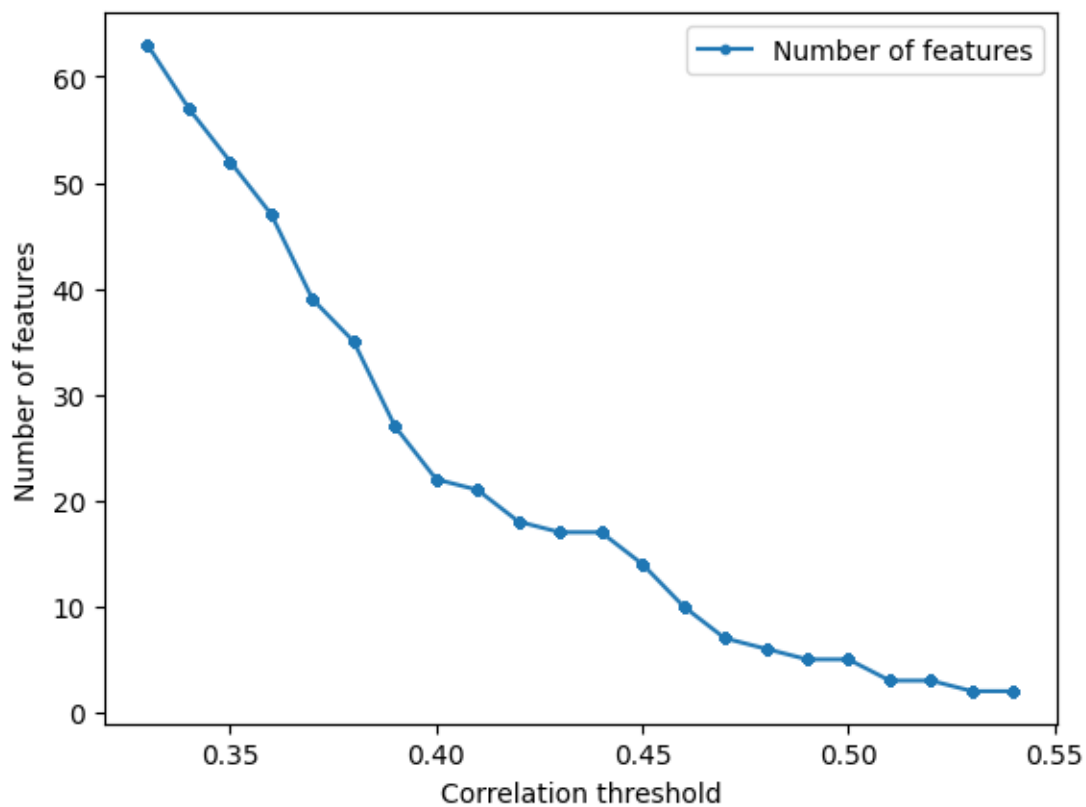

[ ]:

### 3 Random Forest

```
[21]: without_standardization, train_r2_, test_r2_, hist1, hist2, target_column_name,
      ↪ training_data_RMSE, test_data_RMSE = pred_model.
      ↪ prepare_data_and_create_model(molecular_descriptors_df=data,
      ↪
      ↪         correlation_threshold=0.50,
      ↪
      ↪         standardization=False,
      ↪
      ↪         model_type='RandomForestRegressor',
      ↪
      ↪         n_estimators=12,
      ↪
      ↪         target_column_name = target,
      ↪
      ↪         random_state=random_state,
```



```

↪          train_test_split_=True,
↪          verbose=True)

```

I am not doing standardization...

```

molecular descriptor name
0          AATSOZ
1          AATSOare
2          AATSOd
3          AATSOdv
4          AATSOi
molecular descriptor name  corr_value
0          AATSOZ      -0.027037
1          AATSOare    -0.129823
2          AATSOd       0.042740
3          AATSOdv     -0.120173
4          AATSOi       0.132395
molecular descriptor name  corr_value  absolute correlation value
0          AATSOZ      -0.027037          0.027037
1          AATSOare    -0.129823          0.129823
2          AATSOd       0.042740          0.042740
3          AATSOdv     -0.120173          0.120173
4          AATSOi       0.132395          0.132395
molecular descriptor name  corr_value  absolute correlation value
226          AMID_0      -0.524157          0.524157
505          EState_VSA5 -0.579664          0.579664
791          MDEO-12     -0.558727          0.558727
851          NdssC       -0.506855          0.506855
1091         VSA_EState5  0.503578          0.503578
molecular descriptor name  corr_value  absolute correlation value
226          AMID_0      -0.524157          0.524157
505          EState_VSA5 -0.579664          0.579664
791          MDEO-12     -0.558727          0.558727
851          NdssC       -0.506855          0.506855
1091         VSA_EState5  0.503578          0.503578
The model used is: RandomForest...
Return the coefficient of determination of the prediction:
0.4902931070613592
R^2 score: 0.9026786871770149
Correlation coefficient: 0.9500940412280329
Test data - unseen during training:
R^2 score: 0.4902931070613592
Correlation coefficient: 0.7002093308870992
[7.79645131 5.79278282 7.45510343 8.06465388 8.34997349 7.48588561
 8.07372575 7.34615379 7.92162209 8.08270908 7.89558771 8.2638769
 8.11810739 7.50814976 7.9828299 8.30277519 6.69346735 5.57950951]
102      8.000000

```

```
38      6.104025
8       6.044360
109     7.886057
11      8.107905
51      8.000000
88      8.886057
21      7.554396
82      8.301030
98      7.568636
58      7.677781
64      8.327902
74      8.070581
103     8.136677
91     10.000000
43      7.886057
25      5.221704
30      6.315155
```

```
Name: LoVo, dtype: float64
```

```
Training Root Mean Square Error: 0.2703702477820712
```

```
Testing Root Mean Square Error: 0.7815053189241797
```

```
[22]: print(target_column_name+str('_transformed'))
      print(hist1[target_column_name].hist())
```

```
LoVo_transformed
```

```
AxesSubplot(0.125,0.11;0.775x0.77)
```

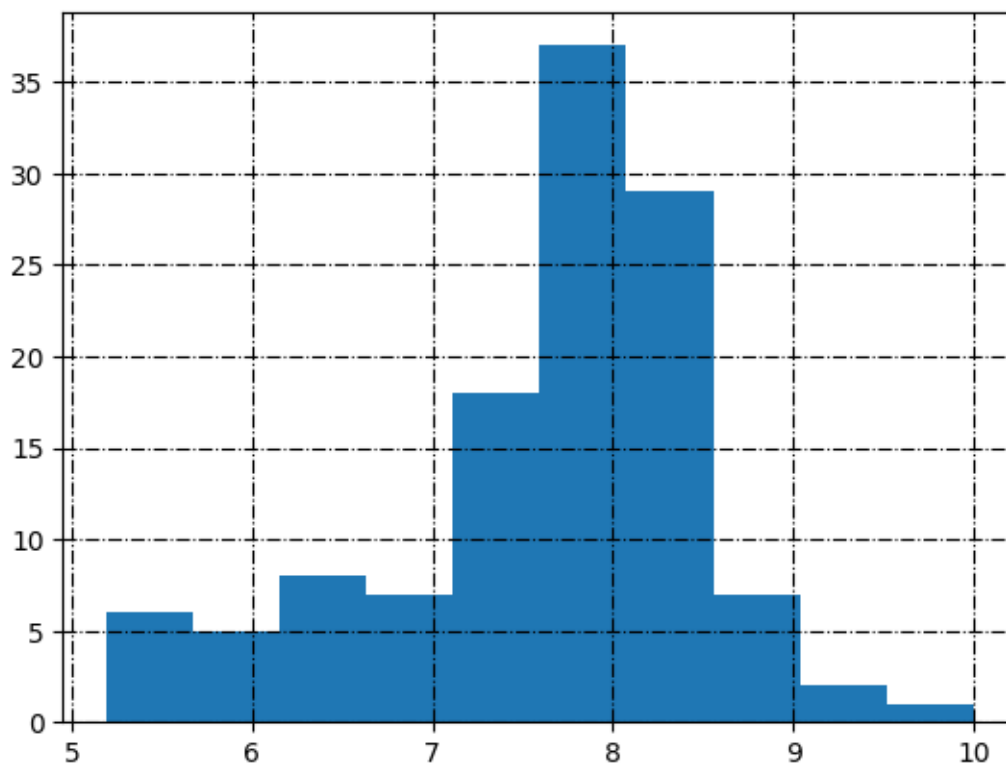

```
[23]: with_standardization, train_r2_, test_r2_, hist1, hist2, target_column_name,
      ↪ training_data_RMSE, test_data_RMSE = pred_model.
      ↪ prepare_data_and_create_model(molecular_descriptors_df=data,
      ↪
      ↪         correlation_threshold=0.50,
      ↪
      ↪         standardization=True,
      ↪
      ↪         model_type='RandomForestRegressor',
      ↪
      ↪         n_estimators=12,
      ↪
      ↪         target_column_name = target,
      ↪
      ↪         random_state=random_state,
      ↪
      ↪         train_test_split=True,
      ↪
      ↪         verbose=True)
```

I am doing standardization...  
molecular descriptor name

|      |                           |            |                            |
|------|---------------------------|------------|----------------------------|
| 0    | AATSOZ                    |            |                            |
| 1    | AATSOare                  |            |                            |
| 2    | AATSOd                    |            |                            |
| 3    | AATSOdv                   |            |                            |
| 4    | AATSOi                    |            |                            |
|      | molecular descriptor name | corr_value |                            |
| 0    | AATSOZ                    | -0.027037  |                            |
| 1    | AATSOare                  | -0.129823  |                            |
| 2    | AATSOd                    | 0.042740   |                            |
| 3    | AATSOdv                   | -0.120173  |                            |
| 4    | AATSOi                    | 0.132395   |                            |
|      | molecular descriptor name | corr_value | absolute correlation value |
| 0    | AATSOZ                    | -0.027037  | 0.027037                   |
| 1    | AATSOare                  | -0.129823  | 0.129823                   |
| 2    | AATSOd                    | 0.042740   | 0.042740                   |
| 3    | AATSOdv                   | -0.120173  | 0.120173                   |
| 4    | AATSOi                    | 0.132395   | 0.132395                   |
|      | molecular descriptor name | corr_value | absolute correlation value |
| 226  | AMID_0                    | -0.524157  | 0.524157                   |
| 505  | EState_VSA5               | -0.579664  | 0.579664                   |
| 791  | MDEO-12                   | -0.558727  | 0.558727                   |
| 851  | NdssC                     | -0.506855  | 0.506855                   |
| 1091 | VSA_EState5               | 0.503578   | 0.503578                   |
|      | molecular descriptor name | corr_value | absolute correlation value |
| 226  | AMID_0                    | -0.524157  | 0.524157                   |
| 505  | EState_VSA5               | -0.579664  | 0.579664                   |
| 791  | MDEO-12                   | -0.558727  | 0.558727                   |
| 851  | NdssC                     | -0.506855  | 0.506855                   |
| 1091 | VSA_EState5               | 0.503578   | 0.503578                   |

The model used is: RandomForest...

Return the coefficient of determination of the prediction:  
0.4902931070613592

R<sup>2</sup> score: 0.9026786871770149

Correlation coefficient: 0.9500940412280329

Test data - unseen during training:  
R<sup>2</sup> score: 0.4902931070613592

Correlation coefficient: 0.7002093308870992

[7.79645131 5.79278282 7.45510343 8.06465388 8.34997349 7.48588561  
8.07372575 7.34615379 7.92162209 8.08270908 7.89558771 8.2638769  
8.11810739 7.50814976 7.9828299 8.30277519 6.69346735 5.57950951]

|     |          |
|-----|----------|
| 102 | 8.000000 |
| 38  | 6.104025 |
| 8   | 6.044360 |
| 109 | 7.886057 |
| 11  | 8.107905 |
| 51  | 8.000000 |
| 88  | 8.886057 |
| 21  | 7.554396 |

```

82      8.301030
98      7.568636
58      7.677781
64      8.327902
74      8.070581
103     8.136677
91     10.000000
43      7.886057
25      5.221704
30      6.315155

```

Name: LoVo, dtype: float64

Training Root Mean Square Error: 0.2703702477820712

Testing Root Mean Square Error: 0.7815053189241797

### 3.1 Search inside correlation space

```

[24]: step = 0.01
initial_step = corr_low
last_step = corr_high
first_list = [x / 100.0 for x in range(int(initial_step*100),
    ↪int(last_step*100), int(step*100))]
n_estimators = [range(2,21,1)]
corr_th = []
second_list = []
third_list = []
fourth_l = []
fifth_l = []
f_list = []
fif_list = []
for i in first_list:

    for estimator in n_estimators[0]:

        without_standardization, train_r2, test_r2, _, h_, target_column_name,
    ↪training_data_RMSE, test_data_RMSE = pred_model.
    ↪prepare_data_and_create_model(molecular_descriptors_df=data,

    ↪                                correlation_threshold=i,

    ↪                                standardization=False,

    ↪                                model_type='RandomForestRegressor',

    ↪                                n_estimators_=estimator,

    ↪                                target_column_name = target,

```

```

    random_state=random_state,

    train_test_split_=True,

    verbose=False)
    corr_th.append(i)
    second_list.append(train_r2)
    third_list.append(test_r2)
    fourth_l.append(training_data_RMSE)
    fifth_l.append(test_data_RMSE)
    f_list.append(len(h_))
    fif_list.append(estimator)

```

```

[25]: df_without_standardization = pd.DataFrame(data=corr_th, columns=["Correlation_
    ↪threshold"])
df_without_standardization['Training data R^2 score'] = second_list
df_without_standardization['Test data R^2 score'] = third_list
df_without_standardization['Training RMSE'] = fourth_l
df_without_standardization['Test RMSE'] = fifth_l
df_without_standardization['Number of features'] = f_list
df_without_standardization['Number of estimators'] = fif_list

```

```

[26]: df_random_forest = df_without_standardization.copy()
#df_without_standardization.to_excel('../Data/
    ↪A549_Random_forest_rs_'+str(random_state)+'.xlsx')

```

```

[27]: corre_list = [x / 100.0 for x in range(int(initial_step*100),
    ↪int(last_step*100), int(0.01*100))]
for element in corre_list:
    element_ =
    ↪df_without_standardization[df_without_standardization['Correlation_
    ↪threshold'] == float(element)]
    plt.plot(element_['Number of estimators'], element_['Training data R^2_
    ↪score'], label = "Training data R^2 score", marker='v')
    plt.plot(element_['Number of estimators'], element_['Test data R^2 score'],
    ↪label = "Test data R^2 score", marker='D')
    plt.legend()
    plt.xlabel('Number of estimators -> correlation threshold: '+str(element)+'.'
    ↪\n Number of features: '+str(element_['Number of features'].iloc[0]))
    plt.xlim(max(element_['Number of estimators'])+1, min(element_['Number of_
    ↪estimators'])-1)
    plt.ylabel('R^2 score')
    plt.ylim([0, 1])
    plt.rc('grid', linestyle="-. ", color='black')
    plt.grid(True)

```

```
plt.show()
```

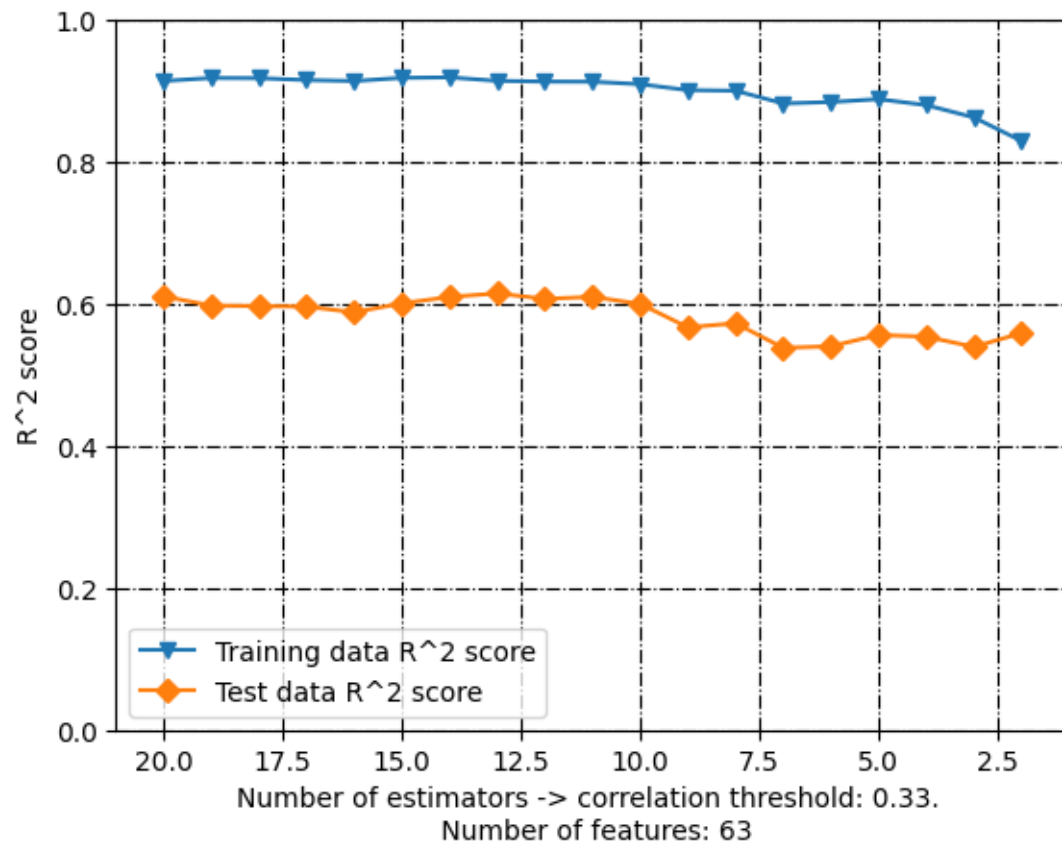

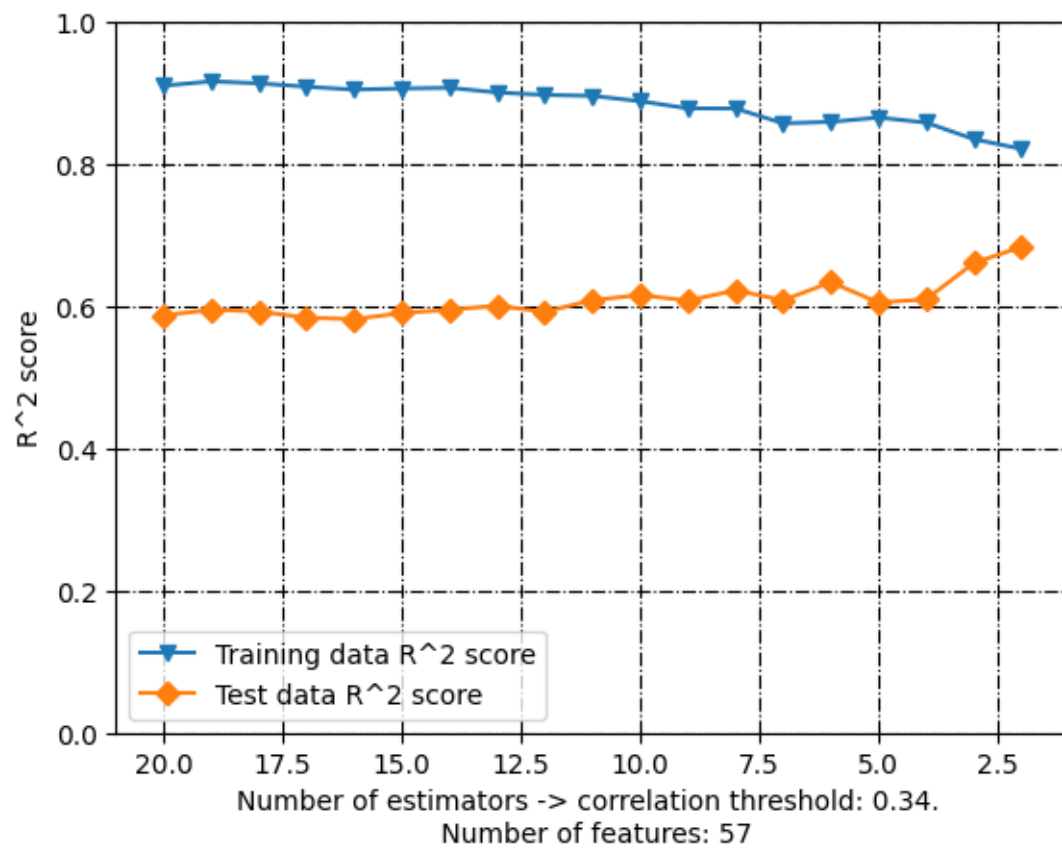



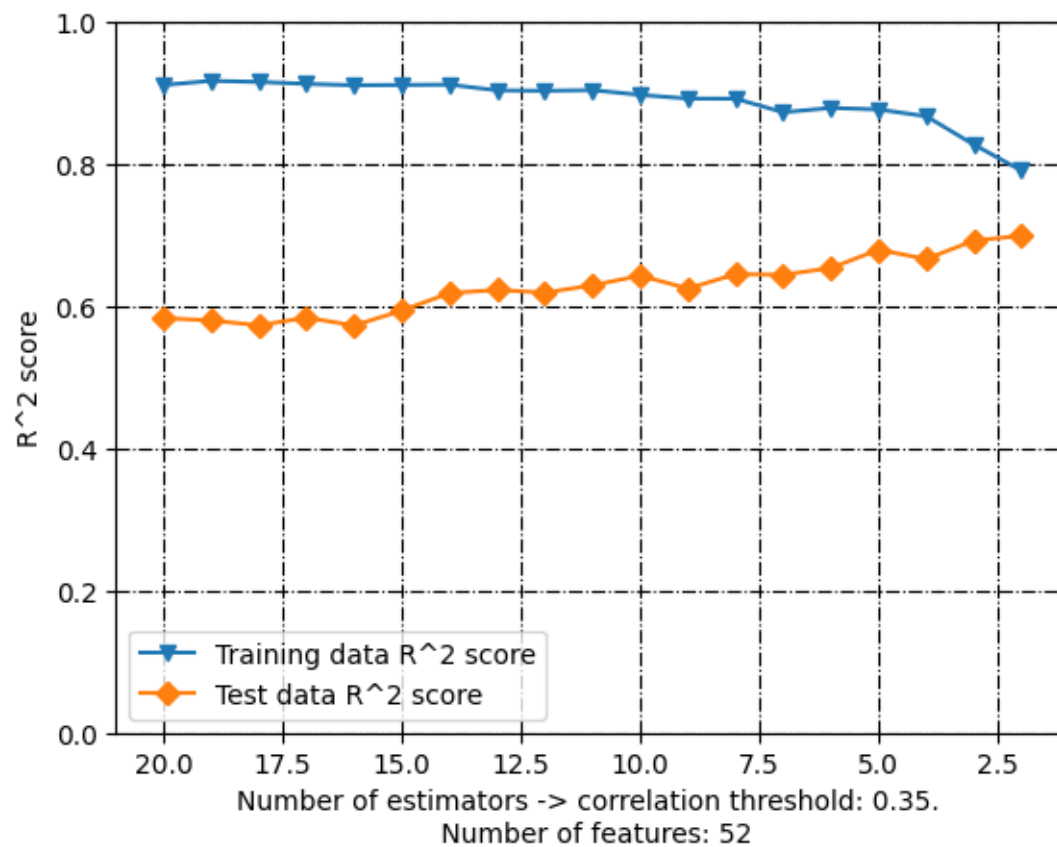

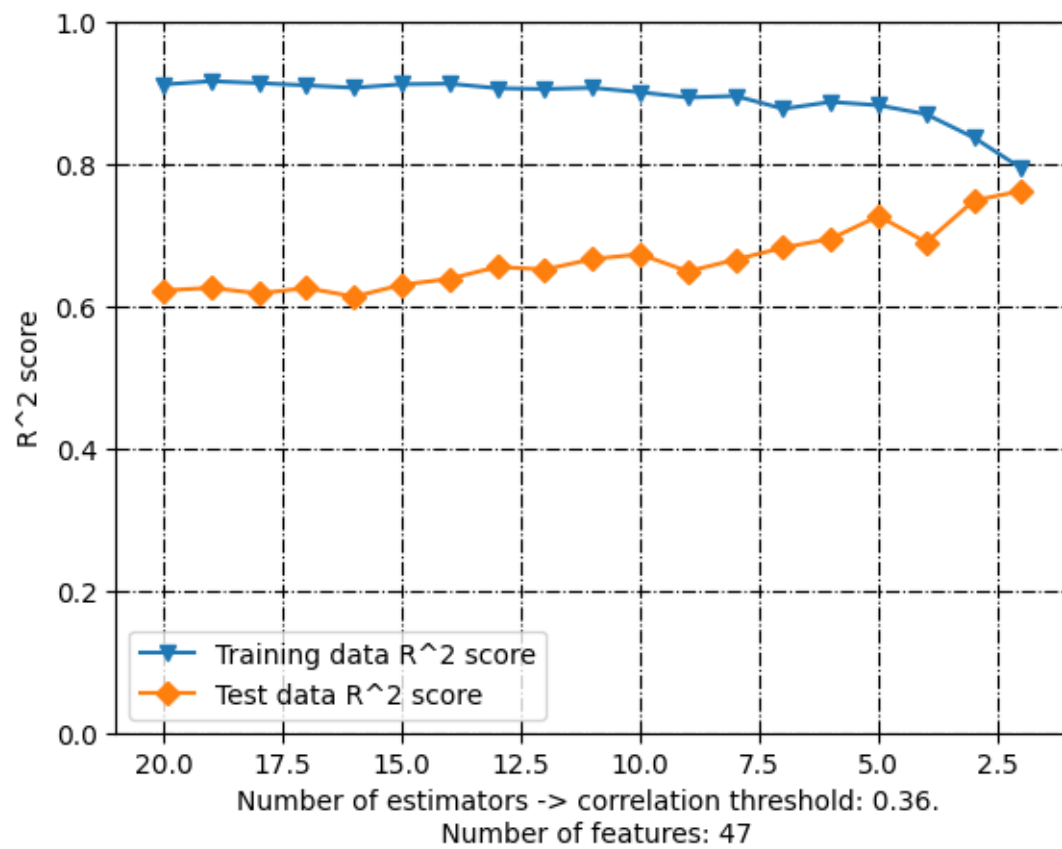

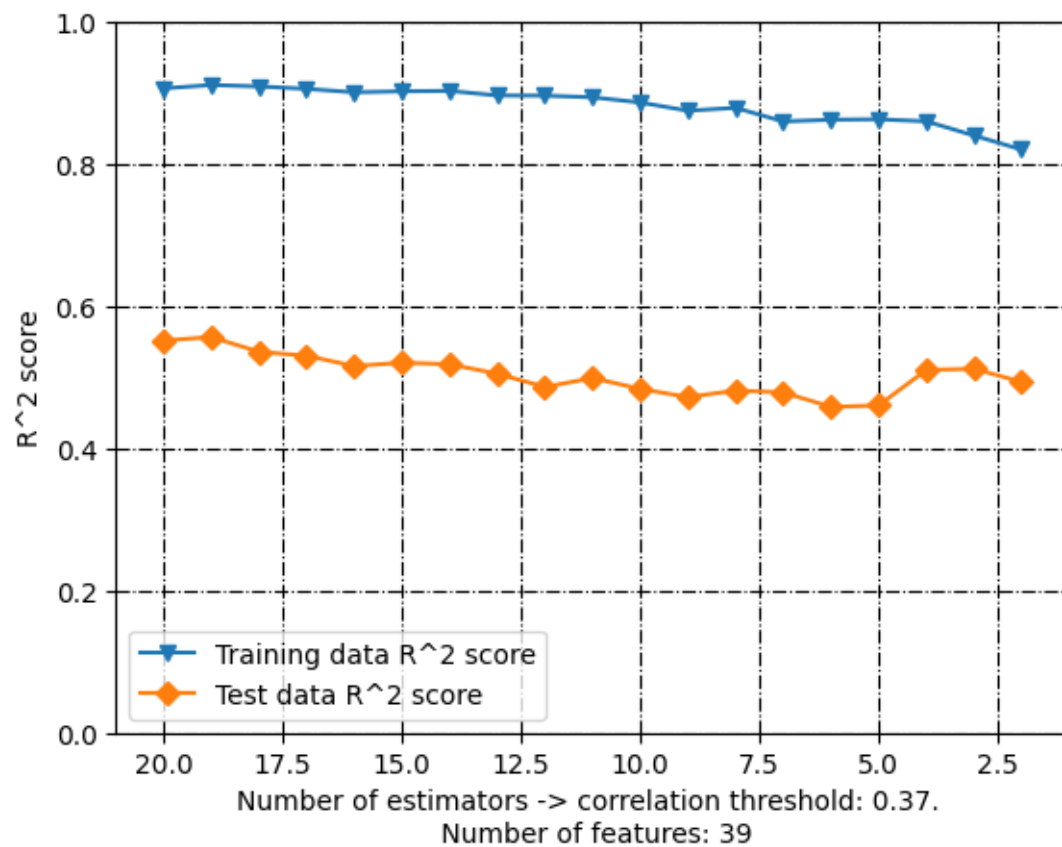

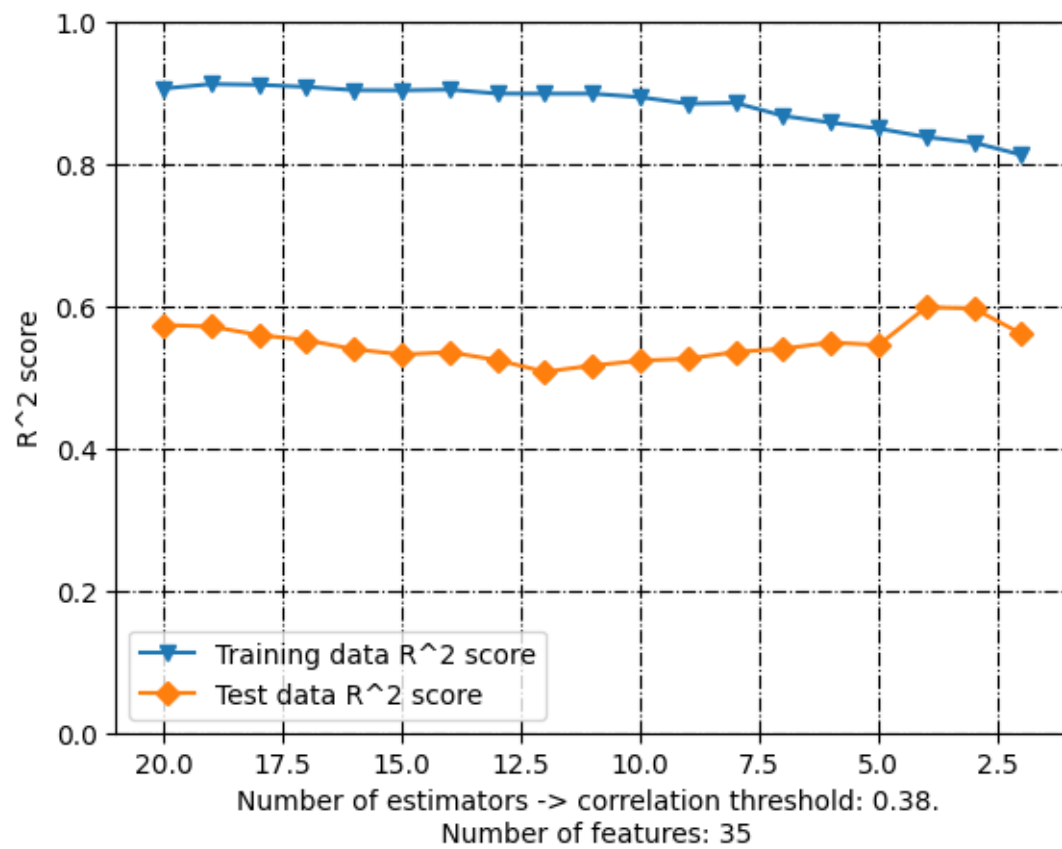

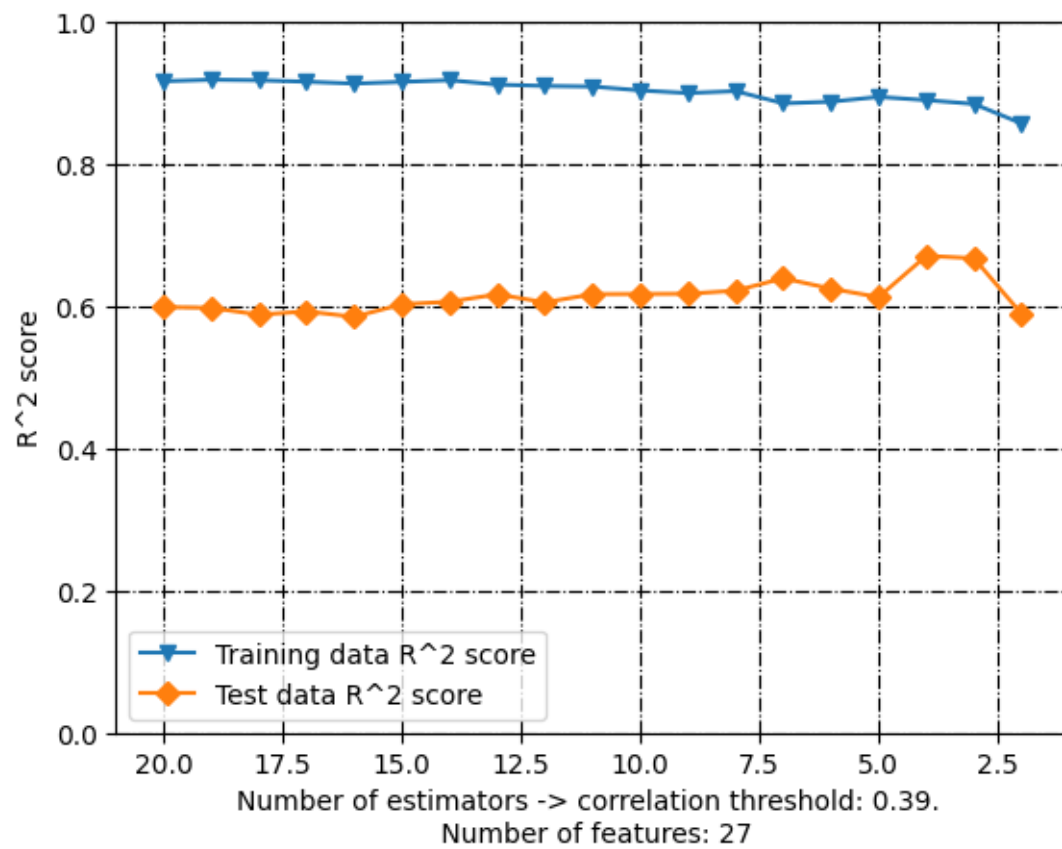

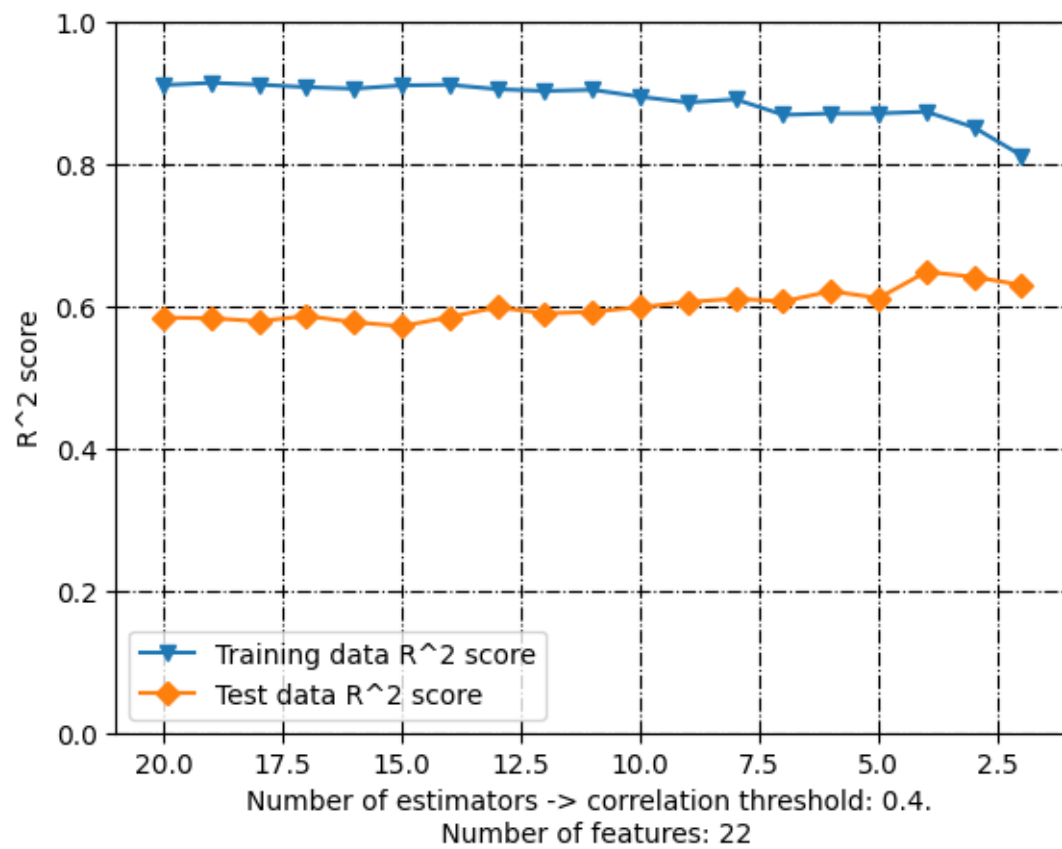

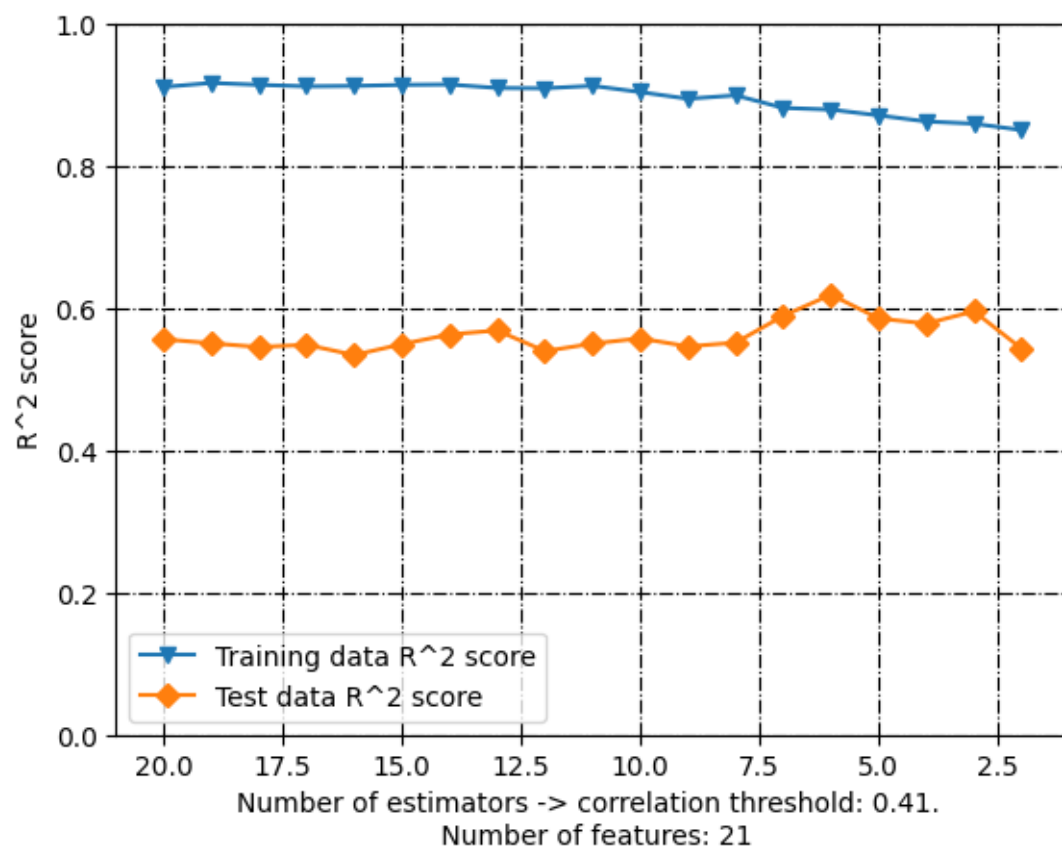

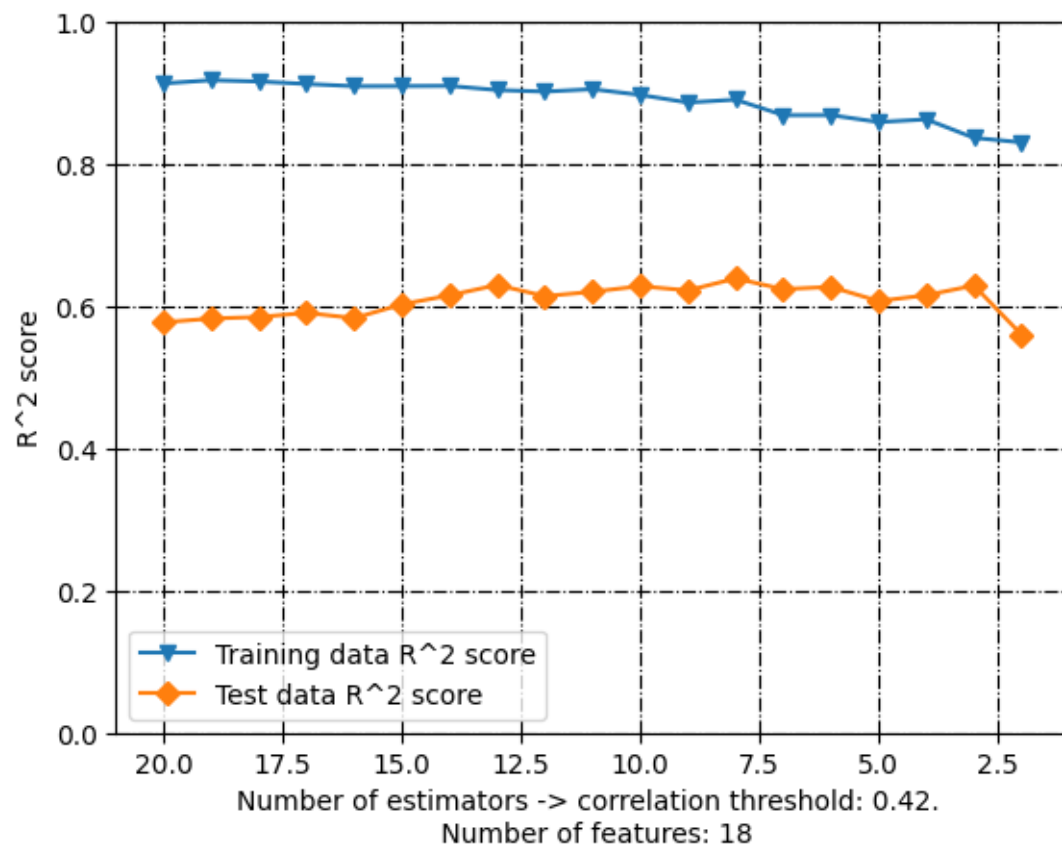



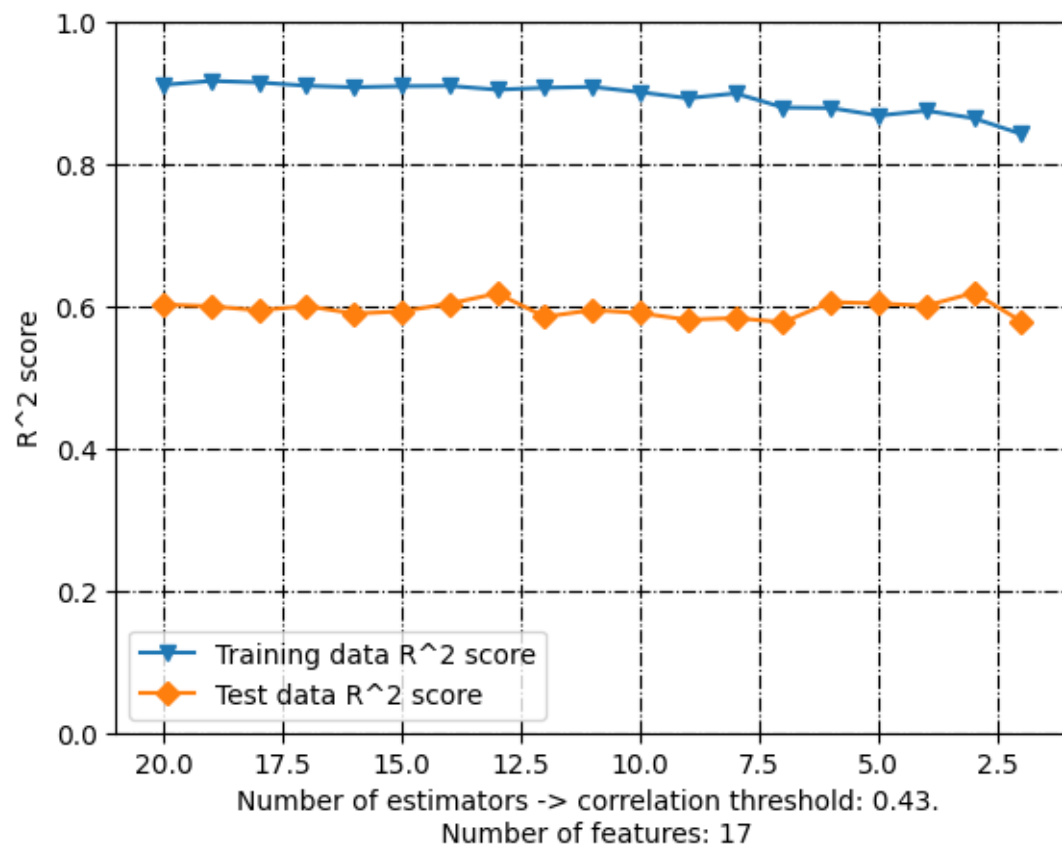

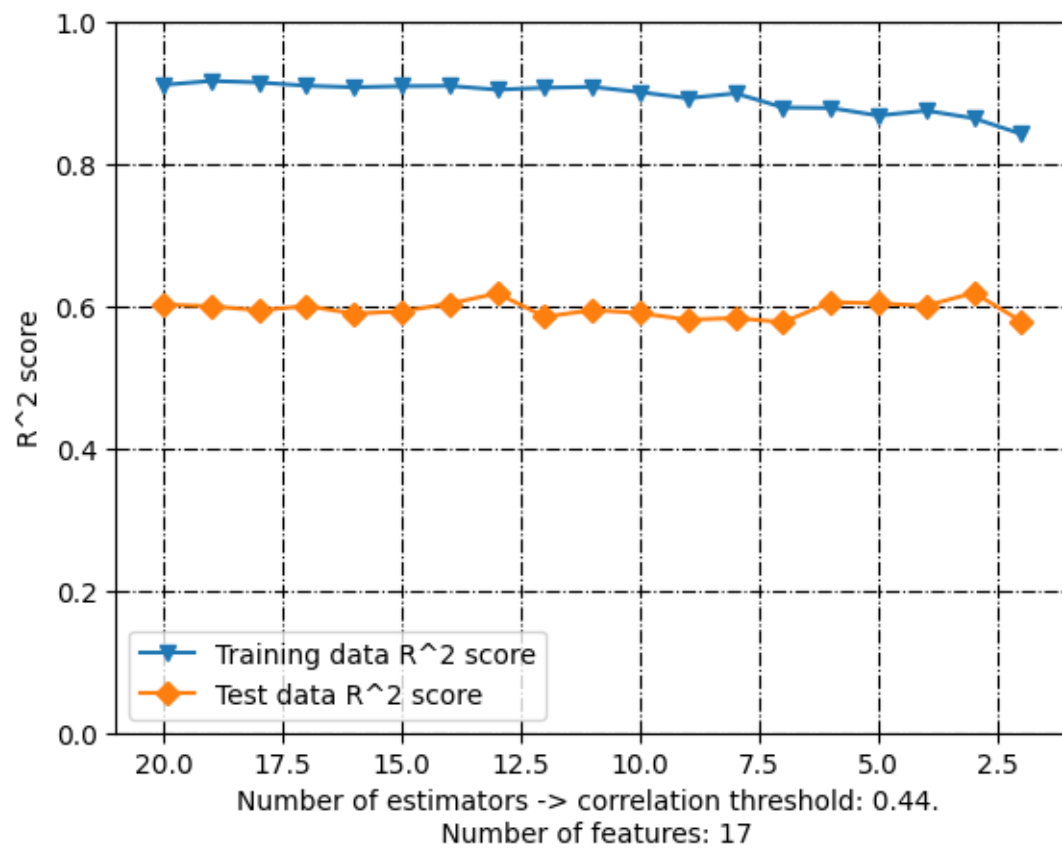

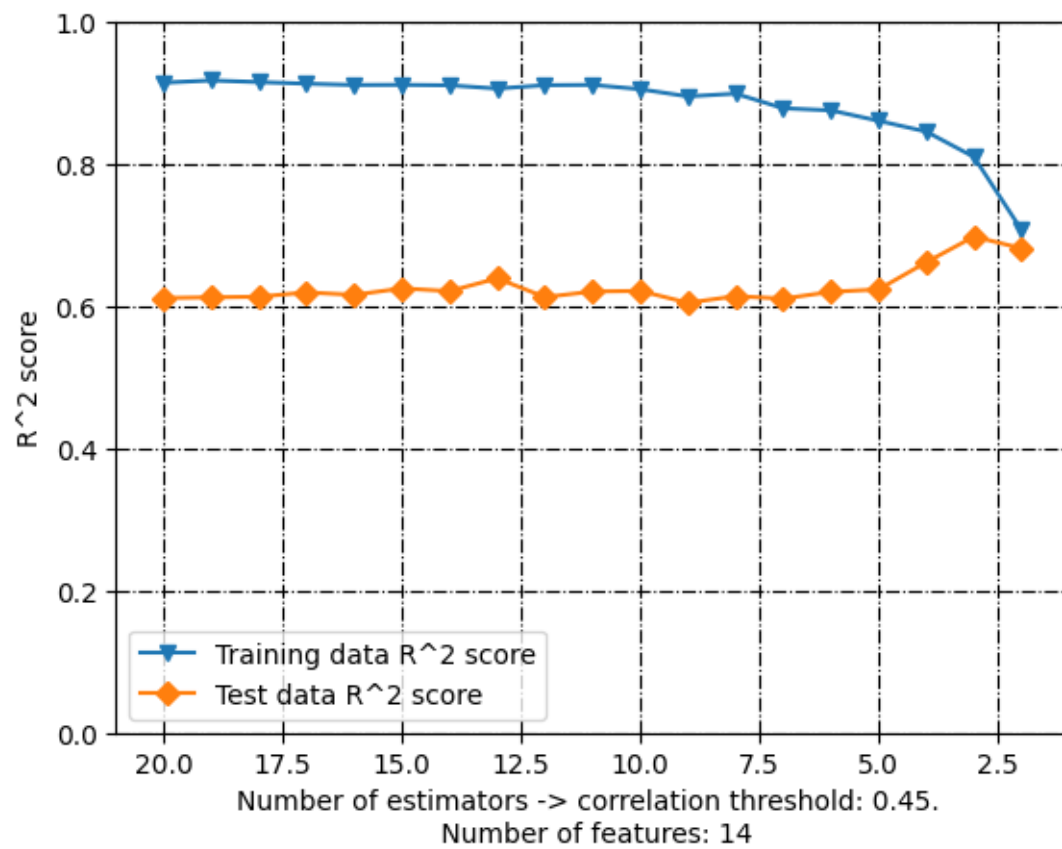

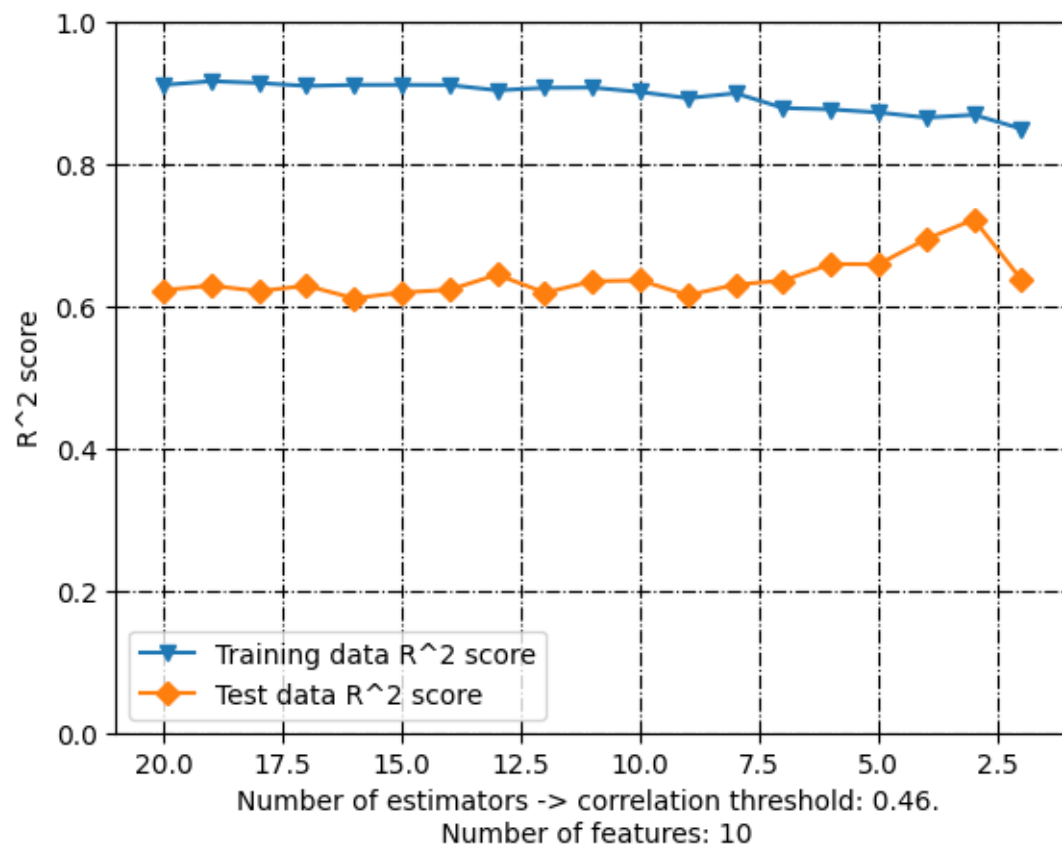

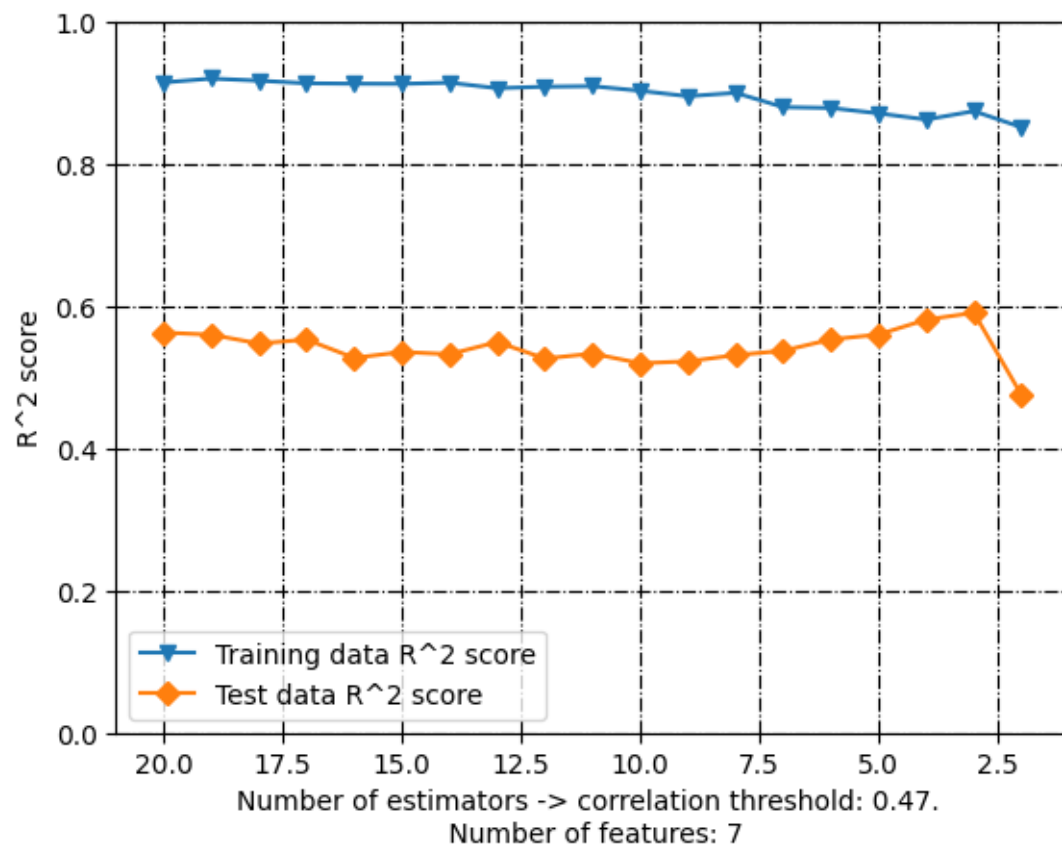

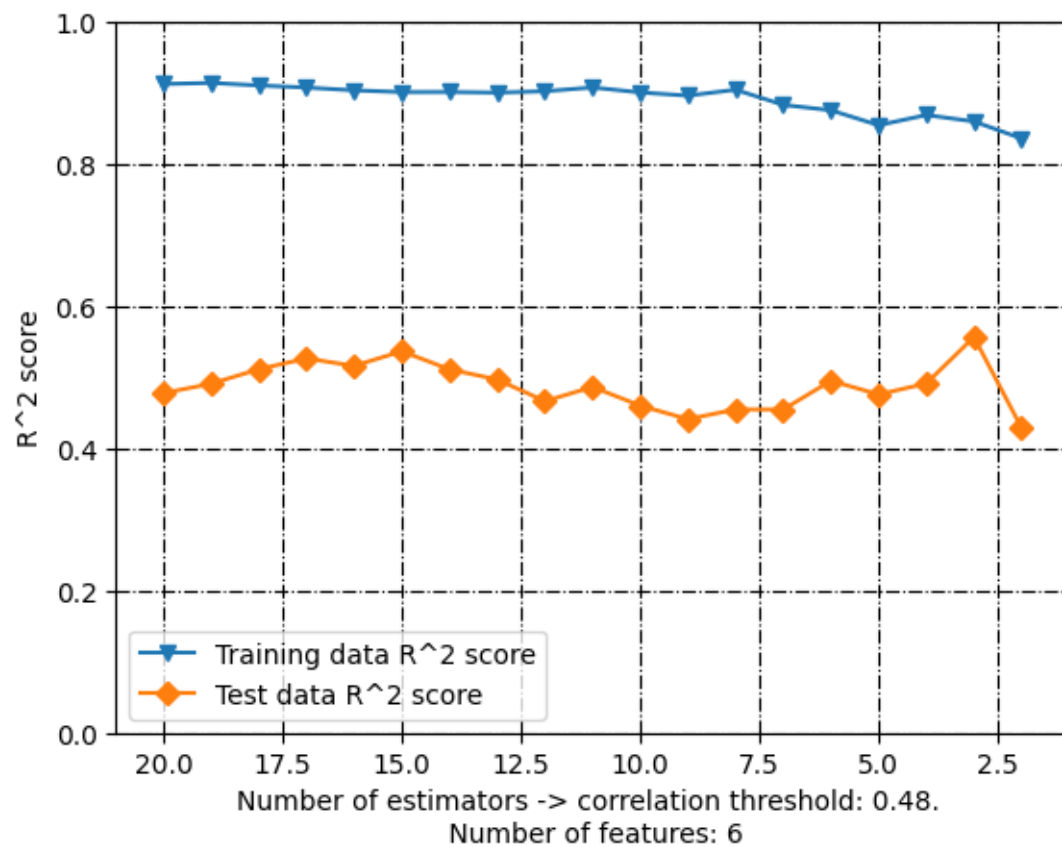

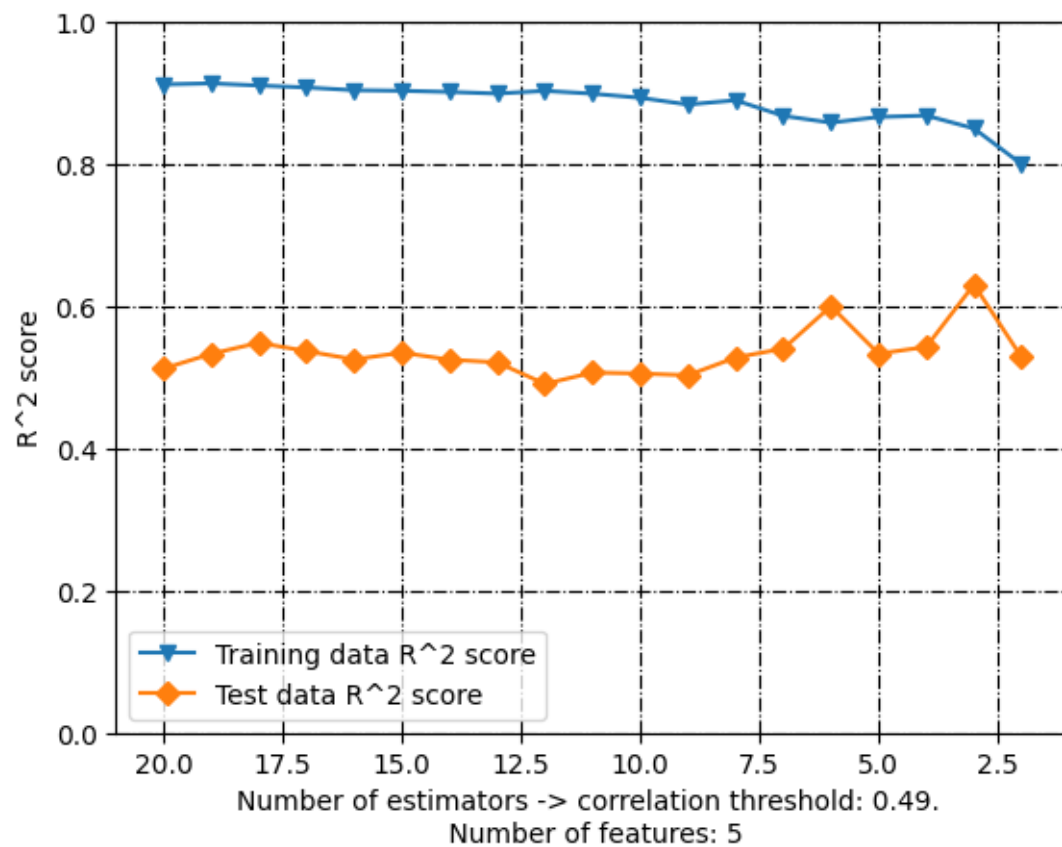

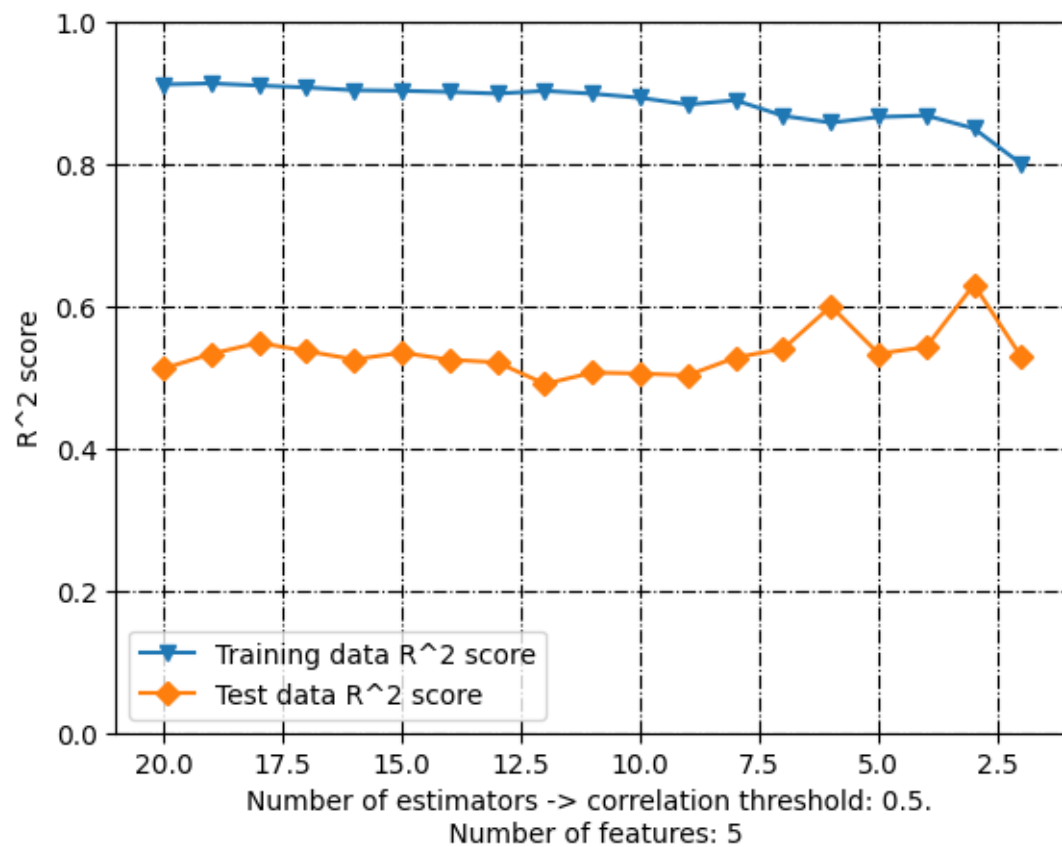



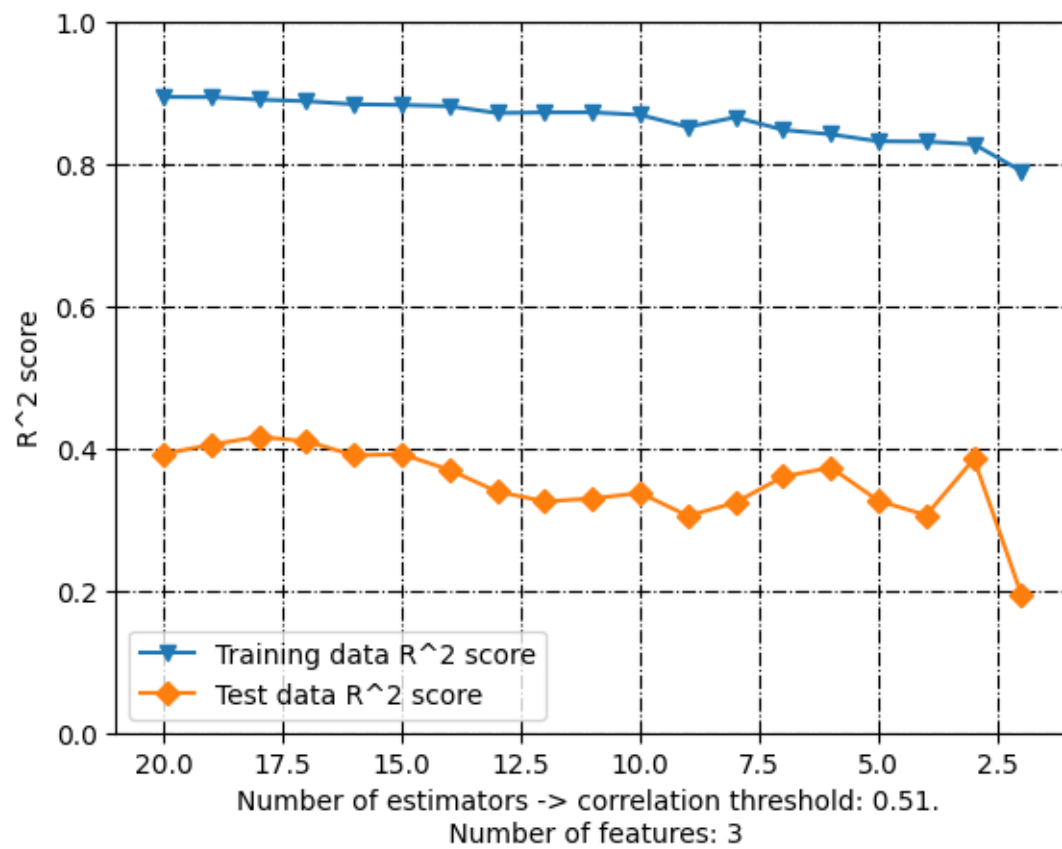

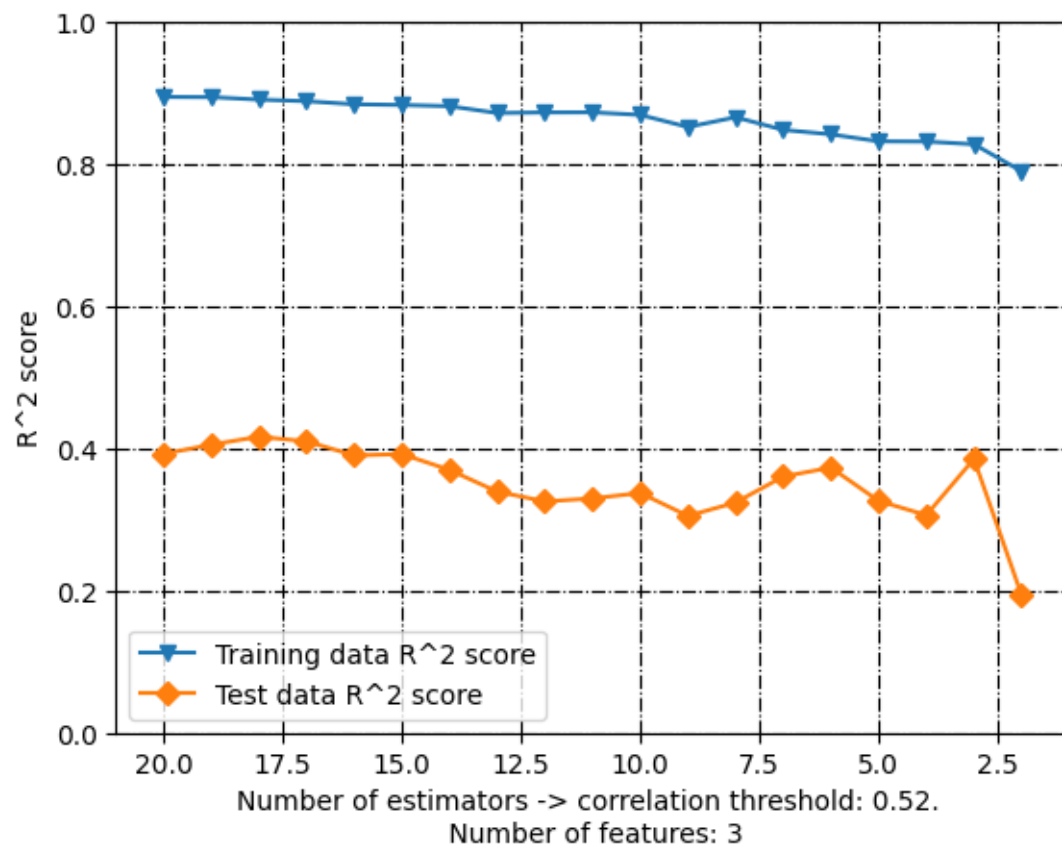

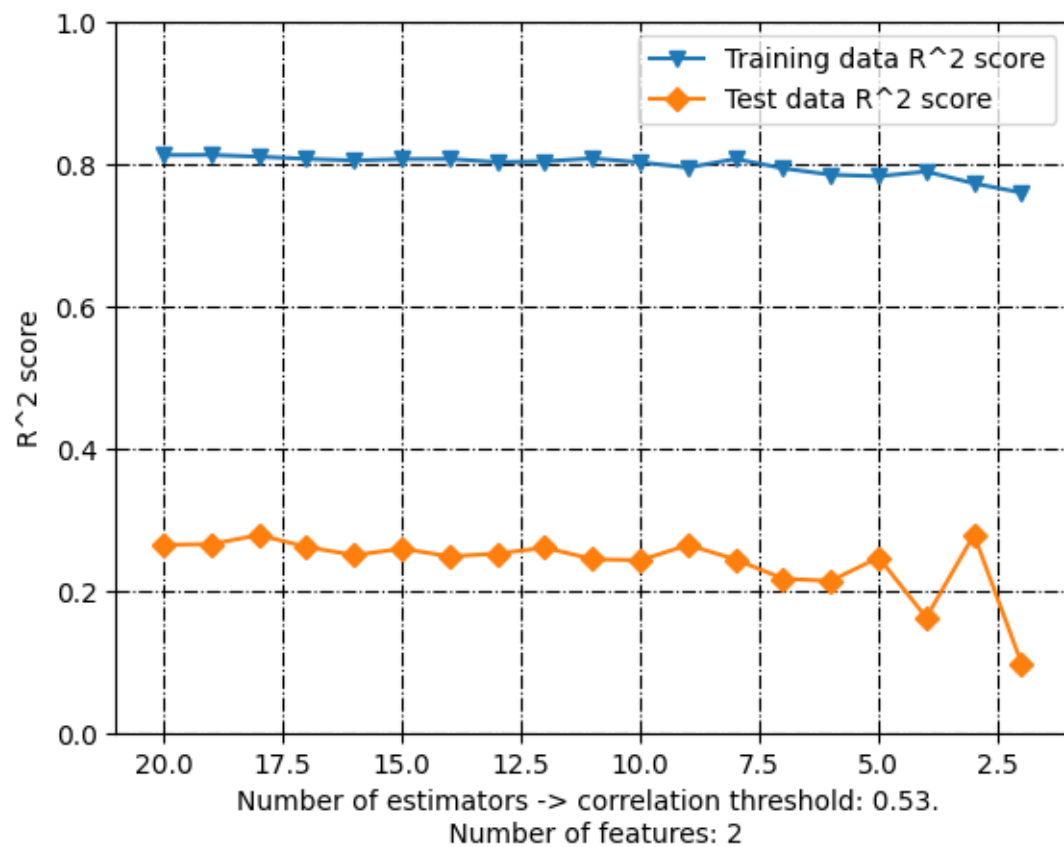

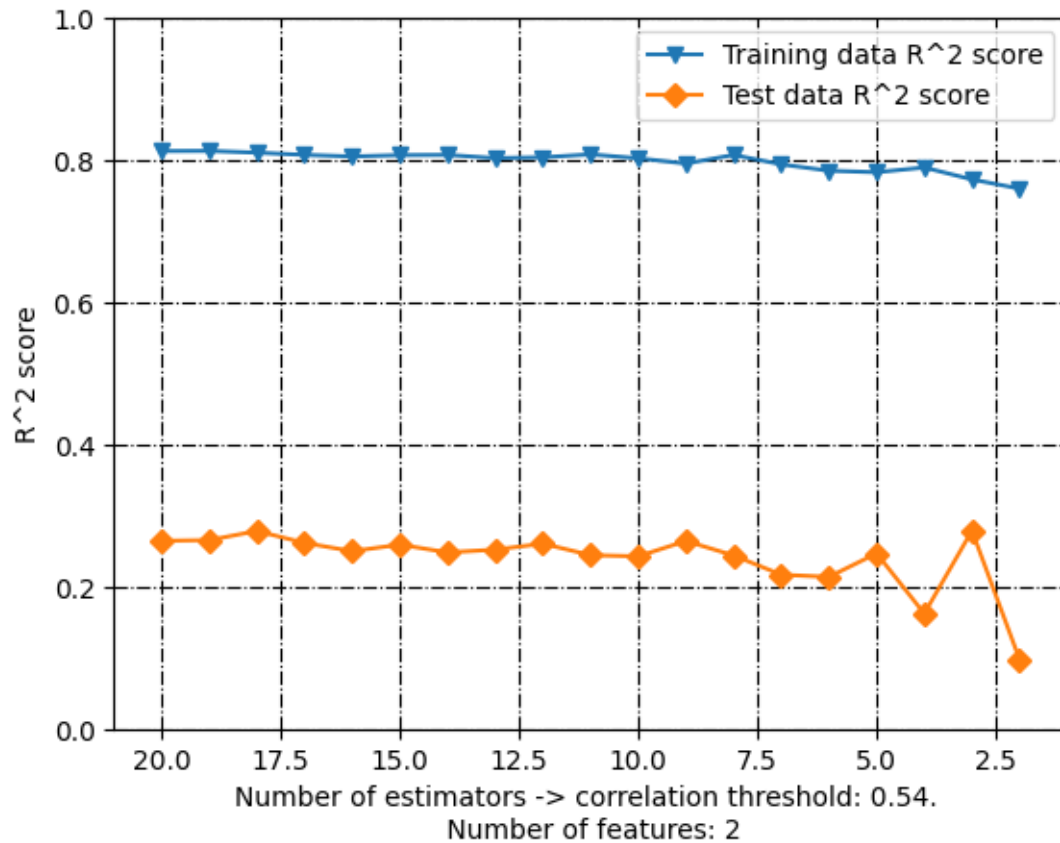

```
[28]: plt.plot(df_without_standardization['Correlation threshold'],
             df_without_standardization['Number of features'], label = "Number of
             features", marker='.')
plt.legend()
plt.xlabel('Correlation threshold')
plt.ylabel('Number of features')
plt.show()
```

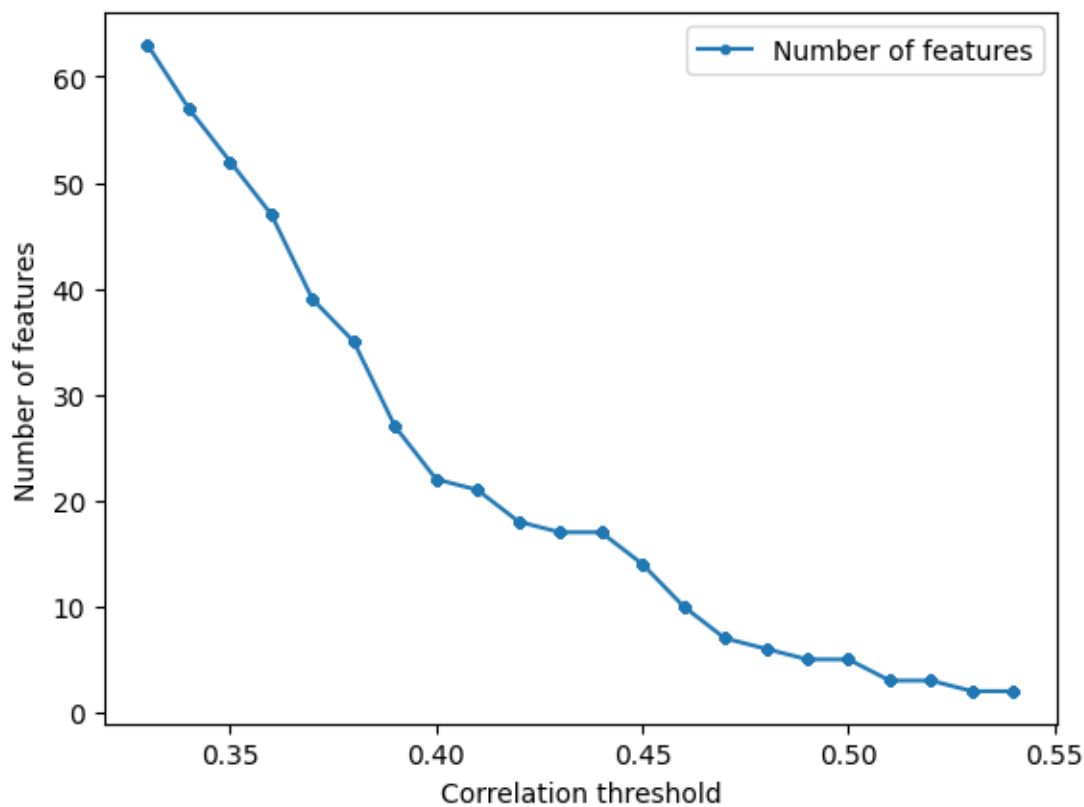

[ ]:

## 4 KNeighborsRegressor

```
[29]: without_standardization, train_r2_, test_r2_, hist1, hist2, target_column_name,
      ↪ training_data_RMSE, test_data_RMSE = pred_model.
      ↪ prepare_data_and_create_model(molecular_descriptors_df=data,
      ↪
      ↪         correlation_threshold=0.50,
      ↪
      ↪         standardization=False,
      ↪
      ↪         model_type='KNeighborsRegressor',
      ↪
      ↪         target_column_name = target,
      ↪
      ↪         random_state=random_state,
      ↪
      ↪         train_test_split_=True,
```



verbose=True)



I am not doing standardization...

```
molecular descriptor name
0          AATSOZ
1          AATSOare
2          AATSOd
3          AATSOdv
4          AATSOi
molecular descriptor name  corr_value
0          AATSOZ          -0.027037
1          AATSOare        -0.129823
2          AATSOd          0.042740
3          AATSOdv         -0.120173
4          AATSOi          0.132395
molecular descriptor name  corr_value  absolute correlation value
0          AATSOZ          -0.027037          0.027037
1          AATSOare        -0.129823          0.129823
2          AATSOd          0.042740          0.042740
3          AATSOdv         -0.120173          0.120173
4          AATSOi          0.132395          0.132395
molecular descriptor name  corr_value  absolute correlation value
226          AMID_0        -0.524157          0.524157
505          EState_VSA5   -0.579664          0.579664
791          MDEO-12       -0.558727          0.558727
851          NdssC         -0.506855          0.506855
1091         VSA_EState5    0.503578          0.503578
molecular descriptor name  corr_value  absolute correlation value
226          AMID_0        -0.524157          0.524157
505          EState_VSA5   -0.579664          0.579664
791          MDEO-12       -0.558727          0.558727
851          NdssC         -0.506855          0.506855
1091         VSA_EState5    0.503578          0.503578
The model used is: KNeighbors...
Return the coefficient of determination of the prediction:
0.6586264226909913
R^2 score: 0.5303397396133361
Correlation coefficient: 0.728244285671598
Test data - unseen during training:
R^2 score: 0.6586264226909913
Correlation coefficient: 0.8115580217649205
[7.6432074  5.89053092 6.36533707 7.81601169 7.75558072 7.79160373
 8.11146067 7.76925163 8.11146067 8.68333077 6.87389833 8.18032549
 8.52770052 7.70025454 8.35880539 8.11945778 6.24208266 6.68016526]
102      8.000000
38       6.104025
8        6.044360
```

```

109      7.886057
11       8.107905
51       8.000000
88       8.886057
21       7.554396
82       8.301030
98       7.568636
58       7.677781
64       8.327902
74       8.070581
103      8.136677
91      10.000000
43       7.886057
25       5.221704
30       6.315155
Name: LoVo, dtype: float64
Training Root Mean Square Error: 0.5939458154815481
Testing Root Mean Square Error: 0.639567867727069

```

```

[30]: print(target_column_name+str('_transformed'))
      print(hist1[target_column_name].hist())

```

```

LoVo_transformed
AxesSubplot(0.125,0.11;0.775x0.77)

```

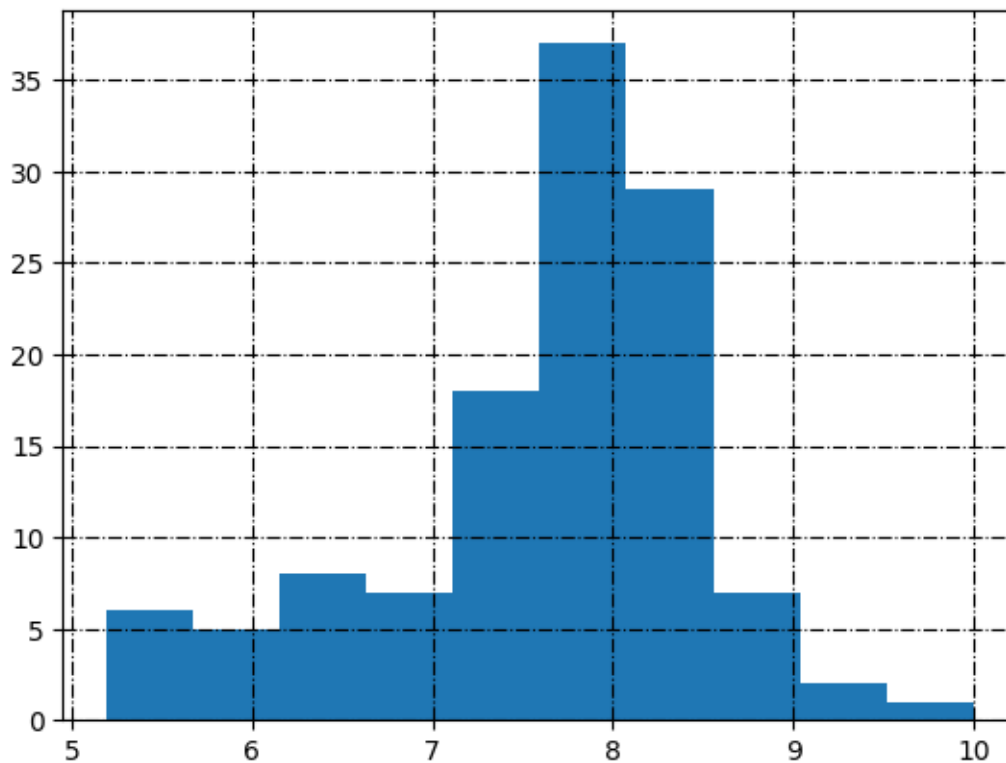

```
[31]: with_standardization, train_r2_, test_r2_, hist1, hist2, target_column_name,
      ↪ training_data_RMSE, test_data_RMSE = pred_model.
      ↪ prepare_data_and_create_model(molecular_descriptors_df=data,
      ↪
      ↪         correlation_threshold=0.50,
      ↪
      ↪         standardization=True,
      ↪
      ↪         model_type='KNeighborsRegressor',
      ↪
      ↪         target_column_name = target,
      ↪
      ↪         random_state=random_state,
      ↪
      ↪         train_test_split_=True,
      ↪
      ↪         verbose=True)
```

I am doing standardization...

|      | molecular descriptor name |            |                            |
|------|---------------------------|------------|----------------------------|
| 0    | AATS0Z                    |            |                            |
| 1    | AATS0are                  |            |                            |
| 2    | AATS0d                    |            |                            |
| 3    | AATS0dv                   |            |                            |
| 4    | AATS0i                    |            |                            |
|      | molecular descriptor name | corr_value |                            |
| 0    | AATS0Z                    | -0.027037  |                            |
| 1    | AATS0are                  | -0.129823  |                            |
| 2    | AATS0d                    | 0.042740   |                            |
| 3    | AATS0dv                   | -0.120173  |                            |
| 4    | AATS0i                    | 0.132395   |                            |
|      | molecular descriptor name | corr_value | absolute correlation value |
| 0    | AATS0Z                    | -0.027037  | 0.027037                   |
| 1    | AATS0are                  | -0.129823  | 0.129823                   |
| 2    | AATS0d                    | 0.042740   | 0.042740                   |
| 3    | AATS0dv                   | -0.120173  | 0.120173                   |
| 4    | AATS0i                    | 0.132395   | 0.132395                   |
|      | molecular descriptor name | corr_value | absolute correlation value |
| 226  | AMID_0                    | -0.524157  | 0.524157                   |
| 505  | EState_VSA5               | -0.579664  | 0.579664                   |
| 791  | MDE0-12                   | -0.558727  | 0.558727                   |
| 851  | NdssC                     | -0.506855  | 0.506855                   |
| 1091 | VSA_EState5               | 0.503578   | 0.503578                   |
|      | molecular descriptor name | corr_value | absolute correlation value |
| 226  | AMID_0                    | -0.524157  | 0.524157                   |
| 505  | EState_VSA5               | -0.579664  | 0.579664                   |



|      |             |           |          |
|------|-------------|-----------|----------|
| 791  | MDE0-12     | -0.558727 | 0.558727 |
| 851  | NdssC       | -0.506855 | 0.506855 |
| 1091 | VSA_EState5 | 0.503578  | 0.503578 |

The model used is: KNeighbors...

Return the coefficient of determination of the prediction:

0.6586264226909913

R<sup>2</sup> score: 0.5303397396133361

Correlation coefficient: 0.728244285671598

Test data - unseen during training:

R<sup>2</sup> score: 0.6586264226909913

Correlation coefficient: 0.8115580217649205

[7.6432074 5.89053092 6.36533707 7.81601169 7.75558072 7.79160373  
8.11146067 7.76925163 8.11146067 8.68333077 6.87389833 8.18032549  
8.52770052 7.70025454 8.35880539 8.11945778 6.24208266 6.68016526]

102 8.000000

38 6.104025

8 6.044360

109 7.886057

11 8.107905

51 8.000000

88 8.886057

21 7.554396

82 8.301030

98 7.568636

58 7.677781

64 8.327902

74 8.070581

103 8.136677

91 10.000000

43 7.886057

25 5.221704

30 6.315155

Name: LoVo, dtype: float64

Training Root Mean Square Error: 0.5939458154815481

Testing Root Mean Square Error: 0.639567867727069

#### 4.1 Search inside correlation space

```
[32]: step = 0.01
initial_step = corr_low
last_step = corr_high
first_list = [x / 100.0 for x in range(int(initial_step*100),
    ↪int(last_step*100), int(step*100))]
second_list = []
third_list = []
fourth_l = []
fifth_l = []
```

```

f_list = []
for i in first_list:
    without_standardization, train_r2, test_r2, _, h_, target_column_name, \
    ↪ training_data_RMSE, test_data_RMSE = pred_model.
    ↪ prepare_data_and_create_model(molecular_descriptors_df = data,

    ↪ correlation_threshold = i,

    ↪ standardization = False,

    ↪ model_type = 'KNeighborsRegressor',

    ↪ target_column_name = target,

    ↪ random_state=random_state,

    ↪ train_test_split_ = True,

    ↪ verbose = False)
    second_list.append(train_r2)
    third_list.append(test_r2)
    fourth_l.append(training_data_RMSE)
    fifth_l.append(test_data_RMSE)
    f_list.append(len(h_))

```

File "C:\Users\aleks\anaconda3\envs\cheminf\_gpu\lib\site-packages\joblib\externals\loky\backend\context.py", line 217, in \_count\_physical\_cores  
raise ValueError(

```

[33]: df_without_standardization = pd.DataFrame(data=first_list, \
    ↪ columns=["Correlation threshold"])
df_without_standardization['Training data R^2 score'] = second_list
df_without_standardization['Test data R^2 score'] = third_list
df_without_standardization['Training RMSE'] = fourth_l
df_without_standardization['Test RMSE'] = fifth_l
df_without_standardization['Number of features'] = f_list

```

```

[34]: df_k_nearest = df_without_standardization.copy()
df_without_standardization

```

```

[34]: Correlation threshold  Training data R^2 score  Test data R^2 score  \
0                0.33          0.471797          0.467040
1                0.34          0.471797          0.467040
2                0.35          0.621866          0.571927
3                0.36          0.621866          0.571927
4                0.37          0.591939          0.617980

```

|    |      |          |          |
|----|------|----------|----------|
| 5  | 0.38 | 0.602228 | 0.604400 |
| 6  | 0.39 | 0.595156 | 0.503138 |
| 7  | 0.40 | 0.616176 | 0.251338 |
| 8  | 0.41 | 0.616176 | 0.251338 |
| 9  | 0.42 | 0.626014 | 0.240570 |
| 10 | 0.43 | 0.621218 | 0.240034 |
| 11 | 0.44 | 0.621218 | 0.240034 |
| 12 | 0.45 | 0.606762 | 0.210415 |
| 13 | 0.46 | 0.573191 | 0.567609 |
| 14 | 0.47 | 0.547279 | 0.607128 |
| 15 | 0.48 | 0.531633 | 0.643283 |
| 16 | 0.49 | 0.530340 | 0.658626 |
| 17 | 0.50 | 0.530340 | 0.658626 |
| 18 | 0.51 | 0.523685 | 0.574992 |
| 19 | 0.52 | 0.523685 | 0.574992 |
| 20 | 0.53 | 0.474835 | 0.601116 |
| 21 | 0.54 | 0.474835 | 0.601116 |

|    | Training RMSE | Test RMSE | Number of features |
|----|---------------|-----------|--------------------|
| 0  | 0.629876      | 0.799133  | 63                 |
| 1  | 0.629876      | 0.799133  | 57                 |
| 2  | 0.532940      | 0.716194  | 52                 |
| 3  | 0.532940      | 0.716194  | 47                 |
| 4  | 0.553627      | 0.676573  | 39                 |
| 5  | 0.546603      | 0.688493  | 35                 |
| 6  | 0.551441      | 0.771595  | 27                 |
| 7  | 0.536934      | 0.947141  | 22                 |
| 8  | 0.536934      | 0.947141  | 21                 |
| 9  | 0.530008      | 0.953928  | 18                 |
| 10 | 0.533396      | 0.954264  | 17                 |
| 11 | 0.533396      | 0.954264  | 17                 |
| 12 | 0.543479      | 0.972683  | 14                 |
| 13 | 0.566203      | 0.719797  | 10                 |
| 14 | 0.583136      | 0.686116  | 7                  |
| 15 | 0.593127      | 0.653783  | 6                  |
| 16 | 0.593946      | 0.639568  | 5                  |
| 17 | 0.593946      | 0.639568  | 5                  |
| 18 | 0.598139      | 0.713625  | 3                  |
| 19 | 0.598139      | 0.713625  | 3                  |
| 20 | 0.628063      | 0.691345  | 2                  |
| 21 | 0.628063      | 0.691345  | 2                  |

## 4.2 Plots

```
[35]: plt.plot(df_without_standardization['Correlation threshold'],  
             df_without_standardization['Training data R^2 score'], label = "Training_  
             data R^2 score", marker='v')  
plt.plot(df_without_standardization['Correlation threshold'],  
         df_without_standardization['Test data R^2 score'], label = "Test data R^2_  
         score", marker='D')  
plt.legend()  
plt.xlabel('Correlation threshold')  
plt.ylabel('R^2 score')  
plt.ylim([0, 1])  
plt.show()
```

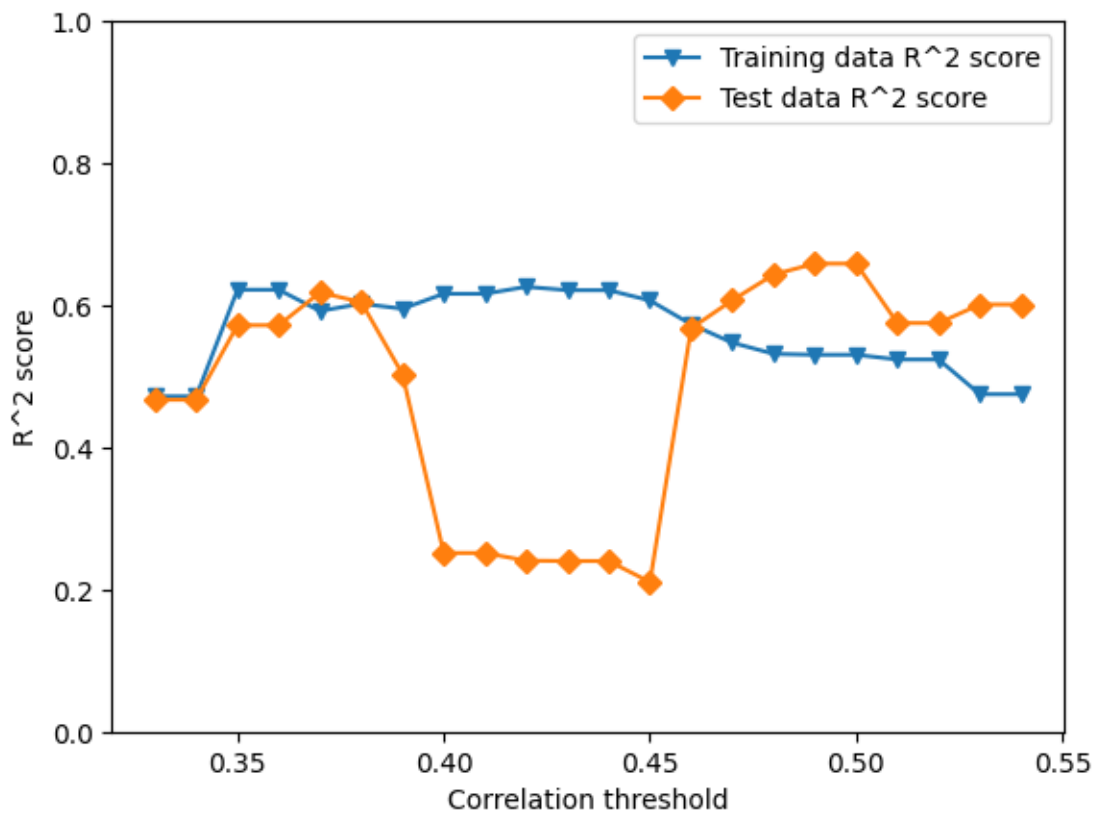

```
[36]: plt.plot(df_without_standardization['Correlation threshold'],  
             df_without_standardization['Number of features'], label = "Number of_  
             features", marker='.')  
plt.legend()  
plt.xlabel('Correlation threshold')  
plt.ylabel('Number of features')  
plt.show()
```



[ ]:

## 5 Support Vector Machines (SVM)

```
[37]: without_standardization, train_r2_, test_r2_, hist1, hist2, target_column_name,
      ↪ training_data_RMSE, test_data_RMSE = pred_model.
      ↪ prepare_data_and_create_model(molecular_descriptors_df=data,
      ↪
      ↪         correlation_threshold=0.50,
      ↪
      ↪         standardization=False,
      ↪
      ↪         model_type='SVR',
      ↪
      ↪         kernel_ = 'linear',
      ↪
      ↪         gamma_ = 'auto',
      ↪
      ↪         target_column_name = target,
```

```

↪          random_state=random_state,
↪          train_test_split_=True,
↪          verbose=True)

```

I am not doing standardization...

|   | molecular descriptor name |  |
|---|---------------------------|--|
| 0 | AATSOZ                    |  |
| 1 | AATSOare                  |  |
| 2 | AATSOd                    |  |
| 3 | AATSOdv                   |  |
| 4 | AATSOi                    |  |

  

|   | molecular descriptor name | corr_value |
|---|---------------------------|------------|
| 0 | AATSOZ                    | -0.027037  |
| 1 | AATSOare                  | -0.129823  |
| 2 | AATSOd                    | 0.042740   |
| 3 | AATSOdv                   | -0.120173  |
| 4 | AATSOi                    | 0.132395   |

  

|   | molecular descriptor name | corr_value | absolute correlation value |
|---|---------------------------|------------|----------------------------|
| 0 | AATSOZ                    | -0.027037  | 0.027037                   |
| 1 | AATSOare                  | -0.129823  | 0.129823                   |
| 2 | AATSOd                    | 0.042740   | 0.042740                   |
| 3 | AATSOdv                   | -0.120173  | 0.120173                   |
| 4 | AATSOi                    | 0.132395   | 0.132395                   |

  

|      | molecular descriptor name | corr_value | absolute correlation value |
|------|---------------------------|------------|----------------------------|
| 226  | AMID_0                    | -0.524157  | 0.524157                   |
| 505  | EState_VSA5               | -0.579664  | 0.579664                   |
| 791  | MDEO-12                   | -0.558727  | 0.558727                   |
| 851  | NdssC                     | -0.506855  | 0.506855                   |
| 1091 | VSA_EState5               | 0.503578   | 0.503578                   |

  

|      | molecular descriptor name | corr_value | absolute correlation value |
|------|---------------------------|------------|----------------------------|
| 226  | AMID_0                    | -0.524157  | 0.524157                   |
| 505  | EState_VSA5               | -0.579664  | 0.579664                   |
| 791  | MDEO-12                   | -0.558727  | 0.558727                   |
| 851  | NdssC                     | -0.506855  | 0.506855                   |
| 1091 | VSA_EState5               | 0.503578   | 0.503578                   |

The model used is: SVR...

Return the coefficient of determination of the prediction:

0.537072682454653

R<sup>2</sup> score: 0.45036618843522247

Correlation coefficient: 0.6710932784905705

Test data - unseen during training:

R<sup>2</sup> score: 0.537072682454653

Correlation coefficient: 0.7328524288386121

[7.85699147 6.58053324 7.30668225 7.92226268 7.95876083 8.18224156

```

8.33410513 7.96378315 8.2076654 7.75689871 6.93246836 7.70691664
7.69093605 7.85065507 8.19210208 8.18838247 6.95968616 6.46641962]
102      8.000000
38       6.104025
8        6.044360
109      7.886057
11       8.107905
51       8.000000
88       8.886057
21       7.554396
82       8.301030
98       7.568636
58       7.677781
64       8.327902
74       8.070581
103      8.136677
91      10.000000
43       7.886057
25       5.221704
30       6.315155
Name: LoVo, dtype: float64
Training Root Mean Square Error: 0.6425273818962154
Testing Root Mean Square Error: 0.744780143630552

```

```

[38]: print(target_column_name+str('_transformed'))
      print(hist1[target_column_name].hist())

```

```

LoVo_transformed
AxesSubplot(0.125,0.11;0.775x0.77)

```

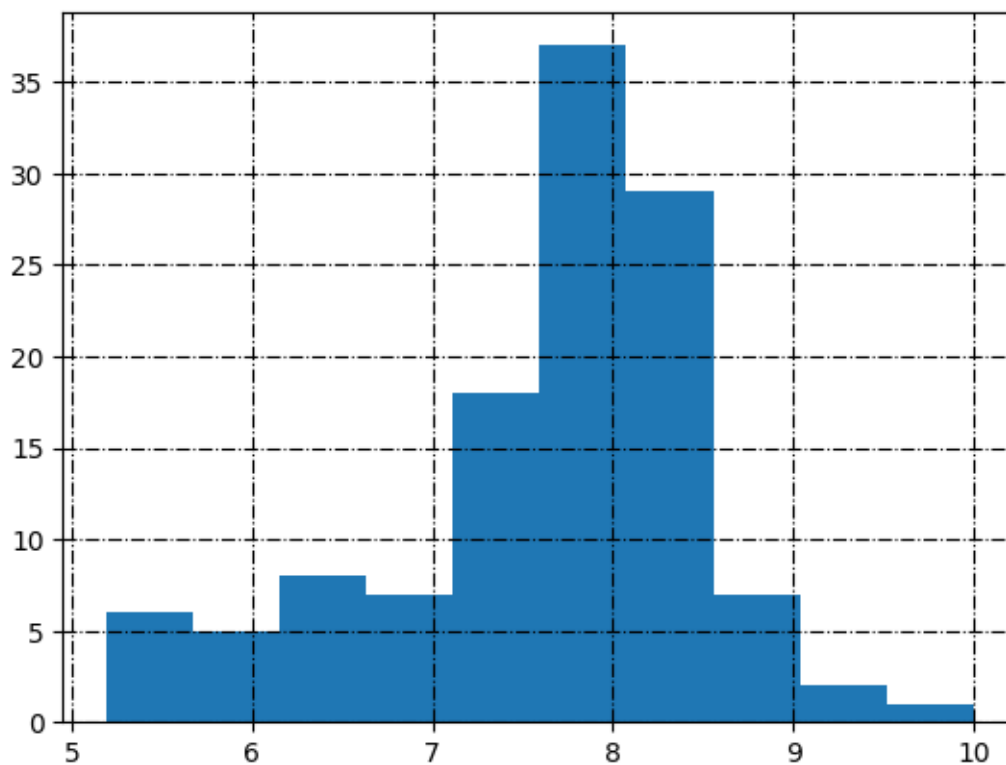

```
[39]: with_standardization, train_r2_, test_r2_, hist1, hist2, target_column_name,
      ↪ training_data_RMSE, test_data_RMSE = pred_model.
      ↪ prepare_data_and_create_model(molecular_descriptors_df=data,
      ↪
      ↪         correlation_threshold=0.50,
      ↪
      ↪         standardization=True,
      ↪
      ↪         model_type='SVR',
      ↪
      ↪         kernel_ = 'linear',
      ↪
      ↪         gamma_ = 'auto',
      ↪
      ↪         target_column_name = target,
      ↪
      ↪         random_state=random_state,
      ↪
      ↪         train_test_split_=True,
      ↪
      ↪         verbose=True)
```



I am doing standardization...

molecular descriptor name

|   |          |
|---|----------|
| 0 | AATSOZ   |
| 1 | AATSOare |
| 2 | AATSOd   |
| 3 | AATSOdv  |
| 4 | AATSOi   |

|   | molecular descriptor name | corr_value |
|---|---------------------------|------------|
| 0 | AATSOZ                    | -0.027037  |
| 1 | AATSOare                  | -0.129823  |
| 2 | AATSOd                    | 0.042740   |
| 3 | AATSOdv                   | -0.120173  |
| 4 | AATSOi                    | 0.132395   |

|   | molecular descriptor name | corr_value | absolute correlation value |
|---|---------------------------|------------|----------------------------|
| 0 | AATSOZ                    | -0.027037  | 0.027037                   |
| 1 | AATSOare                  | -0.129823  | 0.129823                   |
| 2 | AATSOd                    | 0.042740   | 0.042740                   |
| 3 | AATSOdv                   | -0.120173  | 0.120173                   |
| 4 | AATSOi                    | 0.132395   | 0.132395                   |

|      | molecular descriptor name | corr_value | absolute correlation value |
|------|---------------------------|------------|----------------------------|
| 226  | AMID_0                    | -0.524157  | 0.524157                   |
| 505  | EState_VSA5               | -0.579664  | 0.579664                   |
| 791  | MDEO-12                   | -0.558727  | 0.558727                   |
| 851  | NdssC                     | -0.506855  | 0.506855                   |
| 1091 | VSA_EState5               | 0.503578   | 0.503578                   |

|      | molecular descriptor name | corr_value | absolute correlation value |
|------|---------------------------|------------|----------------------------|
| 226  | AMID_0                    | -0.524157  | 0.524157                   |
| 505  | EState_VSA5               | -0.579664  | 0.579664                   |
| 791  | MDEO-12                   | -0.558727  | 0.558727                   |
| 851  | NdssC                     | -0.506855  | 0.506855                   |
| 1091 | VSA_EState5               | 0.503578   | 0.503578                   |

The model used is: SVR...

Return the coefficient of determination of the prediction:

0.537072682454653

R<sup>2</sup> score: 0.45036618843522247

Correlation coefficient: 0.6710932784905705

Test data - unseen during training:

R<sup>2</sup> score: 0.537072682454653

Correlation coefficient: 0.7328524288386121

[7.85699147 6.58053324 7.30668225 7.92226268 7.95876083 8.18224156  
8.33410513 7.96378315 8.2076654 7.75689871 6.93246836 7.70691664  
7.69093605 7.85065507 8.19210208 8.18838247 6.95968616 6.46641962]

|     |          |
|-----|----------|
| 102 | 8.000000 |
| 38  | 6.104025 |
| 8   | 6.044360 |
| 109 | 7.886057 |
| 11  | 8.107905 |
| 51  | 8.000000 |

```

88      8.886057
21      7.554396
82      8.301030
98      7.568636
58      7.677781
64      8.327902
74      8.070581
103     8.136677
91     10.000000
43      7.886057
25      5.221704
30      6.315155

```

Name: LoVo, dtype: float64

Training Root Mean Square Error: 0.6425273818962154

Testing Root Mean Square Error: 0.744780143630552

## 5.1 Search inside correlation space

```

[40]: step = 0.01
      initial_step = corr_low
      last_step = corr_high
      first_list = [x / 100.0 for x in range(int(initial_step*100),
      ↪int(last_step*100), int(step*100))]
      second_list = []
      third_list = []
      fourth_l = []
      fifth_l = []
      f_list = []
      for i in first_list:
          without_standardization, train_r2, test_r2, _, h_, target_column_name,
          ↪training_data_RMSE, test_data_RMSE = pred_model.
          ↪prepare_data_and_create_model(molecular_descriptors_df = data,

          ↪
          ↪correlation_threshold = i,

          ↪
          ↪standardization = False,

          ↪
          ↪model_type = 'SVR',

          ↪
          ↪kernel_ = 'linear',

          ↪
          ↪gamma_ = 'auto',

          ↪
          ↪target_column_name = target,

          ↪
          ↪random_state=random_state,

```

```

    ↪          train_test_split_ = True,

    ↪          verbose = False)
    second_list.append(train_r2)
    third_list.append(test_r2)
    fourth_l.append(training_data_RMSE)
    fifth_l.append(test_data_RMSE)
    f_list.append(len(h_))

```

```

[41]: df_without_standardization = pd.DataFrame(data=first_list,
    ↪      columns=["Correlation threshold"])
df_without_standardization['Training data R^2 score'] = second_list
df_without_standardization['Test data R^2 score'] = third_list
df_without_standardization['Training RMSE'] = fourth_l
df_without_standardization['Test RMSE'] = fifth_l
df_without_standardization['Number of features'] = f_list

```

```

[42]: df_svm = df_without_standardization.copy()
df_without_standardization

```

```

[42]:
Correlation threshold  Training data R^2 score  Test data R^2 score  \
0                    0.33                0.656023          0.572259
1                    0.34                0.661062          0.601702
2                    0.35                0.649279          0.585295
3                    0.36                0.654003          0.598627
4                    0.37                0.608604          0.569823
5                    0.38                0.613239          0.587956
6                    0.39                0.585160          0.569465
7                    0.40                0.570670          0.545900
8                    0.41                0.568912          0.545411
9                    0.42                0.542509          0.514666
10                   0.43                0.542186          0.496898
11                   0.44                0.542186          0.496898
12                   0.45                0.515360          0.546672
13                   0.46                0.499300          0.529713
14                   0.47                0.450797          0.532164
15                   0.48                0.451336          0.542205
16                   0.49                0.450366          0.537073
17                   0.50                0.450366          0.537073
18                   0.51                0.431293          0.531133
19                   0.52                0.431293          0.531133
20                   0.53                0.430157          0.531358
21                   0.54                0.430157          0.531358

Training RMSE  Test RMSE  Number of features
0          0.508299    0.715916                63

```

|    |          |          |    |
|----|----------|----------|----|
| 1  | 0.504562 | 0.690837 | 57 |
| 2  | 0.513258 | 0.704922 | 52 |
| 3  | 0.509790 | 0.693499 | 47 |
| 4  | 0.542204 | 0.717952 | 39 |
| 5  | 0.538984 | 0.702657 | 35 |
| 6  | 0.558207 | 0.718251 | 27 |
| 7  | 0.567872 | 0.737645 | 22 |
| 8  | 0.569033 | 0.738042 | 21 |
| 9  | 0.586201 | 0.762592 | 18 |
| 10 | 0.586407 | 0.776426 | 17 |
| 11 | 0.586407 | 0.776426 | 17 |
| 12 | 0.603343 | 0.737018 | 14 |
| 13 | 0.613259 | 0.750677 | 10 |
| 14 | 0.642276 | 0.748719 | 7  |
| 15 | 0.641960 | 0.740640 | 6  |
| 16 | 0.642527 | 0.744780 | 5  |
| 17 | 0.642527 | 0.744780 | 5  |
| 18 | 0.653581 | 0.749543 | 3  |
| 19 | 0.653581 | 0.749543 | 3  |
| 20 | 0.654233 | 0.749363 | 2  |
| 21 | 0.654233 | 0.749363 | 2  |

## 5.2 Plots

```
[43]: plt.plot(df_without_standardization['Correlation threshold'],
             df_without_standardization['Training data R^2 score'], label = "Training
             data R^2 score", marker='v')
plt.plot(df_without_standardization['Correlation threshold'],
             df_without_standardization['Test data R^2 score'], label = "Test data R^2
             score", marker='D')
plt.legend()
plt.xlabel('Correlation threshold')
plt.ylabel('R^2 score')
plt.ylim([0, 1])
plt.show()
```

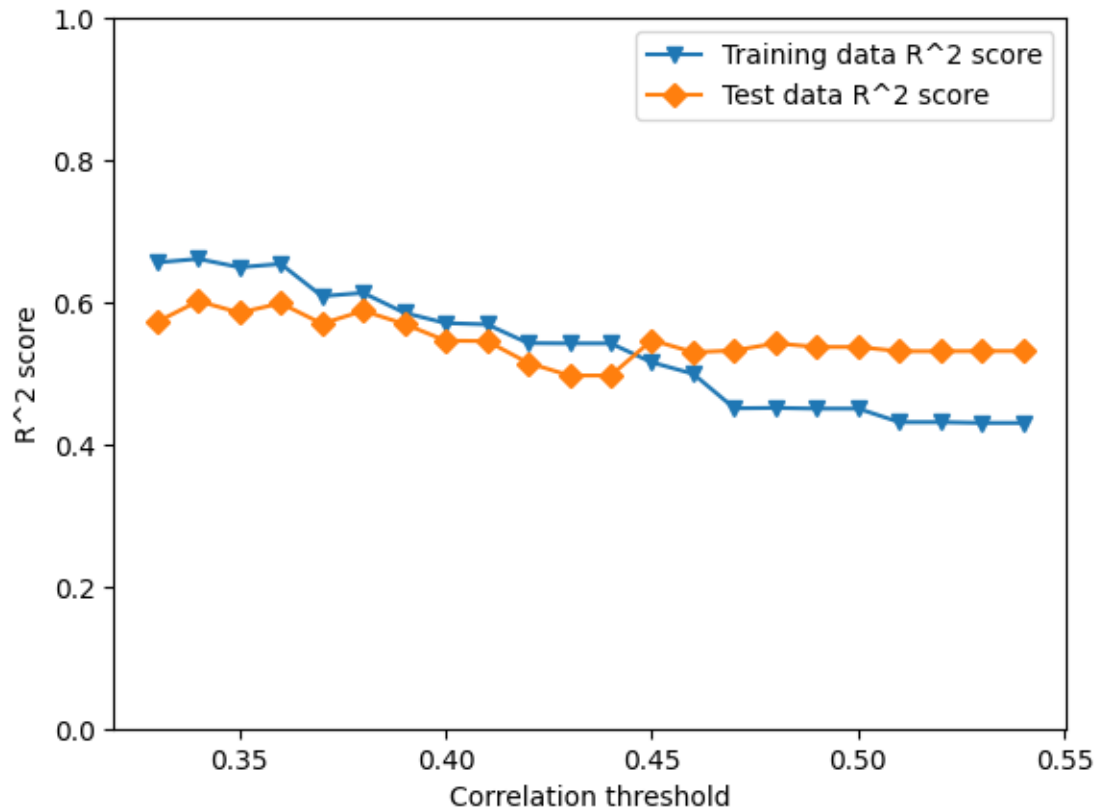

```
[44]: plt.plot(df_without_standardization['Correlation threshold'],  
             df_without_standardization['Number of features'], label = "Number of  
             features", marker='.')  
plt.legend()  
plt.xlabel('Correlation threshold')  
plt.ylabel('Number of features')  
plt.show()
```

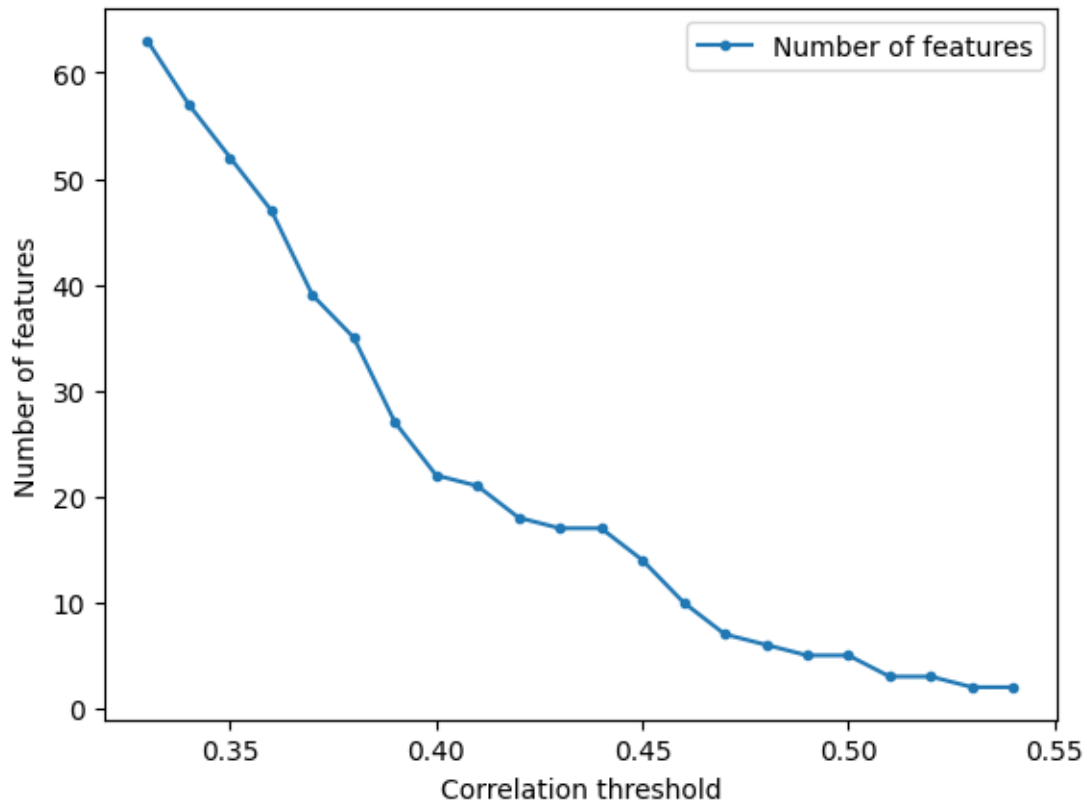

### 5.3 Store quality measurements

```
[45]: with pd.ExcelWriter('../Data/Quality_'+str(target)+'_'+str(random_state)+'_'.  
      ↪ 'xlsx') as writer:  
      df_linear.to_excel(writer, sheet_name='MLR')  
      df_decision_tree.to_excel(writer, sheet_name='DT')  
      df_random_forest.to_excel(writer, sheet_name='RF')  
      df_k_nearest.to_excel(writer, sheet_name='KNN')  
      df_svm.to_excel(writer, sheet_name='SVM')
```

# Notebook

January 18, 2024

## 1 File 25

```
[1]: import sys
from pathlib import Path
prediction_mode_path = Path("../module")
sys.path.append(prediction_mode_path.as_posix())
import models_creation as pred_model

import pandas as pd
import numpy as np

from sklearn.metrics import r2_score

import matplotlib.pyplot as plt
from sklearn.tree import plot_tree

from matplotlib import pyplot as plt

import joblib

import warnings
warnings.filterwarnings('ignore')
```

```
[2]: load_prepared_data = pd.read_excel('../Data/Kolchicyna_machine_learning.xlsx')
load_prepared_data = load_prepared_data.drop(columns=['Unnamed: 0'])

target = 'LoVo'

corr_low = 0.33
corr_high = 0.55

random_state = 28
```

```
[3]: load_prepared_data.head()
```

```
[3]:
```

|   | AATSOZ    | AATSOare | AATSOd   | AATSOdv  | AATSOi     | AATSOm    | AATSOp   | \ |
|---|-----------|----------|----------|----------|------------|-----------|----------|---|
| 0 | 25.090909 | 6.046518 | 3.109091 | 6.662626 | 160.775045 | 99.075564 | 1.555512 |   |
| 1 | 24.448276 | 6.008422 | 3.051724 | 6.386973 | 161.021674 | 96.473315 | 1.538471 |   |

|   |           |          |          |          |            |           |          |
|---|-----------|----------|----------|----------|------------|-----------|----------|
| 2 | 23.868852 | 5.974074 | 3.000000 | 6.138434 | 161.244045 | 94.127025 | 1.523105 |
| 3 | 23.868852 | 5.974074 | 3.032787 | 6.171220 | 161.244045 | 94.127025 | 1.523105 |
| 4 | 23.343750 | 5.942945 | 2.953125 | 5.913194 | 161.445569 | 92.000700 | 1.509180 |

|   | AATS0pe  | AATS0s   | AATS0se  | ... | A549_float | MCF-7_float | LoVo_float | \ |
|---|----------|----------|----------|-----|------------|-------------|------------|---|
| 0 | 6.126680 | 3.435416 | 7.629859 | ... | 10.8       | 10.3        | 6.5        |   |
| 1 | 6.088791 | 3.330998 | 7.596891 | ... | 11.6       | 12.0        | 8.5        |   |
| 2 | 6.054630 | 3.236850 | 7.567166 | ... | 10.9       | 12.2        | 8.8        |   |
| 3 | 6.054630 | 3.257798 | 7.567166 | ... | 10.5       | 11.3        | 8.5        |   |
| 4 | 6.023670 | 3.151529 | 7.540228 | ... | 89.5       | 92.7        | 52.8       |   |

|   | LoVo/DX_float | BALB/3T3_float | A549_float_transformed | \ |
|---|---------------|----------------|------------------------|---|
| 0 | 54.9          | 10.2           | 7.966576               |   |
| 1 | 31.1          | 14.3           | 7.935542               |   |
| 2 | 17.9          | 11.7           | 7.962574               |   |
| 3 | 10.2          | 11.0           | 7.978811               |   |
| 4 | 77.8          | 99.4           | 7.048177               |   |

|   | MCF-7_float_transformed | LoVo_float_transformed | LoVo/DX_float_transformed | \ |
|---|-------------------------|------------------------|---------------------------|---|
| 0 | 7.987163                | 8.187087               | 7.260428                  |   |
| 1 | 7.920819                | 8.070581               | 7.507240                  |   |
| 2 | 7.913640                | 8.055517               | 7.747147                  |   |
| 3 | 7.946922                | 8.070581               | 7.991400                  |   |
| 4 | 7.032920                | 7.277366               | 7.109020                  |   |

|   | BALB/3T3_float_transformed |
|---|----------------------------|
| 0 | 7.991400                   |
| 1 | 7.844664                   |
| 2 | 7.931814                   |
| 3 | 7.958607                   |
| 4 | 7.002614                   |

[5 rows x 1221 columns]

```
[4]: data = load_prepared_data[list(load_prepared_data.columns)[0:-10]]
data[target] = load_prepared_data[load_prepared_data.columns[-3]]
data.head()
```

|   | AATS0Z    | AATS0are | AATS0d   | AATS0dv  | AATS0i     | AATS0m    | AATS0p   | \ |
|---|-----------|----------|----------|----------|------------|-----------|----------|---|
| 0 | 25.090909 | 6.046518 | 3.109091 | 6.662626 | 160.775045 | 99.075564 | 1.555512 |   |
| 1 | 24.448276 | 6.008422 | 3.051724 | 6.386973 | 161.021674 | 96.473315 | 1.538471 |   |
| 2 | 23.868852 | 5.974074 | 3.000000 | 6.138434 | 161.244045 | 94.127025 | 1.523105 |   |
| 3 | 23.868852 | 5.974074 | 3.032787 | 6.171220 | 161.244045 | 94.127025 | 1.523105 |   |
| 4 | 23.343750 | 5.942945 | 2.953125 | 5.913194 | 161.445569 | 92.000700 | 1.509180 |   |

  

|   | AATS0pe  | AATS0s   | AATS0se  | ... | piPC10   | piPC2    | piPC3    | piPC4    | \ |
|---|----------|----------|----------|-----|----------|----------|----------|----------|---|
| 0 | 6.126680 | 3.435416 | 7.629859 | ... | 7.999655 | 4.266195 | 4.915408 | 5.516700 |   |



|   |          |          |          |     |          |          |          |          |
|---|----------|----------|----------|-----|----------|----------|----------|----------|
| 1 | 6.088791 | 3.330998 | 7.596891 | ... | 8.018726 | 4.280132 | 4.922714 | 5.520711 |
| 2 | 6.054630 | 3.236850 | 7.567166 | ... | 8.028799 | 4.293878 | 4.929967 | 5.524706 |
| 3 | 6.054630 | 3.257798 | 7.567166 | ... | 8.037440 | 4.307438 | 4.929967 | 5.524706 |
| 4 | 6.023670 | 3.151529 | 7.540228 | ... | 8.034892 | 4.307438 | 4.937168 | 5.528685 |

|   | piPC5    | piPC6    | piPC7    | piPC8    | piPC9    | LoVo     |
|---|----------|----------|----------|----------|----------|----------|
| 0 | 6.098566 | 6.595759 | 6.979116 | 7.337313 | 7.681445 | 8.187087 |
| 1 | 6.103048 | 6.601209 | 6.985613 | 7.349442 | 7.695531 | 8.070581 |
| 2 | 6.105281 | 6.603923 | 6.989306 | 7.353932 | 7.704023 | 8.055517 |
| 3 | 6.107510 | 6.606629 | 6.992068 | 7.361425 | 7.709420 | 8.070581 |
| 4 | 6.107510 | 6.605277 | 6.991148 | 7.356489 | 7.707175 | 7.277366 |

[5 rows x 1212 columns]

## 2 Multiple Linear regression (MLR)

```
[5]: without_standardization, train_r2_, test_r2_, hist1, hist2, target_column_name,
      ↪ training_data_RMSE, test_data_RMSE = pred_model.
      ↪ prepare_data_and_create_model(molecular_descriptors_df=data,
      ↪
      ↪ correlation_threshold=0.5,
      ↪
      ↪ standardization=False,
      ↪
      ↪ model_type='linear_model',
      ↪
      ↪ target_column_name = str(target),
      ↪
      ↪ random_state=random_state,
      ↪
      ↪ train_test_split_=True,
      ↪
      ↪ verbose=True)
```

I am not doing standardization...

|   | molecular descriptor name |            |
|---|---------------------------|------------|
| 0 | AATS0Z                    |            |
| 1 | AATS0are                  |            |
| 2 | AATS0d                    |            |
| 3 | AATS0dv                   |            |
| 4 | AATS0i                    |            |
|   | molecular descriptor name | corr_value |
| 0 | AATS0Z                    | -0.027037  |
| 1 | AATS0are                  | -0.129823  |
| 2 | AATS0d                    | 0.042740   |
| 3 | AATS0dv                   | -0.120173  |

|      |                           |            |                            |
|------|---------------------------|------------|----------------------------|
| 4    | AATSOi                    | 0.132395   |                            |
|      | molecular descriptor name | corr_value | absolute correlation value |
| 0    | AATSOZ                    | -0.027037  | 0.027037                   |
| 1    | AATSOare                  | -0.129823  | 0.129823                   |
| 2    | AATSOd                    | 0.042740   | 0.042740                   |
| 3    | AATSOdv                   | -0.120173  | 0.120173                   |
| 4    | AATSOi                    | 0.132395   | 0.132395                   |
|      | molecular descriptor name | corr_value | absolute correlation value |
| 226  | AMID_0                    | -0.524157  | 0.524157                   |
| 505  | EState_VSA5               | -0.579664  | 0.579664                   |
| 791  | MDEO-12                   | -0.558727  | 0.558727                   |
| 851  | NdssC                     | -0.506855  | 0.506855                   |
| 1091 | VSA_EState5               | 0.503578   | 0.503578                   |
|      | molecular descriptor name | corr_value | absolute correlation value |
| 226  | AMID_0                    | -0.524157  | 0.524157                   |
| 505  | EState_VSA5               | -0.579664  | 0.579664                   |
| 791  | MDEO-12                   | -0.558727  | 0.558727                   |
| 851  | NdssC                     | -0.506855  | 0.506855                   |
| 1091 | VSA_EState5               | 0.503578   | 0.503578                   |

The model used is: LinearReg..

Return the coefficient of determination of the prediction:

0.337000351477726

R<sup>2</sup> score: 0.5162015514838987

Correlation coefficient: 0.7184716775794984

Test data - unseen during training:

R<sup>2</sup> score: 0.337000351477726

Correlation coefficient: 0.580517313676109

[8.04195487 6.44740649 7.70878358 6.62243668 7.96878809 7.73545677  
7.83197255 8.13941052 6.93948294 7.70520781 7.9984246 7.99982883  
8.16688408 7.4465517 7.74339443 6.94259984 8.14978125 6.74021135]

113 7.795880  
35 6.254925  
101 7.275724  
36 7.017729  
100 7.337242  
13 8.055517  
0 8.187087  
114 7.638272  
104 8.318759  
96 7.769551  
40 8.050610  
103 8.136677  
48 7.853872  
39 8.267606  
14 7.273273  
117 6.167491  
21 7.554396  
9 6.343902

Name: LoVo, dtype: float64

Training Root Mean Square Error: 0.6528390819257617

Testing Root Mean Square Error: 0.5453533851862918

```
[6]: print(target_column_name+str('_transformed'))  
      print(hist1[target_column_name].hist())
```

LoVo\_transformed

AxesSubplot(0.125,0.11;0.775x0.77)



```
[7]: with_standardization, train_r2_, test_r2_, hist1, hist2, target_column_name,   
      ↪ training_data_RMSE, test_data_RMSE = pred_model.  
      ↪ prepare_data_and_create_model(molecular_descriptors_df=data,  
  
      ↪ correlation_threshold=0.50,  
  
      ↪ standardization=True,  
  
      ↪ model_type='linear_model',  
  
      ↪ target_column_name = target,
```

```

↪          random_state=random_state,
↪          train_test_split_=True,
↪          verbose=True)

```

I am doing standardization...

|   | molecular descriptor name |  |
|---|---------------------------|--|
| 0 | AATSOZ                    |  |
| 1 | AATSOare                  |  |
| 2 | AATSOd                    |  |
| 3 | AATSOdv                   |  |
| 4 | AATSOi                    |  |

  

|   | molecular descriptor name | corr_value |
|---|---------------------------|------------|
| 0 | AATSOZ                    | -0.027037  |
| 1 | AATSOare                  | -0.129823  |
| 2 | AATSOd                    | 0.042740   |
| 3 | AATSOdv                   | -0.120173  |
| 4 | AATSOi                    | 0.132395   |

  

|   | molecular descriptor name | corr_value | absolute correlation value |
|---|---------------------------|------------|----------------------------|
| 0 | AATSOZ                    | -0.027037  | 0.027037                   |
| 1 | AATSOare                  | -0.129823  | 0.129823                   |
| 2 | AATSOd                    | 0.042740   | 0.042740                   |
| 3 | AATSOdv                   | -0.120173  | 0.120173                   |
| 4 | AATSOi                    | 0.132395   | 0.132395                   |

  

|      | molecular descriptor name | corr_value | absolute correlation value |
|------|---------------------------|------------|----------------------------|
| 226  | AMID_0                    | -0.524157  | 0.524157                   |
| 505  | EState_VSA5               | -0.579664  | 0.579664                   |
| 791  | MDEO-12                   | -0.558727  | 0.558727                   |
| 851  | NdssC                     | -0.506855  | 0.506855                   |
| 1091 | VSA_EState5               | 0.503578   | 0.503578                   |

  

|      | molecular descriptor name | corr_value | absolute correlation value |
|------|---------------------------|------------|----------------------------|
| 226  | AMID_0                    | -0.524157  | 0.524157                   |
| 505  | EState_VSA5               | -0.579664  | 0.579664                   |
| 791  | MDEO-12                   | -0.558727  | 0.558727                   |
| 851  | NdssC                     | -0.506855  | 0.506855                   |
| 1091 | VSA_EState5               | 0.503578   | 0.503578                   |

The model used is: LinearReg..

Return the coefficient of determination of the prediction:

0.337000351477726

R<sup>2</sup> score: 0.5162015514838987

Correlation coefficient: 0.7184716775794984

Test data - unseen during training:

R<sup>2</sup> score: 0.337000351477726

Correlation coefficient: 0.580517313676109

[8.04195487 6.44740649 7.70878358 6.62243668 7.96878809 7.73545677

```

7.83197255 8.13941052 6.93948294 7.70520781 7.9984246 7.99982883
8.16688408 7.4465517 7.74339443 6.94259984 8.14978125 6.74021135]
113 7.795880
35 6.254925
101 7.275724
36 7.017729
100 7.337242
13 8.055517
0 8.187087
114 7.638272
104 8.318759
96 7.769551
40 8.050610
103 8.136677
48 7.853872
39 8.267606
14 7.273273
117 6.167491
21 7.554396
9 6.343902
Name: LoVo, dtype: float64
Training Root Mean Square Error: 0.6528390819257617
Testing Root Mean Square Error: 0.5453533851862918

```

## 2.1 Search inside correlation space

```

[8]: step = 0.01
initial_step = corr_low
last_step = corr_high
first_list = [x / 100.0 for x in range(int(initial_step*100),
↳int(last_step*100), int(step*100))]
second_list = []
third_list = []
fourth_l = []
fifth_l = []
f_list = []
for i in first_list:
    without_standardization, train_r2, test_r2, _, h_, target_column_name,
↳training_data_RMSE, test_data_RMSE = pred_model.
↳prepare_data_and_create_model(molecular_descriptors_df = data,

↳
correlation_threshold = i,

↳
standardization = False,

↳
model_type = 'linear_model',

```

```

    ↪          target_column_name = target,
    ↪          random_state=random_state,
    ↪          train_test_split_ = True,
    ↪          verbose = False)
second_list.append(train_r2)
third_list.append(test_r2)
fourth_l.append(training_data_RMSE)
fifth_l.append(test_data_RMSE)
f_list.append(len(h_))

```

```

[9]: df_without_standardization = pd.DataFrame(data=first_list,
    ↪columns=["Correlation threshold"])
df_without_standardization['Training data R^2 score'] = second_list
df_without_standardization['Test data R^2 score'] = third_list
df_without_standardization['Training RMSE'] = fourth_l
df_without_standardization['Test RMSE'] = fifth_l
df_without_standardization['Number of features'] = f_list

```

```

[10]: df_linear = df_without_standardization.copy()
df_without_standardization

```

```

[10]:
Correlation threshold  Training data R^2 score  Test data R^2 score  \
0                    0.33                0.926564          -2.796318
1                    0.34                0.891545          -1.867318
2                    0.35                0.869952          -0.626826
3                    0.36                0.844732          -1.084081
4                    0.37                0.760465          -0.085131
5                    0.38                0.741120          -0.360039
6                    0.39                0.704287          -0.065653
7                    0.40                0.677245           0.250783
8                    0.41                0.677188           0.258607
9                    0.42                0.626303           0.289063
10                   0.43                0.626292           0.290803
11                   0.44                0.626292           0.290803
12                   0.45                0.598673           0.465834
13                   0.46                0.583054           0.247032
14                   0.47                0.525993           0.334133
15                   0.48                0.517159           0.331566
16                   0.49                0.516202           0.337000
17                   0.50                0.516202           0.337000
18                   0.51                0.489571           0.369378
19                   0.52                0.489571           0.369378
20                   0.53                0.464962           0.394784

```

21                                      0.54                                      0.464962                                      0.394784

|    | Training RMSE | Test RMSE | Number of features |
|----|---------------|-----------|--------------------|
| 0  | 0.254349      | 1.304976  | 63                 |
| 1  | 0.309100      | 1.134121  | 57                 |
| 2  | 0.338474      | 0.854264  | 52                 |
| 3  | 0.369840      | 0.966893  | 47                 |
| 4  | 0.459365      | 0.697690  | 39                 |
| 5  | 0.477554      | 0.781083  | 35                 |
| 6  | 0.510398      | 0.691400  | 27                 |
| 7  | 0.533225      | 0.579729  | 22                 |
| 8  | 0.533272      | 0.576694  | 21                 |
| 9  | 0.573765      | 0.564725  | 18                 |
| 10 | 0.573773      | 0.564033  | 17                 |
| 11 | 0.573773      | 0.564033  | 17                 |
| 12 | 0.594598      | 0.489507  | 14                 |
| 13 | 0.606058      | 0.581178  | 10                 |
| 14 | 0.646199      | 0.546531  | 7                  |
| 15 | 0.652192      | 0.547584  | 6                  |
| 16 | 0.652839      | 0.545353  | 5                  |
| 17 | 0.652839      | 0.545353  | 5                  |
| 18 | 0.670566      | 0.531871  | 3                  |
| 19 | 0.670566      | 0.531871  | 3                  |
| 20 | 0.686541      | 0.521047  | 2                  |
| 21 | 0.686541      | 0.521047  | 2                  |

[ ]:

## 2.2 Plots

```
[11]: plt.plot(df_without_standardization['Correlation threshold'],
             df_without_standardization['Training data R^2 score'], label = "Training
             data R^2 score", marker='v')
plt.plot(df_without_standardization['Correlation threshold'],
             df_without_standardization['Test data R^2 score'], label = "Test data R^2
             score", marker='D')
plt.legend()
plt.xlabel('Correlation threshold')
plt.ylabel('R^2 score')
plt.ylim([0, 1])
plt.show()
```

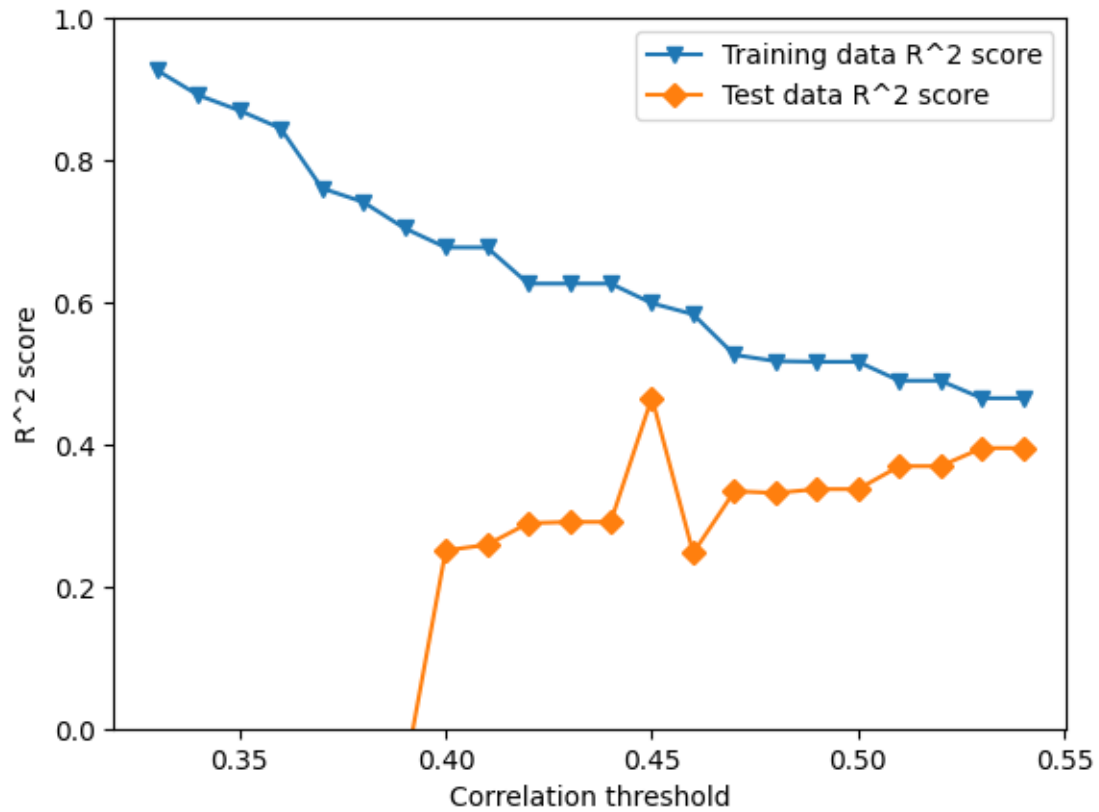

```
[12]: plt.plot(df_without_standardization['Correlation threshold'],
             df_without_standardization['Number of features'], label = "Number of
             features", marker='.')
plt.legend()
plt.xlabel('Correlation threshold')
plt.ylabel('Number of features')
plt.show()
```





[ ]:

## 2.3 Decision Tree

```
[13]: without_standardization, train_r2_, test_r2_, hist1, hist2, target_column_name,
      ↪ training_data_RMSE, test_data_RMSE = pred_model.
      ↪ prepare_data_and_create_model(molecular_descriptors_df=data,
      ↪
      ↪         correlation_threshold=0.50,
      ↪
      ↪         standardization=False,
      ↪
      ↪         model_type='DecisionTreeRegressor',
      ↪
      ↪         max_depth=5,
      ↪
      ↪         target_column_name = target,
      ↪
      ↪         random_state=random_state,
```

```

↪          train_test_split_=True,
↪          verbose=True)

```

I am not doing standardization...

```

molecular descriptor name
0          AATSOZ
1          AATSOare
2          AATSOd
3          AATSOdv
4          AATSOi
molecular descriptor name  corr_value
0          AATSOZ      -0.027037
1          AATSOare    -0.129823
2          AATSOd      0.042740
3          AATSOdv     -0.120173
4          AATSOi      0.132395
molecular descriptor name  corr_value  absolute correlation value
0          AATSOZ      -0.027037          0.027037
1          AATSOare    -0.129823          0.129823
2          AATSOd      0.042740          0.042740
3          AATSOdv     -0.120173          0.120173
4          AATSOi      0.132395          0.132395
molecular descriptor name  corr_value  absolute correlation value
226          AMID_0      -0.524157          0.524157
505          EState_VSA5 -0.579664          0.579664
791          MDEO-12     -0.558727          0.558727
851          NdssC       -0.506855          0.506855
1091         VSA_EState5  0.503578          0.503578
molecular descriptor name  corr_value  absolute correlation value
226          AMID_0      -0.524157          0.524157
505          EState_VSA5 -0.579664          0.579664
791          MDEO-12     -0.558727          0.558727
851          NdssC       -0.506855          0.506855
1091         VSA_EState5  0.503578          0.503578
The model used is: DecisionTree...
Return the coefficient of determination of the prediction:
0.49523366571868277
R^2 score: 0.7741874734750118
Correlation coefficient: 0.8798792380065641
Test data - unseen during training:
R^2 score: 0.49523366571868277
Correlation coefficient: 0.7037284033763898
[8.05782805 7.01392173 8.05782805 7.01392173 8.05782805 8.05782805
 8.05782805 7.58505897 7.59136896 8.05782805 8.05782805 8.05782805
 8.05782805 8.05782805 8.05782805 5.31054481 7.18444053 6.04436035]
113      7.795880

```

```
35      6.254925
101     7.275724
36      7.017729
100     7.337242
13      8.055517
0       8.187087
114     7.638272
104     8.318759
96      7.769551
40      8.050610
103     8.136677
48      7.853872
39      8.267606
14      7.273273
117     6.167491
21      7.554396
9       6.343902
```

```
Name: LoVo, dtype: float64
```

```
Training Root Mean Square Error: 0.4460134183437457
```

```
Testing Root Mean Square Error: 0.47584614471491754
```

```
[14]: print(target_column_name+str('_transformed'))
      print(hist1[target_column_name].hist())
```

```
LoVo_transformed
```

```
AxesSubplot(0.125,0.11;0.775x0.77)
```



```
[15]: with_standardization, train_r2_, test_r2_, hist1, hist2, target_column_name,
      ↪ training_data_RMSE, test_data_RMSE = pred_model.
      ↪ prepare_data_and_create_model(molecular_descriptors_df=data,
      ↪
      ↪         correlation_threshold=0.50,
      ↪
      ↪         standardization=True,
      ↪
      ↪         model_type='DecisionTreeRegressor',
      ↪
      ↪         max_depth=5,
      ↪
      ↪         target_column_name = target,
      ↪
      ↪         random_state=random_state,
      ↪
      ↪         train_test_split_=True,
      ↪
      ↪         verbose=True)
```

I am doing standardization...  
molecular descriptor name

|      |                           |            |                            |
|------|---------------------------|------------|----------------------------|
| 0    | AATSOZ                    |            |                            |
| 1    | AATSOare                  |            |                            |
| 2    | AATSOd                    |            |                            |
| 3    | AATSOdv                   |            |                            |
| 4    | AATSOi                    |            |                            |
|      | molecular descriptor name | corr_value |                            |
| 0    | AATSOZ                    | -0.027037  |                            |
| 1    | AATSOare                  | -0.129823  |                            |
| 2    | AATSOd                    | 0.042740   |                            |
| 3    | AATSOdv                   | -0.120173  |                            |
| 4    | AATSOi                    | 0.132395   |                            |
|      | molecular descriptor name | corr_value | absolute correlation value |
| 0    | AATSOZ                    | -0.027037  | 0.027037                   |
| 1    | AATSOare                  | -0.129823  | 0.129823                   |
| 2    | AATSOd                    | 0.042740   | 0.042740                   |
| 3    | AATSOdv                   | -0.120173  | 0.120173                   |
| 4    | AATSOi                    | 0.132395   | 0.132395                   |
|      | molecular descriptor name | corr_value | absolute correlation value |
| 226  | AMID_0                    | -0.524157  | 0.524157                   |
| 505  | EState_VSA5               | -0.579664  | 0.579664                   |
| 791  | MDEO-12                   | -0.558727  | 0.558727                   |
| 851  | NdssC                     | -0.506855  | 0.506855                   |
| 1091 | VSA_EState5               | 0.503578   | 0.503578                   |
|      | molecular descriptor name | corr_value | absolute correlation value |
| 226  | AMID_0                    | -0.524157  | 0.524157                   |
| 505  | EState_VSA5               | -0.579664  | 0.579664                   |
| 791  | MDEO-12                   | -0.558727  | 0.558727                   |
| 851  | NdssC                     | -0.506855  | 0.506855                   |
| 1091 | VSA_EState5               | 0.503578   | 0.503578                   |

The model used is: DecisionTree...

Return the coefficient of determination of the prediction:  
0.49523366571868277

R<sup>2</sup> score: 0.7741874734750118

Correlation coefficient: 0.8798792380065641

Test data - unseen during training:  
R<sup>2</sup> score: 0.49523366571868277

Correlation coefficient: 0.7037284033763898

[8.05782805 7.01392173 8.05782805 7.01392173 8.05782805 8.05782805  
8.05782805 7.58505897 7.59136896 8.05782805 8.05782805 8.05782805  
8.05782805 8.05782805 8.05782805 5.31054481 7.18444053 6.04436035]

113 7.795880

35 6.254925

101 7.275724

36 7.017729

100 7.337242

13 8.055517

0 8.187087

114 7.638272

```

104      8.318759
96      7.769551
40      8.050610
103     8.136677
48      7.853872
39      8.267606
14      7.273273
117     6.167491
21      7.554396
9       6.343902

```

Name: LoVo, dtype: float64

Training Root Mean Square Error: 0.4460134183437457

Testing Root Mean Square Error: 0.47584614471491754

## 2.4 Search inside correlation space

```

[16]: step = 0.01
initial_step = corr_low
last_step = corr_high
first_list = [x / 100.0 for x in range(int(initial_step*100),
↳int(last_step*100), int(step*100))]
max_depth = [range(2, 30, 1)]
corr_th = []
second_list = []
third_list = []
fourth_l = []
fifth_l = []
f_list = []
fif_list = []
for i in first_list:
    for depth in max_depth[0]:

        without_standardization, train_r2, test_r2, _, h_, target_column_name,
↳training_data_RMSE, test_data_RMSE = pred_model.
↳prepare_data_and_create_model(molecular_descriptors_df=data,

↳                                correlation_threshold=i,
↳                                standardization=False,
↳                                model_type='DecisionTreeRegressor',
↳                                max_depth=depth,
↳                                target_column_name = target,
↳                                random_state=random_state,

```

```

↪          train_test_split_=True,
↪          verbose=False)
    corr_th.append(i)
    second_list.append(train_r2)
    third_list.append(test_r2)
    fourth_l.append(training_data_RMSE)
    fifth_l.append(test_data_RMSE)
    f_list.append(len(h_))
    fif_list.append(depth)

```

```

[17]: df_without_standardization = pd.DataFrame(data=corr_th, columns=["Correlation_
↪threshold"])
df_without_standardization['Training data R^2 score'] = second_list
df_without_standardization['Test data R^2 score'] = third_list
df_without_standardization['Training RMSE'] = fourth_l
df_without_standardization['Test RMSE'] = fifth_l
df_without_standardization['Number of features'] = f_list
df_without_standardization['Depth number'] = fif_list

```

```

[18]: df_decision_tree = df_without_standardization.copy()
#df_without_standardization.to_excel('../Data/
↪A549_Decision_tree_rs_'+str(random_state)+'.xlsx')

```

## 2.5 Plots

```
[19]: corre_list = [x / 100.0 for x in range(int(initial_step*100),
    ↪int(last_step*100), int(0.01*100))]
for element in corre_list:
    element_ =
    ↪df_without_standardization[df_without_standardization['Correlation_
    ↪threshold'] == float(element)]
    plt.plot(element_['Depth number'], element_['Training data R^2 score'],
    ↪label = "Training data R^2 score", marker='v')
    plt.plot(element_['Depth number'], element_['Test data R^2 score'], label =
    ↪"Test data R^2 score", marker='D')
    plt.legend()
    plt.xlabel('Depth number -> correlation threshold: '+str(element)+'.\n
    ↪Number of features: '+str(element_['Number of features'].iloc[0]),
    ↪fontweight='bold')
    plt.xlim(max(element_['Depth number'])+1, min(element_['Depth number'])-1)
    plt.ylabel('R^2 score')
    plt.ylim([0, 1])
    plt.rc('grid', linestyle="-.", color='black')
    plt.grid(True)
    plt.show()
```

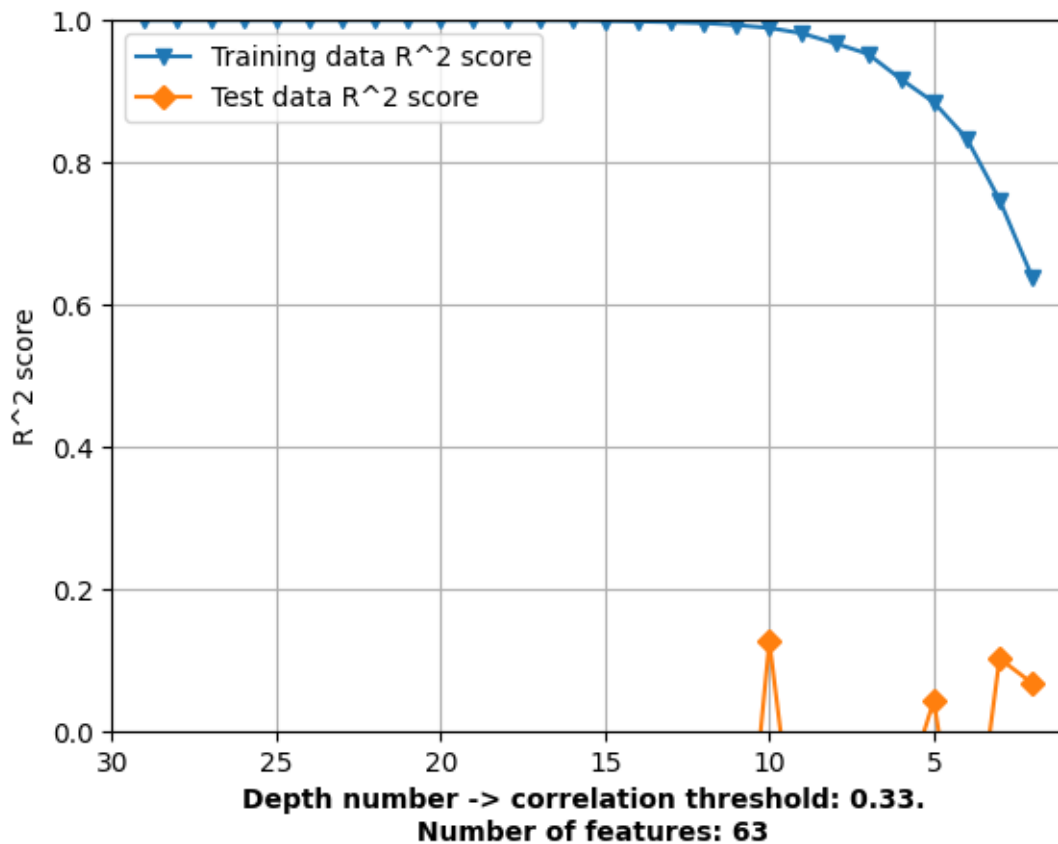



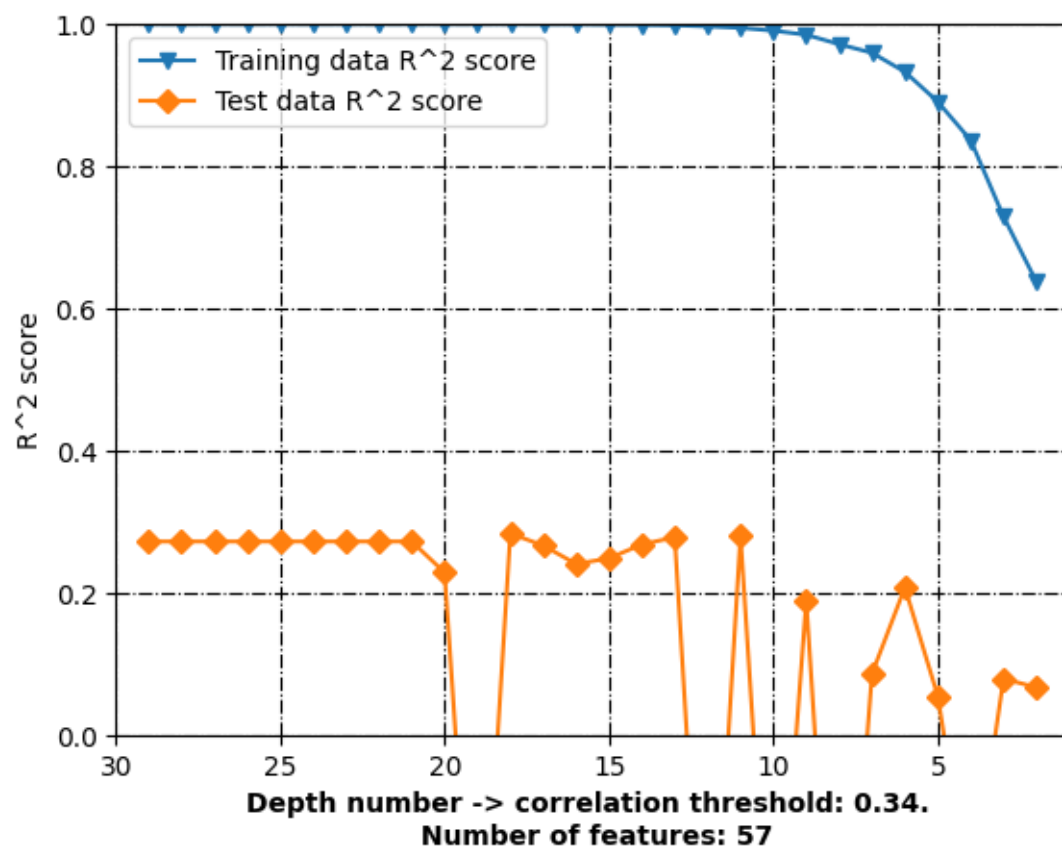

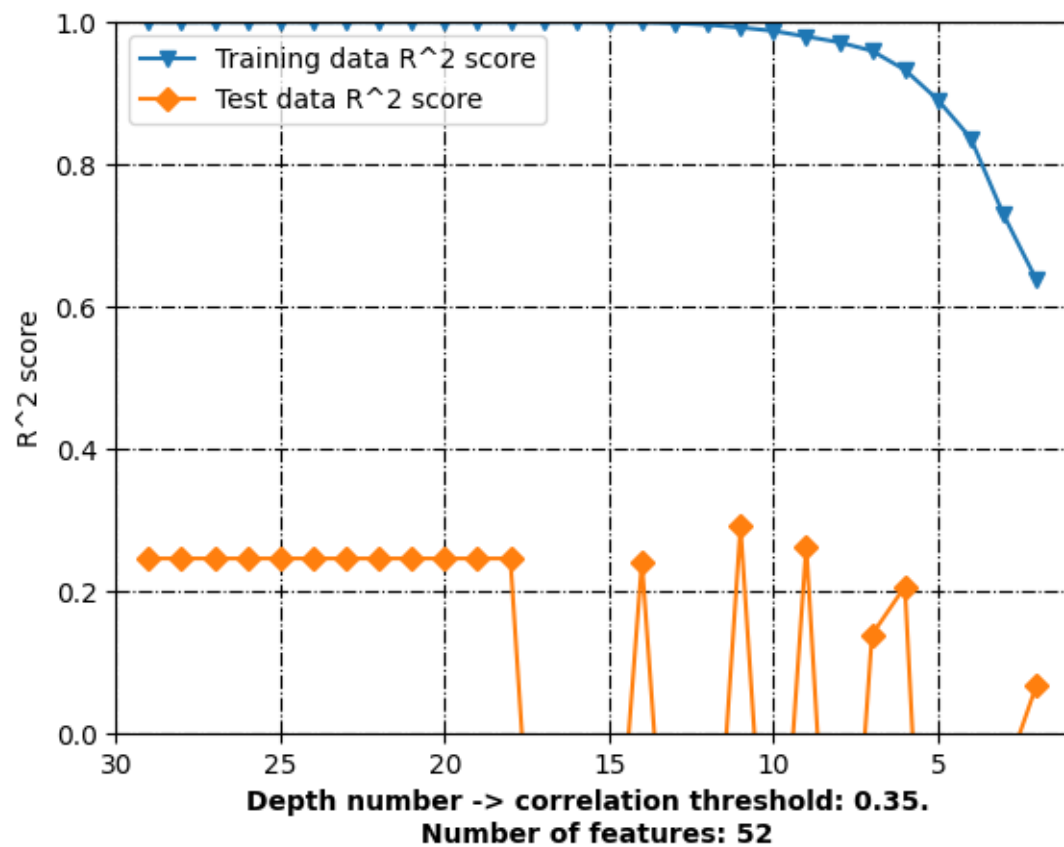

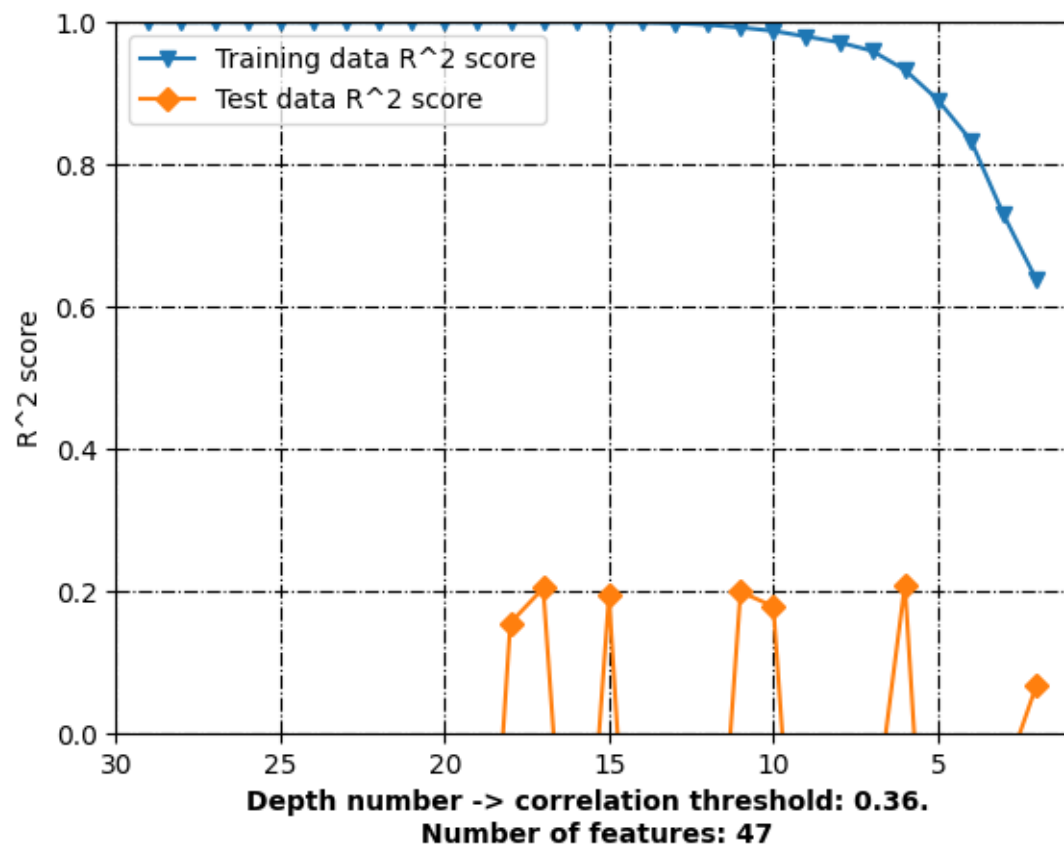

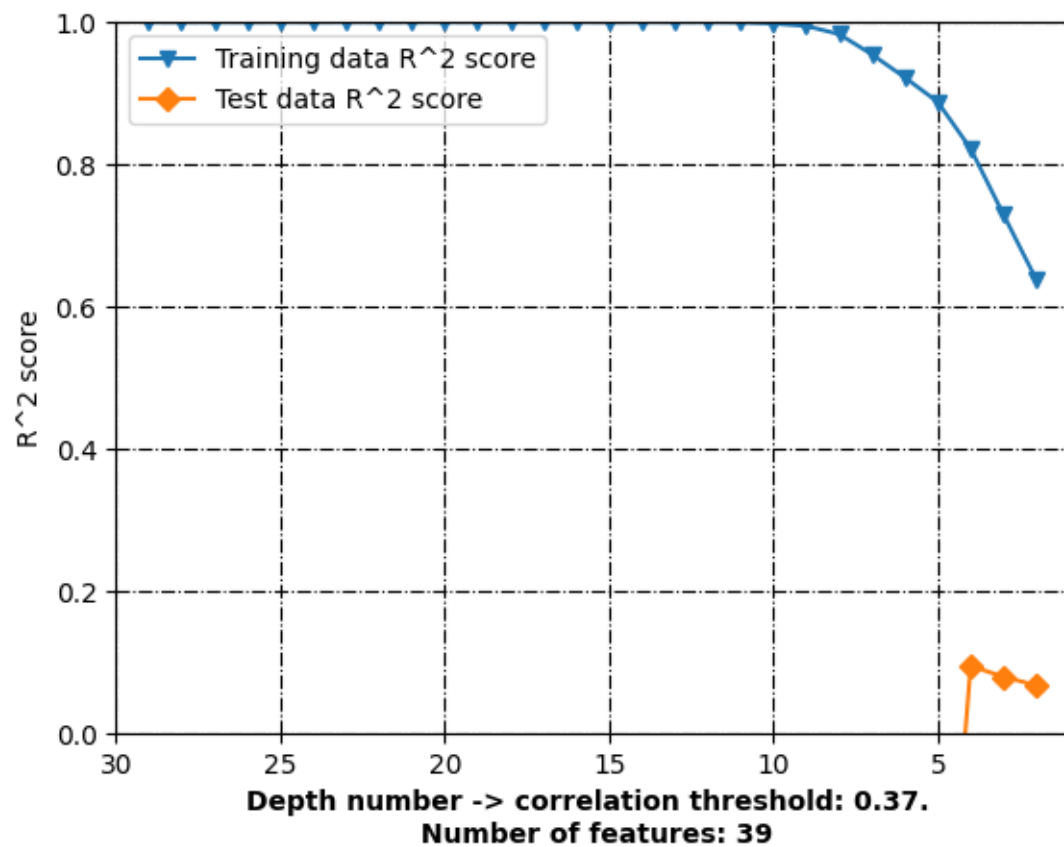

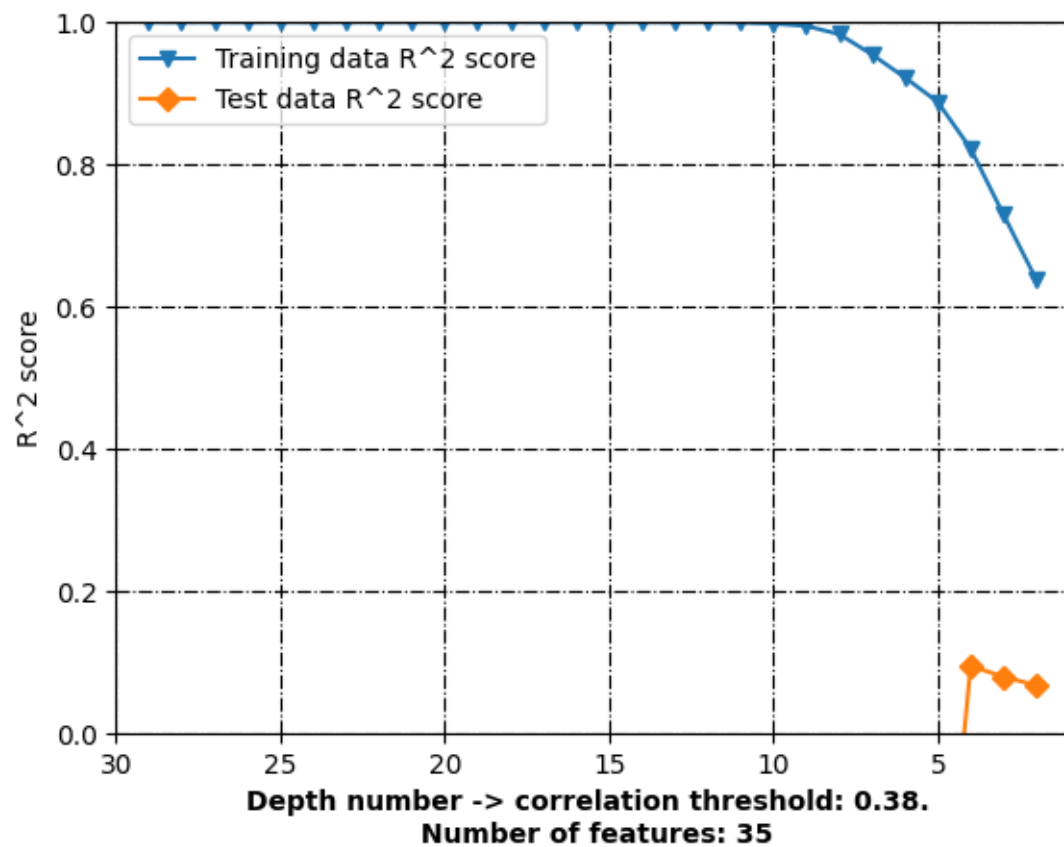

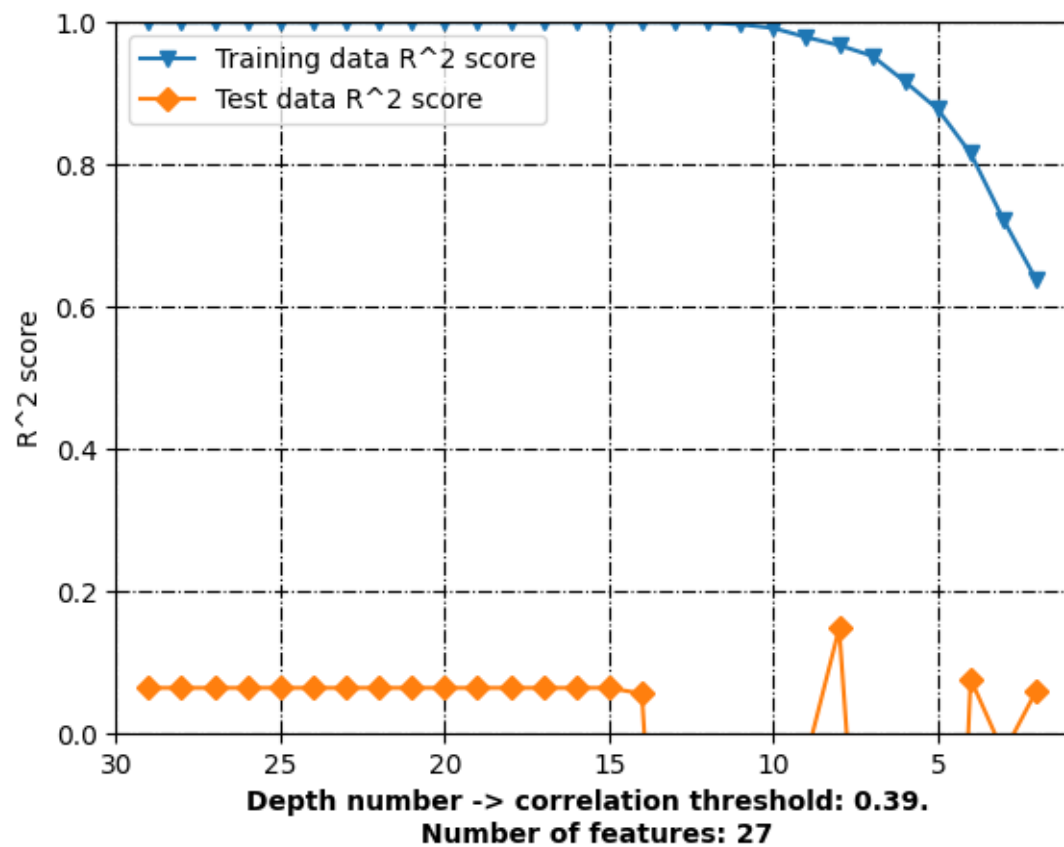

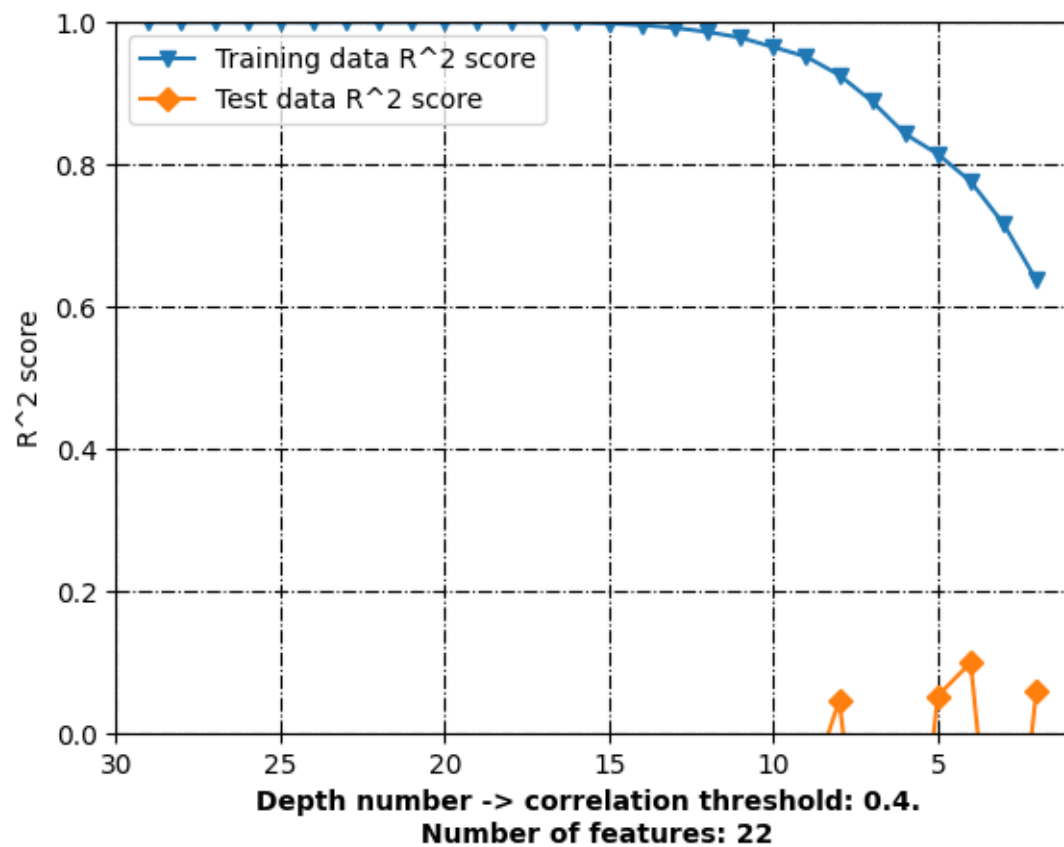

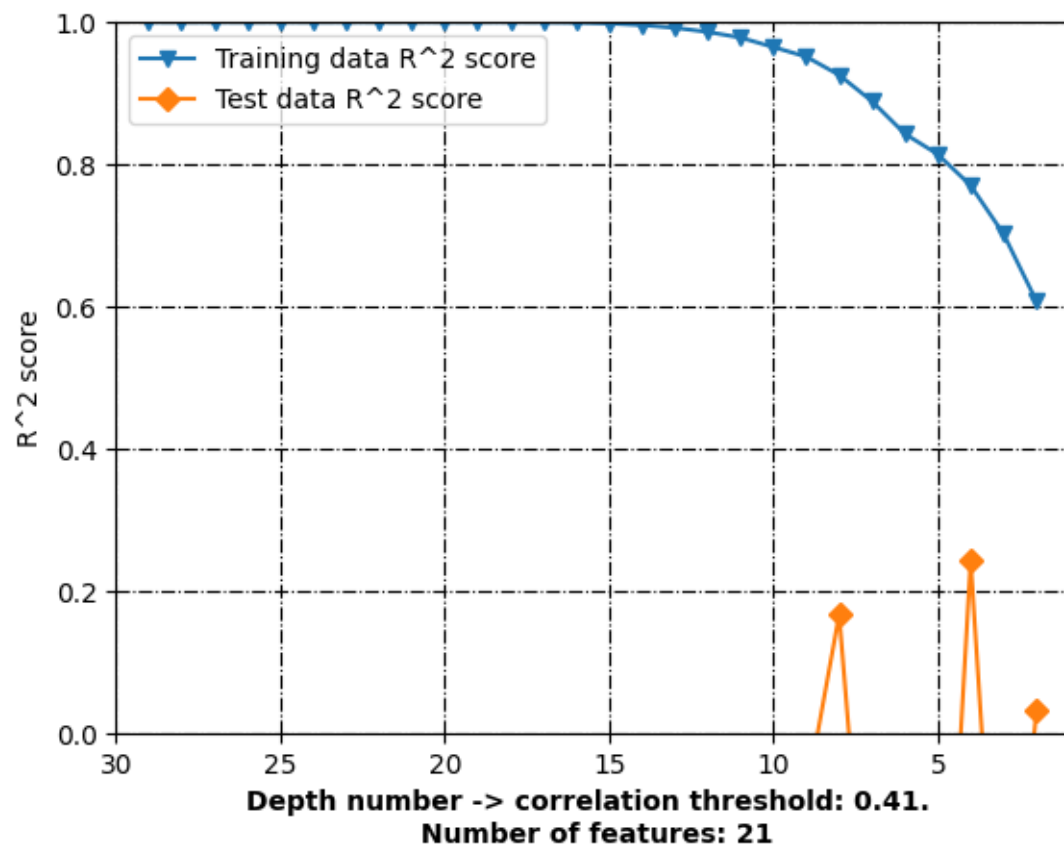



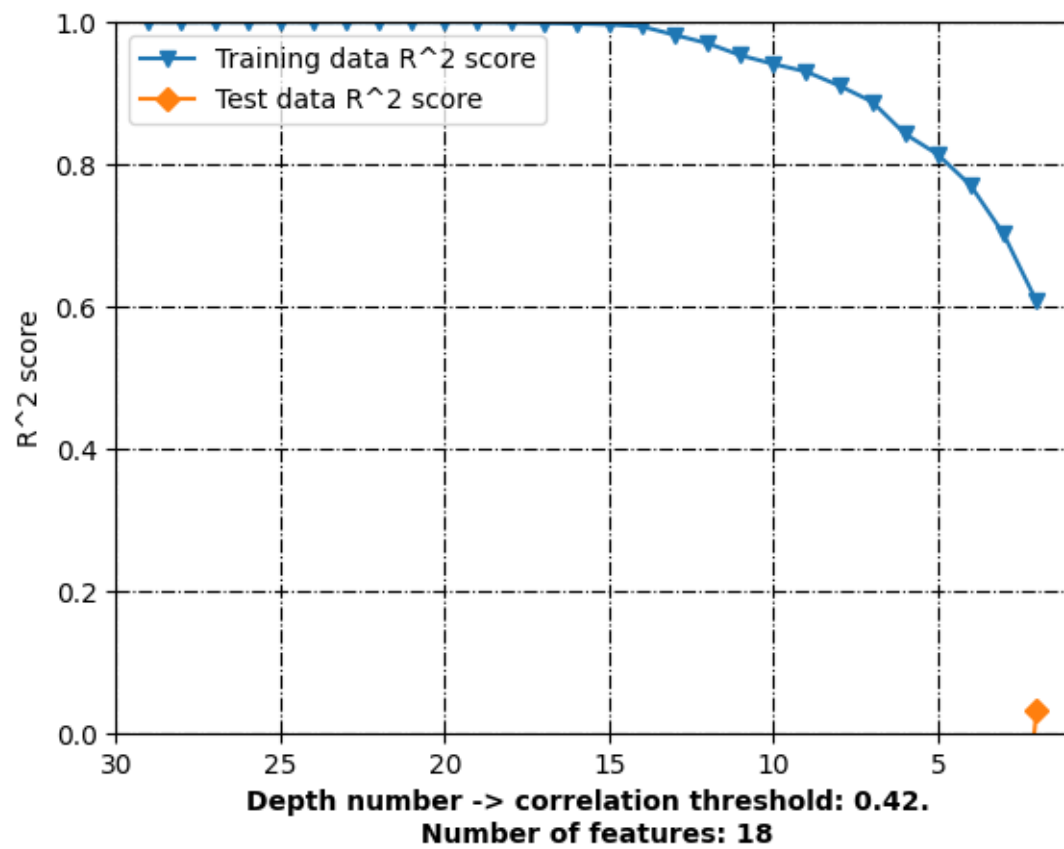

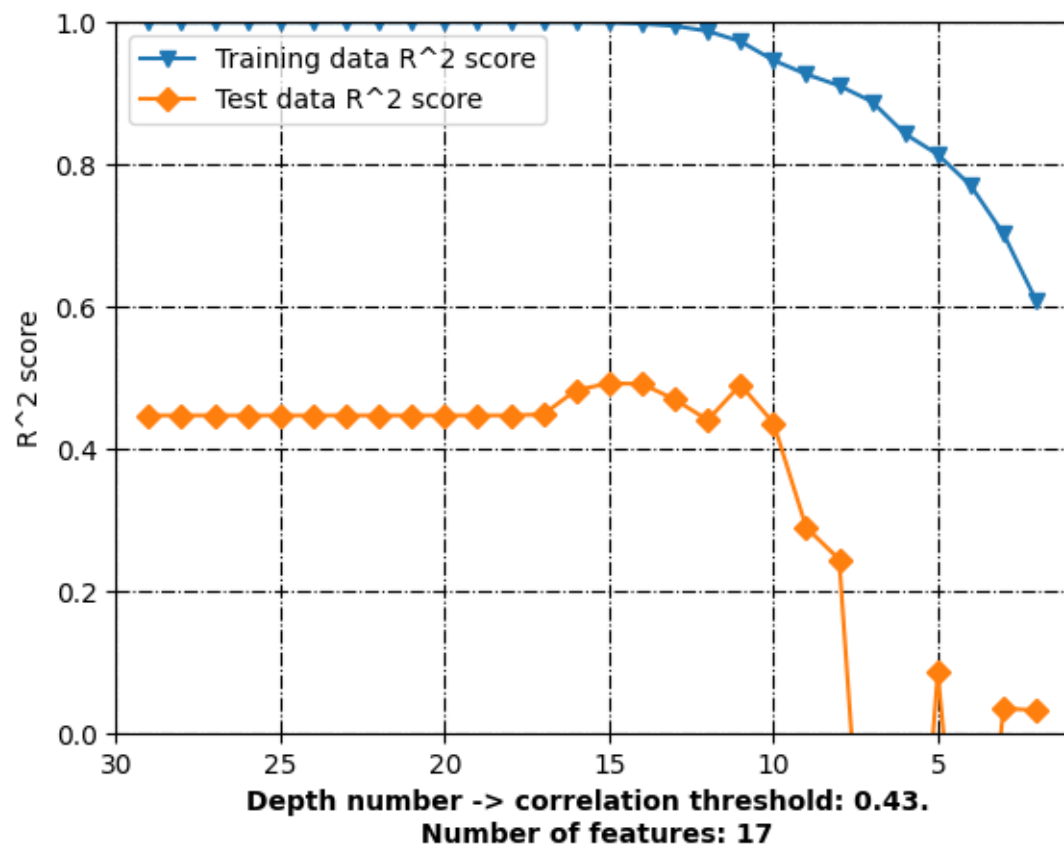

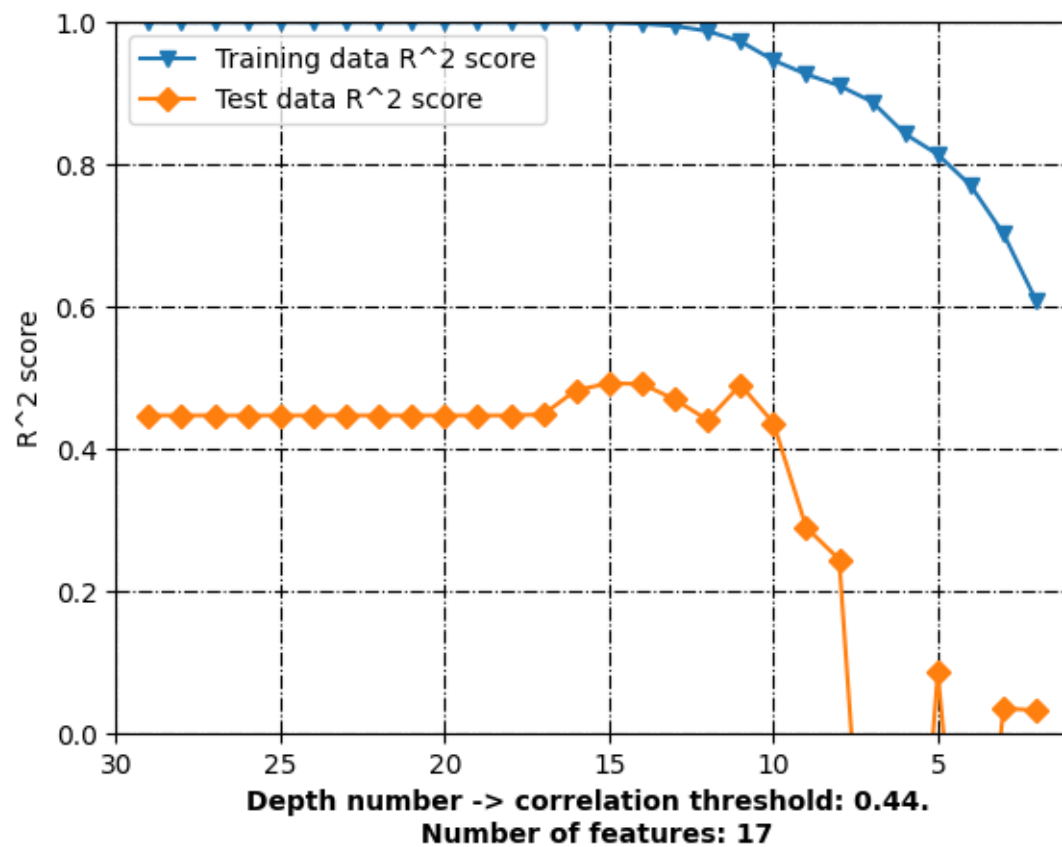

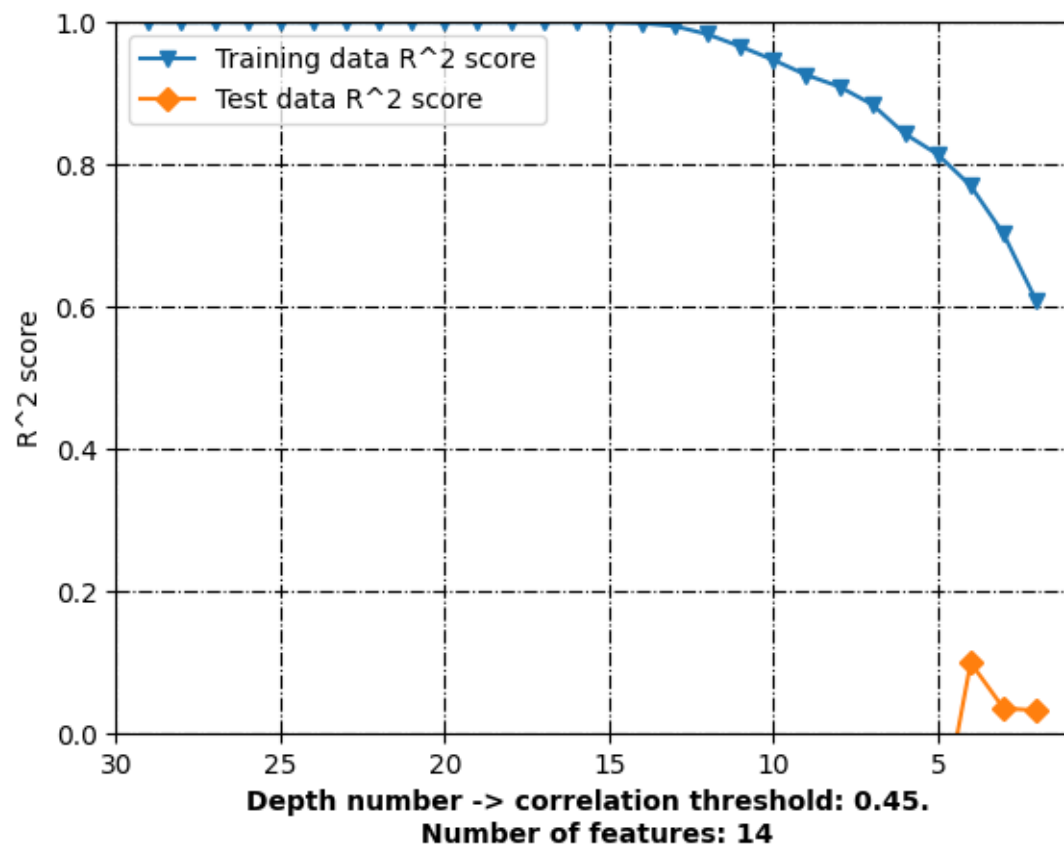

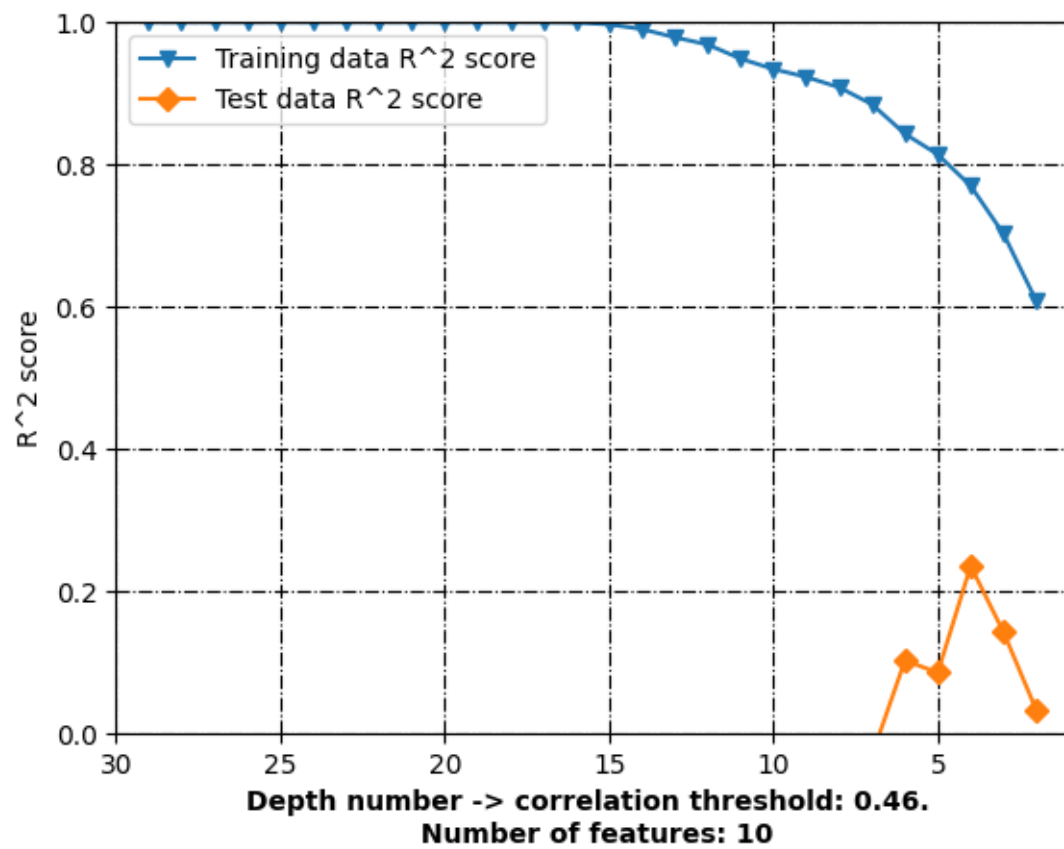

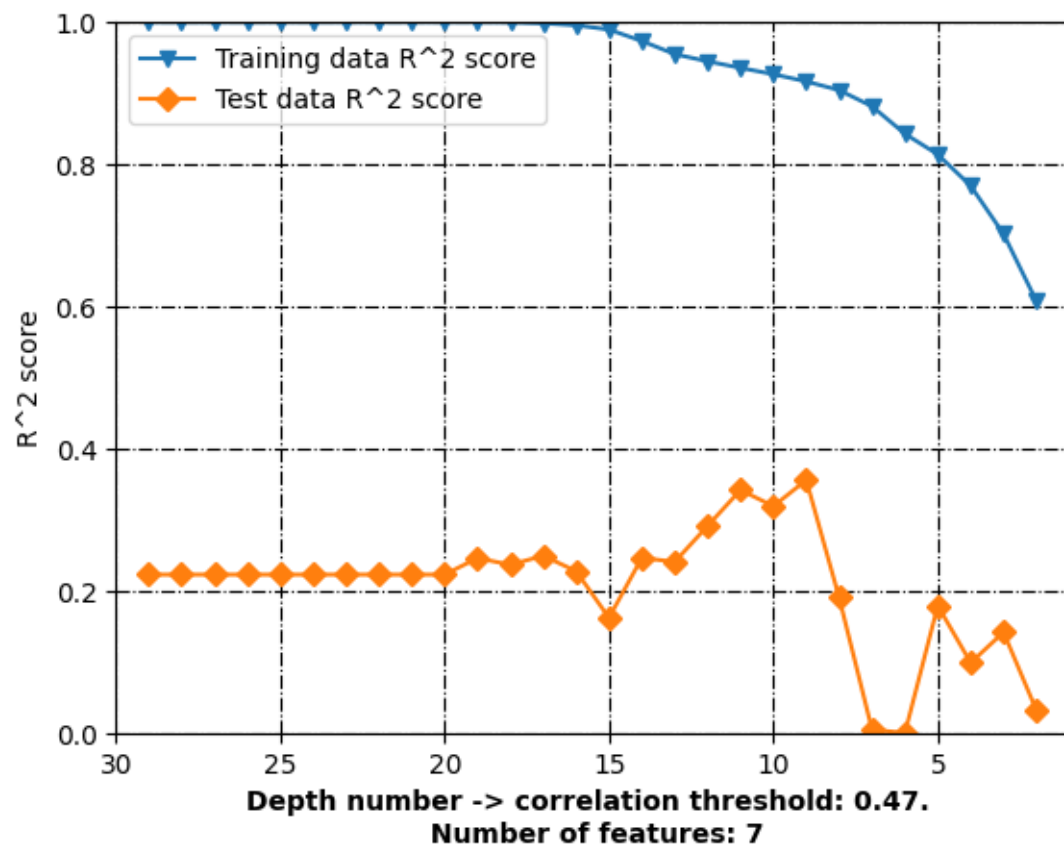

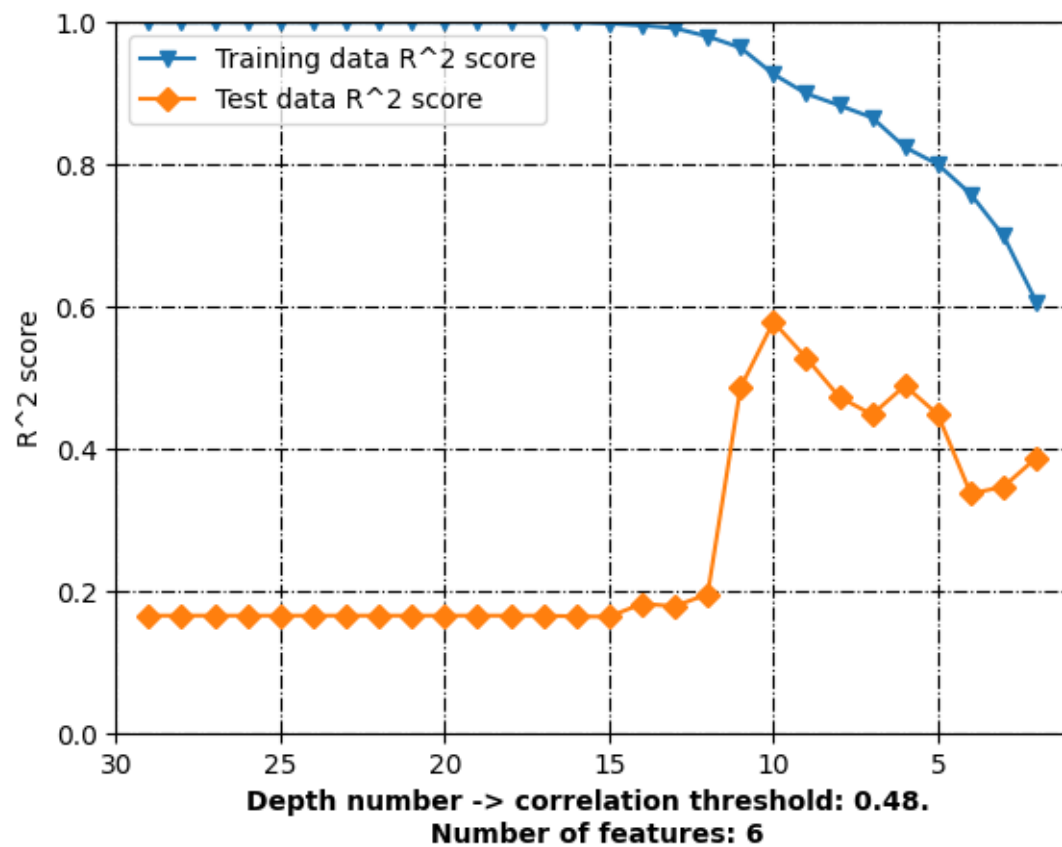

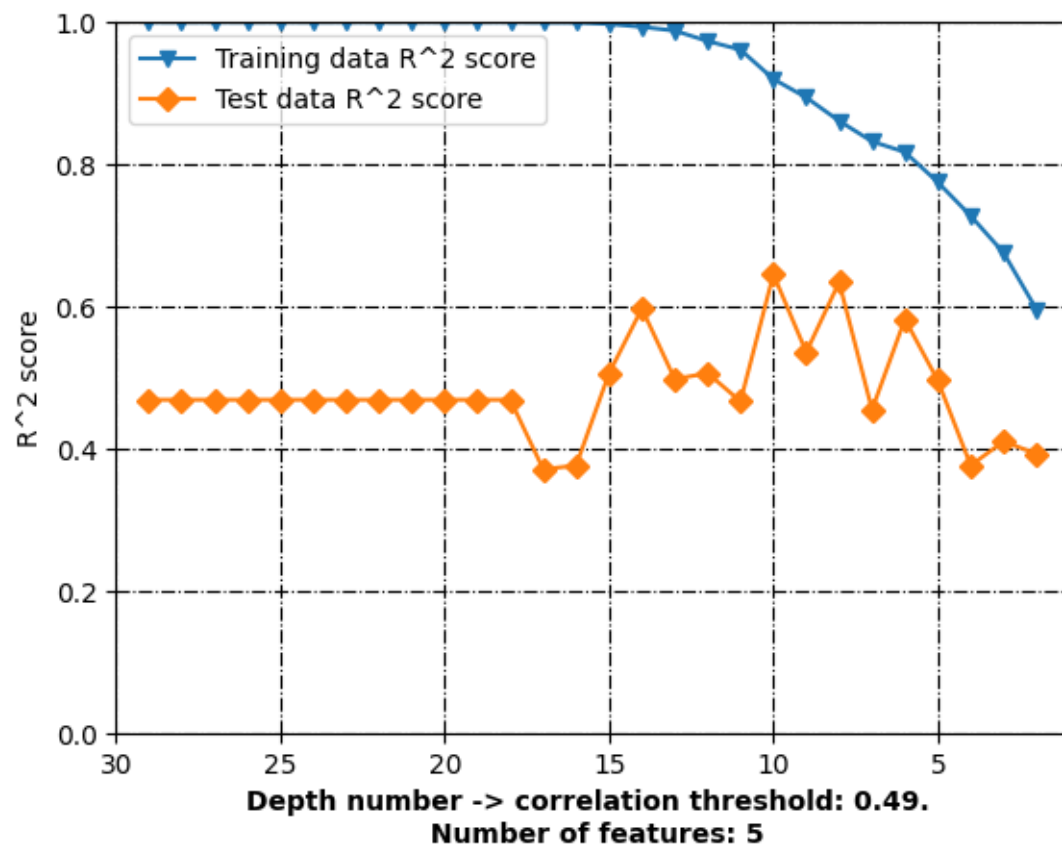



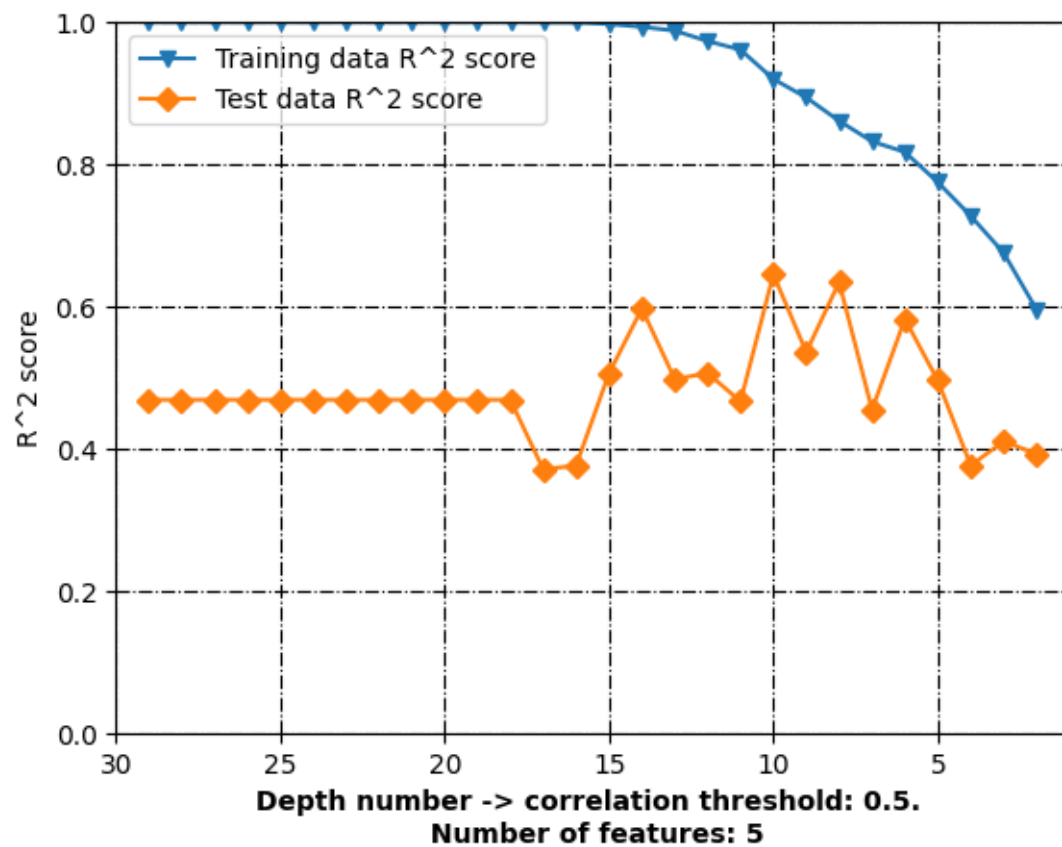

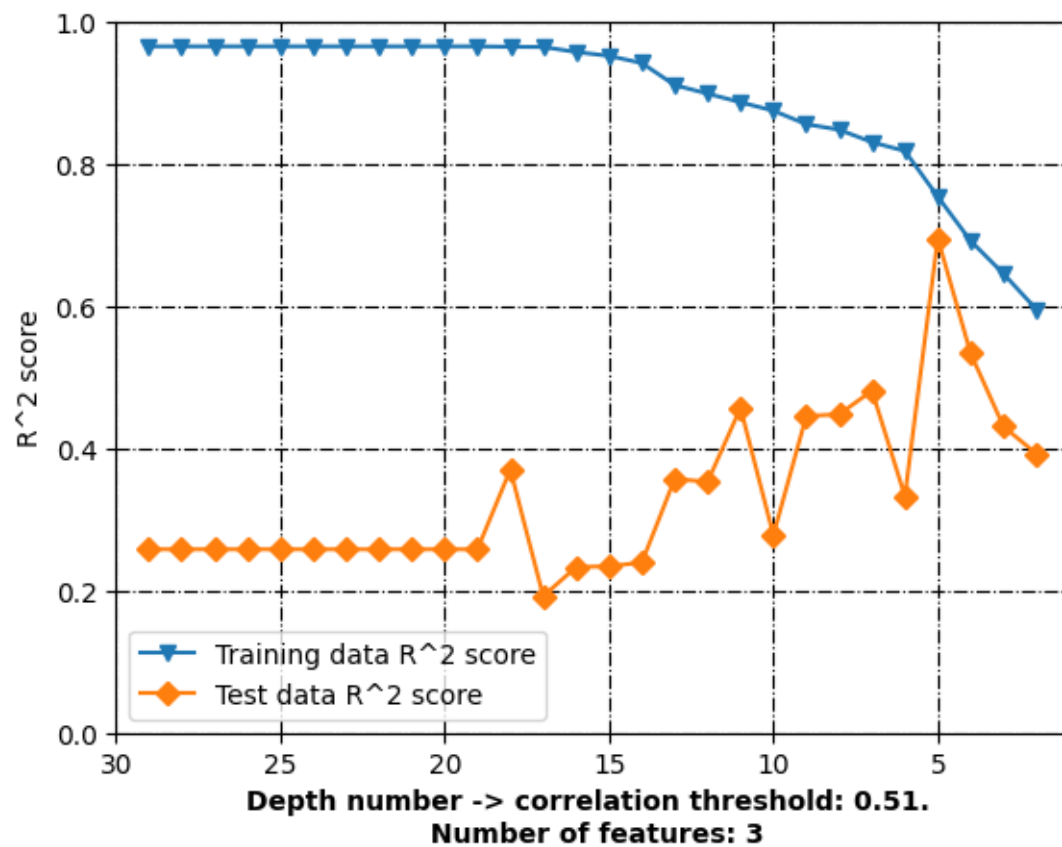

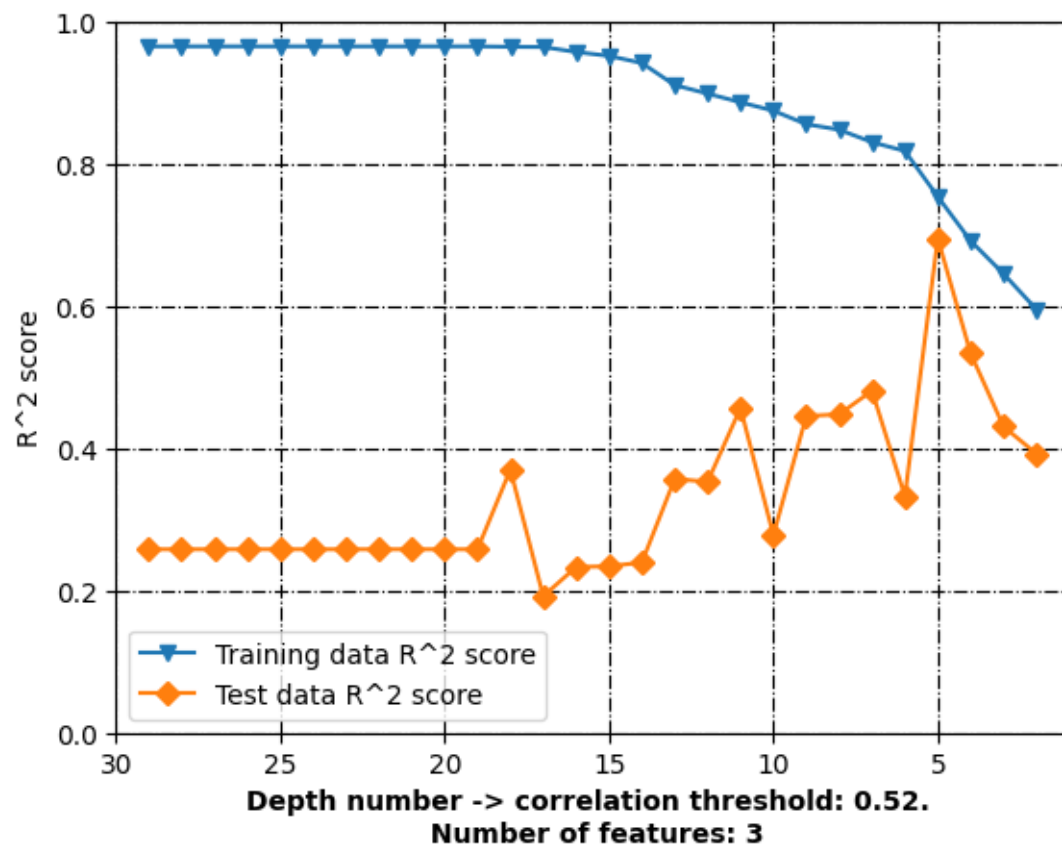

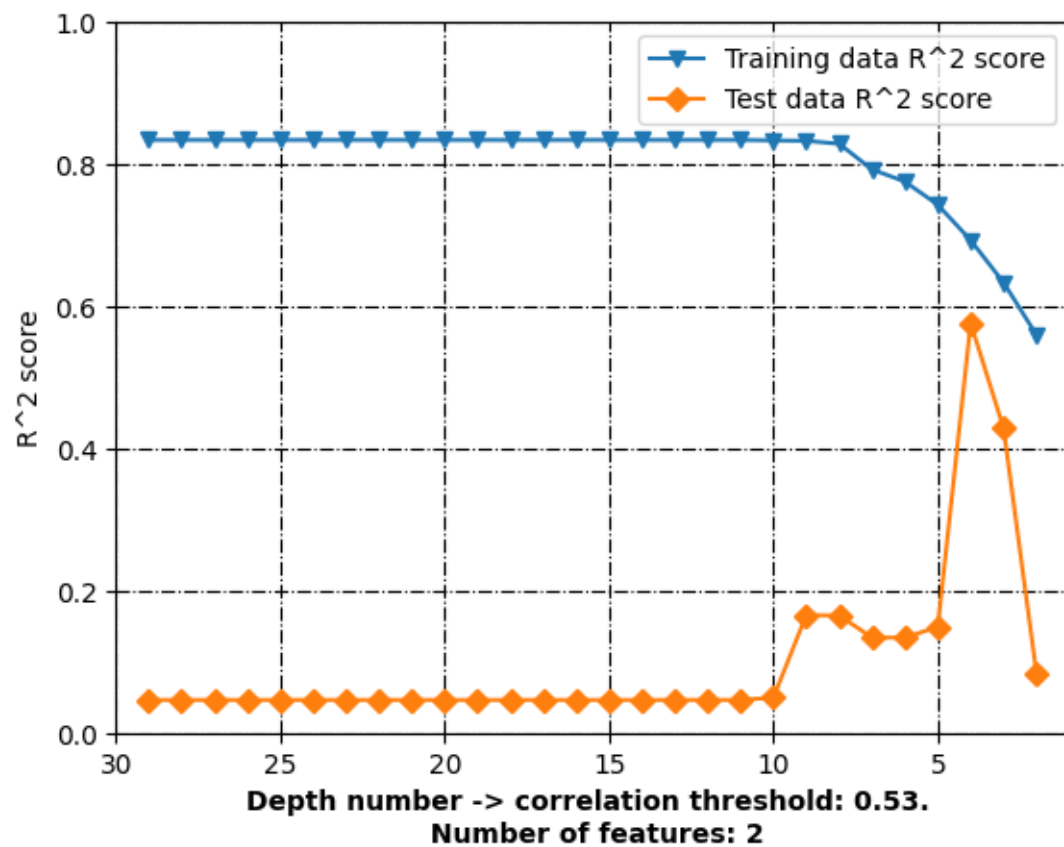

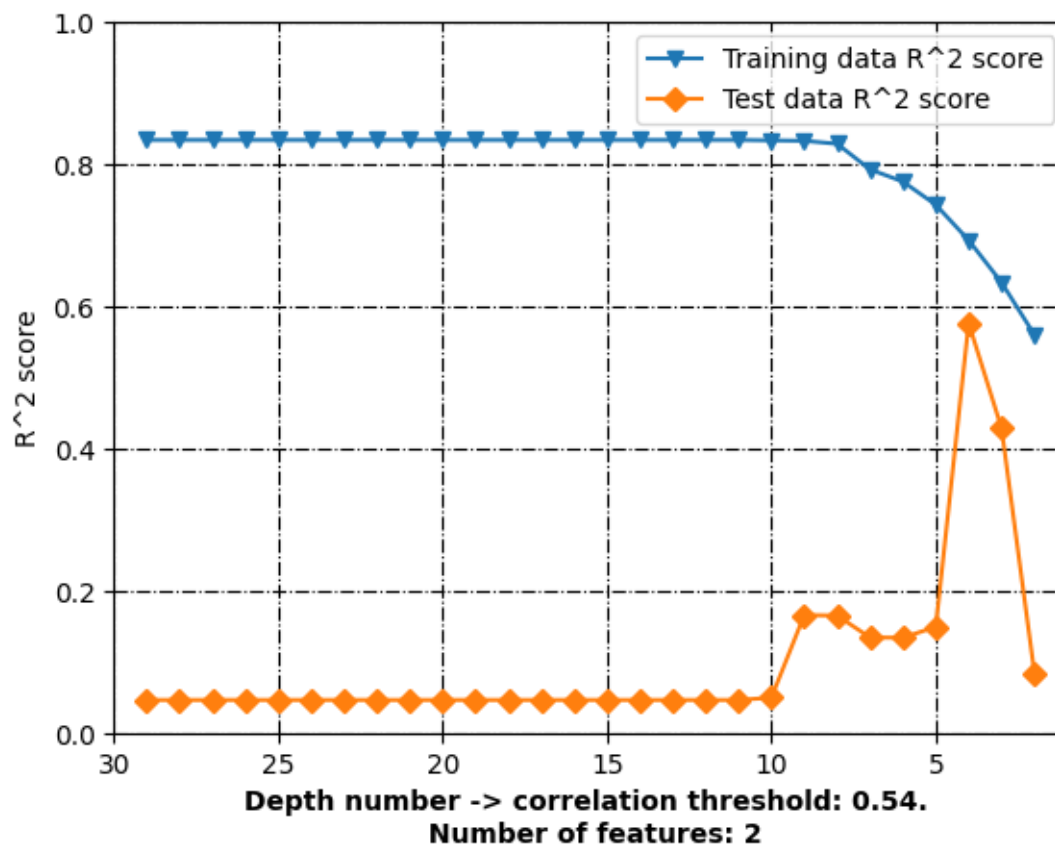

```
[20]: plt.plot(df_without_standardization['Correlation threshold'],  
             df_without_standardization['Number of features'], label = "Number of  
             features", marker='.')  
plt.legend()  
plt.xlabel('Correlation threshold')  
plt.ylabel('Number of features')  
plt.show()
```



[ ]:

### 3 Random Forest

```
[21]: without_standardization, train_r2_, test_r2_, hist1, hist2, target_column_name,
      ↪ training_data_RMSE, test_data_RMSE = pred_model.
      ↪ prepare_data_and_create_model(molecular_descriptors_df=data,
      ↪
      ↪         correlation_threshold=0.50,
      ↪
      ↪         standardization=False,
      ↪
      ↪         model_type='RandomForestRegressor',
      ↪
      ↪         n_estimators=12,
      ↪
      ↪         target_column_name = target,
      ↪
      ↪         random_state=random_state,
```

```

↪          train_test_split_=True,
↪          verbose=True)

```

I am not doing standardization...

```

molecular descriptor name
0          AATSOZ
1          AATSOare
2          AATSOd
3          AATSOdv
4          AATSOi
molecular descriptor name  corr_value
0          AATSOZ      -0.027037
1          AATSOare    -0.129823
2          AATSOd      0.042740
3          AATSOdv     -0.120173
4          AATSOi      0.132395
molecular descriptor name  corr_value  absolute correlation value
0          AATSOZ      -0.027037          0.027037
1          AATSOare    -0.129823          0.129823
2          AATSOd      0.042740          0.042740
3          AATSOdv     -0.120173          0.120173
4          AATSOi      0.132395          0.132395
molecular descriptor name  corr_value  absolute correlation value
226          AMID_0      -0.524157          0.524157
505          EState_VSA5 -0.579664          0.579664
791          MDEO-12     -0.558727          0.558727
851          NdssC       -0.506855          0.506855
1091         VSA_EState5  0.503578          0.503578
molecular descriptor name  corr_value  absolute correlation value
226          AMID_0      -0.524157          0.524157
505          EState_VSA5 -0.579664          0.579664
791          MDEO-12     -0.558727          0.558727
851          NdssC       -0.506855          0.506855
1091         VSA_EState5  0.503578          0.503578
The model used is: RandomForest...
Return the coefficient of determination of the prediction:
0.5325679351654988
R^2 score: 0.8956653627358289
Correlation coefficient: 0.946395986221322
Test data - unseen during training:
R^2 score: 0.5325679351654988
Correlation coefficient: 0.7297725228901804
[8.18549545 6.43267746 7.90373055 7.07002075 7.91925871 8.28997064
 8.072342   7.49377386 7.18387349 7.91093882 7.97294975 8.01110989
 7.84943728 8.13009111 8.28997064 6.50109233 7.28812865 6.79273421]
113      7.795880

```

```
35      6.254925
101     7.275724
36      7.017729
100     7.337242
13      8.055517
0       8.187087
114     7.638272
104     8.318759
96      7.769551
40      8.050610
103     8.136677
48      7.853872
39      8.267606
14      7.273273
117     6.167491
21      7.554396
9       6.343902
```

```
Name: LoVo, dtype: float64
```

```
Training Root Mean Square Error: 0.3031713551240315
```

```
Testing Root Mean Square Error: 0.4579105131310473
```

```
[22]: print(target_column_name+str('_transformed'))
      print(hist1[target_column_name].hist())
```

```
LoVo_transformed
```

```
AxesSubplot(0.125,0.11;0.775x0.77)
```





```
[23]: with_standardization, train_r2_, test_r2_, hist1, hist2, target_column_name,
      ↪ training_data_RMSE, test_data_RMSE = pred_model.
      ↪ prepare_data_and_create_model(molecular_descriptors_df=data,
      ↪
      ↪         correlation_threshold=0.50,
      ↪
      ↪         standardization=True,
      ↪
      ↪         model_type='RandomForestRegressor',
      ↪
      ↪         n_estimators=12,
      ↪
      ↪         target_column_name = target,
      ↪
      ↪         random_state=random_state,
      ↪
      ↪         train_test_split=True,
      ↪
      ↪         verbose=True)
```

I am doing standardization...  
molecular descriptor name

|      |                           |            |                            |
|------|---------------------------|------------|----------------------------|
| 0    | AATSOZ                    |            |                            |
| 1    | AATSOare                  |            |                            |
| 2    | AATSOd                    |            |                            |
| 3    | AATSOdv                   |            |                            |
| 4    | AATSOi                    |            |                            |
|      | molecular descriptor name | corr_value |                            |
| 0    | AATSOZ                    | -0.027037  |                            |
| 1    | AATSOare                  | -0.129823  |                            |
| 2    | AATSOd                    | 0.042740   |                            |
| 3    | AATSOdv                   | -0.120173  |                            |
| 4    | AATSOi                    | 0.132395   |                            |
|      | molecular descriptor name | corr_value | absolute correlation value |
| 0    | AATSOZ                    | -0.027037  | 0.027037                   |
| 1    | AATSOare                  | -0.129823  | 0.129823                   |
| 2    | AATSOd                    | 0.042740   | 0.042740                   |
| 3    | AATSOdv                   | -0.120173  | 0.120173                   |
| 4    | AATSOi                    | 0.132395   | 0.132395                   |
|      | molecular descriptor name | corr_value | absolute correlation value |
| 226  | AMID_0                    | -0.524157  | 0.524157                   |
| 505  | EState_VSA5               | -0.579664  | 0.579664                   |
| 791  | MDEO-12                   | -0.558727  | 0.558727                   |
| 851  | NdssC                     | -0.506855  | 0.506855                   |
| 1091 | VSA_EState5               | 0.503578   | 0.503578                   |
|      | molecular descriptor name | corr_value | absolute correlation value |
| 226  | AMID_0                    | -0.524157  | 0.524157                   |
| 505  | EState_VSA5               | -0.579664  | 0.579664                   |
| 791  | MDEO-12                   | -0.558727  | 0.558727                   |
| 851  | NdssC                     | -0.506855  | 0.506855                   |
| 1091 | VSA_EState5               | 0.503578   | 0.503578                   |

The model used is: RandomForest...

Return the coefficient of determination of the prediction:  
0.5325679351654988

R<sup>2</sup> score: 0.8956653627358289

Correlation coefficient: 0.946395986221322

Test data - unseen during training:  
R<sup>2</sup> score: 0.5325679351654988

Correlation coefficient: 0.7297725228901804

[8.18549545 6.43267746 7.90373055 7.07002075 7.91925871 8.28997064  
8.072342 7.49377386 7.18387349 7.91093882 7.97294975 8.01110989  
7.84943728 8.13009111 8.28997064 6.50109233 7.28812865 6.79273421]  
113 7.795880  
35 6.254925  
101 7.275724  
36 7.017729  
100 7.337242  
13 8.055517  
0 8.187087  
114 7.638272

```

104    8.318759
96    7.769551
40    8.050610
103    8.136677
48    7.853872
39    8.267606
14    7.273273
117    6.167491
21    7.554396
9     6.343902

```

Name: LoVo, dtype: float64

Training Root Mean Square Error: 0.3031713551240315

Testing Root Mean Square Error: 0.4579105131310473

### 3.1 Search inside correlation space

```

[24]: step = 0.01
initial_step = corr_low
last_step = corr_high
first_list = [x / 100.0 for x in range(int(initial_step*100),
    ↪int(last_step*100), int(step*100))]
n_estimators = [range(2,21,1)]
corr_th = []
second_list = []
third_list = []
fourth_l = []
fifth_l = []
f_list = []
fif_list = []
for i in first_list:

    for estimator in n_estimators[0]:

        without_standardization, train_r2, test_r2, _, h_, target_column_name,
    ↪training_data_RMSE, test_data_RMSE = pred_model.
    ↪prepare_data_and_create_model(molecular_descriptors_df=data,

    ↪                                correlation_threshold=i,

    ↪                                standardization=False,

    ↪                                model_type='RandomForestRegressor',

    ↪                                n_estimators_=estimator,

    ↪                                target_column_name = target,

```

```

    random_state=random_state,

    train_test_split_=True,

    verbose=False)
    corr_th.append(i)
    second_list.append(train_r2)
    third_list.append(test_r2)
    fourth_l.append(training_data_RMSE)
    fifth_l.append(test_data_RMSE)
    f_list.append(len(h_))
    fif_list.append(estimator)

```

```

[25]: df_without_standardization = pd.DataFrame(data=corr_th, columns=["Correlation_
    ↪threshold"])
df_without_standardization['Training data R^2 score'] = second_list
df_without_standardization['Test data R^2 score'] = third_list
df_without_standardization['Training RMSE'] = fourth_l
df_without_standardization['Test RMSE'] = fifth_l
df_without_standardization['Number of features'] = f_list
df_without_standardization['Number of estimators'] = fif_list

```

```

[26]: df_random_forest = df_without_standardization.copy()
#df_without_standardization.to_excel('../Data/
    ↪A549_Random_forest_rs_'+str(random_state)+'_xlsx')

```

```

[27]: corre_list = [x / 100.0 for x in range(int(initial_step*100),
    ↪int(last_step*100), int(0.01*100))]
for element in corre_list:
    element_ =
    ↪df_without_standardization[df_without_standardization['Correlation_
    ↪threshold'] == float(element)]
    plt.plot(element_['Number of estimators'], element_['Training data R^2_
    ↪score'], label = "Training data R^2 score", marker='v')
    plt.plot(element_['Number of estimators'], element_['Test data R^2 score'],
    ↪label = "Test data R^2 score", marker='D')
    plt.legend()
    plt.xlabel('Number of estimators -> correlation threshold: '+str(element)+'.'
    ↪\n Number of features: '+str(element_['Number of features'].iloc[0]))
    plt.xlim(max(element_['Number of estimators'])+1, min(element_['Number of_
    ↪estimators'])-1)
    plt.ylabel('R^2 score')
    plt.ylim([0, 1])
    plt.rc('grid', linestyle="-. ", color='black')
    plt.grid(True)

```

```
plt.show()
```

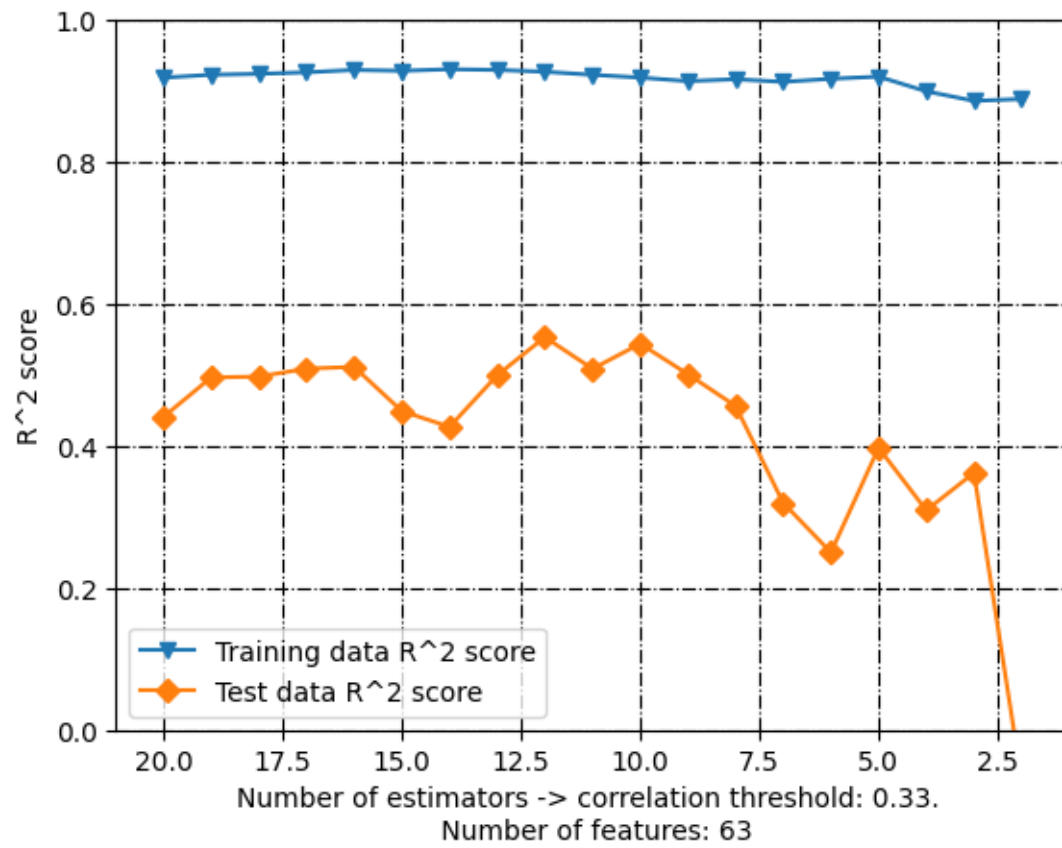

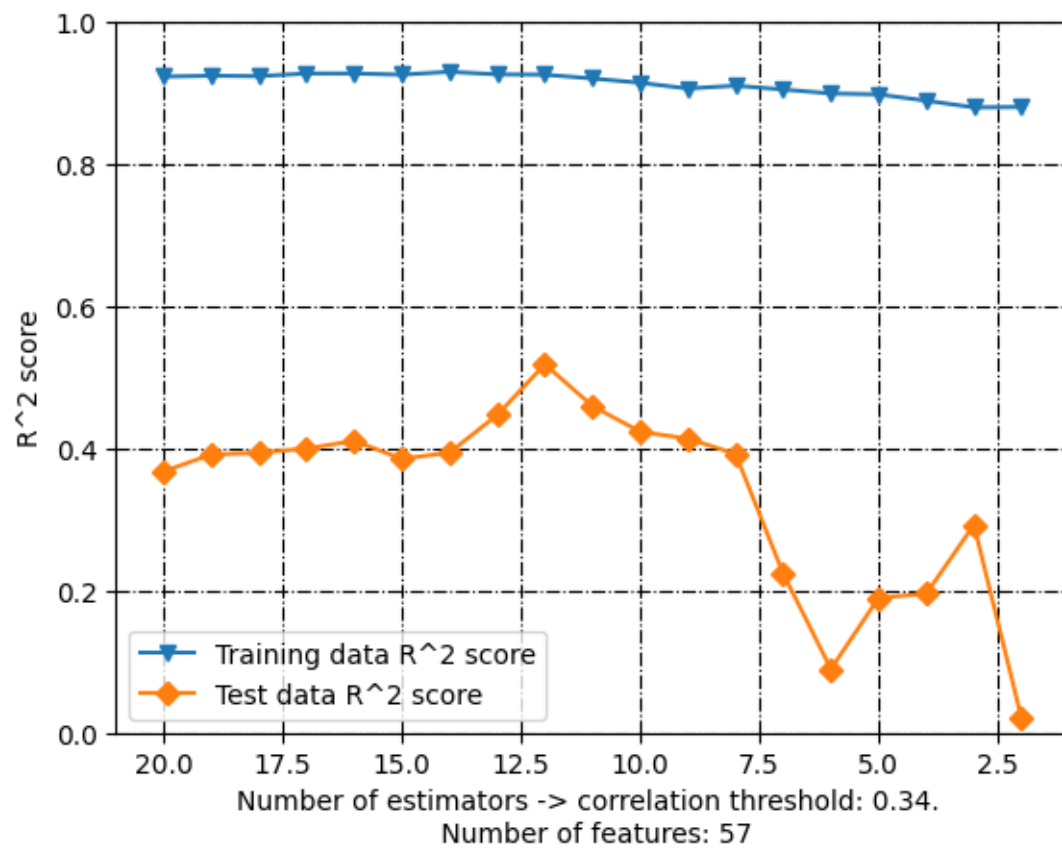

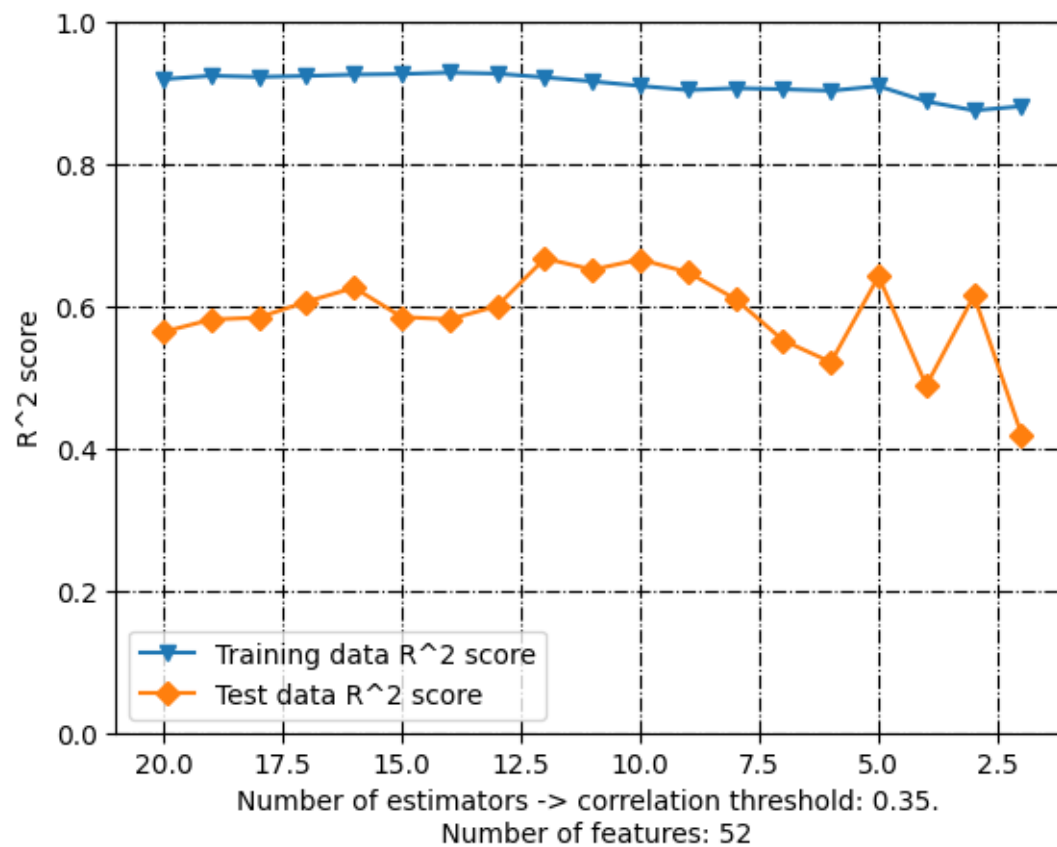

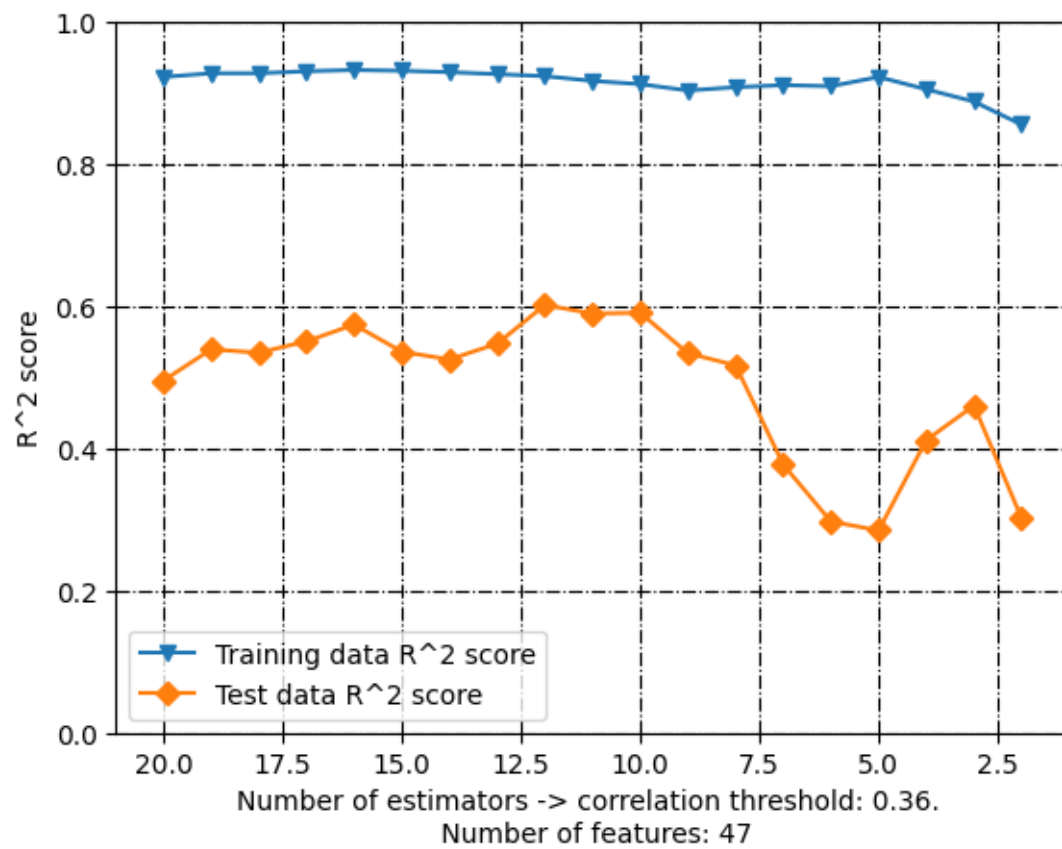



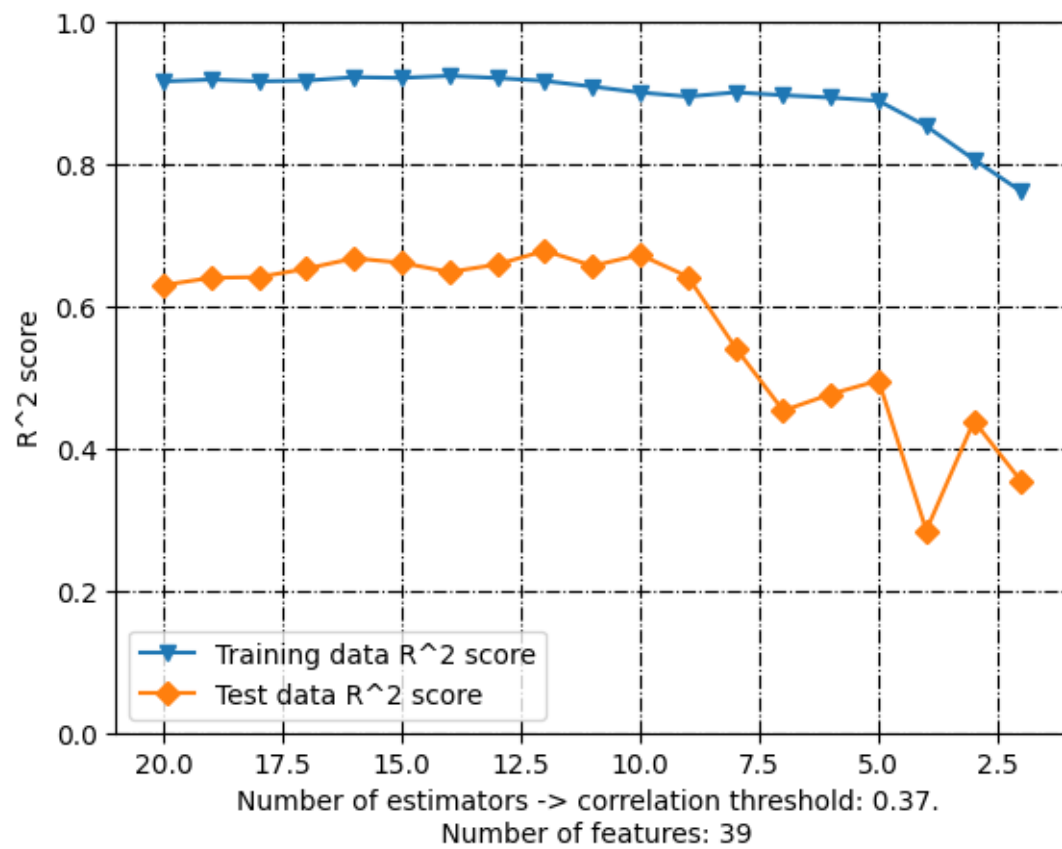

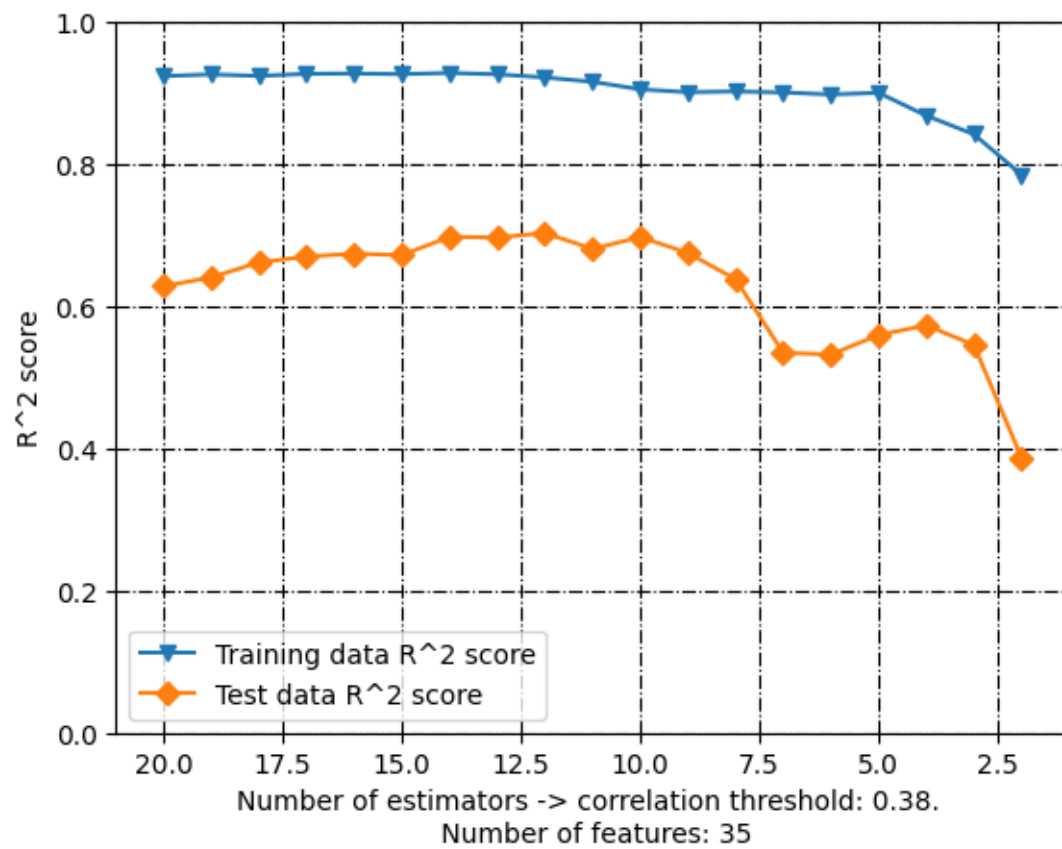

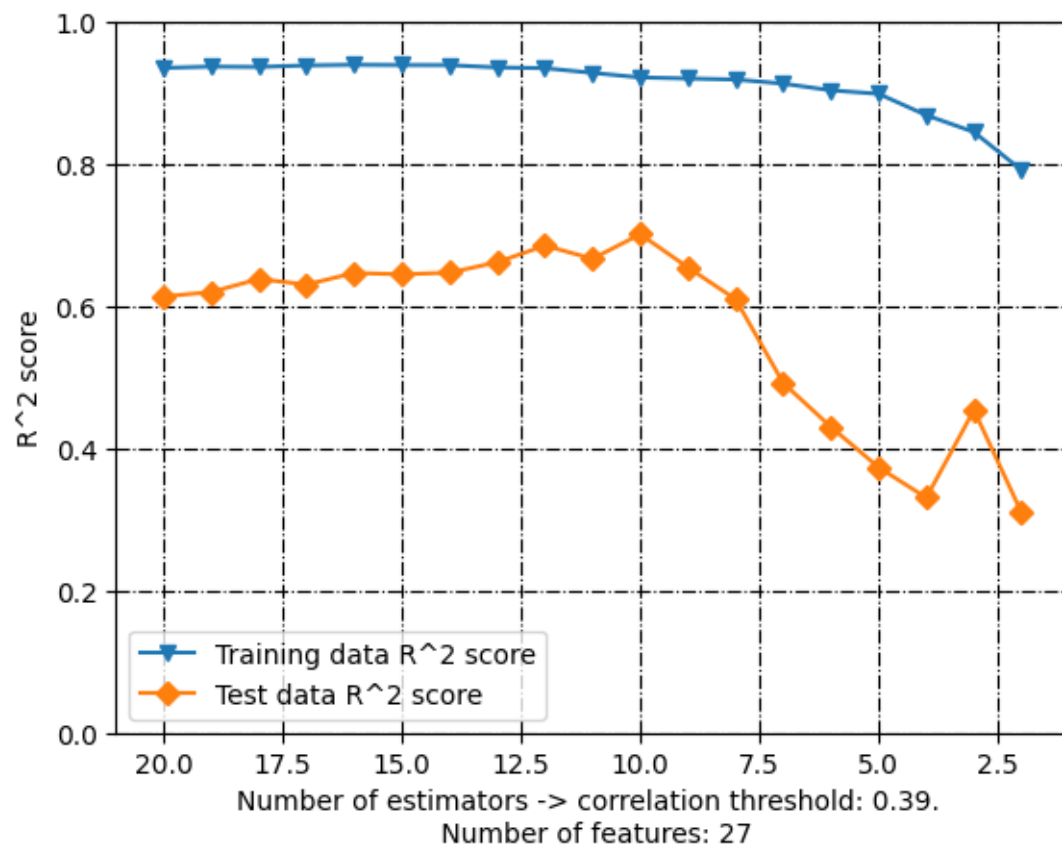

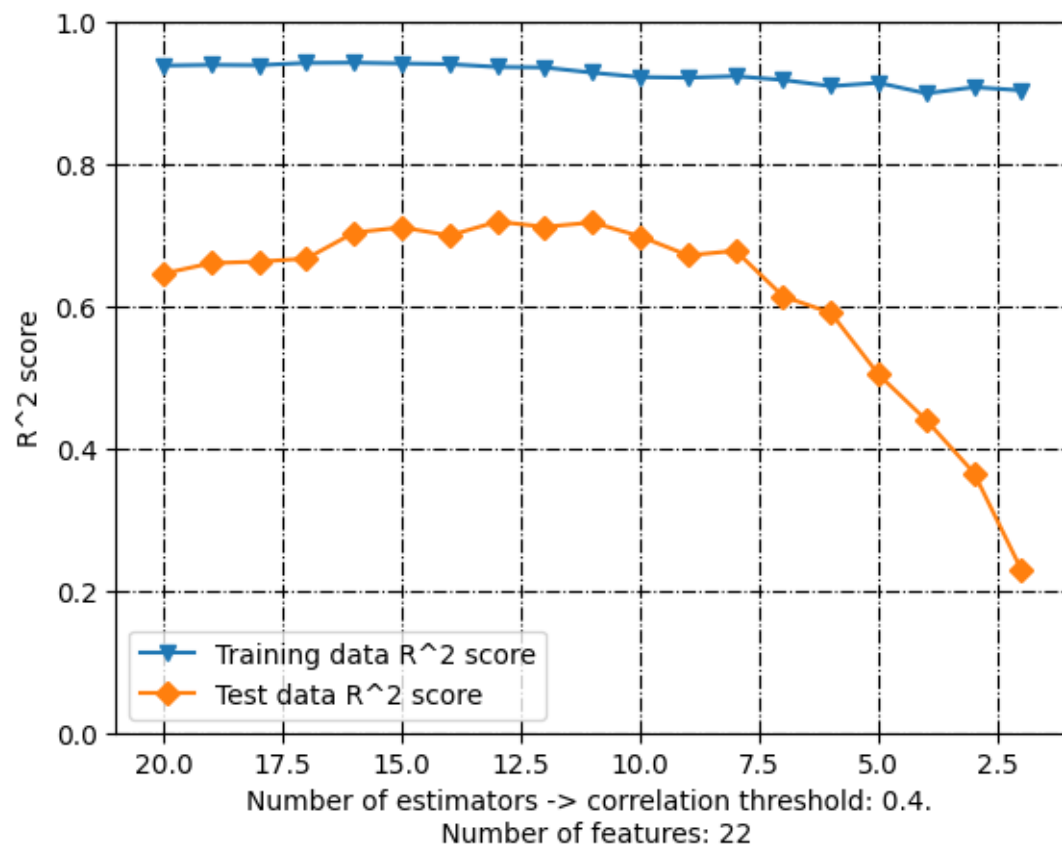

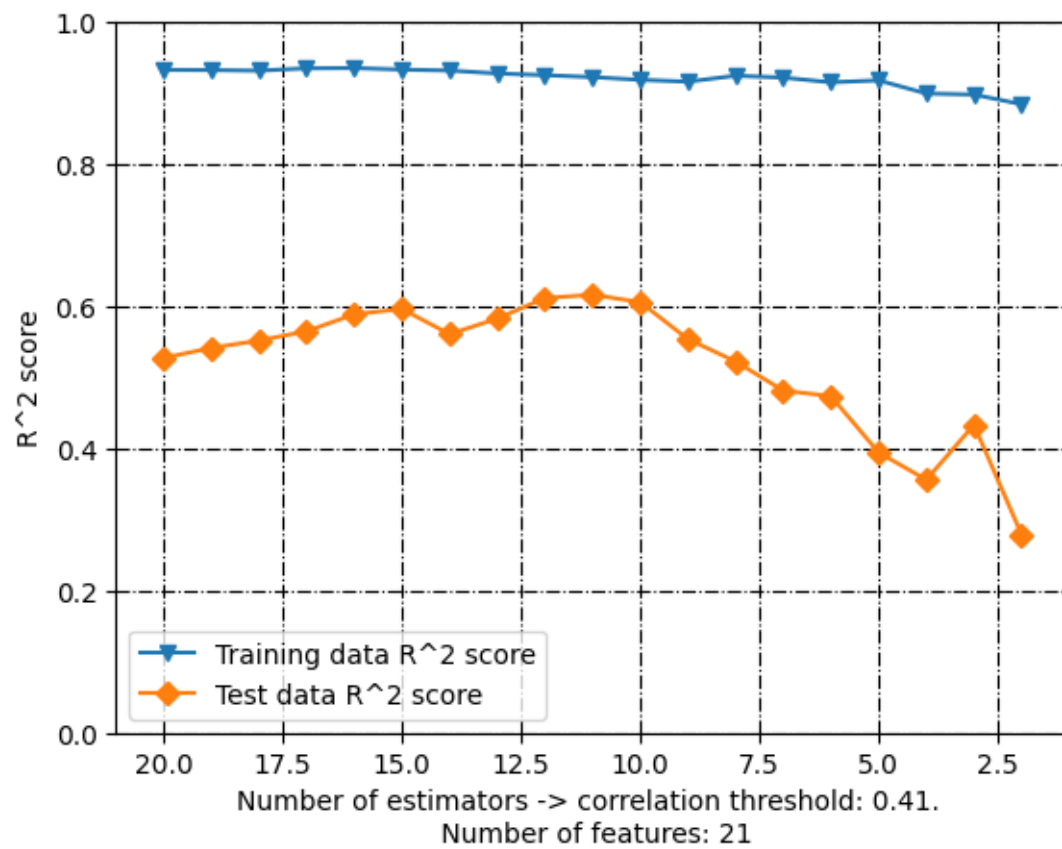

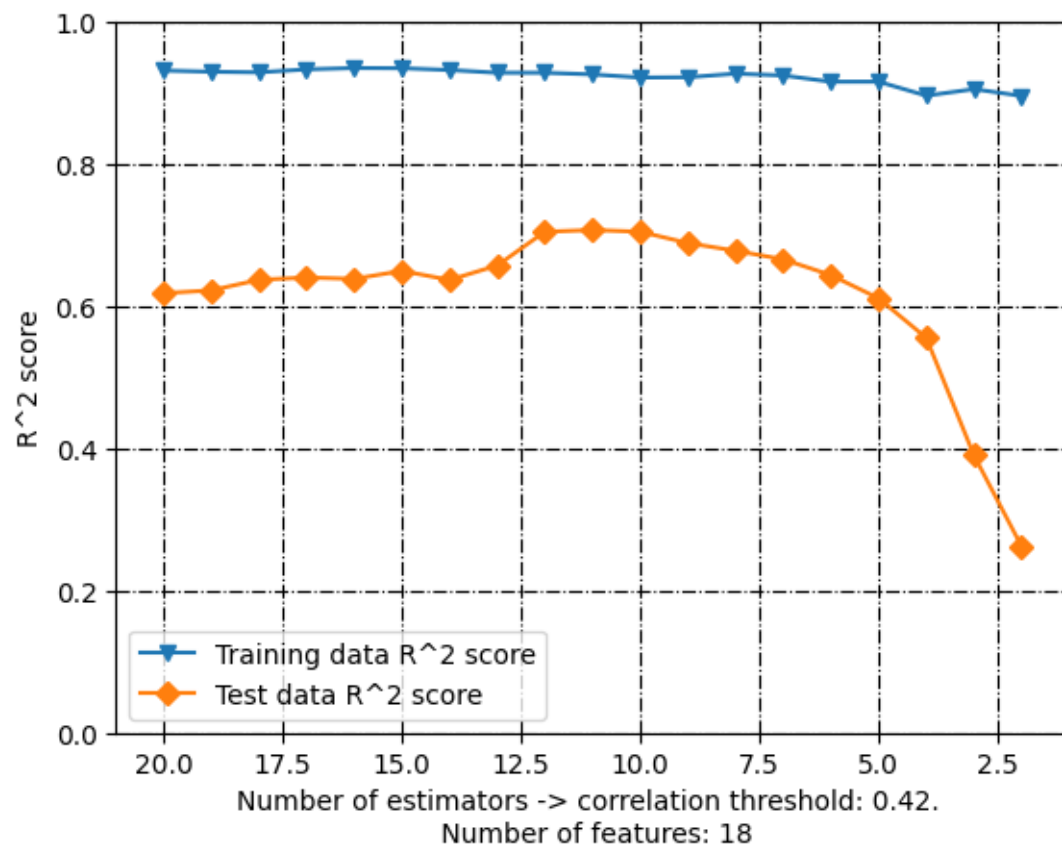

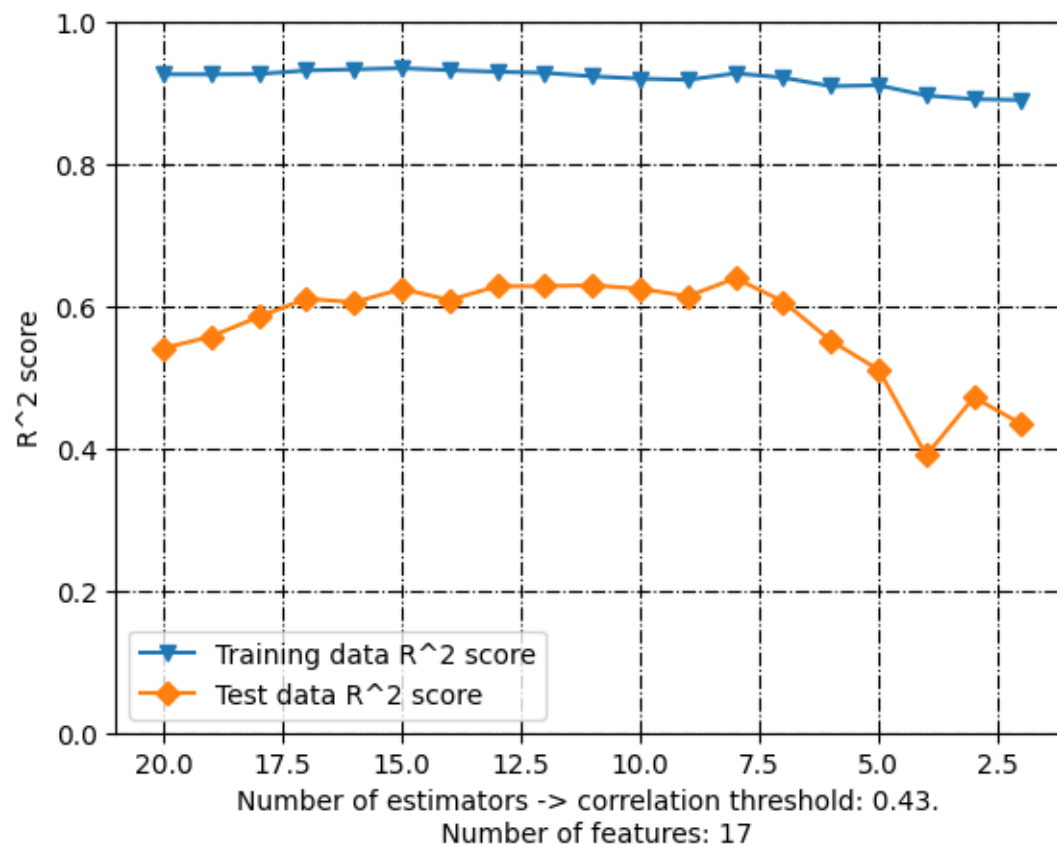

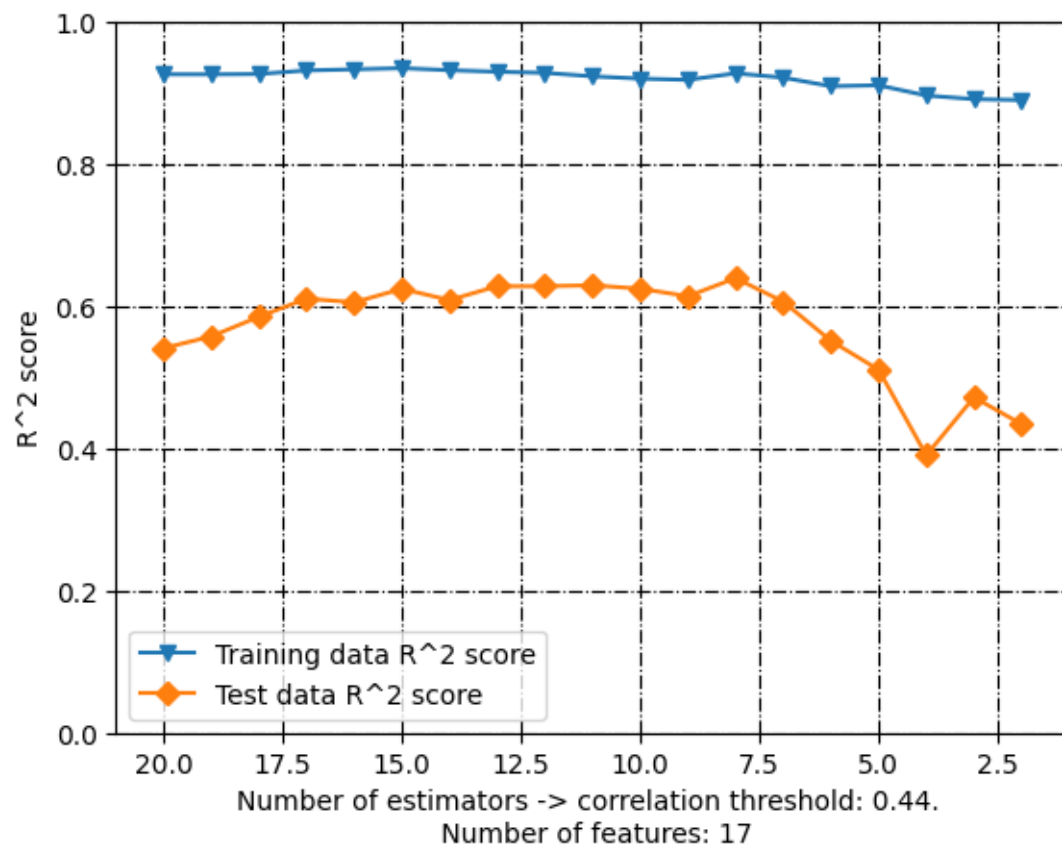



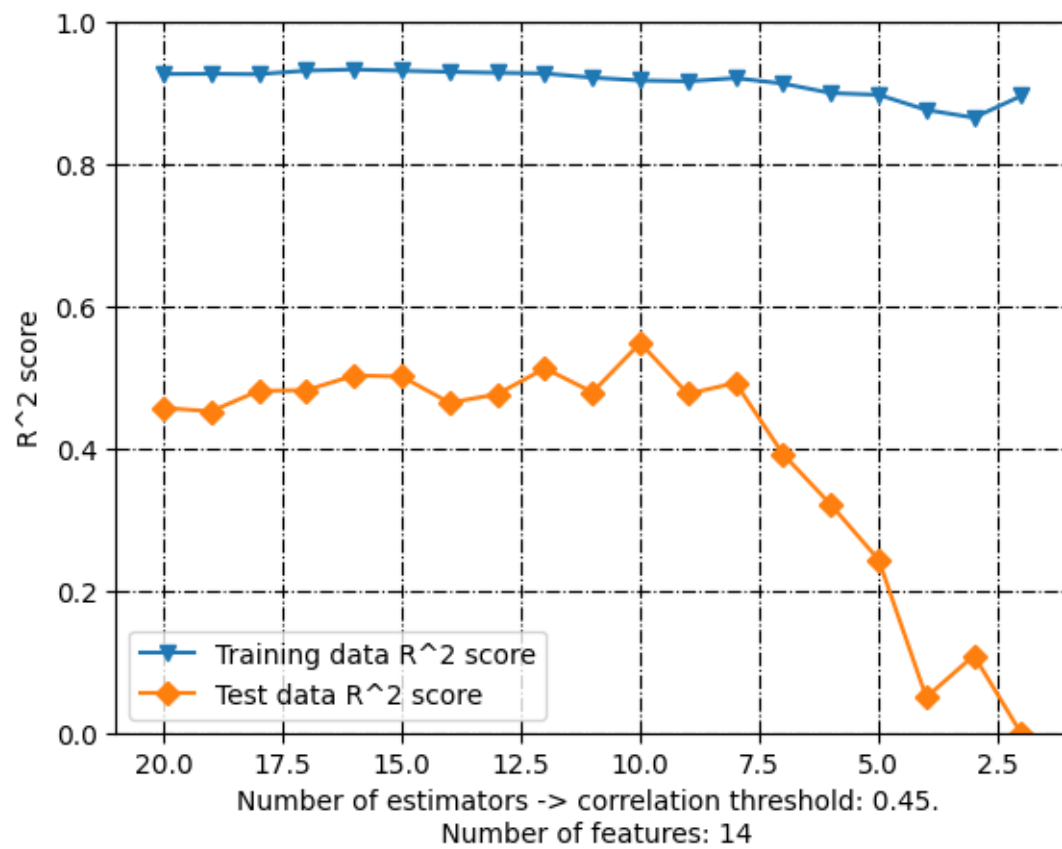

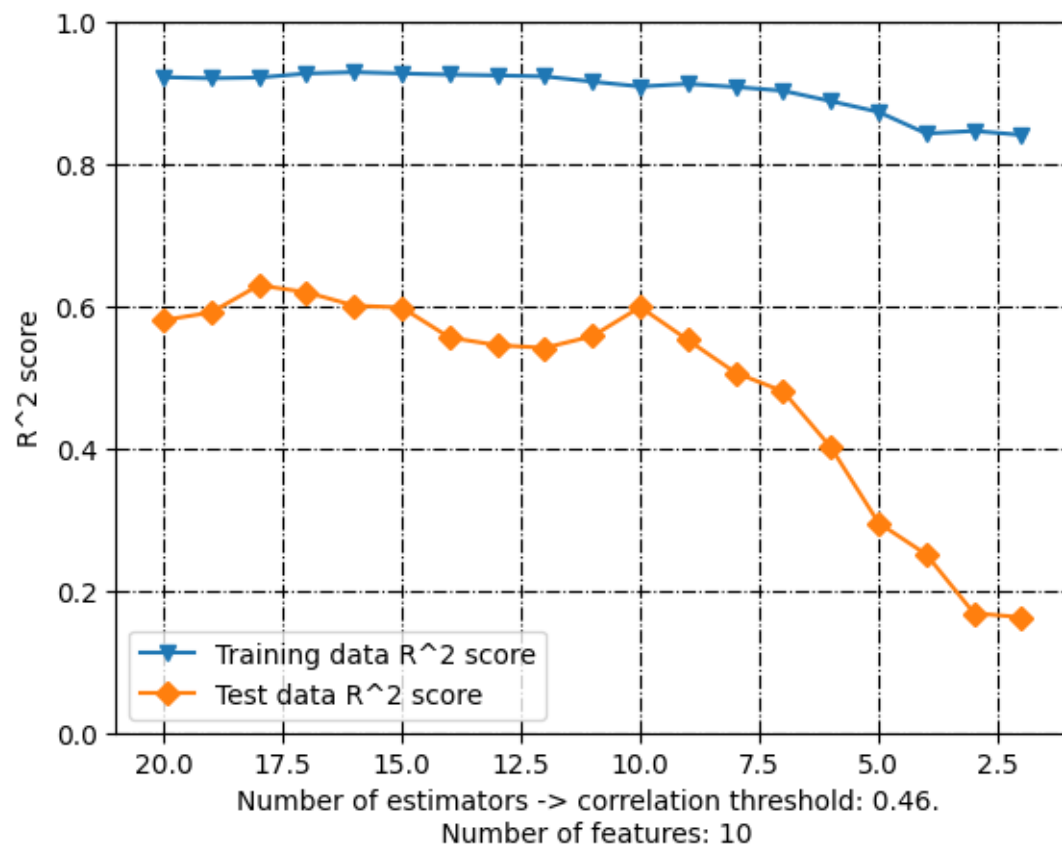

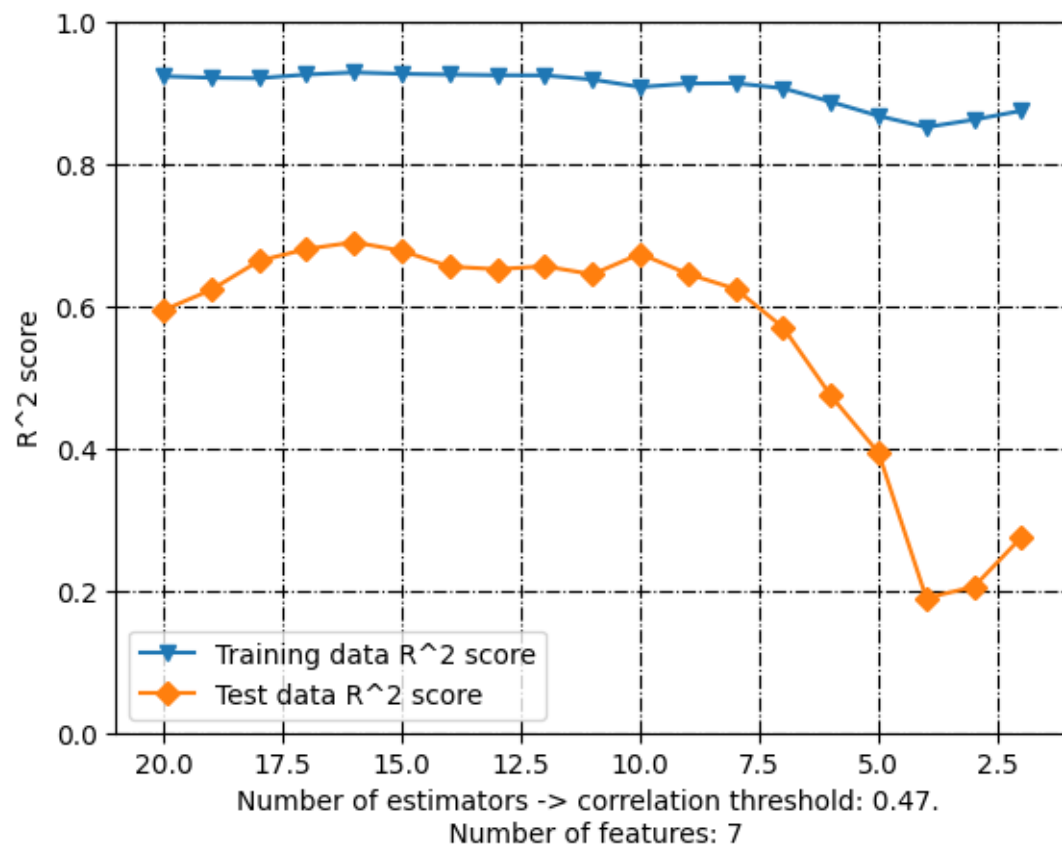

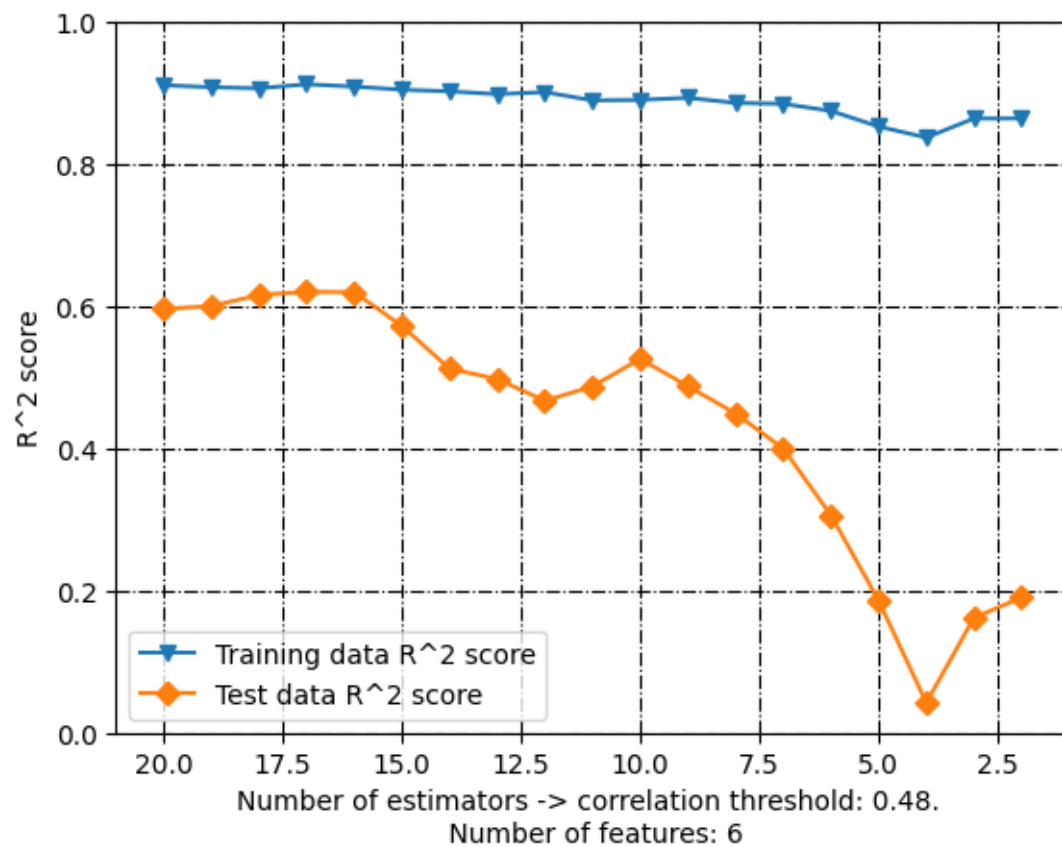

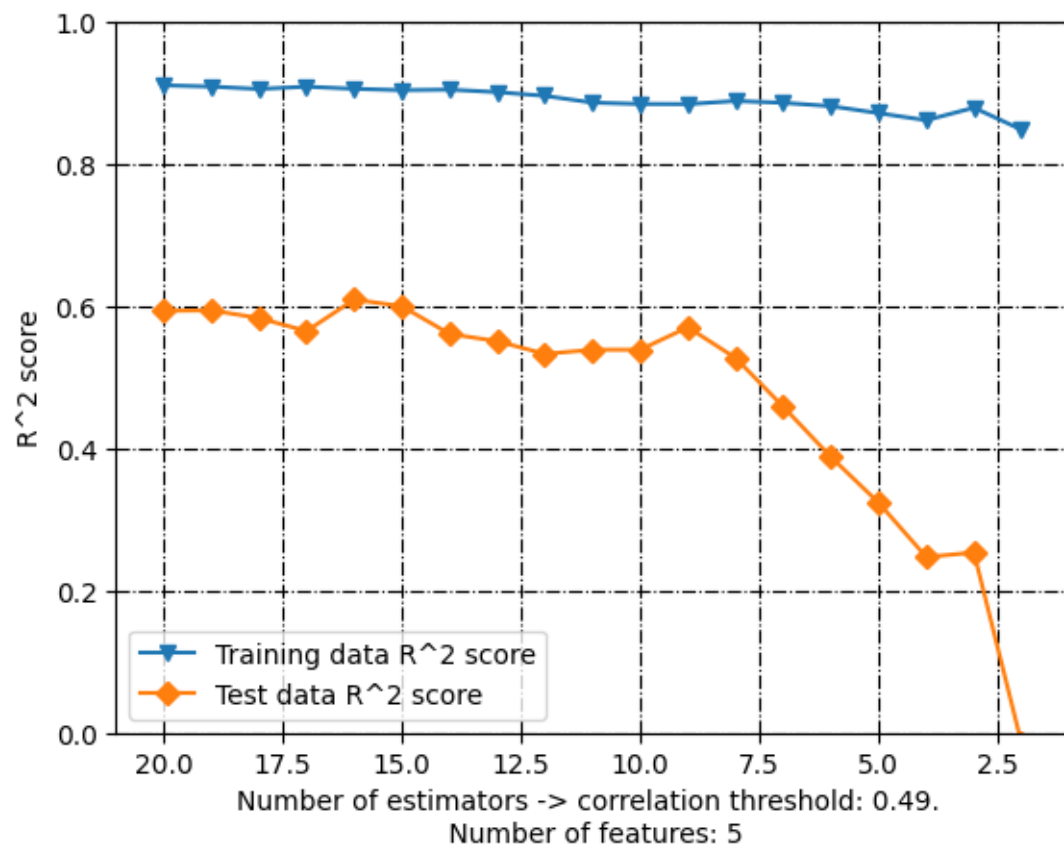

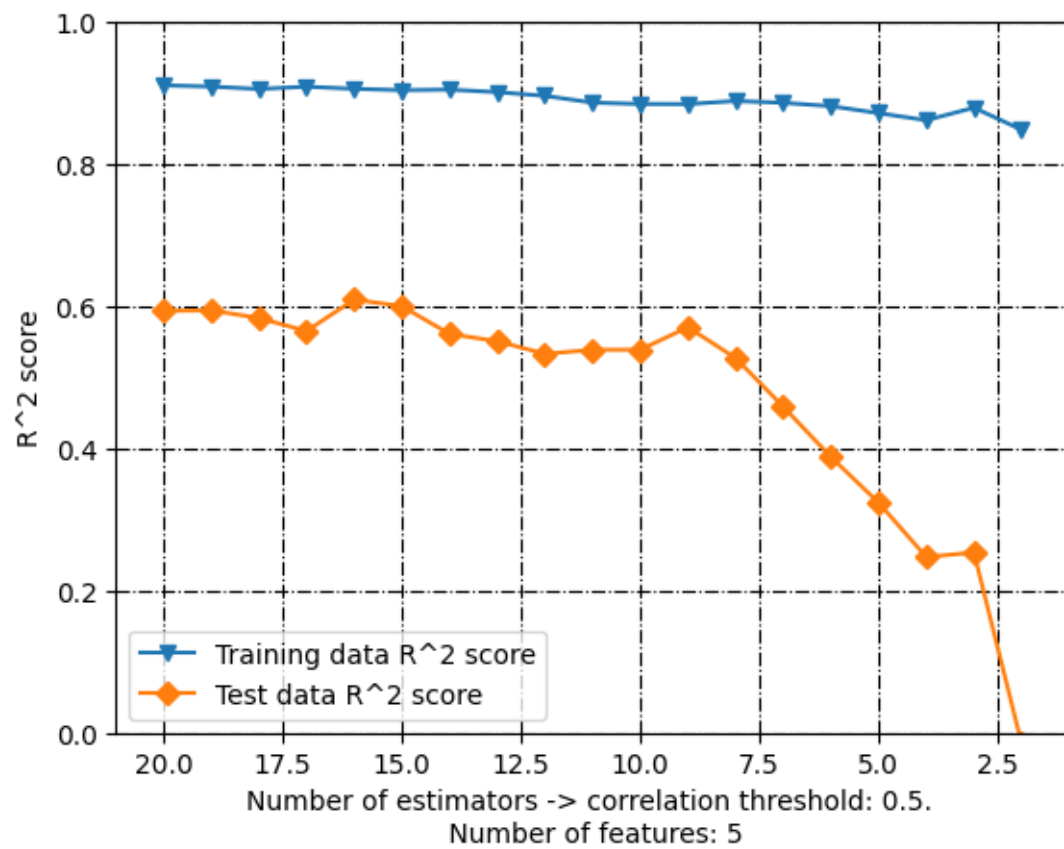

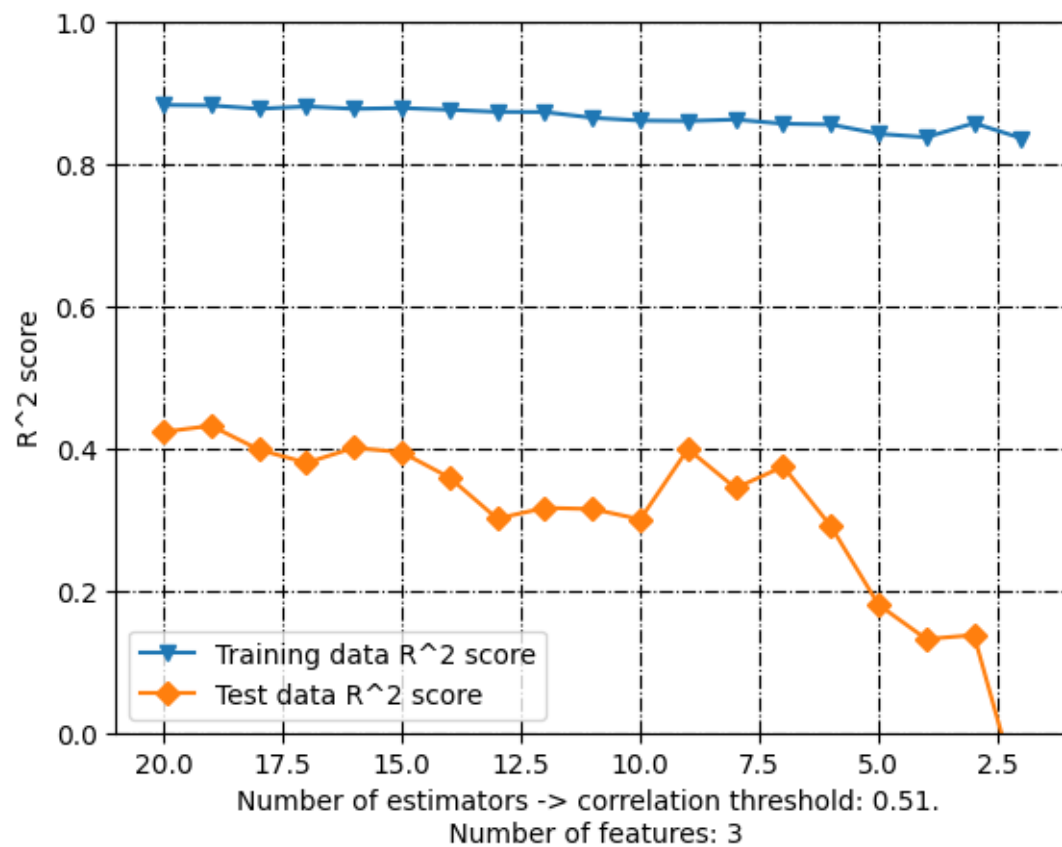

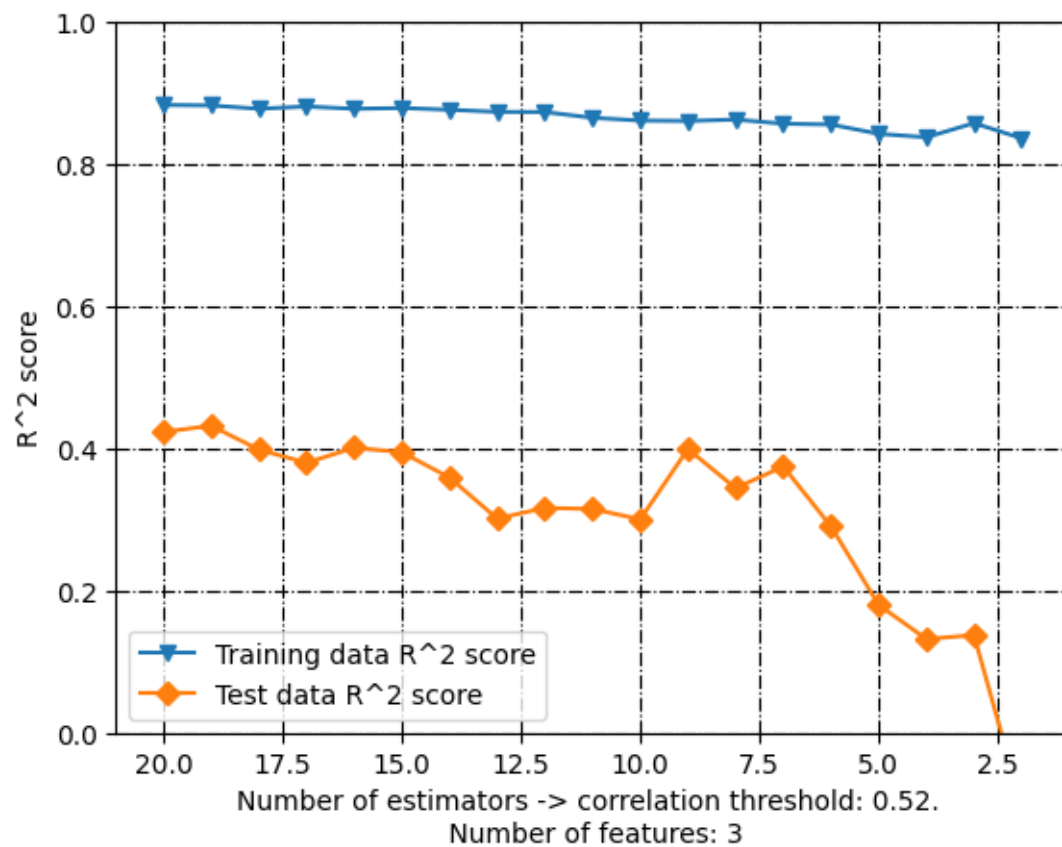



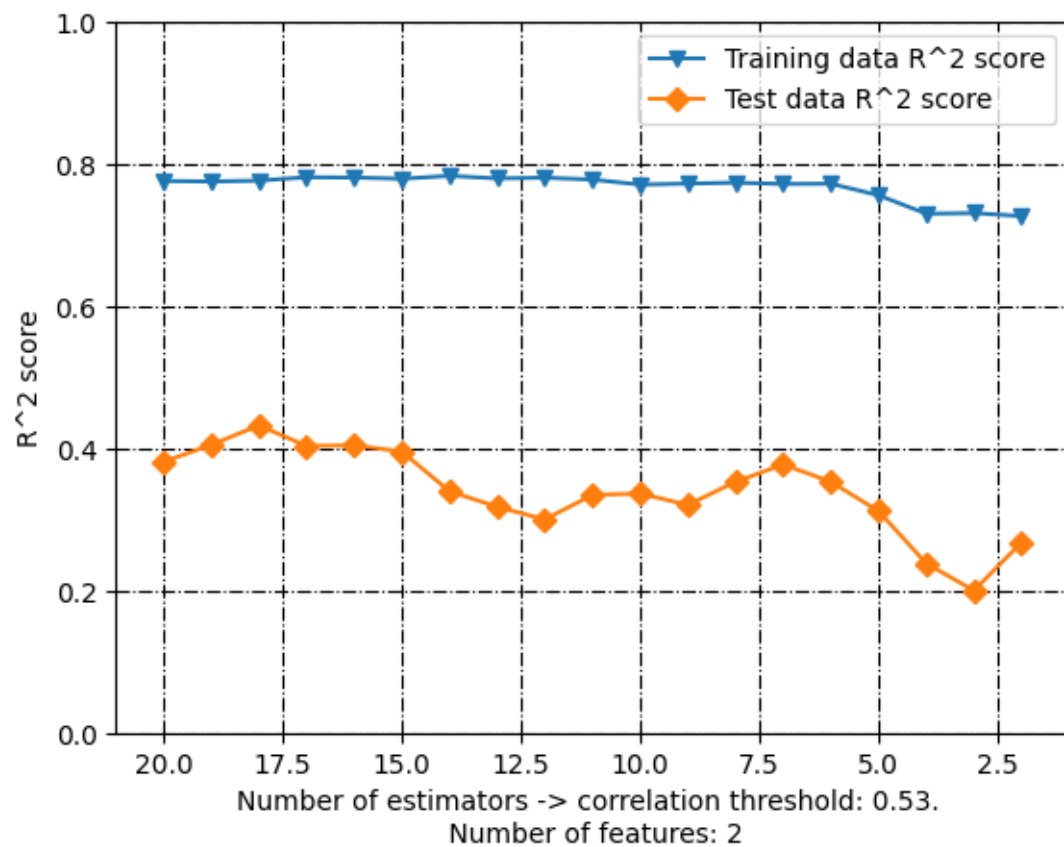

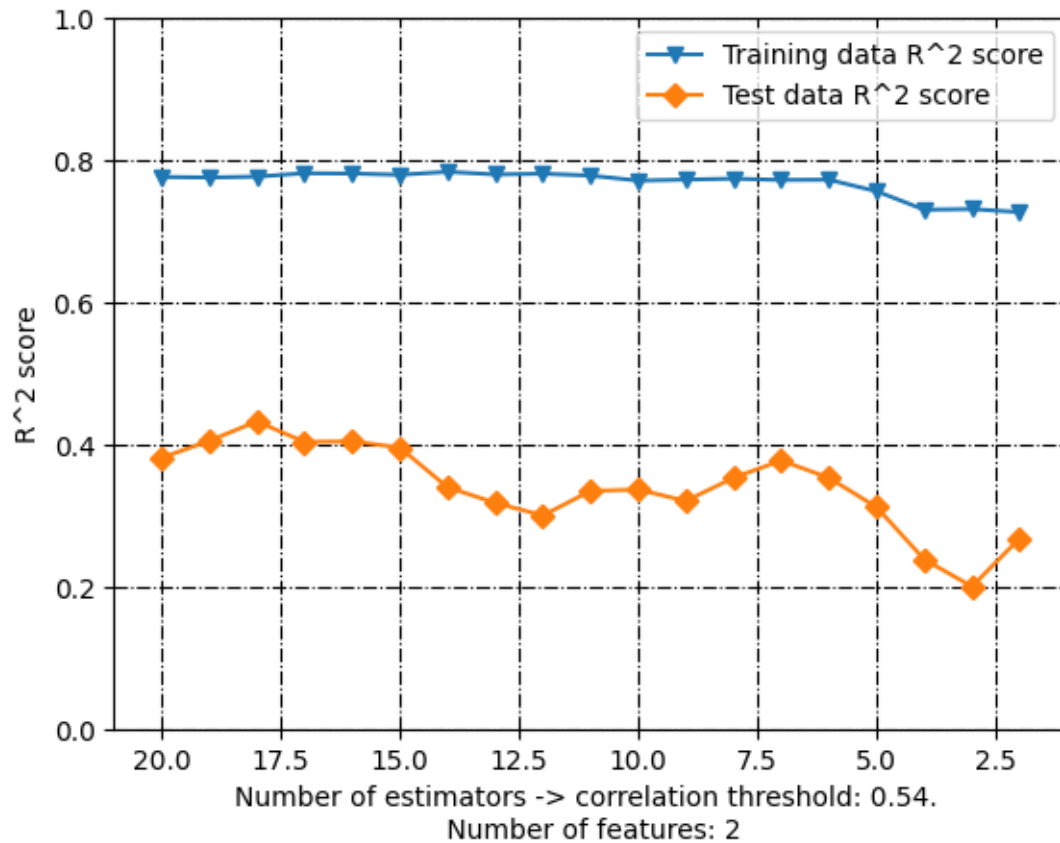

```
[28]: plt.plot(df_without_standardization['Correlation threshold'],  
             df_without_standardization['Number of features'], label = "Number of  
             features", marker='.')  
plt.legend()  
plt.xlabel('Correlation threshold')  
plt.ylabel('Number of features')  
plt.show()
```



[ ]:

## 4 KNeighborsRegressor

```
[29]: without_standardization, train_r2_, test_r2_, hist1, hist2, target_column_name,
      ↪ training_data_RMSE, test_data_RMSE = pred_model.
      ↪ prepare_data_and_create_model(molecular_descriptors_df=data,
      ↪
      ↪         correlation_threshold=0.50,
      ↪
      ↪         standardization=False,
      ↪
      ↪         model_type='KNeighborsRegressor',
      ↪
      ↪         target_column_name = target,
      ↪
      ↪         random_state=random_state,
      ↪
      ↪         train_test_split_=True,
```



verbose=True)



I am not doing standardization...

```
molecular descriptor name
0          AATSOZ
1          AATSOare
2          AATSOd
3          AATSOdv
4          AATSOi
molecular descriptor name  corr_value
0          AATSOZ          -0.027037
1          AATSOare        -0.129823
2          AATSOd           0.042740
3          AATSOdv         -0.120173
4          AATSOi           0.132395
molecular descriptor name  corr_value  absolute correlation value
0          AATSOZ          -0.027037          0.027037
1          AATSOare        -0.129823          0.129823
2          AATSOd           0.042740          0.042740
3          AATSOdv         -0.120173          0.120173
4          AATSOi           0.132395          0.132395
molecular descriptor name  corr_value  absolute correlation value
226          AMID_0        -0.524157          0.524157
505          EState_VSA5   -0.579664          0.579664
791          MDEO-12       -0.558727          0.558727
851          NdssC         -0.506855          0.506855
1091         VSA_EState5    0.503578          0.503578
molecular descriptor name  corr_value  absolute correlation value
226          AMID_0        -0.524157          0.524157
505          EState_VSA5   -0.579664          0.579664
791          MDEO-12       -0.558727          0.558727
851          NdssC         -0.506855          0.506855
1091         VSA_EState5    0.503578          0.503578
The model used is: KNeighbors...
Return the coefficient of determination of the prediction:
-0.3334799528711829
R^2 score: 0.6066454945879838
Correlation coefficient: 0.7788745050314484
Test data - unseen during training:
R^2 score: -0.3334799528711829
Correlation coefficient: nan
[7.83404702 5.70779022 8.23286856 5.70779022 7.79262314 8.04735833
 7.75341538 7.86659248 6.27944443 7.79262314 8.66909539 7.79262314
 7.87257549 8.48829548 8.04735833 7.52101879 7.75341538 6.79834213]
113      7.795880
35       6.254925
101      7.275724
```

```

36      7.017729
100     7.337242
13      8.055517
0       8.187087
114     7.638272
104     8.318759
96      7.769551
40      8.050610
103     8.136677
48      7.853872
39      8.267606
14      7.273273
117     6.167491
21      7.554396
9       6.343902
Name: LoVo, dtype: float64
Training Root Mean Square Error: 0.5886619627612601
Testing Root Mean Square Error: 0.7734185954981734

```

```

[30]: print(target_column_name+str('_transformed'))
      print(hist1[target_column_name].hist())

```

```

LoVo_transformed
AxesSubplot(0.125,0.11;0.775x0.77)

```



```
[31]: with_standardization, train_r2_, test_r2_, hist1, hist2, target_column_name,
      ↪ training_data_RMSE, test_data_RMSE = pred_model.
      ↪ prepare_data_and_create_model(molecular_descriptors_df=data,
      ↪
      ↪         correlation_threshold=0.50,
      ↪
      ↪         standardization=True,
      ↪
      ↪         model_type='KNeighborsRegressor',
      ↪
      ↪         target_column_name = target,
      ↪
      ↪         random_state=random_state,
      ↪
      ↪         train_test_split_=True,
      ↪
      ↪         verbose=True)
```

I am doing standardization...

|      | molecular descriptor name |            |                            |
|------|---------------------------|------------|----------------------------|
| 0    | AATS0Z                    |            |                            |
| 1    | AATS0are                  |            |                            |
| 2    | AATS0d                    |            |                            |
| 3    | AATS0dv                   |            |                            |
| 4    | AATS0i                    |            |                            |
|      | molecular descriptor name | corr_value |                            |
| 0    | AATS0Z                    | -0.027037  |                            |
| 1    | AATS0are                  | -0.129823  |                            |
| 2    | AATS0d                    | 0.042740   |                            |
| 3    | AATS0dv                   | -0.120173  |                            |
| 4    | AATS0i                    | 0.132395   |                            |
|      | molecular descriptor name | corr_value | absolute correlation value |
| 0    | AATS0Z                    | -0.027037  | 0.027037                   |
| 1    | AATS0are                  | -0.129823  | 0.129823                   |
| 2    | AATS0d                    | 0.042740   | 0.042740                   |
| 3    | AATS0dv                   | -0.120173  | 0.120173                   |
| 4    | AATS0i                    | 0.132395   | 0.132395                   |
|      | molecular descriptor name | corr_value | absolute correlation value |
| 226  | AMID_0                    | -0.524157  | 0.524157                   |
| 505  | EState_VSA5               | -0.579664  | 0.579664                   |
| 791  | MDE0-12                   | -0.558727  | 0.558727                   |
| 851  | NdssC                     | -0.506855  | 0.506855                   |
| 1091 | VSA_EState5               | 0.503578   | 0.503578                   |
|      | molecular descriptor name | corr_value | absolute correlation value |
| 226  | AMID_0                    | -0.524157  | 0.524157                   |
| 505  | EState_VSA5               | -0.579664  | 0.579664                   |

|      |             |           |          |
|------|-------------|-----------|----------|
| 791  | MDE0-12     | -0.558727 | 0.558727 |
| 851  | NdssC       | -0.506855 | 0.506855 |
| 1091 | VSA_EState5 | 0.503578  | 0.503578 |

The model used is: KNeighbors...

Return the coefficient of determination of the prediction:

-0.3334799528711829

R<sup>2</sup> score: 0.6066454945879838

Correlation coefficient: 0.7788745050314484

Test data - unseen during training:

R<sup>2</sup> score: -0.3334799528711829

Correlation coefficient: nan

[7.83404702 5.70779022 8.23286856 5.70779022 7.79262314 8.04735833  
7.75341538 7.86659248 6.27944443 7.79262314 8.66909539 7.79262314  
7.87257549 8.48829548 8.04735833 7.52101879 7.75341538 6.79834213]

113 7.795880

35 6.254925

101 7.275724

36 7.017729

100 7.337242

13 8.055517

0 8.187087

114 7.638272

104 8.318759

96 7.769551

40 8.050610

103 8.136677

48 7.853872

39 8.267606

14 7.273273

117 6.167491

21 7.554396

9 6.343902

Name: LoVo, dtype: float64

Training Root Mean Square Error: 0.5886619627612601

Testing Root Mean Square Error: 0.7734185954981734

## 4.1 Search inside correlation space

```
[32]: step = 0.01
initial_step = corr_low
last_step = corr_high
first_list = [x / 100.0 for x in range(int(initial_step*100),
    ↪int(last_step*100), int(step*100))]
second_list = []
third_list = []
fourth_l = []
fifth_l = []
```

```

f_list = []
for i in first_list:
    without_standardization, train_r2, test_r2, _, h_, target_column_name, \
    ↪ training_data_RMSE, test_data_RMSE = pred_model.
    ↪ prepare_data_and_create_model(molecular_descriptors_df = data,

    ↪ correlation_threshold = i,

    ↪ standardization = False,

    ↪ model_type = 'KNeighborsRegressor',

    ↪ target_column_name = target,

    ↪ random_state=random_state,

    ↪ train_test_split_ = True,

    ↪ verbose = False)
    second_list.append(train_r2)
    third_list.append(test_r2)
    fourth_l.append(training_data_RMSE)
    fifth_l.append(test_data_RMSE)
    f_list.append(len(h_))

```

File "C:\Users\aleks\anaconda3\envs\cheminf\_gpu\lib\site-packages\joblib\externals\loky\backend\context.py", line 217, in \_count\_physical\_cores  
raise ValueError(

```

[33]: df_without_standardization = pd.DataFrame(data=first_list, \
    ↪ columns=["Correlation threshold"])
df_without_standardization['Training data R^2 score'] = second_list
df_without_standardization['Test data R^2 score'] = third_list
df_without_standardization['Training RMSE'] = fourth_l
df_without_standardization['Test RMSE'] = fifth_l
df_without_standardization['Number of features'] = f_list

```

```

[34]: df_k_nearest = df_without_standardization.copy()
df_without_standardization

```

```

[34]: Correlation threshold  Training data R^2 score  Test data R^2 score  \
0                0.33          0.576390          0.179466
1                0.34          0.576390          0.179466
2                0.35          0.629945          0.129927
3                0.36          0.629945          0.129927
4                0.37          0.623904          0.124725

```



|    |      |          |           |
|----|------|----------|-----------|
| 5  | 0.38 | 0.614863 | 0.185015  |
| 6  | 0.39 | 0.594616 | 0.072307  |
| 7  | 0.40 | 0.600934 | -0.255977 |
| 8  | 0.41 | 0.600934 | -0.255977 |
| 9  | 0.42 | 0.614689 | -0.036872 |
| 10 | 0.43 | 0.616975 | -0.034882 |
| 11 | 0.44 | 0.616975 | -0.034882 |
| 12 | 0.45 | 0.608333 | 0.005907  |
| 13 | 0.46 | 0.628704 | -0.173299 |
| 14 | 0.47 | 0.613090 | -0.102667 |
| 15 | 0.48 | 0.612998 | -0.285140 |
| 16 | 0.49 | 0.606645 | -0.333480 |
| 17 | 0.50 | 0.606645 | -0.333480 |
| 18 | 0.51 | 0.572722 | -0.264338 |
| 19 | 0.52 | 0.572722 | -0.264338 |
| 20 | 0.53 | 0.544344 | -0.247045 |
| 21 | 0.54 | 0.544344 | -0.247045 |

|    | Training RMSE | Test RMSE | Number of features |
|----|---------------|-----------|--------------------|
| 0  | 0.610882      | 0.606694  | 63                 |
| 1  | 0.610882      | 0.606694  | 57                 |
| 2  | 0.570962      | 0.624740  | 52                 |
| 3  | 0.570962      | 0.624740  | 47                 |
| 4  | 0.575603      | 0.626605  | 39                 |
| 5  | 0.582481      | 0.604639  | 35                 |
| 6  | 0.597595      | 0.645095  | 27                 |
| 7  | 0.592920      | 0.750606  | 22                 |
| 8  | 0.592920      | 0.750606  | 21                 |
| 9  | 0.582612      | 0.681999  | 18                 |
| 10 | 0.580881      | 0.681345  | 17                 |
| 11 | 0.580881      | 0.681345  | 17                 |
| 12 | 0.587398      | 0.667782  | 14                 |
| 13 | 0.571919      | 0.725480  | 10                 |
| 14 | 0.583820      | 0.703305  | 7                  |
| 15 | 0.583890      | 0.759271  | 6                  |
| 16 | 0.588662      | 0.773419  | 5                  |
| 17 | 0.588662      | 0.773419  | 5                  |
| 18 | 0.613521      | 0.753101  | 3                  |
| 19 | 0.613521      | 0.753101  | 3                  |
| 20 | 0.633567      | 0.747933  | 2                  |
| 21 | 0.633567      | 0.747933  | 2                  |

## 4.2 Plots

```
[35]: plt.plot(df_without_standardization['Correlation threshold'],  
             df_without_standardization['Training data R^2 score'], label = "Training_  
             data R^2 score", marker='v')  
plt.plot(df_without_standardization['Correlation threshold'],  
         df_without_standardization['Test data R^2 score'], label = "Test data R^2_  
         score", marker='D')  
plt.legend()  
plt.xlabel('Correlation threshold')  
plt.ylabel('R^2 score')  
plt.ylim([0, 1])  
plt.show()
```

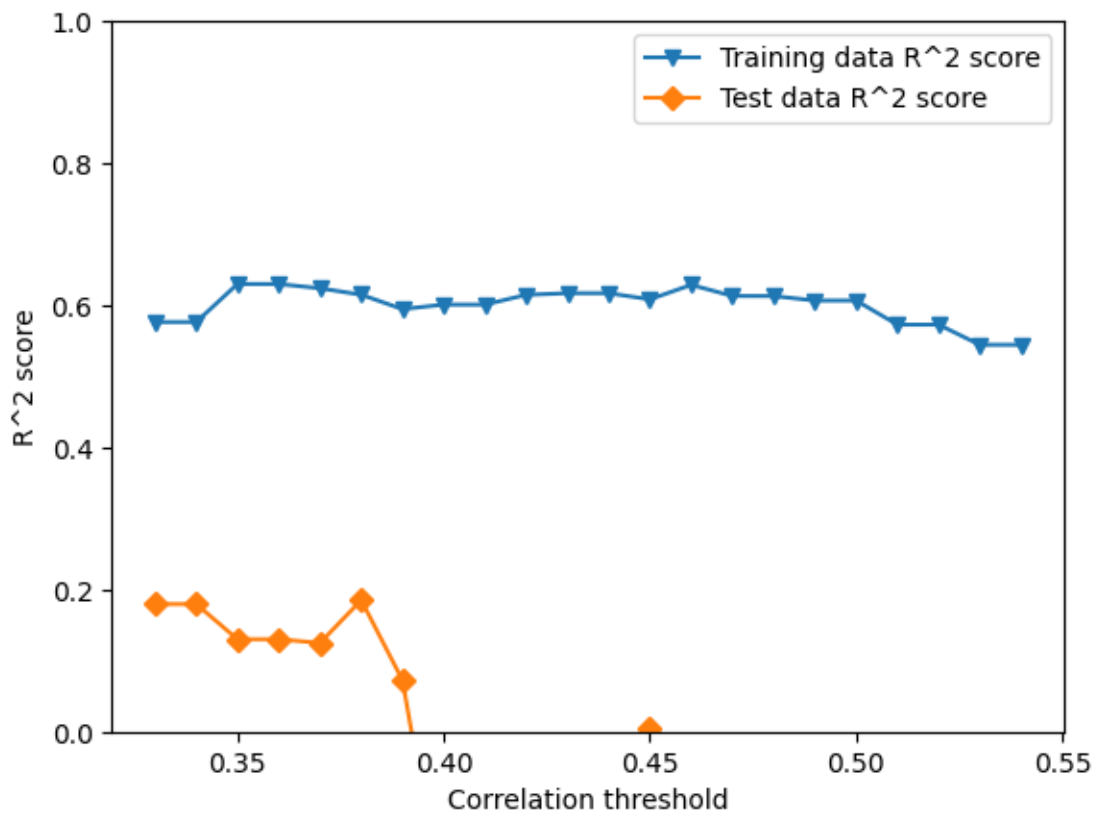

```
[36]: plt.plot(df_without_standardization['Correlation threshold'],  
             df_without_standardization['Number of features'], label = "Number of_  
             features", marker='.')  
plt.legend()  
plt.xlabel('Correlation threshold')  
plt.ylabel('Number of features')  
plt.show()
```



[ ]:

## 5 Support Vector Machines (SVM)

```
[37]: without_standardization, train_r2_, test_r2_, hist1, hist2, target_column_name,
      ↪ training_data_RMSE, test_data_RMSE = pred_model.
      ↪ prepare_data_and_create_model(molecular_descriptors_df=data,
      ↪
      ↪         correlation_threshold=0.50,
      ↪
      ↪         standardization=False,
      ↪
      ↪         model_type='SVR',
      ↪
      ↪         kernel_ = 'linear',
      ↪
      ↪         gamma_ = 'auto',
      ↪
      ↪         target_column_name = target,
```

```

↪          random_state=random_state,
↪          train_test_split_=True,
↪          verbose=True)

```

I am not doing standardization...

|   | molecular descriptor name |  |
|---|---------------------------|--|
| 0 | AATSOZ                    |  |
| 1 | AATSOare                  |  |
| 2 | AATSOd                    |  |
| 3 | AATSOdv                   |  |
| 4 | AATSOi                    |  |

  

|   | molecular descriptor name | corr_value |
|---|---------------------------|------------|
| 0 | AATSOZ                    | -0.027037  |
| 1 | AATSOare                  | -0.129823  |
| 2 | AATSOd                    | 0.042740   |
| 3 | AATSOdv                   | -0.120173  |
| 4 | AATSOi                    | 0.132395   |

  

|   | molecular descriptor name | corr_value | absolute correlation value |
|---|---------------------------|------------|----------------------------|
| 0 | AATSOZ                    | -0.027037  | 0.027037                   |
| 1 | AATSOare                  | -0.129823  | 0.129823                   |
| 2 | AATSOd                    | 0.042740   | 0.042740                   |
| 3 | AATSOdv                   | -0.120173  | 0.120173                   |
| 4 | AATSOi                    | 0.132395   | 0.132395                   |

  

|      | molecular descriptor name | corr_value | absolute correlation value |
|------|---------------------------|------------|----------------------------|
| 226  | AMID_0                    | -0.524157  | 0.524157                   |
| 505  | EState_VSA5               | -0.579664  | 0.579664                   |
| 791  | MDEO-12                   | -0.558727  | 0.558727                   |
| 851  | NdssC                     | -0.506855  | 0.506855                   |
| 1091 | VSA_EState5               | 0.503578   | 0.503578                   |

  

|      | molecular descriptor name | corr_value | absolute correlation value |
|------|---------------------------|------------|----------------------------|
| 226  | AMID_0                    | -0.524157  | 0.524157                   |
| 505  | EState_VSA5               | -0.579664  | 0.579664                   |
| 791  | MDEO-12                   | -0.558727  | 0.558727                   |
| 851  | NdssC                     | -0.506855  | 0.506855                   |
| 1091 | VSA_EState5               | 0.503578   | 0.503578                   |

The model used is: SVR...

Return the coefficient of determination of the prediction:

0.3110687450006334

R<sup>2</sup> score: 0.48759250346101435

Correlation coefficient: 0.698278242150659

Test data - unseen during training:

R<sup>2</sup> score: 0.3110687450006334

Correlation coefficient: 0.5577353718392204

[8.00534204 6.50259618 7.87937287 6.53792643 7.92664356 7.83744649

```

7.97335513 7.98651677 6.94328241 7.90727454 8.20711195 7.91125276
8.17092115 7.71680439 7.83433292 7.30834886 7.98259006 6.67742613]
113    7.795880
35     6.254925
101    7.275724
36     7.017729
100    7.337242
13     8.055517
0      8.187087
114    7.638272
104    8.318759
96     7.769551
40     8.050610
103    8.136677
48     7.853872
39     8.267606
14     7.273273
117    6.167491
21     7.554396
9      6.343902

```

Name: LoVo, dtype: float64

Training Root Mean Square Error: 0.6718644268665568

Testing Root Mean Square Error: 0.5559161720518064

```

[38]: print(target_column_name+str('_transformed'))
      print(hist1[target_column_name].hist())

```

LoVo\_transformed

AxesSubplot(0.125,0.11;0.775x0.77)



```
[39]: with_standardization, train_r2_, test_r2_, hist1, hist2, target_column_name,
      ↪ training_data_RMSE, test_data_RMSE = pred_model.
      ↪ prepare_data_and_create_model(molecular_descriptors_df=data,
      ↪
      ↪         correlation_threshold=0.50,
      ↪
      ↪         standardization=True,
      ↪
      ↪         model_type='SVR',
      ↪
      ↪         kernel_ = 'linear',
      ↪
      ↪         gamma_ = 'auto',
      ↪
      ↪         target_column_name = target,
      ↪
      ↪         random_state=random_state,
      ↪
      ↪         train_test_split_=True,
      ↪
      ↪         verbose=True)
```

I am doing standardization...

molecular descriptor name

|   |          |
|---|----------|
| 0 | AATSOZ   |
| 1 | AATSOare |
| 2 | AATSOd   |
| 3 | AATSOdv  |
| 4 | AATSOi   |

|   | molecular descriptor name | corr_value |
|---|---------------------------|------------|
| 0 | AATSOZ                    | -0.027037  |
| 1 | AATSOare                  | -0.129823  |
| 2 | AATSOd                    | 0.042740   |
| 3 | AATSOdv                   | -0.120173  |
| 4 | AATSOi                    | 0.132395   |

|   | molecular descriptor name | corr_value | absolute correlation value |
|---|---------------------------|------------|----------------------------|
| 0 | AATSOZ                    | -0.027037  | 0.027037                   |
| 1 | AATSOare                  | -0.129823  | 0.129823                   |
| 2 | AATSOd                    | 0.042740   | 0.042740                   |
| 3 | AATSOdv                   | -0.120173  | 0.120173                   |
| 4 | AATSOi                    | 0.132395   | 0.132395                   |

|      | molecular descriptor name | corr_value | absolute correlation value |
|------|---------------------------|------------|----------------------------|
| 226  | AMID_0                    | -0.524157  | 0.524157                   |
| 505  | EState_VSA5               | -0.579664  | 0.579664                   |
| 791  | MDEO-12                   | -0.558727  | 0.558727                   |
| 851  | NdssC                     | -0.506855  | 0.506855                   |
| 1091 | VSA_EState5               | 0.503578   | 0.503578                   |

|      | molecular descriptor name | corr_value | absolute correlation value |
|------|---------------------------|------------|----------------------------|
| 226  | AMID_0                    | -0.524157  | 0.524157                   |
| 505  | EState_VSA5               | -0.579664  | 0.579664                   |
| 791  | MDEO-12                   | -0.558727  | 0.558727                   |
| 851  | NdssC                     | -0.506855  | 0.506855                   |
| 1091 | VSA_EState5               | 0.503578   | 0.503578                   |

The model used is: SVR...

Return the coefficient of determination of the prediction:

0.3110687450006334

R<sup>2</sup> score: 0.48759250346101435

Correlation coefficient: 0.698278242150659

Test data - unseen during training:

R<sup>2</sup> score: 0.3110687450006334

Correlation coefficient: 0.5577353718392204

[8.00534204 6.50259618 7.87937287 6.53792643 7.92664356 7.83744649  
7.97335513 7.98651677 6.94328241 7.90727454 8.20711195 7.91125276  
8.17092115 7.71680439 7.83433292 7.30834886 7.98259006 6.67742613]  
113 7.795880  
35 6.254925  
101 7.275724  
36 7.017729  
100 7.337242  
13 8.055517

```

0      8.187087
114    7.638272
104    8.318759
96     7.769551
40     8.050610
103    8.136677
48     7.853872
39     8.267606
14     7.273273
117    6.167491
21     7.554396
9      6.343902
Name: LoVo, dtype: float64
Training Root Mean Square Error: 0.6718644268665568
Testing Root Mean Square Error: 0.5559161720518064

```

## 5.1 Search inside correlation space

```

[40]: step = 0.01
      initial_step = corr_low
      last_step = corr_high
      first_list = [x / 100.0 for x in range(int(initial_step*100),
      ↪int(last_step*100), int(step*100))]
      second_list = []
      third_list = []
      fourth_l = []
      fifth_l = []
      f_list = []
      for i in first_list:
          without_standardization, train_r2, test_r2, _, h_, target_column_name,
          ↪training_data_RMSE, test_data_RMSE = pred_model.
          ↪prepare_data_and_create_model(molecular_descriptors_df = data,

          ↪
          ↪correlation_threshold = i,

          ↪
          ↪standardization = False,

          ↪
          ↪model_type = 'SVR',

          ↪
          ↪kernel_ = 'linear',

          ↪
          ↪gamma_ = 'auto',

          ↪
          ↪target_column_name = target,

          ↪
          ↪random_state=random_state,

```



```

    ↪          train_test_split_ = True,

    ↪          verbose = False)
second_list.append(train_r2)
third_list.append(test_r2)
fourth_l.append(training_data_RMSE)
fifth_l.append(test_data_RMSE)
f_list.append(len(h_))

```

```

[41]: df_without_standardization = pd.DataFrame(data=first_list,
    ↪columns=["Correlation threshold"])
df_without_standardization['Training data R^2 score'] = second_list
df_without_standardization['Test data R^2 score'] = third_list
df_without_standardization['Training RMSE'] = fourth_l
df_without_standardization['Test RMSE'] = fifth_l
df_without_standardization['Number of features'] = f_list

```

```

[42]: df_svm = df_without_standardization.copy()
df_without_standardization

```

```

[42]:
Correlation threshold  Training data R^2 score  Test data R^2 score \
0                    0.33                    0.732859          -0.295018
1                    0.34                    0.721125          -0.187894
2                    0.35                    0.696024          -0.190945
3                    0.36                    0.693197          -0.113206
4                    0.37                    0.660363           0.226054
5                    0.38                    0.659989           0.254549
6                    0.39                    0.646928           0.322221
7                    0.40                    0.595491           0.156139
8                    0.41                    0.595628           0.155251
9                    0.42                    0.569292           0.339228
10                   0.43                    0.563646           0.355258
11                   0.44                    0.563646           0.355258
12                   0.45                    0.548121           0.269939
13                   0.46                    0.531614           0.148373
14                   0.47                    0.487905           0.313219
15                   0.48                    0.488640           0.314526
16                   0.49                    0.487593           0.311069
17                   0.50                    0.487593           0.311069
18                   0.51                    0.452958           0.380862
19                   0.52                    0.452958           0.380862
20                   0.53                    0.451715           0.384150
21                   0.54                    0.451715           0.384150

Training RMSE  Test RMSE  Number of features
0          0.485115    0.762183              63

```

|    |          |          |    |
|----|----------|----------|----|
| 1  | 0.495654 | 0.729979 | 57 |
| 2  | 0.517480 | 0.730916 | 52 |
| 3  | 0.519881 | 0.706658 | 47 |
| 4  | 0.546992 | 0.589219 | 39 |
| 5  | 0.547294 | 0.578271 | 35 |
| 6  | 0.557706 | 0.551398 | 27 |
| 7  | 0.596950 | 0.615257 | 22 |
| 8  | 0.596849 | 0.615581 | 21 |
| 9  | 0.615978 | 0.544437 | 18 |
| 10 | 0.620003 | 0.537792 | 17 |
| 11 | 0.620003 | 0.537792 | 17 |
| 12 | 0.630936 | 0.572270 | 14 |
| 13 | 0.642356 | 0.618082 | 10 |
| 14 | 0.671660 | 0.555048 | 7  |
| 15 | 0.671177 | 0.554519 | 6  |
| 16 | 0.671864 | 0.555916 | 5  |
| 17 | 0.671864 | 0.555916 | 5  |
| 18 | 0.694199 | 0.527005 | 3  |
| 19 | 0.694199 | 0.527005 | 3  |
| 20 | 0.694988 | 0.525604 | 2  |
| 21 | 0.694988 | 0.525604 | 2  |

## 5.2 Plots

```
[43]: plt.plot(df_without_standardization['Correlation threshold'],
             df_without_standardization['Training data R^2 score'], label = "Training
             data R^2 score", marker='v')
plt.plot(df_without_standardization['Correlation threshold'],
             df_without_standardization['Test data R^2 score'], label = "Test data R^2
             score", marker='D')
plt.legend()
plt.xlabel('Correlation threshold')
plt.ylabel('R^2 score')
plt.ylim([0, 1])
plt.show()
```

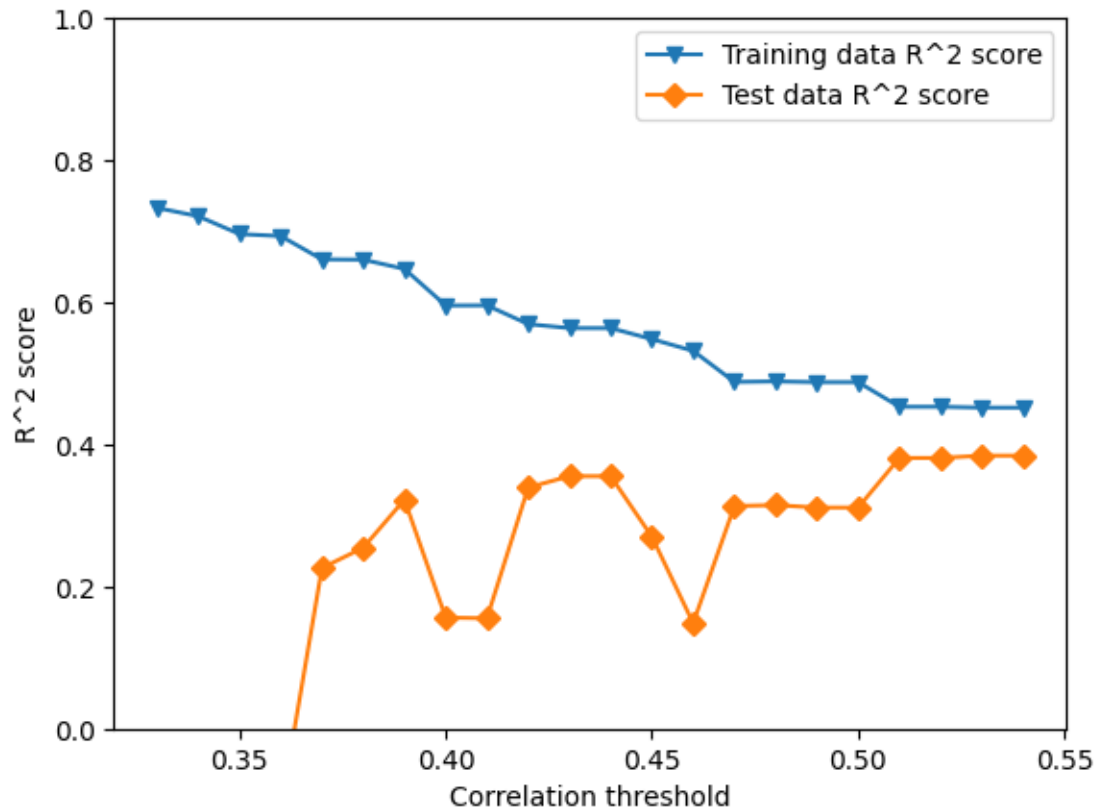

```
[44]: plt.plot(df_without_standardization['Correlation threshold'],  
             df_without_standardization['Number of features'], label = "Number of  
             features", marker='.')  
plt.legend()  
plt.xlabel('Correlation threshold')  
plt.ylabel('Number of features')  
plt.show()
```



### 5.3 Store quality measurements

```
[45]: with pd.ExcelWriter('../Data/Quality_'+str(target)+'_'+str(random_state)+'_'.  
      ↪ 'xlsx') as writer:  
      df_linear.to_excel(writer, sheet_name='MLR')  
      df_decision_tree.to_excel(writer, sheet_name='DT')  
      df_random_forest.to_excel(writer, sheet_name='RF')  
      df_k_nearest.to_excel(writer, sheet_name='KNN')  
      df_svm.to_excel(writer, sheet_name='SVM')
```

# Notebook

January 18, 2024

## 1 File 26

```
[1]: import sys
from pathlib import Path
prediction_mode_path = Path("../module")
sys.path.append(prediction_mode_path.as_posix())
import models_creation as pred_model

import pandas as pd
import numpy as np

from sklearn.metrics import r2_score

import matplotlib.pyplot as plt
from sklearn.tree import plot_tree

from matplotlib import pyplot as plt

import joblib

import warnings
warnings.filterwarnings('ignore')
```

```
[2]: load_prepared_data = pd.read_excel('../Data/Kolchicyna_machine_learning.xlsx')
load_prepared_data = load_prepared_data.drop(columns=['Unnamed: 0'])

target = 'LoVo'

corr_low = 0.33
corr_high = 0.55

random_state = 42
```

```
[3]: load_prepared_data.head()
```

```
[3]:
```

|   | AATSOZ    | AATSOare | AATSOd   | AATSOdv  | AATSOi     | AATSOm    | AATSOp   | \ |
|---|-----------|----------|----------|----------|------------|-----------|----------|---|
| 0 | 25.090909 | 6.046518 | 3.109091 | 6.662626 | 160.775045 | 99.075564 | 1.555512 |   |
| 1 | 24.448276 | 6.008422 | 3.051724 | 6.386973 | 161.021674 | 96.473315 | 1.538471 |   |

|   |           |          |          |          |            |           |          |
|---|-----------|----------|----------|----------|------------|-----------|----------|
| 2 | 23.868852 | 5.974074 | 3.000000 | 6.138434 | 161.244045 | 94.127025 | 1.523105 |
| 3 | 23.868852 | 5.974074 | 3.032787 | 6.171220 | 161.244045 | 94.127025 | 1.523105 |
| 4 | 23.343750 | 5.942945 | 2.953125 | 5.913194 | 161.445569 | 92.000700 | 1.509180 |

|   | AATS0pe  | AATS0s   | AATS0se  | ... | A549_float | MCF-7_float | LoVo_float | \ |
|---|----------|----------|----------|-----|------------|-------------|------------|---|
| 0 | 6.126680 | 3.435416 | 7.629859 | ... | 10.8       | 10.3        | 6.5        |   |
| 1 | 6.088791 | 3.330998 | 7.596891 | ... | 11.6       | 12.0        | 8.5        |   |
| 2 | 6.054630 | 3.236850 | 7.567166 | ... | 10.9       | 12.2        | 8.8        |   |
| 3 | 6.054630 | 3.257798 | 7.567166 | ... | 10.5       | 11.3        | 8.5        |   |
| 4 | 6.023670 | 3.151529 | 7.540228 | ... | 89.5       | 92.7        | 52.8       |   |

|   | LoVo/DX_float | BALB/3T3_float | A549_float_transformed | \ |
|---|---------------|----------------|------------------------|---|
| 0 | 54.9          | 10.2           | 7.966576               |   |
| 1 | 31.1          | 14.3           | 7.935542               |   |
| 2 | 17.9          | 11.7           | 7.962574               |   |
| 3 | 10.2          | 11.0           | 7.978811               |   |
| 4 | 77.8          | 99.4           | 7.048177               |   |

|   | MCF-7_float_transformed | LoVo_float_transformed | LoVo/DX_float_transformed | \ |
|---|-------------------------|------------------------|---------------------------|---|
| 0 | 7.987163                | 8.187087               | 7.260428                  |   |
| 1 | 7.920819                | 8.070581               | 7.507240                  |   |
| 2 | 7.913640                | 8.055517               | 7.747147                  |   |
| 3 | 7.946922                | 8.070581               | 7.991400                  |   |
| 4 | 7.032920                | 7.277366               | 7.109020                  |   |

|   | BALB/3T3_float_transformed |
|---|----------------------------|
| 0 | 7.991400                   |
| 1 | 7.844664                   |
| 2 | 7.931814                   |
| 3 | 7.958607                   |
| 4 | 7.002614                   |

[5 rows x 1221 columns]

```
[4]: data = load_prepared_data[list(load_prepared_data.columns)[0:-10]]
data[target] = load_prepared_data[load_prepared_data.columns[-3]]
data.head()
```

|   | AATS0Z    | AATS0are | AATS0d   | AATS0dv  | AATS0i     | AATS0m    | AATS0p   | \ |
|---|-----------|----------|----------|----------|------------|-----------|----------|---|
| 0 | 25.090909 | 6.046518 | 3.109091 | 6.662626 | 160.775045 | 99.075564 | 1.555512 |   |
| 1 | 24.448276 | 6.008422 | 3.051724 | 6.386973 | 161.021674 | 96.473315 | 1.538471 |   |
| 2 | 23.868852 | 5.974074 | 3.000000 | 6.138434 | 161.244045 | 94.127025 | 1.523105 |   |
| 3 | 23.868852 | 5.974074 | 3.032787 | 6.171220 | 161.244045 | 94.127025 | 1.523105 |   |
| 4 | 23.343750 | 5.942945 | 2.953125 | 5.913194 | 161.445569 | 92.000700 | 1.509180 |   |

|   | AATS0pe  | AATS0s   | AATS0se  | ... | piPC10   | piPC2    | piPC3    | piPC4    | \ |
|---|----------|----------|----------|-----|----------|----------|----------|----------|---|
| 0 | 6.126680 | 3.435416 | 7.629859 | ... | 7.999655 | 4.266195 | 4.915408 | 5.516700 |   |

|   |          |          |          |     |          |          |          |          |
|---|----------|----------|----------|-----|----------|----------|----------|----------|
| 1 | 6.088791 | 3.330998 | 7.596891 | ... | 8.018726 | 4.280132 | 4.922714 | 5.520711 |
| 2 | 6.054630 | 3.236850 | 7.567166 | ... | 8.028799 | 4.293878 | 4.929967 | 5.524706 |
| 3 | 6.054630 | 3.257798 | 7.567166 | ... | 8.037440 | 4.307438 | 4.929967 | 5.524706 |
| 4 | 6.023670 | 3.151529 | 7.540228 | ... | 8.034892 | 4.307438 | 4.937168 | 5.528685 |

|   | piPC5    | piPC6    | piPC7    | piPC8    | piPC9    | LoVo     |
|---|----------|----------|----------|----------|----------|----------|
| 0 | 6.098566 | 6.595759 | 6.979116 | 7.337313 | 7.681445 | 8.187087 |
| 1 | 6.103048 | 6.601209 | 6.985613 | 7.349442 | 7.695531 | 8.070581 |
| 2 | 6.105281 | 6.603923 | 6.989306 | 7.353932 | 7.704023 | 8.055517 |
| 3 | 6.107510 | 6.606629 | 6.992068 | 7.361425 | 7.709420 | 8.070581 |
| 4 | 6.107510 | 6.605277 | 6.991148 | 7.356489 | 7.707175 | 7.277366 |

[5 rows x 1212 columns]

## 2 Multiple Linear regression (MLR)

```
[5]: without_standardization, train_r2_, test_r2_, hist1, hist2, target_column_name,
      ↪ training_data_RMSE, test_data_RMSE = pred_model.
      ↪ prepare_data_and_create_model(molecular_descriptors_df=data,
      ↪
      ↪ correlation_threshold=0.5,
      ↪
      ↪ standardization=False,
      ↪
      ↪ model_type='linear_model',
      ↪
      ↪ target_column_name = str(target),
      ↪
      ↪ random_state=random_state,
      ↪
      ↪ train_test_split_=True,
      ↪
      ↪ verbose=True)
```

I am not doing standardization...

|   | molecular descriptor name | corr_value |
|---|---------------------------|------------|
| 0 | AATS0Z                    | -0.027037  |
| 1 | AATS0are                  | -0.129823  |
| 2 | AATS0d                    | 0.042740   |
| 3 | AATS0dv                   | -0.120173  |

|      |                           |            |                            |
|------|---------------------------|------------|----------------------------|
| 4    | AATSOi                    | 0.132395   |                            |
|      | molecular descriptor name | corr_value | absolute correlation value |
| 0    | AATSOZ                    | -0.027037  | 0.027037                   |
| 1    | AATSOare                  | -0.129823  | 0.129823                   |
| 2    | AATSOd                    | 0.042740   | 0.042740                   |
| 3    | AATSOdv                   | -0.120173  | 0.120173                   |
| 4    | AATSOi                    | 0.132395   | 0.132395                   |
|      | molecular descriptor name | corr_value | absolute correlation value |
| 226  | AMID_0                    | -0.524157  | 0.524157                   |
| 505  | EState_VSA5               | -0.579664  | 0.579664                   |
| 791  | MDEO-12                   | -0.558727  | 0.558727                   |
| 851  | NdssC                     | -0.506855  | 0.506855                   |
| 1091 | VSA_EState5               | 0.503578   | 0.503578                   |
|      | molecular descriptor name | corr_value | absolute correlation value |
| 226  | AMID_0                    | -0.524157  | 0.524157                   |
| 505  | EState_VSA5               | -0.579664  | 0.579664                   |
| 791  | MDEO-12                   | -0.558727  | 0.558727                   |
| 851  | NdssC                     | -0.506855  | 0.506855                   |
| 1091 | VSA_EState5               | 0.503578   | 0.503578                   |

The model used is: LinearReg..

Return the coefficient of determination of the prediction:

0.34262532352099506

R<sup>2</sup> score: 0.5124549074751447

Correlation coefficient: 0.7158595584855626

Test data - unseen during training:

R<sup>2</sup> score: 0.34262532352099506

Correlation coefficient: 0.5853420568530806

[8.25792779 8.2509851 7.61307432 7.26729303 6.09331676 7.79366094  
7.97875067 7.83583733 7.97290693 7.94455467 7.7775089 6.95407307  
7.9643469 6.55467624 7.44264866 8.25966546 7.98082096 7.80836735]

44 8.508638  
47 7.920819  
4 7.277366  
55 7.920819  
26 5.208801  
64 8.327902  
73 7.886057  
10 8.102373  
40 8.050610  
107 8.017729  
18 7.140261  
62 8.657577  
11 8.107905  
36 7.017729  
89 8.638272  
91 10.000000  
109 7.886057  
0 8.187087



Name: LoVo, dtype: float64

Training Root Mean Square Error: 0.6222643149396536

Testing Root Mean Square Error: 0.7462571611515958

```
[6]: print(target_column_name+str('_transformed'))  
      print(hist1[target_column_name].hist())
```

LoVo\_transformed

AxesSubplot(0.125,0.11;0.775x0.77)



```
[7]: with_standardization, train_r2_, test_r2_, hist1, hist2, target_column_name,   
      ↪ training_data_RMSE, test_data_RMSE = pred_model.  
      ↪ prepare_data_and_create_model(molecular_descriptors_df=data,  
  
      ↪ correlation_threshold=0.50,  
  
      ↪ standardization=True,  
  
      ↪ model_type='linear_model',  
  
      ↪ target_column_name = target,
```

```

↪          random_state=random_state,
↪          train_test_split_=True,
↪          verbose=True)

```

I am doing standardization...

| molecular descriptor name |          |
|---------------------------|----------|
| 0                         | AATSOZ   |
| 1                         | AATSOare |
| 2                         | AATSOd   |
| 3                         | AATSOdv  |
| 4                         | AATSOi   |

  

| molecular descriptor name | corr_value         |
|---------------------------|--------------------|
| 0                         | AATSOZ -0.027037   |
| 1                         | AATSOare -0.129823 |
| 2                         | AATSOd 0.042740    |
| 3                         | AATSOdv -0.120173  |
| 4                         | AATSOi 0.132395    |

  

| molecular descriptor name | corr_value         | absolute correlation value |
|---------------------------|--------------------|----------------------------|
| 0                         | AATSOZ -0.027037   | 0.027037                   |
| 1                         | AATSOare -0.129823 | 0.129823                   |
| 2                         | AATSOd 0.042740    | 0.042740                   |
| 3                         | AATSOdv -0.120173  | 0.120173                   |
| 4                         | AATSOi 0.132395    | 0.132395                   |

  

| molecular descriptor name | corr_value            | absolute correlation value |
|---------------------------|-----------------------|----------------------------|
| 226                       | AMID_0 -0.524157      | 0.524157                   |
| 505                       | EState_VSA5 -0.579664 | 0.579664                   |
| 791                       | MDEO-12 -0.558727     | 0.558727                   |
| 851                       | NdssC -0.506855       | 0.506855                   |
| 1091                      | VSA_EState5 0.503578  | 0.503578                   |

  

| molecular descriptor name | corr_value            | absolute correlation value |
|---------------------------|-----------------------|----------------------------|
| 226                       | AMID_0 -0.524157      | 0.524157                   |
| 505                       | EState_VSA5 -0.579664 | 0.579664                   |
| 791                       | MDEO-12 -0.558727     | 0.558727                   |
| 851                       | NdssC -0.506855       | 0.506855                   |
| 1091                      | VSA_EState5 0.503578  | 0.503578                   |

The model used is: LinearReg..

Return the coefficient of determination of the prediction:

0.34262532352099506

R<sup>2</sup> score: 0.5124549074751447

Correlation coefficient: 0.7158595584855626

Test data - unseen during training:

R<sup>2</sup> score: 0.34262532352099506

Correlation coefficient: 0.5853420568530806

[8.25792779 8.2509851 7.61307432 7.26729303 6.09331676 7.79366094

```

7.97875067 7.83583733 7.97290693 7.94455467 7.7775089 6.95407307
7.9643469 6.55467624 7.44264866 8.25966546 7.98082096 7.80836735]
44      8.508638
47      7.920819
4       7.277366
55      7.920819
26      5.208801
64      8.327902
73      7.886057
10      8.102373
40      8.050610
107     8.017729
18      7.140261
62      8.657577
11      8.107905
36      7.017729
89      8.638272
91      10.000000
109     7.886057
0       8.187087
Name: LoVo, dtype: float64
Training Root Mean Square Error: 0.6222643149396536
Testing Root Mean Square Error: 0.7462571611515958

```

## 2.1 Search inside correlation space

```

[8]: step = 0.01
initial_step = corr_low
last_step = corr_high
first_list = [x / 100.0 for x in range(int(initial_step*100),
↳int(last_step*100), int(step*100))]
second_list = []
third_list = []
fourth_l = []
fifth_l = []
f_list = []
for i in first_list:
    without_standardization, train_r2, test_r2, _, h_, target_column_name,
↳training_data_RMSE, test_data_RMSE = pred_model.
↳prepare_data_and_create_model(molecular_descriptors_df = data,

↳
correlation_threshold = i,

↳
standardization = False,

↳
model_type = 'linear_model',

```

```

    ↪          target_column_name = target,
    ↪          random_state=random_state,
    ↪          train_test_split_ = True,
    ↪          verbose = False)
second_list.append(train_r2)
third_list.append(test_r2)
fourth_l.append(training_data_RMSE)
fifth_l.append(test_data_RMSE)
f_list.append(len(h_))

```

```

[9]: df_without_standardization = pd.DataFrame(data=first_list,
    ↪columns=["Correlation threshold"])
df_without_standardization['Training data R^2 score'] = second_list
df_without_standardization['Test data R^2 score'] = third_list
df_without_standardization['Training RMSE'] = fourth_l
df_without_standardization['Test RMSE'] = fifth_l
df_without_standardization['Number of features'] = f_list

```

```

[10]: df_linear = df_without_standardization.copy()
df_without_standardization

```

```

[10]:
Correlation threshold  Training data R^2 score  Test data R^2 score  \
0                    0.33                    0.891403          0.349177
1                    0.34                    0.854779          0.473705
2                    0.35                    0.853467          0.435703
3                    0.36                    0.814316          0.079623
4                    0.37                    0.761190          0.250571
5                    0.38                    0.703439          0.555031
6                    0.39                    0.672921          0.553539
7                    0.40                    0.653598          0.554680
8                    0.41                    0.653597          0.554461
9                    0.42                    0.623426          0.395490
10                   0.43                    0.623143          0.401648
11                   0.44                    0.623143          0.401648
12                   0.45                    0.607865          0.394167
13                   0.46                    0.586099          0.356643
14                   0.47                    0.518802          0.353025
15                   0.48                    0.515240          0.324260
16                   0.49                    0.512455          0.342625
17                   0.50                    0.512455          0.342625
18                   0.51                    0.481620          0.400392
19                   0.52                    0.481620          0.400392
20                   0.53                    0.467784          0.348953

```

21                                      0.54                                      0.467784                                      0.348953

|    | Training RMSE | Test RMSE | Number of features |
|----|---------------|-----------|--------------------|
| 0  | 0.293682      | 0.742529  | 63                 |
| 1  | 0.339612      | 0.667723  | 57                 |
| 2  | 0.341143      | 0.691410  | 52                 |
| 3  | 0.384020      | 0.883009  | 47                 |
| 4  | 0.435506      | 0.796796  | 39                 |
| 5  | 0.485316      | 0.613970  | 35                 |
| 6  | 0.509676      | 0.614998  | 27                 |
| 7  | 0.524515      | 0.614212  | 22                 |
| 8  | 0.524516      | 0.614363  | 21                 |
| 9  | 0.546881      | 0.715622  | 18                 |
| 10 | 0.547086      | 0.711968  | 17                 |
| 11 | 0.547086      | 0.711968  | 17                 |
| 12 | 0.558066      | 0.716405  | 14                 |
| 13 | 0.573344      | 0.738258  | 10                 |
| 14 | 0.618200      | 0.740331  | 7                  |
| 15 | 0.620485      | 0.756610  | 6                  |
| 16 | 0.622264      | 0.746257  | 5                  |
| 17 | 0.622264      | 0.746257  | 5                  |
| 18 | 0.641640      | 0.712715  | 3                  |
| 19 | 0.641640      | 0.712715  | 3                  |
| 20 | 0.650147      | 0.742657  | 2                  |
| 21 | 0.650147      | 0.742657  | 2                  |

[ ]:

## 2.2 Plots

```
[11]: plt.plot(df_without_standardization['Correlation threshold'],
             df_without_standardization['Training data R^2 score'], label = "Training
             data R^2 score", marker='v')
plt.plot(df_without_standardization['Correlation threshold'],
             df_without_standardization['Test data R^2 score'], label = "Test data R^2
             score", marker='D')
plt.legend()
plt.xlabel('Correlation threshold')
plt.ylabel('R^2 score')
plt.ylim([0, 1])
plt.show()
```

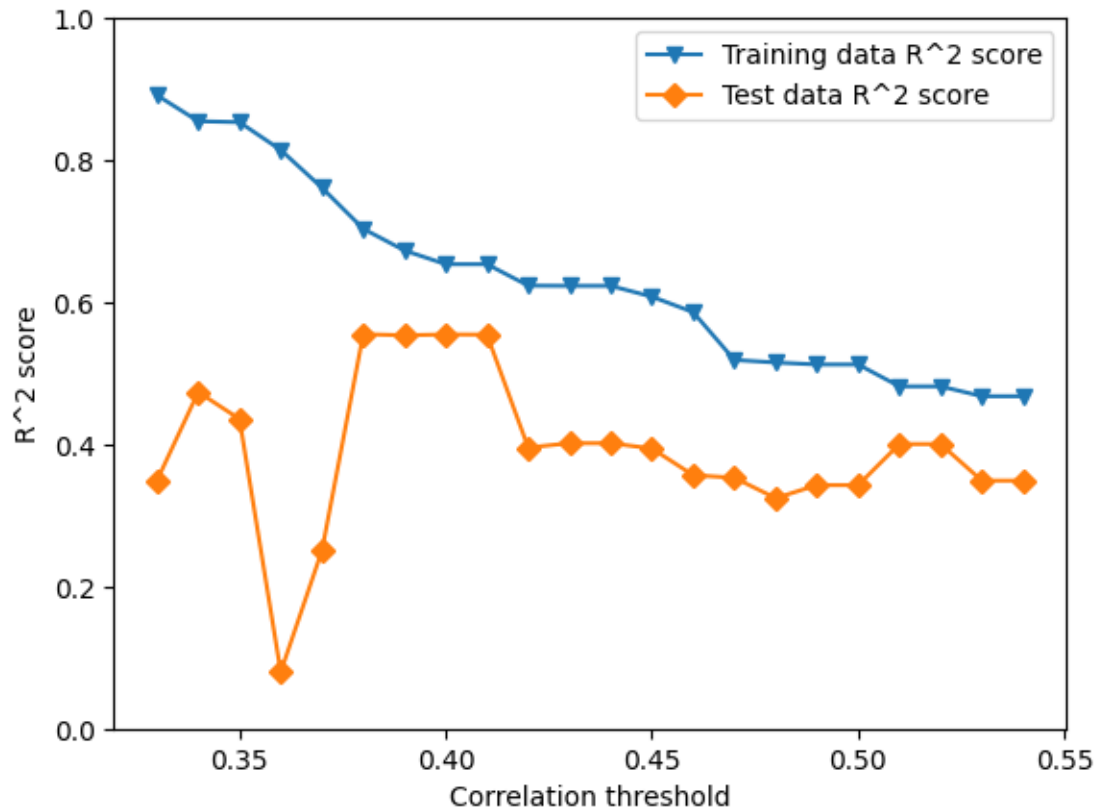

```
[12]: plt.plot(df_without_standardization['Correlation threshold'],  
             df_without_standardization['Number of features'], label = "Number of  
             features", marker='.')  
plt.legend()  
plt.xlabel('Correlation threshold')  
plt.ylabel('Number of features')  
plt.show()
```



[ ]:

## 2.3 Decision Tree

```
[13]: without_standardization, train_r2_, test_r2_, hist1, hist2, target_column_name,
      ↪ training_data_RMSE, test_data_RMSE = pred_model.
      ↪ prepare_data_and_create_model(molecular_descriptors_df=data,
      ↪
      ↪         correlation_threshold=0.50,
      ↪
      ↪         standardization=False,
      ↪
      ↪         model_type='DecisionTreeRegressor',
      ↪
      ↪         max_depth=5,
      ↪
      ↪         target_column_name = target,
      ↪
      ↪         random_state=random_state,
```

```

↪          train_test_split_=True,
↪          verbose=True)

```

I am not doing standardization...

|   | molecular descriptor name |  |  |
|---|---------------------------|--|--|
| 0 | AATSOZ                    |  |  |
| 1 | AATSOare                  |  |  |
| 2 | AATSOd                    |  |  |
| 3 | AATSOdv                   |  |  |
| 4 | AATSOi                    |  |  |

  

|   | molecular descriptor name | corr_value |  |
|---|---------------------------|------------|--|
| 0 | AATSOZ                    | -0.027037  |  |
| 1 | AATSOare                  | -0.129823  |  |
| 2 | AATSOd                    | 0.042740   |  |
| 3 | AATSOdv                   | -0.120173  |  |
| 4 | AATSOi                    | 0.132395   |  |

  

|   | molecular descriptor name | corr_value | absolute correlation value |
|---|---------------------------|------------|----------------------------|
| 0 | AATSOZ                    | -0.027037  | 0.027037                   |
| 1 | AATSOare                  | -0.129823  | 0.129823                   |
| 2 | AATSOd                    | 0.042740   | 0.042740                   |
| 3 | AATSOdv                   | -0.120173  | 0.120173                   |
| 4 | AATSOi                    | 0.132395   | 0.132395                   |

  

|      | molecular descriptor name | corr_value | absolute correlation value |
|------|---------------------------|------------|----------------------------|
| 226  | AMID_0                    | -0.524157  | 0.524157                   |
| 505  | EState_VSA5               | -0.579664  | 0.579664                   |
| 791  | MDEO-12                   | -0.558727  | 0.558727                   |
| 851  | NdssC                     | -0.506855  | 0.506855                   |
| 1091 | VSA_EState5               | 0.503578   | 0.503578                   |

  

|      | molecular descriptor name | corr_value | absolute correlation value |
|------|---------------------------|------------|----------------------------|
| 226  | AMID_0                    | -0.524157  | 0.524157                   |
| 505  | EState_VSA5               | -0.579664  | 0.579664                   |
| 791  | MDEO-12                   | -0.558727  | 0.558727                   |
| 851  | NdssC                     | -0.506855  | 0.506855                   |
| 1091 | VSA_EState5               | 0.503578   | 0.503578                   |

The model used is: DecisionTree...

Return the coefficient of determination of the prediction:

0.16887026297895746

R<sup>2</sup> score: 0.8262751673389552

Correlation coefficient: 0.9089967917099352

Test data - unseen during training:

R<sup>2</sup> score: 0.16887026297895746

Correlation coefficient: 0.4109382714945853

[7.59570161 8.31317281 7.4413779 6.47839279 5.84400658 7.78096821  
7.78096821 7.95190315 8.31317281 8.31317281 6.16749109 7.67778071  
7.95190315 6.47839279 7.97010949 7.59570161 8.31317281 7.95190315]  
44 8.508638



```
47      7.920819
4       7.277366
55      7.920819
26      5.208801
64      8.327902
73      7.886057
10      8.102373
40      8.050610
107     8.017729
18      7.140261
62      8.657577
11      8.107905
36      7.017729
89      8.638272
91      10.000000
109     7.886057
0       8.187087
```

Name: LoVo, dtype: float64

Training Root Mean Square Error: 0.3714483662429523

Testing Root Mean Square Error: 0.839105247916584

```
[14]: print(target_column_name+str('_transformed'))
      print(hist1[target_column_name].hist())
```

LoVo\_transformed

AxesSubplot(0.125,0.11;0.775x0.77)



```
[15]: with_standardization, train_r2_, test_r2_, hist1, hist2, target_column_name,
      ↪ training_data_RMSE, test_data_RMSE = pred_model.
      ↪ prepare_data_and_create_model(molecular_descriptors_df=data,
      ↪
      ↪         correlation_threshold=0.50,
      ↪
      ↪         standardization=True,
      ↪
      ↪         model_type='DecisionTreeRegressor',
      ↪
      ↪         max_depth=5,
      ↪
      ↪         target_column_name = target,
      ↪
      ↪         random_state=random_state,
      ↪
      ↪         train_test_split_=True,
      ↪
      ↪         verbose=True)
```

I am doing standardization...  
molecular descriptor name

|                                                                 |             |           |          |
|-----------------------------------------------------------------|-------------|-----------|----------|
| 0                                                               | AATSOZ      |           |          |
| 1                                                               | AATSOare    |           |          |
| 2                                                               | AATSOd      |           |          |
| 3                                                               | AATSOdv     |           |          |
| 4                                                               | AATSOi      |           |          |
| molecular descriptor name corr_value                            |             |           |          |
| 0                                                               | AATSOZ      | -0.027037 |          |
| 1                                                               | AATSOare    | -0.129823 |          |
| 2                                                               | AATSOd      | 0.042740  |          |
| 3                                                               | AATSOdv     | -0.120173 |          |
| 4                                                               | AATSOi      | 0.132395  |          |
| molecular descriptor name corr_value absolute correlation value |             |           |          |
| 0                                                               | AATSOZ      | -0.027037 | 0.027037 |
| 1                                                               | AATSOare    | -0.129823 | 0.129823 |
| 2                                                               | AATSOd      | 0.042740  | 0.042740 |
| 3                                                               | AATSOdv     | -0.120173 | 0.120173 |
| 4                                                               | AATSOi      | 0.132395  | 0.132395 |
| molecular descriptor name corr_value absolute correlation value |             |           |          |
| 226                                                             | AMID_0      | -0.524157 | 0.524157 |
| 505                                                             | EState_VSA5 | -0.579664 | 0.579664 |
| 791                                                             | MDEO-12     | -0.558727 | 0.558727 |
| 851                                                             | NdssC       | -0.506855 | 0.506855 |
| 1091                                                            | VSA_EState5 | 0.503578  | 0.503578 |
| molecular descriptor name corr_value absolute correlation value |             |           |          |
| 226                                                             | AMID_0      | -0.524157 | 0.524157 |
| 505                                                             | EState_VSA5 | -0.579664 | 0.579664 |
| 791                                                             | MDEO-12     | -0.558727 | 0.558727 |
| 851                                                             | NdssC       | -0.506855 | 0.506855 |
| 1091                                                            | VSA_EState5 | 0.503578  | 0.503578 |

The model used is: DecisionTree...

Return the coefficient of determination of the prediction:

0.16887026297895746

R<sup>2</sup> score: 0.8262751673389552

Correlation coefficient: 0.9089967917099352

Test data - unseen during training:

R<sup>2</sup> score: 0.16887026297895746

Correlation coefficient: 0.4109382714945853

[7.59570161 8.31317281 7.4413779 6.47839279 5.84400658 7.78096821  
7.78096821 7.95190315 8.31317281 8.31317281 6.16749109 7.67778071  
7.95190315 6.47839279 7.97010949 7.59570161 8.31317281 7.95190315]

44 8.508638

47 7.920819

4 7.277366

55 7.920819

26 5.208801

64 8.327902

73 7.886057

10 8.102373

```

40      8.050610
107     8.017729
18      7.140261
62      8.657577
11      8.107905
36      7.017729
89      8.638272
91      10.000000
109     7.886057
0       8.187087

```

Name: LoVo, dtype: float64

Training Root Mean Square Error: 0.3714483662429523

Testing Root Mean Square Error: 0.839105247916584

## 2.4 Search inside correlation space

```

[16]: step = 0.01
      initial_step = corr_low
      last_step = corr_high
      first_list = [x / 100.0 for x in range(int(initial_step*100),
      ↪int(last_step*100), int(step*100))]
      max_depth = [range(2, 30, 1)]
      corr_th = []
      second_list = []
      third_list = []
      fourth_l = []
      fifth_l = []
      f_list = []
      fif_list = []
      for i in first_list:
          for depth in max_depth[0]:

              without_standardization, train_r2, test_r2, _, h_, target_column_name,
              ↪training_data_RMSE, test_data_RMSE = pred_model.
              ↪prepare_data_and_create_model(molecular_descriptors_df=data,

              ↪correlation_threshold=i,

              ↪standardization=False,

              ↪model_type='DecisionTreeRegressor',

              ↪max_depth=depth,

              ↪target_column_name = target,

              ↪random_state=random_state,

```

```

↪          train_test_split_=True,
↪          verbose=False)
    corr_th.append(i)
    second_list.append(train_r2)
    third_list.append(test_r2)
    fourth_l.append(training_data_RMSE)
    fifth_l.append(test_data_RMSE)
    f_list.append(len(h_))
    fif_list.append(depth)

```

```

[17]: df_without_standardization = pd.DataFrame(data=corr_th, columns=["Correlation_
↪threshold"])
df_without_standardization['Training data R^2 score'] = second_list
df_without_standardization['Test data R^2 score'] = third_list
df_without_standardization['Training RMSE'] = fourth_l
df_without_standardization['Test RMSE'] = fifth_l
df_without_standardization['Number of features'] = f_list
df_without_standardization['Depth number'] = fif_list

```

```

[18]: df_decision_tree = df_without_standardization.copy()
#df_without_standardization.to_excel('../Data/
↪A549_Decision_tree_rs_'+str(random_state)+'.xlsx')

```

## 2.5 Plots

```
[19]: corre_list = [x / 100.0 for x in range(int(initial_step*100),
    ↪int(last_step*100), int(0.01*100))]
for element in corre_list:
    element_ =
    ↪df_without_standardization[df_without_standardization['Correlation_
    ↪threshold'] == float(element)]
    plt.plot(element_['Depth number'], element_['Training data R^2 score'],
    ↪label = "Training data R^2 score", marker='v')
    plt.plot(element_['Depth number'], element_['Test data R^2 score'], label =
    ↪"Test data R^2 score", marker='D')
    plt.legend()
    plt.xlabel('Depth number -> correlation threshold: '+str(element)+'.\n
    ↪Number of features: '+str(element_['Number of features'].iloc[0]),
    ↪fontweight='bold')
    plt.xlim(max(element_['Depth number'])+1, min(element_['Depth number'])-1)
    plt.ylabel('R^2 score')
    plt.ylim([0, 1])
    plt.rc('grid', linestyle="-.", color='black')
    plt.grid(True)
    plt.show()
```

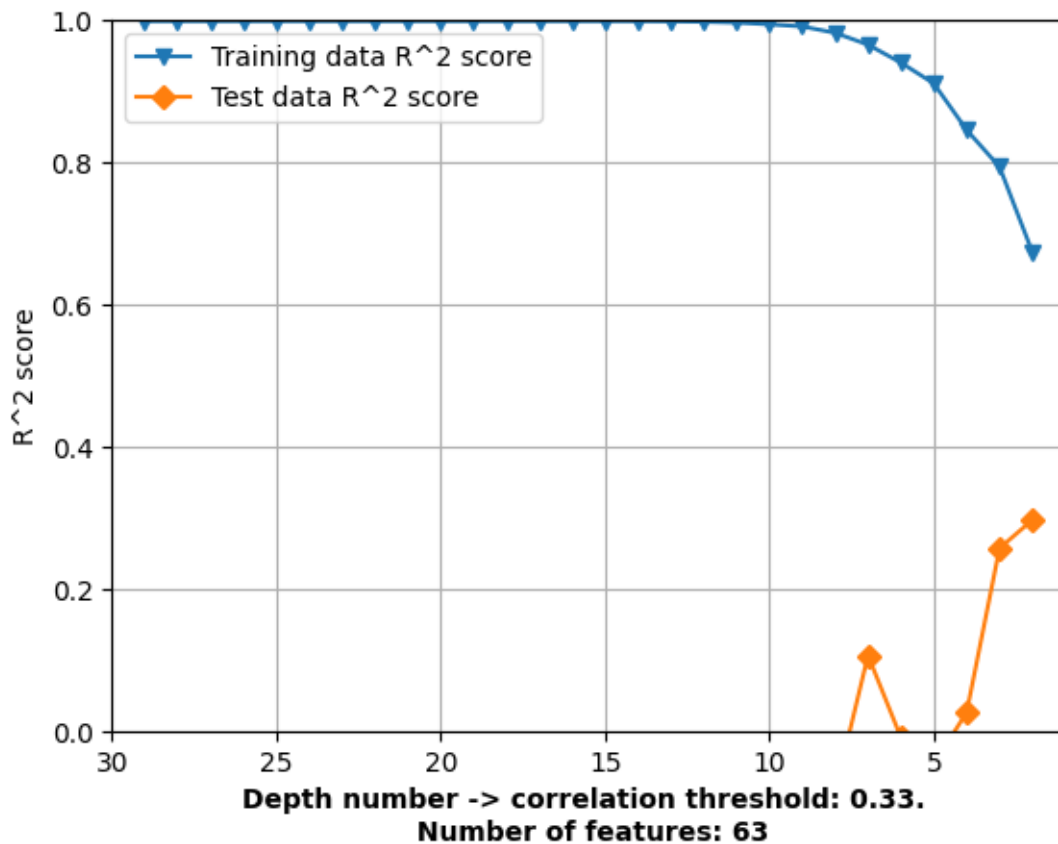

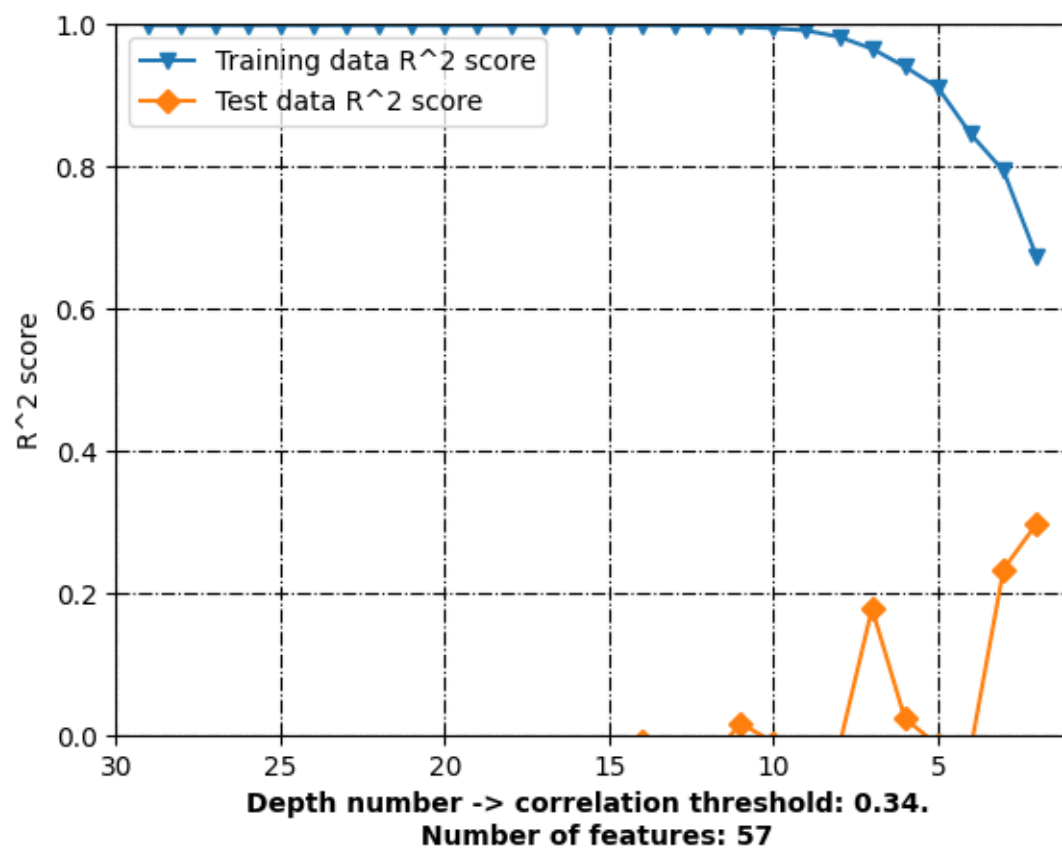

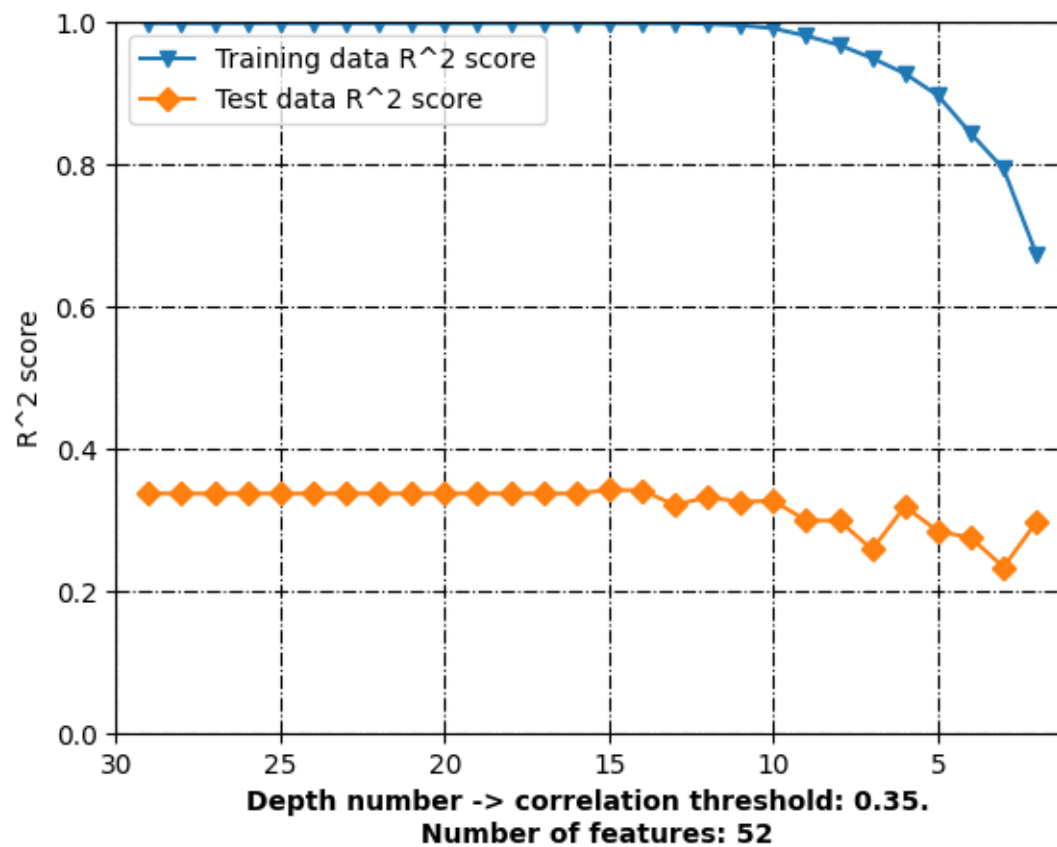



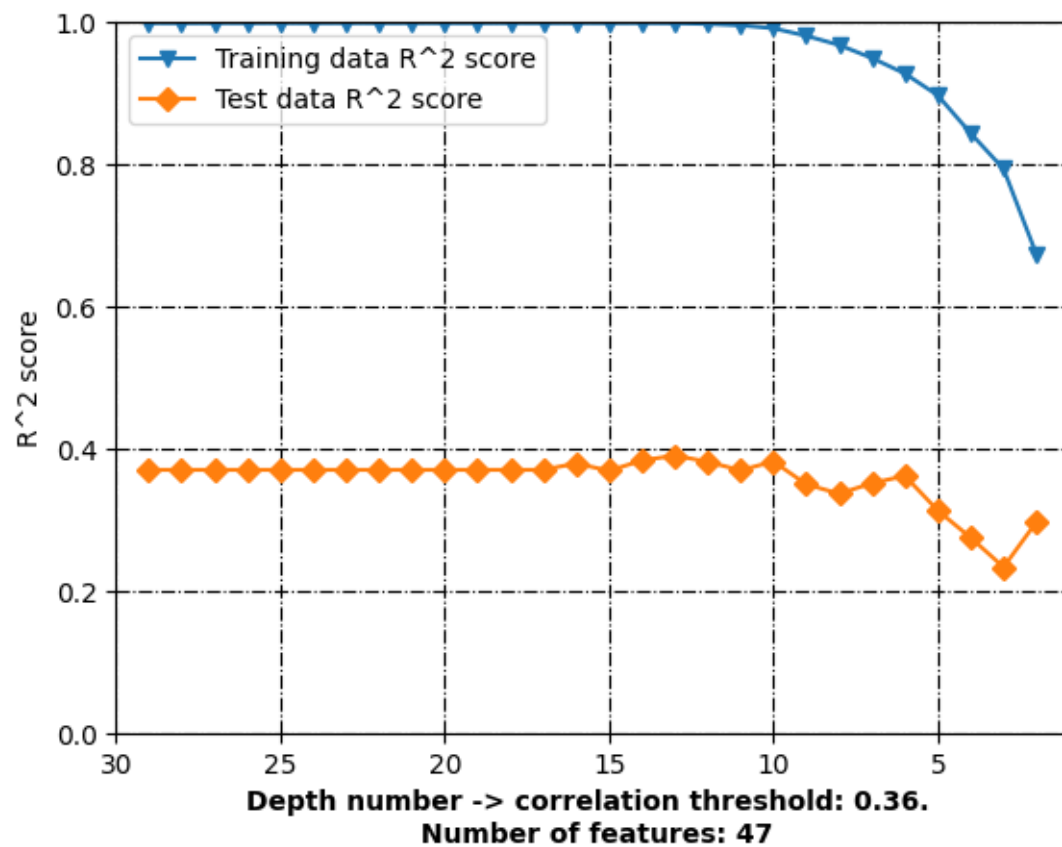

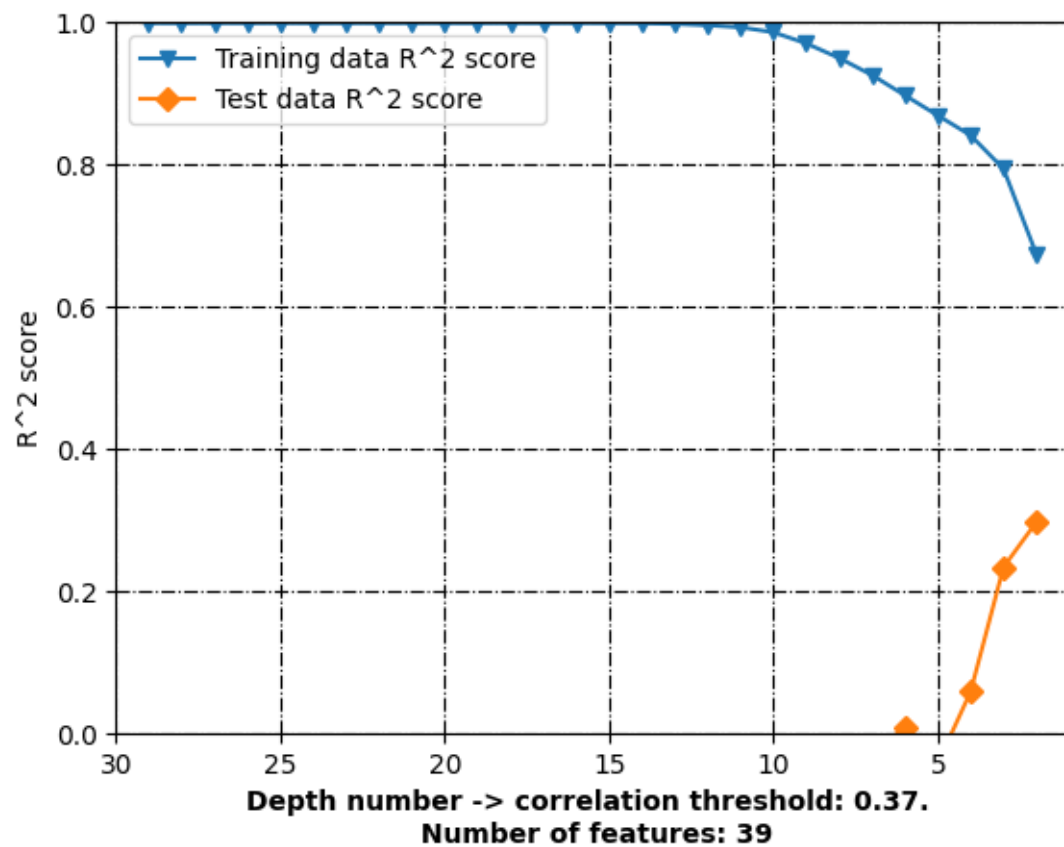

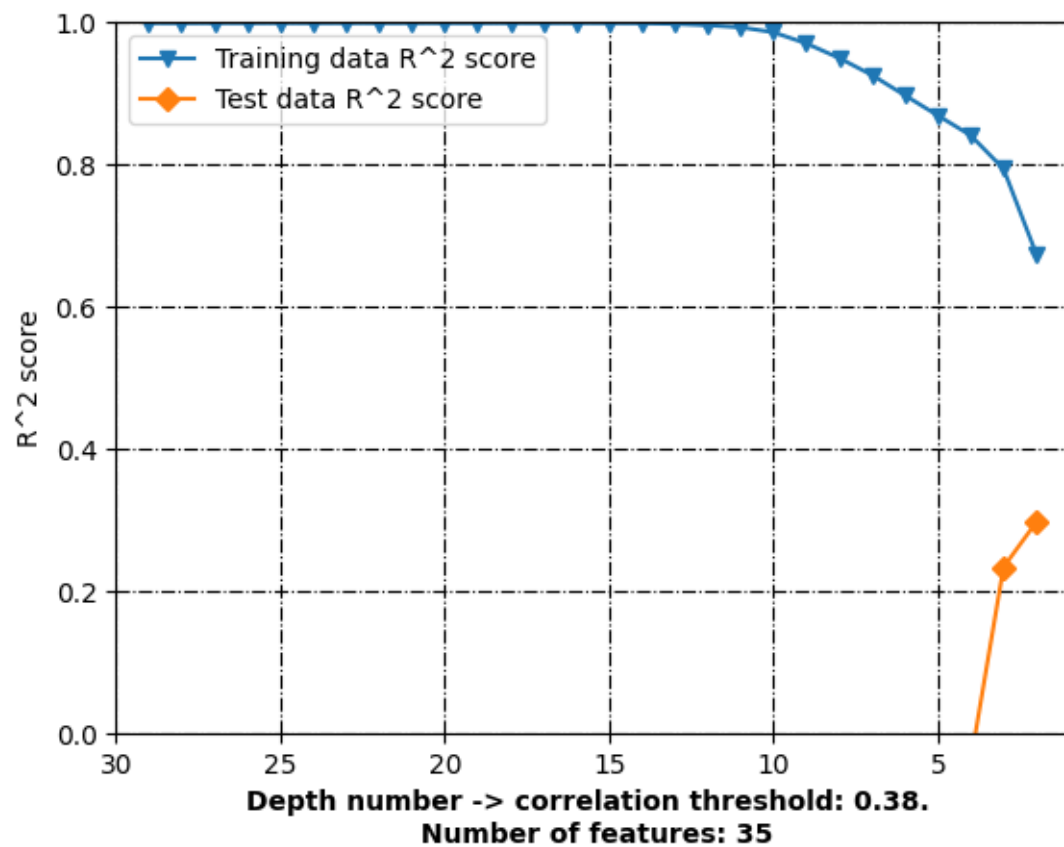

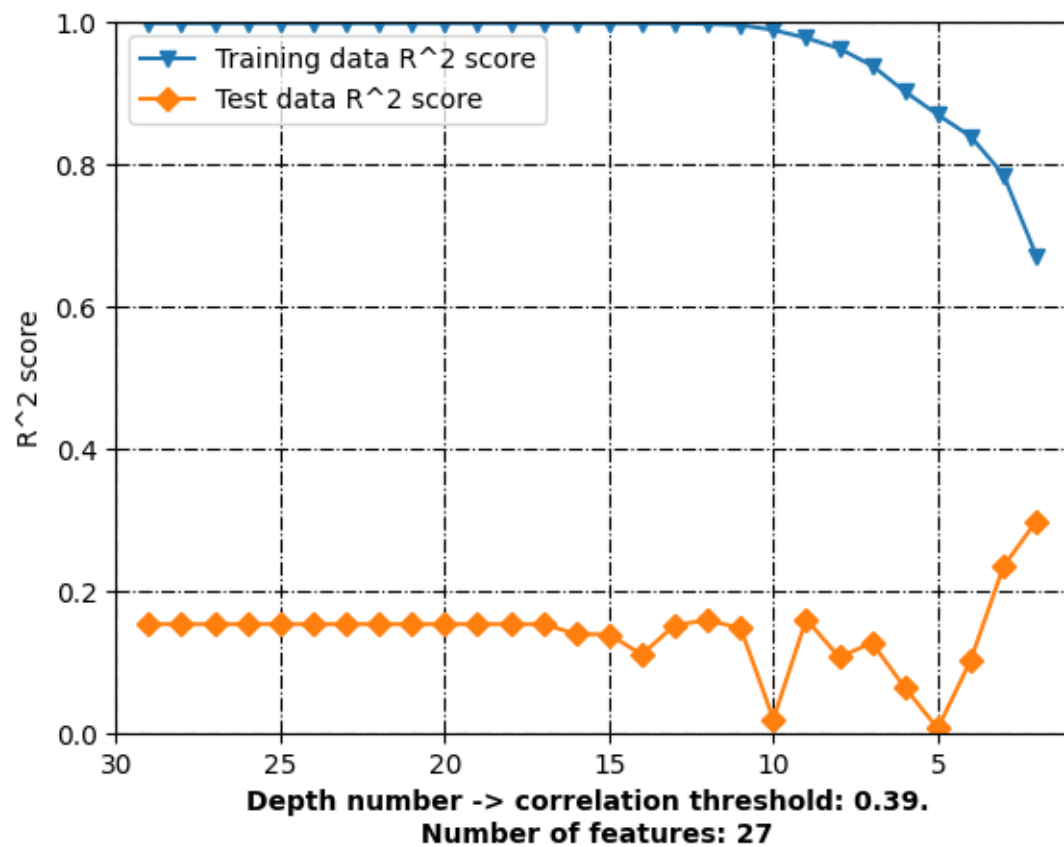

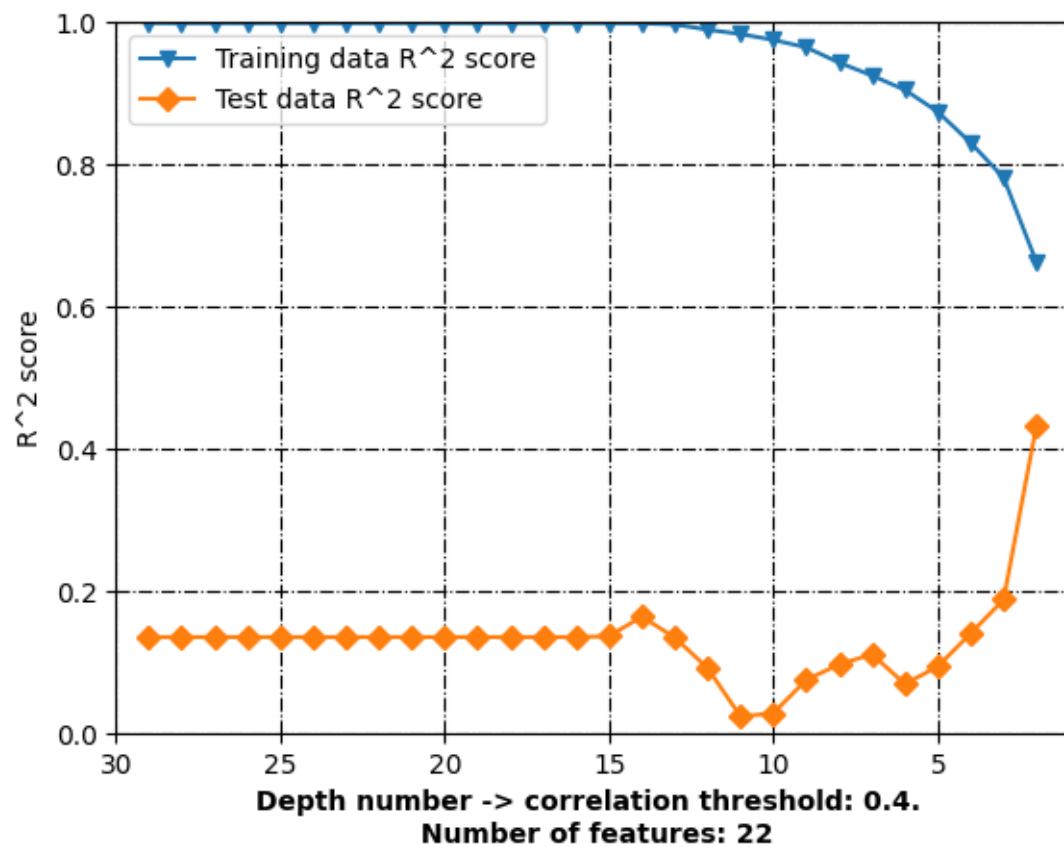

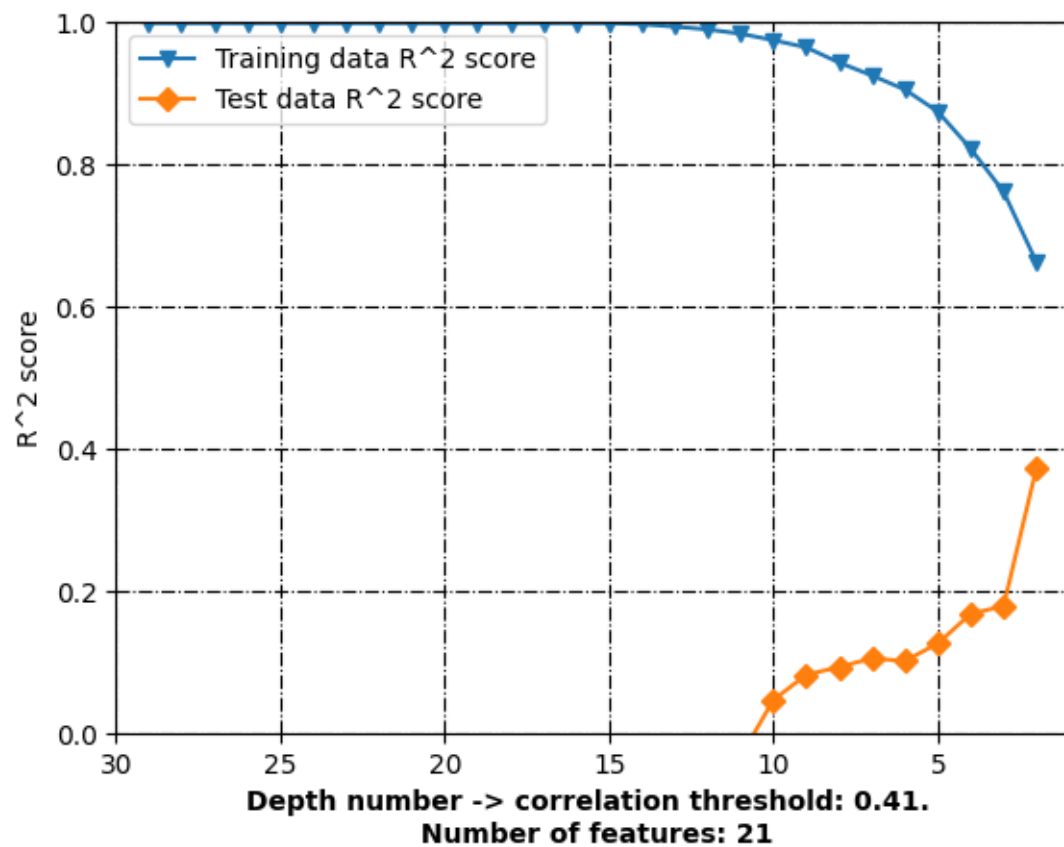

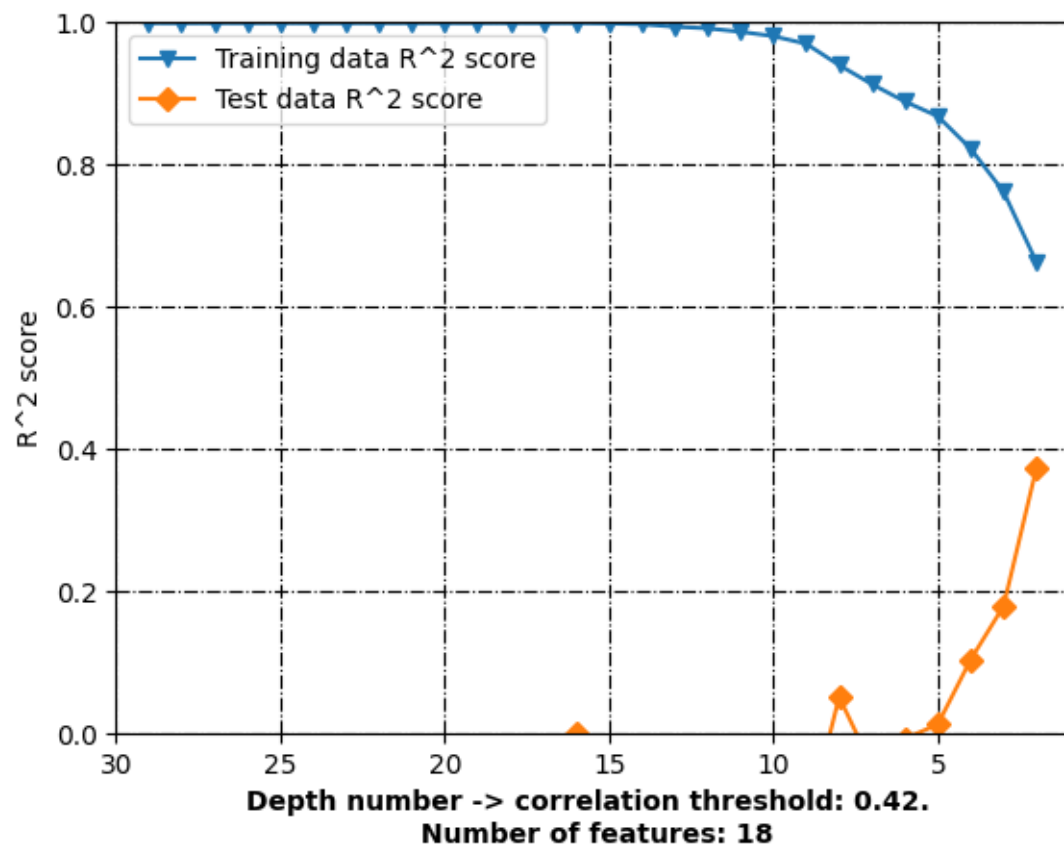

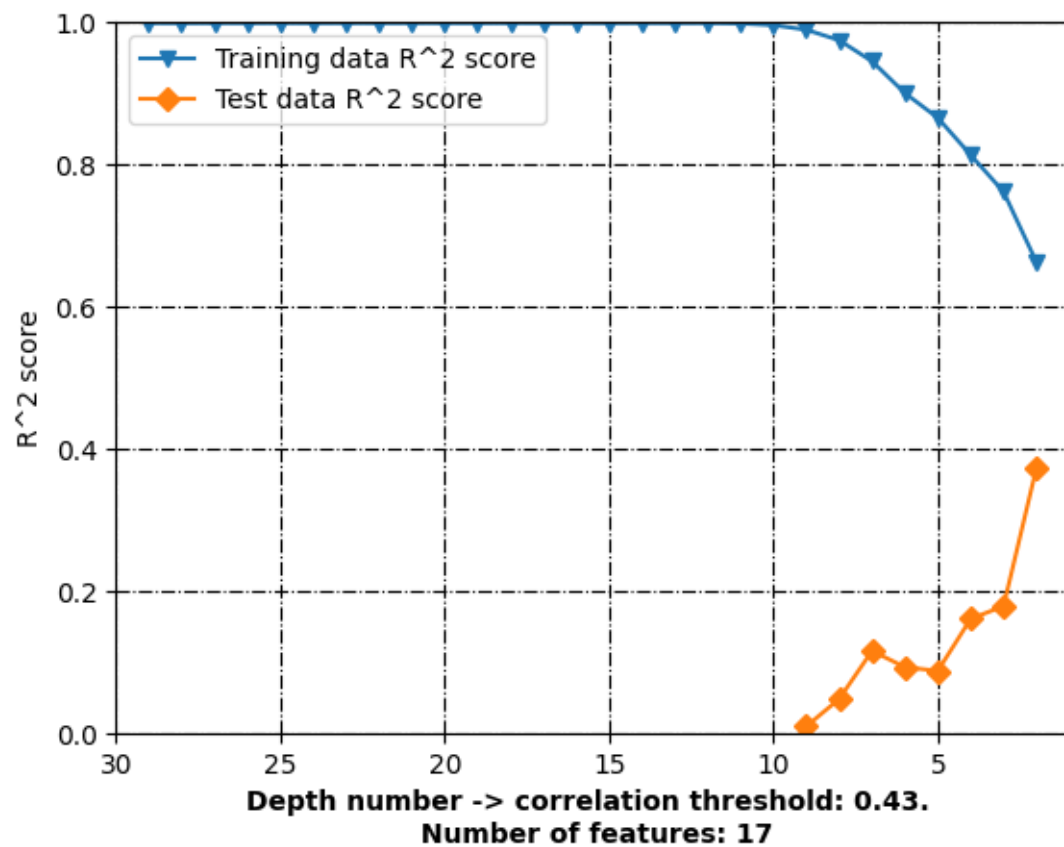



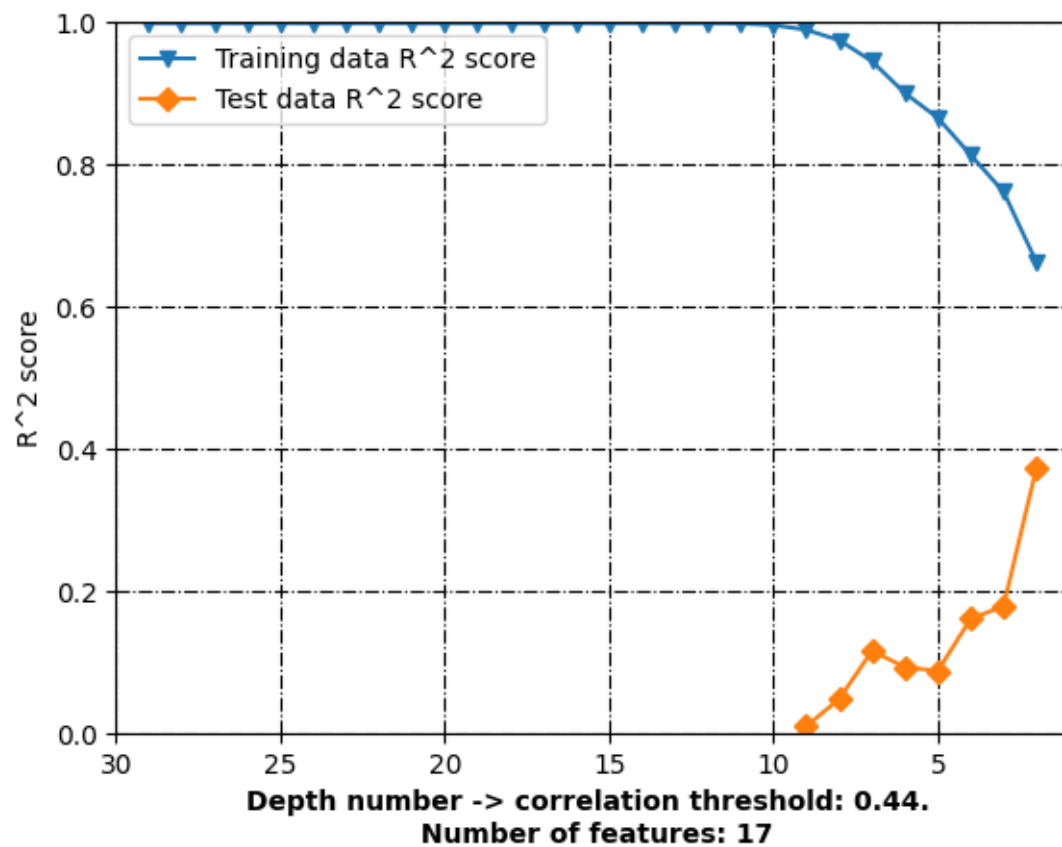

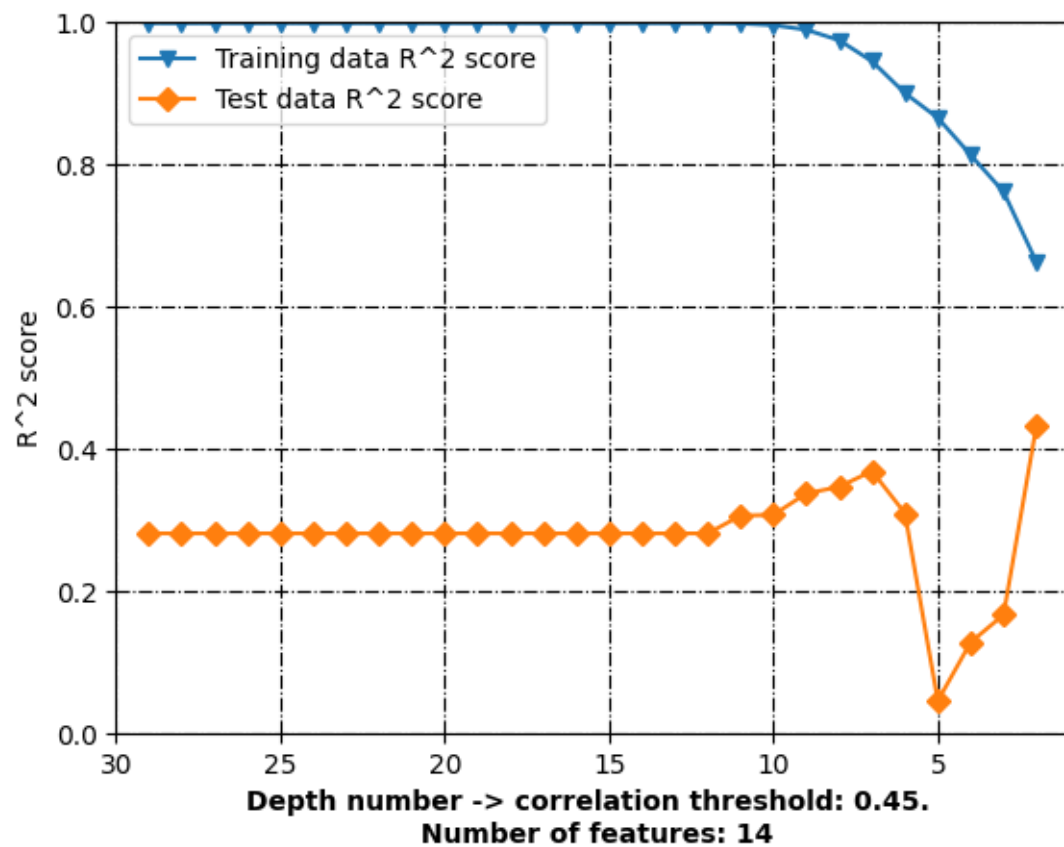

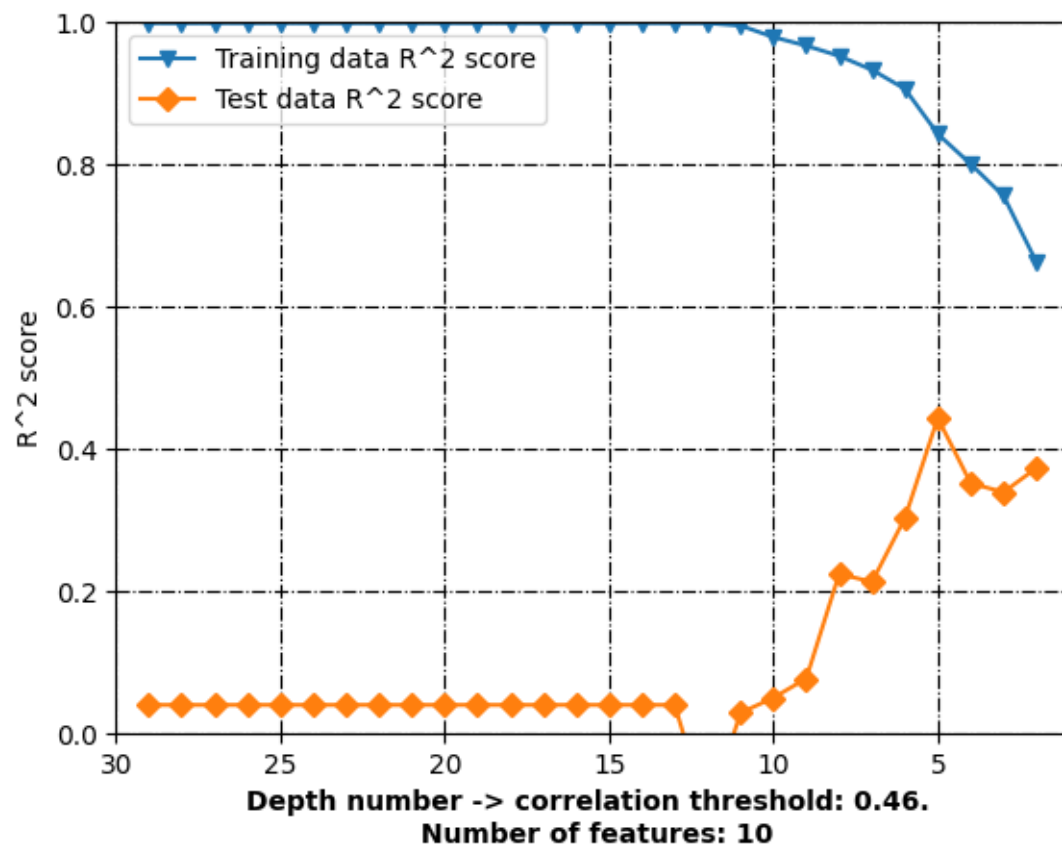

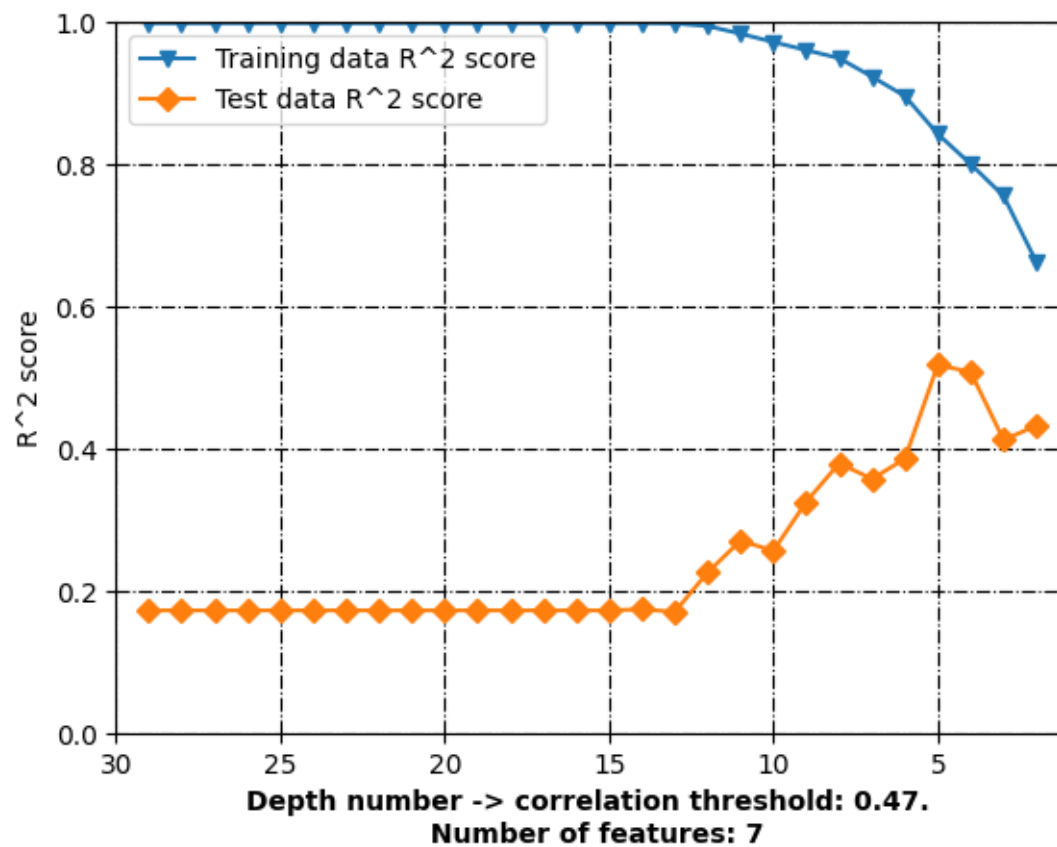

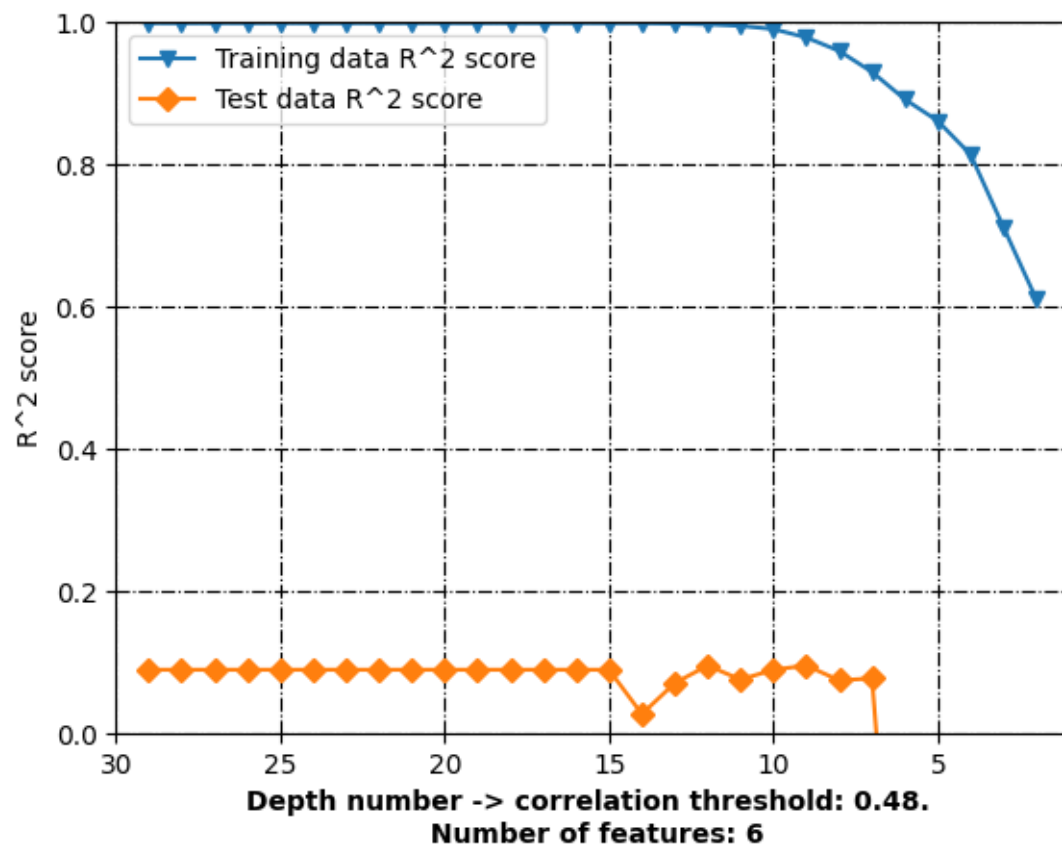

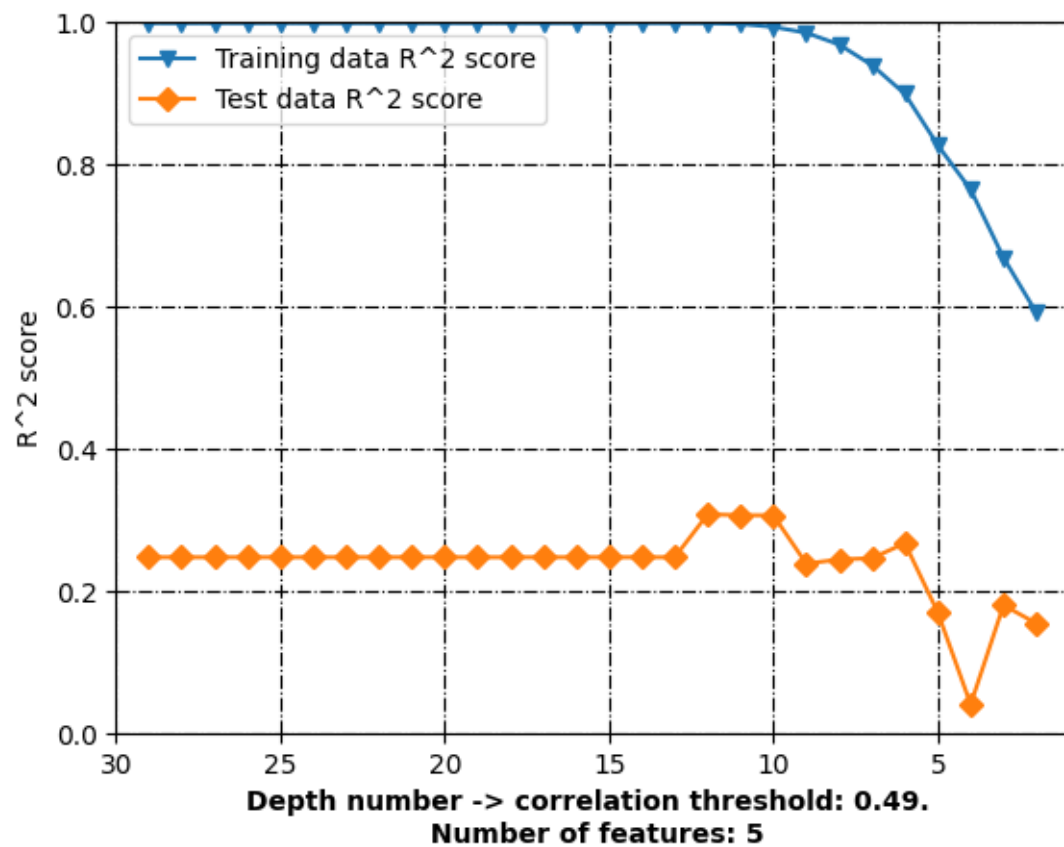

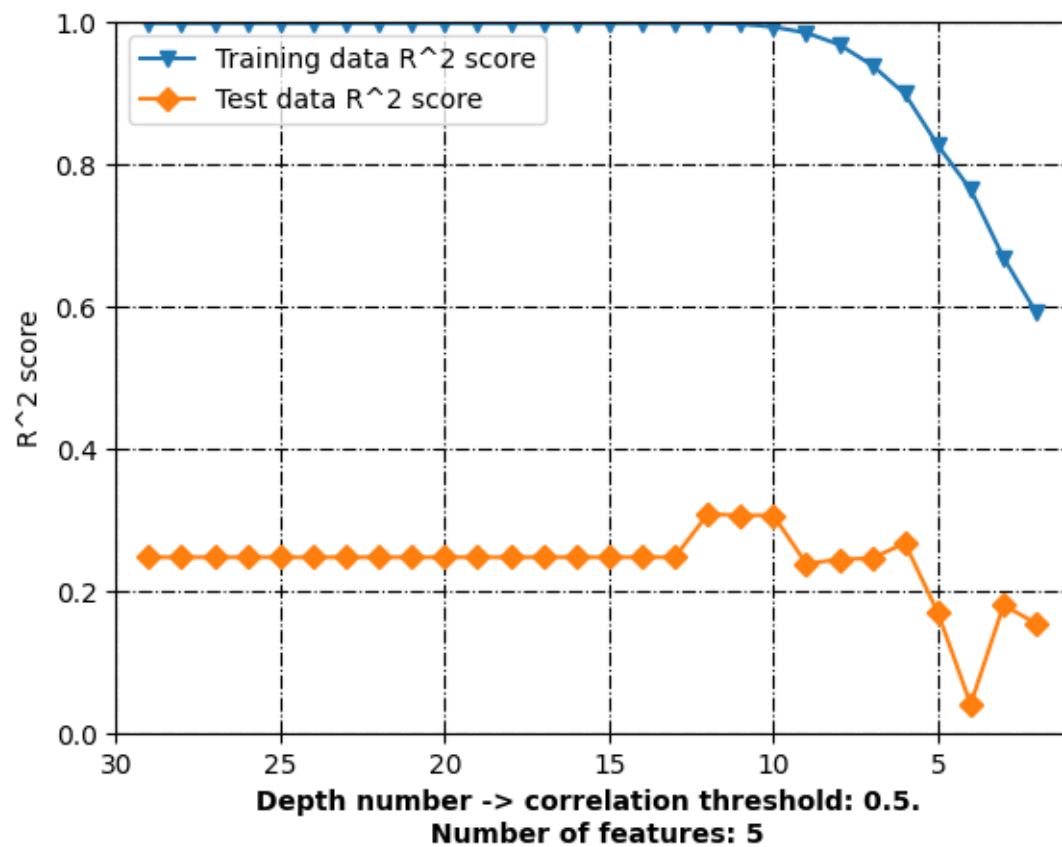

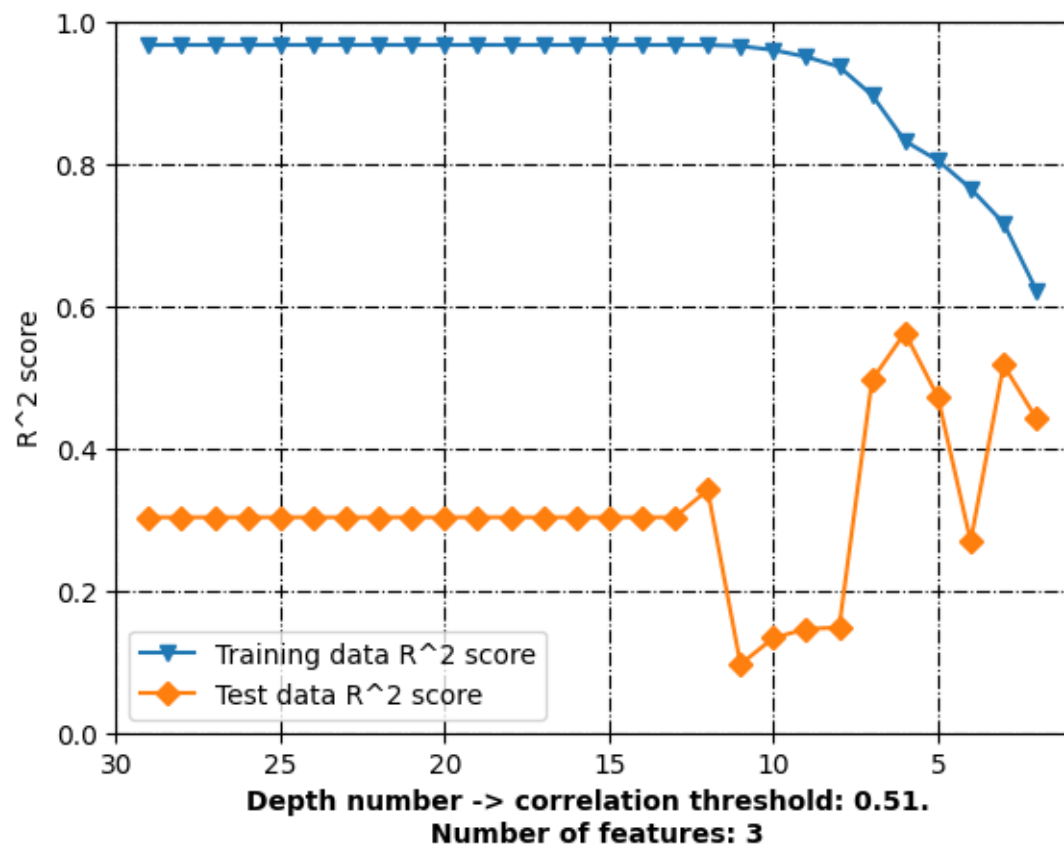



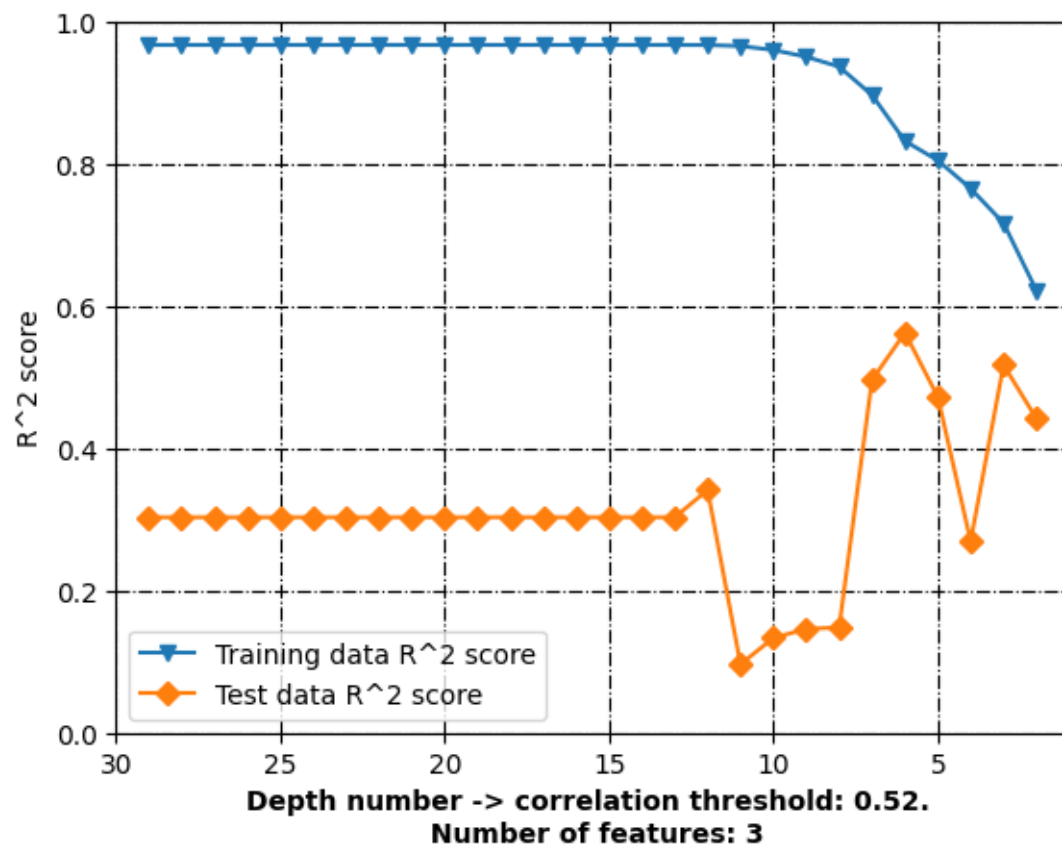

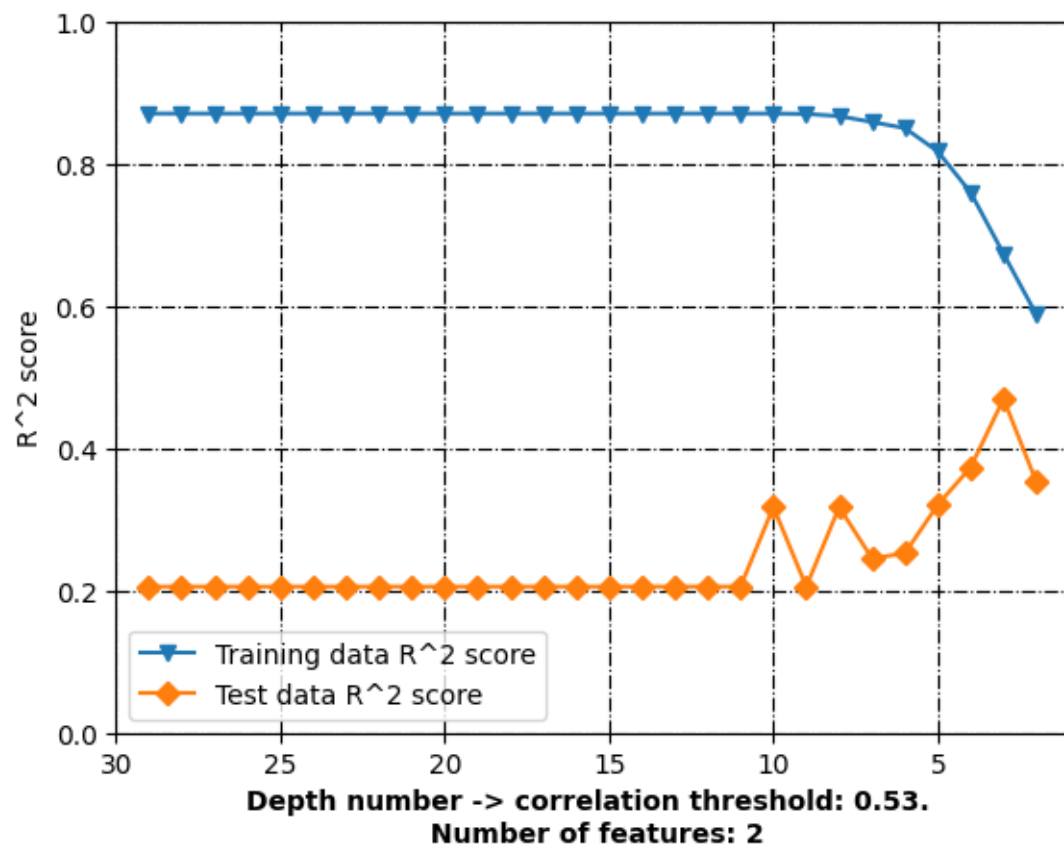

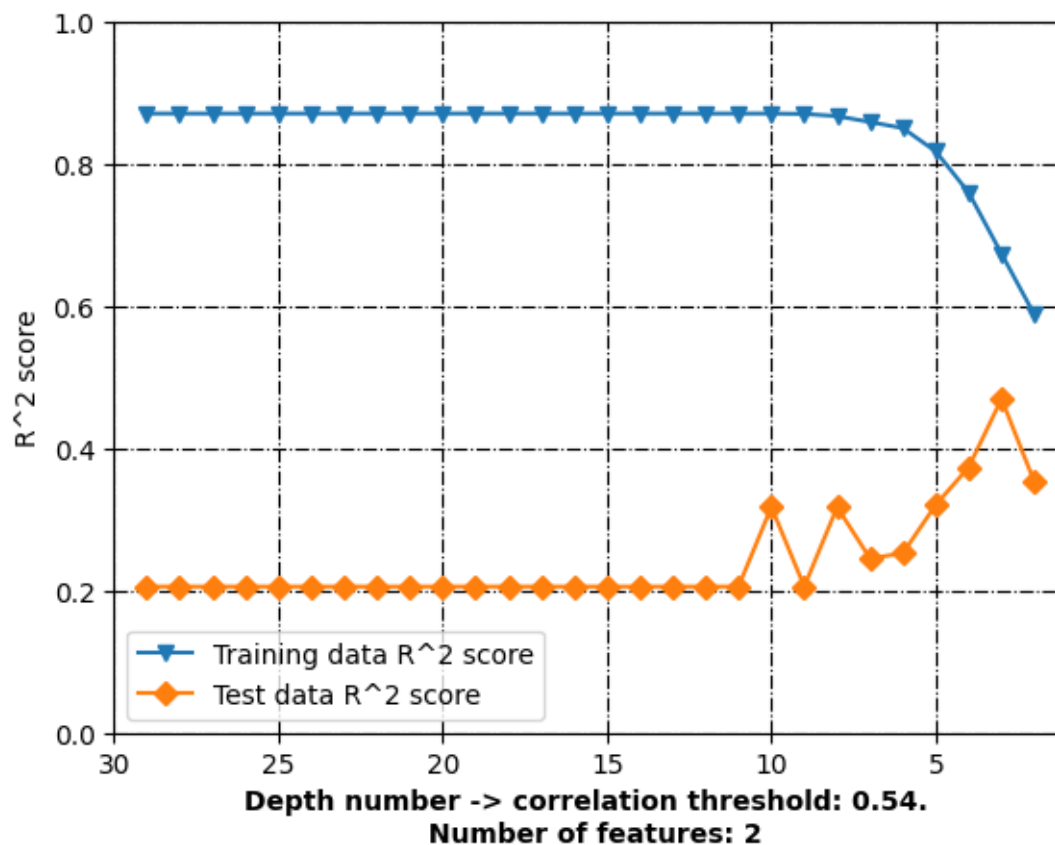

```
[20]: plt.plot(df_without_standardization['Correlation threshold'],
             df_without_standardization['Number of features'], label = "Number of
             features", marker='.')
plt.legend()
plt.xlabel('Correlation threshold')
plt.ylabel('Number of features')
plt.show()
```



[ ]:

### 3 Random Forest

```
[21]: without_standardization, train_r2_, test_r2_, hist1, hist2, target_column_name,
      ↪ training_data_RMSE, test_data_RMSE = pred_model.
      ↪ prepare_data_and_create_model(molecular_descriptors_df=data,
      ↪
      ↪         correlation_threshold=0.50,
      ↪
      ↪         standardization=False,
      ↪
      ↪         model_type='RandomForestRegressor',
      ↪
      ↪         n_estimators=12,
      ↪
      ↪         target_column_name = target,
      ↪
      ↪         random_state=random_state,
```

```

↪          train_test_split_=True,
↪          verbose=True)

```

I am not doing standardization...

```

molecular descriptor name
0          AATSOZ
1          AATSOare
2          AATSOd
3          AATSOdv
4          AATSOi
molecular descriptor name  corr_value
0          AATSOZ      -0.027037
1          AATSOare    -0.129823
2          AATSOd      0.042740
3          AATSOdv     -0.120173
4          AATSOi      0.132395
molecular descriptor name  corr_value  absolute correlation value
0          AATSOZ      -0.027037          0.027037
1          AATSOare    -0.129823          0.129823
2          AATSOd      0.042740          0.042740
3          AATSOdv     -0.120173          0.120173
4          AATSOi      0.132395          0.132395
molecular descriptor name  corr_value  absolute correlation value
226          AMID_0      -0.524157          0.524157
505          EState_VSA5  -0.579664          0.579664
791          MDEO-12     -0.558727          0.558727
851          NdssC       -0.506855          0.506855
1091         VSA_EState5  0.503578          0.503578
molecular descriptor name  corr_value  absolute correlation value
226          AMID_0      -0.524157          0.524157
505          EState_VSA5  -0.579664          0.579664
791          MDEO-12     -0.558727          0.558727
851          NdssC       -0.506855          0.506855
1091         VSA_EState5  0.503578          0.503578
The model used is: RandomForest...
Return the coefficient of determination of the prediction:
0.43879969172007904
R^2 score: 0.9116702784829944
Correlation coefficient: 0.9548142638665357
Test data - unseen during training:
R^2 score: 0.43879969172007904
Correlation coefficient: 0.6624195737748689
[7.78203756 8.2311727 7.86241599 7.58647733 5.55112428 8.22495905
 7.70238976 7.9122974 8.21435838 8.07512252 7.60532507 7.499756
 8.129522 6.87536406 7.8184975 7.78203756 8.14011191 8.05270232]
44          8.508638

```

```
47      7.920819
4       7.277366
55      7.920819
26      5.208801
64      8.327902
73      7.886057
10      8.102373
40      8.050610
107     8.017729
18      7.140261
62      8.657577
11      8.107905
36      7.017729
89      8.638272
91      10.000000
109     7.886057
0       8.187087
```

```
Name: LoVo, dtype: float64
```

```
Training Root Mean Square Error: 0.2648627793983205
```

```
Testing Root Mean Square Error: 0.6895106476870391
```

```
[22]: print(target_column_name+str('_transformed'))
      print(hist1[target_column_name].hist())
```

```
LoVo_transformed
```

```
AxesSubplot(0.125,0.11;0.775x0.77)
```



```
[23]: with_standardization, train_r2_, test_r2_, hist1, hist2, target_column_name,
      ↪ training_data_RMSE, test_data_RMSE = pred_model.
      ↪ prepare_data_and_create_model(molecular_descriptors_df=data,
      ↪
      ↪         correlation_threshold=0.50,
      ↪
      ↪         standardization=True,
      ↪
      ↪         model_type='RandomForestRegressor',
      ↪
      ↪         n_estimators=12,
      ↪
      ↪         target_column_name = target,
      ↪
      ↪         random_state=random_state,
      ↪
      ↪         train_test_split=True,
      ↪
      ↪         verbose=True)
```

I am doing standardization...  
 molecular descriptor name

|      |                           |            |                            |
|------|---------------------------|------------|----------------------------|
| 0    | AATSOZ                    |            |                            |
| 1    | AATSOare                  |            |                            |
| 2    | AATSOd                    |            |                            |
| 3    | AATSOdv                   |            |                            |
| 4    | AATSOi                    |            |                            |
|      | molecular descriptor name | corr_value |                            |
| 0    | AATSOZ                    | -0.027037  |                            |
| 1    | AATSOare                  | -0.129823  |                            |
| 2    | AATSOd                    | 0.042740   |                            |
| 3    | AATSOdv                   | -0.120173  |                            |
| 4    | AATSOi                    | 0.132395   |                            |
|      | molecular descriptor name | corr_value | absolute correlation value |
| 0    | AATSOZ                    | -0.027037  | 0.027037                   |
| 1    | AATSOare                  | -0.129823  | 0.129823                   |
| 2    | AATSOd                    | 0.042740   | 0.042740                   |
| 3    | AATSOdv                   | -0.120173  | 0.120173                   |
| 4    | AATSOi                    | 0.132395   | 0.132395                   |
|      | molecular descriptor name | corr_value | absolute correlation value |
| 226  | AMID_0                    | -0.524157  | 0.524157                   |
| 505  | EState_VSA5               | -0.579664  | 0.579664                   |
| 791  | MDEO-12                   | -0.558727  | 0.558727                   |
| 851  | NdssC                     | -0.506855  | 0.506855                   |
| 1091 | VSA_EState5               | 0.503578   | 0.503578                   |
|      | molecular descriptor name | corr_value | absolute correlation value |
| 226  | AMID_0                    | -0.524157  | 0.524157                   |
| 505  | EState_VSA5               | -0.579664  | 0.579664                   |
| 791  | MDEO-12                   | -0.558727  | 0.558727                   |
| 851  | NdssC                     | -0.506855  | 0.506855                   |
| 1091 | VSA_EState5               | 0.503578   | 0.503578                   |

The model used is: RandomForest...

Return the coefficient of determination of the prediction:

0.43879969172007904

R<sup>2</sup> score: 0.9116702784829944

Correlation coefficient: 0.9548142638665357

Test data - unseen during training:

R<sup>2</sup> score: 0.43879969172007904

Correlation coefficient: 0.6624195737748689

[7.78203756 8.2311727 7.86241599 7.58647733 5.55112428 8.22495905  
7.70238976 7.9122974 8.21435838 8.07512252 7.60532507 7.499756  
8.129522 6.87536406 7.8184975 7.78203756 8.14011191 8.05270232]  
44 8.508638  
47 7.920819  
4 7.277366  
55 7.920819  
26 5.208801  
64 8.327902  
73 7.886057  
10 8.102373



```

40      8.050610
107     8.017729
18      7.140261
62      8.657577
11      8.107905
36      7.017729
89      8.638272
91     10.000000
109     7.886057
0       8.187087

```

Name: LoVo, dtype: float64

Training Root Mean Square Error: 0.2648627793983205

Testing Root Mean Square Error: 0.6895106476870391

### 3.1 Search inside correlation space

```

[24]: step = 0.01
initial_step = corr_low
last_step = corr_high
first_list = [x / 100.0 for x in range(int(initial_step*100),
    ↪int(last_step*100), int(step*100))]
n_estimators = [range(2,21,1)]
corr_th = []
second_list = []
third_list = []
fourth_l = []
fifth_l = []
f_list = []
fif_list = []
for i in first_list:

    for estimator in n_estimators[0]:

        without_standardization, train_r2, test_r2, _, h_, target_column_name,
    ↪training_data_RMSE, test_data_RMSE = pred_model.
    ↪prepare_data_and_create_model(molecular_descriptors_df=data,

    ↪                                correlation_threshold=i,
    ↪                                standardization=False,
    ↪                                model_type='RandomForestRegressor',
    ↪                                n_estimators_=estimator,
    ↪                                target_column_name = target,

```

```

    random_state=random_state,

    train_test_split_=True,

    verbose=False)
    corr_th.append(i)
    second_list.append(train_r2)
    third_list.append(test_r2)
    fourth_l.append(training_data_RMSE)
    fifth_l.append(test_data_RMSE)
    f_list.append(len(h_))
    fif_list.append(estimator)

```

```

[25]: df_without_standardization = pd.DataFrame(data=corr_th, columns=["Correlation_
    ↪threshold"])
df_without_standardization['Training data R^2 score'] = second_list
df_without_standardization['Test data R^2 score'] = third_list
df_without_standardization['Training RMSE'] = fourth_l
df_without_standardization['Test RMSE'] = fifth_l
df_without_standardization['Number of features'] = f_list
df_without_standardization['Number of estimators'] = fif_list

```

```

[26]: df_random_forest = df_without_standardization.copy()
#df_without_standardization.to_excel('../Data/
    ↪A549_Random_forest_rs_'+str(random_state)+'_xlsx')

```

```

[27]: corre_list = [x / 100.0 for x in range(int(initial_step*100),
    ↪int(last_step*100), int(0.01*100))]
for element in corre_list:
    element_ =
    ↪df_without_standardization[df_without_standardization['Correlation_
    ↪threshold'] == float(element)]
    plt.plot(element_['Number of estimators'], element_['Training data R^2_
    ↪score'], label = "Training data R^2 score", marker='v')
    plt.plot(element_['Number of estimators'], element_['Test data R^2 score'],
    ↪label = "Test data R^2 score", marker='D')
    plt.legend()
    plt.xlabel('Number of estimators -> correlation threshold: '+str(element)+'.'
    ↪\n Number of features: '+str(element_['Number of features'].iloc[0]))
    plt.xlim(max(element_['Number of estimators'])+1, min(element_['Number of_
    ↪estimators'])-1)
    plt.ylabel('R^2 score')
    plt.ylim([0, 1])
    plt.rc('grid', linestyle="-. ", color='black')
    plt.grid(True)

```

```
plt.show()
```

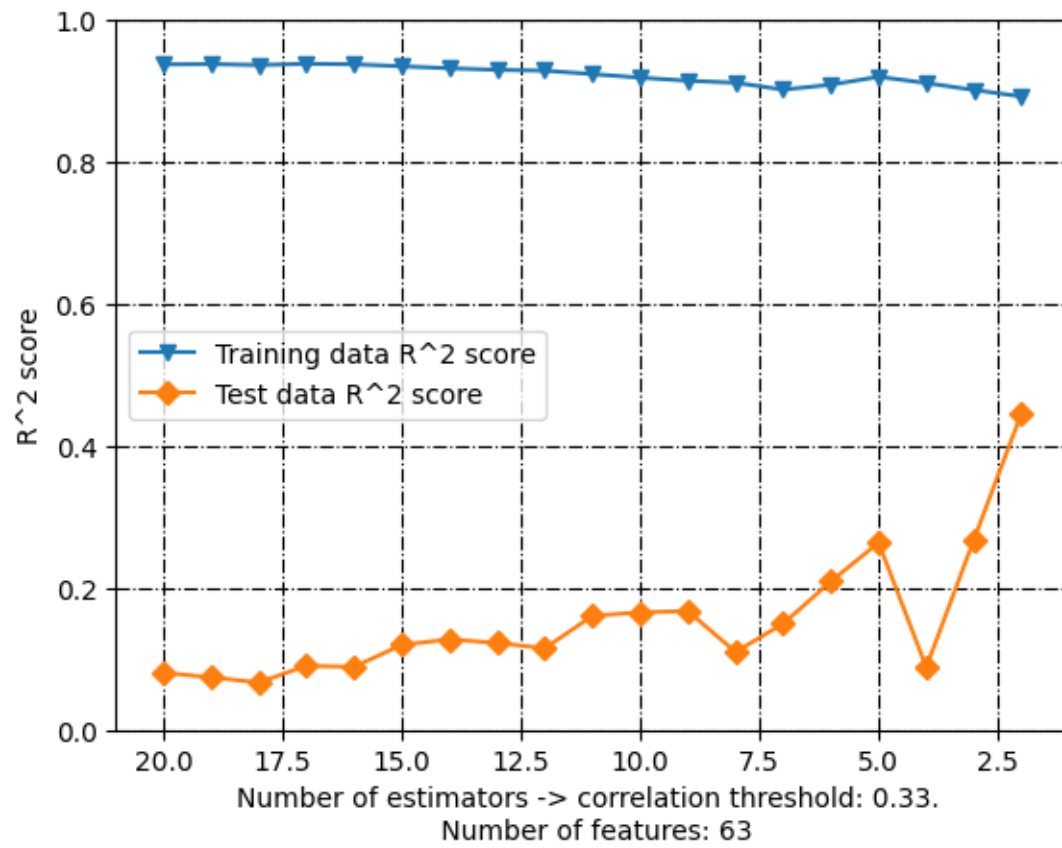

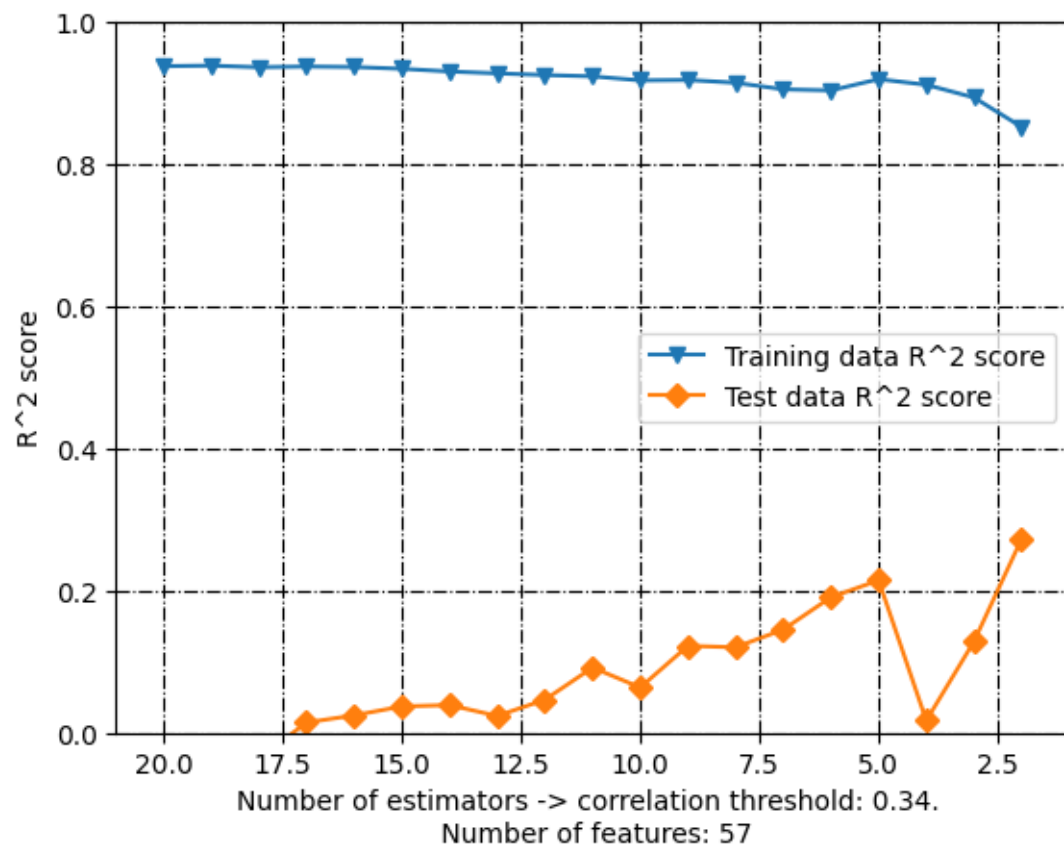

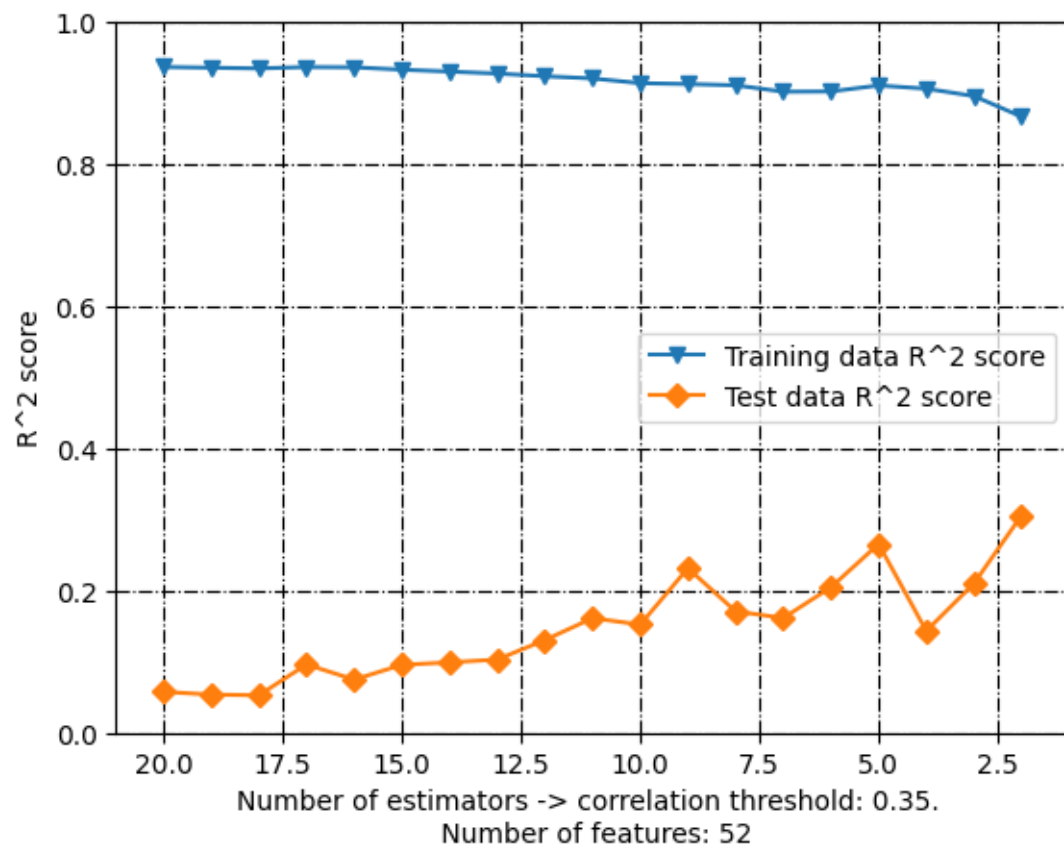

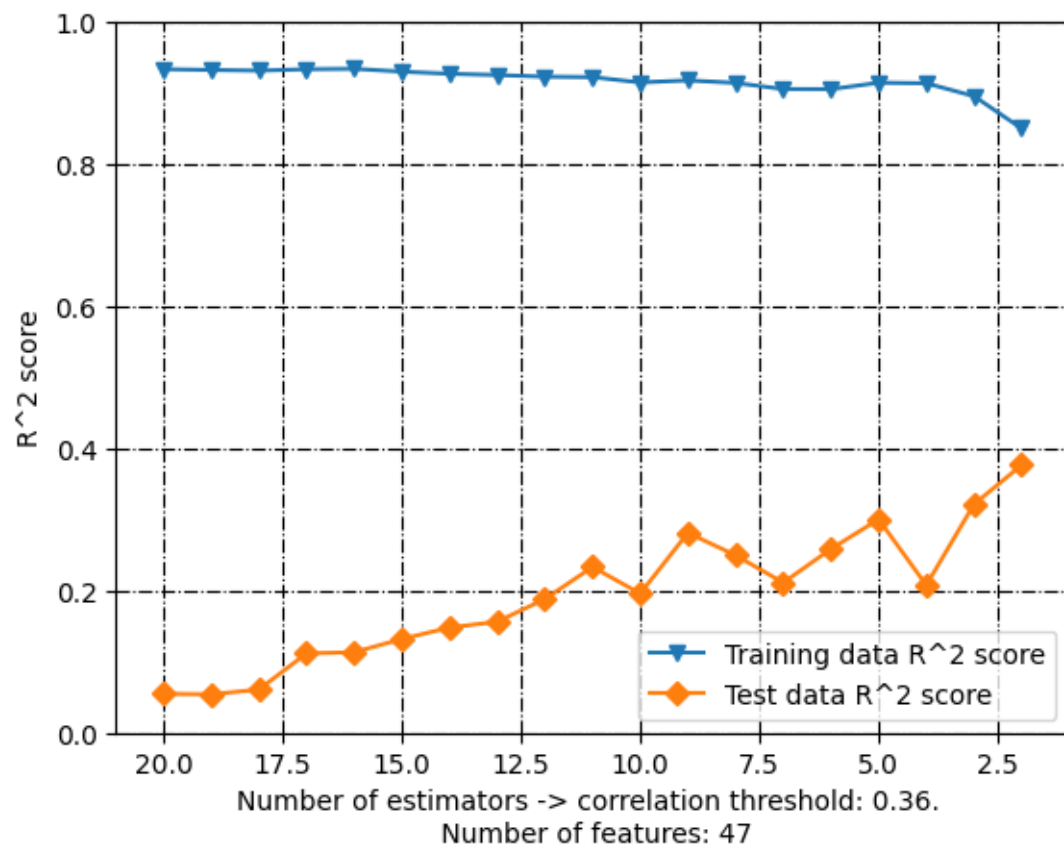

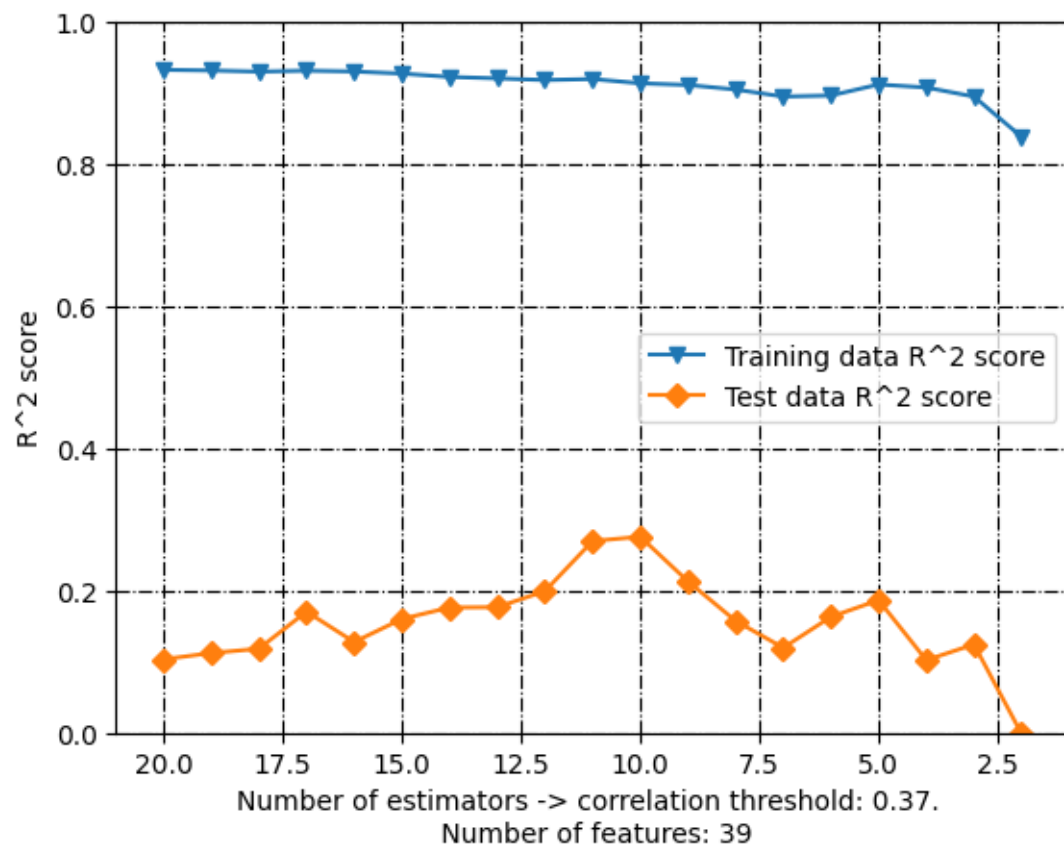

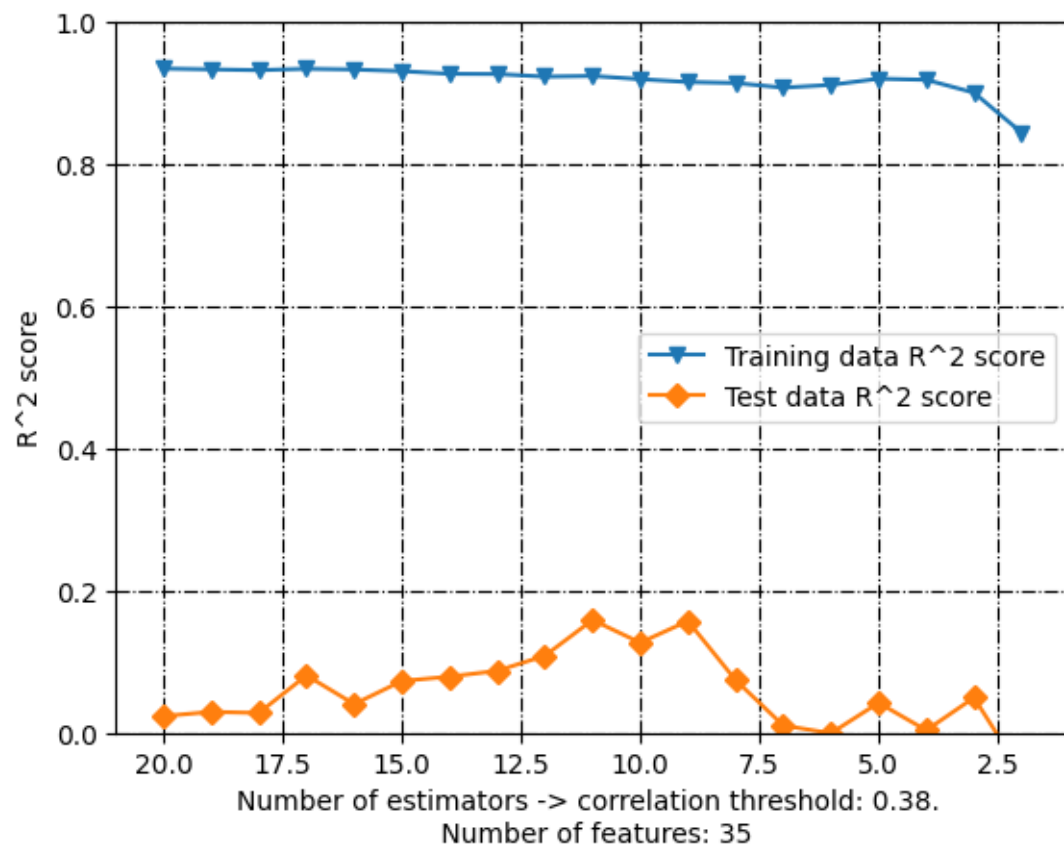



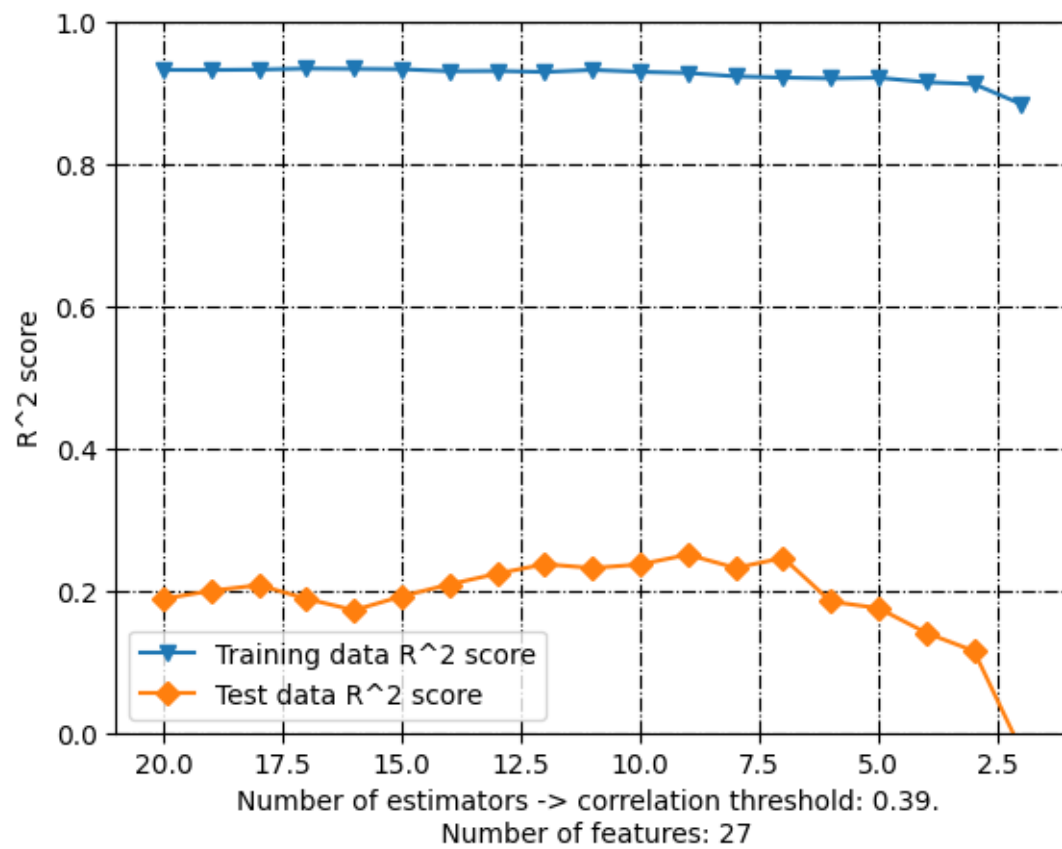

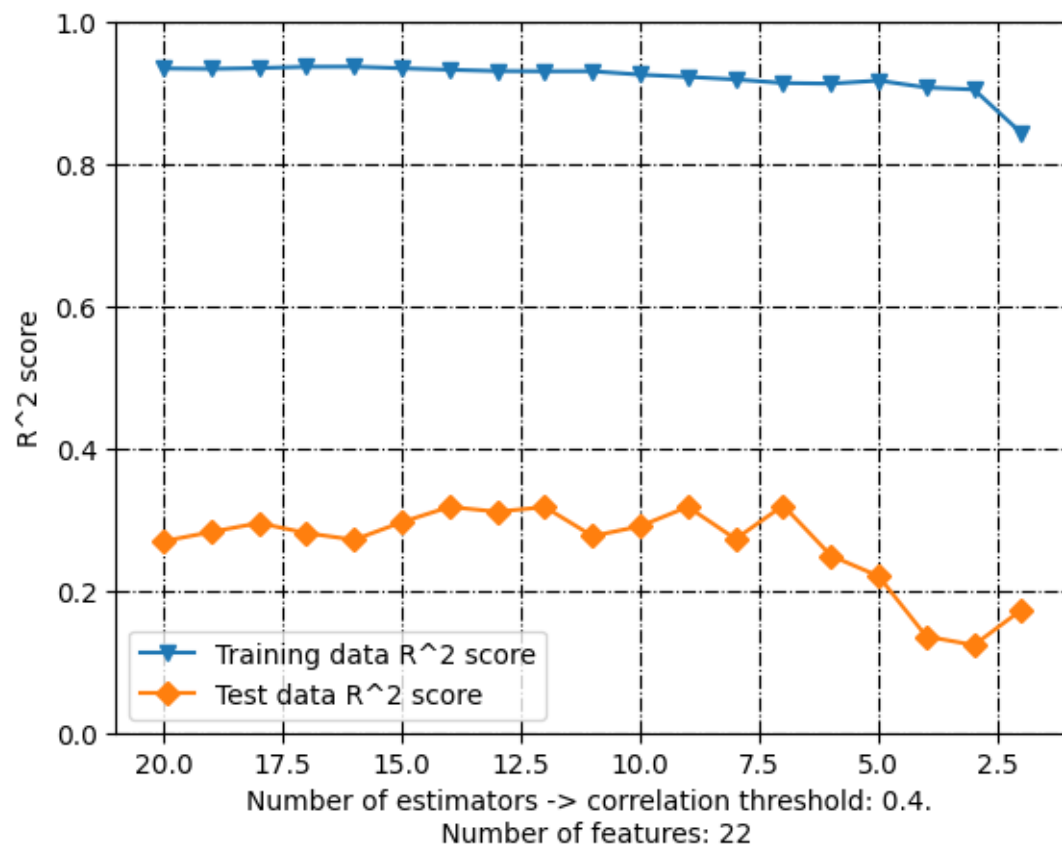

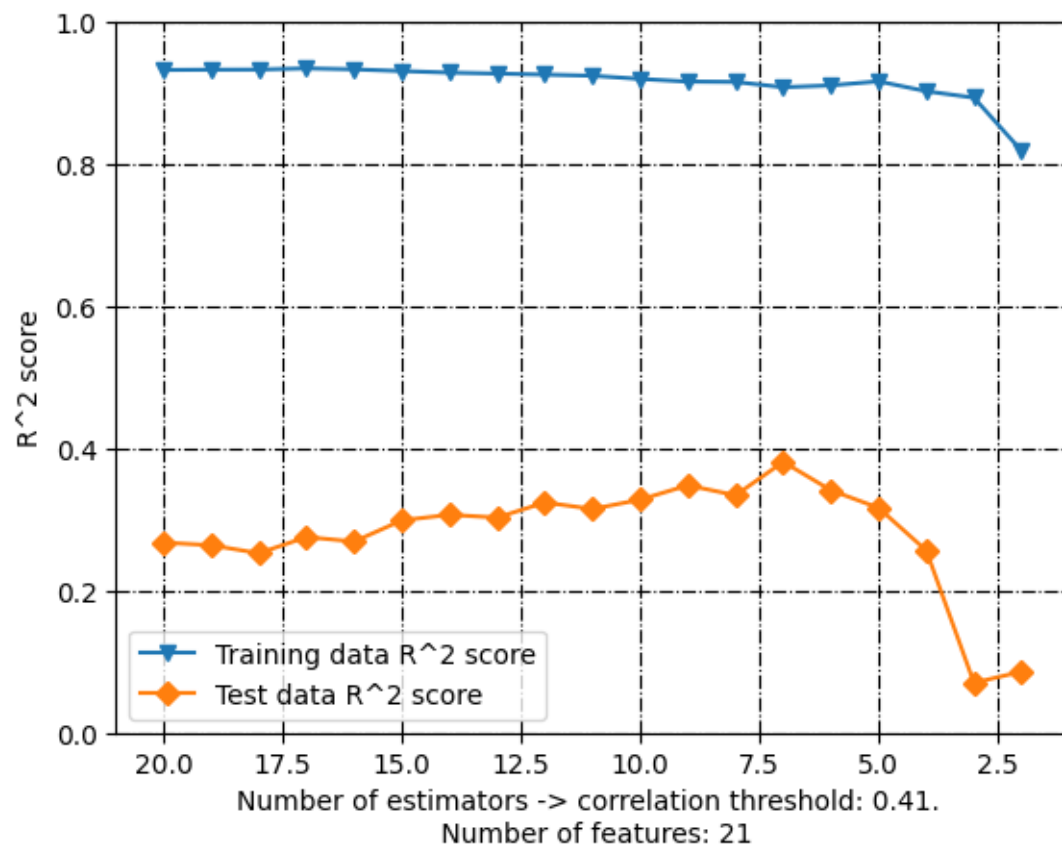

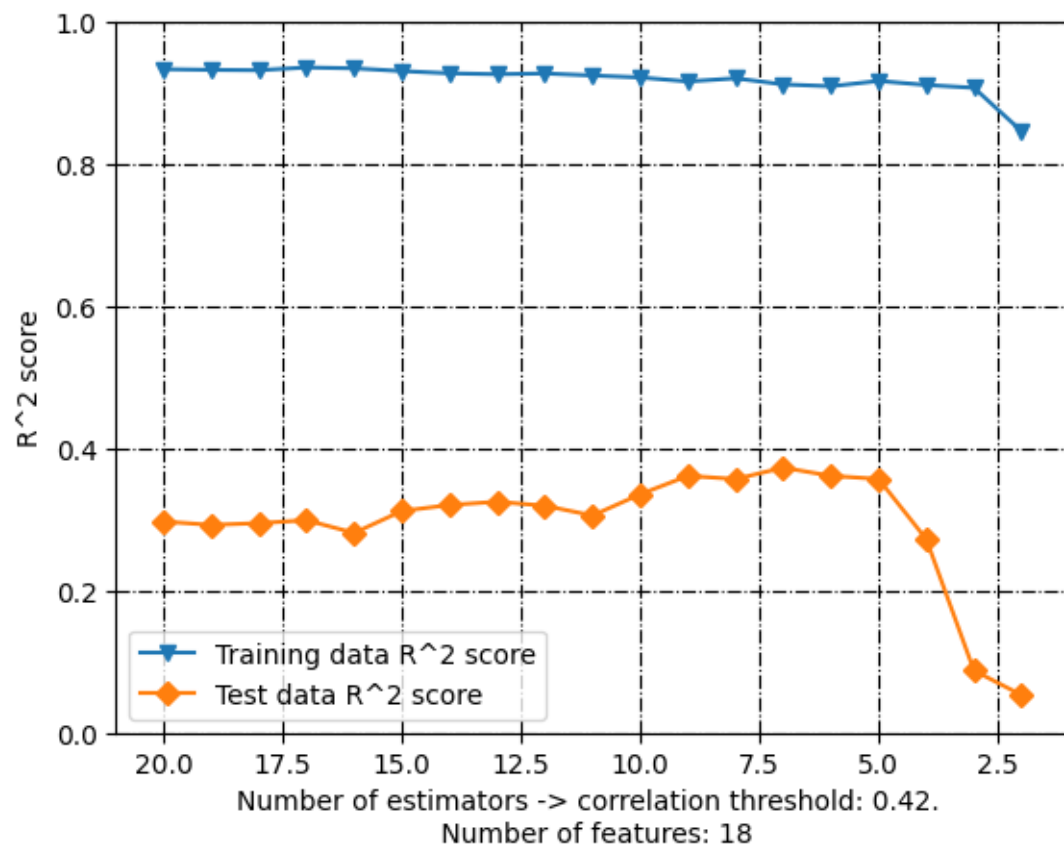

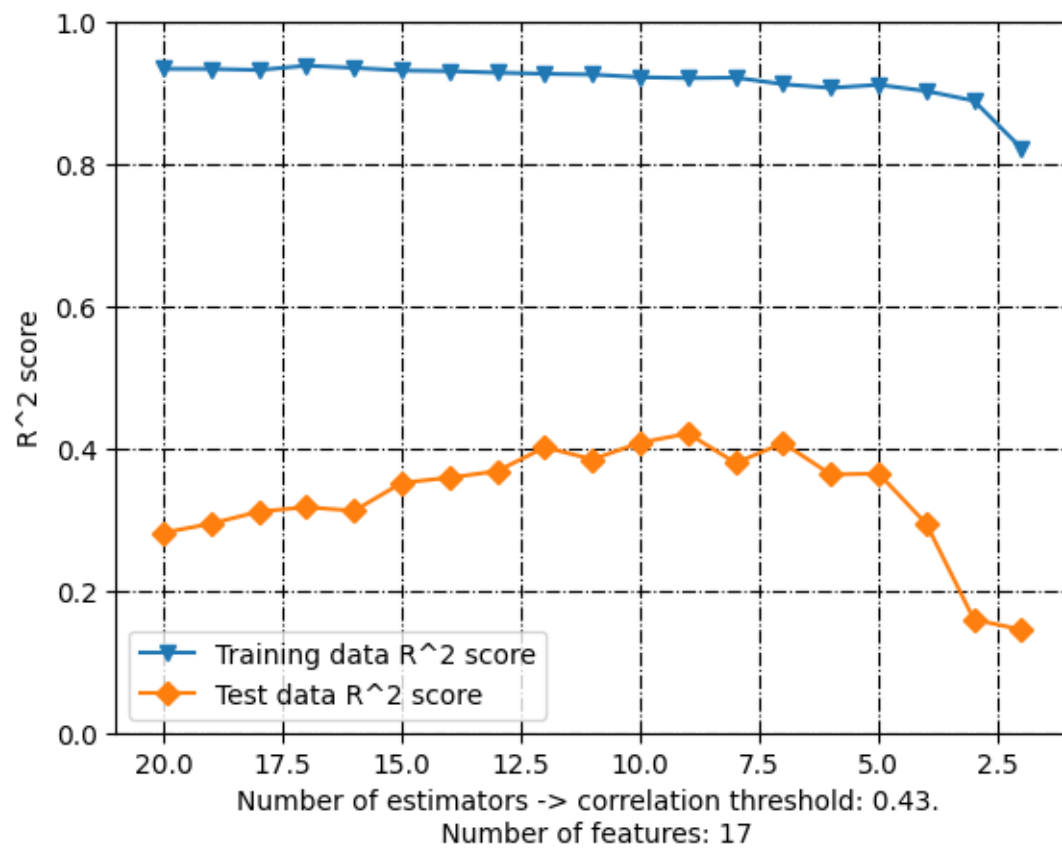

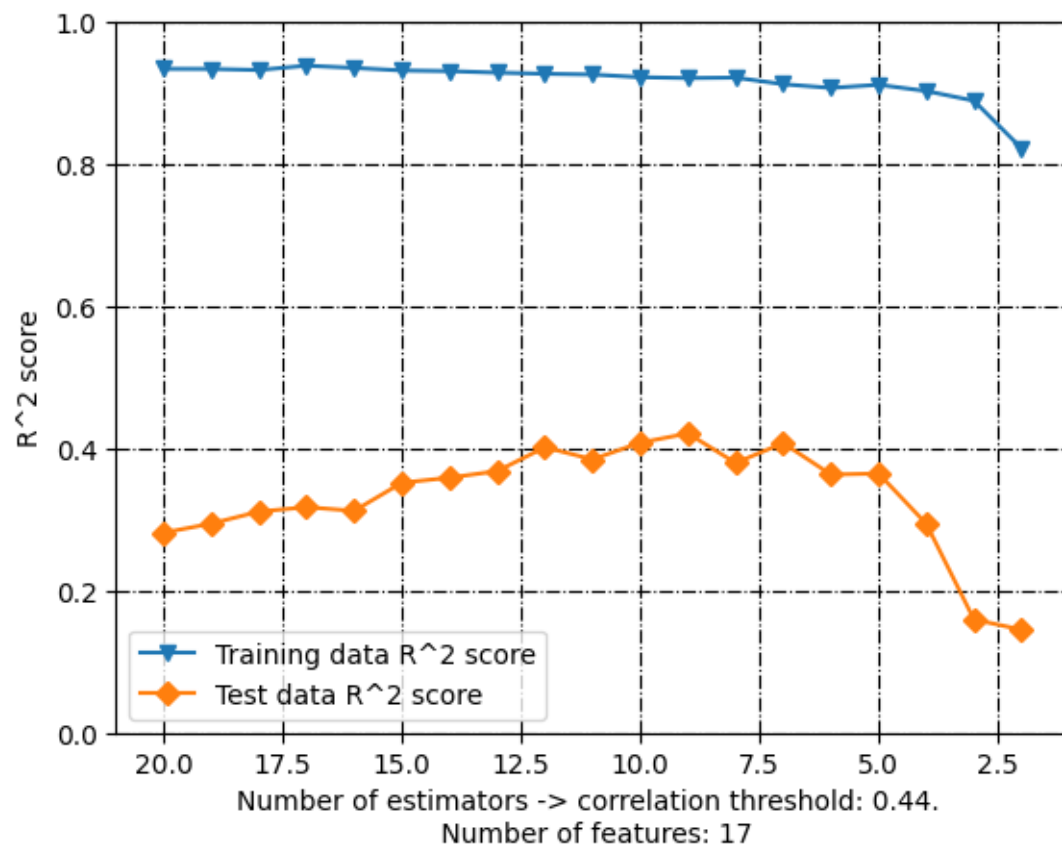

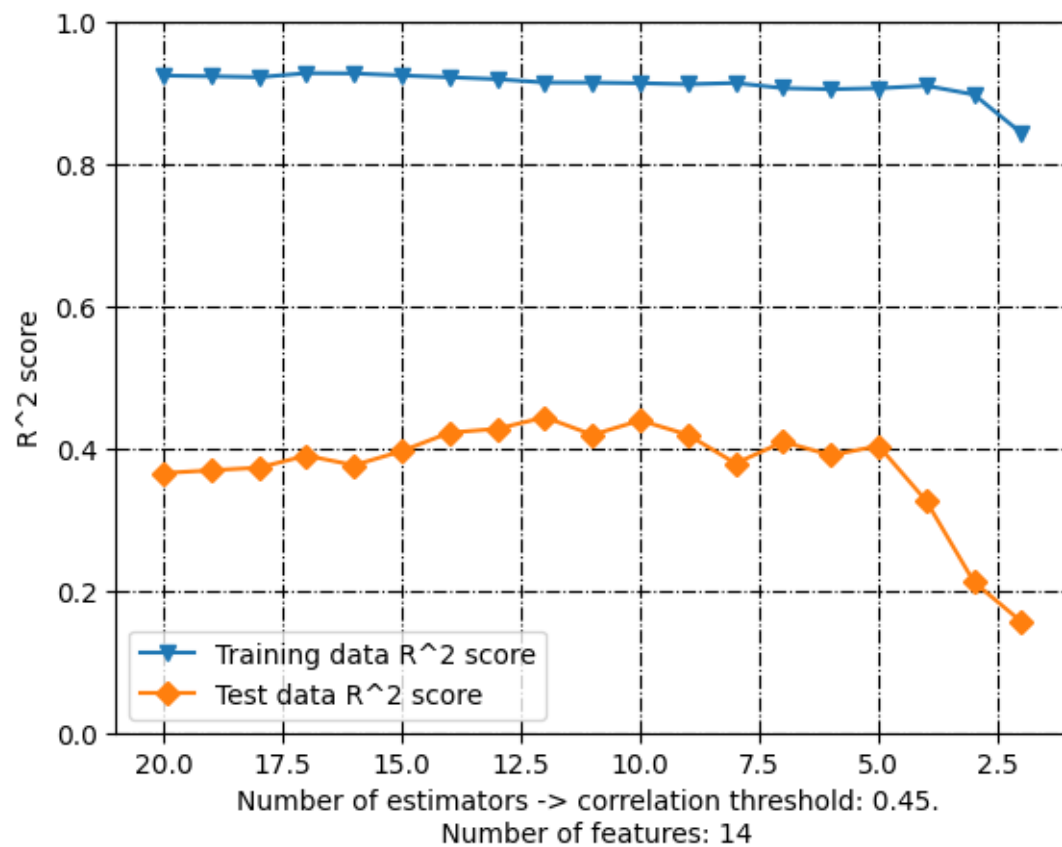

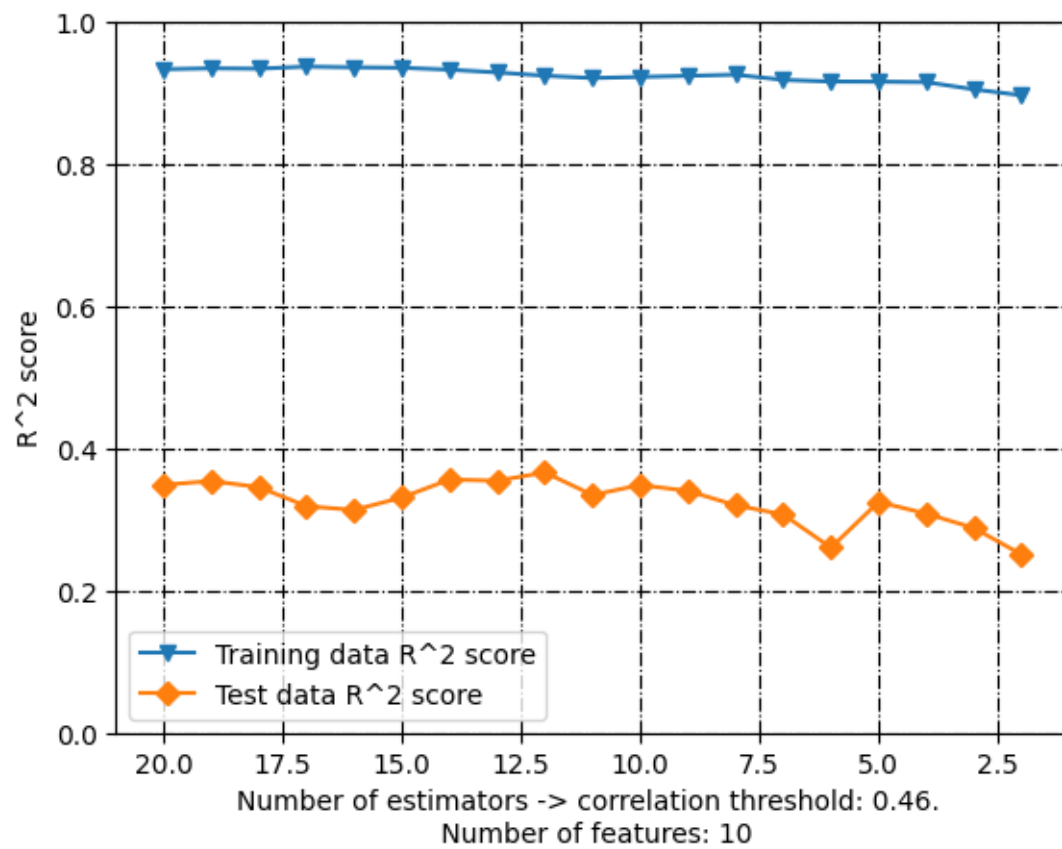



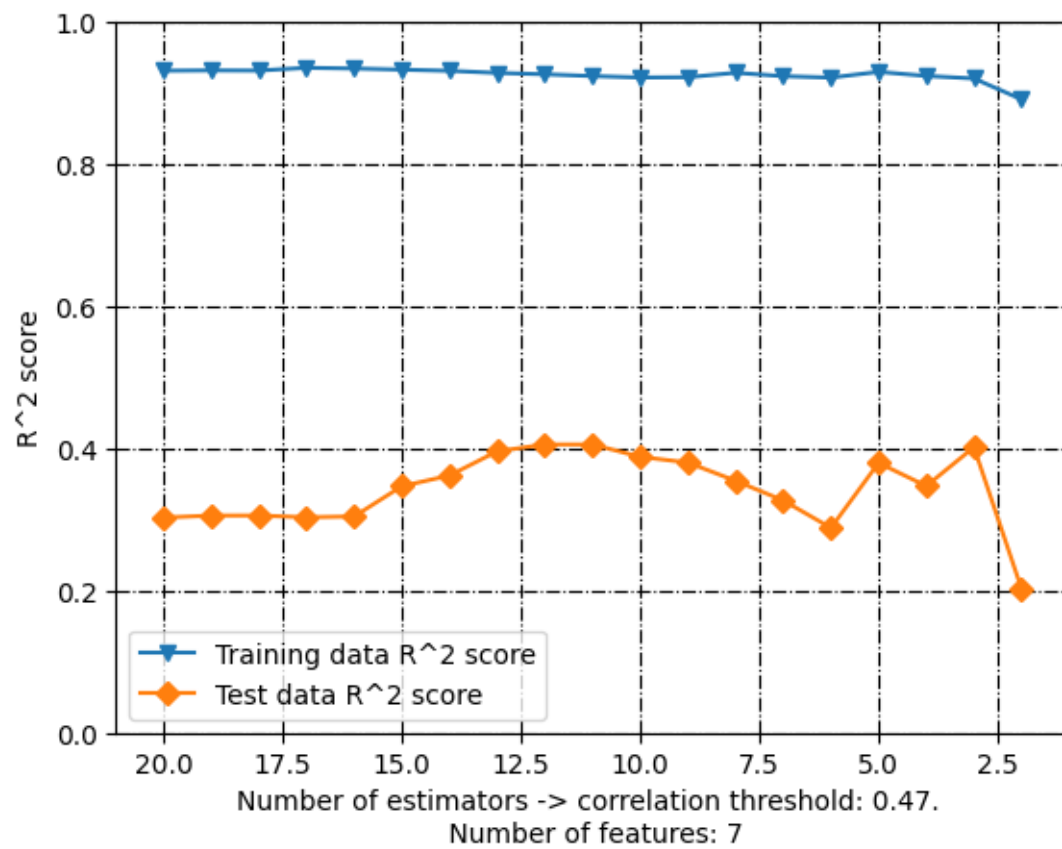

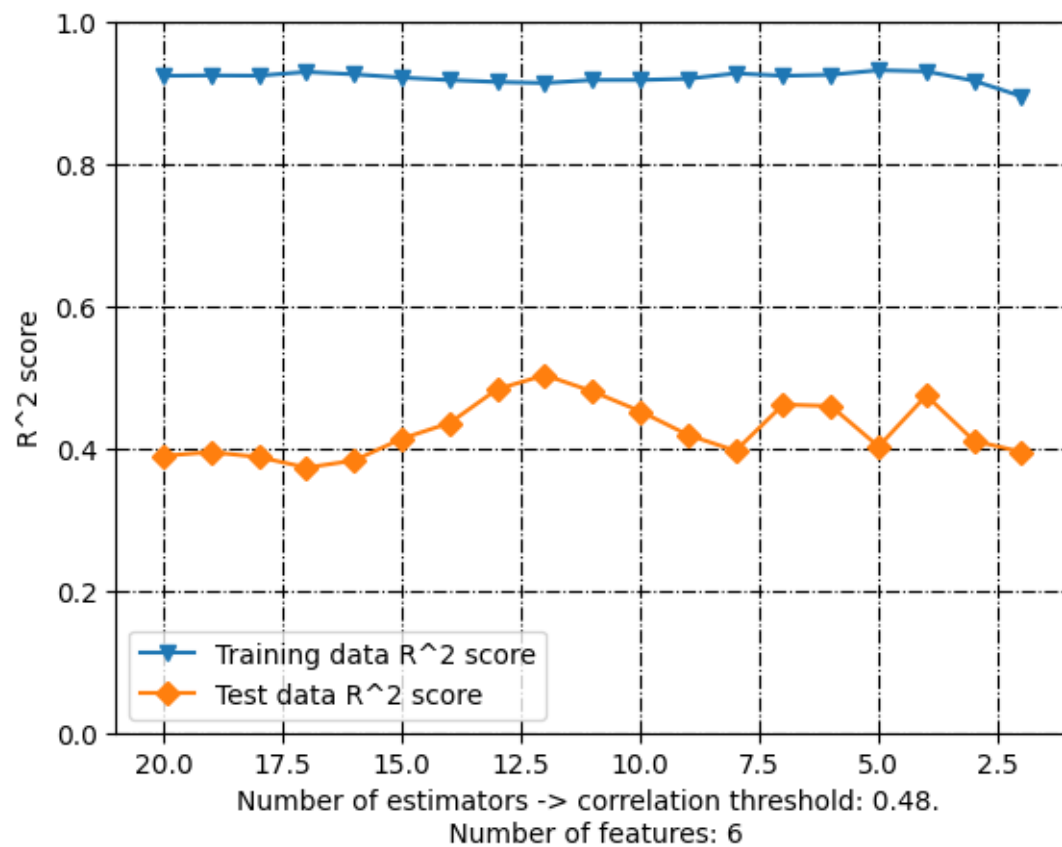

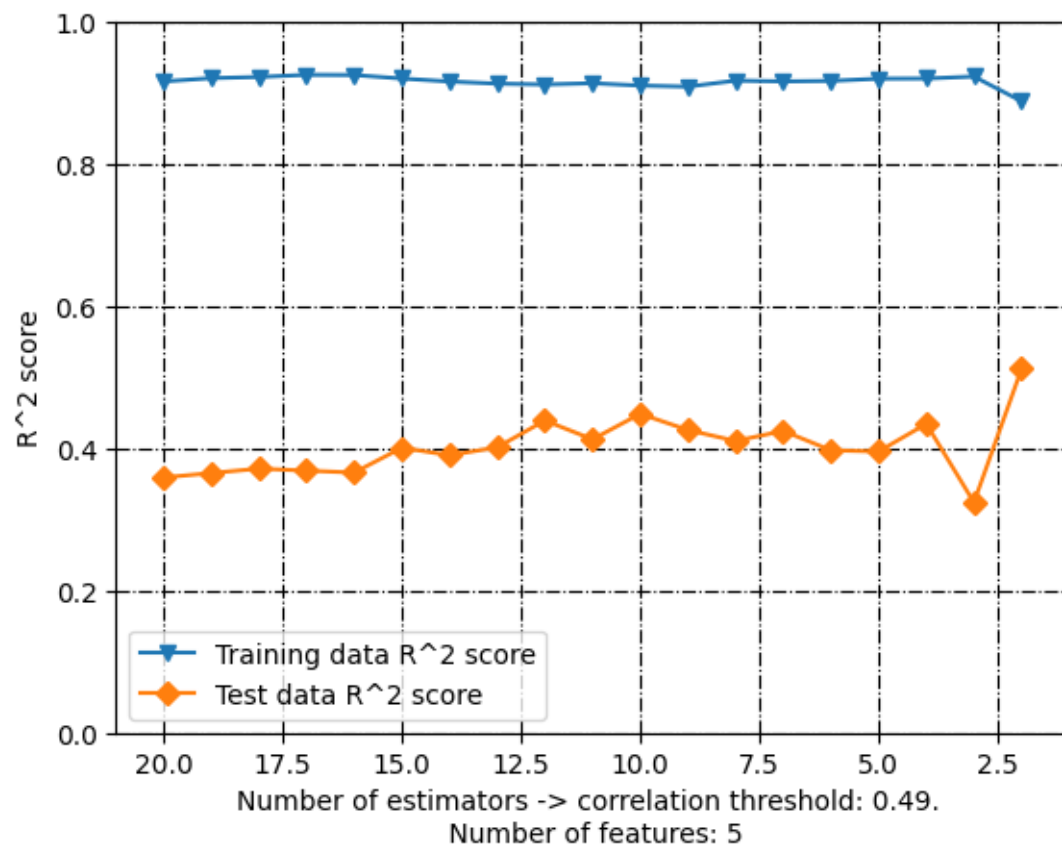

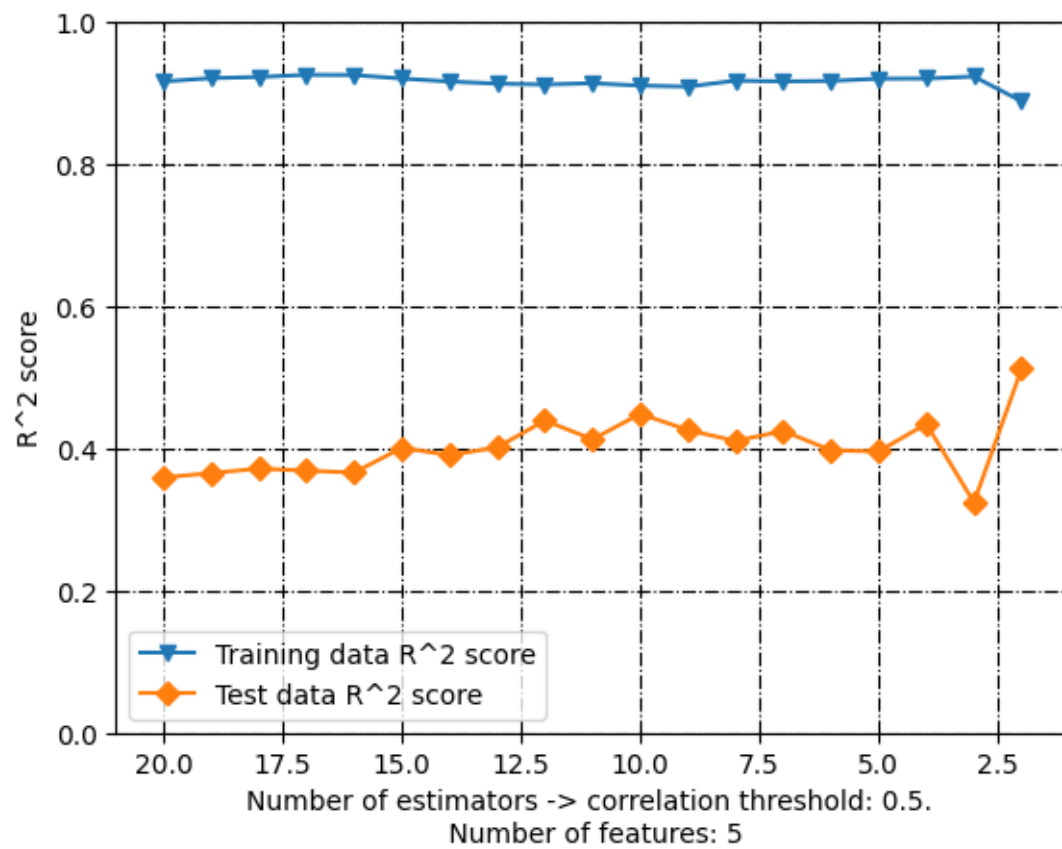

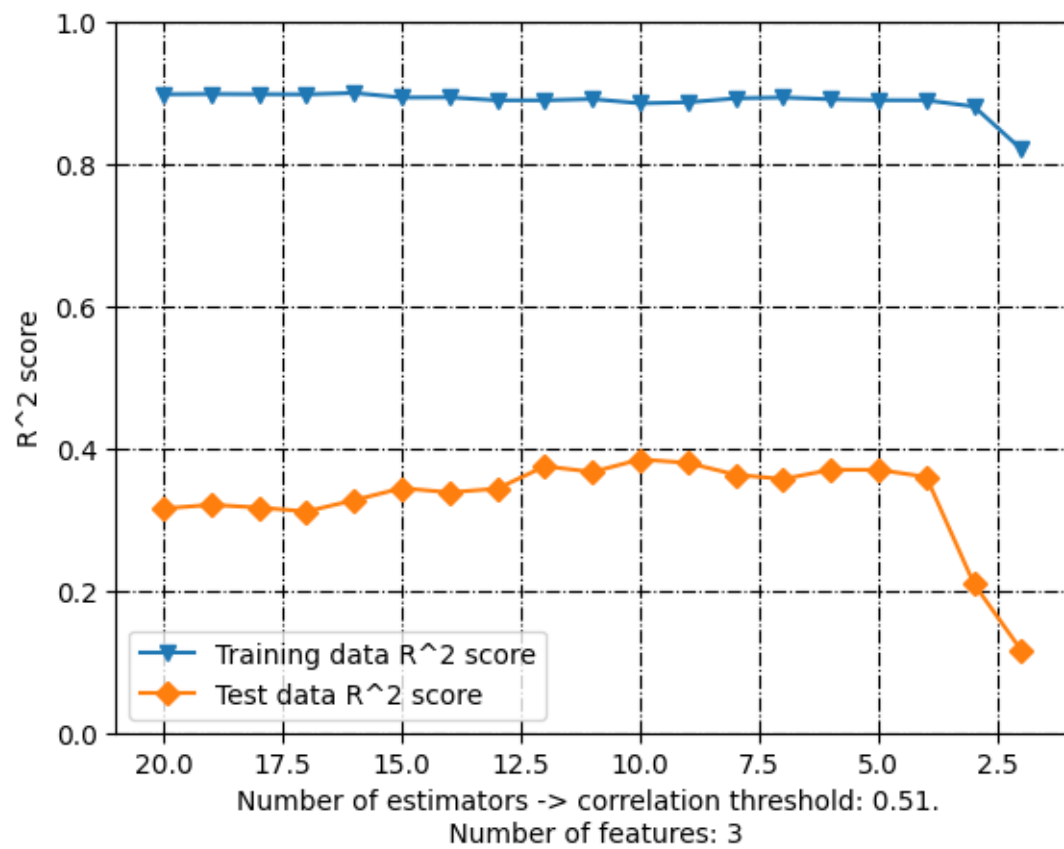

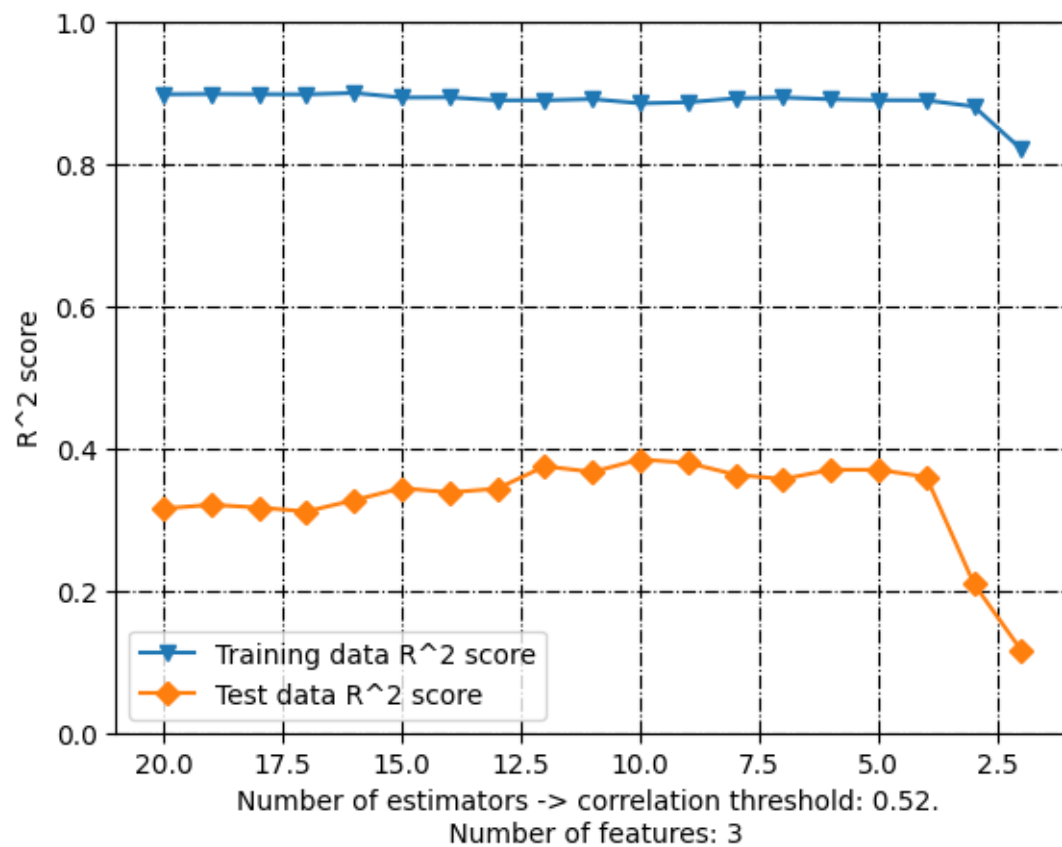

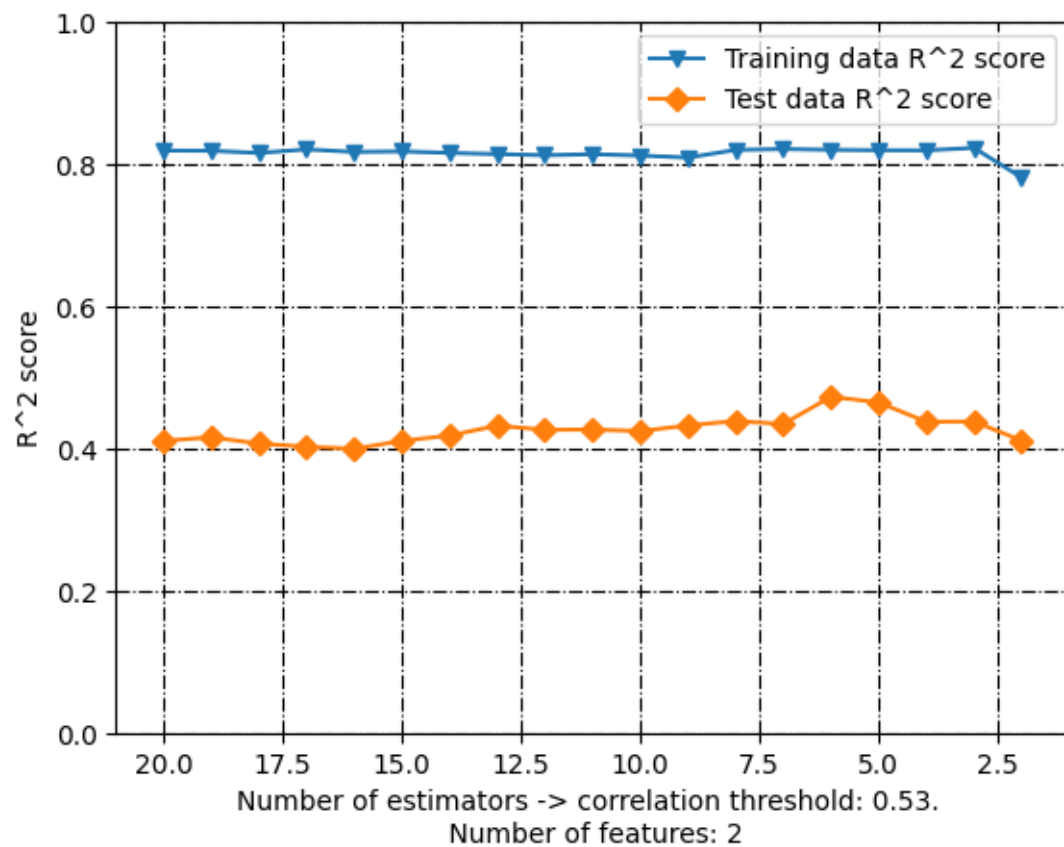

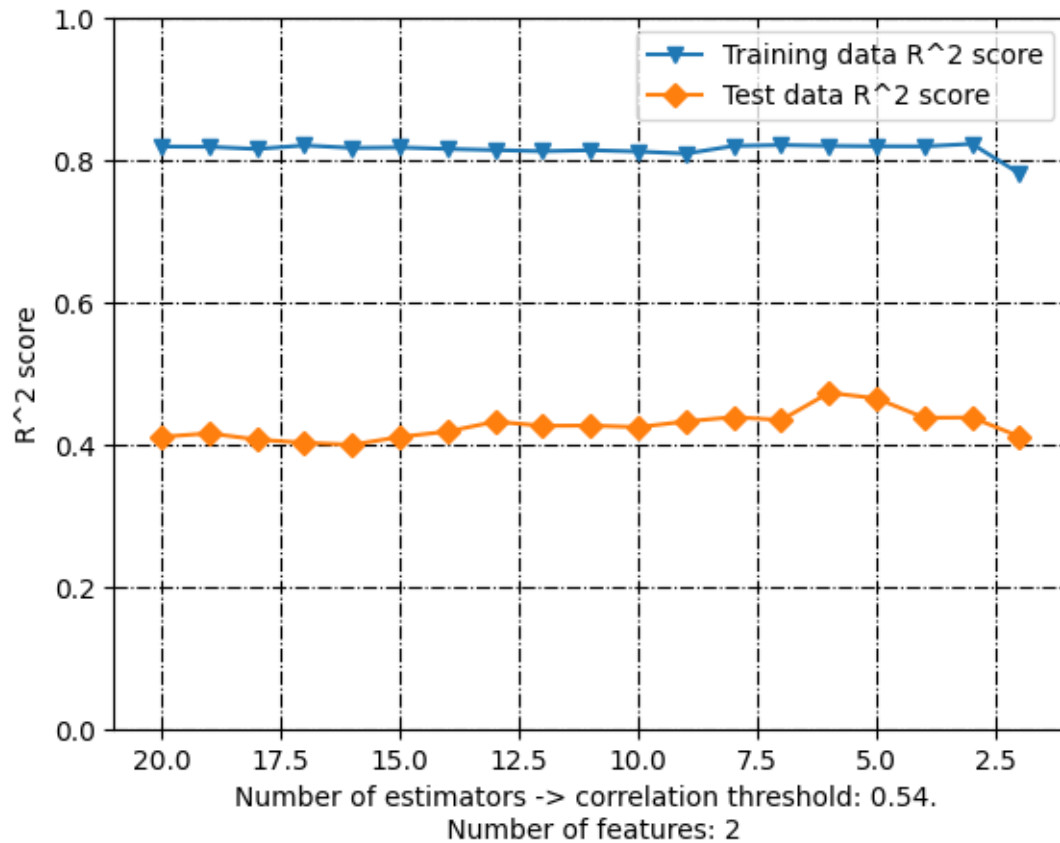

```
[28]: plt.plot(df_without_standardization['Correlation threshold'],
             df_without_standardization['Number of features'], label = "Number of
             features", marker='.')
plt.legend()
plt.xlabel('Correlation threshold')
plt.ylabel('Number of features')
plt.show()
```





[ ]:

## 4 KNeighborsRegressor

```
[29]: without_standardization, train_r2_, test_r2_, hist1, hist2, target_column_name,
      ↪ training_data_RMSE, test_data_RMSE = pred_model.
      ↪ prepare_data_and_create_model(molecular_descriptors_df=data,
      ↪
      ↪         correlation_threshold=0.50,
      ↪
      ↪         standardization=False,
      ↪
      ↪         model_type='KNeighborsRegressor',
      ↪
      ↪         target_column_name = target,
      ↪
      ↪         random_state=random_state,
      ↪
      ↪         train_test_split_=True,
```



verbose=True)



I am not doing standardization...

```
molecular descriptor name
0          AATSOZ
1          AATSOare
2          AATSOd
3          AATSOdv
4          AATSOi
molecular descriptor name  corr_value
0          AATSOZ          -0.027037
1          AATSOare        -0.129823
2          AATSOd          0.042740
3          AATSOdv         -0.120173
4          AATSOi          0.132395
molecular descriptor name  corr_value  absolute correlation value
0          AATSOZ          -0.027037          0.027037
1          AATSOare        -0.129823          0.129823
2          AATSOd          0.042740          0.042740
3          AATSOdv         -0.120173          0.120173
4          AATSOi          0.132395          0.132395
molecular descriptor name  corr_value  absolute correlation value
226          AMID_0        -0.524157          0.524157
505          EState_VSA5    -0.579664          0.579664
791          MDEO-12        -0.558727          0.558727
851          NdssC          -0.506855          0.506855
1091         VSA_EState5     0.503578          0.503578
molecular descriptor name  corr_value  absolute correlation value
226          AMID_0        -0.524157          0.524157
505          EState_VSA5    -0.579664          0.579664
791          MDEO-12        -0.558727          0.558727
851          NdssC          -0.506855          0.506855
1091         VSA_EState5     0.503578          0.503578
The model used is: KNeighbors...
Return the coefficient of determination of the prediction:
0.21255820544251047
R^2 score: 0.5727423256167272
Correlation coefficient: 0.7567974138544127
Test data - unseen during training:
R^2 score: 0.21255820544251047
Correlation coefficient: 0.46104035120855796
[8.22416706 8.18750292 7.48521712 7.82052038 6.90143604 8.26160013
 7.64548415 7.64404502 7.99494145 7.8041874 7.3418408 7.37284186
 7.62904255 5.73797021 7.37284186 8.22416706 7.8041874 7.64271346]
44          8.508638
47          7.920819
4           7.277366
```

```

55      7.920819
26      5.208801
64      8.327902
73      7.886057
10      8.102373
40      8.050610
107     8.017729
18      7.140261
62      8.657577
11      8.107905
36      7.017729
89      8.638272
91      10.000000
109     7.886057
0       8.187087

```

Name: LoVo, dtype: float64

Training Root Mean Square Error: 0.5825221417711341

Testing Root Mean Square Error: 0.8167539764598583

```

[30]: print(target_column_name+str('_transformed'))
      print(hist1[target_column_name].hist())

```

LoVo\_transformed

AxesSubplot(0.125,0.11;0.775x0.77)



```
[31]: with_standardization, train_r2_, test_r2_, hist1, hist2, target_column_name,
      ↪ training_data_RMSE, test_data_RMSE = pred_model.
      ↪ prepare_data_and_create_model(molecular_descriptors_df=data,
      ↪
      ↪         correlation_threshold=0.50,
      ↪
      ↪         standardization=True,
      ↪
      ↪         model_type='KNeighborsRegressor',
      ↪
      ↪         target_column_name = target,
      ↪
      ↪         random_state=random_state,
      ↪
      ↪         train_test_split_=True,
      ↪
      ↪         verbose=True)
```

I am doing standardization...

|      | molecular descriptor name |            |                            |
|------|---------------------------|------------|----------------------------|
| 0    | AATS0Z                    |            |                            |
| 1    | AATS0are                  |            |                            |
| 2    | AATS0d                    |            |                            |
| 3    | AATS0dv                   |            |                            |
| 4    | AATS0i                    |            |                            |
|      | molecular descriptor name | corr_value |                            |
| 0    | AATS0Z                    | -0.027037  |                            |
| 1    | AATS0are                  | -0.129823  |                            |
| 2    | AATS0d                    | 0.042740   |                            |
| 3    | AATS0dv                   | -0.120173  |                            |
| 4    | AATS0i                    | 0.132395   |                            |
|      | molecular descriptor name | corr_value | absolute correlation value |
| 0    | AATS0Z                    | -0.027037  | 0.027037                   |
| 1    | AATS0are                  | -0.129823  | 0.129823                   |
| 2    | AATS0d                    | 0.042740   | 0.042740                   |
| 3    | AATS0dv                   | -0.120173  | 0.120173                   |
| 4    | AATS0i                    | 0.132395   | 0.132395                   |
|      | molecular descriptor name | corr_value | absolute correlation value |
| 226  | AMID_0                    | -0.524157  | 0.524157                   |
| 505  | EState_VSA5               | -0.579664  | 0.579664                   |
| 791  | MDE0-12                   | -0.558727  | 0.558727                   |
| 851  | NdssC                     | -0.506855  | 0.506855                   |
| 1091 | VSA_EState5               | 0.503578   | 0.503578                   |
|      | molecular descriptor name | corr_value | absolute correlation value |
| 226  | AMID_0                    | -0.524157  | 0.524157                   |
| 505  | EState_VSA5               | -0.579664  | 0.579664                   |

|      |             |           |          |
|------|-------------|-----------|----------|
| 791  | MDE0-12     | -0.558727 | 0.558727 |
| 851  | NdssC       | -0.506855 | 0.506855 |
| 1091 | VSA_EState5 | 0.503578  | 0.503578 |

The model used is: KNeighbors...

Return the coefficient of determination of the prediction:

0.21255820544251047

R<sup>2</sup> score: 0.5727423256167272

Correlation coefficient: 0.7567974138544127

Test data - unseen during training:

R<sup>2</sup> score: 0.21255820544251047

Correlation coefficient: 0.46104035120855796

[8.22416706 8.18750292 7.48521712 7.82052038 6.90143604 8.26160013  
7.64548415 7.64404502 7.99494145 7.8041874 7.3418408 7.37284186  
7.62904255 5.73797021 7.37284186 8.22416706 7.8041874 7.64271346]

44 8.508638

47 7.920819

4 7.277366

55 7.920819

26 5.208801

64 8.327902

73 7.886057

10 8.102373

40 8.050610

107 8.017729

18 7.140261

62 8.657577

11 8.107905

36 7.017729

89 8.638272

91 10.000000

109 7.886057

0 8.187087

Name: LoVo, dtype: float64

Training Root Mean Square Error: 0.5825221417711341

Testing Root Mean Square Error: 0.8167539764598583

## 4.1 Search inside correlation space

```
[32]: step = 0.01
initial_step = corr_low
last_step = corr_high
first_list = [x / 100.0 for x in range(int(initial_step*100),
    ↪int(last_step*100), int(step*100))]
second_list = []
third_list = []
fourth_l = []
fifth_l = []
```

```

f_list = []
for i in first_list:
    without_standardization, train_r2, test_r2, _, h_, target_column_name, \
    ↪ training_data_RMSE, test_data_RMSE = pred_model.
    ↪ prepare_data_and_create_model(molecular_descriptors_df = data,

    ↪ correlation_threshold = i,

    ↪ standardization = False,

    ↪ model_type = 'KNeighborsRegressor',

    ↪ target_column_name = target,

    ↪ random_state=random_state,

    ↪ train_test_split_ = True,

    ↪ verbose = False)
    second_list.append(train_r2)
    third_list.append(test_r2)
    fourth_l.append(training_data_RMSE)
    fifth_l.append(test_data_RMSE)
    f_list.append(len(h_))

```

File "C:\Users\aleks\anaconda3\envs\cheminf\_gpu\lib\site-packages\joblib\externals\loky\backend\context.py", line 217, in \_count\_physical\_cores  
raise ValueError(

```

[33]: df_without_standardization = pd.DataFrame(data=first_list, \
    ↪ columns=["Correlation threshold"])
df_without_standardization['Training data R^2 score'] = second_list
df_without_standardization['Test data R^2 score'] = third_list
df_without_standardization['Training RMSE'] = fourth_l
df_without_standardization['Test RMSE'] = fifth_l
df_without_standardization['Number of features'] = f_list

```

```

[34]: df_k_nearest = df_without_standardization.copy()
df_without_standardization

```

```

[34]: Correlation threshold  Training data R^2 score  Test data R^2 score  \
0          0.33          0.593520          0.003552
1          0.34          0.593520          0.003552
2          0.35          0.648241          0.088554
3          0.36          0.648241          0.088554
4          0.37          0.662743          0.186736

```

|    |      |          |          |
|----|------|----------|----------|
| 5  | 0.38 | 0.617782 | 0.248856 |
| 6  | 0.39 | 0.578109 | 0.161662 |
| 7  | 0.40 | 0.615540 | 0.139525 |
| 8  | 0.41 | 0.615540 | 0.139525 |
| 9  | 0.42 | 0.618519 | 0.251357 |
| 10 | 0.43 | 0.623715 | 0.254735 |
| 11 | 0.44 | 0.623715 | 0.254735 |
| 12 | 0.45 | 0.617540 | 0.179787 |
| 13 | 0.46 | 0.626009 | 0.099528 |
| 14 | 0.47 | 0.612948 | 0.136080 |
| 15 | 0.48 | 0.580521 | 0.208204 |
| 16 | 0.49 | 0.572742 | 0.212558 |
| 17 | 0.50 | 0.572742 | 0.212558 |
| 18 | 0.51 | 0.568965 | 0.147240 |
| 19 | 0.52 | 0.568965 | 0.147240 |
| 20 | 0.53 | 0.535698 | 0.175973 |
| 21 | 0.54 | 0.535698 | 0.175973 |

|    | Training RMSE | Test RMSE | Number of features |
|----|---------------|-----------|--------------------|
| 0  | 0.568182      | 0.918775  | 63                 |
| 1  | 0.568182      | 0.918775  | 57                 |
| 2  | 0.528555      | 0.878714  | 52                 |
| 3  | 0.528555      | 0.878714  | 47                 |
| 4  | 0.517545      | 0.830038  | 39                 |
| 5  | 0.550964      | 0.797708  | 35                 |
| 6  | 0.578852      | 0.842736  | 27                 |
| 7  | 0.552577      | 0.853790  | 22                 |
| 8  | 0.552577      | 0.853790  | 21                 |
| 9  | 0.550432      | 0.796378  | 18                 |
| 10 | 0.546671      | 0.794580  | 17                 |
| 11 | 0.546671      | 0.794580  | 17                 |
| 12 | 0.551138      | 0.833577  | 14                 |
| 13 | 0.545002      | 0.873408  | 10                 |
| 14 | 0.554437      | 0.855497  | 7                  |
| 15 | 0.577195      | 0.819009  | 6                  |
| 16 | 0.582522      | 0.816754  | 5                  |
| 17 | 0.582522      | 0.816754  | 5                  |
| 18 | 0.585092      | 0.849954  | 3                  |
| 19 | 0.585092      | 0.849954  | 3                  |
| 20 | 0.607250      | 0.835512  | 2                  |
| 21 | 0.607250      | 0.835512  | 2                  |

## 4.2 Plots

```
[35]: plt.plot(df_without_standardization['Correlation threshold'],  
             df_without_standardization['Training data R^2 score'], label = "Training_  
             data R^2 score", marker='v')  
plt.plot(df_without_standardization['Correlation threshold'],  
         df_without_standardization['Test data R^2 score'], label = "Test data R^2_  
         score", marker='D')  
plt.legend()  
plt.xlabel('Correlation threshold')  
plt.ylabel('R^2 score')  
plt.ylim([0, 1])  
plt.show()
```

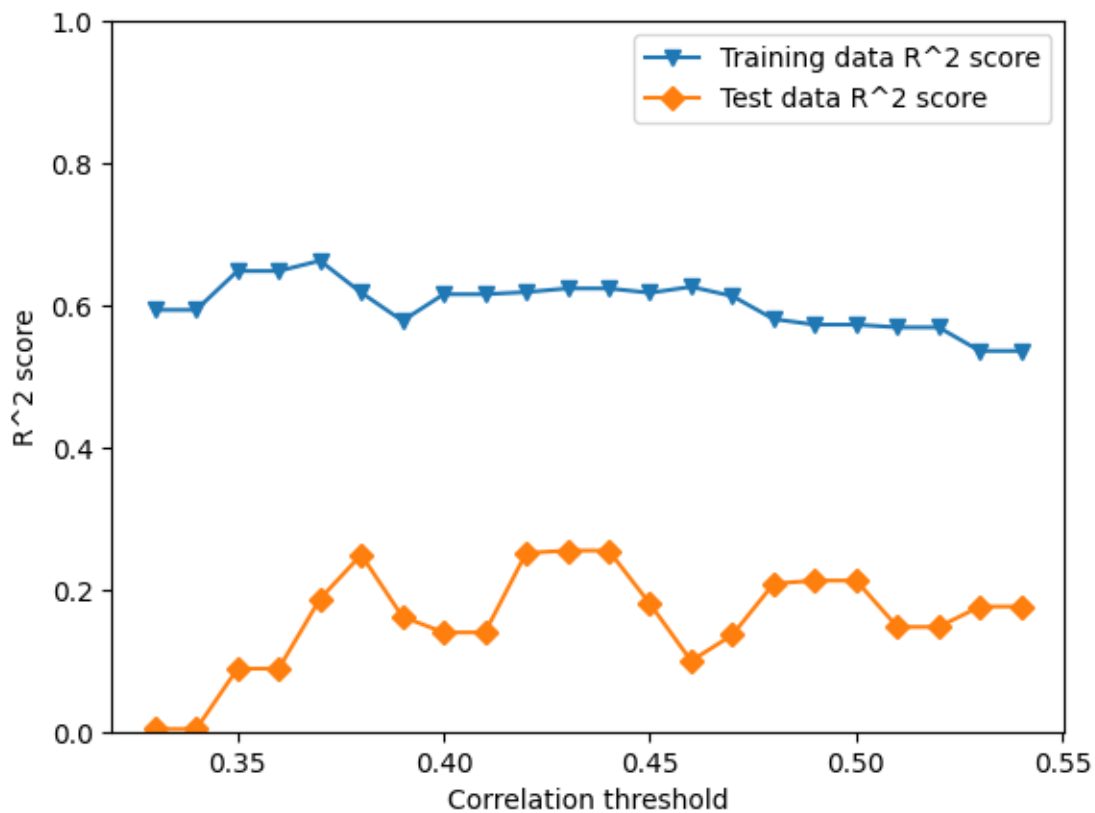

```
[36]: plt.plot(df_without_standardization['Correlation threshold'],  
             df_without_standardization['Number of features'], label = "Number of_  
             features", marker='.')  
plt.legend()  
plt.xlabel('Correlation threshold')  
plt.ylabel('Number of features')  
plt.show()
```





[ ]:

## 5 Support Vector Machines (SVM)

```
[37]: without_standardization, train_r2_, test_r2_, hist1, hist2, target_column_name,
      ↪ training_data_RMSE, test_data_RMSE = pred_model.
      ↪ prepare_data_and_create_model(molecular_descriptors_df=data,
      ↪
      ↪         correlation_threshold=0.50,
      ↪
      ↪         standardization=False,
      ↪
      ↪         model_type='SVR',
      ↪
      ↪         kernel_ = 'linear',
      ↪
      ↪         gamma_ = 'auto',
      ↪
      ↪         target_column_name = target,
```

```

↪          random_state=random_state,
↪          train_test_split_=True,
↪          verbose=True)

```

I am not doing standardization...

|   | molecular descriptor name |  |
|---|---------------------------|--|
| 0 | AATSOZ                    |  |
| 1 | AATSOare                  |  |
| 2 | AATSOd                    |  |
| 3 | AATSOdv                   |  |
| 4 | AATSOi                    |  |

  

|   | molecular descriptor name | corr_value |
|---|---------------------------|------------|
| 0 | AATSOZ                    | -0.027037  |
| 1 | AATSOare                  | -0.129823  |
| 2 | AATSOd                    | 0.042740   |
| 3 | AATSOdv                   | -0.120173  |
| 4 | AATSOi                    | 0.132395   |

  

|   | molecular descriptor name | corr_value | absolute correlation value |
|---|---------------------------|------------|----------------------------|
| 0 | AATSOZ                    | -0.027037  | 0.027037                   |
| 1 | AATSOare                  | -0.129823  | 0.129823                   |
| 2 | AATSOd                    | 0.042740   | 0.042740                   |
| 3 | AATSOdv                   | -0.120173  | 0.120173                   |
| 4 | AATSOi                    | 0.132395   | 0.132395                   |

  

|      | molecular descriptor name | corr_value | absolute correlation value |
|------|---------------------------|------------|----------------------------|
| 226  | AMID_0                    | -0.524157  | 0.524157                   |
| 505  | EState_VSA5               | -0.579664  | 0.579664                   |
| 791  | MDEO-12                   | -0.558727  | 0.558727                   |
| 851  | NdssC                     | -0.506855  | 0.506855                   |
| 1091 | VSA_EState5               | 0.503578   | 0.503578                   |

  

|      | molecular descriptor name | corr_value | absolute correlation value |
|------|---------------------------|------------|----------------------------|
| 226  | AMID_0                    | -0.524157  | 0.524157                   |
| 505  | EState_VSA5               | -0.579664  | 0.579664                   |
| 791  | MDEO-12                   | -0.558727  | 0.558727                   |
| 851  | NdssC                     | -0.506855  | 0.506855                   |
| 1091 | VSA_EState5               | 0.503578   | 0.503578                   |

The model used is: SVR...

Return the coefficient of determination of the prediction:

0.29235327296971636

R<sup>2</sup> score: 0.4921032692822115

Correlation coefficient: 0.7015007265015565

Test data - unseen during training:

R<sup>2</sup> score: 0.29235327296971636

Correlation coefficient: 0.5406970251163921

[8.18453538 8.23239603 7.67600691 7.38657623 6.3760783 7.69978402

```

7.83363999 7.82458324 8.17426745 7.94287493 7.74643631 6.94494391
7.94177595 6.49276778 7.48384123 8.18609783 7.94631176 7.95017326]
44      8.508638
47      7.920819
4       7.277366
55      7.920819
26      5.208801
64      8.327902
73      7.886057
10      8.102373
40      8.050610
107     8.017729
18      7.140261
62      8.657577
11      8.107905
36      7.017729
89      8.638272
91      10.000000
109     7.886057
0       8.187087

```

Name: LoVo, dtype: float64

Training Root Mean Square Error: 0.6351191535957598

Testing Root Mean Square Error: 0.7742661588653977

```
[38]: print(target_column_name+str('_transformed'))
      print(hist1[target_column_name].hist())
```

LoVo\_transformed

AxesSubplot(0.125,0.11;0.775x0.77)



```
[39]: with_standardization, train_r2_, test_r2_, hist1, hist2, target_column_name,
      ↪ training_data_RMSE, test_data_RMSE = pred_model.
      ↪ prepare_data_and_create_model(molecular_descriptors_df=data,
      ↪
      ↪         correlation_threshold=0.50,
      ↪
      ↪         standardization=True,
      ↪
      ↪         model_type='SVR',
      ↪
      ↪         kernel_ = 'linear',
      ↪
      ↪         gamma_ = 'auto',
      ↪
      ↪         target_column_name = target,
      ↪
      ↪         random_state=random_state,
      ↪
      ↪         train_test_split_=True,
      ↪
      ↪         verbose=True)
```

I am doing standardization...

molecular descriptor name

|   |          |
|---|----------|
| 0 | AATSOZ   |
| 1 | AATSOare |
| 2 | AATSOd   |
| 3 | AATSOdv  |
| 4 | AATSOi   |

|   | molecular descriptor name | corr_value |
|---|---------------------------|------------|
| 0 | AATSOZ                    | -0.027037  |
| 1 | AATSOare                  | -0.129823  |
| 2 | AATSOd                    | 0.042740   |
| 3 | AATSOdv                   | -0.120173  |
| 4 | AATSOi                    | 0.132395   |

|   | molecular descriptor name | corr_value | absolute correlation value |
|---|---------------------------|------------|----------------------------|
| 0 | AATSOZ                    | -0.027037  | 0.027037                   |
| 1 | AATSOare                  | -0.129823  | 0.129823                   |
| 2 | AATSOd                    | 0.042740   | 0.042740                   |
| 3 | AATSOdv                   | -0.120173  | 0.120173                   |
| 4 | AATSOi                    | 0.132395   | 0.132395                   |

|      | molecular descriptor name | corr_value | absolute correlation value |
|------|---------------------------|------------|----------------------------|
| 226  | AMID_0                    | -0.524157  | 0.524157                   |
| 505  | EState_VSA5               | -0.579664  | 0.579664                   |
| 791  | MDEO-12                   | -0.558727  | 0.558727                   |
| 851  | NdssC                     | -0.506855  | 0.506855                   |
| 1091 | VSA_EState5               | 0.503578   | 0.503578                   |

|      | molecular descriptor name | corr_value | absolute correlation value |
|------|---------------------------|------------|----------------------------|
| 226  | AMID_0                    | -0.524157  | 0.524157                   |
| 505  | EState_VSA5               | -0.579664  | 0.579664                   |
| 791  | MDEO-12                   | -0.558727  | 0.558727                   |
| 851  | NdssC                     | -0.506855  | 0.506855                   |
| 1091 | VSA_EState5               | 0.503578   | 0.503578                   |

The model used is: SVR...

Return the coefficient of determination of the prediction:

0.29235327296971636

R<sup>2</sup> score: 0.4921032692822115

Correlation coefficient: 0.7015007265015565

Test data - unseen during training:

R<sup>2</sup> score: 0.29235327296971636

Correlation coefficient: 0.5406970251163921

[8.18453538 8.23239603 7.67600691 7.38657623 6.3760783 7.69978402  
7.83363999 7.82458324 8.17426745 7.94287493 7.74643631 6.94494391  
7.94177595 6.49276778 7.48384123 8.18609783 7.94631176 7.95017326]

|    |          |
|----|----------|
| 44 | 8.508638 |
| 47 | 7.920819 |
| 4  | 7.277366 |
| 55 | 7.920819 |
| 26 | 5.208801 |
| 64 | 8.327902 |

|     |           |
|-----|-----------|
| 73  | 7.886057  |
| 10  | 8.102373  |
| 40  | 8.050610  |
| 107 | 8.017729  |
| 18  | 7.140261  |
| 62  | 8.657577  |
| 11  | 8.107905  |
| 36  | 7.017729  |
| 89  | 8.638272  |
| 91  | 10.000000 |
| 109 | 7.886057  |
| 0   | 8.187087  |

Name: LoVo, dtype: float64

Training Root Mean Square Error: 0.6351191535957598

Testing Root Mean Square Error: 0.7742661588653977

## 5.1 Search inside correlation space

```
[40]: step = 0.01
initial_step = corr_low
last_step = corr_high
first_list = [x / 100.0 for x in range(int(initial_step*100),
    ↪int(last_step*100), int(step*100))]
second_list = []
third_list = []
fourth_l = []
fifth_l = []
f_list = []
for i in first_list:
    without_standardization, train_r2, test_r2, _, h_, target_column_name,
    ↪training_data_RMSE, test_data_RMSE = pred_model.
    ↪prepare_data_and_create_model(molecular_descriptors_df = data,

    ↪
        correlation_threshold = i,

    ↪
        standardization = False,

    ↪
        model_type = 'SVR',

    ↪
        kernel_ = 'linear',

    ↪
        gamma_ = 'auto',

    ↪
        target_column_name = target,

    ↪
        random_state=random_state,
```

```

    ↪          train_test_split_ = True,

    ↪          verbose = False)
    second_list.append(train_r2)
    third_list.append(test_r2)
    fourth_l.append(training_data_RMSE)
    fifth_l.append(test_data_RMSE)
    f_list.append(len(h_))

```

```

[41]: df_without_standardization = pd.DataFrame(data=first_list,
    ↪      columns=["Correlation threshold"])
df_without_standardization['Training data R^2 score'] = second_list
df_without_standardization['Test data R^2 score'] = third_list
df_without_standardization['Training RMSE'] = fourth_l
df_without_standardization['Test RMSE'] = fifth_l
df_without_standardization['Number of features'] = f_list

```

```

[42]: df_svm = df_without_standardization.copy()
df_without_standardization

```

```

[42]:
Correlation threshold  Training data R^2 score  Test data R^2 score  \
0                    0.33                0.637913          0.404687
1                    0.34                0.636394          0.344376
2                    0.35                0.622530          0.504512
3                    0.36                0.632914          0.500235
4                    0.37                0.605979          0.403215
5                    0.38                0.603589          0.404943
6                    0.39                0.587512          0.429481
7                    0.40                0.555427          0.215861
8                    0.41                0.555160          0.214816
9                    0.42                0.565297          0.318582
10                   0.43                0.564830          0.317756
11                   0.44                0.564830          0.317756
12                   0.45                0.551738          0.321373
13                   0.46                0.538088          0.283675
14                   0.47                0.492210          0.290894
15                   0.48                0.492340          0.293198
16                   0.49                0.492103          0.292353
17                   0.50                0.492103          0.292353
18                   0.51                0.462275          0.366926
19                   0.52                0.462275          0.366926
20                   0.53                0.461516          0.367015
21                   0.54                0.461516          0.367015

Training RMSE  Test RMSE  Number of features
0          0.536258    0.710157                63

```

|    |          |          |    |
|----|----------|----------|----|
| 1  | 0.537382 | 0.745263 | 57 |
| 2  | 0.547531 | 0.647886 | 52 |
| 3  | 0.539947 | 0.650676 | 47 |
| 4  | 0.559406 | 0.711035 | 39 |
| 5  | 0.561100 | 0.710005 | 35 |
| 6  | 0.572365 | 0.695212 | 27 |
| 7  | 0.594209 | 0.815039 | 22 |
| 8  | 0.594387 | 0.815582 | 21 |
| 9  | 0.587576 | 0.759782 | 18 |
| 10 | 0.587891 | 0.760242 | 17 |
| 11 | 0.587891 | 0.760242 | 17 |
| 12 | 0.596669 | 0.758224 | 14 |
| 13 | 0.605685 | 0.778999 | 10 |
| 14 | 0.635052 | 0.775064 | 7  |
| 15 | 0.634971 | 0.773804 | 6  |
| 16 | 0.635119 | 0.774266 | 5  |
| 17 | 0.635119 | 0.774266 | 5  |
| 18 | 0.653503 | 0.732334 | 3  |
| 19 | 0.653503 | 0.732334 | 3  |
| 20 | 0.653964 | 0.732283 | 2  |
| 21 | 0.653964 | 0.732283 | 2  |

## 5.2 Plots

```
[43]: plt.plot(df_without_standardization['Correlation threshold'],
             df_without_standardization['Training data R^2 score'], label = "Training
             data R^2 score", marker='v')
plt.plot(df_without_standardization['Correlation threshold'],
             df_without_standardization['Test data R^2 score'], label = "Test data R^2
             score", marker='D')
plt.legend()
plt.xlabel('Correlation threshold')
plt.ylabel('R^2 score')
plt.ylim([0, 1])
plt.show()
```



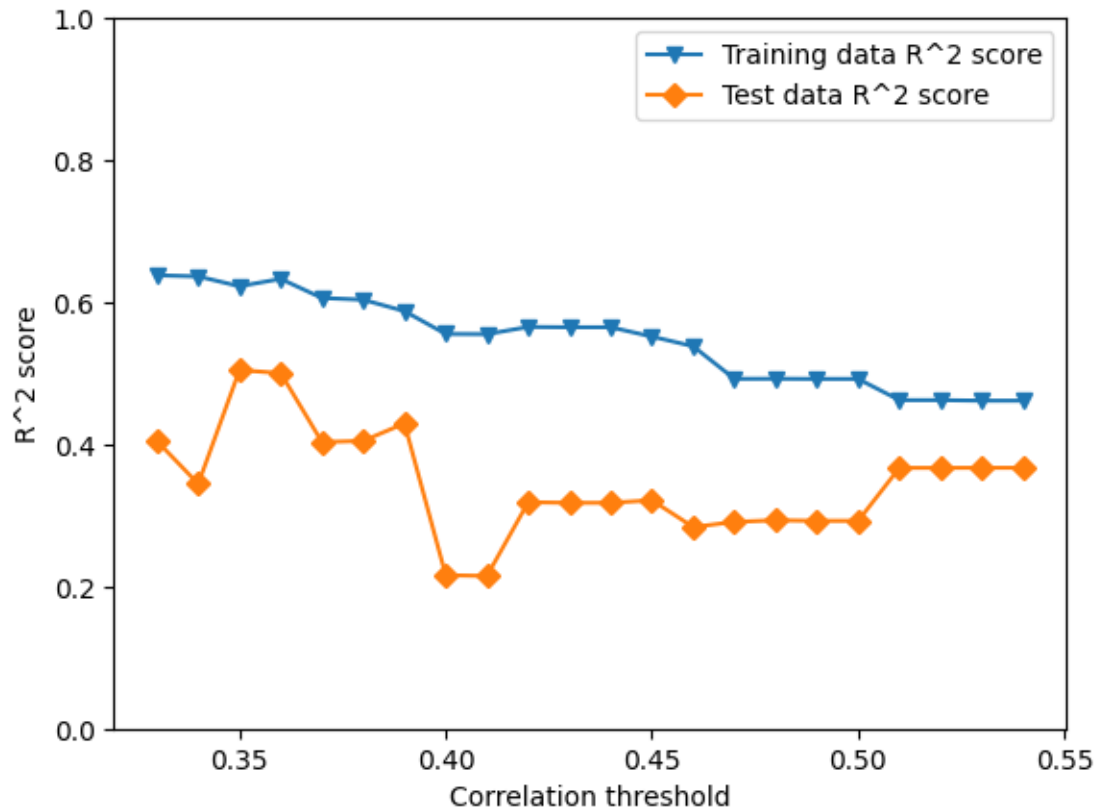

```
[44]: plt.plot(df_without_standardization['Correlation threshold'],  
             df_without_standardization['Number of features'], label = "Number of  
             features", marker='.')  
plt.legend()  
plt.xlabel('Correlation threshold')  
plt.ylabel('Number of features')  
plt.show()
```



### 5.3 Store quality measurements

```
[45]: with pd.ExcelWriter('../Data/Quality_'+str(target)+'_'+str(random_state)+'_'.  
      ↪xlsx') as writer:  
      df_linear.to_excel(writer, sheet_name='MLR')  
      df_decision_tree.to_excel(writer, sheet_name='DT')  
      df_random_forest.to_excel(writer, sheet_name='RF')  
      df_k_nearest.to_excel(writer, sheet_name='KNN')  
      df_svm.to_excel(writer, sheet_name='SVM')
```

# Notebook

January 18, 2024

## 1 File 27

```
[1]: import sys
from pathlib import Path
prediction_mode_path = Path("../module")
sys.path.append(prediction_mode_path.as_posix())
import models_creation as pred_model

import pandas as pd
import numpy as np

from sklearn.metrics import r2_score

import matplotlib.pyplot as plt
from sklearn.tree import plot_tree

from matplotlib import pyplot as plt

import joblib

import warnings
warnings.filterwarnings('ignore')
```

```
[2]: load_prepared_data = pd.read_excel('../Data/Kolchicyna_machine_learning.xlsx')
load_prepared_data = load_prepared_data.drop(columns=['Unnamed: 0'])

target = 'MCF-7'

corr_low = 0.33
corr_high = 0.525

random_state = 15
```

```
[3]: load_prepared_data.head()
```

```
[3]:
```

|   | AATSOZ    | AATSOare | AATSOd   | AATSOdv  | AATSOi     | AATSOm    | AATSOp   | \ |
|---|-----------|----------|----------|----------|------------|-----------|----------|---|
| 0 | 25.090909 | 6.046518 | 3.109091 | 6.662626 | 160.775045 | 99.075564 | 1.555512 |   |
| 1 | 24.448276 | 6.008422 | 3.051724 | 6.386973 | 161.021674 | 96.473315 | 1.538471 |   |

|   |           |          |          |          |            |           |          |
|---|-----------|----------|----------|----------|------------|-----------|----------|
| 2 | 23.868852 | 5.974074 | 3.000000 | 6.138434 | 161.244045 | 94.127025 | 1.523105 |
| 3 | 23.868852 | 5.974074 | 3.032787 | 6.171220 | 161.244045 | 94.127025 | 1.523105 |
| 4 | 23.343750 | 5.942945 | 2.953125 | 5.913194 | 161.445569 | 92.000700 | 1.509180 |

|   | AATS0pe  | AATS0s   | AATS0se  | ... | A549_float | MCF-7_float | LoVo_float | \ |
|---|----------|----------|----------|-----|------------|-------------|------------|---|
| 0 | 6.126680 | 3.435416 | 7.629859 | ... | 10.8       | 10.3        | 6.5        |   |
| 1 | 6.088791 | 3.330998 | 7.596891 | ... | 11.6       | 12.0        | 8.5        |   |
| 2 | 6.054630 | 3.236850 | 7.567166 | ... | 10.9       | 12.2        | 8.8        |   |
| 3 | 6.054630 | 3.257798 | 7.567166 | ... | 10.5       | 11.3        | 8.5        |   |
| 4 | 6.023670 | 3.151529 | 7.540228 | ... | 89.5       | 92.7        | 52.8       |   |

|   | LoVo/DX_float | BALB/3T3_float | A549_float_transformed | \ |
|---|---------------|----------------|------------------------|---|
| 0 | 54.9          | 10.2           | 7.966576               |   |
| 1 | 31.1          | 14.3           | 7.935542               |   |
| 2 | 17.9          | 11.7           | 7.962574               |   |
| 3 | 10.2          | 11.0           | 7.978811               |   |
| 4 | 77.8          | 99.4           | 7.048177               |   |

|   | MCF-7_float_transformed | LoVo_float_transformed | LoVo/DX_float_transformed | \ |
|---|-------------------------|------------------------|---------------------------|---|
| 0 | 7.987163                | 8.187087               | 7.260428                  |   |
| 1 | 7.920819                | 8.070581               | 7.507240                  |   |
| 2 | 7.913640                | 8.055517               | 7.747147                  |   |
| 3 | 7.946922                | 8.070581               | 7.991400                  |   |
| 4 | 7.032920                | 7.277366               | 7.109020                  |   |

|   | BALB/3T3_float_transformed |
|---|----------------------------|
| 0 | 7.991400                   |
| 1 | 7.844664                   |
| 2 | 7.931814                   |
| 3 | 7.958607                   |
| 4 | 7.002614                   |

[5 rows x 1221 columns]

```
[4]: data = load_prepared_data[list(load_prepared_data.columns)[0:-10]]
data[target] = load_prepared_data[load_prepared_data.columns[-4]]
data.head()
```

|   | AATS0Z    | AATS0are | AATS0d   | AATS0dv  | AATS0i     | AATS0m    | AATS0p   | \ |
|---|-----------|----------|----------|----------|------------|-----------|----------|---|
| 0 | 25.090909 | 6.046518 | 3.109091 | 6.662626 | 160.775045 | 99.075564 | 1.555512 |   |
| 1 | 24.448276 | 6.008422 | 3.051724 | 6.386973 | 161.021674 | 96.473315 | 1.538471 |   |
| 2 | 23.868852 | 5.974074 | 3.000000 | 6.138434 | 161.244045 | 94.127025 | 1.523105 |   |
| 3 | 23.868852 | 5.974074 | 3.032787 | 6.171220 | 161.244045 | 94.127025 | 1.523105 |   |
| 4 | 23.343750 | 5.942945 | 2.953125 | 5.913194 | 161.445569 | 92.000700 | 1.509180 |   |

|   | AATS0pe  | AATS0s   | AATS0se  | ... | piPC10   | piPC2    | piPC3    | piPC4    | \ |
|---|----------|----------|----------|-----|----------|----------|----------|----------|---|
| 0 | 6.126680 | 3.435416 | 7.629859 | ... | 7.999655 | 4.266195 | 4.915408 | 5.516700 |   |

|   |          |          |          |     |          |          |          |          |
|---|----------|----------|----------|-----|----------|----------|----------|----------|
| 1 | 6.088791 | 3.330998 | 7.596891 | ... | 8.018726 | 4.280132 | 4.922714 | 5.520711 |
| 2 | 6.054630 | 3.236850 | 7.567166 | ... | 8.028799 | 4.293878 | 4.929967 | 5.524706 |
| 3 | 6.054630 | 3.257798 | 7.567166 | ... | 8.037440 | 4.307438 | 4.929967 | 5.524706 |
| 4 | 6.023670 | 3.151529 | 7.540228 | ... | 8.034892 | 4.307438 | 4.937168 | 5.528685 |

|   | piPC5    | piPC6    | piPC7    | piPC8    | piPC9    | MCF-7    |
|---|----------|----------|----------|----------|----------|----------|
| 0 | 6.098566 | 6.595759 | 6.979116 | 7.337313 | 7.681445 | 7.987163 |
| 1 | 6.103048 | 6.601209 | 6.985613 | 7.349442 | 7.695531 | 7.920819 |
| 2 | 6.105281 | 6.603923 | 6.989306 | 7.353932 | 7.704023 | 7.913640 |
| 3 | 6.107510 | 6.606629 | 6.992068 | 7.361425 | 7.709420 | 7.946922 |
| 4 | 6.107510 | 6.605277 | 6.991148 | 7.356489 | 7.707175 | 7.032920 |

[5 rows x 1212 columns]

## 2 Multiple Linear regression (MLR)

```
[5]: without_standardization, train_r2_, test_r2_, hist1, hist2, target_column_name,
      ↪ training_data_RMSE, test_data_RMSE = pred_model.
      ↪ prepare_data_and_create_model(molecular_descriptors_df=data,
      ↪
      ↪ correlation_threshold=0.5,
      ↪
      ↪ standardization=False,
      ↪
      ↪ model_type='linear_model',
      ↪
      ↪ target_column_name = str(target),
      ↪
      ↪ random_state=random_state,
      ↪
      ↪ train_test_split_=True,
      ↪
      ↪ verbose=True)
```

I am not doing standardization...

|   | molecular descriptor name |            |
|---|---------------------------|------------|
| 0 | AATS0Z                    |            |
| 1 | AATS0are                  |            |
| 2 | AATS0d                    |            |
| 3 | AATS0dv                   |            |
| 4 | AATS0i                    |            |
|   | molecular descriptor name | corr_value |
| 0 | AATS0Z                    | -0.038502  |
| 1 | AATS0are                  | -0.120847  |
| 2 | AATS0d                    | 0.041648   |
| 3 | AATS0dv                   | -0.115899  |

|      |                           |            |                            |
|------|---------------------------|------------|----------------------------|
| 4    | AATSOi                    | 0.191765   |                            |
|      | molecular descriptor name | corr_value | absolute correlation value |
| 0    | AATSOZ                    | -0.038502  | 0.038502                   |
| 1    | AATSOare                  | -0.120847  | 0.120847                   |
| 2    | AATSOd                    | 0.041648   | 0.041648                   |
| 3    | AATSOdv                   | -0.115899  | 0.115899                   |
| 4    | AATSOi                    | 0.191765   | 0.191765                   |
|      | molecular descriptor name | corr_value | absolute correlation value |
| 226  | AMID_0                    | -0.520578  | 0.520578                   |
| 505  | EState_VSA5               | -0.578904  | 0.578904                   |
| 506  | EState_VSA6               | 0.519794   | 0.519794                   |
| 791  | MDEO-12                   | -0.525441  | 0.525441                   |
| 1211 | MCF-7                     | 1.000000   | 1.000000                   |
|      | molecular descriptor name | corr_value | absolute correlation value |
| 226  | AMID_0                    | -0.520578  | 0.520578                   |
| 505  | EState_VSA5               | -0.578904  | 0.578904                   |
| 506  | EState_VSA6               | 0.519794   | 0.519794                   |
| 791  | MDEO-12                   | -0.525441  | 0.525441                   |

The model used is: LinearReg..

Return the coefficient of determination of the prediction:  
0.6355287275624781

R<sup>2</sup> score: 0.4907381530827223

Correlation coefficient: 0.7005270537835939

Test data - unseen during training:  
R<sup>2</sup> score: 0.6355287275624781

Correlation coefficient: 0.7972005566747167

[7.74208566 5.90539287 7.24041213 8.06935086 7.94619102 8.0188816  
7.92716129 7.61131341 7.94011305 8.11595796 7.31547916 8.37382755  
7.78046818 8.34838516 7.88293042 7.89304006 6.60782536 5.21892825]

102 7.958607  
38 6.022276  
8 5.949079  
109 8.086186  
11 8.013228  
51 8.000000  
88 8.119186  
21 8.113509  
82 7.982967  
98 7.795880  
58 7.677781  
64 8.619789  
74 8.327902  
103 8.376751  
91 9.154902  
43 7.958607  
25 4.949659  
30 6.010550

Name: MCF-7, dtype: float64

Training Root Mean Square Error: 0.6639506858888914

Testing Root Mean Square Error: 0.6505219513902984

```
[6]: print(target_column_name+str('_transformed'))  
     print(hist1[target_column_name].hist())
```

MCF-7\_transformed

AxesSubplot(0.125,0.11;0.775x0.77)

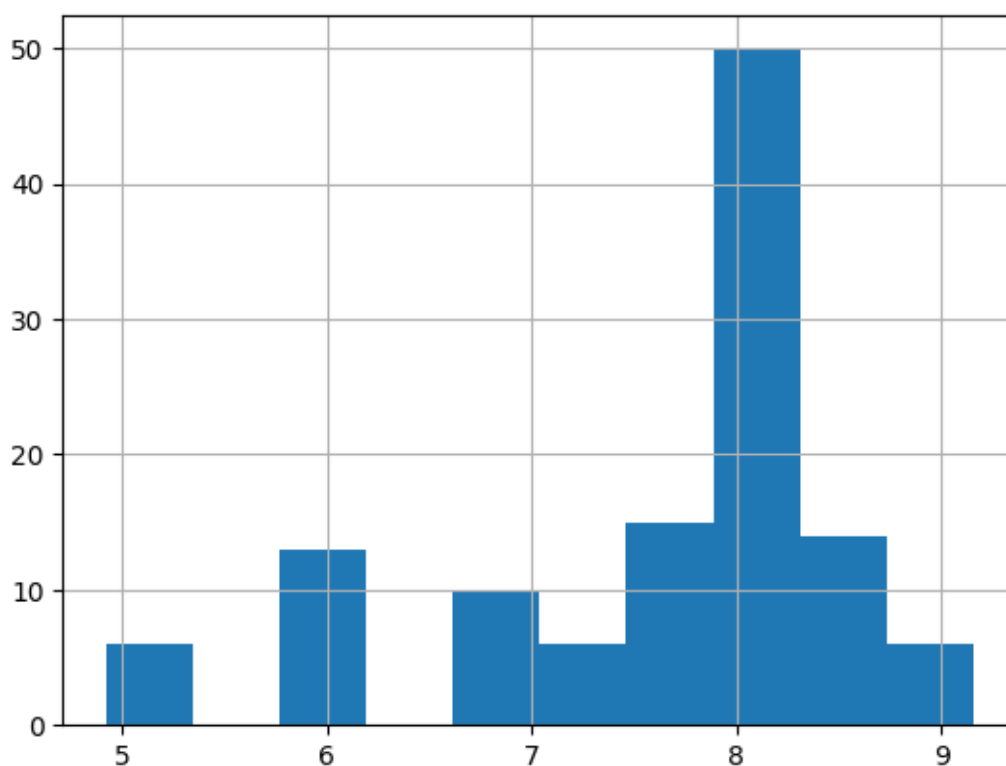

```
[7]: with_standardization, train_r2_, test_r2_, hist1, hist2, target_column_name,   
      ↪ training_data_RMSE, test_data_RMSE = pred_model.  
      ↪ prepare_data_and_create_model(molecular_descriptors_df=data,  
  
      ↪ correlation_threshold=0.50,  
  
      ↪ standardization=True,  
  
      ↪ model_type='linear_model',  
  
      ↪ target_column_name = target,  
  
      ↪ random_state=random_state,
```

```

↪          train_test_split_=True,
↪          verbose=True)

```

I am doing standardization...

|   | molecular descriptor name | corr_value | absolute correlation value |
|---|---------------------------|------------|----------------------------|
| 0 | AATSOZ                    | -0.038502  | 0.038502                   |
| 1 | AATSOare                  | -0.120847  | 0.120847                   |
| 2 | AATSOd                    | 0.041648   | 0.041648                   |
| 3 | AATSOdv                   | -0.115899  | 0.115899                   |
| 4 | AATSOi                    | 0.191765   | 0.191765                   |

  

|      | molecular descriptor name | corr_value | absolute correlation value |
|------|---------------------------|------------|----------------------------|
| 226  | AMID_0                    | -0.520578  | 0.520578                   |
| 505  | EState_VSA5               | -0.578904  | 0.578904                   |
| 506  | EState_VSA6               | 0.519794   | 0.519794                   |
| 791  | MDEO-12                   | -0.525441  | 0.525441                   |
| 1211 | MCF-7                     | 1.000000   | 1.000000                   |

  

|     | molecular descriptor name | corr_value | absolute correlation value |
|-----|---------------------------|------------|----------------------------|
| 226 | AMID_0                    | -0.520578  | 0.520578                   |
| 505 | EState_VSA5               | -0.578904  | 0.578904                   |
| 506 | EState_VSA6               | 0.519794   | 0.519794                   |
| 791 | MDEO-12                   | -0.525441  | 0.525441                   |

The model used is: LinearReg..

Return the coefficient of determination of the prediction:

0.6355287275624781

R<sup>2</sup> score: 0.4907381530827223

Correlation coefficient: 0.7005270537835939

Test data - unseen during training:

R<sup>2</sup> score: 0.6355287275624781

Correlation coefficient: 0.7972005566747167

[7.74208566 5.90539287 7.24041213 8.06935086 7.94619102 8.0188816  
7.92716129 7.61131341 7.94011305 8.11595796 7.31547916 8.37382755  
7.78046818 8.34838516 7.88293042 7.89304006 6.60782536 5.21892825]  
102 7.958607  
38 6.022276



```

8      5.949079
109    8.086186
11     8.013228
51     8.000000
88     8.119186
21     8.113509
82     7.982967
98     7.795880
58     7.677781
64     8.619789
74     8.327902
103    8.376751
91     9.154902
43     7.958607
25     4.949659
30     6.010550

```

Name: MCF-7, dtype: float64

Training Root Mean Square Error: 0.6639506858888914

Testing Root Mean Square Error: 0.6505219513902984

## 2.1 Search inside correlation space

```

[8]: step = 0.01
initial_step = corr_low
last_step = corr_high
first_list = [x / 100.0 for x in range(int(initial_step*100),
    ↪int(last_step*100), int(step*100))]
second_list = []
third_list = []
fourth_l = []
fifth_l = []
f_list = []
for i in first_list:
    without_standardization, train_r2, test_r2, _, h_, target_column_name,
    ↪training_data_RMSE, test_data_RMSE = pred_model.
    ↪prepare_data_and_create_model(molecular_descriptors_df = data,

    ↪                                correlation_threshold = i,

    ↪                                standardization = False,

    ↪                                model_type = 'linear_model',

    ↪                                target_column_name = target,

    ↪                                random_state=random_state,

```

```

    train_test_split_ = True,

    verbose = False)
second_list.append(train_r2)
third_list.append(test_r2)
fourth_l.append(training_data_RMSE)
fifth_l.append(test_data_RMSE)
f_list.append(len(h_))

```

```

[9]: df_without_standardization = pd.DataFrame(data=first_list,
    columns=["Correlation threshold"])
df_without_standardization['Training data R^2 score'] = second_list
df_without_standardization['Test data R^2 score'] = third_list
df_without_standardization['Training RMSE'] = fourth_l
df_without_standardization['Test RMSE'] = fifth_l
df_without_standardization['Number of features'] = f_list

```

```

[10]: df_linear = df_without_standardization.copy()
df_without_standardization

```

```

[10]:
Correlation threshold  Training data R^2 score  Test data R^2 score \
0                    0.33                0.978516          -0.094412
1                    0.34                0.957841           0.477894
2                    0.35                0.929150           0.168513
3                    0.36                0.875844           0.523529
4                    0.37                0.807568           0.617056
5                    0.38                0.777231           0.661517
6                    0.39                0.685249           0.746559
7                    0.40                0.657338           0.712357
8                    0.41                0.657259           0.714074
9                    0.42                0.635363           0.677386
10                   0.43                0.550125           0.694509
11                   0.44                0.549982           0.690317
12                   0.45                0.546381           0.690199
13                   0.46                0.528483           0.659053
14                   0.47                0.527007           0.647292
15                   0.48                0.515703           0.646798
16                   0.49                0.510924           0.637683
17                   0.50                0.490738           0.635529
18                   0.51                0.490738           0.635529

Training RMSE  Test RMSE  Number of features
0          0.136373    1.127251              84
1          0.191034    0.778591              74
2          0.247648    0.982558              61
3          0.327831    0.743787              50

```

|    |          |          |    |
|----|----------|----------|----|
| 4  | 0.408135 | 0.666803 | 43 |
| 5  | 0.439130 | 0.626901 | 37 |
| 6  | 0.521974 | 0.542462 | 29 |
| 7  | 0.544625 | 0.577906 | 26 |
| 8  | 0.544689 | 0.576179 | 25 |
| 9  | 0.561818 | 0.612029 | 19 |
| 10 | 0.624038 | 0.595566 | 14 |
| 11 | 0.624138 | 0.599638 | 13 |
| 12 | 0.626630 | 0.599752 | 11 |
| 13 | 0.638872 | 0.629178 | 10 |
| 14 | 0.639871 | 0.639938 | 9  |
| 15 | 0.647472 | 0.640386 | 8  |
| 16 | 0.650659 | 0.648596 | 6  |
| 17 | 0.663951 | 0.650522 | 4  |
| 18 | 0.663951 | 0.650522 | 4  |

[ ]:

## 2.2 Plots

```
[11]: plt.plot(df_without_standardization['Correlation threshold'],
    ↪df_without_standardization['Training data R^2 score'], label = "Training_
    ↪data R^2 score", marker='v')
plt.plot(df_without_standardization['Correlation threshold'],
    ↪df_without_standardization['Test data R^2 score'], label = "Test data R^2_
    ↪score", marker='D')
plt.legend()
plt.xlabel('Correlation threshold')
plt.ylabel('R^2 score')
plt.ylim([0, 1])
plt.show()
```

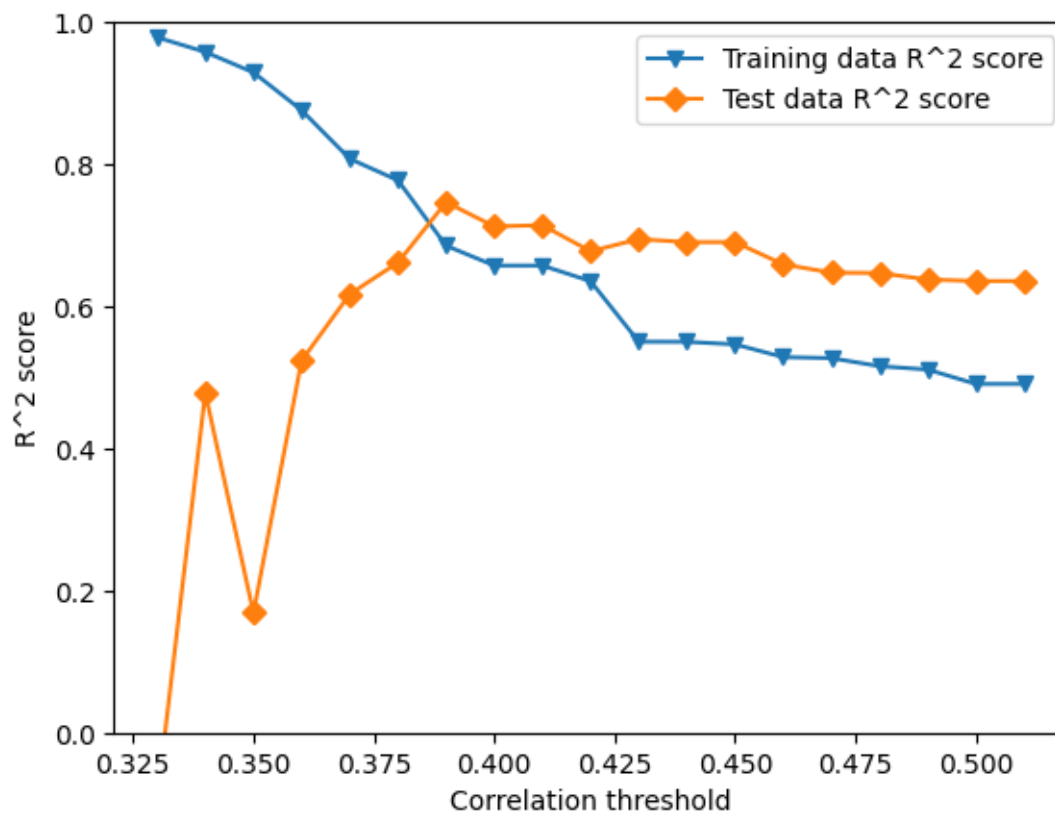

```
[12]: plt.plot(df_without_standardization['Correlation threshold'],  
             df_without_standardization['Number of features'], label = "Number of  
             features", marker='.')  
plt.legend()  
plt.xlabel('Correlation threshold')  
plt.ylabel('Number of features')  
plt.show()
```

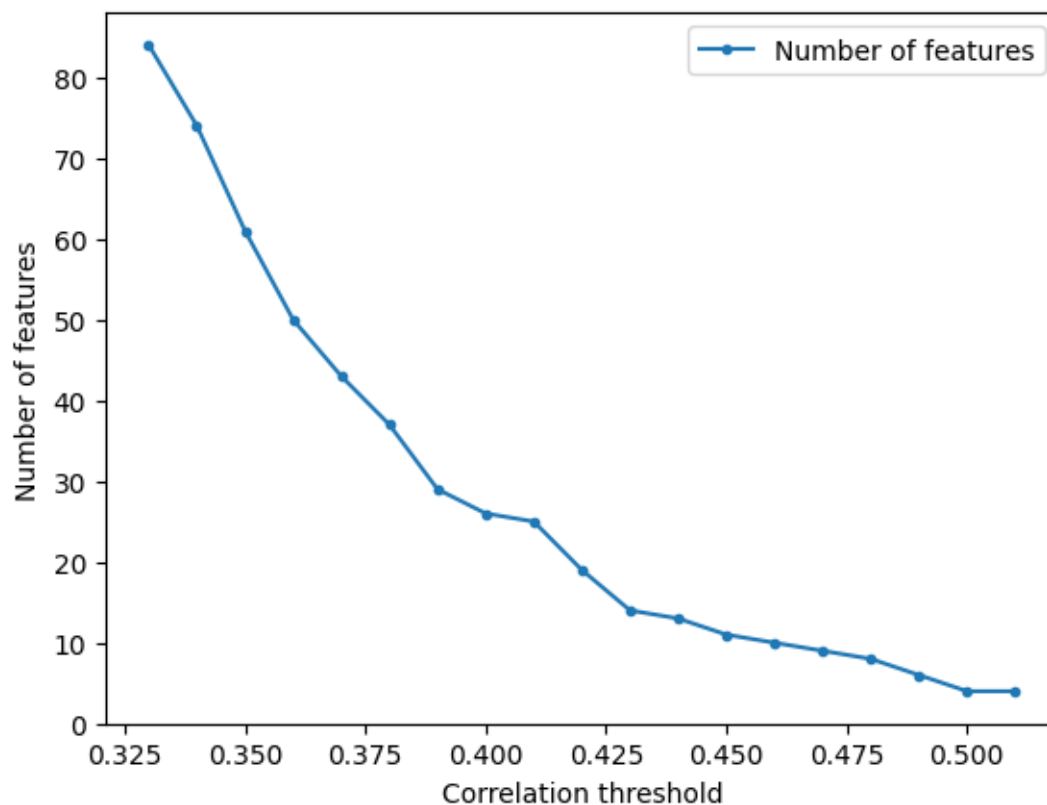

[ ]:

## 2.3 Decision Tree

```
[13]: without_standardization, train_r2_, test_r2_, hist1, hist2, target_column_name,
      ↪ training_data_RMSE, test_data_RMSE = pred_model.
      ↪ prepare_data_and_create_model(molecular_descriptors_df=data,
      ↪
      ↪         correlation_threshold=0.50,
      ↪
      ↪         standardization=False,
      ↪
      ↪         model_type='DecisionTreeRegressor',
      ↪
      ↪         max_depth=5,
      ↪
      ↪         target_column_name = target,
      ↪
      ↪         random_state=random_state,
```

```

↪          train_test_split_=True,
↪          verbose=True)

```

I am not doing standardization...

```

molecular descriptor name
0          AATSOZ
1          AATSOare
2          AATSOd
3          AATSOdv
4          AATSOi
molecular descriptor name  corr_value
0          AATSOZ      -0.038502
1          AATSOare    -0.120847
2          AATSOd      0.041648
3          AATSOdv     -0.115899
4          AATSOi      0.191765
molecular descriptor name  corr_value  absolute correlation value
0          AATSOZ      -0.038502          0.038502
1          AATSOare    -0.120847          0.120847
2          AATSOd      0.041648          0.041648
3          AATSOdv     -0.115899          0.115899
4          AATSOi      0.191765          0.191765
molecular descriptor name  corr_value  absolute correlation value
226          AMID_0      -0.520578          0.520578
505          EState_VSA5 -0.578904          0.578904
506          EState_VSA6 0.519794          0.519794
791          MDEO-12     -0.525441          0.525441
1211         MCF-7       1.000000          1.000000
molecular descriptor name  corr_value  absolute correlation value
226          AMID_0      -0.520578          0.520578
505          EState_VSA5 -0.578904          0.578904
506          EState_VSA6 0.519794          0.519794
791          MDEO-12     -0.525441          0.525441
The model used is: DecisionTree...
Return the coefficient of determination of the prediction:
0.48604135610978816
R^2 score: 0.8522633268113505
Correlation coefficient: 0.9231810910170065
Test data - unseen during training:
R^2 score: 0.48604135610978816
Correlation coefficient: 0.6971666630797747
[7.99044322 5.50688472 6.96137984 7.99044322 7.99044322 7.65055844
 7.99044322 7.35584115 7.99044322 7.99044322 8.39482702 8.39482702
 8.39482702 7.99044322 7.35584115 7.99044322 6.89807577 5.0424406 ]
102      7.958607
38       6.022276

```

```
8      5.949079
109    8.086186
11     8.013228
51     8.000000
88     8.119186
21     8.113509
82     7.982967
98     7.795880
58     7.677781
64     8.619789
74     8.327902
103    8.376751
91     9.154902
43     7.958607
25     4.949659
30     6.010550
```

Name: MCF-7, dtype: float64

Training Root Mean Square Error: 0.3576097994283484

Testing Root Mean Square Error: 0.7724927138832102

```
[14]: print(target_column_name+str('_transformed'))
      print(hist1[target_column_name].hist())
```

MCF-7\_transformed

AxesSubplot(0.125,0.11;0.775x0.77)

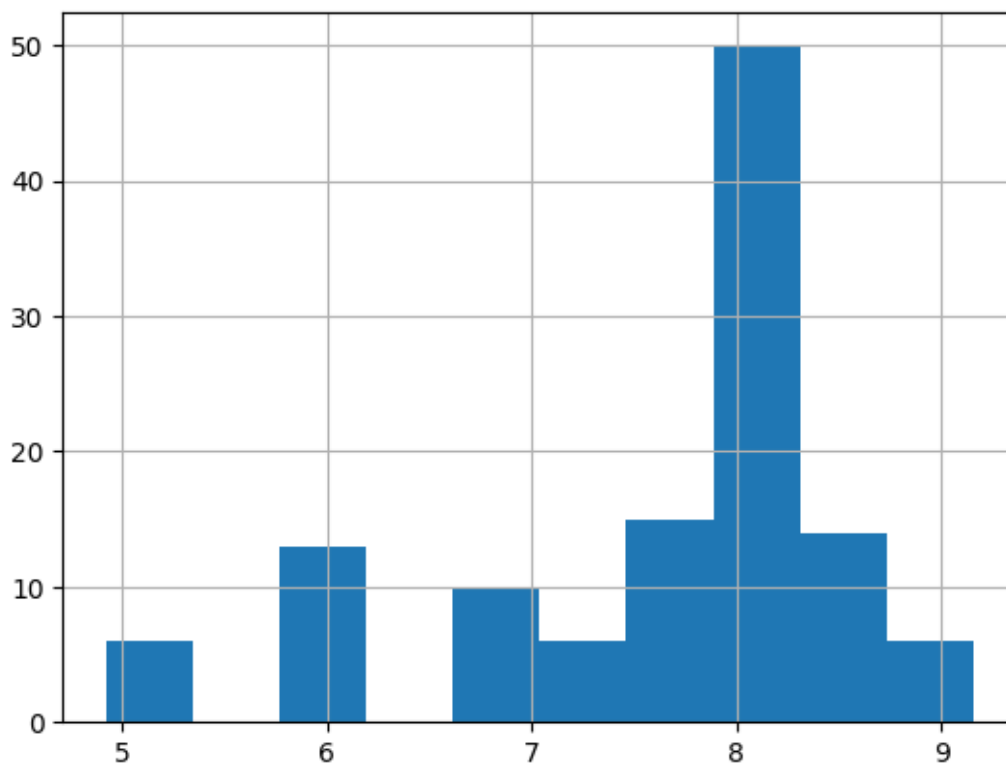

```
[15]: with_standardization, train_r2_, test_r2_, hist1, hist2, target_column_name,
      ↪ training_data_RMSE, test_data_RMSE = pred_model.
      ↪ prepare_data_and_create_model(molecular_descriptors_df=data,
      ↪
      ↪         correlation_threshold=0.50,
      ↪
      ↪         standardization=True,
      ↪
      ↪         model_type='DecisionTreeRegressor',
      ↪
      ↪         max_depth=5,
      ↪
      ↪         target_column_name = target,
      ↪
      ↪         random_state=random_state,
      ↪
      ↪         train_test_split_=True,
      ↪
      ↪         verbose=True)
```

I am doing standardization...

|   | molecular descriptor name |  |
|---|---------------------------|--|
| 0 | AATSOZ                    |  |
| 1 | AATSOare                  |  |
| 2 | AATSOd                    |  |
| 3 | AATSOdv                   |  |
| 4 | AATSOi                    |  |

  

|   | molecular descriptor name | corr_value |
|---|---------------------------|------------|
| 0 | AATSOZ                    | -0.038502  |
| 1 | AATSOare                  | -0.120847  |
| 2 | AATSOd                    | 0.041648   |
| 3 | AATSOdv                   | -0.115899  |
| 4 | AATSOi                    | 0.191765   |

  

|   | molecular descriptor name | corr_value | absolute correlation value |
|---|---------------------------|------------|----------------------------|
| 0 | AATSOZ                    | -0.038502  | 0.038502                   |
| 1 | AATSOare                  | -0.120847  | 0.120847                   |
| 2 | AATSOd                    | 0.041648   | 0.041648                   |
| 3 | AATSOdv                   | -0.115899  | 0.115899                   |
| 4 | AATSOi                    | 0.191765   | 0.191765                   |

  

|     | molecular descriptor name | corr_value | absolute correlation value |
|-----|---------------------------|------------|----------------------------|
| 226 | AMID_0                    | -0.520578  | 0.520578                   |
| 505 | EState_VSA5               | -0.578904  | 0.578904                   |
| 506 | EState_VSA6               | 0.519794   | 0.519794                   |
| 791 | MDE0-12                   | -0.525441  | 0.525441                   |



|      |                           |            |                            |
|------|---------------------------|------------|----------------------------|
| 1211 | MCF-7                     | 1.000000   | 1.000000                   |
|      | molecular descriptor name | corr_value | absolute correlation value |
| 226  | AMID_0                    | -0.520578  | 0.520578                   |
| 505  | EState_VSA5               | -0.578904  | 0.578904                   |
| 506  | EState_VSA6               | 0.519794   | 0.519794                   |
| 791  | MDEO-12                   | -0.525441  | 0.525441                   |

The model used is: DecisionTree...

Return the coefficient of determination of the prediction:

0.48604135610978816

R<sup>2</sup> score: 0.8522633268113505

Correlation coefficient: 0.9231810910170065

Test data - unseen during training:

R<sup>2</sup> score: 0.48604135610978816

Correlation coefficient: 0.6971666630797747

[7.99044322 5.50688472 6.96137984 7.99044322 7.99044322 7.65055844  
 7.99044322 7.35584115 7.99044322 7.99044322 8.39482702 8.39482702  
 8.39482702 7.99044322 7.35584115 7.99044322 6.89807577 5.0424406 ]

102 7.958607

38 6.022276

8 5.949079

109 8.086186

11 8.013228

51 8.000000

88 8.119186

21 8.113509

82 7.982967

98 7.795880

58 7.677781

64 8.619789

74 8.327902

103 8.376751

91 9.154902

43 7.958607

25 4.949659

30 6.010550

Name: MCF-7, dtype: float64

Training Root Mean Square Error: 0.3576097994283484

Testing Root Mean Square Error: 0.7724927138832102

## 2.4 Search inside correlation space

```
[16]: step = 0.01
      initial_step = corr_low
      last_step = corr_high
      first_list = [x / 100.0 for x in range(int(initial_step*100),
      ↪int(last_step*100), int(step*100))]
      max_depth = [range(2, 30, 1)]
```

```

corr_th = []
second_list = []
third_list = []
fourth_l = []
fifth_l = []
f_list = []
fif_list = []
for i in first_list:
    for depth in max_depth[0]:

        without_standardization, train_r2, test_r2, _, h_, target_column_name,
        ↪training_data_RMSE, test_data_RMSE = pred_model.
        ↪prepare_data_and_create_model(molecular_descriptors_df=data,

        ↪
            correlation_threshold=i,
        ↪
            standardization=False,
        ↪
            model_type='DecisionTreeRegressor',
        ↪
            max_depth=depth,
        ↪
            target_column_name = target,
        ↪
            random_state=random_state,
        ↪
            train_test_split_=True,
        ↪
            verbose=False)
        corr_th.append(i)
        second_list.append(train_r2)
        third_list.append(test_r2)
        fourth_l.append(training_data_RMSE)
        fifth_l.append(test_data_RMSE)
        f_list.append(len(h_))
        fif_list.append(depth)

```

```

[17]: df_without_standardization = pd.DataFrame(data=corr_th, columns=["Correlation_
    ↪threshold"])
df_without_standardization['Training data R^2 score'] = second_list
df_without_standardization['Test data R^2 score'] = third_list
df_without_standardization['Training RMSE'] = fourth_l
df_without_standardization['Test RMSE'] = fifth_l
df_without_standardization['Number of features'] = f_list
df_without_standardization['Depth number'] = fif_list

```

```
[18]: df_decision_tree = df_without_standardization.copy()
      #df_without_standardization.to_excel('../Data/
      ↪A549_Decision_tree_rs_'+str(random_state)+'.xlsx')
```

## 2.5 Plots

```
[19]: corre_list = [x / 100.0 for x in range(int(initial_step*100),
      ↪int(last_step*100), int(0.01*100))]
      for element in corre_list:
          element_ =
          ↪df_without_standardization[df_without_standardization['Correlation_
          ↪threshold'] == float(element)]
          plt.plot(element_['Depth number'], element_['Training data R^2 score'],
          ↪label = "Training data R^2 score", marker='v')
          plt.plot(element_['Depth number'], element_['Test data R^2 score'], label =
          ↪"Test data R^2 score", marker='D')
          plt.legend()
          plt.xlabel('Depth number -> correlation threshold: '+str(element)+'.'
          ↪Number of features: '+str(element_['Number of features'].iloc[0]),
          ↪fontweight='bold')
          plt.xlim(max(element_['Depth number'])+1, min(element_['Depth number'])-1)
          plt.ylabel('R^2 score')
          plt.ylim([0, 1])
          plt.rc('grid', linestyle="-. ", color='black')
          plt.grid(True)
          plt.show()
```

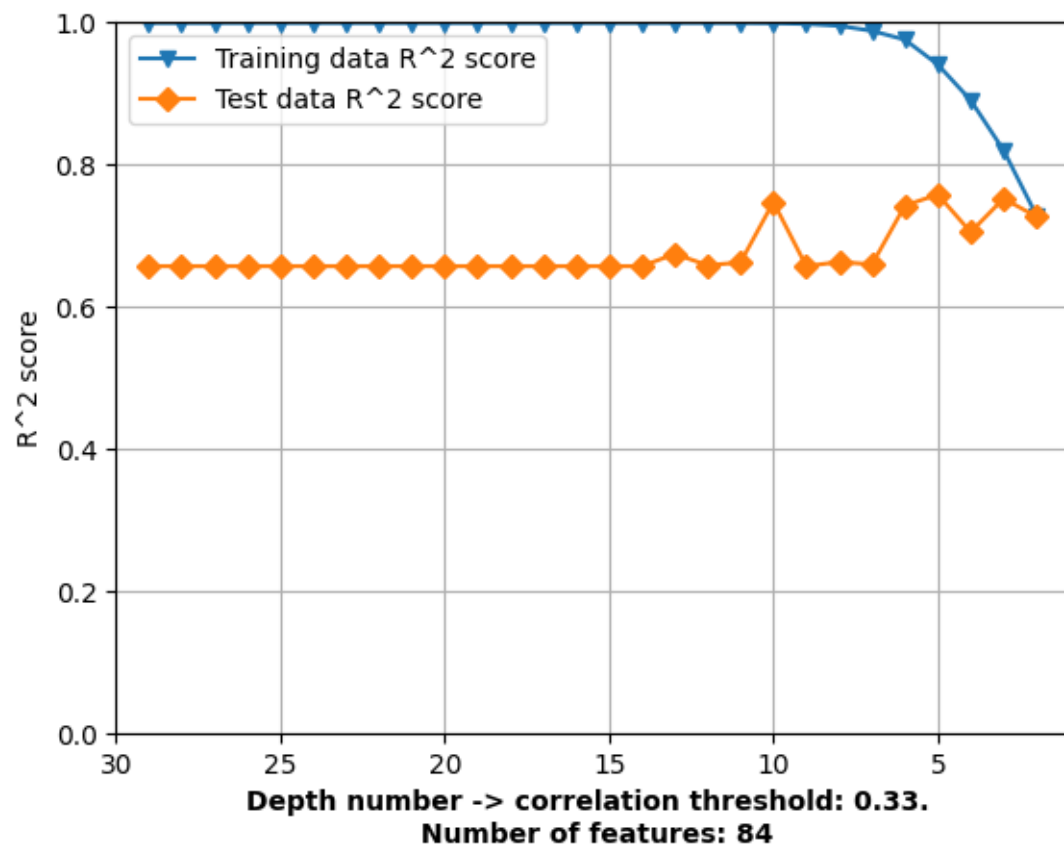

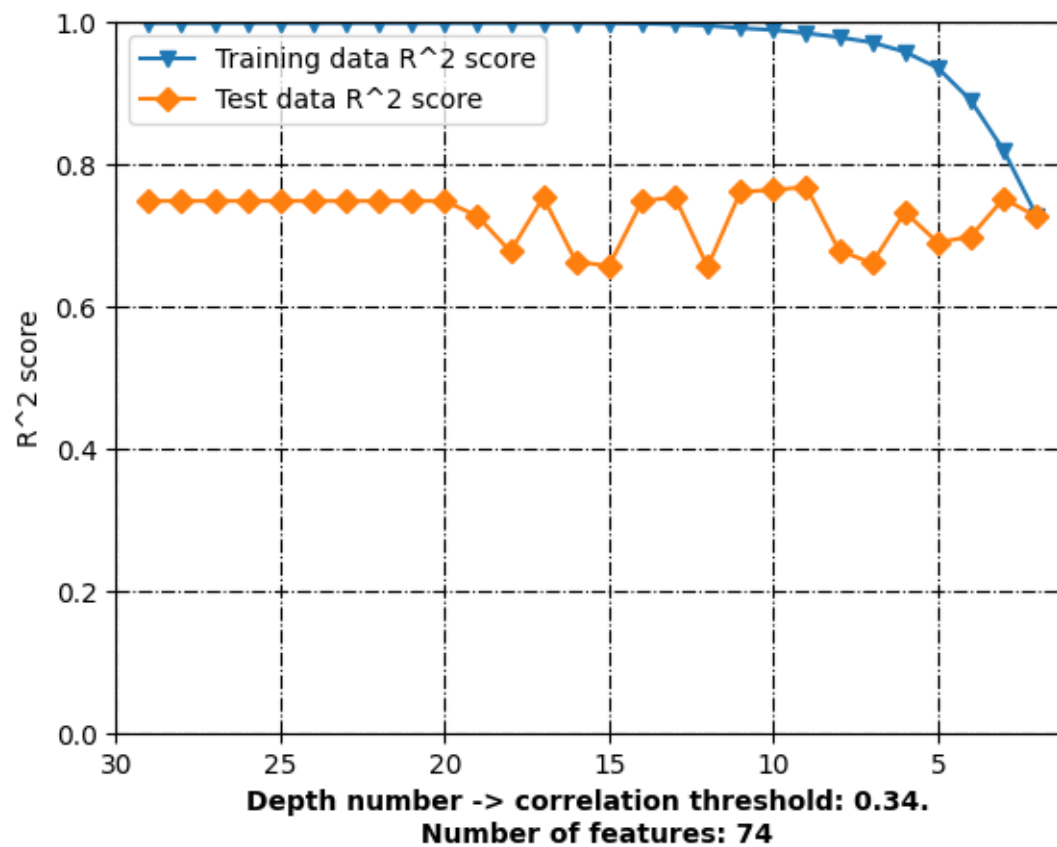

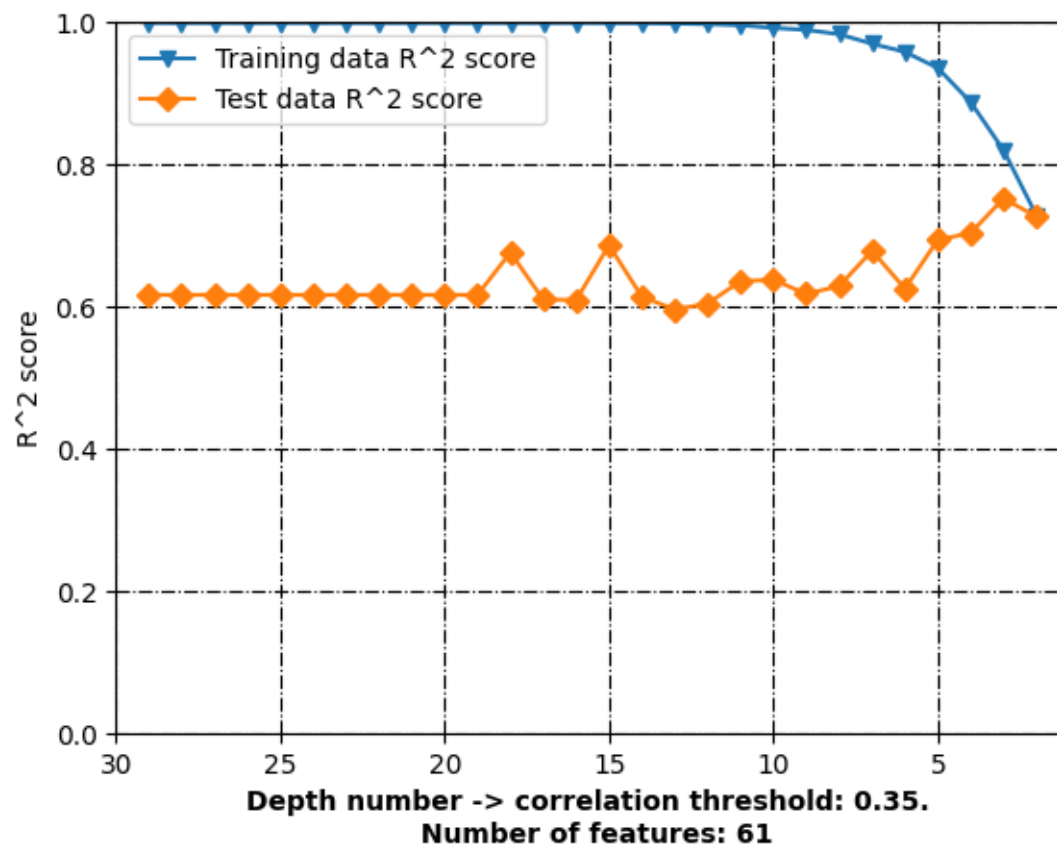

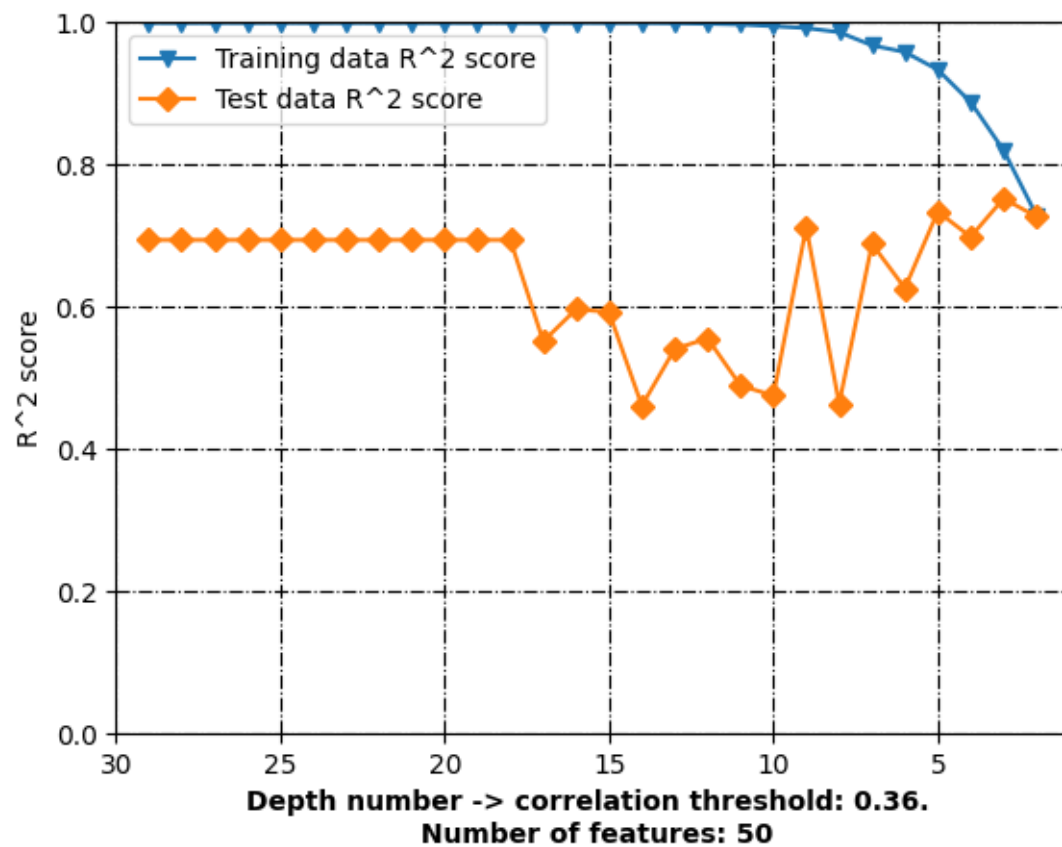

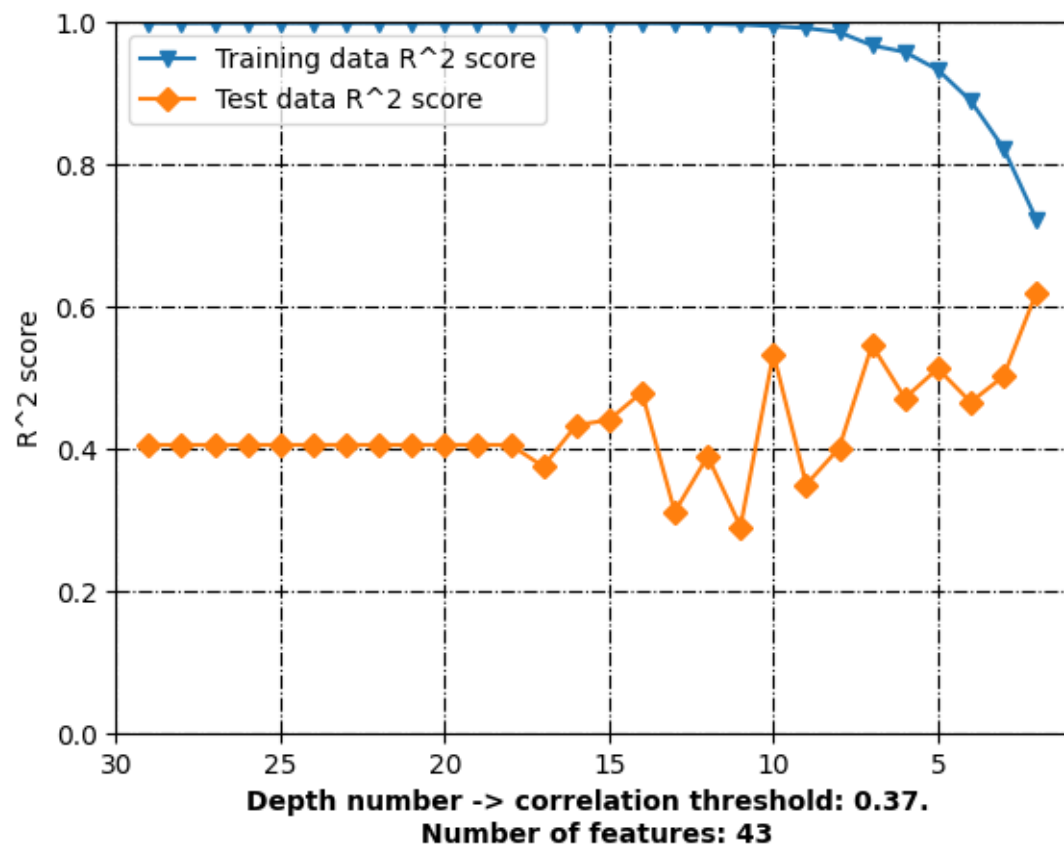



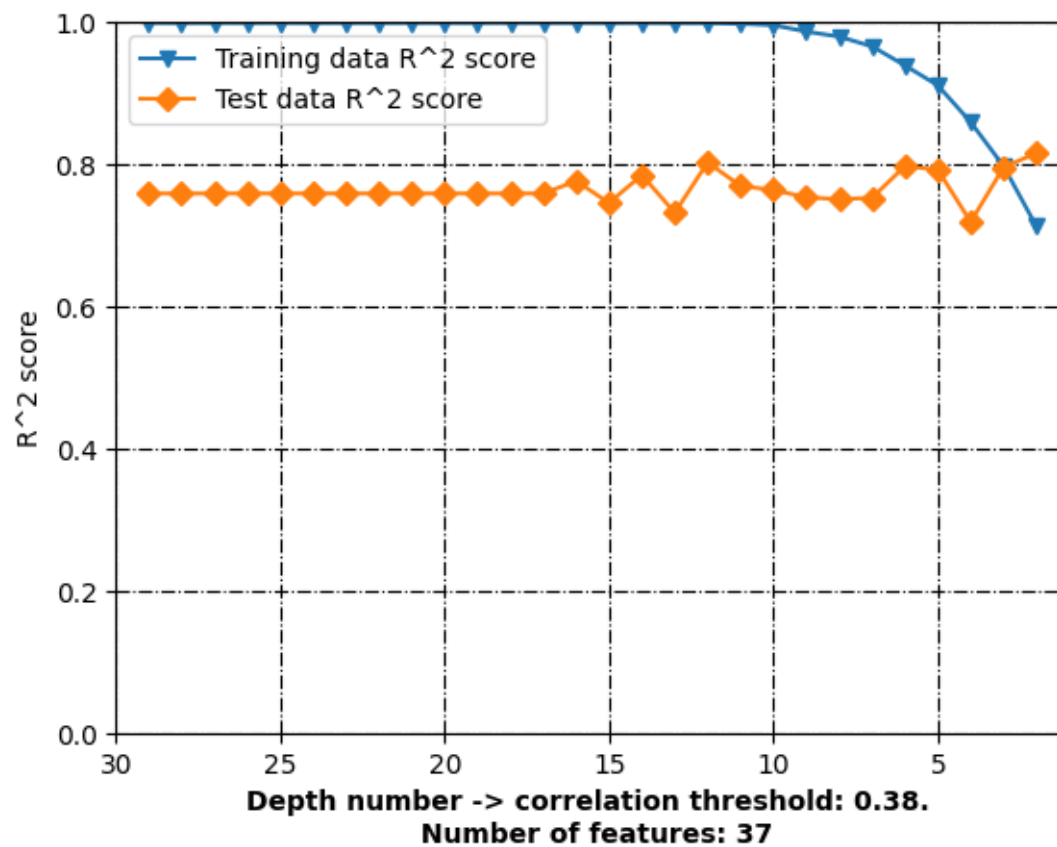

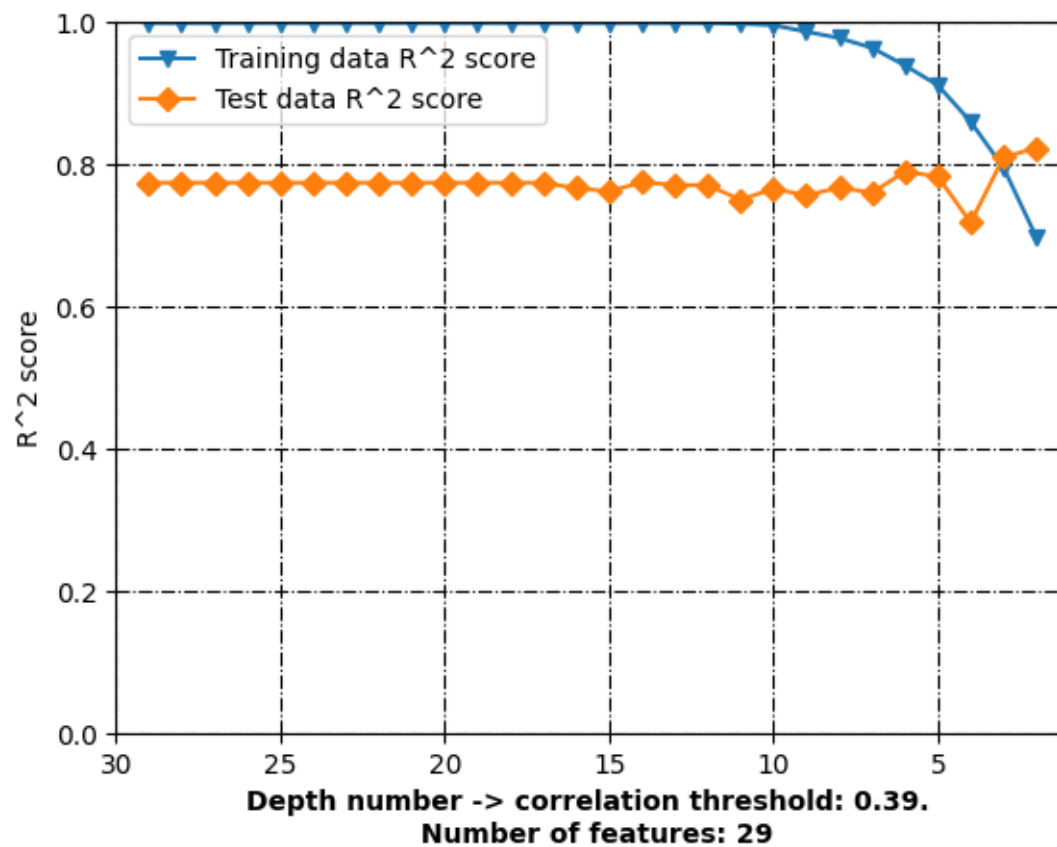

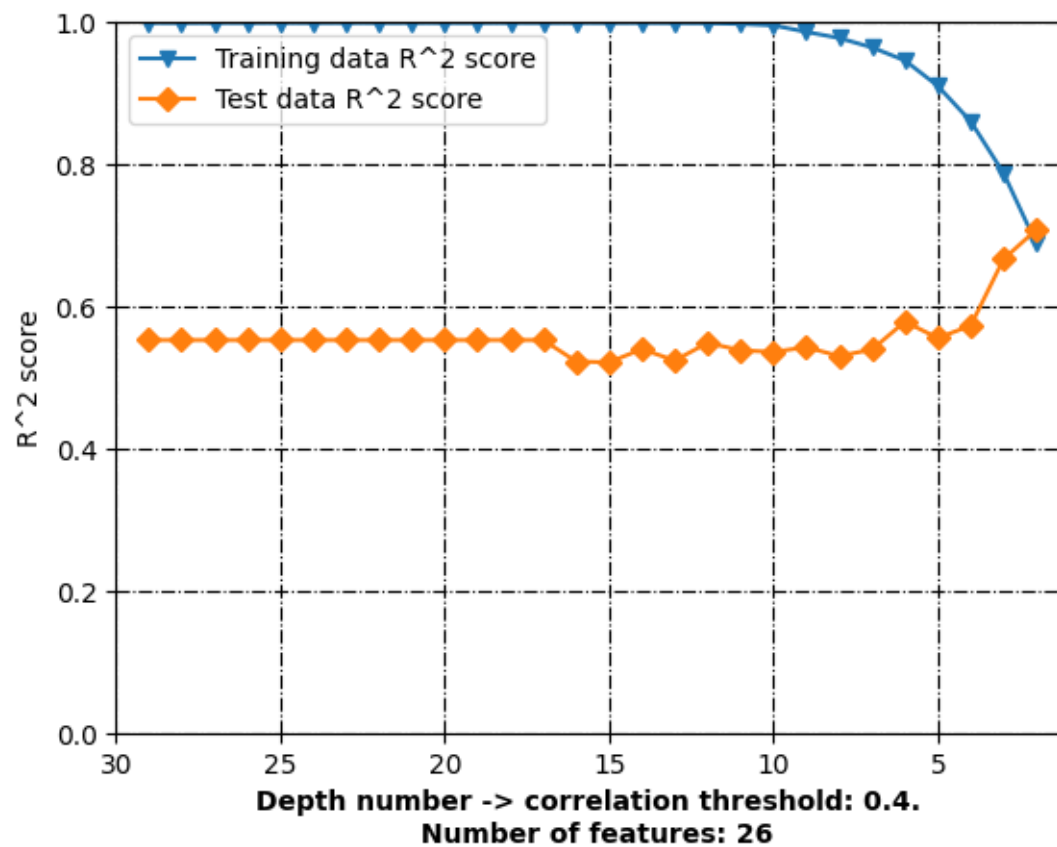

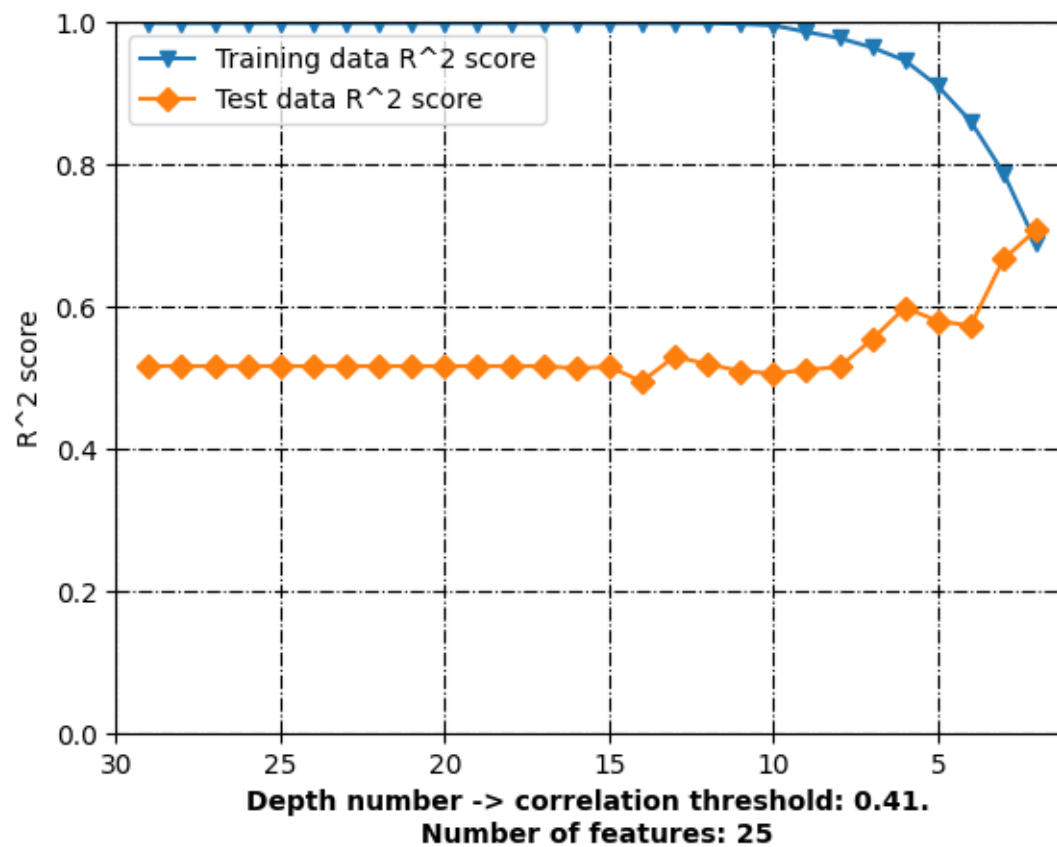

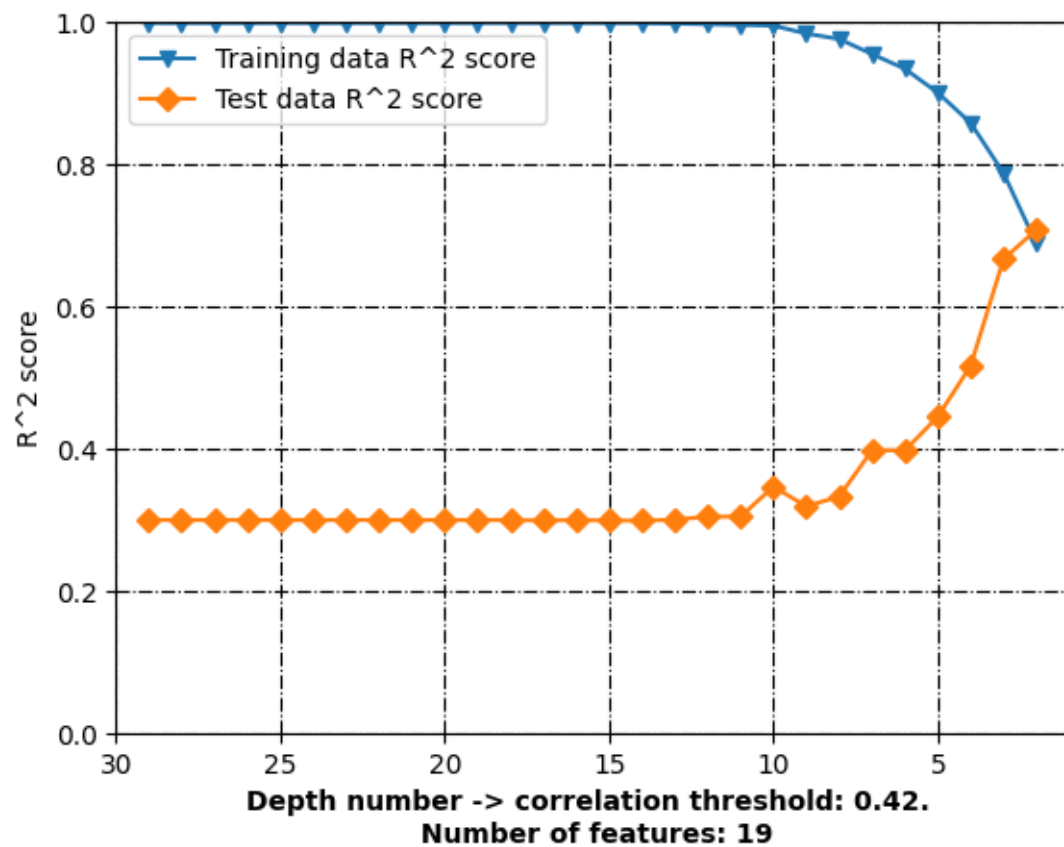

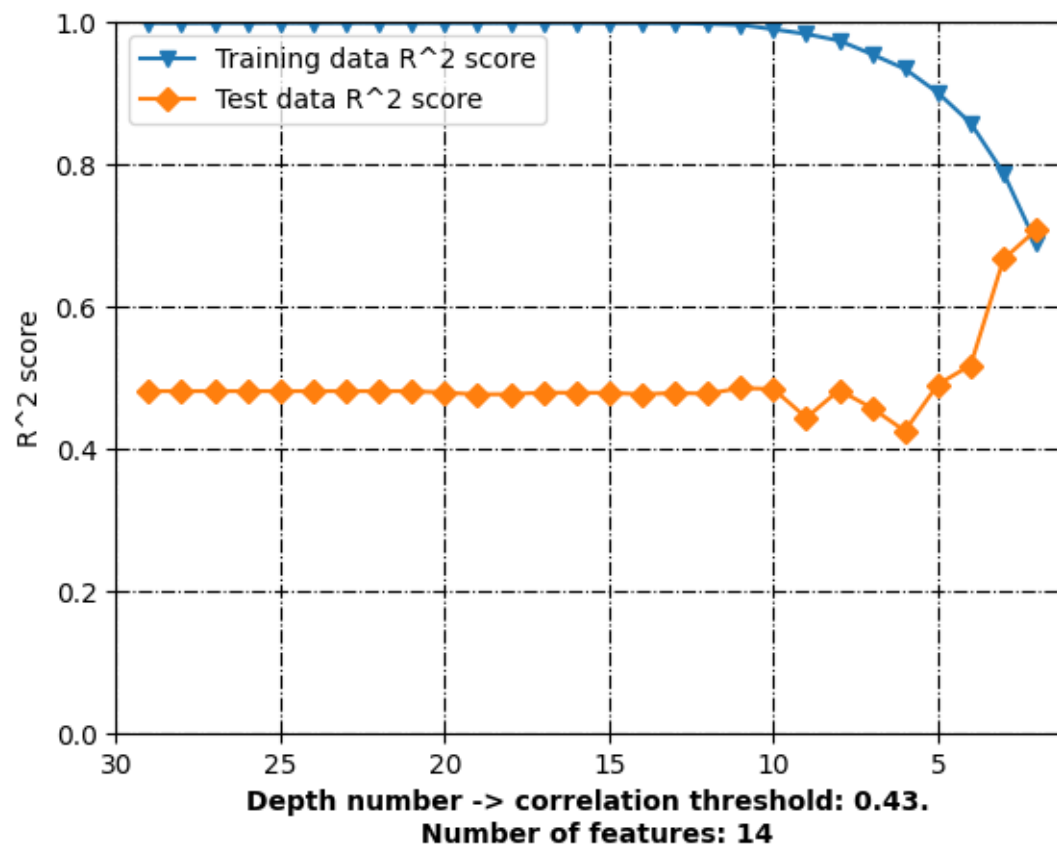

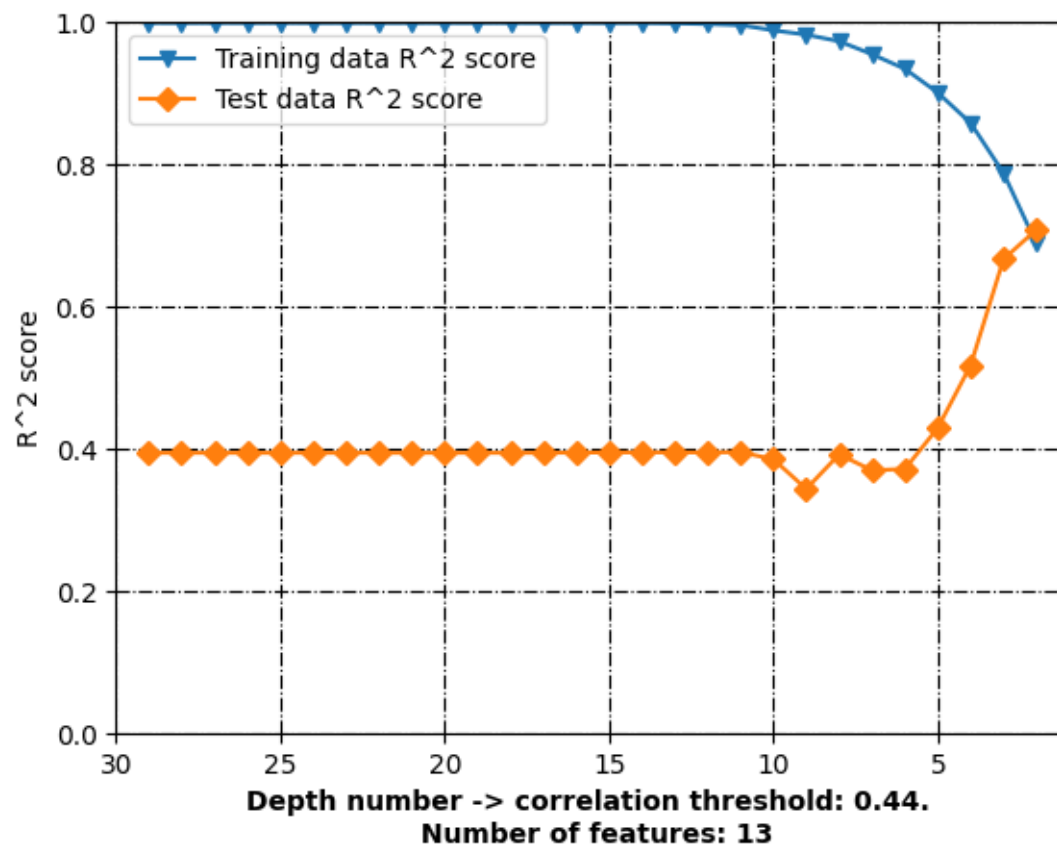

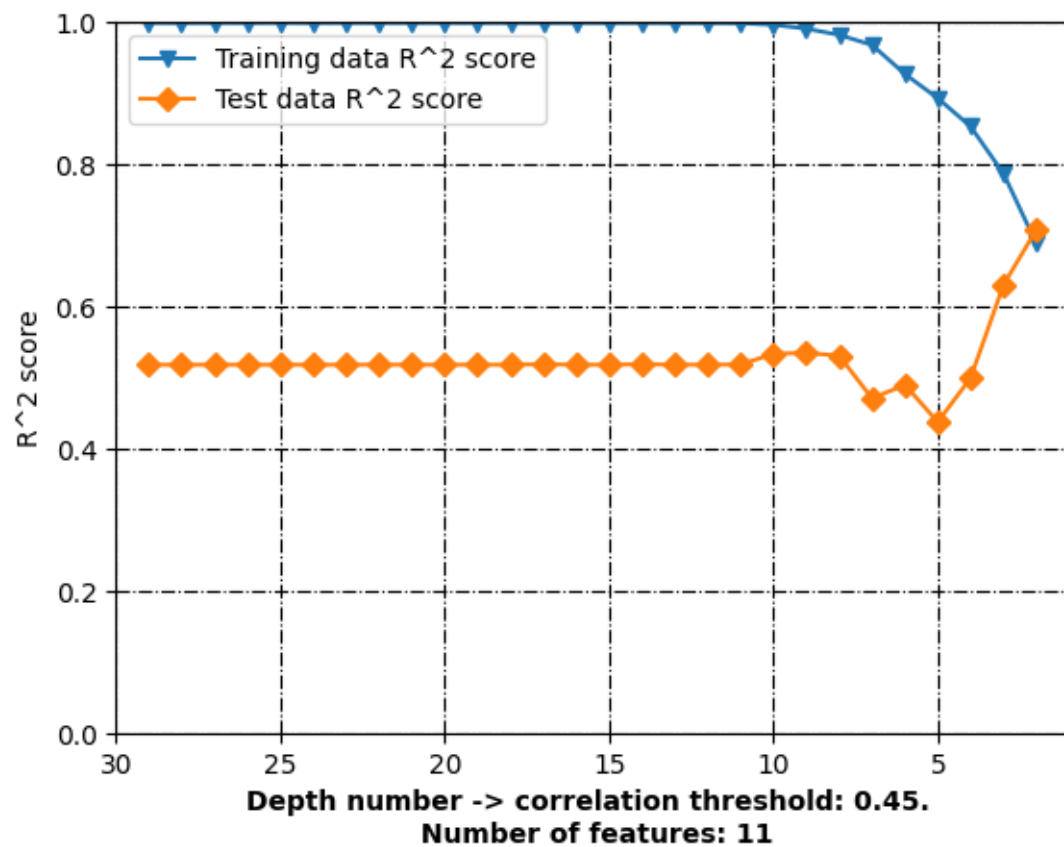



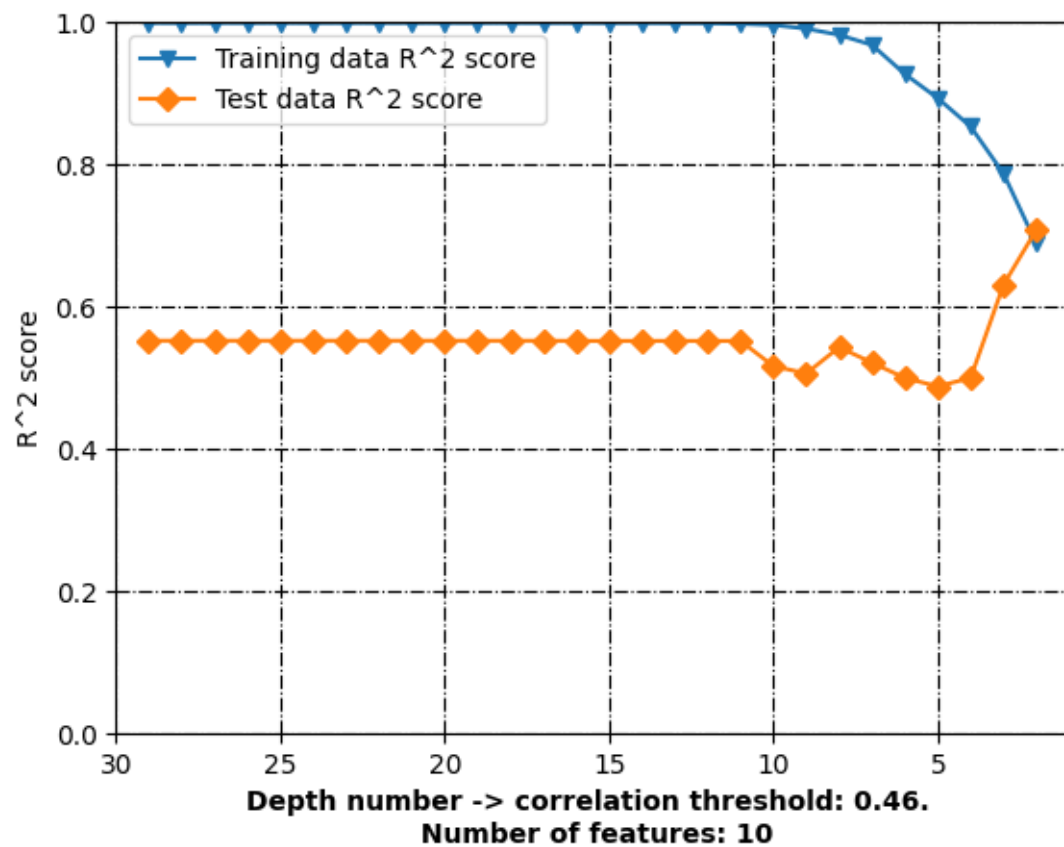

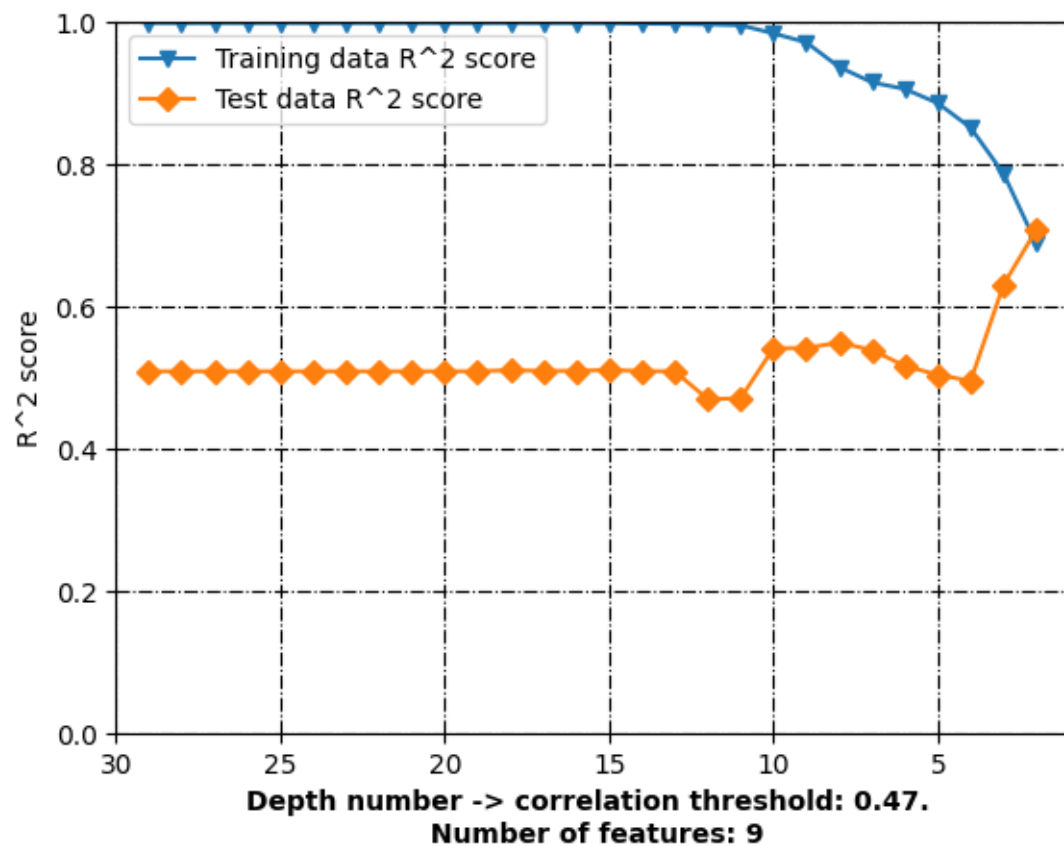

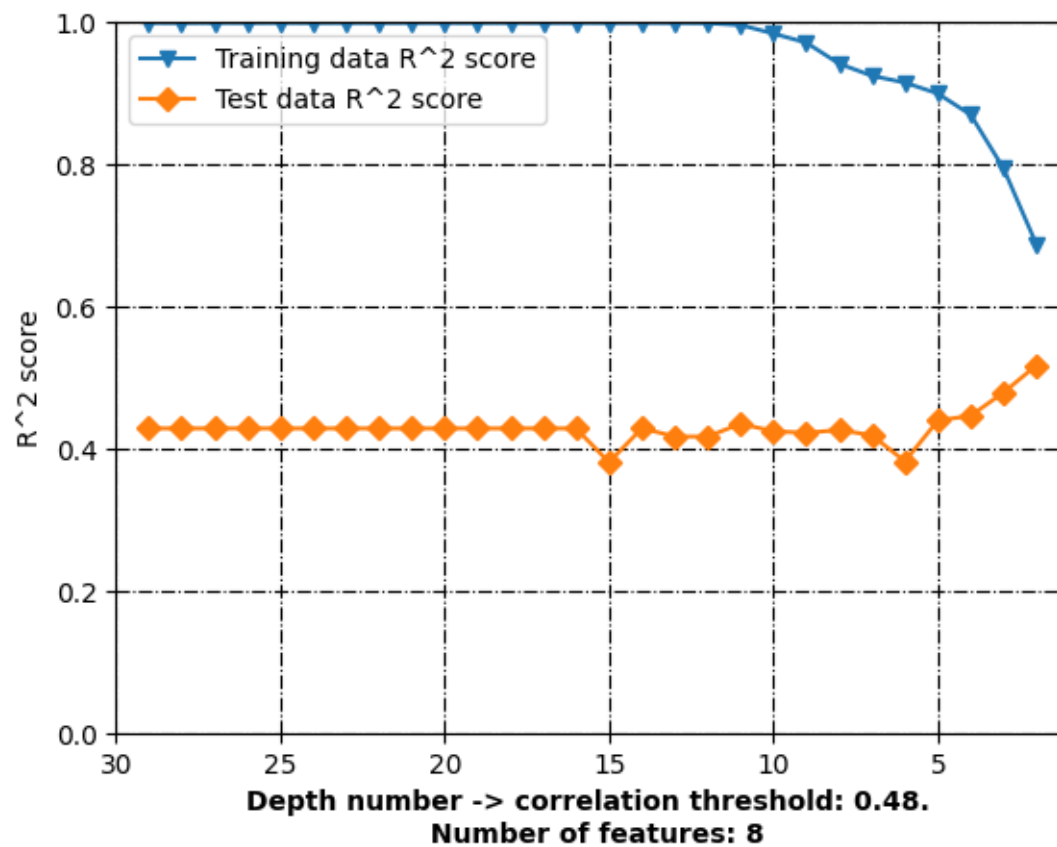

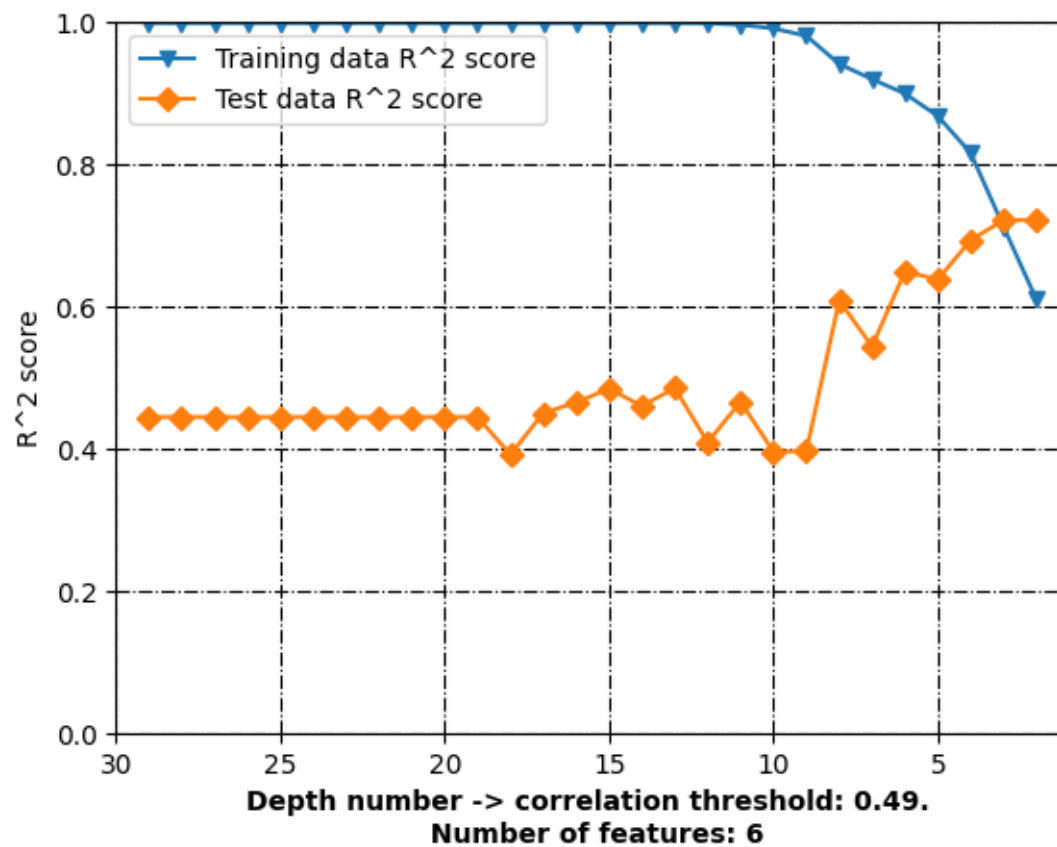

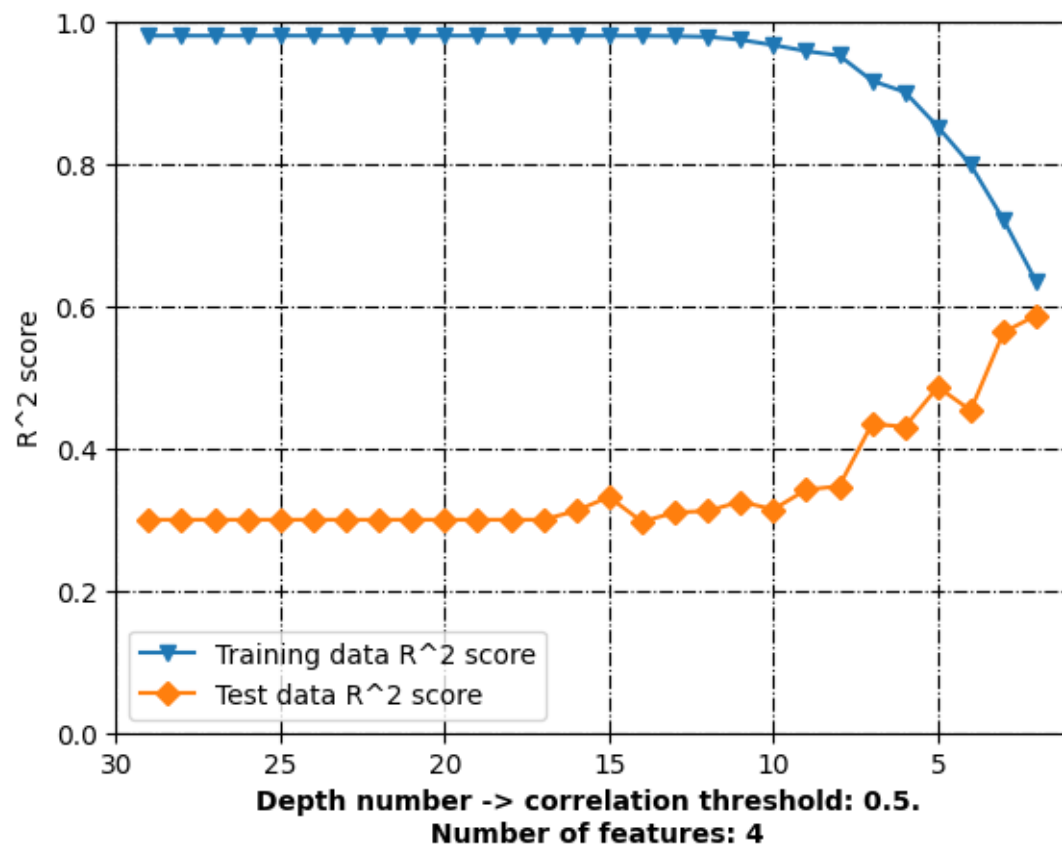

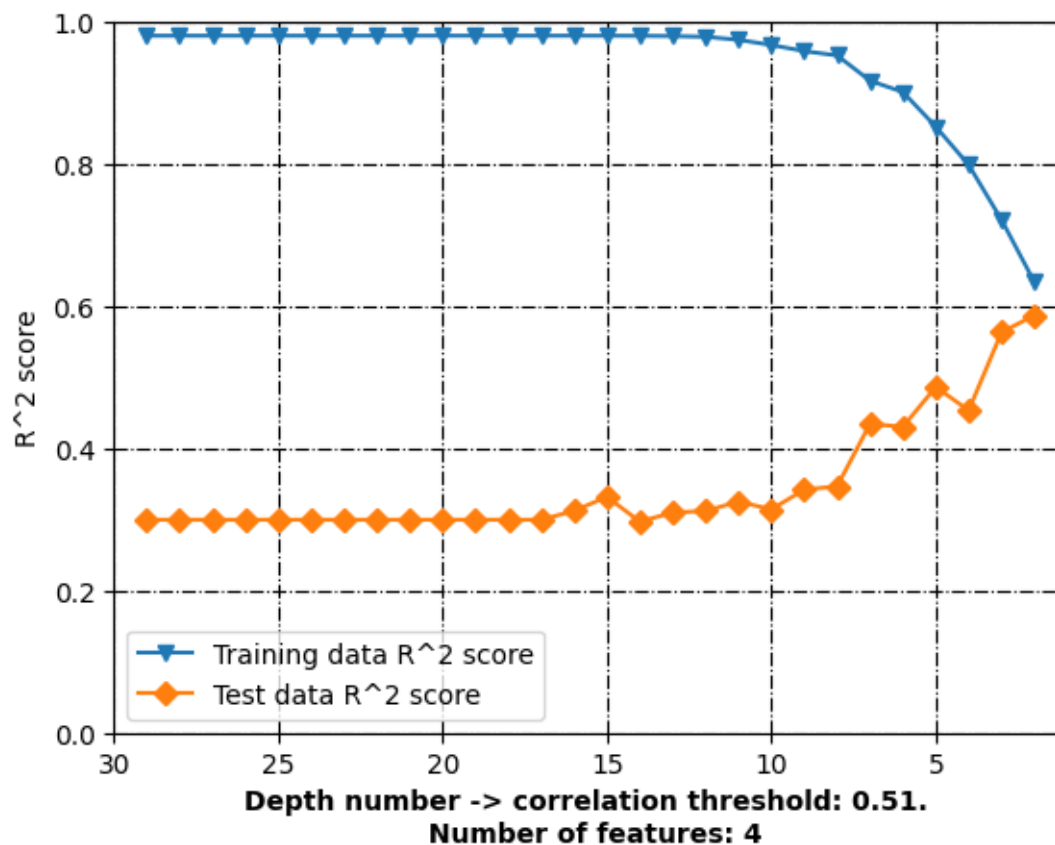

```
[20]: plt.plot(df_without_standardization['Correlation threshold'],  
             df_without_standardization['Number of features'], label = "Number of  
             features", marker='.')  
plt.legend()  
plt.xlabel('Correlation threshold')  
plt.ylabel('Number of features')  
plt.show()
```

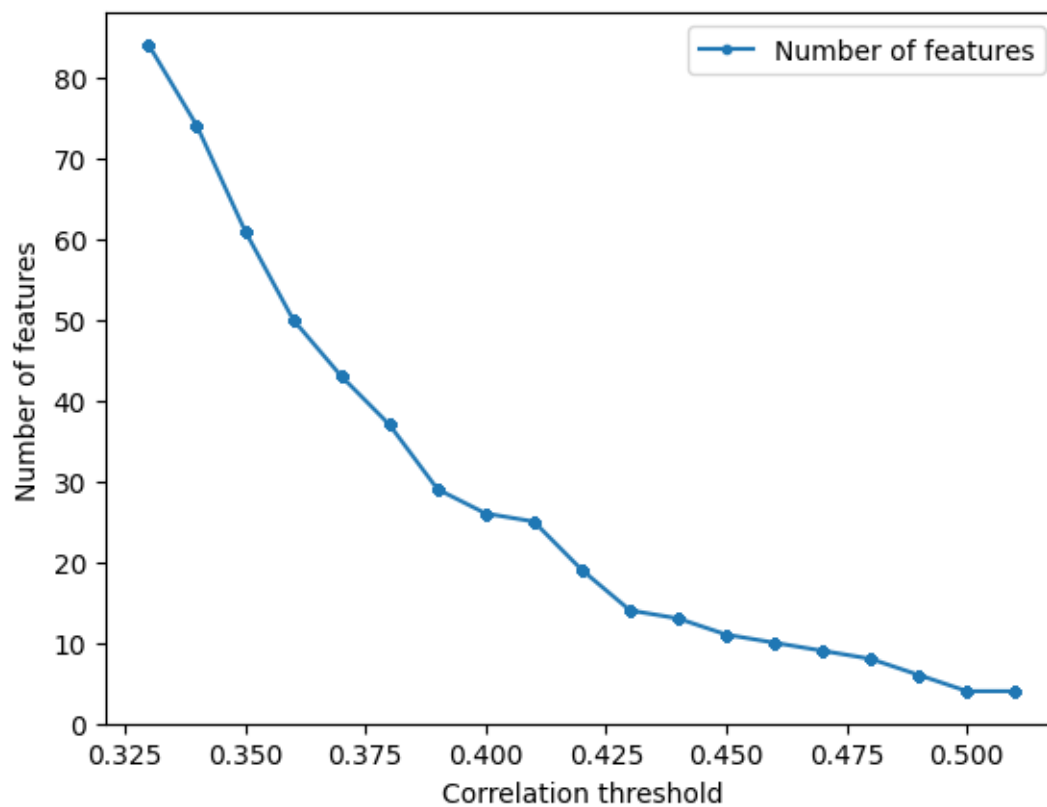

[ ]:

### 3 Random Forest

```
[21]: without_standardization, train_r2_, test_r2_, hist1, hist2, target_column_name,
      ↪ training_data_RMSE, test_data_RMSE = pred_model.
      ↪ prepare_data_and_create_model(molecular_descriptors_df=data,
      ↪
      ↪         correlation_threshold=0.50,
      ↪
      ↪         standardization=False,
      ↪
      ↪         model_type='RandomForestRegressor',
      ↪
      ↪         n_estimators=12,
      ↪
      ↪         target_column_name = target,
      ↪
      ↪         random_state=random_state,
```

```

↪          train_test_split_=True,
↪          verbose=True)

```

I am not doing standardization...

```

molecular descriptor name
0          AATSOZ
1          AATSOare
2          AATSOd
3          AATSOdv
4          AATSOi
molecular descriptor name  corr_value
0          AATSOZ      -0.038502
1          AATSOare    -0.120847
2          AATSOd      0.041648
3          AATSOdv     -0.115899
4          AATSOi      0.191765
molecular descriptor name  corr_value  absolute correlation value
0          AATSOZ      -0.038502          0.038502
1          AATSOare    -0.120847          0.120847
2          AATSOd      0.041648          0.041648
3          AATSOdv     -0.115899          0.115899
4          AATSOi      0.191765          0.191765
molecular descriptor name  corr_value  absolute correlation value
226          AMID_0      -0.520578          0.520578
505          EState_VSA5 -0.578904          0.578904
506          EState_VSA6 0.519794          0.519794
791          MDEO-12     -0.525441          0.525441
1211         MCF-7       1.000000          1.000000
molecular descriptor name  corr_value  absolute correlation value
226          AMID_0      -0.520578          0.520578
505          EState_VSA5 -0.578904          0.578904
506          EState_VSA6 0.519794          0.519794
791          MDEO-12     -0.525441          0.525441
The model used is: RandomForest...
Return the coefficient of determination of the prediction:
0.45189820560775484
R^2 score: 0.8988911629700564
Correlation coefficient: 0.9480987095076422
Test data - unseen during training:
R^2 score: 0.45189820560775484
Correlation coefficient: 0.6722337432826136
[7.48904776 5.75768222 7.01387872 8.03604241 8.004483  7.59008558
 8.05858924 7.30810016 7.41942745 8.24788273 8.12758092 8.34192311
 8.44322142 7.6573918  7.53840752 8.03812066 7.16953157 5.43756702]
102      7.958607
38       6.022276

```



```

8      5.949079
109    8.086186
11     8.013228
51     8.000000
88     8.119186
21     8.113509
82     7.982967
98     7.795880
58     7.677781
64     8.619789
74     8.327902
103    8.376751
91     9.154902
43     7.958607
25     4.949659
30     6.010550

```

Name: MCF-7, dtype: float64

Training Root Mean Square Error: 0.295841987221968

Testing Root Mean Square Error: 0.7977391691942761

```

[22]: print(target_column_name+str('_transformed'))
      print(hist1[target_column_name].hist())

```

MCF-7\_transformed

AxesSubplot(0.125,0.11;0.775x0.77)

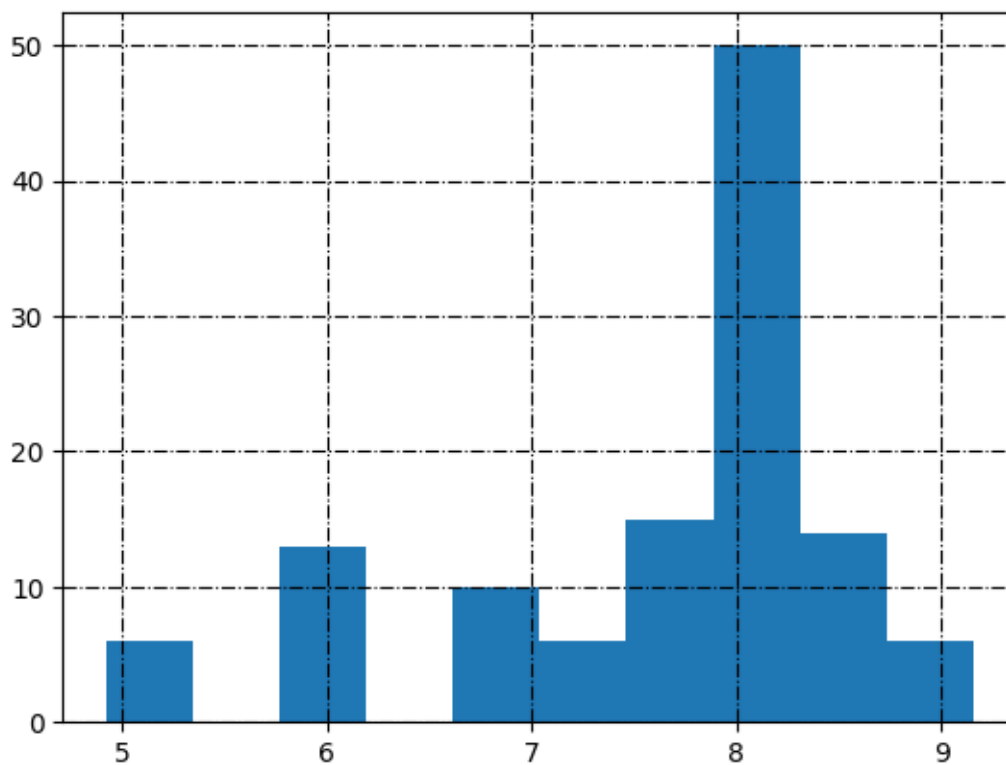

```
[23]: with_standardization, train_r2_, test_r2_, hist1, hist2, target_column_name,
      ↪ training_data_RMSE, test_data_RMSE = pred_model.
      ↪ prepare_data_and_create_model(molecular_descriptors_df=data,
      ↪
      ↪         correlation_threshold=0.50,
      ↪
      ↪         standardization=True,
      ↪
      ↪         model_type='RandomForestRegressor',
      ↪
      ↪         n_estimators=12,
      ↪
      ↪         target_column_name = target,
      ↪
      ↪         random_state=random_state,
      ↪
      ↪         train_test_split_=True,
      ↪
      ↪         verbose=True)
```

I am doing standardization...

|     | molecular descriptor name |            |                            |
|-----|---------------------------|------------|----------------------------|
| 0   | AATSOZ                    |            |                            |
| 1   | AATSOare                  |            |                            |
| 2   | AATSOd                    |            |                            |
| 3   | AATSOdv                   |            |                            |
| 4   | AATSOi                    |            |                            |
|     | molecular descriptor name | corr_value |                            |
| 0   | AATSOZ                    | -0.038502  |                            |
| 1   | AATSOare                  | -0.120847  |                            |
| 2   | AATSOd                    | 0.041648   |                            |
| 3   | AATSOdv                   | -0.115899  |                            |
| 4   | AATSOi                    | 0.191765   |                            |
|     | molecular descriptor name | corr_value | absolute correlation value |
| 0   | AATSOZ                    | -0.038502  | 0.038502                   |
| 1   | AATSOare                  | -0.120847  | 0.120847                   |
| 2   | AATSOd                    | 0.041648   | 0.041648                   |
| 3   | AATSOdv                   | -0.115899  | 0.115899                   |
| 4   | AATSOi                    | 0.191765   | 0.191765                   |
|     | molecular descriptor name | corr_value | absolute correlation value |
| 226 | AMID_0                    | -0.520578  | 0.520578                   |
| 505 | EState_VSA5               | -0.578904  | 0.578904                   |
| 506 | EState_VSA6               | 0.519794   | 0.519794                   |
| 791 | MDE0-12                   | -0.525441  | 0.525441                   |

|      |                           |            |                            |
|------|---------------------------|------------|----------------------------|
| 1211 | MCF-7                     | 1.000000   | 1.000000                   |
|      | molecular descriptor name | corr_value | absolute correlation value |
| 226  | AMID_0                    | -0.520578  | 0.520578                   |
| 505  | EState_VSA5               | -0.578904  | 0.578904                   |
| 506  | EState_VSA6               | 0.519794   | 0.519794                   |
| 791  | MDE0-12                   | -0.525441  | 0.525441                   |

The model used is: RandomForest...

Return the coefficient of determination of the prediction:

0.45189820560775484

R<sup>2</sup> score: 0.8988911629700564

Correlation coefficient: 0.9480987095076422

Test data - unseen during training:

R<sup>2</sup> score: 0.45189820560775484

Correlation coefficient: 0.6722337432826136

[7.48904776 5.75768222 7.01387872 8.03604241 8.004483 7.59008558  
8.05858924 7.30810016 7.41942745 8.24788273 8.12758092 8.34192311  
8.44322142 7.6573918 7.53840752 8.03812066 7.16953157 5.43756702]

102 7.958607

38 6.022276

8 5.949079

109 8.086186

11 8.013228

51 8.000000

88 8.119186

21 8.113509

82 7.982967

98 7.795880

58 7.677781

64 8.619789

74 8.327902

103 8.376751

91 9.154902

43 7.958607

25 4.949659

30 6.010550

Name: MCF-7, dtype: float64

Training Root Mean Square Error: 0.295841987221968

Testing Root Mean Square Error: 0.7977391691942761

### 3.1 Search inside correlation space

```
[24]: step = 0.01
      initial_step = corr_low
      last_step = corr_high
      first_list = [x / 100.0 for x in range(int(initial_step*100),
      ↪int(last_step*100), int(step*100))]
      n_estimators = [range(2,21,1)]
```

```

corr_th = []
second_list = []
third_list = []
fourth_l = []
fifth_l = []
f_list = []
fif_list = []
for i in first_list:

    for estimator in n_estimators[0]:

        without_standardization, train_r2, test_r2, _, h_, target_column_name,
        ↪ training_data_RMSE, test_data_RMSE = pred_model.
        ↪ prepare_data_and_create_model(molecular_descriptors_df=data,

        ↪
                                correlation_threshold=i,

        ↪
                                standardization=False,

        ↪
                                model_type='RandomForestRegressor',

        ↪
                                n_estimators_=estimator,

        ↪
                                target_column_name = target,

        ↪
                                random_state=random_state,

        ↪
                                train_test_split_=True,

        ↪
                                verbose=False)
        corr_th.append(i)
        second_list.append(train_r2)
        third_list.append(test_r2)
        fourth_l.append(training_data_RMSE)
        fifth_l.append(test_data_RMSE)
        f_list.append(len(h_))
        fif_list.append(estimator)

```

```

[25]: df_without_standardization = pd.DataFrame(data=corr_th, columns=["Correlation_
        ↪ threshold"])
df_without_standardization['Training data R^2 score'] = second_list
df_without_standardization['Test data R^2 score'] = third_list
df_without_standardization['Training RMSE'] = fourth_l
df_without_standardization['Test RMSE'] = fifth_l
df_without_standardization['Number of features'] = f_list
df_without_standardization['Number of estimators'] = fif_list

```

```

[26]: df_random_forest = df_without_standardization.copy()
      #df_without_standardization.to_excel('../Data/
      ↪A549_Random_forest_rs_'+str(random_state)+'.xlsx')

[27]: corre_list = [x / 100.0 for x in range(int(initial_step*100),
      ↪int(last_step*100), int(0.01*100))]
      for element in corre_list:
          element_ =
          ↪df_without_standardization[df_without_standardization['Correlation_
          ↪threshold'] == float(element)]
          plt.plot(element_['Number of estimators'], element_['Training data R^2_
          ↪score'], label = "Training data R^2 score", marker='v')
          plt.plot(element_['Number of estimators'], element_['Test data R^2 score'],
          ↪label = "Test data R^2 score", marker='D')
          plt.legend()
          plt.xlabel('Number of estimators -> correlation threshold: '+str(element)+'.'
          ↪\n Number of features: '+str(element_['Number of features'].iloc[0]))
          plt.xlim(max(element_['Number of estimators'])+1, min(element_['Number of_
          ↪estimators'])-1)
          plt.ylabel('R^2 score')
          plt.ylim([0, 1])
          plt.rc('grid', linestyle="-. ", color='black')
          plt.grid(True)
          plt.show()

```

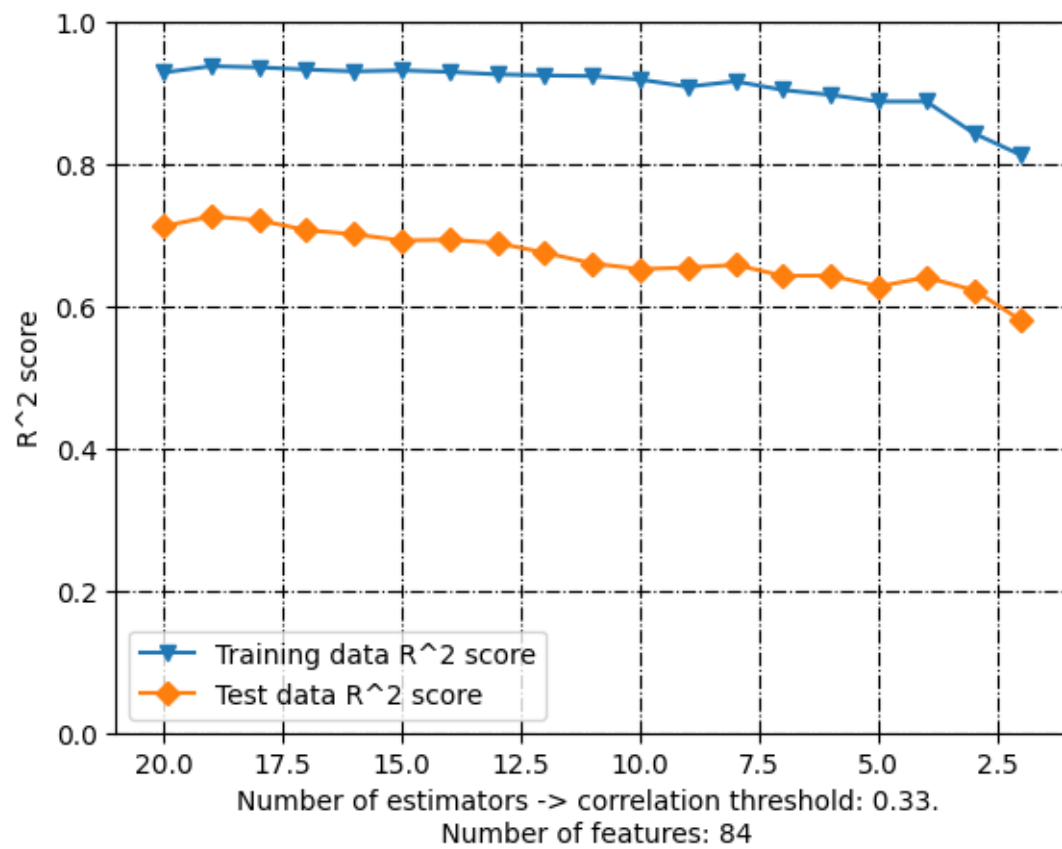

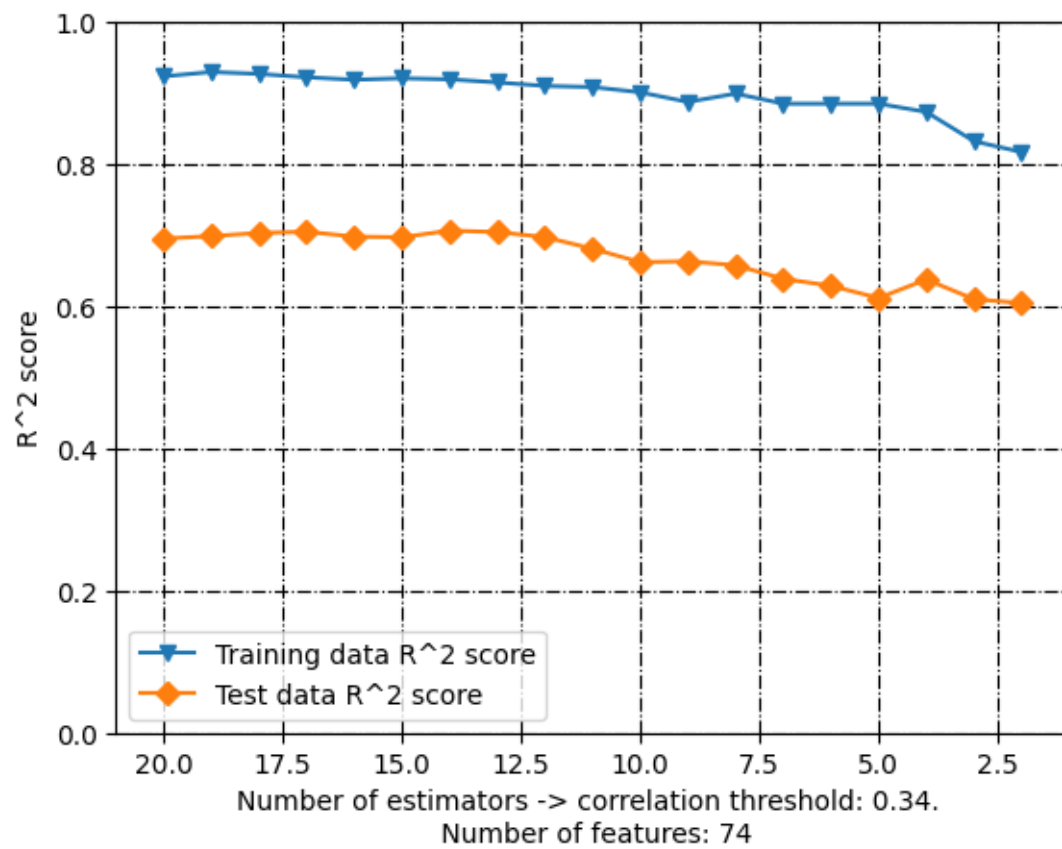

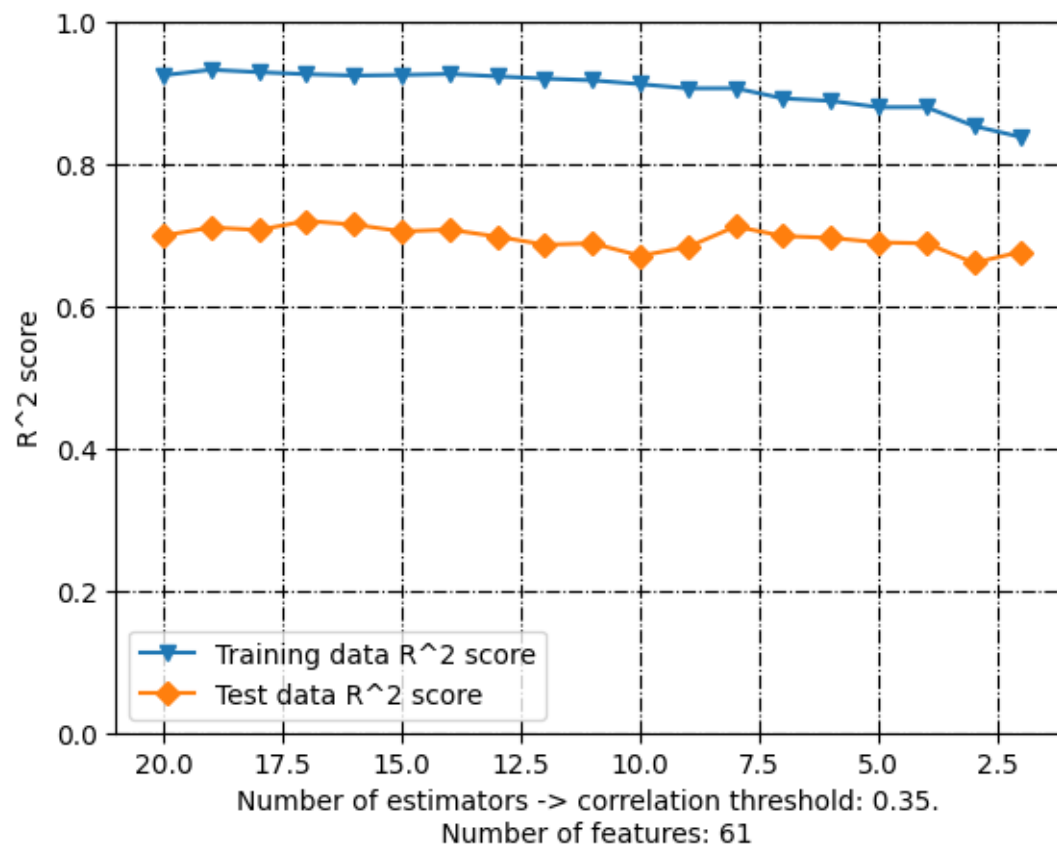



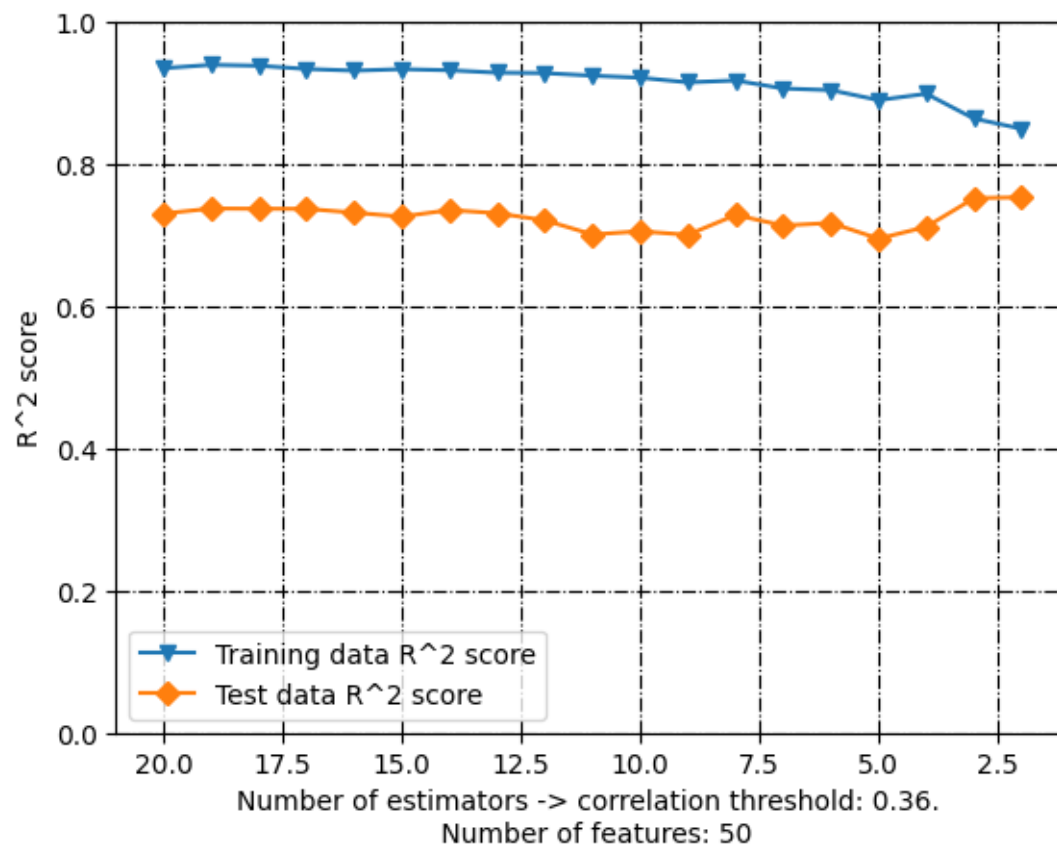

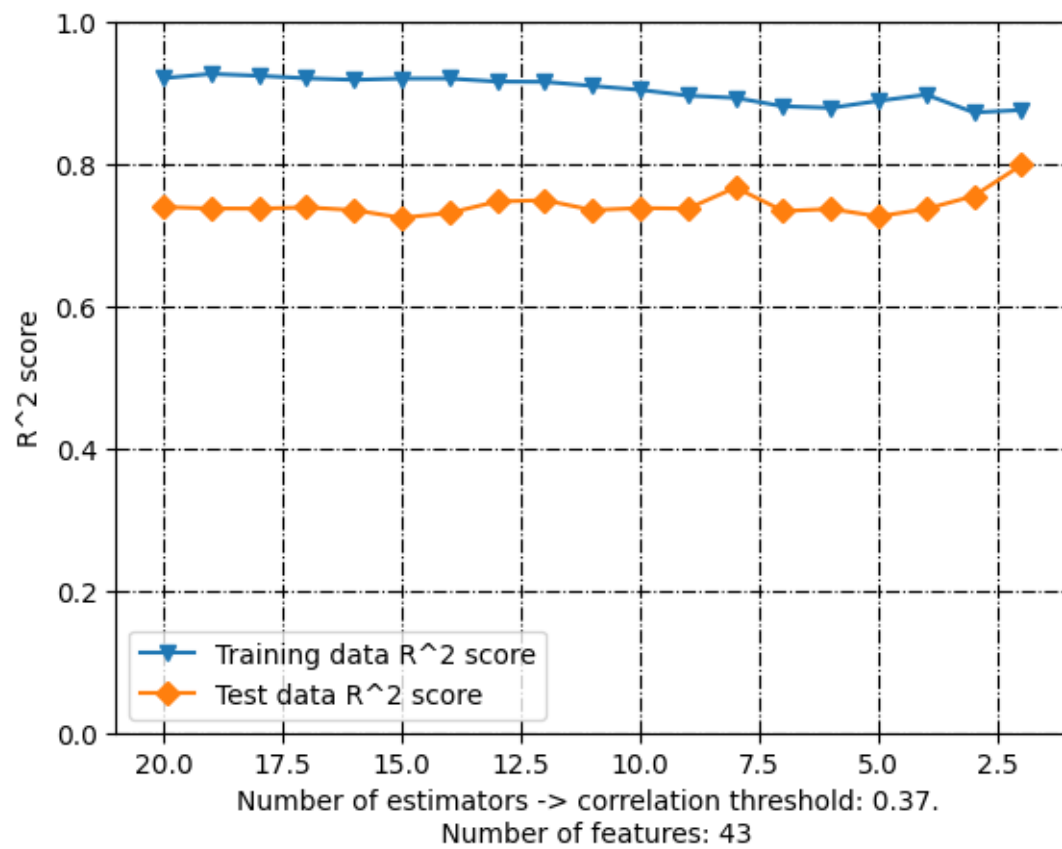

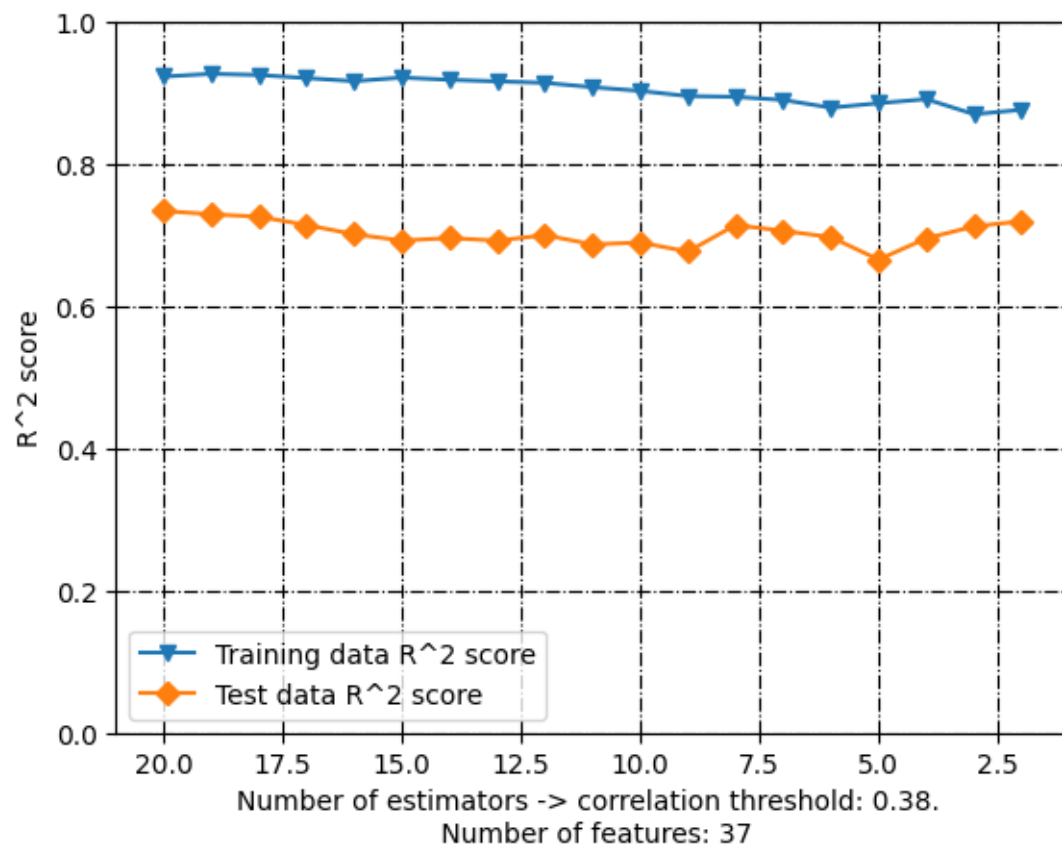

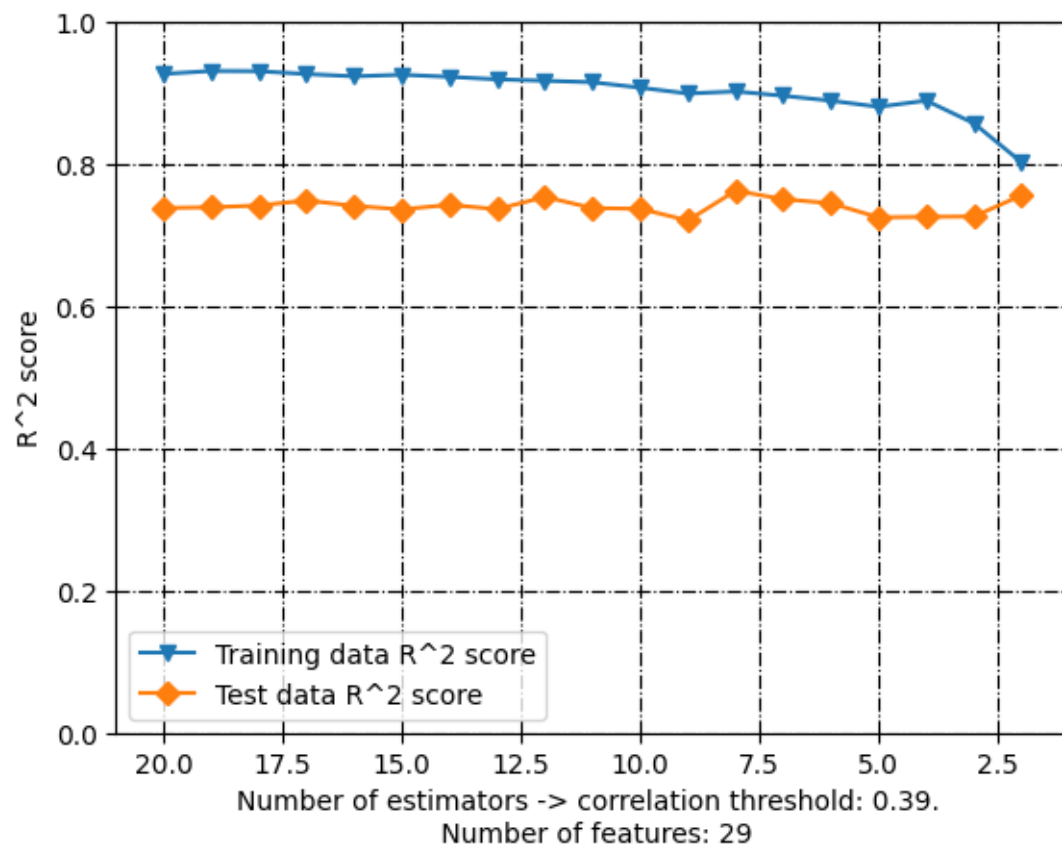

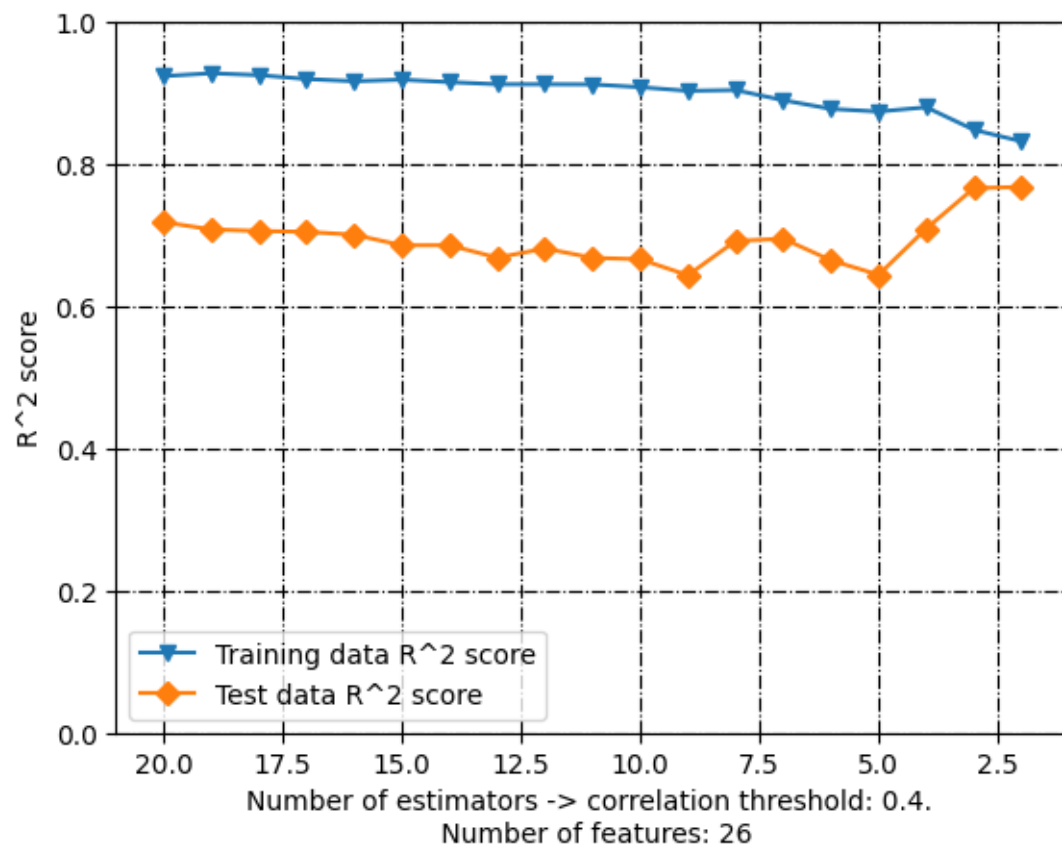

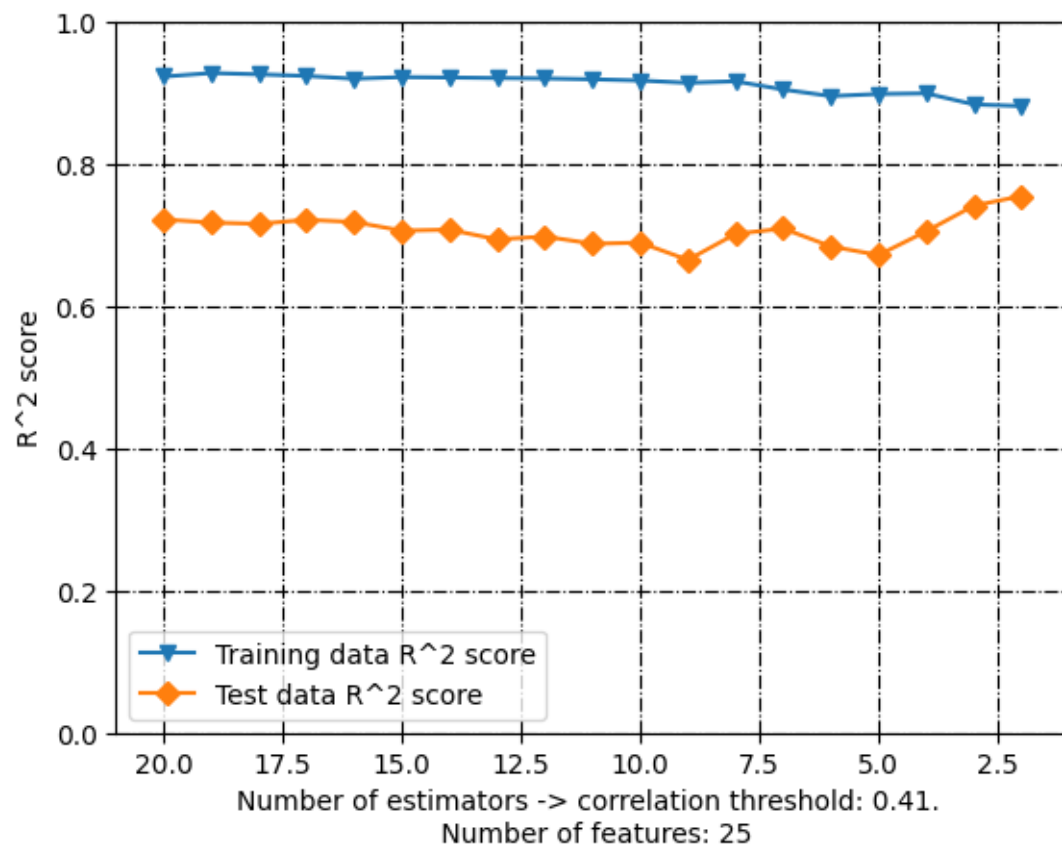

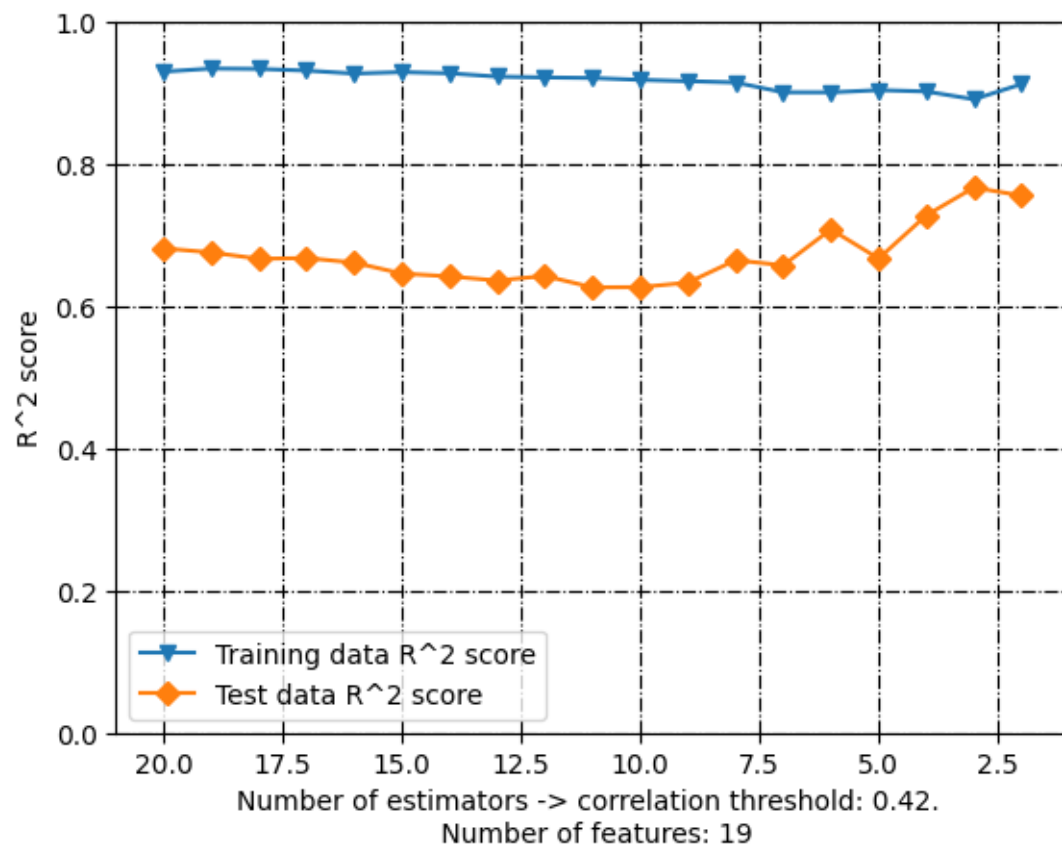

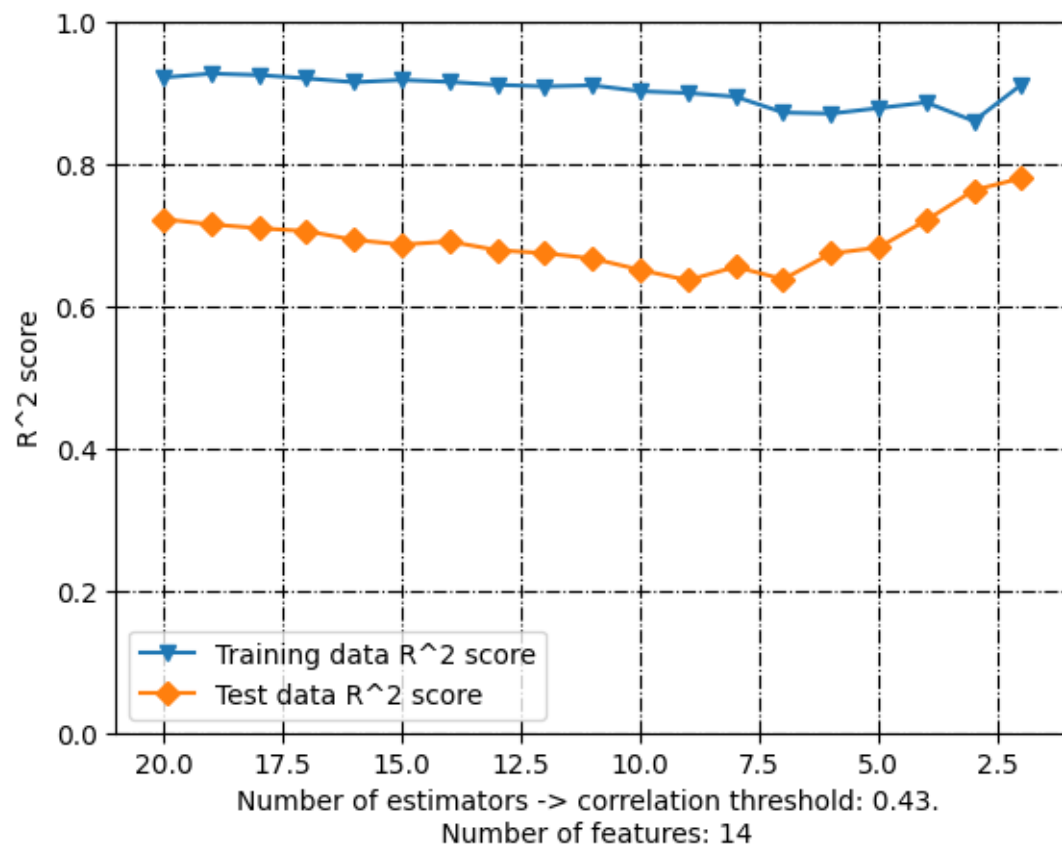



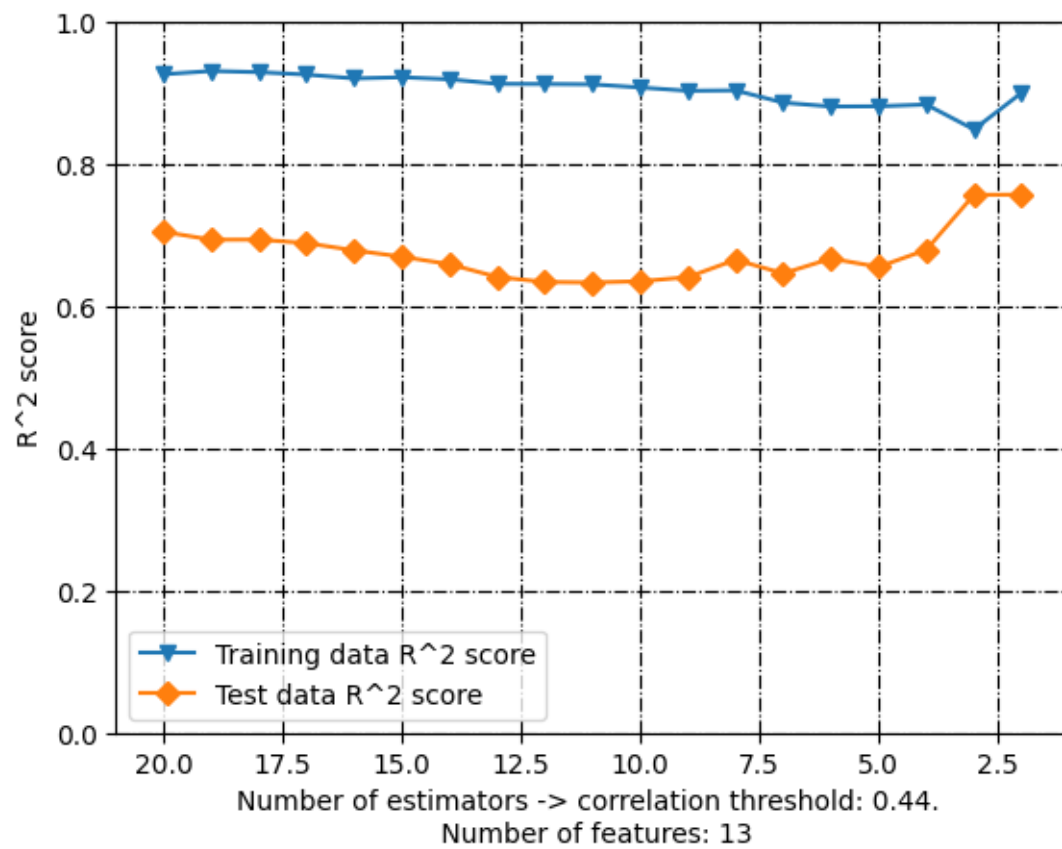

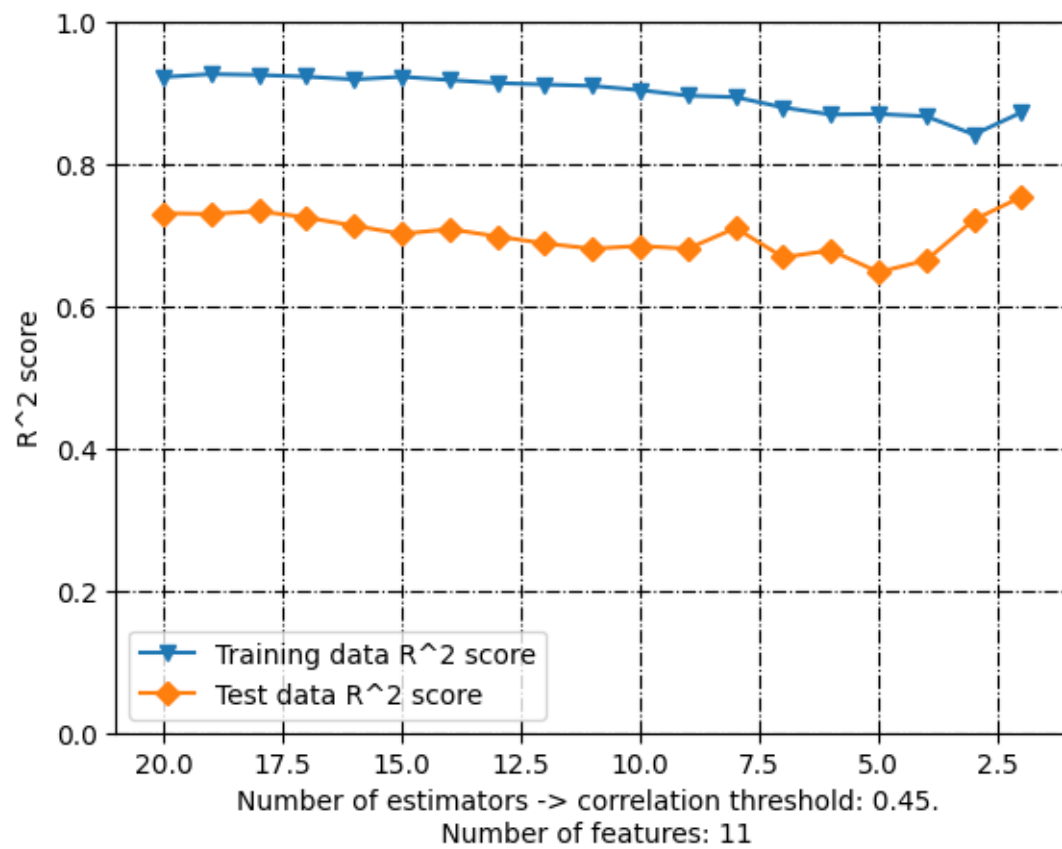

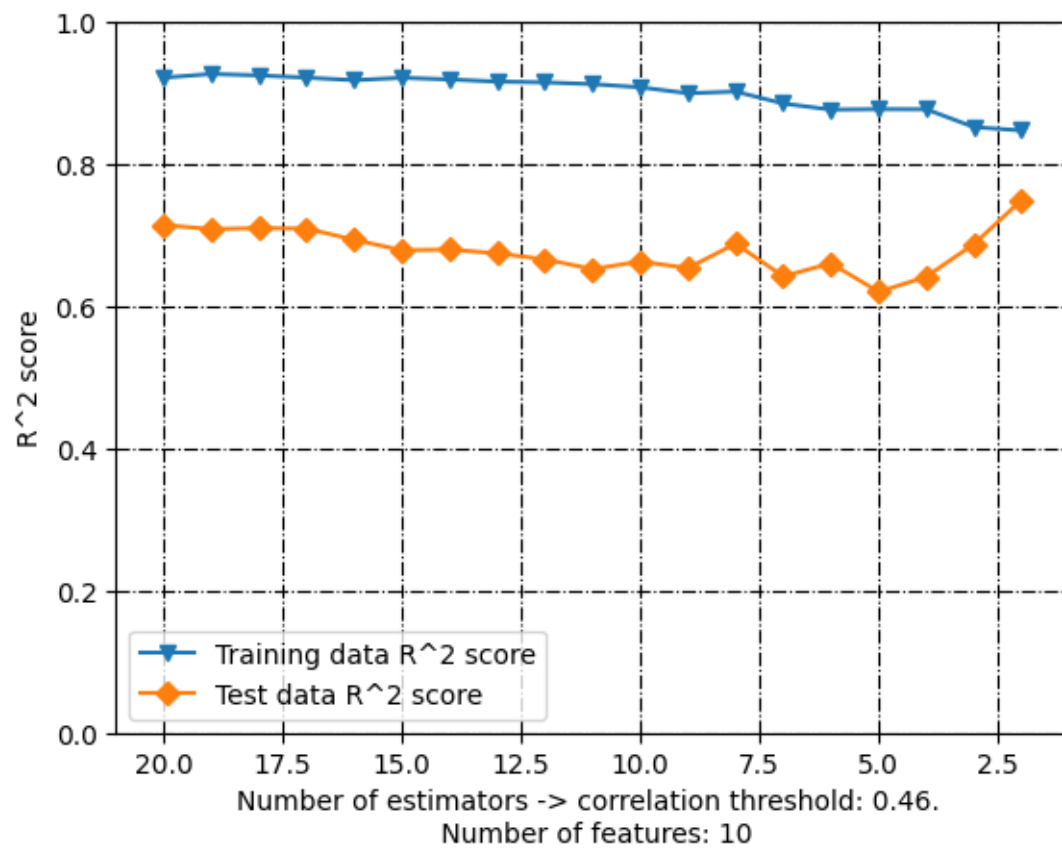

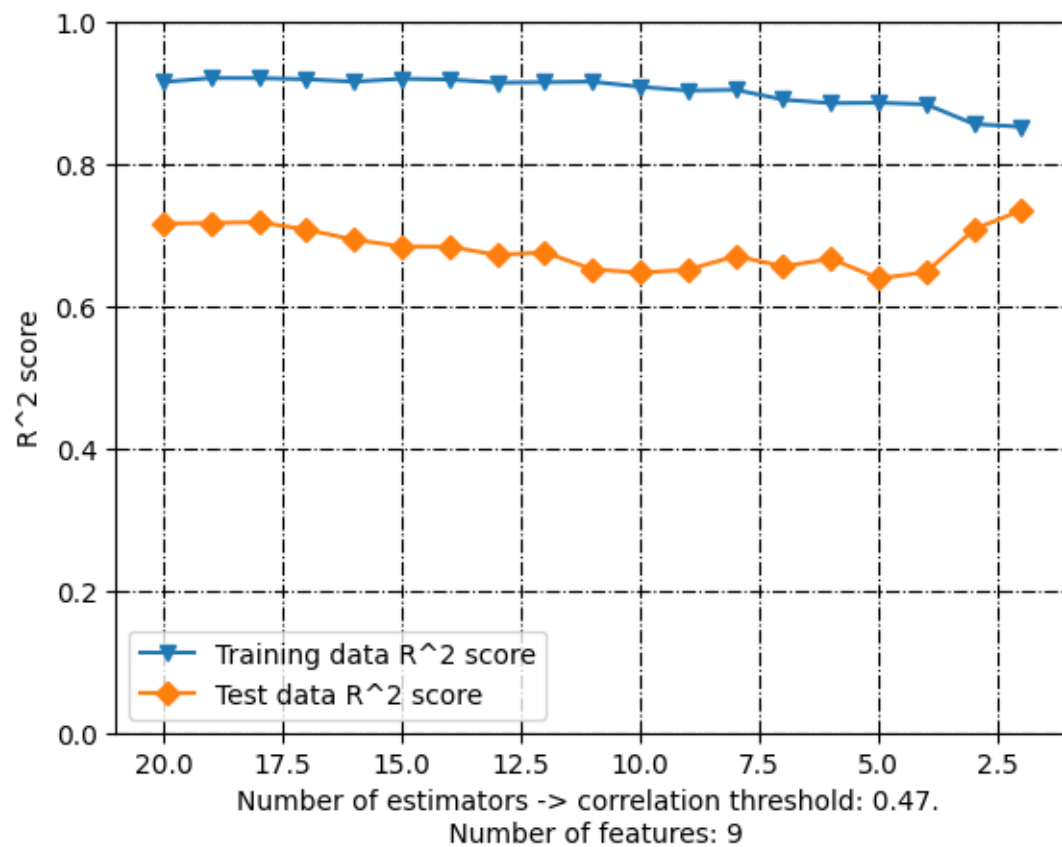

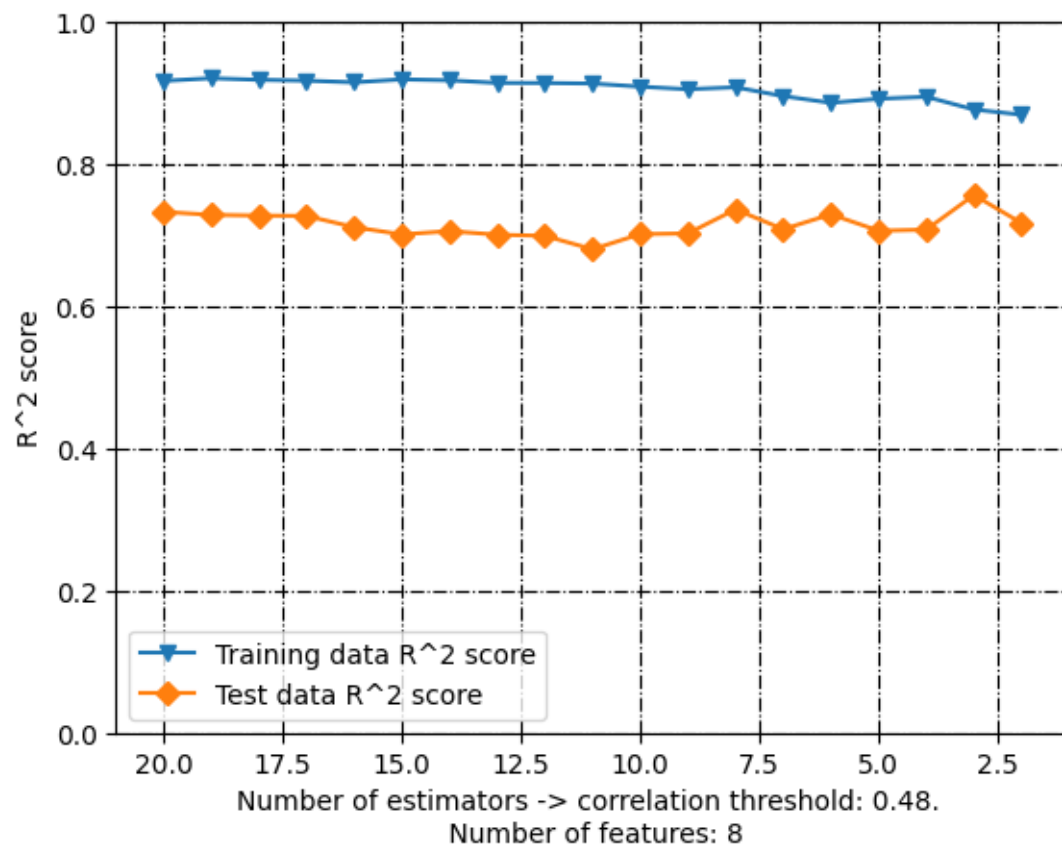

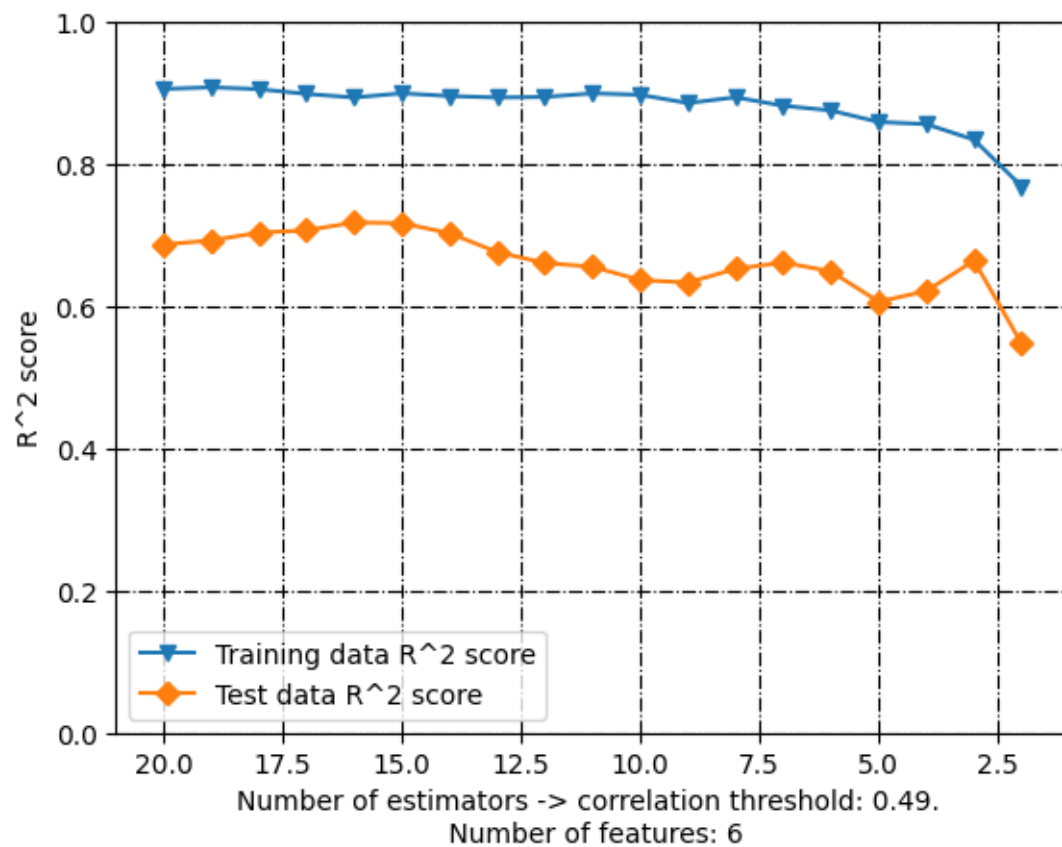

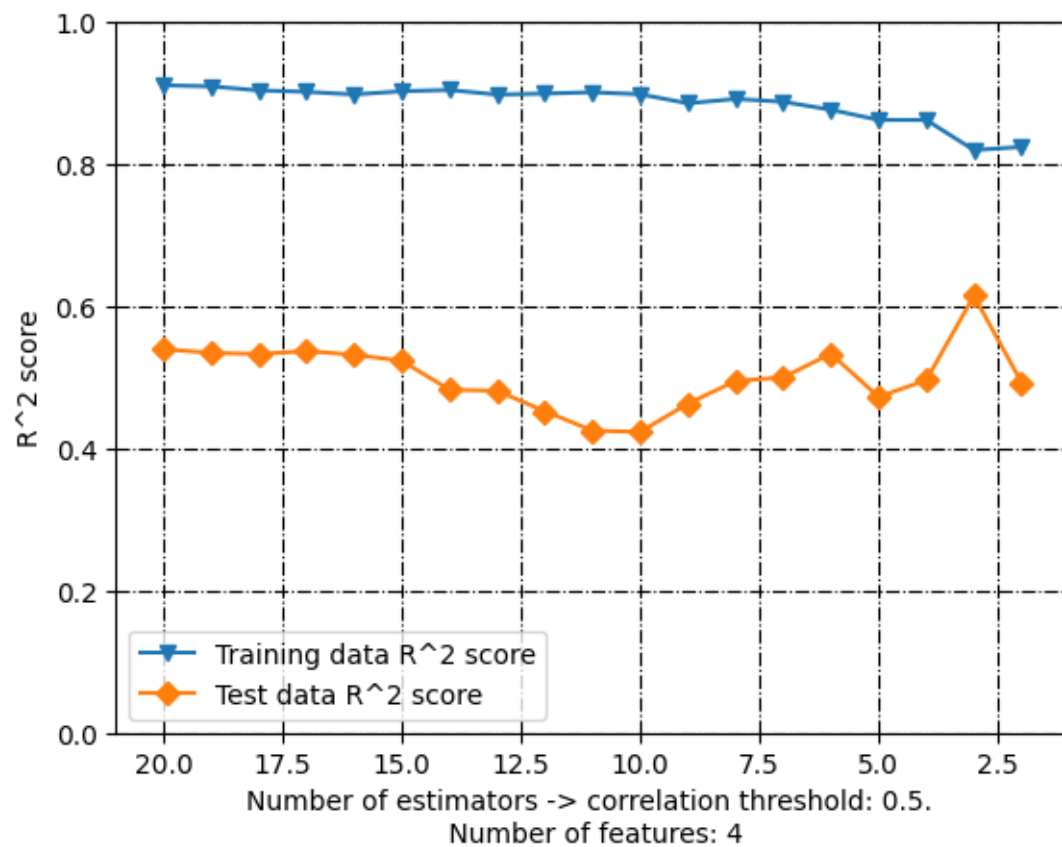

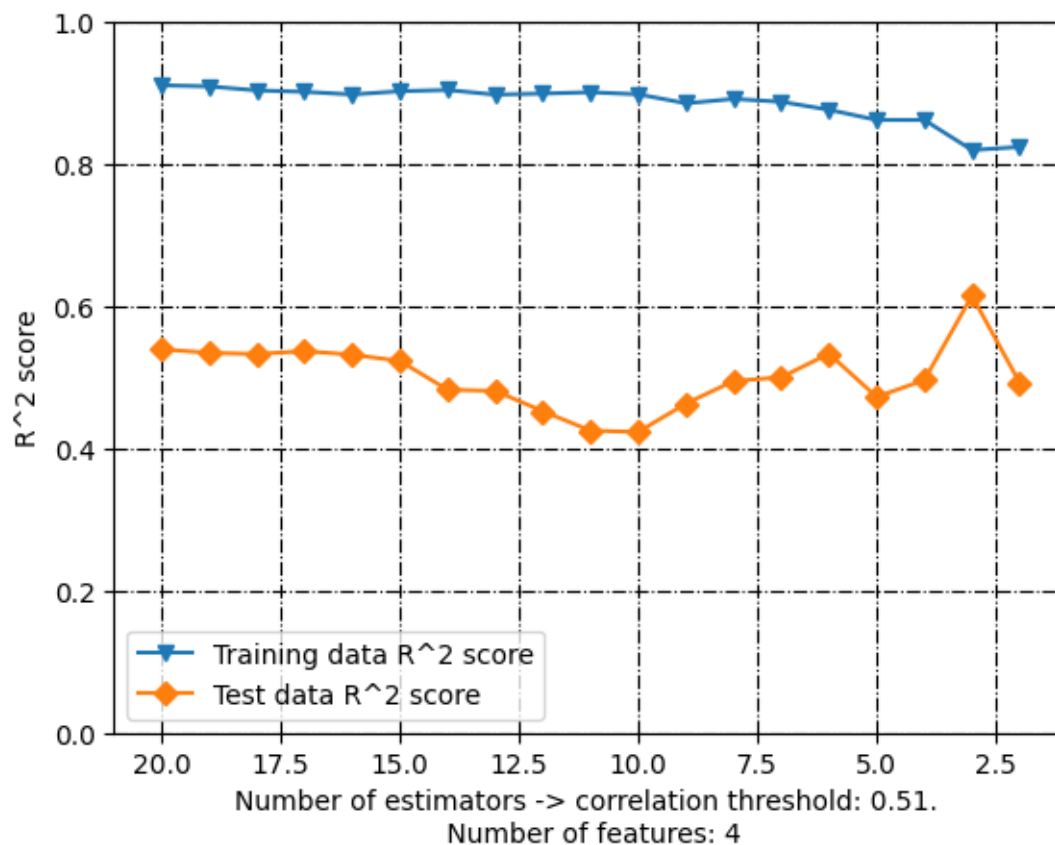

```
[28]: plt.plot(df_without_standardization['Correlation threshold'],  
             df_without_standardization['Number of features'], label = "Number of  
             features", marker='.')  
plt.legend()  
plt.xlabel('Correlation threshold')  
plt.ylabel('Number of features')  
plt.show()
```



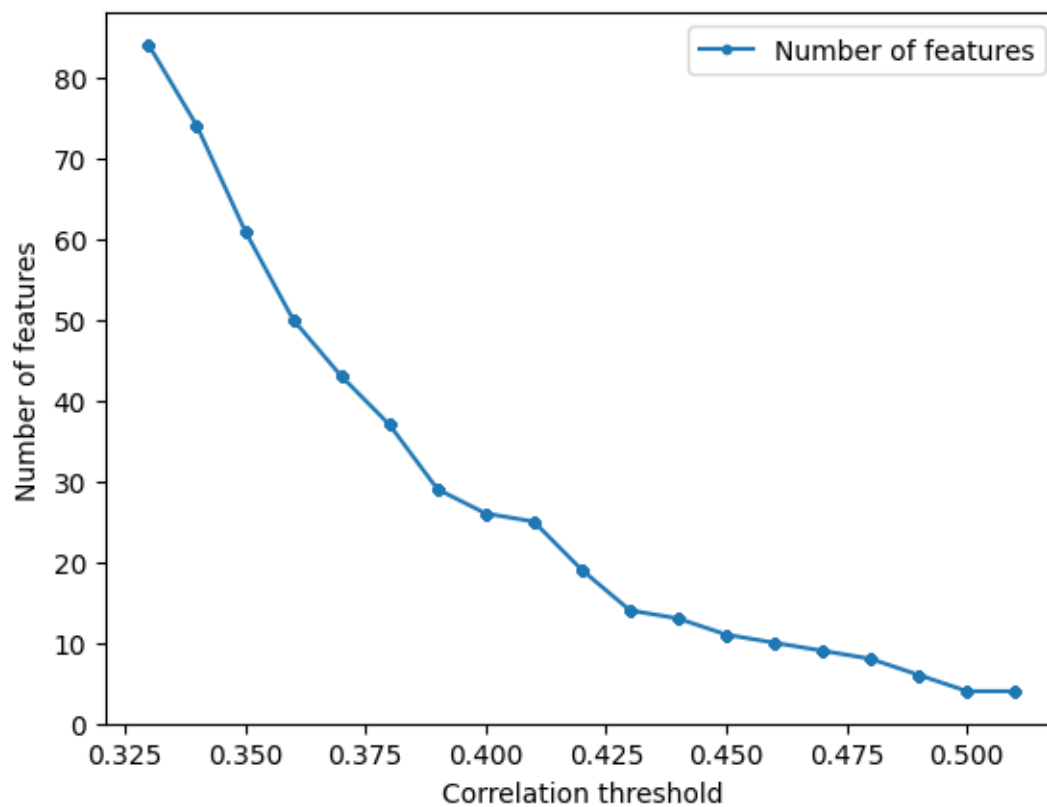

[ ]:

## 4 KNeighborsRegressor

```
[29]: without_standardization, train_r2_, test_r2_, hist1, hist2, target_column_name,
      ↪ training_data_RMSE, test_data_RMSE = pred_model.
      ↪ prepare_data_and_create_model(molecular_descriptors_df=data,
      ↪
      ↪         correlation_threshold=0.50,
      ↪
      ↪         standardization=False,
      ↪
      ↪         model_type='KNeighborsRegressor',
      ↪
      ↪         target_column_name = target,
      ↪
      ↪         random_state=random_state,
      ↪
      ↪         train_test_split_=True,
```



verbose=True)



I am not doing standardization...

```
molecular descriptor name
0          AATSOZ
1          AATSOare
2          AATSOd
3          AATSOdv
4          AATSOi
molecular descriptor name  corr_value
0          AATSOZ          -0.038502
1          AATSOare        -0.120847
2          AATSOd           0.041648
3          AATSOdv         -0.115899
4          AATSOi           0.191765
molecular descriptor name  corr_value  absolute correlation value
0          AATSOZ          -0.038502          0.038502
1          AATSOare        -0.120847          0.120847
2          AATSOd           0.041648          0.041648
3          AATSOdv         -0.115899          0.115899
4          AATSOi           0.191765          0.191765
molecular descriptor name  corr_value  absolute correlation value
226          AMID_0        -0.520578          0.520578
505          EState_VSA5   -0.578904          0.578904
506          EState_VSA6    0.519794          0.519794
791          MDEO-12       -0.525441          0.525441
1211         MCF-7         1.000000          1.000000
molecular descriptor name  corr_value  absolute correlation value
226          AMID_0        -0.520578          0.520578
505          EState_VSA5   -0.578904          0.578904
506          EState_VSA6    0.519794          0.519794
791          MDEO-12       -0.525441          0.525441
The model used is: KNeighbors...
Return the coefficient of determination of the prediction:
0.7633277638944249
R^2 score: 0.4926643581637682
Correlation coefficient: 0.701900532955894
Test data - unseen during training:
R^2 score: 0.7633277638944249
Correlation coefficient: 0.8736863074893786
[7.50043319 6.60652477 6.26345173 7.45309764 8.25480167 7.45309764
 8.03129323 7.58116176 8.03129323 8.03397726 6.85253149 8.27774543
 8.46138271 8.14325294 8.07271833 8.07271833 6.01407407 5.99312666]
102      7.958607
38       6.022276
8        5.949079
109      8.086186
```

```

11      8.013228
51      8.000000
88      8.119186
21      8.113509
82      7.982967
98      7.795880
58      7.677781
64      8.619789
74      8.327902
103     8.376751
91      9.154902
43      7.958607
25      4.949659
30      6.010550
Name: MCF-7, dtype: float64
Training Root Mean Square Error: 0.6626938503329243
Testing Root Mean Square Error: 0.5242083828149131

```

```

[30]: print(target_column_name+str('_transformed'))
      print(hist1[target_column_name].hist())

```

```

MCF-7_transformed
AxesSubplot(0.125,0.11;0.775x0.77)

```

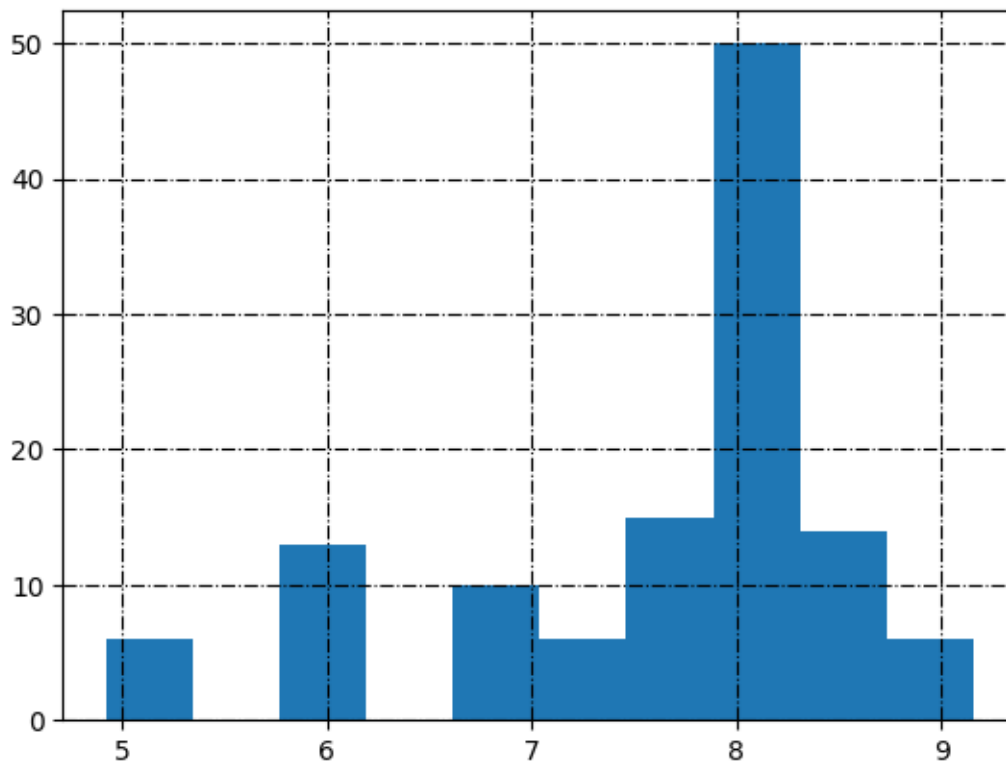

```
[31]: with_standardization, train_r2_, test_r2_, hist1, hist2, target_column_name,
      ↪ training_data_RMSE, test_data_RMSE = pred_model.
      ↪ prepare_data_and_create_model(molecular_descriptors_df=data,
      ↪
      ↪ correlation_threshold=0.50,
      ↪
      ↪ standardization=True,
      ↪
      ↪ model_type='KNeighborsRegressor',
      ↪
      ↪ target_column_name = target,
      ↪
      ↪ random_state=random_state,
      ↪
      ↪ train_test_split_=True,
      ↪
      ↪ verbose=True)
```

I am doing standardization...

|      | molecular descriptor name |            |                            |
|------|---------------------------|------------|----------------------------|
| 0    | AATSOZ                    |            |                            |
| 1    | AATSOare                  |            |                            |
| 2    | AATSOd                    |            |                            |
| 3    | AATSOdv                   |            |                            |
| 4    | AATSOi                    |            |                            |
|      | molecular descriptor name | corr_value |                            |
| 0    | AATSOZ                    | -0.038502  |                            |
| 1    | AATSOare                  | -0.120847  |                            |
| 2    | AATSOd                    | 0.041648   |                            |
| 3    | AATSOdv                   | -0.115899  |                            |
| 4    | AATSOi                    | 0.191765   |                            |
|      | molecular descriptor name | corr_value | absolute correlation value |
| 0    | AATSOZ                    | -0.038502  | 0.038502                   |
| 1    | AATSOare                  | -0.120847  | 0.120847                   |
| 2    | AATSOd                    | 0.041648   | 0.041648                   |
| 3    | AATSOdv                   | -0.115899  | 0.115899                   |
| 4    | AATSOi                    | 0.191765   | 0.191765                   |
|      | molecular descriptor name | corr_value | absolute correlation value |
| 226  | AMID_0                    | -0.520578  | 0.520578                   |
| 505  | EState_VSA5               | -0.578904  | 0.578904                   |
| 506  | EState_VSA6               | 0.519794   | 0.519794                   |
| 791  | MDEO-12                   | -0.525441  | 0.525441                   |
| 1211 | MCF-7                     | 1.000000   | 1.000000                   |
|      | molecular descriptor name | corr_value | absolute correlation value |
| 226  | AMID_0                    | -0.520578  | 0.520578                   |
| 505  | EState_VSA5               | -0.578904  | 0.578904                   |
| 506  | EState_VSA6               | 0.519794   | 0.519794                   |

```

791                MDE0-12    -0.525441                0.525441
The model used is: KNeighbors...
Return the coefficient of determination of the prediction:
0.7633277638944249
R^2 score: 0.4926643581637682
Correlation coefficient: 0.701900532955894
Test data - unseen during training:
R^2 score: 0.7633277638944249
Correlation coefficient: 0.8736863074893786
[7.50043319 6.60652477 6.26345173 7.45309764 8.25480167 7.45309764
 8.03129323 7.58116176 8.03129323 8.03397726 6.85253149 8.27774543
 8.46138271 8.14325294 8.07271833 8.07271833 6.01407407 5.99312666]
102      7.958607
38       6.022276
8        5.949079
109      8.086186
11       8.013228
51       8.000000
88       8.119186
21       8.113509
82       7.982967
98       7.795880
58       7.677781
64       8.619789
74       8.327902
103      8.376751
91       9.154902
43       7.958607
25       4.949659
30       6.010550
Name: MCF-7, dtype: float64
Training Root Mean Square Error: 0.6626938503329243
Testing Root Mean Square Error: 0.5242083828149131

```

#### 4.1 Search inside correlation space

```

[32]: step = 0.01
initial_step = corr_low
last_step = corr_high
first_list = [x / 100.0 for x in range(int(initial_step*100),
    ↪int(last_step*100), int(step*100))]
second_list = []
third_list = []
fourth_l = []
fifth_l = []
f_list = []
for i in first_list:

```

```

        without_standardization, train_r2, test_r2, _, h_, target_column_name,
        training_data_RMSE, test_data_RMSE = pred_model.
        prepare_data_and_create_model(molecular_descriptors_df = data,

        correlation_threshold = i,

        standardization = False,

        model_type = 'KNeighborsRegressor',

        target_column_name = target,

        random_state=random_state,

        train_test_split_ = True,

        verbose = False)
    second_list.append(train_r2)
    third_list.append(test_r2)
    fourth_l.append(training_data_RMSE)
    fifth_l.append(test_data_RMSE)
    f_list.append(len(h_))

```

File "C:\Users\aleks\anaconda3\envs\cheminf\_gpu\lib\site-packages\joblib\externals\loky\backend\context.py", line 217, in \_count\_physical\_cores  
 raise ValueError(

```

[33]: df_without_standardization = pd.DataFrame(data=first_list,
        columns=["Correlation threshold"])
df_without_standardization['Training data R^2 score'] = second_list
df_without_standardization['Test data R^2 score'] = third_list
df_without_standardization['Training RMSE'] = fourth_l
df_without_standardization['Test RMSE'] = fifth_l
df_without_standardization['Number of features'] = f_list

```

```

[34]: df_k_nearest = df_without_standardization.copy()
df_without_standardization

```

```

[34]:
Correlation threshold  Training data R^2 score  Test data R^2 score \
0                    0.33                    0.570572          0.678929
1                    0.34                    0.572739          0.678929
2                    0.35                    0.572509          0.671096
3                    0.36                    0.574874          0.670597
4                    0.37                    0.561600          0.671880
5                    0.38                    0.659618          0.649241
6                    0.39                    0.663855          0.643022

```

|    |      |          |          |
|----|------|----------|----------|
| 7  | 0.40 | 0.658443 | 0.737529 |
| 8  | 0.41 | 0.665939 | 0.658555 |
| 9  | 0.42 | 0.559293 | 0.784286 |
| 10 | 0.43 | 0.531276 | 0.790893 |
| 11 | 0.44 | 0.531276 | 0.790893 |
| 12 | 0.45 | 0.531276 | 0.773425 |
| 13 | 0.46 | 0.538330 | 0.815329 |
| 14 | 0.47 | 0.538330 | 0.815329 |
| 15 | 0.48 | 0.538511 | 0.815329 |
| 16 | 0.49 | 0.519802 | 0.803034 |
| 17 | 0.50 | 0.492664 | 0.763328 |
| 18 | 0.51 | 0.492664 | 0.763328 |

|    | Training RMSE | Test RMSE | Number of features |
|----|---------------|-----------|--------------------|
| 0  | 0.609692      | 0.610564  | 84                 |
| 1  | 0.608152      | 0.610564  | 74                 |
| 2  | 0.608316      | 0.617966  | 61                 |
| 3  | 0.606630      | 0.618435  | 50                 |
| 4  | 0.616028      | 0.617230  | 43                 |
| 5  | 0.542811      | 0.638168  | 37                 |
| 6  | 0.539422      | 0.643800  | 29                 |
| 7  | 0.543747      | 0.552041  | 26                 |
| 8  | 0.537747      | 0.629637  | 25                 |
| 9  | 0.617647      | 0.500460  | 19                 |
| 10 | 0.636977      | 0.492736  | 14                 |
| 11 | 0.636977      | 0.492736  | 13                 |
| 12 | 0.636977      | 0.512904  | 11                 |
| 13 | 0.632166      | 0.463052  | 10                 |
| 14 | 0.632166      | 0.463052  | 9                  |
| 15 | 0.632042      | 0.463052  | 8                  |
| 16 | 0.644727      | 0.478218  | 6                  |
| 17 | 0.662694      | 0.524208  | 4                  |
| 18 | 0.662694      | 0.524208  | 4                  |

## 4.2 Plots

```
[35]: plt.plot(df_without_standardization['Correlation threshold'],
             df_without_standardization['Training data R^2 score'], label = "Training
             data R^2 score", marker='v')
plt.plot(df_without_standardization['Correlation threshold'],
             df_without_standardization['Test data R^2 score'], label = "Test data R^2
             score", marker='D')
plt.legend()
plt.xlabel('Correlation threshold')
plt.ylabel('R^2 score')
plt.ylim([0, 1])
plt.show()
```

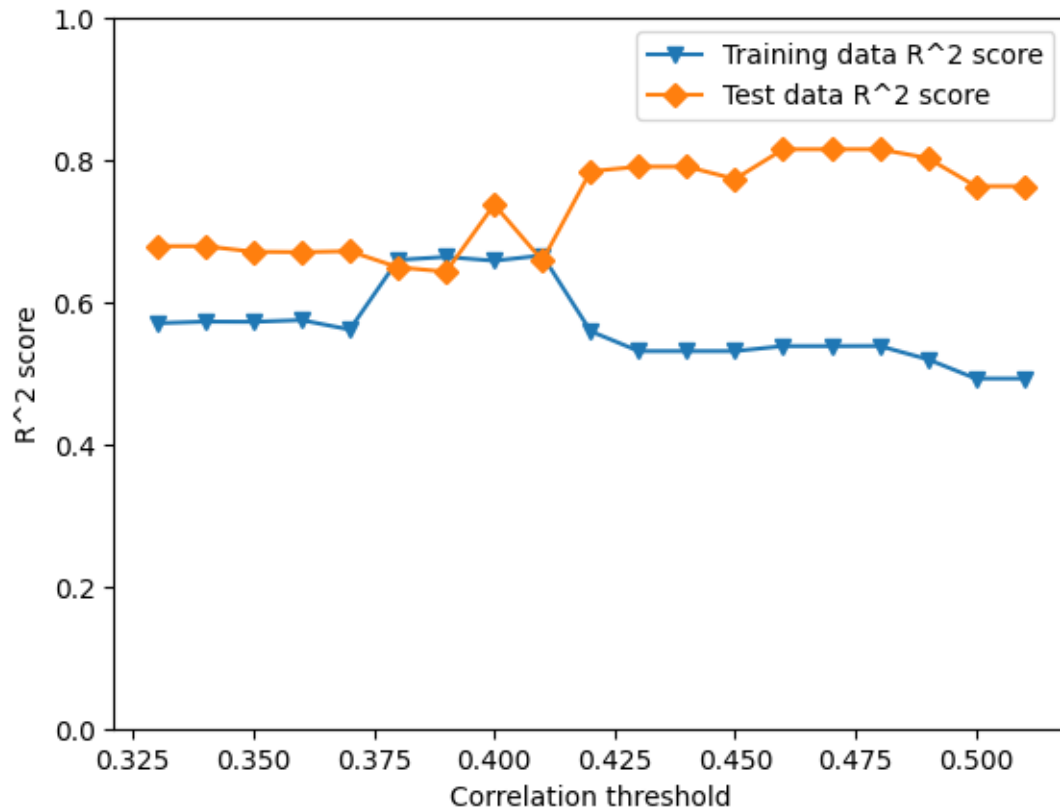

```
[36]: plt.plot(df_without_standardization['Correlation threshold'],
             df_without_standardization['Number of features'], label = "Number of
             features", marker='.')
plt.legend()
plt.xlabel('Correlation threshold')
plt.ylabel('Number of features')
plt.show()
```



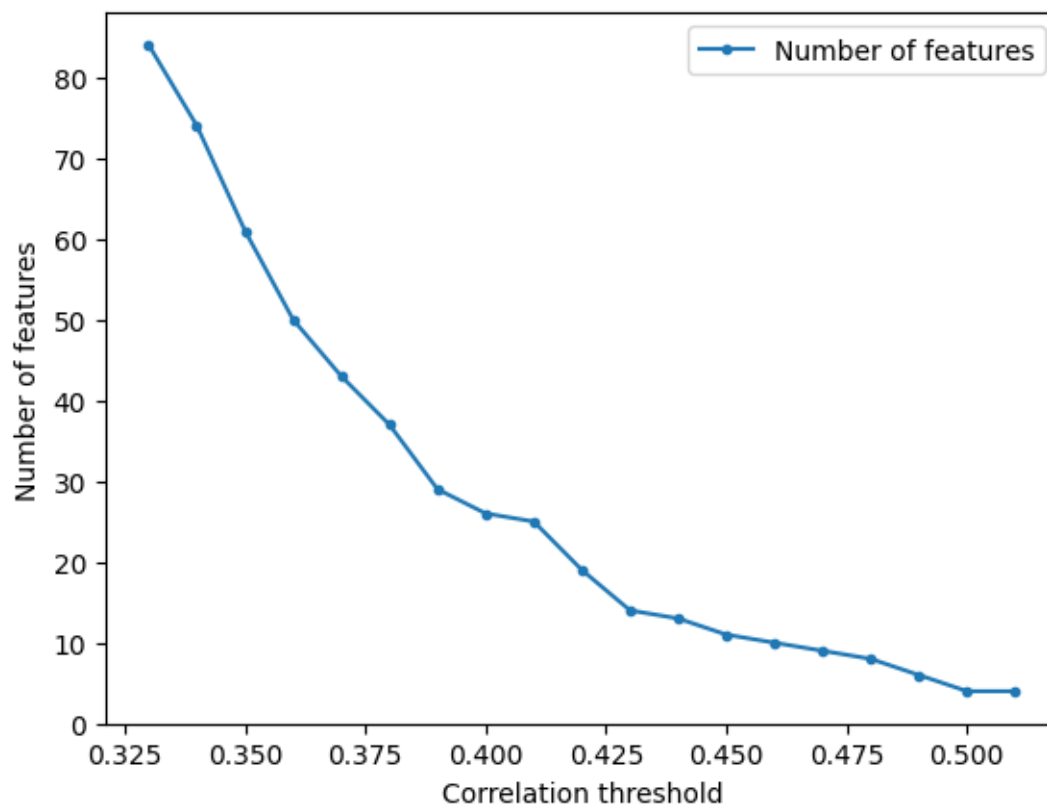

[ ]:

## 5 Support Vector Machines (SVM)

```
[37]: without_standardization, train_r2_, test_r2_, hist1, hist2, target_column_name,
      ↪ training_data_RMSE, test_data_RMSE = pred_model.
      ↪ prepare_data_and_create_model(molecular_descriptors_df=data,
      ↪
      ↪         correlation_threshold=0.50,
      ↪
      ↪         standardization=False,
      ↪
      ↪         model_type='SVR',
      ↪
      ↪         kernel_ = 'linear',
      ↪
      ↪         gamma_ = 'auto',
      ↪
      ↪         target_column_name = target,
```

```

    random_state=random_state,

    train_test_split_=True,

    verbose=True)

```

I am not doing standardization...

```

molecular descriptor name
0          AATSOZ
1          AATSOare
2          AATSOd
3          AATSOdv
4          AATSOi
molecular descriptor name  corr_value
0          AATSOZ      -0.038502
1          AATSOare    -0.120847
2          AATSOd      0.041648
3          AATSOdv     -0.115899
4          AATSOi      0.191765
molecular descriptor name  corr_value  absolute correlation value
0          AATSOZ      -0.038502          0.038502
1          AATSOare    -0.120847          0.120847
2          AATSOd      0.041648          0.041648
3          AATSOdv     -0.115899          0.115899
4          AATSOi      0.191765          0.191765
molecular descriptor name  corr_value  absolute correlation value
226          AMID_0      -0.520578          0.520578
505          EState_VSA5 -0.578904          0.578904
506          EState_VSA6  0.519794          0.519794
791          MDEO-12     -0.525441          0.525441
1211         MCF-7       1.000000          1.000000
molecular descriptor name  corr_value  absolute correlation value
226          AMID_0      -0.520578          0.520578
505          EState_VSA5 -0.578904          0.578904
506          EState_VSA6  0.519794          0.519794
791          MDEO-12     -0.525441          0.525441
The model used is: SVR...
Return the coefficient of determination of the prediction:
0.6626155081380332
R^2 score: 0.4817882148371915
Correlation coefficient: 0.6941096562051211
Test data - unseen during training:
R^2 score: 0.6626155081380332
Correlation coefficient: 0.814011982797571
[7.83359725 6.16673987 7.24549289 8.09382641 7.95363952 8.08726971
 7.9732951  7.7016262  7.97497772 8.07261823 7.35817285 8.33987507

```

```

7.8022178  8.32059965 7.96754886 7.96886225 6.67229675 5.5439242 ]
102      7.958607
38       6.022276
8        5.949079
109      8.086186
11       8.013228
51       8.000000
88       8.119186
21       8.113509
82       7.982967
98       7.795880
58       7.677781
64       8.619789
74       8.327902
103      8.376751
91       9.154902
43       7.958607
25       4.949659
30       6.010550

```

Name: MCF-7, dtype: float64

Training Root Mean Square Error: 0.6697595212937382

Testing Root Mean Square Error: 0.6258825778146967

```

[38]: print(target_column_name+str('_transformed'))
      print(hist1[target_column_name].hist())

```

MCF-7\_transformed

AxesSubplot(0.125,0.11;0.775x0.77)

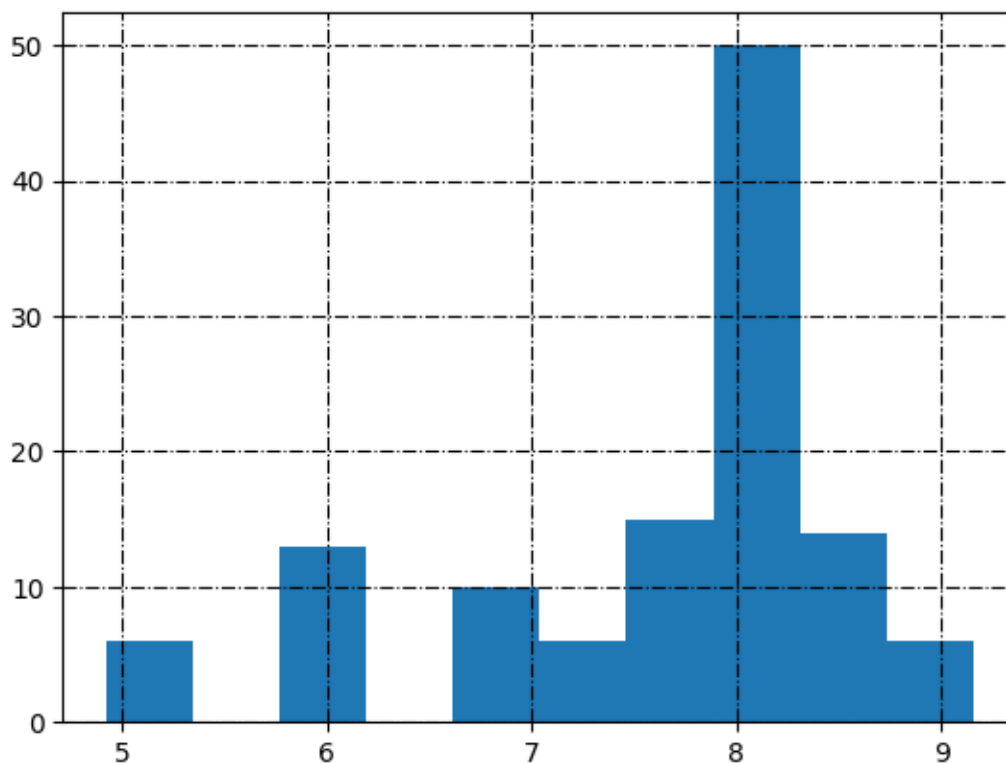

```
[39]: with_standardization, train_r2_, test_r2_, hist1, hist2, target_column_name,
      ↪ training_data_RMSE, test_data_RMSE = pred_model.
      ↪ prepare_data_and_create_model(molecular_descriptors_df=data,
      ↪
      ↪         correlation_threshold=0.50,
      ↪
      ↪         standardization=True,
      ↪
      ↪         model_type='SVR',
      ↪
      ↪         kernel_ = 'linear',
      ↪
      ↪         gamma_ = 'auto',
      ↪
      ↪         target_column_name = target,
      ↪
      ↪         random_state=random_state,
      ↪
      ↪         train_test_split_=True,
      ↪
      ↪         verbose=True)
```

I am doing standardization...

molecular descriptor name

|   |          |
|---|----------|
| 0 | AATSOZ   |
| 1 | AATSOare |
| 2 | AATSOd   |
| 3 | AATSOdv  |
| 4 | AATSOi   |

|   | molecular descriptor name | corr_value |
|---|---------------------------|------------|
| 0 | AATSOZ                    | -0.038502  |
| 1 | AATSOare                  | -0.120847  |
| 2 | AATSOd                    | 0.041648   |
| 3 | AATSOdv                   | -0.115899  |
| 4 | AATSOi                    | 0.191765   |

|   | molecular descriptor name | corr_value | absolute correlation value |
|---|---------------------------|------------|----------------------------|
| 0 | AATSOZ                    | -0.038502  | 0.038502                   |
| 1 | AATSOare                  | -0.120847  | 0.120847                   |
| 2 | AATSOd                    | 0.041648   | 0.041648                   |
| 3 | AATSOdv                   | -0.115899  | 0.115899                   |
| 4 | AATSOi                    | 0.191765   | 0.191765                   |

|      | molecular descriptor name | corr_value | absolute correlation value |
|------|---------------------------|------------|----------------------------|
| 226  | AMID_0                    | -0.520578  | 0.520578                   |
| 505  | EState_VSA5               | -0.578904  | 0.578904                   |
| 506  | EState_VSA6               | 0.519794   | 0.519794                   |
| 791  | MDEO-12                   | -0.525441  | 0.525441                   |
| 1211 | MCF-7                     | 1.000000   | 1.000000                   |

|     | molecular descriptor name | corr_value | absolute correlation value |
|-----|---------------------------|------------|----------------------------|
| 226 | AMID_0                    | -0.520578  | 0.520578                   |
| 505 | EState_VSA5               | -0.578904  | 0.578904                   |
| 506 | EState_VSA6               | 0.519794   | 0.519794                   |
| 791 | MDEO-12                   | -0.525441  | 0.525441                   |

The model used is: SVR...

Return the coefficient of determination of the prediction:

0.6626155081380332

R<sup>2</sup> score: 0.4817882148371915

Correlation coefficient: 0.6941096562051211

Test data - unseen during training:

R<sup>2</sup> score: 0.6626155081380332

Correlation coefficient: 0.814011982797571

[7.83359725 6.16673987 7.24549289 8.09382641 7.95363952 8.08726971  
7.9732951 7.7016262 7.97497772 8.07261823 7.35817285 8.33987507  
7.8022178 8.32059965 7.96754886 7.96886225 6.67229675 5.5439242 ]

|     |          |
|-----|----------|
| 102 | 7.958607 |
| 38  | 6.022276 |
| 8   | 5.949079 |
| 109 | 8.086186 |
| 11  | 8.013228 |
| 51  | 8.000000 |
| 88  | 8.119186 |

```

21      8.113509
82      7.982967
98      7.795880
58      7.677781
64      8.619789
74      8.327902
103     8.376751
91      9.154902
43      7.958607
25      4.949659
30      6.010550
Name: MCF-7, dtype: float64
Training Root Mean Square Error: 0.6697595212937382
Testing Root Mean Square Error: 0.6258825778146967

```

## 5.1 Search inside correlation space

```

[40]: step = 0.01
      initial_step = corr_low
      last_step = corr_high
      first_list = [x / 100.0 for x in range(int(initial_step*100),
      ↪int(last_step*100), int(step*100))]
      second_list = []
      third_list = []
      fourth_l = []
      fifth_l = []
      f_list = []
      for i in first_list:
          without_standardization, train_r2, test_r2, _, h_, target_column_name,
          ↪training_data_RMSE, test_data_RMSE = pred_model.
          ↪prepare_data_and_create_model(molecular_descriptors_df = data,

          ↪
          correlation_threshold = i,

          ↪
          standardization = False,

          ↪
          model_type = 'SVR',

          ↪
          kernel_ = 'linear',

          ↪
          gamma_ = 'auto',

          ↪
          target_column_name = target,

          ↪
          random_state=random_state,

          ↪
          train_test_split_ = True,

```

```

        verbose = False)
    second_list.append(train_r2)
    third_list.append(test_r2)
    fourth_l.append(training_data_RMSE)
    fifth_l.append(test_data_RMSE)
    f_list.append(len(h_))

```

```

[41]: df_without_standardization = pd.DataFrame(data=first_list,
        ↪columns=["Correlation threshold"])
df_without_standardization['Training data R^2 score'] = second_list
df_without_standardization['Test data R^2 score'] = third_list
df_without_standardization['Training RMSE'] = fourth_l
df_without_standardization['Test RMSE'] = fifth_l
df_without_standardization['Number of features'] = f_list

```

```

[42]: df_svm = df_without_standardization.copy()
df_without_standardization

```

```

[42]:
Correlation threshold  Training data R^2 score  Test data R^2 score \
0                    0.33                    0.706721          0.711733
1                    0.34                    0.704253          0.718611
2                    0.35                    0.659778          0.599273
3                    0.36                    0.608444          0.529254
4                    0.37                    0.599551          0.541794
5                    0.38                    0.582890          0.595559
6                    0.39                    0.562359          0.600633
7                    0.40                    0.570156          0.616687
8                    0.41                    0.569599          0.616421
9                    0.42                    0.550841          0.558076
10                   0.43                    0.512317          0.624487
11                   0.44                    0.511461          0.622026
12                   0.45                    0.512574          0.622415
13                   0.46                    0.489160          0.620354
14                   0.47                    0.489987          0.624133
15                   0.48                    0.489131          0.626263
16                   0.49                    0.486902          0.597167
17                   0.50                    0.481788          0.662616
18                   0.51                    0.481788          0.662616

```

```

Training RMSE  Test RMSE  Number of features
0          0.503855    0.578532             84
1          0.505971    0.571589             74
2          0.542684    0.682110             61
3          0.582187    0.739305             50
4          0.588761    0.729392             43
5          0.600884    0.685264             37

```

|    |          |          |    |
|----|----------|----------|----|
| 6  | 0.615495 | 0.680952 | 29 |
| 7  | 0.609987 | 0.667125 | 26 |
| 8  | 0.610383 | 0.667356 | 25 |
| 9  | 0.623542 | 0.716315 | 19 |
| 10 | 0.649732 | 0.660302 | 14 |
| 11 | 0.650302 | 0.662463 | 13 |
| 12 | 0.649560 | 0.662122 | 11 |
| 13 | 0.664979 | 0.663926 | 10 |
| 14 | 0.664440 | 0.660614 | 9  |
| 15 | 0.664998 | 0.658739 | 8  |
| 16 | 0.666447 | 0.683900 | 6  |
| 17 | 0.669760 | 0.625883 | 4  |
| 18 | 0.669760 | 0.625883 | 4  |

## 5.2 Plots

```
[43]: plt.plot(df_without_standardization['Correlation threshold'],
             df_without_standardization['Training data R^2 score'], label = "Training
             data R^2 score", marker='v')
plt.plot(df_without_standardization['Correlation threshold'],
             df_without_standardization['Test data R^2 score'], label = "Test data R^2
             score", marker='D')
plt.legend()
plt.xlabel('Correlation threshold')
plt.ylabel('R^2 score')
plt.ylim([0, 1])
plt.show()
```



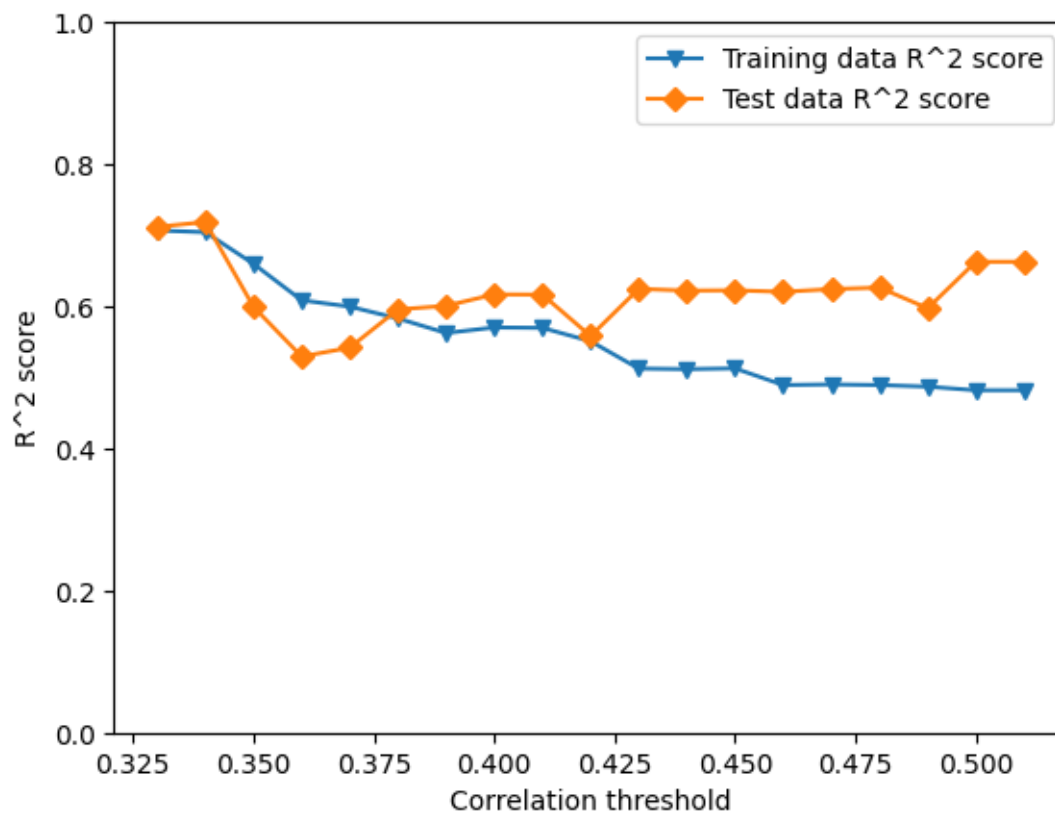

```
[44]: plt.plot(df_without_standardization['Correlation threshold'],
             df_without_standardization['Number of features'], label = "Number of
             features", marker='.')
plt.legend()
plt.xlabel('Correlation threshold')
plt.ylabel('Number of features')
plt.show()
```

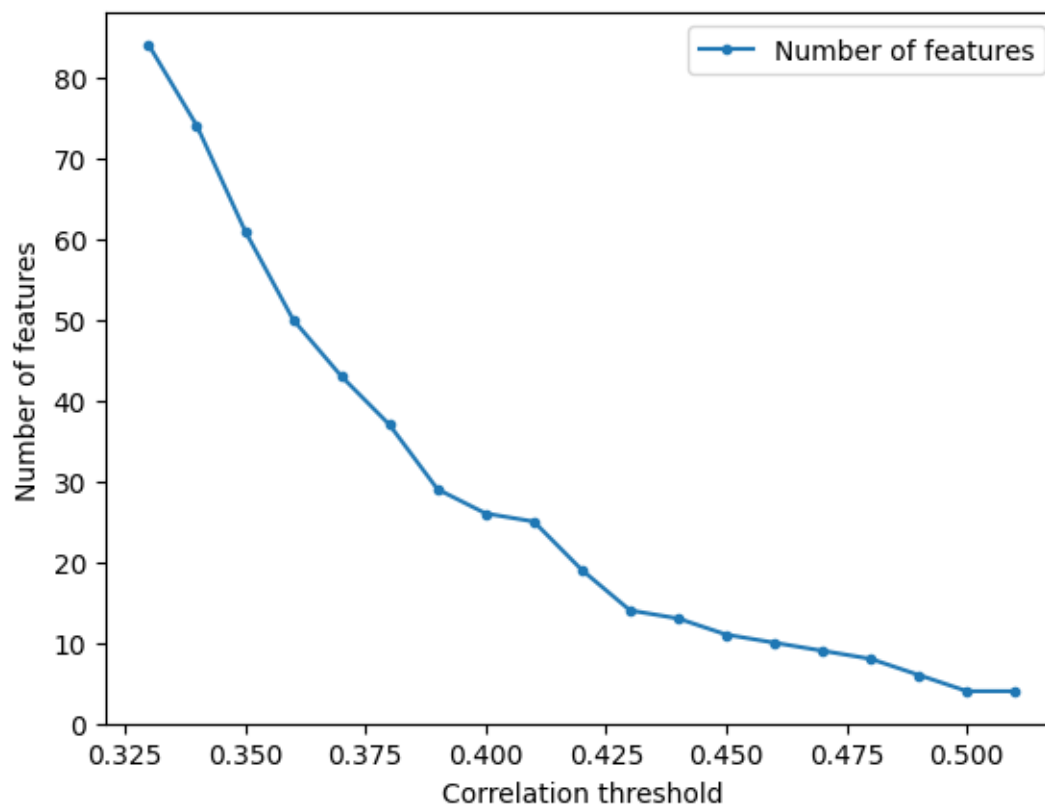

### 5.3 Store quality measurements

```
[45]: with pd.ExcelWriter('../Data/Quality_'+str(target)+'_'+str(random_state)+'_'.  
      ↪ 'xlsx') as writer:  
      df_linear.to_excel(writer, sheet_name='MLR')  
      df_decision_tree.to_excel(writer, sheet_name='DT')  
      df_random_forest.to_excel(writer, sheet_name='RF')  
      df_k_nearest.to_excel(writer, sheet_name='KNN')  
      df_svm.to_excel(writer, sheet_name='SVM')
```

# Notebook

January 18, 2024

## 1 File 28

```
[1]: import sys
from pathlib import Path
prediction_mode_path = Path("../module")
sys.path.append(prediction_mode_path.as_posix())
import models_creation as pred_model

import pandas as pd
import numpy as np

from sklearn.metrics import r2_score

import matplotlib.pyplot as plt
from sklearn.tree import plot_tree

from matplotlib import pyplot as plt

import joblib

import warnings
warnings.filterwarnings('ignore')
```

```
[2]: load_prepared_data = pd.read_excel('../Data/Kolchicyna_machine_learning.xlsx')
load_prepared_data = load_prepared_data.drop(columns=['Unnamed: 0'])

target = 'MCF-7'

corr_low = 0.33
corr_high = 0.525

random_state = 28
```

```
[3]: load_prepared_data.head()
```

```
[3]:      AATSOZ  AATSOare  AATSOd  AATSOdv  AATSOi  AATSOm  AATSOp  \
0  25.090909  6.046518  3.109091  6.662626  160.775045  99.075564  1.555512
1  24.448276  6.008422  3.051724  6.386973  161.021674  96.473315  1.538471
```

|   |           |          |          |          |            |           |          |
|---|-----------|----------|----------|----------|------------|-----------|----------|
| 2 | 23.868852 | 5.974074 | 3.000000 | 6.138434 | 161.244045 | 94.127025 | 1.523105 |
| 3 | 23.868852 | 5.974074 | 3.032787 | 6.171220 | 161.244045 | 94.127025 | 1.523105 |
| 4 | 23.343750 | 5.942945 | 2.953125 | 5.913194 | 161.445569 | 92.000700 | 1.509180 |

|   | AATS0pe  | AATS0s   | AATS0se  | ... | A549_float | MCF-7_float | LoVo_float | \ |
|---|----------|----------|----------|-----|------------|-------------|------------|---|
| 0 | 6.126680 | 3.435416 | 7.629859 | ... | 10.8       | 10.3        | 6.5        |   |
| 1 | 6.088791 | 3.330998 | 7.596891 | ... | 11.6       | 12.0        | 8.5        |   |
| 2 | 6.054630 | 3.236850 | 7.567166 | ... | 10.9       | 12.2        | 8.8        |   |
| 3 | 6.054630 | 3.257798 | 7.567166 | ... | 10.5       | 11.3        | 8.5        |   |
| 4 | 6.023670 | 3.151529 | 7.540228 | ... | 89.5       | 92.7        | 52.8       |   |

|   | LoVo/DX_float | BALB/3T3_float | A549_float_transformed | \ |
|---|---------------|----------------|------------------------|---|
| 0 | 54.9          | 10.2           | 7.966576               |   |
| 1 | 31.1          | 14.3           | 7.935542               |   |
| 2 | 17.9          | 11.7           | 7.962574               |   |
| 3 | 10.2          | 11.0           | 7.978811               |   |
| 4 | 77.8          | 99.4           | 7.048177               |   |

|   | MCF-7_float_transformed | LoVo_float_transformed | LoVo/DX_float_transformed | \ |
|---|-------------------------|------------------------|---------------------------|---|
| 0 | 7.987163                | 8.187087               | 7.260428                  |   |
| 1 | 7.920819                | 8.070581               | 7.507240                  |   |
| 2 | 7.913640                | 8.055517               | 7.747147                  |   |
| 3 | 7.946922                | 8.070581               | 7.991400                  |   |
| 4 | 7.032920                | 7.277366               | 7.109020                  |   |

|   | BALB/3T3_float_transformed |
|---|----------------------------|
| 0 | 7.991400                   |
| 1 | 7.844664                   |
| 2 | 7.931814                   |
| 3 | 7.958607                   |
| 4 | 7.002614                   |

[5 rows x 1221 columns]

```
[4]: data = load_prepared_data[list(load_prepared_data.columns)[0:-10]]
data[target] = load_prepared_data[load_prepared_data.columns[-4]]
data.head()
```

|   | AATS0Z    | AATS0are | AATS0d   | AATS0dv  | AATS0i     | AATS0m    | AATS0p   | \ |
|---|-----------|----------|----------|----------|------------|-----------|----------|---|
| 0 | 25.090909 | 6.046518 | 3.109091 | 6.662626 | 160.775045 | 99.075564 | 1.555512 |   |
| 1 | 24.448276 | 6.008422 | 3.051724 | 6.386973 | 161.021674 | 96.473315 | 1.538471 |   |
| 2 | 23.868852 | 5.974074 | 3.000000 | 6.138434 | 161.244045 | 94.127025 | 1.523105 |   |
| 3 | 23.868852 | 5.974074 | 3.032787 | 6.171220 | 161.244045 | 94.127025 | 1.523105 |   |
| 4 | 23.343750 | 5.942945 | 2.953125 | 5.913194 | 161.445569 | 92.000700 | 1.509180 |   |

|   | AATS0pe  | AATS0s   | AATS0se  | ... | piPC10   | piPC2    | piPC3    | piPC4    | \ |
|---|----------|----------|----------|-----|----------|----------|----------|----------|---|
| 0 | 6.126680 | 3.435416 | 7.629859 | ... | 7.999655 | 4.266195 | 4.915408 | 5.516700 |   |

|   |          |          |          |     |          |          |          |          |
|---|----------|----------|----------|-----|----------|----------|----------|----------|
| 1 | 6.088791 | 3.330998 | 7.596891 | ... | 8.018726 | 4.280132 | 4.922714 | 5.520711 |
| 2 | 6.054630 | 3.236850 | 7.567166 | ... | 8.028799 | 4.293878 | 4.929967 | 5.524706 |
| 3 | 6.054630 | 3.257798 | 7.567166 | ... | 8.037440 | 4.307438 | 4.929967 | 5.524706 |
| 4 | 6.023670 | 3.151529 | 7.540228 | ... | 8.034892 | 4.307438 | 4.937168 | 5.528685 |

|   | piPC5    | piPC6    | piPC7    | piPC8    | piPC9    | MCF-7    |
|---|----------|----------|----------|----------|----------|----------|
| 0 | 6.098566 | 6.595759 | 6.979116 | 7.337313 | 7.681445 | 7.987163 |
| 1 | 6.103048 | 6.601209 | 6.985613 | 7.349442 | 7.695531 | 7.920819 |
| 2 | 6.105281 | 6.603923 | 6.989306 | 7.353932 | 7.704023 | 7.913640 |
| 3 | 6.107510 | 6.606629 | 6.992068 | 7.361425 | 7.709420 | 7.946922 |
| 4 | 6.107510 | 6.605277 | 6.991148 | 7.356489 | 7.707175 | 7.032920 |

[5 rows x 1212 columns]

## 2 Multiple Linear regression (MLR)

```
[5]: without_standardization, train_r2_, test_r2_, hist1, hist2, target_column_name,
      ↪ training_data_RMSE, test_data_RMSE = pred_model.
      ↪ prepare_data_and_create_model(molecular_descriptors_df=data,
      ↪
      ↪ correlation_threshold=0.5,
      ↪
      ↪ standardization=False,
      ↪
      ↪ model_type='linear_model',
      ↪
      ↪ target_column_name = str(target),
      ↪
      ↪ random_state=random_state,
      ↪
      ↪ train_test_split_=True,
      ↪
      ↪ verbose=True)
```

I am not doing standardization...

|   | molecular descriptor name |            |
|---|---------------------------|------------|
| 0 | AATS0Z                    |            |
| 1 | AATS0are                  |            |
| 2 | AATS0d                    |            |
| 3 | AATS0dv                   |            |
| 4 | AATS0i                    |            |
|   | molecular descriptor name | corr_value |
| 0 | AATS0Z                    | -0.038502  |
| 1 | AATS0are                  | -0.120847  |
| 2 | AATS0d                    | 0.041648   |
| 3 | AATS0dv                   | -0.115899  |

|      |                           |            |                            |
|------|---------------------------|------------|----------------------------|
| 4    | AATSOi                    | 0.191765   |                            |
|      | molecular descriptor name | corr_value | absolute correlation value |
| 0    | AATSOZ                    | -0.038502  | 0.038502                   |
| 1    | AATSOare                  | -0.120847  | 0.120847                   |
| 2    | AATSOd                    | 0.041648   | 0.041648                   |
| 3    | AATSOdv                   | -0.115899  | 0.115899                   |
| 4    | AATSOi                    | 0.191765   | 0.191765                   |
|      | molecular descriptor name | corr_value | absolute correlation value |
| 226  | AMID_0                    | -0.520578  | 0.520578                   |
| 505  | EState_VSA5               | -0.578904  | 0.578904                   |
| 506  | EState_VSA6               | 0.519794   | 0.519794                   |
| 791  | MDEO-12                   | -0.525441  | 0.525441                   |
| 1211 | MCF-7                     | 1.000000   | 1.000000                   |
|      | molecular descriptor name | corr_value | absolute correlation value |
| 226  | AMID_0                    | -0.520578  | 0.520578                   |
| 505  | EState_VSA5               | -0.578904  | 0.578904                   |
| 506  | EState_VSA6               | 0.519794   | 0.519794                   |
| 791  | MDEO-12                   | -0.525441  | 0.525441                   |

The model used is: LinearReg..

Return the coefficient of determination of the prediction:  
0.5009760847434094

R<sup>2</sup> score: 0.5283510681142922

Correlation coefficient: 0.7268776156371114

Test data - unseen during training:  
R<sup>2</sup> score: 0.5009760847434094

Correlation coefficient: 0.707796640811052

[8.00252575 6.60183757 7.65912481 6.88611169 7.8702033 7.23304372  
7.57064419 8.42411387 7.0697769 7.89024083 7.95174669 8.38076499  
7.96632403 7.61854434 7.3479345 6.45607766 7.72287088 6.79263447]

113 8.022276  
35 6.066513  
101 6.920819  
36 6.108463  
100 7.376751  
13 7.987163  
0 7.987163  
114 7.823909  
104 8.397940  
96 7.920819  
40 8.091515  
103 8.376751  
48 7.886057  
39 8.455932  
14 8.086186  
117 5.920819  
21 8.113509  
9 6.143150

Name: MCF-7, dtype: float64

Training Root Mean Square Error: 0.6654395471577522

Testing Root Mean Square Error: 0.6092268213393355

```
[6]: print(target_column_name+str('_transformed'))  
     print(hist1[target_column_name].hist())
```

MCF-7\_transformed

AxesSubplot(0.125,0.11;0.775x0.77)



```
[7]: with_standardization, train_r2_, test_r2_, hist1, hist2, target_column_name,   
      ↪ training_data_RMSE, test_data_RMSE = pred_model.  
      ↪ prepare_data_and_create_model(molecular_descriptors_df=data,  
  
      ↪           correlation_threshold=0.50,  
  
      ↪           standardization=True,  
  
      ↪           model_type='linear_model',  
  
      ↪           target_column_name = target,  
  
      ↪           random_state=random_state,
```

```

↪          train_test_split_=True,
↪          verbose=True)

```

I am doing standardization...

```

molecular descriptor name
0          AATSOZ
1          AATSOare
2          AATSOd
3          AATSOdv
4          AATSOi
molecular descriptor name  corr_value
0          AATSOZ      -0.038502
1          AATSOare    -0.120847
2          AATSOd      0.041648
3          AATSOdv     -0.115899
4          AATSOi      0.191765
molecular descriptor name  corr_value  absolute correlation value
0          AATSOZ      -0.038502          0.038502
1          AATSOare    -0.120847          0.120847
2          AATSOd      0.041648          0.041648
3          AATSOdv     -0.115899          0.115899
4          AATSOi      0.191765          0.191765
molecular descriptor name  corr_value  absolute correlation value
226          AMID_0      -0.520578          0.520578
505          EState_VSA5 -0.578904          0.578904
506          EState_VSA6 0.519794          0.519794
791          MDEO-12     -0.525441          0.525441
1211         MCF-7       1.000000          1.000000
molecular descriptor name  corr_value  absolute correlation value
226          AMID_0      -0.520578          0.520578
505          EState_VSA5 -0.578904          0.578904
506          EState_VSA6 0.519794          0.519794
791          MDEO-12     -0.525441          0.525441
The model used is: LinearReg..
Return the coefficient of determination of the prediction:
0.5009760847434094
R^2 score: 0.5283510681142922
Correlation coefficient: 0.7268776156371114
Test data - unseen during training:
R^2 score: 0.5009760847434094
Correlation coefficient: 0.707796640811052
[8.00252575 6.60183757 7.65912481 6.88611169 7.8702033 7.23304372
 7.57064419 8.42411387 7.0697769 7.89024083 7.95174669 8.38076499
 7.96632403 7.61854434 7.3479345 6.45607766 7.72287088 6.79263447]
113      8.022276
35       6.066513

```



```

101    6.920819
36    6.108463
100    7.376751
13    7.987163
0    7.987163
114    7.823909
104    8.397940
96    7.920819
40    8.091515
103    8.376751
48    7.886057
39    8.455932
14    8.086186
117    5.920819
21    8.113509
9    6.143150

```

Name: MCF-7, dtype: float64

Training Root Mean Square Error: 0.6654395471577522

Testing Root Mean Square Error: 0.6092268213393355

## 2.1 Search inside correlation space

```

[8]: step = 0.01
initial_step = corr_low
last_step = corr_high
first_list = [x / 100.0 for x in range(int(initial_step*100),
    ↪int(last_step*100), int(step*100))]
second_list = []
third_list = []
fourth_l = []
fifth_l = []
f_list = []
for i in first_list:
    without_standardization, train_r2, test_r2, _, h_, target_column_name,
    ↪training_data_RMSE, test_data_RMSE = pred_model.
    ↪prepare_data_and_create_model(molecular_descriptors_df = data,

    ↪                                correlation_threshold = i,

    ↪                                standardization = False,

    ↪                                model_type = 'linear_model',

    ↪                                target_column_name = target,

    ↪                                random_state=random_state,

```

```

    train_test_split_ = True,

    verbose = False)
second_list.append(train_r2)
third_list.append(test_r2)
fourth_l.append(training_data_RMSE)
fifth_l.append(test_data_RMSE)
f_list.append(len(h_))

```

```

[9]: df_without_standardization = pd.DataFrame(data=first_list,
    columns=["Correlation threshold"])
df_without_standardization['Training data R^2 score'] = second_list
df_without_standardization['Test data R^2 score'] = third_list
df_without_standardization['Training RMSE'] = fourth_l
df_without_standardization['Test RMSE'] = fifth_l
df_without_standardization['Number of features'] = f_list

```

```

[10]: df_linear = df_without_standardization.copy()
df_without_standardization

```

```

[10]:
Correlation threshold  Training data R^2 score  Test data R^2 score \
0                    0.33                0.983044          -9.346829
1                    0.34                0.963409           -2.228715
2                    0.35                0.919079           -0.202498
3                    0.36                0.893639           -0.095634
4                    0.37                0.843982           -0.466498
5                    0.38                0.817407            0.055234
6                    0.39                0.758880           -0.112670
7                    0.40                0.739958           -0.378030
8                    0.41                0.732273           -0.000031
9                    0.42                0.695477            0.127398
10                   0.43                0.629188            0.081366
11                   0.44                0.626877            0.080512
12                   0.45                0.621663            0.102429
13                   0.46                0.593073            0.174540
14                   0.47                0.592212            0.153668
15                   0.48                0.548178            0.553011
16                   0.49                0.540995            0.556265
17                   0.50                0.528351            0.500976
18                   0.51                0.528351            0.500976

Training RMSE  Test RMSE  Number of features
0          0.126172    2.774099              84
1          0.185349    1.549648              74
2          0.275632    0.945715              61
3          0.316002    0.902716              50

```

|    |          |          |    |
|----|----------|----------|----|
| 4  | 0.382724 | 1.044381 | 43 |
| 5  | 0.414038 | 0.838263 | 37 |
| 6  | 0.475791 | 0.909707 | 29 |
| 7  | 0.494107 | 1.012390 | 26 |
| 8  | 0.501355 | 0.862432 | 25 |
| 9  | 0.534698 | 0.805613 | 19 |
| 10 | 0.590032 | 0.826589 | 14 |
| 11 | 0.591868 | 0.826973 | 13 |
| 12 | 0.595990 | 0.817058 | 11 |
| 13 | 0.618098 | 0.783549 | 10 |
| 14 | 0.618752 | 0.793394 | 9  |
| 15 | 0.651302 | 0.576590 | 8  |
| 16 | 0.656459 | 0.574487 | 6  |
| 17 | 0.665440 | 0.609227 | 4  |
| 18 | 0.665440 | 0.609227 | 4  |

```
[ ]:
```

## 2.2 Plots

```
[11]: plt.plot(df_without_standardization['Correlation threshold'],
↳df_without_standardization['Training data R^2 score'], label = "Training_
↳data R^2 score", marker='v')
plt.plot(df_without_standardization['Correlation threshold'],
↳df_without_standardization['Test data R^2 score'], label = "Test data R^2_
↳score", marker='D')
plt.legend()
plt.xlabel('Correlation threshold')
plt.ylabel('R^2 score')
plt.ylim([0, 1])
plt.show()
```

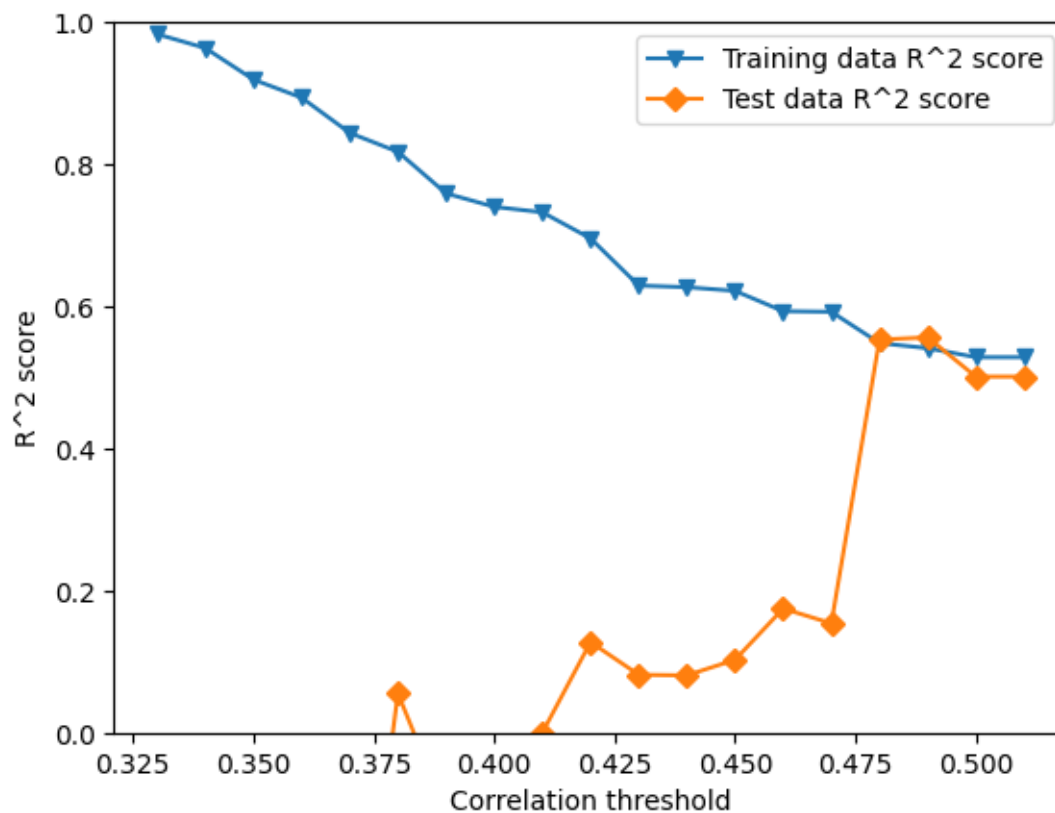

```
[12]: plt.plot(df_without_standardization['Correlation threshold'],
             df_without_standardization['Number of features'], label = "Number of
             features", marker='.')
plt.legend()
plt.xlabel('Correlation threshold')
plt.ylabel('Number of features')
plt.show()
```



[ ]:

## 2.3 Decision Tree

```
[13]: without_standardization, train_r2_, test_r2_, hist1, hist2, target_column_name,
      ↪ training_data_RMSE, test_data_RMSE = pred_model.
      ↪ prepare_data_and_create_model(molecular_descriptors_df=data,
      ↪
      ↪ correlation_threshold=0.50,
      ↪
      ↪ standardization=False,
      ↪
      ↪ model_type='DecisionTreeRegressor',
      ↪
      ↪ max_depth=5,
      ↪
      ↪ target_column_name = target,
      ↪
      ↪ random_state=random_state,
```

```

↪          train_test_split_=True,
↪          verbose=True)

```

I am not doing standardization...

```

molecular descriptor name
0          AATSOZ
1          AATSOare
2          AATSOd
3          AATSOdv
4          AATSOi
molecular descriptor name  corr_value
0          AATSOZ      -0.038502
1          AATSOare    -0.120847
2          AATSOd       0.041648
3          AATSOdv     -0.115899
4          AATSOi       0.191765
molecular descriptor name  corr_value  absolute correlation value
0          AATSOZ      -0.038502          0.038502
1          AATSOare    -0.120847          0.120847
2          AATSOd       0.041648          0.041648
3          AATSOdv     -0.115899          0.115899
4          AATSOi       0.191765          0.191765
molecular descriptor name  corr_value  absolute correlation value
226          AMID_0      -0.520578          0.520578
505          EState_VSA5 -0.578904          0.578904
506          EState_VSA6  0.519794          0.519794
791          MDEO-12     -0.525441          0.525441
1211         MCF-7       1.000000          1.000000
molecular descriptor name  corr_value  absolute correlation value
226          AMID_0      -0.520578          0.520578
505          EState_VSA5 -0.578904          0.578904
506          EState_VSA6  0.519794          0.519794
791          MDEO-12     -0.525441          0.525441
The model used is: DecisionTree...
Return the coefficient of determination of the prediction:
-0.005104855722772195
R^2 score: 0.8657226333752897
Correlation coefficient: 0.9304421708925761
Test data - unseen during training:
R^2 score: -0.005104855722772195
Correlation coefficient: nan
[7.94564921 7.67778071 8.35232643 7.67778071 7.94564921 8.95860731
 7.94564921 7.69458125 7.20277093 7.94564921 7.94564921 7.94564921
 7.94564921 7.94564921 8.95860731 6.02227639 6.99012437 7.20277093]
113      8.022276
35       6.066513

```

```

101    6.920819
36     6.108463
100    7.376751
13     7.987163
0      7.987163
114    7.823909
104    8.397940
96     7.920819
40     8.091515
103    8.376751
48     7.886057
39     8.455932
14     8.086186
117    5.920819
21     8.113509
9      6.143150

```

Name: MCF-7, dtype: float64

Training Root Mean Square Error: 0.35505905070999344

Testing Root Mean Square Error: 0.8646174988464919

```

[14]: print(target_column_name+str('_transformed'))
      print(hist1[target_column_name].hist())

```

MCF-7\_transformed

AxesSubplot(0.125,0.11;0.775x0.77)

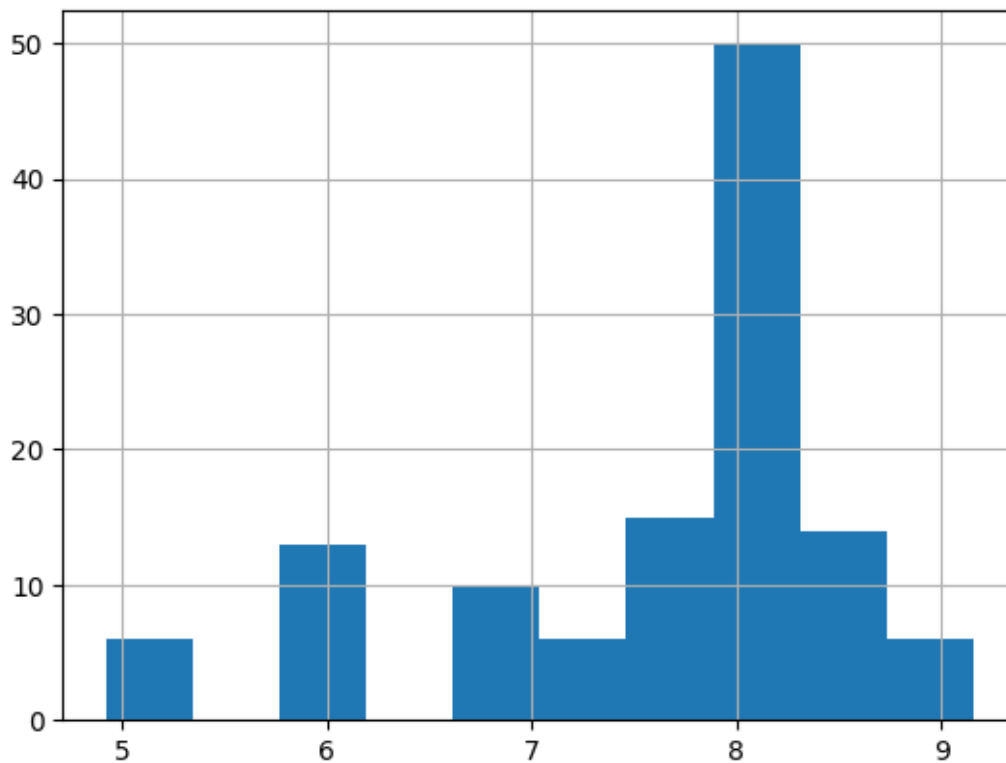

```
[15]: with_standardization, train_r2_, test_r2_, hist1, hist2, target_column_name,
      ↪ training_data_RMSE, test_data_RMSE = pred_model.
      ↪ prepare_data_and_create_model(molecular_descriptors_df=data,
      ↪
      ↪         correlation_threshold=0.50,
      ↪
      ↪         standardization=True,
      ↪
      ↪         model_type='DecisionTreeRegressor',
      ↪
      ↪         max_depth=5,
      ↪
      ↪         target_column_name = target,
      ↪
      ↪         random_state=random_state,
      ↪
      ↪         train_test_split_=True,
      ↪
      ↪         verbose=True)
```

I am doing standardization...

|   | molecular descriptor name |  |
|---|---------------------------|--|
| 0 | AATSOZ                    |  |
| 1 | AATSOare                  |  |
| 2 | AATSOd                    |  |
| 3 | AATSOdv                   |  |
| 4 | AATSOi                    |  |

  

|   | molecular descriptor name | corr_value |
|---|---------------------------|------------|
| 0 | AATSOZ                    | -0.038502  |
| 1 | AATSOare                  | -0.120847  |
| 2 | AATSOd                    | 0.041648   |
| 3 | AATSOdv                   | -0.115899  |
| 4 | AATSOi                    | 0.191765   |

  

|   | molecular descriptor name | corr_value | absolute correlation value |
|---|---------------------------|------------|----------------------------|
| 0 | AATSOZ                    | -0.038502  | 0.038502                   |
| 1 | AATSOare                  | -0.120847  | 0.120847                   |
| 2 | AATSOd                    | 0.041648   | 0.041648                   |
| 3 | AATSOdv                   | -0.115899  | 0.115899                   |
| 4 | AATSOi                    | 0.191765   | 0.191765                   |

  

|     | molecular descriptor name | corr_value | absolute correlation value |
|-----|---------------------------|------------|----------------------------|
| 226 | AMID_0                    | -0.520578  | 0.520578                   |
| 505 | EState_VSA5               | -0.578904  | 0.578904                   |
| 506 | EState_VSA6               | 0.519794   | 0.519794                   |
| 791 | MDE0-12                   | -0.525441  | 0.525441                   |



|      |                           |            |                            |
|------|---------------------------|------------|----------------------------|
| 1211 | MCF-7                     | 1.000000   | 1.000000                   |
|      | molecular descriptor name | corr_value | absolute correlation value |
| 226  | AMID_0                    | -0.520578  | 0.520578                   |
| 505  | EState_VSA5               | -0.578904  | 0.578904                   |
| 506  | EState_VSA6               | 0.519794   | 0.519794                   |
| 791  | MDE0-12                   | -0.525441  | 0.525441                   |

The model used is: DecisionTree...

Return the coefficient of determination of the prediction:

-0.005104855722772195

R<sup>2</sup> score: 0.8657226333752897

Correlation coefficient: 0.9304421708925761

Test data - unseen during training:

R<sup>2</sup> score: -0.005104855722772195

Correlation coefficient: nan

[7.94564921 7.67778071 8.35232643 7.67778071 7.94564921 8.95860731  
 7.94564921 7.69458125 7.20277093 7.94564921 7.94564921 7.94564921  
 7.94564921 7.94564921 8.95860731 6.02227639 6.99012437 7.20277093]

113 8.022276

35 6.066513

101 6.920819

36 6.108463

100 7.376751

13 7.987163

0 7.987163

114 7.823909

104 8.397940

96 7.920819

40 8.091515

103 8.376751

48 7.886057

39 8.455932

14 8.086186

117 5.920819

21 8.113509

9 6.143150

Name: MCF-7, dtype: float64

Training Root Mean Square Error: 0.35505905070999344

Testing Root Mean Square Error: 0.8646174988464919

## 2.4 Search inside correlation space

```
[16]: step = 0.01
      initial_step = corr_low
      last_step = corr_high
      first_list = [x / 100.0 for x in range(int(initial_step*100),
      ↪int(last_step*100), int(step*100))]
      max_depth = [range(2, 30, 1)]
```

```

corr_th = []
second_list = []
third_list = []
fourth_l = []
fifth_l = []
f_list = []
fif_list = []
for i in first_list:
    for depth in max_depth[0]:

        without_standardization, train_r2, test_r2, _, h_, target_column_name,
        ↪training_data_RMSE, test_data_RMSE = pred_model.
        ↪prepare_data_and_create_model(molecular_descriptors_df=data,

        ↪
            correlation_threshold=i,
        ↪
            standardization=False,
        ↪
            model_type='DecisionTreeRegressor',
        ↪
            max_depth=depth,
        ↪
            target_column_name = target,
        ↪
            random_state=random_state,
        ↪
            train_test_split_=True,
        ↪
            verbose=False)
        corr_th.append(i)
        second_list.append(train_r2)
        third_list.append(test_r2)
        fourth_l.append(training_data_RMSE)
        fifth_l.append(test_data_RMSE)
        f_list.append(len(h_))
        fif_list.append(depth)

```

```

[17]: df_without_standardization = pd.DataFrame(data=corr_th, columns=["Correlation_
        ↪threshold"])
df_without_standardization['Training data R^2 score'] = second_list
df_without_standardization['Test data R^2 score'] = third_list
df_without_standardization['Training RMSE'] = fourth_l
df_without_standardization['Test RMSE'] = fifth_l
df_without_standardization['Number of features'] = f_list
df_without_standardization['Depth number'] = fif_list

```

```
[18]: df_decision_tree = df_without_standardization.copy()
      #df_without_standardization.to_excel('../Data/
      ↪A549_Decision_tree_rs_'+str(random_state)+'.xlsx')
```

## 2.5 Plots

```
[19]: corre_list = [x / 100.0 for x in range(int(initial_step*100),
      ↪int(last_step*100), int(0.01*100))]
      for element in corre_list:
          element_ =
          ↪df_without_standardization[df_without_standardization['Correlation_
          ↪threshold'] == float(element)]
          plt.plot(element_['Depth number'], element_['Training data R^2 score'],
          ↪label = "Training data R^2 score", marker='v')
          plt.plot(element_['Depth number'], element_['Test data R^2 score'], label =
          ↪"Test data R^2 score", marker='D')
          plt.legend()
          plt.xlabel('Depth number -> correlation threshold: '+str(element)+' \n
          ↪Number of features: '+str(element_['Number of features'].iloc[0]),
          ↪fontweight='bold')
          plt.xlim(max(element_['Depth number'])+1, min(element_['Depth number'])-1)
          plt.ylabel('R^2 score')
          plt.ylim([0, 1])
          plt.rc('grid', linestyle="-. ", color='black')
          plt.grid(True)
          plt.show()
```

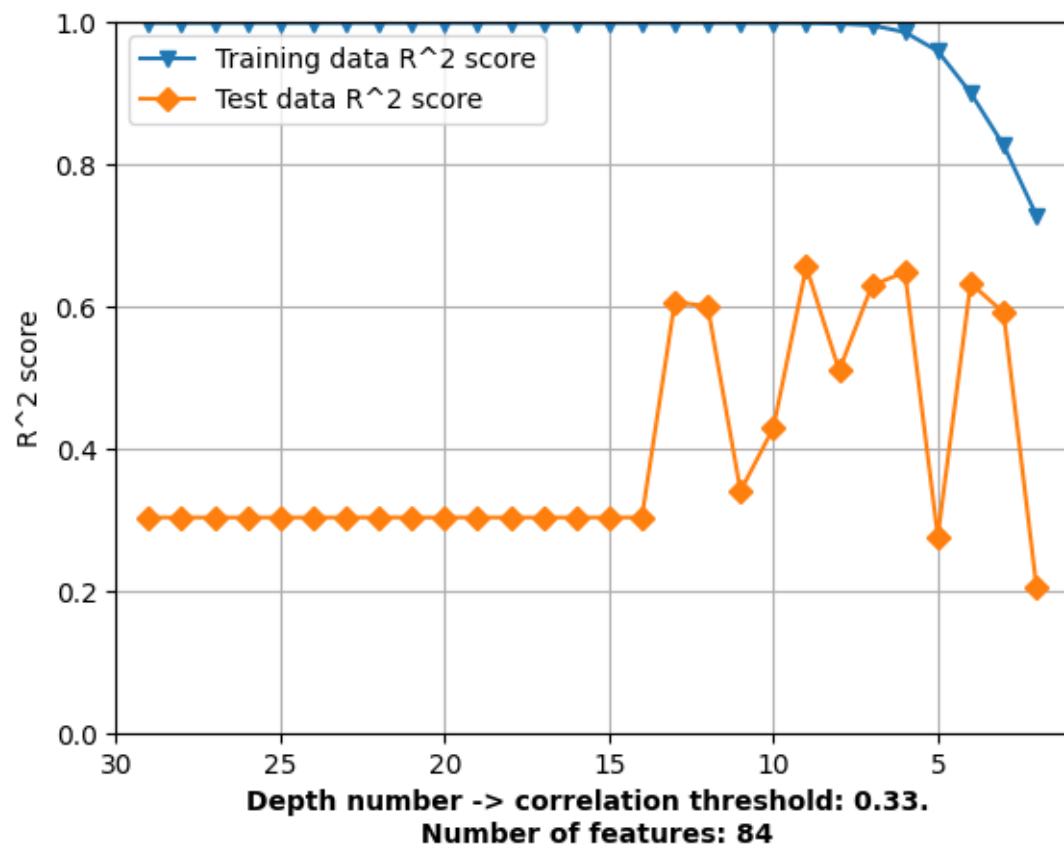

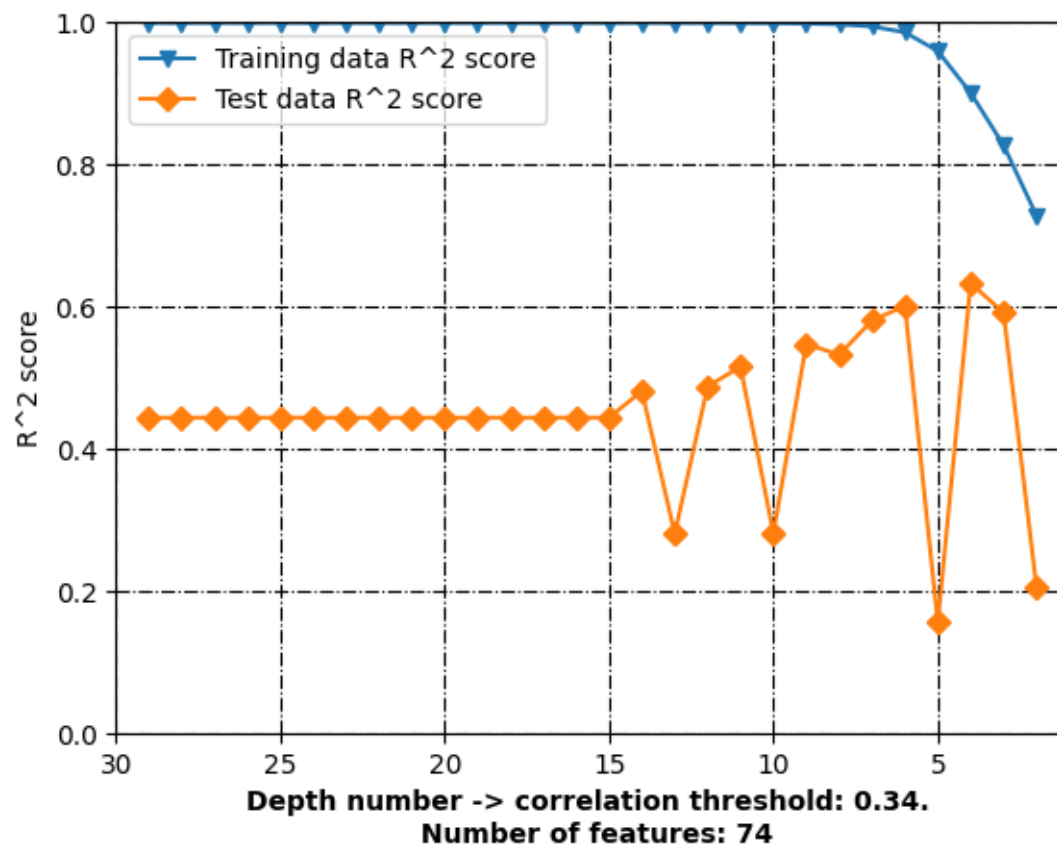

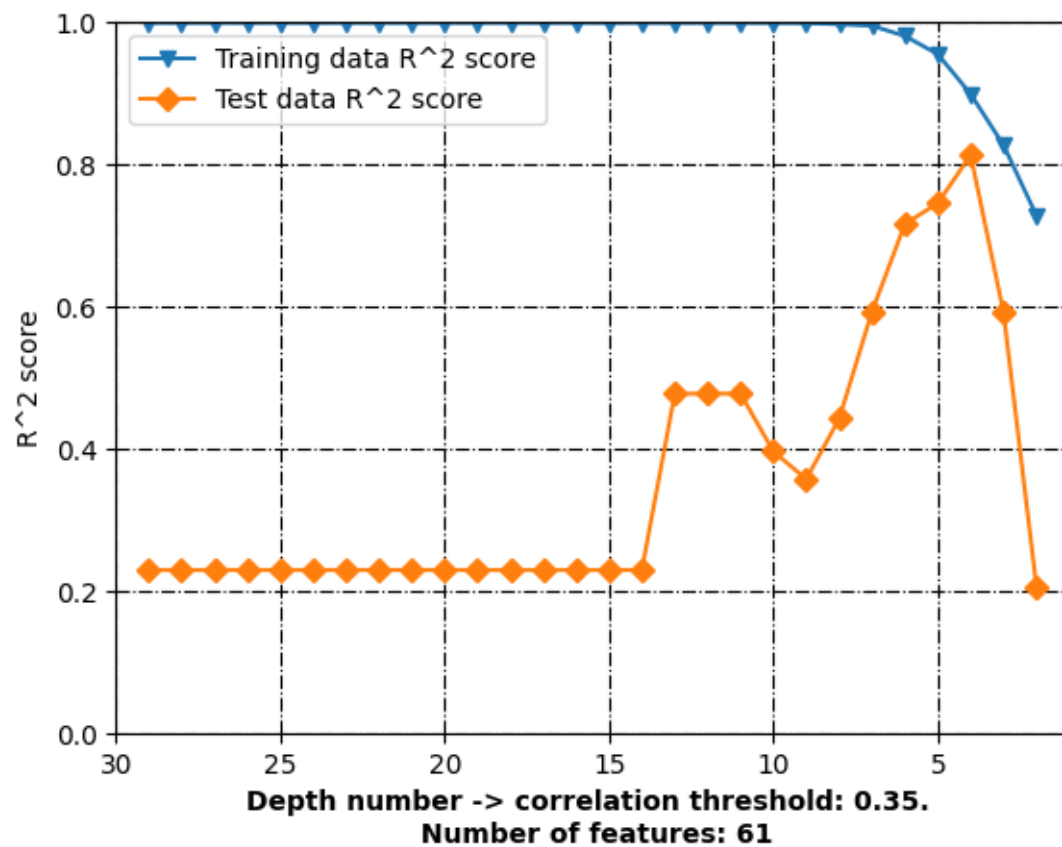

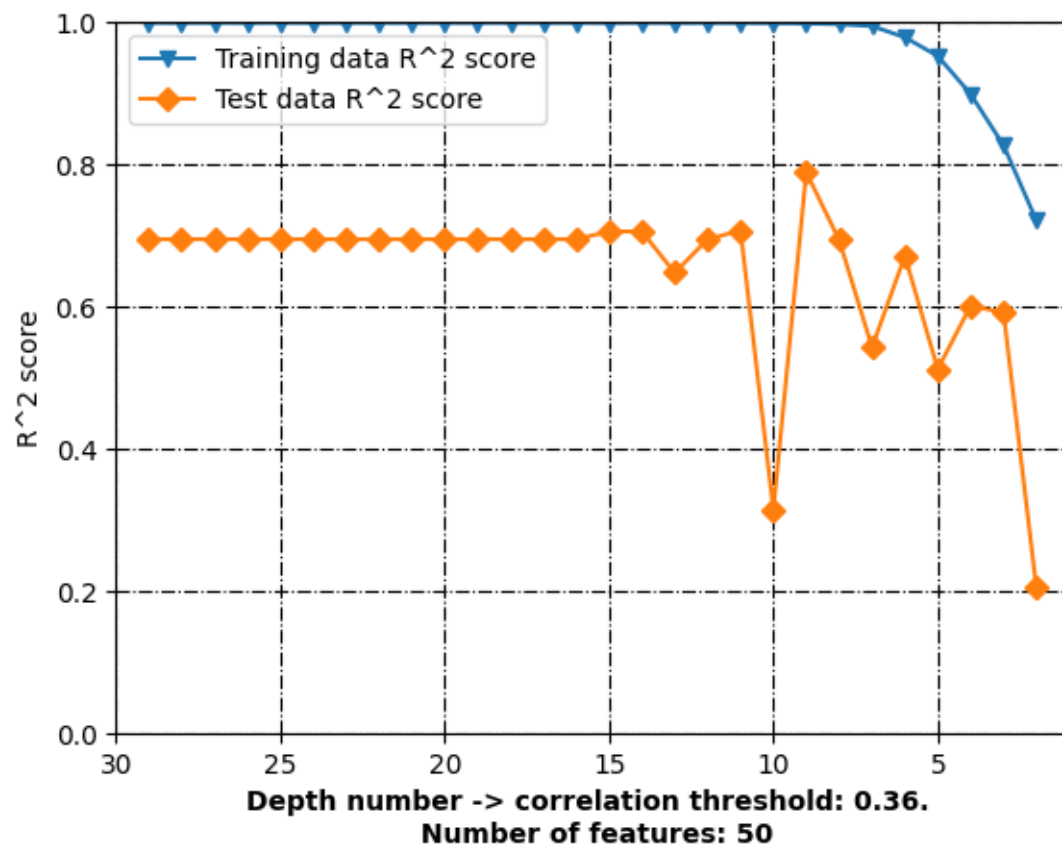

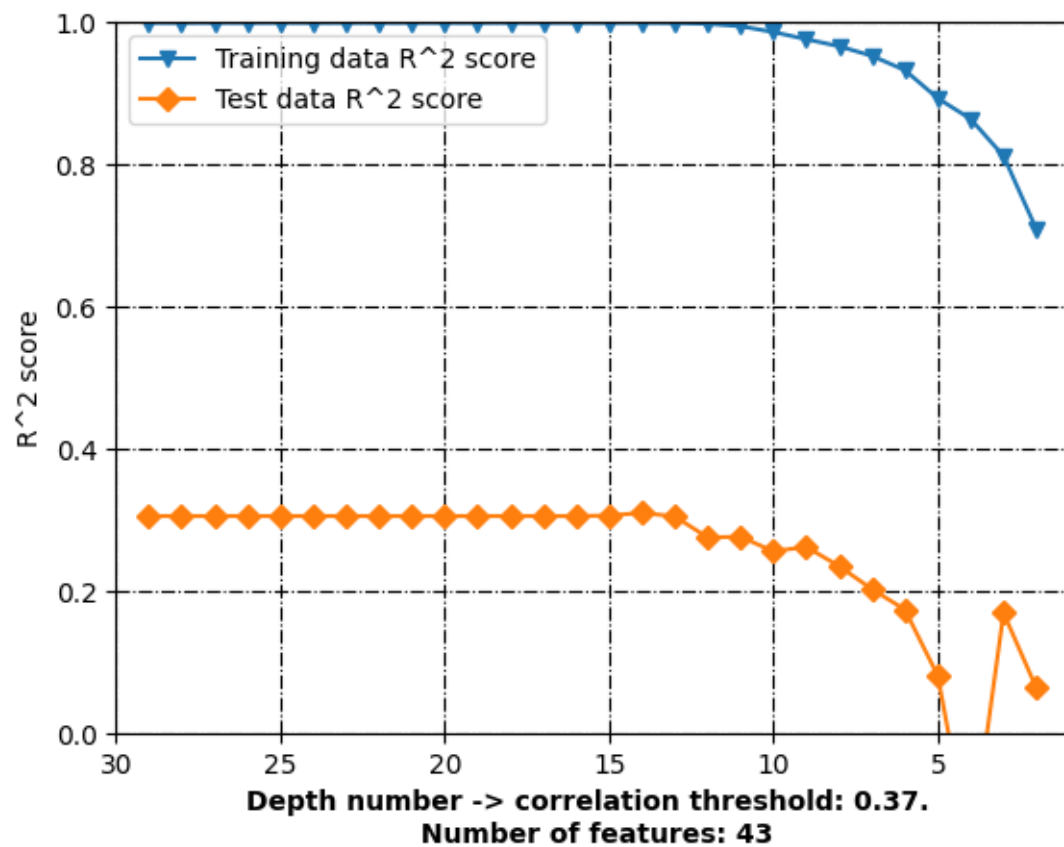



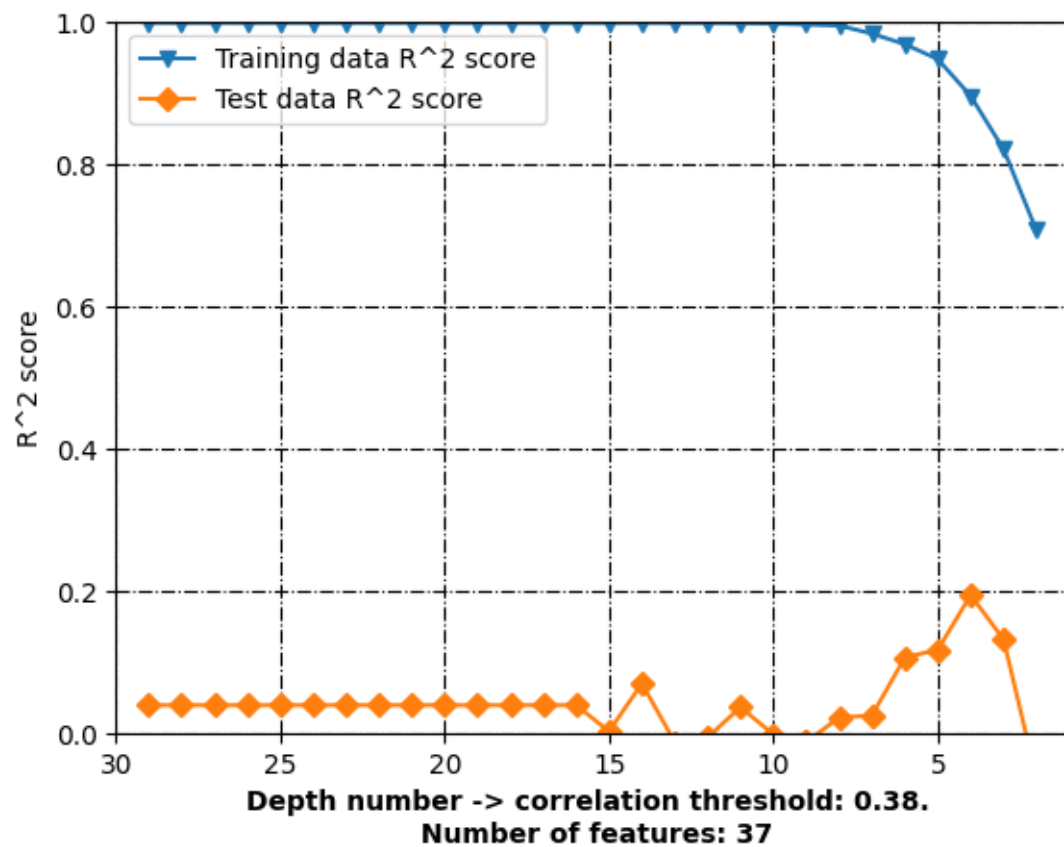

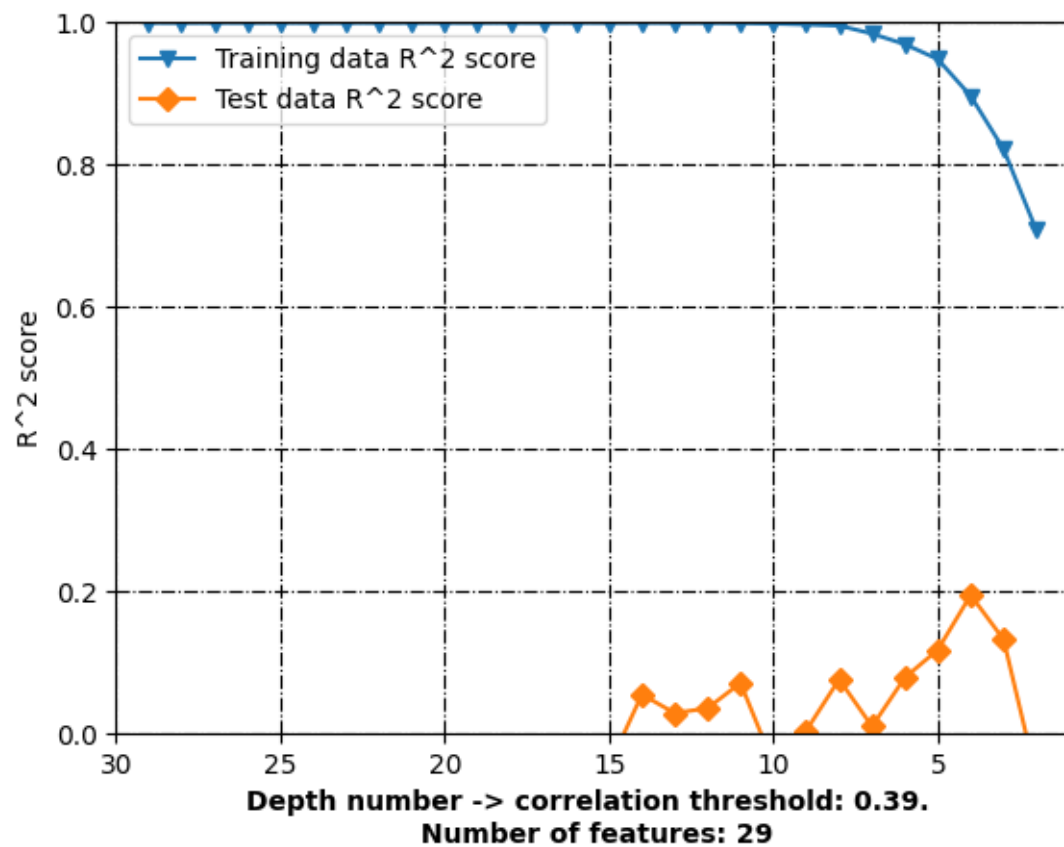

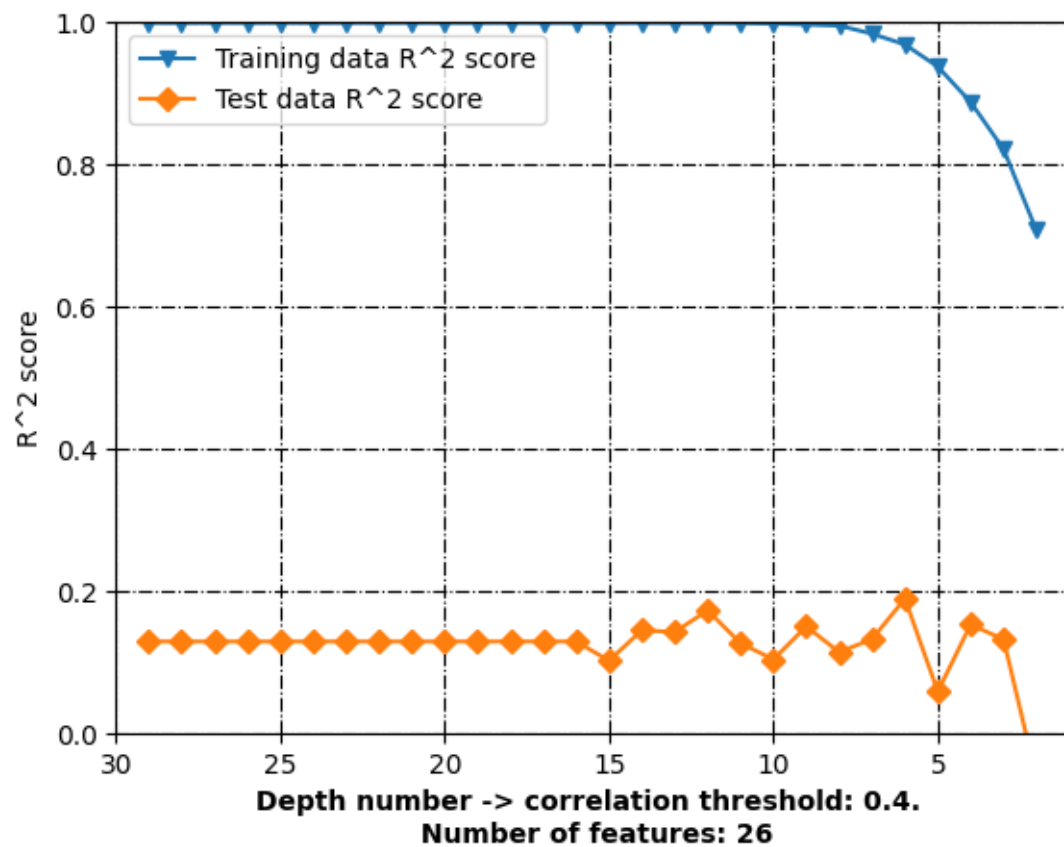

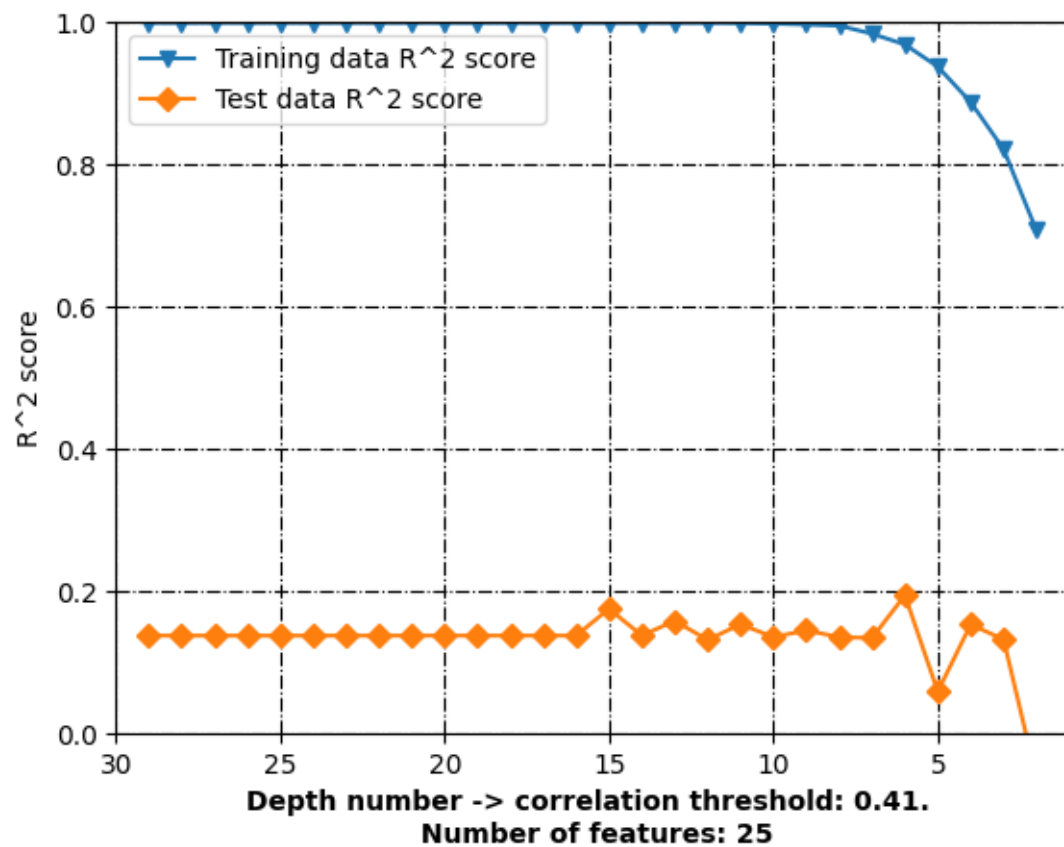

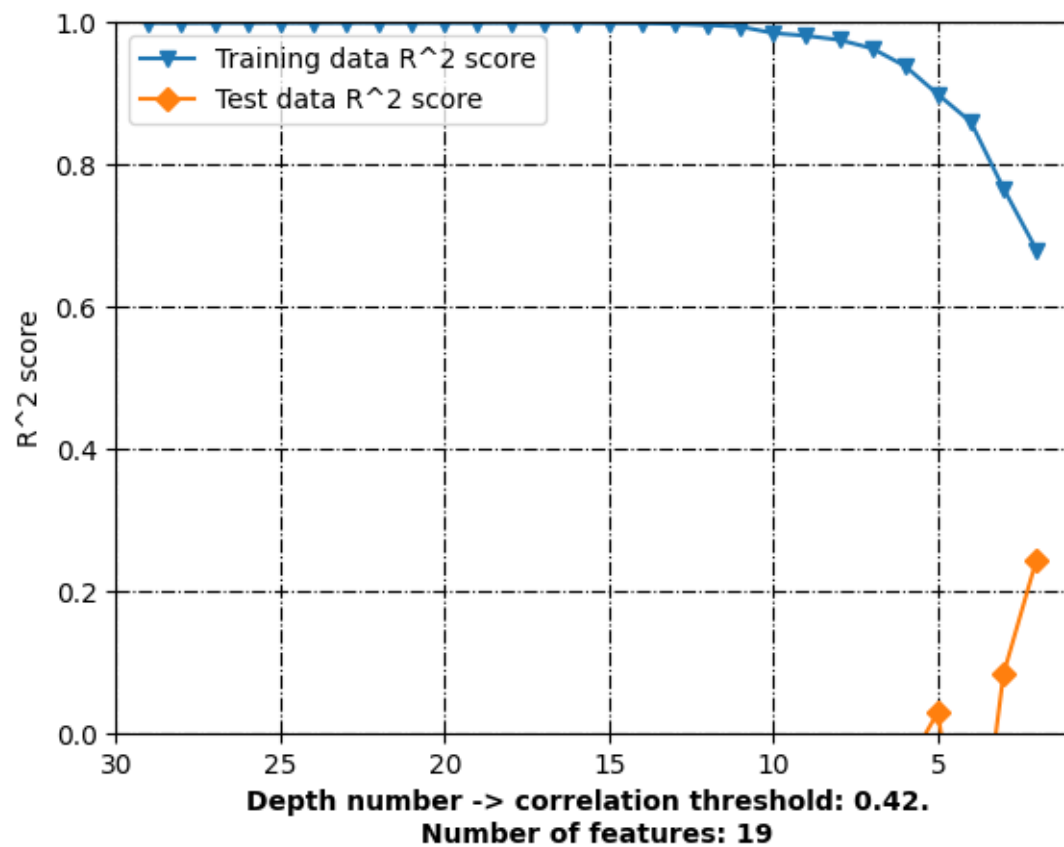

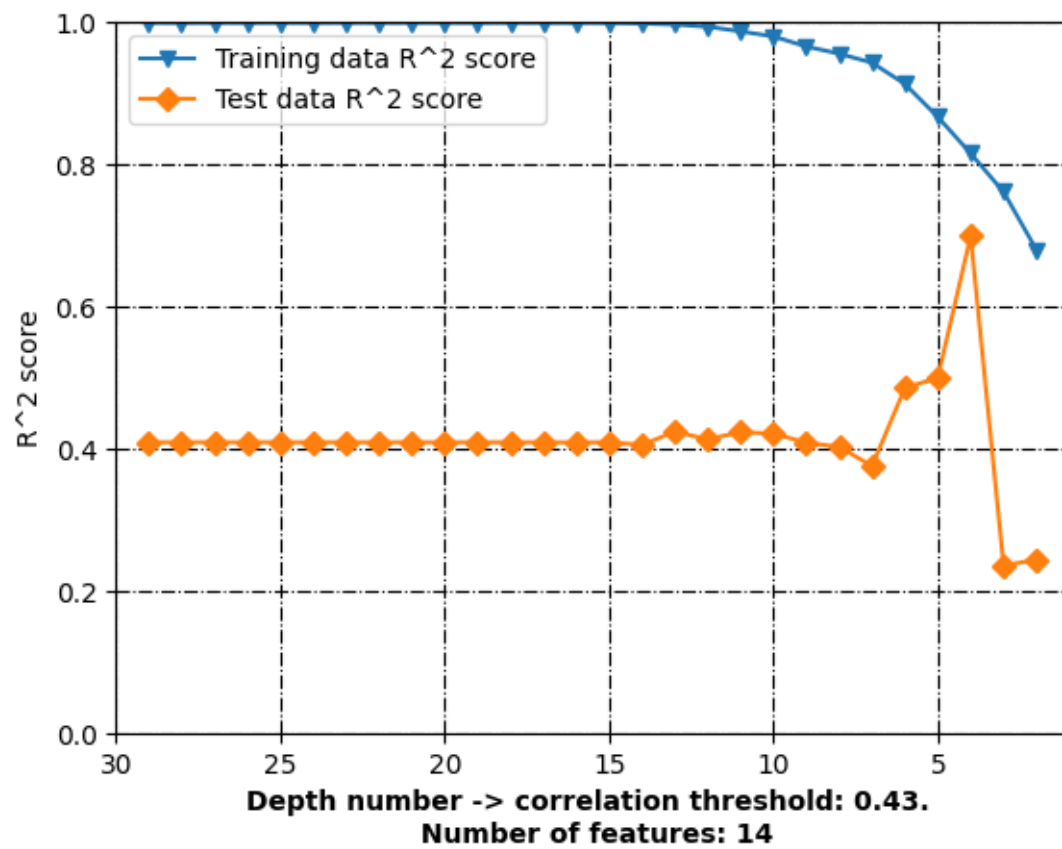

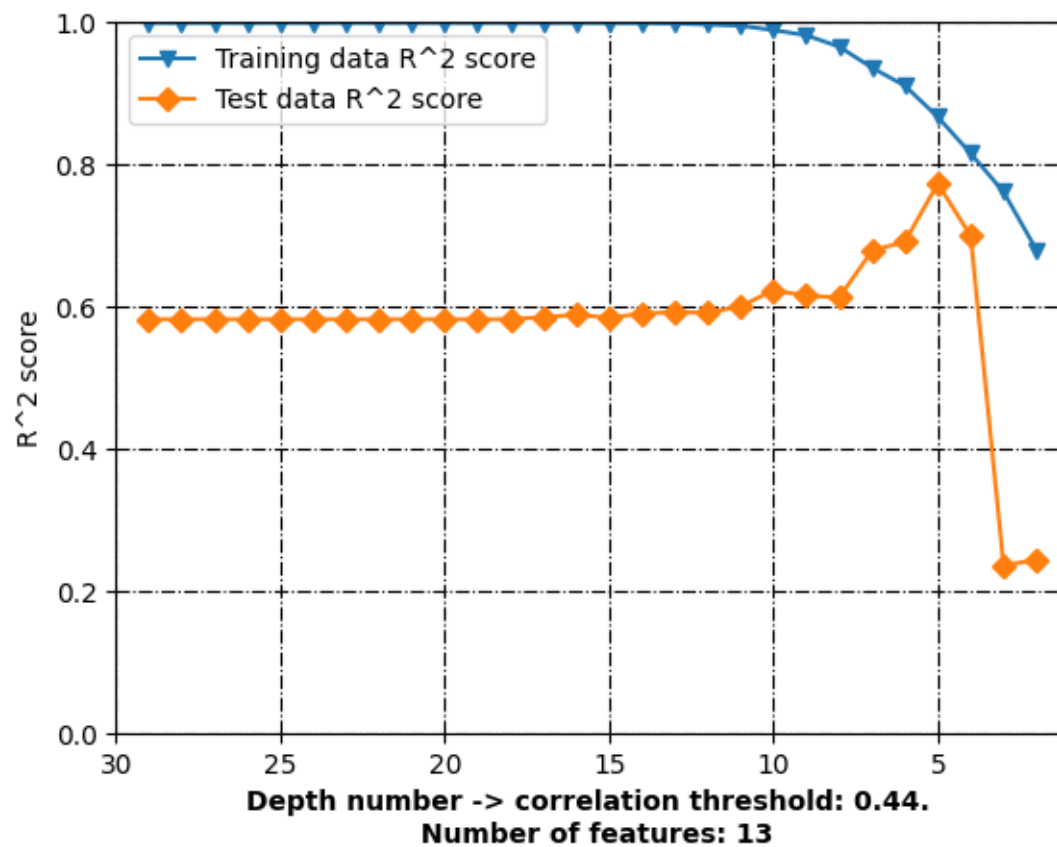

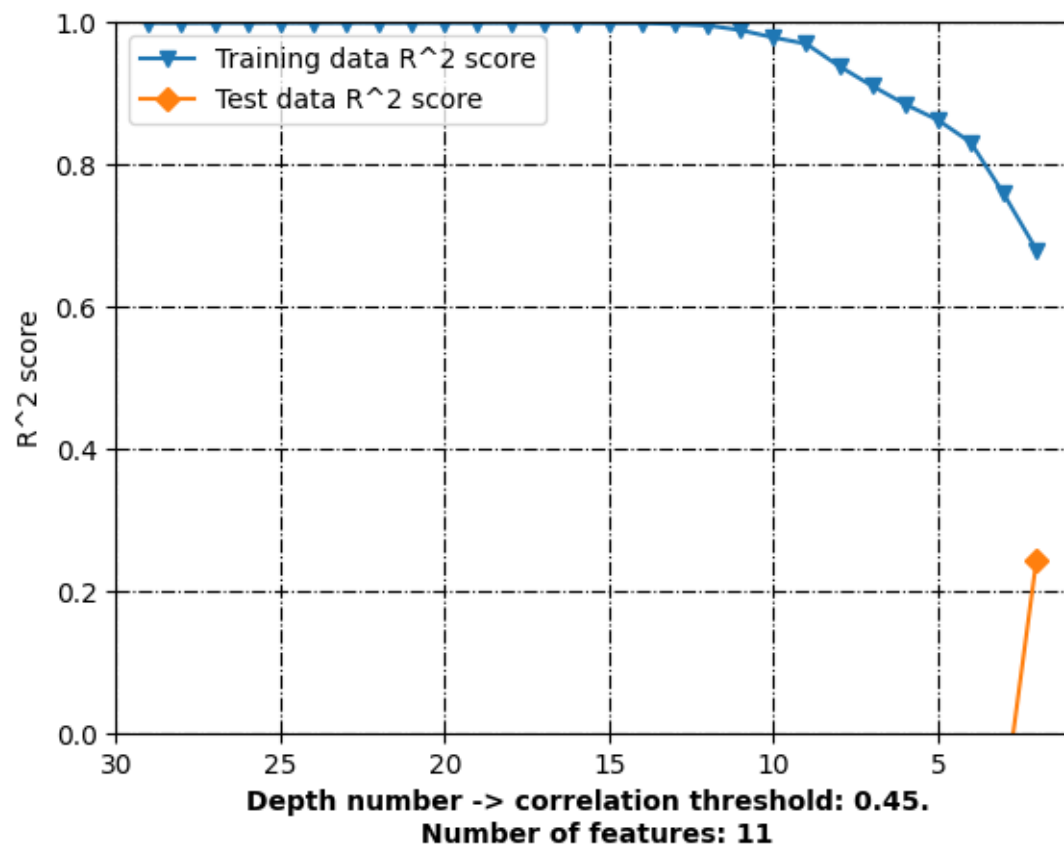



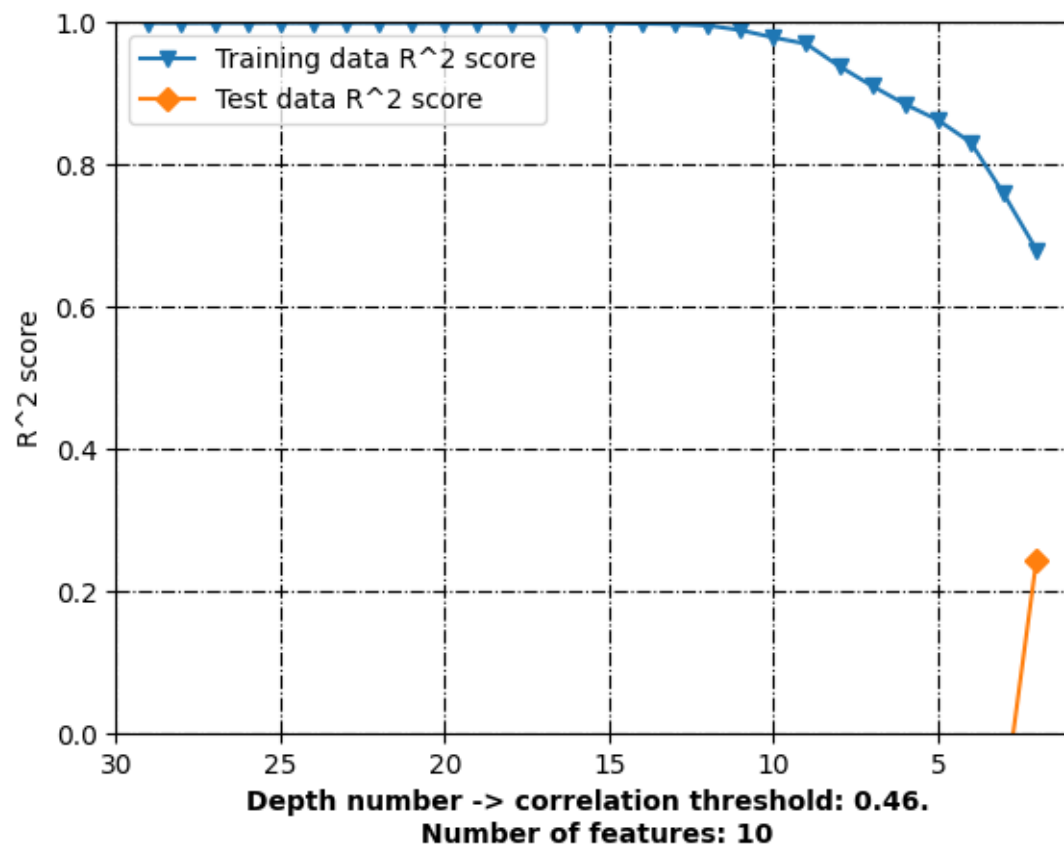

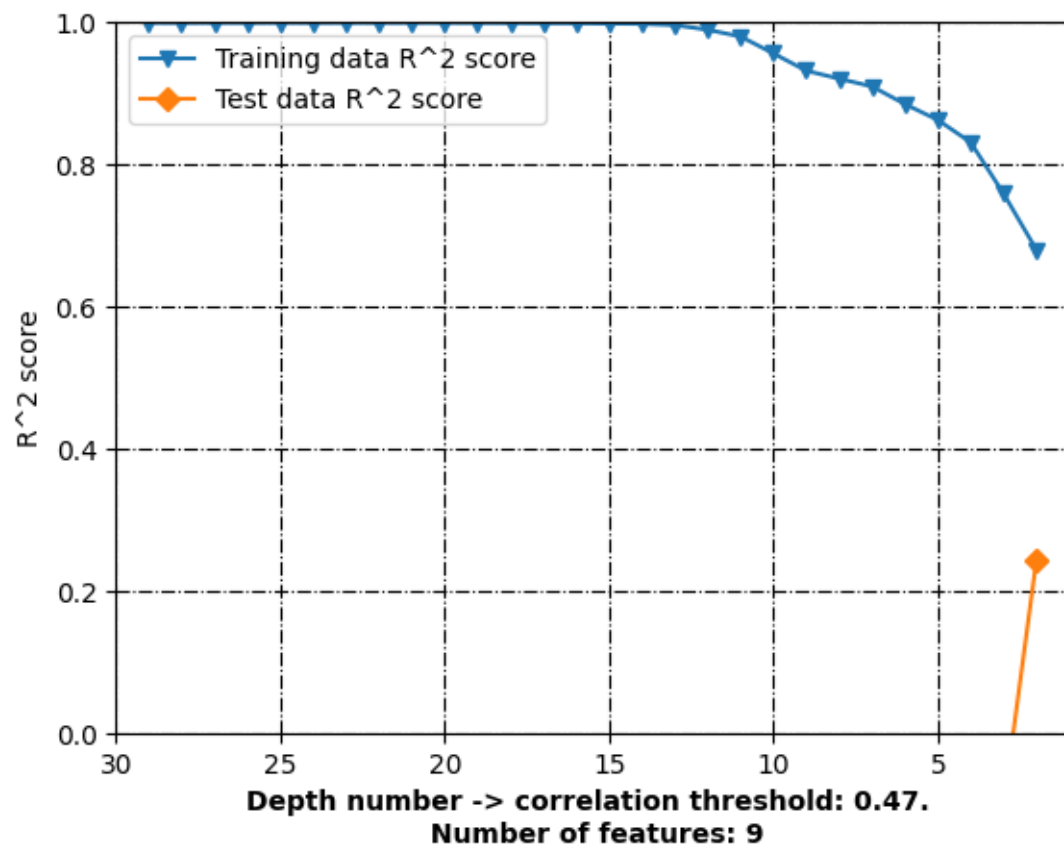

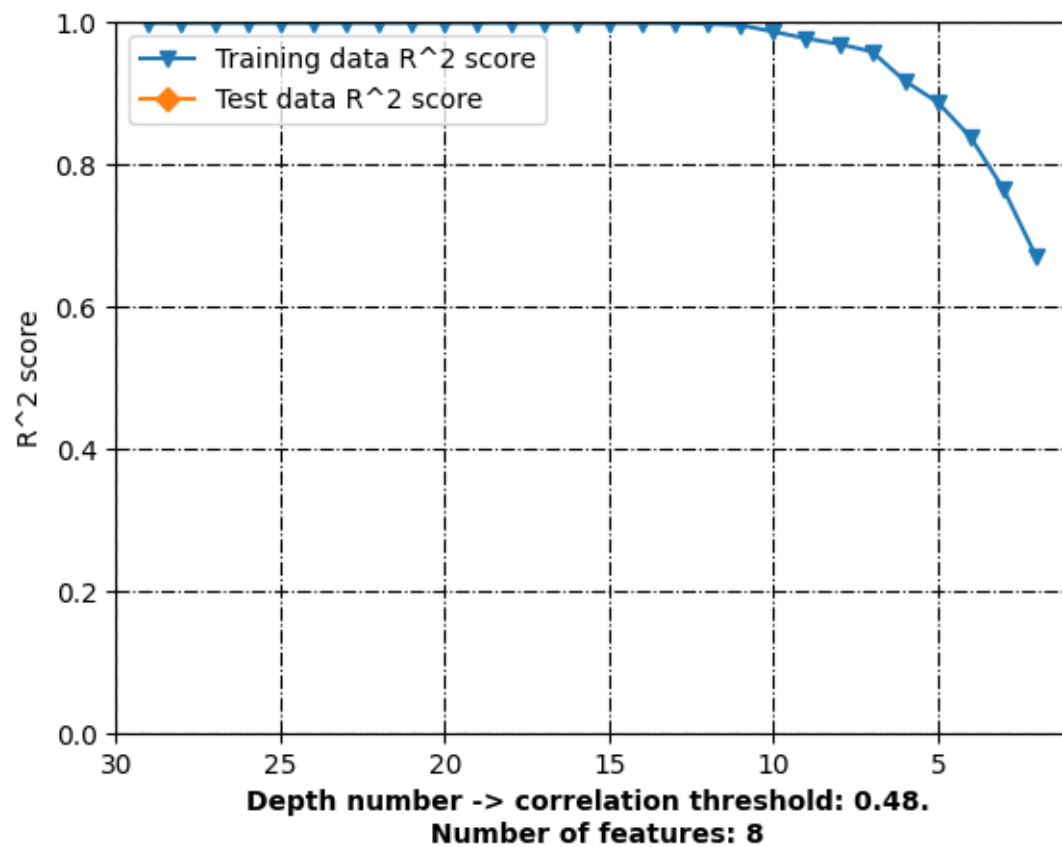

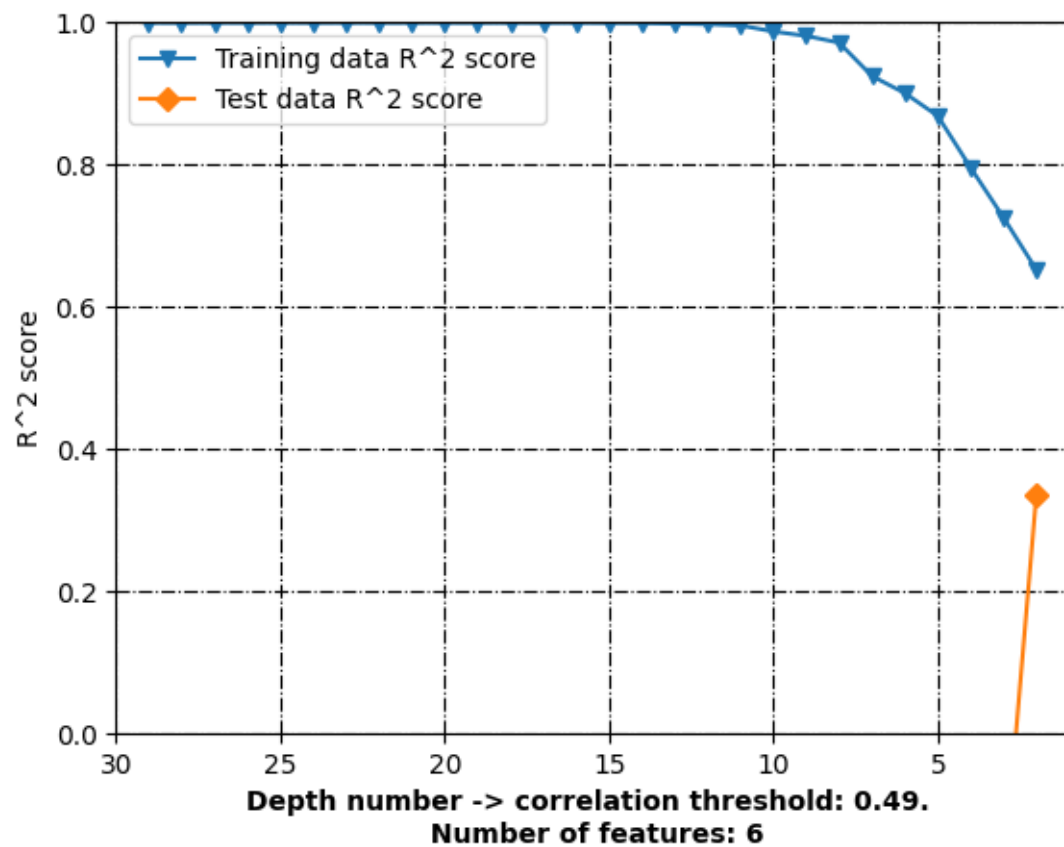

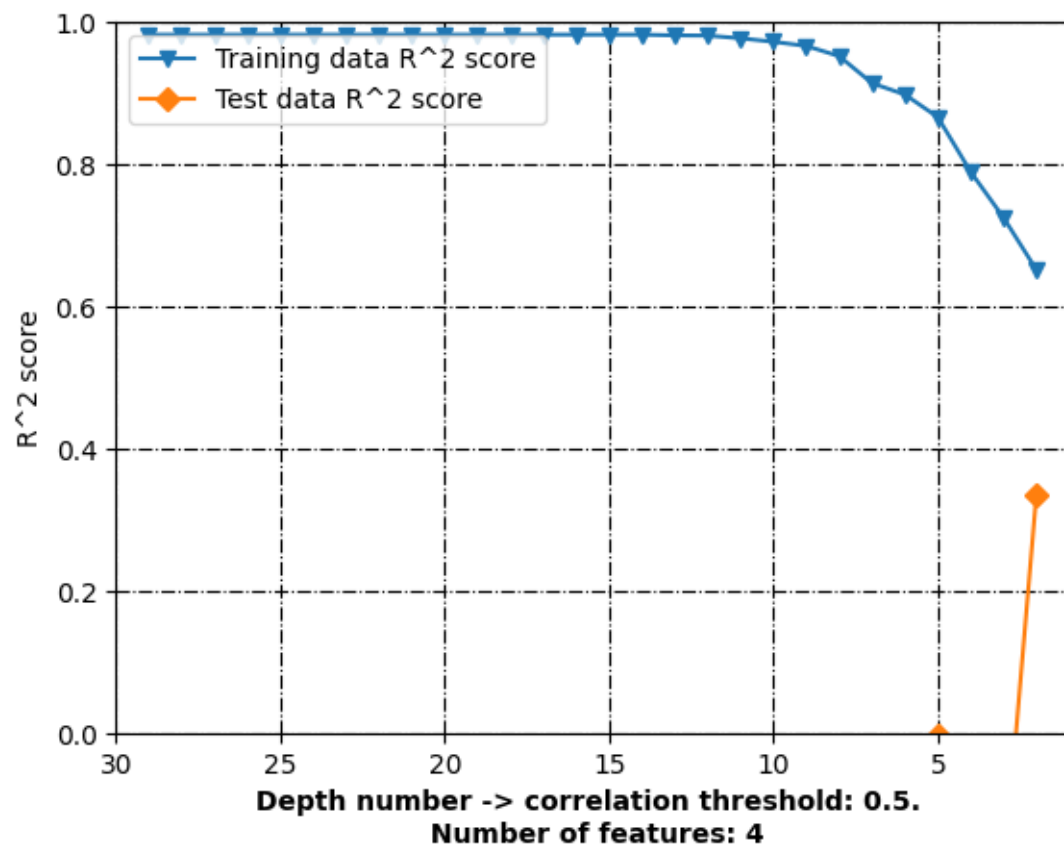

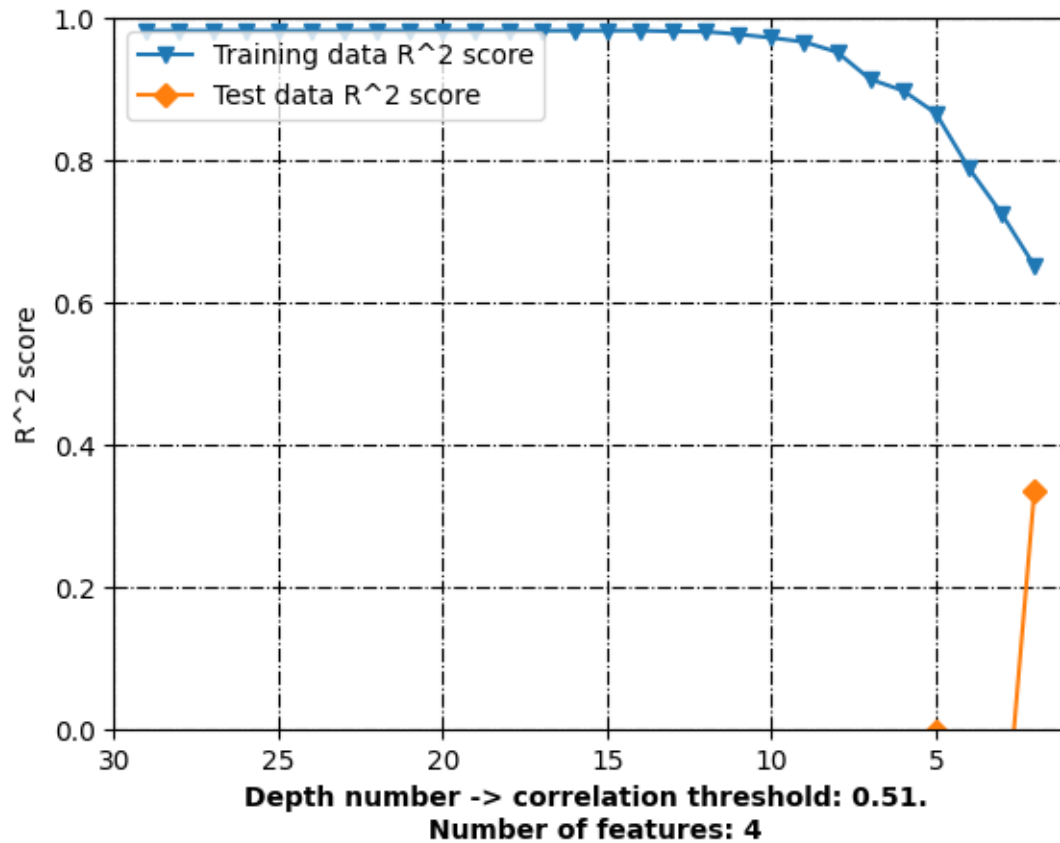

```
[20]: plt.plot(df_without_standardization['Correlation threshold'],  
             df_without_standardization['Number of features'], label = "Number of  
             features", marker='.')  
plt.legend()  
plt.xlabel('Correlation threshold')  
plt.ylabel('Number of features')  
plt.show()
```



[ ]:

### 3 Random Forest

```
[21]: without_standardization, train_r2_, test_r2_, hist1, hist2, target_column_name,
      ↪ training_data_RMSE, test_data_RMSE = pred_model.
      ↪ prepare_data_and_create_model(molecular_descriptors_df=data,
      ↪
      ↪         correlation_threshold=0.50,
      ↪
      ↪         standardization=False,
      ↪
      ↪         model_type='RandomForestRegressor',
      ↪
      ↪         n_estimators=12,
      ↪
      ↪         target_column_name = target,
      ↪
      ↪         random_state=random_state,
```

```

↪          train_test_split_=True,
↪          verbose=True)

```

I am not doing standardization...

```

molecular descriptor name
0          AATSOZ
1          AATSOare
2          AATSOd
3          AATSOdv
4          AATSOi
molecular descriptor name  corr_value
0          AATSOZ      -0.038502
1          AATSOare    -0.120847
2          AATSOd       0.041648
3          AATSOdv     -0.115899
4          AATSOi       0.191765
molecular descriptor name  corr_value  absolute correlation value
0          AATSOZ      -0.038502          0.038502
1          AATSOare    -0.120847          0.120847
2          AATSOd       0.041648          0.041648
3          AATSOdv     -0.115899          0.115899
4          AATSOi       0.191765          0.191765
molecular descriptor name  corr_value  absolute correlation value
226          AMID_0      -0.520578          0.520578
505          EState_VSA5 -0.578904          0.578904
506          EState_VSA6  0.519794          0.519794
791          MDEO-12     -0.525441          0.525441
1211         MCF-7       1.000000          1.000000
molecular descriptor name  corr_value  absolute correlation value
226          AMID_0      -0.520578          0.520578
505          EState_VSA5 -0.578904          0.578904
506          EState_VSA6  0.519794          0.519794
791          MDEO-12     -0.525441          0.525441
The model used is: RandomForest...
Return the coefficient of determination of the prediction:
0.4738764050596963
R^2 score: 0.9123281589088107
Correlation coefficient: 0.9551587087541058
Test data - unseen during training:
R^2 score: 0.4738764050596963
Correlation coefficient: 0.6883868135428629
[7.97408396 6.50095956 7.61650318 7.53828783 7.92073173 8.49185903
 8.18895309 7.68997471 7.25359702 7.85473599 8.04542871 7.37561052
 7.98444469 8.03751897 8.47521646 5.95134349 7.21864713 6.65187823]
113      8.022276
35       6.066513

```



```

101    6.920819
36     6.108463
100    7.376751
13     7.987163
0      7.987163
114    7.823909
104    8.397940
96     7.920819
40     8.091515
103    8.376751
48     7.886057
39     8.455932
14     8.086186
117    5.920819
21     8.113509
9      6.143150

```

Name: MCF-7, dtype: float64

Training Root Mean Square Error: 0.2868991378875584

Testing Root Mean Square Error: 0.625550282877547

```

[22]: print(target_column_name+str('_transformed'))
      print(hist1[target_column_name].hist())

```

MCF-7\_transformed

AxesSubplot(0.125,0.11;0.775x0.77)



```
[23]: with_standardization, train_r2_, test_r2_, hist1, hist2, target_column_name,
      ↪ training_data_RMSE, test_data_RMSE = pred_model.
      ↪ prepare_data_and_create_model(molecular_descriptors_df=data,
      ↪
      ↪         correlation_threshold=0.50,
      ↪
      ↪         standardization=True,
      ↪
      ↪         model_type='RandomForestRegressor',
      ↪
      ↪         n_estimators=12,
      ↪
      ↪         target_column_name = target,
      ↪
      ↪         random_state=random_state,
      ↪
      ↪         train_test_split_=True,
      ↪
      ↪         verbose=True)
```

I am doing standardization...

|     | molecular descriptor name |            |                            |
|-----|---------------------------|------------|----------------------------|
| 0   | AATSOZ                    |            |                            |
| 1   | AATSOare                  |            |                            |
| 2   | AATSOd                    |            |                            |
| 3   | AATSOdv                   |            |                            |
| 4   | AATSOi                    |            |                            |
|     | molecular descriptor name | corr_value |                            |
| 0   | AATSOZ                    | -0.038502  |                            |
| 1   | AATSOare                  | -0.120847  |                            |
| 2   | AATSOd                    | 0.041648   |                            |
| 3   | AATSOdv                   | -0.115899  |                            |
| 4   | AATSOi                    | 0.191765   |                            |
|     | molecular descriptor name | corr_value | absolute correlation value |
| 0   | AATSOZ                    | -0.038502  | 0.038502                   |
| 1   | AATSOare                  | -0.120847  | 0.120847                   |
| 2   | AATSOd                    | 0.041648   | 0.041648                   |
| 3   | AATSOdv                   | -0.115899  | 0.115899                   |
| 4   | AATSOi                    | 0.191765   | 0.191765                   |
|     | molecular descriptor name | corr_value | absolute correlation value |
| 226 | AMID_0                    | -0.520578  | 0.520578                   |
| 505 | EState_VSA5               | -0.578904  | 0.578904                   |
| 506 | EState_VSA6               | 0.519794   | 0.519794                   |
| 791 | MDE0-12                   | -0.525441  | 0.525441                   |

|      |                           |            |                            |
|------|---------------------------|------------|----------------------------|
| 1211 | MCF-7                     | 1.000000   | 1.000000                   |
|      | molecular descriptor name | corr_value | absolute correlation value |
| 226  | AMID_0                    | -0.520578  | 0.520578                   |
| 505  | EState_VSA5               | -0.578904  | 0.578904                   |
| 506  | EState_VSA6               | 0.519794   | 0.519794                   |
| 791  | MDEO-12                   | -0.525441  | 0.525441                   |

The model used is: RandomForest...

Return the coefficient of determination of the prediction:

0.4738764050596963

R<sup>2</sup> score: 0.9123281589088107

Correlation coefficient: 0.9551587087541058

Test data - unseen during training:

R<sup>2</sup> score: 0.4738764050596963

Correlation coefficient: 0.6883868135428629

[7.97408396 6.50095956 7.61650318 7.53828783 7.92073173 8.49185903  
8.18895309 7.68997471 7.25359702 7.85473599 8.04542871 7.37561052  
7.98444469 8.03751897 8.47521646 5.95134349 7.21864713 6.65187823]

113 8.022276  
35 6.066513  
101 6.920819  
36 6.108463  
100 7.376751  
13 7.987163  
0 7.987163  
114 7.823909  
104 8.397940  
96 7.920819  
40 8.091515  
103 8.376751  
48 7.886057  
39 8.455932  
14 8.086186  
117 5.920819  
21 8.113509  
9 6.143150

Name: MCF-7, dtype: float64

Training Root Mean Square Error: 0.2868991378875584

Testing Root Mean Square Error: 0.625550282877547

### 3.1 Search inside correlation space

```
[24]: step = 0.01
      initial_step = corr_low
      last_step = corr_high
      first_list = [x / 100.0 for x in range(int(initial_step*100),
      ↪int(last_step*100), int(step*100))]
      n_estimators = [range(2,21,1)]
```

```

corr_th = []
second_list = []
third_list = []
fourth_l = []
fifth_l = []
f_list = []
fif_list = []
for i in first_list:

    for estimator in n_estimators[0]:

        without_standardization, train_r2, test_r2, _, h_, target_column_name,
        ↪ training_data_RMSE, test_data_RMSE = pred_model.
        ↪ prepare_data_and_create_model(molecular_descriptors_df=data,

        ↪
                                correlation_threshold=i,
                                ↪
                                standardization=False,
                                ↪
                                model_type='RandomForestRegressor',
                                ↪
                                n_estimators_=estimator,
                                ↪
                                target_column_name = target,
                                ↪
                                random_state=random_state,
                                ↪
                                train_test_split_=True,
                                ↪
                                verbose=False)
        corr_th.append(i)
        second_list.append(train_r2)
        third_list.append(test_r2)
        fourth_l.append(training_data_RMSE)
        fifth_l.append(test_data_RMSE)
        f_list.append(len(h_))
        fif_list.append(estimator)

```

```

[25]: df_without_standardization = pd.DataFrame(data=corr_th, columns=["Correlation_
        ↪ threshold"])
df_without_standardization['Training data R^2 score'] = second_list
df_without_standardization['Test data R^2 score'] = third_list
df_without_standardization['Training RMSE'] = fourth_l
df_without_standardization['Test RMSE'] = fifth_l
df_without_standardization['Number of features'] = f_list
df_without_standardization['Number of estimators'] = fif_list

```

```

[26]: df_random_forest = df_without_standardization.copy()
      #df_without_standardization.to_excel('../Data/
      ↪A549_Random_forest_rs_'+str(random_state)+'.xlsx')

[27]: corre_list = [x / 100.0 for x in range(int(initial_step*100),
      ↪int(last_step*100), int(0.01*100))]
      for element in corre_list:
          element_ =
          ↪df_without_standardization[df_without_standardization['Correlation_
          ↪threshold'] == float(element)]
          plt.plot(element_['Number of estimators'], element_['Training data R^2_
          ↪score'], label = "Training data R^2 score", marker='v')
          plt.plot(element_['Number of estimators'], element_['Test data R^2 score'],
          ↪label = "Test data R^2 score", marker='D')
          plt.legend()
          plt.xlabel('Number of estimators -> correlation threshold: '+str(element)+'.'
          ↪\n Number of features: '+str(element_['Number of features'].iloc[0]))
          plt.xlim(max(element_['Number of estimators'])+1, min(element_['Number of_
          ↪estimators'])-1)
          plt.ylabel('R^2 score')
          plt.ylim([0, 1])
          plt.rc('grid', linestyle="-. ", color='black')
          plt.grid(True)
          plt.show()

```

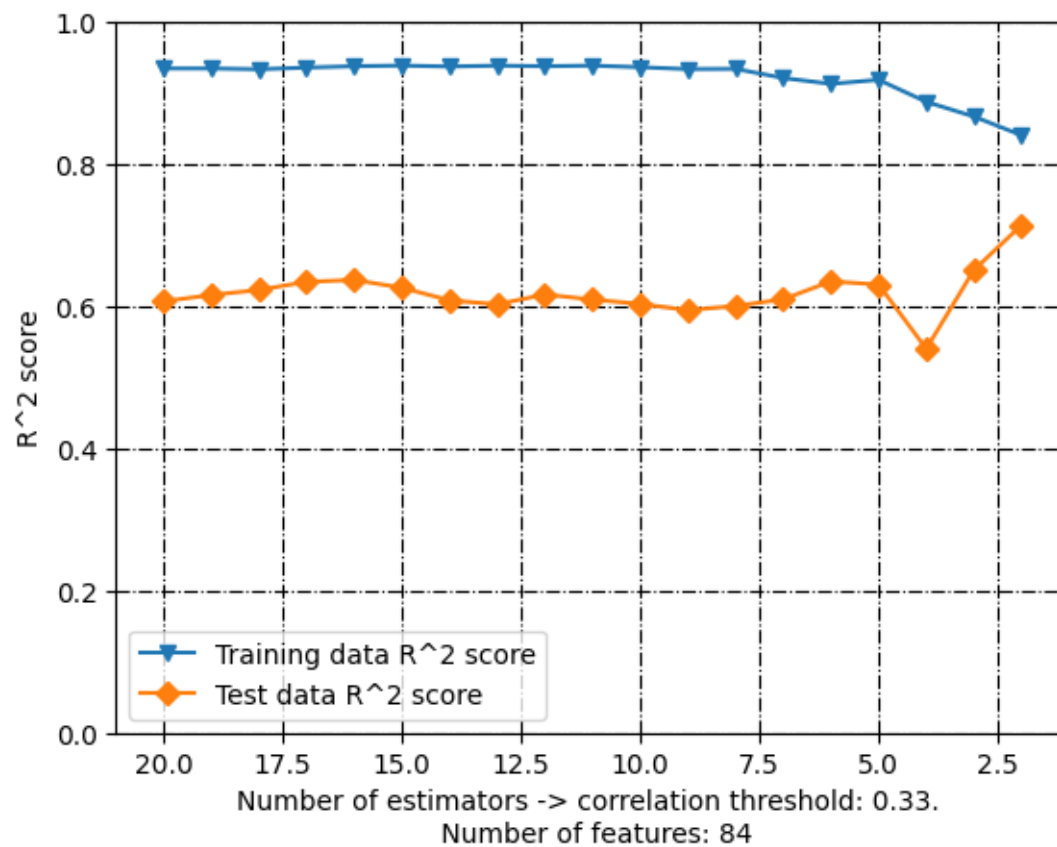

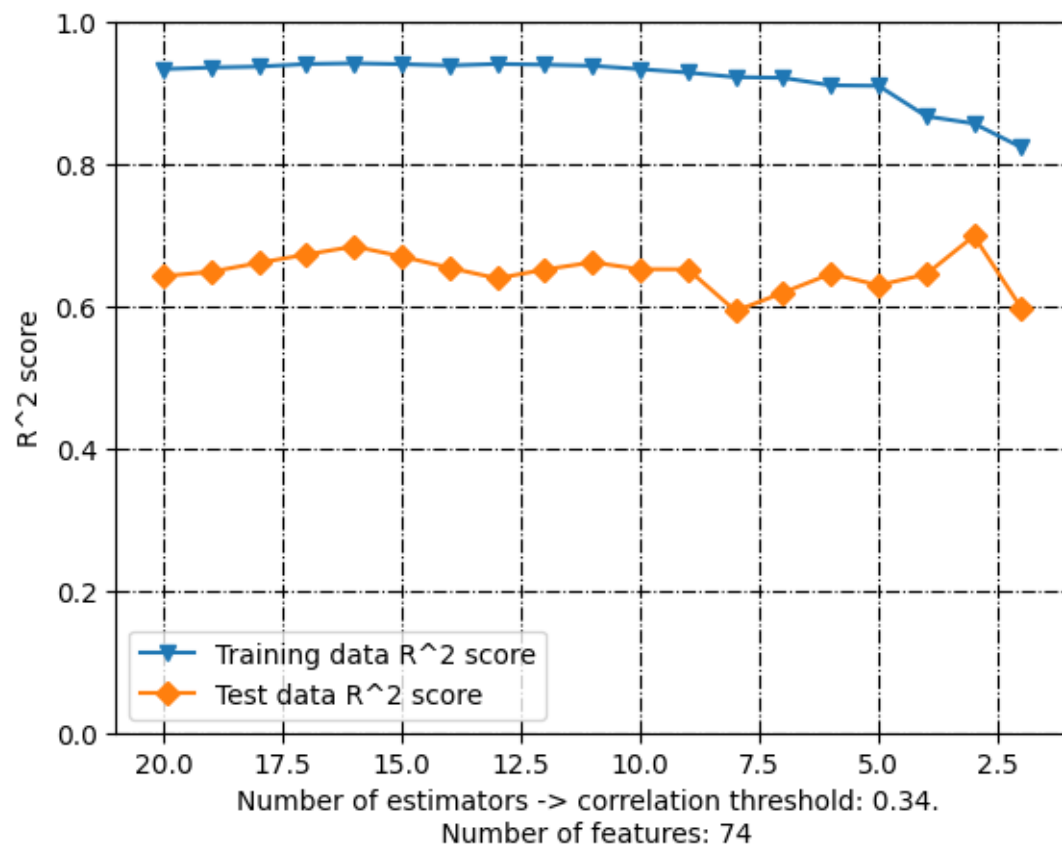

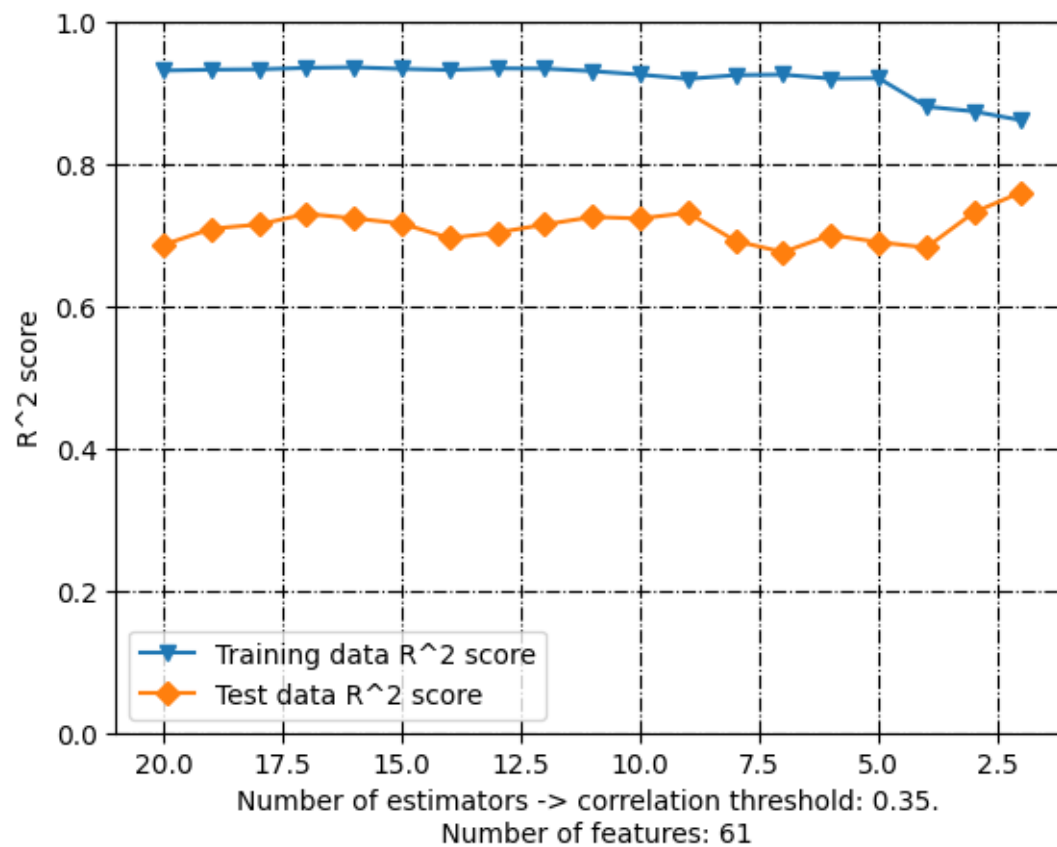



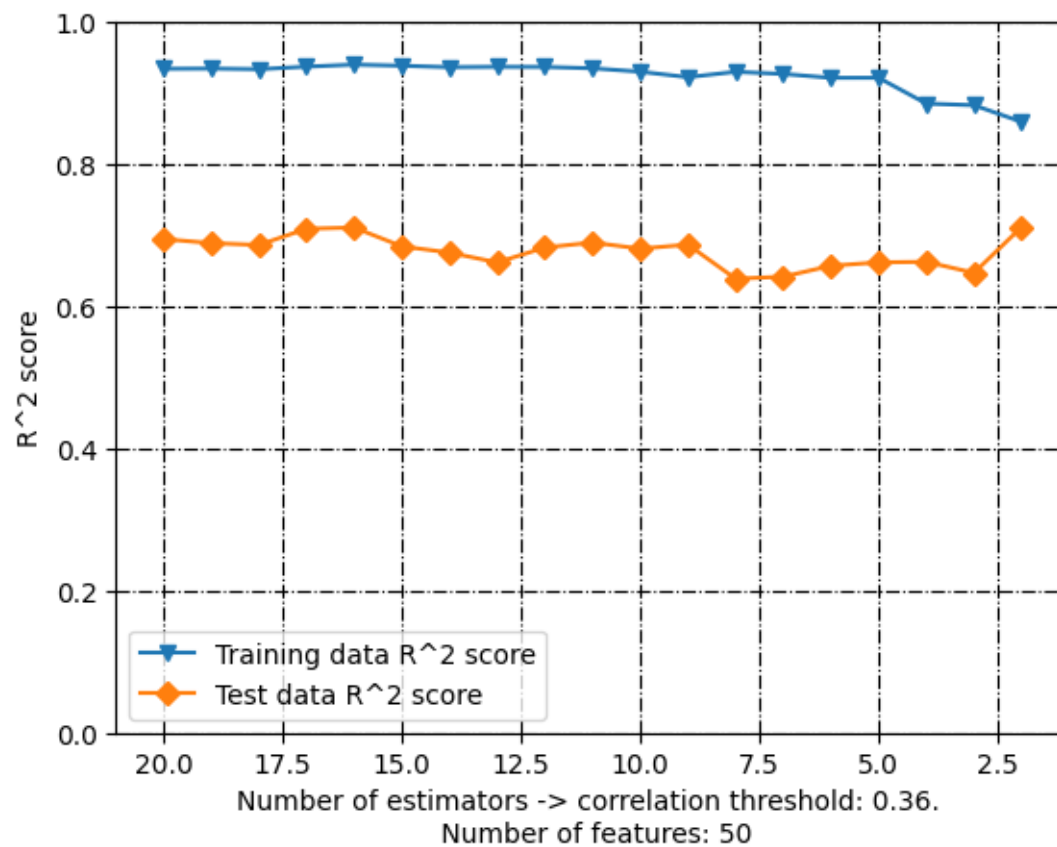

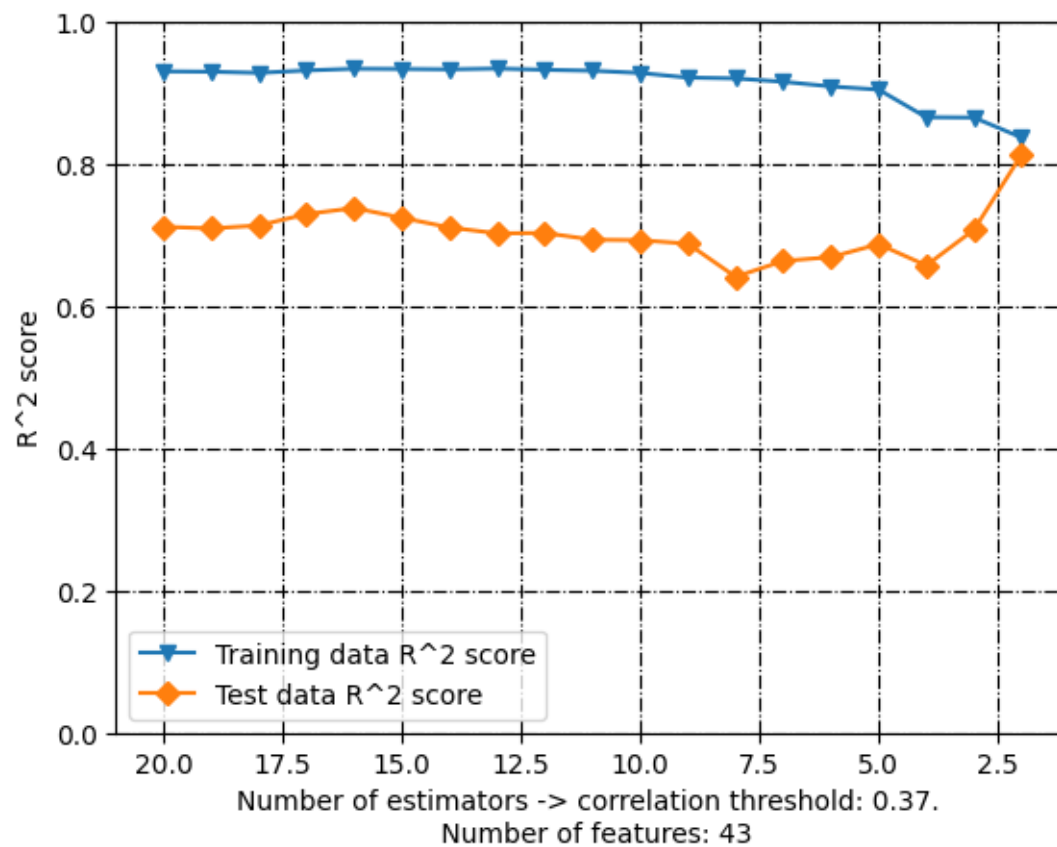

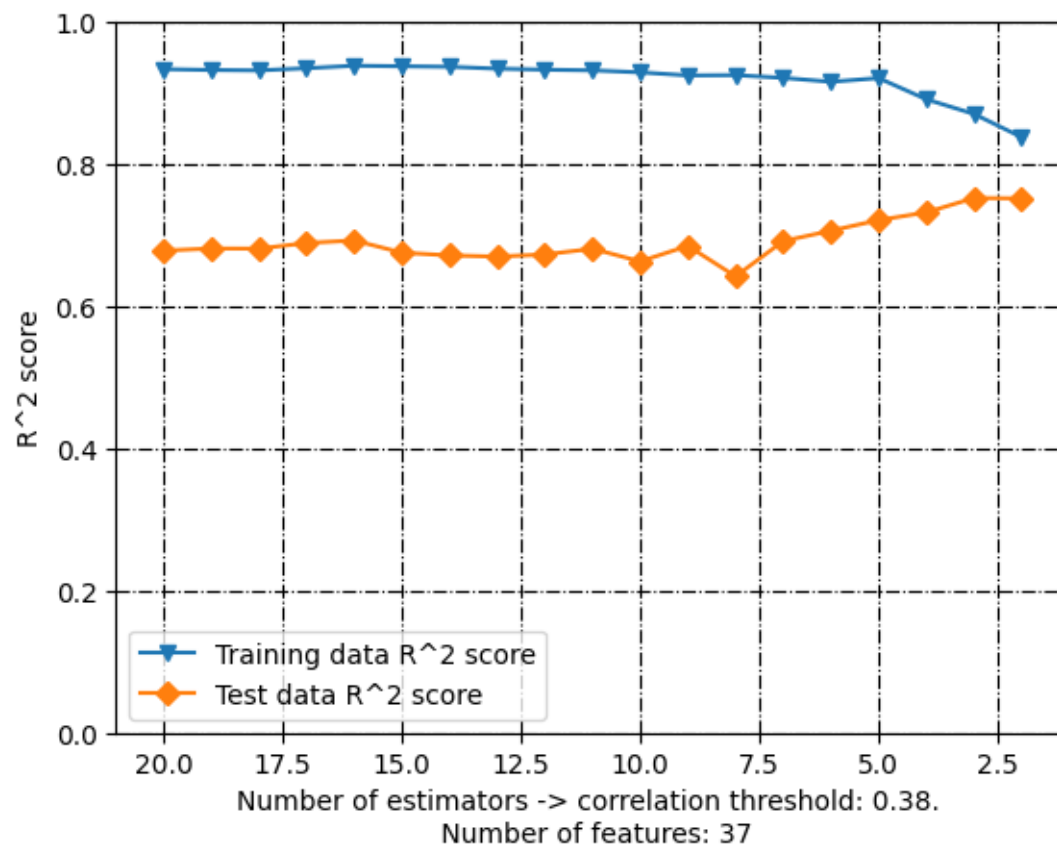

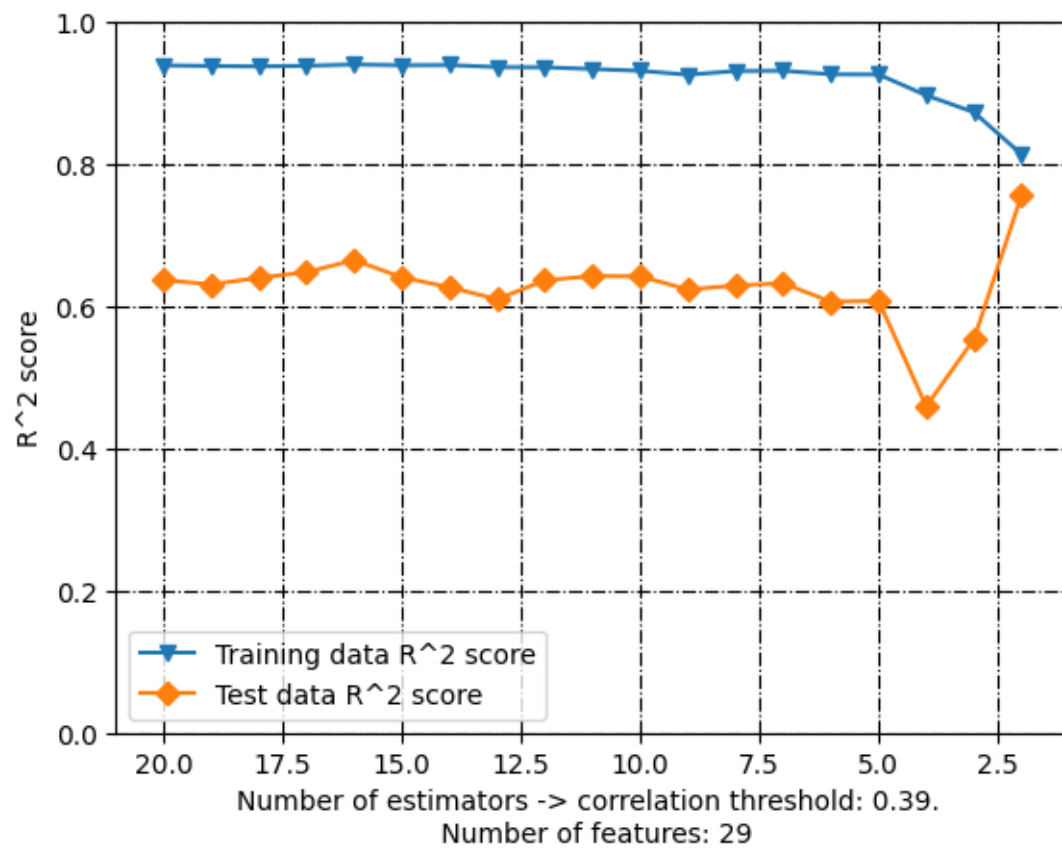

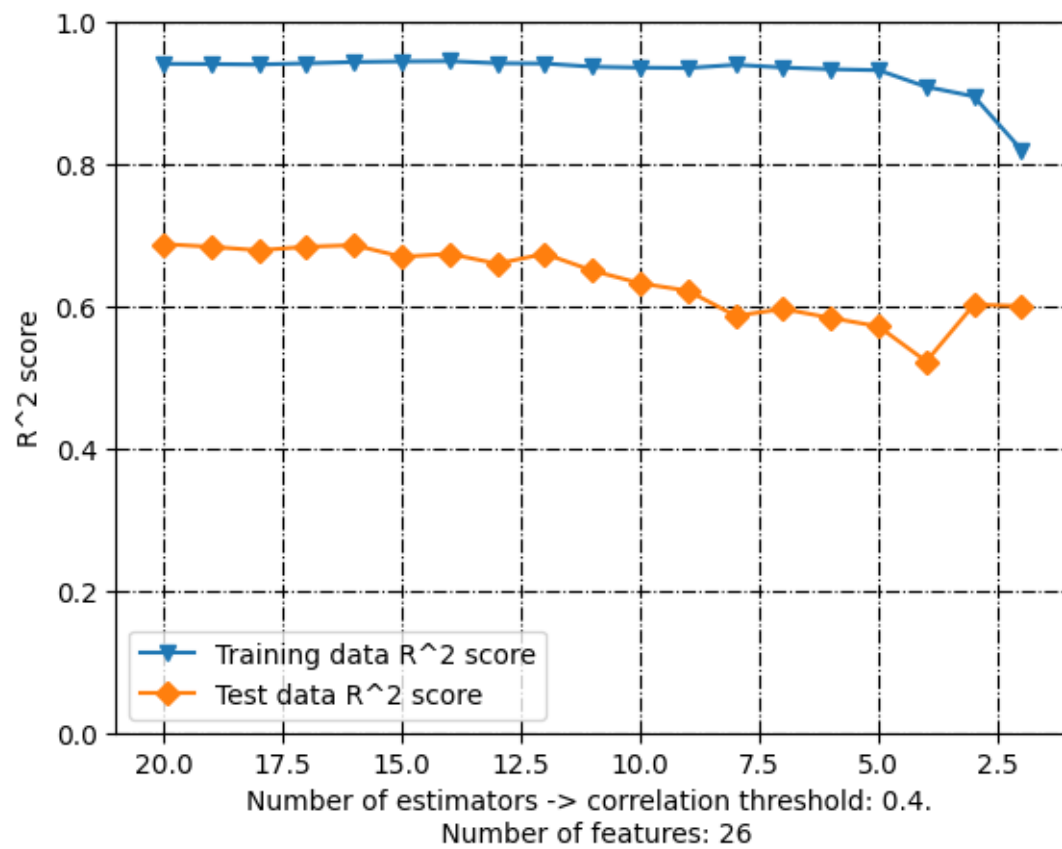

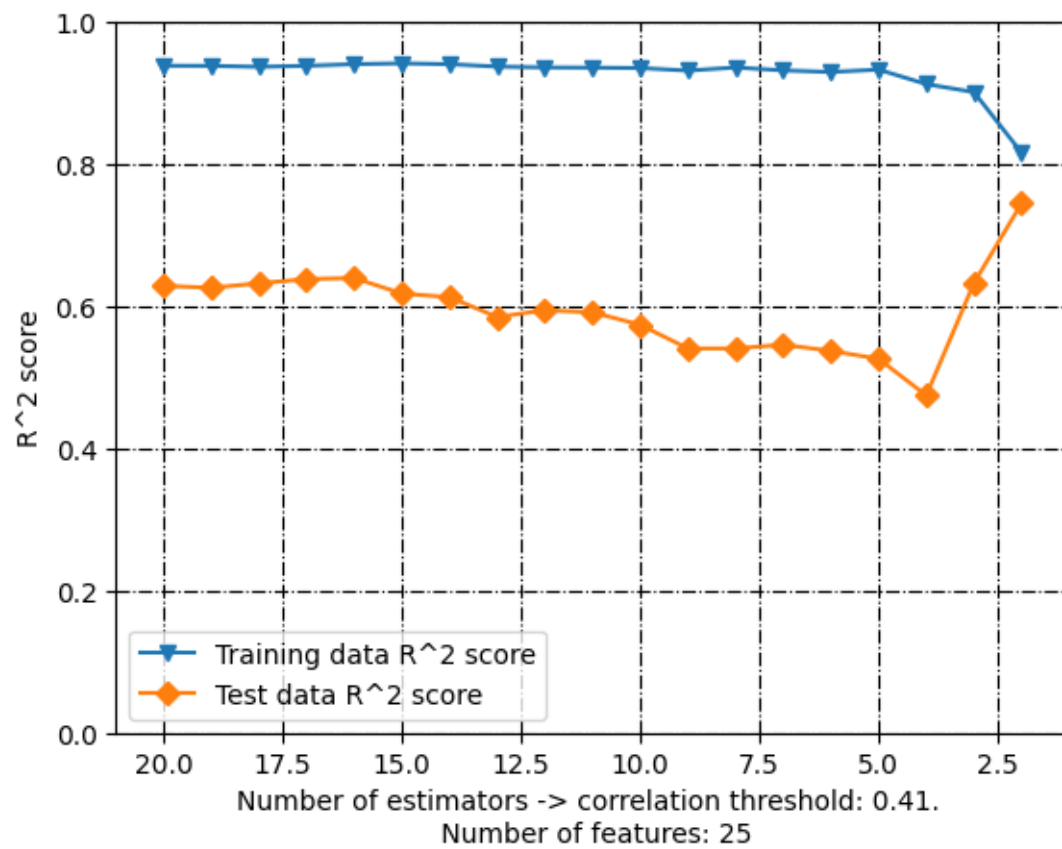

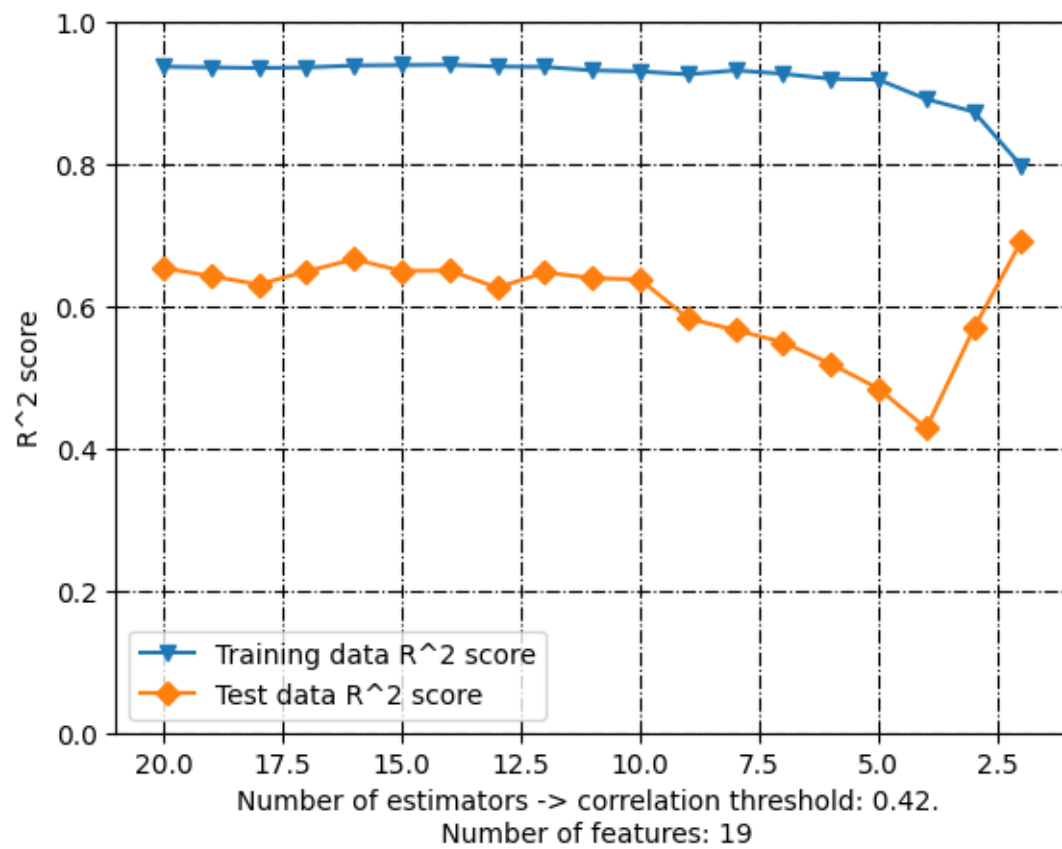

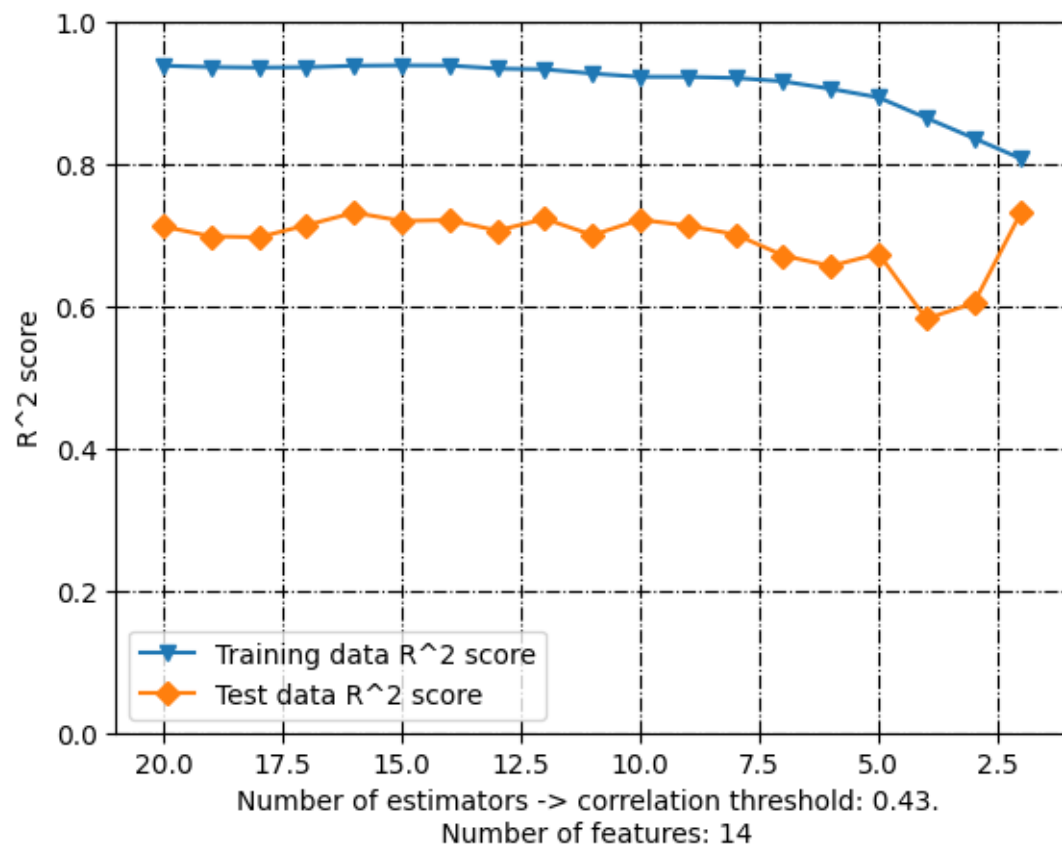



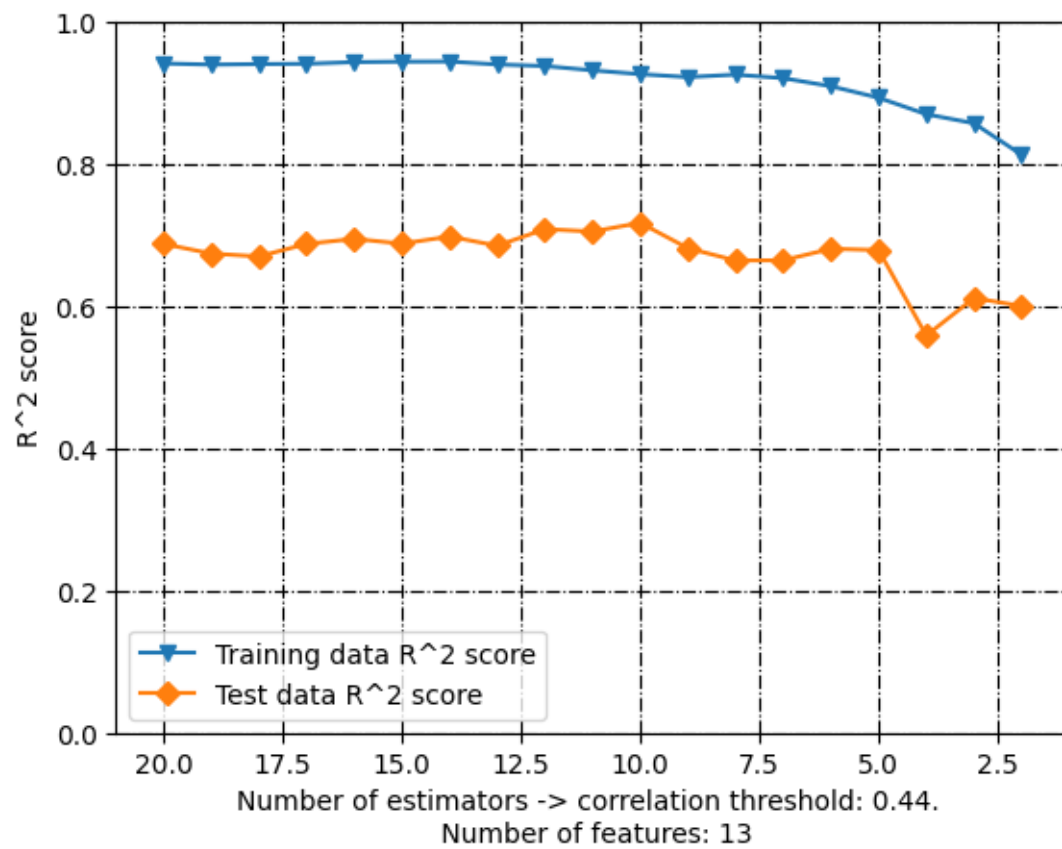

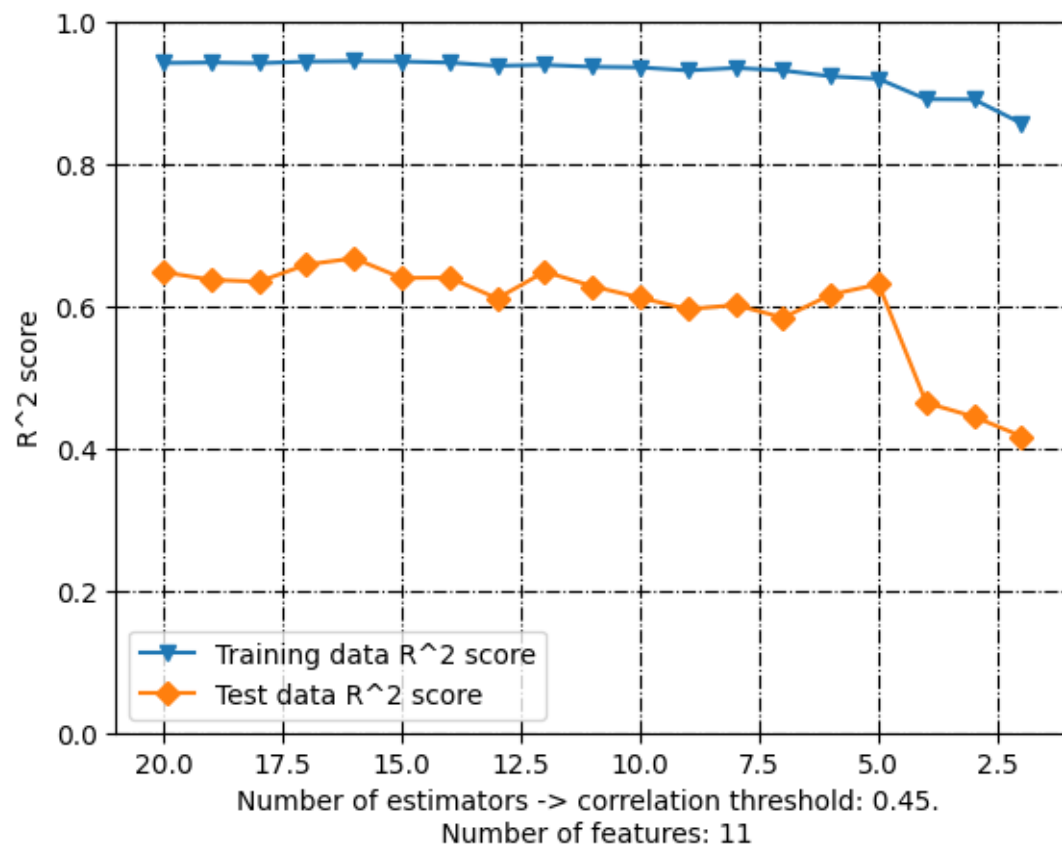

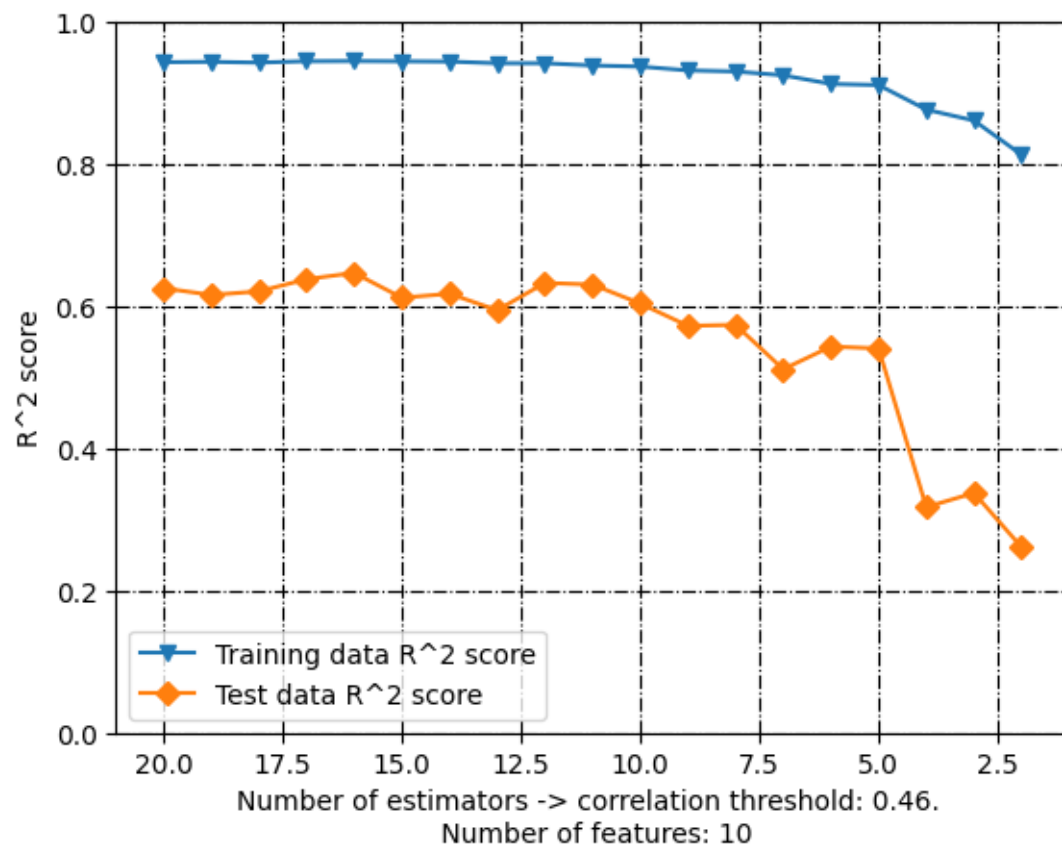

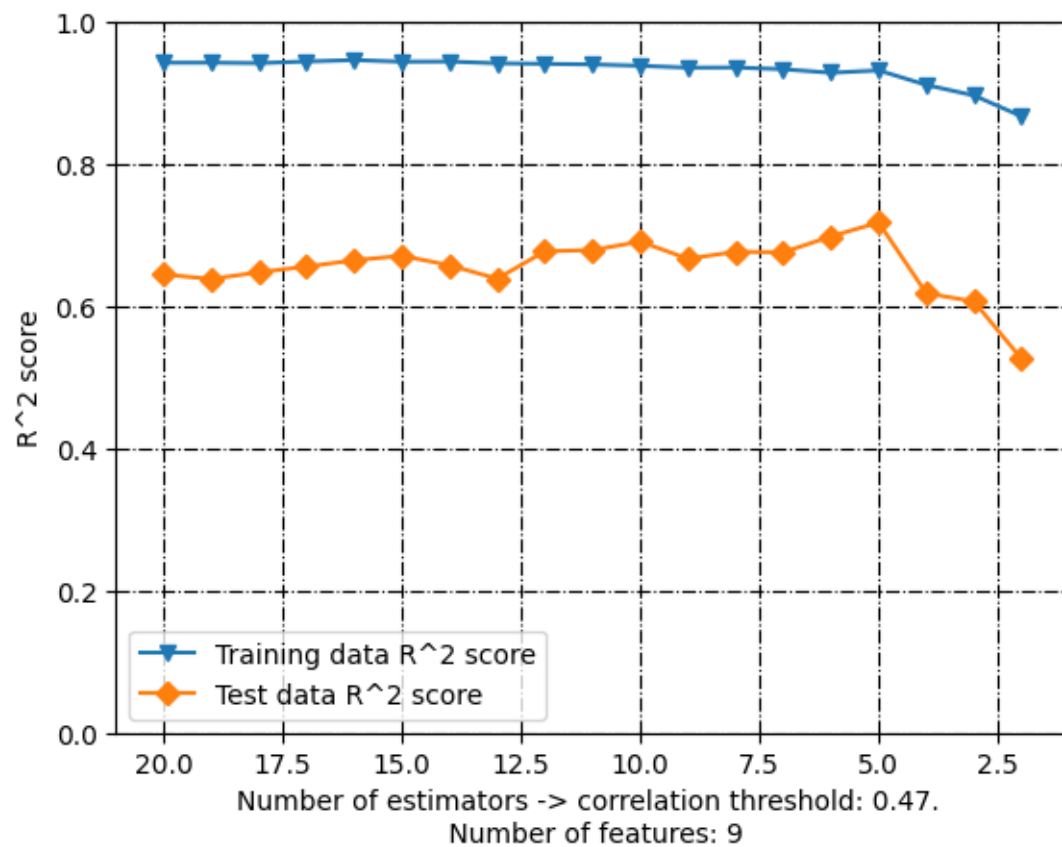

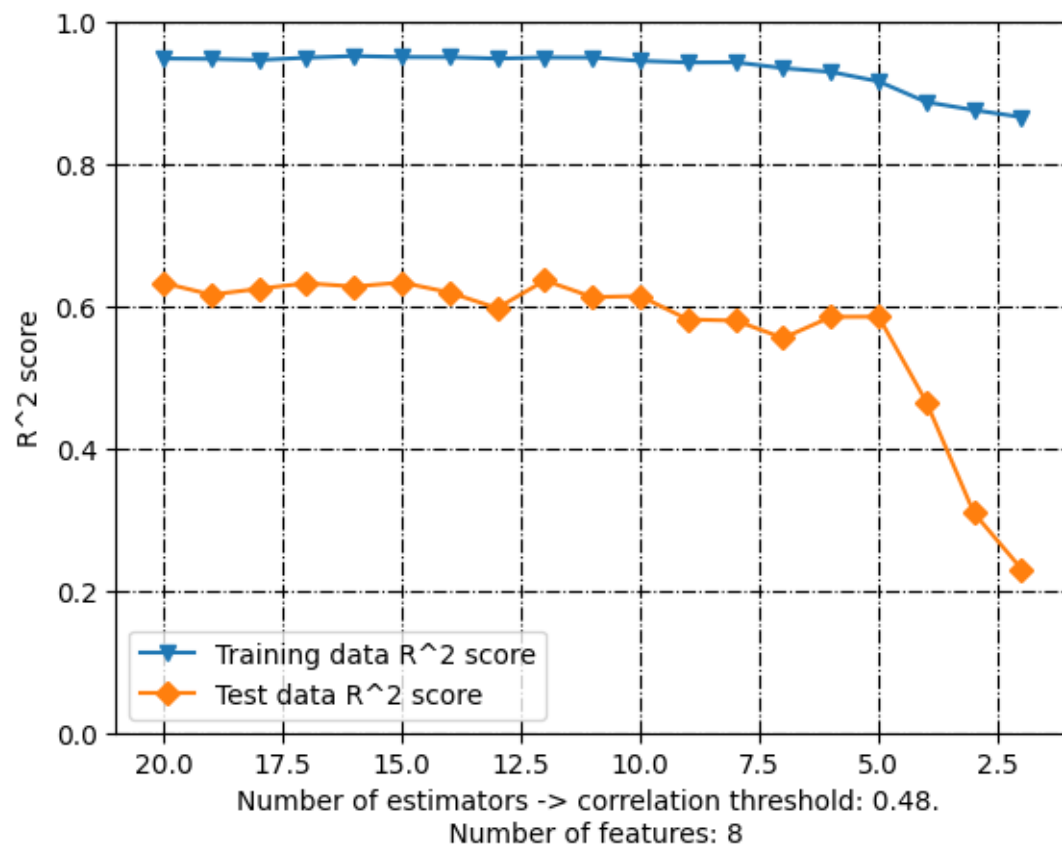

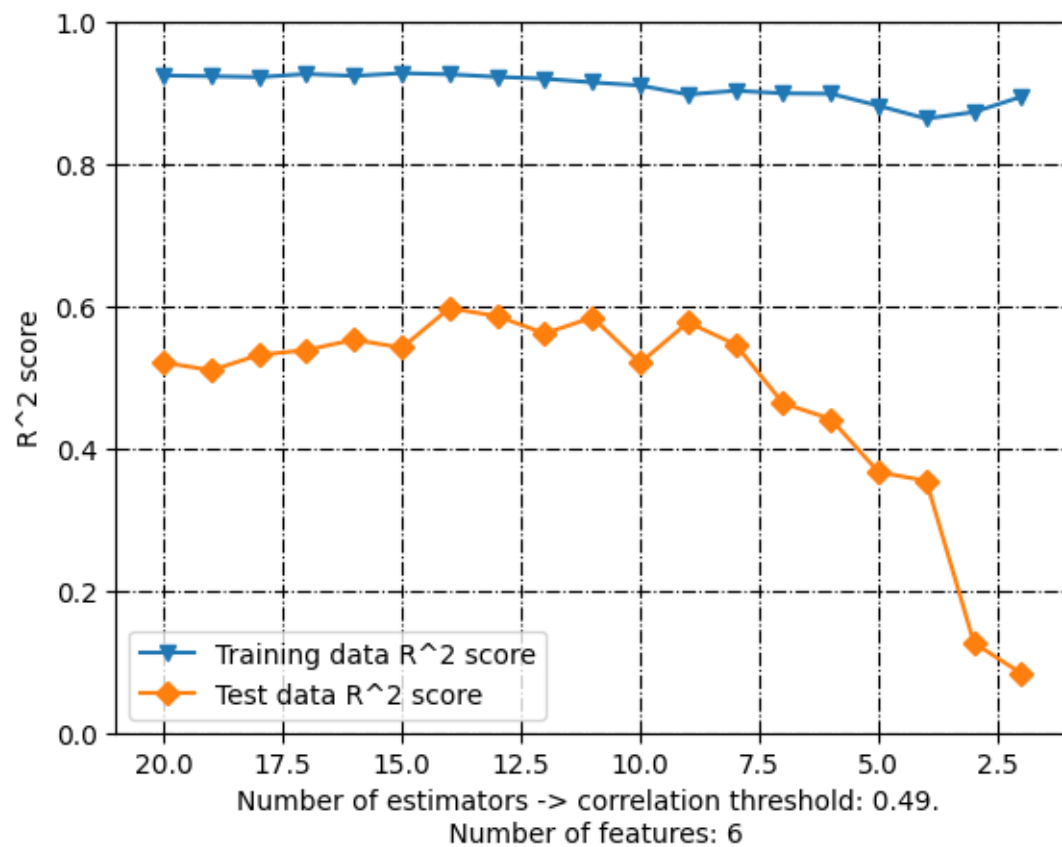

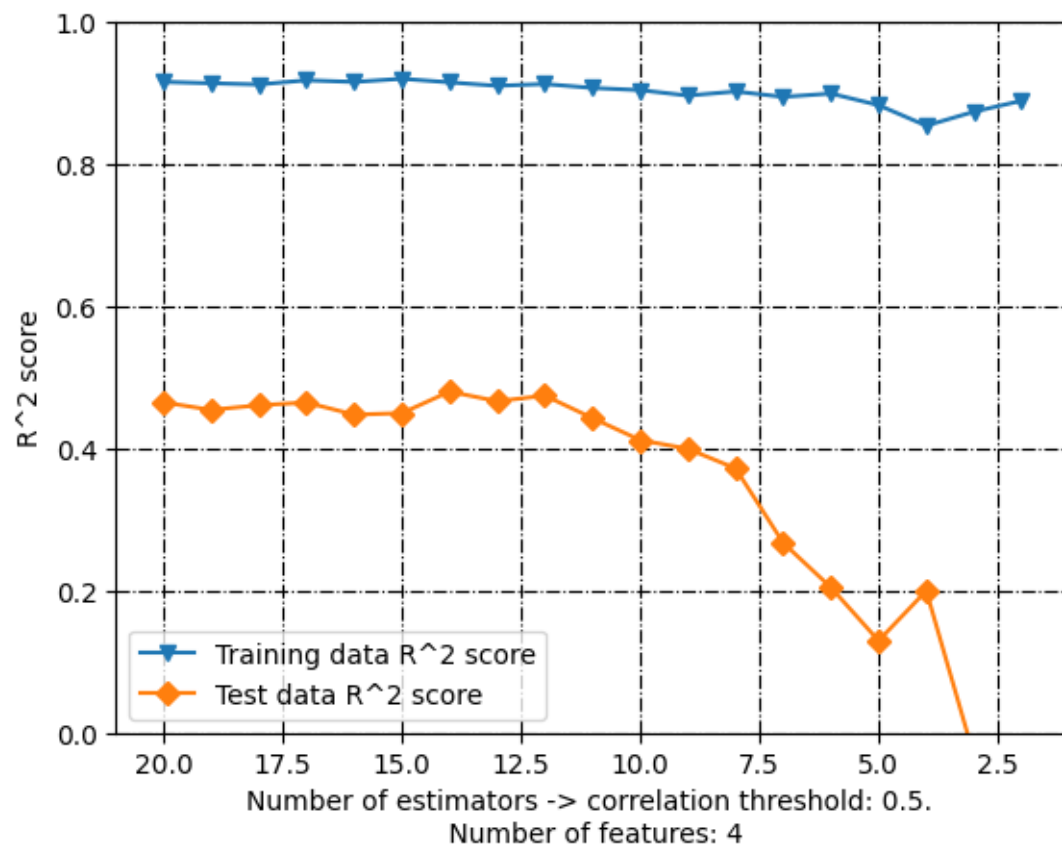

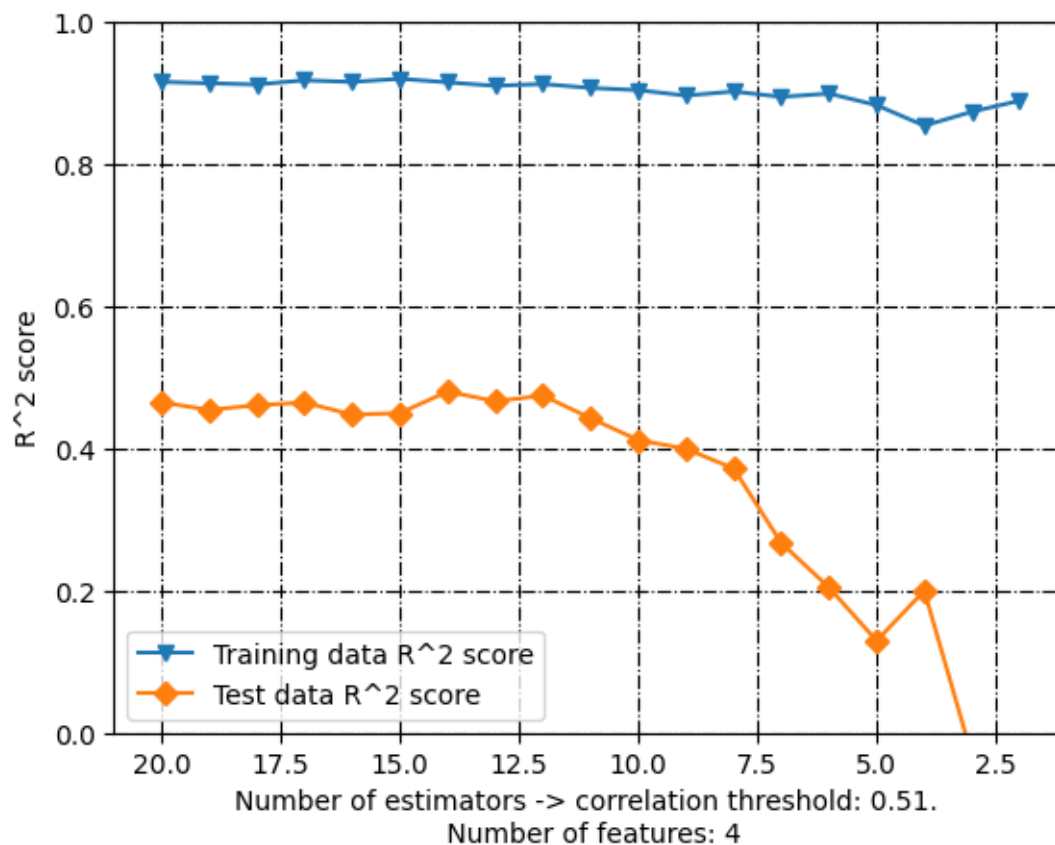

```
[28]: plt.plot(df_without_standardization['Correlation threshold'],  
             df_without_standardization['Number of features'], label = "Number of  
             features", marker='.')  
plt.legend()  
plt.xlabel('Correlation threshold')  
plt.ylabel('Number of features')  
plt.show()
```





[ ]:

## 4 KNeighborsRegressor

```
[29]: without_standardization, train_r2_, test_r2_, hist1, hist2, target_column_name,
      ↪ training_data_RMSE, test_data_RMSE = pred_model.
      ↪ prepare_data_and_create_model(molecular_descriptors_df=data,
      ↪
      ↪ correlation_threshold=0.50,
      ↪
      ↪ standardization=False,
      ↪
      ↪ model_type='KNeighborsRegressor',
      ↪
      ↪ target_column_name = target,
      ↪
      ↪ random_state=random_state,
      ↪
      ↪ train_test_split_=True,
```



verbose=True)



I am not doing standardization...

```
molecular descriptor name
0          AATSOZ
1          AATSOare
2          AATSOd
3          AATSOdv
4          AATSOi
molecular descriptor name  corr_value
0          AATSOZ          -0.038502
1          AATSOare        -0.120847
2          AATSOd           0.041648
3          AATSOdv         -0.115899
4          AATSOi           0.191765
molecular descriptor name  corr_value  absolute correlation value
0          AATSOZ          -0.038502          0.038502
1          AATSOare        -0.120847          0.120847
2          AATSOd           0.041648          0.041648
3          AATSOdv         -0.115899          0.115899
4          AATSOi           0.191765          0.191765
molecular descriptor name  corr_value  absolute correlation value
226          AMID_0        -0.520578          0.520578
505          EState_VSA5    -0.578904          0.578904
506          EState_VSA6     0.519794          0.519794
791          MDEO-12        -0.525441          0.525441
1211         MCF-7          1.000000          1.000000
molecular descriptor name  corr_value  absolute correlation value
226          AMID_0        -0.520578          0.520578
505          EState_VSA5    -0.578904          0.578904
506          EState_VSA6     0.519794          0.519794
791          MDEO-12        -0.525441          0.525441
The model used is: KNeighbors...
Return the coefficient of determination of the prediction:
0.17887598286330386
R^2 score: 0.5373267326789486
Correlation coefficient: 0.7330257380740111
Test data - unseen during training:
R^2 score: 0.17887598286330386
Correlation coefficient: 0.4229373273468586
[8.27886876 6.39366104 7.6963417 6.53369885 7.95214323 7.55661724
 7.94489513 8.26275858 6.18458136 7.8150608 7.57914848 8.14325294
 7.83929455 8.13033937 7.35856211 7.57972486 7.58116176 6.79653745]
113      8.022276
35       6.066513
101      6.920819
36       6.108463
```

```

100    7.376751
13     7.987163
0      7.987163
114    7.823909
104    8.397940
96     7.920819
40     8.091515
103    8.376751
48     7.886057
39     8.455932
14     8.086186
117    5.920819
21     8.113509
9      6.143150
Name: MCF-7, dtype: float64
Training Root Mean Square Error: 0.659077344888441
Testing Root Mean Square Error: 0.7814887183280818

```

```
[30]: print(target_column_name+str('_transformed'))
      print(hist1[target_column_name].hist())
```

```

MCF-7_transformed
AxesSubplot(0.125,0.11;0.775x0.77)

```



```
[31]: with_standardization, train_r2_, test_r2_, hist1, hist2, target_column_name,
      ↪ training_data_RMSE, test_data_RMSE = pred_model.
      ↪ prepare_data_and_create_model(molecular_descriptors_df=data,
      ↪
      ↪         correlation_threshold=0.50,
      ↪
      ↪         standardization=True,
      ↪
      ↪         model_type='KNeighborsRegressor',
      ↪
      ↪         target_column_name = target,
      ↪
      ↪         random_state=random_state,
      ↪
      ↪         train_test_split_=True,
      ↪
      ↪         verbose=True)
```

I am doing standardization...

|      | molecular descriptor name |            |                            |
|------|---------------------------|------------|----------------------------|
| 0    | AATSOZ                    |            |                            |
| 1    | AATSOare                  |            |                            |
| 2    | AATSOd                    |            |                            |
| 3    | AATSOdv                   |            |                            |
| 4    | AATSOi                    |            |                            |
|      | molecular descriptor name | corr_value |                            |
| 0    | AATSOZ                    | -0.038502  |                            |
| 1    | AATSOare                  | -0.120847  |                            |
| 2    | AATSOd                    | 0.041648   |                            |
| 3    | AATSOdv                   | -0.115899  |                            |
| 4    | AATSOi                    | 0.191765   |                            |
|      | molecular descriptor name | corr_value | absolute correlation value |
| 0    | AATSOZ                    | -0.038502  | 0.038502                   |
| 1    | AATSOare                  | -0.120847  | 0.120847                   |
| 2    | AATSOd                    | 0.041648   | 0.041648                   |
| 3    | AATSOdv                   | -0.115899  | 0.115899                   |
| 4    | AATSOi                    | 0.191765   | 0.191765                   |
|      | molecular descriptor name | corr_value | absolute correlation value |
| 226  | AMID_0                    | -0.520578  | 0.520578                   |
| 505  | EState_VSA5               | -0.578904  | 0.578904                   |
| 506  | EState_VSA6               | 0.519794   | 0.519794                   |
| 791  | MDEO-12                   | -0.525441  | 0.525441                   |
| 1211 | MCF-7                     | 1.000000   | 1.000000                   |
|      | molecular descriptor name | corr_value | absolute correlation value |
| 226  | AMID_0                    | -0.520578  | 0.520578                   |
| 505  | EState_VSA5               | -0.578904  | 0.578904                   |
| 506  | EState_VSA6               | 0.519794   | 0.519794                   |

```

791                MDE0-12    -0.525441                0.525441
The model used is: KNeighbors...
Return the coefficient of determination of the prediction:
0.17887598286330386
R^2 score: 0.5373267326789486
Correlation coefficient: 0.7330257380740111
Test data - unseen during training:
R^2 score: 0.17887598286330386
Correlation coefficient: 0.4229373273468586
[8.27886876 6.39366104 7.6963417  6.53369885 7.95214323 7.55661724
 7.94489513 8.26275858 6.18458136 7.8150608  7.57914848 8.14325294
 7.83929455 8.13033937 7.35856211 7.57972486 7.58116176 6.79653745]
113      8.022276
35       6.066513
101      6.920819
36       6.108463
100      7.376751
13       7.987163
0        7.987163
114      7.823909
104      8.397940
96       7.920819
40       8.091515
103      8.376751
48       7.886057
39       8.455932
14       8.086186
117      5.920819
21       8.113509
9        6.143150
Name: MCF-7, dtype: float64
Training Root Mean Square Error: 0.659077344888441
Testing Root Mean Square Error: 0.7814887183280818

```

#### 4.1 Search inside correlation space

```

[32]: step = 0.01
initial_step = corr_low
last_step = corr_high
first_list = [x / 100.0 for x in range(int(initial_step*100),
    ↪int(last_step*100), int(step*100))]
second_list = []
third_list = []
fourth_l = []
fifth_l = []
f_list = []
for i in first_list:

```

```

        without_standardization, train_r2, test_r2, _, h_, target_column_name,
        training_data_RMSE, test_data_RMSE = pred_model.
        prepare_data_and_create_model(molecular_descriptors_df = data,

        correlation_threshold = i,

        standardization = False,

        model_type = 'KNeighborsRegressor',

        target_column_name = target,

        random_state=random_state,

        train_test_split_ = True,

        verbose = False)
    second_list.append(train_r2)
    third_list.append(test_r2)
    fourth_l.append(training_data_RMSE)
    fifth_l.append(test_data_RMSE)
    f_list.append(len(h_))

```

File "C:\Users\aleks\anaconda3\envs\cheminf\_gpu\lib\site-packages\joblib\externals\loky\backend\context.py", line 217, in \_count\_physical\_cores  
 raise ValueError(

```

[33]: df_without_standardization = pd.DataFrame(data=first_list,
        columns=["Correlation threshold"])
df_without_standardization['Training data R^2 score'] = second_list
df_without_standardization['Test data R^2 score'] = third_list
df_without_standardization['Training RMSE'] = fourth_l
df_without_standardization['Test RMSE'] = fifth_l
df_without_standardization['Number of features'] = f_list

```

```

[34]: df_k_nearest = df_without_standardization.copy()
df_without_standardization

```

```

[34]:
Correlation threshold  Training data R^2 score  Test data R^2 score \
0                    0.33                    0.608638          0.016137
1                    0.34                    0.609763          0.016137
2                    0.35                    0.617607          0.005978
3                    0.36                    0.636317          0.004067
4                    0.37                    0.629161          0.003452
5                    0.38                    0.720982          0.334651
6                    0.39                    0.715501          0.334651

```

|    |      |          |          |
|----|------|----------|----------|
| 7  | 0.40 | 0.710436 | 0.334651 |
| 8  | 0.41 | 0.698984 | 0.324017 |
| 9  | 0.42 | 0.617632 | 0.109773 |
| 10 | 0.43 | 0.568566 | 0.070934 |
| 11 | 0.44 | 0.568547 | 0.070934 |
| 12 | 0.45 | 0.565701 | 0.070934 |
| 13 | 0.46 | 0.569946 | 0.112757 |
| 14 | 0.47 | 0.569946 | 0.112757 |
| 15 | 0.48 | 0.569946 | 0.112892 |
| 16 | 0.49 | 0.554510 | 0.181851 |
| 17 | 0.50 | 0.537327 | 0.178876 |
| 18 | 0.51 | 0.537327 | 0.178876 |

|    | Training RMSE | Test RMSE | Number of features |
|----|---------------|-----------|--------------------|
| 0  | 0.606162      | 0.855432  | 84                 |
| 1  | 0.605289      | 0.855432  | 74                 |
| 2  | 0.599175      | 0.859838  | 61                 |
| 3  | 0.584333      | 0.860664  | 50                 |
| 4  | 0.590055      | 0.860929  | 43                 |
| 5  | 0.511818      | 0.703466  | 37                 |
| 6  | 0.516821      | 0.703466  | 29                 |
| 7  | 0.521400      | 0.703466  | 26                 |
| 8  | 0.531611      | 0.709066  | 25                 |
| 9  | 0.599156      | 0.813708  | 19                 |
| 10 | 0.636438      | 0.831269  | 14                 |
| 11 | 0.636453      | 0.831269  | 13                 |
| 12 | 0.638548      | 0.831269  | 11                 |
| 13 | 0.635420      | 0.812343  | 10                 |
| 14 | 0.635420      | 0.812343  | 9                  |
| 15 | 0.635420      | 0.812281  | 8                  |
| 16 | 0.646723      | 0.780072  | 6                  |
| 17 | 0.659077      | 0.781489  | 4                  |
| 18 | 0.659077      | 0.781489  | 4                  |

## 4.2 Plots

```
[35]: plt.plot(df_without_standardization['Correlation threshold'],
             df_without_standardization['Training data R^2 score'], label = "Training
             data R^2 score", marker='v')
plt.plot(df_without_standardization['Correlation threshold'],
             df_without_standardization['Test data R^2 score'], label = "Test data R^2
             score", marker='D')
plt.legend()
plt.xlabel('Correlation threshold')
plt.ylabel('R^2 score')
plt.ylim([0, 1])
plt.show()
```

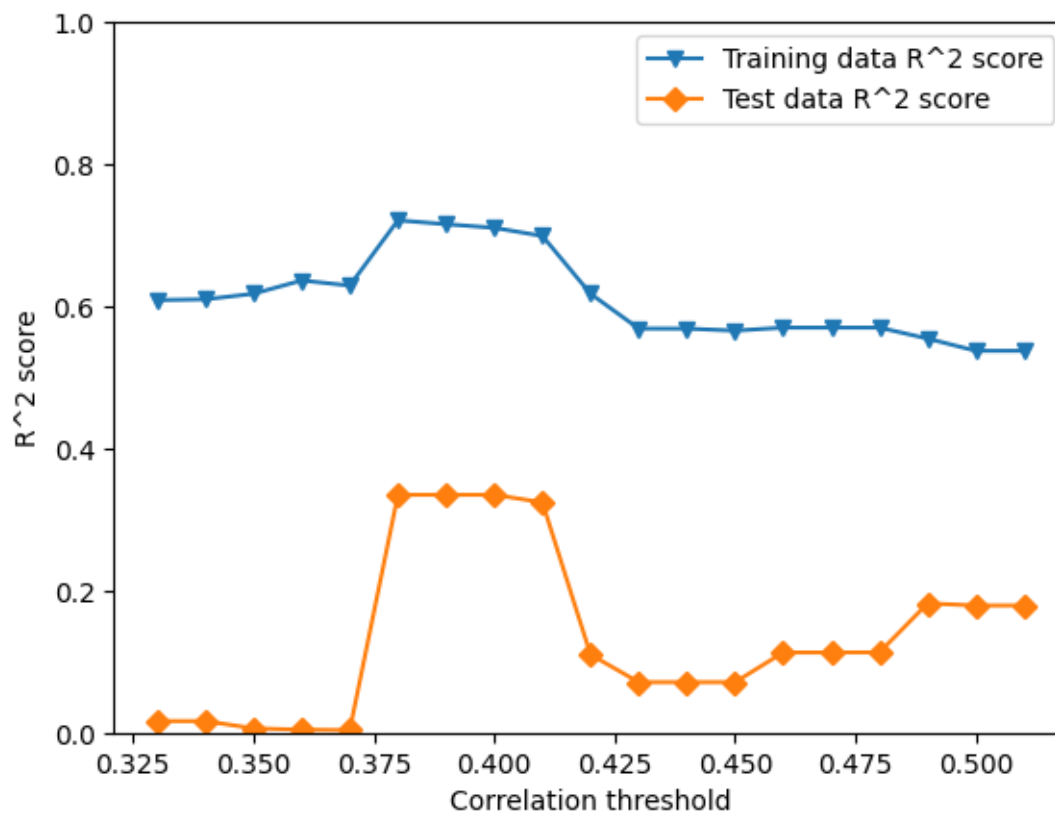

```
[36]: plt.plot(df_without_standardization['Correlation threshold'],
             df_without_standardization['Number of features'], label = "Number of
             features", marker='.')
plt.legend()
plt.xlabel('Correlation threshold')
plt.ylabel('Number of features')
plt.show()
```





[ ]:

## 5 Support Vector Machines (SVM)

```
[37]: without_standardization, train_r2_, test_r2_, hist1, hist2, target_column_name,
      ↪ training_data_RMSE, test_data_RMSE = pred_model.
      ↪ prepare_data_and_create_model(molecular_descriptors_df=data,
      ↪
      ↪         correlation_threshold=0.50,
      ↪
      ↪         standardization=False,
      ↪
      ↪         model_type='SVR',
      ↪
      ↪         kernel_ = 'linear',
      ↪
      ↪         gamma_ = 'auto',
      ↪
      ↪         target_column_name = target,
```

```

↪          random_state=random_state,
↪          train_test_split_=True,
↪          verbose=True)

```

I am not doing standardization...

|   | molecular descriptor name |  |
|---|---------------------------|--|
| 0 | AATSOZ                    |  |
| 1 | AATSOare                  |  |
| 2 | AATSOd                    |  |
| 3 | AATSOdv                   |  |
| 4 | AATSOi                    |  |

  

|   | molecular descriptor name | corr_value |
|---|---------------------------|------------|
| 0 | AATSOZ                    | -0.038502  |
| 1 | AATSOare                  | -0.120847  |
| 2 | AATSOd                    | 0.041648   |
| 3 | AATSOdv                   | -0.115899  |
| 4 | AATSOi                    | 0.191765   |

  

|   | molecular descriptor name | corr_value | absolute correlation value |
|---|---------------------------|------------|----------------------------|
| 0 | AATSOZ                    | -0.038502  | 0.038502                   |
| 1 | AATSOare                  | -0.120847  | 0.120847                   |
| 2 | AATSOd                    | 0.041648   | 0.041648                   |
| 3 | AATSOdv                   | -0.115899  | 0.115899                   |
| 4 | AATSOi                    | 0.191765   | 0.191765                   |

  

|      | molecular descriptor name | corr_value | absolute correlation value |
|------|---------------------------|------------|----------------------------|
| 226  | AMID_0                    | -0.520578  | 0.520578                   |
| 505  | EState_VSA5               | -0.578904  | 0.578904                   |
| 506  | EState_VSA6               | 0.519794   | 0.519794                   |
| 791  | MDEO-12                   | -0.525441  | 0.525441                   |
| 1211 | MCF-7                     | 1.000000   | 1.000000                   |

  

|     | molecular descriptor name | corr_value | absolute correlation value |
|-----|---------------------------|------------|----------------------------|
| 226 | AMID_0                    | -0.520578  | 0.520578                   |
| 505 | EState_VSA5               | -0.578904  | 0.578904                   |
| 506 | EState_VSA6               | 0.519794   | 0.519794                   |
| 791 | MDEO-12                   | -0.525441  | 0.525441                   |

The model used is: SVR...

Return the coefficient of determination of the prediction:

0.4743557839935354

R<sup>2</sup> score: 0.5020352037550295

Correlation coefficient: 0.7085444260983425

Test data - unseen during training:

R<sup>2</sup> score: 0.4743557839935354

Correlation coefficient: 0.6887349156195984

[7.96654481 6.82669237 7.83448445 7.03699901 7.89478809 7.40737585  
7.67935617 8.33257718 7.17327682 8.0339569 8.08511125 8.38190303

```
8.04334248 7.80748886 7.5192305 6.8313205 7.68209688 6.85506111]
113      8.022276
35       6.066513
101      6.920819
36       6.108463
100      7.376751
13       7.987163
0        7.987163
114      7.823909
104      8.397940
96       7.920819
40       8.091515
103      8.376751
48       7.886057
39       8.455932
14       8.086186
117      5.920819
21       8.113509
9        6.143150
```

Name: MCF-7, dtype: float64

Training Root Mean Square Error: 0.6837518281038438

Testing Root Mean Square Error: 0.625265232017053

```
[38]: print(target_column_name+str('_transformed'))
      print(hist1[target_column_name].hist())
```

MCF-7\_transformed

AxesSubplot(0.125,0.11;0.775x0.77)



```
[39]: with_standardization, train_r2_, test_r2_, hist1, hist2, target_column_name,
      ↪ training_data_RMSE, test_data_RMSE = pred_model.
      ↪ prepare_data_and_create_model(molecular_descriptors_df=data,
      ↪
      ↪         correlation_threshold=0.50,
      ↪
      ↪         standardization=True,
      ↪
      ↪         model_type='SVR',
      ↪
      ↪         kernel_ = 'linear',
      ↪
      ↪         gamma_ = 'auto',
      ↪
      ↪         target_column_name = target,
      ↪
      ↪         random_state=random_state,
      ↪
      ↪         train_test_split_=True,
      ↪
      ↪         verbose=True)
```

I am doing standardization...

molecular descriptor name

|   |          |
|---|----------|
| 0 | AATSOZ   |
| 1 | AATSOare |
| 2 | AATSOd   |
| 3 | AATSOdv  |
| 4 | AATSOi   |

|   | molecular descriptor name | corr_value |
|---|---------------------------|------------|
| 0 | AATSOZ                    | -0.038502  |
| 1 | AATSOare                  | -0.120847  |
| 2 | AATSOd                    | 0.041648   |
| 3 | AATSOdv                   | -0.115899  |
| 4 | AATSOi                    | 0.191765   |

|   | molecular descriptor name | corr_value | absolute correlation value |
|---|---------------------------|------------|----------------------------|
| 0 | AATSOZ                    | -0.038502  | 0.038502                   |
| 1 | AATSOare                  | -0.120847  | 0.120847                   |
| 2 | AATSOd                    | 0.041648   | 0.041648                   |
| 3 | AATSOdv                   | -0.115899  | 0.115899                   |
| 4 | AATSOi                    | 0.191765   | 0.191765                   |

|      | molecular descriptor name | corr_value | absolute correlation value |
|------|---------------------------|------------|----------------------------|
| 226  | AMID_0                    | -0.520578  | 0.520578                   |
| 505  | EState_VSA5               | -0.578904  | 0.578904                   |
| 506  | EState_VSA6               | 0.519794   | 0.519794                   |
| 791  | MDEO-12                   | -0.525441  | 0.525441                   |
| 1211 | MCF-7                     | 1.000000   | 1.000000                   |

|     | molecular descriptor name | corr_value | absolute correlation value |
|-----|---------------------------|------------|----------------------------|
| 226 | AMID_0                    | -0.520578  | 0.520578                   |
| 505 | EState_VSA5               | -0.578904  | 0.578904                   |
| 506 | EState_VSA6               | 0.519794   | 0.519794                   |
| 791 | MDEO-12                   | -0.525441  | 0.525441                   |

The model used is: SVR...

Return the coefficient of determination of the prediction:

0.4743557839935354

R<sup>2</sup> score: 0.5020352037550295

Correlation coefficient: 0.7085444260983425

Test data - unseen during training:

R<sup>2</sup> score: 0.4743557839935354

Correlation coefficient: 0.6887349156195984

[7.96654481 6.82669237 7.83448445 7.03699901 7.89478809 7.40737585

7.67935617 8.33257718 7.17327682 8.0339569 8.08511125 8.38190303

8.04334248 7.80748886 7.5192305 6.8313205 7.68209688 6.85506111]

113 8.022276

35 6.066513

101 6.920819

36 6.108463

100 7.376751

13 7.987163

0 7.987163

```

114      7.823909
104      8.397940
96       7.920819
40       8.091515
103      8.376751
48       7.886057
39       8.455932
14       8.086186
117      5.920819
21       8.113509
9        6.143150
Name: MCF-7, dtype: float64
Training Root Mean Square Error: 0.6837518281038438
Testing Root Mean Square Error: 0.625265232017053

```

## 5.1 Search inside correlation space

```

[40]: step = 0.01
      initial_step = corr_low
      last_step = corr_high
      first_list = [x / 100.0 for x in range(int(initial_step*100),
      ↪int(last_step*100), int(step*100))]
      second_list = []
      third_list = []
      fourth_l = []
      fifth_l = []
      f_list = []
      for i in first_list:
          without_standardization, train_r2, test_r2, _, h_, target_column_name,
          ↪training_data_RMSE, test_data_RMSE = pred_model.
          ↪prepare_data_and_create_model(molecular_descriptors_df = data,

          ↪
          correlation_threshold = i,

          ↪
          standardization = False,

          ↪
          model_type = 'SVR',

          ↪
          kernel_ = 'linear',

          ↪
          gamma_ = 'auto',

          ↪
          target_column_name = target,

          ↪
          random_state=random_state,

          ↪
          train_test_split_ = True,

```

```

    verbose = False)
    second_list.append(train_r2)
    third_list.append(test_r2)
    fourth_l.append(training_data_RMSE)
    fifth_l.append(test_data_RMSE)
    f_list.append(len(h_))

```

```

[41]: df_without_standardization = pd.DataFrame(data=first_list,
    ↪columns=["Correlation threshold"])
df_without_standardization['Training data R^2 score'] = second_list
df_without_standardization['Test data R^2 score'] = third_list
df_without_standardization['Training RMSE'] = fourth_l
df_without_standardization['Test RMSE'] = fifth_l
df_without_standardization['Number of features'] = f_list

```

```

[42]: df_svm = df_without_standardization.copy()
df_without_standardization

```

```

[42]:
Correlation threshold  Training data R^2 score  Test data R^2 score  \
0                    0.33                    0.784206            0.012930
1                    0.34                    0.784504            0.010467
2                    0.35                    0.761037           -0.176505
3                    0.36                    0.670546           -0.039968
4                    0.37                    0.668193            0.031631
5                    0.38                    0.647471            0.228751
6                    0.39                    0.629387            0.190286
7                    0.40                    0.632083            0.125215
8                    0.41                    0.614130            0.264660
9                    0.42                    0.594259            0.327494
10                   0.43                    0.580193            0.251954
11                   0.44                    0.579996            0.250150
12                   0.45                    0.580285            0.265700
13                   0.46                    0.540404            0.379934
14                   0.47                    0.540529            0.380586
15                   0.48                    0.528432            0.529576
16                   0.49                    0.525676            0.522684
17                   0.50                    0.502035            0.474356
18                   0.51                    0.502035            0.474356

```

```

Training RMSE  Test RMSE  Number of features
0      0.450111    0.856825                84
1      0.449799    0.857894                74
2      0.473658    0.935439                61
3      0.556156    0.879485                50
4      0.558139    0.848670                43
5      0.575303    0.757383                37

```

|    |          |          |    |
|----|----------|----------|----|
| 6  | 0.589874 | 0.776040 | 29 |
| 7  | 0.587725 | 0.806620 | 26 |
| 8  | 0.601893 | 0.739541 | 25 |
| 9  | 0.617197 | 0.707240 | 19 |
| 10 | 0.627804 | 0.745903 | 14 |
| 11 | 0.627951 | 0.746802 | 13 |
| 12 | 0.627735 | 0.739018 | 11 |
| 13 | 0.656882 | 0.679106 | 10 |
| 14 | 0.656793 | 0.678748 | 9  |
| 15 | 0.665383 | 0.591511 | 8  |
| 16 | 0.667324 | 0.595829 | 6  |
| 17 | 0.683752 | 0.625265 | 4  |
| 18 | 0.683752 | 0.625265 | 4  |

## 5.2 Plots

```
[43]: plt.plot(df_without_standardization['Correlation threshold'],
             df_without_standardization['Training data R^2 score'], label = "Training
             data R^2 score", marker='v')
plt.plot(df_without_standardization['Correlation threshold'],
             df_without_standardization['Test data R^2 score'], label = "Test data R^2
             score", marker='D')
plt.legend()
plt.xlabel('Correlation threshold')
plt.ylabel('R^2 score')
plt.ylim([0, 1])
plt.show()
```



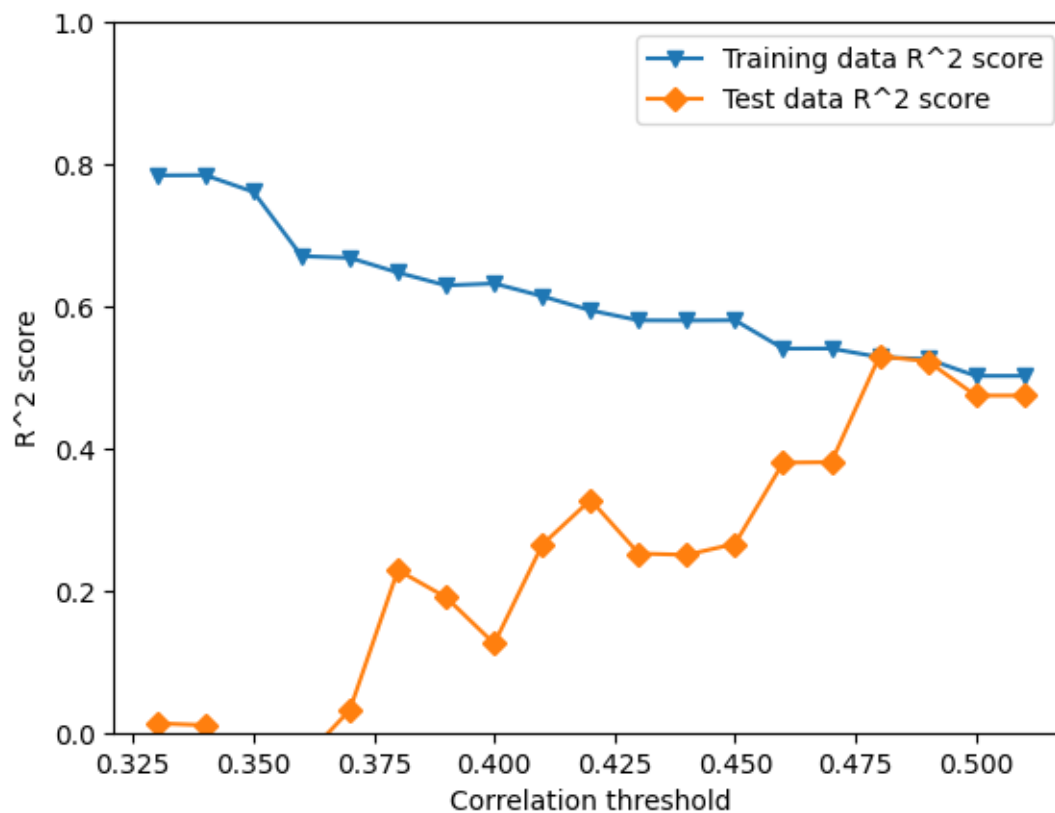

```
[44]: plt.plot(df_without_standardization['Correlation threshold'],  
            df_without_standardization['Number of features'], label = "Number of  
            features", marker='.')  
plt.legend()  
plt.xlabel('Correlation threshold')  
plt.ylabel('Number of features')  
plt.show()
```



### 5.3 Store quality measurements

```
[45]: with pd.ExcelWriter('../Data/Quality_'+str(target)+'_'+str(random_state)+'_'.  
      ↪ 'xlsx') as writer:  
      df_linear.to_excel(writer, sheet_name='MLR')  
      df_decision_tree.to_excel(writer, sheet_name='DT')  
      df_random_forest.to_excel(writer, sheet_name='RF')  
      df_k_nearest.to_excel(writer, sheet_name='KNN')  
      df_svm.to_excel(writer, sheet_name='SVM')
```

# Notebook

December 19, 2023

## 1 File 28

```
[1]: import sys
from pathlib import Path
prediction_mode_path = Path("../module")
sys.path.append(prediction_mode_path.as_posix())
import models_creation as pred_model

import pandas as pd
import numpy as np

from sklearn.metrics import r2_score

import matplotlib.pyplot as plt
from sklearn.tree import plot_tree

from matplotlib import pyplot as plt

import joblib

import warnings
warnings.filterwarnings('ignore')
```

```
[2]: load_prepared_data = pd.read_excel('../Data/Kolchicyna_machine_learning.xlsx')
load_prepared_data = load_prepared_data.drop(columns=['Unnamed: 0'])

target = 'MCF-7'

corr_low = 0.33
corr_high = 0.525

random_state = 28
```

```
[3]: load_prepared_data.head()
```

```
[3]:
```

|   | AATSOZ    | AATSOare | AATSOd   | AATSOdv  | AATSOi     | AATSOm    | AATSOp   | \ |
|---|-----------|----------|----------|----------|------------|-----------|----------|---|
| 0 | 25.090909 | 6.046518 | 3.109091 | 6.662626 | 160.775045 | 99.075564 | 1.555512 |   |
| 1 | 24.448276 | 6.008422 | 3.051724 | 6.386973 | 161.021674 | 96.473315 | 1.538471 |   |

|   |           |          |          |          |            |           |          |
|---|-----------|----------|----------|----------|------------|-----------|----------|
| 2 | 23.868852 | 5.974074 | 3.000000 | 6.138434 | 161.244045 | 94.127025 | 1.523105 |
| 3 | 23.868852 | 5.974074 | 3.032787 | 6.171220 | 161.244045 | 94.127025 | 1.523105 |
| 4 | 23.343750 | 5.942945 | 2.953125 | 5.913194 | 161.445569 | 92.000700 | 1.509180 |

|   | AATS0pe  | AATS0s   | AATS0se  | ... | A549_float | MCF-7_float | LoVo_float | \ |
|---|----------|----------|----------|-----|------------|-------------|------------|---|
| 0 | 6.126680 | 3.435416 | 7.629859 | ... | 10.8       | 10.3        | 6.5        |   |
| 1 | 6.088791 | 3.330998 | 7.596891 | ... | 11.6       | 12.0        | 8.5        |   |
| 2 | 6.054630 | 3.236850 | 7.567166 | ... | 10.9       | 12.2        | 8.8        |   |
| 3 | 6.054630 | 3.257798 | 7.567166 | ... | 10.5       | 11.3        | 8.5        |   |
| 4 | 6.023670 | 3.151529 | 7.540228 | ... | 89.5       | 92.7        | 52.8       |   |

|   | LoVo/DX_float | BALB/3T3_float | A549_float_transformed | \ |
|---|---------------|----------------|------------------------|---|
| 0 | 54.9          | 10.2           | 7.966576               |   |
| 1 | 31.1          | 14.3           | 7.935542               |   |
| 2 | 17.9          | 11.7           | 7.962574               |   |
| 3 | 10.2          | 11.0           | 7.978811               |   |
| 4 | 77.8          | 99.4           | 7.048177               |   |

|   | MCF-7_float_transformed | LoVo_float_transformed | LoVo/DX_float_transformed | \ |
|---|-------------------------|------------------------|---------------------------|---|
| 0 | 7.987163                | 8.187087               | 7.260428                  |   |
| 1 | 7.920819                | 8.070581               | 7.507240                  |   |
| 2 | 7.913640                | 8.055517               | 7.747147                  |   |
| 3 | 7.946922                | 8.070581               | 7.991400                  |   |
| 4 | 7.032920                | 7.277366               | 7.109020                  |   |

|   | BALB/3T3_float_transformed |
|---|----------------------------|
| 0 | 7.991400                   |
| 1 | 7.844664                   |
| 2 | 7.931814                   |
| 3 | 7.958607                   |
| 4 | 7.002614                   |

[5 rows x 1221 columns]

```
[4]: data = load_prepared_data[list(load_prepared_data.columns)[0:-10]]
data[target] = load_prepared_data[load_prepared_data.columns[-4]]
data.head()
```

|   | AATS0Z    | AATS0are | AATS0d   | AATS0dv  | AATS0i     | AATS0m    | AATS0p   | \ |
|---|-----------|----------|----------|----------|------------|-----------|----------|---|
| 0 | 25.090909 | 6.046518 | 3.109091 | 6.662626 | 160.775045 | 99.075564 | 1.555512 |   |
| 1 | 24.448276 | 6.008422 | 3.051724 | 6.386973 | 161.021674 | 96.473315 | 1.538471 |   |
| 2 | 23.868852 | 5.974074 | 3.000000 | 6.138434 | 161.244045 | 94.127025 | 1.523105 |   |
| 3 | 23.868852 | 5.974074 | 3.032787 | 6.171220 | 161.244045 | 94.127025 | 1.523105 |   |
| 4 | 23.343750 | 5.942945 | 2.953125 | 5.913194 | 161.445569 | 92.000700 | 1.509180 |   |

|   | AATS0pe  | AATS0s   | AATS0se  | ... | piPC10   | piPC2    | piPC3    | piPC4    | \ |
|---|----------|----------|----------|-----|----------|----------|----------|----------|---|
| 0 | 6.126680 | 3.435416 | 7.629859 | ... | 7.999655 | 4.266195 | 4.915408 | 5.516700 |   |

|   |          |          |          |     |          |          |          |          |
|---|----------|----------|----------|-----|----------|----------|----------|----------|
| 1 | 6.088791 | 3.330998 | 7.596891 | ... | 8.018726 | 4.280132 | 4.922714 | 5.520711 |
| 2 | 6.054630 | 3.236850 | 7.567166 | ... | 8.028799 | 4.293878 | 4.929967 | 5.524706 |
| 3 | 6.054630 | 3.257798 | 7.567166 | ... | 8.037440 | 4.307438 | 4.929967 | 5.524706 |
| 4 | 6.023670 | 3.151529 | 7.540228 | ... | 8.034892 | 4.307438 | 4.937168 | 5.528685 |

|   | piPC5    | piPC6    | piPC7    | piPC8    | piPC9    | MCF-7    |
|---|----------|----------|----------|----------|----------|----------|
| 0 | 6.098566 | 6.595759 | 6.979116 | 7.337313 | 7.681445 | 7.987163 |
| 1 | 6.103048 | 6.601209 | 6.985613 | 7.349442 | 7.695531 | 7.920819 |
| 2 | 6.105281 | 6.603923 | 6.989306 | 7.353932 | 7.704023 | 7.913640 |
| 3 | 6.107510 | 6.606629 | 6.992068 | 7.361425 | 7.709420 | 7.946922 |
| 4 | 6.107510 | 6.605277 | 6.991148 | 7.356489 | 7.707175 | 7.032920 |

[5 rows x 1212 columns]

## 2 Multiple Linear regression (MLR)

```
[5]: without_standardization, train_r2_, test_r2_, hist1, hist2, target_column_name,
      ↪ training_data_RMSE, test_data_RMSE = pred_model.
      ↪ prepare_data_and_create_model(molecular_descriptors_df=data,
      ↪
      ↪ correlation_threshold=0.5,
      ↪
      ↪ standardization=False,
      ↪
      ↪ model_type='linear_model',
      ↪
      ↪ target_column_name = str(target),
      ↪
      ↪ random_state=random_state,
      ↪
      ↪ train_test_split_=True,
      ↪
      ↪ verbose=True)
```

I am not doing standardization...

|   | molecular descriptor name |            |
|---|---------------------------|------------|
| 0 | AATS0Z                    |            |
| 1 | AATS0are                  |            |
| 2 | AATS0d                    |            |
| 3 | AATS0dv                   |            |
| 4 | AATS0i                    |            |
|   | molecular descriptor name | corr_value |
| 0 | AATS0Z                    | -0.038502  |
| 1 | AATS0are                  | -0.120847  |
| 2 | AATS0d                    | 0.041648   |
| 3 | AATS0dv                   | -0.115899  |

|   |                           |            |                            |
|---|---------------------------|------------|----------------------------|
| 4 | AATSOi                    | 0.191765   |                            |
|   | molecular descriptor name | corr_value | absolute correlation value |
| 0 | AATSOZ                    | -0.038502  | 0.038502                   |
| 1 | AATSOare                  | -0.120847  | 0.120847                   |
| 2 | AATSOd                    | 0.041648   | 0.041648                   |
| 3 | AATSOdv                   | -0.115899  | 0.115899                   |
| 4 | AATSOi                    | 0.191765   | 0.191765                   |

  

|      |                           |            |                            |
|------|---------------------------|------------|----------------------------|
|      | molecular descriptor name | corr_value | absolute correlation value |
| 226  | AMID_0                    | -0.520578  | 0.520578                   |
| 505  | EState_VSA5               | -0.578904  | 0.578904                   |
| 506  | EState_VSA6               | 0.519794   | 0.519794                   |
| 791  | MDEO-12                   | -0.525441  | 0.525441                   |
| 1211 | MCF-7                     | 1.000000   | 1.000000                   |

  

|     |                           |            |                            |
|-----|---------------------------|------------|----------------------------|
|     | molecular descriptor name | corr_value | absolute correlation value |
| 226 | AMID_0                    | -0.520578  | 0.520578                   |
| 505 | EState_VSA5               | -0.578904  | 0.578904                   |
| 506 | EState_VSA6               | 0.519794   | 0.519794                   |
| 791 | MDEO-12                   | -0.525441  | 0.525441                   |

The model used is: LinearReg..

Return the coefficient of determination of the prediction:  
0.5009760847434094

R<sup>2</sup> score: 0.5283510681142922

Correlation coefficient: 0.7268776156371114

Test data - unseen during training:  
R<sup>2</sup> score: 0.5009760847434094

Correlation coefficient: 0.707796640811052

[8.00252575 6.60183757 7.65912481 6.88611169 7.8702033 7.23304372  
7.57064419 8.42411387 7.0697769 7.89024083 7.95174669 8.38076499  
7.96632403 7.61854434 7.3479345 6.45607766 7.72287088 6.79263447]

113 8.022276  
35 6.066513  
101 6.920819  
36 6.108463  
100 7.376751  
13 7.987163  
0 7.987163  
114 7.823909  
104 8.397940  
96 7.920819  
40 8.091515  
103 8.376751  
48 7.886057  
39 8.455932  
14 8.086186  
117 5.920819  
21 8.113509  
9 6.143150

Name: MCF-7, dtype: float64

Training Root Mean Square Error: 0.6654395471577522

Testing Root Mean Square Error: 0.6092268213393355

```
[6]: print(target_column_name+str('_transformed'))  
     print(hist1[target_column_name].hist())
```

MCF-7\_transformed

AxesSubplot(0.125,0.11;0.775x0.77)



```
[7]: with_standardization, train_r2_, test_r2_, hist1, hist2, target_column_name,   
     ↪ training_data_RMSE, test_data_RMSE = pred_model.  
     ↪ prepare_data_and_create_model(molecular_descriptors_df=data,  
  
     ↪             correlation_threshold=0.50,  
  
     ↪             standardization=True,  
  
     ↪             model_type='linear_model',  
  
     ↪             target_column_name = target,  
  
     ↪             random_state=random_state,
```

```

↪          train_test_split_=True,
↪          verbose=True)

```

I am doing standardization...

```

molecular descriptor name
0          AATSOZ
1          AATSOare
2          AATSOd
3          AATSOdv
4          AATSOi
molecular descriptor name  corr_value
0          AATSOZ      -0.038502
1          AATSOare    -0.120847
2          AATSOd       0.041648
3          AATSOdv     -0.115899
4          AATSOi       0.191765
molecular descriptor name  corr_value  absolute correlation value
0          AATSOZ      -0.038502          0.038502
1          AATSOare    -0.120847          0.120847
2          AATSOd       0.041648          0.041648
3          AATSOdv     -0.115899          0.115899
4          AATSOi       0.191765          0.191765
molecular descriptor name  corr_value  absolute correlation value
226          AMID_0      -0.520578          0.520578
505          EState_VSA5 -0.578904          0.578904
506          EState_VSA6  0.519794          0.519794
791          MDEO-12     -0.525441          0.525441
1211         MCF-7       1.000000          1.000000
molecular descriptor name  corr_value  absolute correlation value
226          AMID_0      -0.520578          0.520578
505          EState_VSA5 -0.578904          0.578904
506          EState_VSA6  0.519794          0.519794
791          MDEO-12     -0.525441          0.525441
The model used is: LinearReg..
Return the coefficient of determination of the prediction:
0.5009760847434094
R^2 score: 0.5283510681142922
Correlation coefficient: 0.7268776156371114
Test data - unseen during training:
R^2 score: 0.5009760847434094
Correlation coefficient: 0.707796640811052
[8.00252575 6.60183757 7.65912481 6.88611169 7.8702033 7.23304372
 7.57064419 8.42411387 7.0697769 7.89024083 7.95174669 8.38076499
 7.96632403 7.61854434 7.3479345 6.45607766 7.72287088 6.79263447]
113      8.022276
35       6.066513

```



```

101    6.920819
36    6.108463
100    7.376751
13    7.987163
0    7.987163
114    7.823909
104    8.397940
96    7.920819
40    8.091515
103    8.376751
48    7.886057
39    8.455932
14    8.086186
117    5.920819
21    8.113509
9    6.143150

```

Name: MCF-7, dtype: float64

Training Root Mean Square Error: 0.6654395471577522

Testing Root Mean Square Error: 0.6092268213393355

## 2.1 Search inside correlation space

```

[8]: step = 0.01
initial_step = corr_low
last_step = corr_high
first_list = [x / 100.0 for x in range(int(initial_step*100),
    ↪int(last_step*100), int(step*100))]
second_list = []
third_list = []
fourth_l = []
fifth_l = []
f_list = []
for i in first_list:
    without_standardization, train_r2, test_r2, _, h_, target_column_name,
    ↪training_data_RMSE, test_data_RMSE = pred_model.
    ↪prepare_data_and_create_model(molecular_descriptors_df = data,

    ↪                                correlation_threshold = i,

    ↪                                standardization = False,

    ↪                                model_type = 'linear_model',

    ↪                                target_column_name = target,

    ↪                                random_state=random_state,

```

```

    train_test_split_ = True,

    verbose = False)
second_list.append(train_r2)
third_list.append(test_r2)
fourth_l.append(training_data_RMSE)
fifth_l.append(test_data_RMSE)
f_list.append(len(h_))

```

```

[9]: df_without_standardization = pd.DataFrame(data=first_list,
    columns=["Correlation threshold"])
df_without_standardization['Training data R^2 score'] = second_list
df_without_standardization['Test data R^2 score'] = third_list
df_without_standardization['Training RMSE'] = fourth_l
df_without_standardization['Test RMSE'] = fifth_l
df_without_standardization['Number of features'] = f_list

```

```

[10]: df_linear = df_without_standardization.copy()
df_without_standardization

```

```

[10]:
Correlation threshold  Training data R^2 score  Test data R^2 score \
0                    0.33                0.983044        -0.320708
1                    0.34                0.963409        -0.189420
2                    0.35                0.919079        -0.503844
3                    0.36                0.893639        -0.336284
4                    0.37                0.843982         0.194976
5                    0.38                0.817407        -0.008212
6                    0.39                0.758880        -0.872243
7                    0.40                0.739958        -1.044879
8                    0.41                0.732273        -0.597421
9                    0.42                0.695477        -0.513998
10                   0.43                0.629188        -0.828754
11                   0.44                0.626877        -0.804570
12                   0.45                0.621663        -0.940585
13                   0.46                0.593073        -0.827574
14                   0.47                0.592212        -0.859618
15                   0.48                0.548178         0.082669
16                   0.49                0.540995         0.051643
17                   0.50                0.528351        -0.166067
18                   0.51                0.528351        -0.166067

Training RMSE  Test RMSE  Number of features
0          0.126172    2.774099             84
1          0.185349    1.549648             74
2          0.275632    0.945715             61
3          0.316002    0.902716             50

```

|    |          |          |    |
|----|----------|----------|----|
| 4  | 0.382724 | 1.044381 | 43 |
| 5  | 0.414038 | 0.838263 | 37 |
| 6  | 0.475791 | 0.909707 | 29 |
| 7  | 0.494107 | 1.012390 | 26 |
| 8  | 0.501355 | 0.862432 | 25 |
| 9  | 0.534698 | 0.805613 | 19 |
| 10 | 0.590032 | 0.826589 | 14 |
| 11 | 0.591868 | 0.826973 | 13 |
| 12 | 0.595990 | 0.817058 | 11 |
| 13 | 0.618098 | 0.783549 | 10 |
| 14 | 0.618752 | 0.793394 | 9  |
| 15 | 0.651302 | 0.576590 | 8  |
| 16 | 0.656459 | 0.574487 | 6  |
| 17 | 0.665440 | 0.609227 | 4  |
| 18 | 0.665440 | 0.609227 | 4  |

```
[ ]:
```

## 2.2 Plots

```
[11]: plt.plot(df_without_standardization['Correlation threshold'],
↳df_without_standardization['Training data R^2 score'], label = "Training_
↳data R^2 score", marker='v')
plt.plot(df_without_standardization['Correlation threshold'],
↳df_without_standardization['Test data R^2 score'], label = "Test data R^2_
↳score", marker='D')
plt.legend()
plt.xlabel('Correlation threshold')
plt.ylabel('R^2 score')
plt.ylim([0, 1])
plt.show()
```

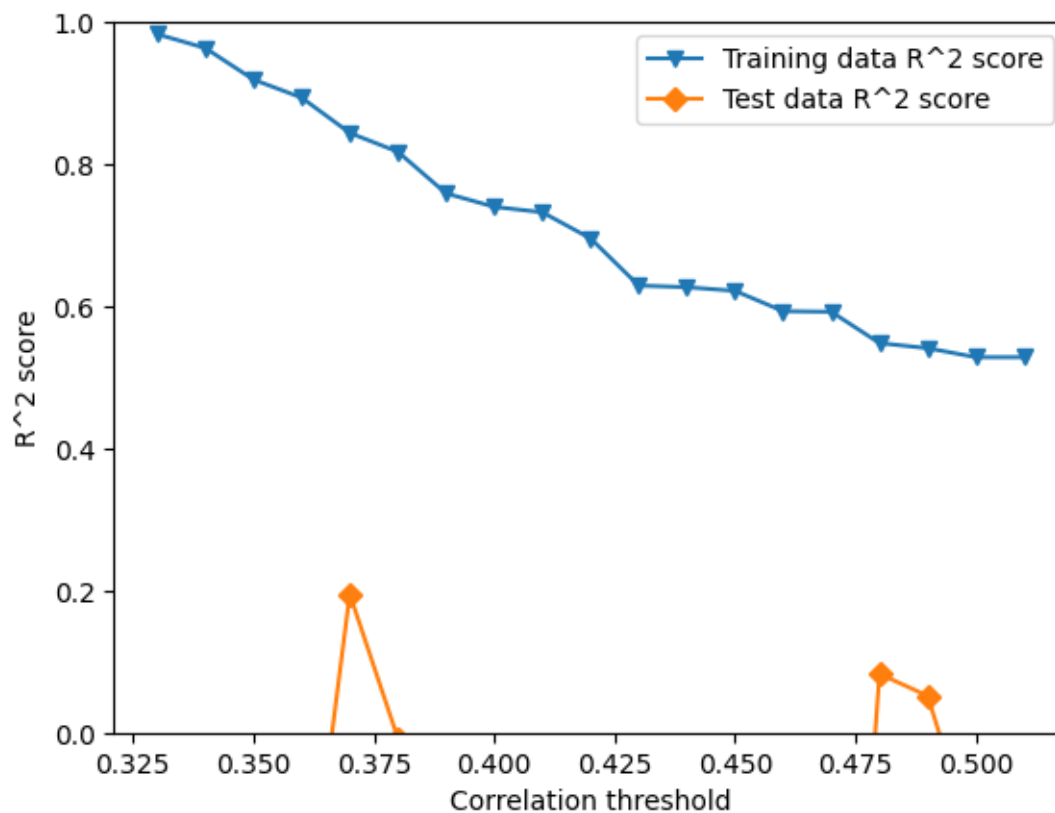

```
[12]: plt.plot(df_without_standardization['Correlation threshold'],
             df_without_standardization['Number of features'], label = "Number of
             features", marker='.')
plt.legend()
plt.xlabel('Correlation threshold')
plt.ylabel('Number of features')
plt.show()
```



[ ]:

## 2.3 Decision Tree

```
[13]: without_standardization, train_r2_, test_r2_, hist1, hist2, target_column_name,
      ↪ training_data_RMSE, test_data_RMSE = pred_model.
      ↪ prepare_data_and_create_model(molecular_descriptors_df=data,
      ↪
      ↪ correlation_threshold=0.50,
      ↪
      ↪ standardization=False,
      ↪
      ↪ model_type='DecisionTreeRegressor',
      ↪
      ↪ max_depth=5,
      ↪
      ↪ target_column_name = target,
      ↪
      ↪ random_state=random_state,
```

```

↪          train_test_split_=True,
↪          verbose=True)

```

I am not doing standardization...

```

molecular descriptor name
0          AATSOZ
1          AATSOare
2          AATSOd
3          AATSOdv
4          AATSOi
molecular descriptor name  corr_value
0          AATSOZ      -0.038502
1          AATSOare    -0.120847
2          AATSOd      0.041648
3          AATSOdv     -0.115899
4          AATSOi      0.191765
molecular descriptor name  corr_value  absolute correlation value
0          AATSOZ      -0.038502          0.038502
1          AATSOare    -0.120847          0.120847
2          AATSOd      0.041648          0.041648
3          AATSOdv     -0.115899          0.115899
4          AATSOi      0.191765          0.191765
molecular descriptor name  corr_value  absolute correlation value
226          AMID_0      -0.520578          0.520578
505          EState_VSA5 -0.578904          0.578904
506          EState_VSA6 0.519794          0.519794
791          MDEO-12     -0.525441          0.525441
1211         MCF-7       1.000000          1.000000
molecular descriptor name  corr_value  absolute correlation value
226          AMID_0      -0.520578          0.520578
505          EState_VSA5 -0.578904          0.578904
506          EState_VSA6 0.519794          0.519794
791          MDEO-12     -0.525441          0.525441
The model used is: DecisionTree...
Return the coefficient of determination of the prediction:
-0.005104855722772195
R^2 score: 0.8657226333752897
Correlation coefficient: 0.9304421708925761
Test data - unseen during training:
R^2 score: -0.005104855722772195
Correlation coefficient: nan
[7.94564921 7.67778071 8.35232643 7.67778071 7.94564921 8.95860731
 7.94564921 7.69458125 7.20277093 7.94564921 7.94564921 7.94564921
 7.94564921 7.94564921 8.95860731 6.02227639 6.99012437 7.20277093]
113      8.022276
35       6.066513

```

```

101    6.920819
36     6.108463
100    7.376751
13     7.987163
0      7.987163
114    7.823909
104    8.397940
96     7.920819
40     8.091515
103    8.376751
48     7.886057
39     8.455932
14     8.086186
117    5.920819
21     8.113509
9      6.143150

```

Name: MCF-7, dtype: float64

Training Root Mean Square Error: 0.35505905070999344

Testing Root Mean Square Error: 0.8646174988464919

```

[14]: print(target_column_name+str('_transformed'))
      print(hist1[target_column_name].hist())

```

MCF-7\_transformed

AxesSubplot(0.125,0.11;0.775x0.77)



```
[15]: with_standardization, train_r2_, test_r2_, hist1, hist2, target_column_name,
      ↪ training_data_RMSE, test_data_RMSE = pred_model.
      ↪ prepare_data_and_create_model(molecular_descriptors_df=data,
      ↪
      ↪         correlation_threshold=0.50,
      ↪
      ↪         standardization=True,
      ↪
      ↪         model_type='DecisionTreeRegressor',
      ↪
      ↪         max_depth=5,
      ↪
      ↪         target_column_name = target,
      ↪
      ↪         random_state=random_state,
      ↪
      ↪         train_test_split_=True,
      ↪
      ↪         verbose=True)
```

I am doing standardization...

|   | molecular descriptor name |  |
|---|---------------------------|--|
| 0 | AATSOZ                    |  |
| 1 | AATSOare                  |  |
| 2 | AATSOd                    |  |
| 3 | AATSOdv                   |  |
| 4 | AATSOi                    |  |

  

|   | molecular descriptor name | corr_value |
|---|---------------------------|------------|
| 0 | AATSOZ                    | -0.038502  |
| 1 | AATSOare                  | -0.120847  |
| 2 | AATSOd                    | 0.041648   |
| 3 | AATSOdv                   | -0.115899  |
| 4 | AATSOi                    | 0.191765   |

  

|   | molecular descriptor name | corr_value | absolute correlation value |
|---|---------------------------|------------|----------------------------|
| 0 | AATSOZ                    | -0.038502  | 0.038502                   |
| 1 | AATSOare                  | -0.120847  | 0.120847                   |
| 2 | AATSOd                    | 0.041648   | 0.041648                   |
| 3 | AATSOdv                   | -0.115899  | 0.115899                   |
| 4 | AATSOi                    | 0.191765   | 0.191765                   |

  

|     | molecular descriptor name | corr_value | absolute correlation value |
|-----|---------------------------|------------|----------------------------|
| 226 | AMID_0                    | -0.520578  | 0.520578                   |
| 505 | EState_VSA5               | -0.578904  | 0.578904                   |
| 506 | EState_VSA6               | 0.519794   | 0.519794                   |
| 791 | MDE0-12                   | -0.525441  | 0.525441                   |



|      |                           |            |                            |
|------|---------------------------|------------|----------------------------|
| 1211 | MCF-7                     | 1.000000   | 1.000000                   |
|      | molecular descriptor name | corr_value | absolute correlation value |
| 226  | AMID_0                    | -0.520578  | 0.520578                   |
| 505  | EState_VSA5               | -0.578904  | 0.578904                   |
| 506  | EState_VSA6               | 0.519794   | 0.519794                   |
| 791  | MDE0-12                   | -0.525441  | 0.525441                   |

The model used is: DecisionTree...

Return the coefficient of determination of the prediction:

-0.005104855722772195

R<sup>2</sup> score: 0.8657226333752897

Correlation coefficient: 0.9304421708925761

Test data - unseen during training:

R<sup>2</sup> score: -0.005104855722772195

Correlation coefficient: nan

[7.94564921 7.67778071 8.35232643 7.67778071 7.94564921 8.95860731  
 7.94564921 7.69458125 7.20277093 7.94564921 7.94564921 7.94564921  
 7.94564921 7.94564921 8.95860731 6.02227639 6.99012437 7.20277093]

113 8.022276

35 6.066513

101 6.920819

36 6.108463

100 7.376751

13 7.987163

0 7.987163

114 7.823909

104 8.397940

96 7.920819

40 8.091515

103 8.376751

48 7.886057

39 8.455932

14 8.086186

117 5.920819

21 8.113509

9 6.143150

Name: MCF-7, dtype: float64

Training Root Mean Square Error: 0.35505905070999344

Testing Root Mean Square Error: 0.8646174988464919

## 2.4 Search inside correlation space

```
[16]: step = 0.01
      initial_step = corr_low
      last_step = corr_high
      first_list = [x / 100.0 for x in range(int(initial_step*100),
      ↪int(last_step*100), int(step*100))]
      max_depth = [range(2, 30, 1)]
```

```

corr_th = []
second_list = []
third_list = []
fourth_l = []
fifth_l = []
f_list = []
fif_list = []
for i in first_list:
    for depth in max_depth[0]:

        without_standardization, train_r2, test_r2, _, h_, target_column_name,
        ↪training_data_RMSE, test_data_RMSE = pred_model.
        ↪prepare_data_and_create_model(molecular_descriptors_df=data,

        ↪
                                correlation_threshold=i,
                                ↪
                                standardization=False,
                                ↪
                                model_type='DecisionTreeRegressor',
                                ↪
                                max_depth=depth,
                                ↪
                                target_column_name = target,
                                ↪
                                random_state=random_state,
                                ↪
                                train_test_split_=True,
                                ↪
                                verbose=False)
        corr_th.append(i)
        second_list.append(train_r2)
        third_list.append(test_r2)
        fourth_l.append(training_data_RMSE)
        fifth_l.append(test_data_RMSE)
        f_list.append(len(h_))
        fif_list.append(depth)

```

```

[17]: df_without_standardization = pd.DataFrame(data=corr_th, columns=["Correlation_
        ↪threshold"])
df_without_standardization['Training data R^2 score'] = second_list
df_without_standardization['Test data R^2 score'] = third_list
df_without_standardization['Training RMSE'] = fourth_l
df_without_standardization['Test RMSE'] = fifth_l
df_without_standardization['Number of features'] = f_list
df_without_standardization['Depth number'] = fif_list

```

```
[18]: df_decision_tree = df_without_standardization.copy()
      #df_without_standardization.to_excel('../Data/
      ↪A549_Decision_tree_rs_'+str(random_state)+'.xlsx')
```

## 2.5 Plots

```
[ ]: corre_list = [x / 100.0 for x in range(int(initial_step*100),
      ↪int(last_step*100), int(0.01*100))]
for element in corre_list:
    element_ =
    ↪df_without_standardization[df_without_standardization['Correlation_
    ↪threshold'] == float(element)]
    plt.plot(element_['Depth number'], element_['Training data R^2 score'],
    ↪label = "Training data R^2 score", marker='v')
    plt.plot(element_['Depth number'], element_['Test data R^2 score'], label =
    ↪"Test data R^2 score", marker='D')
    plt.legend()
    plt.xlabel('Depth number -> correlation threshold: '+str(element)+'.' \n
    ↪Number of features: '+str(element_['Number of features'].iloc[0]),
    ↪fontweight='bold')
    plt.xlim(max(element_['Depth number'])+1, min(element_['Depth number'])-1)
    plt.ylabel('R^2 score')
    plt.ylim([0, 1])
    plt.rc('grid', linestyle="-. ", color='black')
    plt.grid(True)
    plt.show()
```

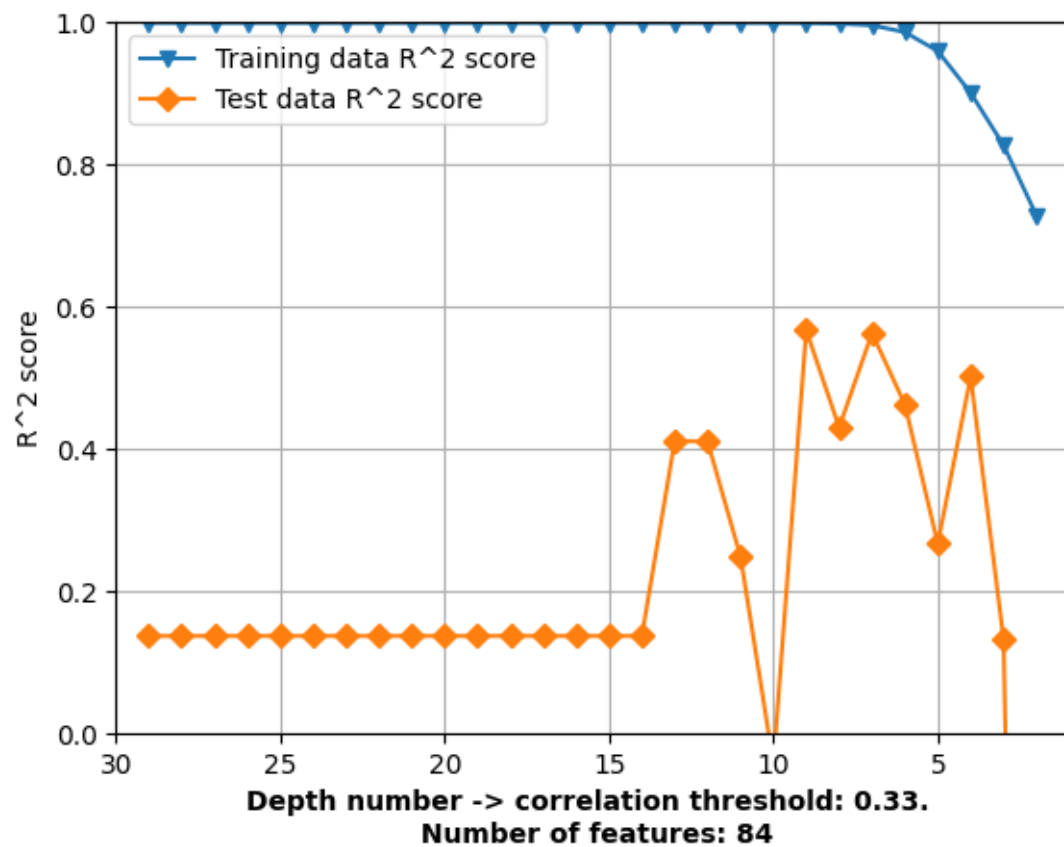

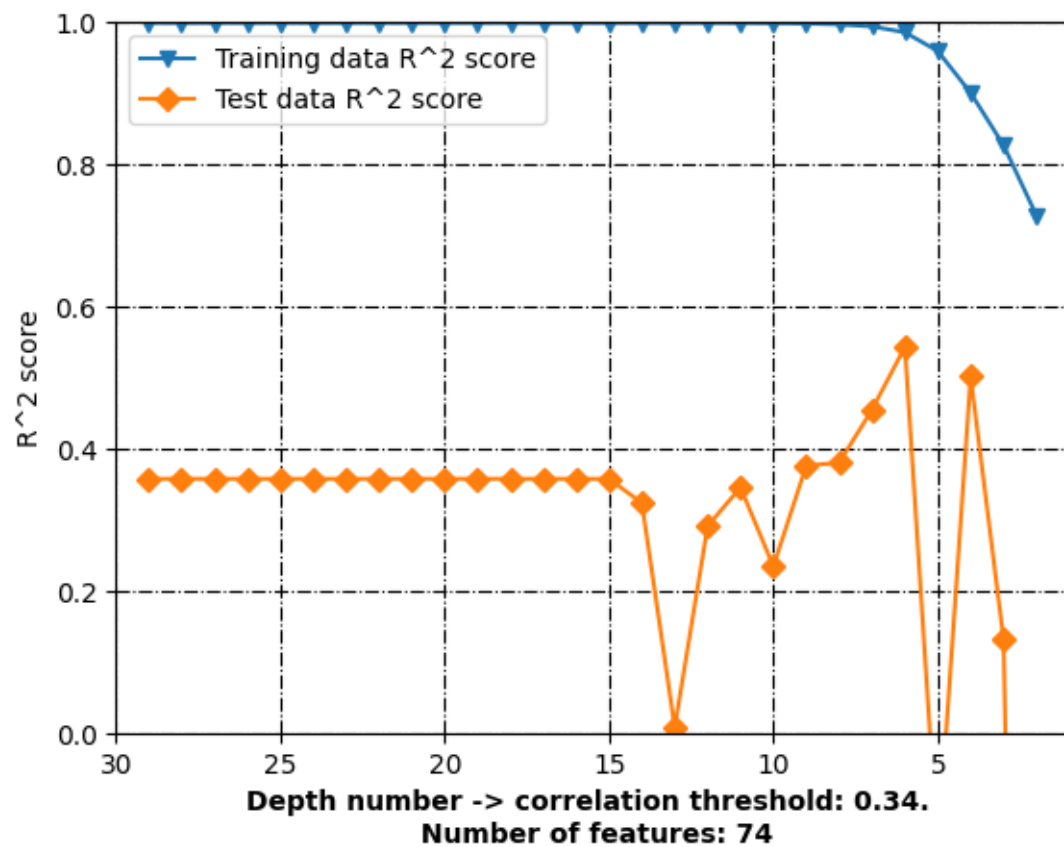

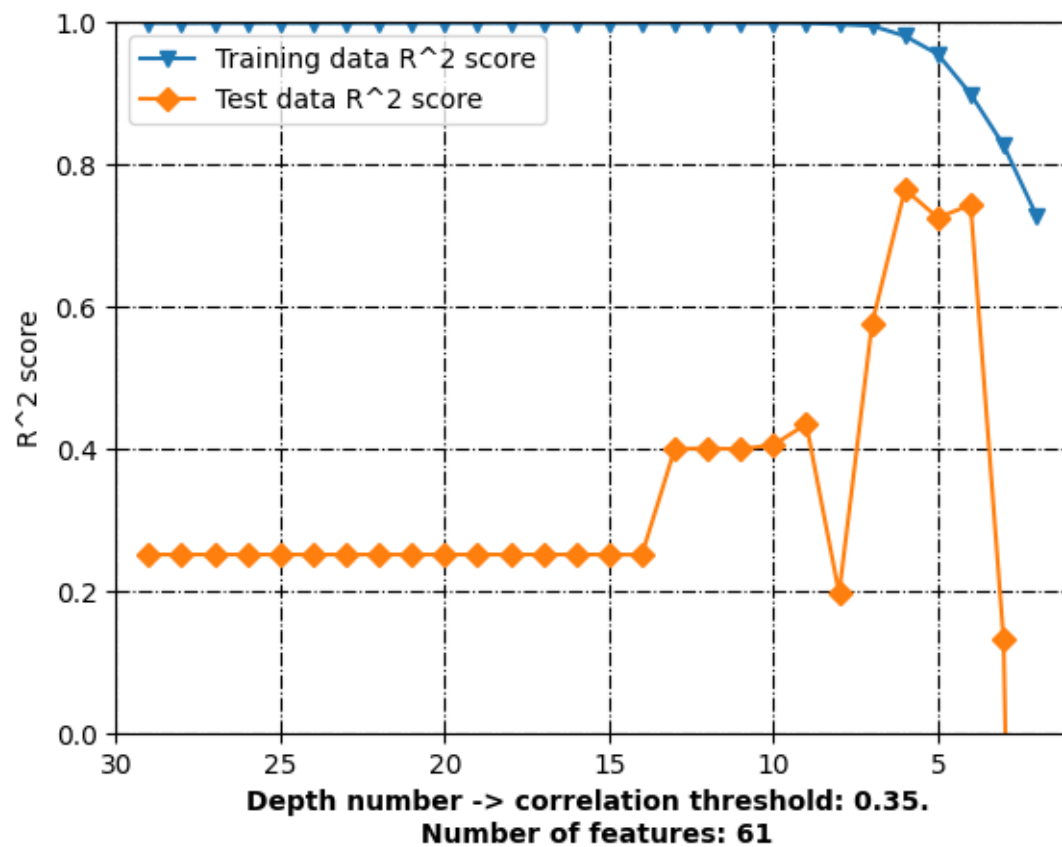

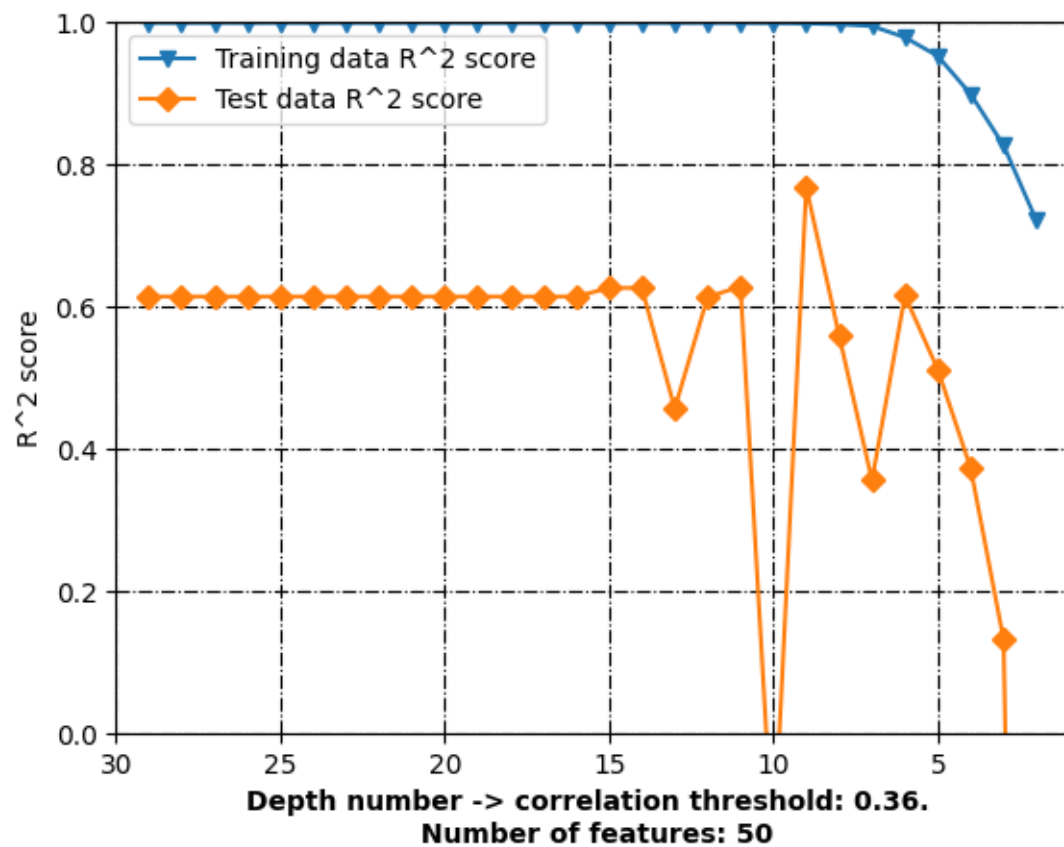

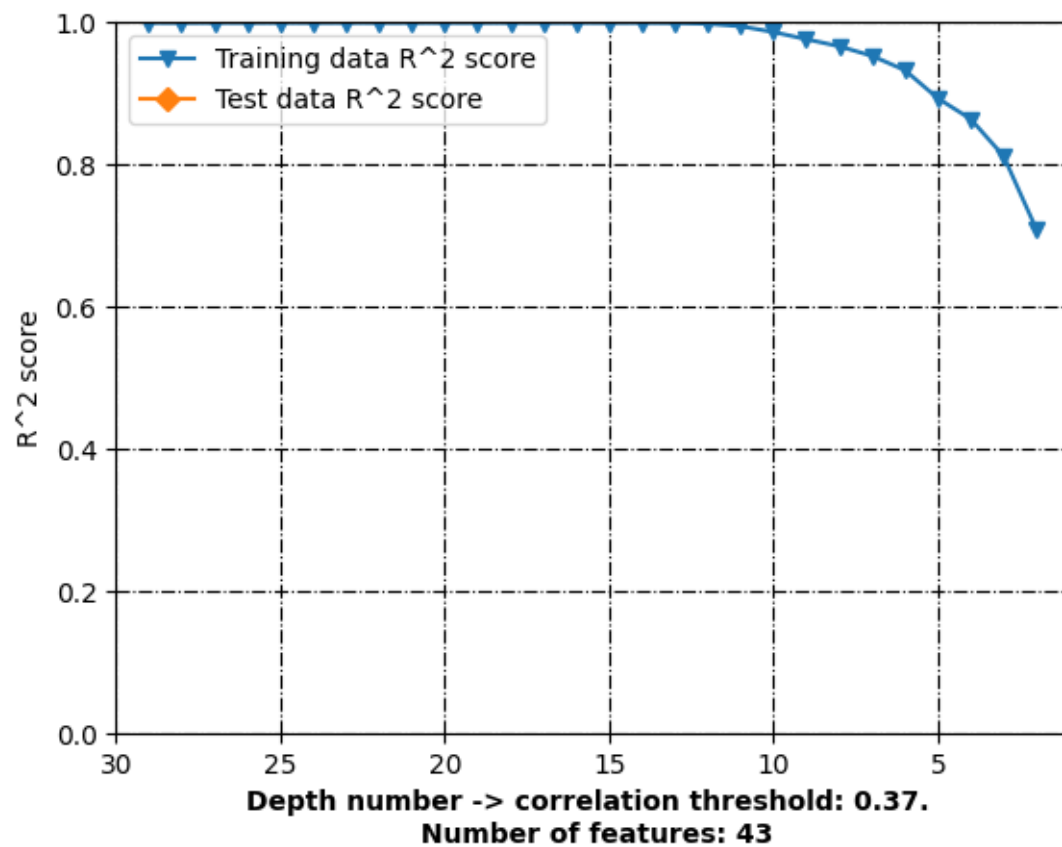



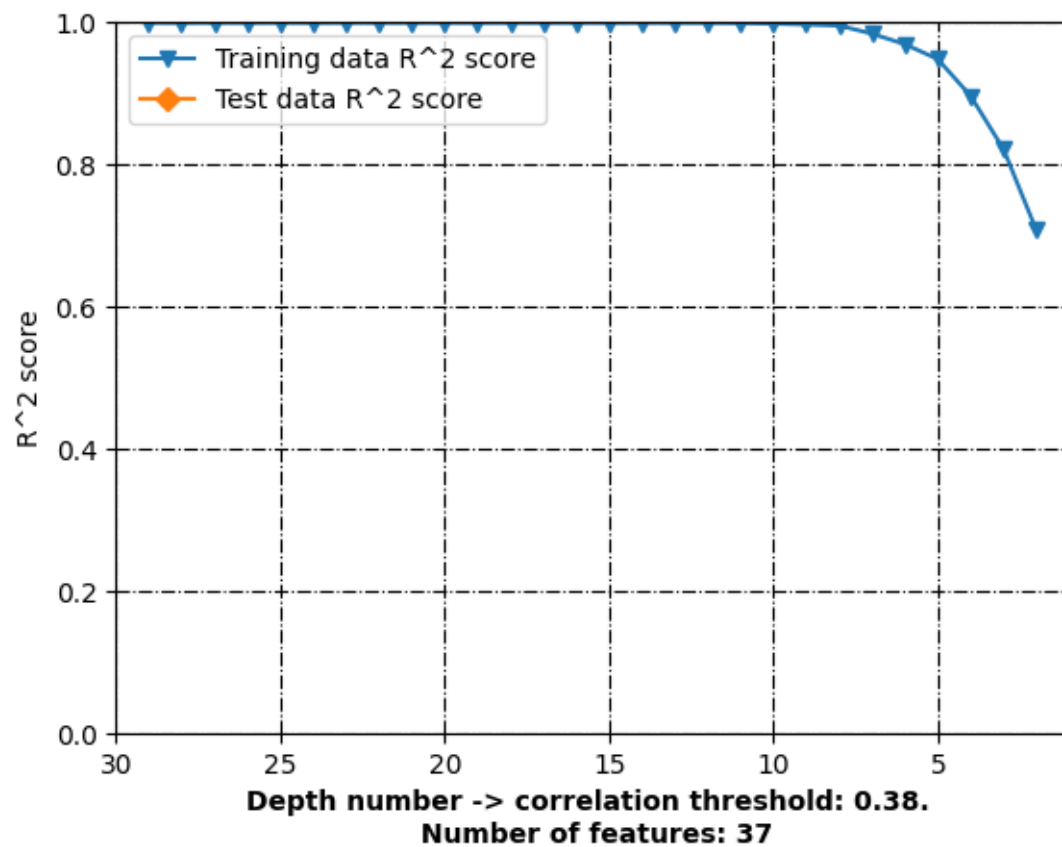

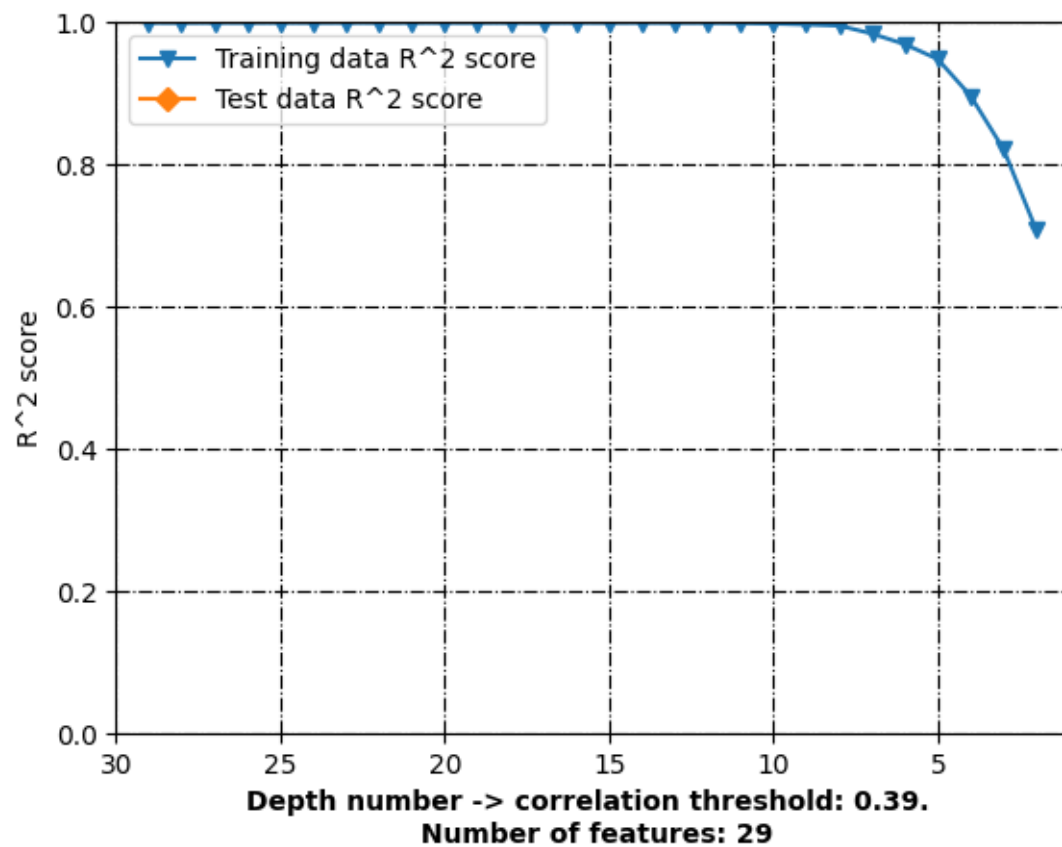

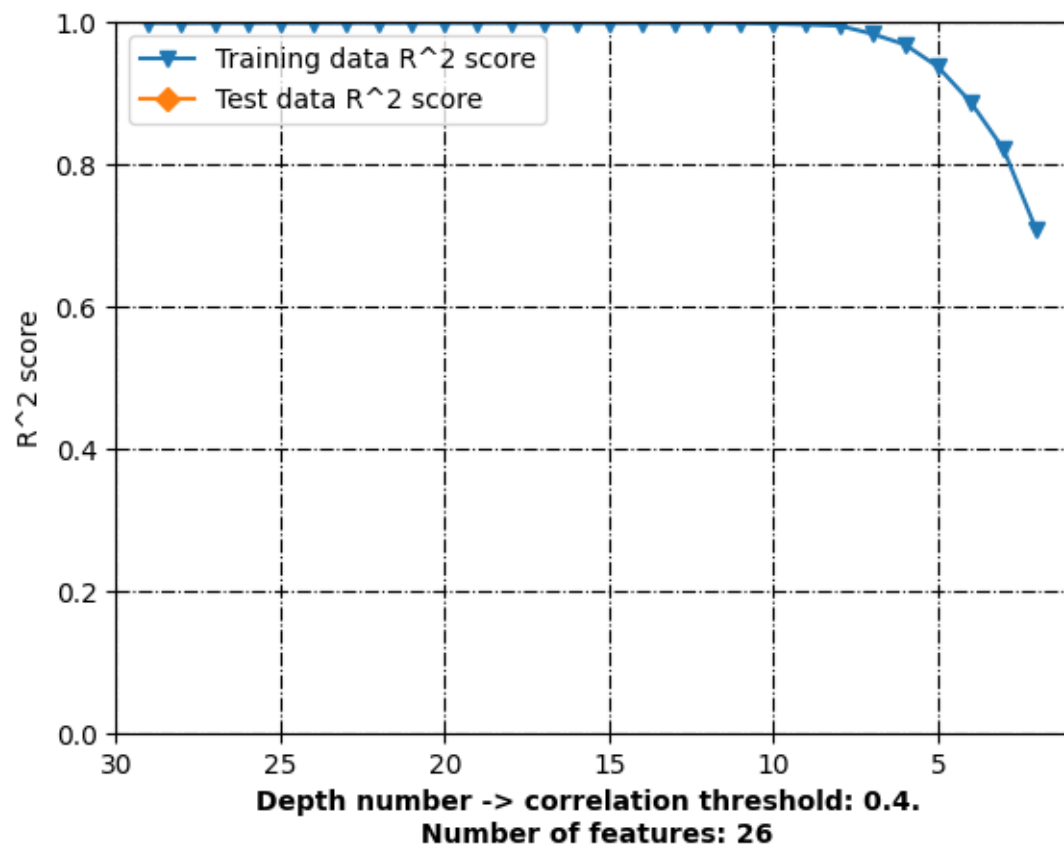

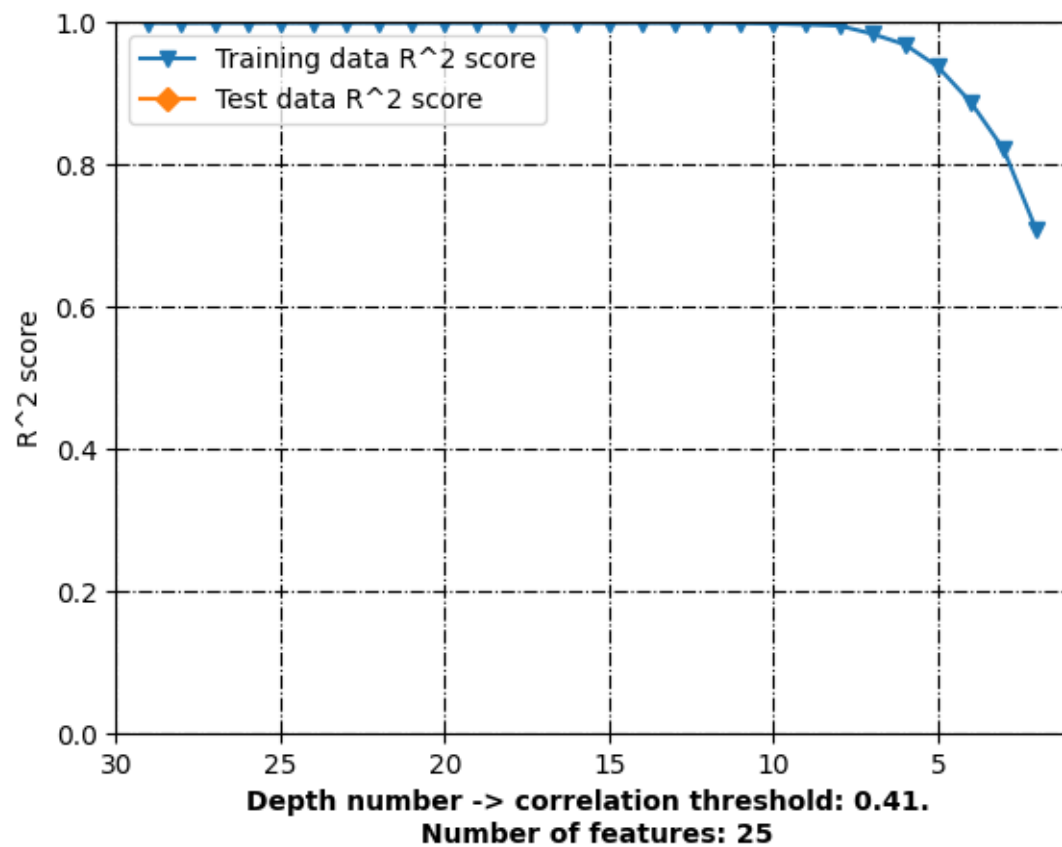

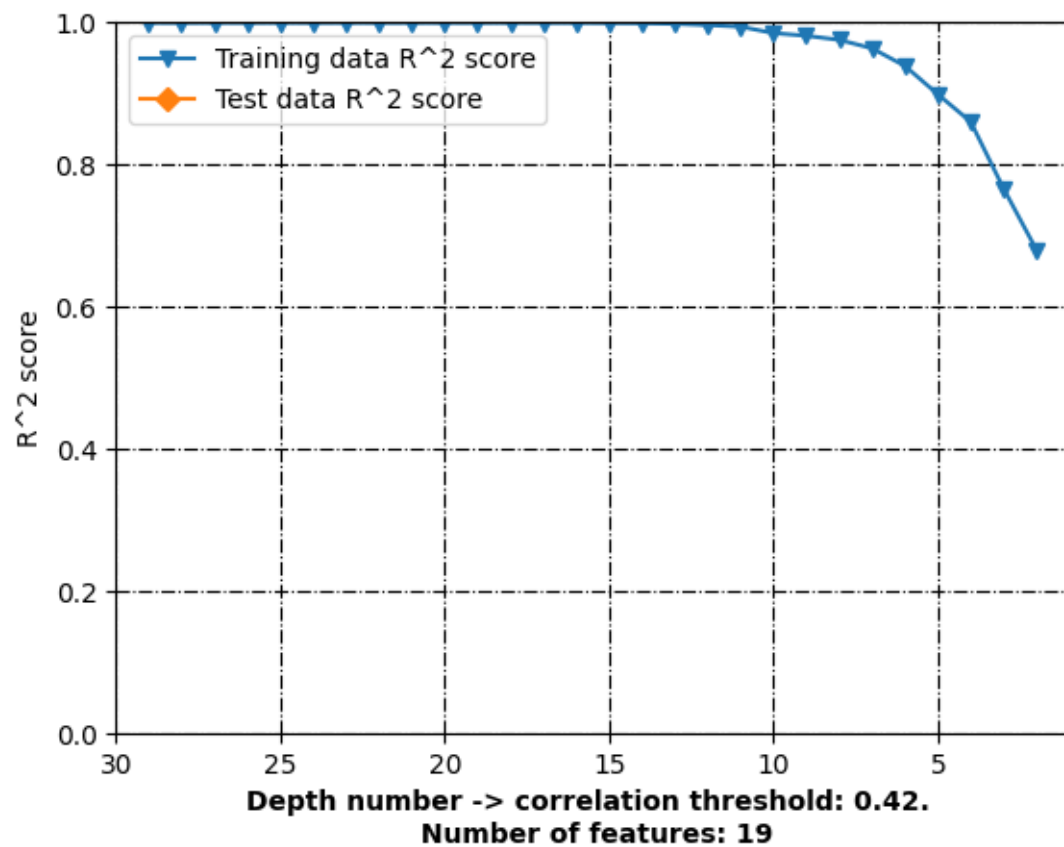

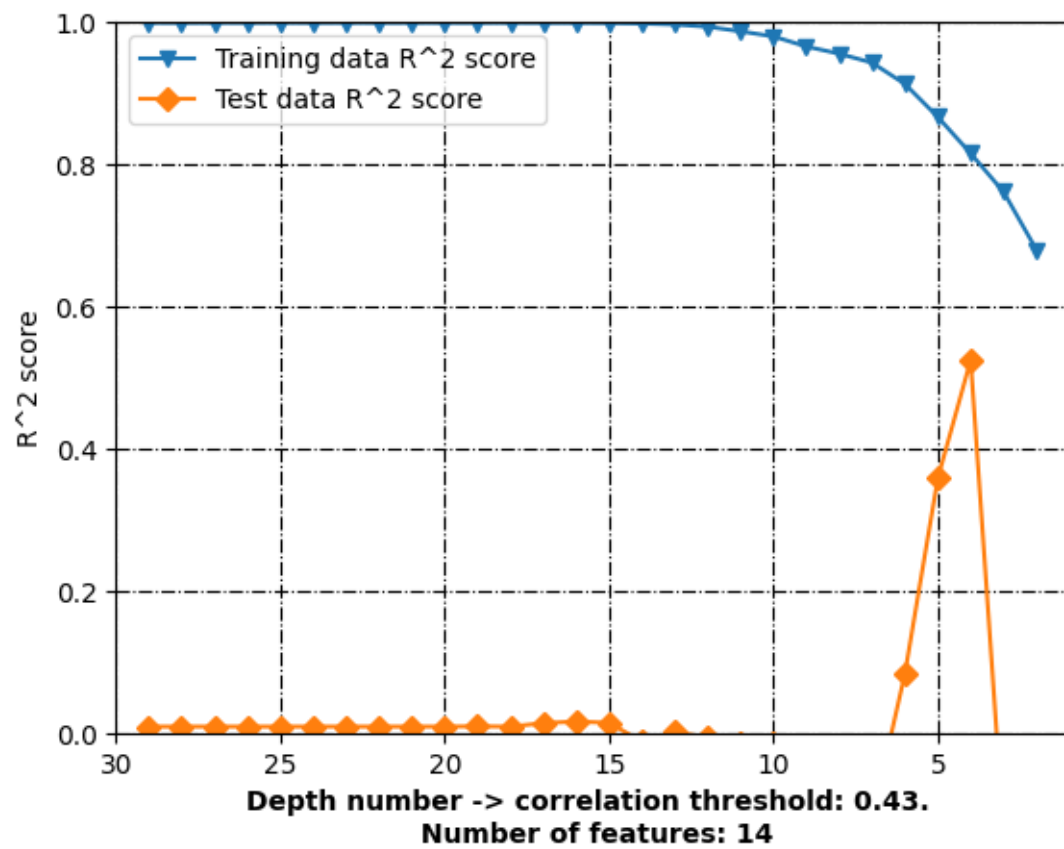

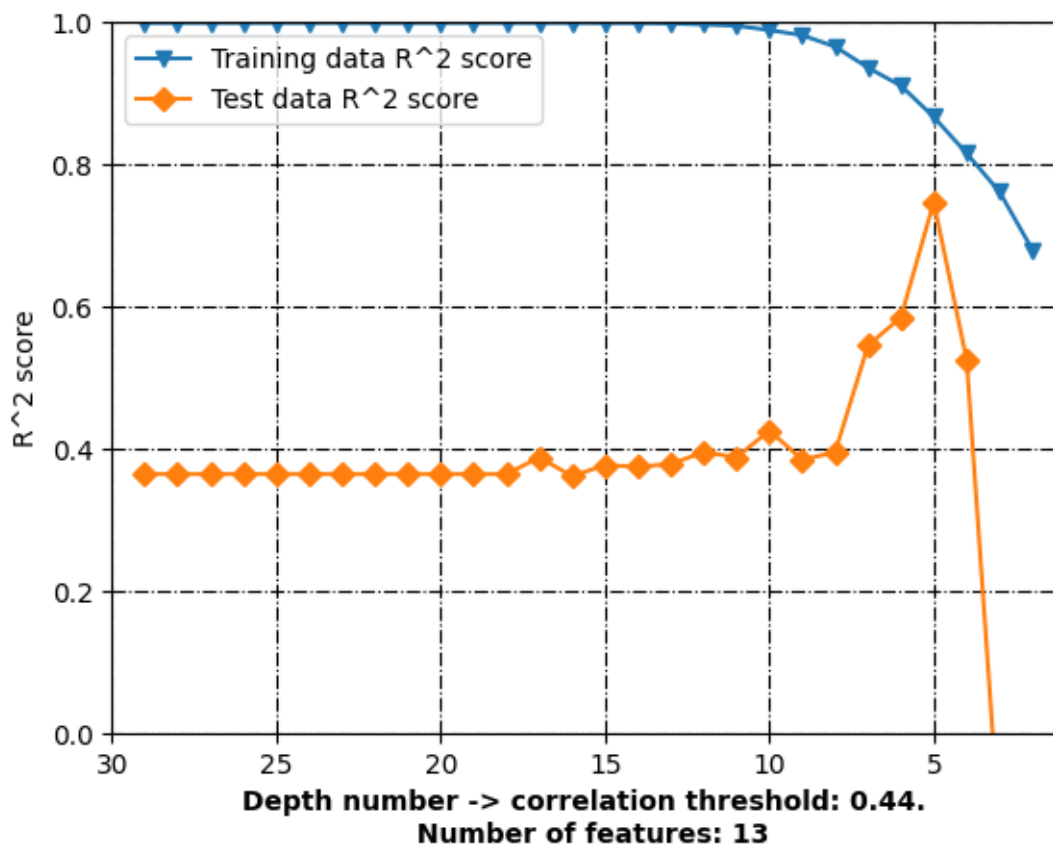

```
[ ]: plt.plot(df_without_standardization['Correlation threshold'],  
             df_without_standardization['Number of features'], label = "Number of  
             features", marker='.')  
plt.legend()  
plt.xlabel('Correlation threshold')  
plt.ylabel('Number of features')  
plt.show()
```

```
[ ]:
```

### 3 Random Forest

```
[ ]: without_standardization, train_r2_, test_r2_, hist1, hist2, target_column_name,  
     training_data_RMSE, test_data_RMSE = pred_model.  
     prepare_data_and_create_model(molecular_descriptors_df=data,  
                                   correlation_threshold=0.50,  
                                   standardization=False,
```

```

↪         model_type='RandomForestRegressor',
↪
↪         n_estimators_=12,
↪
↪         target_column_name = target,
↪
↪         random_state=random_state,
↪
↪         train_test_split_=True,
↪
↪         verbose=True)

```

```

[ ]: print(target_column_name+str('_transformed'))
     print(hist1[target_column_name].hist())

```

```

[ ]: with_standardization, train_r2_, test_r2_, hist1, hist2, target_column_name,
     ↪training_data_RMSE, test_data_RMSE = pred_model.
     ↪prepare_data_and_create_model(molecular_descriptors_df=data,
     ↪
     ↪         correlation_threshold=0.50,
     ↪
     ↪         standardization=True,
     ↪
     ↪         model_type='RandomForestRegressor',
     ↪
     ↪         n_estimators_=12,
     ↪
     ↪         target_column_name = target,
     ↪
     ↪         random_state=random_state,
     ↪
     ↪         train_test_split_=True,
     ↪
     ↪         verbose=True)

```

### 3.1 Search inside correlation space

```

[24]: step = 0.01
     initial_step = corr_low
     last_step = corr_high
     first_list = [x / 100.0 for x in range(int(initial_step*100),
     ↪int(last_step*100), int(step*100))]
     n_estimators = [range(2,21,1)]
     corr_th = []
     second_list = []

```



```

third_list = []
fourth_l = []
fifth_l = []
f_list = []
fif_list = []
for i in first_list:

    for estimator in n_estimators[0]:

        without_standardization, train_r2, test_r2, _, h_, target_column_name,
        ↪ training_data_RMSE, test_data_RMSE = pred_model.
        ↪ prepare_data_and_create_model(molecular_descriptors_df=data,

        ↪ correlation_threshold=i,

        ↪ standardization=False,

        ↪ model_type='RandomForestRegressor',

        ↪ n_estimators_=estimator,

        ↪ target_column_name = target,

        ↪ random_state=random_state,

        ↪ train_test_split_=True,

        ↪ verbose=False)
        corr_th.append(i)
        second_list.append(train_r2)
        third_list.append(test_r2)
        fourth_l.append(training_data_RMSE)
        fifth_l.append(test_data_RMSE)
        f_list.append(len(h_))
        fif_list.append(estimator)

```

```

[25]: df_without_standardization = pd.DataFrame(data=corr_th, columns=["Correlation_
        ↪ threshold"])
df_without_standardization['Training data R^2 score'] = second_list
df_without_standardization['Test data R^2 score'] = third_list
df_without_standardization['Training RMSE'] = fourth_l
df_without_standardization['Test RMSE'] = fifth_l
df_without_standardization['Number of features'] = f_list
df_without_standardization['Number of estimators'] = fif_list

```

```

[26]: df_random_forest = df_without_standardization.copy()
      #df_without_standardization.to_excel('../Data/
      ↪A549_Random_forest_rs_'+str(random_state)+'.xlsx')

[27]: corre_list = [x / 100.0 for x in range(int(initial_step*100),
      ↪int(last_step*100), int(0.01*100))]
      for element in corre_list:
          element_ =
          ↪df_without_standardization[df_without_standardization['Correlation_
          ↪threshold'] == float(element)]
          plt.plot(element_['Number of estimators'], element_['Training data R^2_
          ↪score'], label = "Training data R^2 score", marker='v')
          plt.plot(element_['Number of estimators'], element_['Test data R^2 score'],
          ↪label = "Test data R^2 score", marker='D')
          plt.legend()
          plt.xlabel('Number of estimators -> correlation threshold: '+str(element)+'.'
          ↪\n Number of features: '+str(element_['Number of features'].iloc[0]))
          plt.xlim(max(element_['Number of estimators'])+1, min(element_['Number of_
          ↪estimators'])-1)
          plt.ylabel('R^2 score')
          plt.ylim([0, 1])
          plt.rc('grid', linestyle="-. ", color='black')
          plt.grid(True)
          plt.show()

```

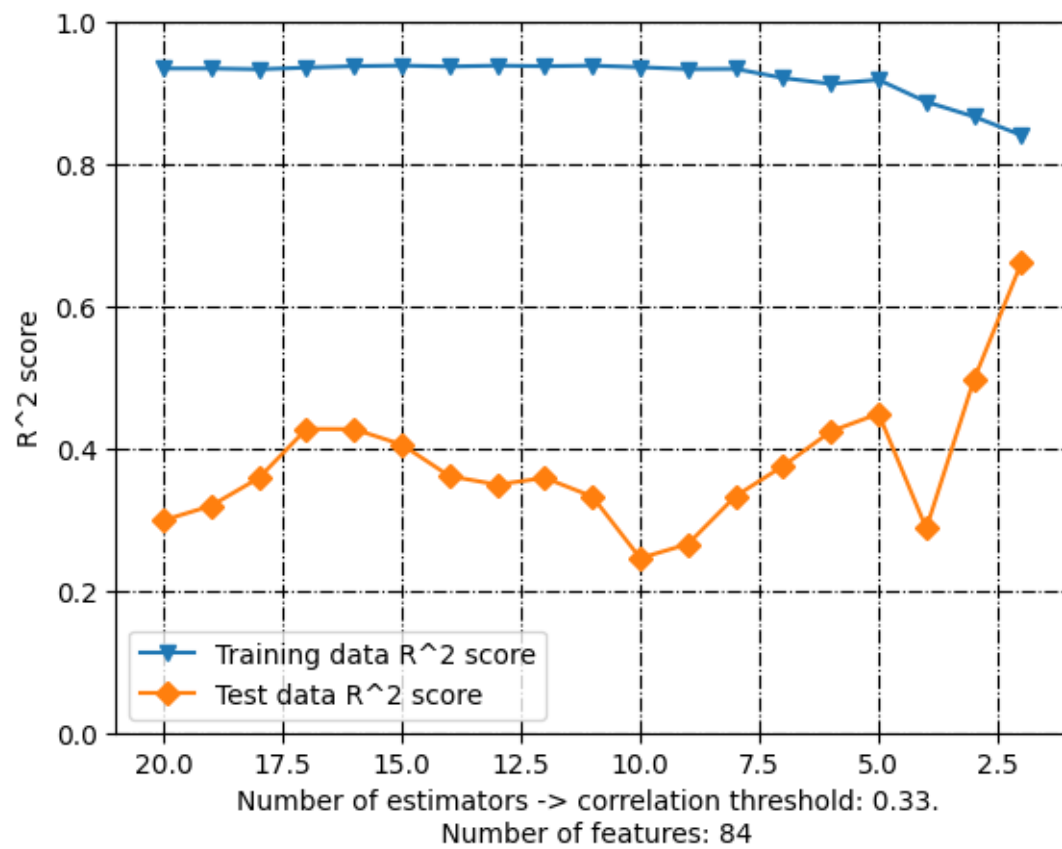

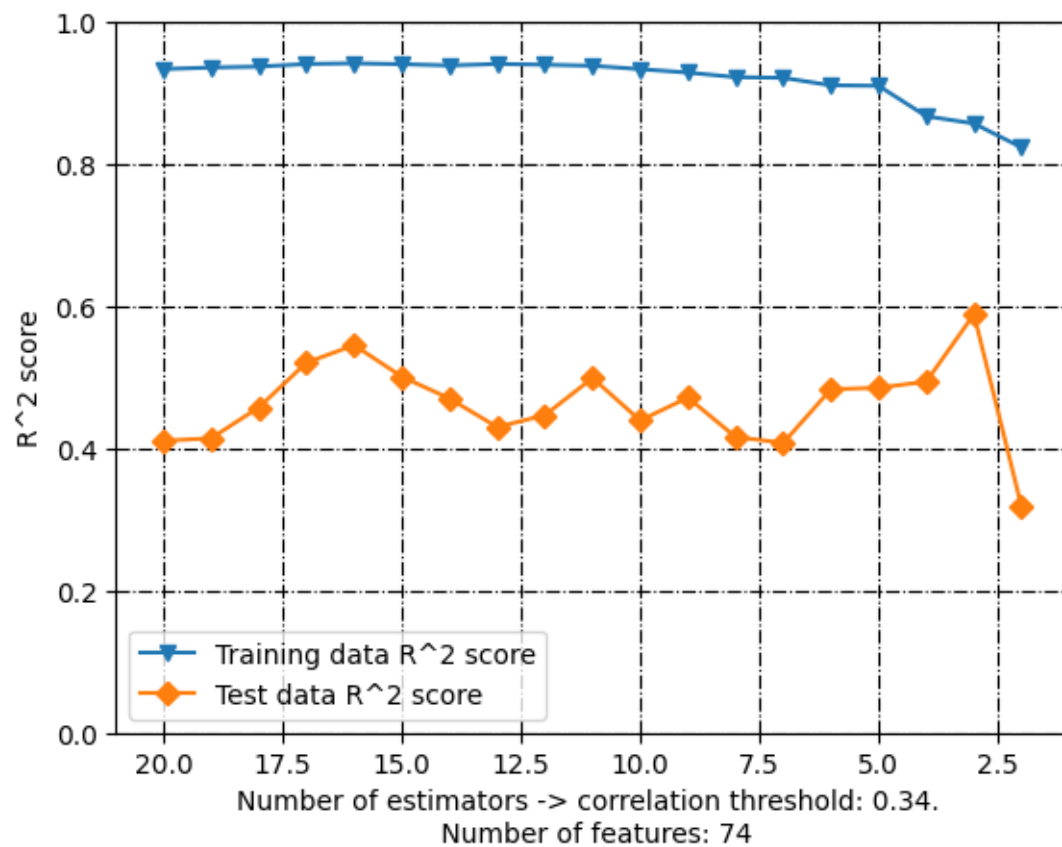

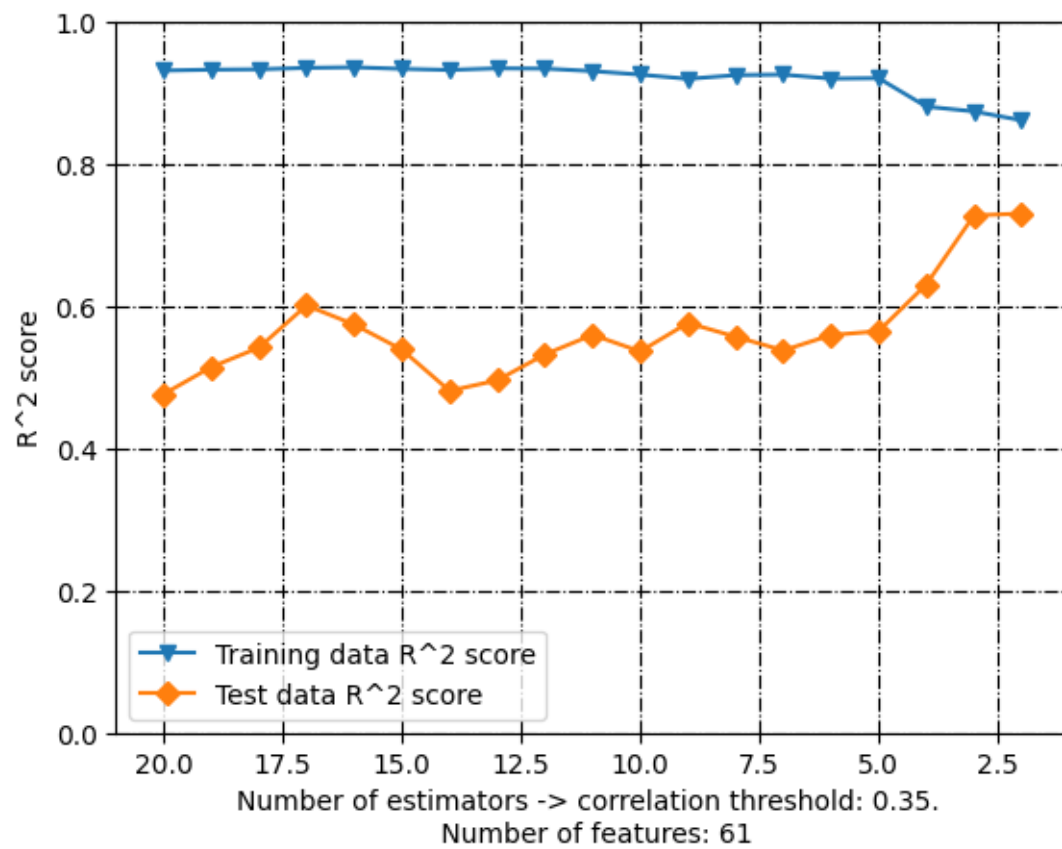

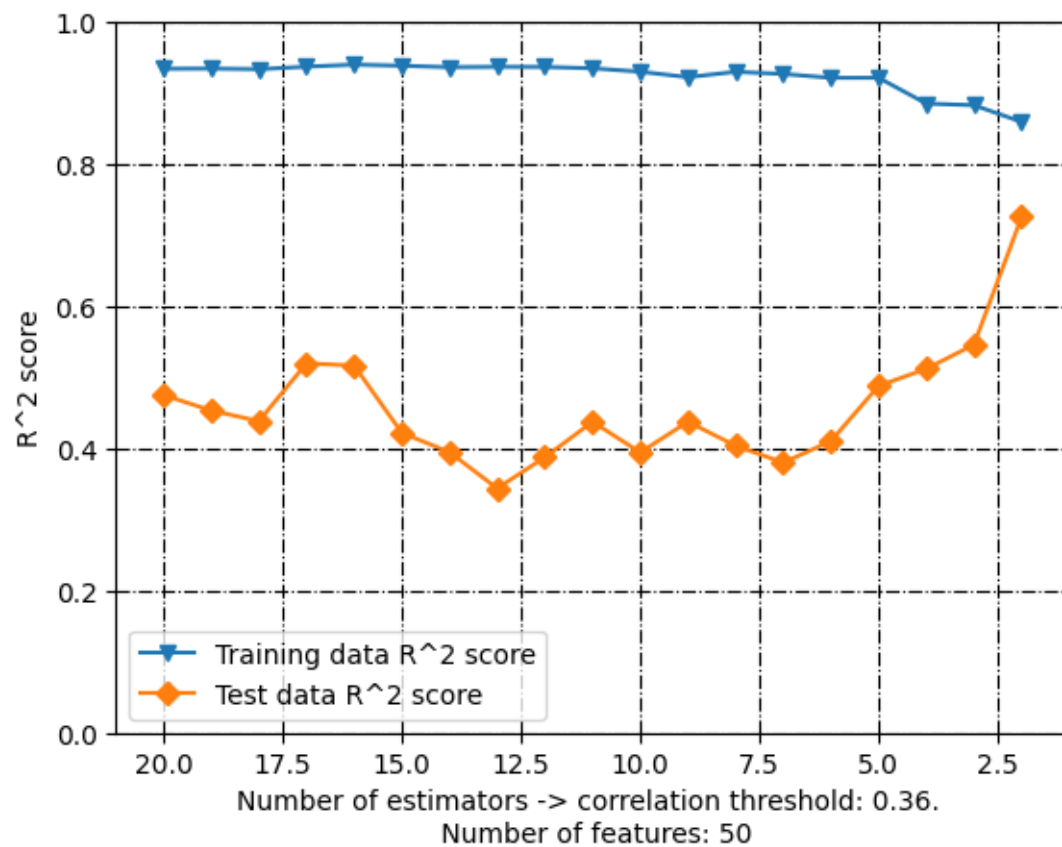

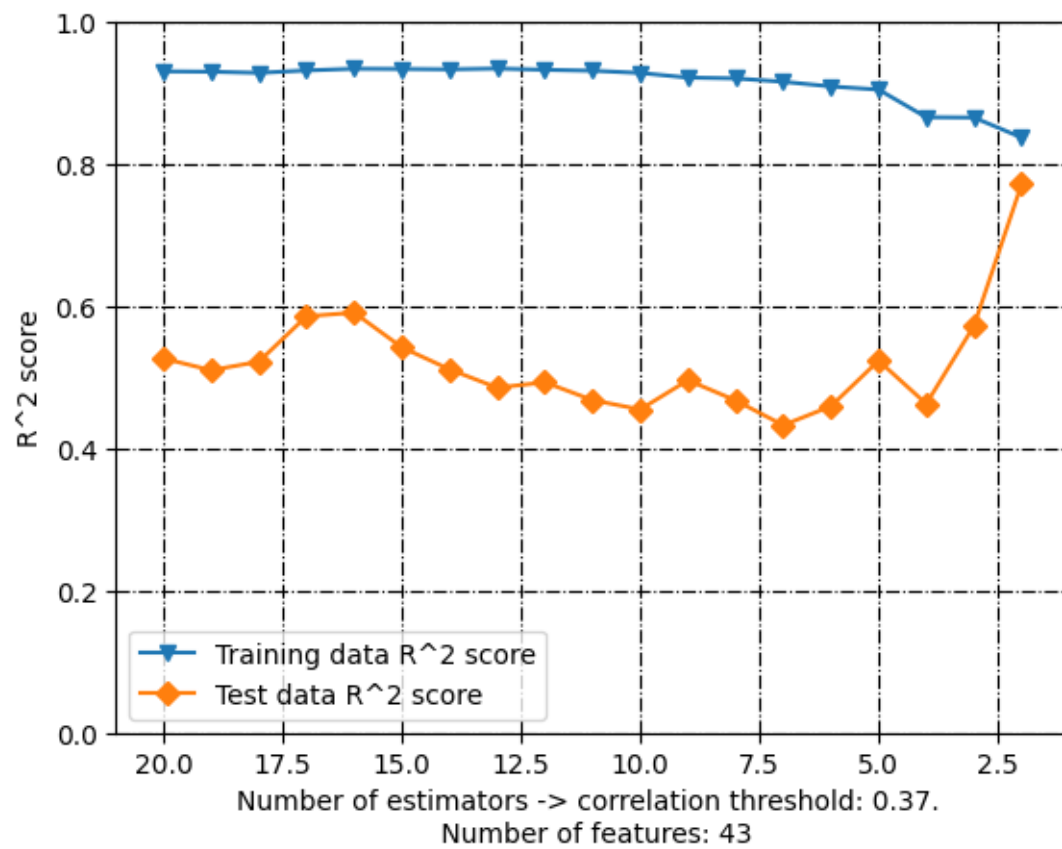

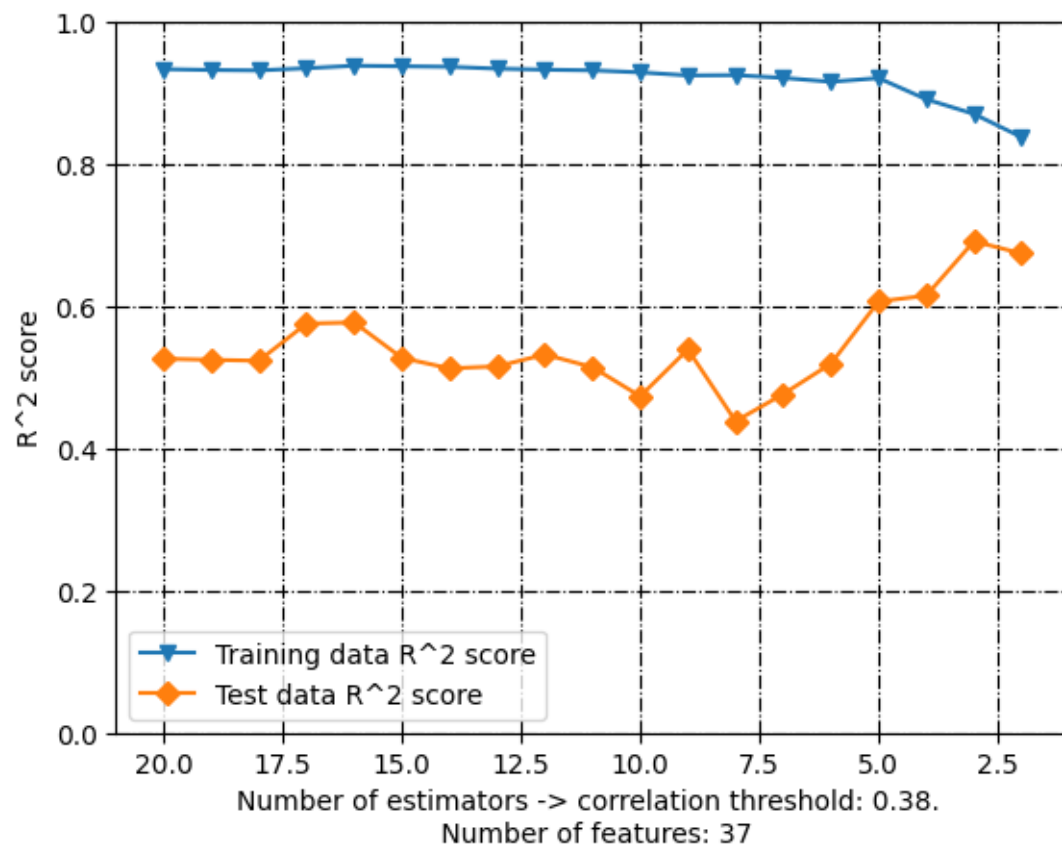



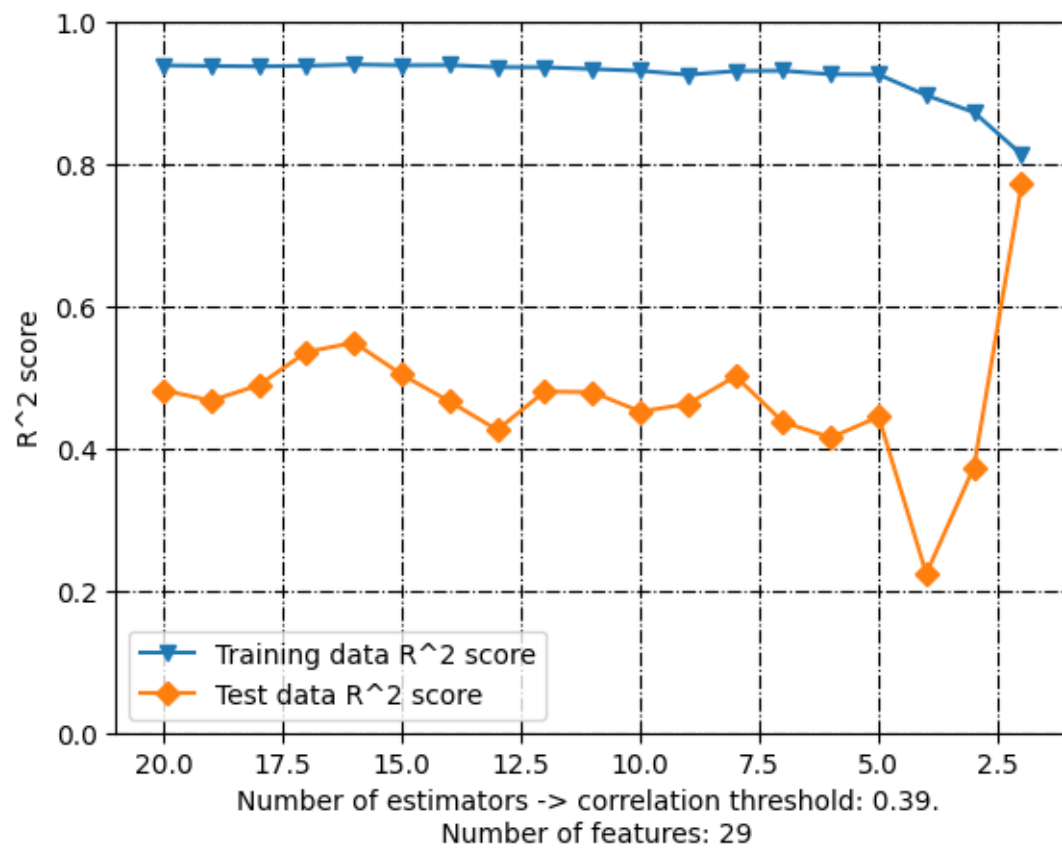

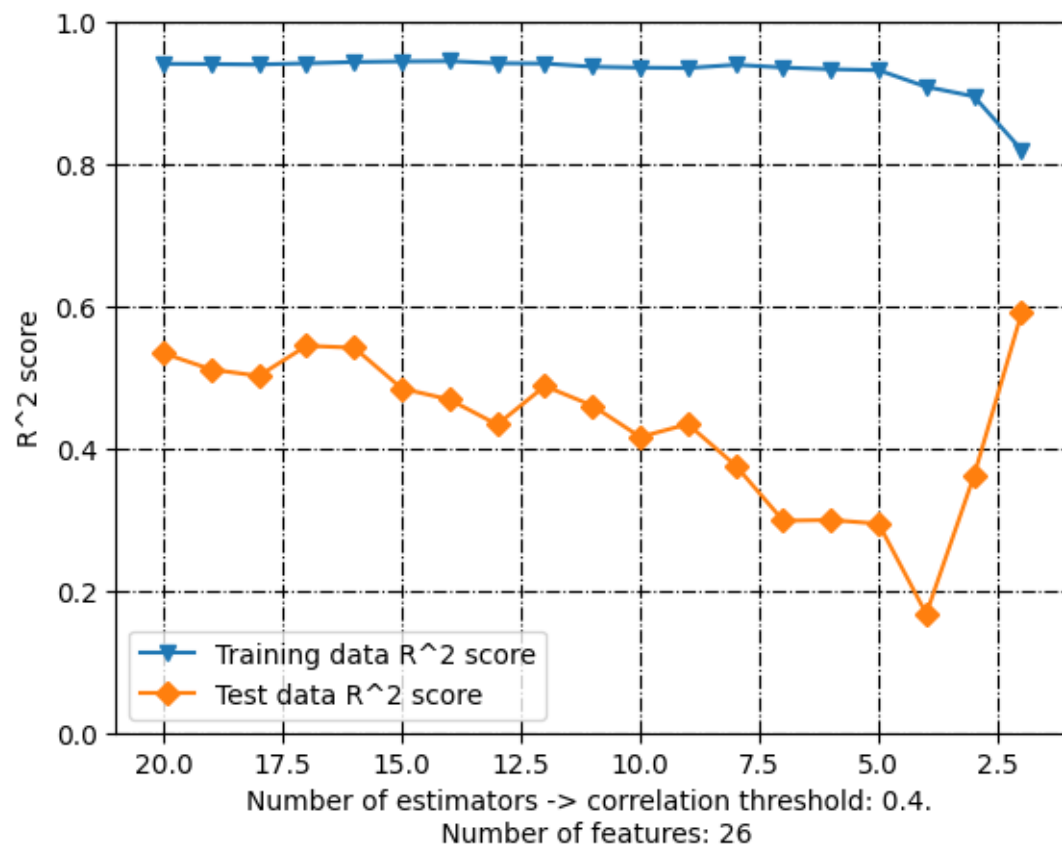

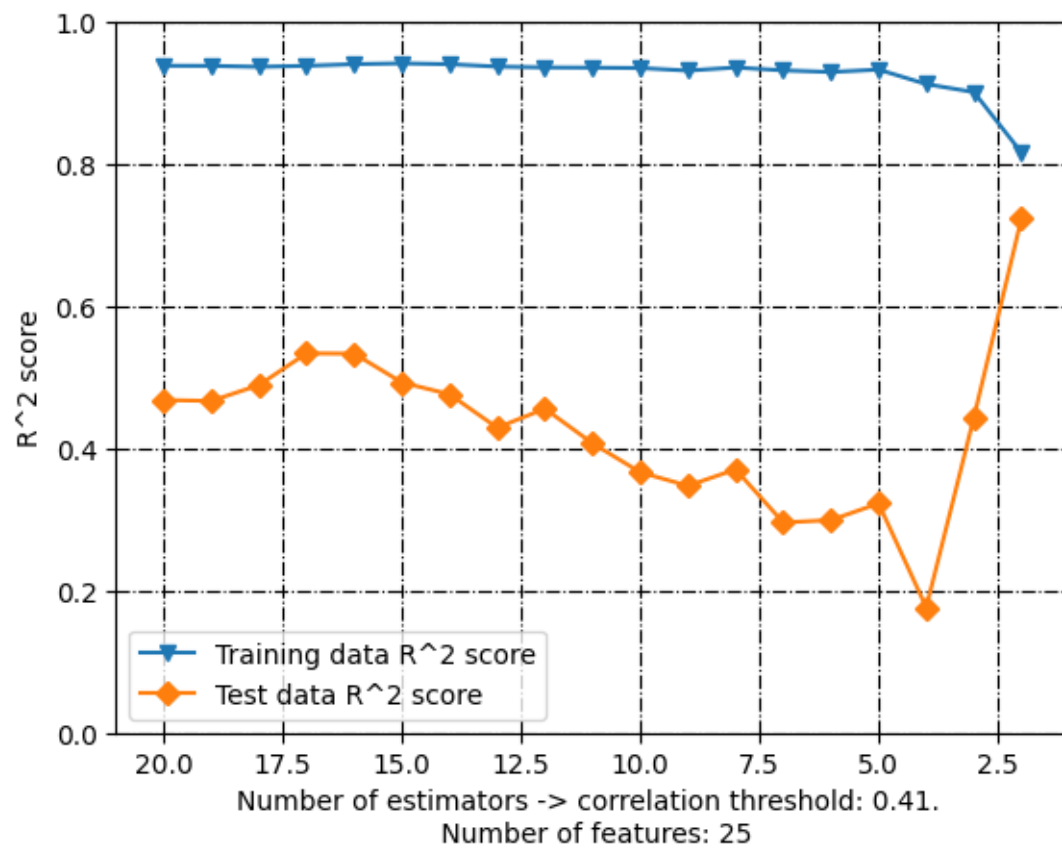

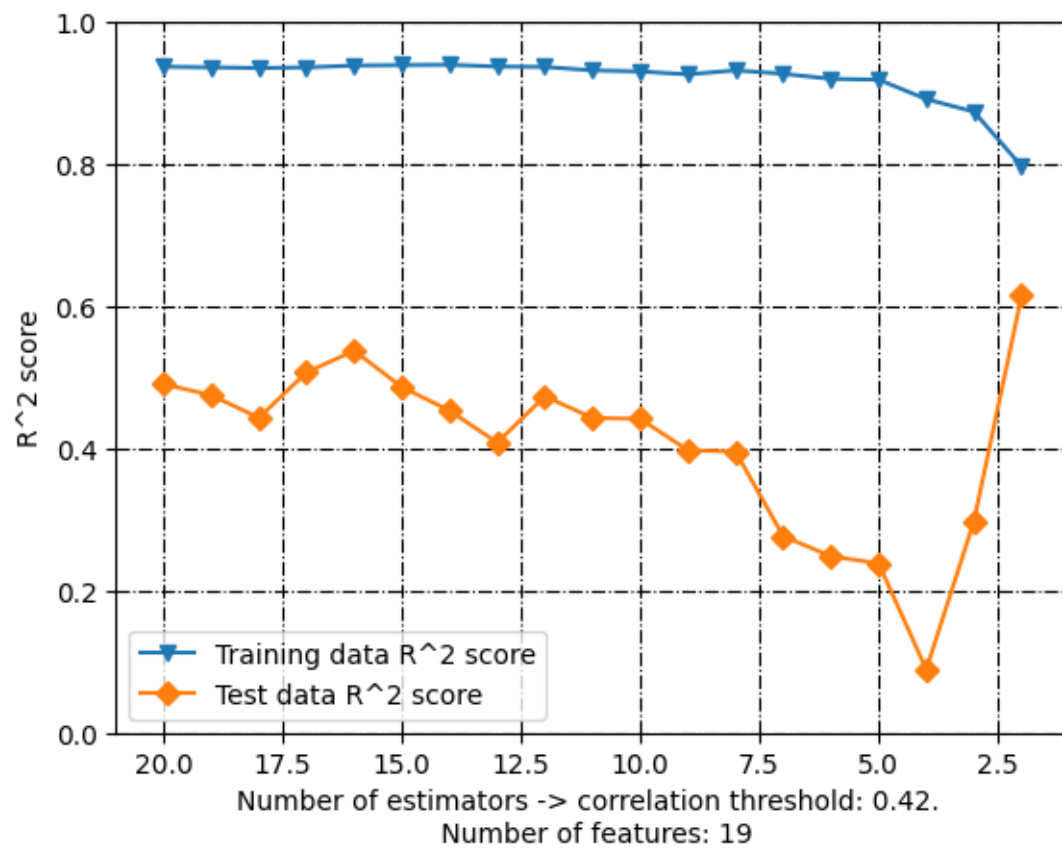

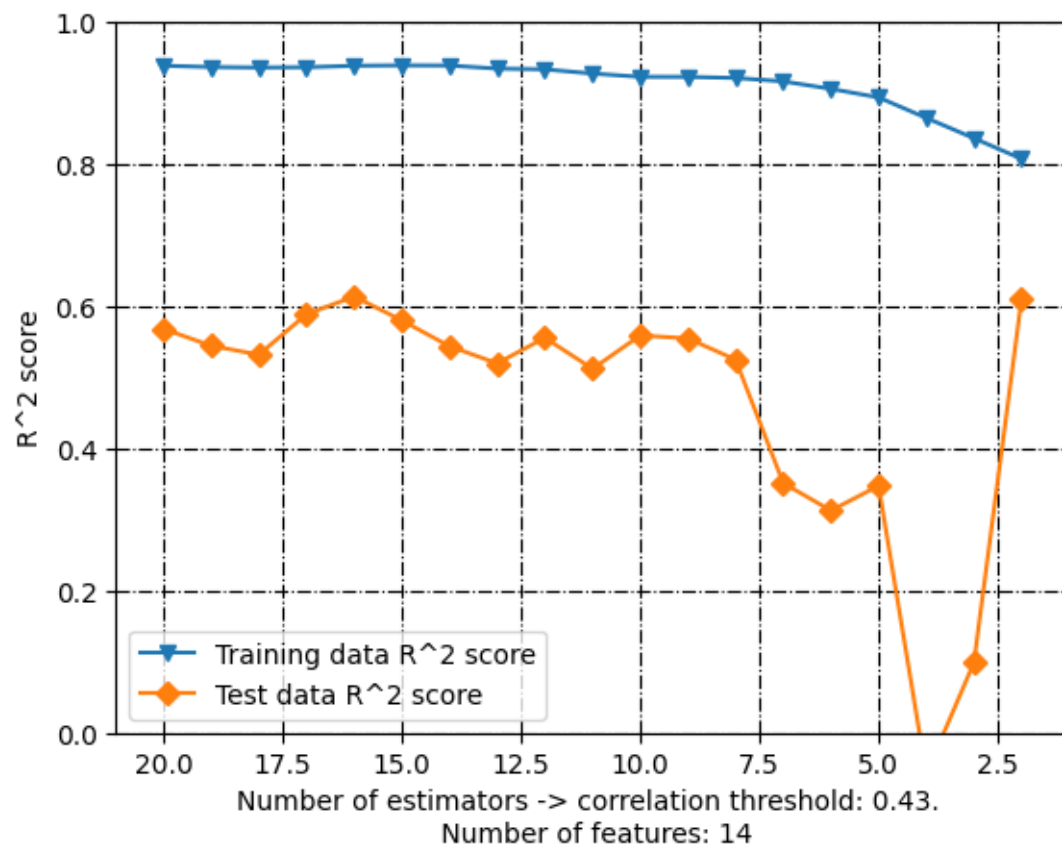

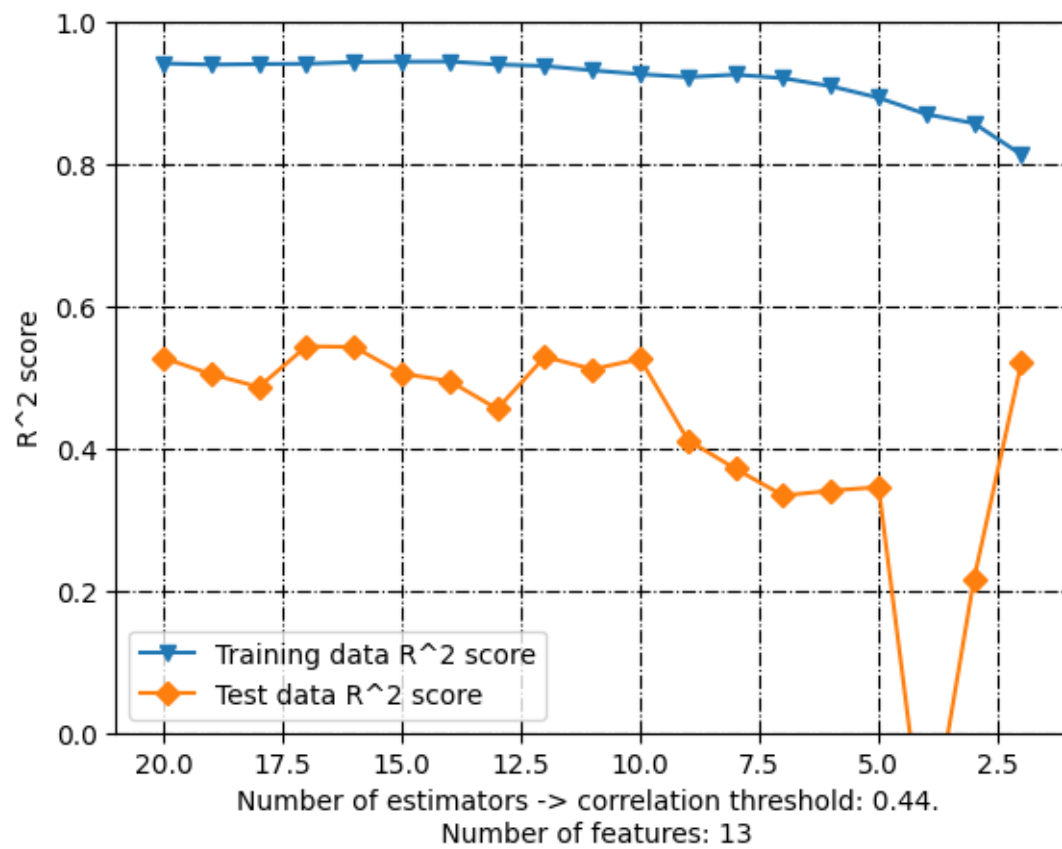

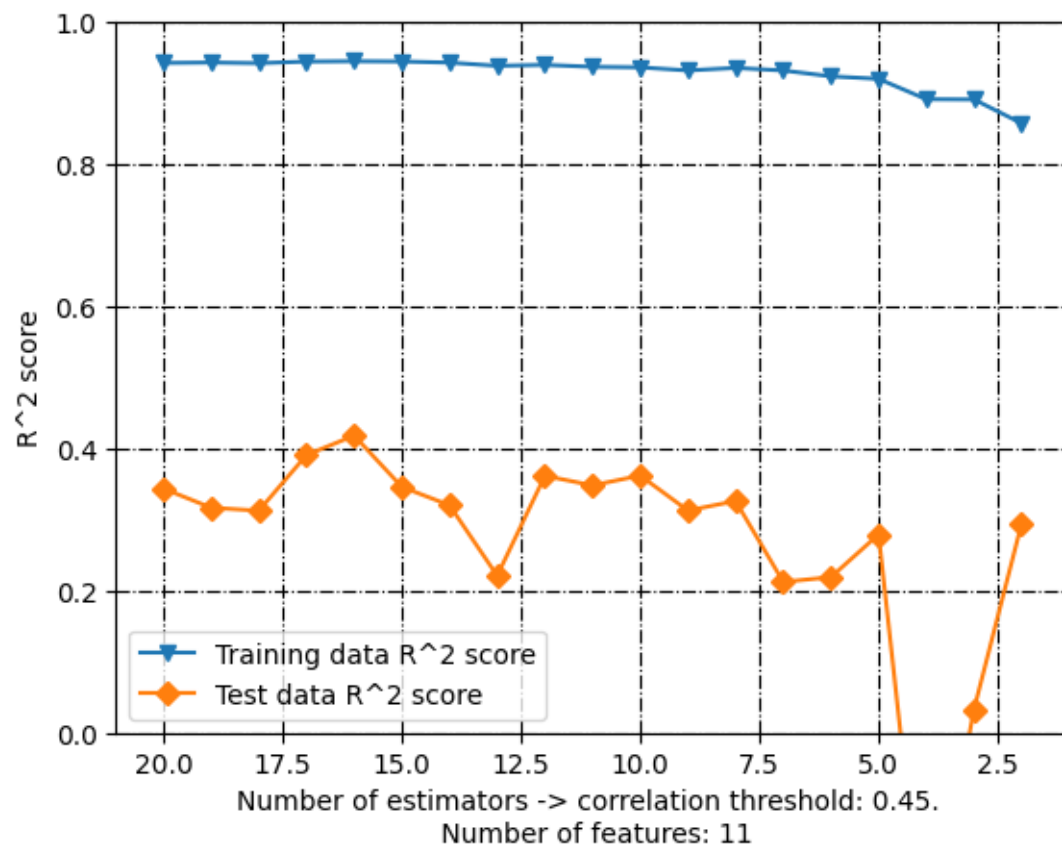

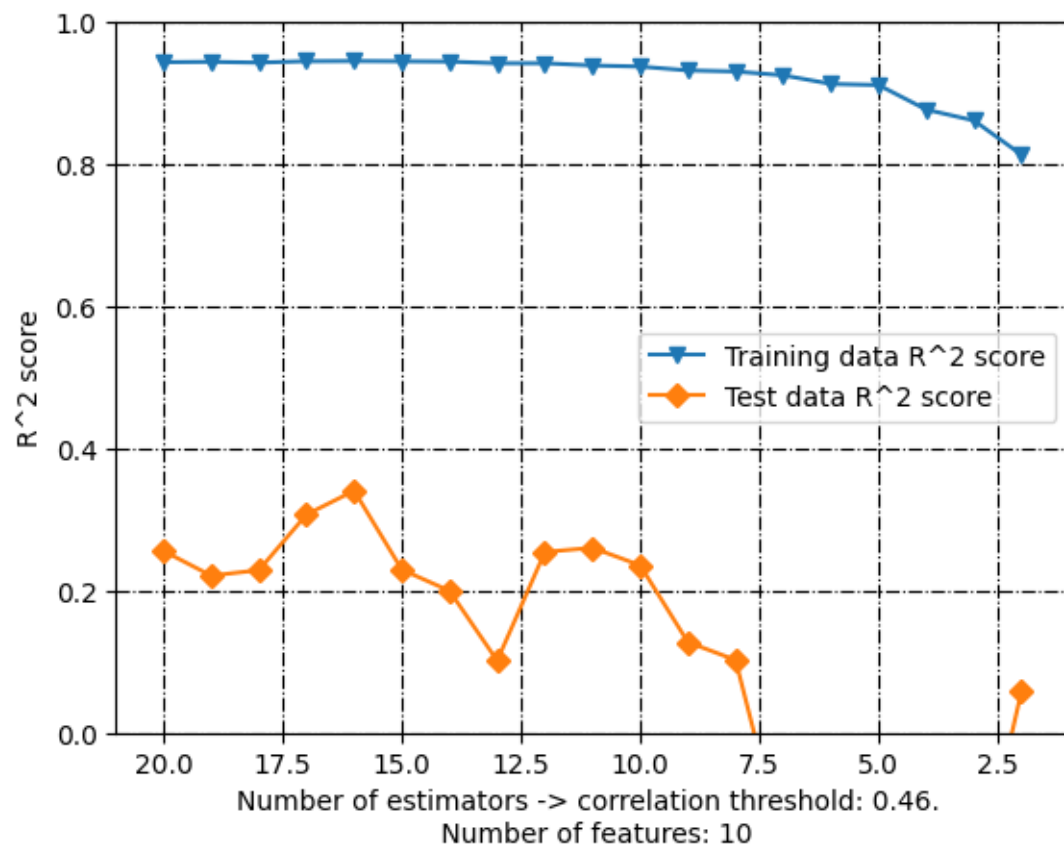



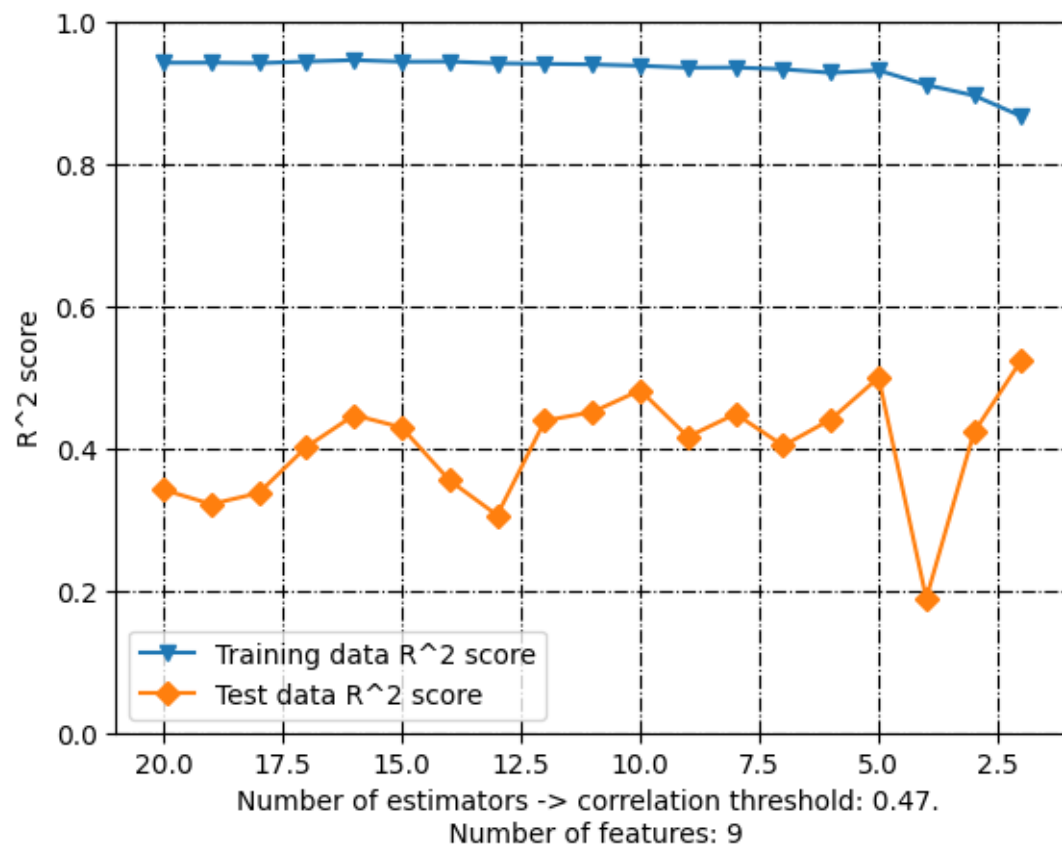

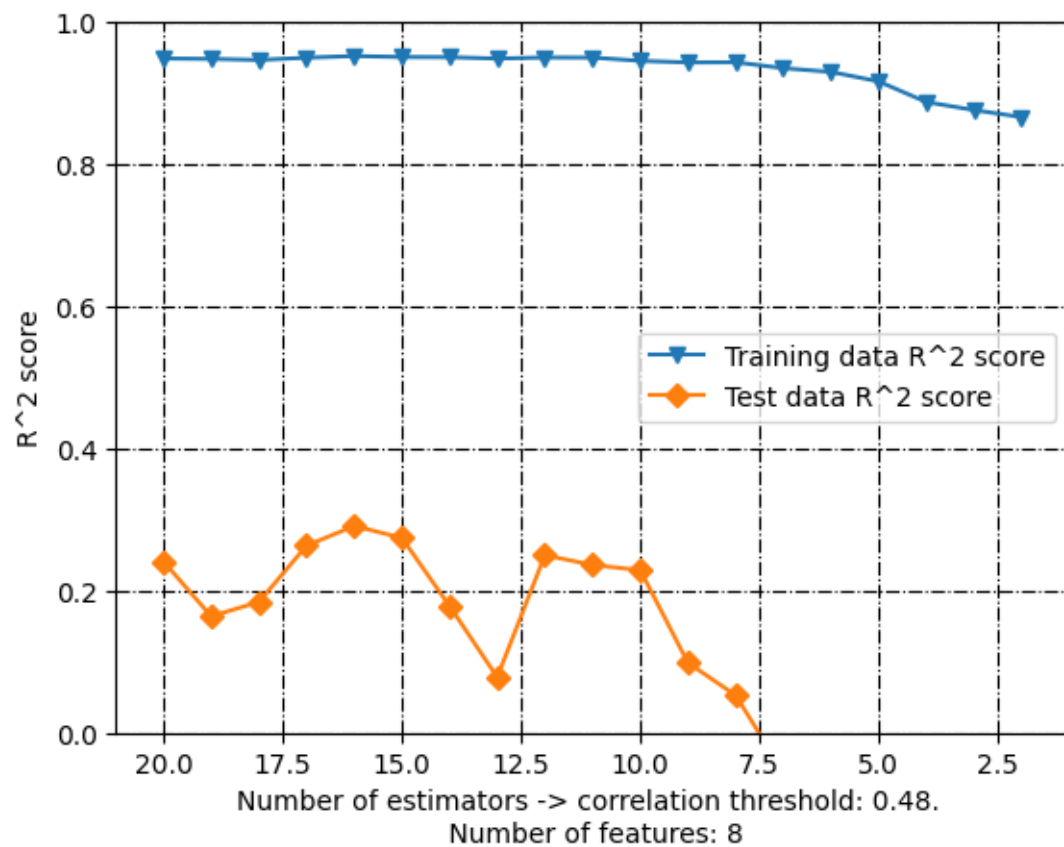

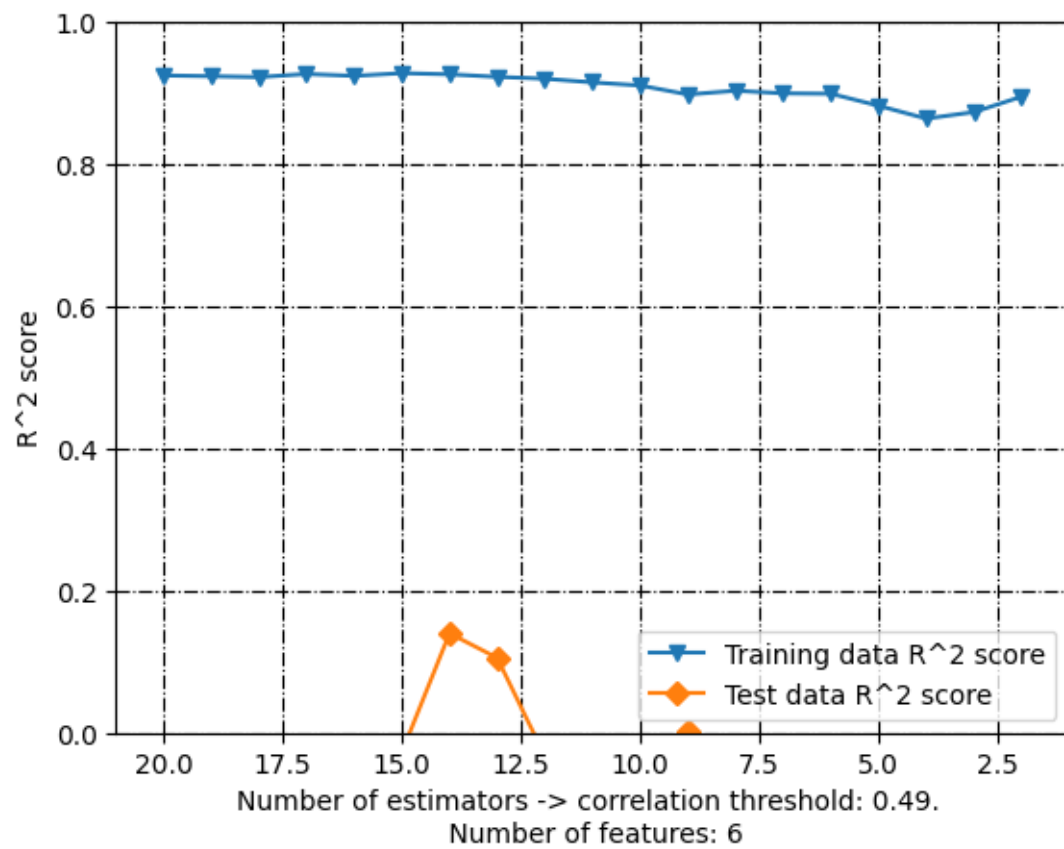

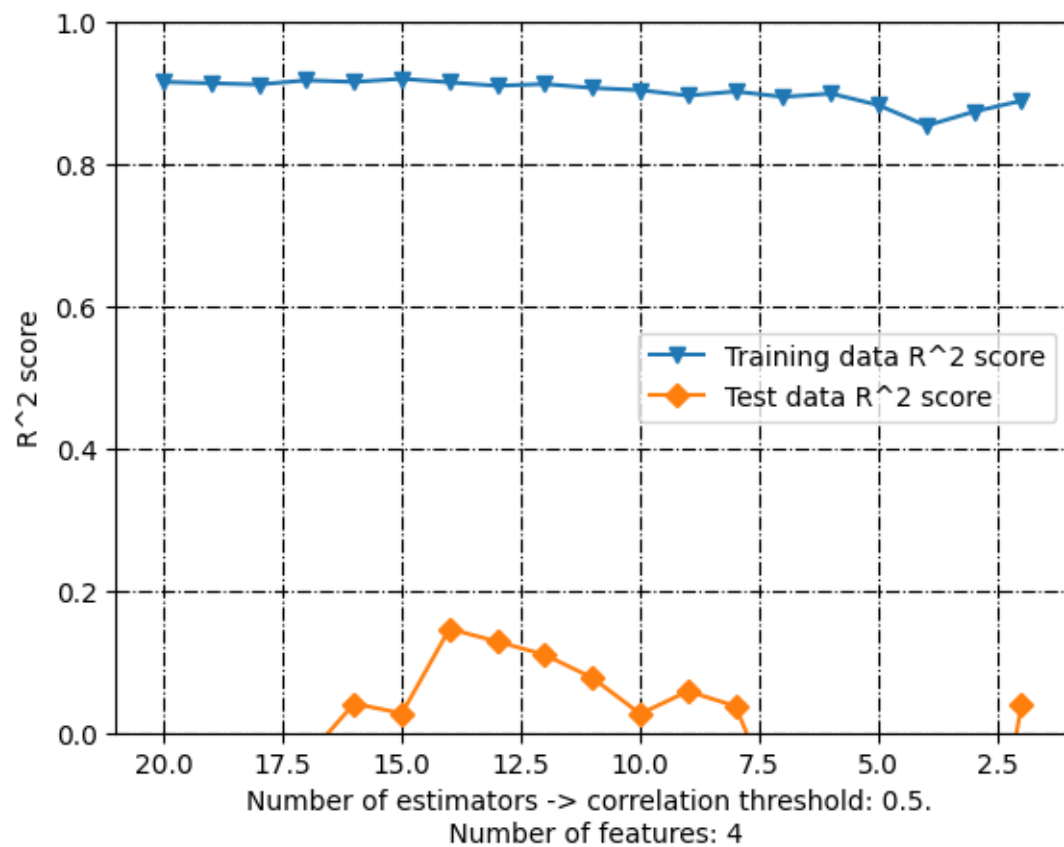

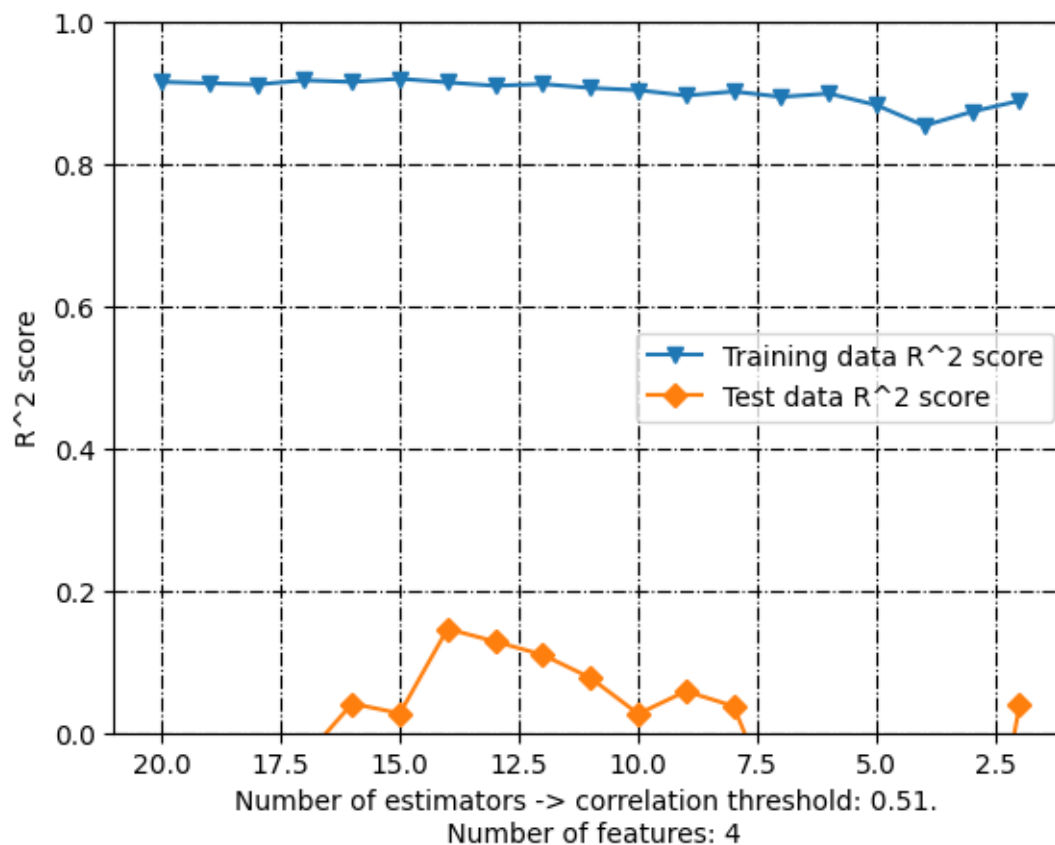

```
[28]: plt.plot(df_without_standardization['Correlation threshold'],  
             df_without_standardization['Number of features'], label = "Number of  
             features", marker='.')  
plt.legend()  
plt.xlabel('Correlation threshold')  
plt.ylabel('Number of features')  
plt.show()
```



[ ]:

## 4 KNeighborsRegressor

```
[29]: without_standardization, train_r2_, test_r2_, hist1, hist2, target_column_name,
      ↪ training_data_RMSE, test_data_RMSE = pred_model.
      ↪ prepare_data_and_create_model(molecular_descriptors_df=data,
      ↪
      ↪         correlation_threshold=0.50,
      ↪
      ↪         standardization=False,
      ↪
      ↪         model_type='KNeighborsRegressor',
      ↪
      ↪         target_column_name = target,
      ↪
      ↪         random_state=random_state,
      ↪
      ↪         train_test_split_=True,
```



verbose=True)



I am not doing standardization...

```
molecular descriptor name
0          AATSOZ
1          AATSOare
2          AATSOd
3          AATSOdv
4          AATSOi
molecular descriptor name  corr_value
0          AATSOZ          -0.038502
1          AATSOare        -0.120847
2          AATSOd          0.041648
3          AATSOdv         -0.115899
4          AATSOi          0.191765
molecular descriptor name  corr_value  absolute correlation value
0          AATSOZ          -0.038502          0.038502
1          AATSOare        -0.120847          0.120847
2          AATSOd          0.041648          0.041648
3          AATSOdv         -0.115899          0.115899
4          AATSOi          0.191765          0.191765
molecular descriptor name  corr_value  absolute correlation value
226          AMID_0        -0.520578          0.520578
505          EState_VSA5    -0.578904          0.578904
506          EState_VSA6    0.519794          0.519794
791          MDEO-12        -0.525441          0.525441
1211         MCF-7         1.000000          1.000000
molecular descriptor name  corr_value  absolute correlation value
226          AMID_0        -0.520578          0.520578
505          EState_VSA5    -0.578904          0.578904
506          EState_VSA6    0.519794          0.519794
791          MDEO-12        -0.525441          0.525441
The model used is: KNeighbors...
Return the coefficient of determination of the prediction:
0.17887598286330386
R^2 score: 0.5373267326789486
Correlation coefficient: 0.7330257380740111
Test data - unseen during training:
R^2 score: 0.17887598286330386
Correlation coefficient: 0.4229373273468586
[8.27886876 6.39366104 7.6963417 6.53369885 7.95214323 7.55661724
 7.94489513 8.26275858 6.18458136 7.8150608 7.57914848 8.14325294
 7.83929455 8.13033937 7.35856211 7.57972486 7.58116176 6.79653745]
113      8.022276
35       6.066513
101      6.920819
36       6.108463
```

```

100    7.376751
13     7.987163
0      7.987163
114    7.823909
104    8.397940
96     7.920819
40     8.091515
103    8.376751
48     7.886057
39     8.455932
14     8.086186
117    5.920819
21     8.113509
9      6.143150
Name: MCF-7, dtype: float64
Training Root Mean Square Error: 0.659077344888441
Testing Root Mean Square Error: 0.7814887183280818

```

```

[30]: print(target_column_name+str('_transformed'))
      print(hist1[target_column_name].hist())

```

```

MCF-7_transformed
AxesSubplot(0.125,0.11;0.775x0.77)

```





```
[31]: with_standardization, train_r2_, test_r2_, hist1, hist2, target_column_name,
      ↪ training_data_RMSE, test_data_RMSE = pred_model.
      ↪ prepare_data_and_create_model(molecular_descriptors_df=data,
      ↪
      ↪ correlation_threshold=0.50,
      ↪
      ↪ standardization=True,
      ↪
      ↪ model_type='KNeighborsRegressor',
      ↪
      ↪ target_column_name = target,
      ↪
      ↪ random_state=random_state,
      ↪
      ↪ train_test_split_=True,
      ↪
      ↪ verbose=True)
```

I am doing standardization...

|      | molecular descriptor name |            |                            |
|------|---------------------------|------------|----------------------------|
| 0    | AATSOZ                    |            |                            |
| 1    | AATSOare                  |            |                            |
| 2    | AATSOd                    |            |                            |
| 3    | AATSOdv                   |            |                            |
| 4    | AATSOi                    |            |                            |
|      | molecular descriptor name | corr_value |                            |
| 0    | AATSOZ                    | -0.038502  |                            |
| 1    | AATSOare                  | -0.120847  |                            |
| 2    | AATSOd                    | 0.041648   |                            |
| 3    | AATSOdv                   | -0.115899  |                            |
| 4    | AATSOi                    | 0.191765   |                            |
|      | molecular descriptor name | corr_value | absolute correlation value |
| 0    | AATSOZ                    | -0.038502  | 0.038502                   |
| 1    | AATSOare                  | -0.120847  | 0.120847                   |
| 2    | AATSOd                    | 0.041648   | 0.041648                   |
| 3    | AATSOdv                   | -0.115899  | 0.115899                   |
| 4    | AATSOi                    | 0.191765   | 0.191765                   |
|      | molecular descriptor name | corr_value | absolute correlation value |
| 226  | AMID_0                    | -0.520578  | 0.520578                   |
| 505  | EState_VSA5               | -0.578904  | 0.578904                   |
| 506  | EState_VSA6               | 0.519794   | 0.519794                   |
| 791  | MDEO-12                   | -0.525441  | 0.525441                   |
| 1211 | MCF-7                     | 1.000000   | 1.000000                   |
|      | molecular descriptor name | corr_value | absolute correlation value |
| 226  | AMID_0                    | -0.520578  | 0.520578                   |
| 505  | EState_VSA5               | -0.578904  | 0.578904                   |
| 506  | EState_VSA6               | 0.519794   | 0.519794                   |

```

791                MDE0-12    -0.525441                0.525441
The model used is: KNeighbors...
Return the coefficient of determination of the prediction:
0.17887598286330386
R^2 score: 0.5373267326789486
Correlation coefficient: 0.7330257380740111
Test data - unseen during training:
R^2 score: 0.17887598286330386
Correlation coefficient: 0.4229373273468586
[8.27886876 6.39366104 7.6963417  6.53369885 7.95214323 7.55661724
 7.94489513 8.26275858 6.18458136 7.8150608  7.57914848 8.14325294
 7.83929455 8.13033937 7.35856211 7.57972486 7.58116176 6.79653745]
113      8.022276
35       6.066513
101      6.920819
36       6.108463
100      7.376751
13       7.987163
0        7.987163
114      7.823909
104      8.397940
96       7.920819
40       8.091515
103      8.376751
48       7.886057
39       8.455932
14       8.086186
117      5.920819
21       8.113509
9        6.143150
Name: MCF-7, dtype: float64
Training Root Mean Square Error: 0.659077344888441
Testing Root Mean Square Error: 0.7814887183280818

```

#### 4.1 Search inside correlation space

```

[32]: step = 0.01
initial_step = corr_low
last_step = corr_high
first_list = [x / 100.0 for x in range(int(initial_step*100),
    ↪int(last_step*100), int(step*100))]
second_list = []
third_list = []
fourth_l = []
fifth_l = []
f_list = []
for i in first_list:

```

```

    without_standardization, train_r2, test_r2, _, h_, target_column_name,
    ↪training_data_RMSE, test_data_RMSE = pred_model.
    ↪prepare_data_and_create_model(molecular_descriptors_df = data,

    ↪
        correlation_threshold = i,

    ↪
        standardization = False,

    ↪
        model_type = 'KNeighborsRegressor',

    ↪
        target_column_name = target,

    ↪
        random_state=random_state,

    ↪
        train_test_split_ = True,

    ↪
        verbose = False)
    second_list.append(train_r2)
    third_list.append(test_r2)
    fourth_l.append(training_data_RMSE)
    fifth_l.append(test_data_RMSE)
    f_list.append(len(h_))

```

File "C:\Users\aleks\anaconda3\envs\cheminf\_gpu\lib\site-packages\joblib\externals\loky\backend\context.py", line 217, in \_count\_physical\_cores  
 raise ValueError(

```

[33]: df_without_standardization = pd.DataFrame(data=first_list,
    ↪columns=["Correlation threshold"])
df_without_standardization['Training data R^2 score'] = second_list
df_without_standardization['Test data R^2 score'] = third_list
df_without_standardization['Training RMSE'] = fourth_l
df_without_standardization['Test RMSE'] = fifth_l
df_without_standardization['Number of features'] = f_list

```

```

[34]: df_k_nearest = df_without_standardization.copy()
df_without_standardization

```

```

[34]:
Correlation threshold  Training data R^2 score  Test data R^2 score \
0                    0.33                0.608638        -0.586847
1                    0.34                0.609763        -0.586847
2                    0.35                0.617607        -0.786457
3                    0.36                0.636317        -0.782164
4                    0.37                0.629161        -0.781532
5                    0.38                0.720982         0.252254
6                    0.39                0.715501         0.252254

```

|    |      |          |           |
|----|------|----------|-----------|
| 7  | 0.40 | 0.710436 | 0.252254  |
| 8  | 0.41 | 0.698984 | 0.253543  |
| 9  | 0.42 | 0.617632 | -0.270316 |
| 10 | 0.43 | 0.568566 | -0.753812 |
| 11 | 0.44 | 0.568547 | -0.753812 |
| 12 | 0.45 | 0.565701 | -0.753812 |
| 13 | 0.46 | 0.569946 | -0.715307 |
| 14 | 0.47 | 0.569946 | -0.715307 |
| 15 | 0.48 | 0.569946 | -0.713488 |
| 16 | 0.49 | 0.554510 | -0.565701 |
| 17 | 0.50 | 0.537327 | -0.557452 |
| 18 | 0.51 | 0.537327 | -0.557452 |

|    | Training RMSE | Test RMSE | Number of features |
|----|---------------|-----------|--------------------|
| 0  | 0.606162      | 0.855432  | 84                 |
| 1  | 0.605289      | 0.855432  | 74                 |
| 2  | 0.599175      | 0.859838  | 61                 |
| 3  | 0.584333      | 0.860664  | 50                 |
| 4  | 0.590055      | 0.860929  | 43                 |
| 5  | 0.511818      | 0.703466  | 37                 |
| 6  | 0.516821      | 0.703466  | 29                 |
| 7  | 0.521400      | 0.703466  | 26                 |
| 8  | 0.531611      | 0.709066  | 25                 |
| 9  | 0.599156      | 0.813708  | 19                 |
| 10 | 0.636438      | 0.831269  | 14                 |
| 11 | 0.636453      | 0.831269  | 13                 |
| 12 | 0.638548      | 0.831269  | 11                 |
| 13 | 0.635420      | 0.812343  | 10                 |
| 14 | 0.635420      | 0.812343  | 9                  |
| 15 | 0.635420      | 0.812281  | 8                  |
| 16 | 0.646723      | 0.780072  | 6                  |
| 17 | 0.659077      | 0.781489  | 4                  |
| 18 | 0.659077      | 0.781489  | 4                  |

## 4.2 Plots

```
[35]: plt.plot(df_without_standardization['Correlation threshold'],
             df_without_standardization['Training data R^2 score'], label = "Training
             data R^2 score", marker='v')
plt.plot(df_without_standardization['Correlation threshold'],
             df_without_standardization['Test data R^2 score'], label = "Test data R^2
             score", marker='D')
plt.legend()
plt.xlabel('Correlation threshold')
plt.ylabel('R^2 score')
plt.ylim([0, 1])
plt.show()
```

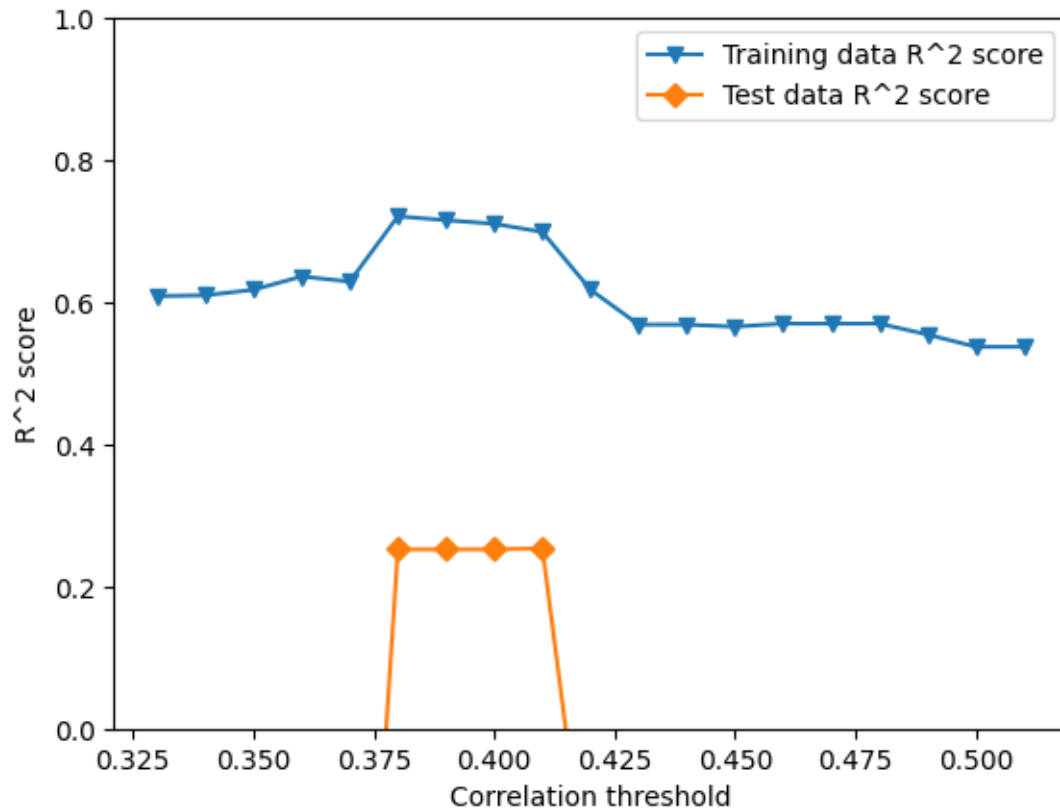

```
[36]: plt.plot(df_without_standardization['Correlation threshold'],  
             df_without_standardization['Number of features'], label = "Number of  
             features", marker='.')  
plt.legend()  
plt.xlabel('Correlation threshold')  
plt.ylabel('Number of features')  
plt.show()
```



[ ]:

## 5 Support Vector Machines (SVM)

```
[37]: without_standardization, train_r2_, test_r2_, hist1, hist2, target_column_name,
      ↪ training_data_RMSE, test_data_RMSE = pred_model.
      ↪ prepare_data_and_create_model(molecular_descriptors_df=data,
      ↪
      ↪         correlation_threshold=0.50,
      ↪
      ↪         standardization=False,
      ↪
      ↪         model_type='SVR',
      ↪
      ↪         kernel_ = 'linear',
      ↪
      ↪         gamma_ = 'auto',
      ↪
      ↪         target_column_name = target,
```

```

↪          random_state=random_state,
↪          train_test_split_=True,
↪          verbose=True)

```

I am not doing standardization...

|   | molecular descriptor name |  |
|---|---------------------------|--|
| 0 | AATSOZ                    |  |
| 1 | AATSOare                  |  |
| 2 | AATSOd                    |  |
| 3 | AATSOdv                   |  |
| 4 | AATSOi                    |  |

  

|   | molecular descriptor name | corr_value |
|---|---------------------------|------------|
| 0 | AATSOZ                    | -0.038502  |
| 1 | AATSOare                  | -0.120847  |
| 2 | AATSOd                    | 0.041648   |
| 3 | AATSOdv                   | -0.115899  |
| 4 | AATSOi                    | 0.191765   |

  

|   | molecular descriptor name | corr_value | absolute correlation value |
|---|---------------------------|------------|----------------------------|
| 0 | AATSOZ                    | -0.038502  | 0.038502                   |
| 1 | AATSOare                  | -0.120847  | 0.120847                   |
| 2 | AATSOd                    | 0.041648   | 0.041648                   |
| 3 | AATSOdv                   | -0.115899  | 0.115899                   |
| 4 | AATSOi                    | 0.191765   | 0.191765                   |

  

|      | molecular descriptor name | corr_value | absolute correlation value |
|------|---------------------------|------------|----------------------------|
| 226  | AMID_0                    | -0.520578  | 0.520578                   |
| 505  | EState_VSA5               | -0.578904  | 0.578904                   |
| 506  | EState_VSA6               | 0.519794   | 0.519794                   |
| 791  | MDEO-12                   | -0.525441  | 0.525441                   |
| 1211 | MCF-7                     | 1.000000   | 1.000000                   |

  

|     | molecular descriptor name | corr_value | absolute correlation value |
|-----|---------------------------|------------|----------------------------|
| 226 | AMID_0                    | -0.520578  | 0.520578                   |
| 505 | EState_VSA5               | -0.578904  | 0.578904                   |
| 506 | EState_VSA6               | 0.519794   | 0.519794                   |
| 791 | MDEO-12                   | -0.525441  | 0.525441                   |

The model used is: SVR...

Return the coefficient of determination of the prediction:

0.4743557839935354

R<sup>2</sup> score: 0.5020352037550295

Correlation coefficient: 0.7085444260983425

Test data - unseen during training:

R<sup>2</sup> score: 0.4743557839935354

Correlation coefficient: 0.6887349156195984

[7.96654481 6.82669237 7.83448445 7.03699901 7.89478809 7.40737585  
7.67935617 8.33257718 7.17327682 8.0339569 8.08511125 8.38190303

```
8.04334248 7.80748886 7.5192305 6.8313205 7.68209688 6.85506111]
113      8.022276
35       6.066513
101      6.920819
36       6.108463
100      7.376751
13       7.987163
0        7.987163
114      7.823909
104      8.397940
96       7.920819
40       8.091515
103      8.376751
48       7.886057
39       8.455932
14       8.086186
117      5.920819
21       8.113509
9        6.143150
```

Name: MCF-7, dtype: float64

Training Root Mean Square Error: 0.6837518281038438

Testing Root Mean Square Error: 0.625265232017053

```
[38]: print(target_column_name+str('_transformed'))
      print(hist1[target_column_name].hist())
```

MCF-7\_transformed

AxesSubplot(0.125,0.11;0.775x0.77)





```
[39]: with_standardization, train_r2_, test_r2_, hist1, hist2, target_column_name,
      ↪ training_data_RMSE, test_data_RMSE = pred_model.
      ↪ prepare_data_and_create_model(molecular_descriptors_df=data,
      ↪
      ↪         correlation_threshold=0.50,
      ↪
      ↪         standardization=True,
      ↪
      ↪         model_type='SVR',
      ↪
      ↪         kernel_ = 'linear',
      ↪
      ↪         gamma_ = 'auto',
      ↪
      ↪         target_column_name = target,
      ↪
      ↪         random_state=random_state,
      ↪
      ↪         train_test_split_=True,
      ↪
      ↪         verbose=True)
```

I am doing standardization...

molecular descriptor name

|   |          |
|---|----------|
| 0 | AATSOZ   |
| 1 | AATSOare |
| 2 | AATSOd   |
| 3 | AATSOdv  |
| 4 | AATSOi   |

|   | molecular descriptor name | corr_value |
|---|---------------------------|------------|
| 0 | AATSOZ                    | -0.038502  |
| 1 | AATSOare                  | -0.120847  |
| 2 | AATSOd                    | 0.041648   |
| 3 | AATSOdv                   | -0.115899  |
| 4 | AATSOi                    | 0.191765   |

|   | molecular descriptor name | corr_value | absolute correlation value |
|---|---------------------------|------------|----------------------------|
| 0 | AATSOZ                    | -0.038502  | 0.038502                   |
| 1 | AATSOare                  | -0.120847  | 0.120847                   |
| 2 | AATSOd                    | 0.041648   | 0.041648                   |
| 3 | AATSOdv                   | -0.115899  | 0.115899                   |
| 4 | AATSOi                    | 0.191765   | 0.191765                   |

|      | molecular descriptor name | corr_value | absolute correlation value |
|------|---------------------------|------------|----------------------------|
| 226  | AMID_0                    | -0.520578  | 0.520578                   |
| 505  | EState_VSA5               | -0.578904  | 0.578904                   |
| 506  | EState_VSA6               | 0.519794   | 0.519794                   |
| 791  | MDEO-12                   | -0.525441  | 0.525441                   |
| 1211 | MCF-7                     | 1.000000   | 1.000000                   |

|     | molecular descriptor name | corr_value | absolute correlation value |
|-----|---------------------------|------------|----------------------------|
| 226 | AMID_0                    | -0.520578  | 0.520578                   |
| 505 | EState_VSA5               | -0.578904  | 0.578904                   |
| 506 | EState_VSA6               | 0.519794   | 0.519794                   |
| 791 | MDEO-12                   | -0.525441  | 0.525441                   |

The model used is: SVR...

Return the coefficient of determination of the prediction:

0.4743557839935354

R<sup>2</sup> score: 0.5020352037550295

Correlation coefficient: 0.7085444260983425

Test data - unseen during training:

R<sup>2</sup> score: 0.4743557839935354

Correlation coefficient: 0.6887349156195984

[7.96654481 6.82669237 7.83448445 7.03699901 7.89478809 7.40737585

7.67935617 8.33257718 7.17327682 8.0339569 8.08511125 8.38190303

8.04334248 7.80748886 7.5192305 6.8313205 7.68209688 6.85506111]

113 8.022276

35 6.066513

101 6.920819

36 6.108463

100 7.376751

13 7.987163

0 7.987163

Testing Root Mean Square Error: 0.625265232017053

```

    verbose = False)
    second_list.append(train_r2)
    third_list.append(test_r2)
    fourth_l.append(training_data_RMSE)
    fifth_l.append(test_data_RMSE)
    f_list.append(len(h_))

```

```

[41]: df_without_standardization = pd.DataFrame(data=first_list,
    ↪columns=["Correlation threshold"])
df_without_standardization['Training data R^2 score'] = second_list
df_without_standardization['Test data R^2 score'] = third_list
df_without_standardization['Training RMSE'] = fourth_l
df_without_standardization['Test RMSE'] = fifth_l
df_without_standardization['Number of features'] = f_list

```

```

[42]: df_svm = df_without_standardization.copy()
df_without_standardization

```

```

[42]:
Correlation threshold  Training data R^2 score  Test data R^2 score \
0                    0.33                    0.784206          -0.273797
1                    0.34                    0.784504          -0.307622
2                    0.35                    0.761037          -0.433487
3                    0.36                    0.670546          -1.413869
4                    0.37                    0.668193          -1.200970
5                    0.38                    0.647471          -0.489896
6                    0.39                    0.629387          -0.710704
7                    0.40                    0.632083          -0.934216
8                    0.41                    0.614130          -0.474560
9                    0.42                    0.594259          -0.593504
10                   0.43                    0.580193          -1.003881
11                   0.44                    0.579996          -1.009983
12                   0.45                    0.580285          -0.976854
13                   0.46                    0.540404          -0.970051
14                   0.47                    0.540529          -0.979198
15                   0.48                    0.528432          -0.281578
16                   0.49                    0.525676          -0.251255
17                   0.50                    0.502035          -0.611223
18                   0.51                    0.502035          -0.611223

```

```

Training RMSE  Test RMSE  Number of features
0      0.450111   0.856825                84
1      0.449799   0.857894                74
2      0.473658   0.935439                61
3      0.556156   0.879485                50
4      0.558139   0.848670                43
5      0.575303   0.757383                37

```

|    |          |          |    |
|----|----------|----------|----|
| 6  | 0.589874 | 0.776040 | 29 |
| 7  | 0.587725 | 0.806620 | 26 |
| 8  | 0.601893 | 0.739541 | 25 |
| 9  | 0.617197 | 0.707240 | 19 |
| 10 | 0.627804 | 0.745903 | 14 |
| 11 | 0.627951 | 0.746802 | 13 |
| 12 | 0.627735 | 0.739018 | 11 |
| 13 | 0.656882 | 0.679106 | 10 |
| 14 | 0.656793 | 0.678748 | 9  |
| 15 | 0.665383 | 0.591511 | 8  |
| 16 | 0.667324 | 0.595829 | 6  |
| 17 | 0.683752 | 0.625265 | 4  |
| 18 | 0.683752 | 0.625265 | 4  |

## 5.2 Plots

```
[43]: plt.plot(df_without_standardization['Correlation threshold'],
             df_without_standardization['Training data R^2 score'], label = "Training
             data R^2 score", marker='v')
plt.plot(df_without_standardization['Correlation threshold'],
             df_without_standardization['Test data R^2 score'], label = "Test data R^2
             score", marker='D')
plt.legend()
plt.xlabel('Correlation threshold')
plt.ylabel('R^2 score')
plt.ylim([0, 1])
plt.show()
```

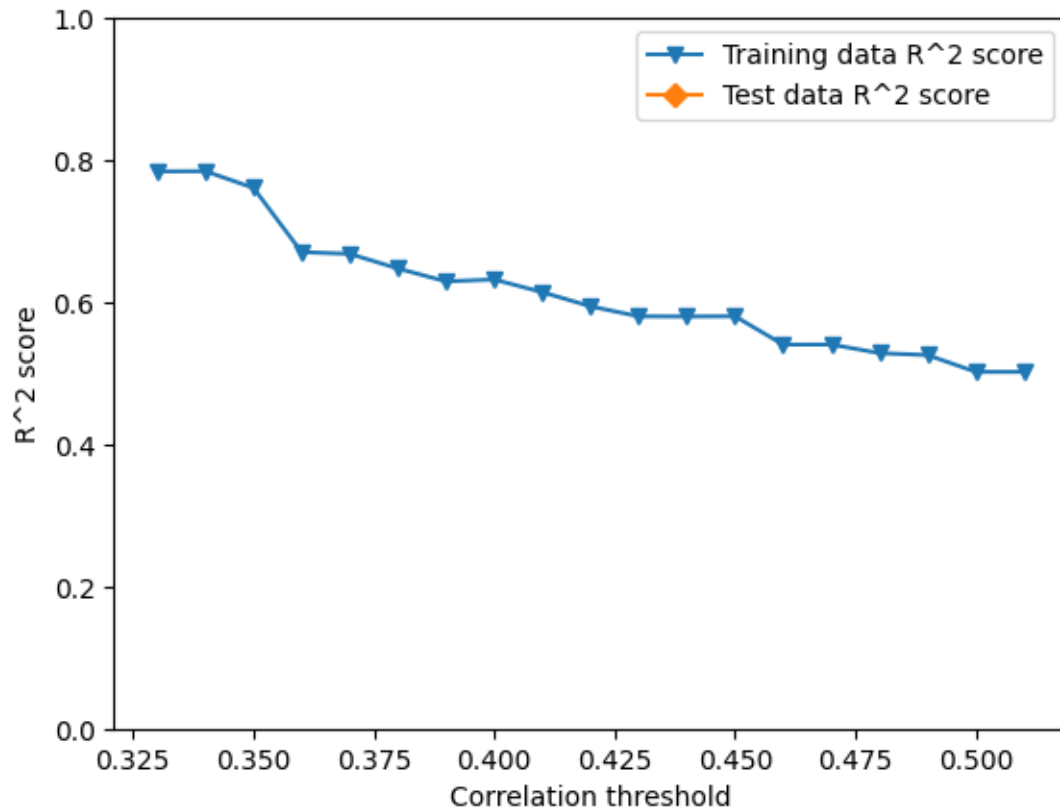

```
[44]: plt.plot(df_without_standardization['Correlation threshold'],  
             df_without_standardization['Number of features'], label = "Number of  
             features", marker='.')  
plt.legend()  
plt.xlabel('Correlation threshold')  
plt.ylabel('Number of features')  
plt.show()
```

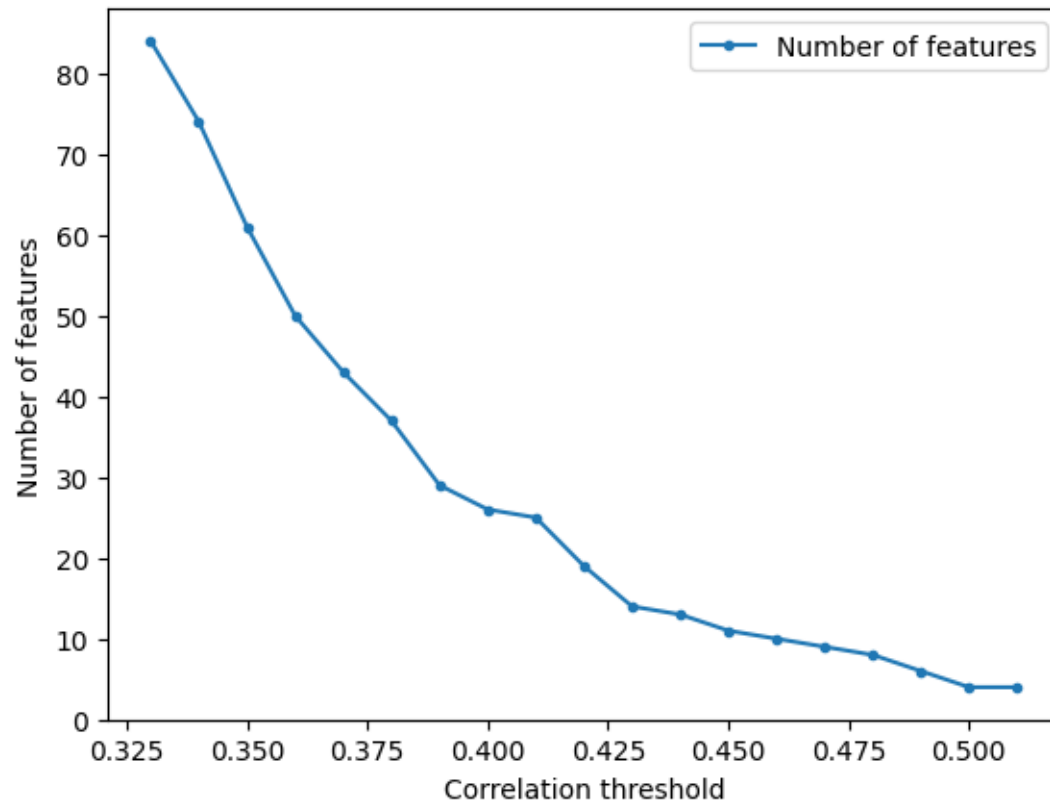

### 5.3 Store quality measurements

```
[45]: with pd.ExcelWriter('../Data/Quality_'+str(target)+'_'+str(random_state)+'_'.  
      ↪ 'xlsx') as writer:  
      df_linear.to_excel(writer, sheet_name='MLR')  
      df_decision_tree.to_excel(writer, sheet_name='DT')  
      df_random_forest.to_excel(writer, sheet_name='RF')  
      df_k_nearest.to_excel(writer, sheet_name='KNN')  
      df_svm.to_excel(writer, sheet_name='SVM')
```

# Notebook

January 18, 2024

## 1 File 29

```
[1]: import sys
from pathlib import Path
prediction_mode_path = Path("../module")
sys.path.append(prediction_mode_path.as_posix())
import models_creation as pred_model

import pandas as pd
import numpy as np

from sklearn.metrics import r2_score

import matplotlib.pyplot as plt
from sklearn.tree import plot_tree

from matplotlib import pyplot as plt

import joblib

import warnings
warnings.filterwarnings('ignore')
```

```
[2]: load_prepared_data = pd.read_excel('../Data/Kolchicyna_machine_learning.xlsx')
load_prepared_data = load_prepared_data.drop(columns=['Unnamed: 0'])

target = 'MCF-7'

corr_low = 0.33
corr_high = 0.525

random_state = 42
```

```
[3]: load_prepared_data.head()
```

```
[3]:      AATSOZ  AATSOare  AATSOd  AATSOdv  AATSOi  AATSOm  AATSOp  \
0  25.090909  6.046518  3.109091  6.662626  160.775045  99.075564  1.555512
1  24.448276  6.008422  3.051724  6.386973  161.021674  96.473315  1.538471
```



|   |           |          |          |          |            |           |          |
|---|-----------|----------|----------|----------|------------|-----------|----------|
| 2 | 23.868852 | 5.974074 | 3.000000 | 6.138434 | 161.244045 | 94.127025 | 1.523105 |
| 3 | 23.868852 | 5.974074 | 3.032787 | 6.171220 | 161.244045 | 94.127025 | 1.523105 |
| 4 | 23.343750 | 5.942945 | 2.953125 | 5.913194 | 161.445569 | 92.000700 | 1.509180 |

|   | AATS0pe  | AATS0s   | AATS0se  | ... | A549_float | MCF-7_float | LoVo_float | \ |
|---|----------|----------|----------|-----|------------|-------------|------------|---|
| 0 | 6.126680 | 3.435416 | 7.629859 | ... | 10.8       | 10.3        | 6.5        |   |
| 1 | 6.088791 | 3.330998 | 7.596891 | ... | 11.6       | 12.0        | 8.5        |   |
| 2 | 6.054630 | 3.236850 | 7.567166 | ... | 10.9       | 12.2        | 8.8        |   |
| 3 | 6.054630 | 3.257798 | 7.567166 | ... | 10.5       | 11.3        | 8.5        |   |
| 4 | 6.023670 | 3.151529 | 7.540228 | ... | 89.5       | 92.7        | 52.8       |   |

|   | LoVo/DX_float | BALB/3T3_float | A549_float_transformed | \ |
|---|---------------|----------------|------------------------|---|
| 0 | 54.9          | 10.2           | 7.966576               |   |
| 1 | 31.1          | 14.3           | 7.935542               |   |
| 2 | 17.9          | 11.7           | 7.962574               |   |
| 3 | 10.2          | 11.0           | 7.978811               |   |
| 4 | 77.8          | 99.4           | 7.048177               |   |

|   | MCF-7_float_transformed | LoVo_float_transformed | LoVo/DX_float_transformed | \ |
|---|-------------------------|------------------------|---------------------------|---|
| 0 | 7.987163                | 8.187087               | 7.260428                  |   |
| 1 | 7.920819                | 8.070581               | 7.507240                  |   |
| 2 | 7.913640                | 8.055517               | 7.747147                  |   |
| 3 | 7.946922                | 8.070581               | 7.991400                  |   |
| 4 | 7.032920                | 7.277366               | 7.109020                  |   |

|   | BALB/3T3_float_transformed |
|---|----------------------------|
| 0 | 7.991400                   |
| 1 | 7.844664                   |
| 2 | 7.931814                   |
| 3 | 7.958607                   |
| 4 | 7.002614                   |

[5 rows x 1221 columns]

```
[4]: data = load_prepared_data[list(load_prepared_data.columns)[0:-10]]
data[target] = load_prepared_data[load_prepared_data.columns[-4]]
data.head()
```

|   | AATS0Z    | AATS0are | AATS0d   | AATS0dv  | AATS0i     | AATS0m    | AATS0p   | \ |
|---|-----------|----------|----------|----------|------------|-----------|----------|---|
| 0 | 25.090909 | 6.046518 | 3.109091 | 6.662626 | 160.775045 | 99.075564 | 1.555512 |   |
| 1 | 24.448276 | 6.008422 | 3.051724 | 6.386973 | 161.021674 | 96.473315 | 1.538471 |   |
| 2 | 23.868852 | 5.974074 | 3.000000 | 6.138434 | 161.244045 | 94.127025 | 1.523105 |   |
| 3 | 23.868852 | 5.974074 | 3.032787 | 6.171220 | 161.244045 | 94.127025 | 1.523105 |   |
| 4 | 23.343750 | 5.942945 | 2.953125 | 5.913194 | 161.445569 | 92.000700 | 1.509180 |   |

|   | AATS0pe  | AATS0s   | AATS0se  | ... | piPC10   | piPC2    | piPC3    | piPC4    | \ |
|---|----------|----------|----------|-----|----------|----------|----------|----------|---|
| 0 | 6.126680 | 3.435416 | 7.629859 | ... | 7.999655 | 4.266195 | 4.915408 | 5.516700 |   |

|   |          |          |          |     |          |          |          |          |
|---|----------|----------|----------|-----|----------|----------|----------|----------|
| 1 | 6.088791 | 3.330998 | 7.596891 | ... | 8.018726 | 4.280132 | 4.922714 | 5.520711 |
| 2 | 6.054630 | 3.236850 | 7.567166 | ... | 8.028799 | 4.293878 | 4.929967 | 5.524706 |
| 3 | 6.054630 | 3.257798 | 7.567166 | ... | 8.037440 | 4.307438 | 4.929967 | 5.524706 |
| 4 | 6.023670 | 3.151529 | 7.540228 | ... | 8.034892 | 4.307438 | 4.937168 | 5.528685 |

|   | piPC5    | piPC6    | piPC7    | piPC8    | piPC9    | MCF-7    |
|---|----------|----------|----------|----------|----------|----------|
| 0 | 6.098566 | 6.595759 | 6.979116 | 7.337313 | 7.681445 | 7.987163 |
| 1 | 6.103048 | 6.601209 | 6.985613 | 7.349442 | 7.695531 | 7.920819 |
| 2 | 6.105281 | 6.603923 | 6.989306 | 7.353932 | 7.704023 | 7.913640 |
| 3 | 6.107510 | 6.606629 | 6.992068 | 7.361425 | 7.709420 | 7.946922 |
| 4 | 6.107510 | 6.605277 | 6.991148 | 7.356489 | 7.707175 | 7.032920 |

[5 rows x 1212 columns]

## 2 Multiple Linear regression (MLR)

```
[5]: without_standardization, train_r2_, test_r2_, hist1, hist2, target_column_name,
      ↪ training_data_RMSE, test_data_RMSE = pred_model.
      ↪ prepare_data_and_create_model(molecular_descriptors_df=data,
      ↪
      ↪ correlation_threshold=0.5,
      ↪
      ↪ standardization=False,
      ↪
      ↪ model_type='linear_model',
      ↪
      ↪ target_column_name = str(target),
      ↪
      ↪ random_state=random_state,
      ↪
      ↪ train_test_split_=True,
      ↪
      ↪ verbose=True)
```

I am not doing standardization...

|   | molecular descriptor name |            |
|---|---------------------------|------------|
| 0 | AATS0Z                    |            |
| 1 | AATS0are                  |            |
| 2 | AATS0d                    |            |
| 3 | AATS0dv                   |            |
| 4 | AATS0i                    |            |
|   | molecular descriptor name | corr_value |
| 0 | AATS0Z                    | -0.038502  |
| 1 | AATS0are                  | -0.120847  |
| 2 | AATS0d                    | 0.041648   |
| 3 | AATS0dv                   | -0.115899  |

|      |                           |            |                            |
|------|---------------------------|------------|----------------------------|
| 4    | AATSOi                    | 0.191765   |                            |
|      | molecular descriptor name | corr_value | absolute correlation value |
| 0    | AATSOZ                    | -0.038502  | 0.038502                   |
| 1    | AATSOare                  | -0.120847  | 0.120847                   |
| 2    | AATSOd                    | 0.041648   | 0.041648                   |
| 3    | AATSOdv                   | -0.115899  | 0.115899                   |
| 4    | AATSOi                    | 0.191765   | 0.191765                   |
|      | molecular descriptor name | corr_value | absolute correlation value |
| 226  | AMID_0                    | -0.520578  | 0.520578                   |
| 505  | EState_VSA5               | -0.578904  | 0.578904                   |
| 506  | EState_VSA6               | 0.519794   | 0.519794                   |
| 791  | MDEO-12                   | -0.525441  | 0.525441                   |
| 1211 | MCF-7                     | 1.000000   | 1.000000                   |
|      | molecular descriptor name | corr_value | absolute correlation value |
| 226  | AMID_0                    | -0.520578  | 0.520578                   |
| 505  | EState_VSA5               | -0.578904  | 0.578904                   |
| 506  | EState_VSA6               | 0.519794   | 0.519794                   |
| 791  | MDEO-12                   | -0.525441  | 0.525441                   |

The model used is: LinearReg..

Return the coefficient of determination of the prediction:

0.383792023626658

R<sup>2</sup> score: 0.5417842357199687

Correlation coefficient: 0.7360599403037559

Test data - unseen during training:

R<sup>2</sup> score: 0.383792023626658

Correlation coefficient: 0.619509502450655

[7.87972672 8.17008106 7.28223576 7.52208649 5.90557033 8.51256076  
8.81684659 7.51552279 8.05723629 8.23684872 7.4774442 6.85294947  
7.90367018 6.81630238 7.19449679 7.87971906 8.04668352 7.58172269]

44 8.267606  
47 8.065502  
4 7.032920  
55 7.920819  
26 4.998569  
64 8.619789  
73 7.920819  
10 7.987163  
40 8.091515  
107 7.795880  
18 7.074688  
62 8.958607  
11 8.013228  
36 6.108463  
89 8.045757  
91 9.154902  
109 8.086186  
0 7.987163

Name: MCF-7, dtype: float64

Training Root Mean Square Error: 0.6431444619819195  
Testing Root Mean Square Error: 0.7477130559497913

```
[6]: print(target_column_name+str('_transformed'))  
     print(hist1[target_column_name].hist())
```

MCF-7\_transformed  
AxesSubplot(0.125,0.11;0.775x0.77)

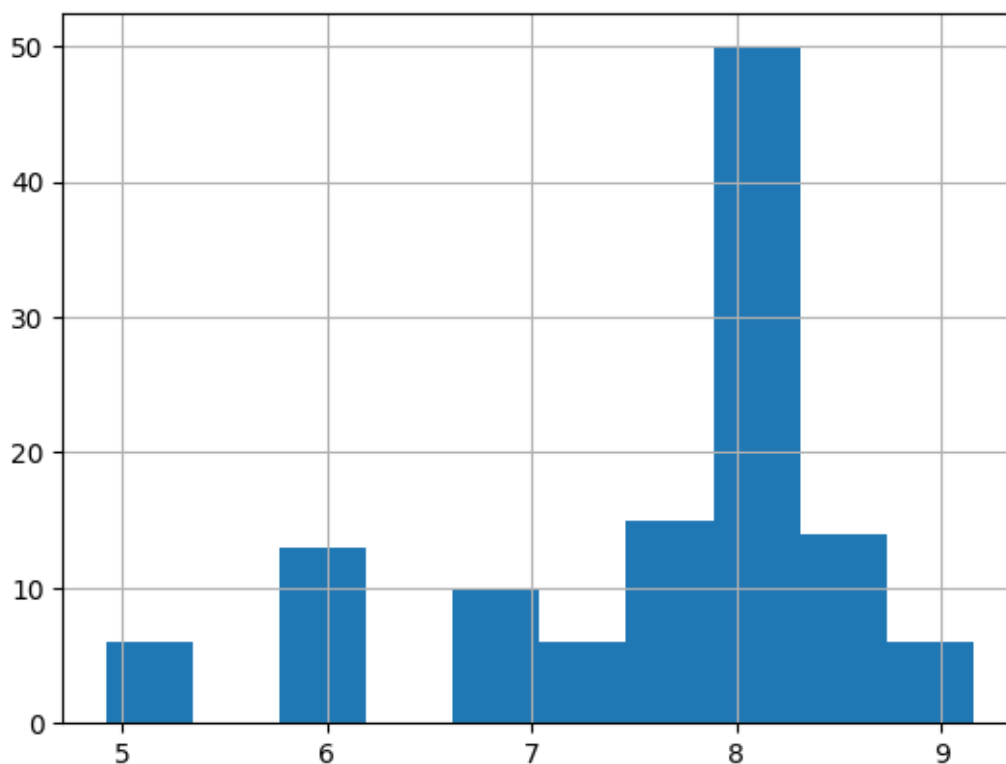

```
[7]: with_standardization, train_r2_, test_r2_, hist1, hist2, target_column_name,   
     ↪ training_data_RMSE, test_data_RMSE = pred_model.  
     ↪ prepare_data_and_create_model(molecular_descriptors_df=data,  
  
     ↪             correlation_threshold=0.50,  
  
     ↪             standardization=True,  
  
     ↪             model_type='linear_model',  
  
     ↪             target_column_name = target,  
  
     ↪             random_state=random_state,
```

```

↪          train_test_split_=True,
↪          verbose=True)

```

I am doing standardization...

|   | molecular descriptor name | corr_value | absolute correlation value |
|---|---------------------------|------------|----------------------------|
| 0 | AATSOZ                    | -0.038502  | 0.038502                   |
| 1 | AATSOare                  | -0.120847  | 0.120847                   |
| 2 | AATSOd                    | 0.041648   | 0.041648                   |
| 3 | AATSOdv                   | -0.115899  | 0.115899                   |
| 4 | AATSOi                    | 0.191765   | 0.191765                   |

  

|   | molecular descriptor name | corr_value | absolute correlation value |
|---|---------------------------|------------|----------------------------|
| 0 | AATSOZ                    | -0.038502  | 0.038502                   |
| 1 | AATSOare                  | -0.120847  | 0.120847                   |
| 2 | AATSOd                    | 0.041648   | 0.041648                   |
| 3 | AATSOdv                   | -0.115899  | 0.115899                   |
| 4 | AATSOi                    | 0.191765   | 0.191765                   |

  

|      | molecular descriptor name | corr_value | absolute correlation value |
|------|---------------------------|------------|----------------------------|
| 226  | AMID_0                    | -0.520578  | 0.520578                   |
| 505  | EState_VSA5               | -0.578904  | 0.578904                   |
| 506  | EState_VSA6               | 0.519794   | 0.519794                   |
| 791  | MDEO-12                   | -0.525441  | 0.525441                   |
| 1211 | MCF-7                     | 1.000000   | 1.000000                   |

  

|     | molecular descriptor name | corr_value | absolute correlation value |
|-----|---------------------------|------------|----------------------------|
| 226 | AMID_0                    | -0.520578  | 0.520578                   |
| 505 | EState_VSA5               | -0.578904  | 0.578904                   |
| 506 | EState_VSA6               | 0.519794   | 0.519794                   |
| 791 | MDEO-12                   | -0.525441  | 0.525441                   |

The model used is: LinearReg..

Return the coefficient of determination of the prediction:

0.383792023626658

R<sup>2</sup> score: 0.5417842357199687

Correlation coefficient: 0.7360599403037559

Test data - unseen during training:

R<sup>2</sup> score: 0.383792023626658

Correlation coefficient: 0.619509502450655

[7.87972672 8.17008106 7.28223576 7.52208649 5.90557033 8.51256076  
8.81684659 7.51552279 8.05723629 8.23684872 7.4774442 6.85294947  
7.90367018 6.81630238 7.19449679 7.87971906 8.04668352 7.58172269]

44 8.267606

47 8.065502

```

4      7.032920
55     7.920819
26     4.998569
64     8.619789
73     7.920819
10     7.987163
40     8.091515
107    7.795880
18     7.074688
62     8.958607
11     8.013228
36     6.108463
89     8.045757
91     9.154902
109    8.086186
0      7.987163

```

Name: MCF-7, dtype: float64

Training Root Mean Square Error: 0.6431444619819195

Testing Root Mean Square Error: 0.7477130559497913

## 2.1 Search inside correlation space

```

[8]: step = 0.01
initial_step = corr_low
last_step = corr_high
first_list = [x / 100.0 for x in range(int(initial_step*100),
    ↪int(last_step*100), int(step*100))]
second_list = []
third_list = []
fourth_l = []
fifth_l = []
f_list = []
for i in first_list:
    without_standardization, train_r2, test_r2, _, h_, target_column_name,
    ↪training_data_RMSE, test_data_RMSE = pred_model.
    ↪prepare_data_and_create_model(molecular_descriptors_df = data,

    ↪                                correlation_threshold = i,

    ↪                                standardization = False,

    ↪                                model_type = 'linear_model',

    ↪                                target_column_name = target,

    ↪                                random_state=random_state,

```

```

    train_test_split_ = True,

    verbose = False)
second_list.append(train_r2)
third_list.append(test_r2)
fourth_l.append(training_data_RMSE)
fifth_l.append(test_data_RMSE)
f_list.append(len(h_))

```

```

[9]: df_without_standardization = pd.DataFrame(data=first_list,
    columns=["Correlation threshold"])
df_without_standardization['Training data R^2 score'] = second_list
df_without_standardization['Test data R^2 score'] = third_list
df_without_standardization['Training RMSE'] = fourth_l
df_without_standardization['Test RMSE'] = fifth_l
df_without_standardization['Number of features'] = f_list

```

```

[10]: df_linear = df_without_standardization.copy()
df_without_standardization

```

```

[10]:
Correlation threshold  Training data R^2 score  Test data R^2 score \
0                    0.33                0.972334          -3.223339
1                    0.34                0.952769          -1.218524
2                    0.35                0.916550          -2.014334
3                    0.36                0.872997           0.302088
4                    0.37                0.798351           0.699391
5                    0.38                0.781694           0.659297
6                    0.39                0.720369           0.377002
7                    0.40                0.709253           0.036152
8                    0.41                0.707612           0.102063
9                    0.42                0.663994           0.440694
10                   0.43                0.593379           0.374782
11                   0.44                0.593227           0.385626
12                   0.45                0.583763           0.449877
13                   0.46                0.577016           0.379662
14                   0.47                0.569403           0.403736
15                   0.48                0.567419           0.364270
16                   0.49                0.564575           0.344717
17                   0.50                0.541784           0.383792
18                   0.51                0.541784           0.383792

Training RMSE  Test RMSE  Number of features
0          0.158033    1.957489             84
1          0.206484    1.418742             74
2          0.274465    1.653739             61
3          0.338595    0.795741             50

```

|    |          |          |    |
|----|----------|----------|----|
| 4  | 0.426649 | 0.522243 | 43 |
| 5  | 0.443922 | 0.555980 | 37 |
| 6  | 0.502419 | 0.751821 | 29 |
| 7  | 0.512308 | 0.935138 | 26 |
| 8  | 0.513752 | 0.902598 | 25 |
| 9  | 0.550741 | 0.712354 | 19 |
| 10 | 0.605855 | 0.753160 | 14 |
| 11 | 0.605968 | 0.746599 | 13 |
| 12 | 0.612977 | 0.706482 | 11 |
| 13 | 0.617925 | 0.750215 | 10 |
| 14 | 0.623460 | 0.735513 | 9  |
| 15 | 0.624895 | 0.759465 | 8  |
| 16 | 0.626946 | 0.771056 | 6  |
| 17 | 0.643144 | 0.747713 | 4  |
| 18 | 0.643144 | 0.747713 | 4  |

[ ]:

## 2.2 Plots

```
[11]: plt.plot(df_without_standardization['Correlation threshold'],
↳df_without_standardization['Training data R^2 score'], label = "Training_
↳data R^2 score", marker='v')
plt.plot(df_without_standardization['Correlation threshold'],
↳df_without_standardization['Test data R^2 score'], label = "Test data R^2_
↳score", marker='D')
plt.legend()
plt.xlabel('Correlation threshold')
plt.ylabel('R^2 score')
plt.ylim([0, 1])
plt.show()
```



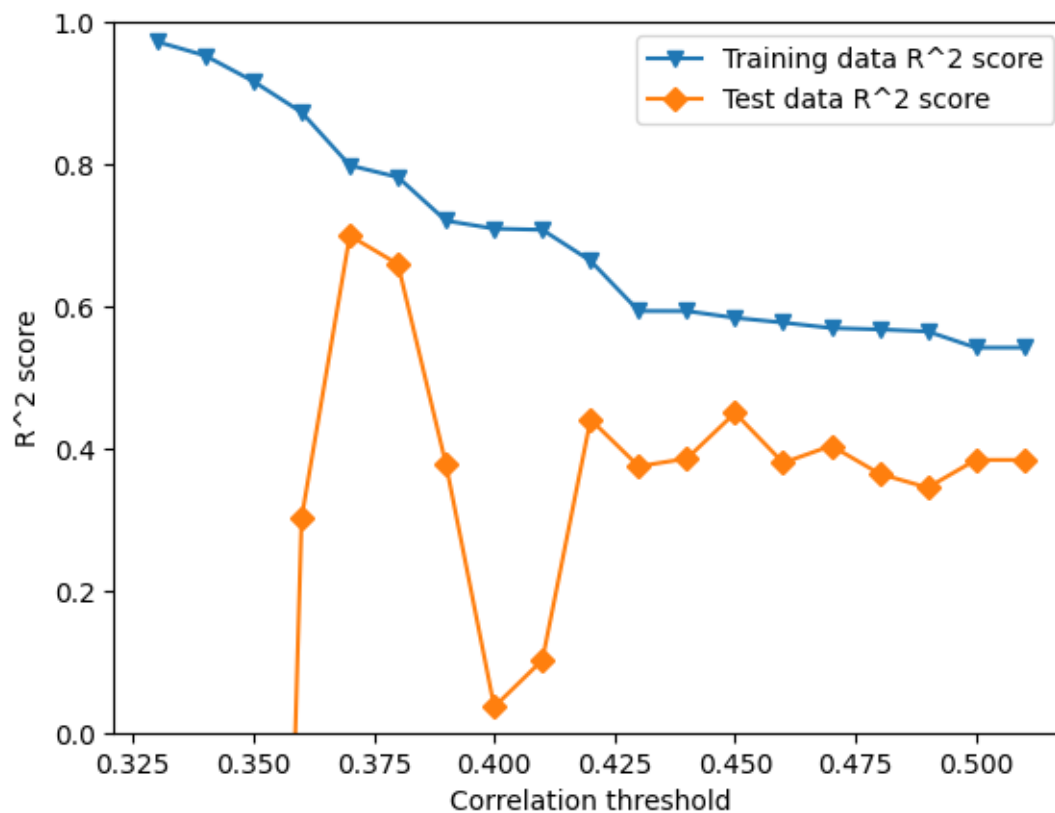

```
[12]: plt.plot(df_without_standardization['Correlation threshold'],  
             df_without_standardization['Number of features'], label = "Number of  
             features", marker='.')  
plt.legend()  
plt.xlabel('Correlation threshold')  
plt.ylabel('Number of features')  
plt.show()
```

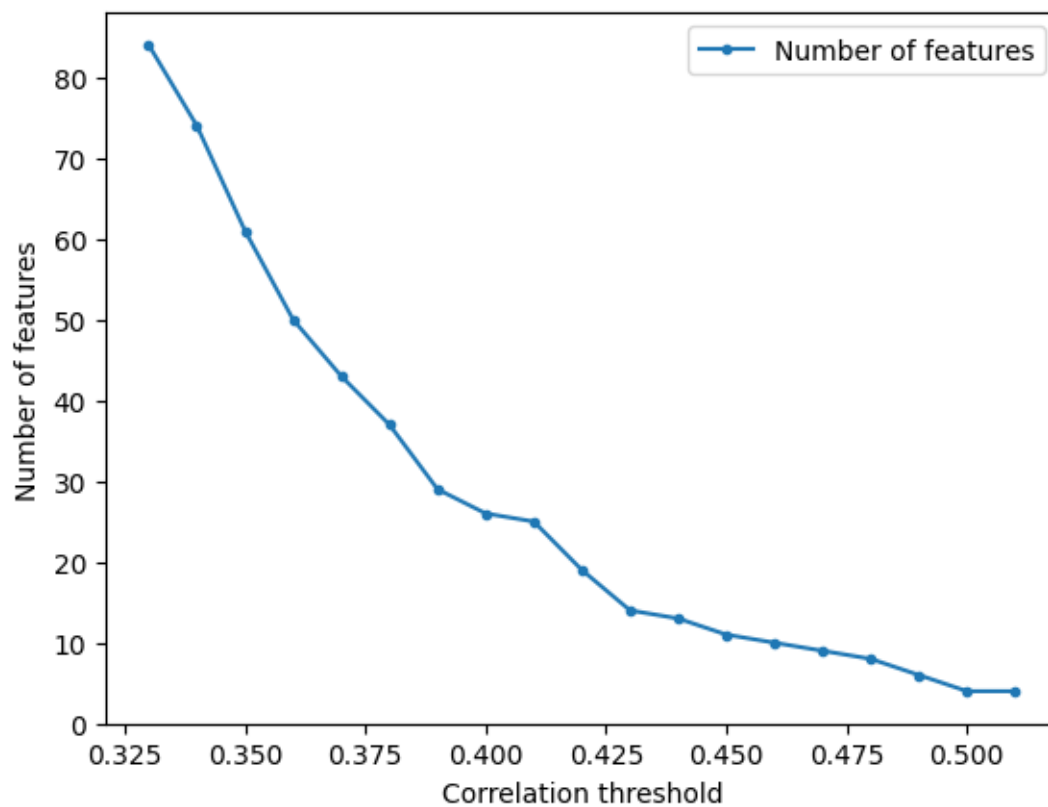

[ ]:

## 2.3 Decision Tree

```
[13]: without_standardization, train_r2_, test_r2_, hist1, hist2, target_column_name,
      ↪ training_data_RMSE, test_data_RMSE = pred_model.
      ↪ prepare_data_and_create_model(molecular_descriptors_df=data,
      ↪
      ↪ correlation_threshold=0.50,
      ↪
      ↪ standardization=False,
      ↪
      ↪ model_type='DecisionTreeRegressor',
      ↪
      ↪ max_depth=5,
      ↪
      ↪ target_column_name = target,
      ↪
      ↪ random_state=random_state,
```

```

↪          train_test_split_=True,
↪          verbose=True)

```

I am not doing standardization...

```

molecular descriptor name
0          AATSOZ
1          AATSOare
2          AATSOd
3          AATSOdv
4          AATSOi
molecular descriptor name  corr_value
0          AATSOZ      -0.038502
1          AATSOare    -0.120847
2          AATSOd      0.041648
3          AATSOdv     -0.115899
4          AATSOi      0.191765
molecular descriptor name  corr_value  absolute correlation value
0          AATSOZ      -0.038502          0.038502
1          AATSOare    -0.120847          0.120847
2          AATSOd      0.041648          0.041648
3          AATSOdv     -0.115899          0.115899
4          AATSOi      0.191765          0.191765
molecular descriptor name  corr_value  absolute correlation value
226          AMID_0      -0.520578          0.520578
505          EState_VSA5  -0.578904          0.578904
506          EState_VSA6   0.519794          0.519794
791          MDEO-12     -0.525441          0.525441
1211         MCF-7       1.000000          1.000000
molecular descriptor name  corr_value  absolute correlation value
226          AMID_0      -0.520578          0.520578
505          EState_VSA5  -0.578904          0.578904
506          EState_VSA6   0.519794          0.519794
791          MDEO-12     -0.525441          0.525441
The model used is: DecisionTree...
Return the coefficient of determination of the prediction:
0.08565969682925101
R^2 score: 0.885567607231033
Correlation coefficient: 0.9410460175948002
Test data - unseen during training:
R^2 score: 0.08565969682925101
Correlation coefficient: 0.29267677876669856
[7.54525818 7.81436625 7.74958      5.67780021 5.08184454 8.08153751
 8.37723827 8.1007251  7.81436625 7.81436625 7.01472228 7.74958
 8.1007251  8.1007251  7.74958      7.54525818 7.81436625 8.1007251 ]
44      8.267606
47      8.065502

```

```
4      7.032920
55     7.920819
26     4.998569
64     8.619789
73     7.920819
10     7.987163
40     8.091515
107    7.795880
18     7.074688
62     8.958607
11     8.013228
36     6.108463
89     8.045757
91     9.154902
109    8.086186
0      7.987163
```

Name: MCF-7, dtype: float64

Training Root Mean Square Error: 0.3214015824224863

Testing Root Mean Square Error: 0.9108046473050505

```
[14]: print(target_column_name+str('_transformed'))
      print(hist1[target_column_name].hist())
```

MCF-7\_transformed

AxesSubplot(0.125,0.11;0.775x0.77)



```
[15]: with_standardization, train_r2_, test_r2_, hist1, hist2, target_column_name,
      ↪ training_data_RMSE, test_data_RMSE = pred_model.
      ↪ prepare_data_and_create_model(molecular_descriptors_df=data,
      ↪
      ↪         correlation_threshold=0.50,
      ↪
      ↪         standardization=True,
      ↪
      ↪         model_type='DecisionTreeRegressor',
      ↪
      ↪         max_depth=5,
      ↪
      ↪         target_column_name = target,
      ↪
      ↪         random_state=random_state,
      ↪
      ↪         train_test_split_=True,
      ↪
      ↪         verbose=True)
```

I am doing standardization...

|   | molecular descriptor name |  |
|---|---------------------------|--|
| 0 | AATSOZ                    |  |
| 1 | AATSOare                  |  |
| 2 | AATSOd                    |  |
| 3 | AATSOdv                   |  |
| 4 | AATSOi                    |  |

  

|   | molecular descriptor name | corr_value |
|---|---------------------------|------------|
| 0 | AATSOZ                    | -0.038502  |
| 1 | AATSOare                  | -0.120847  |
| 2 | AATSOd                    | 0.041648   |
| 3 | AATSOdv                   | -0.115899  |
| 4 | AATSOi                    | 0.191765   |

  

|   | molecular descriptor name | corr_value | absolute correlation value |
|---|---------------------------|------------|----------------------------|
| 0 | AATSOZ                    | -0.038502  | 0.038502                   |
| 1 | AATSOare                  | -0.120847  | 0.120847                   |
| 2 | AATSOd                    | 0.041648   | 0.041648                   |
| 3 | AATSOdv                   | -0.115899  | 0.115899                   |
| 4 | AATSOi                    | 0.191765   | 0.191765                   |

  

|     | molecular descriptor name | corr_value | absolute correlation value |
|-----|---------------------------|------------|----------------------------|
| 226 | AMID_0                    | -0.520578  | 0.520578                   |
| 505 | EState_VSA5               | -0.578904  | 0.578904                   |
| 506 | EState_VSA6               | 0.519794   | 0.519794                   |
| 791 | MDE0-12                   | -0.525441  | 0.525441                   |

|      |                           |            |                            |
|------|---------------------------|------------|----------------------------|
| 1211 | MCF-7                     | 1.000000   | 1.000000                   |
|      | molecular descriptor name | corr_value | absolute correlation value |
| 226  | AMID_0                    | -0.520578  | 0.520578                   |
| 505  | EState_VSA5               | -0.578904  | 0.578904                   |
| 506  | EState_VSA6               | 0.519794   | 0.519794                   |
| 791  | MDE0-12                   | -0.525441  | 0.525441                   |

The model used is: DecisionTree...

Return the coefficient of determination of the prediction:

0.08565969682925101

R<sup>2</sup> score: 0.885567607231033

Correlation coefficient: 0.9410460175948002

Test data - unseen during training:

R<sup>2</sup> score: 0.08565969682925101

Correlation coefficient: 0.29267677876669856

[7.54525818 7.81436625 7.74958 5.67780021 5.08184454 8.08153751  
 8.37723827 8.1007251 7.81436625 7.81436625 7.01472228 7.74958  
 8.1007251 8.1007251 7.74958 7.54525818 7.81436625 8.1007251 ]

44 8.267606  
 47 8.065502  
 4 7.032920  
 55 7.920819  
 26 4.998569  
 64 8.619789  
 73 7.920819  
 10 7.987163  
 40 8.091515  
 107 7.795880  
 18 7.074688  
 62 8.958607  
 11 8.013228  
 36 6.108463  
 89 8.045757  
 91 9.154902  
 109 8.086186  
 0 7.987163

Name: MCF-7, dtype: float64

Training Root Mean Square Error: 0.3214015824224863

Testing Root Mean Square Error: 0.9108046473050505

## 2.4 Search inside correlation space

```
[16]: step = 0.01
      initial_step = corr_low
      last_step = corr_high
      first_list = [x / 100.0 for x in range(int(initial_step*100),
      ↪int(last_step*100), int(step*100))]
      max_depth = [range(2, 30, 1)]
```

```

corr_th = []
second_list = []
third_list = []
fourth_l = []
fifth_l = []
f_list = []
fif_list = []
for i in first_list:
    for depth in max_depth[0]:

        without_standardization, train_r2, test_r2, _, h_, target_column_name,
        ↪training_data_RMSE, test_data_RMSE = pred_model.
        ↪prepare_data_and_create_model(molecular_descriptors_df=data,

        ↪
                                correlation_threshold=i,
                                ↪
                                standardization=False,
                                ↪
                                model_type='DecisionTreeRegressor',
                                ↪
                                max_depth=depth,
                                ↪
                                target_column_name = target,
                                ↪
                                random_state=random_state,
                                ↪
                                train_test_split_=True,
                                ↪
                                verbose=False)
        corr_th.append(i)
        second_list.append(train_r2)
        third_list.append(test_r2)
        fourth_l.append(training_data_RMSE)
        fifth_l.append(test_data_RMSE)
        f_list.append(len(h_))
        fif_list.append(depth)

```

```

[17]: df_without_standardization = pd.DataFrame(data=corr_th, columns=["Correlation_
        ↪threshold"])
df_without_standardization['Training data R^2 score'] = second_list
df_without_standardization['Test data R^2 score'] = third_list
df_without_standardization['Training RMSE'] = fourth_l
df_without_standardization['Test RMSE'] = fifth_l
df_without_standardization['Number of features'] = f_list
df_without_standardization['Depth number'] = fif_list

```

```
[18]: df_decision_tree = df_without_standardization.copy()
      #df_without_standardization.to_excel('../Data/
      ↪A549_Decision_tree_rs_'+str(random_state)+'.xlsx')
```

## 2.5 Plots

```
[19]: corre_list = [x / 100.0 for x in range(int(initial_step*100),
      ↪int(last_step*100), int(0.01*100))]
      for element in corre_list:
          element_ =
          ↪df_without_standardization[df_without_standardization['Correlation_
          ↪threshold'] == float(element)]
          plt.plot(element_['Depth number'], element_['Training data R^2 score'],
          ↪label = "Training data R^2 score", marker='v')
          plt.plot(element_['Depth number'], element_['Test data R^2 score'], label =
          ↪"Test data R^2 score", marker='D')
          plt.legend()
          plt.xlabel('Depth number -> correlation threshold: '+str(element)+' \n
          ↪Number of features: '+str(element_['Number of features'].iloc[0]),
          ↪fontweight='bold')
          plt.xlim(max(element_['Depth number'])+1, min(element_['Depth number'])-1)
          plt.ylabel('R^2 score')
          plt.ylim([0, 1])
          plt.rc('grid', linestyle="-. ", color='black')
          plt.grid(True)
          plt.show()
```



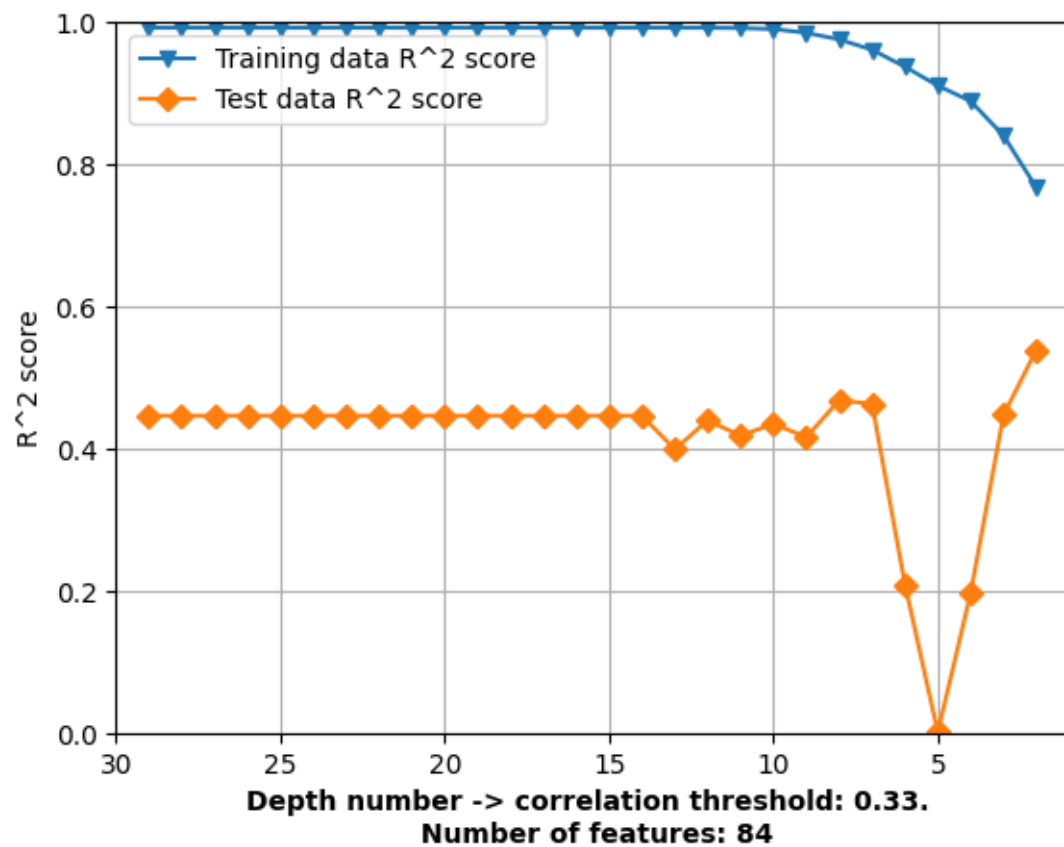

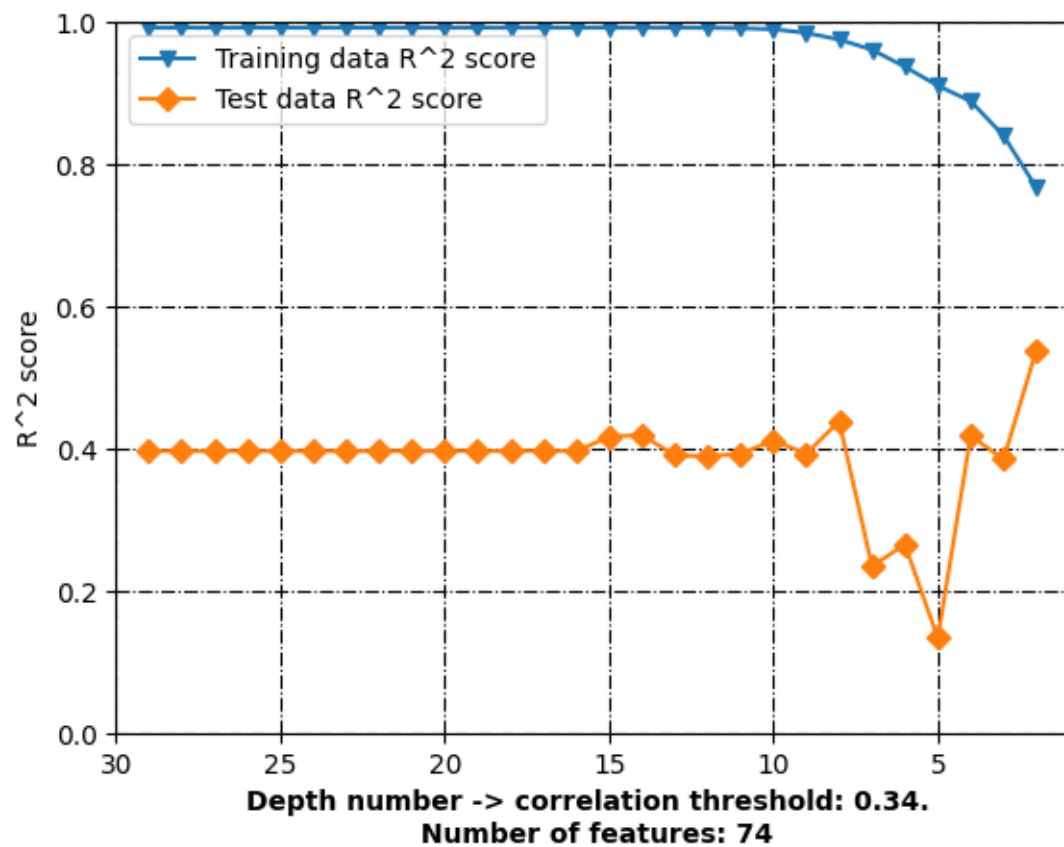

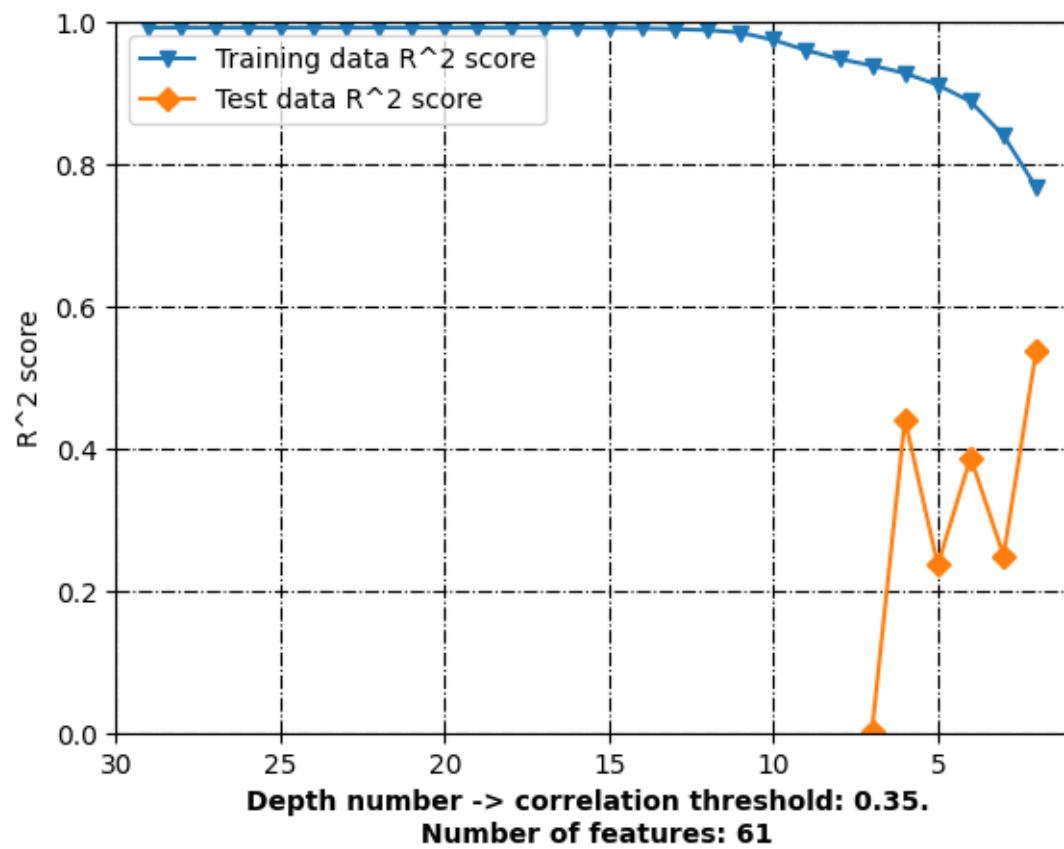

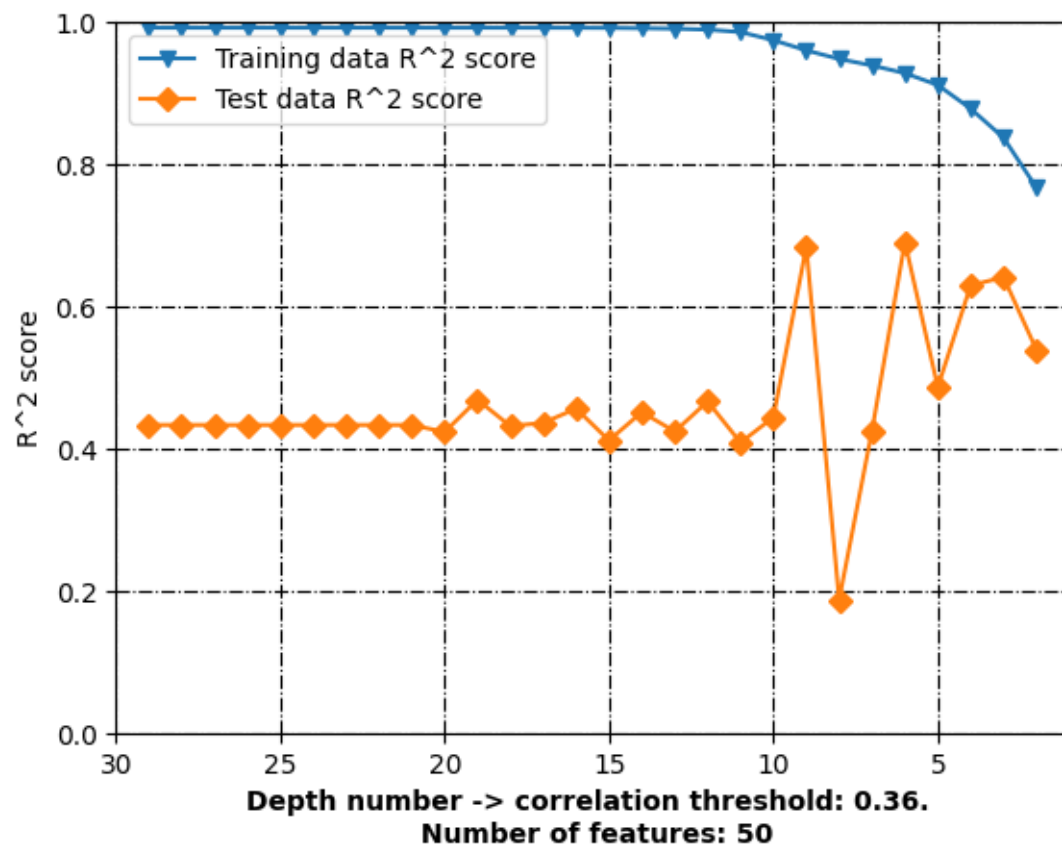

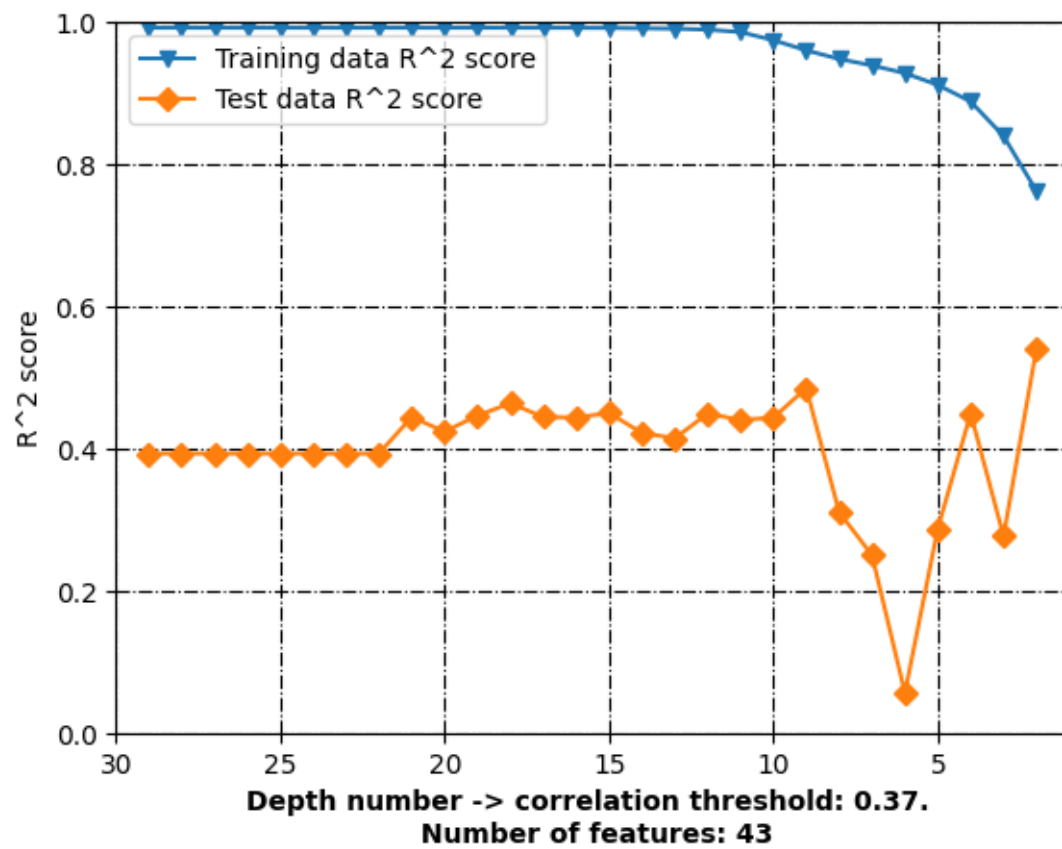

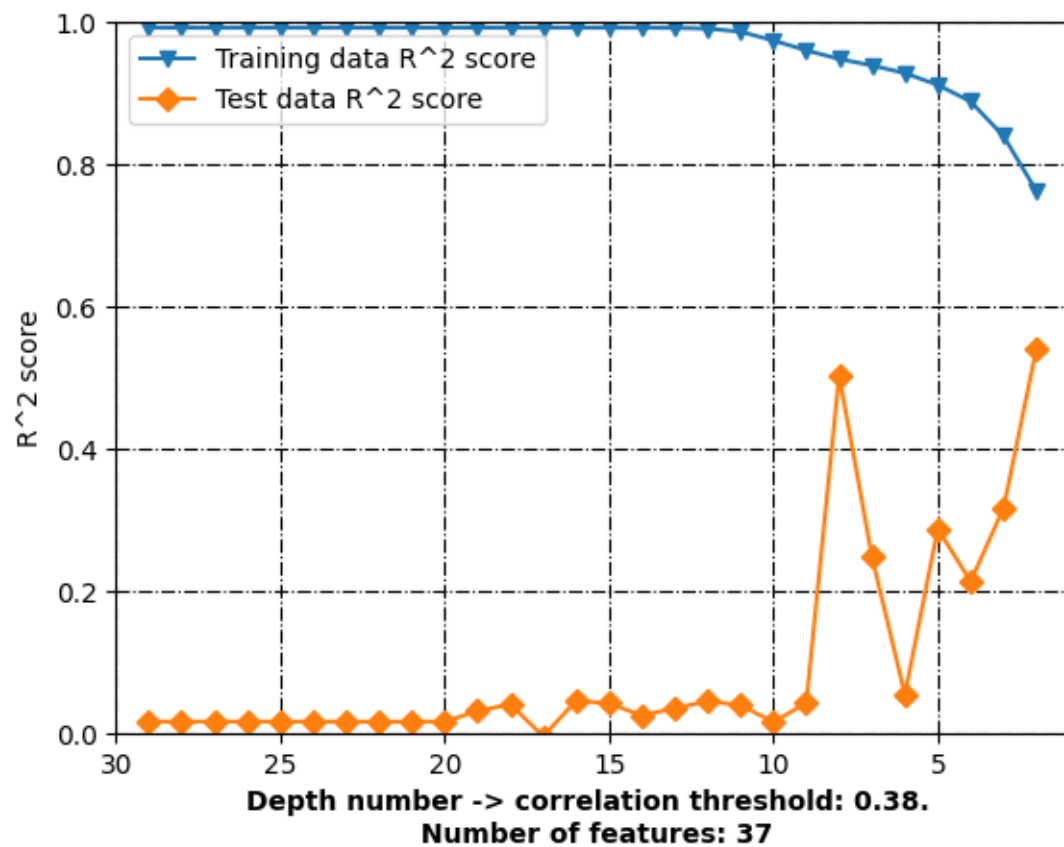

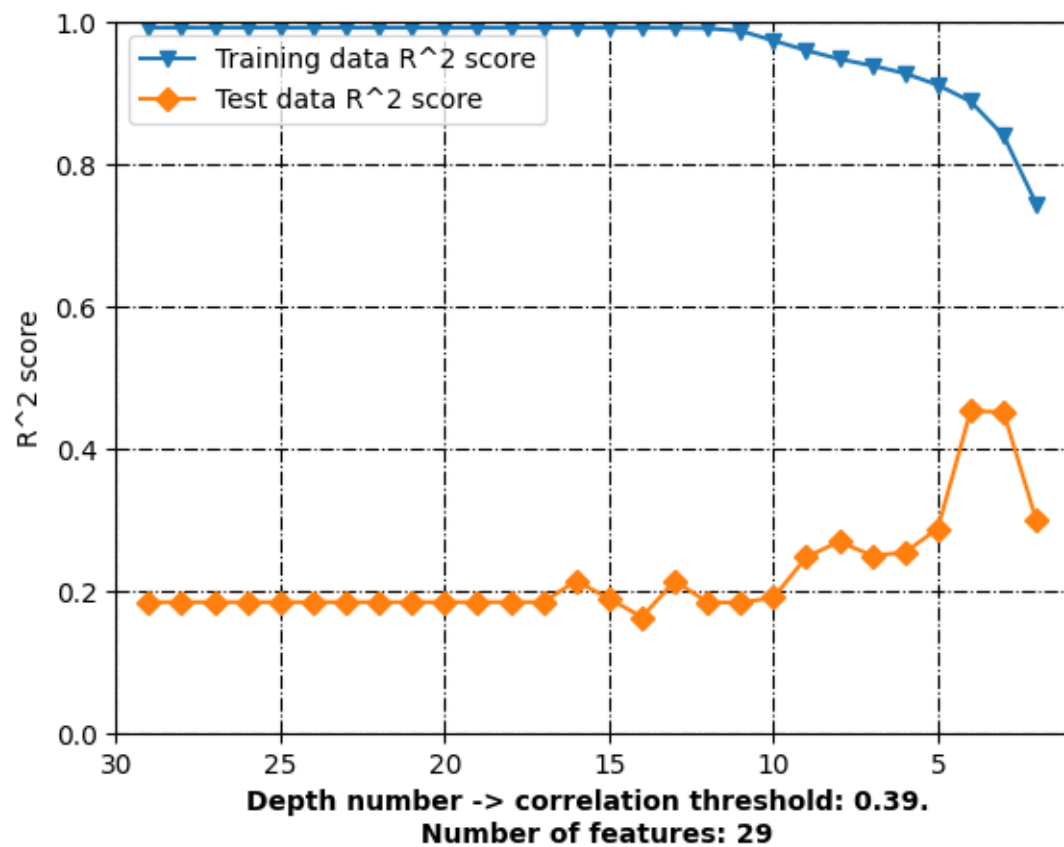

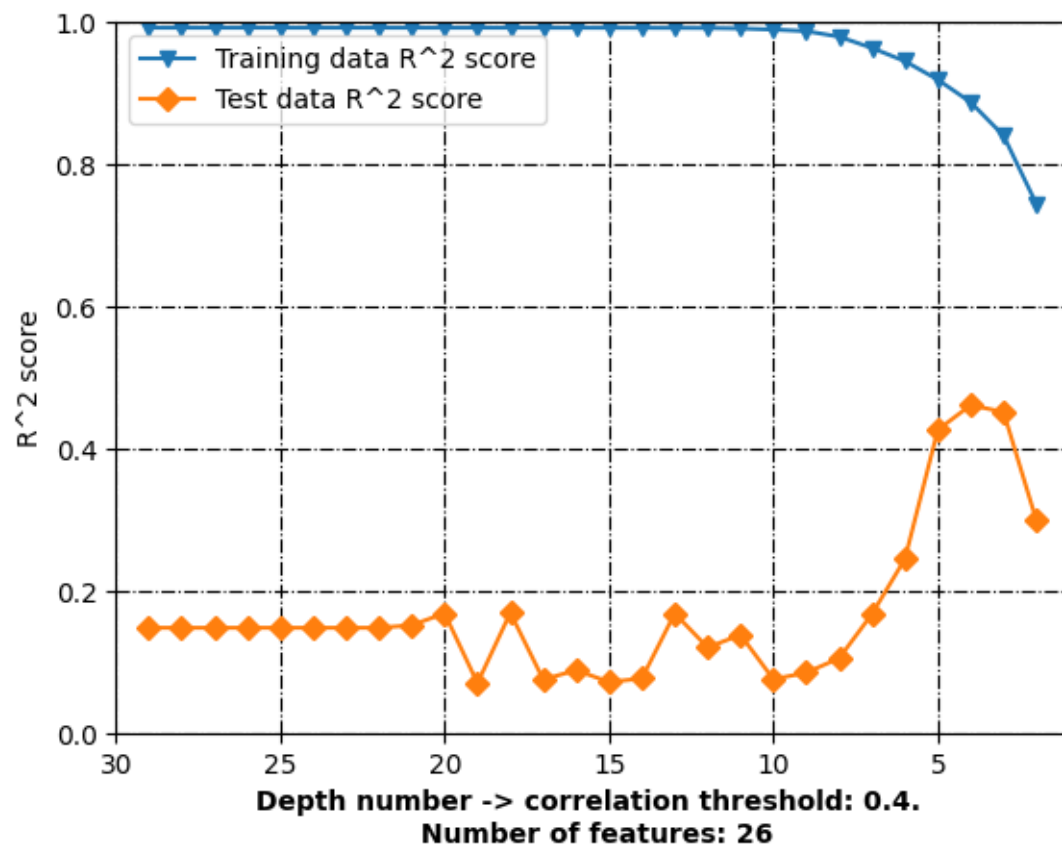



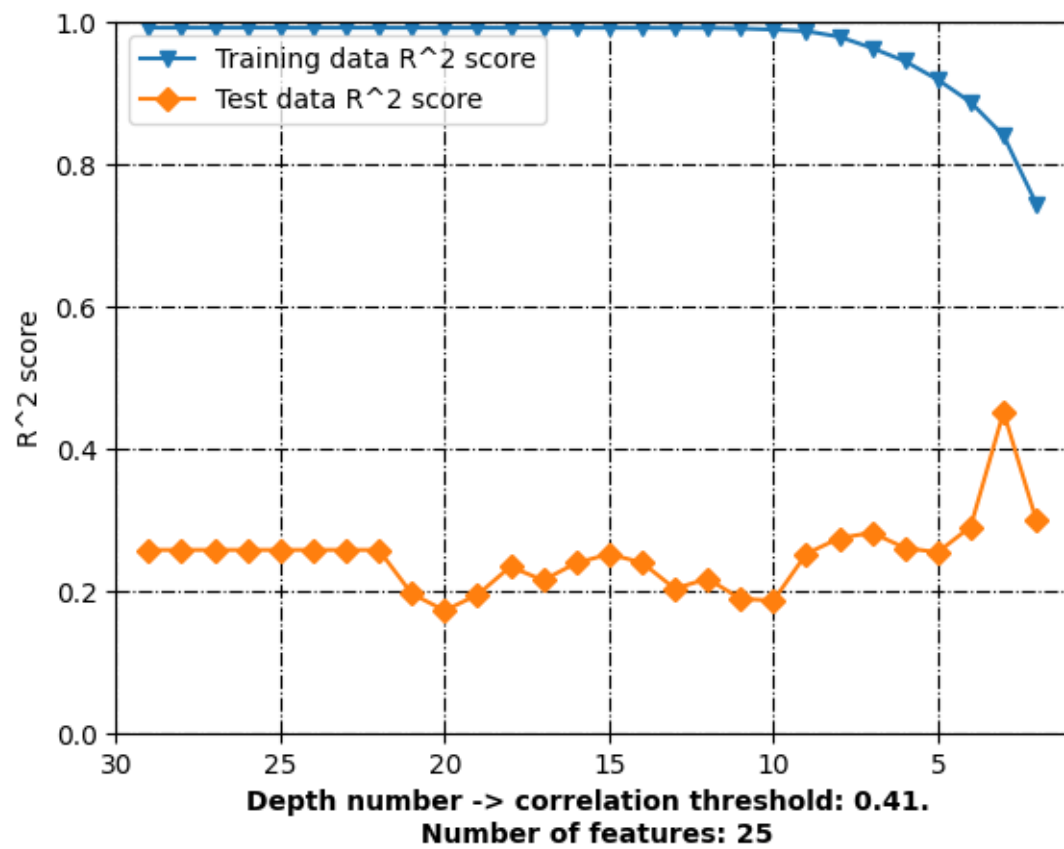

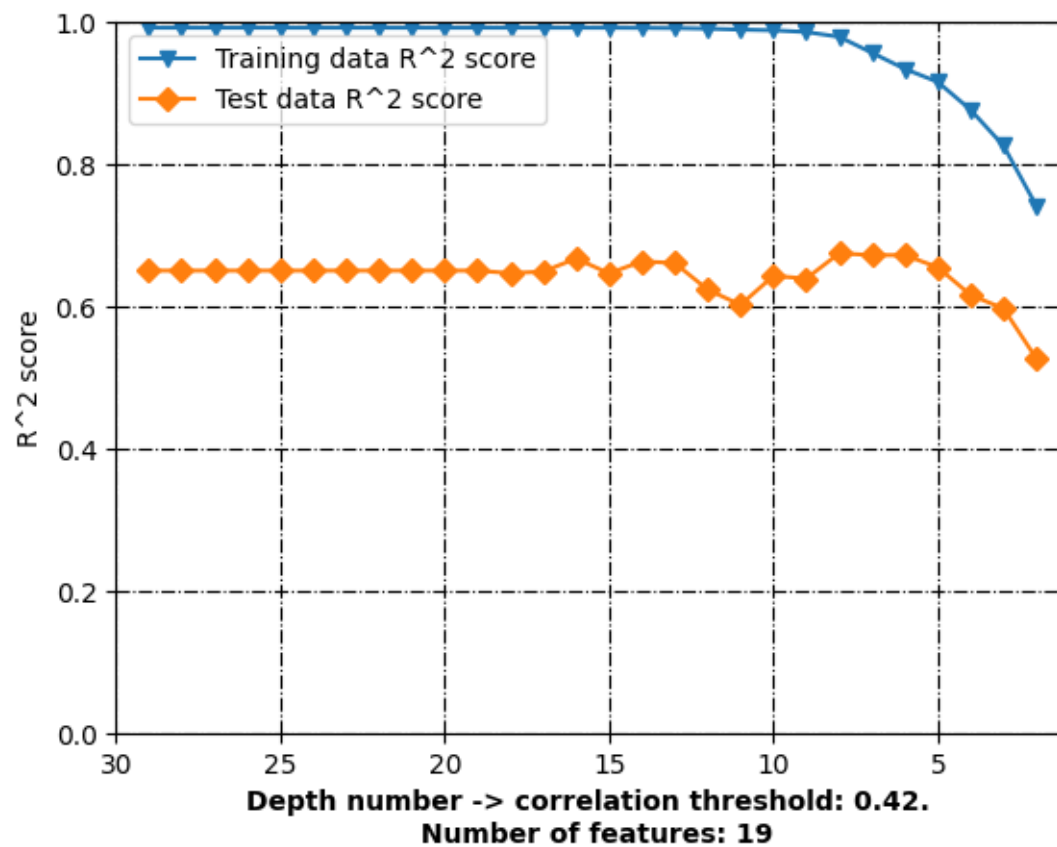

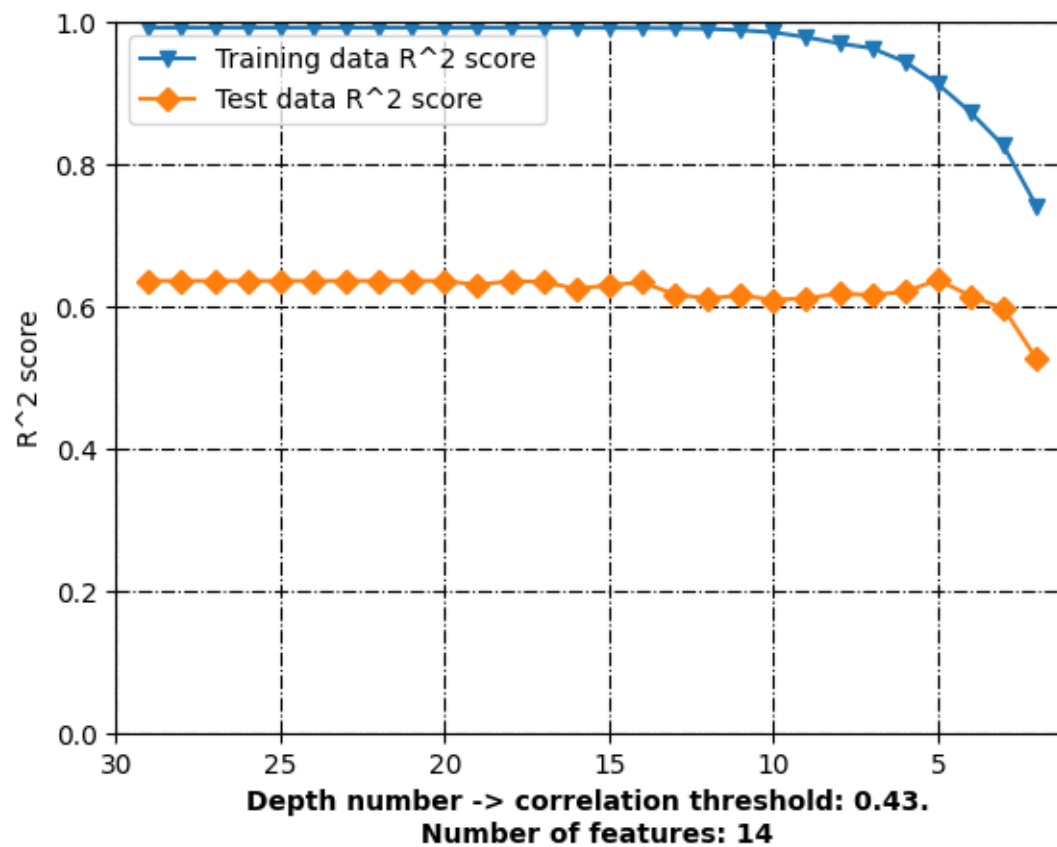

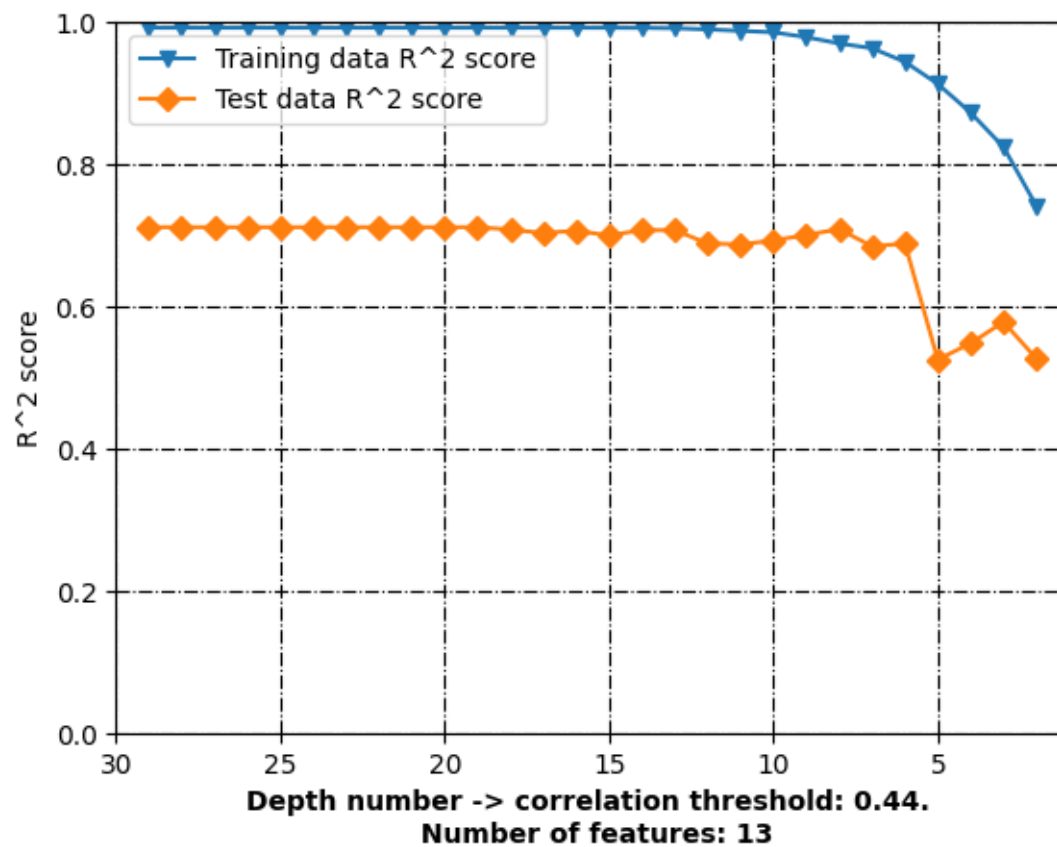

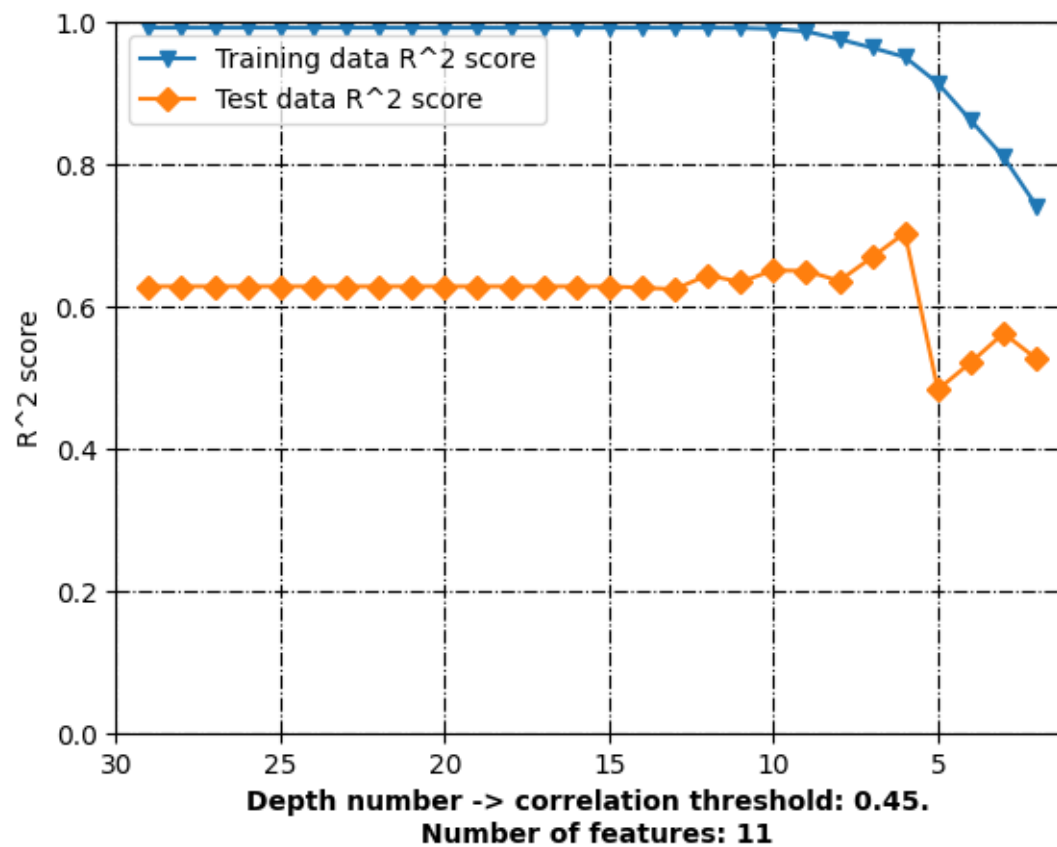

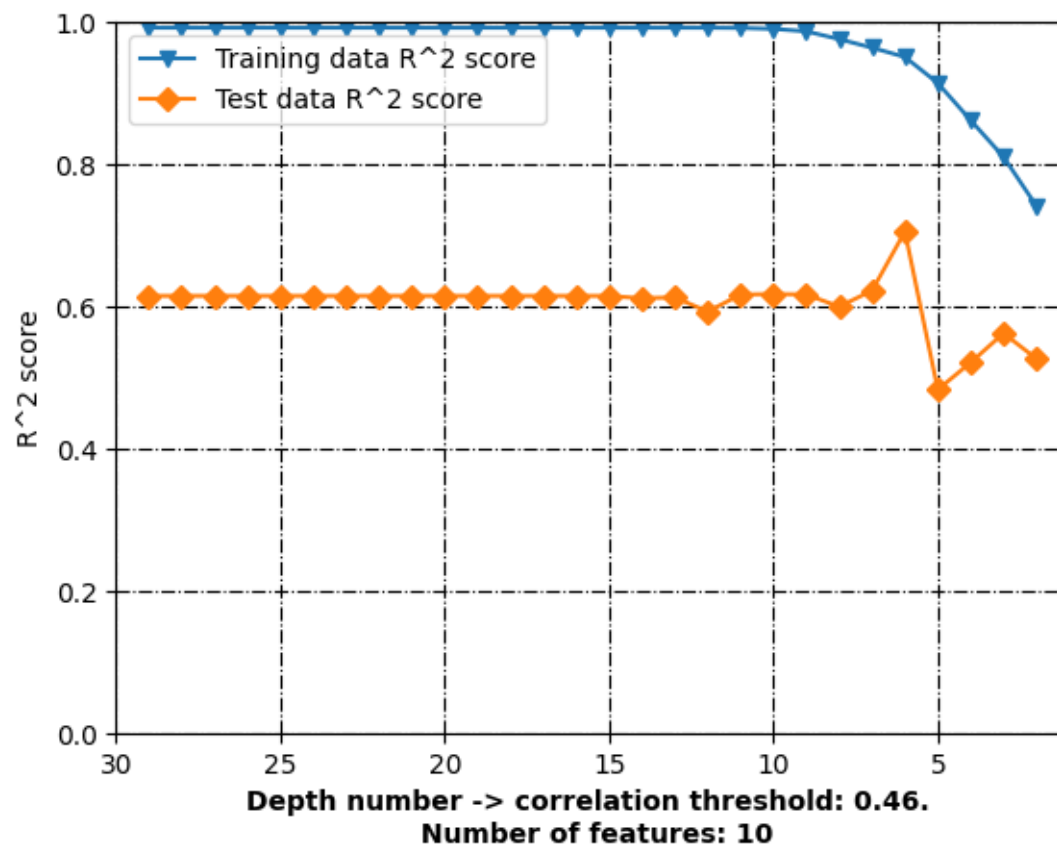

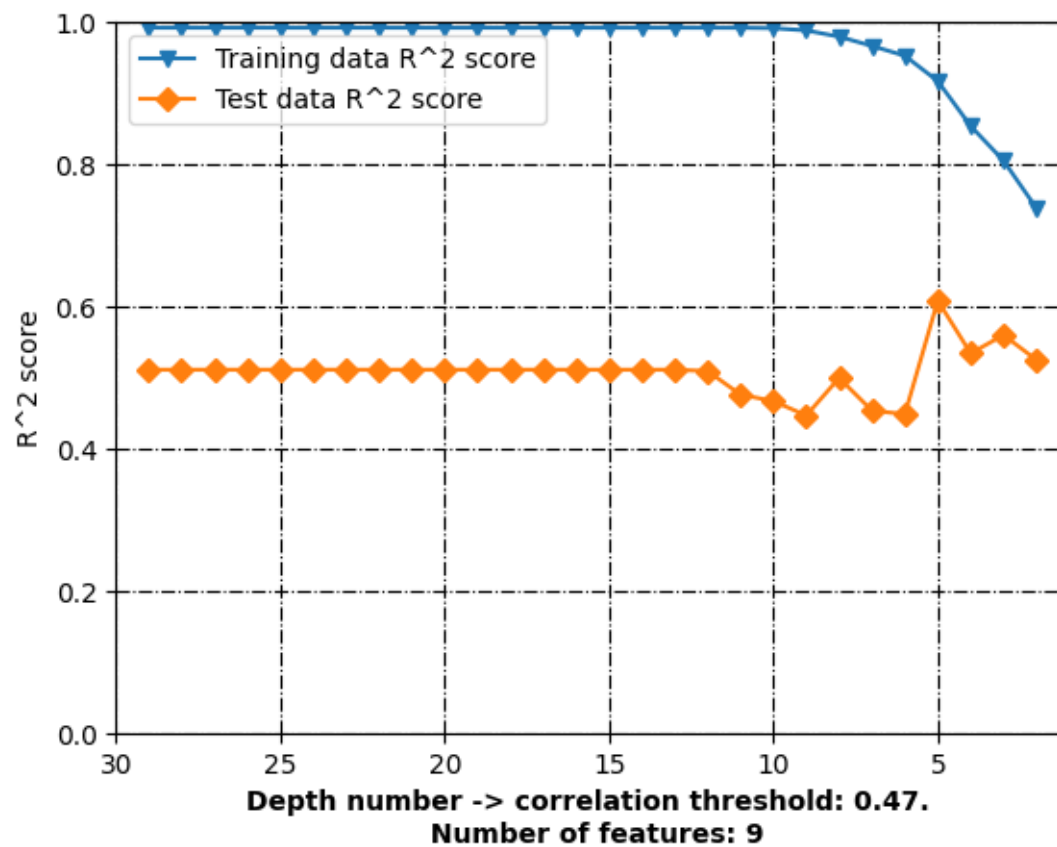

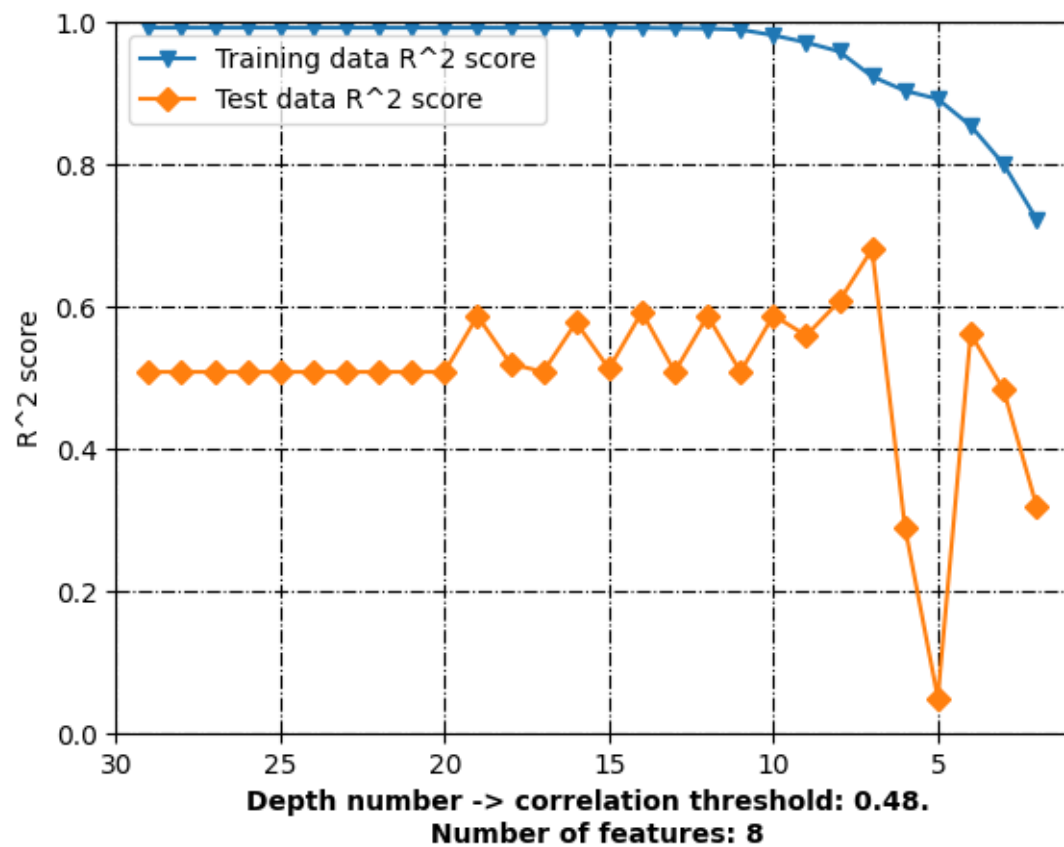



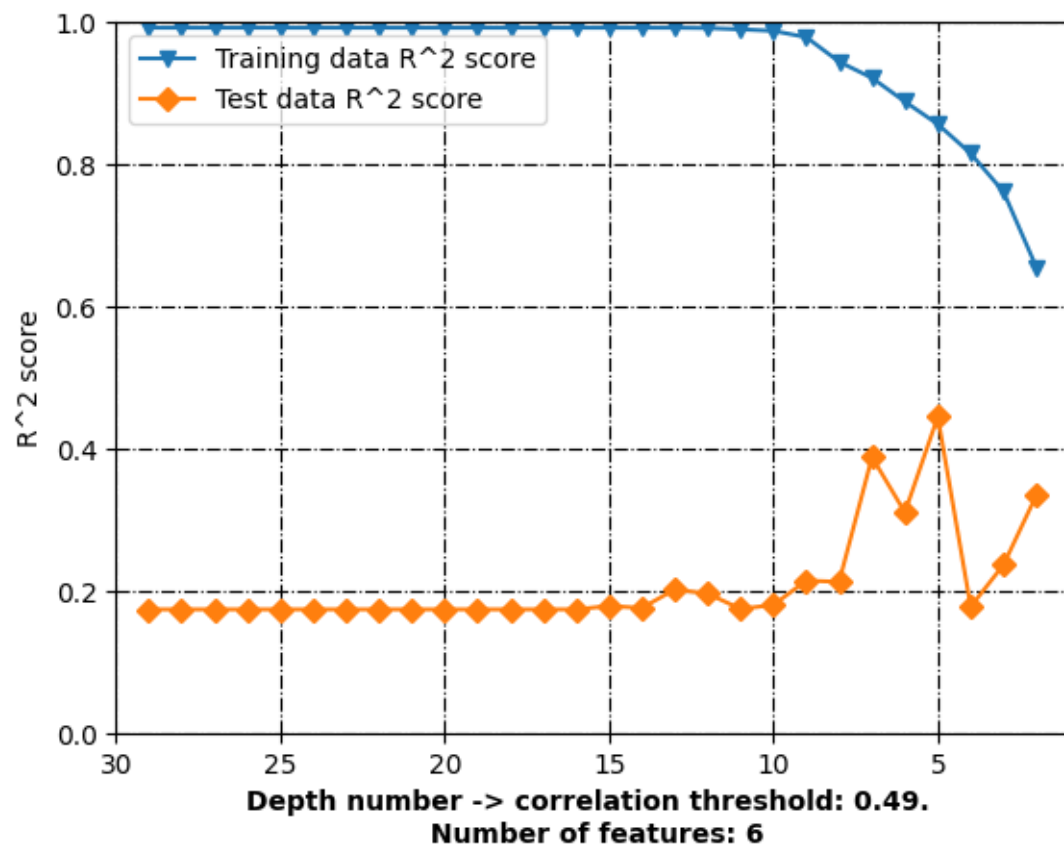

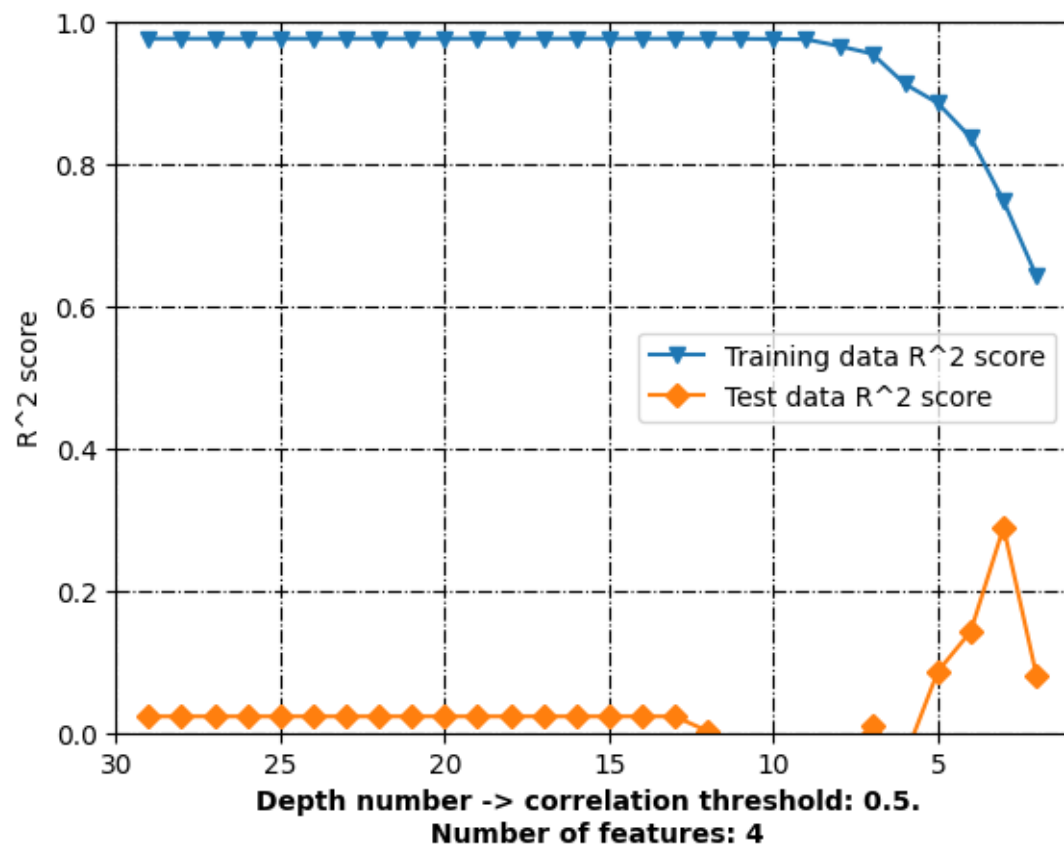

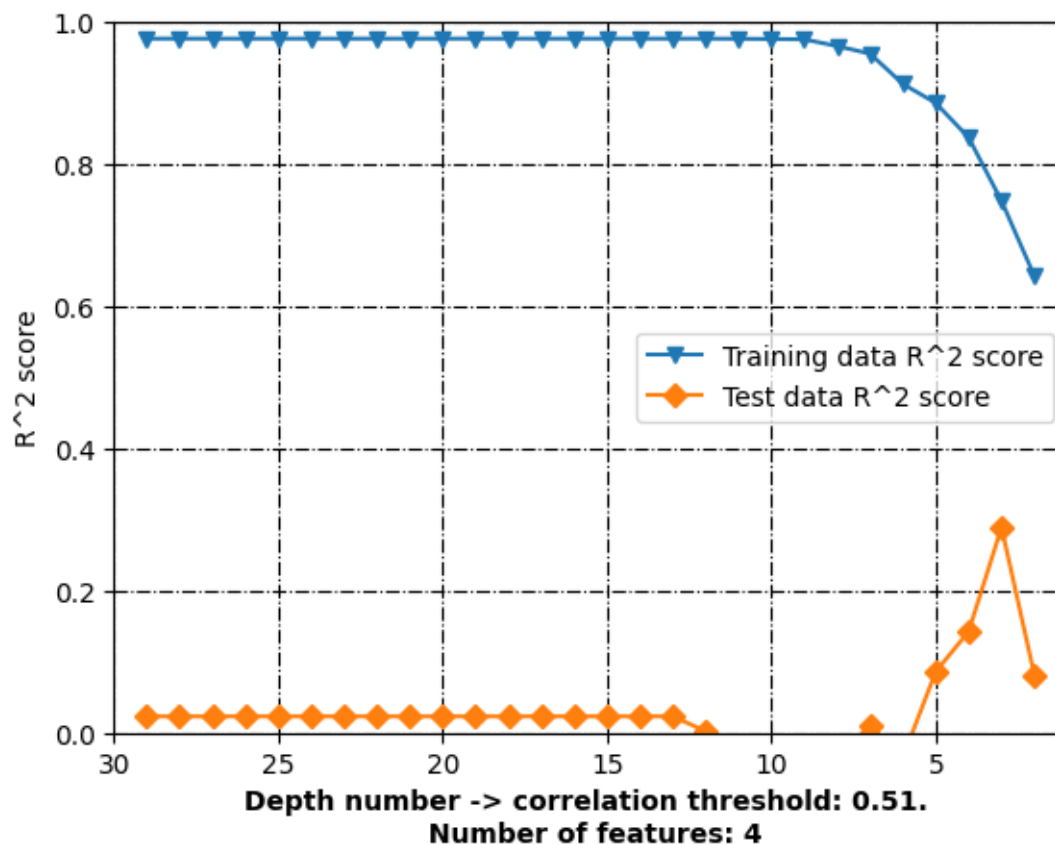

```
[20]: plt.plot(df_without_standardization['Correlation threshold'],
             df_without_standardization['Number of features'], label = "Number of
             features", marker='.')
plt.legend()
plt.xlabel('Correlation threshold')
plt.ylabel('Number of features')
plt.show()
```



[ ]:

### 3 Random Forest

```
[21]: without_standardization, train_r2_, test_r2_, hist1, hist2, target_column_name,
      ↪ training_data_RMSE, test_data_RMSE = pred_model.
      ↪ prepare_data_and_create_model(molecular_descriptors_df=data,
      ↪
      ↪         correlation_threshold=0.50,
      ↪
      ↪         standardization=False,
      ↪
      ↪         model_type='RandomForestRegressor',
      ↪
      ↪         n_estimators=12,
      ↪
      ↪         target_column_name = target,
      ↪
      ↪         random_state=random_state,
```

```

↪          train_test_split_=True,
↪          verbose=True)

```

I am not doing standardization...

```

molecular descriptor name
0          AATSOZ
1          AATSOare
2          AATSOd
3          AATSOdv
4          AATSOi
molecular descriptor name  corr_value
0          AATSOZ      -0.038502
1          AATSOare    -0.120847
2          AATSOd      0.041648
3          AATSOdv     -0.115899
4          AATSOi      0.191765
molecular descriptor name  corr_value  absolute correlation value
0          AATSOZ      -0.038502          0.038502
1          AATSOare    -0.120847          0.120847
2          AATSOd      0.041648          0.041648
3          AATSOdv     -0.115899          0.115899
4          AATSOi      0.191765          0.191765
molecular descriptor name  corr_value  absolute correlation value
226          AMID_0      -0.520578          0.520578
505          EState_VSA5 -0.578904          0.578904
506          EState_VSA6 0.519794          0.519794
791          MDEO-12     -0.525441          0.525441
1211         MCF-7       1.000000          1.000000
molecular descriptor name  corr_value  absolute correlation value
226          AMID_0      -0.520578          0.520578
505          EState_VSA5 -0.578904          0.578904
506          EState_VSA6 0.519794          0.519794
791          MDEO-12     -0.525441          0.525441
The model used is: RandomForest...
Return the coefficient of determination of the prediction:
0.3896895830895062
R^2 score: 0.9161168599597713
Correlation coefficient: 0.9571399375011844
Test data - unseen during training:
R^2 score: 0.3896895830895062
Correlation coefficient: 0.6242512179319366
[7.7026269  7.66385111 7.28090766 7.13067235 5.29752234 8.36053117
 8.31454573 7.72841569 7.89518196 8.02037119 7.26759299 7.36357456
 8.0252565  7.89142517 7.4779577  7.7026269  7.81209996 8.24428702]
44      8.267606
47      8.065502

```

```

4      7.032920
55     7.920819
26     4.998569
64     8.619789
73     7.920819
10     7.987163
40     8.091515
107    7.795880
18     7.074688
62     8.958607
11     8.013228
36     6.108463
89     8.045757
91     9.154902
109    8.086186
0      7.987163

```

Name: MCF-7, dtype: float64

Training Root Mean Square Error: 0.2751761947609772

Testing Root Mean Square Error: 0.7441263740659375

```

[22]: print(target_column_name+str('_transformed'))
      print(hist1[target_column_name].hist())

```

MCF-7\_transformed

AxesSubplot(0.125,0.11;0.775x0.77)

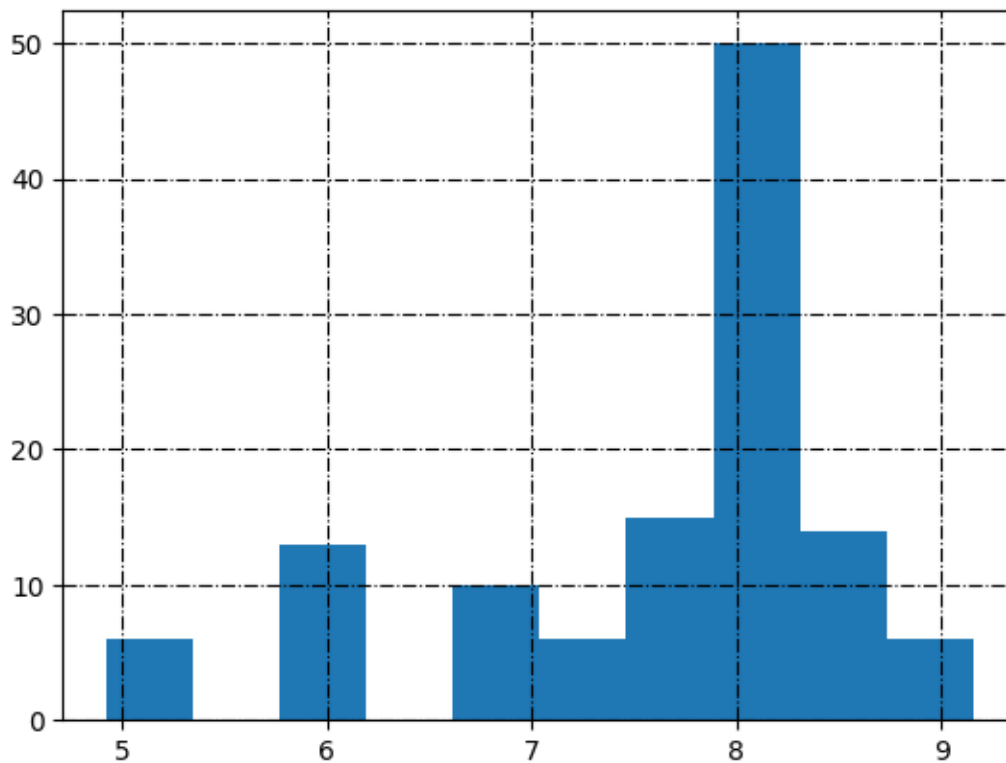

```
[23]: with_standardization, train_r2_, test_r2_, hist1, hist2, target_column_name,
      ↪ training_data_RMSE, test_data_RMSE = pred_model.
      ↪ prepare_data_and_create_model(molecular_descriptors_df=data,
      ↪
      ↪         correlation_threshold=0.50,
      ↪
      ↪         standardization=True,
      ↪
      ↪         model_type='RandomForestRegressor',
      ↪
      ↪         n_estimators=12,
      ↪
      ↪         target_column_name = target,
      ↪
      ↪         random_state=random_state,
      ↪
      ↪         train_test_split=True,
      ↪
      ↪         verbose=True)
```

I am doing standardization...

|     | molecular descriptor name |            |                            |
|-----|---------------------------|------------|----------------------------|
| 0   | AATSOZ                    |            |                            |
| 1   | AATSOare                  |            |                            |
| 2   | AATSOd                    |            |                            |
| 3   | AATSOdv                   |            |                            |
| 4   | AATSOi                    |            |                            |
|     | molecular descriptor name | corr_value |                            |
| 0   | AATSOZ                    | -0.038502  |                            |
| 1   | AATSOare                  | -0.120847  |                            |
| 2   | AATSOd                    | 0.041648   |                            |
| 3   | AATSOdv                   | -0.115899  |                            |
| 4   | AATSOi                    | 0.191765   |                            |
|     | molecular descriptor name | corr_value | absolute correlation value |
| 0   | AATSOZ                    | -0.038502  | 0.038502                   |
| 1   | AATSOare                  | -0.120847  | 0.120847                   |
| 2   | AATSOd                    | 0.041648   | 0.041648                   |
| 3   | AATSOdv                   | -0.115899  | 0.115899                   |
| 4   | AATSOi                    | 0.191765   | 0.191765                   |
|     | molecular descriptor name | corr_value | absolute correlation value |
| 226 | AMID_0                    | -0.520578  | 0.520578                   |
| 505 | EState_VSA5               | -0.578904  | 0.578904                   |
| 506 | EState_VSA6               | 0.519794   | 0.519794                   |
| 791 | MDE0-12                   | -0.525441  | 0.525441                   |

|      |                           |            |                            |
|------|---------------------------|------------|----------------------------|
| 1211 | MCF-7                     | 1.000000   | 1.000000                   |
|      | molecular descriptor name | corr_value | absolute correlation value |
| 226  | AMID_0                    | -0.520578  | 0.520578                   |
| 505  | EState_VSA5               | -0.578904  | 0.578904                   |
| 506  | EState_VSA6               | 0.519794   | 0.519794                   |
| 791  | MDEO-12                   | -0.525441  | 0.525441                   |

The model used is: RandomForest...

Return the coefficient of determination of the prediction:

0.3896895830895062

R<sup>2</sup> score: 0.9161168599597713

Correlation coefficient: 0.9571399375011844

Test data - unseen during training:

R<sup>2</sup> score: 0.3896895830895062

Correlation coefficient: 0.6242512179319366

[7.7026269 7.66385111 7.28090766 7.13067235 5.29752234 8.36053117  
8.31454573 7.72841569 7.89518196 8.02037119 7.26759299 7.36357456  
8.0252565 7.89142517 7.4779577 7.7026269 7.81209996 8.24428702]

44 8.267606  
47 8.065502  
4 7.032920  
55 7.920819  
26 4.998569  
64 8.619789  
73 7.920819  
10 7.987163  
40 8.091515  
107 7.795880  
18 7.074688  
62 8.958607  
11 8.013228  
36 6.108463  
89 8.045757  
91 9.154902  
109 8.086186  
0 7.987163

Name: MCF-7, dtype: float64

Training Root Mean Square Error: 0.2751761947609772

Testing Root Mean Square Error: 0.7441263740659375

### 3.1 Search inside correlation space

```
[24]: step = 0.01
      initial_step = corr_low
      last_step = corr_high
      first_list = [x / 100.0 for x in range(int(initial_step*100),
      ↪int(last_step*100), int(step*100))]
      n_estimators = [range(2,21,1)]
```



```

corr_th = []
second_list = []
third_list = []
fourth_l = []
fifth_l = []
f_list = []
fif_list = []
for i in first_list:

    for estimator in n_estimators[0]:

        without_standardization, train_r2, test_r2, _, h_, target_column_name,
        ↪ training_data_RMSE, test_data_RMSE = pred_model.
        ↪ prepare_data_and_create_model(molecular_descriptors_df=data,

        ↪
                                correlation_threshold=i,
                                ↪
                                standardization=False,
                                ↪
                                model_type='RandomForestRegressor',
                                ↪
                                n_estimators_=estimator,
                                ↪
                                target_column_name = target,
                                ↪
                                random_state=random_state,
                                ↪
                                train_test_split_=True,
                                ↪
                                verbose=False)
        corr_th.append(i)
        second_list.append(train_r2)
        third_list.append(test_r2)
        fourth_l.append(training_data_RMSE)
        fifth_l.append(test_data_RMSE)
        f_list.append(len(h_))
        fif_list.append(estimator)

```

```

[25]: df_without_standardization = pd.DataFrame(data=corr_th, columns=["Correlation_
        ↪ threshold"])
df_without_standardization['Training data R^2 score'] = second_list
df_without_standardization['Test data R^2 score'] = third_list
df_without_standardization['Training RMSE'] = fourth_l
df_without_standardization['Test RMSE'] = fifth_l
df_without_standardization['Number of features'] = f_list
df_without_standardization['Number of estimators'] = fif_list

```

```

[26]: df_random_forest = df_without_standardization.copy()
      #df_without_standardization.to_excel('../Data/
      ↪A549_Random_forest_rs_'+str(random_state)+'.xlsx')

[27]: corre_list = [x / 100.0 for x in range(int(initial_step*100),
      ↪int(last_step*100), int(0.01*100))]
      for element in corre_list:
          element_ =
          ↪df_without_standardization[df_without_standardization['Correlation_
          ↪threshold'] == float(element)]
          plt.plot(element_['Number of estimators'], element_['Training data R^2_
          ↪score'], label = "Training data R^2 score", marker='v')
          plt.plot(element_['Number of estimators'], element_['Test data R^2 score'],
          ↪label = "Test data R^2 score", marker='D')
          plt.legend()
          plt.xlabel('Number of estimators -> correlation threshold: '+str(element)+'.'
          ↪\n Number of features: '+str(element_['Number of features'].iloc[0]))
          plt.xlim(max(element_['Number of estimators'])+1, min(element_['Number of_
          ↪estimators'])-1)
          plt.ylabel('R^2 score')
          plt.ylim([0, 1])
          plt.rc('grid', linestyle="-. ", color='black')
          plt.grid(True)
          plt.show()

```

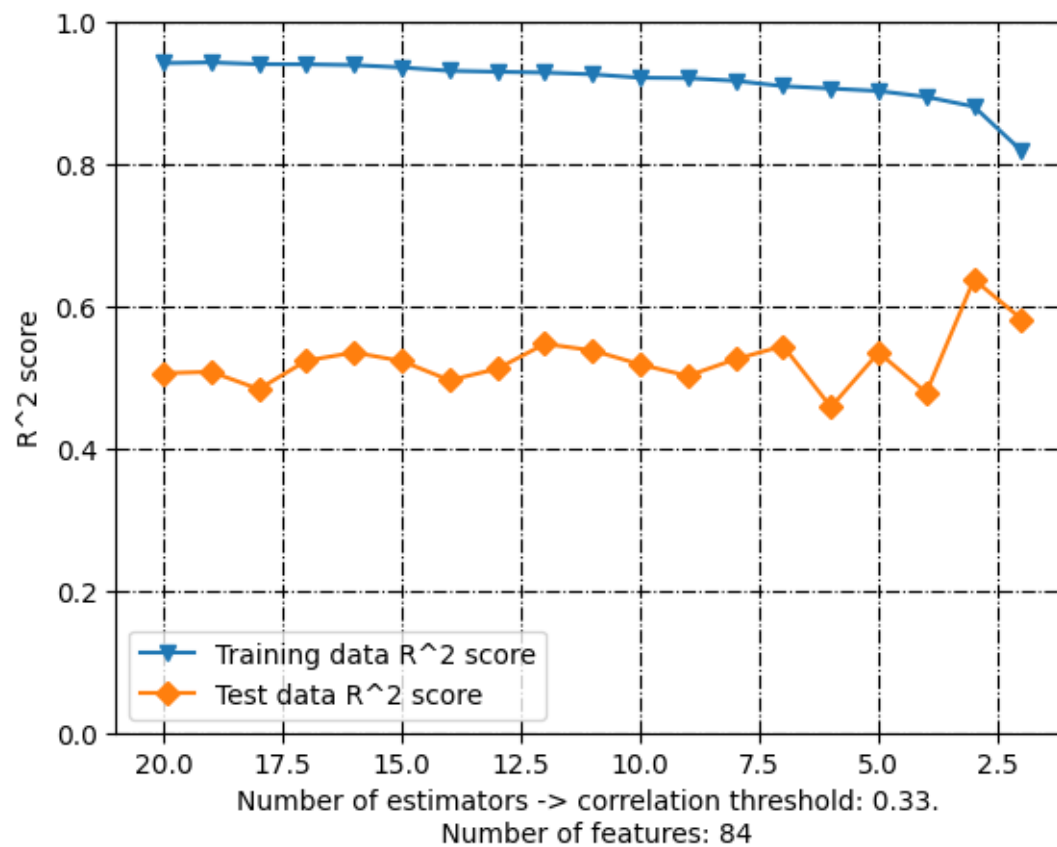

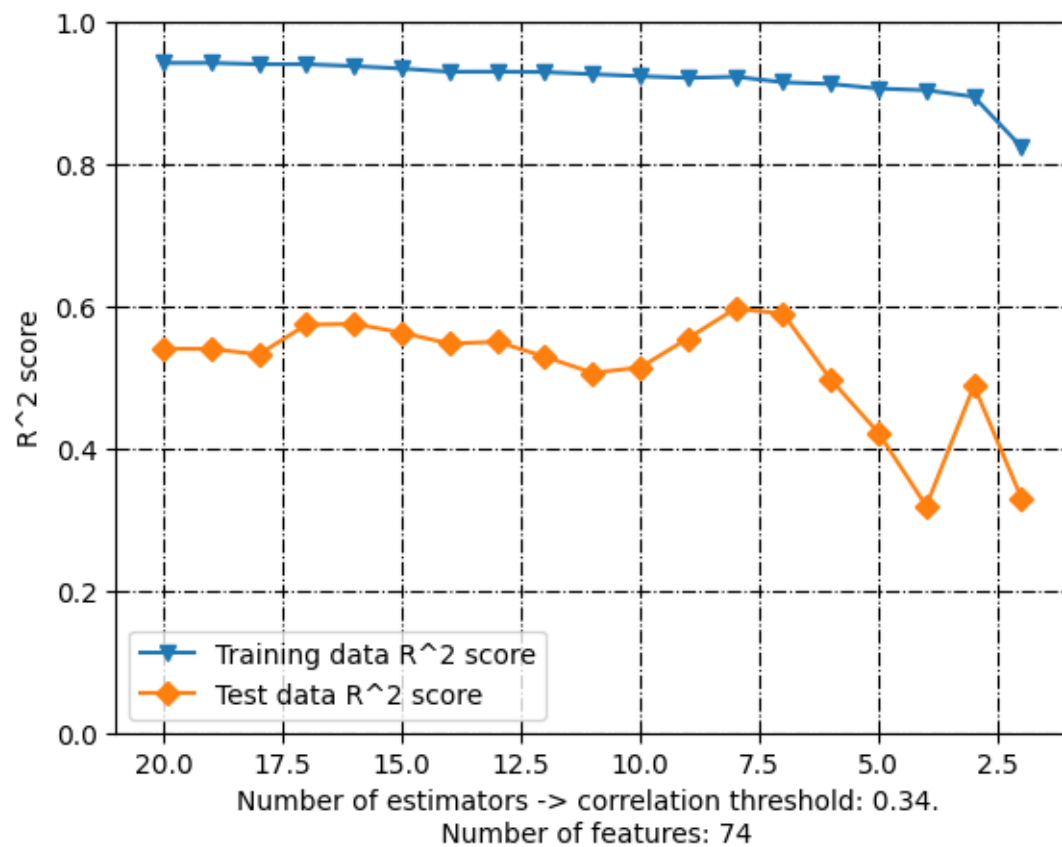

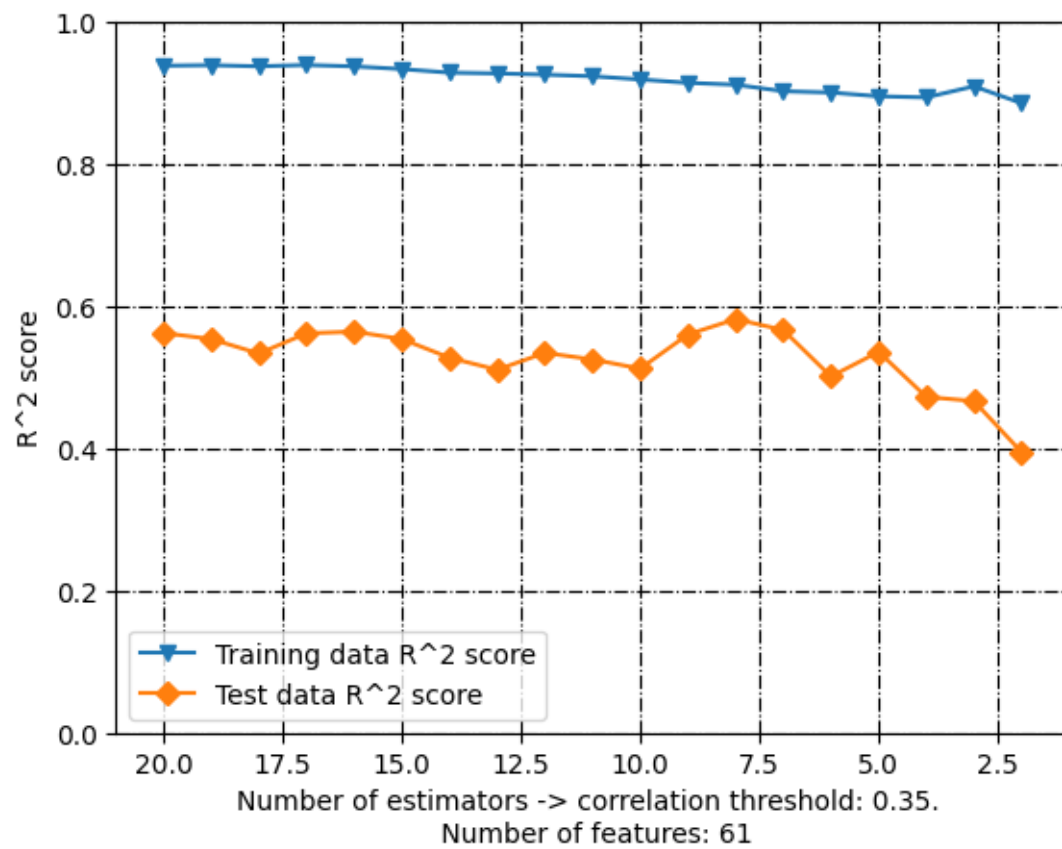

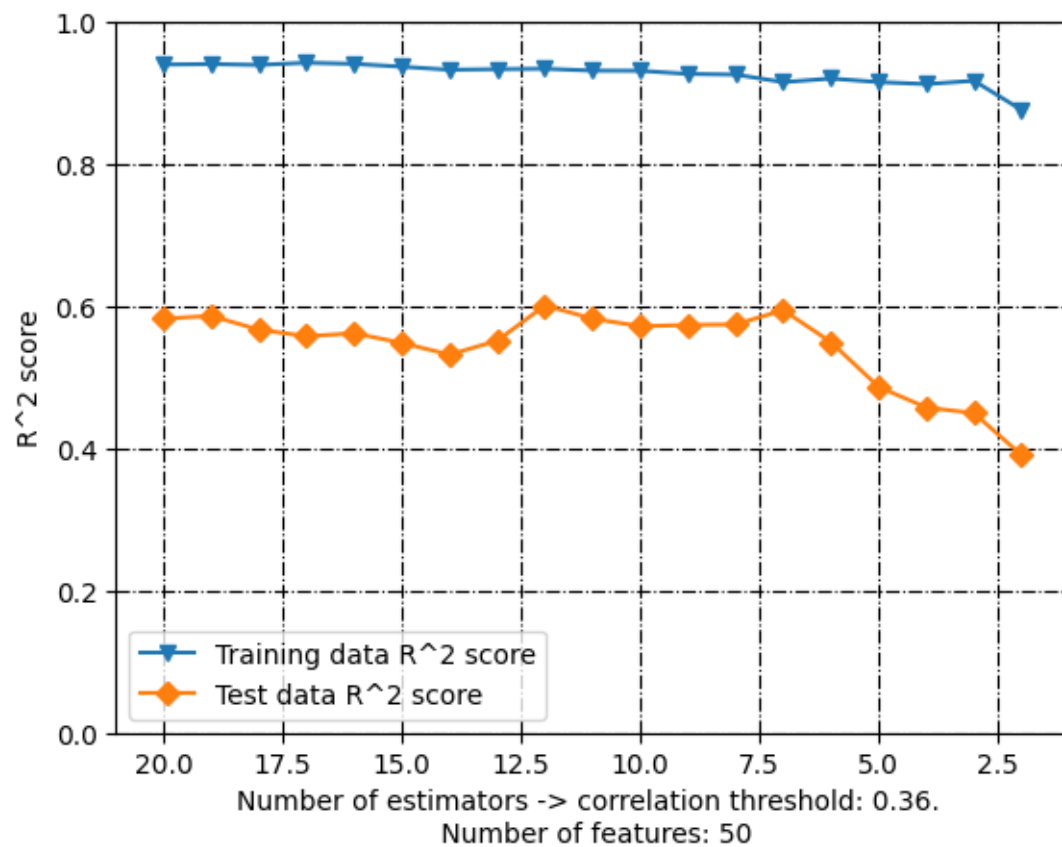

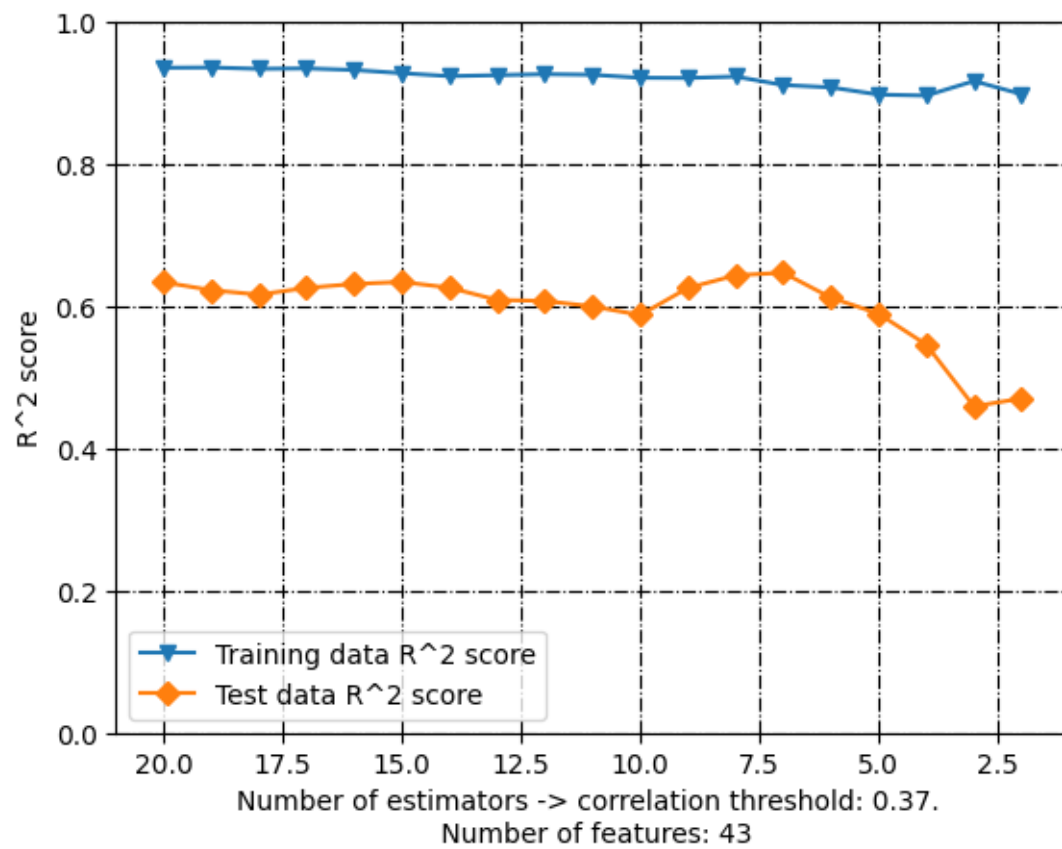

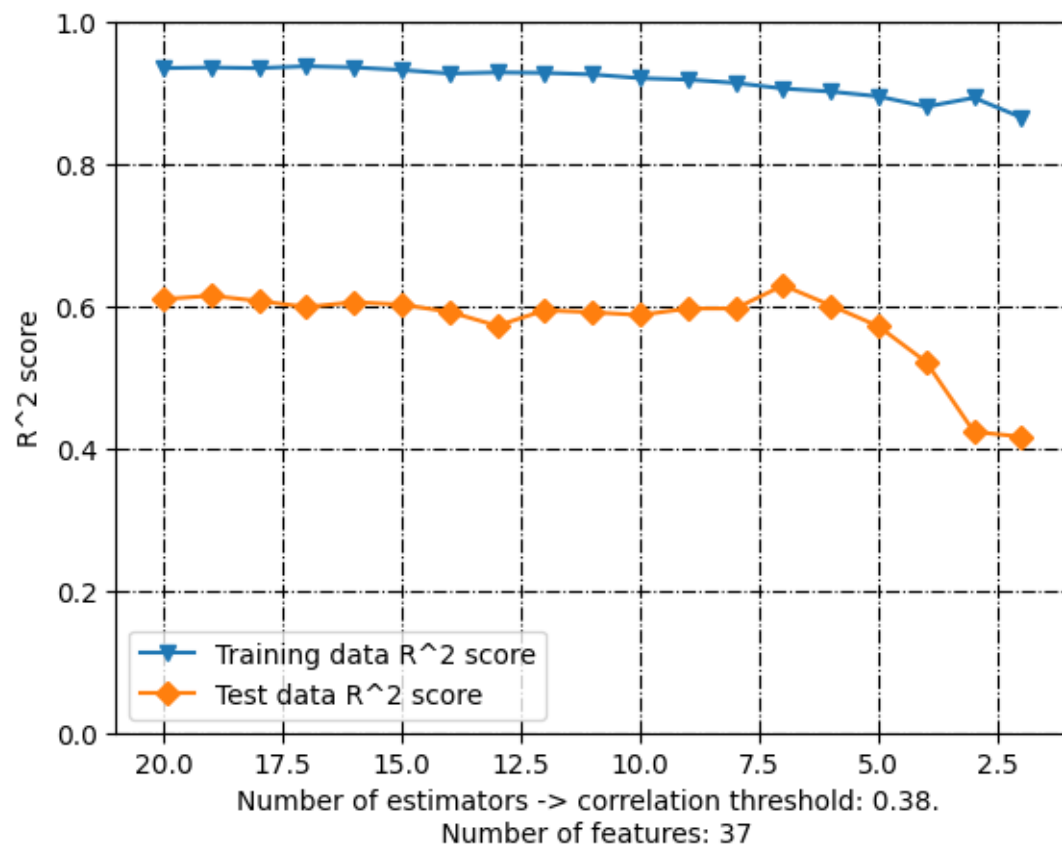



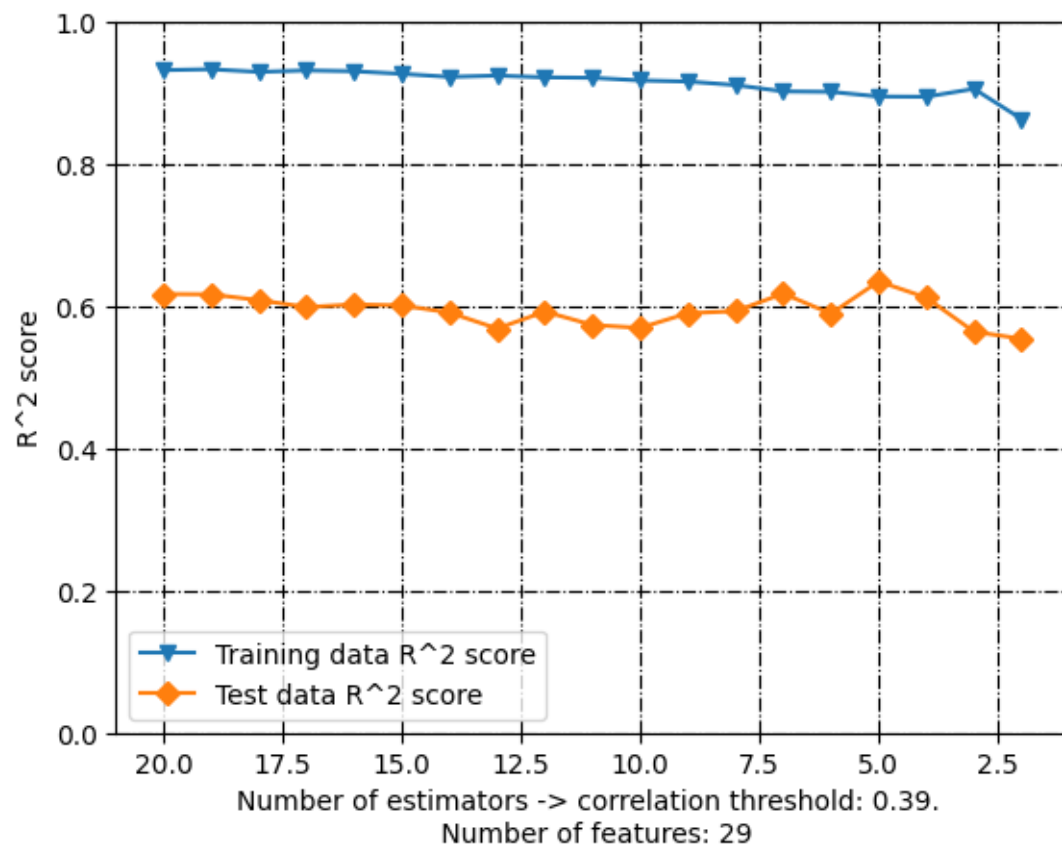

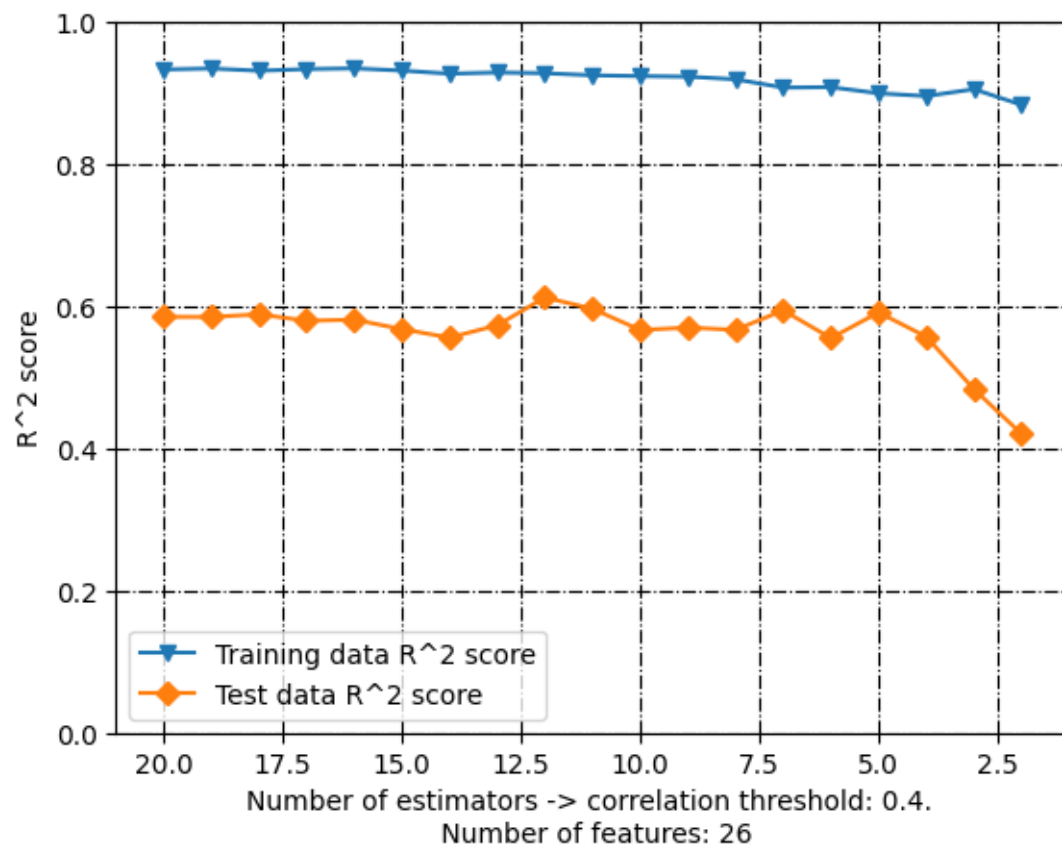

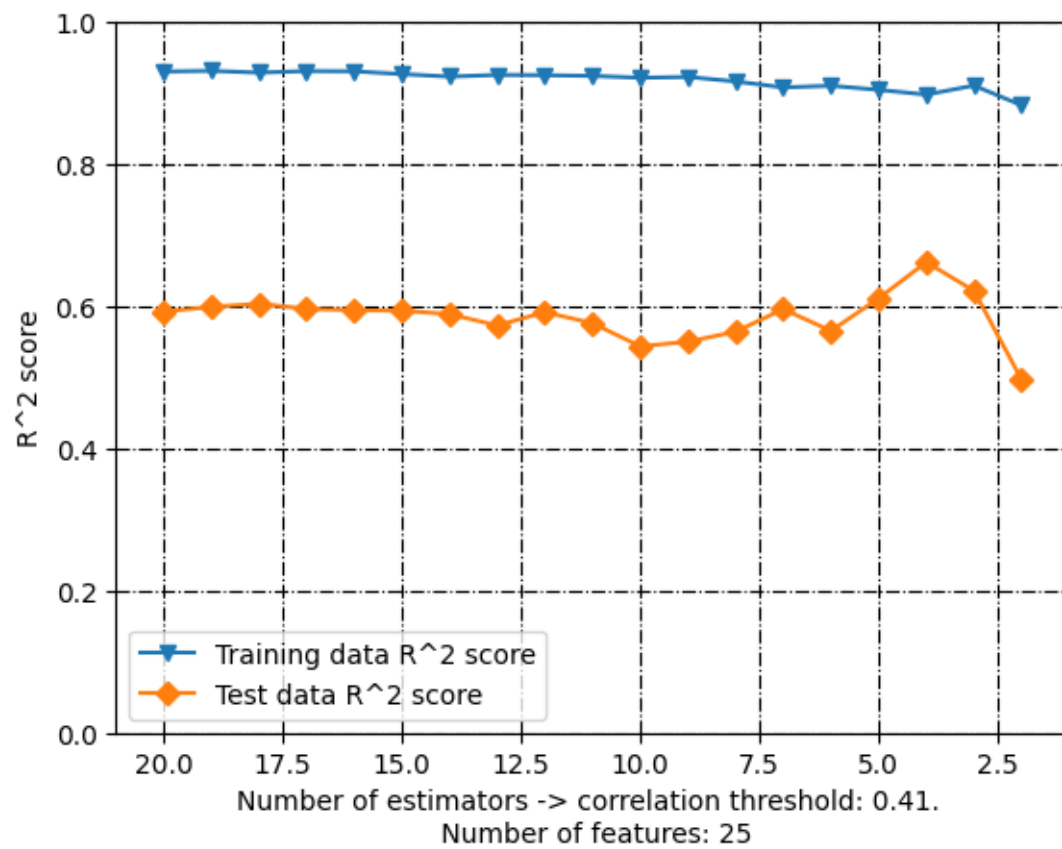

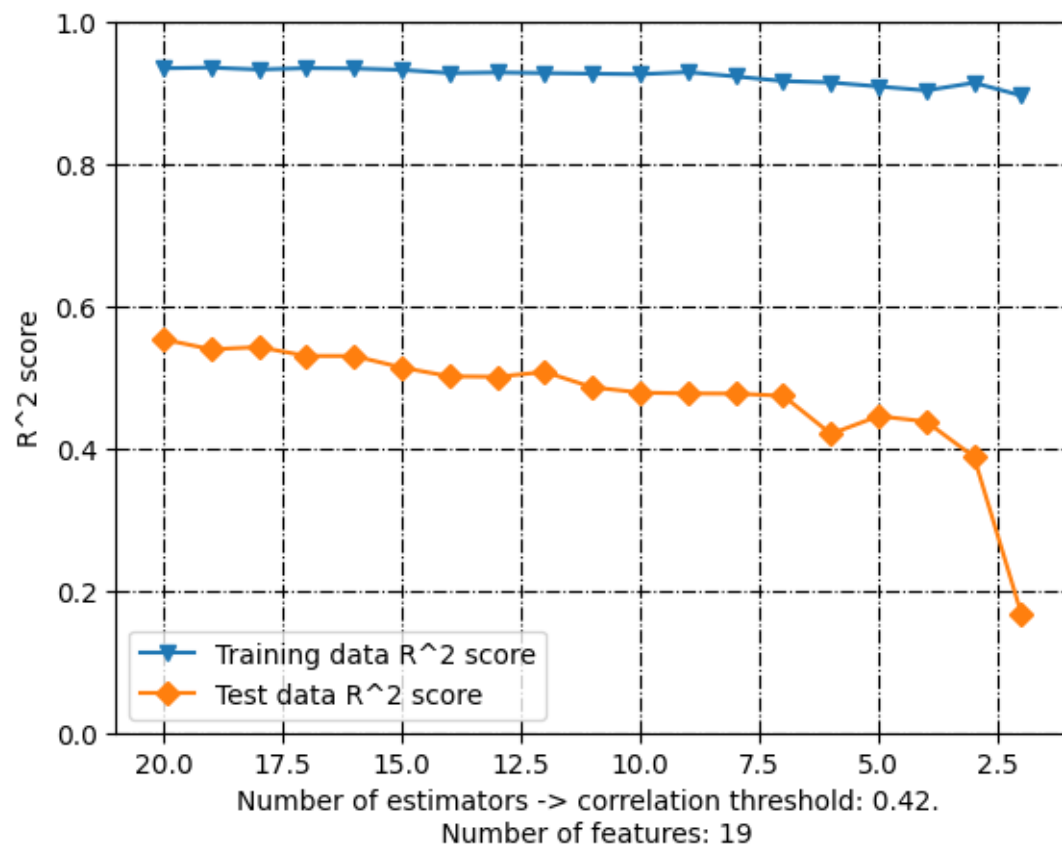

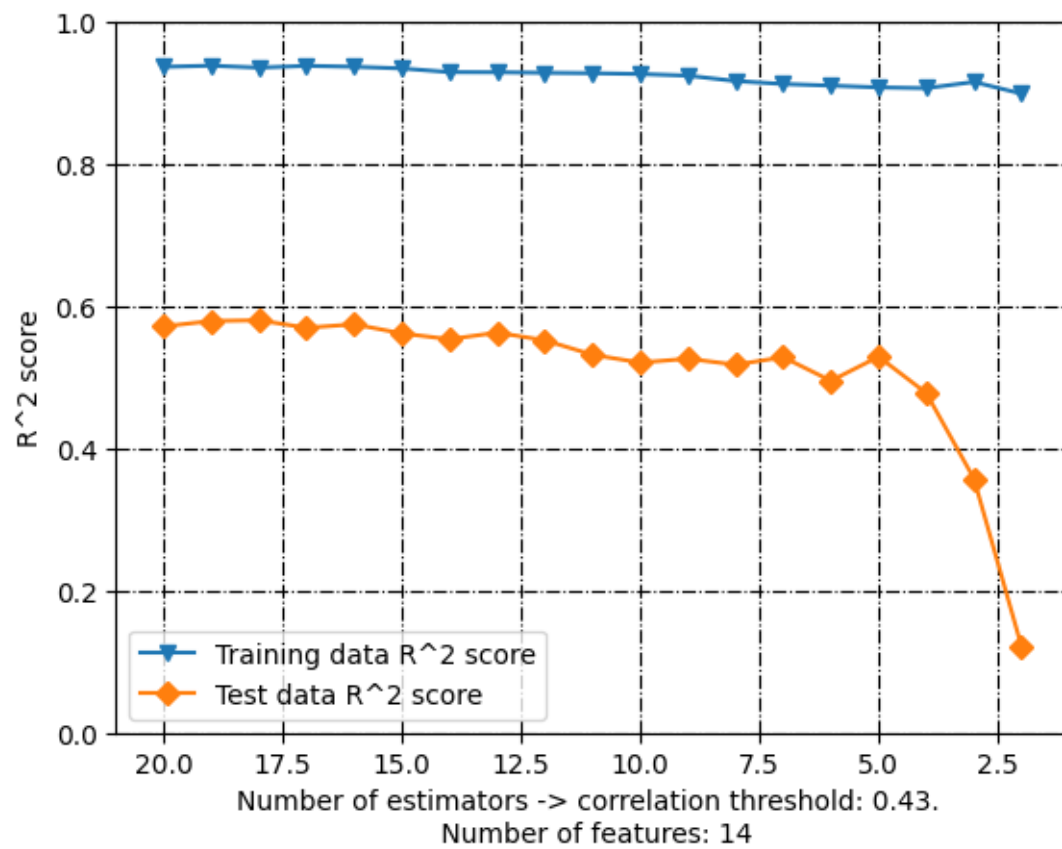

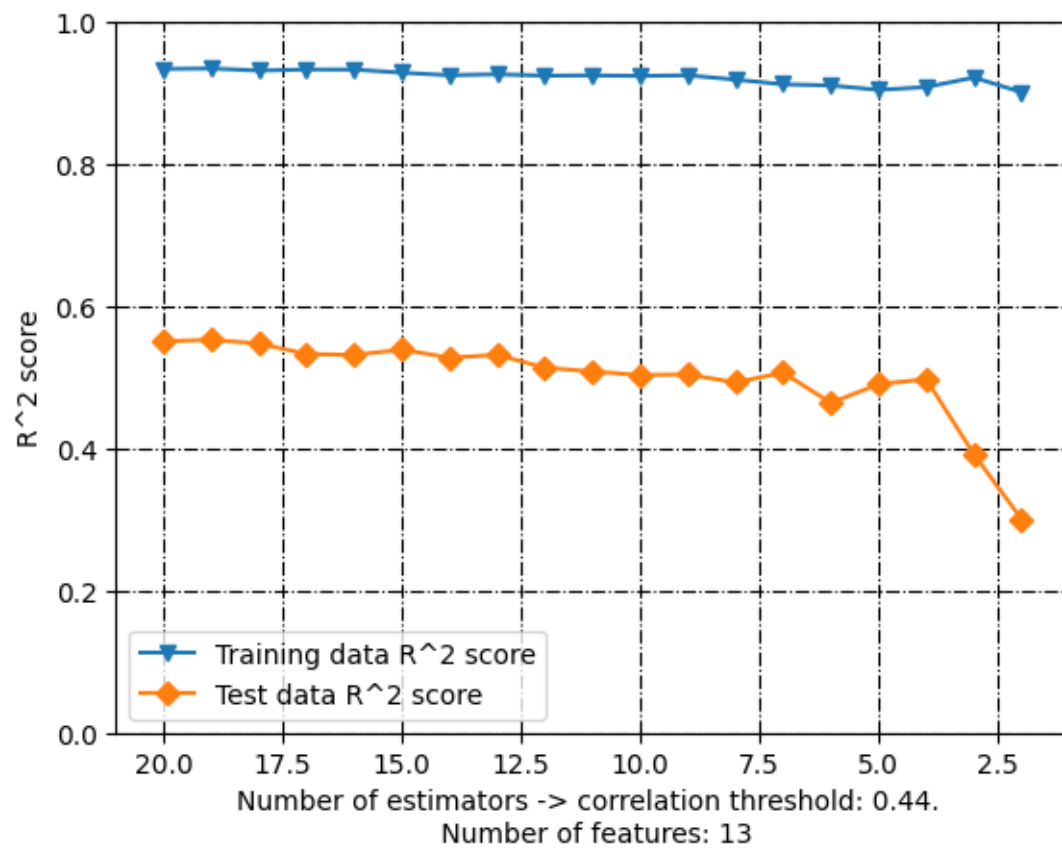

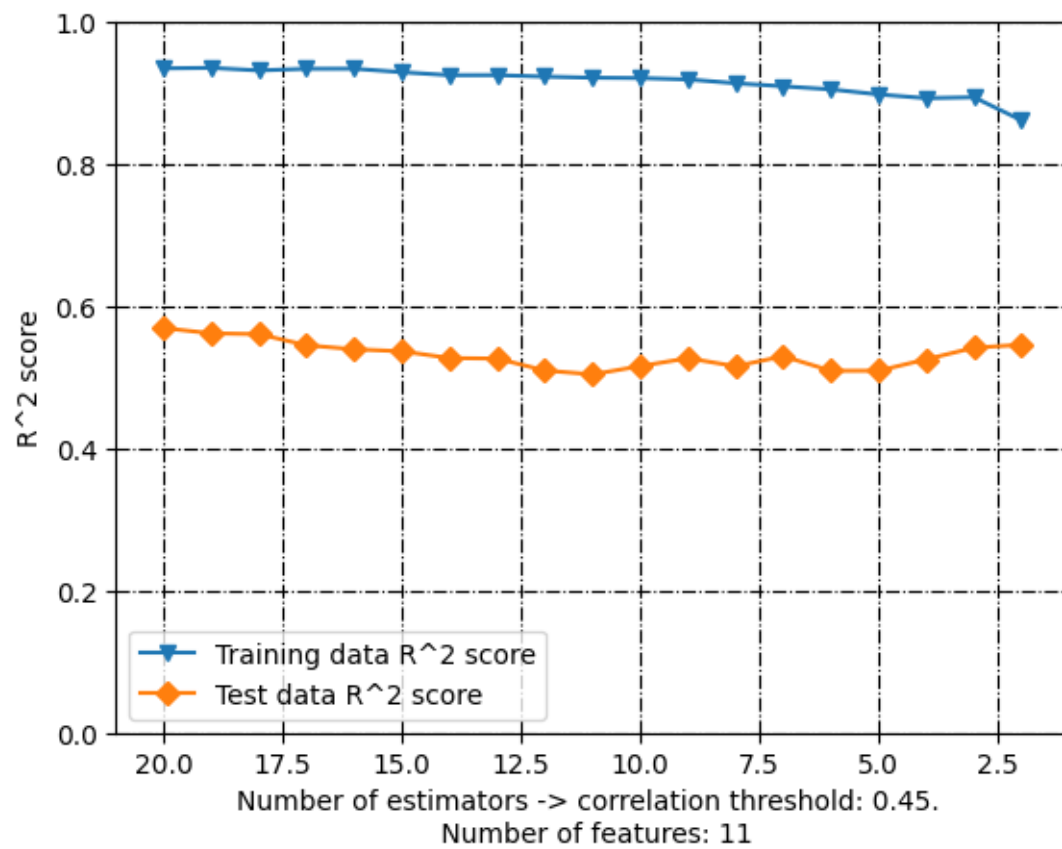

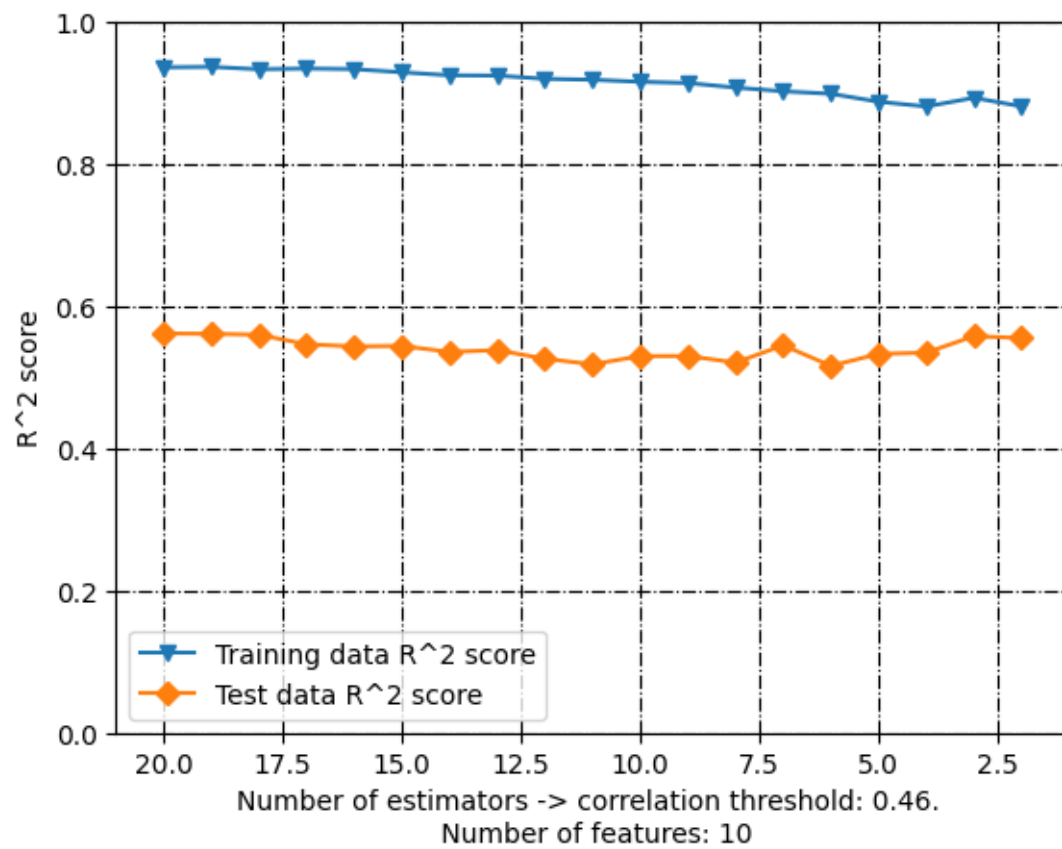



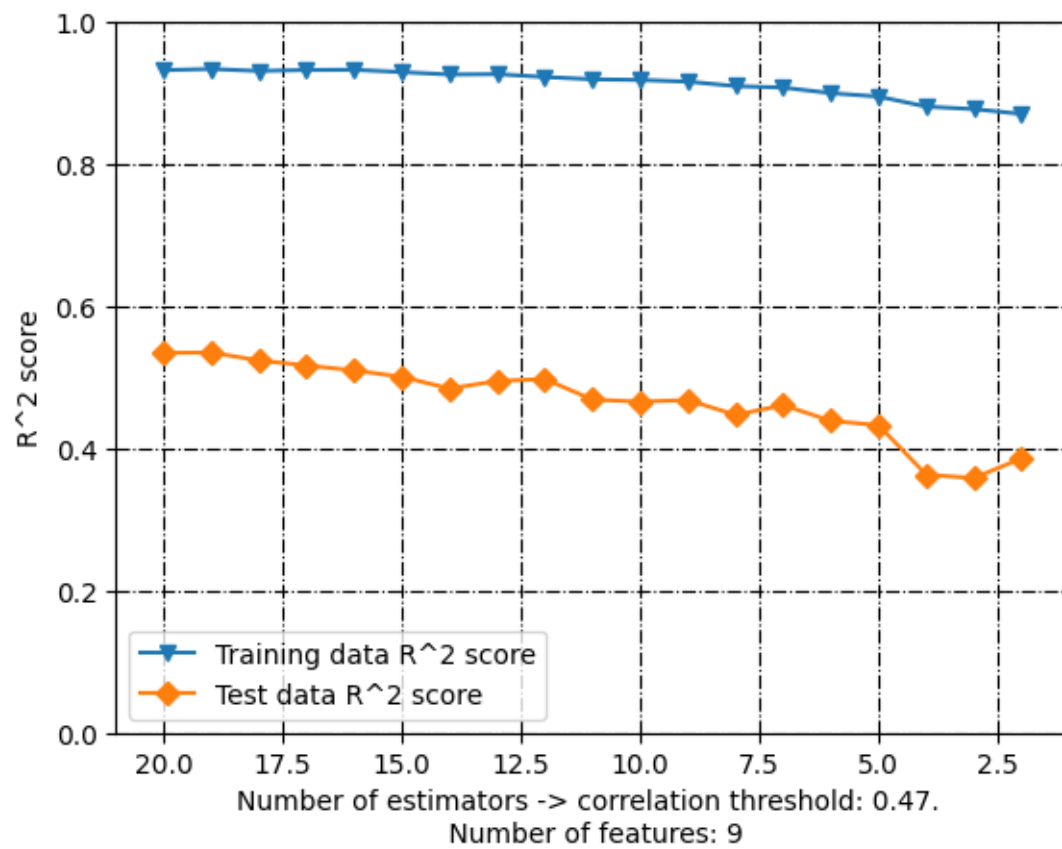

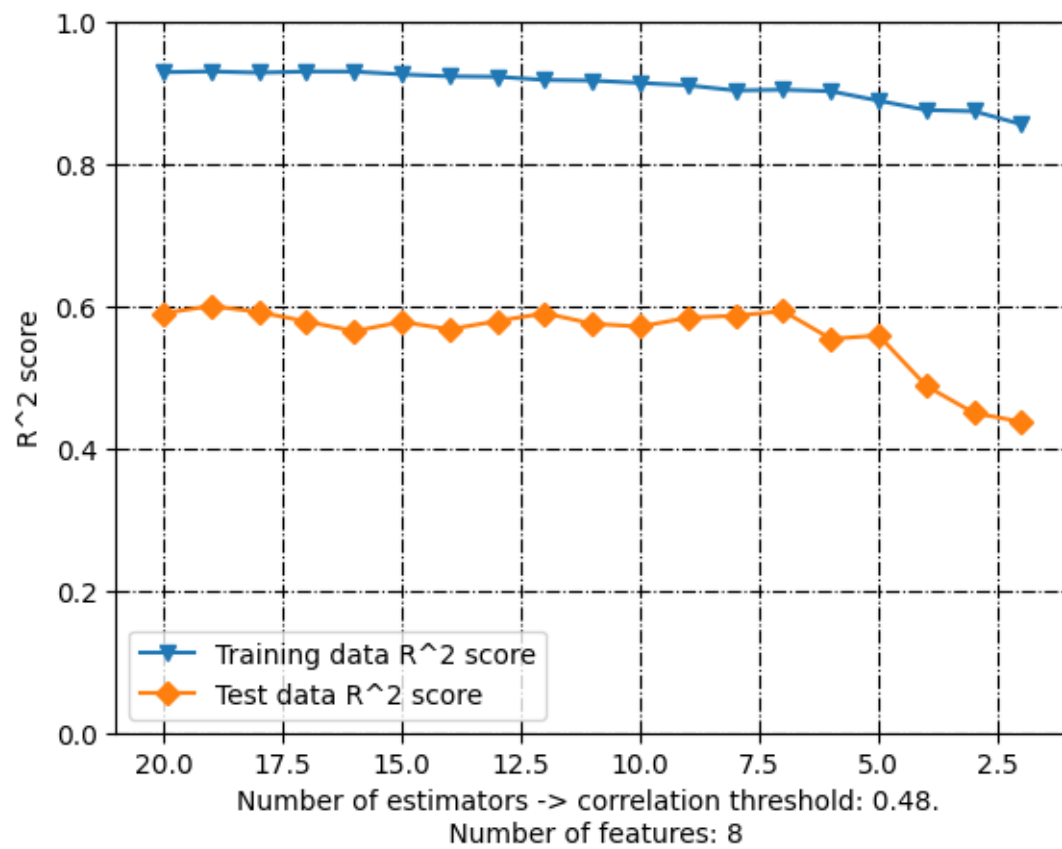

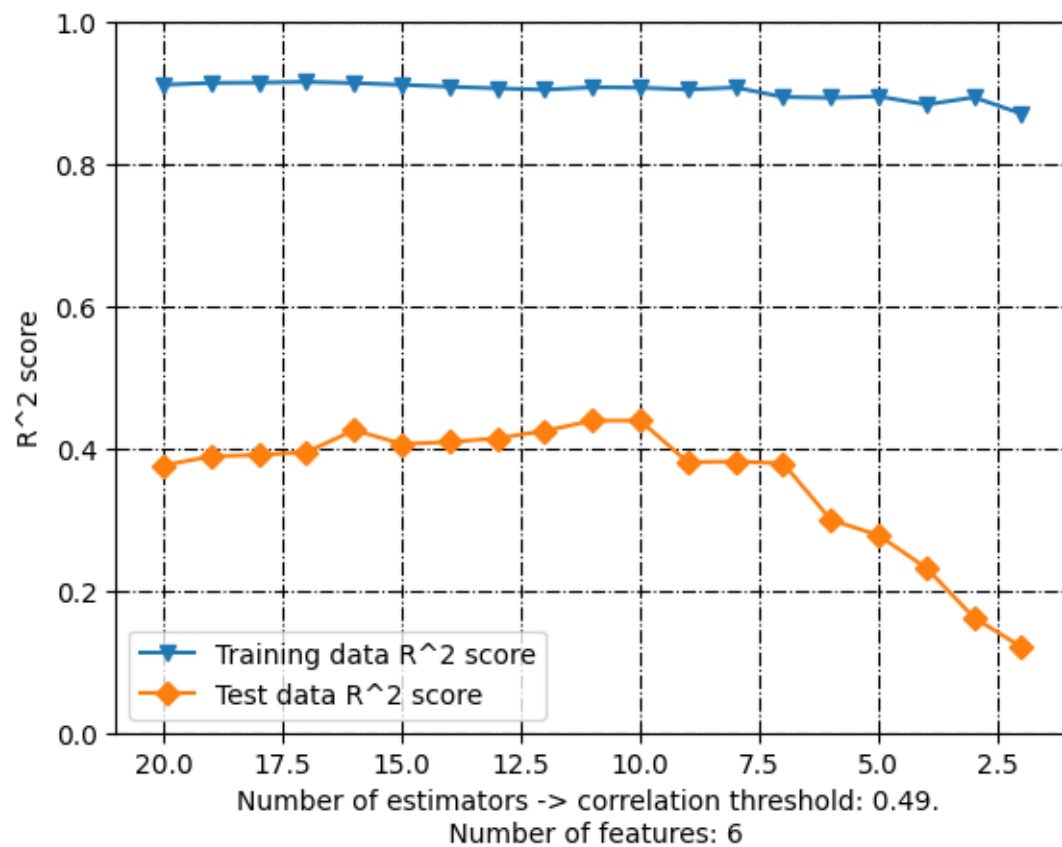

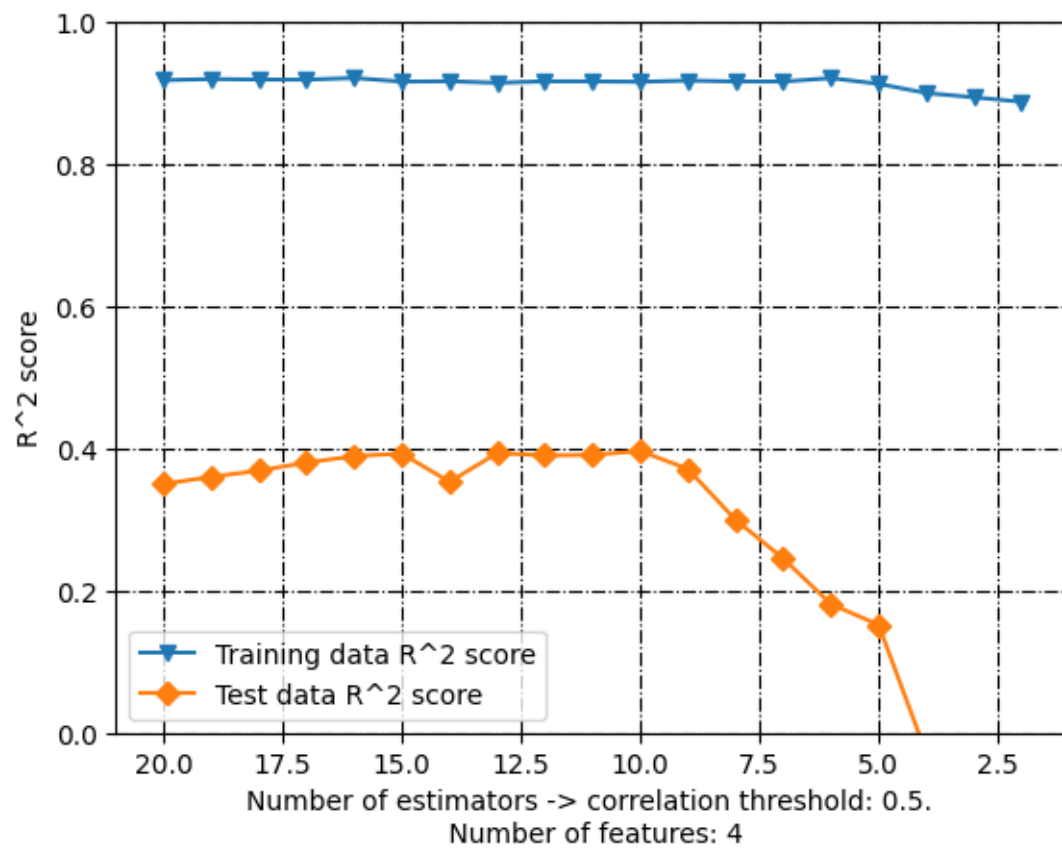

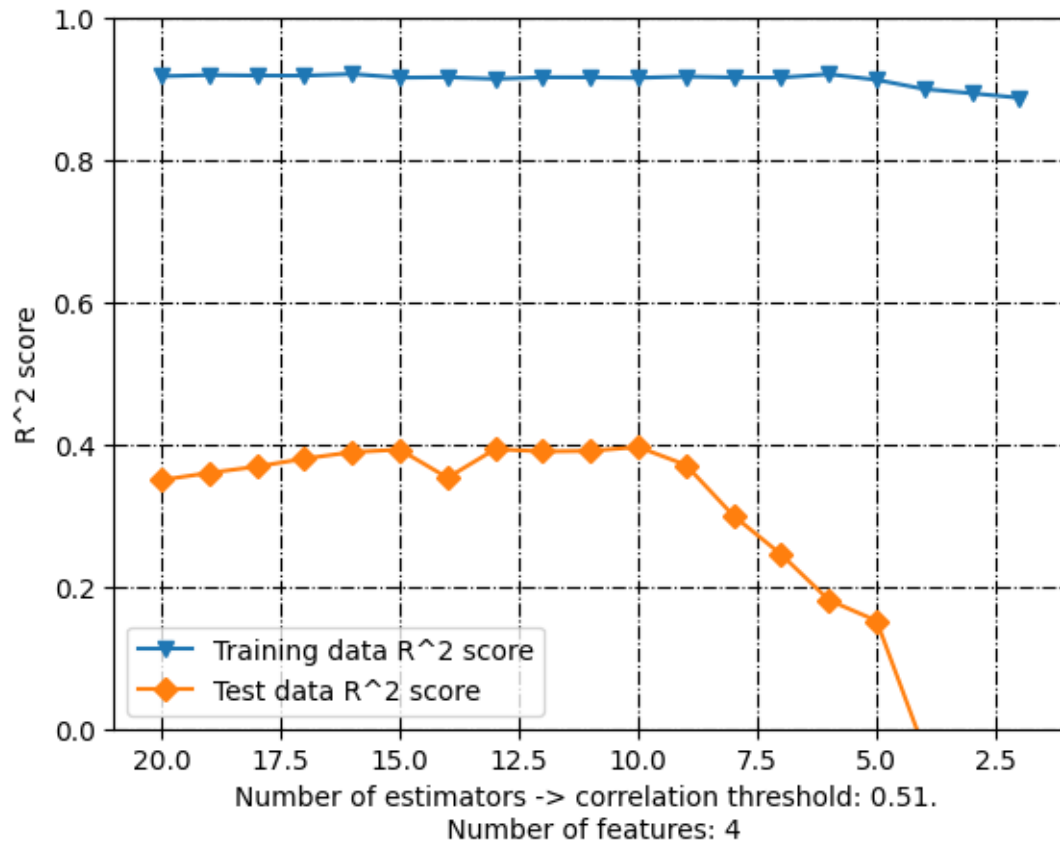

```
[28]: plt.plot(df_without_standardization['Correlation threshold'],  
             df_without_standardization['Number of features'], label = "Number of  
             features", marker='.')  
plt.legend()  
plt.xlabel('Correlation threshold')  
plt.ylabel('Number of features')  
plt.show()
```



[ ]:

## 4 KNeighborsRegressor

```
[29]: without_standardization, train_r2_, test_r2_, hist1, hist2, target_column_name,
      ↪ training_data_RMSE, test_data_RMSE = pred_model.
      ↪ prepare_data_and_create_model(molecular_descriptors_df=data,
      ↪
      ↪         correlation_threshold=0.50,
      ↪
      ↪         standardization=False,
      ↪
      ↪         model_type='KNeighborsRegressor',
      ↪
      ↪         target_column_name = target,
      ↪
      ↪         random_state=random_state,
      ↪
      ↪         train_test_split_=True,
```



verbose=True)



I am not doing standardization...

```
molecular descriptor name
0          AATSOZ
1          AATSOare
2          AATSOd
3          AATSOdv
4          AATSOi
molecular descriptor name  corr_value
0          AATSOZ          -0.038502
1          AATSOare        -0.120847
2          AATSOd           0.041648
3          AATSOdv         -0.115899
4          AATSOi           0.191765
molecular descriptor name  corr_value  absolute correlation value
0          AATSOZ          -0.038502          0.038502
1          AATSOare        -0.120847          0.120847
2          AATSOd           0.041648          0.041648
3          AATSOdv         -0.115899          0.115899
4          AATSOi           0.191765          0.191765
molecular descriptor name  corr_value  absolute correlation value
226          AMID_0        -0.520578          0.520578
505          EState_VSA5   -0.578904          0.578904
506          EState_VSA6    0.519794          0.519794
791          MDEO-12       -0.525441          0.525441
1211         MCF-7         1.000000          1.000000
molecular descriptor name  corr_value  absolute correlation value
226          AMID_0        -0.520578          0.520578
505          EState_VSA5   -0.578904          0.578904
506          EState_VSA6    0.519794          0.519794
791          MDEO-12       -0.525441          0.525441
The model used is: KNeighbors...
Return the coefficient of determination of the prediction:
0.2808374764517442
R^2 score: 0.5177433694804979
Correlation coefficient: 0.7195438620963269
Test data - unseen during training:
R^2 score: 0.2808374764517442
Correlation coefficient: 0.5299410122379133
[8.02265968 7.9714522 6.72714186 8.17774001 5.97853696 8.48530314
 8.48530314 7.80625019 7.56191125 7.84004855 7.76355315 6.75628066
 8.22981393 6.53369885 6.37453322 8.02265968 7.56191125 7.94489513]
44      8.267606
47      8.065502
4       7.032920
55      7.920819
```

```

26      4.998569
64      8.619789
73      7.920819
10      7.987163
40      8.091515
107     7.795880
18      7.074688
62      8.958607
11      8.013228
36      6.108463
89      8.045757
91      9.154902
109     8.086186
0       7.987163

```

Name: MCF-7, dtype: float64

Training Root Mean Square Error: 0.6598004765201537

Testing Root Mean Square Error: 0.8077646252541788

```

[30]: print(target_column_name+str('_transformed'))
      print(hist1[target_column_name].hist())

```

MCF-7\_transformed

AxesSubplot(0.125,0.11;0.775x0.77)





```
[31]: with_standardization, train_r2_, test_r2_, hist1, hist2, target_column_name,
      ↪ training_data_RMSE, test_data_RMSE = pred_model.
      ↪ prepare_data_and_create_model(molecular_descriptors_df=data,
      ↪
      ↪         correlation_threshold=0.50,
      ↪
      ↪         standardization=True,
      ↪
      ↪         model_type='KNeighborsRegressor',
      ↪
      ↪         target_column_name = target,
      ↪
      ↪         random_state=random_state,
      ↪
      ↪         train_test_split_=True,
      ↪
      ↪         verbose=True)
```

I am doing standardization...

|      | molecular descriptor name |            |                            |
|------|---------------------------|------------|----------------------------|
| 0    | AATSOZ                    |            |                            |
| 1    | AATSOare                  |            |                            |
| 2    | AATSOd                    |            |                            |
| 3    | AATSOdv                   |            |                            |
| 4    | AATSOi                    |            |                            |
|      | molecular descriptor name | corr_value |                            |
| 0    | AATSOZ                    | -0.038502  |                            |
| 1    | AATSOare                  | -0.120847  |                            |
| 2    | AATSOd                    | 0.041648   |                            |
| 3    | AATSOdv                   | -0.115899  |                            |
| 4    | AATSOi                    | 0.191765   |                            |
|      | molecular descriptor name | corr_value | absolute correlation value |
| 0    | AATSOZ                    | -0.038502  | 0.038502                   |
| 1    | AATSOare                  | -0.120847  | 0.120847                   |
| 2    | AATSOd                    | 0.041648   | 0.041648                   |
| 3    | AATSOdv                   | -0.115899  | 0.115899                   |
| 4    | AATSOi                    | 0.191765   | 0.191765                   |
|      | molecular descriptor name | corr_value | absolute correlation value |
| 226  | AMID_0                    | -0.520578  | 0.520578                   |
| 505  | EState_VSA5               | -0.578904  | 0.578904                   |
| 506  | EState_VSA6               | 0.519794   | 0.519794                   |
| 791  | MDEO-12                   | -0.525441  | 0.525441                   |
| 1211 | MCF-7                     | 1.000000   | 1.000000                   |
|      | molecular descriptor name | corr_value | absolute correlation value |
| 226  | AMID_0                    | -0.520578  | 0.520578                   |
| 505  | EState_VSA5               | -0.578904  | 0.578904                   |
| 506  | EState_VSA6               | 0.519794   | 0.519794                   |

```

791                MDE0-12    -0.525441                0.525441
The model used is: KNeighbors...
Return the coefficient of determination of the prediction:
0.2808374764517442
R^2 score: 0.5177433694804979
Correlation coefficient: 0.7195438620963269
Test data - unseen during training:
R^2 score: 0.2808374764517442
Correlation coefficient: 0.5299410122379133
[8.02265968  7.9714522  6.72714186  8.17774001  5.97853696  8.48530314
 8.48530314  7.80625019  7.56191125  7.84004855  7.76355315  6.75628066
 8.22981393  6.53369885  6.37453322  8.02265968  7.56191125  7.94489513]
44      8.267606
47      8.065502
4       7.032920
55      7.920819
26      4.998569
64      8.619789
73      7.920819
10      7.987163
40      8.091515
107     7.795880
18      7.074688
62      8.958607
11      8.013228
36      6.108463
89      8.045757
91      9.154902
109     8.086186
0       7.987163
Name: MCF-7, dtype: float64
Training Root Mean Square Error: 0.6598004765201537
Testing Root Mean Square Error: 0.8077646252541788

```

#### 4.1 Search inside correlation space

```

[32]: step = 0.01
      initial_step = corr_low
      last_step = corr_high
      first_list = [x / 100.0 for x in range(int(initial_step*100),
      ↪ int(last_step*100), int(step*100))]
      second_list = []
      third_list = []
      fourth_l = []
      fifth_l = []
      f_list = []
      for i in first_list:

```

```

        without_standardization, train_r2, test_r2, _, h_, target_column_name,
        training_data_RMSE, test_data_RMSE = pred_model.
        prepare_data_and_create_model(molecular_descriptors_df = data,

        correlation_threshold = i,

        standardization = False,

        model_type = 'KNeighborsRegressor',

        target_column_name = target,

        random_state=random_state,

        train_test_split_ = True,

        verbose = False)
    second_list.append(train_r2)
    third_list.append(test_r2)
    fourth_l.append(training_data_RMSE)
    fifth_l.append(test_data_RMSE)
    f_list.append(len(h_))

```

File "C:\Users\aleks\anaconda3\envs\cheminf\_gpu\lib\site-packages\joblib\externals\loky\backend\context.py", line 217, in \_count\_physical\_cores  
 raise ValueError(

```

[33]: df_without_standardization = pd.DataFrame(data=first_list,
        columns=["Correlation threshold"])
df_without_standardization['Training data R^2 score'] = second_list
df_without_standardization['Test data R^2 score'] = third_list
df_without_standardization['Training RMSE'] = fourth_l
df_without_standardization['Test RMSE'] = fifth_l
df_without_standardization['Number of features'] = f_list

```

```

[34]: df_k_nearest = df_without_standardization.copy()
df_without_standardization

```

```

[34]:
Correlation threshold  Training data R^2 score  Test data R^2 score \
0                    0.33                    0.621822          0.246351
1                    0.34                    0.623312          0.246351
2                    0.35                    0.616957          0.243414
3                    0.36                    0.619734          0.310537
4                    0.37                    0.618726          0.338837
5                    0.38                    0.691970          0.601192
6                    0.39                    0.688301          0.599861

```

|    |      |          |          |
|----|------|----------|----------|
| 7  | 0.40 | 0.688301 | 0.592646 |
| 8  | 0.41 | 0.683917 | 0.592893 |
| 9  | 0.42 | 0.577840 | 0.266260 |
| 10 | 0.43 | 0.537940 | 0.159817 |
| 11 | 0.44 | 0.537920 | 0.159817 |
| 12 | 0.45 | 0.537920 | 0.136157 |
| 13 | 0.46 | 0.537023 | 0.162161 |
| 14 | 0.47 | 0.537023 | 0.162161 |
| 15 | 0.48 | 0.535527 | 0.162161 |
| 16 | 0.49 | 0.531239 | 0.296566 |
| 17 | 0.50 | 0.517743 | 0.280837 |
| 18 | 0.51 | 0.517743 | 0.280837 |

|    | Training RMSE | Test RMSE | Number of features |
|----|---------------|-----------|--------------------|
| 0  | 0.584281      | 0.826906  | 84                 |
| 1  | 0.583129      | 0.826906  | 74                 |
| 2  | 0.588027      | 0.828515  | 61                 |
| 3  | 0.585892      | 0.790910  | 50                 |
| 4  | 0.586668      | 0.774507  | 43                 |
| 5  | 0.527315      | 0.601524  | 37                 |
| 6  | 0.530446      | 0.602527  | 29                 |
| 7  | 0.530446      | 0.607935  | 26                 |
| 8  | 0.534163      | 0.607751  | 25                 |
| 9  | 0.617323      | 0.815910  | 19                 |
| 10 | 0.645837      | 0.873088  | 14                 |
| 11 | 0.645851      | 0.873088  | 13                 |
| 12 | 0.645851      | 0.885297  | 11                 |
| 13 | 0.646477      | 0.871869  | 10                 |
| 14 | 0.646477      | 0.871869  | 9                  |
| 15 | 0.647521      | 0.871869  | 8                  |
| 16 | 0.650503      | 0.798883  | 6                  |
| 17 | 0.659800      | 0.807765  | 4                  |
| 18 | 0.659800      | 0.807765  | 4                  |

## 4.2 Plots

```
[35]: plt.plot(df_without_standardization['Correlation threshold'],
             df_without_standardization['Training data R^2 score'], label = "Training
             data R^2 score", marker='v')
plt.plot(df_without_standardization['Correlation threshold'],
             df_without_standardization['Test data R^2 score'], label = "Test data R^2
             score", marker='D')
plt.legend()
plt.xlabel('Correlation threshold')
plt.ylabel('R^2 score')
plt.ylim([0, 1])
plt.show()
```

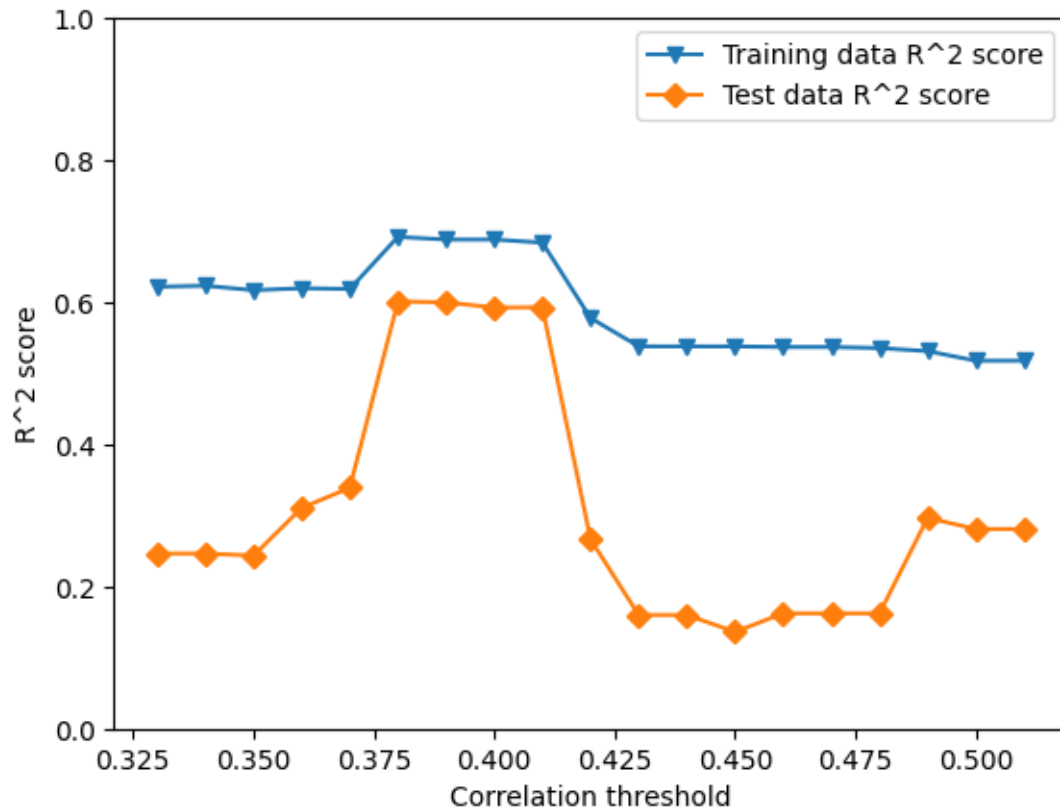

```
[36]: plt.plot(df_without_standardization['Correlation threshold'],
             df_without_standardization['Number of features'], label = "Number of
             features", marker='.')
plt.legend()
plt.xlabel('Correlation threshold')
plt.ylabel('Number of features')
plt.show()
```



[ ]:

## 5 Support Vector Machines (SVM)

```
[37]: without_standardization, train_r2_, test_r2_, hist1, hist2, target_column_name,
      ↪ training_data_RMSE, test_data_RMSE = pred_model.
      ↪ prepare_data_and_create_model(molecular_descriptors_df=data,
      ↪
      ↪         correlation_threshold=0.50,
      ↪
      ↪         standardization=False,
      ↪
      ↪         model_type='SVR',
      ↪
      ↪         kernel_ = 'linear',
      ↪
      ↪         gamma_ = 'auto',
      ↪
      ↪         target_column_name = target,
```

```

↪          random_state=random_state,
↪          train_test_split_=True,
↪          verbose=True)

```

I am not doing standardization...

| molecular descriptor name |          |
|---------------------------|----------|
| 0                         | AATSOZ   |
| 1                         | AATSOare |
| 2                         | AATSOd   |
| 3                         | AATSOdv  |
| 4                         | AATSOi   |

  

| molecular descriptor name | corr_value         |
|---------------------------|--------------------|
| 0                         | AATSOZ -0.038502   |
| 1                         | AATSOare -0.120847 |
| 2                         | AATSOd 0.041648    |
| 3                         | AATSOdv -0.115899  |
| 4                         | AATSOi 0.191765    |

  

| molecular descriptor name | corr_value         | absolute correlation value |
|---------------------------|--------------------|----------------------------|
| 0                         | AATSOZ -0.038502   | 0.038502                   |
| 1                         | AATSOare -0.120847 | 0.120847                   |
| 2                         | AATSOd 0.041648    | 0.041648                   |
| 3                         | AATSOdv -0.115899  | 0.115899                   |
| 4                         | AATSOi 0.191765    | 0.191765                   |

  

| molecular descriptor name | corr_value            | absolute correlation value |
|---------------------------|-----------------------|----------------------------|
| 226                       | AMID_0 -0.520578      | 0.520578                   |
| 505                       | EState_VSA5 -0.578904 | 0.578904                   |
| 506                       | EState_VSA6 0.519794  | 0.519794                   |
| 791                       | MDEO-12 -0.525441     | 0.525441                   |
| 1211                      | MCF-7 1.000000        | 1.000000                   |

  

| molecular descriptor name | corr_value            | absolute correlation value |
|---------------------------|-----------------------|----------------------------|
| 226                       | AMID_0 -0.520578      | 0.520578                   |
| 505                       | EState_VSA5 -0.578904 | 0.578904                   |
| 506                       | EState_VSA6 0.519794  | 0.519794                   |
| 791                       | MDEO-12 -0.525441     | 0.525441                   |

The model used is: SVR...

Return the coefficient of determination of the prediction:

0.4161606958939972

R<sup>2</sup> score: 0.5301711041437702

Correlation coefficient: 0.7281284942534321

Test data - unseen during training:

R<sup>2</sup> score: 0.4161606958939972

Correlation coefficient: 0.6451051820393301

[7.95710679 8.19420823 7.37587573 7.58725734 6.13752633 8.45431951  
8.71877874 7.59489641 8.09716398 8.24770467 7.55125979 6.99273128

```

7.93355344 6.92876717 7.29438534 7.95710329 8.09233701 7.6660344 ]
44      8.267606
47      8.065502
4       7.032920
55      7.920819
26      4.998569
64      8.619789
73      7.920819
10      7.987163
40      8.091515
107     7.795880
18      7.074688
62      8.958607
11      8.013228
36      6.108463
89      8.045757
91      9.154902
109     8.086186
0       7.987163

```

Name: MCF-7, dtype: float64

Training Root Mean Square Error: 0.6512434719413053

Testing Root Mean Square Error: 0.7278099194508179

```

[38]: print(target_column_name+str('_transformed'))
      print(hist1[target_column_name].hist())

```

MCF-7\_transformed

AxesSubplot(0.125,0.11;0.775x0.77)





```
[39]: with_standardization, train_r2_, test_r2_, hist1, hist2, target_column_name,
      ↪ training_data_RMSE, test_data_RMSE = pred_model.
      ↪ prepare_data_and_create_model(molecular_descriptors_df=data,
      ↪
      ↪         correlation_threshold=0.50,
      ↪
      ↪         standardization=True,
      ↪
      ↪         model_type='SVR',
      ↪
      ↪         kernel_ = 'linear',
      ↪
      ↪         gamma_ = 'auto',
      ↪
      ↪         target_column_name = target,
      ↪
      ↪         random_state=random_state,
      ↪
      ↪         train_test_split_=True,
      ↪
      ↪         verbose=True)
```

I am doing standardization...

molecular descriptor name

|   |          |
|---|----------|
| 0 | AATSOZ   |
| 1 | AATSOare |
| 2 | AATSOd   |
| 3 | AATSOdv  |
| 4 | AATSOi   |

|   | molecular descriptor name | corr_value |
|---|---------------------------|------------|
| 0 | AATSOZ                    | -0.038502  |
| 1 | AATSOare                  | -0.120847  |
| 2 | AATSOd                    | 0.041648   |
| 3 | AATSOdv                   | -0.115899  |
| 4 | AATSOi                    | 0.191765   |

|   | molecular descriptor name | corr_value | absolute correlation value |
|---|---------------------------|------------|----------------------------|
| 0 | AATSOZ                    | -0.038502  | 0.038502                   |
| 1 | AATSOare                  | -0.120847  | 0.120847                   |
| 2 | AATSOd                    | 0.041648   | 0.041648                   |
| 3 | AATSOdv                   | -0.115899  | 0.115899                   |
| 4 | AATSOi                    | 0.191765   | 0.191765                   |

|      | molecular descriptor name | corr_value | absolute correlation value |
|------|---------------------------|------------|----------------------------|
| 226  | AMID_0                    | -0.520578  | 0.520578                   |
| 505  | EState_VSA5               | -0.578904  | 0.578904                   |
| 506  | EState_VSA6               | 0.519794   | 0.519794                   |
| 791  | MDEO-12                   | -0.525441  | 0.525441                   |
| 1211 | MCF-7                     | 1.000000   | 1.000000                   |

|     | molecular descriptor name | corr_value | absolute correlation value |
|-----|---------------------------|------------|----------------------------|
| 226 | AMID_0                    | -0.520578  | 0.520578                   |
| 505 | EState_VSA5               | -0.578904  | 0.578904                   |
| 506 | EState_VSA6               | 0.519794   | 0.519794                   |
| 791 | MDEO-12                   | -0.525441  | 0.525441                   |

The model used is: SVR...

Return the coefficient of determination of the prediction:

0.4161606958939972

R<sup>2</sup> score: 0.5301711041437702

Correlation coefficient: 0.7281284942534321

Test data - unseen during training:

R<sup>2</sup> score: 0.4161606958939972

Correlation coefficient: 0.6451051820393301

[7.95710679 8.19420823 7.37587573 7.58725734 6.13752633 8.45431951  
8.71877874 7.59489641 8.09716398 8.24770467 7.55125979 6.99273128  
7.93355344 6.92876717 7.29438534 7.95710329 8.09233701 7.6660344 ]

|    |          |
|----|----------|
| 44 | 8.267606 |
| 47 | 8.065502 |
| 4  | 7.032920 |
| 55 | 7.920819 |
| 26 | 4.998569 |
| 64 | 8.619789 |
| 73 | 7.920819 |

```

10      7.987163
40      8.091515
107     7.795880
18      7.074688
62      8.958607
11      8.013228
36      6.108463
89      8.045757
91      9.154902
109     8.086186
0       7.987163

```

Name: MCF-7, dtype: float64

Training Root Mean Square Error: 0.6512434719413053

Testing Root Mean Square Error: 0.7278099194508179

## 5.1 Search inside correlation space

```

[40]: step = 0.01
      initial_step = corr_low
      last_step = corr_high
      first_list = [x / 100.0 for x in range(int(initial_step*100),
      ↪int(last_step*100), int(step*100))]
      second_list = []
      third_list = []
      fourth_l = []
      fifth_l = []
      f_list = []
      for i in first_list:
          without_standardization, train_r2, test_r2, _, h_, target_column_name,
          ↪training_data_RMSE, test_data_RMSE = pred_model.
          ↪prepare_data_and_create_model(molecular_descriptors_df = data,

          ↪
          ↪correlation_threshold = i,

          ↪
          ↪standardization = False,

          ↪
          ↪model_type = 'SVR',

          ↪
          ↪kernel_ = 'linear',

          ↪
          ↪gamma_ = 'auto',

          ↪
          ↪target_column_name = target,

          ↪
          ↪random_state=random_state,

          ↪
          ↪train_test_split_ = True,

```

```

↪ verbose = False)
second_list.append(train_r2)
third_list.append(test_r2)
fourth_l.append(training_data_RMSE)
fifth_l.append(test_data_RMSE)
f_list.append(len(h_))

```

```

[41]: df_without_standardization = pd.DataFrame(data=first_list,
↪ columns=["Correlation threshold"])
df_without_standardization['Training data R^2 score'] = second_list
df_without_standardization['Test data R^2 score'] = third_list
df_without_standardization['Training RMSE'] = fourth_l
df_without_standardization['Test RMSE'] = fifth_l
df_without_standardization['Number of features'] = f_list

```

```

[42]: df_svm = df_without_standardization.copy()
df_without_standardization

```

```

[42]: Correlation threshold  Training data R^2 score  Test data R^2 score  \
0          0.33          0.699678          0.703930
1          0.34          0.698681          0.714338
2          0.35          0.653574          0.598970
3          0.36          0.619117          0.232309
4          0.37          0.591768          0.076782
5          0.38          0.589794          0.234486
6          0.39          0.584302          0.231231
7          0.40          0.588370          0.317306
8          0.41          0.587545          0.434813
9          0.42          0.560240          0.453842
10         0.43          0.558524          0.438035
11         0.44          0.558364          0.437311
12         0.45          0.553869          0.472323
13         0.46          0.546483          0.405577
14         0.47          0.545600          0.408849
15         0.48          0.547666          0.407742
16         0.49          0.555221          0.381005
17         0.50          0.530171          0.416161
18         0.51          0.530171          0.416161

```

```

Training RMSE  Test RMSE  Number of features
0      0.520676   0.518285             84
1      0.521539   0.509093             74
2      0.559215   0.603198             61
3      0.586367   0.834573             50
4      0.607053   0.915216             43
5      0.608520   0.833389             37

```

|    |          |          |    |
|----|----------|----------|----|
| 6  | 0.612579 | 0.835159 | 29 |
| 7  | 0.609575 | 0.787018 | 26 |
| 8  | 0.610185 | 0.716090 | 25 |
| 9  | 0.630059 | 0.703932 | 19 |
| 10 | 0.631287 | 0.714046 | 14 |
| 11 | 0.631402 | 0.714505 | 13 |
| 12 | 0.634607 | 0.691919 | 11 |
| 13 | 0.639839 | 0.734377 | 10 |
| 14 | 0.640461 | 0.732353 | 9  |
| 15 | 0.639003 | 0.733038 | 8  |
| 16 | 0.633644 | 0.749402 | 6  |
| 17 | 0.651243 | 0.727810 | 4  |
| 18 | 0.651243 | 0.727810 | 4  |

## 5.2 Plots

```
[43]: plt.plot(df_without_standardization['Correlation threshold'],
             df_without_standardization['Training data R^2 score'], label = "Training
             data R^2 score", marker='v')
plt.plot(df_without_standardization['Correlation threshold'],
             df_without_standardization['Test data R^2 score'], label = "Test data R^2
             score", marker='D')
plt.legend()
plt.xlabel('Correlation threshold')
plt.ylabel('R^2 score')
plt.ylim([0, 1])
plt.show()
```

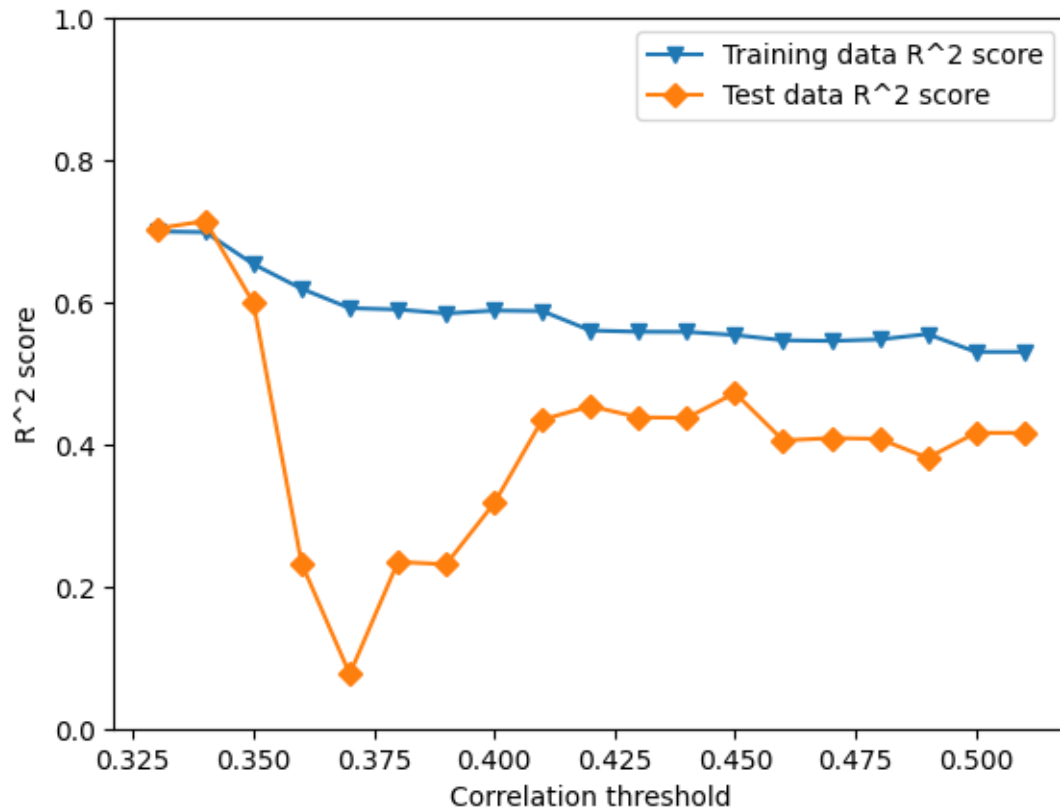

```
[44]: plt.plot(df_without_standardization['Correlation threshold'],
            df_without_standardization['Number of features'], label = "Number of
            features", marker='.')
plt.legend()
plt.xlabel('Correlation threshold')
plt.ylabel('Number of features')
plt.show()
```



### 5.3 Store quality measurements

```
[45]: with pd.ExcelWriter('../Data/Quality_'+str(target)+'_'+str(random_state)+'_'.  
      ↪ 'xlsx') as writer:  
      df_linear.to_excel(writer, sheet_name='MLR')  
      df_decision_tree.to_excel(writer, sheet_name='DT')  
      df_random_forest.to_excel(writer, sheet_name='RF')  
      df_k_nearest.to_excel(writer, sheet_name='KNN')  
      df_svm.to_excel(writer, sheet_name='SVM')
```

# Notebook

January 18, 2024

## 1 File 30

```
[1]: import glob
import pandas as pd
import matplotlib.pyplot as plt
import numpy as np
SMALL_SIZE = 16
MEDIUM_SIZE = 18
BIGGER_SIZE = 20

plt.rc('font', size=SMALL_SIZE)          # controls default text sizes
plt.rc('axes', titlesize=SMALL_SIZE)     # fontsize of the axes title
plt.rc('axes', labelsiz=SMALL_SIZE)      # fontsize of the x and y labels
plt.rc('xtick', labelsiz=SMALL_SIZE)     # fontsize of the tick labels
plt.rc('ytick', labelsiz=SMALL_SIZE)     # fontsize of the tick labels
plt.rc('legend', fontsize=SMALL_SIZE)    # legend fontsize
plt.rc('figure', titlesize=BIGGER_SIZE)  # fontsize of the figure title

[2]: sheet_names = ['MLR', 'DT', 'RF', 'KNN', 'SVM']
x_ticks = ['MLR train R', 'MLR test R', 'DT train R', 'DT test R', 'RF train R',
            'RF test R', 'KNN train R', 'KNN test R', 'SVM train R', 'SVM test R']
random_states = [15, 28, 42]

[3]: def prepare_histogram_data(target_name, max_number_of_features):

    excel_files = []

    for name in glob.glob('../Data/Quality_'+str(target_name)+'*'):
        excel_files.append(name)

    random_state_15 = []
    random_state_28 = []
    random_state_42 = []
    features_15 = []
    features_28 = []
    features_42 = []
    random_states = [15, 28, 42]
```



```

for random_state in range(len(random_states)):
    tmp = []
    to_plot = []
    values = []
    number_of_features = []
    for sheet in sheet_names:
        tmp.append(pd.read_excel(excel_files[random_state],
↪sheet_name=sheet))
        for data in tmp:
            temp = data[data['Number of features'] <= max_number_of_features]
            to_plot.append(temp[temp['Test data R^2 score'] == max(temp['Test_
↪data R^2 score'])])
        for value in to_plot:
            values.append(value['Training data R^2 score'].tail(1))
            values.append(value['Test data R^2 score'].tail(1))
            number_of_features.append(value['Number of features'].tail(1))
        for element in values:
            if random_state == 0:
                random_state_15.append(float(element))
            elif random_state == 1:
                random_state_28.append(float(element))
            elif random_state == 2:
                random_state_42.append(float(element))
            else:
                print("Error with conditions...")

    for features in number_of_features:
        if random_state == 0:
            features_15.append(float(features))
        elif random_state == 1:
            features_28.append(float(features))
        elif random_state == 2:
            features_42.append(float(features))
        else:
            print("Error with conditions...")

    return random_state_15, random_state_28, random_state_42, features_15,
↪features_28, features_42

```

```

[4]: def handle_negative_corr(list_):
    res = []
    for element in list_:
        if element < 0:
            res.append(0.01)
        else:

```

```

        res.append(np.sqrt(element))
    return res

```

```

[5]: def prepare_plot(data, name, max_number_of_features):

    fig = plt.figure(figsize=(20,10))
    X = x_ticks
    y_15 = handle_negative_corr(data[0])
    y_28 = handle_negative_corr(data[1])
    y_42 = handle_negative_corr(data[2])

    X_axis = np.arange(len(X))
    y_ax = [x/100 for x in range(0, 105, 5)]
    plt.yticks(y_ax)
    plt.bar(X_axis - 0.2, y_15, 0.2, label = 'Random state 15')
    plt.bar(X_axis + 0.0, y_28, 0.2, label = 'Random state 28')
    plt.bar(X_axis + 0.2, y_42, 0.2, label = 'Random state 42')

    plt.xticks(X_axis, X, weight='bold', fontsize=14)
    plt.xlabel("Methodology", fontsize=20, weight='bold')
    plt.ylabel("Correlation coefficient", fontsize=18, weight='bold')
    plt.ylim([0.0, 1.0])
    plt.title("Quality of each methodology - "+str(name)+' '+str('max number of_
↪features: '+str(max_number_of_features)), fontsize=24, weight='bold')
    plt.grid(visible=True)
    plt.legend()
    plt.savefig('Figures/'+str(name)+'_'+str(max_number_of_features)+'_'+'.
↪pdf', bbox_inches='tight') #new line
    plt.show()
    for i, state in enumerate(random_states):
        print('Random state - '+str(state)+'_
↪'+str(update_description(sheet_names, data[i+3])))

```

```

[6]: def update_description(x_axis_labels, number_of_features):

    MLR = str(x_axis_labels[0])+' - number of features used:
↪'+str(number_of_features[0])
    DT = str(x_axis_labels[1])+' - number of features used:
↪'+str(number_of_features[1])
    RF = str(x_axis_labels[2])+' - number of features used:
↪'+str(number_of_features[2])
    KNN = str(x_axis_labels[3])+' - number of features used:
↪'+str(number_of_features[3])
    SVM = str(x_axis_labels[4])+' - number of features used:
↪'+str(number_of_features[4])

```

```
return MLR, DT, RF, KNN, SVM
```

## 1.1 A549

```
[7]: a549 = prepare_histogram_data('A549', 8)
```

```
[8]: a549
```

```
[8]: ([0.4280888527210002,  
      0.6266334128725354,  
      0.8466334342142815,  
      0.7153113378079368,  
      0.9249742021818756,  
      0.7525559593594799,  
      0.5819621881074415,  
      0.8307821665232054,  
      0.4153462878154097,  
      0.5885571370707737],  
      [0.538457470613332,  
      0.4261368142722509,  
      0.8170806259589886,  
      0.4076872049316587,  
      0.8930162932196327,  
      0.800771797336556,  
      0.6790766967915924,  
      0.1008539619720636,  
      0.4984934257197747,  
      0.4089742856265142],  
      [0.4548140725424477,  
      0.4923632130931052,  
      0.8796761209043098,  
      0.5671139561031637,  
      0.9141127094423355,  
      0.5770141099401139,  
      0.575237291235299,  
      0.4548654061537126,  
      0.4142337951213418,  
      0.4458030446072588],  
      [3.0, 5.0, 8.0, 8.0, 5.0],  
      [8.0, 7.0, 8.0, 8.0, 8.0],  
      [3.0, 8.0, 7.0, 3.0, 3.0])
```

```
[9]: for i in range(8, 3, -1):  
      a549 = prepare_histogram_data('A549', i)  
      prepare_plot(a549, 'A549', i)
```

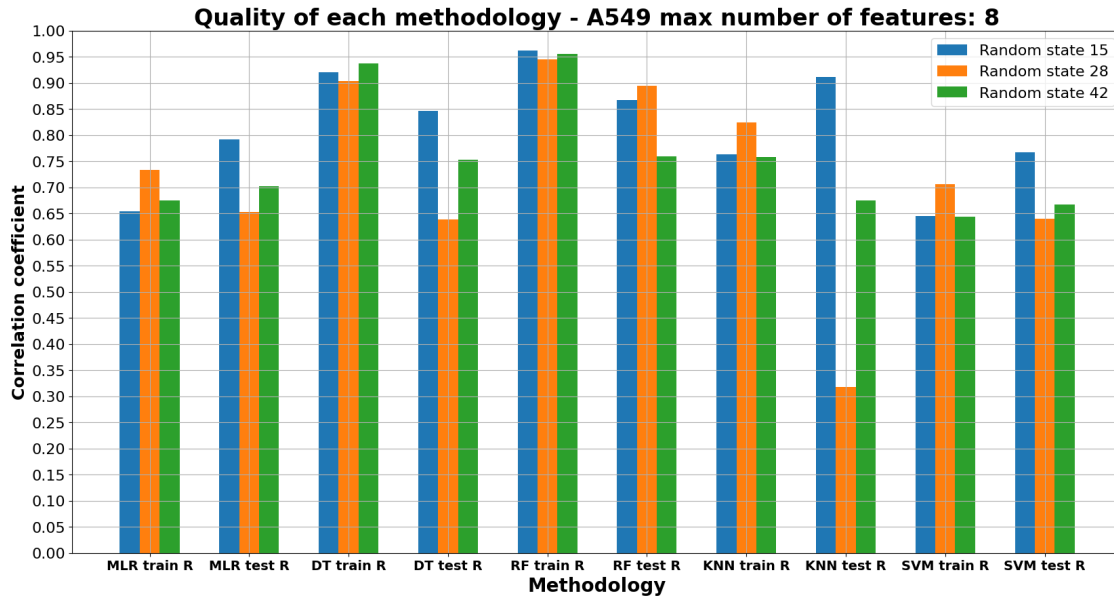

Random state - 15 ('MLR - number of features used: 3.0', 'DT - number of features used: 5.0', 'RF - number of features used: 8.0', 'KNN - number of features used: 8.0', 'SVM - number of features used: 5.0')

Random state - 28 ('MLR - number of features used: 8.0', 'DT - number of features used: 7.0', 'RF - number of features used: 8.0', 'KNN - number of features used: 8.0', 'SVM - number of features used: 8.0')

Random state - 42 ('MLR - number of features used: 3.0', 'DT - number of features used: 8.0', 'RF - number of features used: 7.0', 'KNN - number of features used: 3.0', 'SVM - number of features used: 3.0')

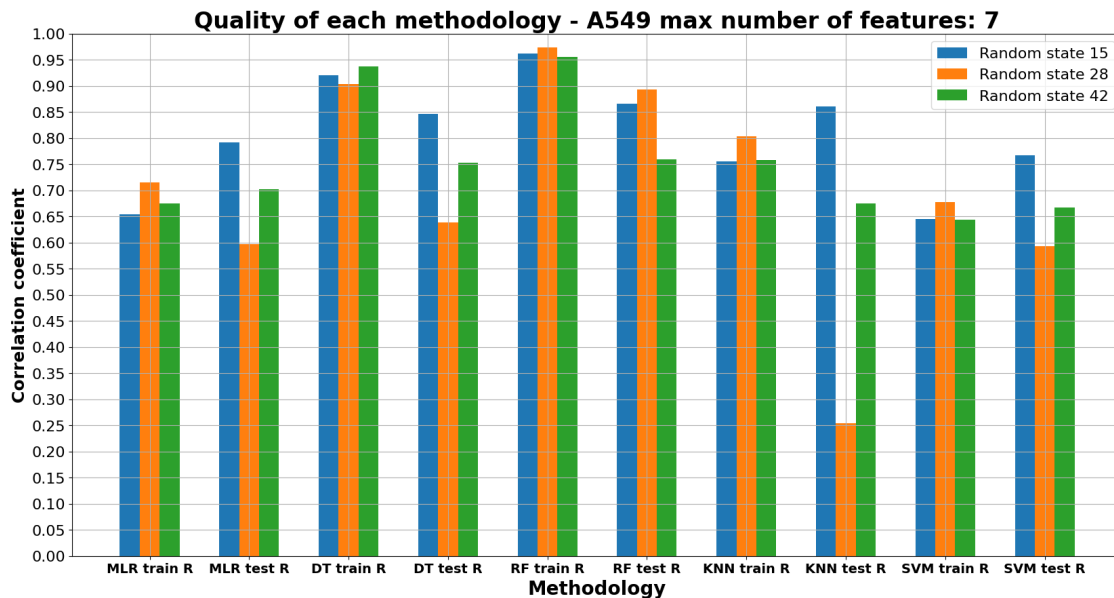

Random state - 15 ('MLR - number of features used: 3.0', 'DT - number of features used: 5.0', 'RF - number of features used: 7.0', 'KNN - number of features used: 7.0', 'SVM - number of features used: 5.0')

Random state - 28 ('MLR - number of features used: 7.0', 'DT - number of features used: 7.0', 'RF - number of features used: 7.0', 'KNN - number of features used: 7.0', 'SVM - number of features used: 7.0')

Random state - 42 ('MLR - number of features used: 3.0', 'DT - number of features used: 7.0', 'RF - number of features used: 7.0', 'KNN - number of features used: 3.0', 'SVM - number of features used: 3.0')

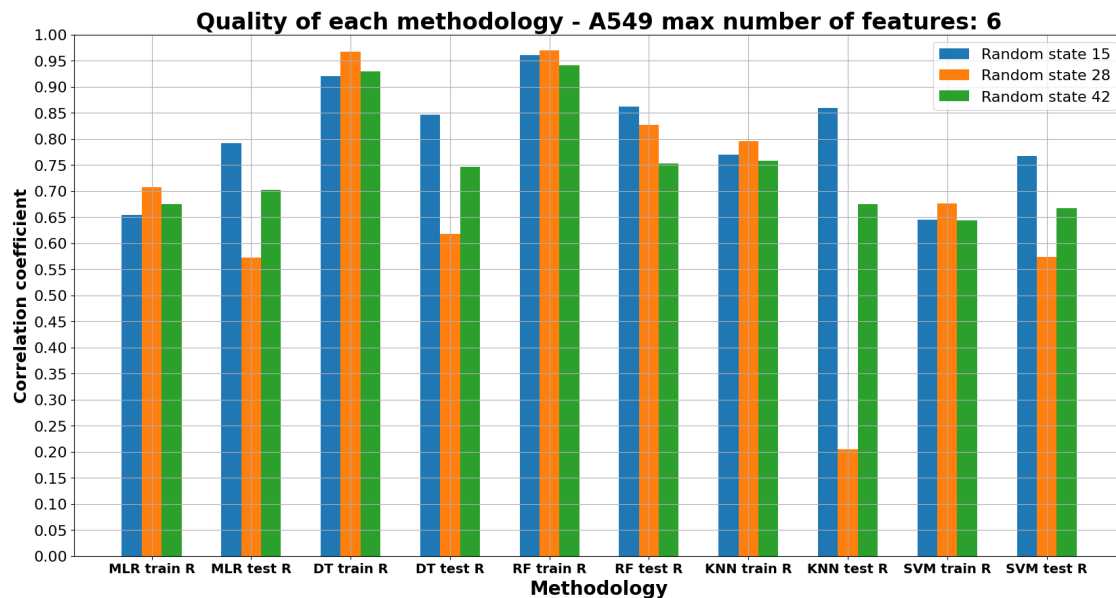

Random state - 15 ('MLR - number of features used: 3.0', 'DT - number of features used: 5.0', 'RF - number of features used: 5.0', 'KNN - number of features used: 5.0', 'SVM - number of features used: 5.0')

Random state - 28 ('MLR - number of features used: 4.0', 'DT - number of features used: 4.0', 'RF - number of features used: 5.0', 'KNN - number of features used: 5.0', 'SVM - number of features used: 5.0')

Random state - 42 ('MLR - number of features used: 3.0', 'DT - number of features used: 5.0', 'RF - number of features used: 5.0', 'KNN - number of features used: 3.0', 'SVM - number of features used: 3.0')

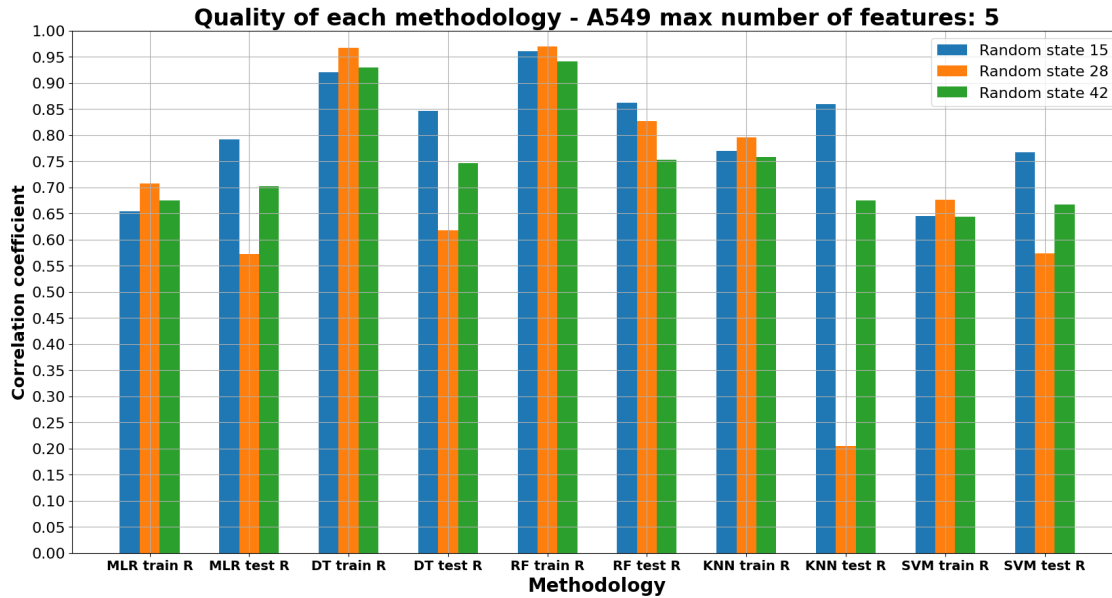

Random state - 15 ('MLR - number of features used: 3.0', 'DT - number of features used: 5.0', 'RF - number of features used: 5.0', 'KNN - number of features used: 5.0', 'SVM - number of features used: 5.0')

Random state - 28 ('MLR - number of features used: 4.0', 'DT - number of features used: 4.0', 'RF - number of features used: 5.0', 'KNN - number of features used: 5.0', 'SVM - number of features used: 5.0')

Random state - 42 ('MLR - number of features used: 3.0', 'DT - number of features used: 5.0', 'RF - number of features used: 5.0', 'KNN - number of features used: 3.0', 'SVM - number of features used: 3.0')

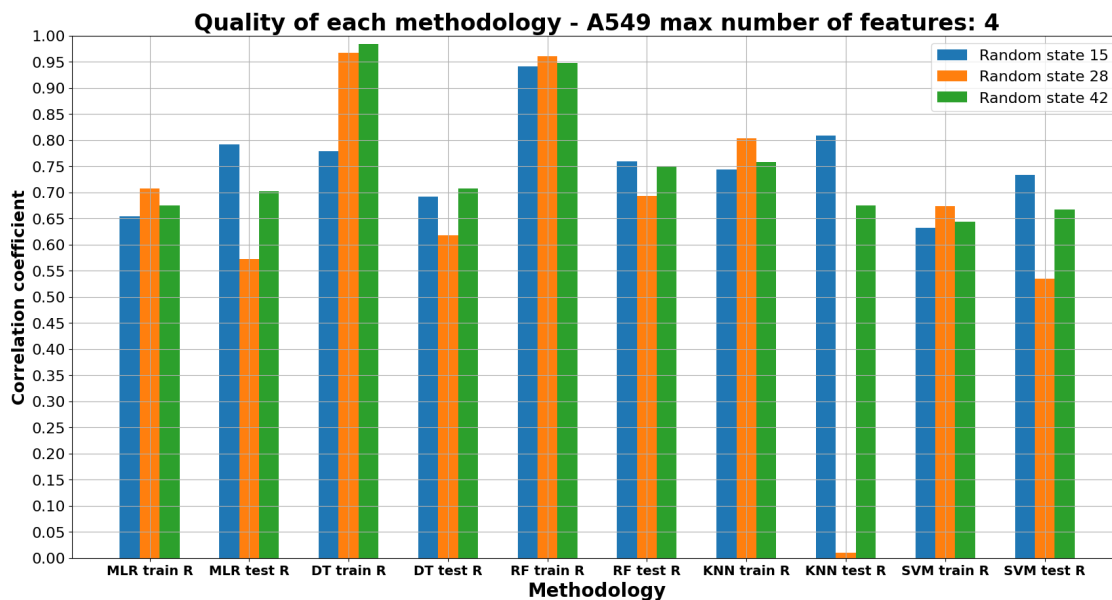

Random state - 15 ('MLR - number of features used: 3.0', 'DT - number of features used: 3.0', 'RF - number of features used: 4.0', 'KNN - number of features used: 3.0', 'SVM - number of features used: 3.0')

Random state - 28 ('MLR - number of features used: 4.0', 'DT - number of features used: 4.0', 'RF - number of features used: 4.0', 'KNN - number of features used: 4.0', 'SVM - number of features used: 4.0')

Random state - 42 ('MLR - number of features used: 3.0', 'DT - number of features used: 3.0', 'RF - number of features used: 3.0', 'KNN - number of features used: 3.0', 'SVM - number of features used: 3.0')

[ ]:

## 1.2 MCF-7

```
[10]: for i in range(8, 3, -1):
      mcf7 = prepare_histogram_data('MCF-7', i)
      prepare_plot(mcf7, 'MCF-7', i)
```

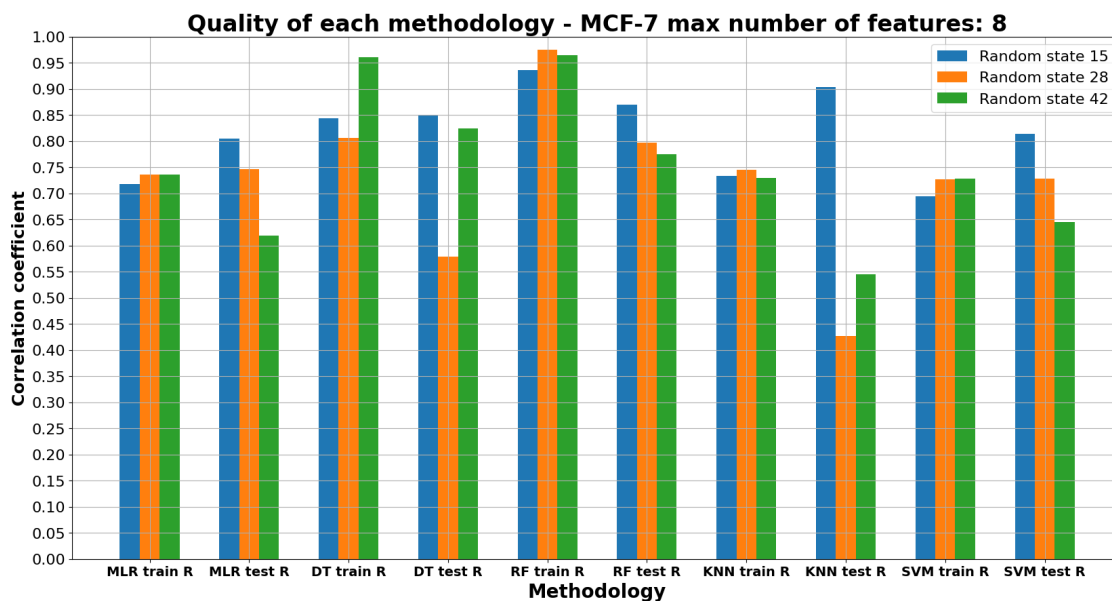

Random state - 15 ('MLR - number of features used: 8.0', 'DT - number of features used: 6.0', 'RF - number of features used: 8.0', 'KNN - number of features used: 8.0', 'SVM - number of features used: 4.0')

Random state - 28 ('MLR - number of features used: 6.0', 'DT - number of features used: 4.0', 'RF - number of features used: 8.0', 'KNN - number of features used: 6.0', 'SVM - number of features used: 8.0')

Random state - 42 ('MLR - number of features used: 4.0', 'DT - number of features used: 8.0', 'RF - number of features used: 8.0', 'KNN - number of features used: 6.0', 'SVM - number of features used: 4.0')

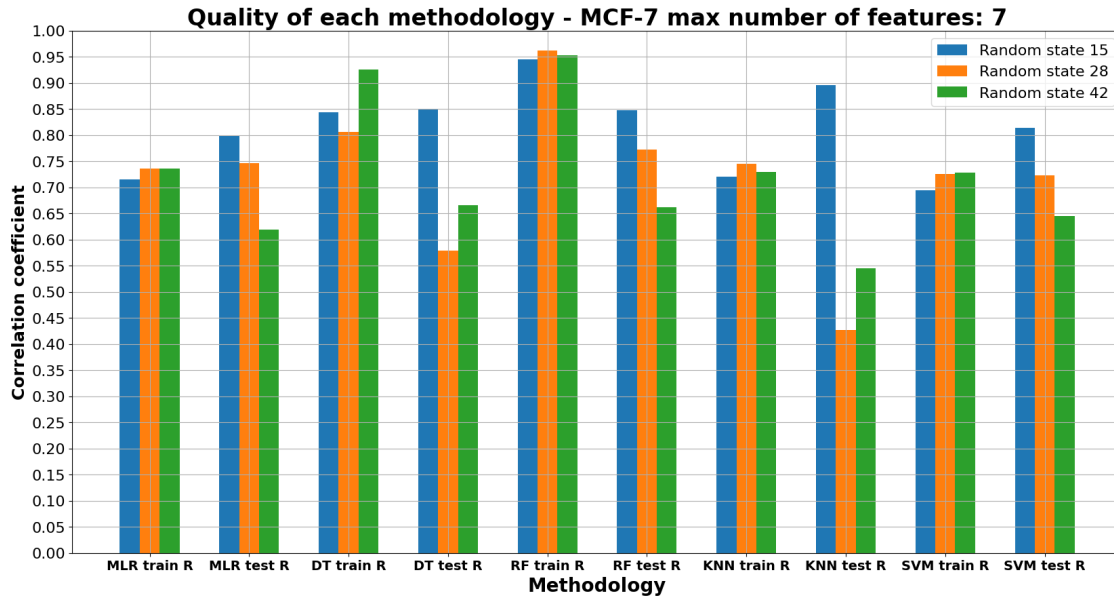

Random state - 15 ('MLR - number of features used: 6.0', 'DT - number of features used: 6.0', 'RF - number of features used: 6.0', 'KNN - number of features used: 6.0', 'SVM - number of features used: 4.0')

Random state - 28 ('MLR - number of features used: 6.0', 'DT - number of features used: 4.0', 'RF - number of features used: 6.0', 'KNN - number of features used: 6.0', 'SVM - number of features used: 6.0')

Random state - 42 ('MLR - number of features used: 4.0', 'DT - number of features used: 6.0', 'RF - number of features used: 6.0', 'KNN - number of features used: 6.0', 'SVM - number of features used: 4.0')

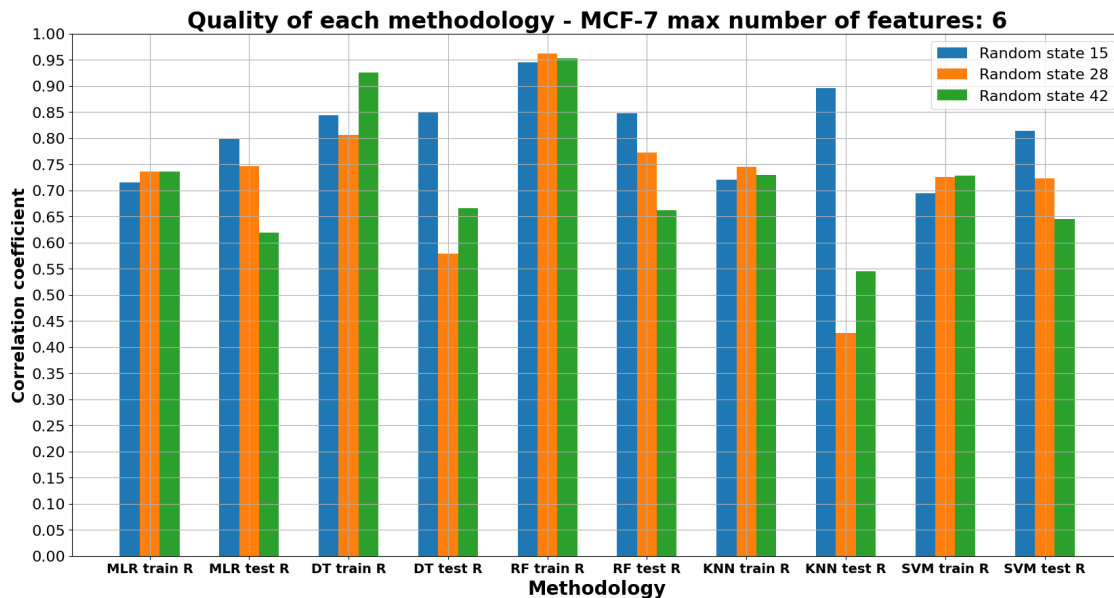



Random state - 15 ('MLR - number of features used: 6.0', 'DT - number of features used: 6.0', 'RF - number of features used: 6.0', 'KNN - number of features used: 6.0', 'SVM - number of features used: 4.0')

Random state - 28 ('MLR - number of features used: 6.0', 'DT - number of features used: 4.0', 'RF - number of features used: 6.0', 'KNN - number of features used: 6.0', 'SVM - number of features used: 6.0')

Random state - 42 ('MLR - number of features used: 4.0', 'DT - number of features used: 6.0', 'RF - number of features used: 6.0', 'KNN - number of features used: 6.0', 'SVM - number of features used: 4.0')

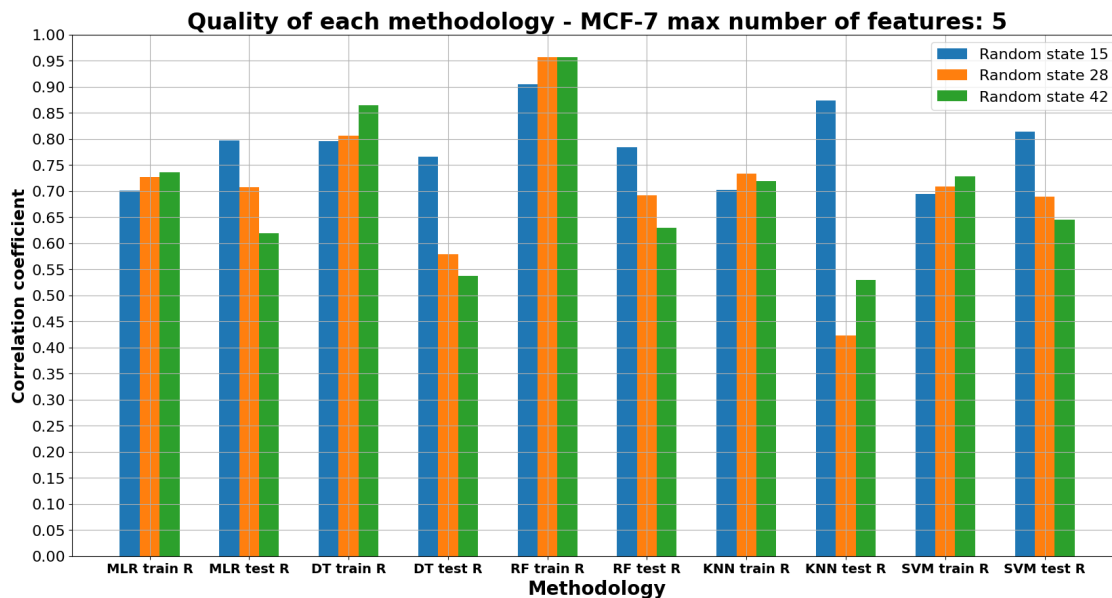

Random state - 15 ('MLR - number of features used: 4.0', 'DT - number of features used: 4.0', 'RF - number of features used: 4.0', 'KNN - number of features used: 4.0', 'SVM - number of features used: 4.0')

Random state - 28 ('MLR - number of features used: 4.0', 'DT - number of features used: 4.0', 'RF - number of features used: 4.0', 'KNN - number of features used: 4.0', 'SVM - number of features used: 4.0')

Random state - 42 ('MLR - number of features used: 4.0', 'DT - number of features used: 4.0', 'RF - number of features used: 4.0', 'KNN - number of features used: 4.0', 'SVM - number of features used: 4.0')

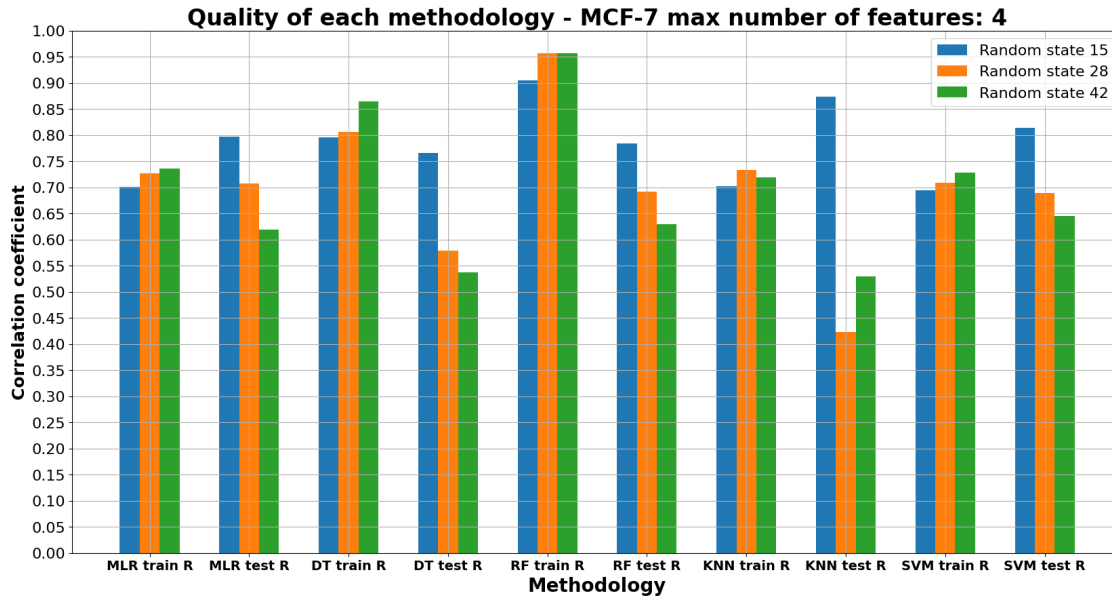

Random state - 15 ('MLR - number of features used: 4.0', 'DT - number of features used: 4.0', 'RF - number of features used: 4.0', 'KNN - number of features used: 4.0', 'SVM - number of features used: 4.0')

Random state - 28 ('MLR - number of features used: 4.0', 'DT - number of features used: 4.0', 'RF - number of features used: 4.0', 'KNN - number of features used: 4.0', 'SVM - number of features used: 4.0')

Random state - 42 ('MLR - number of features used: 4.0', 'DT - number of features used: 4.0', 'RF - number of features used: 4.0', 'KNN - number of features used: 4.0', 'SVM - number of features used: 4.0')

[ ]:

### 1.3 LoVo

```
[11]: for i in range(8, 1, -1): # 2 -> 1
      lovo = prepare_histogram_data('LoVo', i)
      prepare_plot(lovo, 'LoVo', i)
```

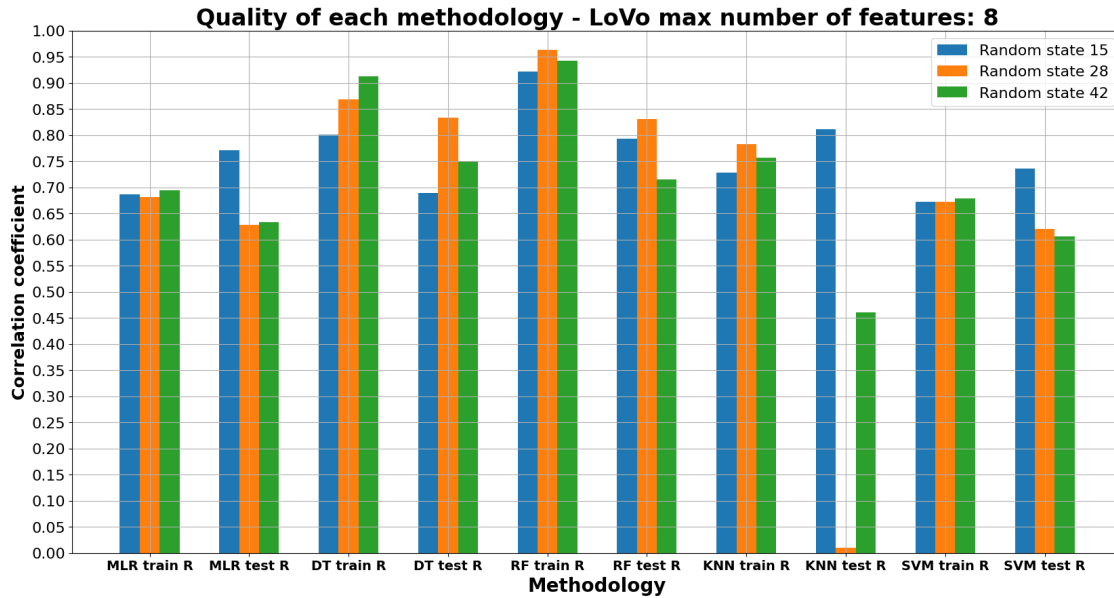

Random state - 15 ('MLR - number of features used: 6.0', 'DT - number of features used: 7.0', 'RF - number of features used: 5.0', 'KNN - number of features used: 5.0', 'SVM - number of features used: 6.0')

Random state - 28 ('MLR - number of features used: 2.0', 'DT - number of features used: 3.0', 'RF - number of features used: 7.0', 'KNN - number of features used: 7.0', 'SVM - number of features used: 2.0')

Random state - 42 ('MLR - number of features used: 3.0', 'DT - number of features used: 3.0', 'RF - number of features used: 5.0', 'KNN - number of features used: 5.0', 'SVM - number of features used: 2.0')

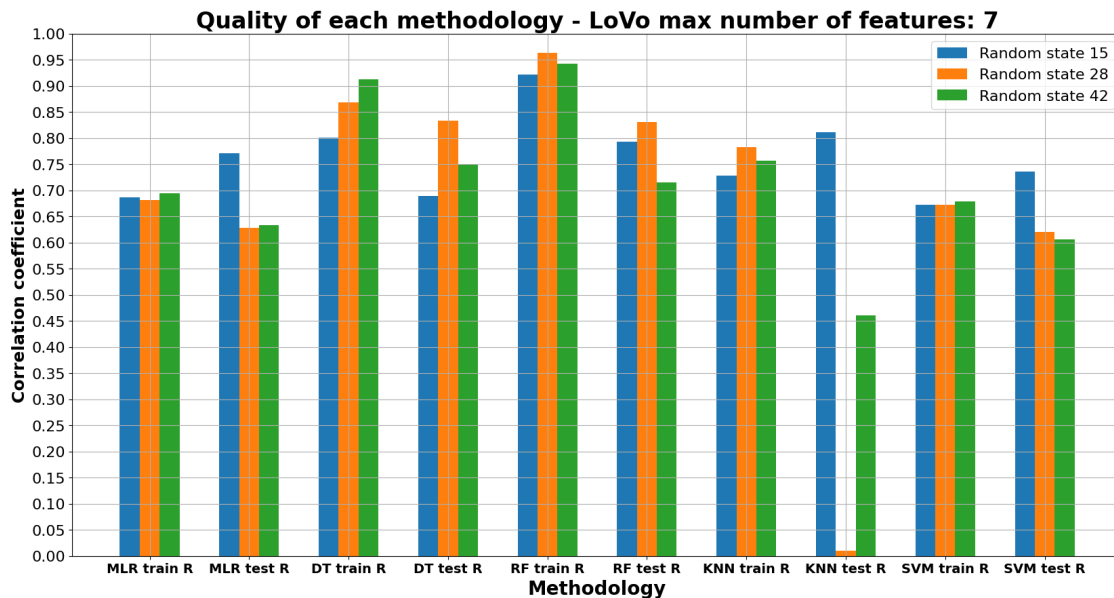

Random state - 15 ('MLR - number of features used: 6.0', 'DT - number of features used: 7.0', 'RF - number of features used: 5.0', 'KNN - number of features used: 5.0', 'SVM - number of features used: 6.0')

Random state - 28 ('MLR - number of features used: 2.0', 'DT - number of features used: 3.0', 'RF - number of features used: 7.0', 'KNN - number of features used: 7.0', 'SVM - number of features used: 2.0')

Random state - 42 ('MLR - number of features used: 3.0', 'DT - number of features used: 3.0', 'RF - number of features used: 5.0', 'KNN - number of features used: 5.0', 'SVM - number of features used: 2.0')

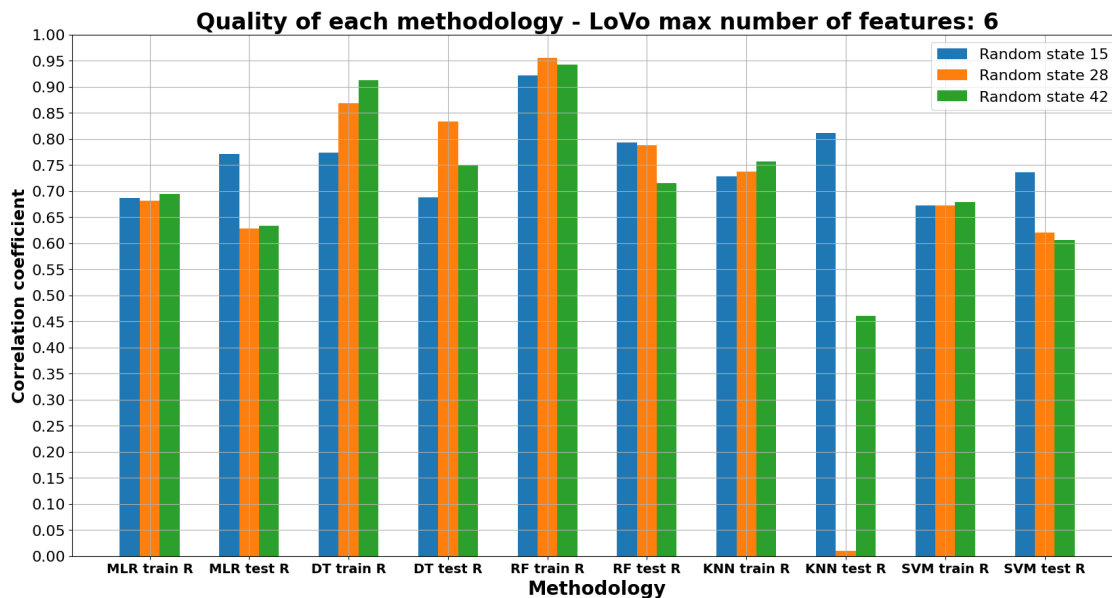

Random state - 15 ('MLR - number of features used: 6.0', 'DT - number of features used: 6.0', 'RF - number of features used: 5.0', 'KNN - number of features used: 5.0', 'SVM - number of features used: 6.0')

Random state - 28 ('MLR - number of features used: 2.0', 'DT - number of features used: 3.0', 'RF - number of features used: 6.0', 'KNN - number of features used: 2.0', 'SVM - number of features used: 2.0')

Random state - 42 ('MLR - number of features used: 3.0', 'DT - number of features used: 3.0', 'RF - number of features used: 5.0', 'KNN - number of features used: 5.0', 'SVM - number of features used: 2.0')

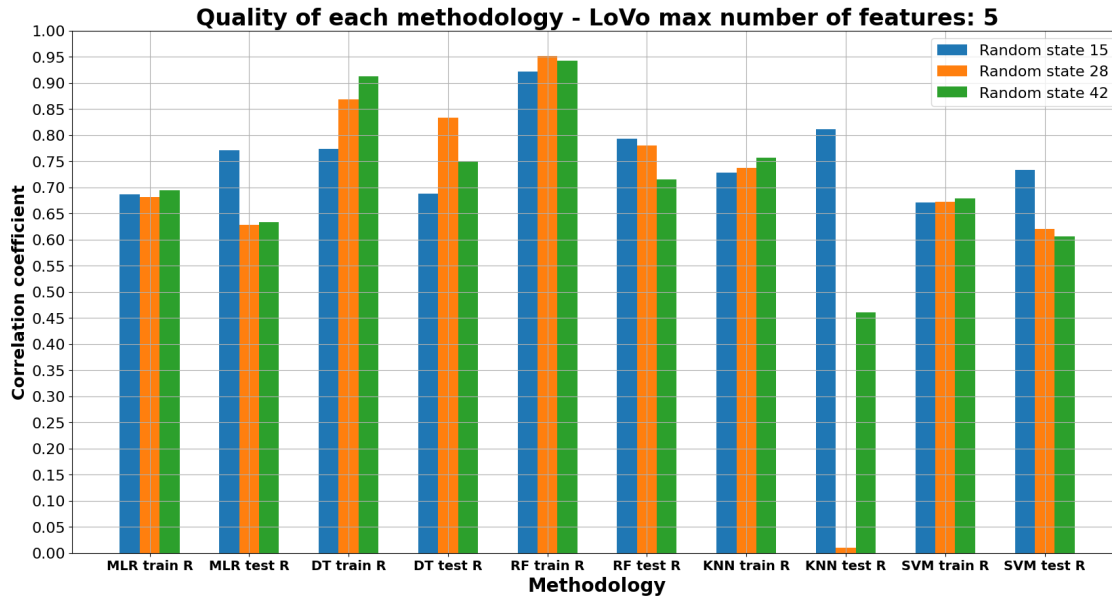

Random state - 15 ('MLR - number of features used: 5.0', 'DT - number of features used: 5.0', 'RF - number of features used: 5.0', 'KNN - number of features used: 5.0', 'SVM - number of features used: 5.0')

Random state - 28 ('MLR - number of features used: 2.0', 'DT - number of features used: 3.0', 'RF - number of features used: 5.0', 'KNN - number of features used: 2.0', 'SVM - number of features used: 2.0')

Random state - 42 ('MLR - number of features used: 3.0', 'DT - number of features used: 3.0', 'RF - number of features used: 5.0', 'KNN - number of features used: 5.0', 'SVM - number of features used: 2.0')

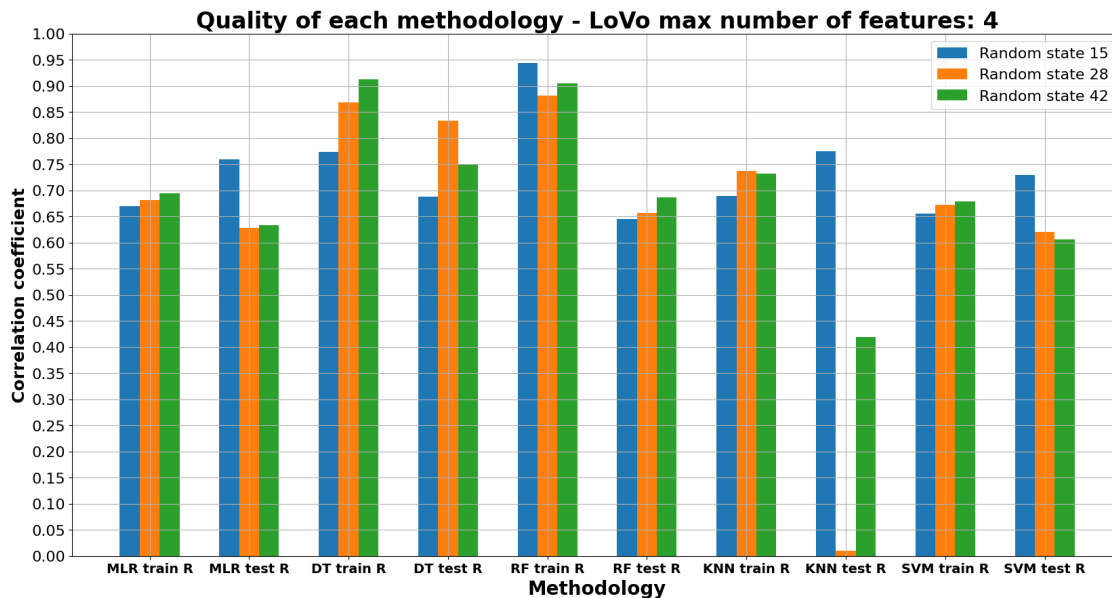

Random state - 15 ('MLR - number of features used: 3.0', 'DT - number of features used: 3.0', 'RF - number of features used: 3.0', 'KNN - number of features used: 2.0', 'SVM - number of features used: 2.0')

Random state - 28 ('MLR - number of features used: 2.0', 'DT - number of features used: 3.0', 'RF - number of features used: 2.0', 'KNN - number of features used: 2.0', 'SVM - number of features used: 2.0')

Random state - 42 ('MLR - number of features used: 3.0', 'DT - number of features used: 3.0', 'RF - number of features used: 2.0', 'KNN - number of features used: 2.0', 'SVM - number of features used: 2.0')

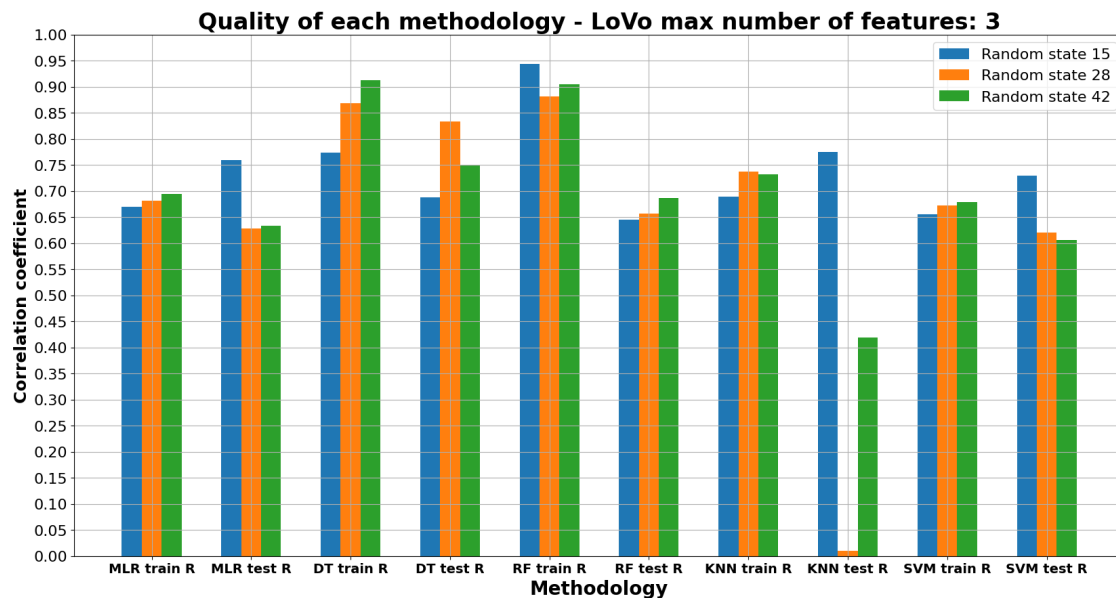

Random state - 15 ('MLR - number of features used: 3.0', 'DT - number of features used: 3.0', 'RF - number of features used: 3.0', 'KNN - number of features used: 2.0', 'SVM - number of features used: 2.0')

Random state - 28 ('MLR - number of features used: 2.0', 'DT - number of features used: 3.0', 'RF - number of features used: 2.0', 'KNN - number of features used: 2.0', 'SVM - number of features used: 2.0')

Random state - 42 ('MLR - number of features used: 3.0', 'DT - number of features used: 3.0', 'RF - number of features used: 2.0', 'KNN - number of features used: 2.0', 'SVM - number of features used: 2.0')

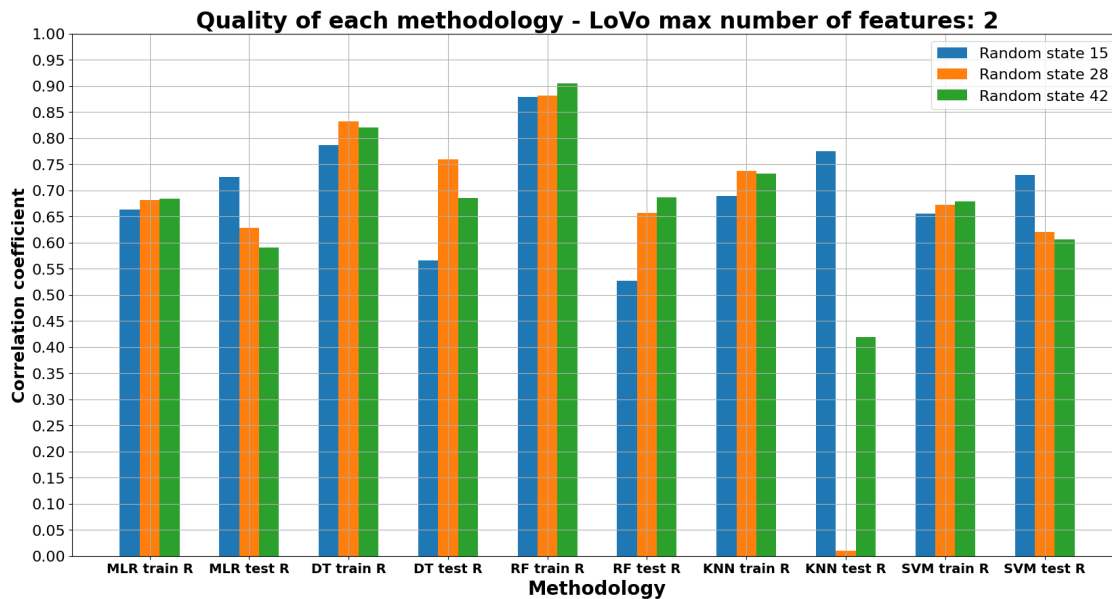

Random state - 15 ('MLR - number of features used: 2.0', 'DT - number of features used: 2.0', 'RF - number of features used: 2.0', 'KNN - number of features used: 2.0', 'SVM - number of features used: 2.0')

Random state - 28 ('MLR - number of features used: 2.0', 'DT - number of features used: 2.0', 'RF - number of features used: 2.0', 'KNN - number of features used: 2.0', 'SVM - number of features used: 2.0')

Random state - 42 ('MLR - number of features used: 2.0', 'DT - number of features used: 2.0', 'RF - number of features used: 2.0', 'KNN - number of features used: 2.0', 'SVM - number of features used: 2.0')

[ ]:

## 1.4 LoVo/DX

```
[12]: for i in range(8, 4, -1): # 5 -> 4
      lovo_dx = prepare_histogram_data('LoVo_DX', i)
      prepare_plot(lovo_dx, 'LoVo_DX', i)
```

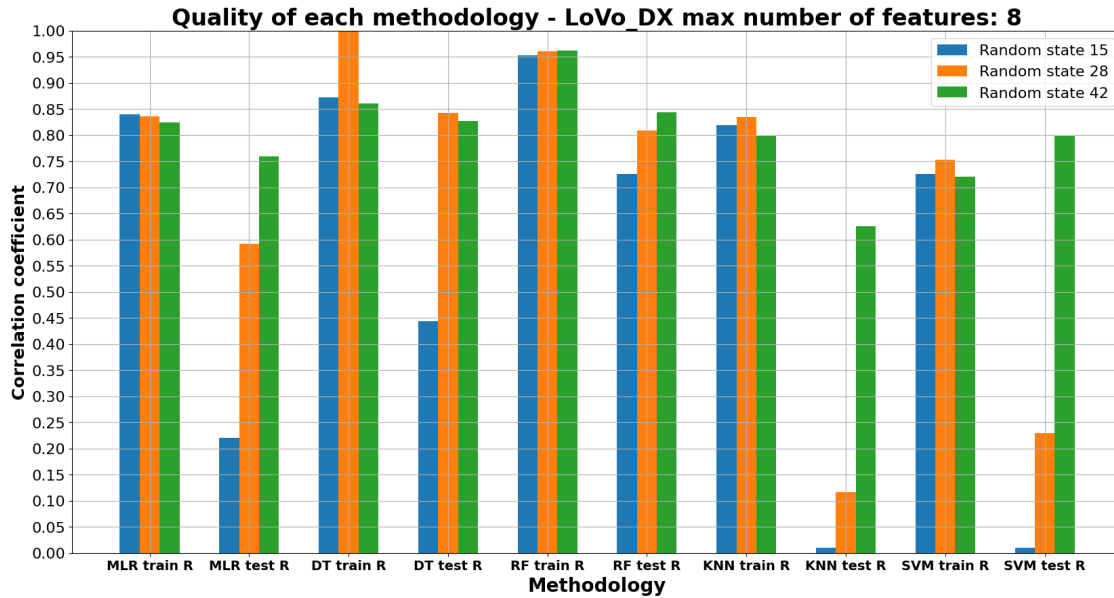

Random state - 15 ('MLR - number of features used: 8.0', 'DT - number of features used: 7.0', 'RF - number of features used: 8.0', 'KNN - number of features used: 7.0', 'SVM - number of features used: 5.0')

Random state - 28 ('MLR - number of features used: 7.0', 'DT - number of features used: 5.0', 'RF - number of features used: 8.0', 'KNN - number of features used: 8.0', 'SVM - number of features used: 8.0')

Random state - 42 ('MLR - number of features used: 8.0', 'DT - number of features used: 7.0', 'RF - number of features used: 7.0', 'KNN - number of features used: 7.0', 'SVM - number of features used: 8.0')

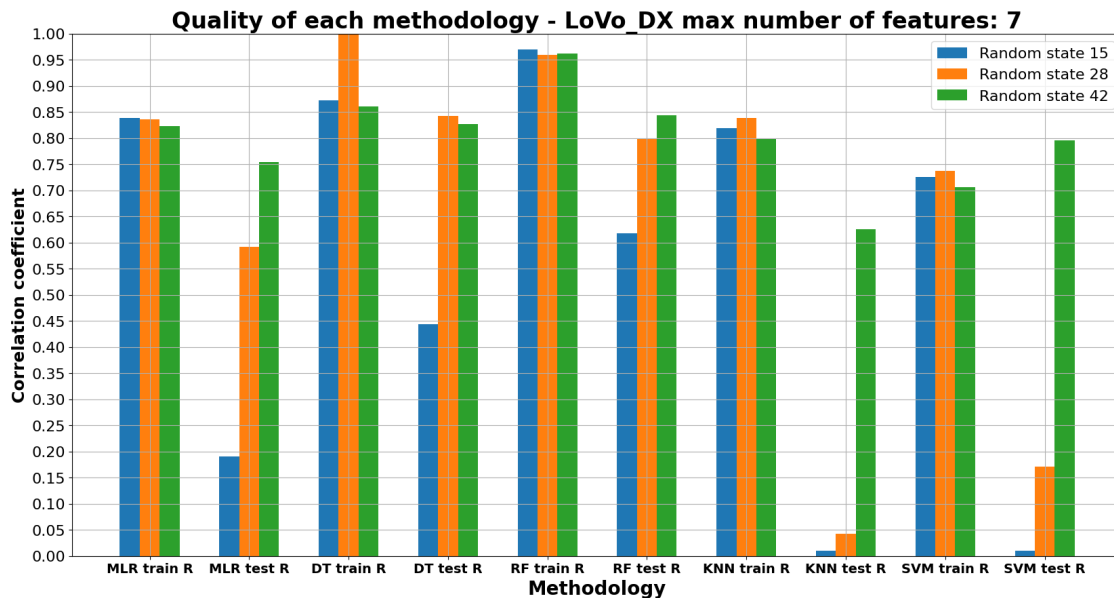



Random state - 15 ('MLR - number of features used: 7.0', 'DT - number of features used: 7.0', 'RF - number of features used: 7.0', 'KNN - number of features used: 7.0', 'SVM - number of features used: 5.0')

Random state - 28 ('MLR - number of features used: 7.0', 'DT - number of features used: 5.0', 'RF - number of features used: 7.0', 'KNN - number of features used: 7.0', 'SVM - number of features used: 5.0')

Random state - 42 ('MLR - number of features used: 7.0', 'DT - number of features used: 7.0', 'RF - number of features used: 7.0', 'KNN - number of features used: 7.0', 'SVM - number of features used: 7.0')

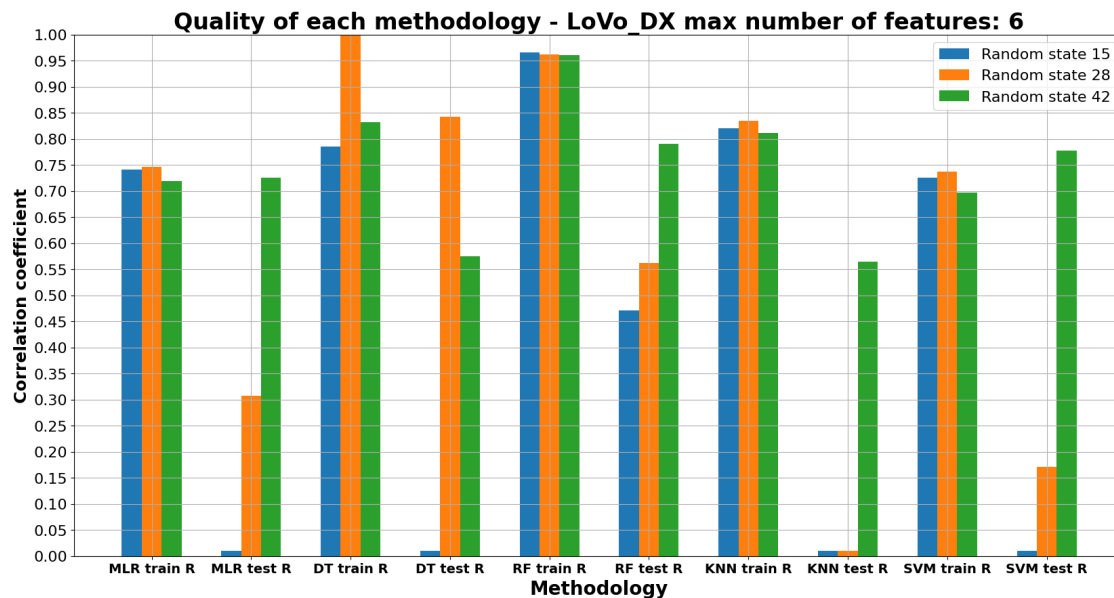

Random state - 15 ('MLR - number of features used: 5.0', 'DT - number of features used: 5.0', 'RF - number of features used: 5.0', 'KNN - number of features used: 5.0', 'SVM - number of features used: 5.0')

Random state - 28 ('MLR - number of features used: 5.0', 'DT - number of features used: 5.0', 'RF - number of features used: 5.0', 'KNN - number of features used: 5.0', 'SVM - number of features used: 5.0')

Random state - 42 ('MLR - number of features used: 5.0', 'DT - number of features used: 5.0', 'RF - number of features used: 5.0', 'KNN - number of features used: 5.0', 'SVM - number of features used: 5.0')

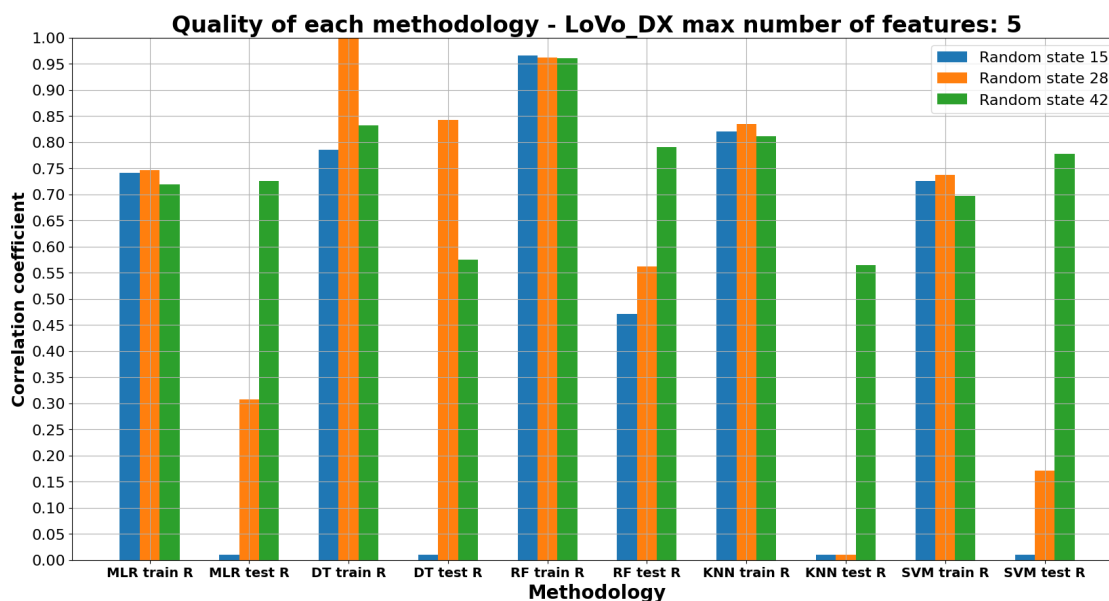

Random state - 15 ('MLR - number of features used: 5.0', 'DT - number of features used: 5.0', 'RF - number of features used: 5.0', 'KNN - number of features used: 5.0', 'SVM - number of features used: 5.0')

Random state - 28 ('MLR - number of features used: 5.0', 'DT - number of features used: 5.0', 'RF - number of features used: 5.0', 'KNN - number of features used: 5.0', 'SVM - number of features used: 5.0')

Random state - 42 ('MLR - number of features used: 5.0', 'DT - number of features used: 5.0', 'RF - number of features used: 5.0', 'KNN - number of features used: 5.0', 'SVM - number of features used: 5.0')

## 1.5 BALB/3T3

```
[13]: for i in range(8, 2, -1):
        balb = prepare_histogram_data('BALB_3T3', i)
        prepare_plot(balb, 'BALB_3T3', i)
```

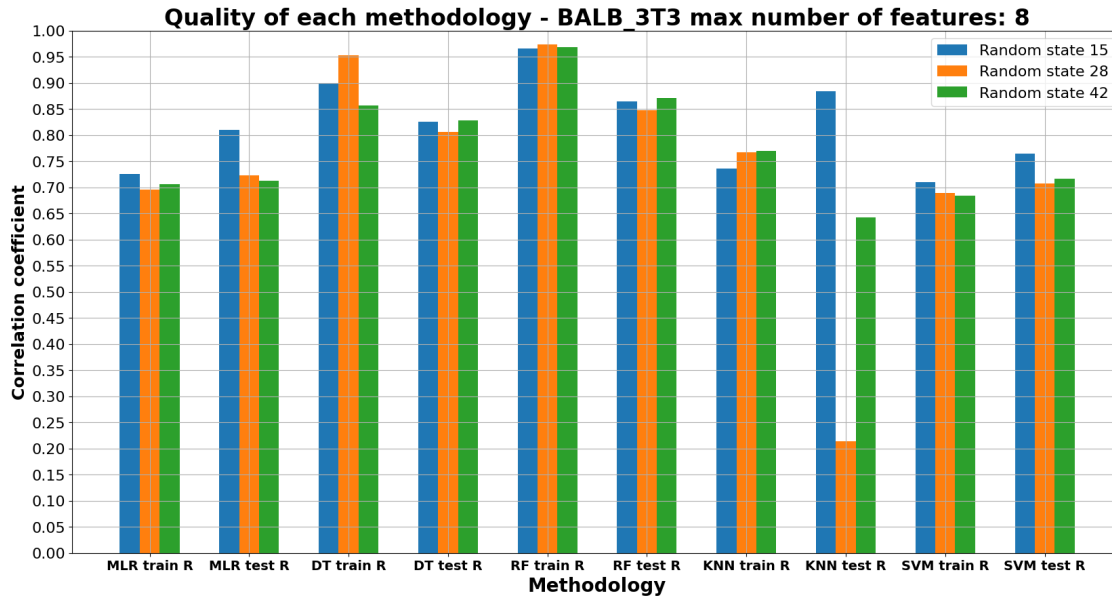

Random state - 15 ('MLR - number of features used: 7.0', 'DT - number of features used: 6.0', 'RF - number of features used: 6.0', 'KNN - number of features used: 6.0', 'SVM - number of features used: 7.0')

Random state - 28 ('MLR - number of features used: 2.0', 'DT - number of features used: 6.0', 'RF - number of features used: 7.0', 'KNN - number of features used: 3.0', 'SVM - number of features used: 2.0')

Random state - 42 ('MLR - number of features used: 3.0', 'DT - number of features used: 6.0', 'RF - number of features used: 7.0', 'KNN - number of features used: 7.0', 'SVM - number of features used: 3.0')

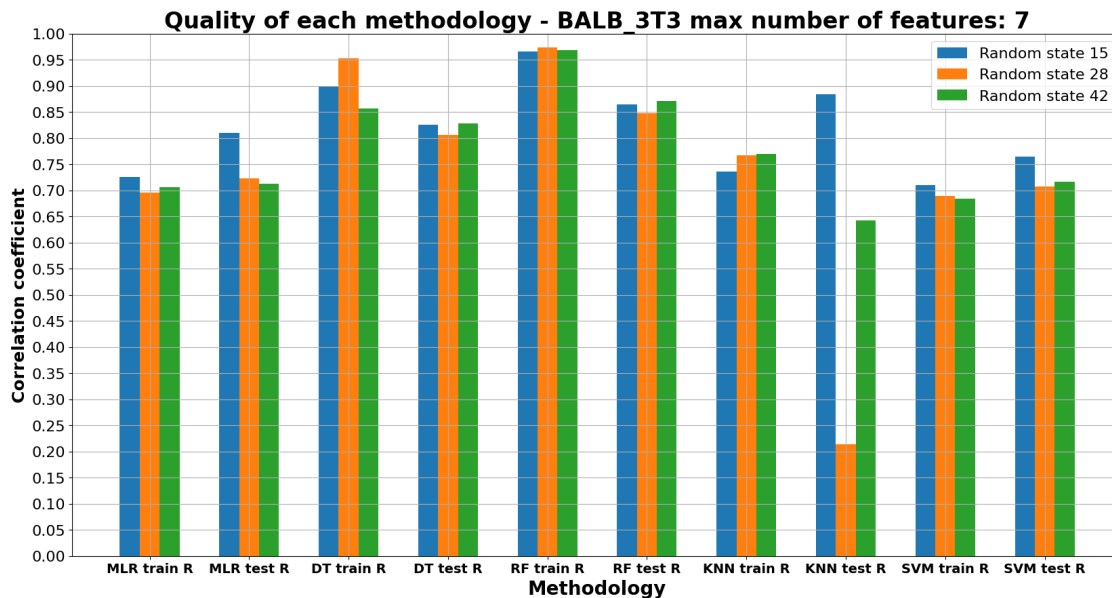

Random state - 15 ('MLR - number of features used: 7.0', 'DT - number of features used: 6.0', 'RF - number of features used: 6.0', 'KNN - number of features used: 6.0', 'SVM - number of features used: 7.0')

Random state - 28 ('MLR - number of features used: 2.0', 'DT - number of features used: 6.0', 'RF - number of features used: 7.0', 'KNN - number of features used: 3.0', 'SVM - number of features used: 2.0')

Random state - 42 ('MLR - number of features used: 3.0', 'DT - number of features used: 6.0', 'RF - number of features used: 7.0', 'KNN - number of features used: 7.0', 'SVM - number of features used: 3.0')

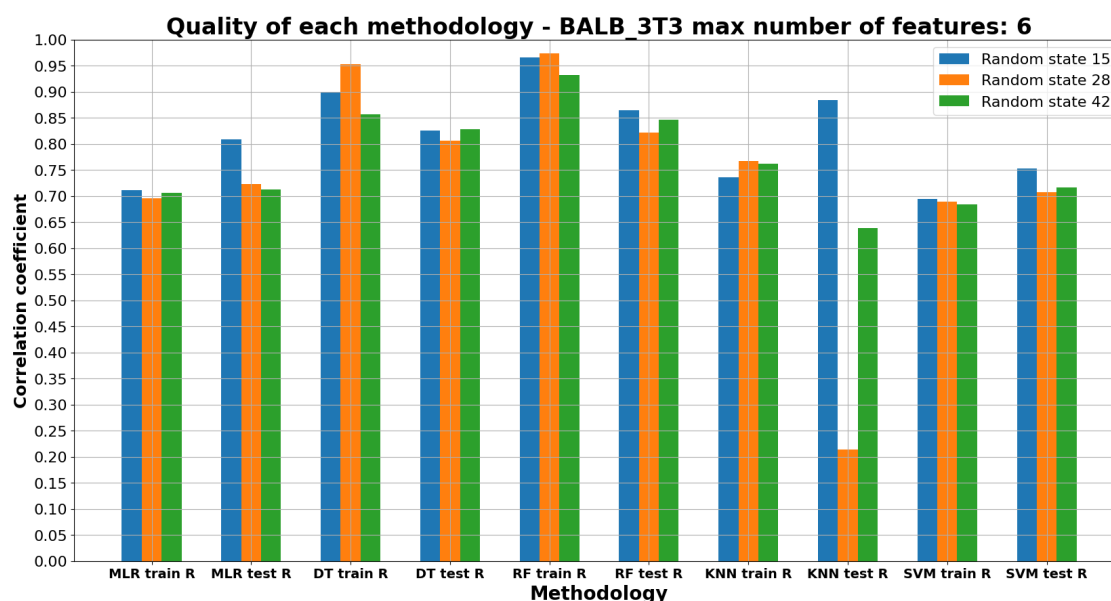

Random state - 15 ('MLR - number of features used: 6.0', 'DT - number of features used: 6.0', 'RF - number of features used: 6.0', 'KNN - number of features used: 6.0', 'SVM - number of features used: 5.0')

Random state - 28 ('MLR - number of features used: 2.0', 'DT - number of features used: 6.0', 'RF - number of features used: 6.0', 'KNN - number of features used: 3.0', 'SVM - number of features used: 2.0')

Random state - 42 ('MLR - number of features used: 3.0', 'DT - number of features used: 6.0', 'RF - number of features used: 6.0', 'KNN - number of features used: 3.0', 'SVM - number of features used: 3.0')

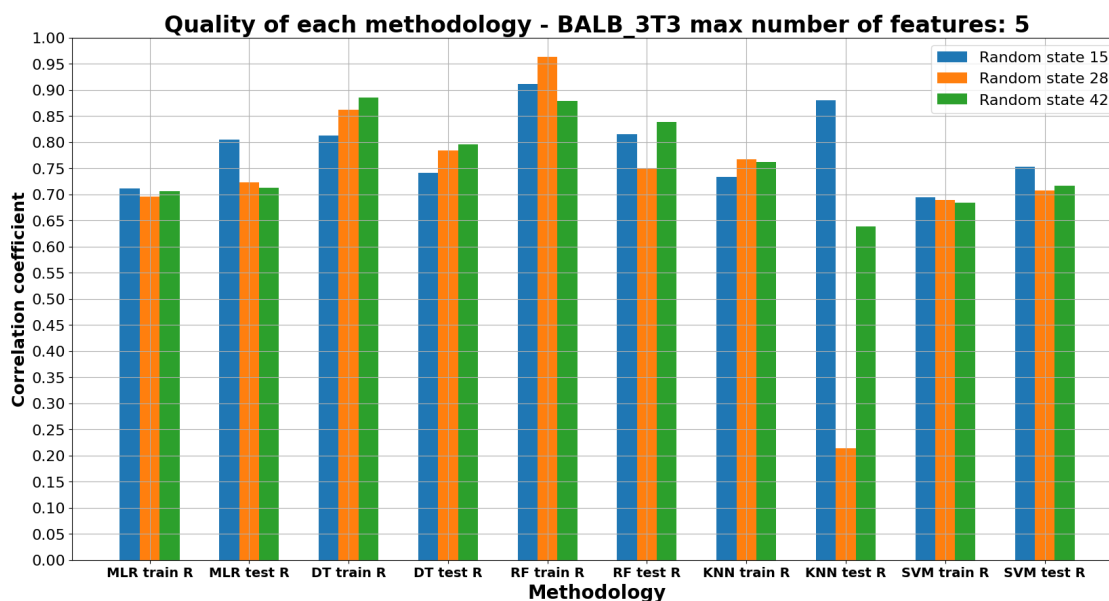

Random state - 15 ('MLR - number of features used: 5.0', 'DT - number of features used: 5.0', 'RF - number of features used: 5.0', 'KNN - number of features used: 5.0', 'SVM - number of features used: 5.0')

Random state - 28 ('MLR - number of features used: 2.0', 'DT - number of features used: 3.0', 'RF - number of features used: 5.0', 'KNN - number of features used: 3.0', 'SVM - number of features used: 2.0')

Random state - 42 ('MLR - number of features used: 3.0', 'DT - number of features used: 2.0', 'RF - number of features used: 2.0', 'KNN - number of features used: 3.0', 'SVM - number of features used: 3.0')

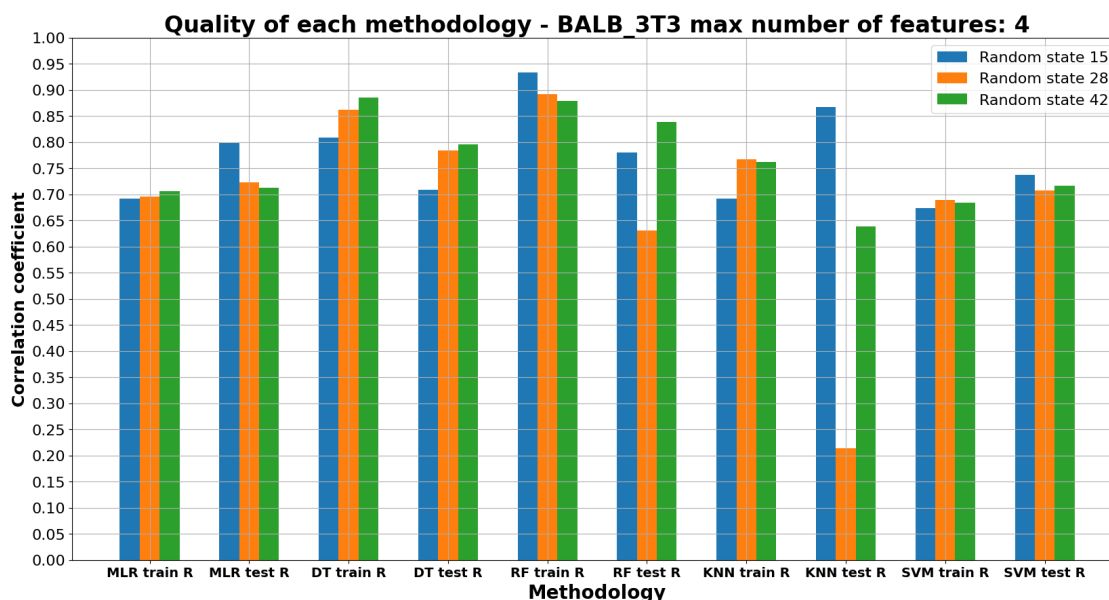

Random state - 15 ('MLR - number of features used: 3.0', 'DT - number of features used: 3.0', 'RF - number of features used: 3.0', 'KNN - number of features used: 2.0', 'SVM - number of features used: 3.0')

Random state - 28 ('MLR - number of features used: 2.0', 'DT - number of features used: 3.0', 'RF - number of features used: 2.0', 'KNN - number of features used: 3.0', 'SVM - number of features used: 2.0')

Random state - 42 ('MLR - number of features used: 3.0', 'DT - number of features used: 2.0', 'RF - number of features used: 2.0', 'KNN - number of features used: 3.0', 'SVM - number of features used: 3.0')

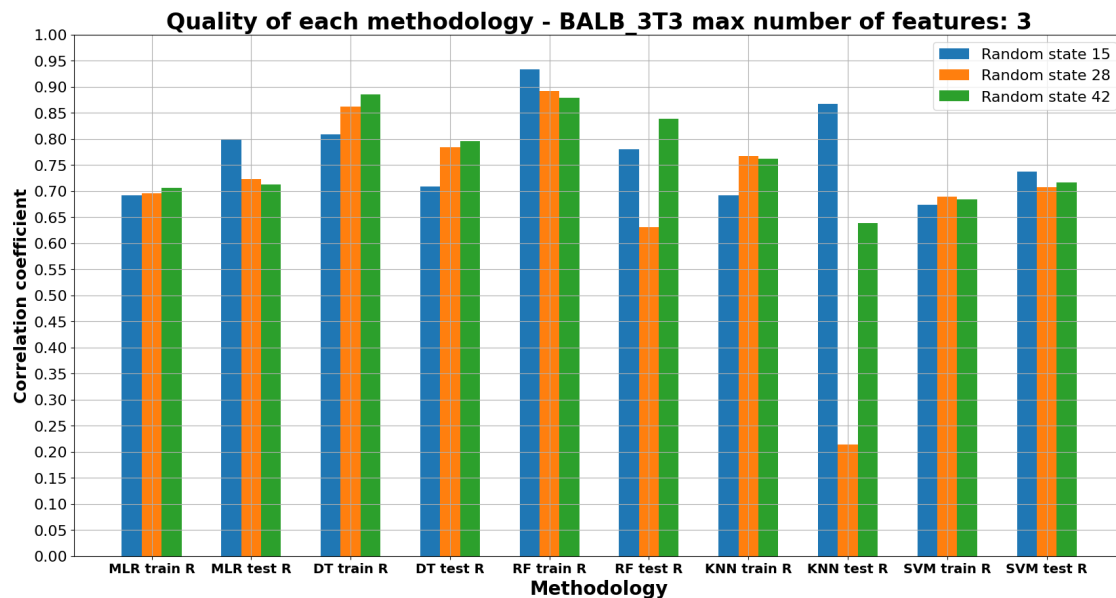

Random state - 15 ('MLR - number of features used: 3.0', 'DT - number of features used: 3.0', 'RF - number of features used: 3.0', 'KNN - number of features used: 2.0', 'SVM - number of features used: 3.0')

Random state - 28 ('MLR - number of features used: 2.0', 'DT - number of features used: 3.0', 'RF - number of features used: 2.0', 'KNN - number of features used: 3.0', 'SVM - number of features used: 2.0')

Random state - 42 ('MLR - number of features used: 3.0', 'DT - number of features used: 2.0', 'RF - number of features used: 2.0', 'KNN - number of features used: 3.0', 'SVM - number of features used: 3.0')

[ ]:

[ ]:

## 1.6 Best models selection

```
[14]: def prepare_best_plot(target_name, max_number_of_features):

    excel_files = []

    for name in glob.glob('../Data/Quality_'+str(target_name)+'*'):
        excel_files.append(name)

    random_state_15 = []
    random_state_28 = []
    random_state_42 = []
    features_15 = []
    features_28 = []
    features_42 = []
    random_states = [15, 28, 42]

    for random_state in range(len(random_states)):
        tmp = []
        to_plot = []
        values = []
        number_of_features = []
        for sheet in sheet_names:
            tmp.append(pd.read_excel(excel_files[random_state],
↪sheet_name=sheet))
            for data in tmp:
                temp = data[data['Number of features'] <= max_number_of_features]
                to_plot.append(temp[temp['Test data R^2 score'] == max(temp['Test_
↪data R^2 score'])])
            for value in to_plot:
                values.append(value['Training data R^2 score'].tail(1))
                values.append(value['Test data R^2 score'].tail(1))
                number_of_features.append(value['Number of features'].tail(1))
        for element in values:
            if random_state == 0:
                random_state_15.append(float(element))
            elif random_state == 1:
                random_state_28.append(float(element))
            elif random_state == 2:
                random_state_42.append(float(element))
            else:
                print("Error with conditions...")

    for features in number_of_features:
        if random_state == 0:
            features_15.append(float(features))
        elif random_state == 1:
```

```

        features_28.append(float(features))
    elif random_state == 2:
        features_42.append(float(features))
    else:
        print("Error with conditions...")

    return random_state_15, random_state_28, random_state_42, features_15,
    features_28, features_42

```

```

[15]: def prepare_plot(data, name, max_number_of_features):
    fig = plt.figure(figsize=(20,10))
    X = x_ticks
    y_15 = handle_negative_corr(data[0])
    y_28 = handle_negative_corr(data[1])
    y_42 = handle_negative_corr(data[2])

    X_axis = np.arange(len(X))
    y_ax = [x/100 for x in range(0, 105, 5)]
    plt.yticks(y_ax)
    plt.bar(X_axis - 0.2, y_15, 0.2, label = 'Random state 15')
    plt.bar(X_axis + 0.0, y_28, 0.2, label = 'Random state 28')
    plt.bar(X_axis + 0.2, y_42, 0.2, label = 'Random state 42')
    #plt.plot(X_axis, y_15, color='r', label='Random state 15')
    #plt.plot(X_axis, y_28, color='g', label='Random state 28')
    #plt.plot(X_axis, y_42, color='b', label='Random state 42')

    plt.xticks(X_axis, X)
    plt.xlabel("Methodology", fontsize=20, weight='bold')
    plt.ylabel("Correlation coefficient", fontsize=18, weight='bold')
    plt.ylim([0.0, 1.0])
    plt.title("Quality of each methodology - "+str(name)+' '+str('max number of
    features: '+str(max_number_of_features)), fontsize=24, weight='bold')
    plt.grid(visible=True)
    plt.legend()
    plt.show()
    for i, state in enumerate(random_states):
        print('Random state - '+str(state)+'
        '+str(update_description(sheet_names, data[i+3])))

```

```

[16]: def update_description(x_axis_labels, number_of_features):

    DT = str(x_axis_labels[0])+' - number of features used:
    '+str(number_of_features[0])
    RF = str(x_axis_labels[1])+' - number of features used:
    '+str(number_of_features[1])

```



```
return DT, RF
```

```
[ ]:
```

### 1.6.1 A549

```
[17]: sheet_names = ['DT', 'RF']
```

```
[18]: x_ticks = ['DT train R', 'DT test R', 'RF train R', 'RF test R']
```

```
[19]: for i in range(8, 3, -1):
    a549 = prepare_best_plot('A549', i)
    prepare_plot(a549, 'A549', i)
    print(handle_negative_corr(a549[0]))
    print(handle_negative_corr(a549[1]))
    print(handle_negative_corr(a549[2]))
```

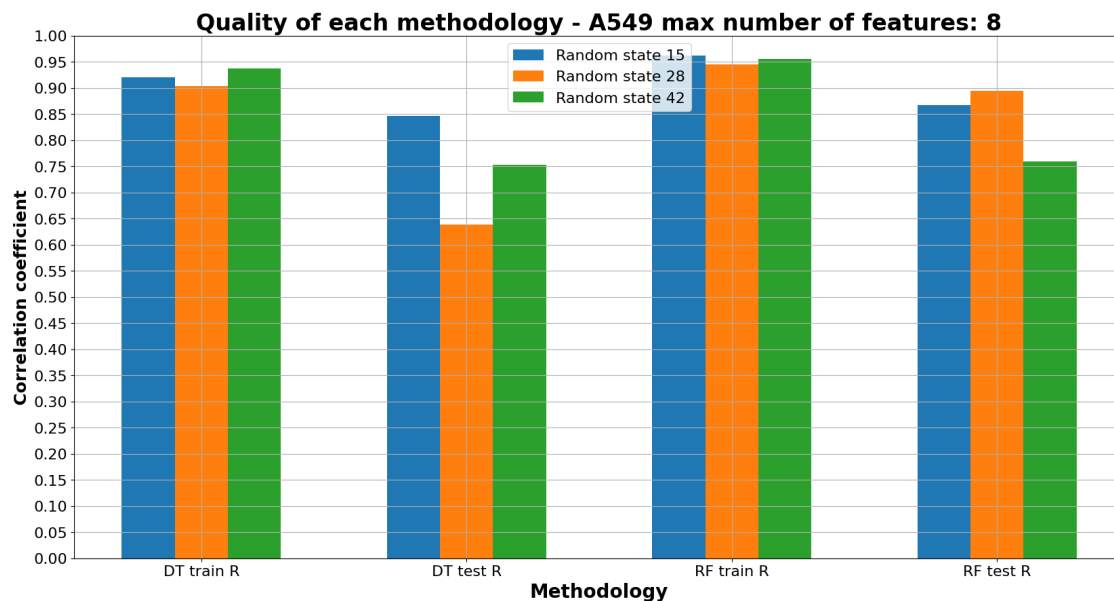

Random state - 15 ('DT - number of features used: 5.0', 'RF - number of features used: 8.0')

Random state - 28 ('DT - number of features used: 7.0', 'RF - number of features used: 8.0')

Random state - 42 ('DT - number of features used: 8.0', 'RF - number of features used: 7.0')

[0.9201268576746804, 0.8457608041331407, 0.9617557913430392, 0.8674998324838339]

[0.9039251218762473, 0.6385038801226338, 0.9449953932266721, 0.8948585348179655]

[0.9379105079400218, 0.7530696887427908, 0.9560924167894731, 0.7596144482170636]

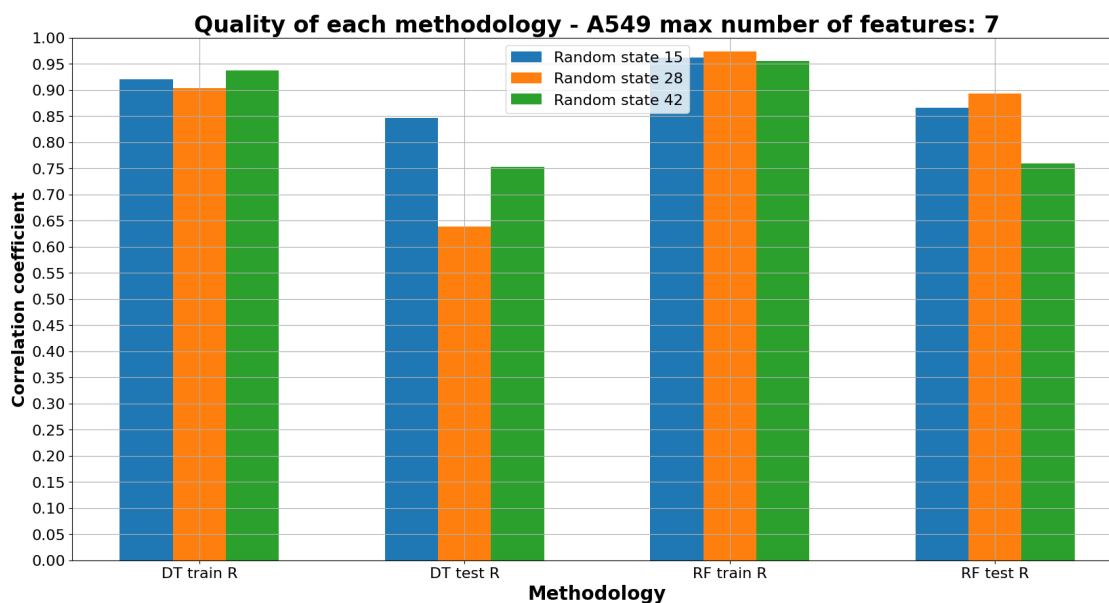

Random state - 15 ('DT - number of features used: 5.0', 'RF - number of features used: 7.0')

Random state - 28 ('DT - number of features used: 7.0', 'RF - number of features used: 7.0')

Random state - 42 ('DT - number of features used: 7.0', 'RF - number of features used: 7.0')

[0.9201268576746804, 0.8457608041331407, 0.9617502720280803, 0.865633475359066]  
 [0.9039251218762473, 0.6385038801226338, 0.9733717517208741, 0.8936683566006186]  
 [0.9379105079400218, 0.7530696887427905, 0.9560924167894731, 0.7596144482170636]

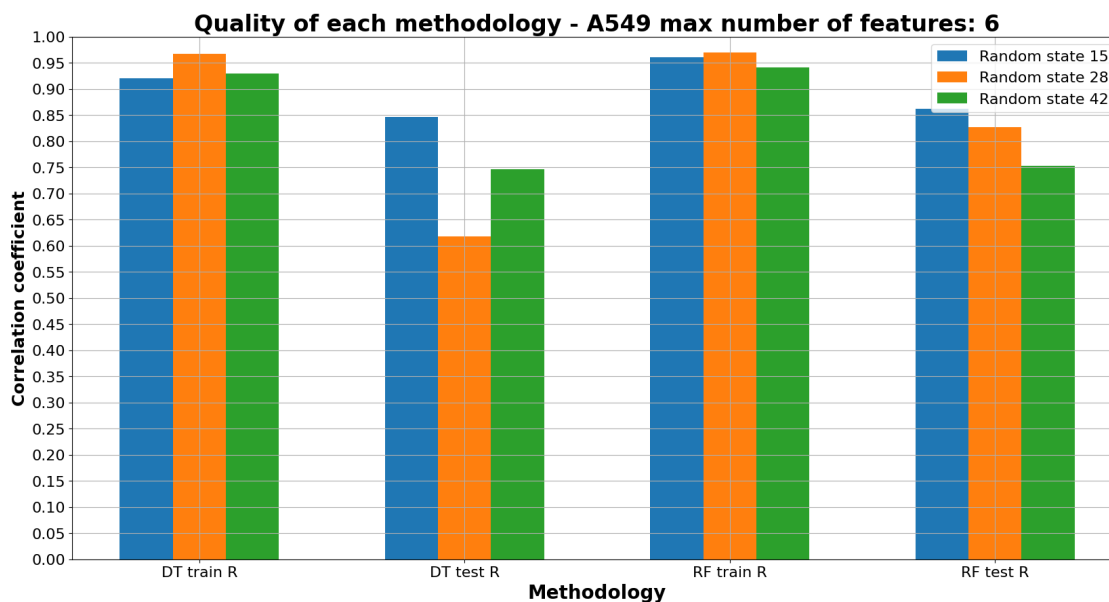

Random state - 15 ('DT - number of features used: 5.0', 'RF - number of features used: 5.0')

Random state - 28 ('DT - number of features used: 4.0', 'RF - number of features used: 5.0')

Random state - 42 ('DT - number of features used: 5.0', 'RF - number of features used: 5.0')

[0.9201268576746804, 0.8457608041331407, 0.960591935079034, 0.8620618597285548]  
[0.9669220010492233, 0.6172800607391895, 0.9701820261061275, 0.8267270635721486]  
[0.9298029234842533, 0.746434872641246, 0.9417342321043257, 0.7526447589514621]

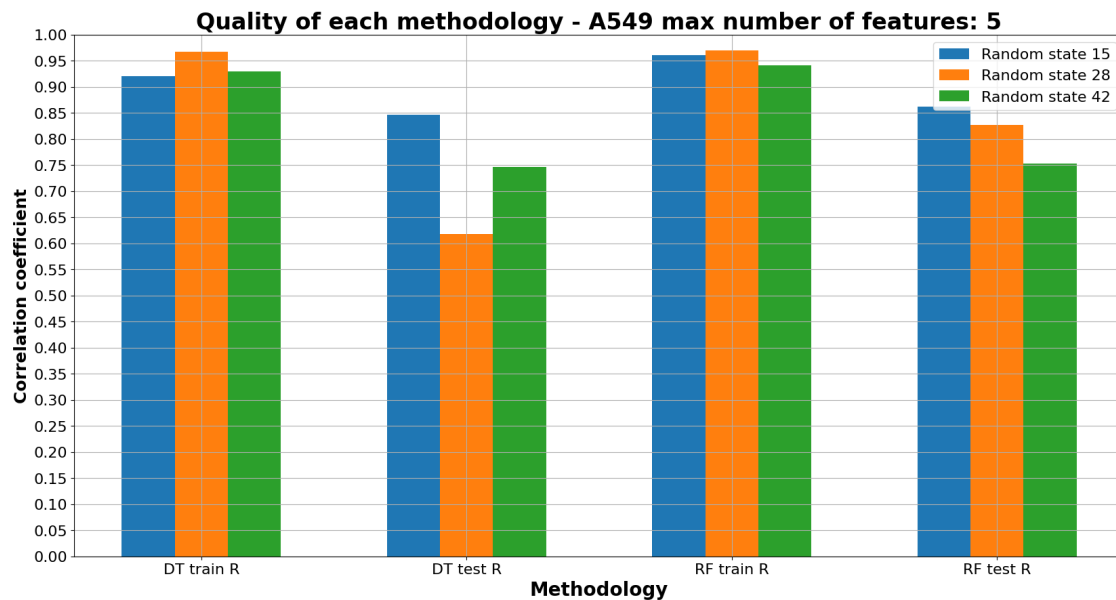

Random state - 15 ('DT - number of features used: 5.0', 'RF - number of features used: 5.0')

Random state - 28 ('DT - number of features used: 4.0', 'RF - number of features used: 5.0')

Random state - 42 ('DT - number of features used: 5.0', 'RF - number of features used: 5.0')

[0.9201268576746804, 0.8457608041331407, 0.960591935079034, 0.8620618597285548]  
[0.9669220010492233, 0.6172800607391895, 0.9701820261061275, 0.8267270635721486]  
[0.9298029234842533, 0.746434872641246, 0.9417342321043257, 0.7526447589514621]

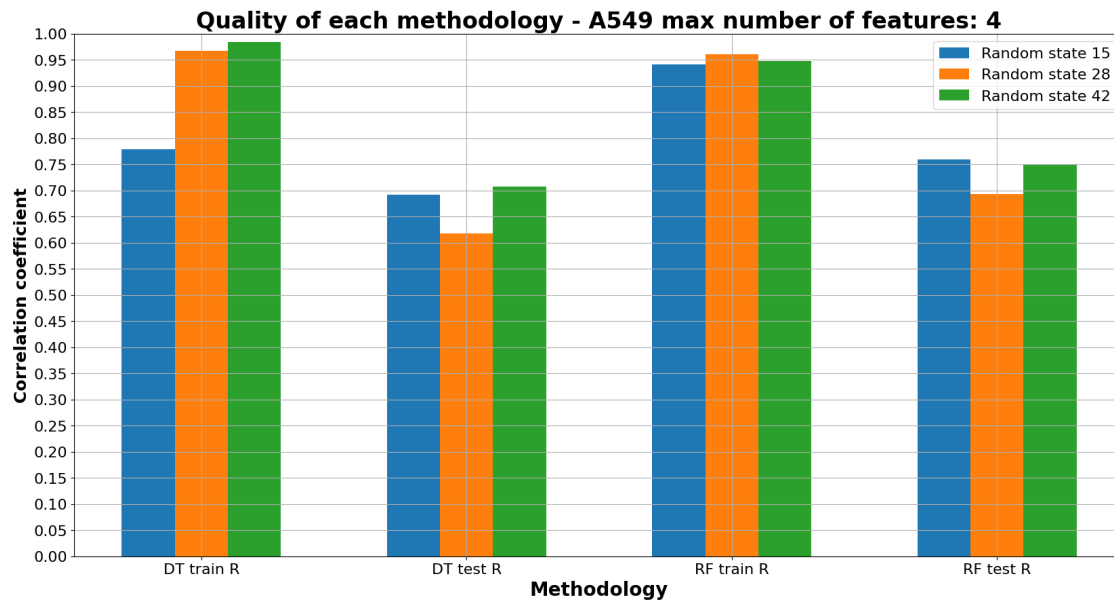

Random state - 15 ('DT - number of features used: 3.0', 'RF - number of features used: 4.0')

Random state - 28 ('DT - number of features used: 4.0', 'RF - number of features used: 4.0')

Random state - 42 ('DT - number of features used: 3.0', 'RF - number of features used: 3.0')

[0.7787561234847591, 0.6915475851498438, 0.94133348297971, 0.7594733568417315]

[0.9669220010492233, 0.6172800607391895, 0.9601878273802564, 0.6926815941771752]

[0.9846195227501177, 0.70753906802074, 0.9477169502251152, 0.7487968593395388]

[ ]:

```
[20]: for i in range(8, 2, -1):
      x = prepare_best_plot('BALB_3T3', i)
      prepare_plot(x, 'BALB_3T3', i)
      print(handle_negative_corr(x[0]))
      print(handle_negative_corr(x[1]))
      print(handle_negative_corr(x[2]))
```

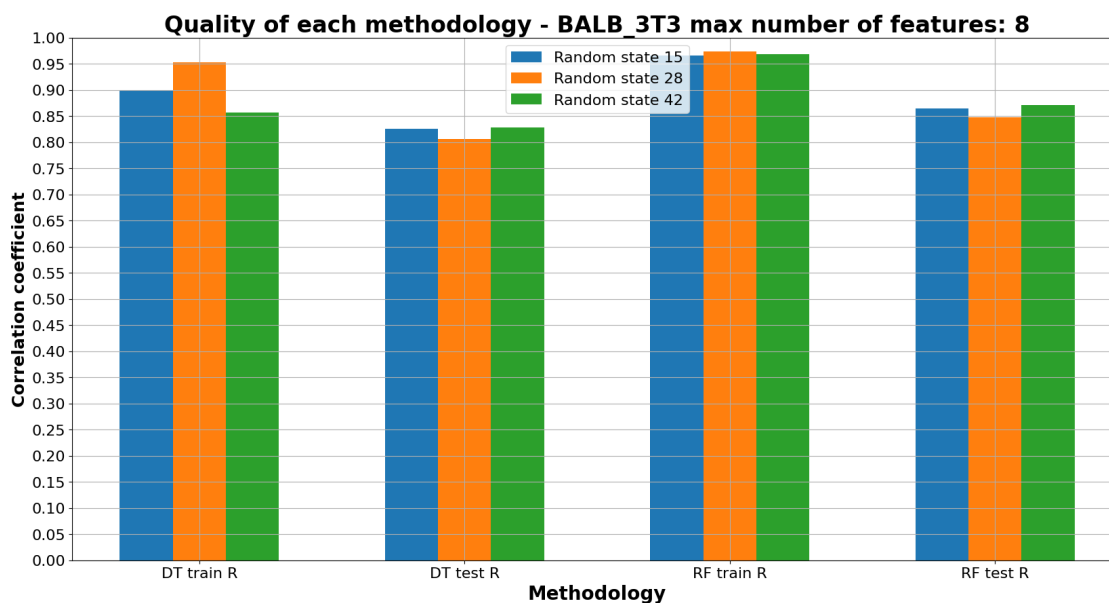

Random state - 15 ('DT - number of features used: 6.0', 'RF - number of features used: 6.0')

Random state - 28 ('DT - number of features used: 6.0', 'RF - number of features used: 7.0')

Random state - 42 ('DT - number of features used: 6.0', 'RF - number of features used: 7.0')

[0.8991491467263336, 0.8261911693918914, 0.9656538230216772, 0.8642992780332693]

[0.9528404289708712, 0.8063470063121128, 0.9733753371944485, 0.8472660678286129]

[0.8574233855704518, 0.8283658235151035, 0.9679324070733115, 0.8709265604132982]

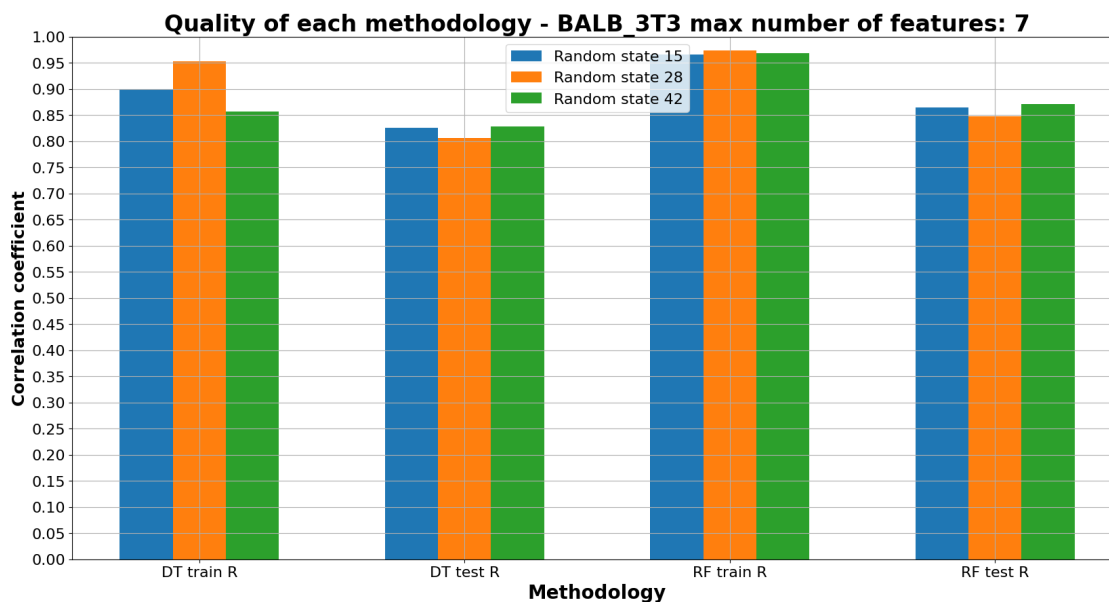

Random state - 15 ('DT - number of features used: 6.0', 'RF - number of features used: 6.0')

Random state - 28 ('DT - number of features used: 6.0', 'RF - number of features used: 7.0')

Random state - 42 ('DT - number of features used: 6.0', 'RF - number of features used: 7.0')

[0.8991491467263336, 0.8261911693918914, 0.9656538230216772, 0.8642992780332693]

[0.9528404289708712, 0.8063470063121128, 0.9733753371944485, 0.8472660678286129]

[0.8574233855704518, 0.8283658235151035, 0.9679324070733115, 0.8709265604132982]

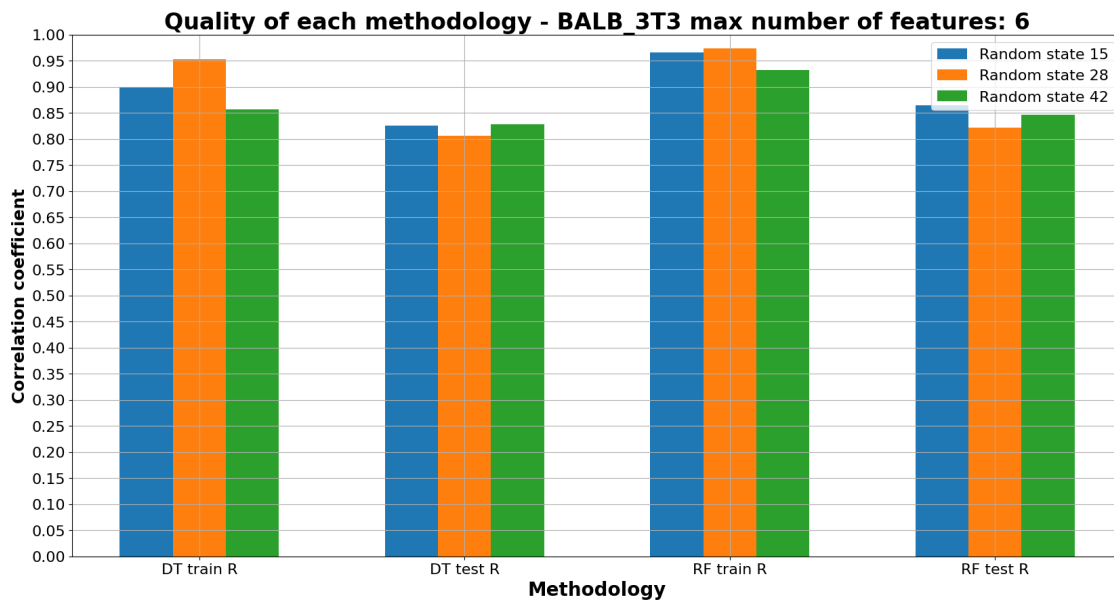

Random state - 15 ('DT - number of features used: 6.0', 'RF - number of features used: 6.0')

Random state - 28 ('DT - number of features used: 6.0', 'RF - number of features used: 6.0')

Random state - 42 ('DT - number of features used: 6.0', 'RF - number of features used: 6.0')

[0.8991491467263336, 0.8261911693918914, 0.9656538230216772, 0.8642992780332693]

[0.9528404289708712, 0.8063470063121128, 0.9732431671159815, 0.8213095110427073]

[0.8574233855704518, 0.8283658235151035, 0.9323265067533627, 0.8462778707935902]

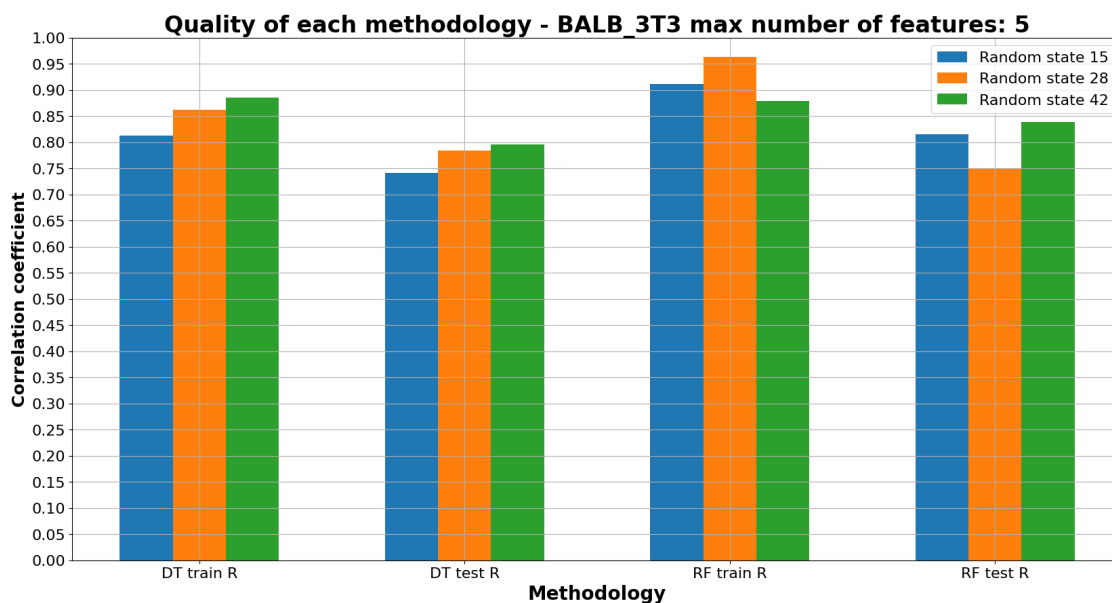

Random state - 15 ('DT - number of features used: 5.0', 'RF - number of features used: 5.0')

Random state - 28 ('DT - number of features used: 3.0', 'RF - number of features used: 5.0')

Random state - 42 ('DT - number of features used: 2.0', 'RF - number of features used: 2.0')

[0.8124040437986895, 0.7410808070808154, 0.9118596336958118, 0.8149483739246309]

[0.8618249162158247, 0.7846752040880232, 0.9628242677281924, 0.7501347353760348]

[0.885912746009139, 0.7955365930788652, 0.8792917450164119, 0.8379661052032461]

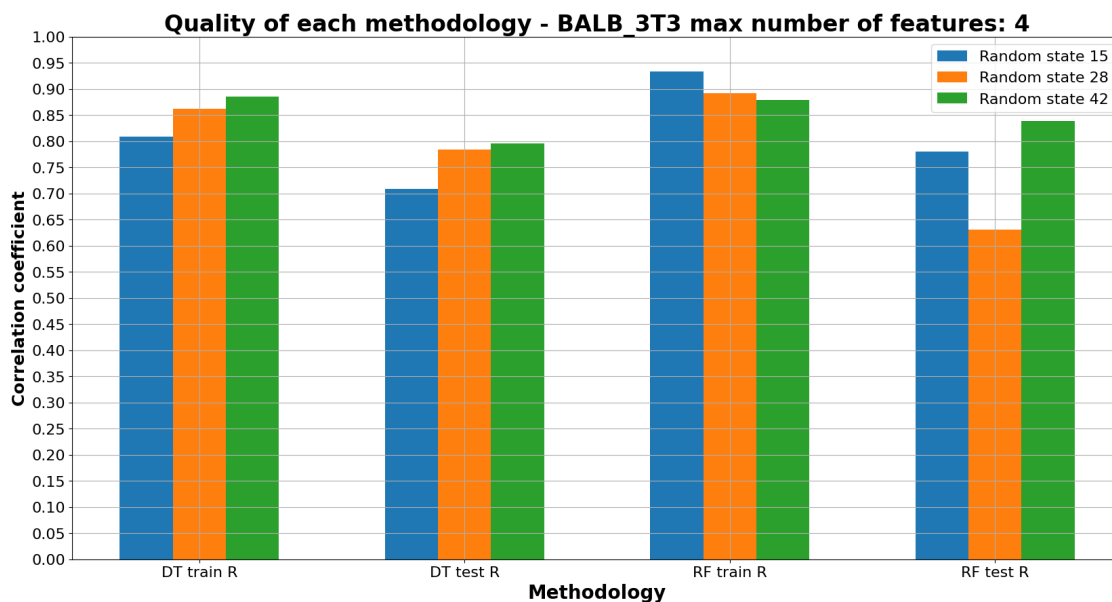

Random state - 15 ('DT - number of features used: 3.0', 'RF - number of features used: 3.0')

Random state - 28 ('DT - number of features used: 3.0', 'RF - number of features used: 2.0')

Random state - 42 ('DT - number of features used: 2.0', 'RF - number of features used: 2.0')

[0.8089681087052601, 0.7083667815152337, 0.9331579969232232, 0.780272449227771]

[0.8618249162158247, 0.7846752040880232, 0.8911999290100625, 0.6303440412443166]

[0.885912746009139, 0.7955365930788652, 0.8792917450164119, 0.8379661052032461]

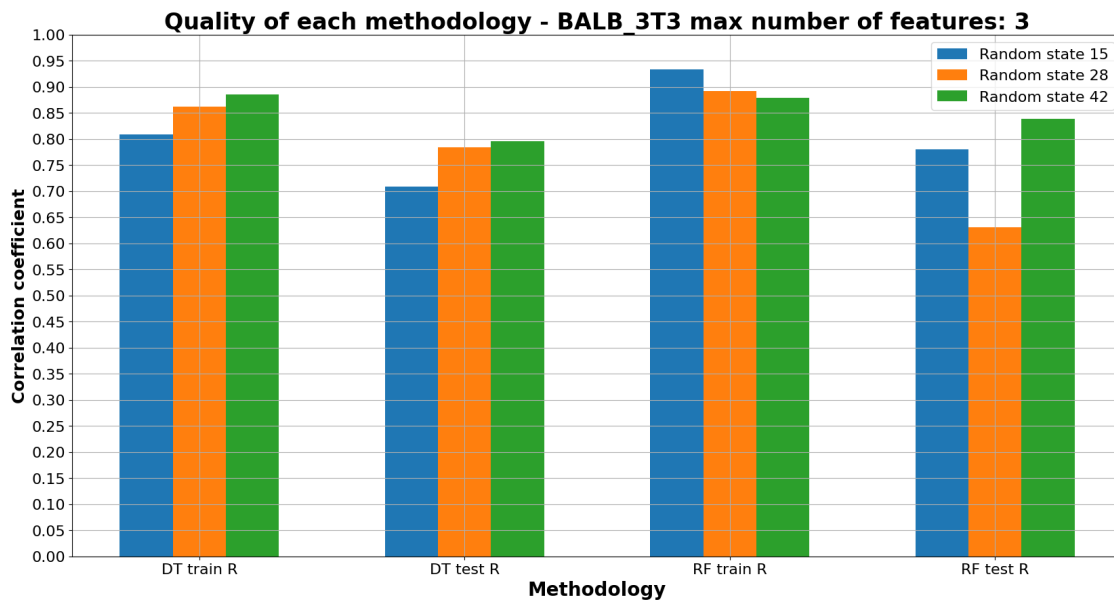

Random state - 15 ('DT - number of features used: 3.0', 'RF - number of features used: 3.0')

Random state - 28 ('DT - number of features used: 3.0', 'RF - number of features used: 2.0')

Random state - 42 ('DT - number of features used: 2.0', 'RF - number of features used: 2.0')

[0.8089681087052601, 0.7083667815152337, 0.9331579969232232, 0.780272449227771]

[0.8618249162158247, 0.7846752040880232, 0.8911999290100625, 0.6303440412443166]

[0.885912746009139, 0.7955365930788652, 0.8792917450164119, 0.8379661052032461]

[ ]:

```
[21]: for i in range(8, 2, -1):
        x = prepare_best_plot('LoVo', i)
        prepare_plot(x, 'LoVo', i)
        print(handle_negative_corr(x[0]))
```



```
print(handle_negative_corr(x[1]))
print(handle_negative_corr(x[2]))
```

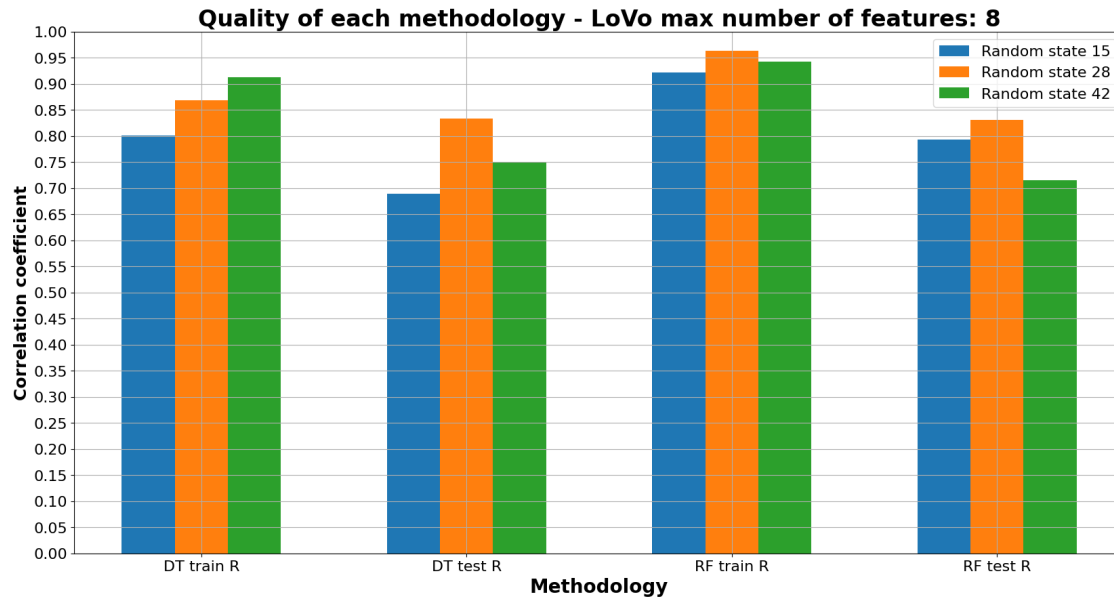

Random state - 15 ('DT - number of features used: 7.0', 'RF - number of features used: 5.0')

Random state - 28 ('DT - number of features used: 3.0', 'RF - number of features used: 7.0')

Random state - 42 ('DT - number of features used: 3.0', 'RF - number of features used: 5.0')

[0.8012547599591731, 0.6895731340974959, 0.9218472144749, 0.7937730901899727]

[0.8682412855125715, 0.8337432078795763, 0.9636653219744876, 0.8305193093908672]

[0.9121710628859598, 0.7499171098832387, 0.9423441595215349, 0.7153725648027842]

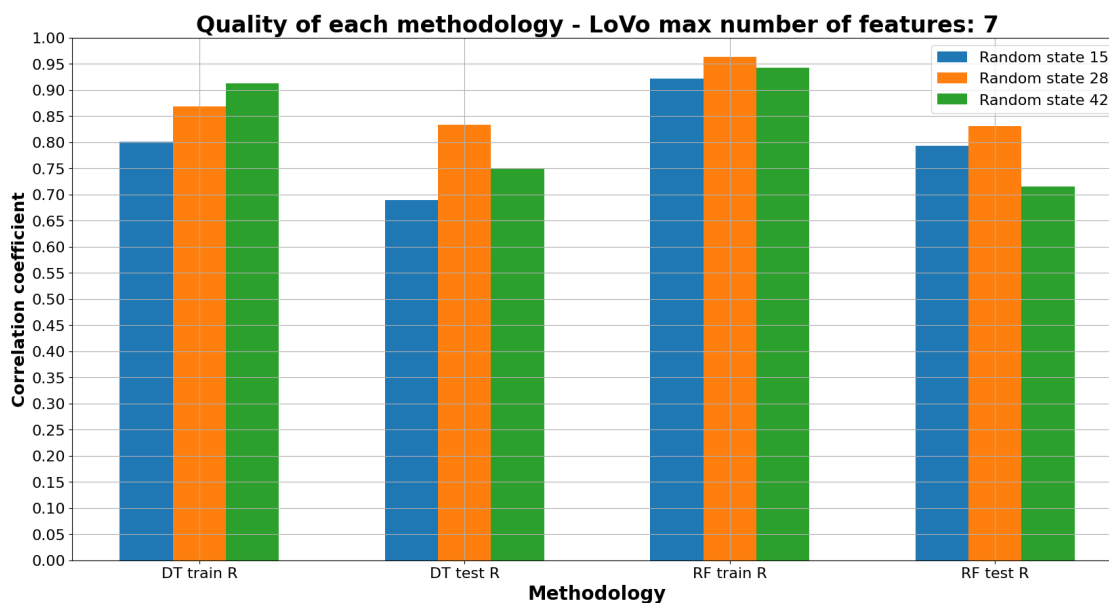

Random state - 15 ('DT - number of features used: 7.0', 'RF - number of features used: 5.0')

Random state - 28 ('DT - number of features used: 3.0', 'RF - number of features used: 7.0')

Random state - 42 ('DT - number of features used: 3.0', 'RF - number of features used: 5.0')

[0.8012547599591731, 0.6895731340974959, 0.9218472144749, 0.7937730901899727]

[0.8682412855125715, 0.8337432078795763, 0.9636653219744876, 0.8305193093908672]

[0.9121710628859598, 0.7499171098832387, 0.9423441595215349, 0.7153725648027842]

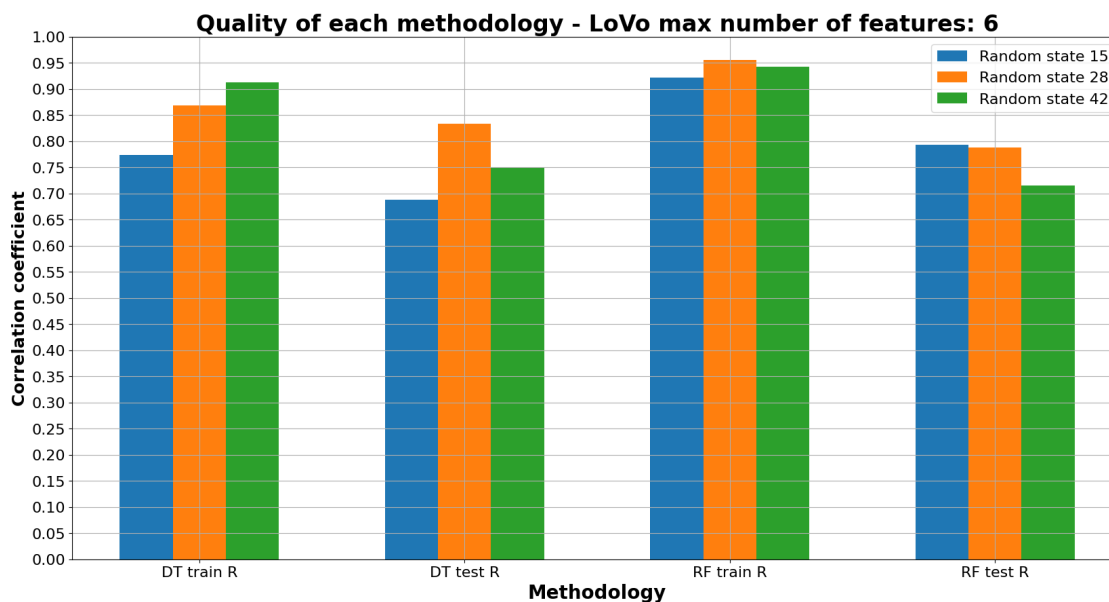

Random state - 15 ('DT - number of features used: 6.0', 'RF - number of features used: 5.0')

Random state - 28 ('DT - number of features used: 3.0', 'RF - number of features used: 6.0')

Random state - 42 ('DT - number of features used: 3.0', 'RF - number of features used: 5.0')

[0.7738495519932647, 0.6881453471088331, 0.9218472144749, 0.7937730901899727]

[0.8682412855125715, 0.8337432078795763, 0.9549618967523424, 0.7874289926703334]

[0.9121710628859598, 0.7499171098832387, 0.9423441595215349, 0.7153725648027842]

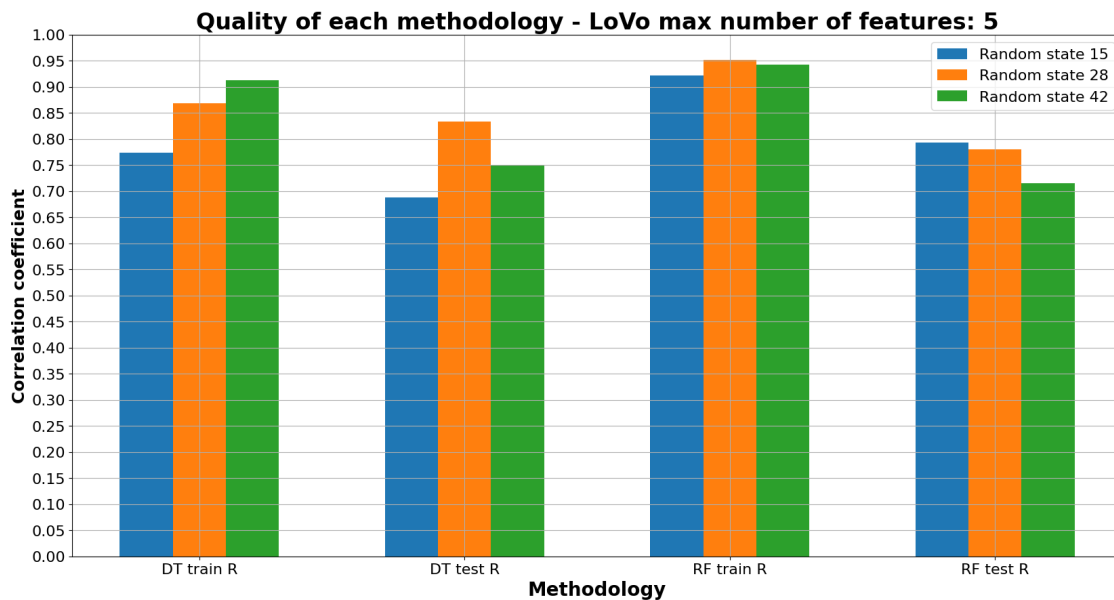

Random state - 15 ('DT - number of features used: 5.0', 'RF - number of features used: 5.0')

Random state - 28 ('DT - number of features used: 3.0', 'RF - number of features used: 5.0')

Random state - 42 ('DT - number of features used: 3.0', 'RF - number of features used: 5.0')

[0.7738495519932644, 0.688145347108833, 0.9218472144749, 0.7937730901899727]

[0.8682412855125715, 0.8337432078795763, 0.95161256233916, 0.780370388796789]

[0.9121710628859598, 0.7499171098832387, 0.9423441595215349, 0.7153725648027842]

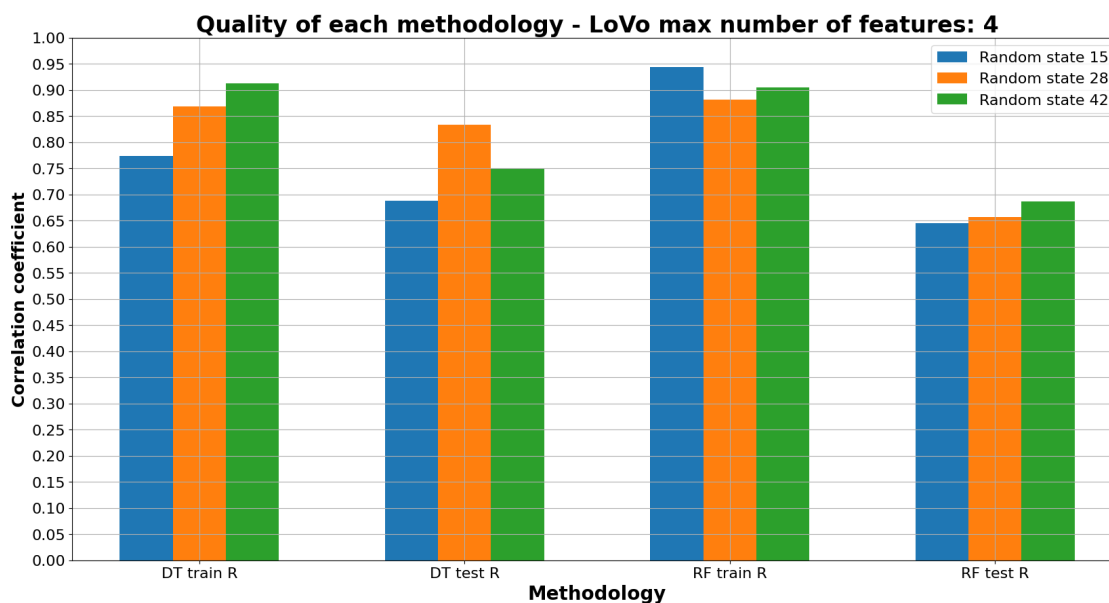

Random state - 15 ('DT - number of features used: 3.0', 'RF - number of features used: 3.0')

Random state - 28 ('DT - number of features used: 3.0', 'RF - number of features used: 2.0')

Random state - 42 ('DT - number of features used: 3.0', 'RF - number of features used: 2.0')

[0.7738495519932647, 0.6881453471088325, 0.9435896757858103, 0.6450408235184336]

[0.8682412855125715, 0.8337432078795763, 0.8811267812945673, 0.6572630628008767]

[0.9121710628859598, 0.7499171098832387, 0.9053674539315217, 0.6872057325646179]

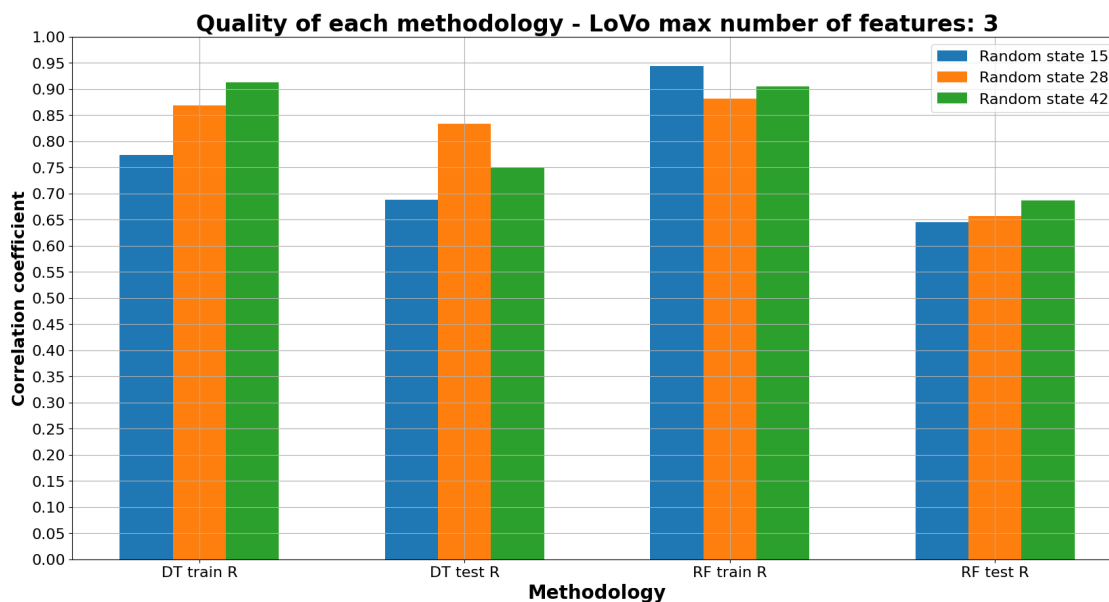

Random state - 15 ('DT - number of features used: 3.0', 'RF - number of features used: 3.0')

Random state - 28 ('DT - number of features used: 3.0', 'RF - number of features used: 2.0')

Random state - 42 ('DT - number of features used: 3.0', 'RF - number of features used: 2.0')

[0.7738495519932647, 0.6881453471088325, 0.9435896757858103, 0.6450408235184336]

[0.8682412855125715, 0.8337432078795763, 0.8811267812945673, 0.6572630628008767]

[0.9121710628859598, 0.7499171098832387, 0.9053674539315217, 0.6872057325646179]

```
[22]: for i in range(8, 5, -1):
      x = prepare_best_plot('LoVo_DX', i)
      prepare_plot(x, 'LoVo_DX', i)
      print(handle_negative_corr(x[0]))
      print(handle_negative_corr(x[1]))
      print(handle_negative_corr(x[2]))
```

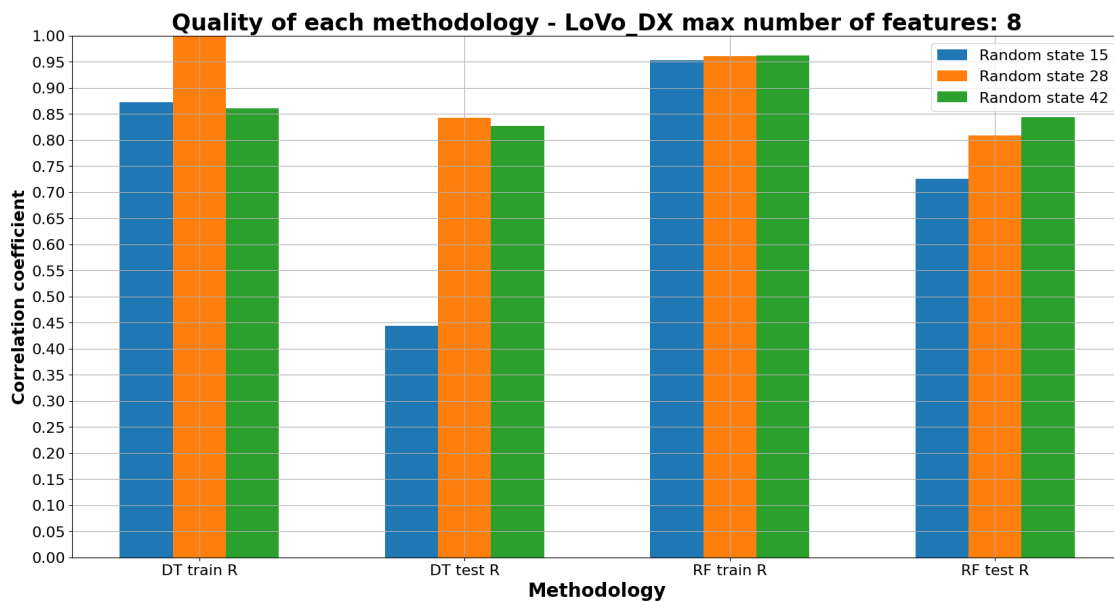

Random state - 15 ('DT - number of features used: 7.0', 'RF - number of features used: 8.0')

Random state - 28 ('DT - number of features used: 5.0', 'RF - number of features used: 8.0')

Random state - 42 ('DT - number of features used: 7.0', 'RF - number of features used: 7.0')

[0.8724994277322107, 0.44416679666061354, 0.9531465584369622, 0.7258930436657147]

[0.9998881595139364, 0.8430877655864321, 0.9608248729709339, 0.8093430351511413]

[0.8607935732823858, 0.8271783219542648, 0.9614894965852848, 0.8437279214475684]

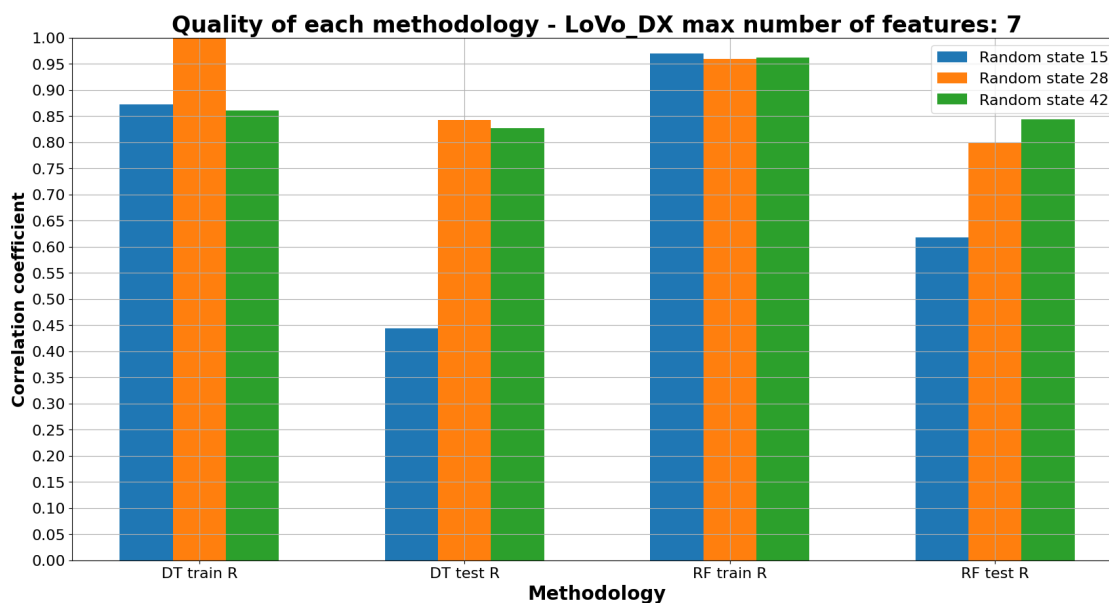

Random state - 15 ('DT - number of features used: 7.0', 'RF - number of features used: 7.0')

Random state - 28 ('DT - number of features used: 5.0', 'RF - number of features used: 7.0')

Random state - 42 ('DT - number of features used: 7.0', 'RF - number of features used: 7.0')

[0.8724994277322107, 0.44416679666061354, 0.9701730613127154, 0.6181792070920507]

[0.9998881595139364, 0.8430877655864321, 0.95913927288201, 0.7997866699043976]

[0.8607935732823858, 0.8271783219542648, 0.9614894965852848, 0.8437279214475684]

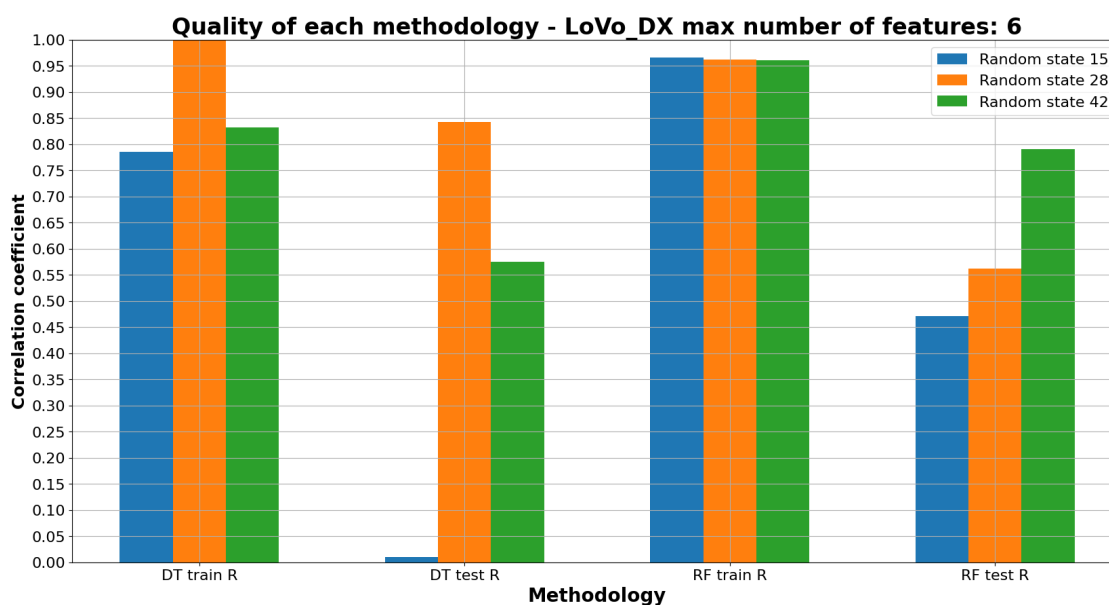

```

Random state - 15 ('DT - number of features used: 5.0', 'RF - number of features
used: 5.0')
Random state - 28 ('DT - number of features used: 5.0', 'RF - number of features
used: 5.0')
Random state - 42 ('DT - number of features used: 5.0', 'RF - number of features
used: 5.0')
[0.7851394944455857, 0.01, 0.965938844054454, 0.4715560592926372]
[0.9998881595139364, 0.8430877655864321, 0.9619512068981969, 0.5614693906239112]
[0.832498347961302, 0.5745589174162089, 0.9610074984048745, 0.790562123545645]

```

```
[ ]:
```

```

[23]: for i in range(8, 4, -1):
      x = prepare_best_plot('MCF-7', i)
      prepare_plot(x, 'MCF-7', i)
      print(handle_negative_corr(x[0]))
      print(handle_negative_corr(x[1]))
      print(handle_negative_corr(x[2]))

```

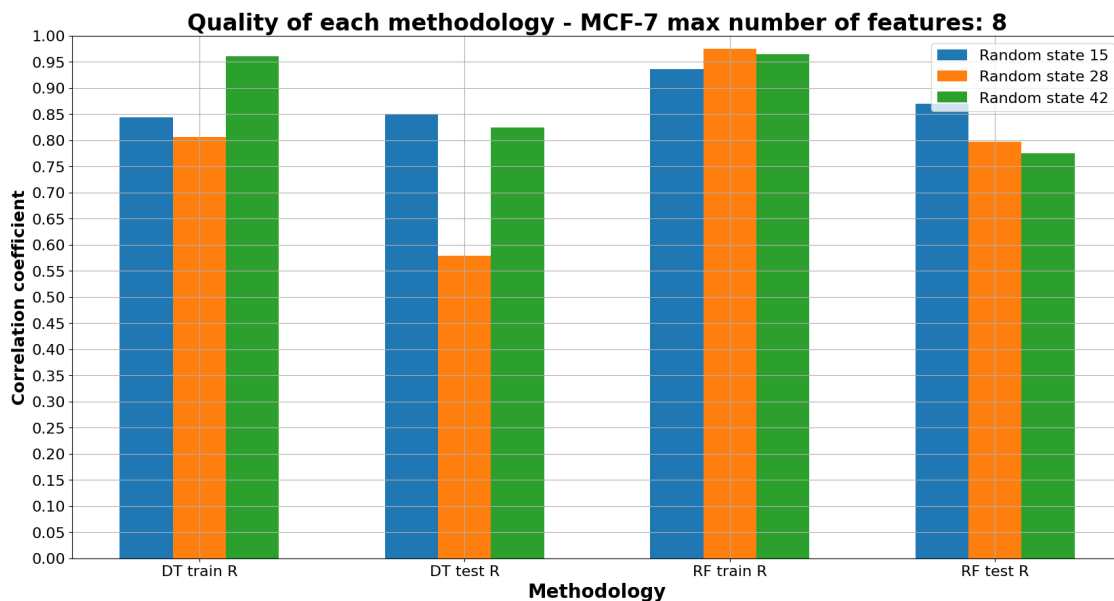

```

Random state - 15 ('DT - number of features used: 6.0', 'RF - number of features
used: 8.0')
Random state - 28 ('DT - number of features used: 4.0', 'RF - number of features
used: 8.0')
Random state - 42 ('DT - number of features used: 8.0', 'RF - number of features
used: 8.0')
[0.8435310621038742, 0.8490631015009857, 0.9361673240230982, 0.8695068587619961]

```

[0.8067266275260266, 0.5788863720704619, 0.9745022739926398, 0.7974479201634584]  
 [0.9607100088789956, 0.8246123913884399, 0.9643673177108916, 0.7746407763544272]

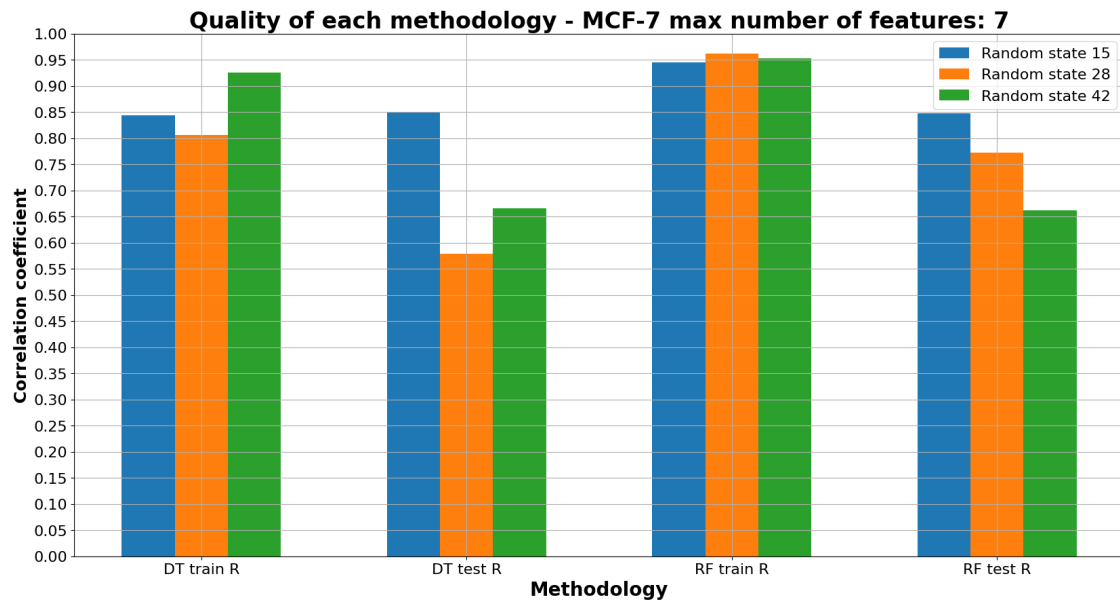

Random state - 15 ('DT - number of features used: 6.0', 'RF - number of features used: 6.0')

Random state - 28 ('DT - number of features used: 4.0', 'RF - number of features used: 6.0')

Random state - 42 ('DT - number of features used: 6.0', 'RF - number of features used: 6.0')

[0.8435310621038742, 0.8490631015009857, 0.945156244145722, 0.8470828152088354]  
 [0.8067266275260266, 0.5788863720704619, 0.9622709929006865, 0.7725823523082598]  
 [0.9250974432855168, 0.6663870801375169, 0.9527501485389981, 0.6624039809877339]



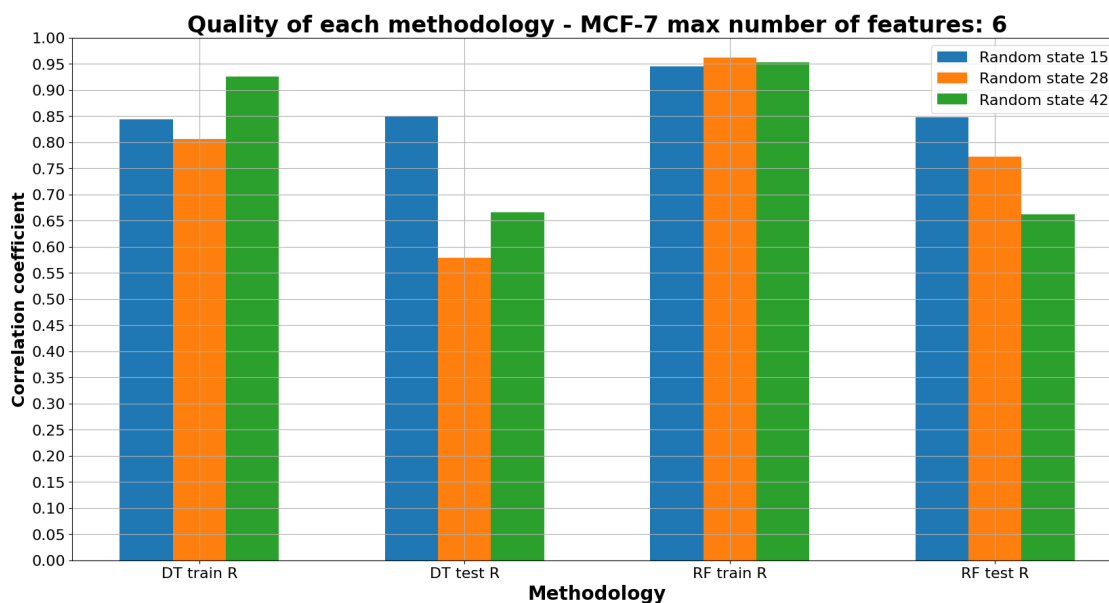

Random state - 15 ('DT - number of features used: 6.0', 'RF - number of features used: 6.0')

Random state - 28 ('DT - number of features used: 4.0', 'RF - number of features used: 6.0')

Random state - 42 ('DT - number of features used: 6.0', 'RF - number of features used: 6.0')

[0.8435310621038742, 0.8490631015009857, 0.945156244145722, 0.8470828152088354]

[0.8067266275260266, 0.5788863720704619, 0.9622709929006865, 0.7725823523082598]

[0.9250974432855168, 0.6663870801375169, 0.9527501485389981, 0.6624039809877339]

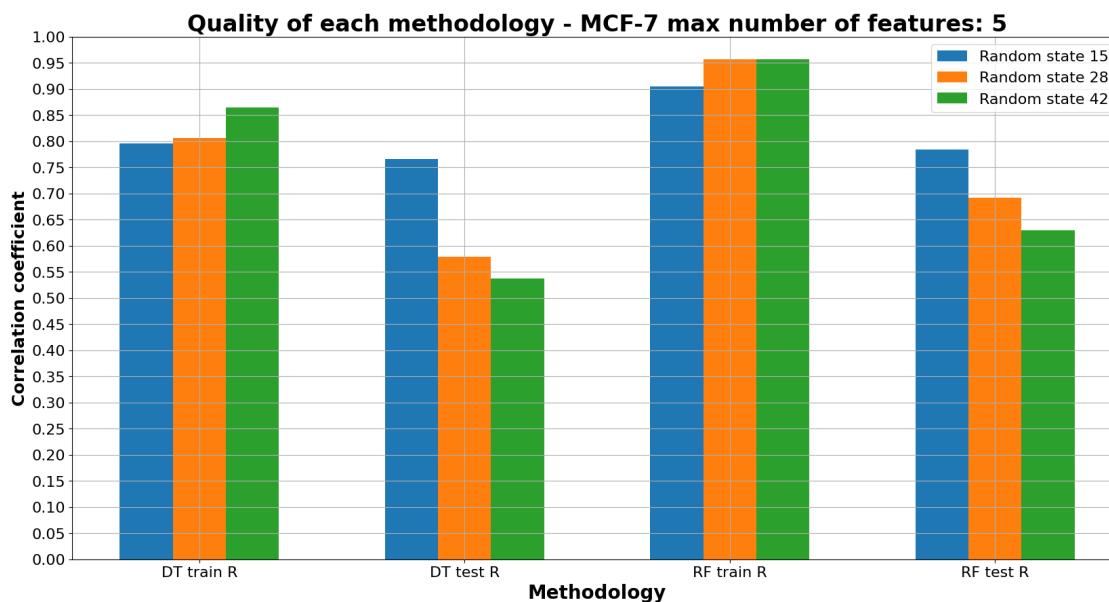

```

Random state - 15 ('DT - number of features used: 4.0', 'RF - number of features
used: 4.0')
Random state - 28 ('DT - number of features used: 4.0', 'RF - number of features
used: 4.0')
Random state - 42 ('DT - number of features used: 4.0', 'RF - number of features
used: 4.0')
[0.7959369681181857, 0.7660302989047363, 0.9051955244679118, 0.7837627386732194]
[0.8067266275260266, 0.5788863720704619, 0.9563828487646977, 0.6924899356899538]
[0.8646854500902919, 0.5371299141302905, 0.956767076965924, 0.6292292538599767]

```

[ ]:

[ ]:

## 1.7 Best models plot

Comments: (see different random states for each model)

- A549 -> random state 15, 5 features DT, 5 features RF

1. MLR (0.65, 0.55) -> 3 features
2. DT (0.92, 0.84) -> 5 features
3. RF (0.92, 0.82) -> 5 features
4. KNN (0.77, 0.83) -> 5 features
5. SVM (0.64, 0.18) -> 3 features

- BALB/3T3 -> random state 42, 6 features RF

1. MLR (0.73, 0.01) -> 3 features
2. DT (0.86, 0.75) -> 6 features
3. RF (0.93, 0.85) -> 6 features
4. KNN (0.77, 0.22) -> 3 features
5. SVM (0.68, 0.17) -> 3 features

- LoVo -> random state 28, 2 features RF

1. MLR (0.69, 0.40) -> 3 features
2. DT (0.94, 0.82) -> 5 features
3. RF (0.85, 0.70) -> 2 features
4. KNN (0.73, 0.38) -> 5 features
5. SVM (0.70, 0.01) -> 5 features

- LoVo/DX -> random state 42, 5 features RF

1. MLR (0.82, 0.78) -> 7 features
2. DT (0.86, 0.84) -> 7 features
3. RF (0.96, 0.83) -> 5 features
4. KNN (0.81, 0.01) -> 5 features
5. SVM (0.70, 0.63) -> 5 features

- MCF-7 -> random state 15, 4 features RF

1. MLR (0.70, 0.61) -> 4 features
2. DT (0.92, 0.53) -> 4 features
3. RF (0.91, 0.65) -> 4 features
4. KNN (0.70, 0.75) -> 4 features
5. SVM (0.69, 0.53) -> 4 features

```
[24]: df_a549 = pd.read_excel('../Data/Quality_A549_15_.xlsx', sheet_name='RF')
df_a549 = df_a549[df_a549['Number of features'] == 5]
df_a549['Training data R score'] = handle_negative_corr(df_a549['Training data_
↪R^2 score'])
df_a549['Test data R score'] = handle_negative_corr(df_a549['Test data R^2_
↪score'])
df_a549
```

```
[24]: Unnamed: 0 Correlation threshold Training data R^2 score \
323      323      0.50      0.852952
324      324      0.50      0.860201
325      325      0.50      0.865749
326      326      0.50      0.887848
327      327      0.50      0.888773
328      328      0.50      0.892504
329      329      0.50      0.908859
330      330      0.50      0.909170
331      331      0.50      0.913283
332      332      0.50      0.918630
333      333      0.50      0.917600
334      334      0.50      0.915991
335      335      0.50      0.921486
336      336      0.50      0.924538
337      337      0.50      0.921465
338      338      0.50      0.922737
339      339      0.50      0.924854
340      340      0.50      0.927070
341      341      0.50      0.920711
342      342      0.51      0.852952
343      343      0.51      0.860201
344      344      0.51      0.865749
345      345      0.51      0.887848
346      346      0.51      0.888773
347      347      0.51      0.892504
348      348      0.51      0.908859
349      349      0.51      0.909170
350      350      0.51      0.913283
351      351      0.51      0.918630
352      352      0.51      0.917600
353      353      0.51      0.915991
354      354      0.51      0.921486
```

|     |     |      |          |
|-----|-----|------|----------|
| 355 | 355 | 0.51 | 0.924538 |
| 356 | 356 | 0.51 | 0.921465 |
| 357 | 357 | 0.51 | 0.922737 |
| 358 | 358 | 0.51 | 0.924854 |
| 359 | 359 | 0.51 | 0.927070 |
| 360 | 360 | 0.51 | 0.920711 |

|     | Test data R <sup>2</sup> score | Training RMSE | Test RMSE | Number of features \ |
|-----|--------------------------------|---------------|-----------|----------------------|
| 323 | 0.693940                       | 0.357987      | 0.573479  | 5                    |
| 324 | 0.699356                       | 0.349052      | 0.568382  | 5                    |
| 325 | 0.668966                       | 0.342057      | 0.596418  | 5                    |
| 326 | 0.623941                       | 0.312638      | 0.635685  | 5                    |
| 327 | 0.648644                       | 0.311347      | 0.614452  | 5                    |
| 328 | 0.672695                       | 0.306080      | 0.593049  | 5                    |
| 329 | 0.683983                       | 0.281835      | 0.582732  | 5                    |
| 330 | 0.668412                       | 0.281354      | 0.596917  | 5                    |
| 331 | 0.710288                       | 0.274910      | 0.557952  | 5                    |
| 332 | 0.703868                       | 0.266300      | 0.564101  | 5                    |
| 333 | 0.707403                       | 0.267980      | 0.560723  | 5                    |
| 334 | 0.732924                       | 0.270583      | 0.535712  | 5                    |
| 335 | 0.736283                       | 0.261585      | 0.532333  | 5                    |
| 336 | 0.734897                       | 0.256449      | 0.533730  | 5                    |
| 337 | 0.729516                       | 0.261619      | 0.539119  | 5                    |
| 338 | 0.743151                       | 0.259492      | 0.525356  | 5                    |
| 339 | 0.739241                       | 0.255913      | 0.529339  | 5                    |
| 340 | 0.734946                       | 0.252110      | 0.533681  | 5                    |
| 341 | 0.737105                       | 0.262872      | 0.531502  | 5                    |
| 342 | 0.693940                       | 0.357987      | 0.573479  | 5                    |
| 343 | 0.699356                       | 0.349052      | 0.568382  | 5                    |
| 344 | 0.668966                       | 0.342057      | 0.596418  | 5                    |
| 345 | 0.623941                       | 0.312638      | 0.635685  | 5                    |
| 346 | 0.648644                       | 0.311347      | 0.614452  | 5                    |
| 347 | 0.672695                       | 0.306080      | 0.593049  | 5                    |
| 348 | 0.683983                       | 0.281835      | 0.582732  | 5                    |
| 349 | 0.668412                       | 0.281354      | 0.596917  | 5                    |
| 350 | 0.710288                       | 0.274910      | 0.557952  | 5                    |
| 351 | 0.703868                       | 0.266300      | 0.564101  | 5                    |
| 352 | 0.707403                       | 0.267980      | 0.560723  | 5                    |
| 353 | 0.732924                       | 0.270583      | 0.535712  | 5                    |
| 354 | 0.736283                       | 0.261585      | 0.532333  | 5                    |
| 355 | 0.734897                       | 0.256449      | 0.533730  | 5                    |
| 356 | 0.729516                       | 0.261619      | 0.539119  | 5                    |
| 357 | 0.743151                       | 0.259492      | 0.525356  | 5                    |
| 358 | 0.739241                       | 0.255913      | 0.529339  | 5                    |
| 359 | 0.734946                       | 0.252110      | 0.533681  | 5                    |
| 360 | 0.737105                       | 0.262872      | 0.531502  | 5                    |

|     | Number of estimators | Training data R score | Test data R score |
|-----|----------------------|-----------------------|-------------------|
| 323 | 2                    | 0.923554              | 0.833031          |
| 324 | 3                    | 0.927470              | 0.836275          |
| 325 | 4                    | 0.930456              | 0.817903          |
| 326 | 5                    | 0.942257              | 0.789899          |
| 327 | 6                    | 0.942747              | 0.805384          |
| 328 | 7                    | 0.944724              | 0.820180          |
| 329 | 8                    | 0.953341              | 0.827033          |
| 330 | 9                    | 0.953504              | 0.817564          |
| 331 | 10                   | 0.955658              | 0.842786          |
| 332 | 11                   | 0.958452              | 0.838968          |
| 333 | 12                   | 0.957914              | 0.841073          |
| 334 | 13                   | 0.957074              | 0.856110          |
| 335 | 14                   | 0.959941              | 0.858069          |
| 336 | 15                   | 0.961529              | 0.857261          |
| 337 | 16                   | 0.959930              | 0.854117          |
| 338 | 17                   | 0.960592              | 0.862062          |
| 339 | 18                   | 0.961693              | 0.859791          |
| 340 | 19                   | 0.962845              | 0.857290          |
| 341 | 20                   | 0.959537              | 0.858548          |
| 342 | 2                    | 0.923554              | 0.833031          |
| 343 | 3                    | 0.927470              | 0.836275          |
| 344 | 4                    | 0.930456              | 0.817903          |
| 345 | 5                    | 0.942257              | 0.789899          |
| 346 | 6                    | 0.942747              | 0.805384          |
| 347 | 7                    | 0.944724              | 0.820180          |
| 348 | 8                    | 0.953341              | 0.827033          |
| 349 | 9                    | 0.953504              | 0.817564          |
| 350 | 10                   | 0.955658              | 0.842786          |
| 351 | 11                   | 0.958452              | 0.838968          |
| 352 | 12                   | 0.957914              | 0.841073          |
| 353 | 13                   | 0.957074              | 0.856110          |
| 354 | 14                   | 0.959941              | 0.858069          |
| 355 | 15                   | 0.961529              | 0.857261          |
| 356 | 16                   | 0.959930              | 0.854117          |
| 357 | 17                   | 0.960592              | 0.862062          |
| 358 | 18                   | 0.961693              | 0.859791          |
| 359 | 19                   | 0.962845              | 0.857290          |
| 360 | 20                   | 0.959537              | 0.858548          |

```
[25]: df_ = pd.read_excel('../Data/Quality_BALB_3T3_42_.xlsx', sheet_name='RF')
df_ = df_[df_['Number of features'] == 6]
df_['Training data R score'] = handle_negative_corr(df_['Training data R^2_
↵score'])
df_['Test data R score'] = handle_negative_corr(df_['Test data R^2 score'])
df_
```

```

[25]: Unnamed: 0 Correlation threshold Training data R^2 score \
342      342      0.51      0.869233
343      343      0.51      0.923683
344      344      0.51      0.934524
345      345      0.51      0.937457
346      346      0.51      0.929701
347      347      0.51      0.940844
348      348      0.51      0.945992
349      349      0.51      0.943862
350      350      0.51      0.940881
351      351      0.51      0.940214
352      352      0.51      0.939011
353      353      0.51      0.939990
354      354      0.51      0.941761
355      355      0.51      0.945607
356      356      0.51      0.946995
357      357      0.51      0.948830
358      358      0.51      0.946417
359      359      0.51      0.944971
360      360      0.51      0.943980

      Test data R^2 score Training RMSE Test RMSE Number of features \
342      0.716186      0.318598      0.424152      6
343      0.597886      0.243391      0.504870      6
344      0.681066      0.225443      0.449630      6
345      0.701507      0.220334      0.434983      6
346      0.675674      0.233598      0.453414      6
347      0.604822      0.214286      0.500497      6
348      0.648896      0.204749      0.471762      6
349      0.649432      0.208749      0.471401      6
350      0.665910      0.214219      0.460189      6
351      0.664213      0.215424      0.461356      6
352      0.683600      0.217581      0.447840      6
353      0.657975      0.215827      0.465622      6
354      0.616112      0.212619      0.493295      6
355      0.597845      0.205478      0.504895      6
356      0.570470      0.202840      0.521797      6
357      0.577984      0.199298      0.517213      6
358      0.591313      0.203942      0.508979      6
359      0.588724      0.206677      0.510589      6
360      0.591825      0.208528      0.508661      6

      Number of estimators Training data R score Test data R score
342      2      0.932327      0.846278
343      3      0.961084      0.773231
344      4      0.966708      0.825268
345      5      0.968224      0.837560

```

|     |    |          |          |
|-----|----|----------|----------|
| 346 | 6  | 0.964210 | 0.821994 |
| 347 | 7  | 0.969971 | 0.777703 |
| 348 | 8  | 0.972621 | 0.805541 |
| 349 | 9  | 0.971525 | 0.805873 |
| 350 | 10 | 0.969990 | 0.816033 |
| 351 | 11 | 0.969646 | 0.814993 |
| 352 | 12 | 0.969026 | 0.826801 |
| 353 | 13 | 0.969531 | 0.811157 |
| 354 | 14 | 0.970444 | 0.784928 |
| 355 | 15 | 0.972423 | 0.773204 |
| 356 | 16 | 0.973136 | 0.755294 |
| 357 | 17 | 0.974079 | 0.760253 |
| 358 | 18 | 0.972840 | 0.768969 |
| 359 | 19 | 0.972096 | 0.767284 |
| 360 | 20 | 0.971586 | 0.769301 |

```
[ ]:
```

```
[26]: df_ = pd.read_excel('../Data/Quality_LoVo_28_.xlsx', sheet_name='RF')
df_ = df_[df_['Number of features'] == 2]
df_['Training data R score'] = handle_negative_corr(df_['Training data R^2_
↪score'])
df_['Test data R score'] = handle_negative_corr(df_['Test data R^2 score'])
df_
```

```
[26]: Unnamed: 0 Correlation threshold Training data R^2 score \
380 380 0.53 0.726452
381 381 0.53 0.730699
382 382 0.53 0.729826
383 383 0.53 0.755753
384 384 0.53 0.772016
385 385 0.53 0.771714
386 386 0.53 0.773504
387 387 0.53 0.772194
388 388 0.53 0.770797
389 389 0.53 0.777861
390 390 0.53 0.780498
391 391 0.53 0.779444
392 392 0.53 0.783158
393 393 0.53 0.778982
394 394 0.53 0.780691
395 395 0.53 0.781139
396 396 0.53 0.776384
397 397 0.53 0.775154
398 398 0.53 0.775951
399 399 0.54 0.726452
400 400 0.54 0.730699
```

|     |     |      |          |
|-----|-----|------|----------|
| 401 | 401 | 0.54 | 0.729826 |
| 402 | 402 | 0.54 | 0.755753 |
| 403 | 403 | 0.54 | 0.772016 |
| 404 | 404 | 0.54 | 0.771714 |
| 405 | 405 | 0.54 | 0.773504 |
| 406 | 406 | 0.54 | 0.772194 |
| 407 | 407 | 0.54 | 0.770797 |
| 408 | 408 | 0.54 | 0.777861 |
| 409 | 409 | 0.54 | 0.780498 |
| 410 | 410 | 0.54 | 0.779444 |
| 411 | 411 | 0.54 | 0.783158 |
| 412 | 412 | 0.54 | 0.778982 |
| 413 | 413 | 0.54 | 0.780691 |
| 414 | 414 | 0.54 | 0.781139 |
| 415 | 415 | 0.54 | 0.776384 |
| 416 | 416 | 0.54 | 0.775154 |
| 417 | 417 | 0.54 | 0.775951 |

|     | Test data R <sup>2</sup> score | Training RMSE | Test RMSE | Number of features \ |
|-----|--------------------------------|---------------|-----------|----------------------|
| 380 | 0.267403                       | 0.490898      | 0.573263  | 2                    |
| 381 | 0.199666                       | 0.487072      | 0.599180  | 2                    |
| 382 | 0.237774                       | 0.487861      | 0.584741  | 2                    |
| 383 | 0.311228                       | 0.463862      | 0.555852  | 2                    |
| 384 | 0.352617                       | 0.448153      | 0.538893  | 2                    |
| 385 | 0.376864                       | 0.448449      | 0.528704  | 2                    |
| 386 | 0.352702                       | 0.446688      | 0.538857  | 2                    |
| 387 | 0.319981                       | 0.447978      | 0.552309  | 2                    |
| 388 | 0.336020                       | 0.449349      | 0.545757  | 2                    |
| 389 | 0.334133                       | 0.442371      | 0.546531  | 2                    |
| 390 | 0.299672                       | 0.439737      | 0.560496  | 2                    |
| 391 | 0.317294                       | 0.440791      | 0.553399  | 2                    |
| 392 | 0.339342                       | 0.437064      | 0.544390  | 2                    |
| 393 | 0.395078                       | 0.441253      | 0.520920  | 2                    |
| 394 | 0.403927                       | 0.439544      | 0.517096  | 2                    |
| 395 | 0.403071                       | 0.439095      | 0.517467  | 2                    |
| 396 | 0.431995                       | 0.443838      | 0.504775  | 2                    |
| 397 | 0.404526                       | 0.445058      | 0.516836  | 2                    |
| 398 | 0.380702                       | 0.444269      | 0.527074  | 2                    |
| 399 | 0.267403                       | 0.490898      | 0.573263  | 2                    |
| 400 | 0.199666                       | 0.487072      | 0.599180  | 2                    |
| 401 | 0.237774                       | 0.487861      | 0.584741  | 2                    |
| 402 | 0.311228                       | 0.463862      | 0.555852  | 2                    |
| 403 | 0.352617                       | 0.448153      | 0.538893  | 2                    |
| 404 | 0.376864                       | 0.448449      | 0.528704  | 2                    |
| 405 | 0.352702                       | 0.446688      | 0.538857  | 2                    |
| 406 | 0.319981                       | 0.447978      | 0.552309  | 2                    |
| 407 | 0.336020                       | 0.449349      | 0.545757  | 2                    |



|     |          |          |          |   |
|-----|----------|----------|----------|---|
| 408 | 0.334133 | 0.442371 | 0.546531 | 2 |
| 409 | 0.299672 | 0.439737 | 0.560496 | 2 |
| 410 | 0.317294 | 0.440791 | 0.553399 | 2 |
| 411 | 0.339342 | 0.437064 | 0.544390 | 2 |
| 412 | 0.395078 | 0.441253 | 0.520920 | 2 |
| 413 | 0.403927 | 0.439544 | 0.517096 | 2 |
| 414 | 0.403071 | 0.439095 | 0.517467 | 2 |
| 415 | 0.431995 | 0.443838 | 0.504775 | 2 |
| 416 | 0.404526 | 0.445058 | 0.516836 | 2 |
| 417 | 0.380702 | 0.444269 | 0.527074 | 2 |

|     | Number of estimators | Training data R score | Test data R score |
|-----|----------------------|-----------------------|-------------------|
| 380 | 2                    | 0.852321              | 0.517110          |
| 381 | 3                    | 0.854809              | 0.446839          |
| 382 | 4                    | 0.854298              | 0.487620          |
| 383 | 5                    | 0.869341              | 0.557879          |
| 384 | 6                    | 0.878644              | 0.593815          |
| 385 | 7                    | 0.878473              | 0.613892          |
| 386 | 8                    | 0.879491              | 0.593887          |
| 387 | 9                    | 0.878746              | 0.565669          |
| 388 | 10                   | 0.877951              | 0.579672          |
| 389 | 11                   | 0.881964              | 0.578042          |
| 390 | 12                   | 0.883458              | 0.547423          |
| 391 | 13                   | 0.882861              | 0.563289          |
| 392 | 14                   | 0.884962              | 0.582531          |
| 393 | 15                   | 0.882600              | 0.628552          |
| 394 | 16                   | 0.883567              | 0.635553          |
| 395 | 17                   | 0.883821              | 0.634879          |
| 396 | 18                   | 0.881127              | 0.657263          |
| 397 | 19                   | 0.880428              | 0.636024          |
| 398 | 20                   | 0.880881              | 0.617010          |
| 399 | 2                    | 0.852321              | 0.517110          |
| 400 | 3                    | 0.854809              | 0.446839          |
| 401 | 4                    | 0.854298              | 0.487620          |
| 402 | 5                    | 0.869341              | 0.557879          |
| 403 | 6                    | 0.878644              | 0.593815          |
| 404 | 7                    | 0.878473              | 0.613892          |
| 405 | 8                    | 0.879491              | 0.593887          |
| 406 | 9                    | 0.878746              | 0.565669          |
| 407 | 10                   | 0.877951              | 0.579672          |
| 408 | 11                   | 0.881964              | 0.578042          |
| 409 | 12                   | 0.883458              | 0.547423          |
| 410 | 13                   | 0.882861              | 0.563289          |
| 411 | 14                   | 0.884962              | 0.582531          |
| 412 | 15                   | 0.882600              | 0.628552          |
| 413 | 16                   | 0.883567              | 0.635553          |
| 414 | 17                   | 0.883821              | 0.634879          |

|     |    |          |          |
|-----|----|----------|----------|
| 415 | 18 | 0.881127 | 0.657263 |
| 416 | 19 | 0.880428 | 0.636024 |
| 417 | 20 | 0.880881 | 0.617010 |

[ ]:

```
[27]: df_ = pd.read_excel('../Data/Quality_LoVo_DX_42_.xlsx', sheet_name='RF')
df_ = df_[df_['Number of features'] == 5]
df_['Training data R score'] = handle_negative_corr(df_['Training data R^2_↵
score'])
df_['Test data R score'] = handle_negative_corr(df_['Test data R^2 score'])
df_
```

```
[27]: Unnamed: 0 Correlation threshold Training data R^2 score \
570      570      0.63      0.849392
571      571      0.63      0.877695
572      572      0.63      0.886607
573      573      0.63      0.894969
574      574      0.63      0.904921
575      575      0.63      0.918333
576      576      0.63      0.916942
577      577      0.63      0.923954
578      578      0.63      0.918480
579      579      0.63      0.920255
580      580      0.63      0.916592
581      581      0.63      0.916344
582      582      0.63      0.923535
583      583      0.63      0.927928
584      584      0.63      0.931174
585      585      0.63      0.934467
586      586      0.63      0.935167
587      587      0.63      0.937938
588      588      0.63      0.937747

Test data R^2 score Training RMSE Test RMSE Number of features \
570      0.290146      0.373186      0.608242      5
571      0.320146      0.336297      0.595251      5
572      0.387461      0.323813      0.565014      5
573      0.467702      0.311645      0.526707      5
574      0.516674      0.296513      0.501895      5
575      0.530785      0.274806      0.494514      5
576      0.617333      0.277136      0.446583      5
577      0.602381      0.265179      0.455225      5
578      0.586091      0.274558      0.464456      5
579      0.563115      0.271552      0.477173      5
580      0.592591      0.277719      0.460795      5
581      0.612007      0.278132      0.449681      5
```

|     |          |          |          |   |
|-----|----------|----------|----------|---|
| 582 | 0.624988 | 0.265908 | 0.442094 | 5 |
| 583 | 0.607313 | 0.258158 | 0.452393 | 5 |
| 584 | 0.616693 | 0.252278 | 0.446957 | 5 |
| 585 | 0.605643 | 0.246168 | 0.453354 | 5 |
| 586 | 0.608711 | 0.244850 | 0.451587 | 5 |
| 587 | 0.602155 | 0.239559 | 0.455354 | 5 |
| 588 | 0.598890 | 0.239929 | 0.457218 | 5 |

|     | Number of estimators | Training data R score | Test data R score |
|-----|----------------------|-----------------------|-------------------|
| 570 | 2                    | 0.921625              | 0.538652          |
| 571 | 3                    | 0.936854              | 0.565815          |
| 572 | 4                    | 0.941598              | 0.622463          |
| 573 | 5                    | 0.946028              | 0.683888          |
| 574 | 6                    | 0.951273              | 0.718800          |
| 575 | 7                    | 0.958297              | 0.728550          |
| 576 | 8                    | 0.957571              | 0.785706          |
| 577 | 9                    | 0.961225              | 0.776132          |
| 578 | 10                   | 0.958374              | 0.765566          |
| 579 | 11                   | 0.959299              | 0.750410          |
| 580 | 12                   | 0.957388              | 0.769800          |
| 581 | 13                   | 0.957258              | 0.782309          |
| 582 | 14                   | 0.961007              | 0.790562          |
| 583 | 15                   | 0.963290              | 0.779303          |
| 584 | 16                   | 0.964973              | 0.785298          |
| 585 | 17                   | 0.966678              | 0.778231          |
| 586 | 18                   | 0.967040              | 0.780199          |
| 587 | 19                   | 0.968472              | 0.775987          |
| 588 | 20                   | 0.968373              | 0.773880          |

```
[ ]:
```

```
[28]: df_ = pd.read_excel('../Data/Quality_MCF-7_15_.xlsx', sheet_name='RF')
df_ = df_[df_['Number of features'] == 4]
df_['Training data R score'] = handle_negative_corr(df_['Training data R^2 score'])
df_['Test data R score'] = handle_negative_corr(df_['Test data R^2 score'])
df_
```

```
[28]: Unnamed: 0 Correlation threshold Training data R^2 score \
323 323 0.50 0.823725
324 324 0.50 0.819379
325 325 0.50 0.861725
326 326 0.50 0.861772
327 327 0.50 0.876076
328 328 0.50 0.887302
329 329 0.50 0.891312
330 330 0.50 0.885151
```

|     |     |      |          |
|-----|-----|------|----------|
| 331 | 331 | 0.50 | 0.897883 |
| 332 | 332 | 0.50 | 0.900694 |
| 333 | 333 | 0.50 | 0.898891 |
| 334 | 334 | 0.50 | 0.897355 |
| 335 | 335 | 0.50 | 0.903932 |
| 336 | 336 | 0.50 | 0.902161 |
| 337 | 337 | 0.50 | 0.897602 |
| 338 | 338 | 0.50 | 0.901345 |
| 339 | 339 | 0.50 | 0.903325 |
| 340 | 340 | 0.50 | 0.909007 |
| 341 | 341 | 0.50 | 0.910494 |
| 342 | 342 | 0.51 | 0.823725 |
| 343 | 343 | 0.51 | 0.819379 |
| 344 | 344 | 0.51 | 0.861725 |
| 345 | 345 | 0.51 | 0.861772 |
| 346 | 346 | 0.51 | 0.876076 |
| 347 | 347 | 0.51 | 0.887302 |
| 348 | 348 | 0.51 | 0.891312 |
| 349 | 349 | 0.51 | 0.885151 |
| 350 | 350 | 0.51 | 0.897883 |
| 351 | 351 | 0.51 | 0.900694 |
| 352 | 352 | 0.51 | 0.898891 |
| 353 | 353 | 0.51 | 0.897355 |
| 354 | 354 | 0.51 | 0.903932 |
| 355 | 355 | 0.51 | 0.902161 |
| 356 | 356 | 0.51 | 0.897602 |
| 357 | 357 | 0.51 | 0.901345 |
| 358 | 358 | 0.51 | 0.903325 |
| 359 | 359 | 0.51 | 0.909007 |
| 360 | 360 | 0.51 | 0.910494 |

|     | Test data $R^2$ score | Training RMSE | Test RMSE | Number of features \ |
|-----|-----------------------|---------------|-----------|----------------------|
| 323 | 0.492083              | 0.390625      | 0.767939  | 4                    |
| 324 | 0.614284              | 0.395412      | 0.669213  | 4                    |
| 325 | 0.495651              | 0.345969      | 0.765237  | 4                    |
| 326 | 0.472072              | 0.345911      | 0.782920  | 4                    |
| 327 | 0.532895              | 0.327523      | 0.736440  | 4                    |
| 328 | 0.499692              | 0.312337      | 0.762165  | 4                    |
| 329 | 0.494367              | 0.306729      | 0.766211  | 4                    |
| 330 | 0.462619              | 0.315304      | 0.789899  | 4                    |
| 331 | 0.422784              | 0.297314      | 0.818652  | 4                    |
| 332 | 0.424585              | 0.293192      | 0.817374  | 4                    |
| 333 | 0.451898              | 0.295842      | 0.797739  | 4                    |
| 334 | 0.480492              | 0.298081      | 0.776652  | 4                    |
| 335 | 0.482197              | 0.288373      | 0.775377  | 4                    |
| 336 | 0.522720              | 0.291019      | 0.744418  | 4                    |
| 337 | 0.531393              | 0.297722      | 0.737623  | 4                    |

|     |          |          |          |   |
|-----|----------|----------|----------|---|
| 338 | 0.536501 | 0.292231 | 0.733593 | 4 |
| 339 | 0.532348 | 0.289282 | 0.736871 | 4 |
| 340 | 0.534079 | 0.280653 | 0.735506 | 4 |
| 341 | 0.539028 | 0.278349 | 0.731589 | 4 |
| 342 | 0.492083 | 0.390625 | 0.767939 | 4 |
| 343 | 0.614284 | 0.395412 | 0.669213 | 4 |
| 344 | 0.495651 | 0.345969 | 0.765237 | 4 |
| 345 | 0.472072 | 0.345911 | 0.782920 | 4 |
| 346 | 0.532895 | 0.327523 | 0.736440 | 4 |
| 347 | 0.499692 | 0.312337 | 0.762165 | 4 |
| 348 | 0.494367 | 0.306729 | 0.766211 | 4 |
| 349 | 0.462619 | 0.315304 | 0.789899 | 4 |
| 350 | 0.422784 | 0.297314 | 0.818652 | 4 |
| 351 | 0.424585 | 0.293192 | 0.817374 | 4 |
| 352 | 0.451898 | 0.295842 | 0.797739 | 4 |
| 353 | 0.480492 | 0.298081 | 0.776652 | 4 |
| 354 | 0.482197 | 0.288373 | 0.775377 | 4 |
| 355 | 0.522720 | 0.291019 | 0.744418 | 4 |
| 356 | 0.531393 | 0.297722 | 0.737623 | 4 |
| 357 | 0.536501 | 0.292231 | 0.733593 | 4 |
| 358 | 0.532348 | 0.289282 | 0.736871 | 4 |
| 359 | 0.534079 | 0.280653 | 0.735506 | 4 |
| 360 | 0.539028 | 0.278349 | 0.731589 | 4 |

|     | Number of estimators | Training data R score | Test data R score |
|-----|----------------------|-----------------------|-------------------|
| 323 | 2                    | 0.907593              | 0.701486          |
| 324 | 3                    | 0.905196              | 0.783763          |
| 325 | 4                    | 0.928291              | 0.704025          |
| 326 | 5                    | 0.928317              | 0.687075          |
| 327 | 6                    | 0.935989              | 0.729997          |
| 328 | 7                    | 0.941967              | 0.706889          |
| 329 | 8                    | 0.944093              | 0.703112          |
| 330 | 9                    | 0.940824              | 0.680161          |
| 331 | 10                   | 0.947567              | 0.650219          |
| 332 | 11                   | 0.949049              | 0.651602          |
| 333 | 12                   | 0.948099              | 0.672234          |
| 334 | 13                   | 0.947288              | 0.693176          |
| 335 | 14                   | 0.950753              | 0.694404          |
| 336 | 15                   | 0.949821              | 0.722994          |
| 337 | 16                   | 0.947419              | 0.728967          |
| 338 | 17                   | 0.949392              | 0.732462          |
| 339 | 18                   | 0.950434              | 0.729622          |
| 340 | 19                   | 0.953419              | 0.730807          |
| 341 | 20                   | 0.954198              | 0.734186          |
| 342 | 2                    | 0.907593              | 0.701486          |
| 343 | 3                    | 0.905196              | 0.783763          |
| 344 | 4                    | 0.928291              | 0.704025          |

|     |    |          |          |
|-----|----|----------|----------|
| 345 | 5  | 0.928317 | 0.687075 |
| 346 | 6  | 0.935989 | 0.729997 |
| 347 | 7  | 0.941967 | 0.706889 |
| 348 | 8  | 0.944093 | 0.703112 |
| 349 | 9  | 0.940824 | 0.680161 |
| 350 | 10 | 0.947567 | 0.650219 |
| 351 | 11 | 0.949049 | 0.651602 |
| 352 | 12 | 0.948099 | 0.672234 |
| 353 | 13 | 0.947288 | 0.693176 |
| 354 | 14 | 0.950753 | 0.694404 |
| 355 | 15 | 0.949821 | 0.722994 |
| 356 | 16 | 0.947419 | 0.728967 |
| 357 | 17 | 0.949392 | 0.732462 |
| 358 | 18 | 0.950434 | 0.729622 |
| 359 | 19 | 0.953419 | 0.730807 |
| 360 | 20 | 0.954198 | 0.734186 |

[ ]:

# Notebook

January 18, 2024

## 1 File 30a

```
[1]: import glob
import pandas as pd
import matplotlib.pyplot as plt
import numpy as np
SMALL_SIZE = 16
MEDIUM_SIZE = 18
BIGGER_SIZE = 20

plt.rc('font', size=SMALL_SIZE)          # controls default text sizes
plt.rc('axes', titlesize=SMALL_SIZE)     # fontsize of the axes title
plt.rc('axes', labelsiz=SMALL_SIZE)      # fontsize of the x and y labels
plt.rc('xtick', labelsiz=SMALL_SIZE)     # fontsize of the tick labels
plt.rc('ytick', labelsiz=SMALL_SIZE)     # fontsize of the tick labels
plt.rc('legend', fontsize=SMALL_SIZE)    # legend fontsize
plt.rc('figure', titlesize=BIGGER_SIZE)  # fontsize of the figure title

[2]: sheet_names = ['MLR', 'DT', 'RF', 'KNN', 'SVM']
x_ticks = ['MLR train', 'MLR test', 'DT train', 'DT test', 'RF train', 'RF_
↳test', 'KNN train', 'KNN test', 'SVM train', 'SVM test']
random_states = [15, 28, 42]

[3]: def prepare_histogram_data(target_name, max_number_of_features):

    excel_files = []

    for name in glob.glob('../Data/Quality_'+str(target_name)+'*'):
        excel_files.append(name)

    random_state_15 = []
    random_state_28 = []
    random_state_42 = []
    features_15 = []
    features_28 = []
    features_42 = []
    random_states = [15, 28, 42]
```

```

for random_state in range(len(random_states)):
    tmp = []
    to_plot = []
    values = []
    number_of_features = []
    for sheet in sheet_names:
        tmp.append(pd.read_excel(excel_files[random_state],
↪sheet_name=sheet))
    for data in tmp:
        temp = data[data['Number of features'] <= max_number_of_features]
        to_plot.append(temp[temp['Test RMSE'] == min(temp['Test RMSE'])])
    for value in to_plot:
        values.append(value['Training RMSE'].tail(1))
        values.append(value['Test RMSE'].tail(1))
        number_of_features.append(value['Number of features'].tail(1))
        #values.append(value['Training RMSE'].head(1))
        #values.append(value['Test RMSE'].head(1))
        #number_of_features.append(value['Number of features'].head(1))
    for element in values:
        if random_state == 0:
            random_state_15.append(float(element))
        elif random_state == 1:
            random_state_28.append(float(element))
        elif random_state == 2:
            random_state_42.append(float(element))
        else:
            print("Error with conditions...")

    for features in number_of_features:
        if random_state == 0:
            features_15.append(float(features))
        elif random_state == 1:
            features_28.append(float(features))
        elif random_state == 2:
            features_42.append(float(features))
        else:
            print("Error with conditions...")

    return random_state_15, random_state_28, random_state_42, features_15,
↪features_28, features_42

```

```

[4]: def handle_negative_corr(list_):
    res = []
    for element in list_:
        if element < 0:

```



```

        res.append(0.01)
    else:
        res.append(np.sqrt(element))
return res

```

```

[5]: def prepare_plot(data, name, max_number_of_features):

    fig = plt.figure(figsize=(20,10))
    X = x_ticks
    y_15 = data[0] #handle_negative_corr(data[0])
    y_28 = data[1] #handle_negative_corr(data[1])
    y_42 = data[2] #handle_negative_corr(data[2])

    X_axis = np.arange(len(X))
    #y_ax = [x/100 for x in range(0, 105, 5)]
    #plt.yticks(y_ax)
    plt.bar(X_axis - 0.2, y_15, 0.2, label = 'Random state 15')
    plt.bar(X_axis + 0.0, y_28, 0.2, label = 'Random state 28')
    plt.bar(X_axis + 0.2, y_42, 0.2, label = 'Random state 42')

    plt.xticks(X_axis, X, weight='bold', fontsize=14)
    plt.xlabel("Methodology", fontsize=20, weight='bold')
    plt.ylabel("RMSE", fontsize=18, weight='bold')
    #plt.ylim([0.0, 1.0])
    plt.title("Quality of each methodology - "+str(name)+' '+str('max number of_
    ↪features: '+str(max_number_of_features)), fontsize=24, weight='bold')
    plt.grid(visible=True)
    plt.legend()
    plt.savefig('Figures/'+ '_' +str(name)+'_'+str(max_number_of_features)+'_'+'.
    ↪pdf', bbox_inches='tight') #new line
    plt.show()
    for i, state in enumerate(random_states):
        print('Random state - '+str(state)+'_
    ↪'+str(update_description(sheet_names, data[i+3])))

```

```

[6]: def update_description(x_axis_labels, number_of_features):

    MLR = str(x_axis_labels[0])+' - number of features used:_
    ↪'+str(number_of_features[0])
    DT = str(x_axis_labels[1])+' - number of features used:_
    ↪'+str(number_of_features[1])
    RF = str(x_axis_labels[2])+' - number of features used:_
    ↪'+str(number_of_features[2])
    KNN = str(x_axis_labels[3])+' - number of features used:_
    ↪'+str(number_of_features[3])
    SVM = str(x_axis_labels[4])+' - number of features used:_
    ↪'+str(number_of_features[4])

```

```
return MLR, DT, RF, KNN, SVM
```

## 1.1 A549

```
[7]: a549 = prepare_histogram_data('A549', 8)
```

```
[8]: a549
```

```
[8]: ([0.7059969481770844,  
      0.6334055419392647,  
      0.365598065751709,  
      0.5530943469658123,  
      0.255707728380049,  
      0.5156471637607167,  
      0.6035959622033769,  
      0.4264196399135305,  
      0.7138186632786595,  
      0.6649192410798268],  
      [0.6635732209289072,  
      0.5886694438974678,  
      0.4177465209814143,  
      0.5980573995745231,  
      0.3194786268521958,  
      0.3468508151363199,  
      0.5533292333013828,  
      0.736855667889074,  
      0.6917056192160755,  
      0.5974072644132012],  
      [0.6955806931760296,  
      0.6779691838954662,  
      0.3267767226460304,  
      0.6260661211419981,  
      0.2760829912510313,  
      0.6188656116433753,  
      0.6139717534296958,  
      0.7025630129820909,  
      0.7210034726109186,  
      0.7083786747537733],  
      [3.0, 5.0, 8.0, 8.0, 5.0],  
      [8.0, 7.0, 8.0, 8.0, 8.0],  
      [3.0, 8.0, 7.0, 3.0, 3.0])
```

```
[9]: for i in range(8, 3, -1):  
      a549 = prepare_histogram_data('A549', i)  
      prepare_plot(a549, 'A549_RMSE', i)
```

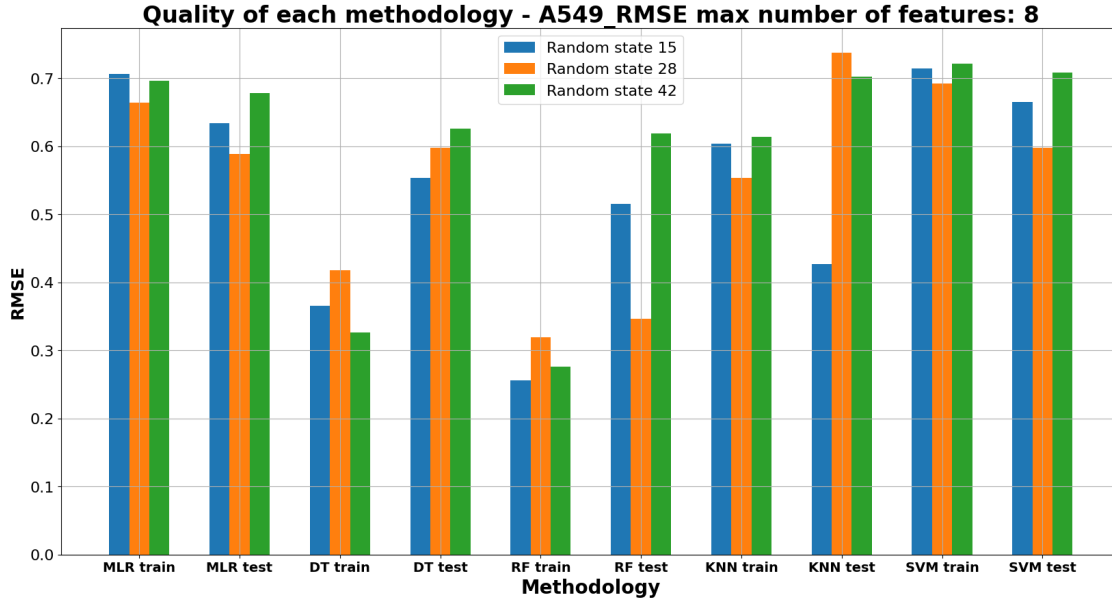

Random state - 15 ('MLR - number of features used: 3.0', 'DT - number of features used: 5.0', 'RF - number of features used: 8.0', 'KNN - number of features used: 8.0', 'SVM - number of features used: 5.0')

Random state - 28 ('MLR - number of features used: 8.0', 'DT - number of features used: 7.0', 'RF - number of features used: 8.0', 'KNN - number of features used: 8.0', 'SVM - number of features used: 8.0')

Random state - 42 ('MLR - number of features used: 3.0', 'DT - number of features used: 8.0', 'RF - number of features used: 7.0', 'KNN - number of features used: 3.0', 'SVM - number of features used: 3.0')

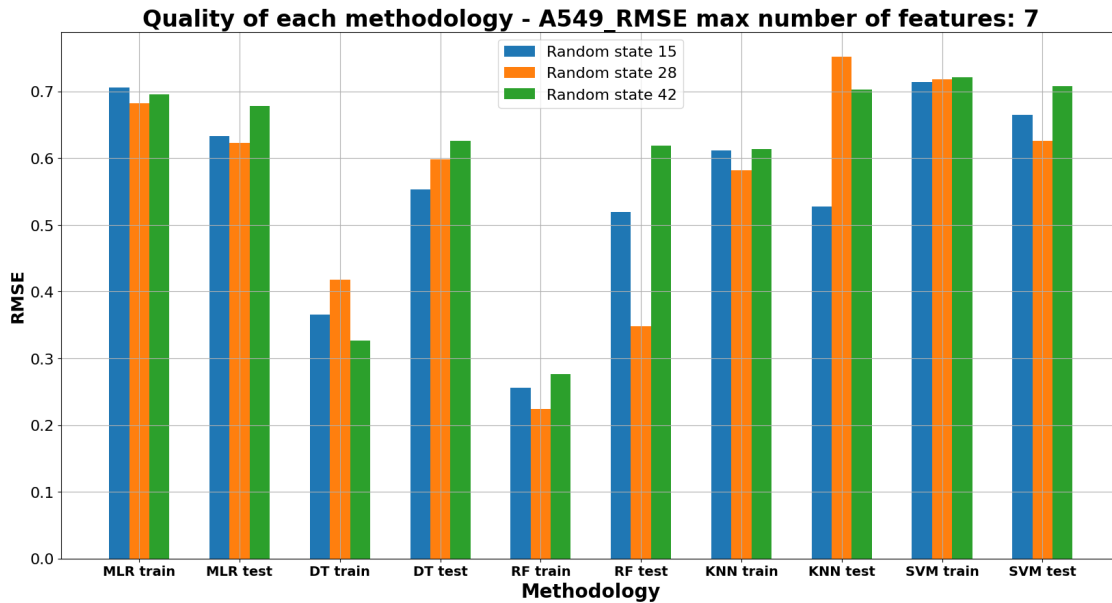

Random state - 15 ('MLR - number of features used: 3.0', 'DT - number of features used: 5.0', 'RF - number of features used: 7.0', 'KNN - number of features used: 7.0', 'SVM - number of features used: 5.0')

Random state - 28 ('MLR - number of features used: 7.0', 'DT - number of features used: 7.0', 'RF - number of features used: 7.0', 'KNN - number of features used: 7.0', 'SVM - number of features used: 7.0')

Random state - 42 ('MLR - number of features used: 3.0', 'DT - number of features used: 7.0', 'RF - number of features used: 7.0', 'KNN - number of features used: 3.0', 'SVM - number of features used: 3.0')

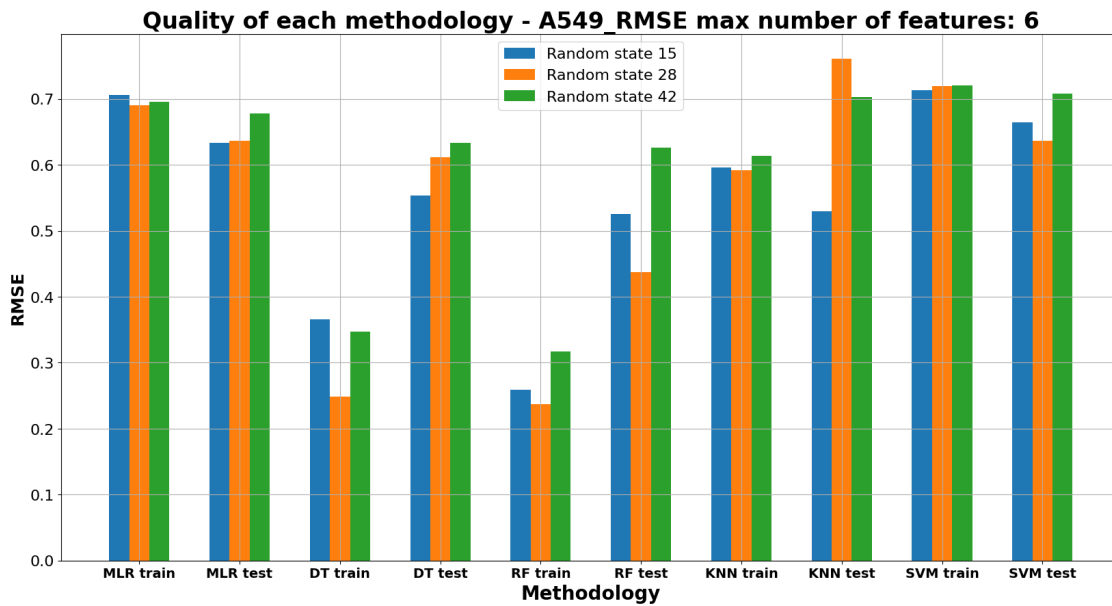

Random state - 15 ('MLR - number of features used: 3.0', 'DT - number of features used: 5.0', 'RF - number of features used: 5.0', 'KNN - number of features used: 5.0', 'SVM - number of features used: 5.0')

Random state - 28 ('MLR - number of features used: 4.0', 'DT - number of features used: 4.0', 'RF - number of features used: 5.0', 'KNN - number of features used: 5.0', 'SVM - number of features used: 5.0')

Random state - 42 ('MLR - number of features used: 3.0', 'DT - number of features used: 5.0', 'RF - number of features used: 5.0', 'KNN - number of features used: 3.0', 'SVM - number of features used: 3.0')

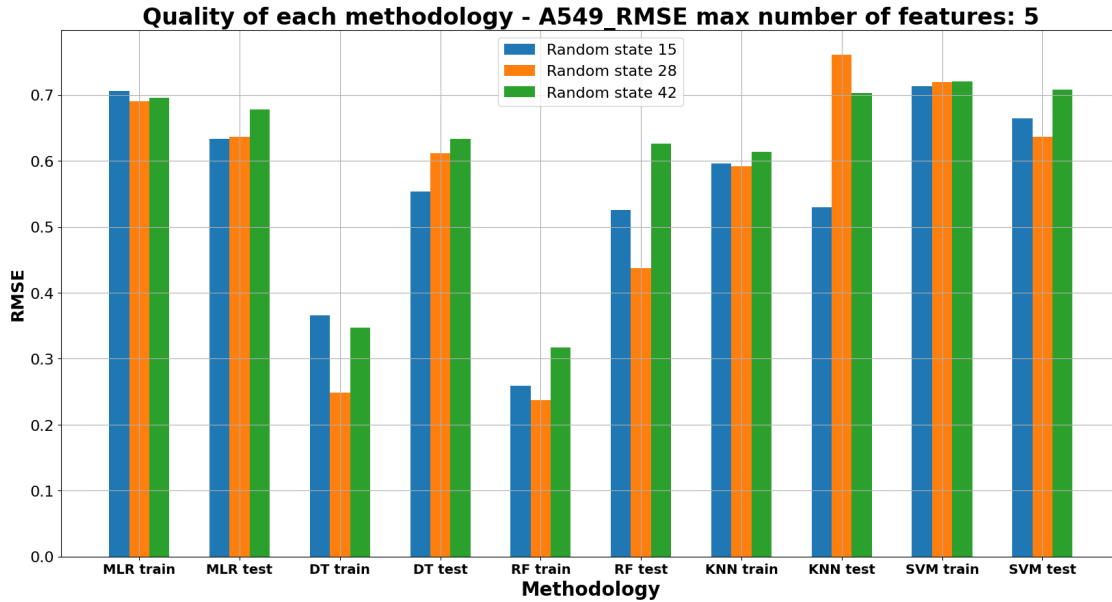

Random state - 15 ('MLR - number of features used: 3.0', 'DT - number of features used: 5.0', 'RF - number of features used: 5.0', 'KNN - number of features used: 5.0', 'SVM - number of features used: 5.0')

Random state - 28 ('MLR - number of features used: 4.0', 'DT - number of features used: 4.0', 'RF - number of features used: 5.0', 'KNN - number of features used: 5.0', 'SVM - number of features used: 5.0')

Random state - 42 ('MLR - number of features used: 3.0', 'DT - number of features used: 5.0', 'RF - number of features used: 5.0', 'KNN - number of features used: 3.0', 'SVM - number of features used: 3.0')

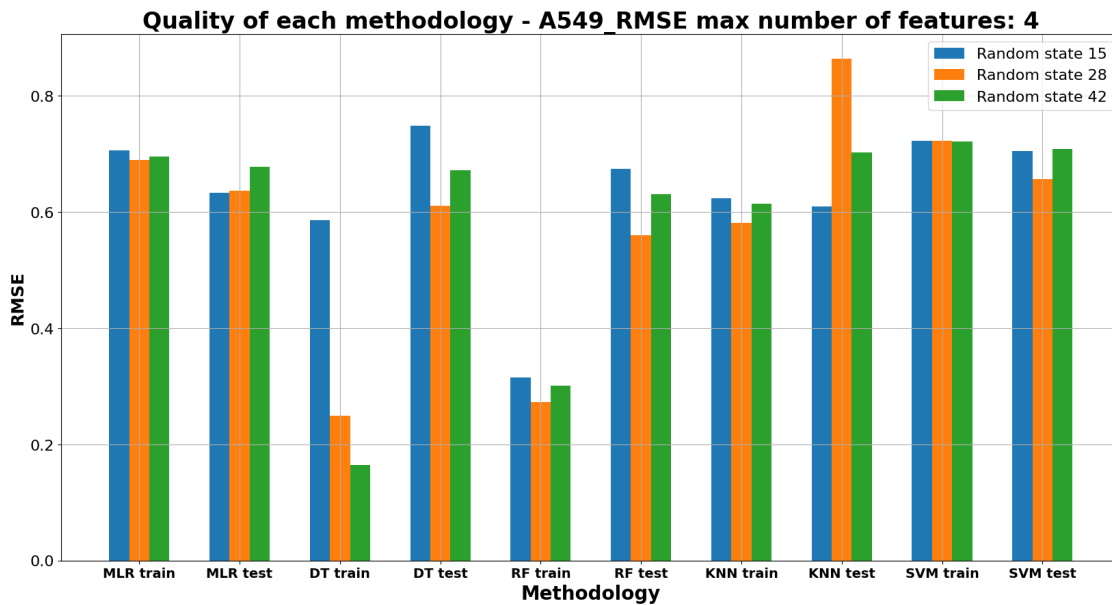

Random state - 15 ('MLR - number of features used: 3.0', 'DT - number of features used: 3.0', 'RF - number of features used: 4.0', 'KNN - number of features used: 3.0', 'SVM - number of features used: 3.0')

Random state - 28 ('MLR - number of features used: 4.0', 'DT - number of features used: 4.0', 'RF - number of features used: 4.0', 'KNN - number of features used: 4.0', 'SVM - number of features used: 4.0')

Random state - 42 ('MLR - number of features used: 3.0', 'DT - number of features used: 3.0', 'RF - number of features used: 3.0', 'KNN - number of features used: 3.0', 'SVM - number of features used: 3.0')

[ ]:

## 1.2 MCF-7

```
[10]: for i in range(8, 3, -1):
      mcf7 = prepare_histogram_data('MCF-7', i)
      prepare_plot(mcf7, 'MCF-7_RMSE', i)
```

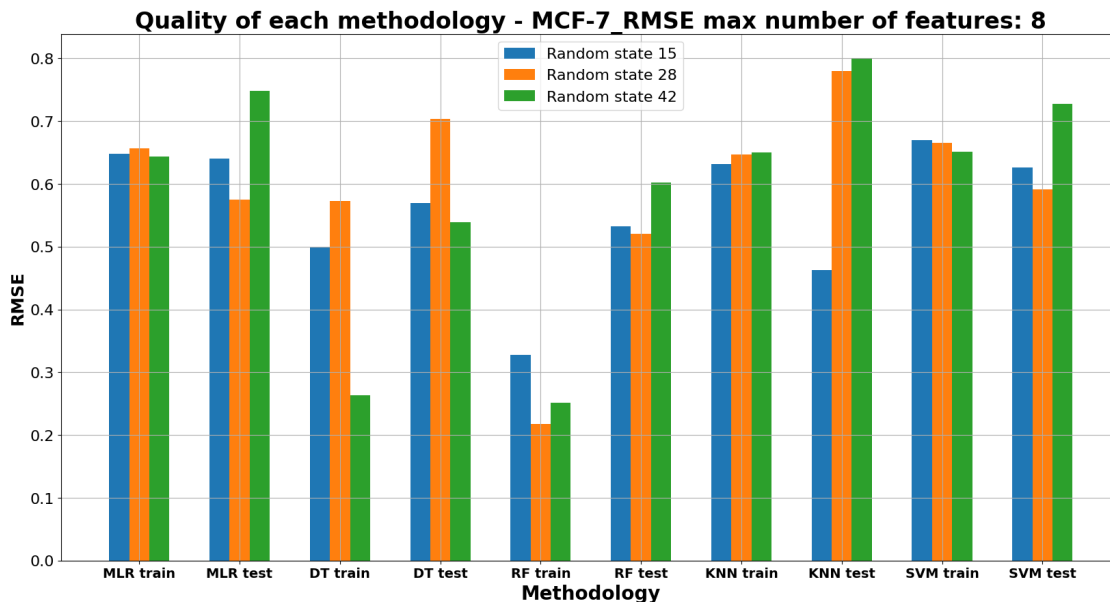

Random state - 15 ('MLR - number of features used: 8.0', 'DT - number of features used: 6.0', 'RF - number of features used: 8.0', 'KNN - number of features used: 8.0', 'SVM - number of features used: 4.0')

Random state - 28 ('MLR - number of features used: 6.0', 'DT - number of features used: 4.0', 'RF - number of features used: 8.0', 'KNN - number of features used: 6.0', 'SVM - number of features used: 8.0')

Random state - 42 ('MLR - number of features used: 4.0', 'DT - number of

features used: 8.0', 'RF - number of features used: 8.0', 'KNN - number of features used: 6.0', 'SVM - number of features used: 4.0')

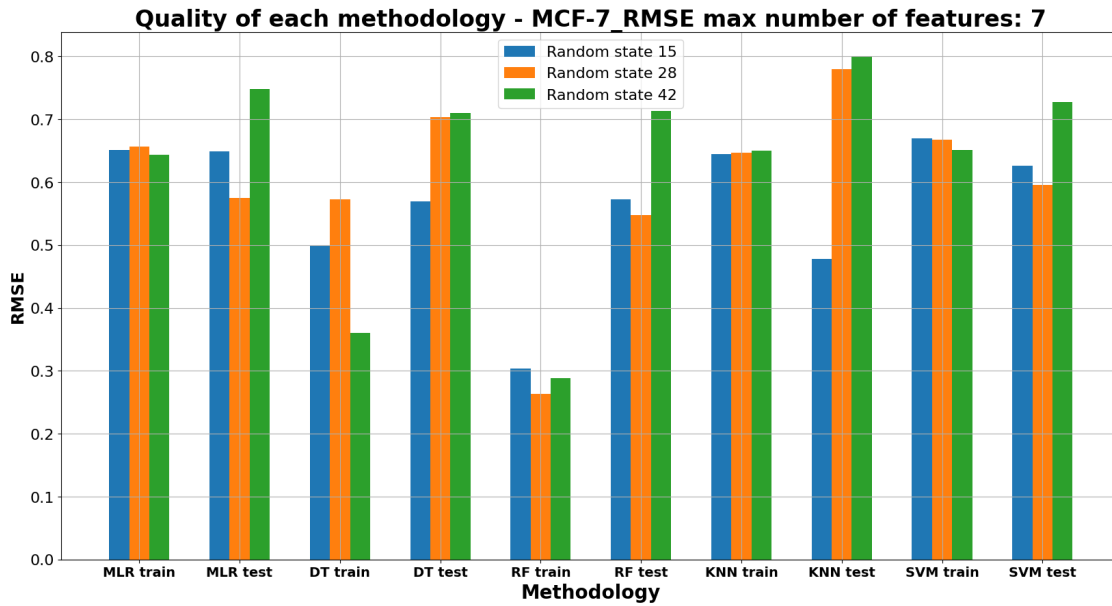

Random state - 15 ('MLR - number of features used: 6.0', 'DT - number of features used: 6.0', 'RF - number of features used: 6.0', 'KNN - number of features used: 6.0', 'SVM - number of features used: 4.0')

Random state - 28 ('MLR - number of features used: 6.0', 'DT - number of features used: 4.0', 'RF - number of features used: 6.0', 'KNN - number of features used: 6.0', 'SVM - number of features used: 6.0')

Random state - 42 ('MLR - number of features used: 4.0', 'DT - number of features used: 6.0', 'RF - number of features used: 6.0', 'KNN - number of features used: 6.0', 'SVM - number of features used: 4.0')

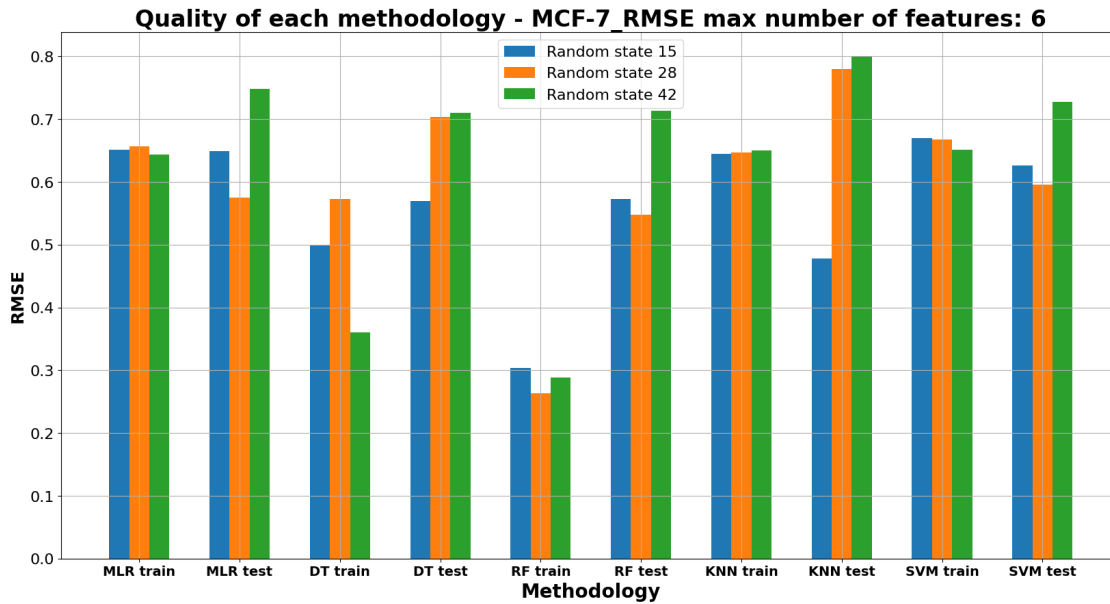

Random state - 15 ('MLR - number of features used: 6.0', 'DT - number of features used: 6.0', 'RF - number of features used: 6.0', 'KNN - number of features used: 6.0', 'SVM - number of features used: 4.0')

Random state - 28 ('MLR - number of features used: 6.0', 'DT - number of features used: 4.0', 'RF - number of features used: 6.0', 'KNN - number of features used: 6.0', 'SVM - number of features used: 6.0')

Random state - 42 ('MLR - number of features used: 4.0', 'DT - number of features used: 6.0', 'RF - number of features used: 6.0', 'KNN - number of features used: 6.0', 'SVM - number of features used: 4.0')

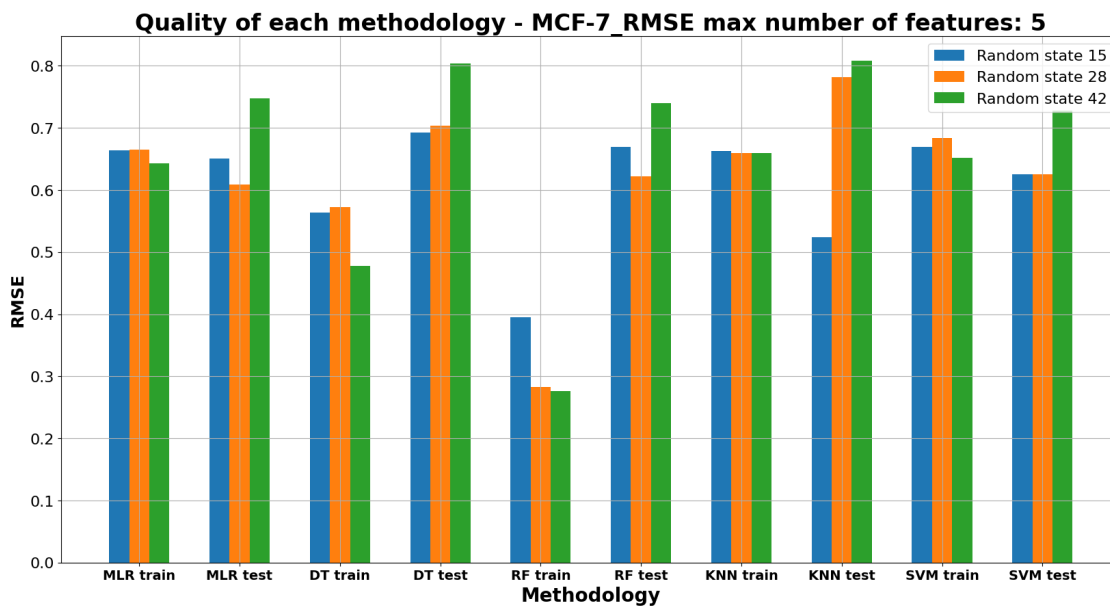



Random state - 15 ('MLR - number of features used: 4.0', 'DT - number of features used: 4.0', 'RF - number of features used: 4.0', 'KNN - number of features used: 4.0', 'SVM - number of features used: 4.0')

Random state - 28 ('MLR - number of features used: 4.0', 'DT - number of features used: 4.0', 'RF - number of features used: 4.0', 'KNN - number of features used: 4.0', 'SVM - number of features used: 4.0')

Random state - 42 ('MLR - number of features used: 4.0', 'DT - number of features used: 4.0', 'RF - number of features used: 4.0', 'KNN - number of features used: 4.0', 'SVM - number of features used: 4.0')

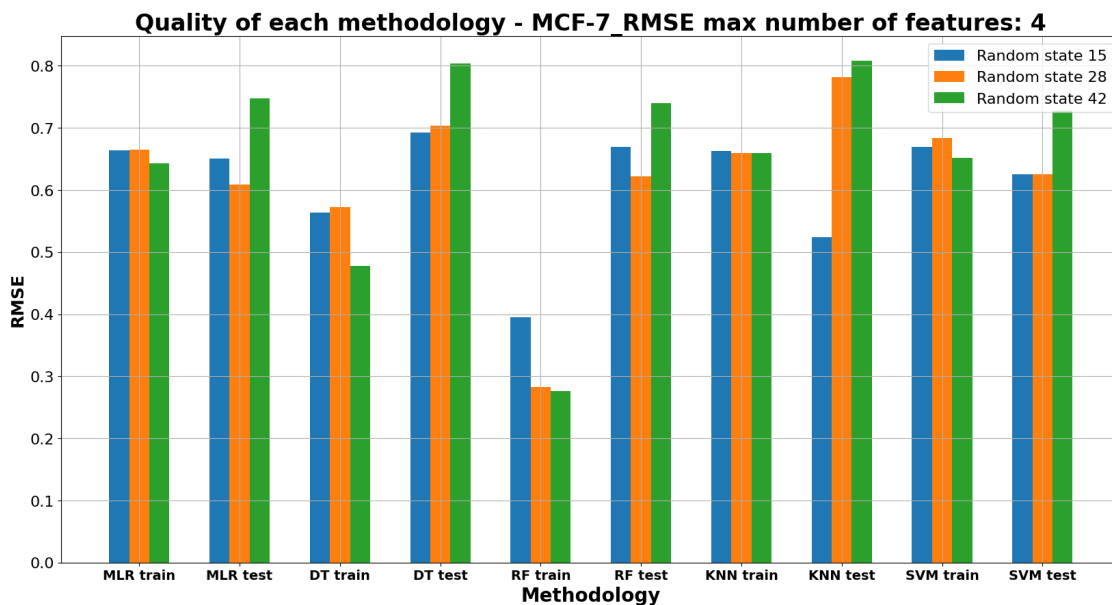

Random state - 15 ('MLR - number of features used: 4.0', 'DT - number of features used: 4.0', 'RF - number of features used: 4.0', 'KNN - number of features used: 4.0', 'SVM - number of features used: 4.0')

Random state - 28 ('MLR - number of features used: 4.0', 'DT - number of features used: 4.0', 'RF - number of features used: 4.0', 'KNN - number of features used: 4.0', 'SVM - number of features used: 4.0')

Random state - 42 ('MLR - number of features used: 4.0', 'DT - number of features used: 4.0', 'RF - number of features used: 4.0', 'KNN - number of features used: 4.0', 'SVM - number of features used: 4.0')

[ ]:

### 1.3 LoVo

```
[11]: for i in range(8, 1, -1): # 2 -> 1
      lovo = prepare_histogram_data('LoVo', i)
      prepare_plot(lovo, 'LoVo_RMSE', i)
```

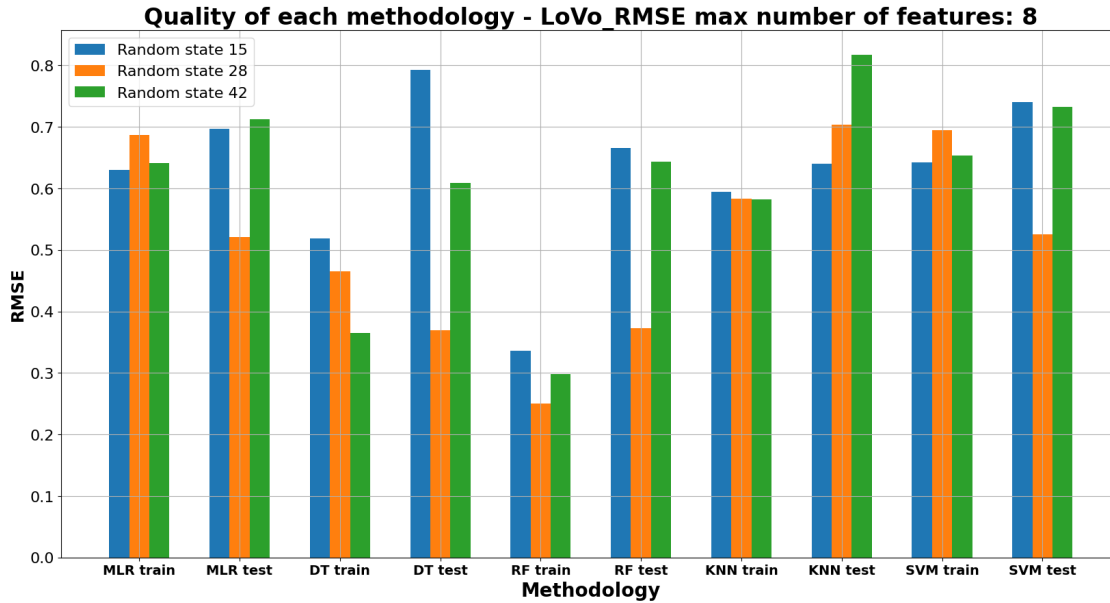

Random state - 15 ('MLR - number of features used: 6.0', 'DT - number of features used: 7.0', 'RF - number of features used: 5.0', 'KNN - number of features used: 5.0', 'SVM - number of features used: 6.0')

Random state - 28 ('MLR - number of features used: 2.0', 'DT - number of features used: 3.0', 'RF - number of features used: 7.0', 'KNN - number of features used: 7.0', 'SVM - number of features used: 2.0')

Random state - 42 ('MLR - number of features used: 3.0', 'DT - number of features used: 3.0', 'RF - number of features used: 5.0', 'KNN - number of features used: 5.0', 'SVM - number of features used: 2.0')

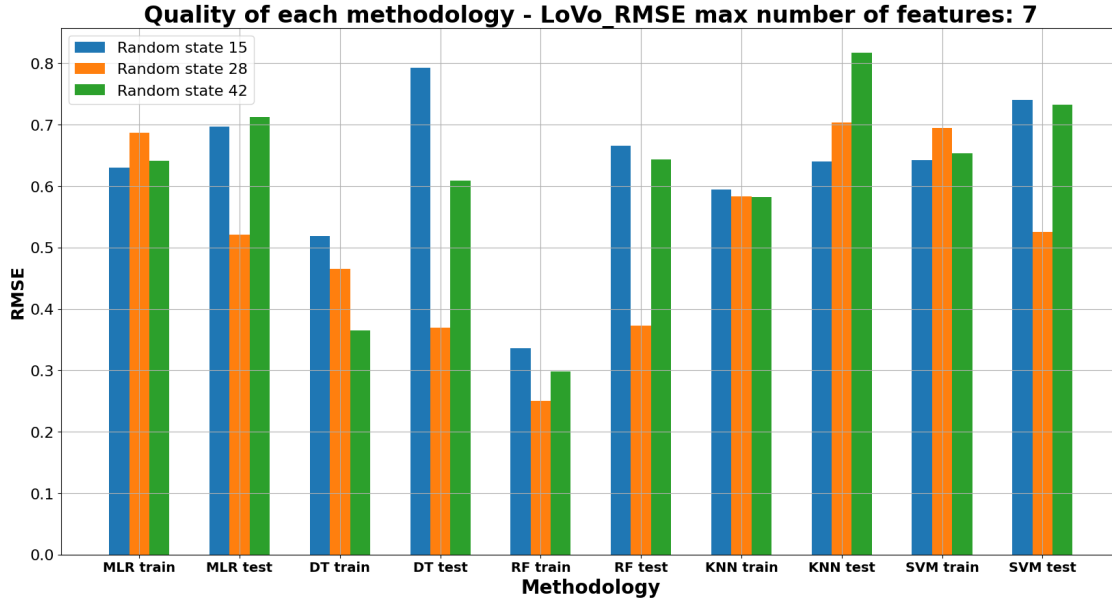

Random state - 15 ('MLR - number of features used: 6.0', 'DT - number of features used: 7.0', 'RF - number of features used: 5.0', 'KNN - number of features used: 5.0', 'SVM - number of features used: 6.0')

Random state - 28 ('MLR - number of features used: 2.0', 'DT - number of features used: 3.0', 'RF - number of features used: 7.0', 'KNN - number of features used: 7.0', 'SVM - number of features used: 2.0')

Random state - 42 ('MLR - number of features used: 3.0', 'DT - number of features used: 3.0', 'RF - number of features used: 5.0', 'KNN - number of features used: 5.0', 'SVM - number of features used: 2.0')

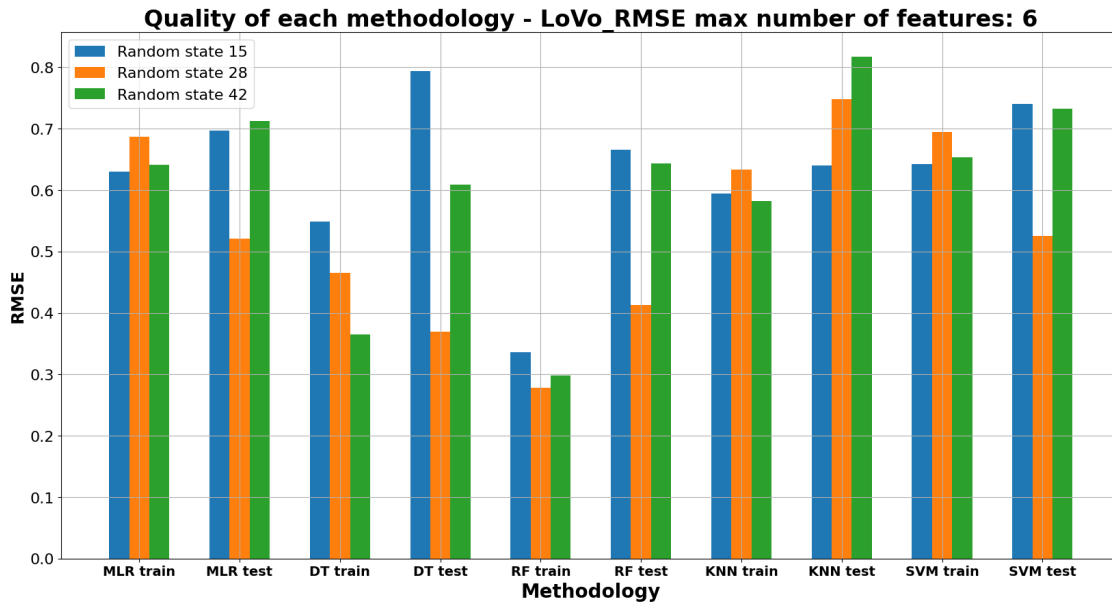

Random state - 15 ('MLR - number of features used: 6.0', 'DT - number of features used: 6.0', 'RF - number of features used: 5.0', 'KNN - number of features used: 5.0', 'SVM - number of features used: 6.0')

Random state - 28 ('MLR - number of features used: 2.0', 'DT - number of features used: 3.0', 'RF - number of features used: 6.0', 'KNN - number of features used: 2.0', 'SVM - number of features used: 2.0')

Random state - 42 ('MLR - number of features used: 3.0', 'DT - number of features used: 3.0', 'RF - number of features used: 5.0', 'KNN - number of features used: 5.0', 'SVM - number of features used: 2.0')

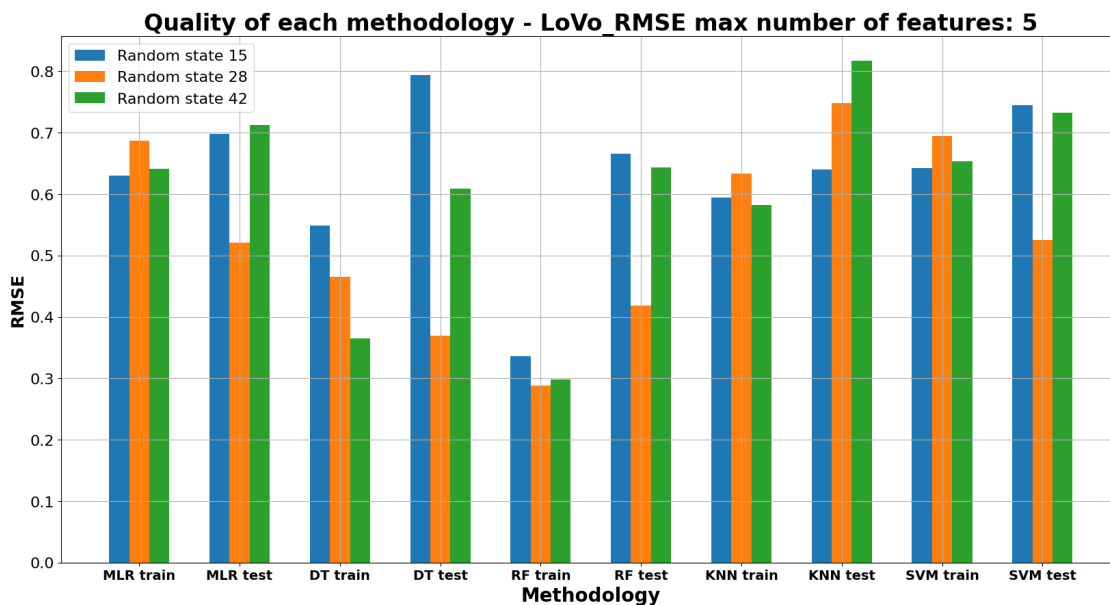

Random state - 15 ('MLR - number of features used: 5.0', 'DT - number of features used: 5.0', 'RF - number of features used: 5.0', 'KNN - number of features used: 5.0', 'SVM - number of features used: 5.0')

Random state - 28 ('MLR - number of features used: 2.0', 'DT - number of features used: 3.0', 'RF - number of features used: 5.0', 'KNN - number of features used: 2.0', 'SVM - number of features used: 2.0')

Random state - 42 ('MLR - number of features used: 3.0', 'DT - number of features used: 3.0', 'RF - number of features used: 5.0', 'KNN - number of features used: 5.0', 'SVM - number of features used: 2.0')

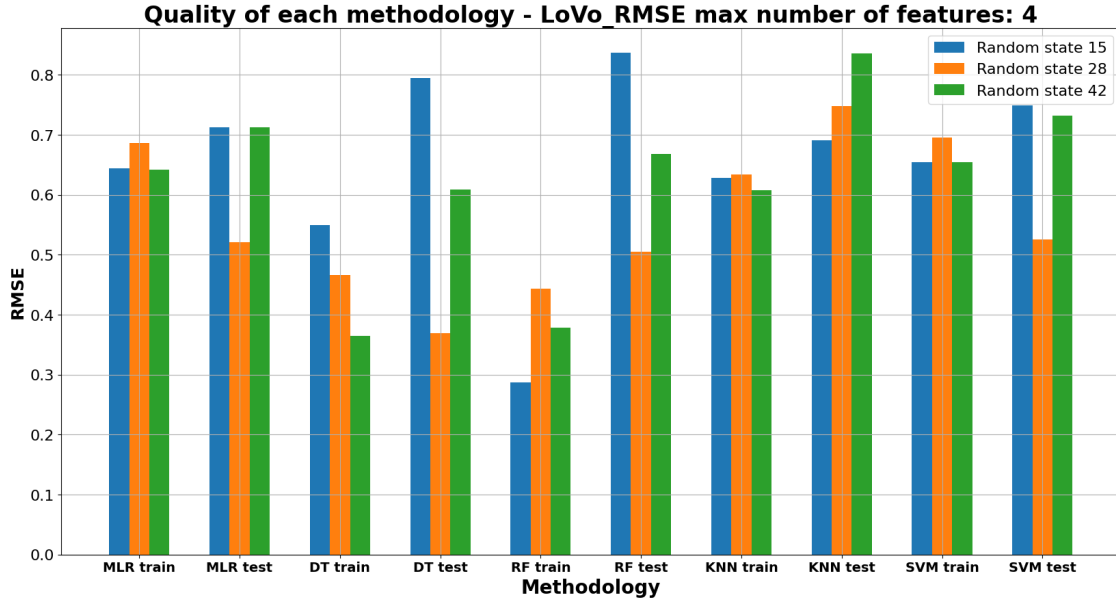

Random state - 15 ('MLR - number of features used: 3.0', 'DT - number of features used: 3.0', 'RF - number of features used: 3.0', 'KNN - number of features used: 2.0', 'SVM - number of features used: 2.0')

Random state - 28 ('MLR - number of features used: 2.0', 'DT - number of features used: 3.0', 'RF - number of features used: 2.0', 'KNN - number of features used: 2.0', 'SVM - number of features used: 2.0')

Random state - 42 ('MLR - number of features used: 3.0', 'DT - number of features used: 3.0', 'RF - number of features used: 2.0', 'KNN - number of features used: 2.0', 'SVM - number of features used: 2.0')

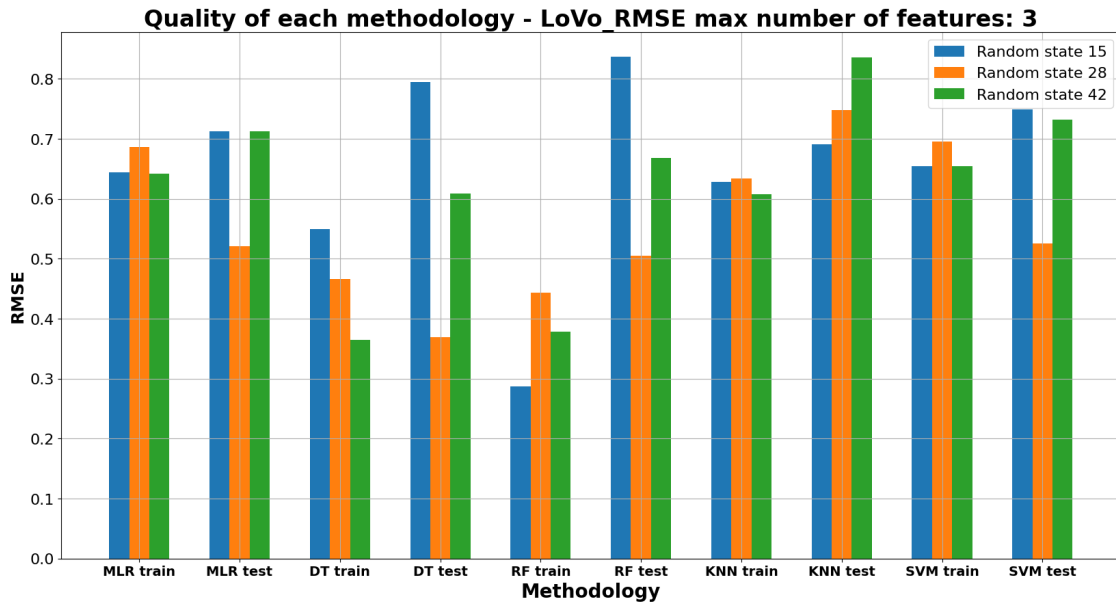

Random state - 15 ('MLR - number of features used: 3.0', 'DT - number of features used: 3.0', 'RF - number of features used: 3.0', 'KNN - number of features used: 2.0', 'SVM - number of features used: 2.0')

Random state - 28 ('MLR - number of features used: 2.0', 'DT - number of features used: 3.0', 'RF - number of features used: 2.0', 'KNN - number of features used: 2.0', 'SVM - number of features used: 2.0')

Random state - 42 ('MLR - number of features used: 3.0', 'DT - number of features used: 3.0', 'RF - number of features used: 2.0', 'KNN - number of features used: 2.0', 'SVM - number of features used: 2.0')

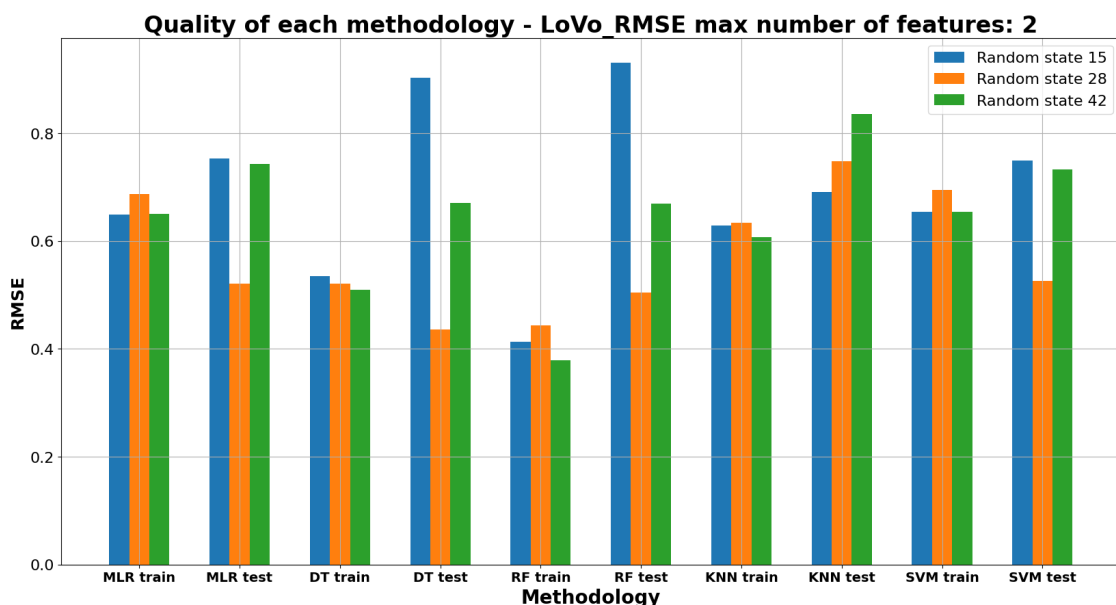

Random state - 15 ('MLR - number of features used: 2.0', 'DT - number of features used: 2.0', 'RF - number of features used: 2.0', 'KNN - number of features used: 2.0', 'SVM - number of features used: 2.0')

Random state - 28 ('MLR - number of features used: 2.0', 'DT - number of features used: 2.0', 'RF - number of features used: 2.0', 'KNN - number of features used: 2.0', 'SVM - number of features used: 2.0')

Random state - 42 ('MLR - number of features used: 2.0', 'DT - number of features used: 2.0', 'RF - number of features used: 2.0', 'KNN - number of features used: 2.0', 'SVM - number of features used: 2.0')

[ ]:

## 1.4 LoVo/DX

```
[12]: for i in range(8, 4, -1): # 5 -> 4
      lovo_dx = prepare_histogram_data('LoVo_DX', i)
      prepare_plot(lovo_dx, 'LoVo_DX_RMSE', i)
```

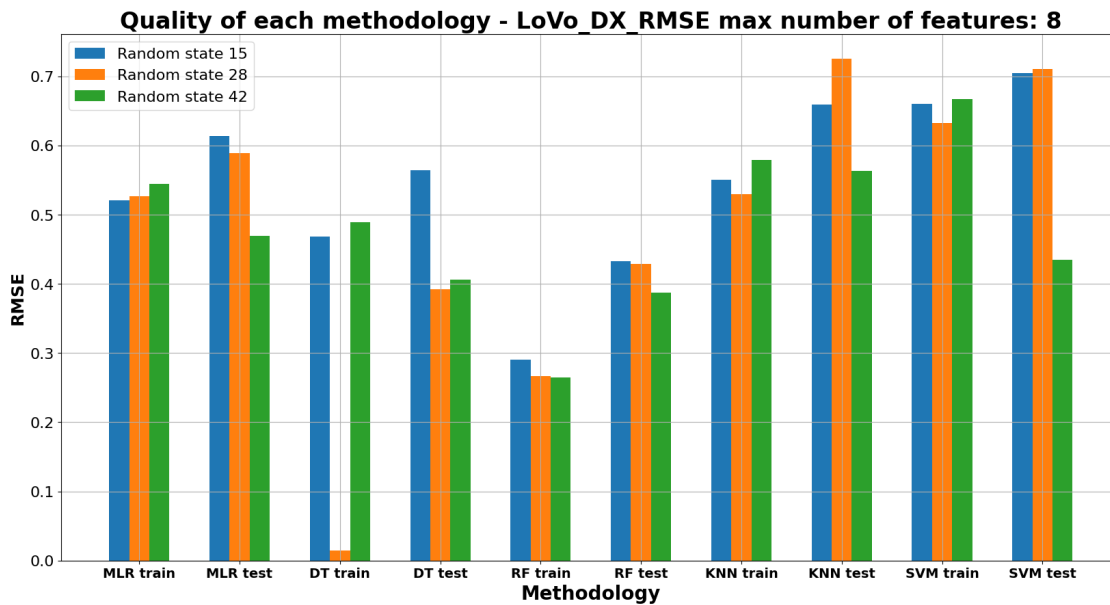

Random state - 15 ('MLR - number of features used: 8.0', 'DT - number of features used: 7.0', 'RF - number of features used: 8.0', 'KNN - number of features used: 7.0', 'SVM - number of features used: 5.0')

Random state - 28 ('MLR - number of features used: 7.0', 'DT - number of features used: 5.0', 'RF - number of features used: 8.0', 'KNN - number of features used: 8.0', 'SVM - number of features used: 8.0')

Random state - 42 ('MLR - number of features used: 8.0', 'DT - number of features used: 7.0', 'RF - number of features used: 7.0', 'KNN - number of features used: 7.0', 'SVM - number of features used: 8.0')

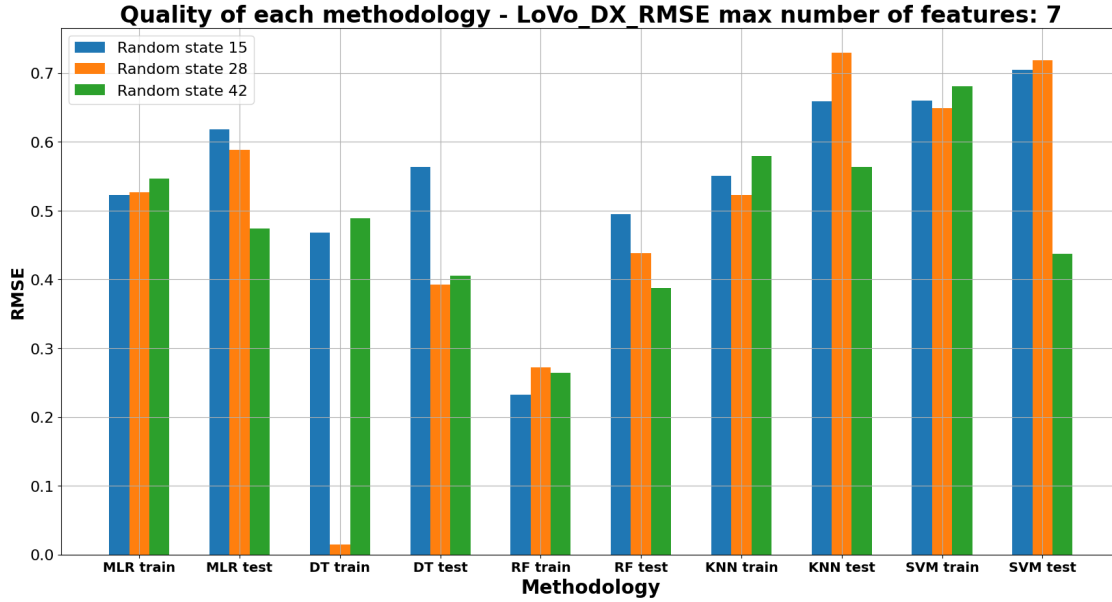

Random state - 15 ('MLR - number of features used: 7.0', 'DT - number of features used: 7.0', 'RF - number of features used: 7.0', 'KNN - number of features used: 7.0', 'SVM - number of features used: 5.0')

Random state - 28 ('MLR - number of features used: 7.0', 'DT - number of features used: 5.0', 'RF - number of features used: 7.0', 'KNN - number of features used: 7.0', 'SVM - number of features used: 5.0')

Random state - 42 ('MLR - number of features used: 7.0', 'DT - number of features used: 7.0', 'RF - number of features used: 7.0', 'KNN - number of features used: 7.0', 'SVM - number of features used: 7.0')

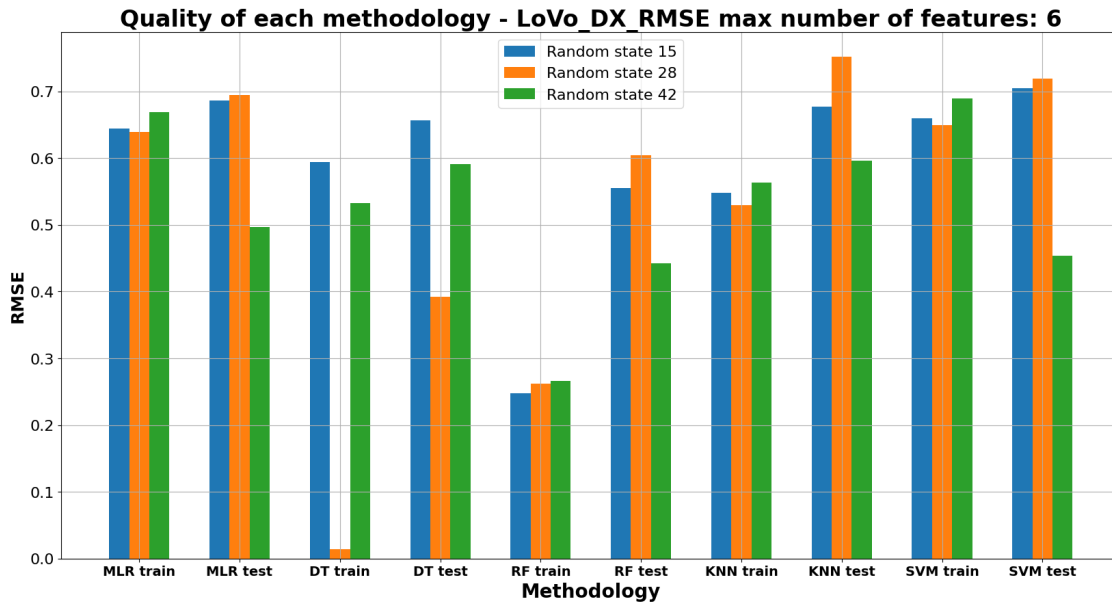



Random state - 15 ('MLR - number of features used: 5.0', 'DT - number of features used: 5.0', 'RF - number of features used: 5.0', 'KNN - number of features used: 5.0', 'SVM - number of features used: 5.0')

Random state - 28 ('MLR - number of features used: 5.0', 'DT - number of features used: 5.0', 'RF - number of features used: 5.0', 'KNN - number of features used: 5.0', 'SVM - number of features used: 5.0')

Random state - 42 ('MLR - number of features used: 5.0', 'DT - number of features used: 5.0', 'RF - number of features used: 5.0', 'KNN - number of features used: 5.0', 'SVM - number of features used: 5.0')

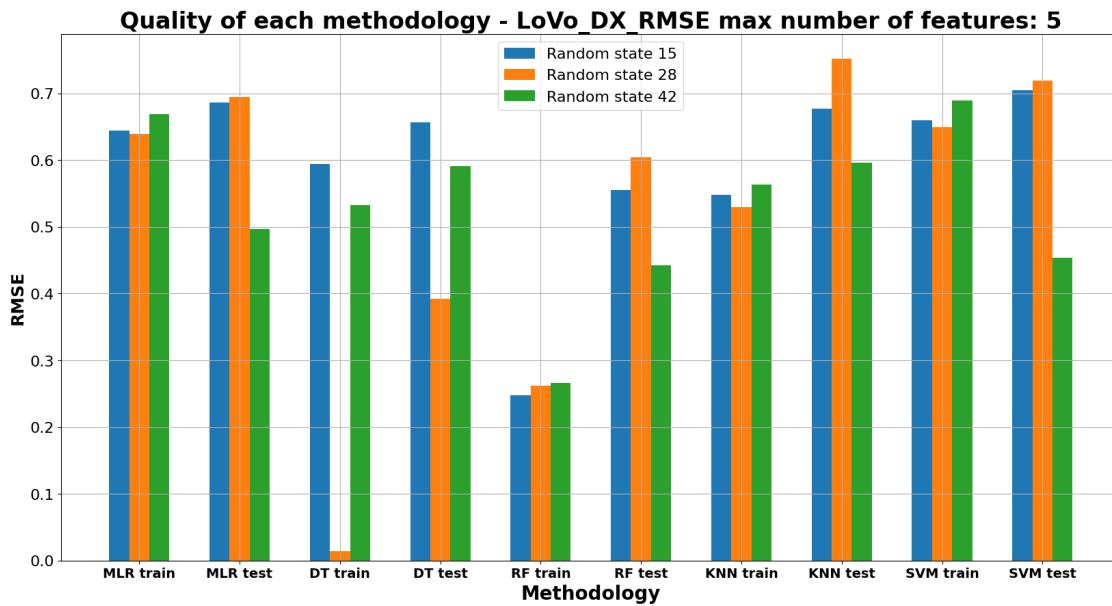

Random state - 15 ('MLR - number of features used: 5.0', 'DT - number of features used: 5.0', 'RF - number of features used: 5.0', 'KNN - number of features used: 5.0', 'SVM - number of features used: 5.0')

Random state - 28 ('MLR - number of features used: 5.0', 'DT - number of features used: 5.0', 'RF - number of features used: 5.0', 'KNN - number of features used: 5.0', 'SVM - number of features used: 5.0')

Random state - 42 ('MLR - number of features used: 5.0', 'DT - number of features used: 5.0', 'RF - number of features used: 5.0', 'KNN - number of features used: 5.0', 'SVM - number of features used: 5.0')

## 1.5 BALB/3T3

```
[13]: for i in range(8, 2, -1):  
      balb = prepare_histogram_data('BALB_3T3', i)  
      prepare_plot(balb, 'BALB_3T3_RMSE', i)
```

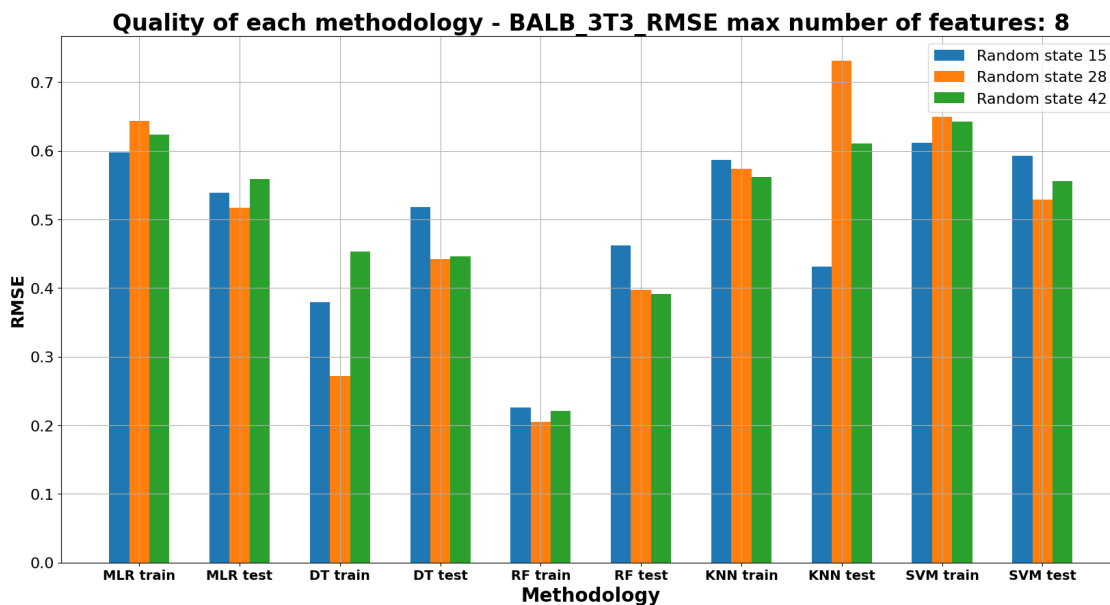

Random state - 15 ('MLR - number of features used: 7.0', 'DT - number of features used: 6.0', 'RF - number of features used: 6.0', 'KNN - number of features used: 6.0', 'SVM - number of features used: 7.0')

Random state - 28 ('MLR - number of features used: 2.0', 'DT - number of features used: 6.0', 'RF - number of features used: 7.0', 'KNN - number of features used: 3.0', 'SVM - number of features used: 2.0')

Random state - 42 ('MLR - number of features used: 3.0', 'DT - number of features used: 6.0', 'RF - number of features used: 7.0', 'KNN - number of features used: 7.0', 'SVM - number of features used: 3.0')

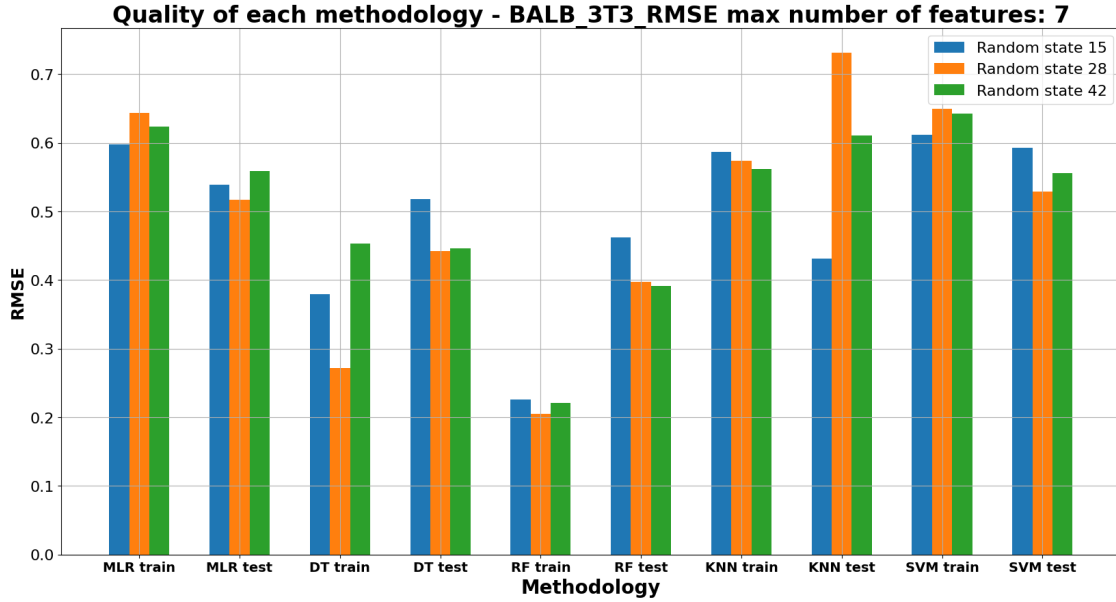

Random state - 15 ('MLR - number of features used: 7.0', 'DT - number of features used: 6.0', 'RF - number of features used: 6.0', 'KNN - number of features used: 6.0', 'SVM - number of features used: 7.0')

Random state - 28 ('MLR - number of features used: 2.0', 'DT - number of features used: 6.0', 'RF - number of features used: 7.0', 'KNN - number of features used: 3.0', 'SVM - number of features used: 2.0')

Random state - 42 ('MLR - number of features used: 3.0', 'DT - number of features used: 6.0', 'RF - number of features used: 7.0', 'KNN - number of features used: 7.0', 'SVM - number of features used: 3.0')

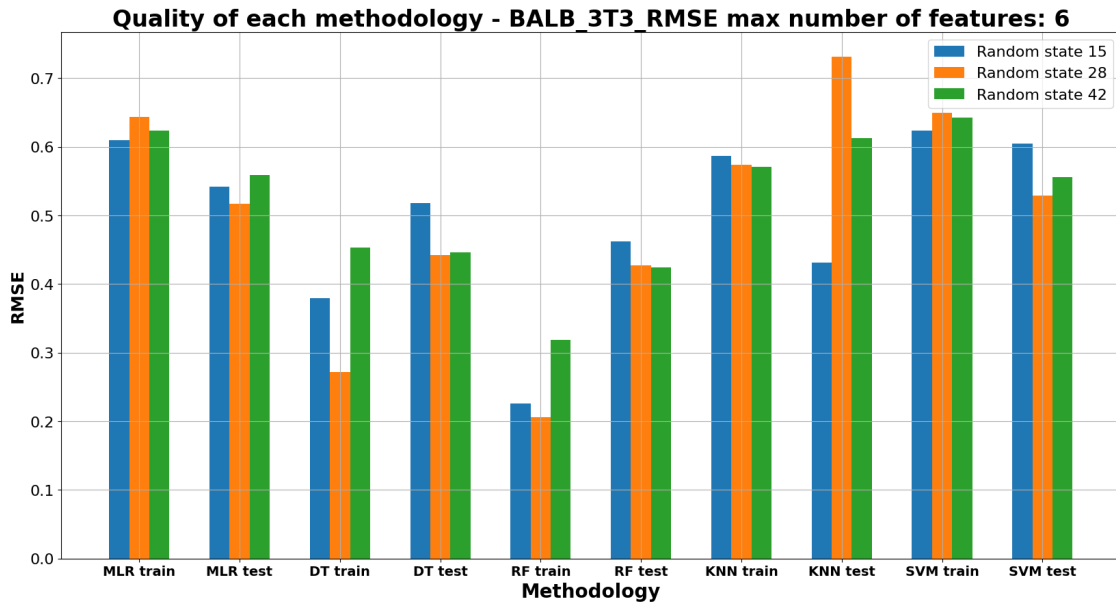

Random state - 15 ('MLR - number of features used: 6.0', 'DT - number of features used: 6.0', 'RF - number of features used: 6.0', 'KNN - number of features used: 6.0', 'SVM - number of features used: 5.0')

Random state - 28 ('MLR - number of features used: 2.0', 'DT - number of features used: 6.0', 'RF - number of features used: 6.0', 'KNN - number of features used: 3.0', 'SVM - number of features used: 2.0')

Random state - 42 ('MLR - number of features used: 3.0', 'DT - number of features used: 6.0', 'RF - number of features used: 6.0', 'KNN - number of features used: 3.0', 'SVM - number of features used: 3.0')

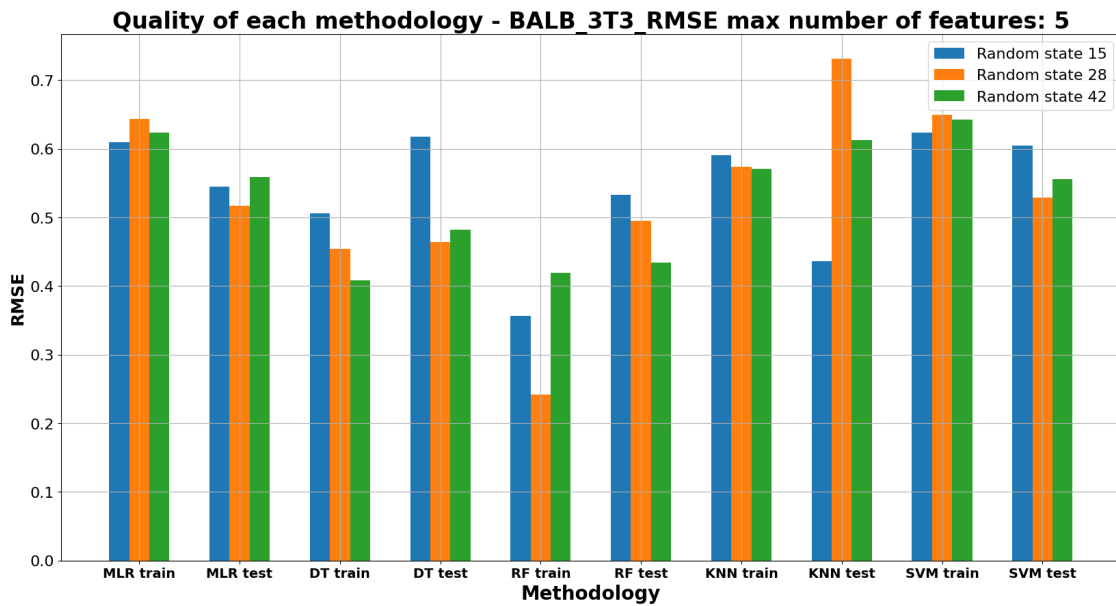

Random state - 15 ('MLR - number of features used: 5.0', 'DT - number of features used: 5.0', 'RF - number of features used: 5.0', 'KNN - number of features used: 5.0', 'SVM - number of features used: 5.0')

Random state - 28 ('MLR - number of features used: 2.0', 'DT - number of features used: 3.0', 'RF - number of features used: 5.0', 'KNN - number of features used: 3.0', 'SVM - number of features used: 2.0')

Random state - 42 ('MLR - number of features used: 3.0', 'DT - number of features used: 2.0', 'RF - number of features used: 2.0', 'KNN - number of features used: 3.0', 'SVM - number of features used: 3.0')

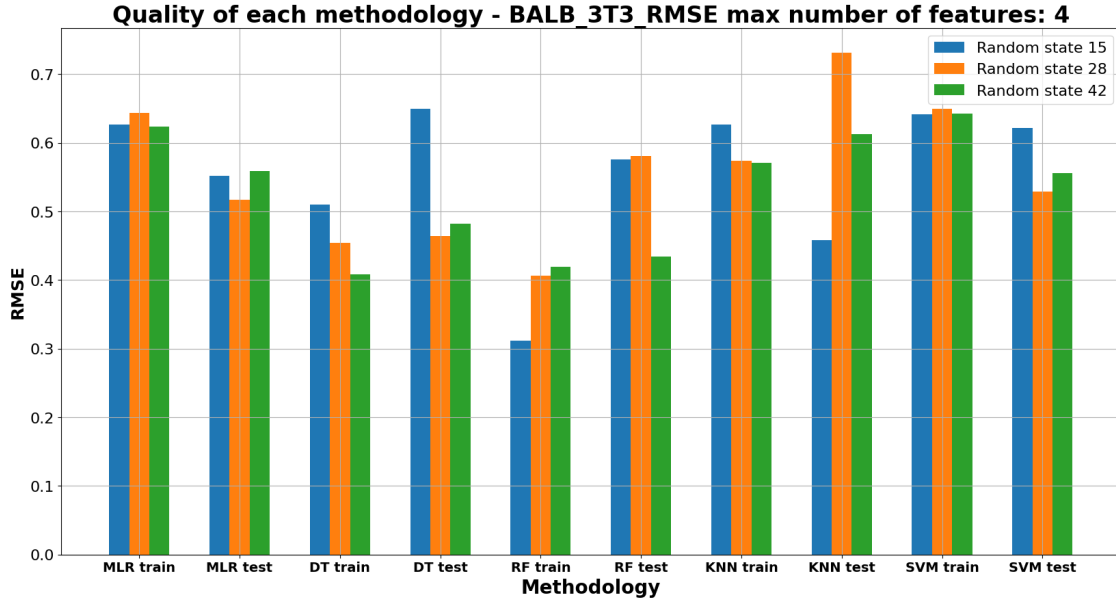

Random state - 15 ('MLR - number of features used: 3.0', 'DT - number of features used: 3.0', 'RF - number of features used: 3.0', 'KNN - number of features used: 2.0', 'SVM - number of features used: 3.0')

Random state - 28 ('MLR - number of features used: 2.0', 'DT - number of features used: 3.0', 'RF - number of features used: 2.0', 'KNN - number of features used: 3.0', 'SVM - number of features used: 2.0')

Random state - 42 ('MLR - number of features used: 3.0', 'DT - number of features used: 2.0', 'RF - number of features used: 2.0', 'KNN - number of features used: 3.0', 'SVM - number of features used: 3.0')

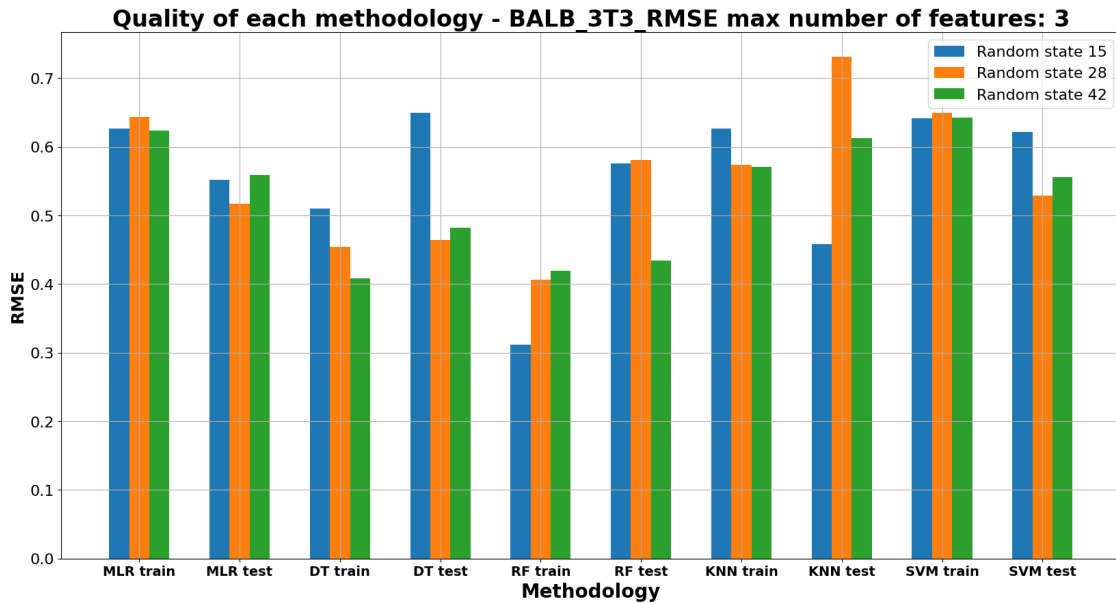

```

Random state - 15 ('MLR - number of features used: 3.0', 'DT - number of
features used: 3.0', 'RF - number of features used: 3.0', 'KNN - number of
features used: 2.0', 'SVM - number of features used: 3.0')
Random state - 28 ('MLR - number of features used: 2.0', 'DT - number of
features used: 3.0', 'RF - number of features used: 2.0', 'KNN - number of
features used: 3.0', 'SVM - number of features used: 2.0')
Random state - 42 ('MLR - number of features used: 3.0', 'DT - number of
features used: 2.0', 'RF - number of features used: 2.0', 'KNN - number of
features used: 3.0', 'SVM - number of features used: 3.0')

```

```
[ ]:
```

```
[ ]:
```

## 1.6 Best models selection

```

[14]: def prepare_best_plot(target_name, max_number_of_features):

    excel_files = []

    for name in glob.glob('../Data/Quality_'+str(target_name)+'*'):
        excel_files.append(name)

    random_state_15 = []
    random_state_28 = []
    random_state_42 = []
    features_15 = []
    features_28 = []
    features_42 = []
    random_states = [15, 28, 42]

    for random_state in range(len(random_states)):
        tmp = []
        to_plot = []
        values = []
        number_of_features = []
        for sheet in sheet_names:
            tmp.append(pd.read_excel(excel_files[random_state],
↪sheet_name=sheet))
            for data in tmp:
                temp = data[data['Number of features'] <= max_number_of_features]
                to_plot.append(temp[temp['Test data R^2 score'] == max(temp['Test_
↪data R^2 score'])])
            for value in to_plot:
                values.append(value['Training data R^2 score'].tail(1))

```

```

        values.append(value['Test data R^2 score'].tail(1))
        number_of_features.append(value['Number of features'].tail(1))
    for element in values:
        if random_state == 0:
            random_state_15.append(float(element))
        elif random_state == 1:
            random_state_28.append(float(element))
        elif random_state == 2:
            random_state_42.append(float(element))
        else:
            print("Error with conditions...")

    for features in number_of_features:
        if random_state == 0:
            features_15.append(float(features))
        elif random_state == 1:
            features_28.append(float(features))
        elif random_state == 2:
            features_42.append(float(features))
        else:
            print("Error with conditions...")

    return random_state_15, random_state_28, random_state_42, features_15, \
    features_28, features_42

```

```

[15]: def prepare_plot(data, name, max_number_of_features):
    fig = plt.figure(figsize=(20,10))
    X = x_ticks
    y_15 = handle_negative_corr(data[0])
    y_28 = handle_negative_corr(data[1])
    y_42 = handle_negative_corr(data[2])

    X_axis = np.arange(len(X))
    y_ax = [x/100 for x in range(0, 105, 5)]
    plt.yticks(y_ax)
    plt.bar(X_axis - 0.2, y_15, 0.2, label = 'Random state 15')
    plt.bar(X_axis + 0.0, y_28, 0.2, label = 'Random state 28')
    plt.bar(X_axis + 0.2, y_42, 0.2, label = 'Random state 42')
    #plt.plot(X_axis, y_15, color='r', label='Random state 15')
    #plt.plot(X_axis, y_28, color='g', label='Random state 28')
    #plt.plot(X_axis, y_42, color='b', label='Random state 42')

    plt.xticks(X_axis, X)
    plt.xlabel("Methodology", fontsize=20, weight='bold')
    plt.ylabel("Correlation coefficient", fontsize=18, weight='bold')
    plt.ylim([0.0, 1.0])

```

```

plt.title("Quality of each methodology - "+str(name)+' '+str('max number of_
↪features: '+str(max_number_of_features)), fontsize=24, weight='bold')
plt.grid(visible=True)
plt.legend()
plt.show()
for i, state in enumerate(random_states):
    print('Random state - '+str(state)+'_
↪'+str(update_description(sheet_names, data[i+3])))

```

```

[16]: def update_description(x_axis_labels, number_of_features):

    DT = str(x_axis_labels[0])+' - number of features used:_
↪'+str(number_of_features[0])
    RF = str(x_axis_labels[1])+' - number of features used:_
↪'+str(number_of_features[1])

    return DT, RF

```

```
[ ]:
```

### 1.6.1 A549

```
[17]: sheet_names = ['DT', 'RF']
```

```
[18]: x_ticks = ['DT train R', 'DT test R', 'RF train R', 'RF test R']
```

```

[19]: for i in range(8, 3, -1):
    a549 = prepare_best_plot('A549', i)
    prepare_plot(a549, 'A549', i)
    print(handle_negative_corr(a549[0]))
    print(handle_negative_corr(a549[1]))
    print(handle_negative_corr(a549[2]))

```



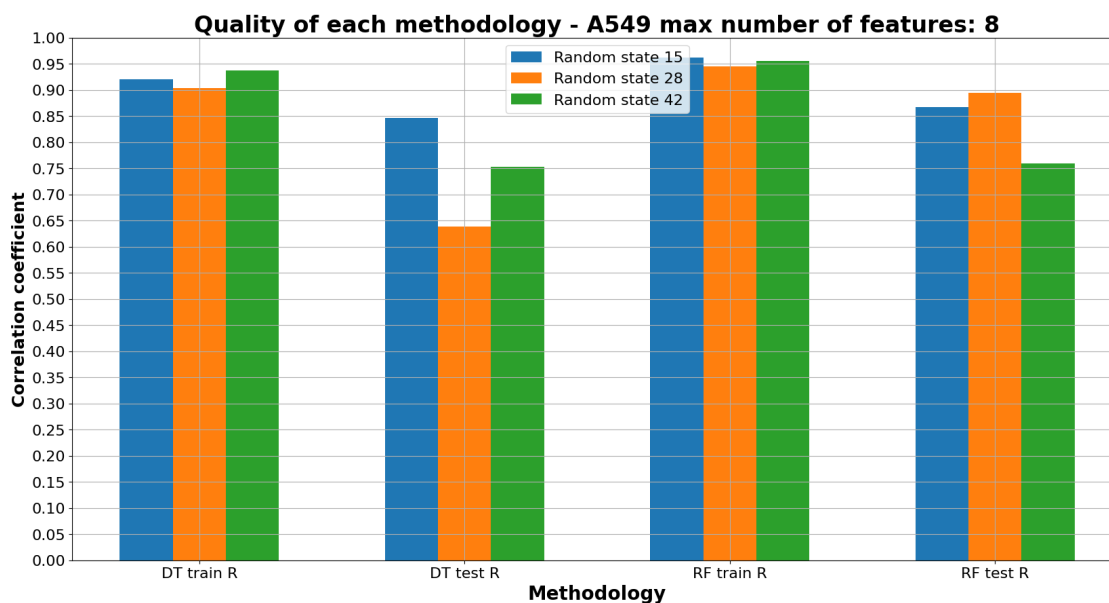

Random state - 15 ('DT - number of features used: 5.0', 'RF - number of features used: 8.0')

Random state - 28 ('DT - number of features used: 7.0', 'RF - number of features used: 8.0')

Random state - 42 ('DT - number of features used: 8.0', 'RF - number of features used: 7.0')

[0.9201268576746804, 0.8457608041331407, 0.9617557913430392, 0.8674998324838339]

[0.9039251218762473, 0.6385038801226338, 0.9449953932266721, 0.8948585348179655]

[0.9379105079400218, 0.7530696887427908, 0.9560924167894731, 0.7596144482170636]

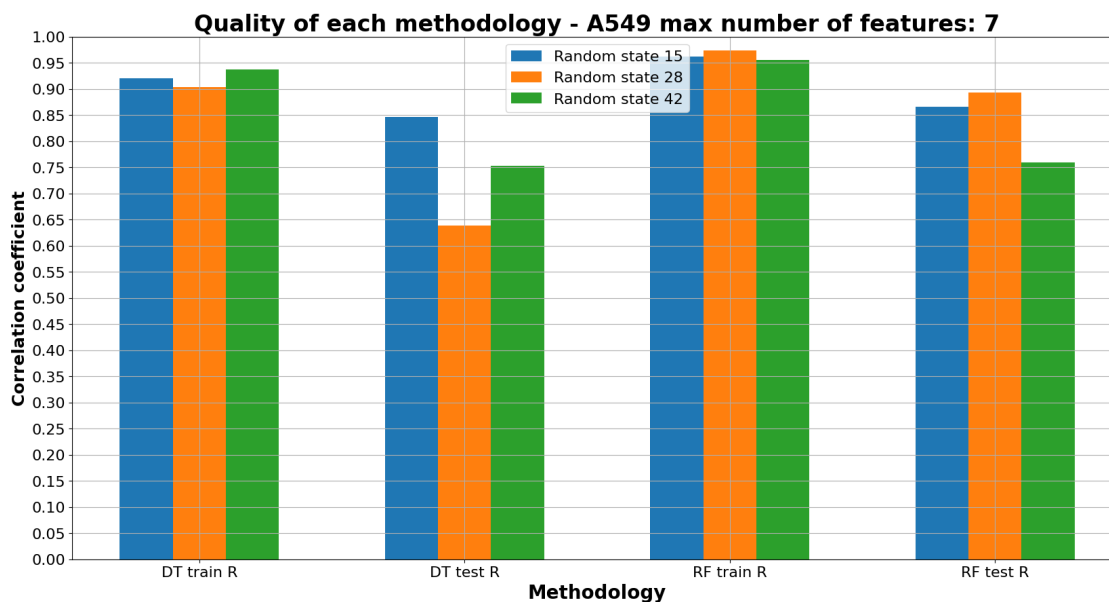

Random state - 15 ('DT - number of features used: 5.0', 'RF - number of features used: 7.0')

Random state - 28 ('DT - number of features used: 7.0', 'RF - number of features used: 7.0')

Random state - 42 ('DT - number of features used: 7.0', 'RF - number of features used: 7.0')

[0.9201268576746804, 0.8457608041331407, 0.9617502720280803, 0.865633475359066]

[0.9039251218762473, 0.6385038801226338, 0.9733717517208741, 0.8936683566006186]

[0.9379105079400218, 0.7530696887427905, 0.9560924167894731, 0.7596144482170636]

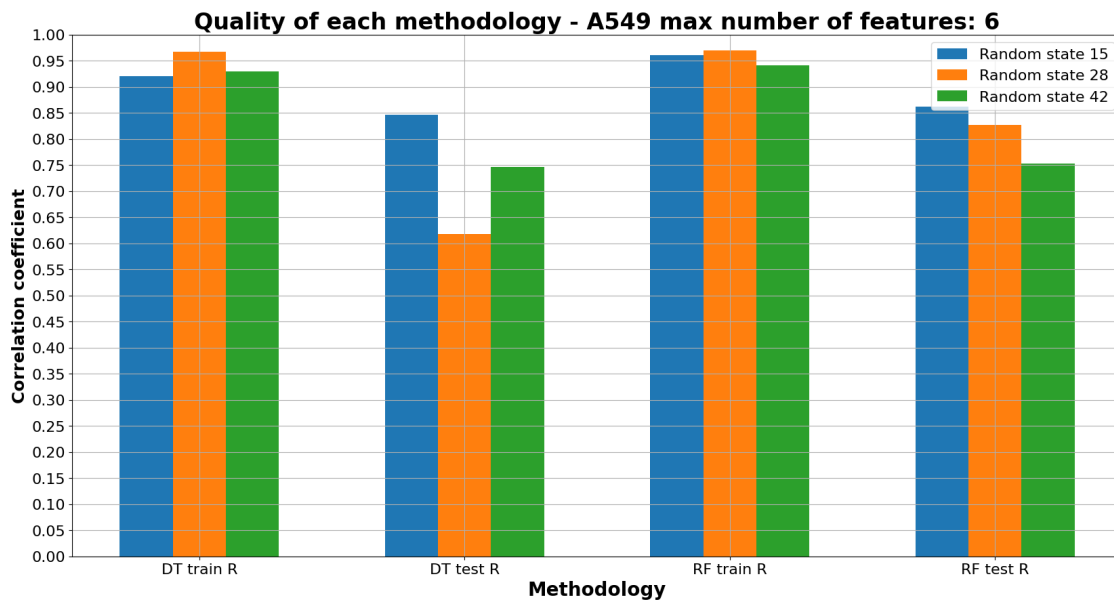

Random state - 15 ('DT - number of features used: 5.0', 'RF - number of features used: 5.0')

Random state - 28 ('DT - number of features used: 4.0', 'RF - number of features used: 5.0')

Random state - 42 ('DT - number of features used: 5.0', 'RF - number of features used: 5.0')

[0.9201268576746804, 0.8457608041331407, 0.960591935079034, 0.8620618597285548]

[0.9669220010492233, 0.6172800607391895, 0.9701820261061275, 0.8267270635721486]

[0.9298029234842533, 0.746434872641246, 0.9417342321043257, 0.7526447589514621]

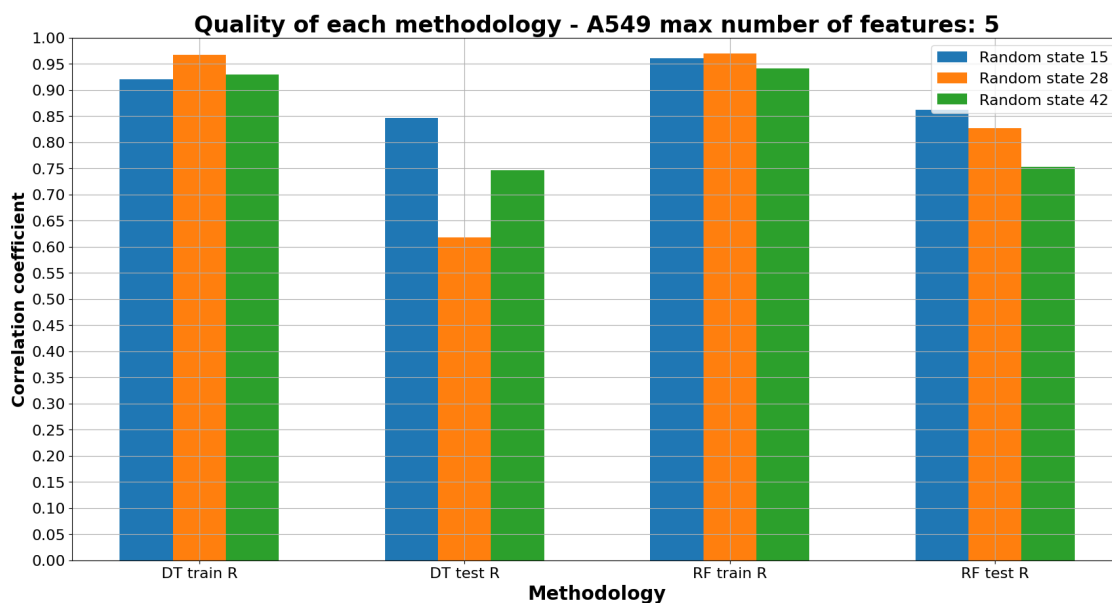

Random state - 15 ('DT - number of features used: 5.0', 'RF - number of features used: 5.0')

Random state - 28 ('DT - number of features used: 4.0', 'RF - number of features used: 5.0')

Random state - 42 ('DT - number of features used: 5.0', 'RF - number of features used: 5.0')

[0.9201268576746804, 0.8457608041331407, 0.960591935079034, 0.8620618597285548]

[0.9669220010492233, 0.6172800607391895, 0.9701820261061275, 0.8267270635721486]

[0.9298029234842533, 0.746434872641246, 0.9417342321043257, 0.7526447589514621]

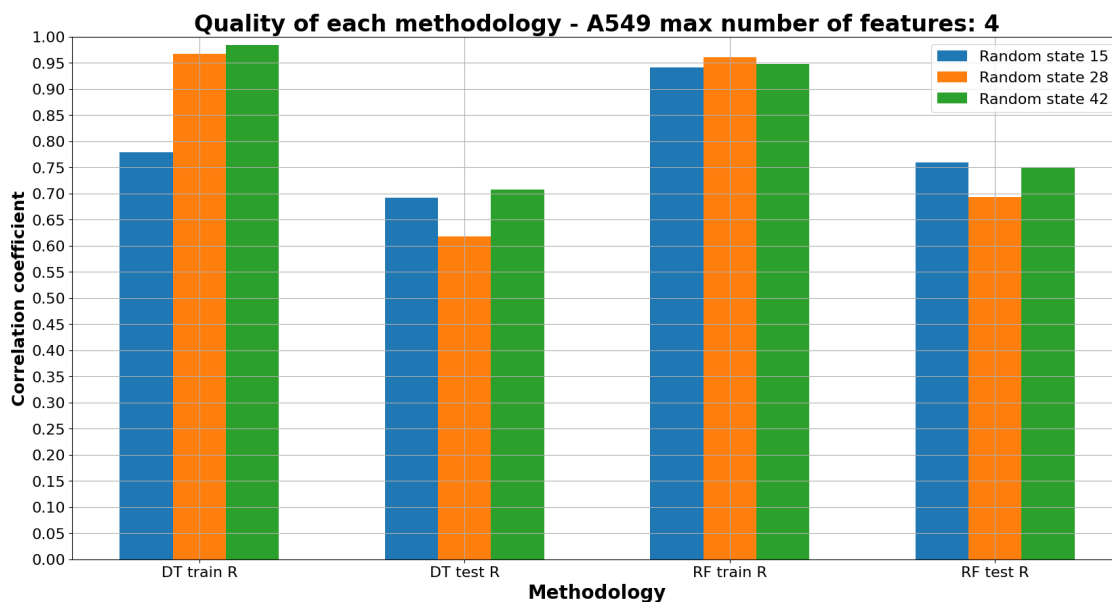

```

Random state - 15 ('DT - number of features used: 3.0', 'RF - number of features
used: 4.0')
Random state - 28 ('DT - number of features used: 4.0', 'RF - number of features
used: 4.0')
Random state - 42 ('DT - number of features used: 3.0', 'RF - number of features
used: 3.0')
[0.7787561234847591, 0.6915475851498438, 0.94133348297971, 0.7594733568417315]
[0.9669220010492233, 0.6172800607391895, 0.9601878273802564, 0.6926815941771752]
[0.9846195227501177, 0.70753906802074, 0.9477169502251152, 0.7487968593395388]

```

```
[ ]:
```

```

[20]: for i in range(8, 2, -1):
      x = prepare_best_plot('BALB_3T3', i)
      prepare_plot(x, 'BALB_3T3', i)
      print(handle_negative_corr(x[0]))
      print(handle_negative_corr(x[1]))
      print(handle_negative_corr(x[2]))

```

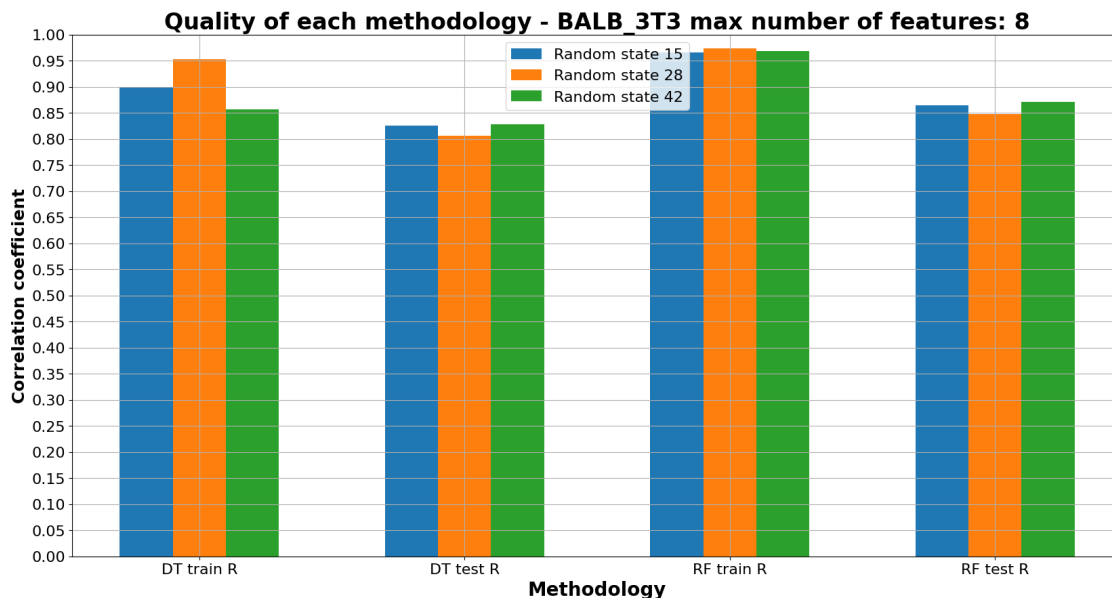

```

Random state - 15 ('DT - number of features used: 6.0', 'RF - number of features
used: 6.0')
Random state - 28 ('DT - number of features used: 6.0', 'RF - number of features
used: 7.0')
Random state - 42 ('DT - number of features used: 6.0', 'RF - number of features
used: 7.0')
[0.8991491467263336, 0.8261911693918914, 0.9656538230216772, 0.8642992780332693]
[0.9528404289708712, 0.8063470063121128, 0.9733753371944485, 0.8472660678286129]

```

[0.8574233855704518, 0.8283658235151035, 0.9679324070733115, 0.8709265604132982]

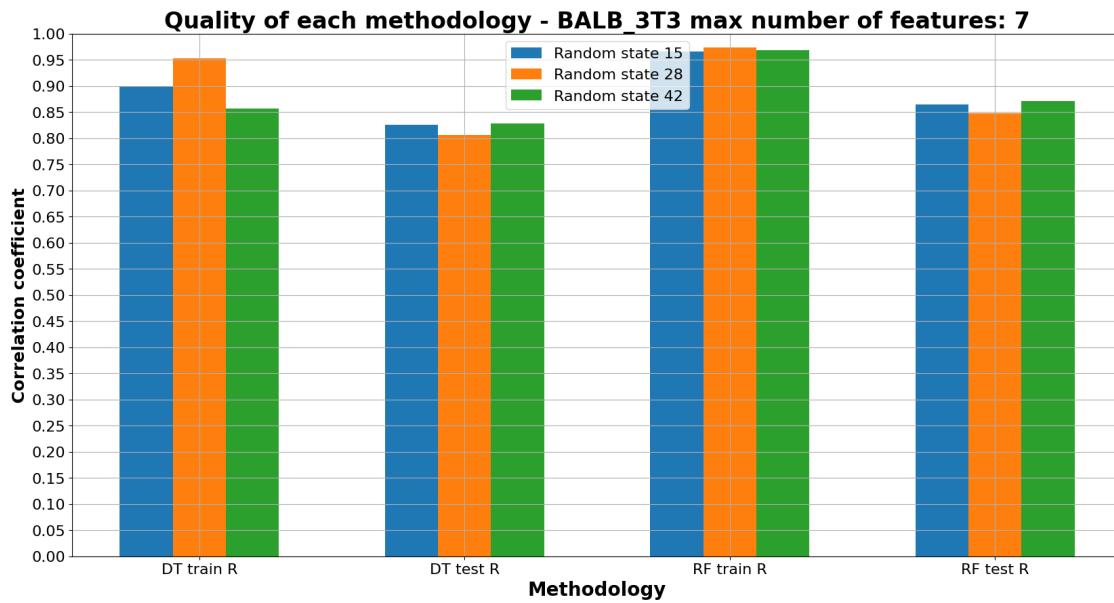

Random state - 15 ('DT - number of features used: 6.0', 'RF - number of features used: 6.0')

Random state - 28 ('DT - number of features used: 6.0', 'RF - number of features used: 7.0')

Random state - 42 ('DT - number of features used: 6.0', 'RF - number of features used: 7.0')

[0.8991491467263336, 0.8261911693918914, 0.9656538230216772, 0.8642992780332693]

[0.9528404289708712, 0.8063470063121128, 0.9733753371944485, 0.8472660678286129]

[0.8574233855704518, 0.8283658235151035, 0.9679324070733115, 0.8709265604132982]

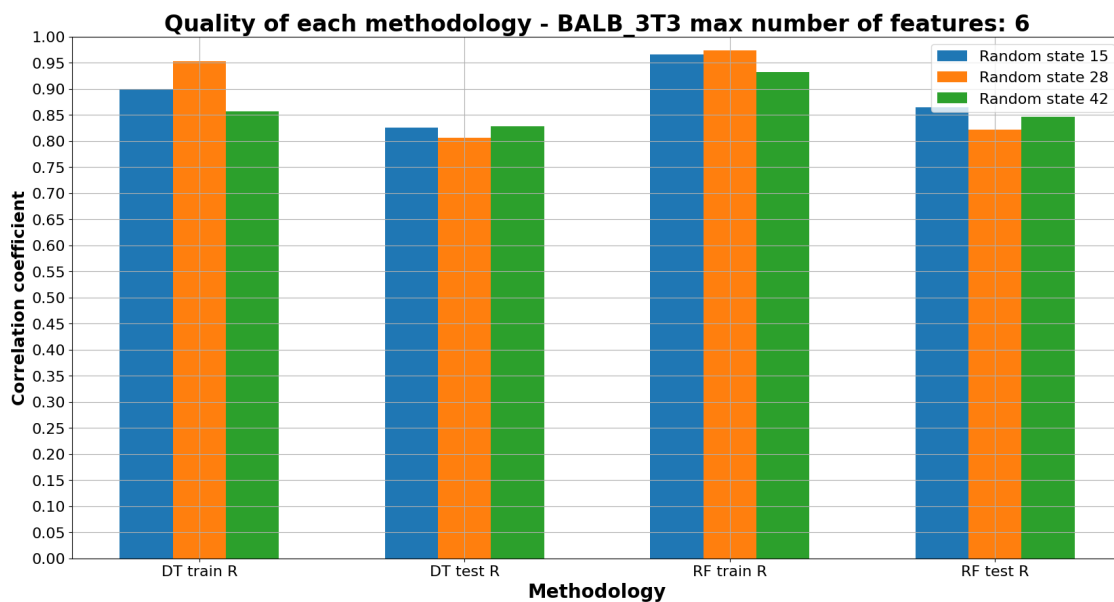

Random state - 15 ('DT - number of features used: 6.0', 'RF - number of features used: 6.0')

Random state - 28 ('DT - number of features used: 6.0', 'RF - number of features used: 6.0')

Random state - 42 ('DT - number of features used: 6.0', 'RF - number of features used: 6.0')

[0.8991491467263336, 0.8261911693918914, 0.9656538230216772, 0.8642992780332693]

[0.9528404289708712, 0.8063470063121128, 0.9732431671159815, 0.8213095110427073]

[0.8574233855704518, 0.8283658235151035, 0.9323265067533627, 0.8462778707935902]

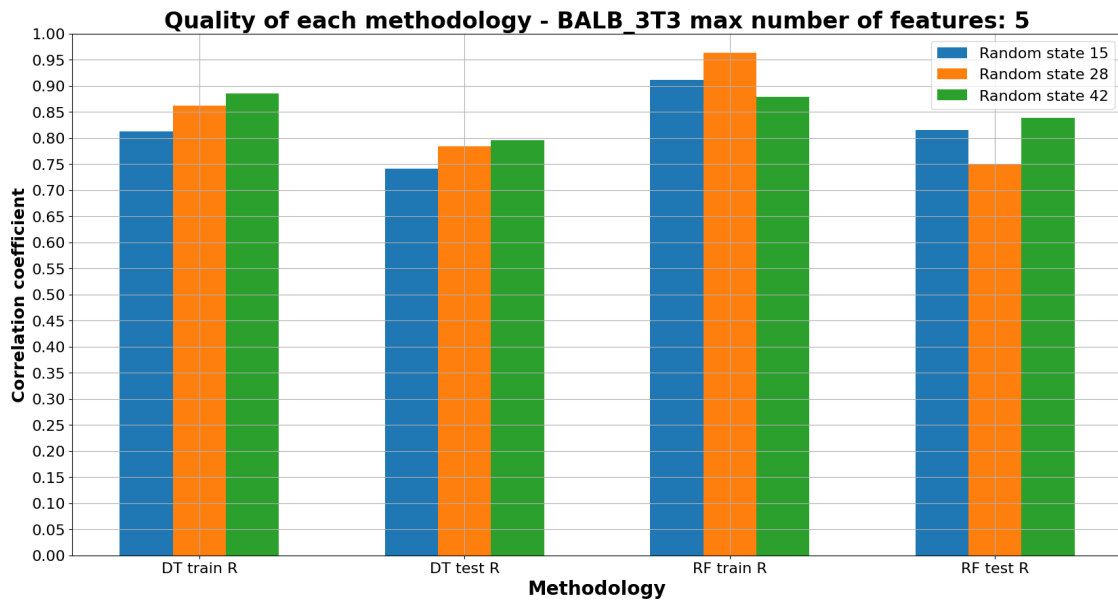

Random state - 15 ('DT - number of features used: 5.0', 'RF - number of features used: 5.0')

Random state - 28 ('DT - number of features used: 3.0', 'RF - number of features used: 5.0')

Random state - 42 ('DT - number of features used: 2.0', 'RF - number of features used: 2.0')

[0.8124040437986895, 0.7410808070808154, 0.9118596336958118, 0.8149483739246309]

[0.8618249162158247, 0.7846752040880232, 0.9628242677281924, 0.7501347353760348]

[0.885912746009139, 0.7955365930788652, 0.8792917450164119, 0.8379661052032461]

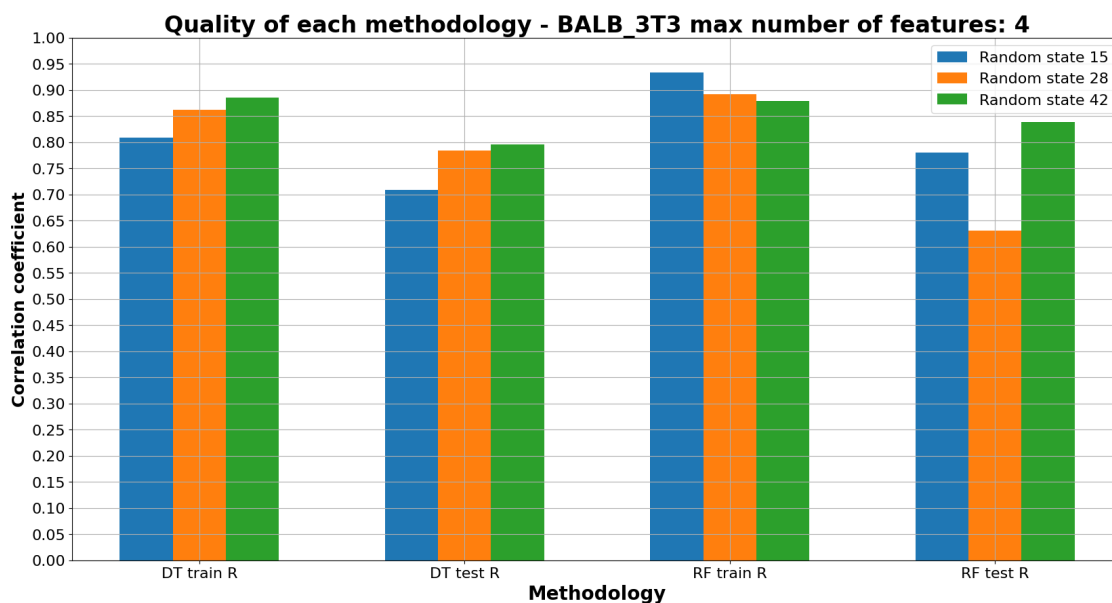

Random state - 15 ('DT - number of features used: 3.0', 'RF - number of features used: 3.0')

Random state - 28 ('DT - number of features used: 3.0', 'RF - number of features used: 2.0')

Random state - 42 ('DT - number of features used: 2.0', 'RF - number of features used: 2.0')

[0.8089681087052601, 0.7083667815152337, 0.9331579969232232, 0.7802724492277711]  
 [0.8618249162158247, 0.7846752040880232, 0.8911999290100625, 0.6303440412443166]  
 [0.885912746009139, 0.7955365930788652, 0.8792917450164119, 0.8379661052032461]

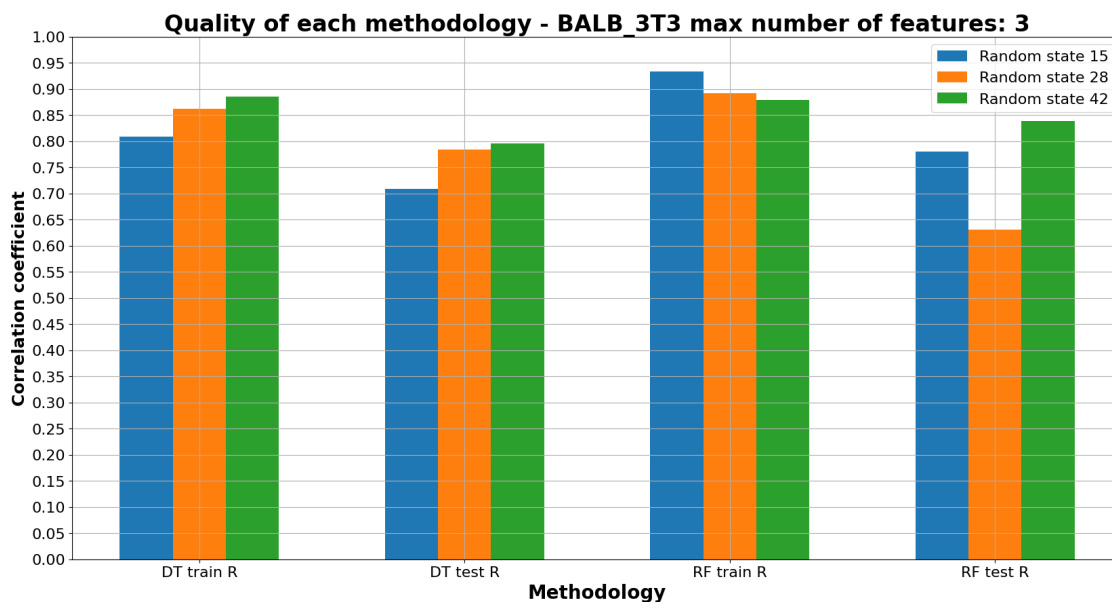

```

Random state - 15 ('DT - number of features used: 3.0', 'RF - number of features
used: 3.0')
Random state - 28 ('DT - number of features used: 3.0', 'RF - number of features
used: 2.0')
Random state - 42 ('DT - number of features used: 2.0', 'RF - number of features
used: 2.0')
[0.8089681087052601, 0.7083667815152337, 0.9331579969232232, 0.780272449227771]
[0.8618249162158247, 0.7846752040880232, 0.8911999290100625, 0.6303440412443166]
[0.885912746009139, 0.7955365930788652, 0.8792917450164119, 0.8379661052032461]

```

```
[ ]:
```

```

[21]: for i in range(8, 2, -1):
      x = prepare_best_plot('LoVo', i)
      prepare_plot(x, 'LoVo', i)
      print(handle_negative_corr(x[0]))
      print(handle_negative_corr(x[1]))
      print(handle_negative_corr(x[2]))

```

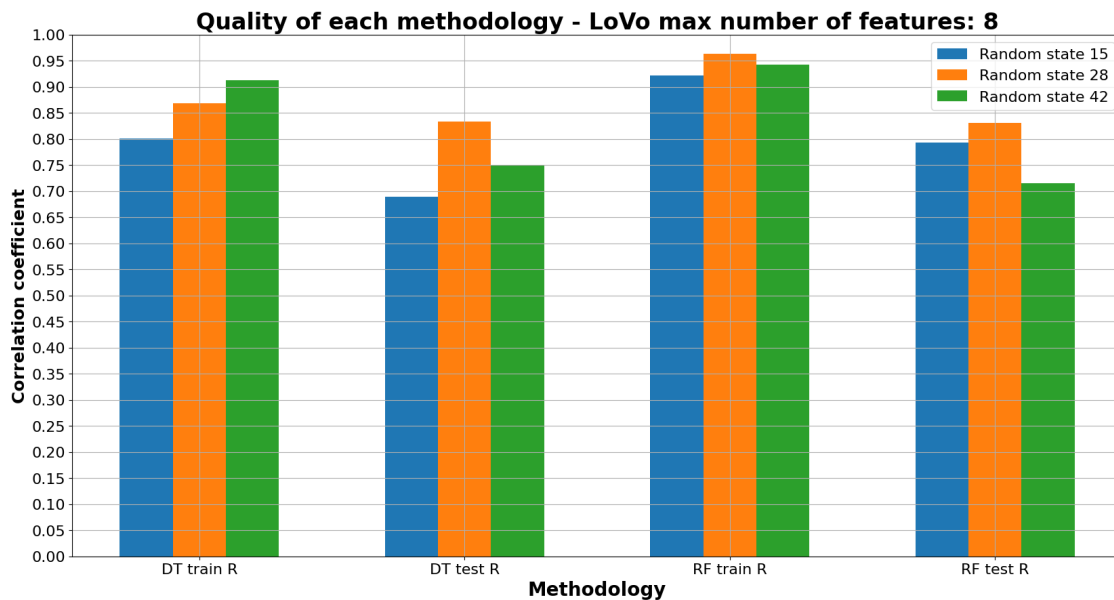

```

Random state - 15 ('DT - number of features used: 7.0', 'RF - number of features
used: 5.0')
Random state - 28 ('DT - number of features used: 3.0', 'RF - number of features
used: 7.0')
Random state - 42 ('DT - number of features used: 3.0', 'RF - number of features
used: 5.0')
[0.8012547599591731, 0.6895731340974959, 0.9218472144749, 0.7937730901899727]
[0.8682412855125715, 0.8337432078795763, 0.9636653219744876, 0.8305193093908672]

```



[0.9121710628859598, 0.7499171098832387, 0.9423441595215349, 0.7153725648027842]

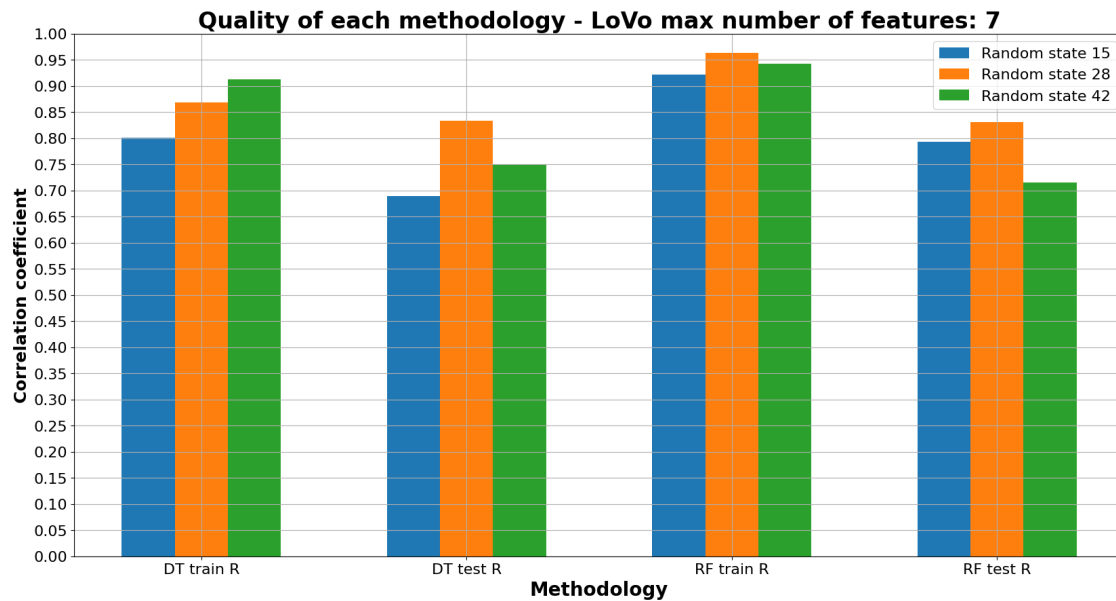

Random state - 15 ('DT - number of features used: 7.0', 'RF - number of features used: 5.0')

Random state - 28 ('DT - number of features used: 3.0', 'RF - number of features used: 7.0')

Random state - 42 ('DT - number of features used: 3.0', 'RF - number of features used: 5.0')

[0.8012547599591731, 0.6895731340974959, 0.9218472144749, 0.7937730901899727]

[0.8682412855125715, 0.8337432078795763, 0.9636653219744876, 0.8305193093908672]

[0.9121710628859598, 0.7499171098832387, 0.9423441595215349, 0.7153725648027842]

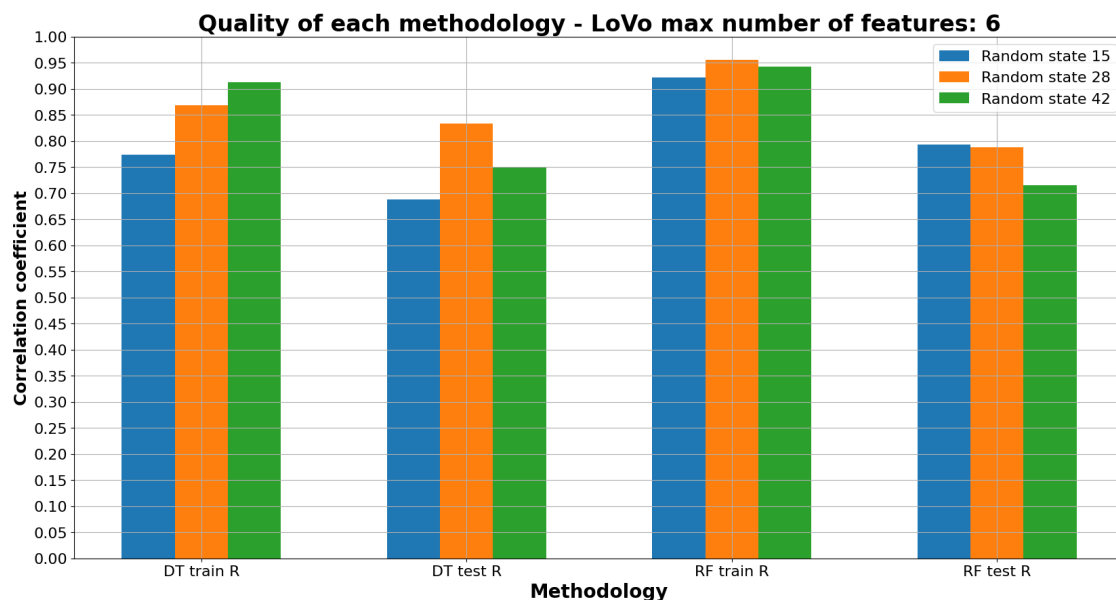

Random state - 15 ('DT - number of features used: 6.0', 'RF - number of features used: 5.0')

Random state - 28 ('DT - number of features used: 3.0', 'RF - number of features used: 6.0')

Random state - 42 ('DT - number of features used: 3.0', 'RF - number of features used: 5.0')

[0.7738495519932647, 0.6881453471088331, 0.9218472144749, 0.7937730901899727]

[0.8682412855125715, 0.8337432078795763, 0.9549618967523424, 0.7874289926703334]

[0.9121710628859598, 0.7499171098832387, 0.9423441595215349, 0.7153725648027842]

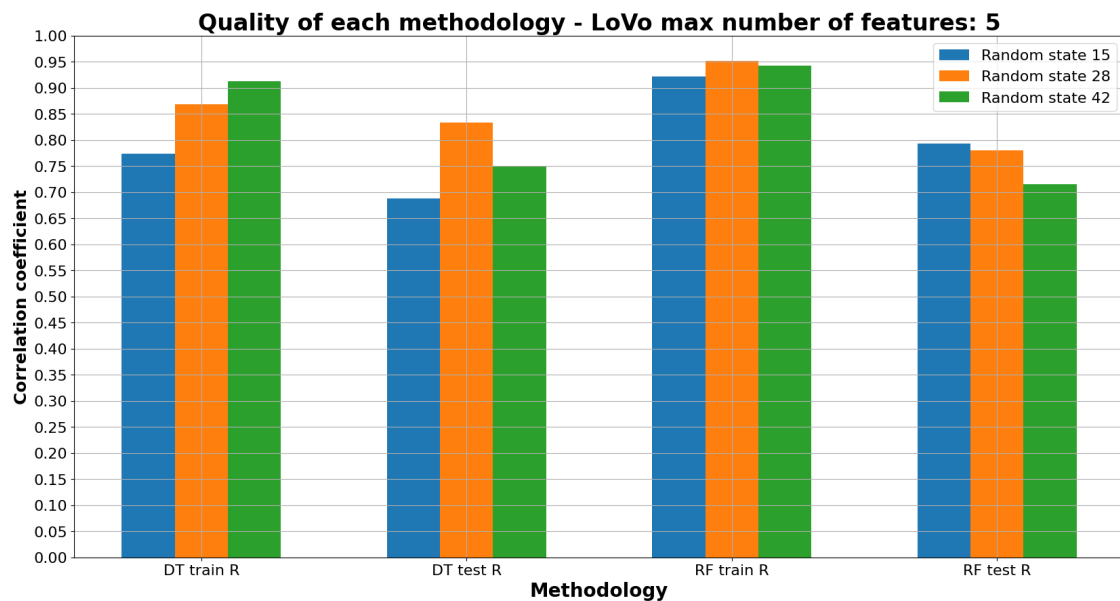

Random state - 15 ('DT - number of features used: 5.0', 'RF - number of features used: 5.0')

Random state - 28 ('DT - number of features used: 3.0', 'RF - number of features used: 5.0')

Random state - 42 ('DT - number of features used: 3.0', 'RF - number of features used: 5.0')

[0.7738495519932644, 0.688145347108833, 0.9218472144749, 0.7937730901899727]

[0.8682412855125715, 0.8337432078795763, 0.95161256233916, 0.780370388796789]

[0.9121710628859598, 0.7499171098832387, 0.9423441595215349, 0.7153725648027842]



Random state - 15 ('DT - number of features used: 3.0', 'RF - number of features used: 3.0')

Random state - 28 ('DT - number of features used: 3.0', 'RF - number of features used: 2.0')

Random state - 42 ('DT - number of features used: 3.0', 'RF - number of features used: 2.0')

[0.7738495519932647, 0.6881453471088325, 0.9435896757858103, 0.6450408235184336]

[0.8682412855125715, 0.8337432078795763, 0.8811267812945673, 0.6572630628008767]

[0.9121710628859598, 0.7499171098832387, 0.9053674539315217, 0.6872057325646179]



Random state - 15 ('DT - number of features used: 3.0', 'RF - number of features used: 3.0')

Random state - 28 ('DT - number of features used: 3.0', 'RF - number of features used: 2.0')

Random state - 42 ('DT - number of features used: 3.0', 'RF - number of features used: 2.0')

[0.7738495519932647, 0.6881453471088325, 0.9435896757858103, 0.6450408235184336]

[0.8682412855125715, 0.8337432078795763, 0.8811267812945673, 0.6572630628008767]

[0.9121710628859598, 0.7499171098832387, 0.9053674539315217, 0.6872057325646179]

```
[22]: for i in range(8, 5, -1):
      x = prepare_best_plot('LoVo_DX', i)
      prepare_plot(x, 'LoVo_DX', i)
      print(handle_negative_corr(x[0]))
      print(handle_negative_corr(x[1]))
      print(handle_negative_corr(x[2]))
```



Random state - 15 ('DT - number of features used: 7.0', 'RF - number of features used: 8.0')

Random state - 28 ('DT - number of features used: 5.0', 'RF - number of features used: 8.0')

Random state - 42 ('DT - number of features used: 7.0', 'RF - number of features used: 7.0')

[0.8724994277322107, 0.44416679666061354, 0.9531465584369622, 0.7258930436657147]

[0.9998881595139364, 0.8430877655864321, 0.9608248729709339, 0.8093430351511413]

[0.8607935732823858, 0.8271783219542648, 0.9614894965852848, 0.8437279214475684]

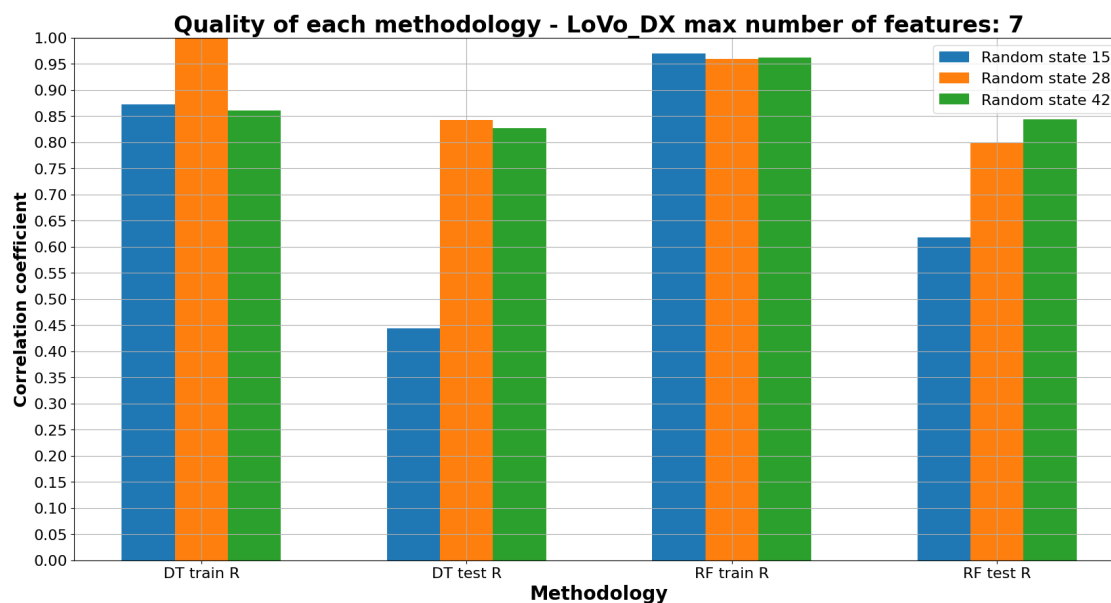

Random state - 15 ('DT - number of features used: 7.0', 'RF - number of features used: 7.0')

Random state - 28 ('DT - number of features used: 5.0', 'RF - number of features used: 7.0')

Random state - 42 ('DT - number of features used: 7.0', 'RF - number of features used: 7.0')

[0.8724994277322107, 0.44416679666061354, 0.9701730613127154, 0.6181792070920507]

[0.9998881595139364, 0.8430877655864321, 0.95913927288201, 0.7997866699043976]

[0.8607935732823858, 0.8271783219542648, 0.9614894965852848, 0.8437279214475684]

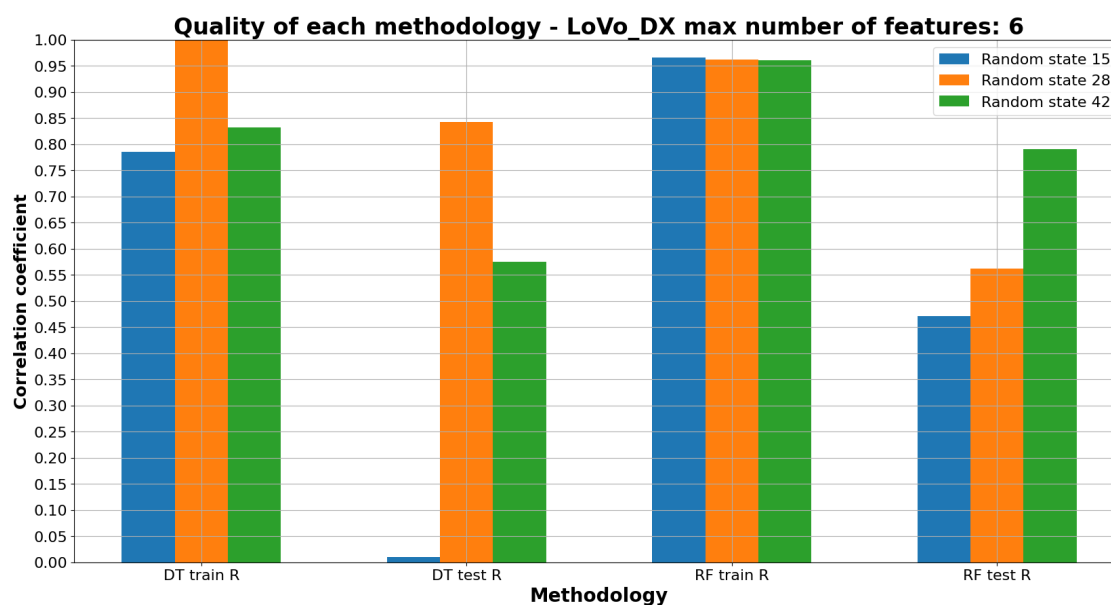

```

Random state - 15 ('DT - number of features used: 5.0', 'RF - number of features
used: 5.0')
Random state - 28 ('DT - number of features used: 5.0', 'RF - number of features
used: 5.0')
Random state - 42 ('DT - number of features used: 5.0', 'RF - number of features
used: 5.0')
[0.7851394944455857, 0.01, 0.965938844054454, 0.4715560592926372]
[0.9998881595139364, 0.8430877655864321, 0.9619512068981969, 0.5614693906239112]
[0.832498347961302, 0.5745589174162089, 0.9610074984048745, 0.790562123545645]

```

```
[ ]:
```

```

[23]: for i in range(8, 4, -1):
      x = prepare_best_plot('MCF-7', i)
      prepare_plot(x, 'MCF-7', i)
      print(handle_negative_corr(x[0]))
      print(handle_negative_corr(x[1]))
      print(handle_negative_corr(x[2]))

```



```

Random state - 15 ('DT - number of features used: 6.0', 'RF - number of features
used: 8.0')
Random state - 28 ('DT - number of features used: 4.0', 'RF - number of features
used: 8.0')
Random state - 42 ('DT - number of features used: 8.0', 'RF - number of features
used: 8.0')
[0.8435310621038742, 0.8490631015009857, 0.9361673240230982, 0.8695068587619961]

```

[0.8067266275260266, 0.5788863720704619, 0.9745022739926398, 0.7974479201634584]  
 [0.9607100088789956, 0.8246123913884399, 0.9643673177108916, 0.7746407763544272]



Random state - 15 ('DT - number of features used: 6.0', 'RF - number of features used: 6.0')

Random state - 28 ('DT - number of features used: 4.0', 'RF - number of features used: 6.0')

Random state - 42 ('DT - number of features used: 6.0', 'RF - number of features used: 6.0')

[0.8435310621038742, 0.8490631015009857, 0.945156244145722, 0.8470828152088354]  
 [0.8067266275260266, 0.5788863720704619, 0.9622709929006865, 0.7725823523082598]  
 [0.9250974432855168, 0.6663870801375169, 0.9527501485389981, 0.6624039809877339]



Random state - 15 ('DT - number of features used: 6.0', 'RF - number of features used: 6.0')

Random state - 28 ('DT - number of features used: 4.0', 'RF - number of features used: 6.0')

Random state - 42 ('DT - number of features used: 6.0', 'RF - number of features used: 6.0')

[0.8435310621038742, 0.8490631015009857, 0.945156244145722, 0.8470828152088354]

[0.8067266275260266, 0.5788863720704619, 0.9622709929006865, 0.7725823523082598]

[0.9250974432855168, 0.6663870801375169, 0.9527501485389981, 0.6624039809877339]





```

Random state - 15 ('DT - number of features used: 4.0', 'RF - number of features
used: 4.0')
Random state - 28 ('DT - number of features used: 4.0', 'RF - number of features
used: 4.0')
Random state - 42 ('DT - number of features used: 4.0', 'RF - number of features
used: 4.0')
[0.7959369681181857, 0.7660302989047363, 0.9051955244679118, 0.7837627386732194]
[0.8067266275260266, 0.5788863720704619, 0.9563828487646977, 0.6924899356899538]
[0.8646854500902919, 0.5371299141302905, 0.956767076965924, 0.6292292538599767]

```

[ ]:

[ ]:

## 1.7 Best models plot

Comments: (see different random states for each model)

- A549 -> random state 15, 5 features DT, 5 features RF

1. MLR (0.65, 0.55) -> 3 features
2. DT (0.92, 0.84) -> 5 features
3. RF (0.92, 0.82) -> 5 features
4. KNN (0.77, 0.83) -> 5 features
5. SVM (0.64, 0.18) -> 3 features

- BALB/3T3 -> random state 42, 6 features RF

1. MLR (0.73, 0.01) -> 3 features
2. DT (0.86, 0.75) -> 6 features
3. RF (0.93, 0.85) -> 6 features
4. KNN (0.77, 0.22) -> 3 features
5. SVM (0.68, 0.17) -> 3 features

- LoVo -> random state 28, 2 features RF

1. MLR (0.69, 0.40) -> 3 features
2. DT (0.94, 0.82) -> 5 features
3. RF (0.85, 0.70) -> 2 features
4. KNN (0.73, 0.38) -> 5 features
5. SVM (0.70, 0.01) -> 5 features

- LoVo/DX -> random state 42, 5 features RF

1. MLR (0.82, 0.78) -> 7 features
2. DT (0.86, 0.84) -> 7 features
3. RF (0.96, 0.83) -> 5 features
4. KNN (0.81, 0.01) -> 5 features
5. SVM (0.70, 0.63) -> 5 features

- MCF-7 -> random state 15, 4 features RF

1. MLR (0.70, 0.61) -> 4 features
2. DT (0.92, 0.53) -> 4 features
3. RF (0.91, 0.65) -> 4 features
4. KNN (0.70, 0.75) -> 4 features
5. SVM (0.69, 0.53) -> 4 features

```
[24]: df_a549 = pd.read_excel('../Data/Quality_A549_15_.xlsx', sheet_name='RF')
df_a549 = df_a549[df_a549['Number of features'] == 5]
df_a549['Training data R score'] = handle_negative_corr(df_a549['Training data_
↪R^2 score'])
df_a549['Test data R score'] = handle_negative_corr(df_a549['Test data R^2_
↪score'])
df_a549
```

```
[24]: Unnamed: 0 Correlation threshold Training data R^2 score \
323      323      0.50      0.852952
324      324      0.50      0.860201
325      325      0.50      0.865749
326      326      0.50      0.887848
327      327      0.50      0.888773
328      328      0.50      0.892504
329      329      0.50      0.908859
330      330      0.50      0.909170
331      331      0.50      0.913283
332      332      0.50      0.918630
333      333      0.50      0.917600
334      334      0.50      0.915991
335      335      0.50      0.921486
336      336      0.50      0.924538
337      337      0.50      0.921465
338      338      0.50      0.922737
339      339      0.50      0.924854
340      340      0.50      0.927070
341      341      0.50      0.920711
342      342      0.51      0.852952
343      343      0.51      0.860201
344      344      0.51      0.865749
345      345      0.51      0.887848
346      346      0.51      0.888773
347      347      0.51      0.892504
348      348      0.51      0.908859
349      349      0.51      0.909170
350      350      0.51      0.913283
351      351      0.51      0.918630
352      352      0.51      0.917600
353      353      0.51      0.915991
354      354      0.51      0.921486
```

|     |     |      |          |
|-----|-----|------|----------|
| 355 | 355 | 0.51 | 0.924538 |
| 356 | 356 | 0.51 | 0.921465 |
| 357 | 357 | 0.51 | 0.922737 |
| 358 | 358 | 0.51 | 0.924854 |
| 359 | 359 | 0.51 | 0.927070 |
| 360 | 360 | 0.51 | 0.920711 |

|     | Test data R <sup>2</sup> score | Training RMSE | Test RMSE | Number of features \ |
|-----|--------------------------------|---------------|-----------|----------------------|
| 323 | 0.693940                       | 0.357987      | 0.573479  | 5                    |
| 324 | 0.699356                       | 0.349052      | 0.568382  | 5                    |
| 325 | 0.668966                       | 0.342057      | 0.596418  | 5                    |
| 326 | 0.623941                       | 0.312638      | 0.635685  | 5                    |
| 327 | 0.648644                       | 0.311347      | 0.614452  | 5                    |
| 328 | 0.672695                       | 0.306080      | 0.593049  | 5                    |
| 329 | 0.683983                       | 0.281835      | 0.582732  | 5                    |
| 330 | 0.668412                       | 0.281354      | 0.596917  | 5                    |
| 331 | 0.710288                       | 0.274910      | 0.557952  | 5                    |
| 332 | 0.703868                       | 0.266300      | 0.564101  | 5                    |
| 333 | 0.707403                       | 0.267980      | 0.560723  | 5                    |
| 334 | 0.732924                       | 0.270583      | 0.535712  | 5                    |
| 335 | 0.736283                       | 0.261585      | 0.532333  | 5                    |
| 336 | 0.734897                       | 0.256449      | 0.533730  | 5                    |
| 337 | 0.729516                       | 0.261619      | 0.539119  | 5                    |
| 338 | 0.743151                       | 0.259492      | 0.525356  | 5                    |
| 339 | 0.739241                       | 0.255913      | 0.529339  | 5                    |
| 340 | 0.734946                       | 0.252110      | 0.533681  | 5                    |
| 341 | 0.737105                       | 0.262872      | 0.531502  | 5                    |
| 342 | 0.693940                       | 0.357987      | 0.573479  | 5                    |
| 343 | 0.699356                       | 0.349052      | 0.568382  | 5                    |
| 344 | 0.668966                       | 0.342057      | 0.596418  | 5                    |
| 345 | 0.623941                       | 0.312638      | 0.635685  | 5                    |
| 346 | 0.648644                       | 0.311347      | 0.614452  | 5                    |
| 347 | 0.672695                       | 0.306080      | 0.593049  | 5                    |
| 348 | 0.683983                       | 0.281835      | 0.582732  | 5                    |
| 349 | 0.668412                       | 0.281354      | 0.596917  | 5                    |
| 350 | 0.710288                       | 0.274910      | 0.557952  | 5                    |
| 351 | 0.703868                       | 0.266300      | 0.564101  | 5                    |
| 352 | 0.707403                       | 0.267980      | 0.560723  | 5                    |
| 353 | 0.732924                       | 0.270583      | 0.535712  | 5                    |
| 354 | 0.736283                       | 0.261585      | 0.532333  | 5                    |
| 355 | 0.734897                       | 0.256449      | 0.533730  | 5                    |
| 356 | 0.729516                       | 0.261619      | 0.539119  | 5                    |
| 357 | 0.743151                       | 0.259492      | 0.525356  | 5                    |
| 358 | 0.739241                       | 0.255913      | 0.529339  | 5                    |
| 359 | 0.734946                       | 0.252110      | 0.533681  | 5                    |
| 360 | 0.737105                       | 0.262872      | 0.531502  | 5                    |

|     | Number of estimators | Training data R score | Test data R score |
|-----|----------------------|-----------------------|-------------------|
| 323 | 2                    | 0.923554              | 0.833031          |
| 324 | 3                    | 0.927470              | 0.836275          |
| 325 | 4                    | 0.930456              | 0.817903          |
| 326 | 5                    | 0.942257              | 0.789899          |
| 327 | 6                    | 0.942747              | 0.805384          |
| 328 | 7                    | 0.944724              | 0.820180          |
| 329 | 8                    | 0.953341              | 0.827033          |
| 330 | 9                    | 0.953504              | 0.817564          |
| 331 | 10                   | 0.955658              | 0.842786          |
| 332 | 11                   | 0.958452              | 0.838968          |
| 333 | 12                   | 0.957914              | 0.841073          |
| 334 | 13                   | 0.957074              | 0.856110          |
| 335 | 14                   | 0.959941              | 0.858069          |
| 336 | 15                   | 0.961529              | 0.857261          |
| 337 | 16                   | 0.959930              | 0.854117          |
| 338 | 17                   | 0.960592              | 0.862062          |
| 339 | 18                   | 0.961693              | 0.859791          |
| 340 | 19                   | 0.962845              | 0.857290          |
| 341 | 20                   | 0.959537              | 0.858548          |
| 342 | 2                    | 0.923554              | 0.833031          |
| 343 | 3                    | 0.927470              | 0.836275          |
| 344 | 4                    | 0.930456              | 0.817903          |
| 345 | 5                    | 0.942257              | 0.789899          |
| 346 | 6                    | 0.942747              | 0.805384          |
| 347 | 7                    | 0.944724              | 0.820180          |
| 348 | 8                    | 0.953341              | 0.827033          |
| 349 | 9                    | 0.953504              | 0.817564          |
| 350 | 10                   | 0.955658              | 0.842786          |
| 351 | 11                   | 0.958452              | 0.838968          |
| 352 | 12                   | 0.957914              | 0.841073          |
| 353 | 13                   | 0.957074              | 0.856110          |
| 354 | 14                   | 0.959941              | 0.858069          |
| 355 | 15                   | 0.961529              | 0.857261          |
| 356 | 16                   | 0.959930              | 0.854117          |
| 357 | 17                   | 0.960592              | 0.862062          |
| 358 | 18                   | 0.961693              | 0.859791          |
| 359 | 19                   | 0.962845              | 0.857290          |
| 360 | 20                   | 0.959537              | 0.858548          |

```
[25]: df_ = pd.read_excel('../Data/Quality_BALB_3T3_42_.xlsx', sheet_name='RF')
df_ = df_[df_['Number of features'] == 6]
df_['Training data R score'] = handle_negative_corr(df_['Training data R^2_
↵score'])
df_['Test data R score'] = handle_negative_corr(df_['Test data R^2 score'])
df_
```

```

[25]: Unnamed: 0 Correlation threshold Training data R^2 score \
342      342      0.51      0.869233
343      343      0.51      0.923683
344      344      0.51      0.934524
345      345      0.51      0.937457
346      346      0.51      0.929701
347      347      0.51      0.940844
348      348      0.51      0.945992
349      349      0.51      0.943862
350      350      0.51      0.940881
351      351      0.51      0.940214
352      352      0.51      0.939011
353      353      0.51      0.939990
354      354      0.51      0.941761
355      355      0.51      0.945607
356      356      0.51      0.946995
357      357      0.51      0.948830
358      358      0.51      0.946417
359      359      0.51      0.944971
360      360      0.51      0.943980

      Test data R^2 score Training RMSE Test RMSE Number of features \
342      0.716186      0.318598      0.424152      6
343      0.597886      0.243391      0.504870      6
344      0.681066      0.225443      0.449630      6
345      0.701507      0.220334      0.434983      6
346      0.675674      0.233598      0.453414      6
347      0.604822      0.214286      0.500497      6
348      0.648896      0.204749      0.471762      6
349      0.649432      0.208749      0.471401      6
350      0.665910      0.214219      0.460189      6
351      0.664213      0.215424      0.461356      6
352      0.683600      0.217581      0.447840      6
353      0.657975      0.215827      0.465622      6
354      0.616112      0.212619      0.493295      6
355      0.597845      0.205478      0.504895      6
356      0.570470      0.202840      0.521797      6
357      0.577984      0.199298      0.517213      6
358      0.591313      0.203942      0.508979      6
359      0.588724      0.206677      0.510589      6
360      0.591825      0.208528      0.508661      6

      Number of estimators Training data R score Test data R score
342      2      0.932327      0.846278
343      3      0.961084      0.773231
344      4      0.966708      0.825268
345      5      0.968224      0.837560

```

|     |    |          |          |
|-----|----|----------|----------|
| 346 | 6  | 0.964210 | 0.821994 |
| 347 | 7  | 0.969971 | 0.777703 |
| 348 | 8  | 0.972621 | 0.805541 |
| 349 | 9  | 0.971525 | 0.805873 |
| 350 | 10 | 0.969990 | 0.816033 |
| 351 | 11 | 0.969646 | 0.814993 |
| 352 | 12 | 0.969026 | 0.826801 |
| 353 | 13 | 0.969531 | 0.811157 |
| 354 | 14 | 0.970444 | 0.784928 |
| 355 | 15 | 0.972423 | 0.773204 |
| 356 | 16 | 0.973136 | 0.755294 |
| 357 | 17 | 0.974079 | 0.760253 |
| 358 | 18 | 0.972840 | 0.768969 |
| 359 | 19 | 0.972096 | 0.767284 |
| 360 | 20 | 0.971586 | 0.769301 |

```
[ ]:
```

```
[26]: df_ = pd.read_excel('../Data/Quality_LoVo_28_.xlsx', sheet_name='RF')
df_ = df_[df_['Number of features'] == 2]
df_['Training data R score'] = handle_negative_corr(df_['Training data R^2_
↪score'])
df_['Test data R score'] = handle_negative_corr(df_['Test data R^2 score'])
df_
```

```
[26]: Unnamed: 0 Correlation threshold Training data R^2 score \
380 380 0.53 0.726452
381 381 0.53 0.730699
382 382 0.53 0.729826
383 383 0.53 0.755753
384 384 0.53 0.772016
385 385 0.53 0.771714
386 386 0.53 0.773504
387 387 0.53 0.772194
388 388 0.53 0.770797
389 389 0.53 0.777861
390 390 0.53 0.780498
391 391 0.53 0.779444
392 392 0.53 0.783158
393 393 0.53 0.778982
394 394 0.53 0.780691
395 395 0.53 0.781139
396 396 0.53 0.776384
397 397 0.53 0.775154
398 398 0.53 0.775951
399 399 0.54 0.726452
400 400 0.54 0.730699
```

|     |     |      |          |
|-----|-----|------|----------|
| 401 | 401 | 0.54 | 0.729826 |
| 402 | 402 | 0.54 | 0.755753 |
| 403 | 403 | 0.54 | 0.772016 |
| 404 | 404 | 0.54 | 0.771714 |
| 405 | 405 | 0.54 | 0.773504 |
| 406 | 406 | 0.54 | 0.772194 |
| 407 | 407 | 0.54 | 0.770797 |
| 408 | 408 | 0.54 | 0.777861 |
| 409 | 409 | 0.54 | 0.780498 |
| 410 | 410 | 0.54 | 0.779444 |
| 411 | 411 | 0.54 | 0.783158 |
| 412 | 412 | 0.54 | 0.778982 |
| 413 | 413 | 0.54 | 0.780691 |
| 414 | 414 | 0.54 | 0.781139 |
| 415 | 415 | 0.54 | 0.776384 |
| 416 | 416 | 0.54 | 0.775154 |
| 417 | 417 | 0.54 | 0.775951 |

|     | Test data R <sup>2</sup> score | Training RMSE | Test RMSE | Number of features \ |
|-----|--------------------------------|---------------|-----------|----------------------|
| 380 | 0.267403                       | 0.490898      | 0.573263  | 2                    |
| 381 | 0.199666                       | 0.487072      | 0.599180  | 2                    |
| 382 | 0.237774                       | 0.487861      | 0.584741  | 2                    |
| 383 | 0.311228                       | 0.463862      | 0.555852  | 2                    |
| 384 | 0.352617                       | 0.448153      | 0.538893  | 2                    |
| 385 | 0.376864                       | 0.448449      | 0.528704  | 2                    |
| 386 | 0.352702                       | 0.446688      | 0.538857  | 2                    |
| 387 | 0.319981                       | 0.447978      | 0.552309  | 2                    |
| 388 | 0.336020                       | 0.449349      | 0.545757  | 2                    |
| 389 | 0.334133                       | 0.442371      | 0.546531  | 2                    |
| 390 | 0.299672                       | 0.439737      | 0.560496  | 2                    |
| 391 | 0.317294                       | 0.440791      | 0.553399  | 2                    |
| 392 | 0.339342                       | 0.437064      | 0.544390  | 2                    |
| 393 | 0.395078                       | 0.441253      | 0.520920  | 2                    |
| 394 | 0.403927                       | 0.439544      | 0.517096  | 2                    |
| 395 | 0.403071                       | 0.439095      | 0.517467  | 2                    |
| 396 | 0.431995                       | 0.443838      | 0.504775  | 2                    |
| 397 | 0.404526                       | 0.445058      | 0.516836  | 2                    |
| 398 | 0.380702                       | 0.444269      | 0.527074  | 2                    |
| 399 | 0.267403                       | 0.490898      | 0.573263  | 2                    |
| 400 | 0.199666                       | 0.487072      | 0.599180  | 2                    |
| 401 | 0.237774                       | 0.487861      | 0.584741  | 2                    |
| 402 | 0.311228                       | 0.463862      | 0.555852  | 2                    |
| 403 | 0.352617                       | 0.448153      | 0.538893  | 2                    |
| 404 | 0.376864                       | 0.448449      | 0.528704  | 2                    |
| 405 | 0.352702                       | 0.446688      | 0.538857  | 2                    |
| 406 | 0.319981                       | 0.447978      | 0.552309  | 2                    |
| 407 | 0.336020                       | 0.449349      | 0.545757  | 2                    |

|     |          |          |          |   |
|-----|----------|----------|----------|---|
| 408 | 0.334133 | 0.442371 | 0.546531 | 2 |
| 409 | 0.299672 | 0.439737 | 0.560496 | 2 |
| 410 | 0.317294 | 0.440791 | 0.553399 | 2 |
| 411 | 0.339342 | 0.437064 | 0.544390 | 2 |
| 412 | 0.395078 | 0.441253 | 0.520920 | 2 |
| 413 | 0.403927 | 0.439544 | 0.517096 | 2 |
| 414 | 0.403071 | 0.439095 | 0.517467 | 2 |
| 415 | 0.431995 | 0.443838 | 0.504775 | 2 |
| 416 | 0.404526 | 0.445058 | 0.516836 | 2 |
| 417 | 0.380702 | 0.444269 | 0.527074 | 2 |

|     | Number of estimators | Training data R score | Test data R score |
|-----|----------------------|-----------------------|-------------------|
| 380 | 2                    | 0.852321              | 0.517110          |
| 381 | 3                    | 0.854809              | 0.446839          |
| 382 | 4                    | 0.854298              | 0.487620          |
| 383 | 5                    | 0.869341              | 0.557879          |
| 384 | 6                    | 0.878644              | 0.593815          |
| 385 | 7                    | 0.878473              | 0.613892          |
| 386 | 8                    | 0.879491              | 0.593887          |
| 387 | 9                    | 0.878746              | 0.565669          |
| 388 | 10                   | 0.877951              | 0.579672          |
| 389 | 11                   | 0.881964              | 0.578042          |
| 390 | 12                   | 0.883458              | 0.547423          |
| 391 | 13                   | 0.882861              | 0.563289          |
| 392 | 14                   | 0.884962              | 0.582531          |
| 393 | 15                   | 0.882600              | 0.628552          |
| 394 | 16                   | 0.883567              | 0.635553          |
| 395 | 17                   | 0.883821              | 0.634879          |
| 396 | 18                   | 0.881127              | 0.657263          |
| 397 | 19                   | 0.880428              | 0.636024          |
| 398 | 20                   | 0.880881              | 0.617010          |
| 399 | 2                    | 0.852321              | 0.517110          |
| 400 | 3                    | 0.854809              | 0.446839          |
| 401 | 4                    | 0.854298              | 0.487620          |
| 402 | 5                    | 0.869341              | 0.557879          |
| 403 | 6                    | 0.878644              | 0.593815          |
| 404 | 7                    | 0.878473              | 0.613892          |
| 405 | 8                    | 0.879491              | 0.593887          |
| 406 | 9                    | 0.878746              | 0.565669          |
| 407 | 10                   | 0.877951              | 0.579672          |
| 408 | 11                   | 0.881964              | 0.578042          |
| 409 | 12                   | 0.883458              | 0.547423          |
| 410 | 13                   | 0.882861              | 0.563289          |
| 411 | 14                   | 0.884962              | 0.582531          |
| 412 | 15                   | 0.882600              | 0.628552          |
| 413 | 16                   | 0.883567              | 0.635553          |
| 414 | 17                   | 0.883821              | 0.634879          |



|     |    |          |          |
|-----|----|----------|----------|
| 415 | 18 | 0.881127 | 0.657263 |
| 416 | 19 | 0.880428 | 0.636024 |
| 417 | 20 | 0.880881 | 0.617010 |

[ ]:

```
[27]: df_ = pd.read_excel('../Data/Quality_LoVo_DX_42_.xlsx', sheet_name='RF')
df_ = df_[df_['Number of features'] == 5]
df_['Training data R score'] = handle_negative_corr(df_['Training data R^2_↵
score'])
df_['Test data R score'] = handle_negative_corr(df_['Test data R^2 score'])
df_
```

```
[27]: Unnamed: 0 Correlation threshold Training data R^2 score \
570      570      0.63      0.849392
571      571      0.63      0.877695
572      572      0.63      0.886607
573      573      0.63      0.894969
574      574      0.63      0.904921
575      575      0.63      0.918333
576      576      0.63      0.916942
577      577      0.63      0.923954
578      578      0.63      0.918480
579      579      0.63      0.920255
580      580      0.63      0.916592
581      581      0.63      0.916344
582      582      0.63      0.923535
583      583      0.63      0.927928
584      584      0.63      0.931174
585      585      0.63      0.934467
586      586      0.63      0.935167
587      587      0.63      0.937938
588      588      0.63      0.937747

Test data R^2 score Training RMSE Test RMSE Number of features \
570      0.290146      0.373186      0.608242      5
571      0.320146      0.336297      0.595251      5
572      0.387461      0.323813      0.565014      5
573      0.467702      0.311645      0.526707      5
574      0.516674      0.296513      0.501895      5
575      0.530785      0.274806      0.494514      5
576      0.617333      0.277136      0.446583      5
577      0.602381      0.265179      0.455225      5
578      0.586091      0.274558      0.464456      5
579      0.563115      0.271552      0.477173      5
580      0.592591      0.277719      0.460795      5
581      0.612007      0.278132      0.449681      5
```

|     |          |          |          |   |
|-----|----------|----------|----------|---|
| 582 | 0.624988 | 0.265908 | 0.442094 | 5 |
| 583 | 0.607313 | 0.258158 | 0.452393 | 5 |
| 584 | 0.616693 | 0.252278 | 0.446957 | 5 |
| 585 | 0.605643 | 0.246168 | 0.453354 | 5 |
| 586 | 0.608711 | 0.244850 | 0.451587 | 5 |
| 587 | 0.602155 | 0.239559 | 0.455354 | 5 |
| 588 | 0.598890 | 0.239929 | 0.457218 | 5 |

|     | Number of estimators | Training data R score | Test data R score |
|-----|----------------------|-----------------------|-------------------|
| 570 | 2                    | 0.921625              | 0.538652          |
| 571 | 3                    | 0.936854              | 0.565815          |
| 572 | 4                    | 0.941598              | 0.622463          |
| 573 | 5                    | 0.946028              | 0.683888          |
| 574 | 6                    | 0.951273              | 0.718800          |
| 575 | 7                    | 0.958297              | 0.728550          |
| 576 | 8                    | 0.957571              | 0.785706          |
| 577 | 9                    | 0.961225              | 0.776132          |
| 578 | 10                   | 0.958374              | 0.765566          |
| 579 | 11                   | 0.959299              | 0.750410          |
| 580 | 12                   | 0.957388              | 0.769800          |
| 581 | 13                   | 0.957258              | 0.782309          |
| 582 | 14                   | 0.961007              | 0.790562          |
| 583 | 15                   | 0.963290              | 0.779303          |
| 584 | 16                   | 0.964973              | 0.785298          |
| 585 | 17                   | 0.966678              | 0.778231          |
| 586 | 18                   | 0.967040              | 0.780199          |
| 587 | 19                   | 0.968472              | 0.775987          |
| 588 | 20                   | 0.968373              | 0.773880          |

```
[ ]:
```

```
[28]: df_ = pd.read_excel('../Data/Quality_MCF-7_15_.xlsx', sheet_name='RF')
df_ = df_[df_['Number of features'] == 4]
df_['Training data R score'] = handle_negative_corr(df_['Training data R^2 score'])
df_['Test data R score'] = handle_negative_corr(df_['Test data R^2 score'])
df_
```

```
[28]: Unnamed: 0 Correlation threshold Training data R^2 score \
323 323 0.50 0.823725
324 324 0.50 0.819379
325 325 0.50 0.861725
326 326 0.50 0.861772
327 327 0.50 0.876076
328 328 0.50 0.887302
329 329 0.50 0.891312
330 330 0.50 0.885151
```

|     |     |      |          |
|-----|-----|------|----------|
| 331 | 331 | 0.50 | 0.897883 |
| 332 | 332 | 0.50 | 0.900694 |
| 333 | 333 | 0.50 | 0.898891 |
| 334 | 334 | 0.50 | 0.897355 |
| 335 | 335 | 0.50 | 0.903932 |
| 336 | 336 | 0.50 | 0.902161 |
| 337 | 337 | 0.50 | 0.897602 |
| 338 | 338 | 0.50 | 0.901345 |
| 339 | 339 | 0.50 | 0.903325 |
| 340 | 340 | 0.50 | 0.909007 |
| 341 | 341 | 0.50 | 0.910494 |
| 342 | 342 | 0.51 | 0.823725 |
| 343 | 343 | 0.51 | 0.819379 |
| 344 | 344 | 0.51 | 0.861725 |
| 345 | 345 | 0.51 | 0.861772 |
| 346 | 346 | 0.51 | 0.876076 |
| 347 | 347 | 0.51 | 0.887302 |
| 348 | 348 | 0.51 | 0.891312 |
| 349 | 349 | 0.51 | 0.885151 |
| 350 | 350 | 0.51 | 0.897883 |
| 351 | 351 | 0.51 | 0.900694 |
| 352 | 352 | 0.51 | 0.898891 |
| 353 | 353 | 0.51 | 0.897355 |
| 354 | 354 | 0.51 | 0.903932 |
| 355 | 355 | 0.51 | 0.902161 |
| 356 | 356 | 0.51 | 0.897602 |
| 357 | 357 | 0.51 | 0.901345 |
| 358 | 358 | 0.51 | 0.903325 |
| 359 | 359 | 0.51 | 0.909007 |
| 360 | 360 | 0.51 | 0.910494 |

|     | Test data $R^2$ score | Training RMSE | Test RMSE | Number of features \ |
|-----|-----------------------|---------------|-----------|----------------------|
| 323 | 0.492083              | 0.390625      | 0.767939  | 4                    |
| 324 | 0.614284              | 0.395412      | 0.669213  | 4                    |
| 325 | 0.495651              | 0.345969      | 0.765237  | 4                    |
| 326 | 0.472072              | 0.345911      | 0.782920  | 4                    |
| 327 | 0.532895              | 0.327523      | 0.736440  | 4                    |
| 328 | 0.499692              | 0.312337      | 0.762165  | 4                    |
| 329 | 0.494367              | 0.306729      | 0.766211  | 4                    |
| 330 | 0.462619              | 0.315304      | 0.789899  | 4                    |
| 331 | 0.422784              | 0.297314      | 0.818652  | 4                    |
| 332 | 0.424585              | 0.293192      | 0.817374  | 4                    |
| 333 | 0.451898              | 0.295842      | 0.797739  | 4                    |
| 334 | 0.480492              | 0.298081      | 0.776652  | 4                    |
| 335 | 0.482197              | 0.288373      | 0.775377  | 4                    |
| 336 | 0.522720              | 0.291019      | 0.744418  | 4                    |
| 337 | 0.531393              | 0.297722      | 0.737623  | 4                    |

|     |          |          |          |   |
|-----|----------|----------|----------|---|
| 338 | 0.536501 | 0.292231 | 0.733593 | 4 |
| 339 | 0.532348 | 0.289282 | 0.736871 | 4 |
| 340 | 0.534079 | 0.280653 | 0.735506 | 4 |
| 341 | 0.539028 | 0.278349 | 0.731589 | 4 |
| 342 | 0.492083 | 0.390625 | 0.767939 | 4 |
| 343 | 0.614284 | 0.395412 | 0.669213 | 4 |
| 344 | 0.495651 | 0.345969 | 0.765237 | 4 |
| 345 | 0.472072 | 0.345911 | 0.782920 | 4 |
| 346 | 0.532895 | 0.327523 | 0.736440 | 4 |
| 347 | 0.499692 | 0.312337 | 0.762165 | 4 |
| 348 | 0.494367 | 0.306729 | 0.766211 | 4 |
| 349 | 0.462619 | 0.315304 | 0.789899 | 4 |
| 350 | 0.422784 | 0.297314 | 0.818652 | 4 |
| 351 | 0.424585 | 0.293192 | 0.817374 | 4 |
| 352 | 0.451898 | 0.295842 | 0.797739 | 4 |
| 353 | 0.480492 | 0.298081 | 0.776652 | 4 |
| 354 | 0.482197 | 0.288373 | 0.775377 | 4 |
| 355 | 0.522720 | 0.291019 | 0.744418 | 4 |
| 356 | 0.531393 | 0.297722 | 0.737623 | 4 |
| 357 | 0.536501 | 0.292231 | 0.733593 | 4 |
| 358 | 0.532348 | 0.289282 | 0.736871 | 4 |
| 359 | 0.534079 | 0.280653 | 0.735506 | 4 |
| 360 | 0.539028 | 0.278349 | 0.731589 | 4 |

|     | Number of estimators | Training data R score | Test data R score |
|-----|----------------------|-----------------------|-------------------|
| 323 | 2                    | 0.907593              | 0.701486          |
| 324 | 3                    | 0.905196              | 0.783763          |
| 325 | 4                    | 0.928291              | 0.704025          |
| 326 | 5                    | 0.928317              | 0.687075          |
| 327 | 6                    | 0.935989              | 0.729997          |
| 328 | 7                    | 0.941967              | 0.706889          |
| 329 | 8                    | 0.944093              | 0.703112          |
| 330 | 9                    | 0.940824              | 0.680161          |
| 331 | 10                   | 0.947567              | 0.650219          |
| 332 | 11                   | 0.949049              | 0.651602          |
| 333 | 12                   | 0.948099              | 0.672234          |
| 334 | 13                   | 0.947288              | 0.693176          |
| 335 | 14                   | 0.950753              | 0.694404          |
| 336 | 15                   | 0.949821              | 0.722994          |
| 337 | 16                   | 0.947419              | 0.728967          |
| 338 | 17                   | 0.949392              | 0.732462          |
| 339 | 18                   | 0.950434              | 0.729622          |
| 340 | 19                   | 0.953419              | 0.730807          |
| 341 | 20                   | 0.954198              | 0.734186          |
| 342 | 2                    | 0.907593              | 0.701486          |
| 343 | 3                    | 0.905196              | 0.783763          |
| 344 | 4                    | 0.928291              | 0.704025          |

|     |    |          |          |
|-----|----|----------|----------|
| 345 | 5  | 0.928317 | 0.687075 |
| 346 | 6  | 0.935989 | 0.729997 |
| 347 | 7  | 0.941967 | 0.706889 |
| 348 | 8  | 0.944093 | 0.703112 |
| 349 | 9  | 0.940824 | 0.680161 |
| 350 | 10 | 0.947567 | 0.650219 |
| 351 | 11 | 0.949049 | 0.651602 |
| 352 | 12 | 0.948099 | 0.672234 |
| 353 | 13 | 0.947288 | 0.693176 |
| 354 | 14 | 0.950753 | 0.694404 |
| 355 | 15 | 0.949821 | 0.722994 |
| 356 | 16 | 0.947419 | 0.728967 |
| 357 | 17 | 0.949392 | 0.732462 |
| 358 | 18 | 0.950434 | 0.729622 |
| 359 | 19 | 0.953419 | 0.730807 |
| 360 | 20 | 0.954198 | 0.734186 |

[ ]:

# Notebook

January 18, 2024

## 1 File 31

```
[1]: import sys
from pathlib import Path
prediction_mode_path = Path("../module")
sys.path.append(prediction_mode_path.as_posix())
import models_creation as pred_model

import pandas as pd
import numpy as np

from sklearn.metrics import r2_score, mean_squared_error, mean_absolute_error
import math

import matplotlib.pyplot as plt
from sklearn.tree import plot_tree
#from sklearn import tree

from matplotlib import pyplot as plt

import joblib

from mordred import Calculator, descriptors
import mordred
from rdkit import Chem

import warnings
warnings.filterwarnings('ignore')
```

```
[2]: load_prepared_data = pd.read_excel('../Data/Kolchicyna_machine_learning.xlsx')
load_prepared_data = load_prepared_data.drop(columns=['Unnamed: 0'])
```

```
[3]: def is_morder_missing(x):
    return np.nan if type(x) == mordred.error.Missing or type(x) == mordred.
    ↪error.Error else x
```

```
[4]: to_prediction = pd.read_excel('../Data/
↳Proposed_structures_with_AI_colchicine_tanimoto_similarity_.xlsx')
mol_objs = [Chem.MolFromSmiles(smi) for smi in
↳to_prediction['AI_generated_SMILES']]

calculate_descriptors = False
if calculate_descriptors == True:
    calc = Calculator(descriptors, ignore_3D=True)
    molecular_descriptors = calc.pandas(mol_objs)
    molecular_descriptors['SMILES'] = to_prediction['AI_generated_SMILES']
    molecular_descriptors = molecular_descriptors.applymap(is_morder_missing)
    molecular_descriptors = molecular_descriptors.dropna(subset=['MDEO-12'])
    molecular_descriptors.to_excel('../Data/
↳New_structures_molecular_descriptors.xlsx')
else:
    molecular_descriptors = pd.read_excel('../Data/
↳New_structures_molecular_descriptors.xlsx')
```

```
[5]: molecular_descriptors.head()
```

```
[5]:
```

|   | Unnamed: 0 | ABC       | ABCGG     | nAcid | nBase | SpAbs_A   | SpMax_A  | \ |
|---|------------|-----------|-----------|-------|-------|-----------|----------|---|
| 0 | 0          | 23.120393 | 18.971182 | 0     | 1     | 39.868485 | 2.525781 |   |
| 1 | 1          | 23.120393 | 18.971182 | 0     | 1     | 39.868485 | 2.525781 |   |
| 2 | 2          | 23.827499 | 19.325995 | 0     | 1     | 41.234073 | 2.525784 |   |
| 3 | 3          | 25.908380 | 21.011762 | 0     | 1     | 44.265079 | 2.539061 |   |
| 4 | 4          | 23.948820 | 19.806455 | 0     | 1     | 40.972555 | 2.454223 |   |

  

|   | SpDiam_A | SpAD_A    | SpMAD_A  | ... | TSRW10    | MW         | AMW      | WPath | \ |
|---|----------|-----------|----------|-----|-----------|------------|----------|-------|---|
| 0 | 4.995962 | 39.868485 | 1.286080 | ... | 76.110947 | 429.226371 | 6.923006 | 2466  |   |
| 1 | 4.995962 | 39.868485 | 1.286080 | ... | 76.110947 | 426.251858 | 6.557721 | 2466  |   |
| 2 | 4.995966 | 41.234073 | 1.288565 | ... | 77.202427 | 440.267508 | 6.474522 | 2760  |   |
| 3 | 5.010823 | 44.265079 | 1.301914 | ... | 84.705631 | 465.237604 | 7.157502 | 3124  |   |
| 4 | 4.851643 | 40.972555 | 1.280392 | ... | 81.511277 | 439.221954 | 7.200360 | 2754  |   |

  

|   | WPol | Zagreb1 | Zagreb2 | mZagreb1  | mZagreb2 | \ |
|---|------|---------|---------|-----------|----------|---|
| 0 | 61   | 156     | 187     | 10.861111 | 7.388889 |   |
| 1 | 61   | 156     | 187     | 10.861111 | 7.388889 |   |
| 2 | 62   | 160     | 191     | 11.111111 | 7.638889 |   |
| 3 | 67   | 178     | 216     | 11.333333 | 7.916667 |   |
| 4 | 57   | 160     | 188     | 11.111111 | 7.555556 |   |

  

|   | SMILES                                                         |
|---|----------------------------------------------------------------|
| 0 | <chem>COC1=C2C3=CC=C(NC)C(=O)C=C3[C@H1](CCC2=CC(OC)=...</chem> |
| 1 | <chem>COC1=C2C3=CC=C(NC)C(=O)C=C3[C@H1](CCC2=CC(OC)=...</chem> |
| 2 | <chem>COC1=C2C3=CC=C(NC)C(=O)C=C3[C@H1](CCC2=CC(OC)=...</chem> |
| 3 | <chem>COC1=C2C3=CC=C(NC)C(=O)C=C3[C@H1](CCC2=CC(OC)=...</chem> |
| 4 | <chem>COC1=CC2=CC=C(NC)C(C=C2[C@H1](N3C=C(N=N3)CN)C...</chem>  |

[5 rows x 1615 columns]

```
[6]: molecular_descriptors.shape
```

```
[6]: (1289, 1615)
```

## 2 A549

```
[7]: target = 'A549'
data = load_prepared_data[list(load_prepared_data.columns)[0:-10]]
data[target] = load_prepared_data[load_prepared_data.columns[-5]]
data.head()
```

```
[7]:
```

|   | AATS0Z    | AATS0are | AATS0d   | AATS0dv  | AATS0i     | AATS0m    | AATS0p   | \ |
|---|-----------|----------|----------|----------|------------|-----------|----------|---|
| 0 | 25.090909 | 6.046518 | 3.109091 | 6.662626 | 160.775045 | 99.075564 | 1.555512 |   |
| 1 | 24.448276 | 6.008422 | 3.051724 | 6.386973 | 161.021674 | 96.473315 | 1.538471 |   |
| 2 | 23.868852 | 5.974074 | 3.000000 | 6.138434 | 161.244045 | 94.127025 | 1.523105 |   |
| 3 | 23.868852 | 5.974074 | 3.032787 | 6.171220 | 161.244045 | 94.127025 | 1.523105 |   |
| 4 | 23.343750 | 5.942945 | 2.953125 | 5.913194 | 161.445569 | 92.000700 | 1.509180 |   |

  

|   | AATS0pe  | AATS0s   | AATS0se  | ... | piPC10   | piPC2    | piPC3    | piPC4    | \ |
|---|----------|----------|----------|-----|----------|----------|----------|----------|---|
| 0 | 6.126680 | 3.435416 | 7.629859 | ... | 7.999655 | 4.266195 | 4.915408 | 5.516700 |   |
| 1 | 6.088791 | 3.330998 | 7.596891 | ... | 8.018726 | 4.280132 | 4.922714 | 5.520711 |   |
| 2 | 6.054630 | 3.236850 | 7.567166 | ... | 8.028799 | 4.293878 | 4.929967 | 5.524706 |   |
| 3 | 6.054630 | 3.257798 | 7.567166 | ... | 8.037440 | 4.307438 | 4.929967 | 5.524706 |   |
| 4 | 6.023670 | 3.151529 | 7.540228 | ... | 8.034892 | 4.307438 | 4.937168 | 5.528685 |   |

  

|   | piPC5    | piPC6    | piPC7    | piPC8    | piPC9    | A549     |
|---|----------|----------|----------|----------|----------|----------|
| 0 | 6.098566 | 6.595759 | 6.979116 | 7.337313 | 7.681445 | 7.966576 |
| 1 | 6.103048 | 6.601209 | 6.985613 | 7.349442 | 7.695531 | 7.935542 |
| 2 | 6.105281 | 6.603923 | 6.989306 | 7.353932 | 7.704023 | 7.962574 |
| 3 | 6.107510 | 6.606629 | 6.992068 | 7.361425 | 7.709420 | 7.978811 |
| 4 | 6.107510 | 6.605277 | 6.991148 | 7.356489 | 7.707175 | 7.048177 |

[5 rows x 1212 columns]

```
[8]: ## create best model and make predictions to selected structures with
      ↪retransformation
```

```
[9]: ## The best model is: Random Forest (correlation_threshold = 0.51, 5 features,
      ↪17 estimators, random_state=15)
```

```
[11]: model, train_r2_, test_r2_, hist1, hist2, target_column_name,
      ↪training_data_RMSE, test_data_RMSE = pred_model.
      ↪prepare_data_and_create_model(molecular_descriptors_df=data,
```



```

↪ correlation_threshold=0.51,
↪
↪ standardization=False,
↪
↪ model_type='RandomForestRegressor',
↪
↪ n_estimators=17,
↪
↪ target_column_name = target,
↪
↪ random_state=15,
↪
↪ train_test_split=True,
↪
↪ verbose=True)
print("R^2 score: " + str(r2_score(data[target], model.
↪ predict(data[hist2['molecular descriptor name']]))))
print("Mean squared error: "+str(mean_squared_error(data[target], model.
↪ predict(data[hist2['molecular descriptor name']]))))
print('Mean absolute error: ' + str(mean_absolute_error(data[target], model.
↪ predict(data[hist2['molecular descriptor name']]))))
print("Root Mean Square Error: " + str(math.
↪ sqrt(mean_squared_error(data[target], model.predict(data[hist2['molecular_
↪ descriptor name']])))))

```

I am not doing standardization...

|     | molecular descriptor name | corr_value | absolute correlation value |
|-----|---------------------------|------------|----------------------------|
| 0   | AATS0Z                    | -0.022797  | 0.022797                   |
| 1   | AATS0are                  | -0.139064  | 0.139064                   |
| 2   | AATS0d                    | 0.027592   | 0.027592                   |
| 3   | AATS0dv                   | -0.136049  | 0.136049                   |
| 4   | AATS0i                    | 0.168958   | 0.168958                   |
| 226 | AMID_0                    | -0.557717  | 0.557717                   |

|      |                           |            |                            |
|------|---------------------------|------------|----------------------------|
| 505  | EState_VSA5               | -0.534748  | 0.534748                   |
| 791  | MDEO-12                   | -0.555724  | 0.555724                   |
| 921  | SaasC                     | 0.513071   | 0.513071                   |
| 1091 | VSA_EState5               | 0.526082   | 0.526082                   |
|      | molecular descriptor name | corr_value | absolute correlation value |
| 226  | AMID_0                    | -0.557717  | 0.557717                   |
| 505  | EState_VSA5               | -0.534748  | 0.534748                   |
| 791  | MDEO-12                   | -0.555724  | 0.555724                   |
| 921  | SaasC                     | 0.513071   | 0.513071                   |
| 1091 | VSA_EState5               | 0.526082   | 0.526082                   |

The model used is: RandomForest...

Return the coefficient of determination of the prediction:

0.7431506499986544

R<sup>2</sup> score: 0.9227368657388829

Correlation coefficient: 0.960591935079034

Test data - unseen during training:

R<sup>2</sup> score: 0.7431506499986544

Correlation coefficient: 0.8620618597285548

[7.97245978 5.83683289 7.16157908 7.97048418 8.00084813 7.68188043  
8.04390248 7.33278952 8.03891061 7.50094682 8.25677164 8.11146208  
8.17909706 7.8550048 7.77872021 7.96616182 5.9492495 5.60331737]

102 7.920819  
38 6.019997  
8 5.996841  
109 7.886057  
11 7.962574  
51 7.886057  
88 8.075721  
21 7.325139  
82 7.978811  
98 7.481486  
58 7.677781  
64 8.537602  
74 8.142668  
103 8.397940  
91 8.958607  
43 7.823909  
25 4.886525  
30 6.009661

Name: A549, dtype: float64

Training Root Mean Square Error: 0.2594924364766403

Testing Root Mean Square Error: 0.5253556041537444

R<sup>2</sup> score: 0.8906447986609566

Mean squared error: 0.09863565252265759

Mean absolute error: 0.20534614429271014

Root Mean Square Error: 0.31406313461254504

```
[12]: # save
joblib.dump(model, "Random_forest/random_forest_model_17_estimators_A549.
↳joblib")
```

```
[12]: ['Random_forest/random_forest_model_17_estimators_A549.joblib']
```

```
[13]: for x, decision_tree in enumerate(model.estimators_):
plt.figure(figsize=(10,8), dpi=150)
plot_tree(decision_tree, feature_names=list(hist2['molecular descriptor_
↳name']),
filled=True)
plt.savefig('Random_forest/random_forest_17_'+str(x)+'_model_A549.
↳pdf',bbox_inches = "tight")
```

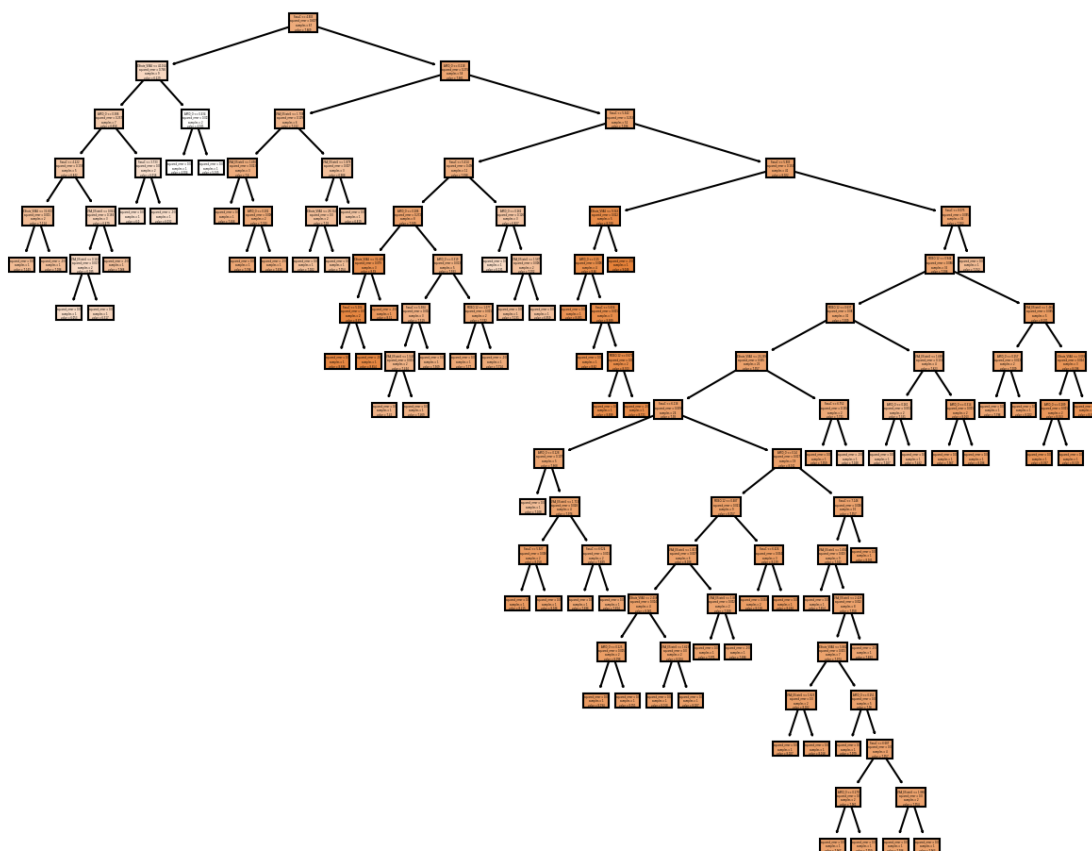

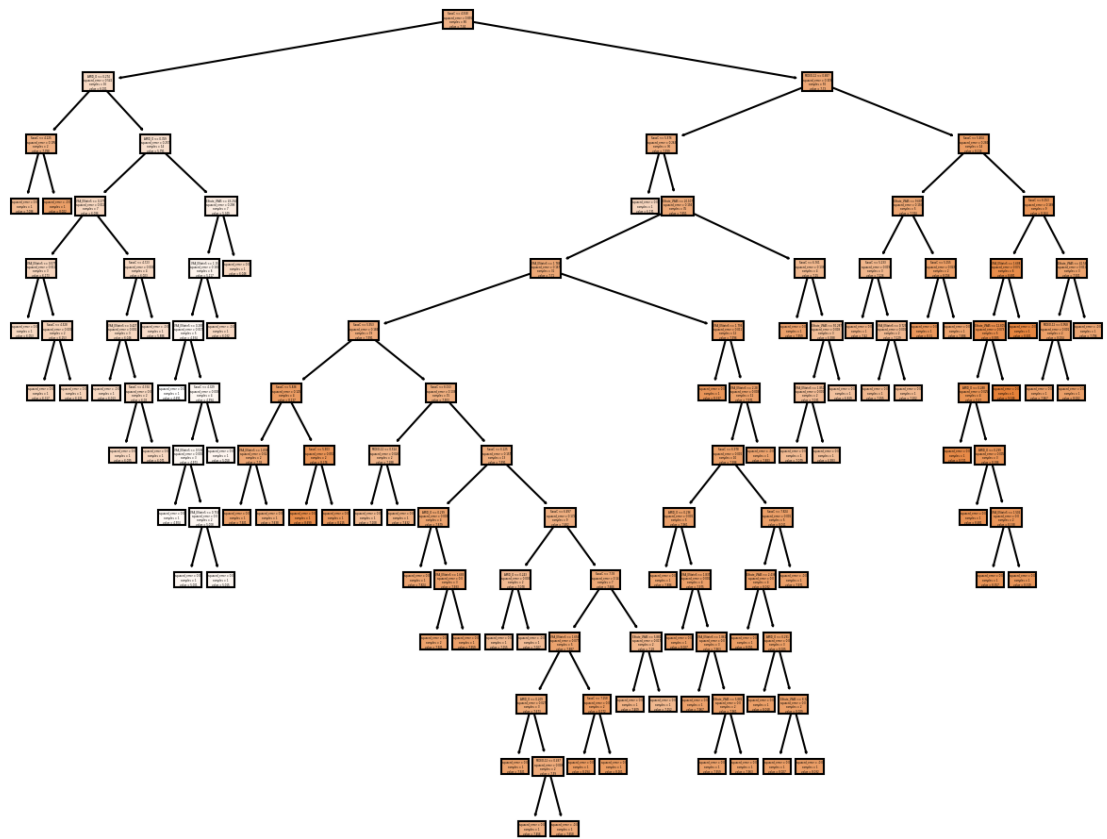

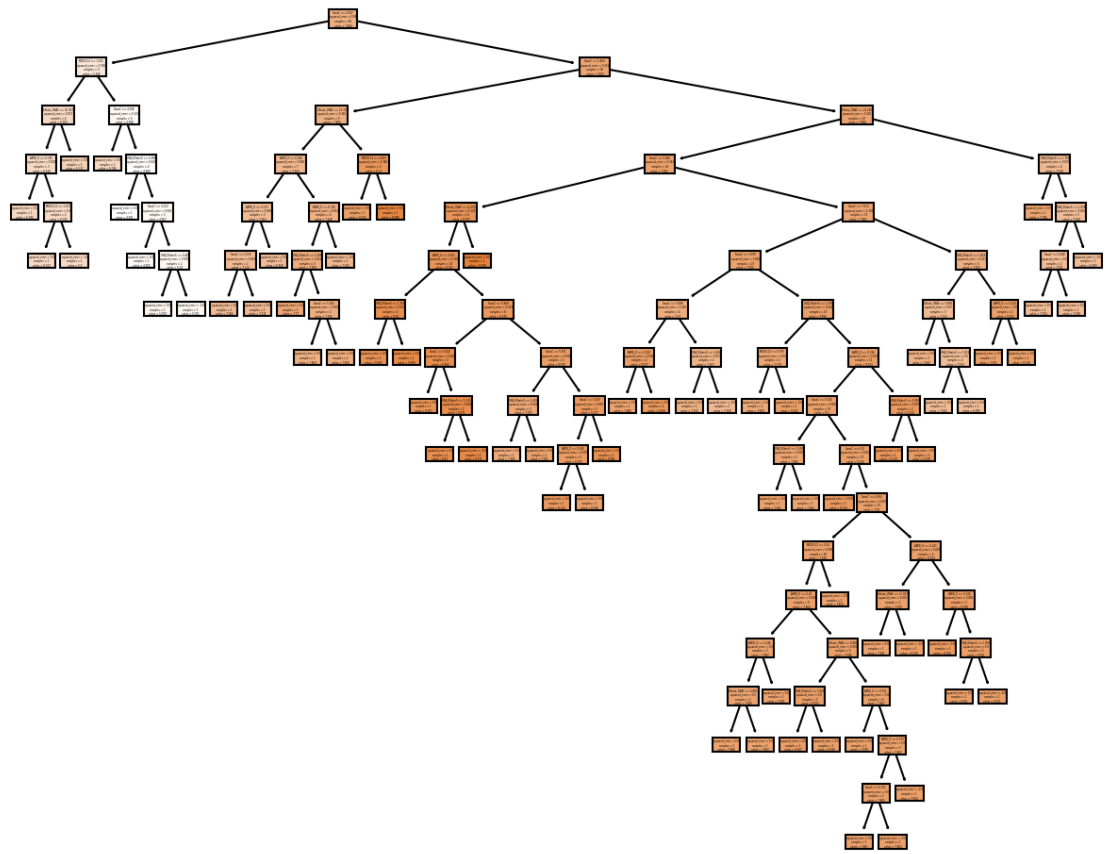

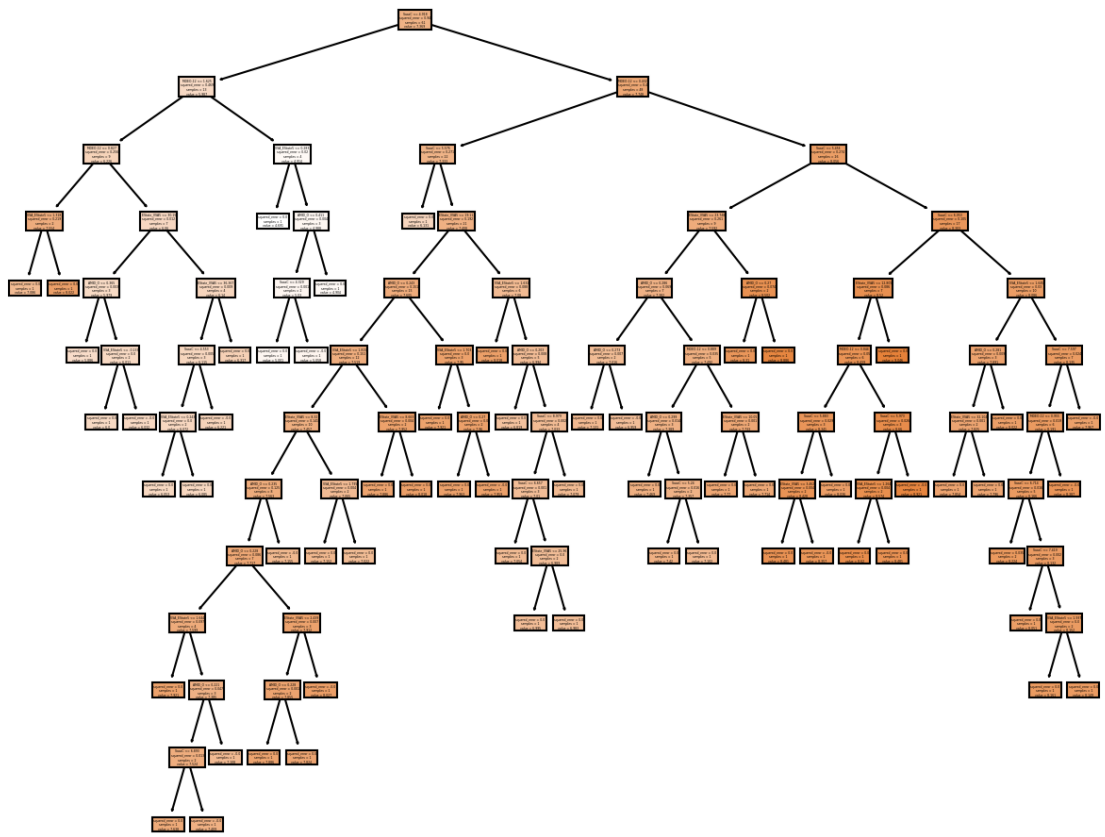

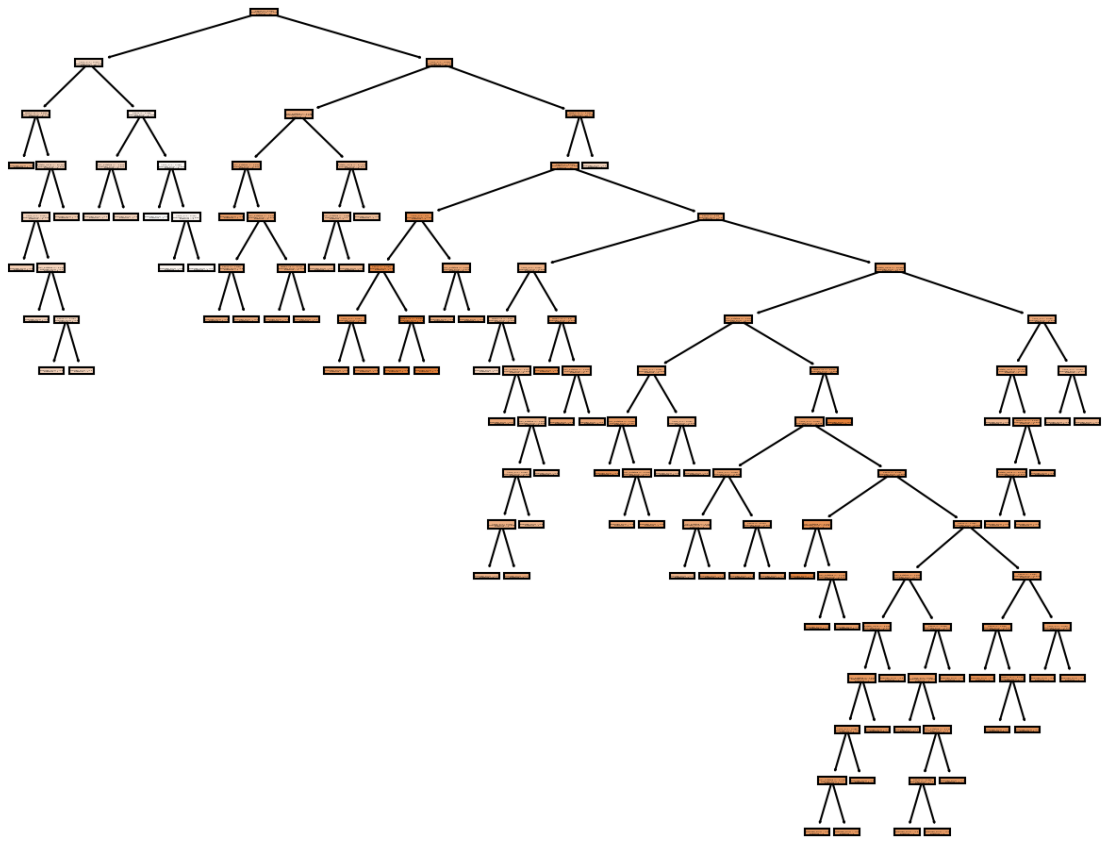

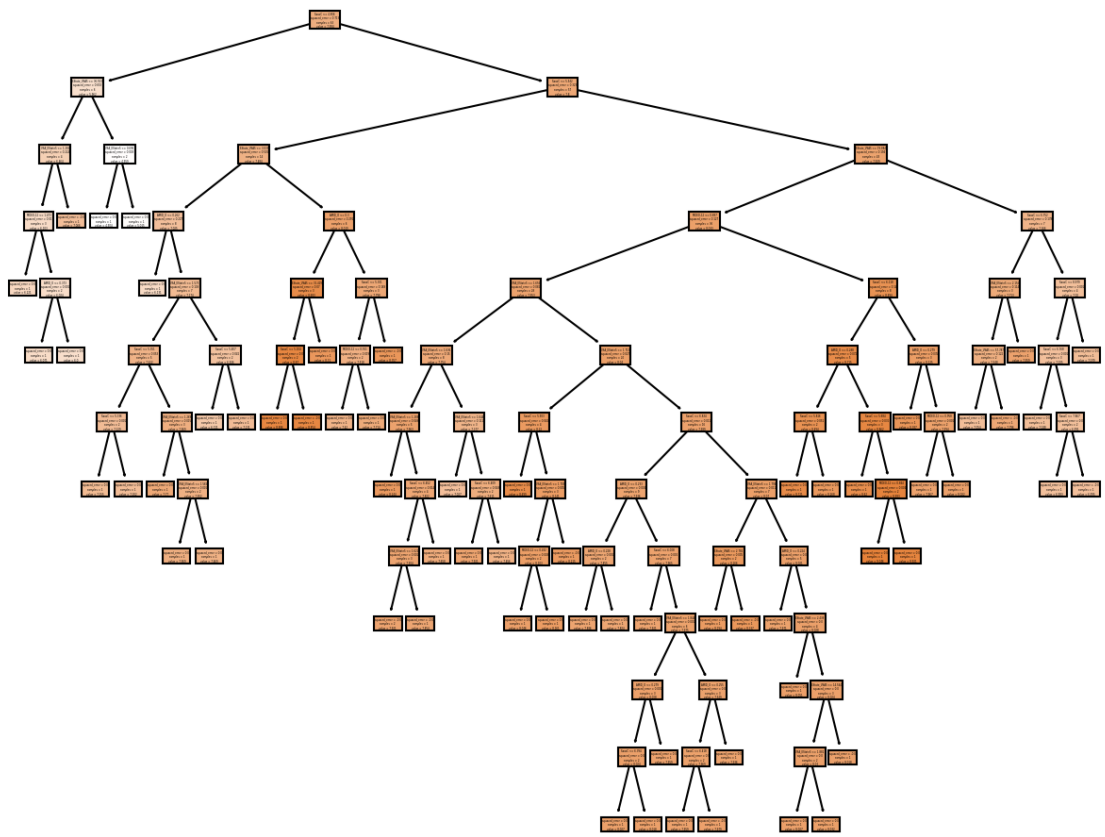



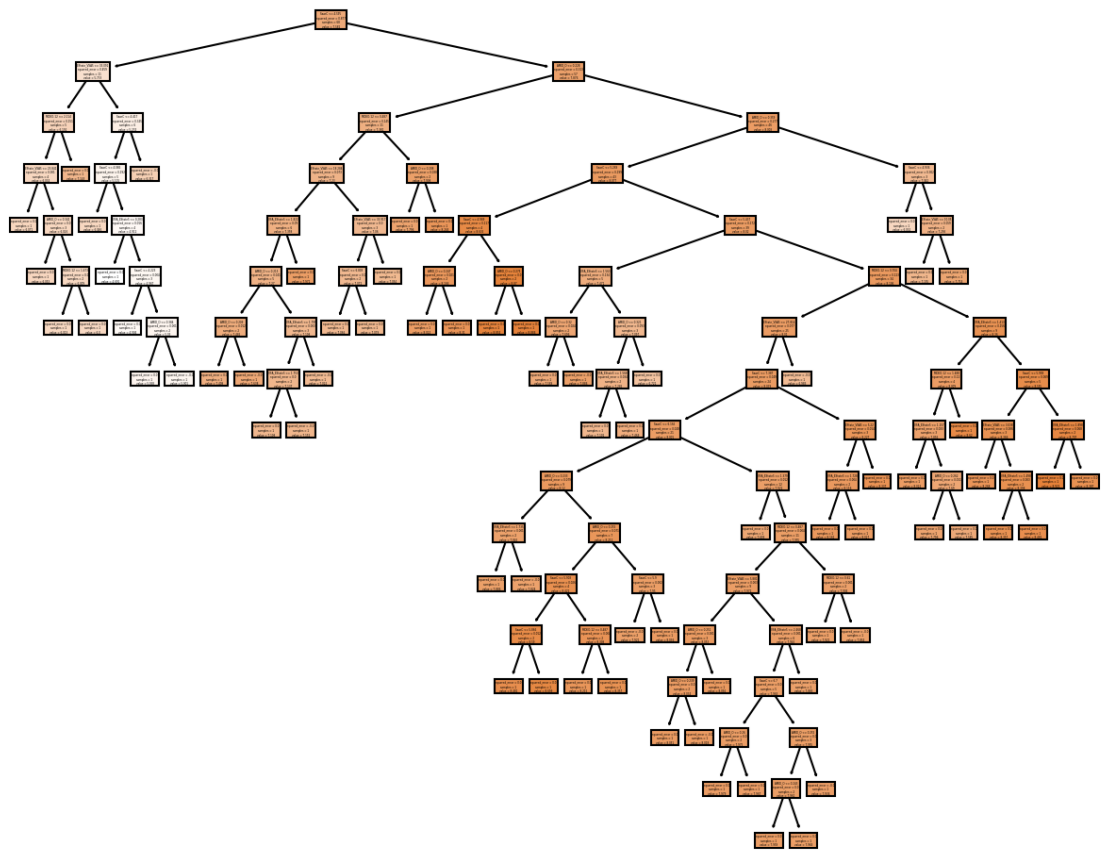

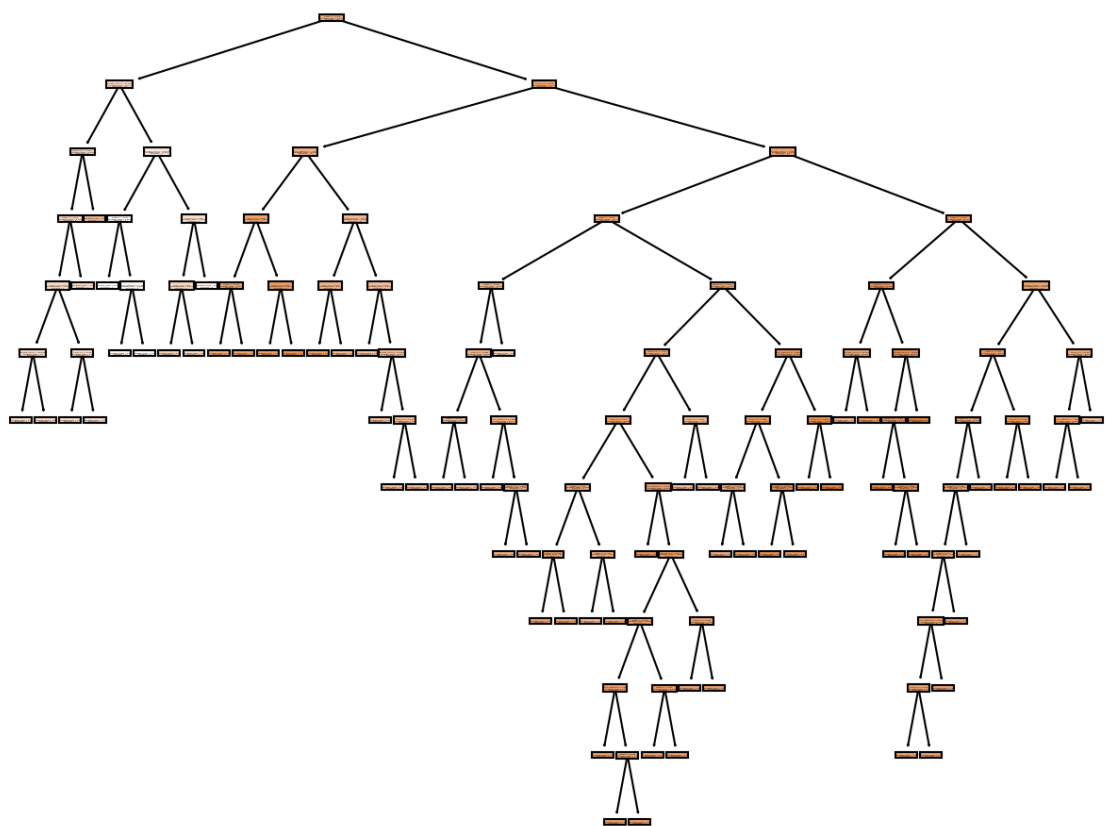

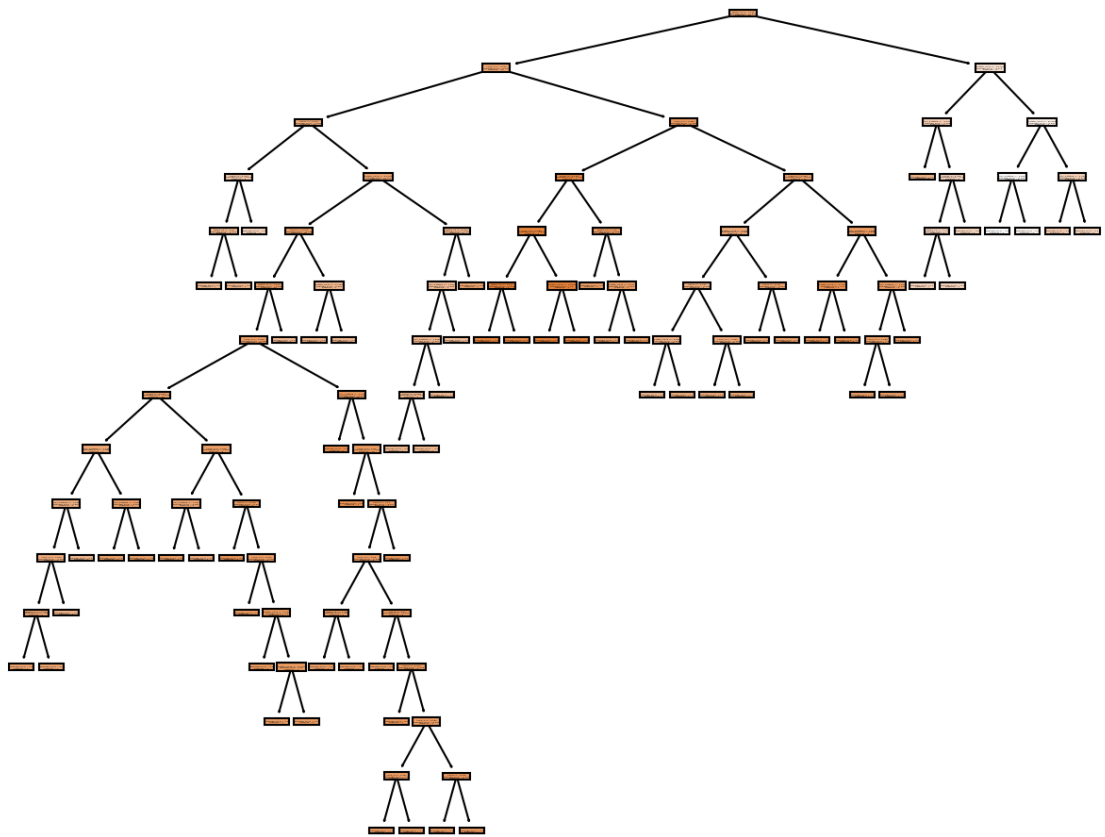

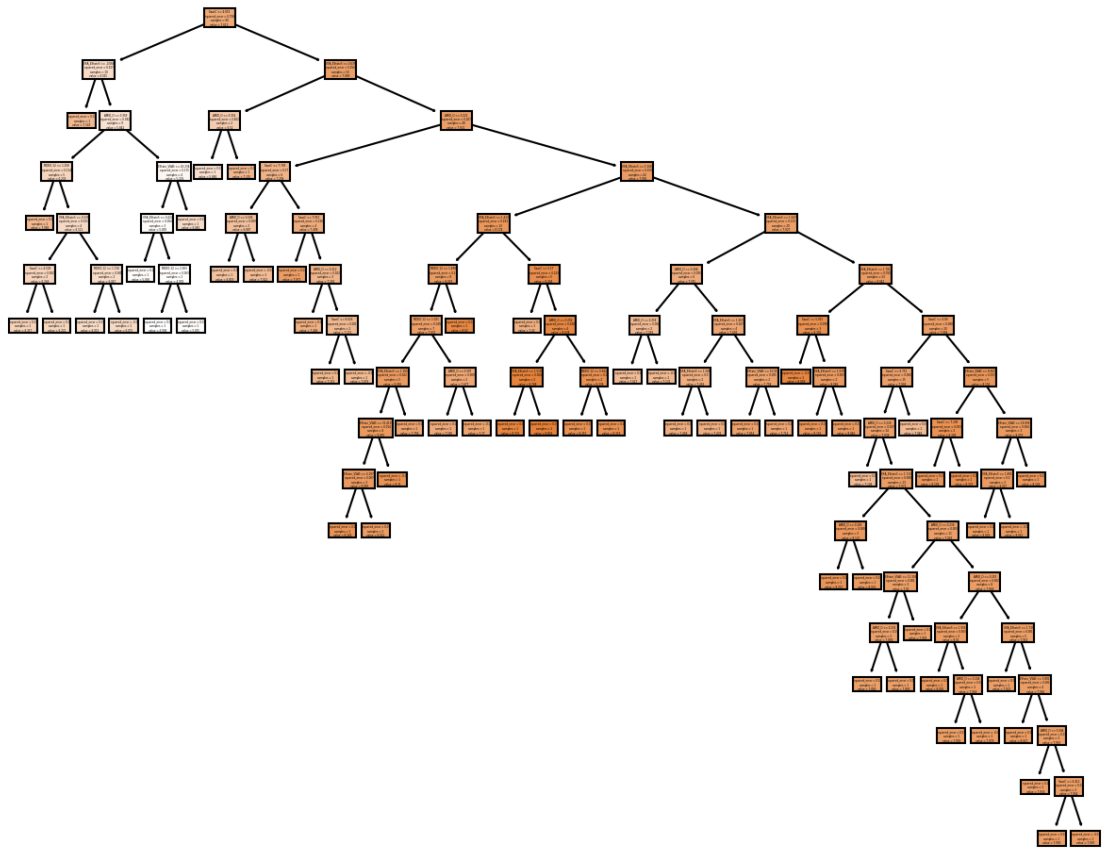

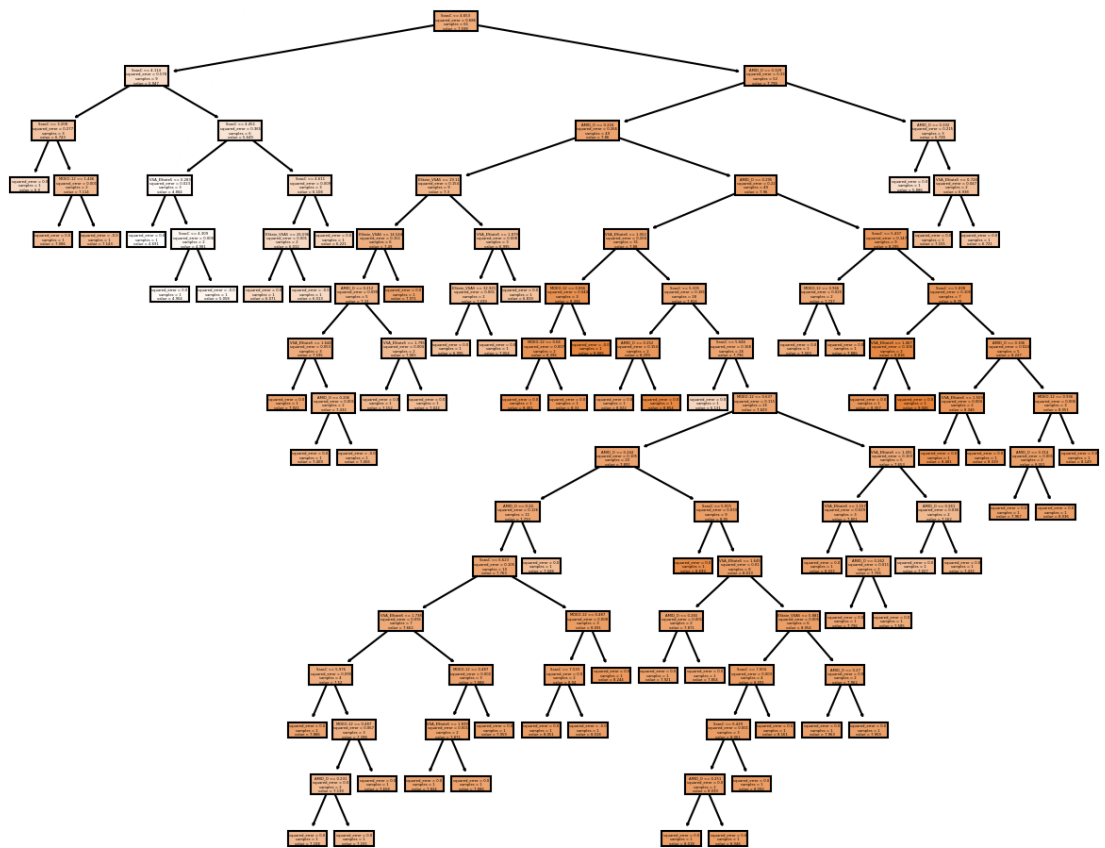

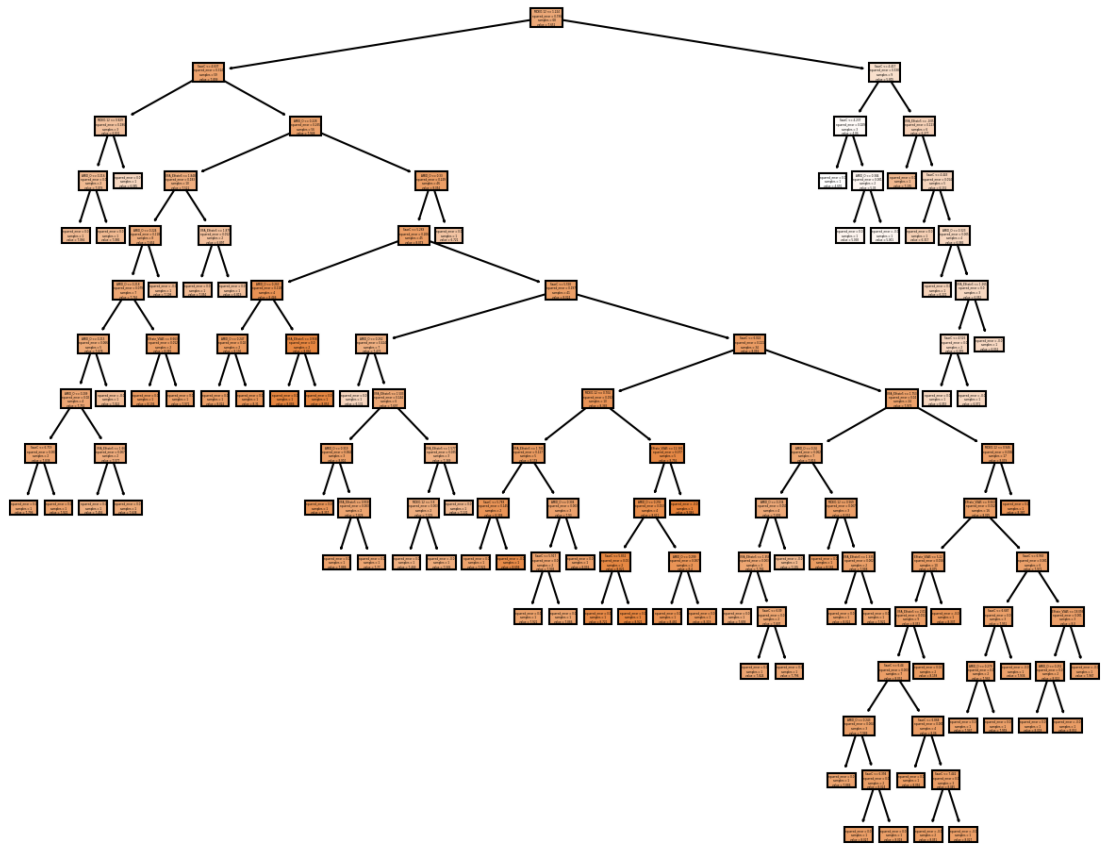

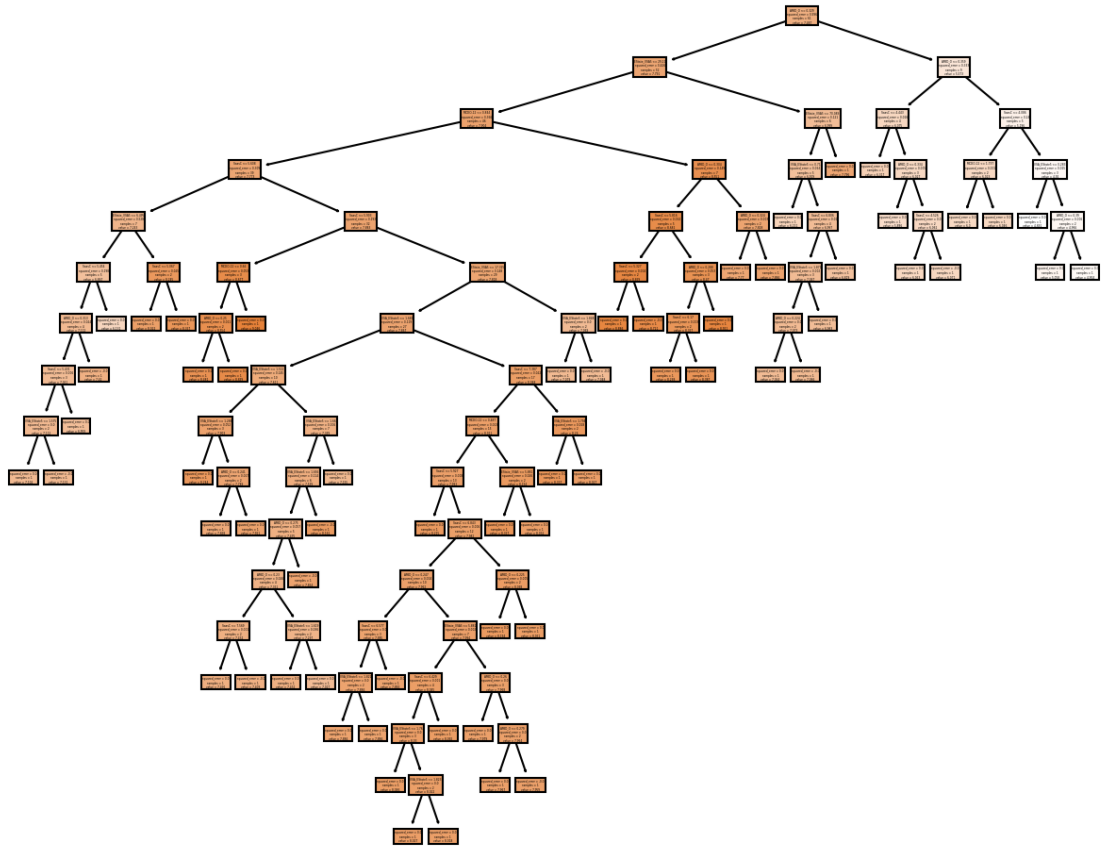

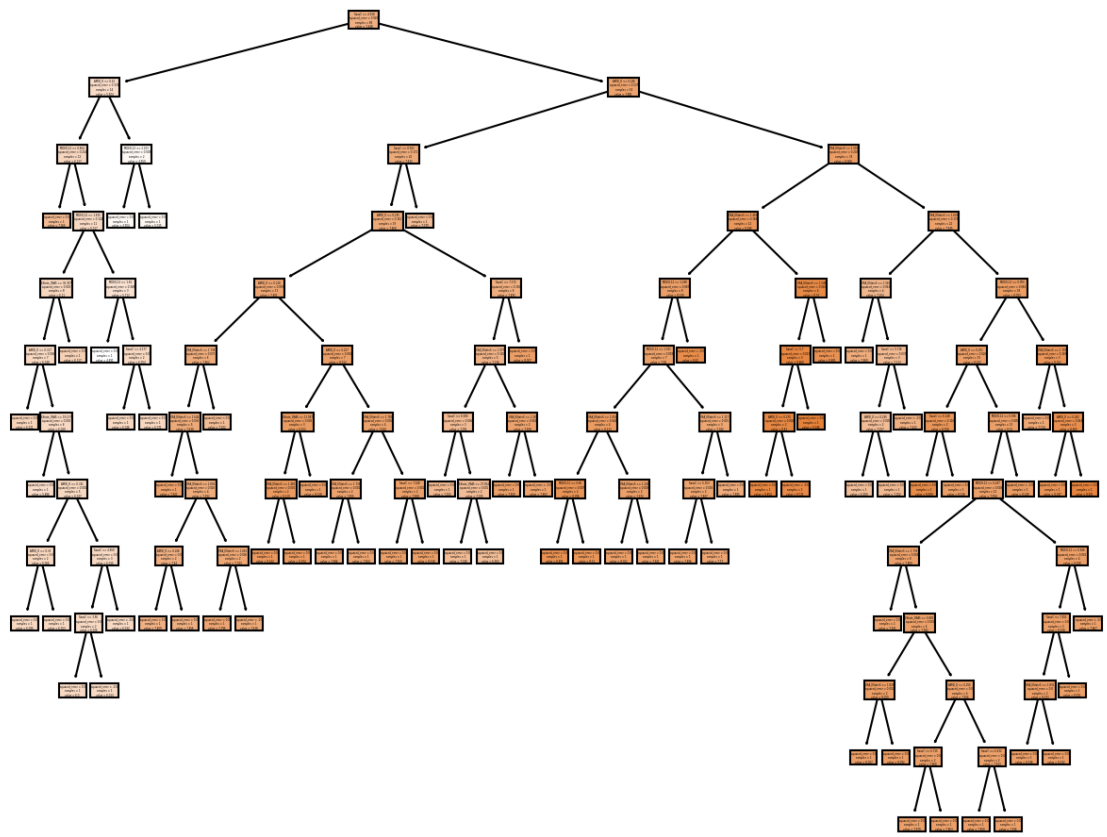



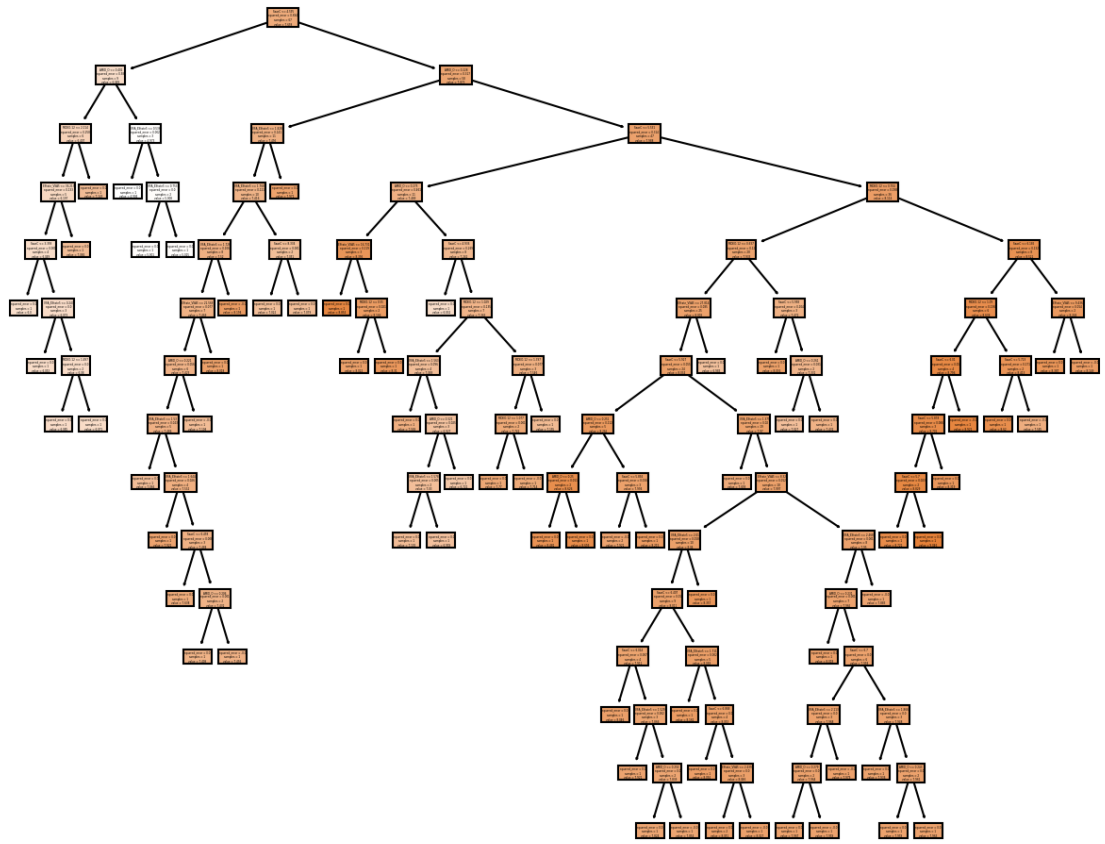

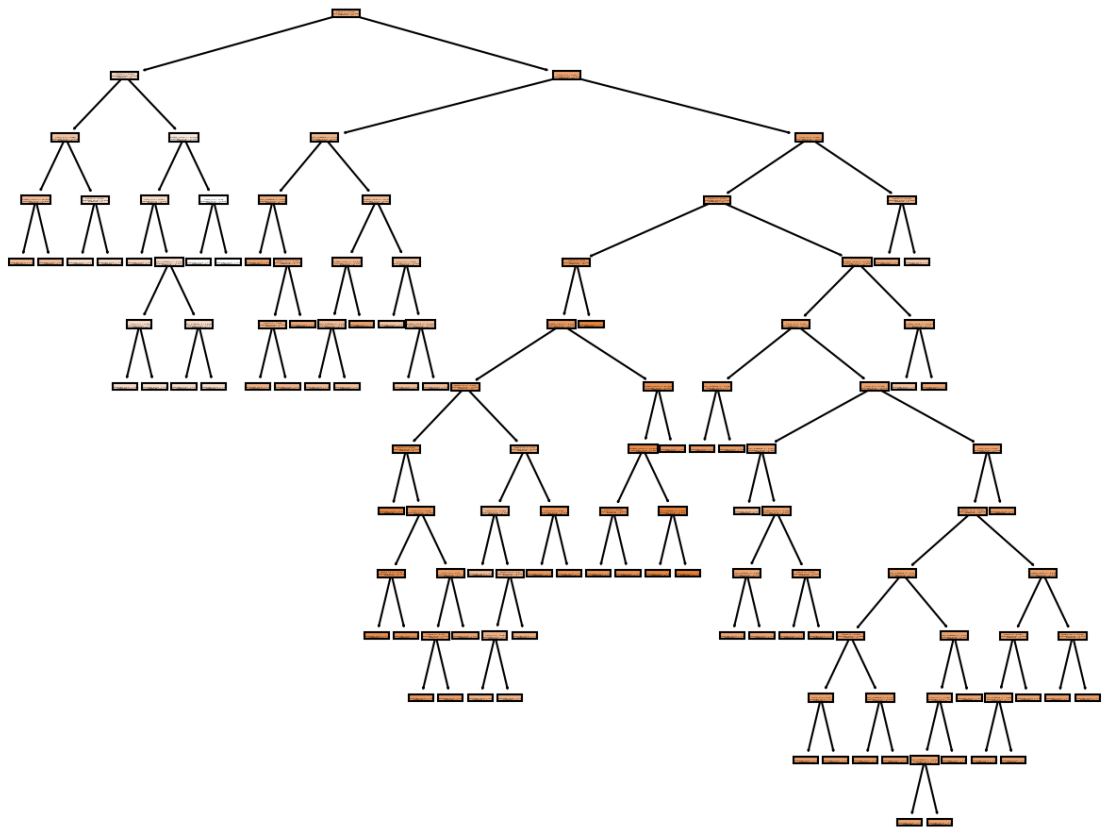

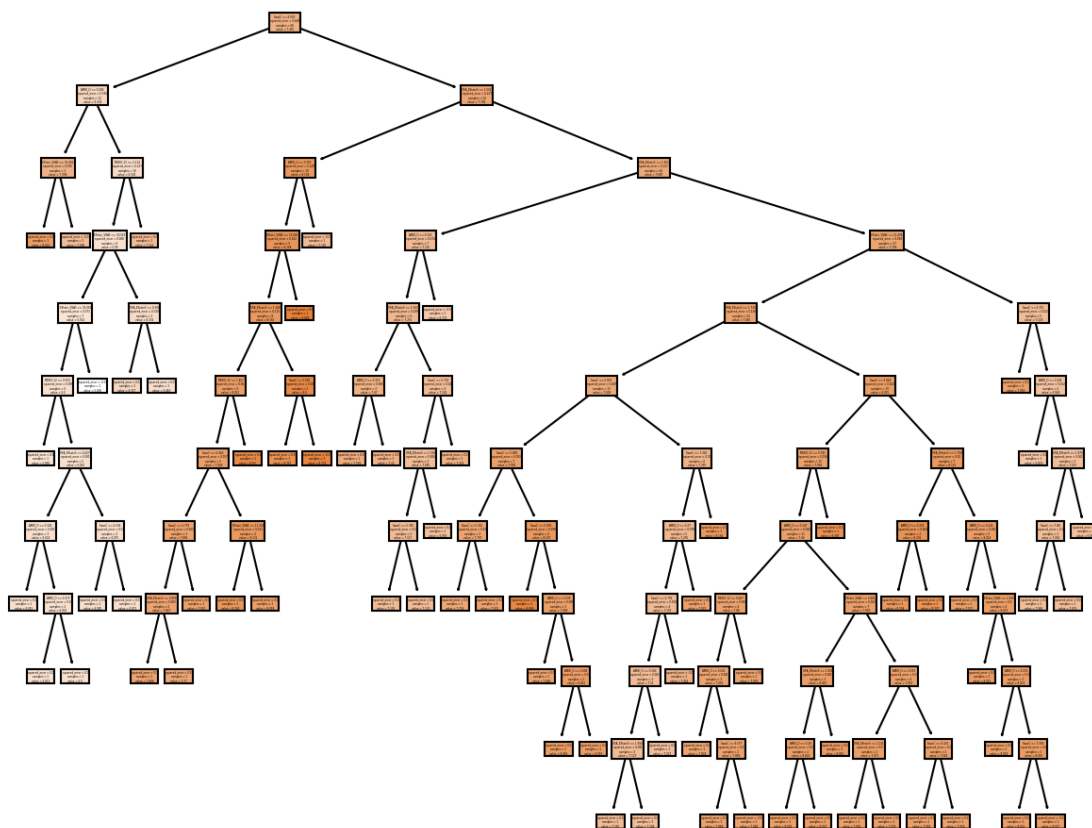

```
[14]: hist2
```

```
[14]:
```

|      | molecular descriptor name | corr_value | absolute correlation value |
|------|---------------------------|------------|----------------------------|
| 226  | AMID_0                    | -0.557717  | 0.557717                   |
| 505  | EState_VSA5               | -0.534748  | 0.534748                   |
| 791  | MDEO-12                   | -0.555724  | 0.555724                   |
| 921  | SaasC                     | 0.513071   | 0.513071                   |
| 1091 | VSA_EState5               | 0.526082   | 0.526082                   |

```
[15]: predicted_activity = model.predict(molecular_descriptors[hist2['molecular_↵
↵descriptor name']])
```

```
[16]: len(predicted_activity)
```

```
[16]: 1289
```

```
[17]: smiles = molecular_descriptors['SMILES'].to_list()
save_to_df = pd.DataFrame(data=smiles, columns=['SMILES'])
```

```
[18]: save_to_df['Predicted A549'] = predicted_activity
```

```
[19]: save_to_df.head()
```

```
[19]:
```

|   | SMILES                                                         | Predicted A549 |
|---|----------------------------------------------------------------|----------------|
| 0 | <chem>COC1=C2C3=CC=C(NC)C(=O)C=C3[C@H1](CCC2=CC(OC)=...</chem> | 8.078406       |
| 1 | <chem>COC1=C2C3=CC=C(NC)C(=O)C=C3[C@H1](CCC2=CC(OC)=...</chem> | 7.867157       |
| 2 | <chem>COC1=C2C3=CC=C(NC)C(=O)C=C3[C@H1](CCC2=CC(OC)=...</chem> | 7.785028       |
| 3 | <chem>COC1=C2C3=CC=C(NC)C(=O)C=C3[C@H1](CCC2=CC(OC)=...</chem> | 7.742135       |
| 4 | <chem>COC1=CC2=CC=C(NC)C(C=C2[C@@H1](N3C=C(N=N3)CN)C...</chem> | 6.789342       |

### 3 BALB\_3T3

```
[20]: target = 'BALB/3T3'
data = load_prepared_data[list(load_prepared_data.columns)[0:-10]]
data[target] = load_prepared_data[load_prepared_data.columns[-1]]
data.head()
```

```
[20]:
```

|   | AATS0Z    | AATS0are | AATS0d   | AATS0dv  | AATS0i     | AATS0m    | AATS0p \ |
|---|-----------|----------|----------|----------|------------|-----------|----------|
| 0 | 25.090909 | 6.046518 | 3.109091 | 6.662626 | 160.775045 | 99.075564 | 1.555512 |
| 1 | 24.448276 | 6.008422 | 3.051724 | 6.386973 | 161.021674 | 96.473315 | 1.538471 |
| 2 | 23.868852 | 5.974074 | 3.000000 | 6.138434 | 161.244045 | 94.127025 | 1.523105 |
| 3 | 23.868852 | 5.974074 | 3.032787 | 6.171220 | 161.244045 | 94.127025 | 1.523105 |
| 4 | 23.343750 | 5.942945 | 2.953125 | 5.913194 | 161.445569 | 92.000700 | 1.509180 |

  

|   | AATS0pe  | AATS0s   | AATS0se  | ... | piPC10   | piPC2    | piPC3    | piPC4 \  |
|---|----------|----------|----------|-----|----------|----------|----------|----------|
| 0 | 6.126680 | 3.435416 | 7.629859 | ... | 7.999655 | 4.266195 | 4.915408 | 5.516700 |
| 1 | 6.088791 | 3.330998 | 7.596891 | ... | 8.018726 | 4.280132 | 4.922714 | 5.520711 |
| 2 | 6.054630 | 3.236850 | 7.567166 | ... | 8.028799 | 4.293878 | 4.929967 | 5.524706 |
| 3 | 6.054630 | 3.257798 | 7.567166 | ... | 8.037440 | 4.307438 | 4.929967 | 5.524706 |
| 4 | 6.023670 | 3.151529 | 7.540228 | ... | 8.034892 | 4.307438 | 4.937168 | 5.528685 |

  

|   | piPC5    | piPC6    | piPC7    | piPC8    | piPC9    | BALB/3T3 |
|---|----------|----------|----------|----------|----------|----------|
| 0 | 6.098566 | 6.595759 | 6.979116 | 7.337313 | 7.681445 | 7.991400 |
| 1 | 6.103048 | 6.601209 | 6.985613 | 7.349442 | 7.695531 | 7.844664 |
| 2 | 6.105281 | 6.603923 | 6.989306 | 7.353932 | 7.704023 | 7.931814 |
| 3 | 6.107510 | 6.606629 | 6.992068 | 7.361425 | 7.709420 | 7.958607 |
| 4 | 6.107510 | 6.605277 | 6.991148 | 7.356489 | 7.707175 | 7.002614 |

[5 rows x 1212 columns]

```
[21]: ## The best model is: Random Forest (correlation_threshold = 0.51, 6 features, 19 estimators, random_state=15)
```

```
[22]: model, train_r2_, test_r2_, hist1, hist2, target_column_name, training_data_RMSE, test_data_RMSE = pred_model.prepare_data_and_create_model(molecular_descriptors_df=data,
```

```

↪ correlation_threshold=0.51,
↪
↪ standardization=False,
↪
↪ model_type='RandomForestRegressor',
↪
↪ n_estimators=19,
↪
↪ target_column_name = target,
↪
↪ random_state=15,
↪
↪ train_test_split=True,
↪
↪ verbose=True)
print("R^2 score: " + str(r2_score(data[target], model.
↪ predict(data[hist2['molecular descriptor name']]))))
print("Mean squared error: "+str(mean_squared_error(data[target], model.
↪ predict(data[hist2['molecular descriptor name']]))))
print('Mean absolute error: ' + str(mean_absolute_error(data[target], model.
↪ predict(data[hist2['molecular descriptor name']]))))
print("Root Mean Square Error: " + str(math.
↪ sqrt(mean_squared_error(data[target], model.predict(data[hist2['molecular_
↪ descriptor name']])))))

```

I am not doing standardization...

|     | molecular descriptor name |            |                            |
|-----|---------------------------|------------|----------------------------|
| 0   | AATS0Z                    |            |                            |
| 1   | AATS0are                  |            |                            |
| 2   | AATS0d                    |            |                            |
| 3   | AATS0dv                   |            |                            |
| 4   | AATS0i                    |            |                            |
|     | molecular descriptor name | corr_value |                            |
| 0   | AATS0Z                    | -0.020817  |                            |
| 1   | AATS0are                  | -0.148257  |                            |
| 2   | AATS0d                    | 0.022999   |                            |
| 3   | AATS0dv                   | -0.137980  |                            |
| 4   | AATS0i                    | 0.133257   |                            |
|     | molecular descriptor name | corr_value | absolute correlation value |
| 0   | AATS0Z                    | -0.020817  | 0.020817                   |
| 1   | AATS0are                  | -0.148257  | 0.148257                   |
| 2   | AATS0d                    | 0.022999   | 0.022999                   |
| 3   | AATS0dv                   | -0.137980  | 0.137980                   |
| 4   | AATS0i                    | 0.133257   | 0.133257                   |
|     | molecular descriptor name | corr_value | absolute correlation value |
| 226 | AMID_0                    | -0.546843  | 0.546843                   |

|     |                           |            |                            |
|-----|---------------------------|------------|----------------------------|
| 505 | EState_VSA5               | -0.588780  | 0.588780                   |
| 556 | GATS2c                    | 0.511671   | 0.511671                   |
| 791 | MDEO-12                   | -0.582747  | 0.582747                   |
| 851 | NdssC                     | -0.526783  | 0.526783                   |
|     | molecular descriptor name | corr_value | absolute correlation value |
| 226 | AMID_O                    | -0.546843  | 0.546843                   |
| 505 | EState_VSA5               | -0.588780  | 0.588780                   |
| 556 | GATS2c                    | 0.511671   | 0.511671                   |
| 791 | MDEO-12                   | -0.582747  | 0.582747                   |
| 851 | NdssC                     | -0.526783  | 0.526783                   |

The model used is: RandomForest...

Return the coefficient of determination of the prediction:

0.7470132420088307

R<sup>2</sup> score: 0.9324873059163808

Correlation coefficient: 0.9656538230216772

Test data - unseen during training:

R<sup>2</sup> score: 0.7470132420088307

Correlation coefficient: 0.8642992780332693

[7.8032879 5.96743537 7.05720098 7.99770833 8.01718256 7.37593994  
7.99139143 7.21584713 8.01638597 7.67277552 7.18454636 7.91178639  
7.95499438 7.90669765 7.43673091 7.92913317 5.9970933 5.56800923]

102 7.698970  
38 5.986741  
8 5.984515  
109 7.886057  
11 7.962574  
51 7.698970  
88 8.229148  
21 7.298432  
82 8.065502  
98 7.376751  
58 7.602060  
64 8.060481  
74 7.853872  
103 7.853872  
91 8.346787  
43 7.619789  
25 4.989276  
30 6.085657

Name: BALB/3T3, dtype: float64

Training Root Mean Square Error: 0.22547718186980922

Testing Root Mean Square Error: 0.46260702873007903

R<sup>2</sup> score: 0.9018620203956247

Mean squared error: 0.07531475506692918

Mean absolute error: 0.18296175995878303

Root Mean Square Error: 0.2744353385898565

```
[23]: # save
joblib.dump(model, "Random_forest/random_forest_model_19_estimators_BALB_3T3.
↪joblib")
```

```
[23]: ['Random_forest/random_forest_model_19_estimators_BALB_3T3.joblib']
```

```
[24]: for x, decision_tree in enumerate(model.estimators_):
plt.figure(figsize=(10,8), dpi=150)
plot_tree(decision_tree, feature_names=list(hist2['molecular descriptor_
↪name']),
filled=True)
plt.savefig('Random_forest/random_forest_19_'+str(x)+'_model_BALB_3T3.
↪pdf',bbox_inches = "tight")
```

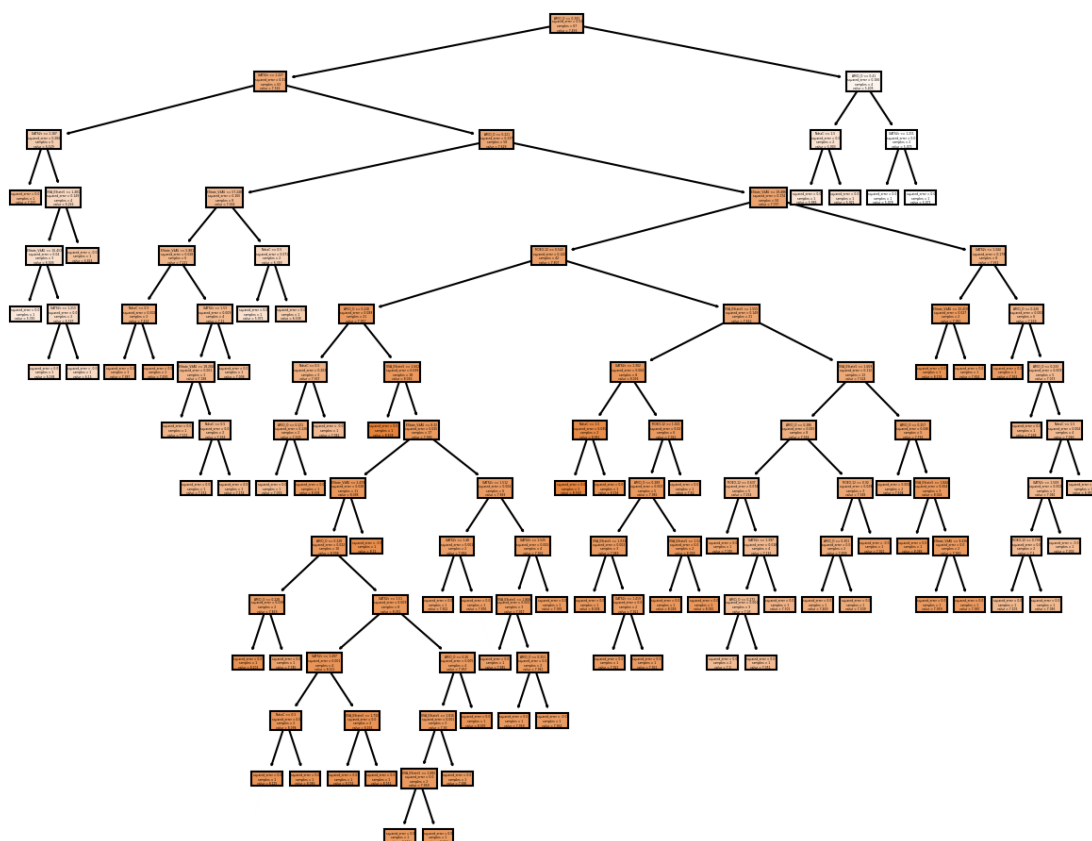

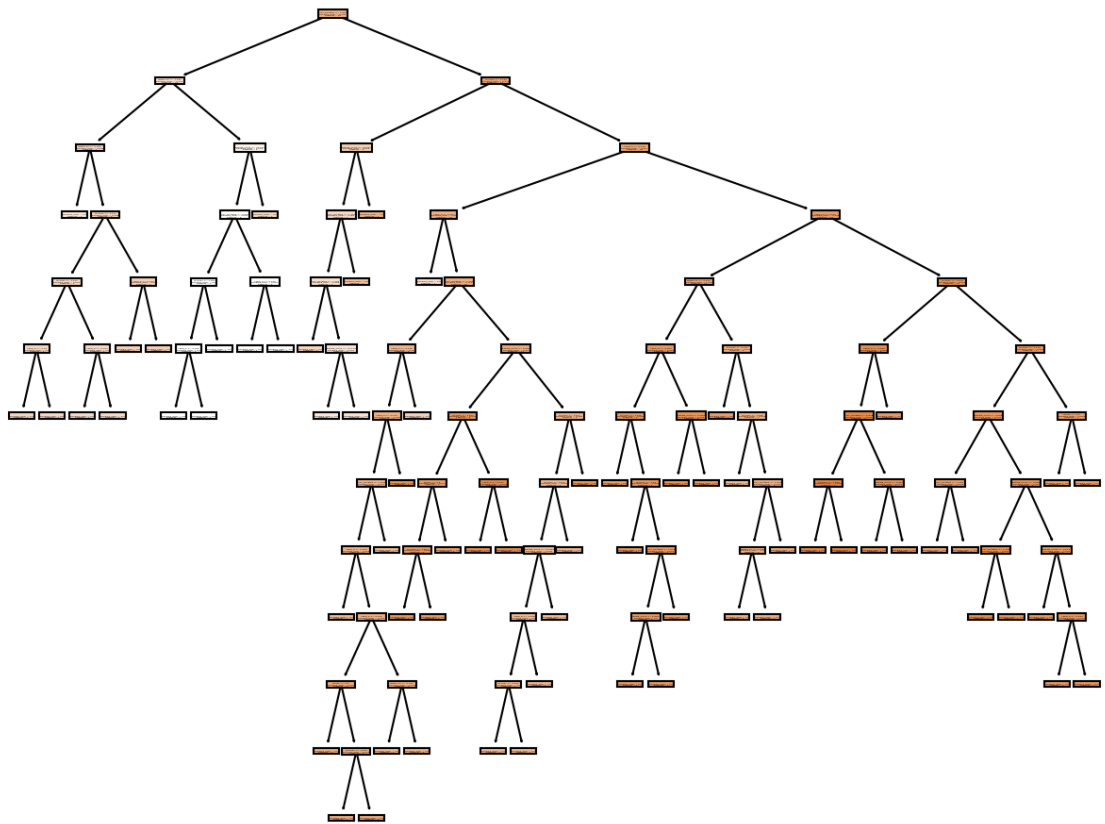



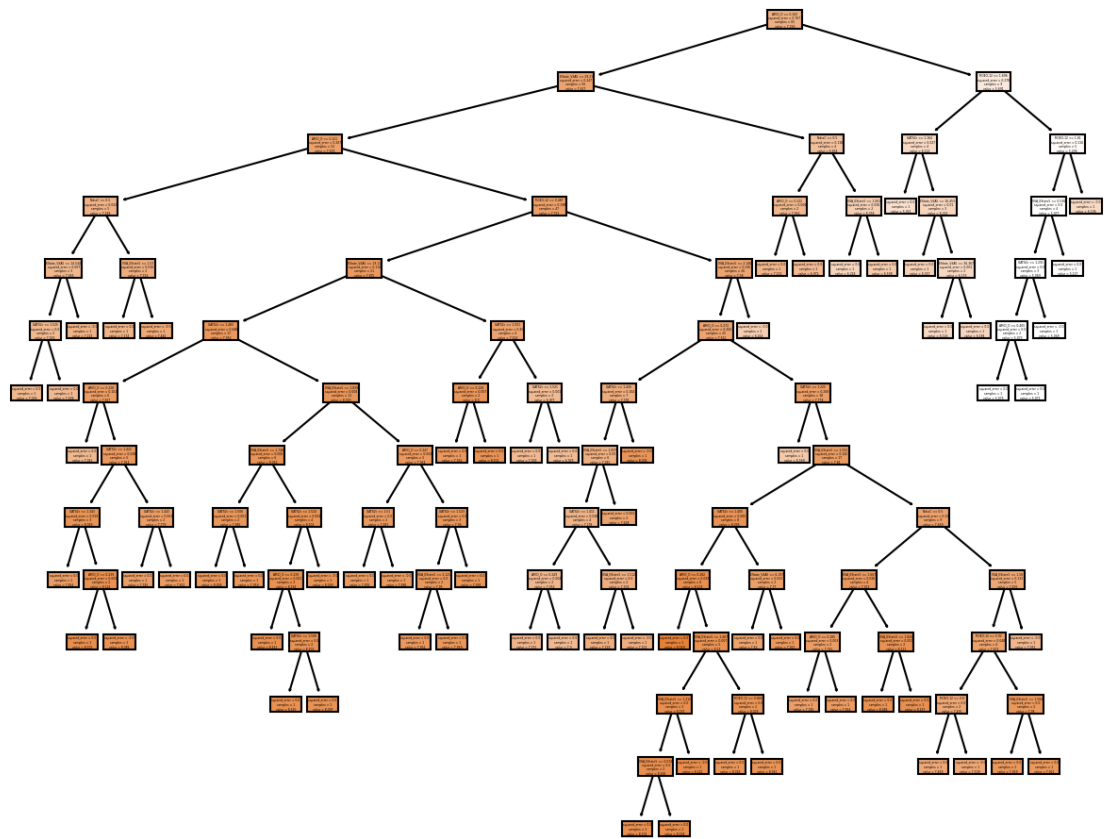

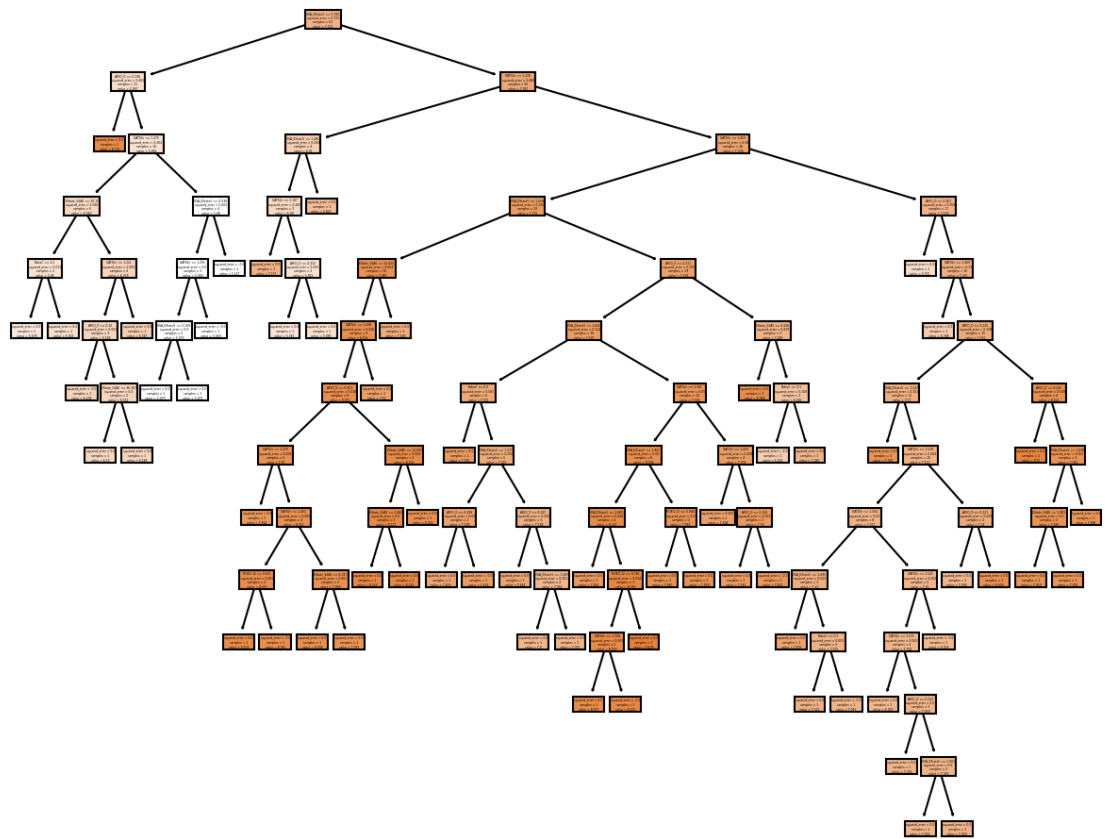

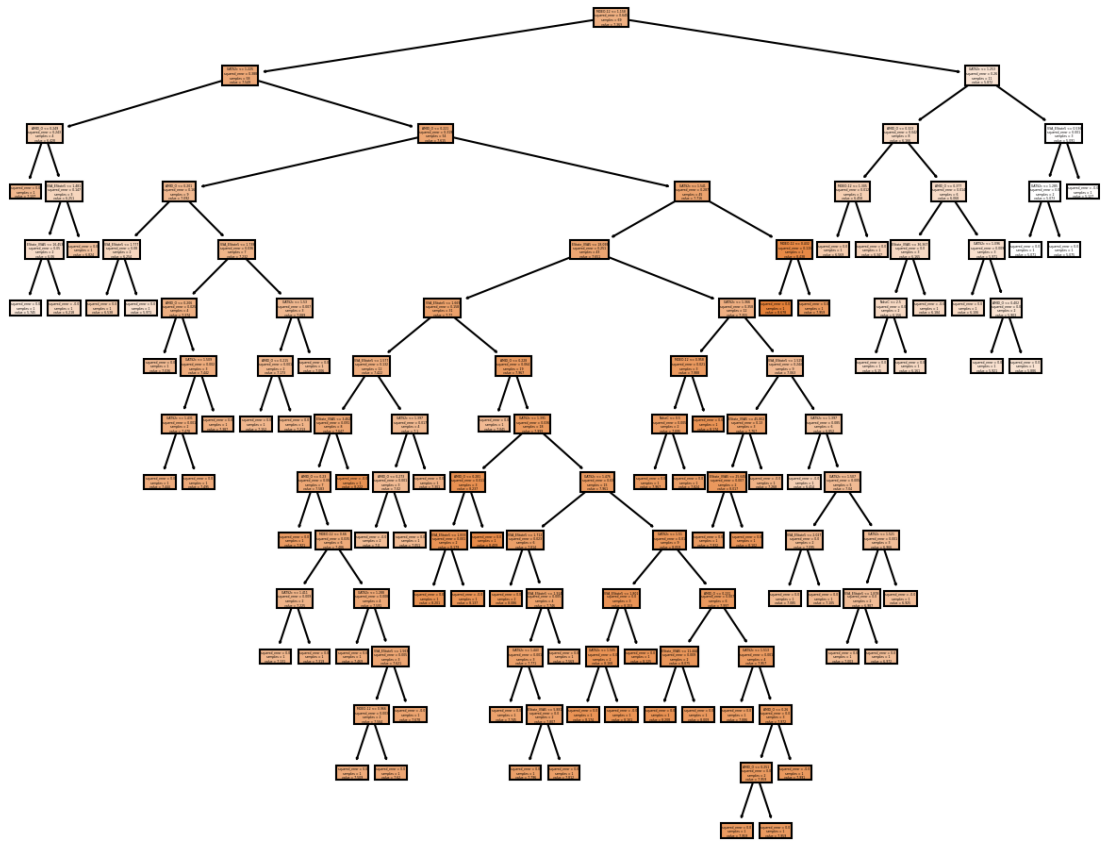

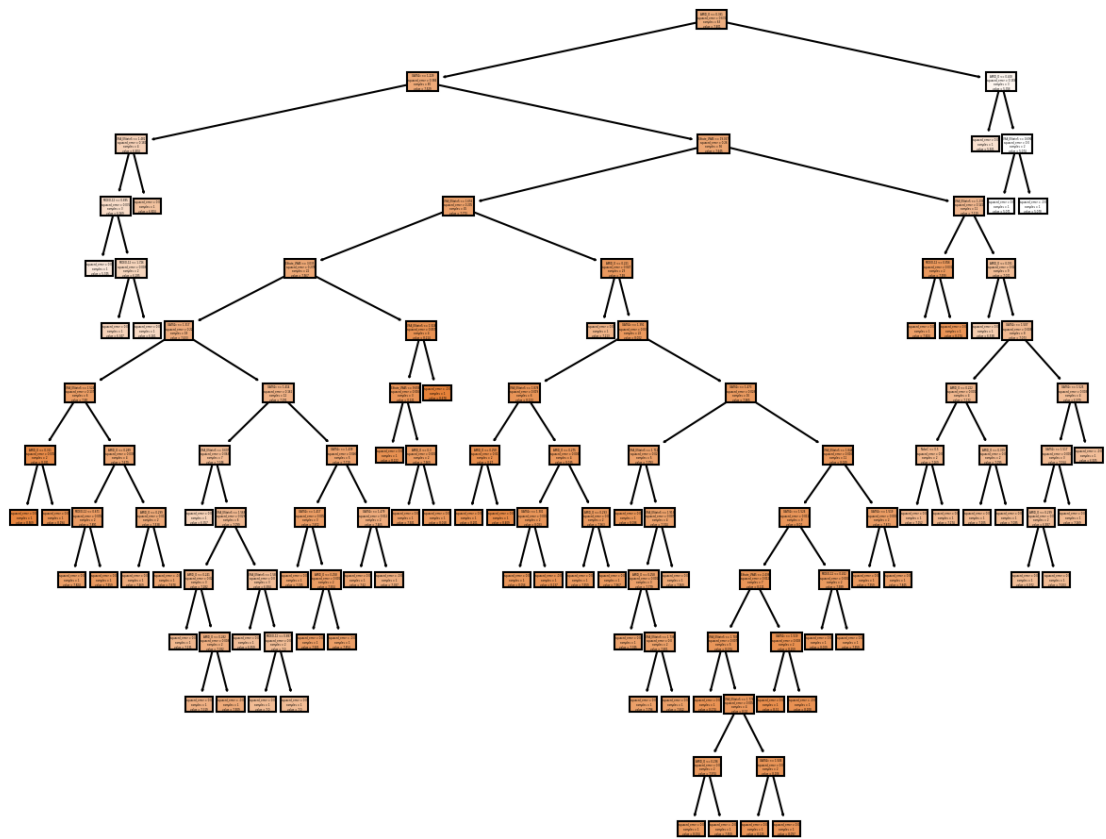

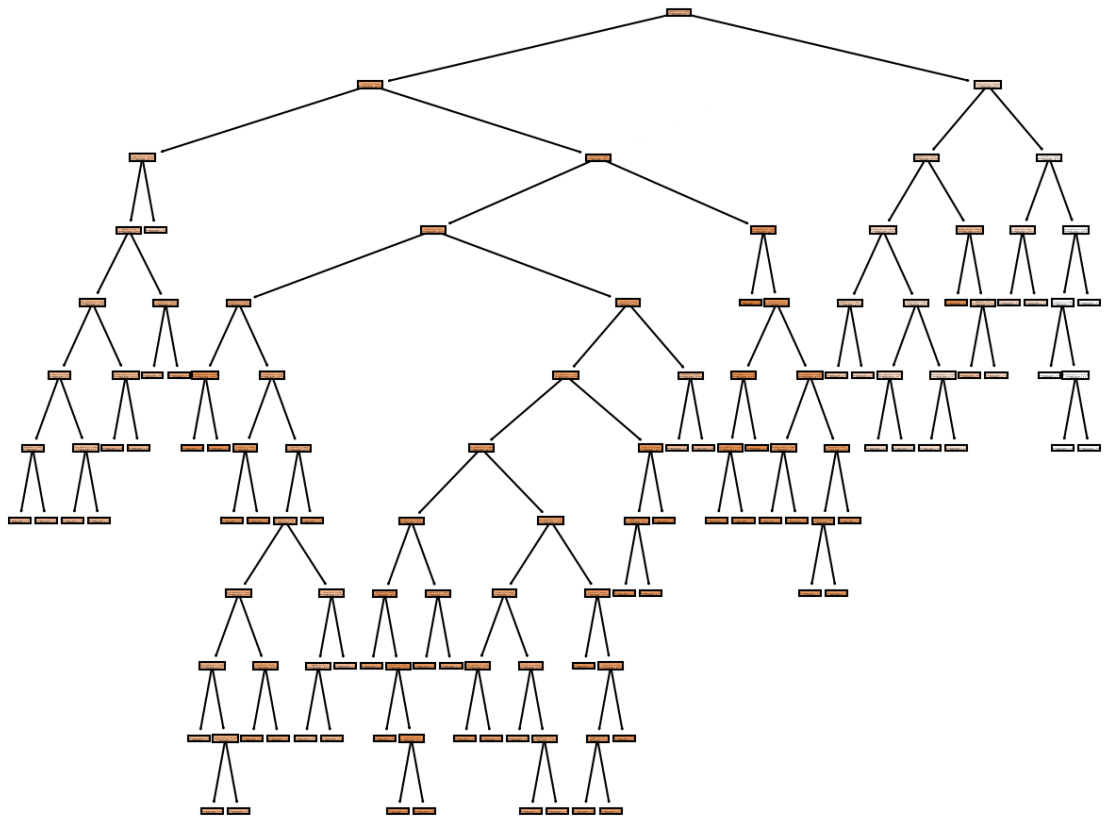

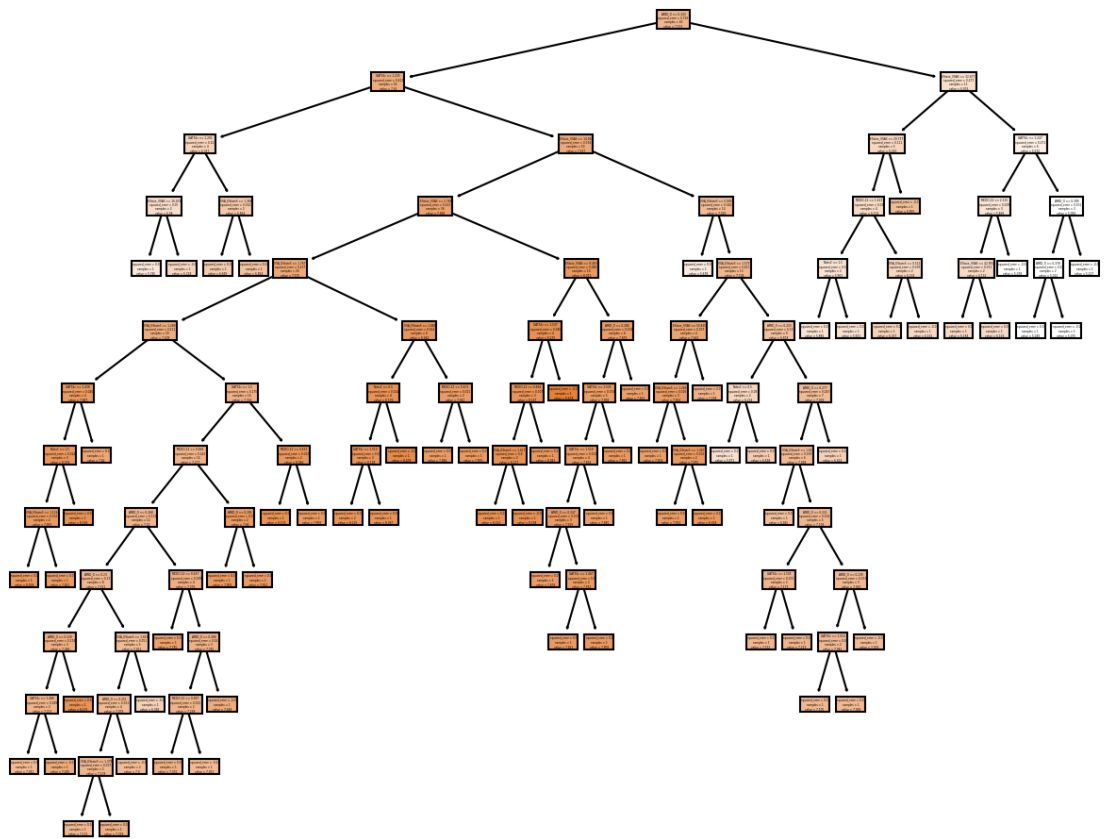

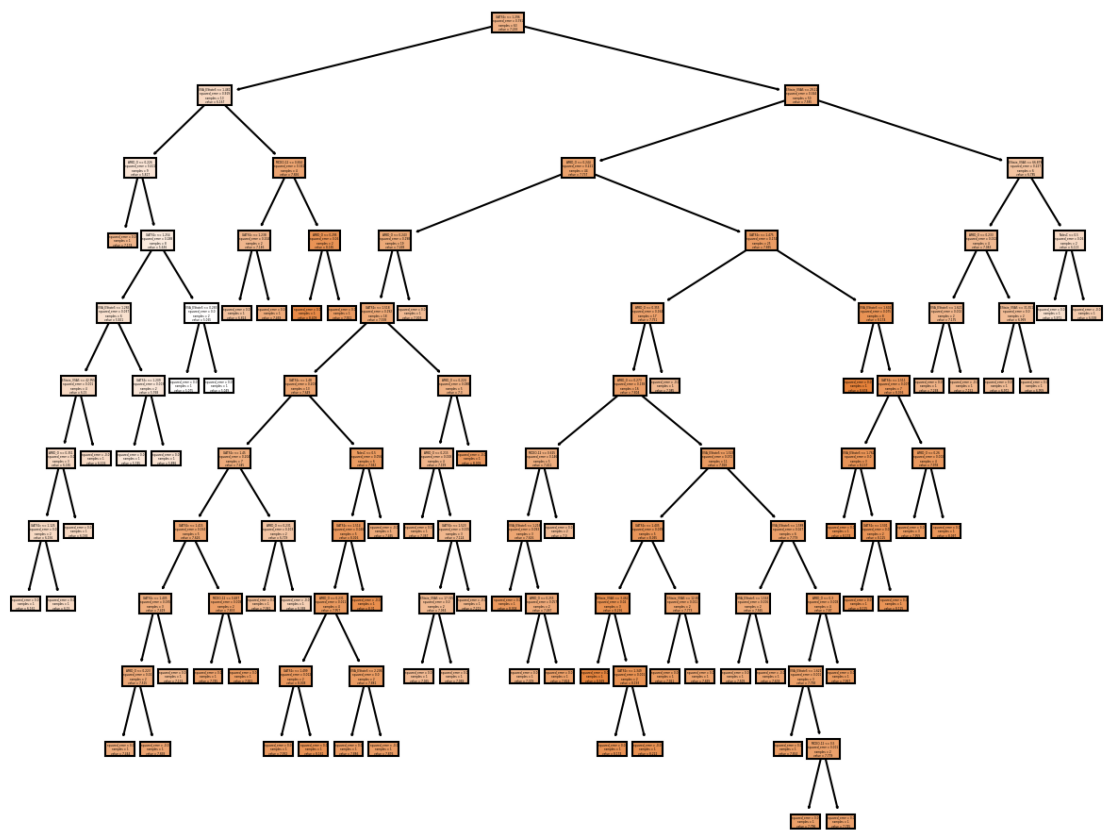

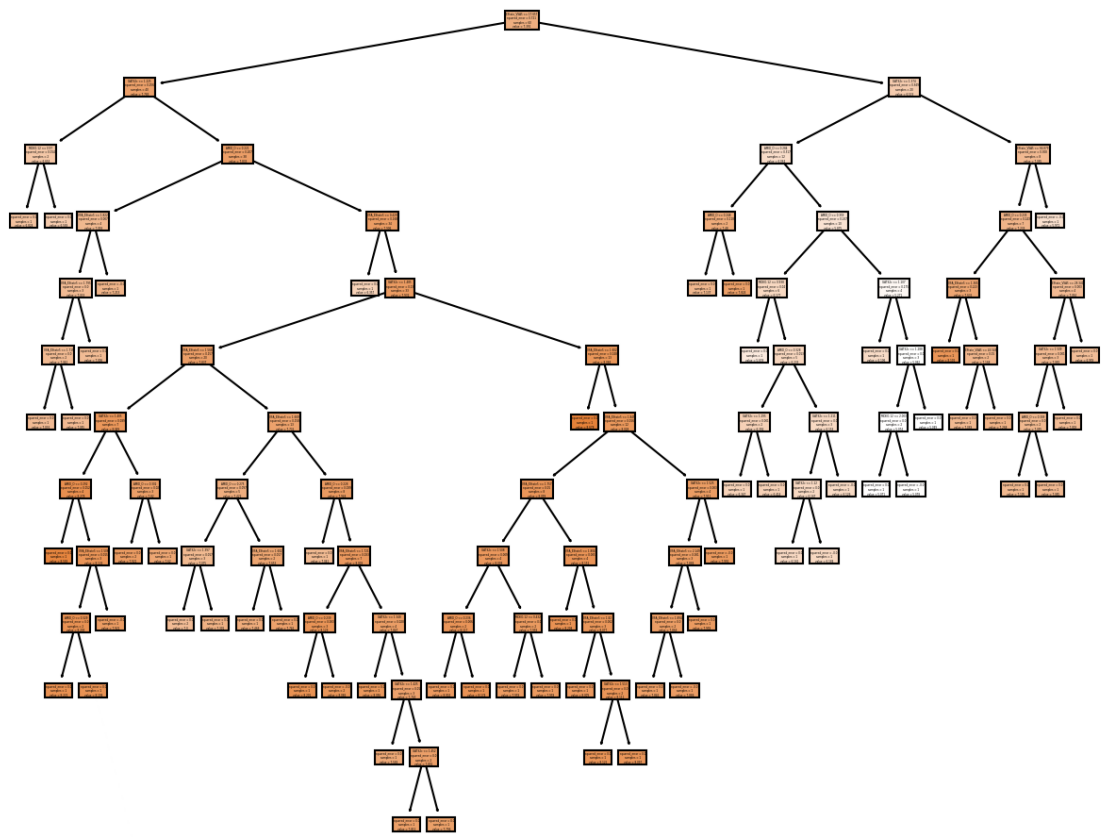



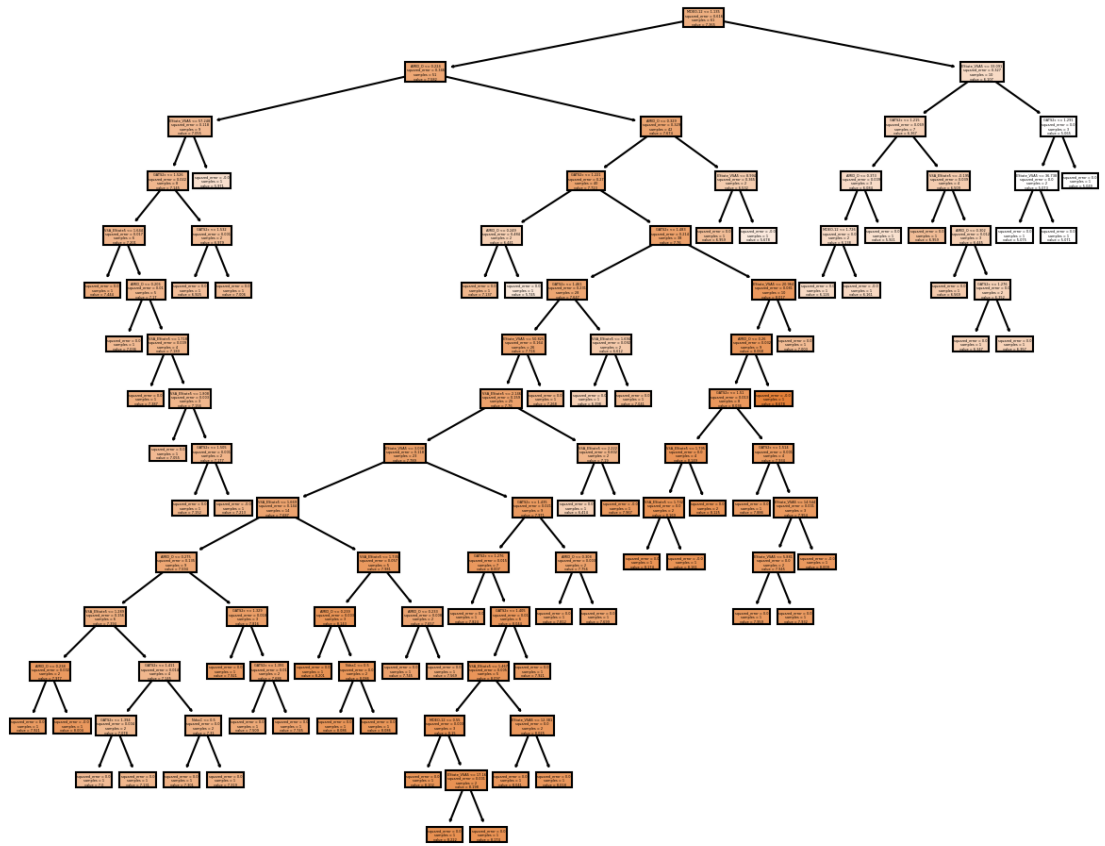

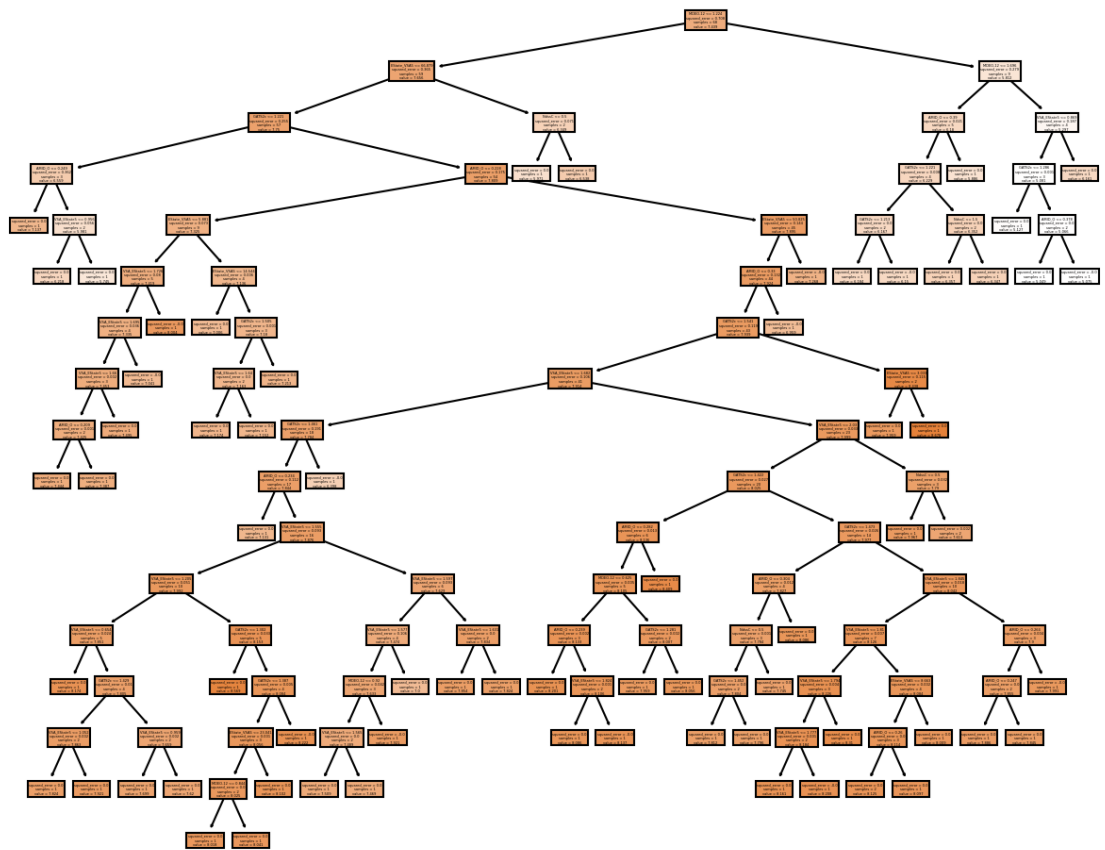

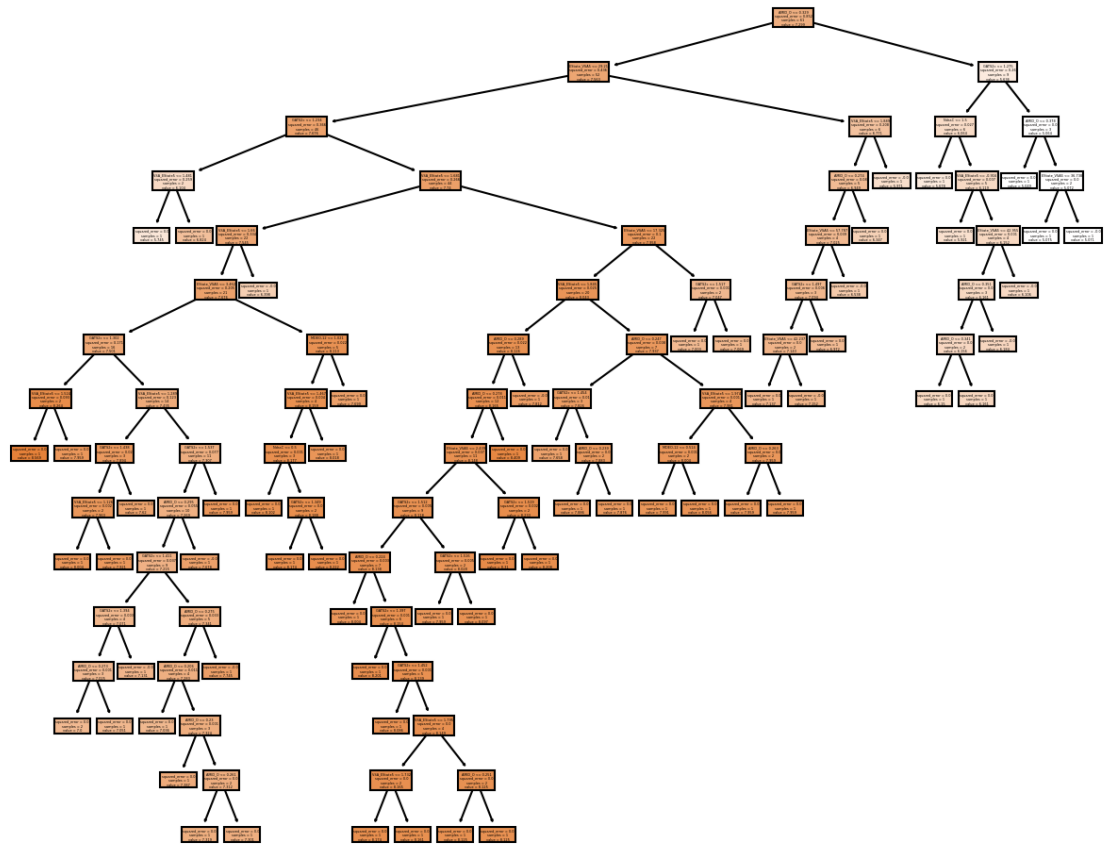

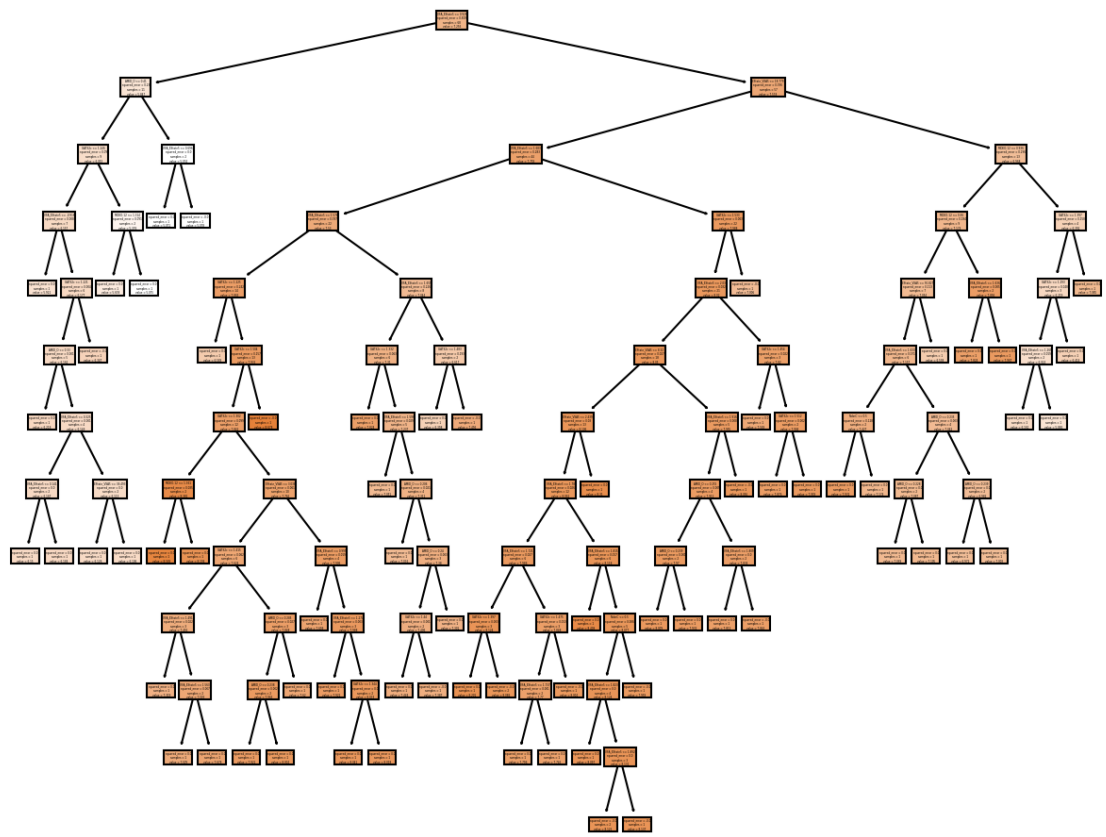

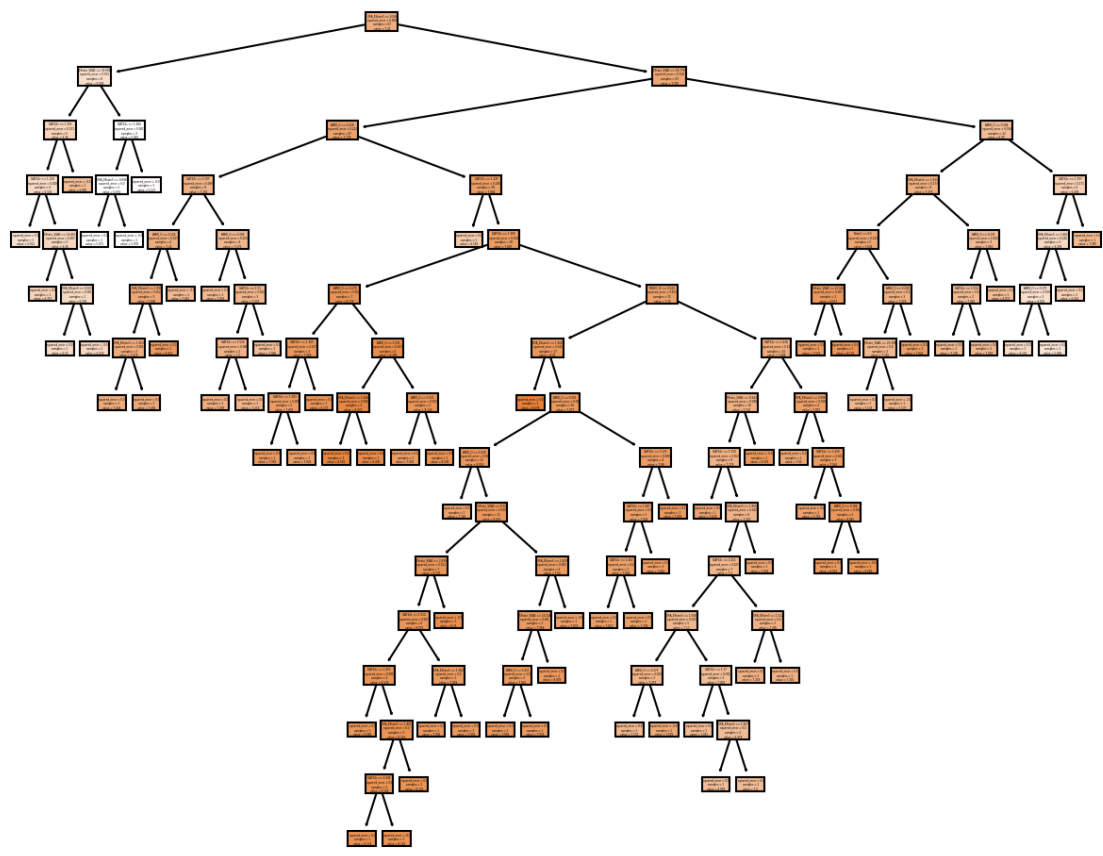

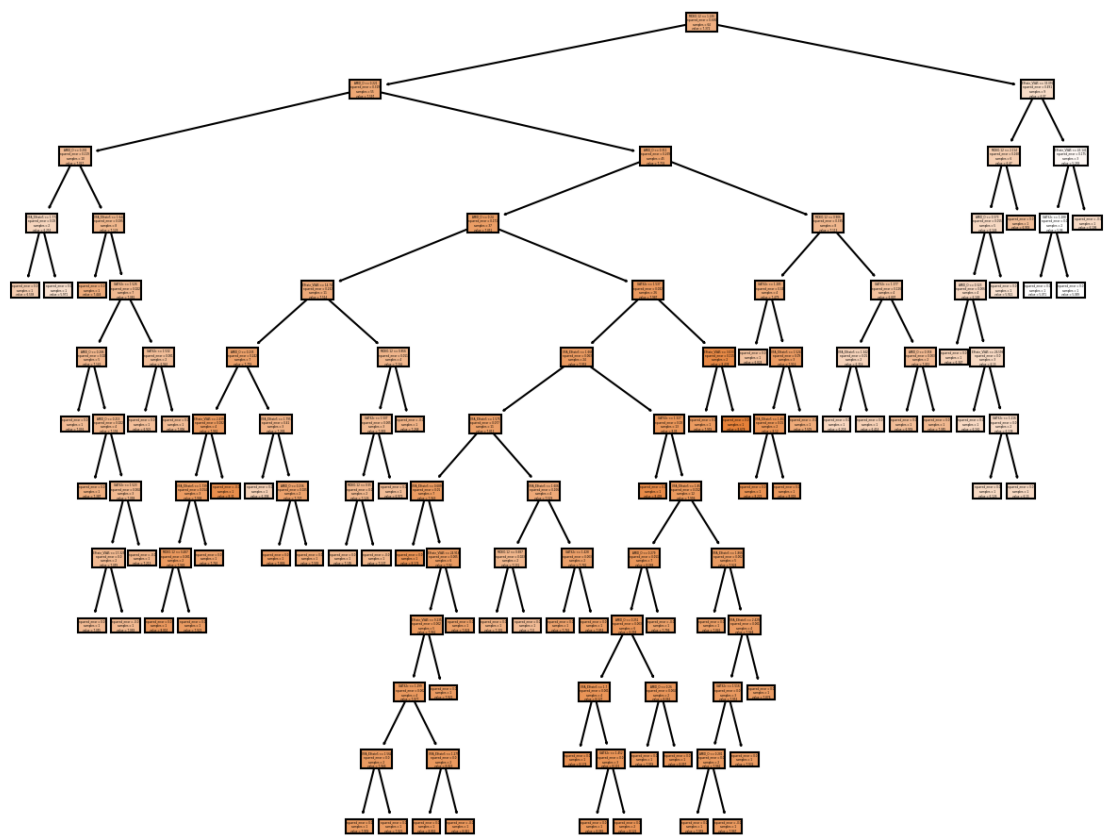

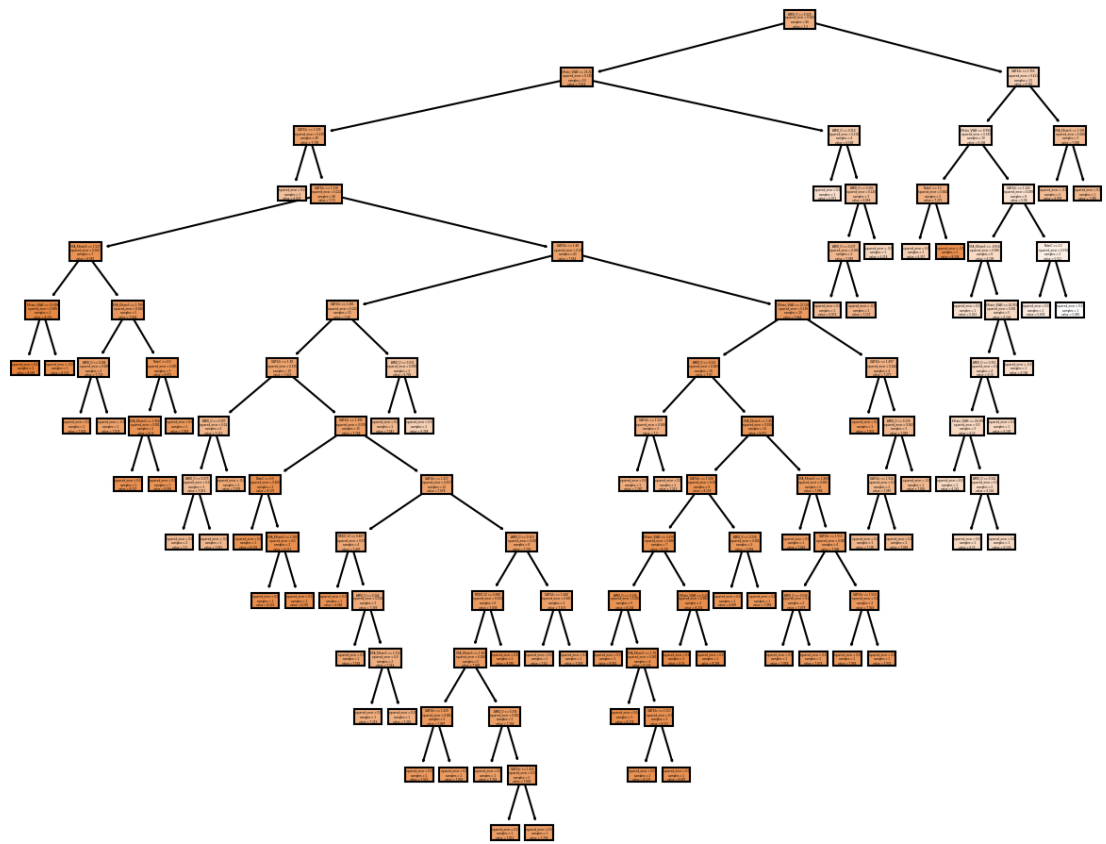

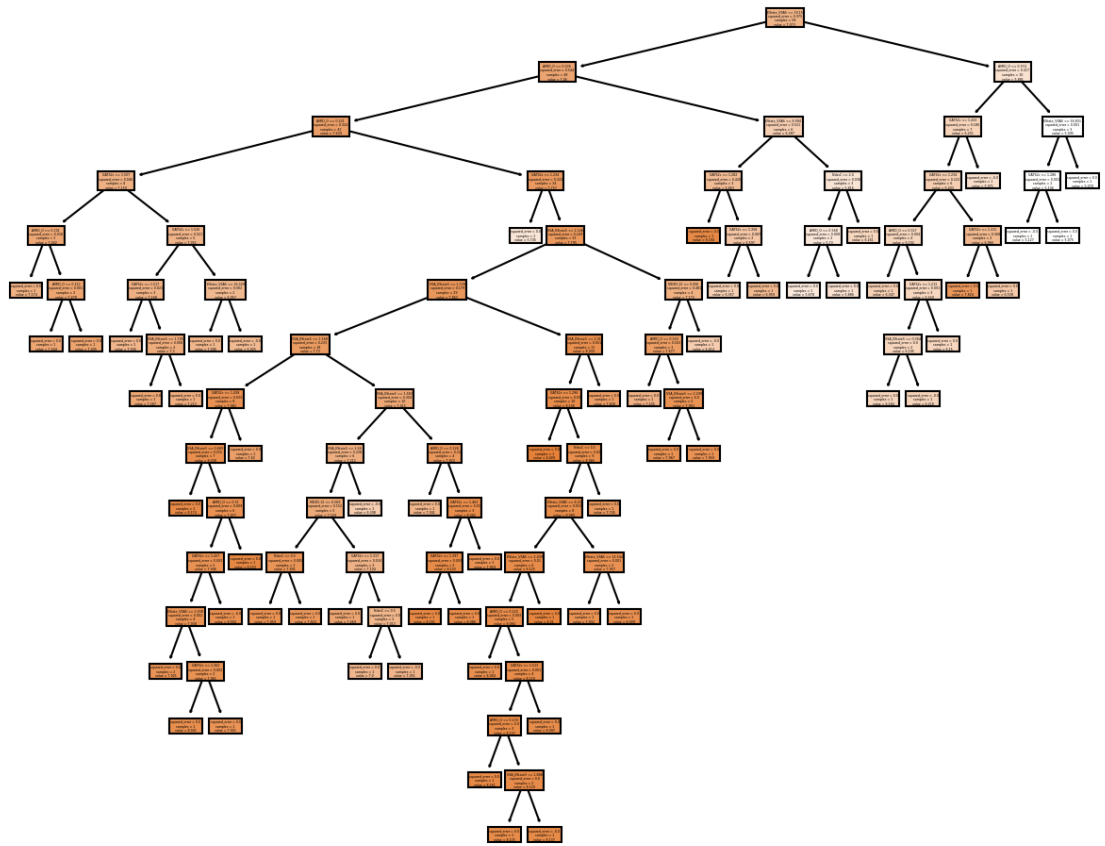



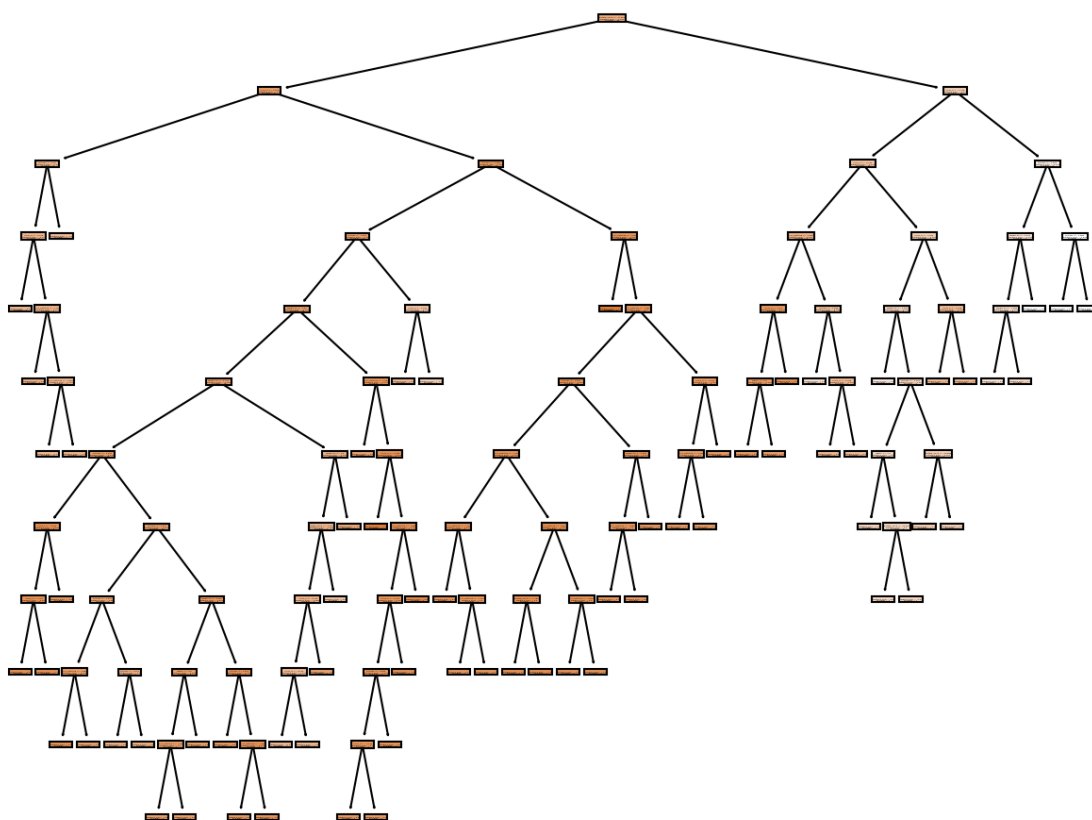

```
[25]: hist2
```

|      | molecular descriptor name | corr_value | absolute correlation value |
|------|---------------------------|------------|----------------------------|
| 226  | AMID_0                    | -0.546843  | 0.546843                   |
| 505  | EState_VSA5               | -0.588780  | 0.588780                   |
| 556  | GATS2c                    | 0.511671   | 0.511671                   |
| 791  | MDE0-12                   | -0.582747  | 0.582747                   |
| 851  | NdssC                     | -0.526783  | 0.526783                   |
| 1091 | VSA_EState5               | 0.529677   | 0.529677                   |

```
[26]: predicted_activity = model.predict(molecular_descriptors[hist2['molecular_
↳descriptor name']])
```

```
[27]: save_to_df['Predicted BALB/3T3'] = predicted_activity
```

```
[28]: save_to_df.head()
```

|   | SMILES                                                         | Predicted A549 \ |
|---|----------------------------------------------------------------|------------------|
| 0 | <chem>COC1=C2C3=CC=C(NC)C(=O)C=C3[C@H1](CCC2=CC(OC)=...</chem> | 8.078406         |

|   |                                                   |          |
|---|---------------------------------------------------|----------|
| 1 | COC1=C2C3=CC=C(NC)C(=O)C=C3[C@H1](CCC2=CC(OC)=... | 7.867157 |
| 2 | COC1=C2C3=CC=C(NC)C(=O)C=C3[C@H1](CCC2=CC(OC)=... | 7.785028 |
| 3 | COC1=C2C3=CC=C(NC)C(=O)C=C3[C@H1](CCC2=CC(OC)=... | 7.742135 |
| 4 | COC1=CC2=CC=C(NC)C(C=C2[C@@H1](N3C=C(N=N3)CN)C... | 6.789342 |

|   | Predicted BALB/3T3 |
|---|--------------------|
| 0 | 7.961224           |
| 1 | 7.934181           |
| 2 | 7.407610           |
| 3 | 7.568620           |
| 4 | 7.974253           |

## 4 LoVo

```
[29]: ## The best model is: Random Forest (correlation_threshold = 0.54, 2 features, 18 estimators, random_state=28)
```

```
[30]: target = 'LoVo'
data = load_prepared_data[list(load_prepared_data.columns)[0:-10]]
data[target] = load_prepared_data[load_prepared_data.columns[-3]]
data.head()
```

|   | AATS0Z    | AATS0are | AATS0d   | AATS0dv  | AATS0i     | AATS0m    | AATS0p   | \ |
|---|-----------|----------|----------|----------|------------|-----------|----------|---|
| 0 | 25.090909 | 6.046518 | 3.109091 | 6.662626 | 160.775045 | 99.075564 | 1.555512 |   |
| 1 | 24.448276 | 6.008422 | 3.051724 | 6.386973 | 161.021674 | 96.473315 | 1.538471 |   |
| 2 | 23.868852 | 5.974074 | 3.000000 | 6.138434 | 161.244045 | 94.127025 | 1.523105 |   |
| 3 | 23.868852 | 5.974074 | 3.032787 | 6.171220 | 161.244045 | 94.127025 | 1.523105 |   |
| 4 | 23.343750 | 5.942945 | 2.953125 | 5.913194 | 161.445569 | 92.000700 | 1.509180 |   |

  

|   | AATS0pe  | AATS0s   | AATS0se  | ... | piPC10   | piPC2    | piPC3    | piPC4    | \ |
|---|----------|----------|----------|-----|----------|----------|----------|----------|---|
| 0 | 6.126680 | 3.435416 | 7.629859 | ... | 7.999655 | 4.266195 | 4.915408 | 5.516700 |   |
| 1 | 6.088791 | 3.330998 | 7.596891 | ... | 8.018726 | 4.280132 | 4.922714 | 5.520711 |   |
| 2 | 6.054630 | 3.236850 | 7.567166 | ... | 8.028799 | 4.293878 | 4.929967 | 5.524706 |   |
| 3 | 6.054630 | 3.257798 | 7.567166 | ... | 8.037440 | 4.307438 | 4.929967 | 5.524706 |   |
| 4 | 6.023670 | 3.151529 | 7.540228 | ... | 8.034892 | 4.307438 | 4.937168 | 5.528685 |   |

  

|   | piPC5    | piPC6    | piPC7    | piPC8    | piPC9    | LoVo     |
|---|----------|----------|----------|----------|----------|----------|
| 0 | 6.098566 | 6.595759 | 6.979116 | 7.337313 | 7.681445 | 8.187087 |
| 1 | 6.103048 | 6.601209 | 6.985613 | 7.349442 | 7.695531 | 8.070581 |
| 2 | 6.105281 | 6.603923 | 6.989306 | 7.353932 | 7.704023 | 8.055517 |
| 3 | 6.107510 | 6.606629 | 6.992068 | 7.361425 | 7.709420 | 8.070581 |
| 4 | 6.107510 | 6.605277 | 6.991148 | 7.356489 | 7.707175 | 7.277366 |

[5 rows x 1212 columns]

```
[31]: model, train_r2_, test_r2_, hist1, hist2, target_column_name,
      ↪ training_data_RMSE, test_data_RMSE = pred_model.
      ↪ prepare_data_and_create_model(molecular_descriptors_df=data,
      ↪
      ↪ correlation_threshold=0.54,
      ↪
      ↪ standardization=False,
      ↪
      ↪ model_type='RandomForestRegressor',
      ↪
      ↪ n_estimators=18,
      ↪
      ↪ target_column_name = target,
      ↪
      ↪ random_state=28,
      ↪
      ↪ train_test_split_=True,
      ↪
      ↪ verbose=True)
print("R^2 score: " + str(r2_score(data[target], model.
      ↪ predict(data[hist2['molecular descriptor name']]))))
print("Mean squared error: "+str(mean_squared_error(data[target], model.
      ↪ predict(data[hist2['molecular descriptor name']]))))
print('Mean absolute error: ' + str(mean_absolute_error(data[target], model.
      ↪ predict(data[hist2['molecular descriptor name']]))))
print("Root Mean Square Error: "+ str(math.
      ↪ sqrt(mean_squared_error(data[target], model.predict(data[hist2['molecular_
      ↪ descriptor name']]))))
```

I am not doing standardization...

|   | molecular descriptor name |  |
|---|---------------------------|--|
| 0 | AATS0Z                    |  |
| 1 | AATS0are                  |  |
| 2 | AATS0d                    |  |
| 3 | AATS0dv                   |  |
| 4 | AATS0i                    |  |

  

|   | molecular descriptor name | corr_value |
|---|---------------------------|------------|
| 0 | AATS0Z                    | -0.027037  |
| 1 | AATS0are                  | -0.129823  |
| 2 | AATS0d                    | 0.042740   |
| 3 | AATS0dv                   | -0.120173  |
| 4 | AATS0i                    | 0.132395   |

  

|   | molecular descriptor name | corr_value | absolute correlation value |
|---|---------------------------|------------|----------------------------|
| 0 | AATS0Z                    | -0.027037  | 0.027037                   |
| 1 | AATS0are                  | -0.129823  | 0.129823                   |
| 2 | AATS0d                    | 0.042740   | 0.042740                   |
| 3 | AATS0dv                   | -0.120173  | 0.120173                   |

```

4          AATSOi      0.132395          0.132395
      molecular descriptor name  corr_value  absolute correlation value
505          EState_VSA5    -0.579664          0.579664
791          MDEO-12      -0.558727          0.558727
1211         LoVo        1.000000          1.000000
      molecular descriptor name  corr_value  absolute correlation value
505          EState_VSA5    -0.579664          0.579664
791          MDEO-12      -0.558727          0.558727
The model used is: RandomForest...
Return the coefficient of determination of the prediction:
0.43199473372238906
R^2 score: 0.7763844047145243
Correlation coefficient: 0.8811267812945673
Test data - unseen during training:
R^2 score: 0.43199473372238906
Correlation coefficient: 0.6572630628008767
[8.01614039 6.10216465 8.29736491 6.10216465 7.84848772 8.06296524
 7.84018633 8.01614039 7.54269918 7.84848772 8.01614039 7.84848772
 8.13682138 8.01615479 8.06296524 6.58534596 7.84018633 6.97001882]
113      7.795880
35       6.254925
101      7.275724
36       7.017729
100      7.337242
13       8.055517
0        8.187087
114      7.638272
104      8.318759
96       7.769551
40       8.050610
103      8.136677
48       7.853872
39       8.267606
14       7.273273
117      6.167491
21       7.554396
9        6.343902
Name: LoVo, dtype: float64
Training Root Mean Square Error: 0.4438384819944741
Testing Root Mean Square Error: 0.5047746604903675
R^2 score: 0.7487186984561868
Mean squared error: 0.20566332706526017
Mean absolute error: 0.319905742678649
Root Mean Square Error: 0.45350118750148843

```

```
[32]: # save
```

```
joblib.dump(model, "Random_forest/random_forest_model_18_estimators_LoVo.
↳joblib")
```

```
[32]: ['Random_forest/random_forest_model_18_estimators_LoVo.joblib']
```

```
[33]: for x, decision_tree in enumerate(model.estimators_):
plt.figure(figsize=(10,8), dpi=150)
plot_tree(decision_tree, feature_names=list(hist2['molecular_descriptor_
↳name']),
filled=True)
plt.savefig('Random_forest/random_forest_18_'+str(x)+'_model_LoVo.
↳pdf',bbox_inches = "tight")
```

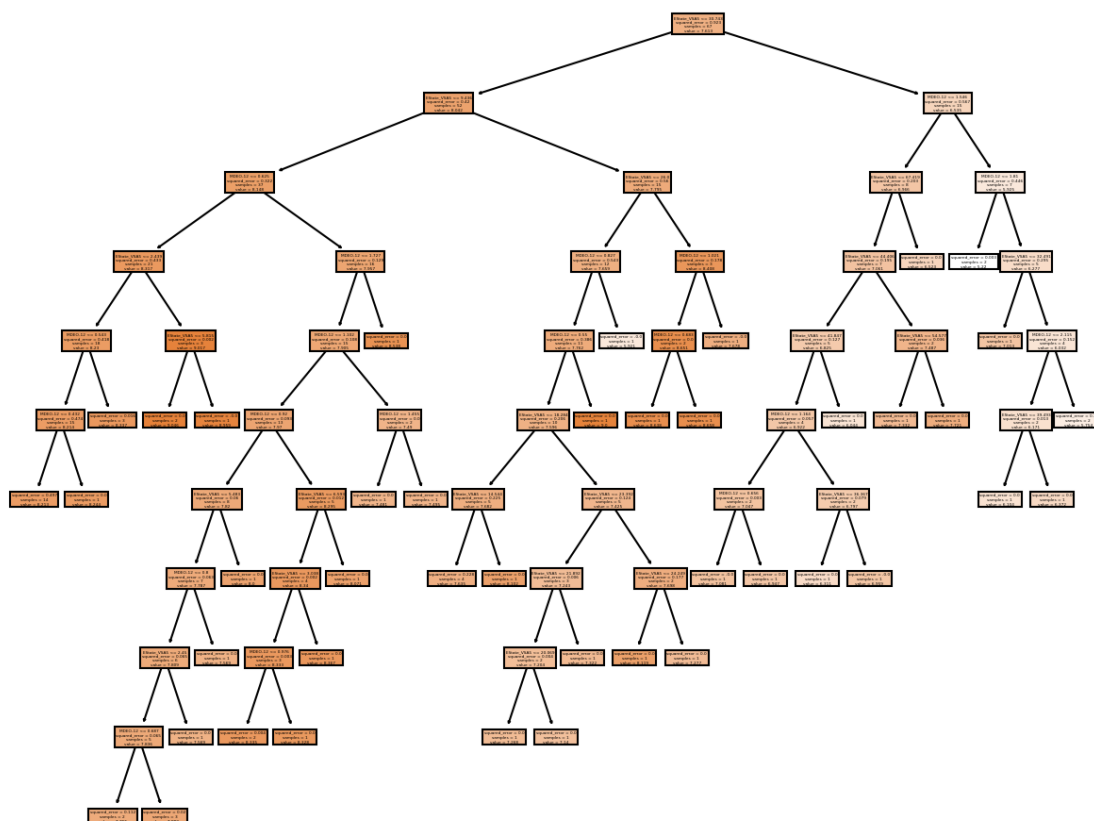

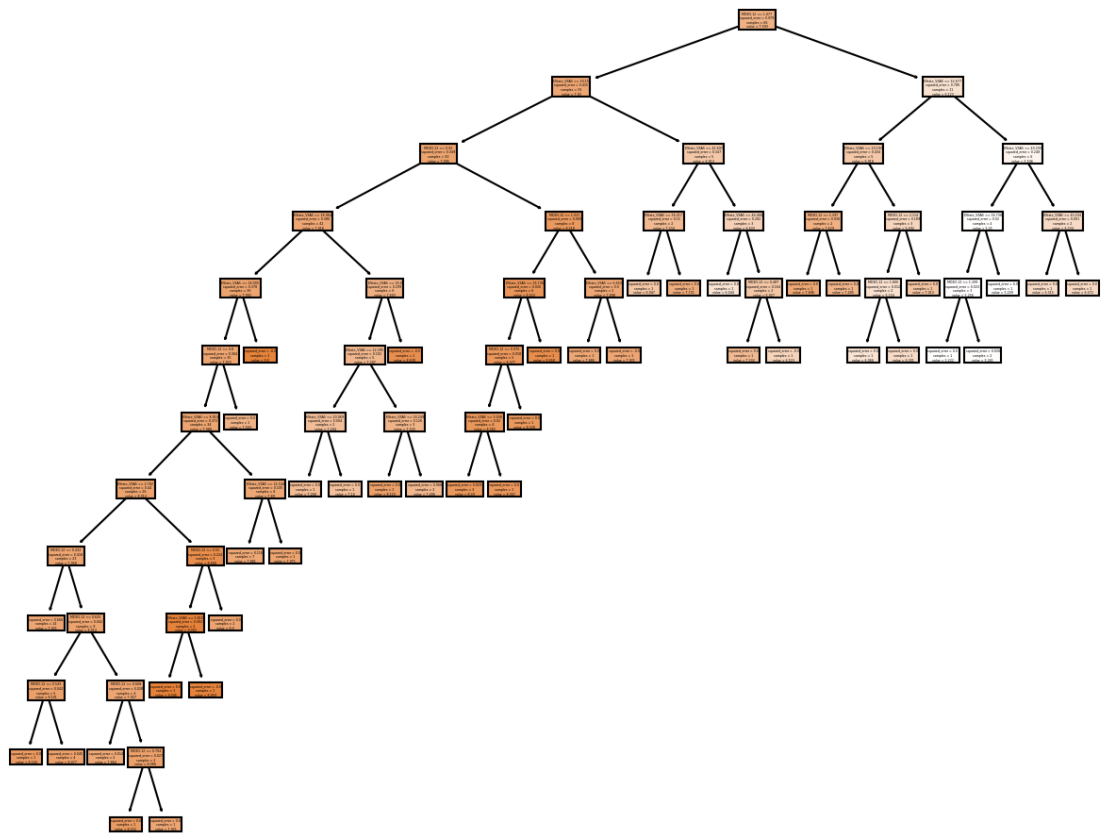

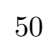

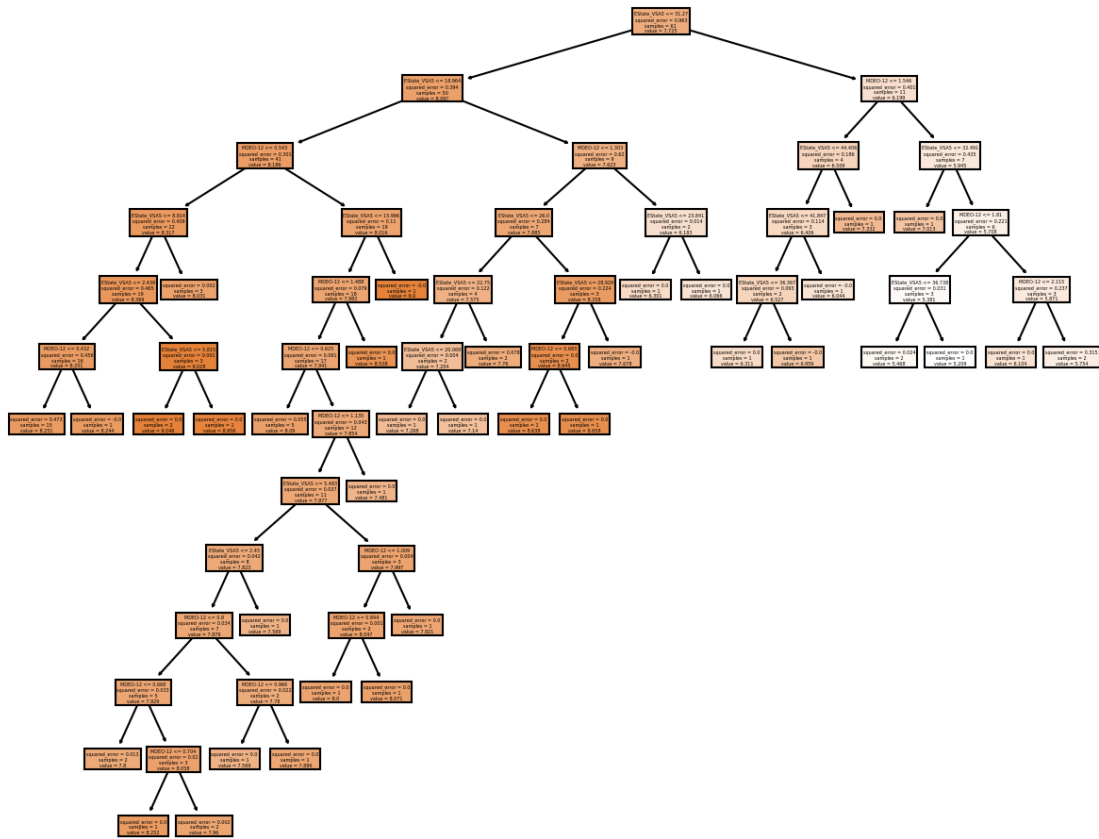



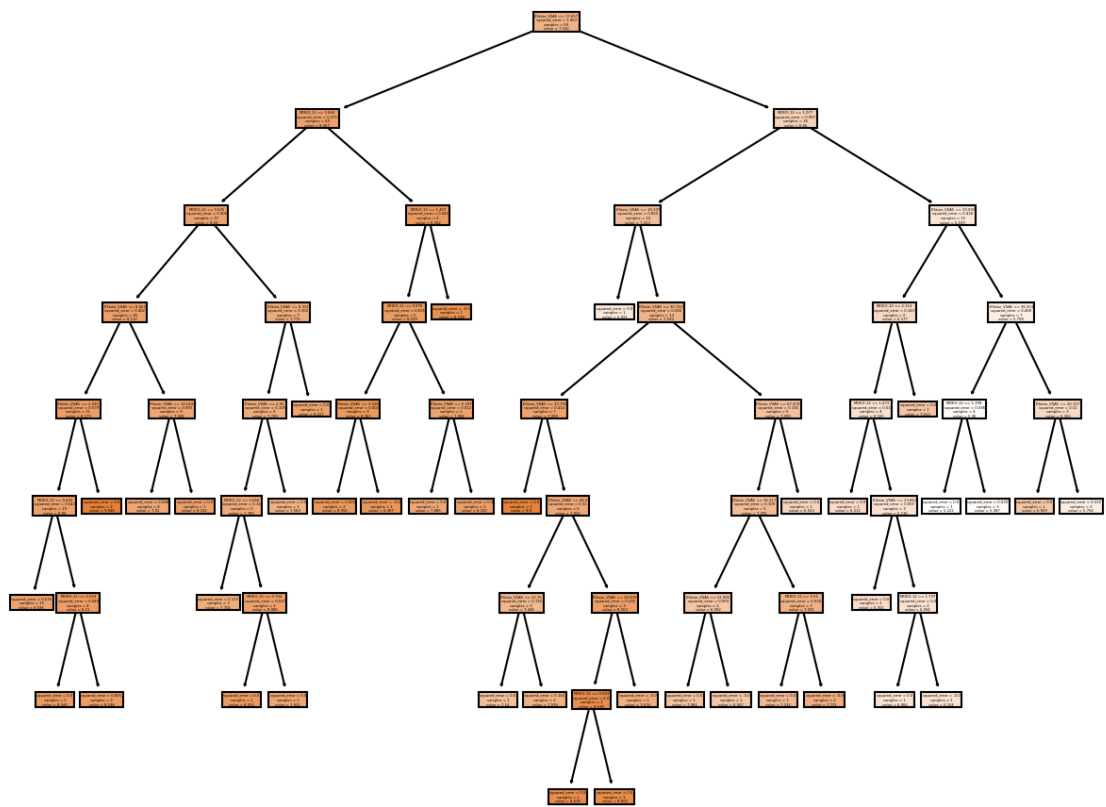

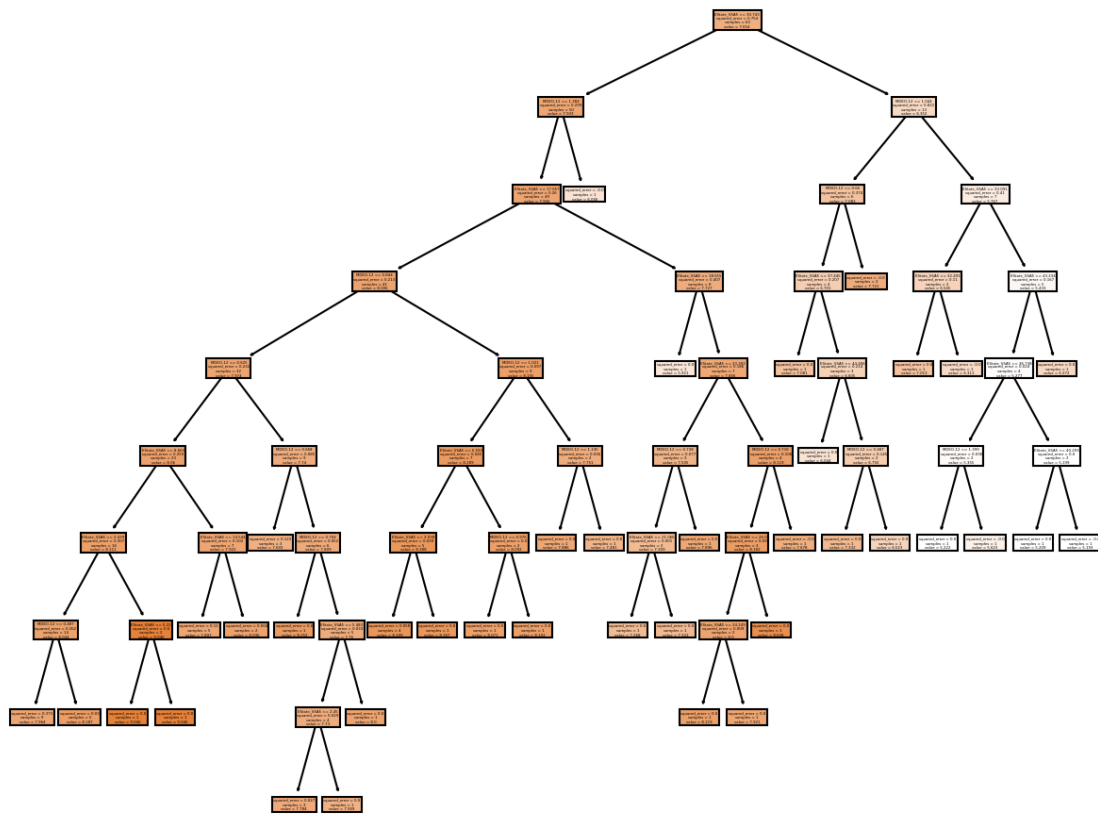

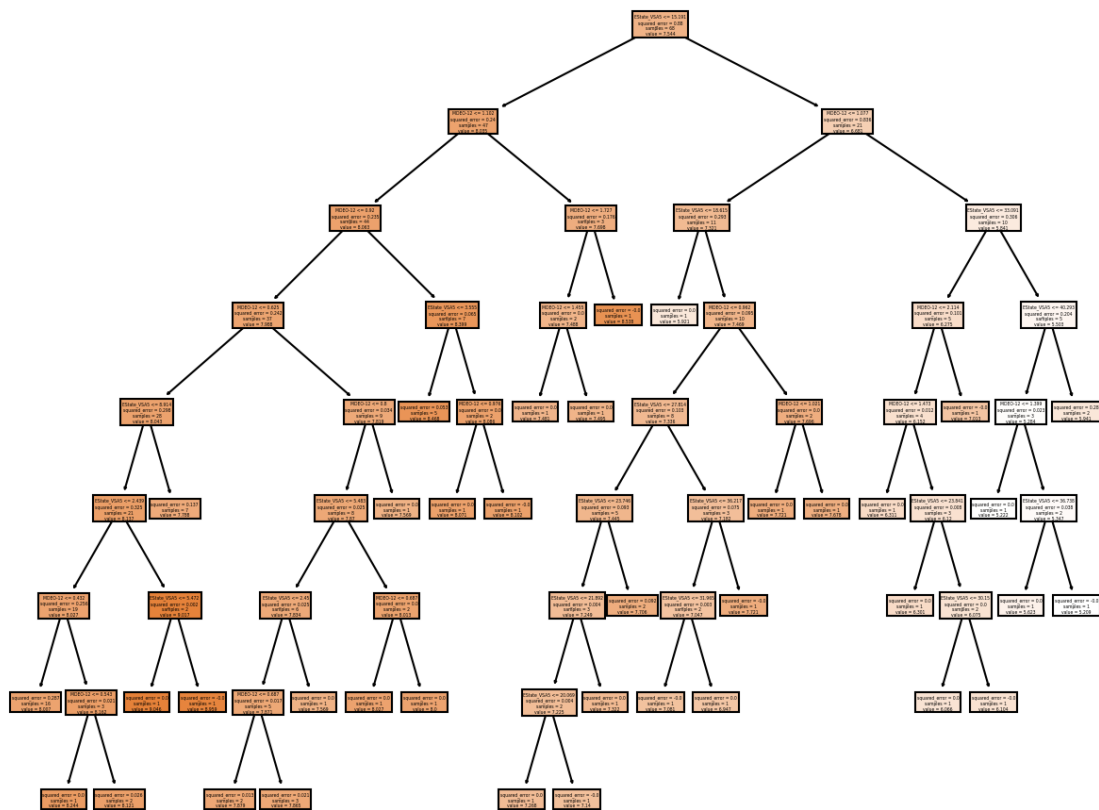

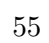

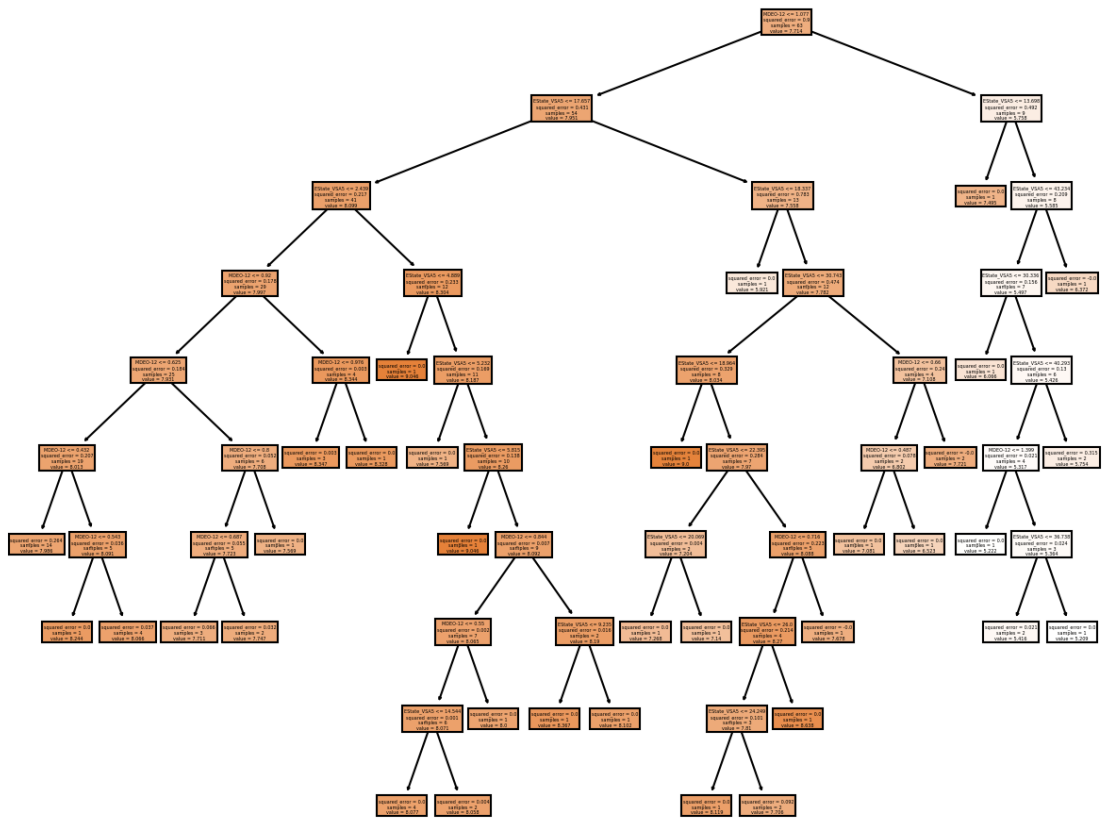

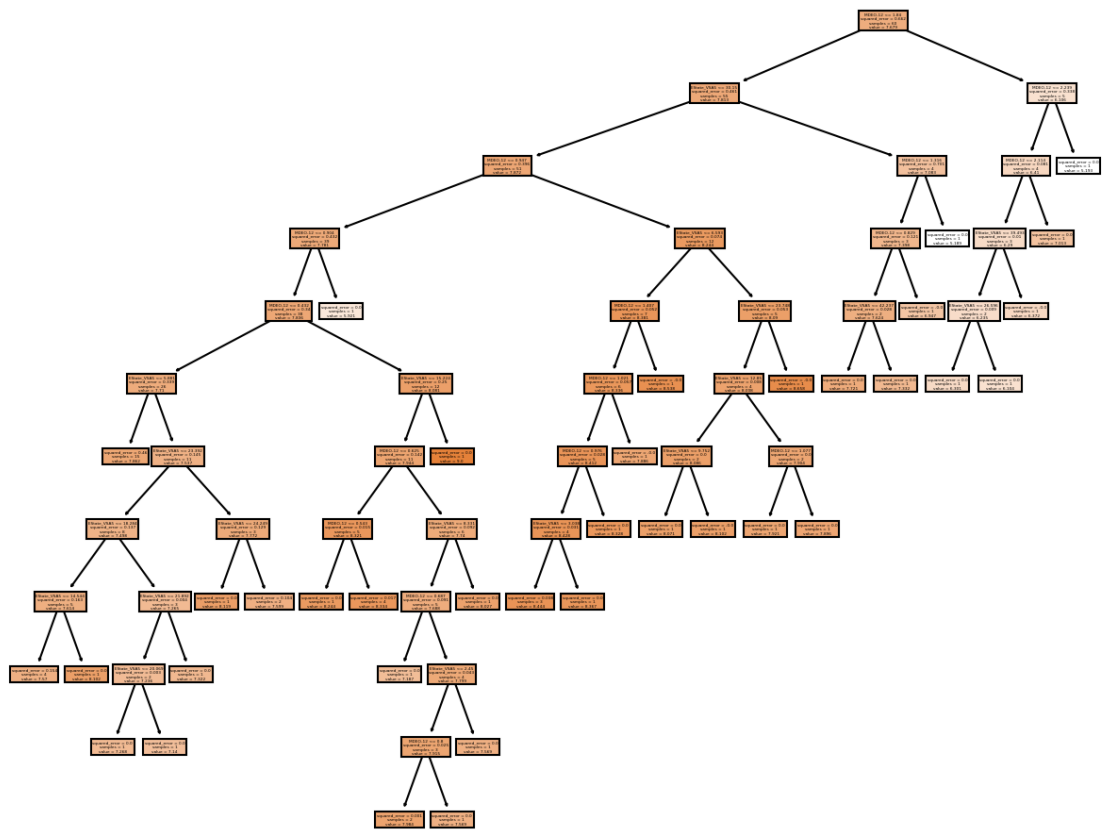

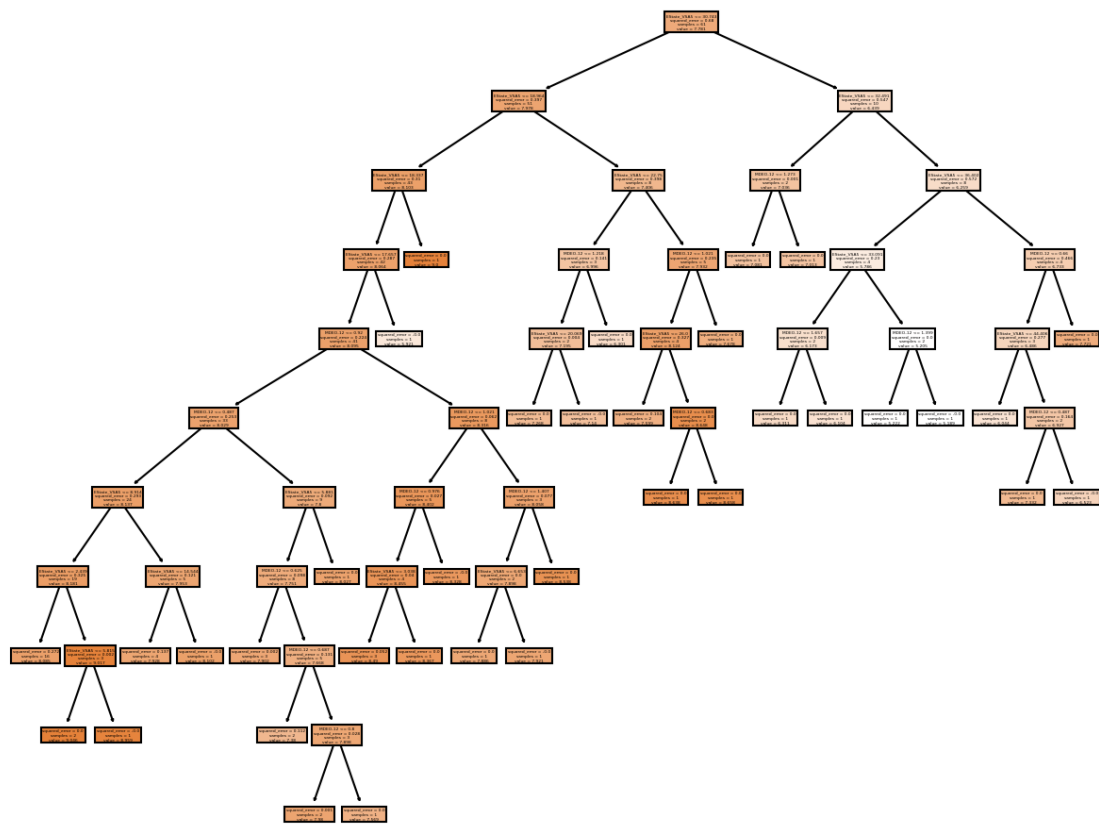

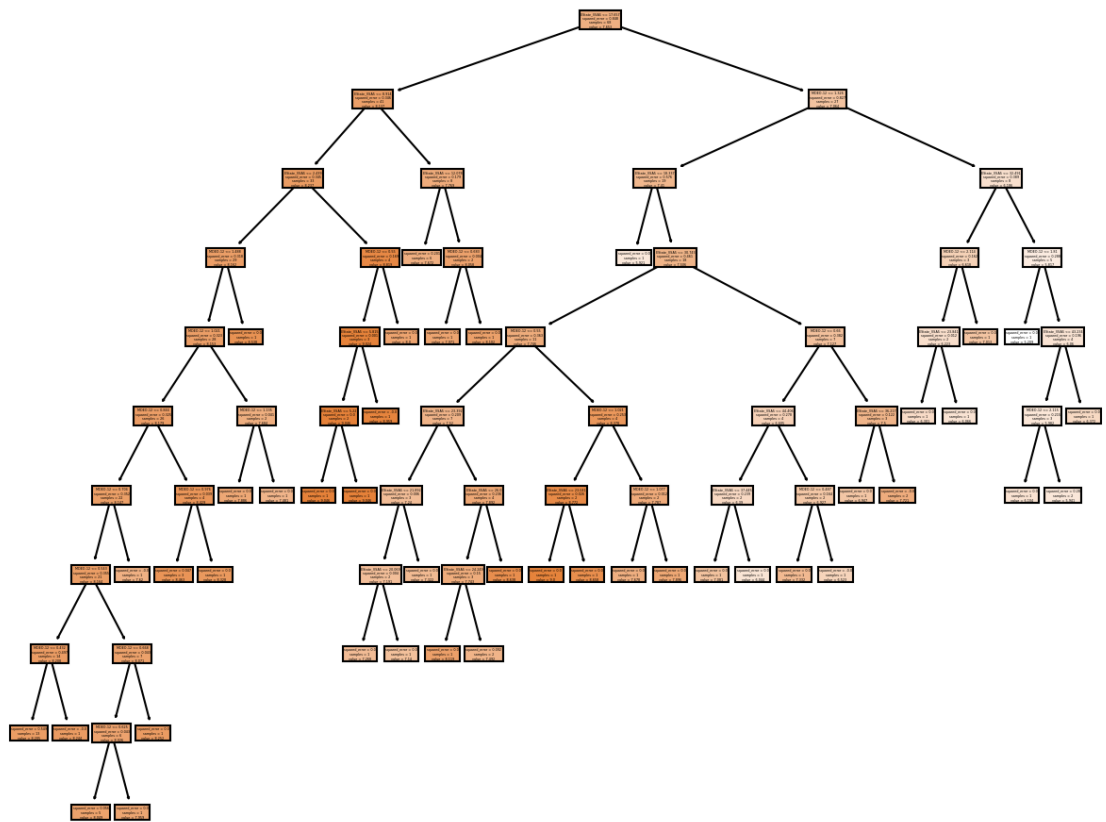



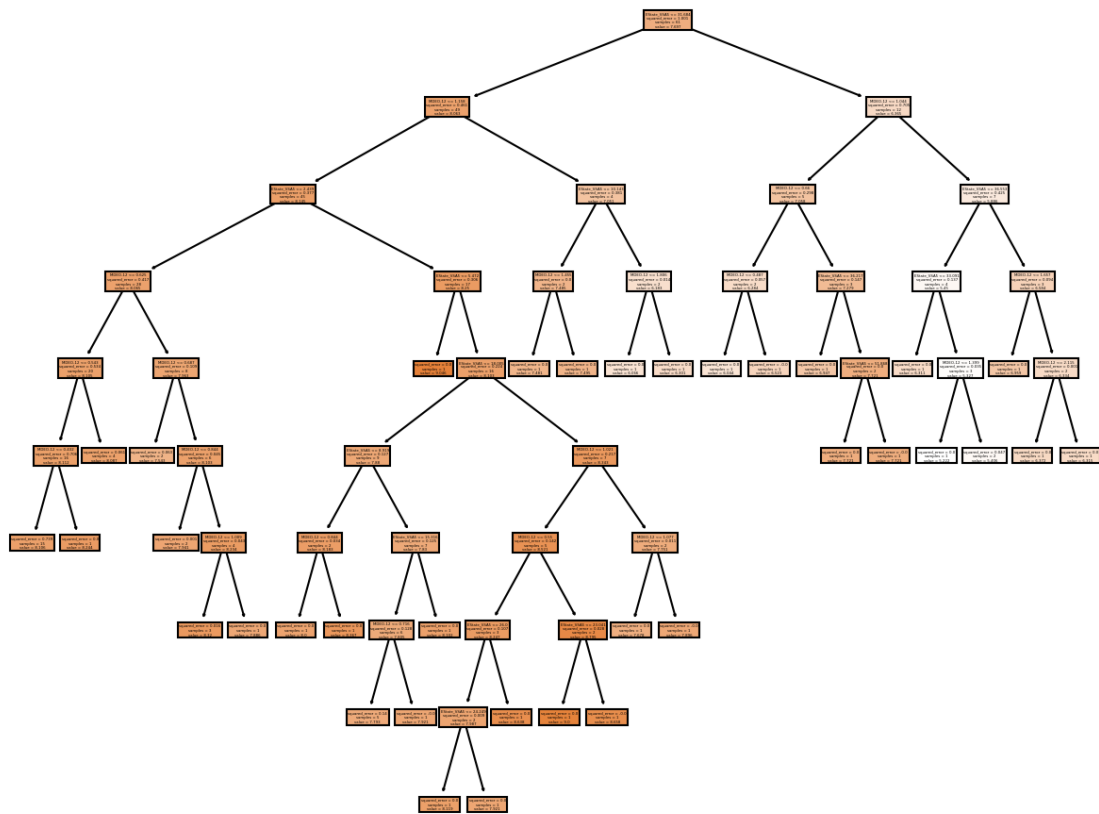

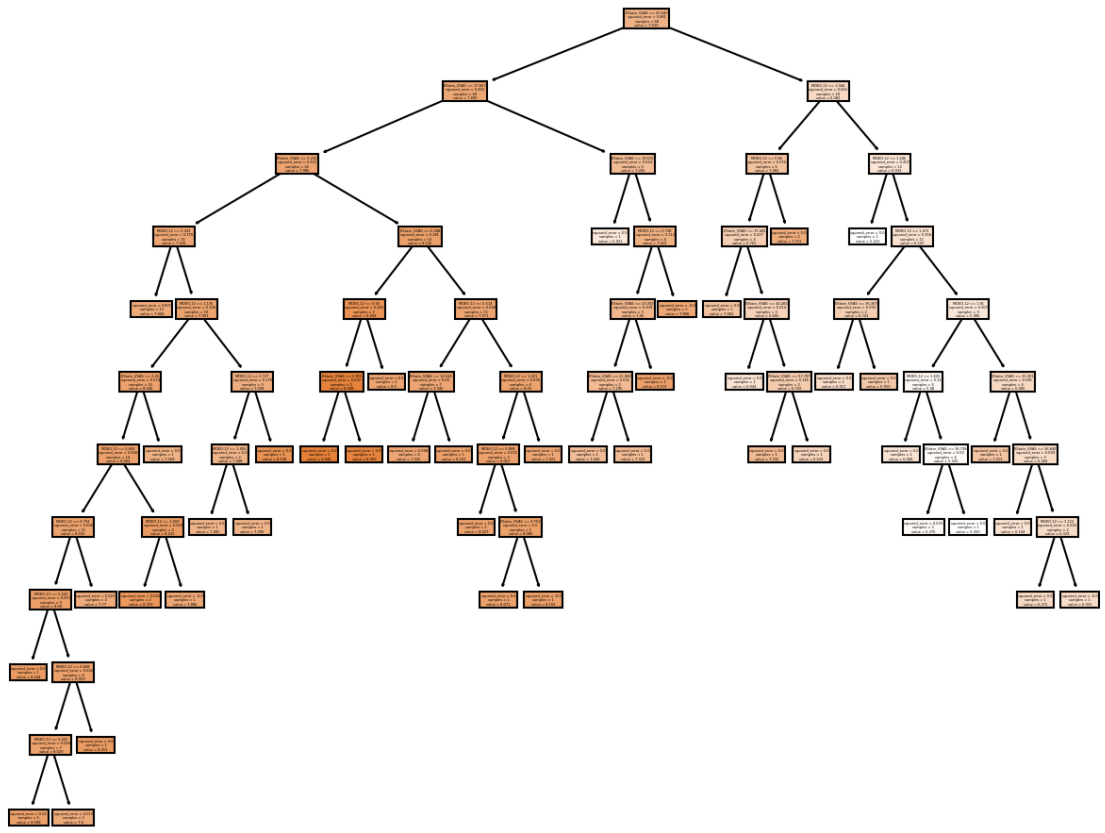

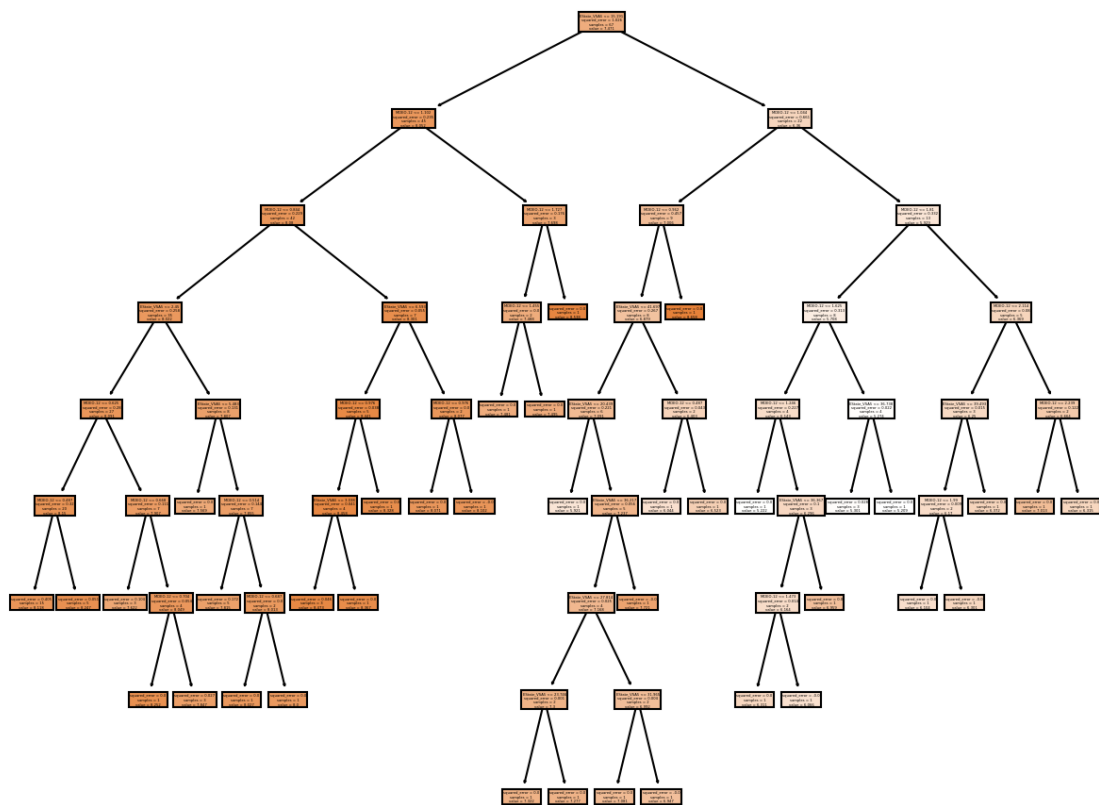

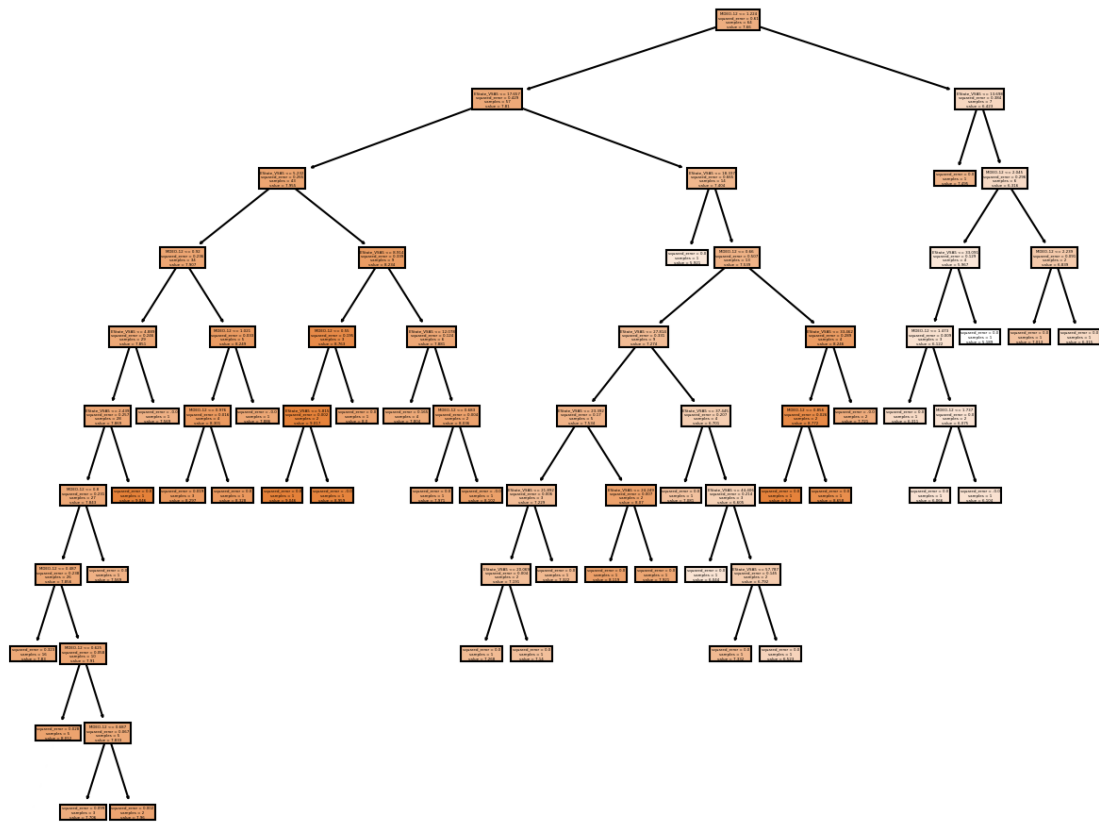

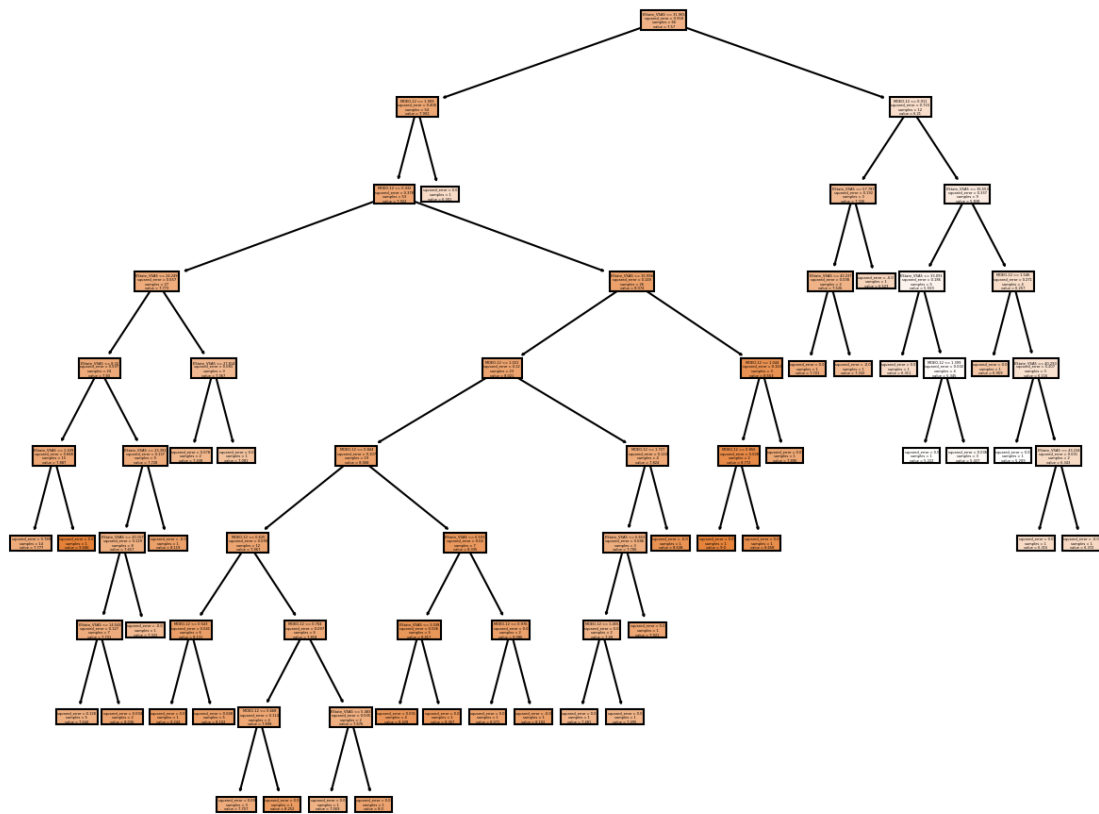

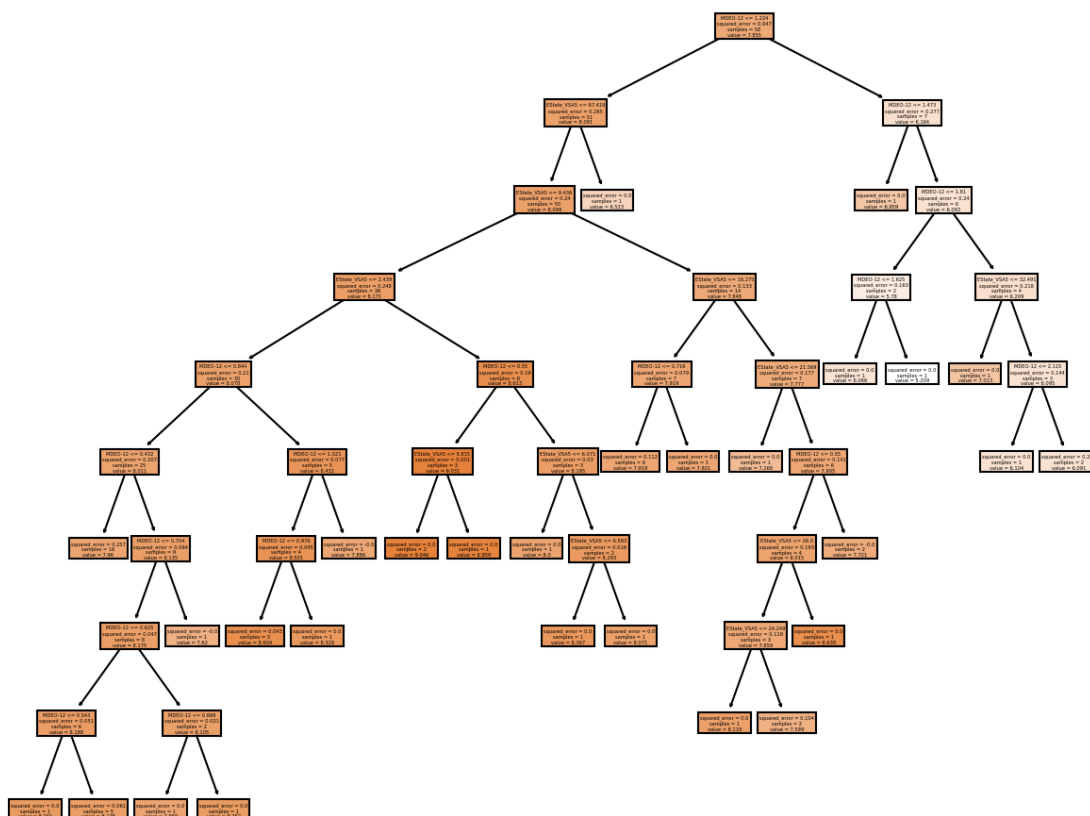

```
[34]: hist2
```

```
[34]:      molecular descriptor name  corr_value  absolute correlation value
505                EState_VSA5    -0.579664                0.579664
791                MDEO-12       -0.558727                0.558727
```

```
[35]: predicted_activity = model.predict(molecular_descriptors[hist2['molecular_
↳descriptor name']])
```

```
[36]: save_to_df['Predicted LoVo'] = predicted_activity
```

```
[37]: save_to_df.head()
```

```
[37]:      SMILES  Predicted A549  \
0  COC1=C2C3=CC=C(NC)C(=O)C=C3[C@H1](CCC2=CC(OC)=...  8.078406
1  COC1=C2C3=CC=C(NC)C(=O)C=C3[C@H1](CCC2=CC(OC)=...  7.867157
2  COC1=C2C3=CC=C(NC)C(=O)C=C3[C@H1](CCC2=CC(OC)=...  7.785028
3  COC1=C2C3=CC=C(NC)C(=O)C=C3[C@H1](CCC2=CC(OC)=...  7.742135
4  COC1=CC2=CC=C(NC)C(C=C2[C@@H1](N3C=C(N=N3)CN)C...  6.789342
```

|   | Predicted BALB/3T3 | Predicted LoVo |
|---|--------------------|----------------|
| 0 | 7.961224           | 8.209224       |
| 1 | 7.934181           | 7.866056       |
| 2 | 7.407610           | 7.379055       |
| 3 | 7.568620           | 8.016140       |
| 4 | 7.974253           | 8.730218       |

## 5 LoVo\_DX

```
[38]: ## The best model is: Random Forest (correlation_threshold = 0.63, 5 features,
      ↪ 14 estimators, random_state=42)
```

```
[39]: target = 'LoVo/DX'
data = load_prepared_data[list(load_prepared_data.columns)[0:-10]]
data[target] = load_prepared_data[load_prepared_data.columns[-2]]
data.head()
```

```
[39]:
```

|   | AATS0Z    | AATS0are | AATS0d   | AATS0dv  | AATS0i     | AATS0m    | AATS0p   | \ |
|---|-----------|----------|----------|----------|------------|-----------|----------|---|
| 0 | 25.090909 | 6.046518 | 3.109091 | 6.662626 | 160.775045 | 99.075564 | 1.555512 |   |
| 1 | 24.448276 | 6.008422 | 3.051724 | 6.386973 | 161.021674 | 96.473315 | 1.538471 |   |
| 2 | 23.868852 | 5.974074 | 3.000000 | 6.138434 | 161.244045 | 94.127025 | 1.523105 |   |
| 3 | 23.868852 | 5.974074 | 3.032787 | 6.171220 | 161.244045 | 94.127025 | 1.523105 |   |
| 4 | 23.343750 | 5.942945 | 2.953125 | 5.913194 | 161.445569 | 92.000700 | 1.509180 |   |

|   | AATS0pe  | AATS0s   | AATS0se  | ... | piPC10   | piPC2    | piPC3    | piPC4    | \ |
|---|----------|----------|----------|-----|----------|----------|----------|----------|---|
| 0 | 6.126680 | 3.435416 | 7.629859 | ... | 7.999655 | 4.266195 | 4.915408 | 5.516700 |   |
| 1 | 6.088791 | 3.330998 | 7.596891 | ... | 8.018726 | 4.280132 | 4.922714 | 5.520711 |   |
| 2 | 6.054630 | 3.236850 | 7.567166 | ... | 8.028799 | 4.293878 | 4.929967 | 5.524706 |   |
| 3 | 6.054630 | 3.257798 | 7.567166 | ... | 8.037440 | 4.307438 | 4.929967 | 5.524706 |   |
| 4 | 6.023670 | 3.151529 | 7.540228 | ... | 8.034892 | 4.307438 | 4.937168 | 5.528685 |   |

|   | piPC5    | piPC6    | piPC7    | piPC8    | piPC9    | LoVo/DX  |
|---|----------|----------|----------|----------|----------|----------|
| 0 | 6.098566 | 6.595759 | 6.979116 | 7.337313 | 7.681445 | 7.260428 |
| 1 | 6.103048 | 6.601209 | 6.985613 | 7.349442 | 7.695531 | 7.507240 |
| 2 | 6.105281 | 6.603923 | 6.989306 | 7.353932 | 7.704023 | 7.747147 |
| 3 | 6.107510 | 6.606629 | 6.992068 | 7.361425 | 7.709420 | 7.991400 |
| 4 | 6.107510 | 6.605277 | 6.991148 | 7.356489 | 7.707175 | 7.109020 |

[5 rows x 1212 columns]

```
[40]: print(data.shape)
data = data.dropna()
```

(120, 1212)

```
[41]: model, train_r2_, test_r2_, hist1, hist2, target_column_name,
      ↪ training_data_RMSE, test_data_RMSE = pred_model.
      ↪ prepare_data_and_create_model(molecular_descriptors_df=data,
      ↪
      ↪ correlation_threshold=0.63,
      ↪
      ↪ standardization=False,
      ↪
      ↪ model_type='RandomForestRegressor',
      ↪
      ↪ n_estimators=14,
      ↪
      ↪ target_column_name = target,
      ↪
      ↪ random_state=42,
      ↪
      ↪ train_test_split_=True,
      ↪
      ↪ verbose=True)
print("R^2 score: " + str(r2_score(data[target], model.
      ↪ predict(data[hist2['molecular descriptor name']]))))
print("Mean squared error: "+str(mean_squared_error(data[target], model.
      ↪ predict(data[hist2['molecular descriptor name']]))))
print('Mean absolute error: ' + str(mean_absolute_error(data[target], model.
      ↪ predict(data[hist2['molecular descriptor name']]))))
print("Root Mean Square Error: "+ str(math.
      ↪ sqrt(mean_squared_error(data[target], model.predict(data[hist2['molecular_
      ↪ descriptor name']]))))
```

I am not doing standardization...

|   | molecular descriptor name |  |
|---|---------------------------|--|
| 0 | AATS0Z                    |  |
| 1 | AATS0are                  |  |
| 2 | AATS0d                    |  |
| 3 | AATS0dv                   |  |
| 4 | AATS0i                    |  |

  

|   | molecular descriptor name | corr_value |
|---|---------------------------|------------|
| 0 | AATS0Z                    | 0.018677   |
| 1 | AATS0are                  | -0.341313  |
| 2 | AATS0d                    | -0.123443  |
| 3 | AATS0dv                   | -0.265670  |
| 4 | AATS0i                    | -0.428929  |

  

|   | molecular descriptor name | corr_value | absolute correlation value |
|---|---------------------------|------------|----------------------------|
| 0 | AATS0Z                    | 0.018677   | 0.018677                   |
| 1 | AATS0are                  | -0.341313  | 0.341313                   |
| 2 | AATS0d                    | -0.123443  | 0.123443                   |
| 3 | AATS0dv                   | -0.265670  | 0.265670                   |



|      |                           |            |                            |
|------|---------------------------|------------|----------------------------|
| 4    | AATSOi                    | -0.428929  | 0.428929                   |
|      | molecular descriptor name | corr_value | absolute correlation value |
| 556  | GATS2c                    | 0.652245   | 0.652245                   |
| 696  | MATS2c                    | -0.638624  | 0.638624                   |
| 851  | NdssC                     | -0.647960  | 0.647960                   |
| 881  | RNCG                      | 0.663041   | 0.663041                   |
| 1022 | TopoPSA(NO)               | -0.635724  | 0.635724                   |
|      | molecular descriptor name | corr_value | absolute correlation value |
| 556  | GATS2c                    | 0.652245   | 0.652245                   |
| 696  | MATS2c                    | -0.638624  | 0.638624                   |
| 851  | NdssC                     | -0.647960  | 0.647960                   |
| 881  | RNCG                      | 0.663041   | 0.663041                   |
| 1022 | TopoPSA(NO)               | -0.635724  | 0.635724                   |

The model used is: RandomForest...

Return the coefficient of determination of the prediction:

0.6249884711849997

R<sup>2</sup> score: 0.923535411990395

Correlation coefficient: 0.9610074984048745

Test data - unseen during training:

R<sup>2</sup> score: 0.6249884711849997

Correlation coefficient: 0.790562123545645

[6.1547412 7.13053465 7.59814903 4.84627594 6.51359131 6.38096941

7.25966313 7.13539448 6.42648883 7.85741914 5.76764772 6.07409969

7.60026782 6.41520183 7.16325348 6.0335248 ]

114 6.026872

10 7.856985

4 7.109020

95 5.200659

111 6.853872

79 6.327902

44 7.638272

47 7.022276

107 6.000000

11 7.250264

61 5.481486

56 6.657577

0 7.260428

92 7.141463

18 6.630970

78 6.244125

Name: LoVo/DX, dtype: float64

Training Root Mean Square Error: 0.26590821262128245

Testing Root Mean Square Error: 0.4420939409154765

R<sup>2</sup> score: 0.8967153598641877

Mean squared error: 0.08953583792506502

Mean absolute error: 0.21690719242962295

Root Mean Square Error: 0.2992253965242005

```
[42]: # save
joblib.dump(model, "Random_forest/random_forest_model_14_estimators_LoVo_DX.
↪joblib")
```

```
[42]: ['Random_forest/random_forest_model_14_estimators_LoVo_DX.joblib']
```

```
[43]: for x, decision_tree in enumerate(model.estimators_):
plt.figure(figsize=(10,8), dpi=150)
plot_tree(decision_tree, feature_names=list(hist2['molecular descriptor_
↪name']),
filled=True)
plt.savefig('Random_forest/random_forest_14_'+str(x)+'_model_LoVo_DX.
↪pdf',bbox_inches = "tight")
```

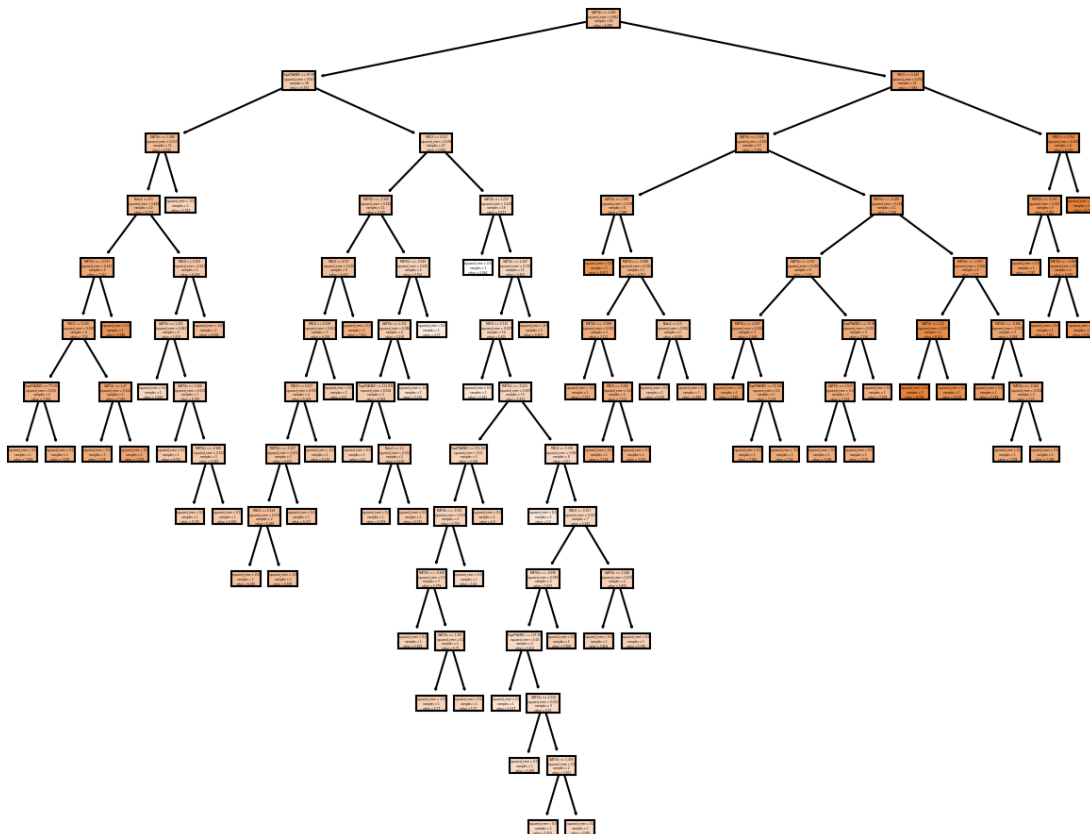

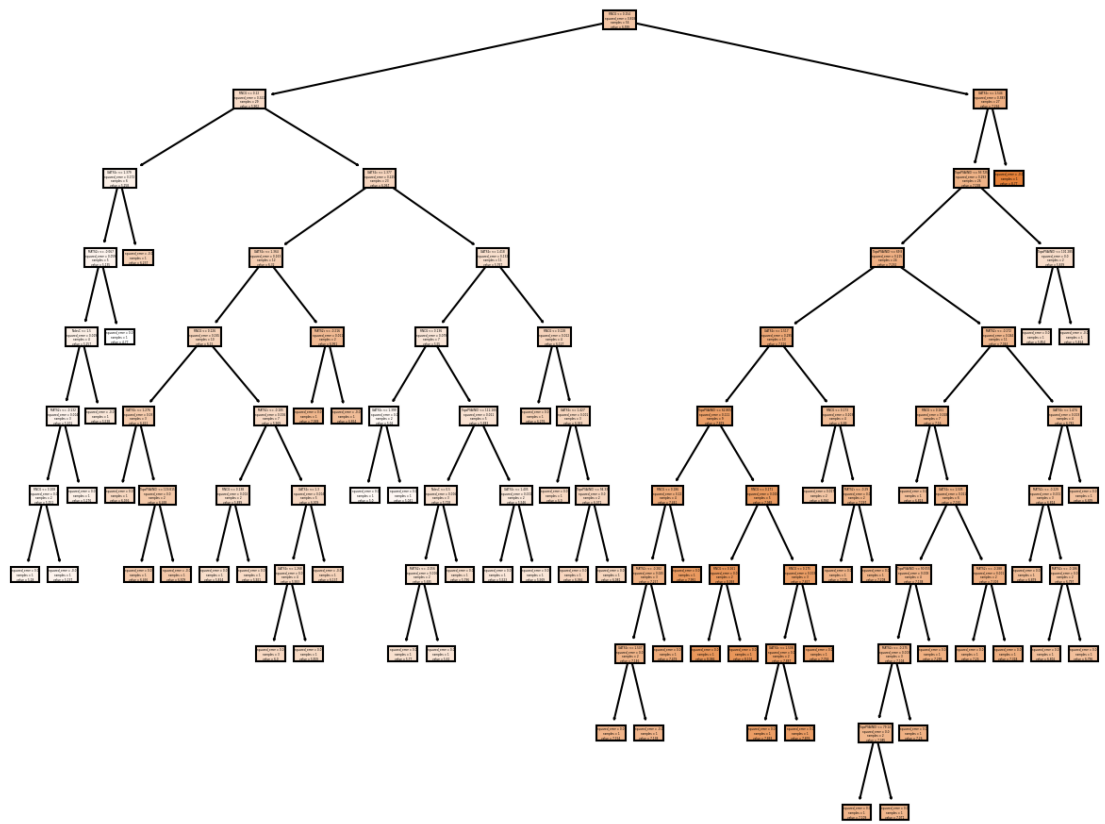

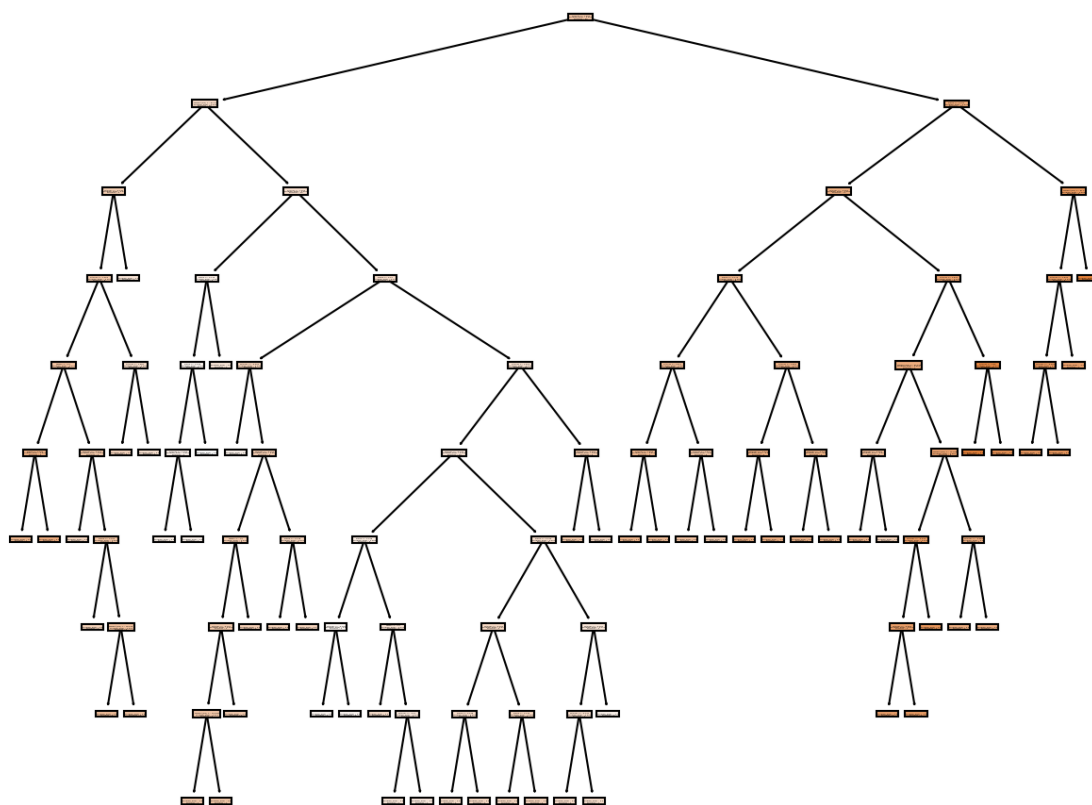

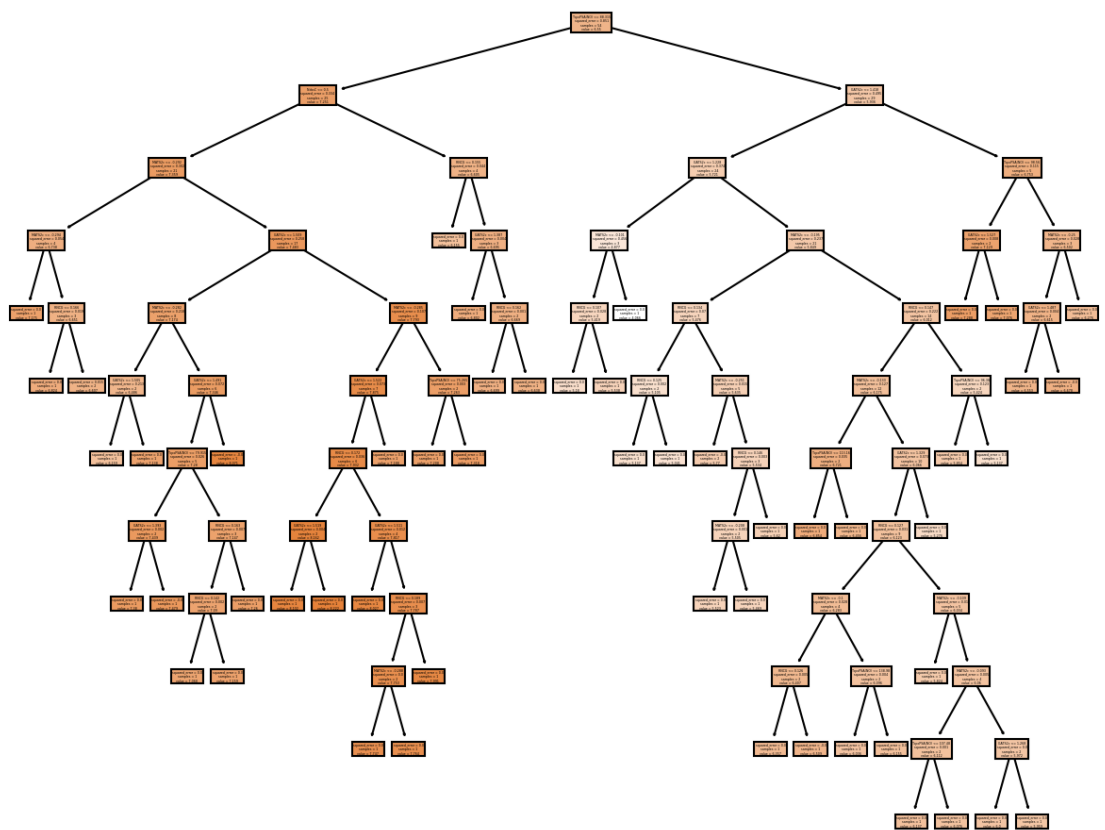

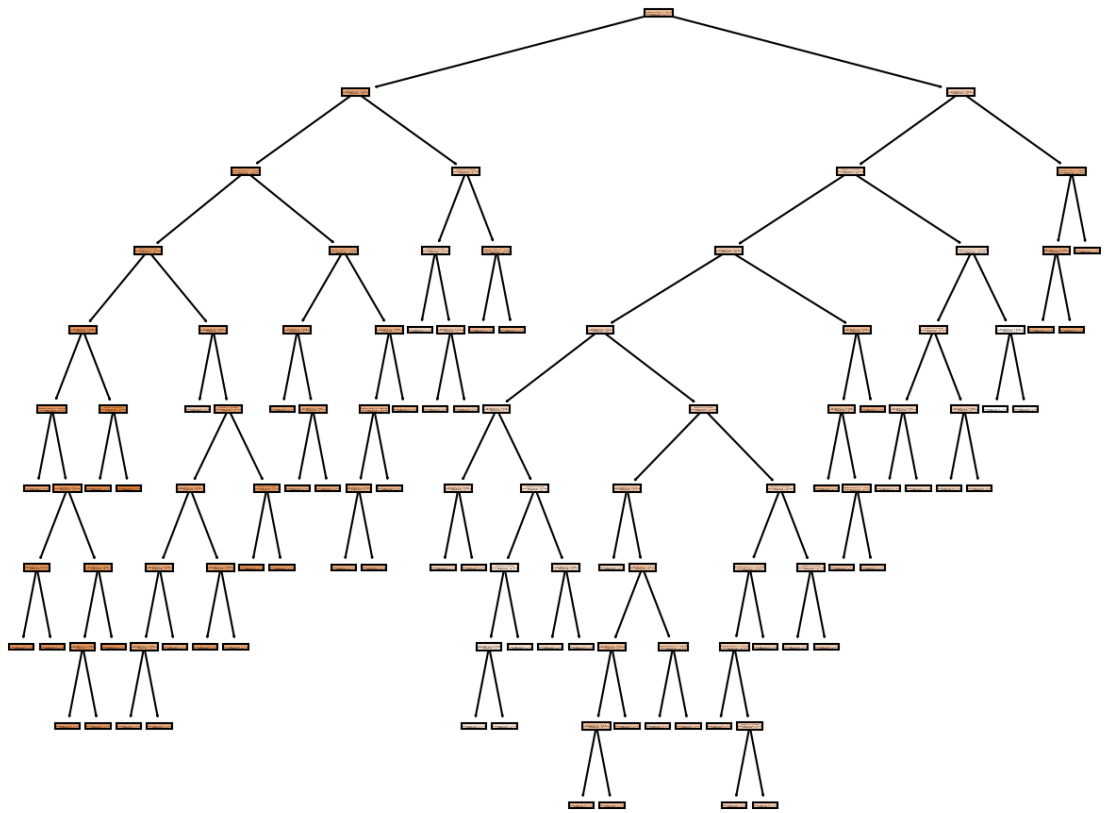

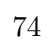

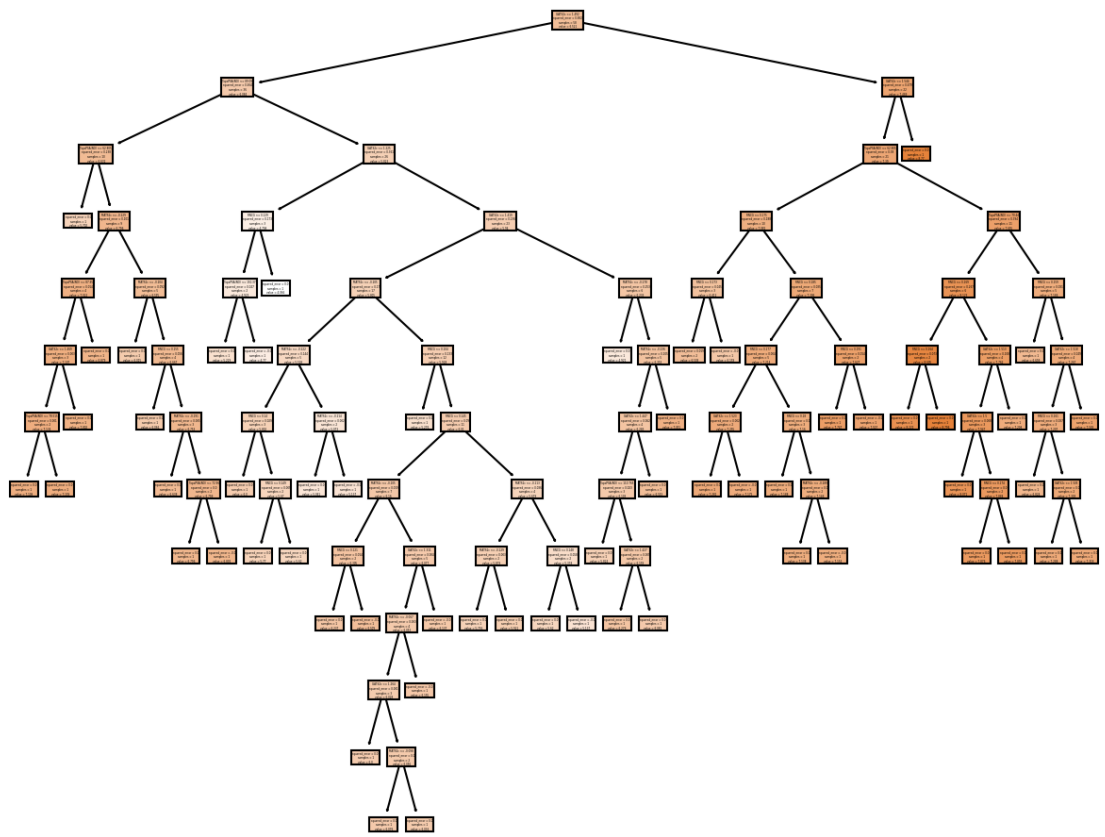



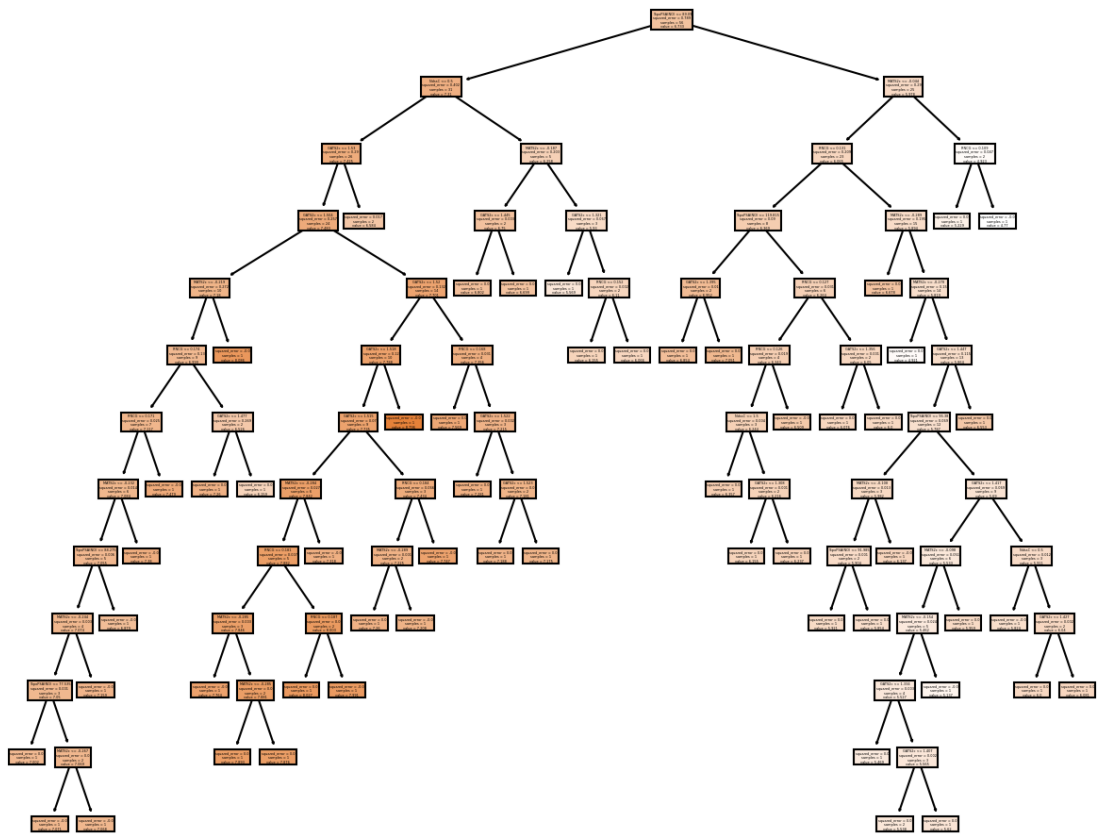

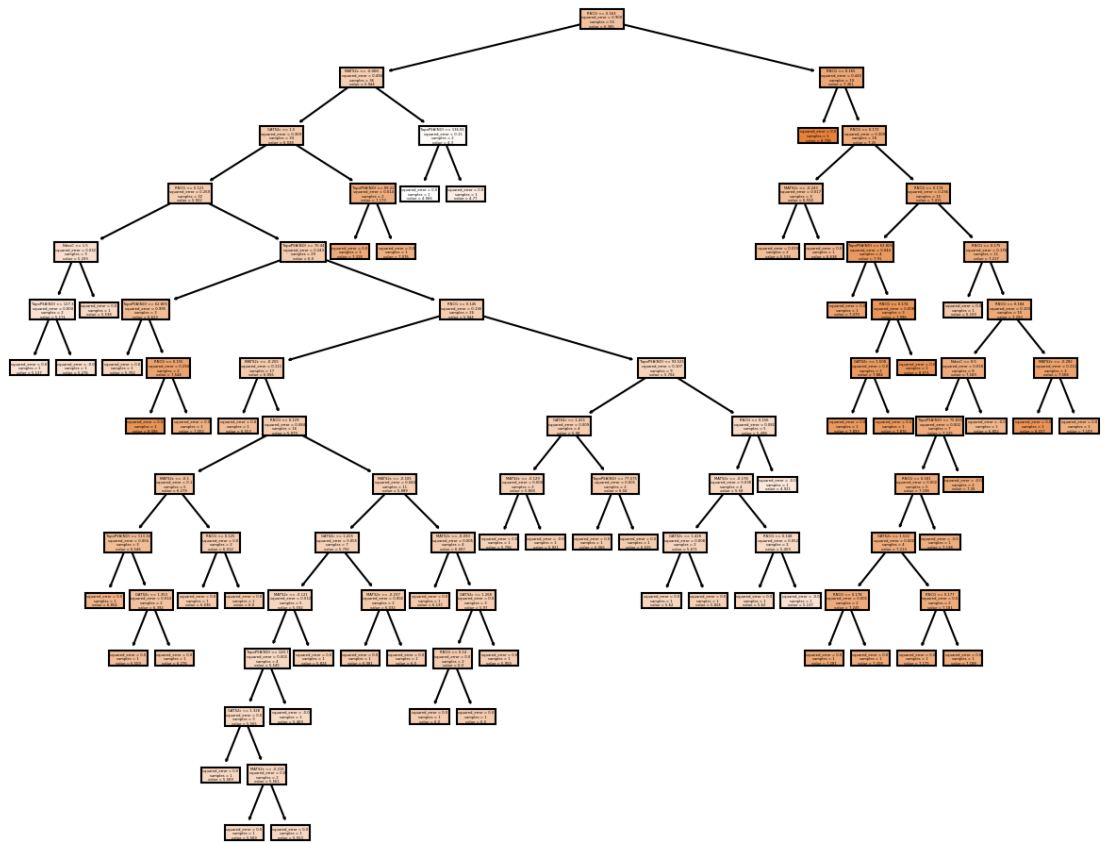

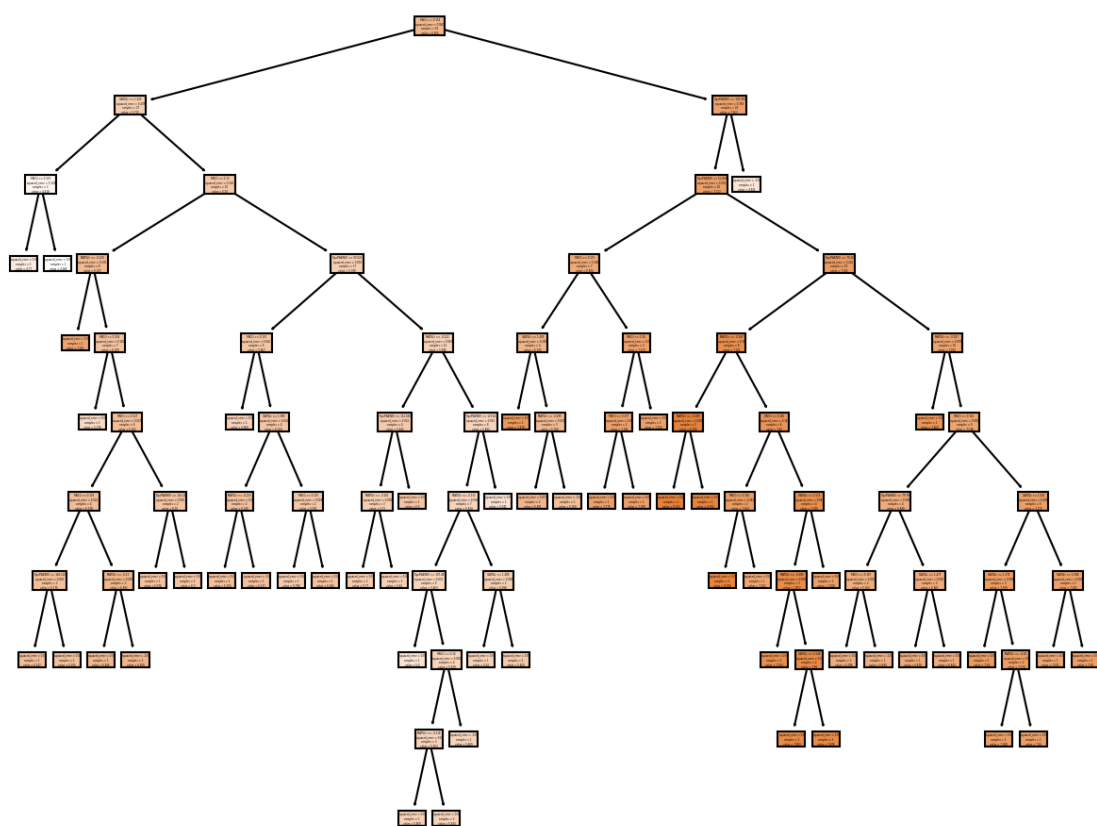

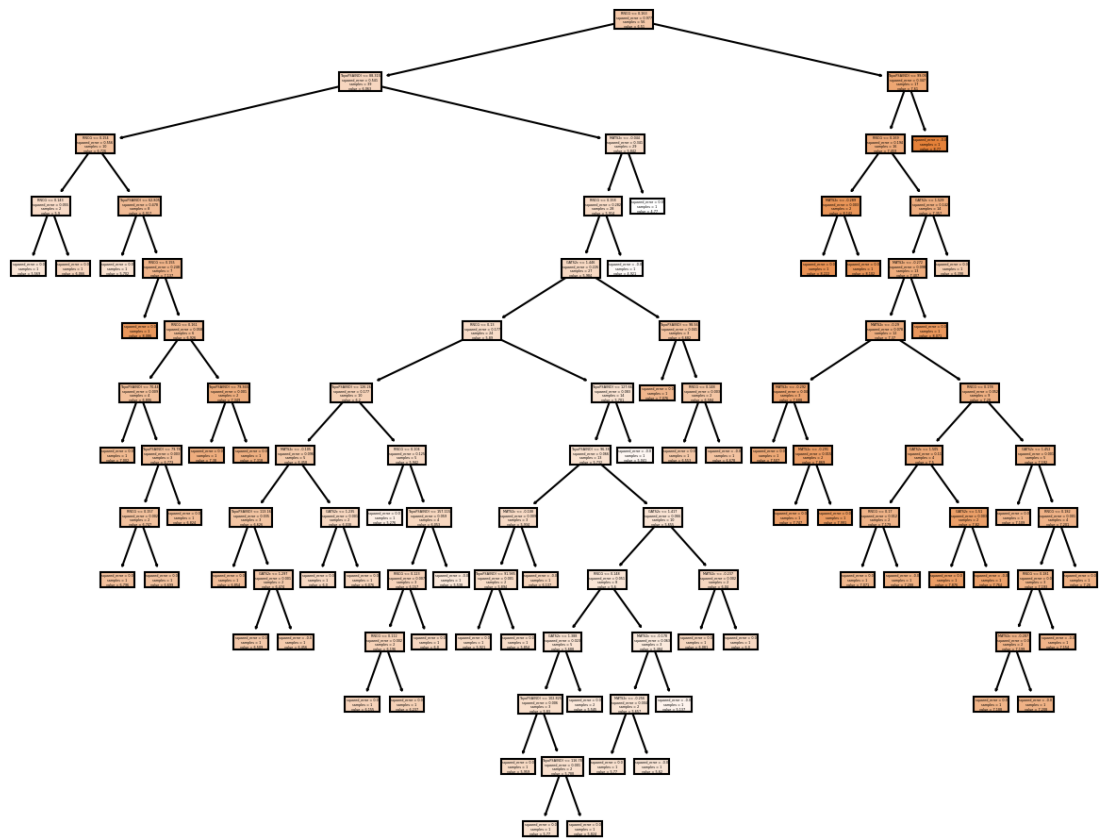

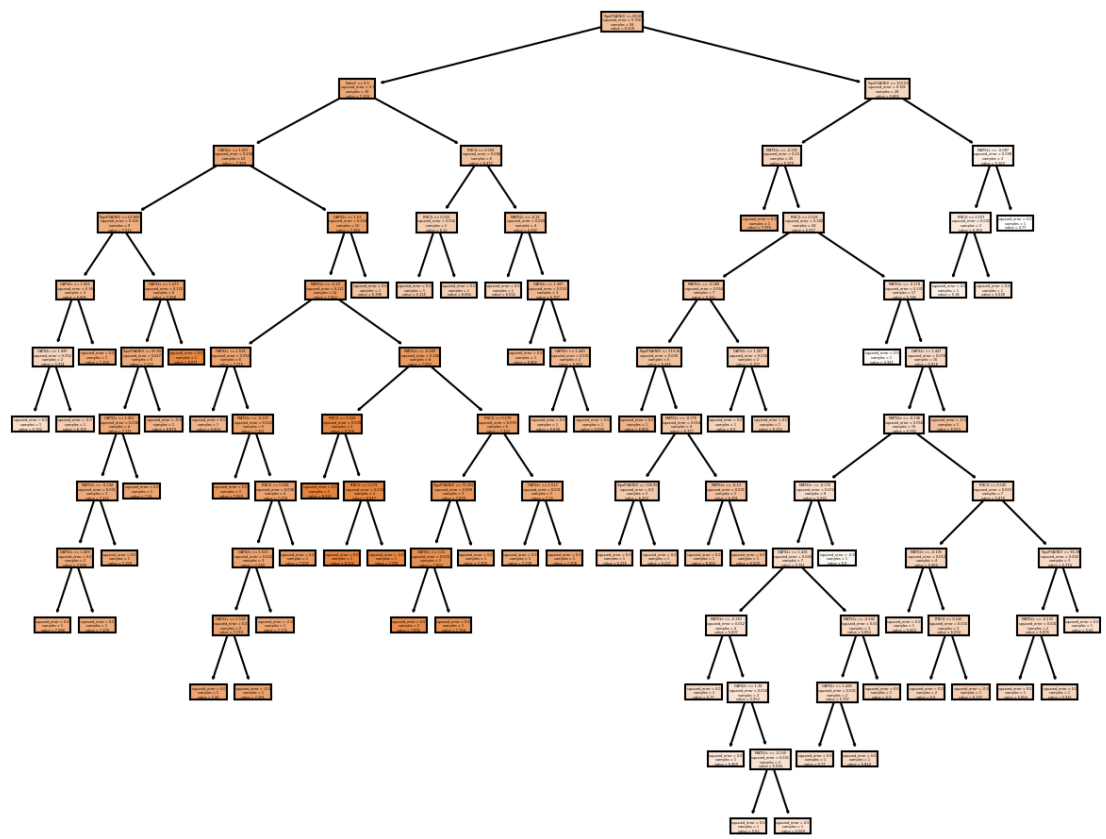

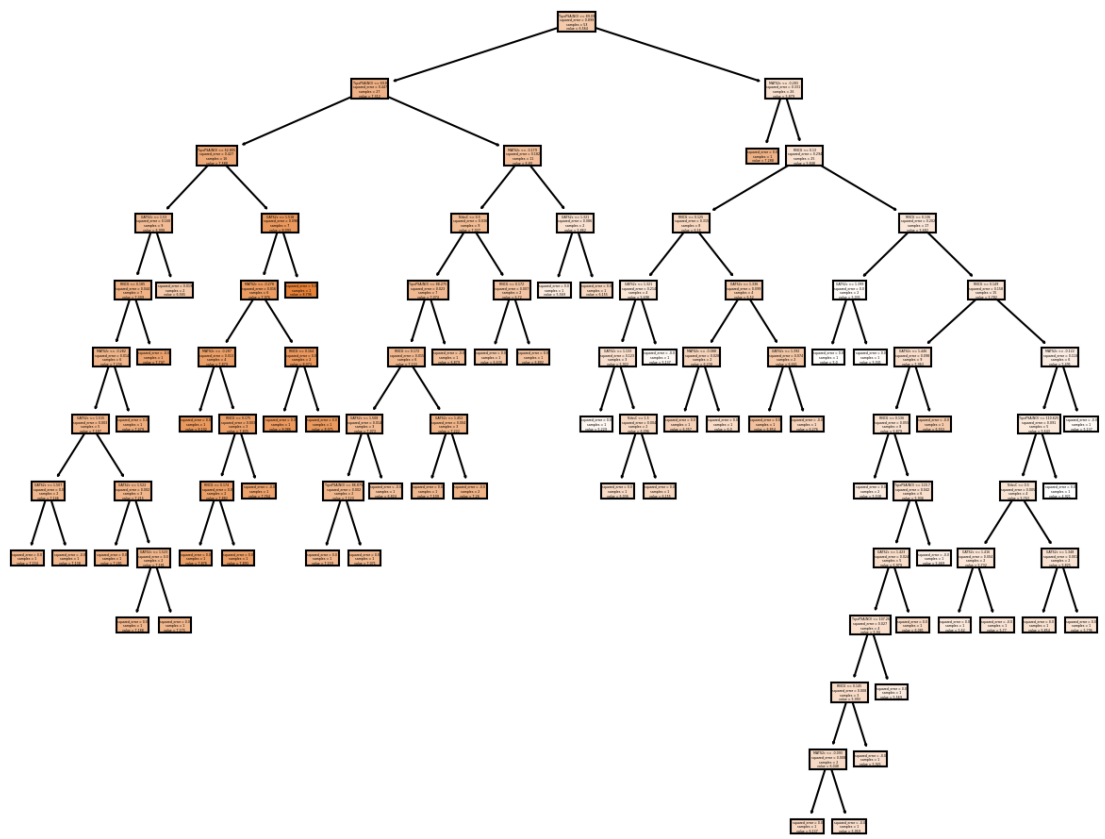

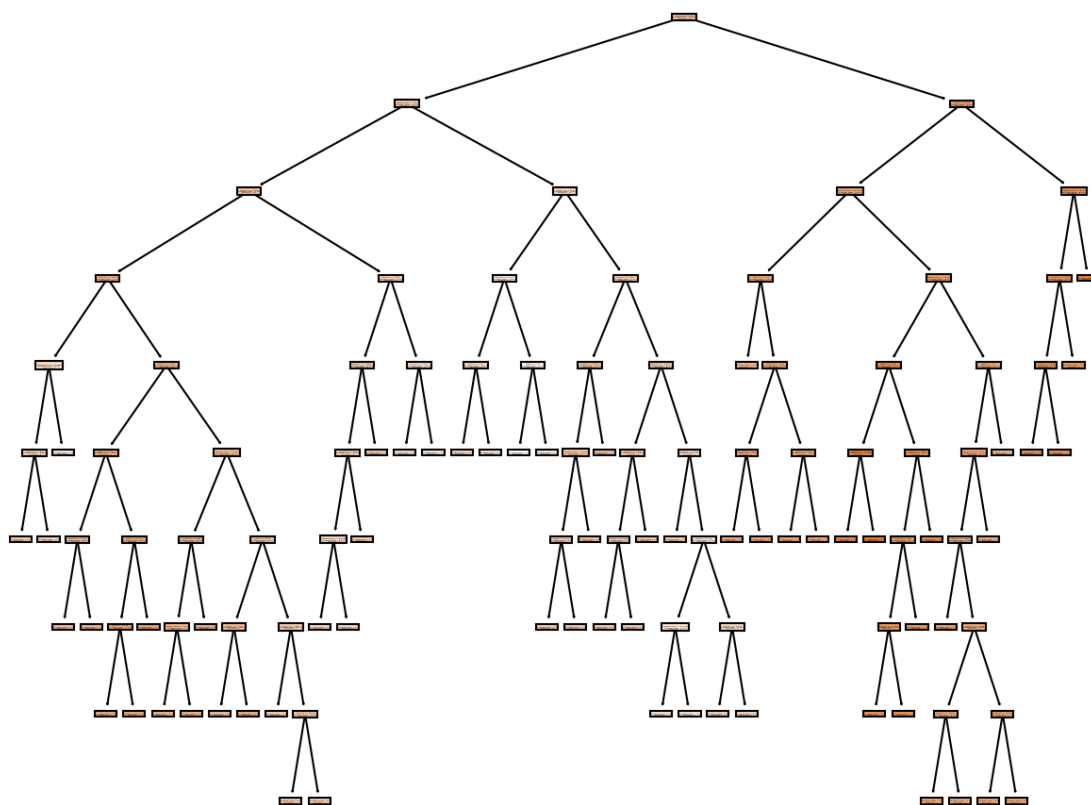

```
[44]: hist2
```

```
[44]:
```

|      | molecular descriptor name | corr_value | absolute correlation value |
|------|---------------------------|------------|----------------------------|
| 556  | GATS2c                    | 0.652245   | 0.652245                   |
| 696  | MATS2c                    | -0.638624  | 0.638624                   |
| 851  | NdssC                     | -0.647960  | 0.647960                   |
| 881  | RNCG                      | 0.663041   | 0.663041                   |
| 1022 | TopoPSA(NO)               | -0.635724  | 0.635724                   |

```
[45]: predicted_activity = model.predict(molecular_descriptors[hist2['molecular_
↳descriptor name']])
```

```
[46]: save_to_df['Predicted LoVo/DX'] = predicted_activity
```

```
[47]: save_to_df.head()
```

```
[47]:
```

|   | SMILES                                            | Predicted A549 \ |
|---|---------------------------------------------------|------------------|
| 0 | COC1=C2C3=CC=C(NC)C(=O)C=C3[C@H1](CCC2=CC(OC)=... | 8.078406         |
| 1 | COC1=C2C3=CC=C(NC)C(=O)C=C3[C@H1](CCC2=CC(OC)=... | 7.867157         |

|   |                                                   |          |
|---|---------------------------------------------------|----------|
| 2 | COC1=C2C3=CC=C(NC)C(=O)C=C3[C@H1](CCC2=CC(OC)=... | 7.785028 |
| 3 | COC1=C2C3=CC=C(NC)C(=O)C=C3[C@H1](CCC2=CC(OC)=... | 7.742135 |
| 4 | COC1=CC2=CC=C(NC)C(C=C2[C@@H1](N3C=C(N=N3)CN)C... | 6.789342 |

|   | Predicted BALB/3T3 | Predicted LoVo | Predicted LoVo/DX |
|---|--------------------|----------------|-------------------|
| 0 | 7.961224           | 8.209224       | 7.025589          |
| 1 | 7.934181           | 7.866056       | 7.480642          |
| 2 | 7.407610           | 7.379055       | 7.617192          |
| 3 | 7.568620           | 8.016140       | 6.634258          |
| 4 | 7.974253           | 8.730218       | 5.695813          |

## 6 MCF-7

```
[48]: ## The best model is: Random Forest (correlation_threshold = 0.51, 4 features,
      ↪ 3 estimators, random_state=15)
```

```
[49]: target = 'MCF-7'
data = load_prepared_data[list(load_prepared_data.columns)[0:-10]]
data[target] = load_prepared_data[load_prepared_data.columns[-4]]
data.head()
```

```
[49]:
```

|   | AATS0Z    | AATS0are | AATS0d   | AATS0dv  | AATS0i     | AATS0m    | AATS0p \ |
|---|-----------|----------|----------|----------|------------|-----------|----------|
| 0 | 25.090909 | 6.046518 | 3.109091 | 6.662626 | 160.775045 | 99.075564 | 1.555512 |
| 1 | 24.448276 | 6.008422 | 3.051724 | 6.386973 | 161.021674 | 96.473315 | 1.538471 |
| 2 | 23.868852 | 5.974074 | 3.000000 | 6.138434 | 161.244045 | 94.127025 | 1.523105 |
| 3 | 23.868852 | 5.974074 | 3.032787 | 6.171220 | 161.244045 | 94.127025 | 1.523105 |
| 4 | 23.343750 | 5.942945 | 2.953125 | 5.913194 | 161.445569 | 92.000700 | 1.509180 |

|   | AATS0pe  | AATS0s   | AATS0se  | ... | piPC10   | piPC2    | piPC3    | piPC4 \  |
|---|----------|----------|----------|-----|----------|----------|----------|----------|
| 0 | 6.126680 | 3.435416 | 7.629859 | ... | 7.999655 | 4.266195 | 4.915408 | 5.516700 |
| 1 | 6.088791 | 3.330998 | 7.596891 | ... | 8.018726 | 4.280132 | 4.922714 | 5.520711 |
| 2 | 6.054630 | 3.236850 | 7.567166 | ... | 8.028799 | 4.293878 | 4.929967 | 5.524706 |
| 3 | 6.054630 | 3.257798 | 7.567166 | ... | 8.037440 | 4.307438 | 4.929967 | 5.524706 |
| 4 | 6.023670 | 3.151529 | 7.540228 | ... | 8.034892 | 4.307438 | 4.937168 | 5.528685 |

|   | piPC5    | piPC6    | piPC7    | piPC8    | piPC9    | MCF-7    |
|---|----------|----------|----------|----------|----------|----------|
| 0 | 6.098566 | 6.595759 | 6.979116 | 7.337313 | 7.681445 | 7.987163 |
| 1 | 6.103048 | 6.601209 | 6.985613 | 7.349442 | 7.695531 | 7.920819 |
| 2 | 6.105281 | 6.603923 | 6.989306 | 7.353932 | 7.704023 | 7.913640 |
| 3 | 6.107510 | 6.606629 | 6.992068 | 7.361425 | 7.709420 | 7.946922 |
| 4 | 6.107510 | 6.605277 | 6.991148 | 7.356489 | 7.707175 | 7.032920 |

[5 rows x 1212 columns]

```
[50]: model, train_r2_, test_r2_, hist1, hist2, target_column_name,
      ↪ training_data_RMSE, test_data_RMSE = pred_model.
      ↪ prepare_data_and_create_model(molecular_descriptors_df=data,
```



```

↪ correlation_threshold=0.51,
↪
↪ standardization=False,
↪
↪ model_type='RandomForestRegressor',
↪
↪ n_estimators=3,
↪
↪ target_column_name = target,
↪
↪ random_state=15,
↪
↪ train_test_split=True,
↪
↪ verbose=True)
print("R^2 score: " + str(r2_score(data[target], model.
↪ predict(data[hist2['molecular descriptor name']]))))
print("Mean squared error: "+str(mean_squared_error(data[target], model.
↪ predict(data[hist2['molecular descriptor name']]))))
print('Mean absolute error: ' + str(mean_absolute_error(data[target], model.
↪ predict(data[hist2['molecular descriptor name']]))))
print("Root Mean Square Error: " + str(math.
↪ sqrt(mean_squared_error(data[target], model.predict(data[hist2['molecular_
↪ descriptor name']]))))

```

I am not doing standardization...

|     | molecular descriptor name |            |                            |
|-----|---------------------------|------------|----------------------------|
| 0   | AATS0Z                    |            |                            |
| 1   | AATS0are                  |            |                            |
| 2   | AATS0d                    |            |                            |
| 3   | AATS0dv                   |            |                            |
| 4   | AATS0i                    |            |                            |
|     | molecular descriptor name | corr_value |                            |
| 0   | AATS0Z                    | -0.038502  |                            |
| 1   | AATS0are                  | -0.120847  |                            |
| 2   | AATS0d                    | 0.041648   |                            |
| 3   | AATS0dv                   | -0.115899  |                            |
| 4   | AATS0i                    | 0.191765   |                            |
|     | molecular descriptor name | corr_value | absolute correlation value |
| 0   | AATS0Z                    | -0.038502  | 0.038502                   |
| 1   | AATS0are                  | -0.120847  | 0.120847                   |
| 2   | AATS0d                    | 0.041648   | 0.041648                   |
| 3   | AATS0dv                   | -0.115899  | 0.115899                   |
| 4   | AATS0i                    | 0.191765   | 0.191765                   |
|     | molecular descriptor name | corr_value | absolute correlation value |
| 226 | AMID_0                    | -0.520578  | 0.520578                   |

|      |             |           |          |
|------|-------------|-----------|----------|
| 505  | EState_VSA5 | -0.578904 | 0.578904 |
| 506  | EState_VSA6 | 0.519794  | 0.519794 |
| 791  | MDEO-12     | -0.525441 | 0.525441 |
| 1211 | MCF-7       | 1.000000  | 1.000000 |

|     | molecular descriptor name | corr_value | absolute correlation value |
|-----|---------------------------|------------|----------------------------|
| 226 | AMID_0                    | -0.520578  | 0.520578                   |
| 505 | EState_VSA5               | -0.578904  | 0.578904                   |
| 506 | EState_VSA6               | 0.519794   | 0.519794                   |
| 791 | MDEO-12                   | -0.525441  | 0.525441                   |

The model used is: RandomForest...

Return the coefficient of determination of the prediction:

0.6142840305325452

R<sup>2</sup> score: 0.819378937516738

Correlation coefficient: 0.9051955244679118

Test data - unseen during training:

R<sup>2</sup> score: 0.6142840305325452

Correlation coefficient: 0.7837627386732194

[7.51646048 5.63977394 6.68863667 8.06699682 8.02507489 7.52053863  
8.11761239 7.30778129 7.59968192 8.0589289 7.82677649 8.48554246  
8.51560134 7.36599904 7.51207137 8.08489178 6.30627483 5.35904447]

102 7.958607  
38 6.022276  
8 5.949079  
109 8.086186  
11 8.013228  
51 8.000000  
88 8.119186  
21 8.113509  
82 7.982967  
98 7.795880  
58 7.677781  
64 8.619789  
74 8.327902  
103 8.376751  
91 9.154902  
43 7.958607  
25 4.949659  
30 6.010550

Name: MCF-7, dtype: float64

Training Root Mean Square Error: 0.39541164003880247

Testing Root Mean Square Error: 0.6692126081310851

R<sup>2</sup> score: 0.7801557253334048

Mean squared error: 0.20007463754869056

Mean absolute error: 0.2585070583354094

Root Mean Square Error: 0.4472970350323044

```
[51]: # save
joblib.dump(model, "Random_forest/random_forest_model_3_estimators_MCF-7.
↳joblib")
```

```
[51]: ['Random_forest/random_forest_model_3_estimators_MCF-7.joblib']
```

```
[52]: for x, decision_tree in enumerate(model.estimators_):
plt.figure(figsize=(10,8), dpi=150)
plot_tree(decision_tree, feature_names=list(hist2['molecular descriptor_
↳name']),
filled=True)
plt.savefig('Random_forest/random_forest_3_'+str(x)+'_model_MCF-7.
↳pdf',bbox_inches = "tight")
```

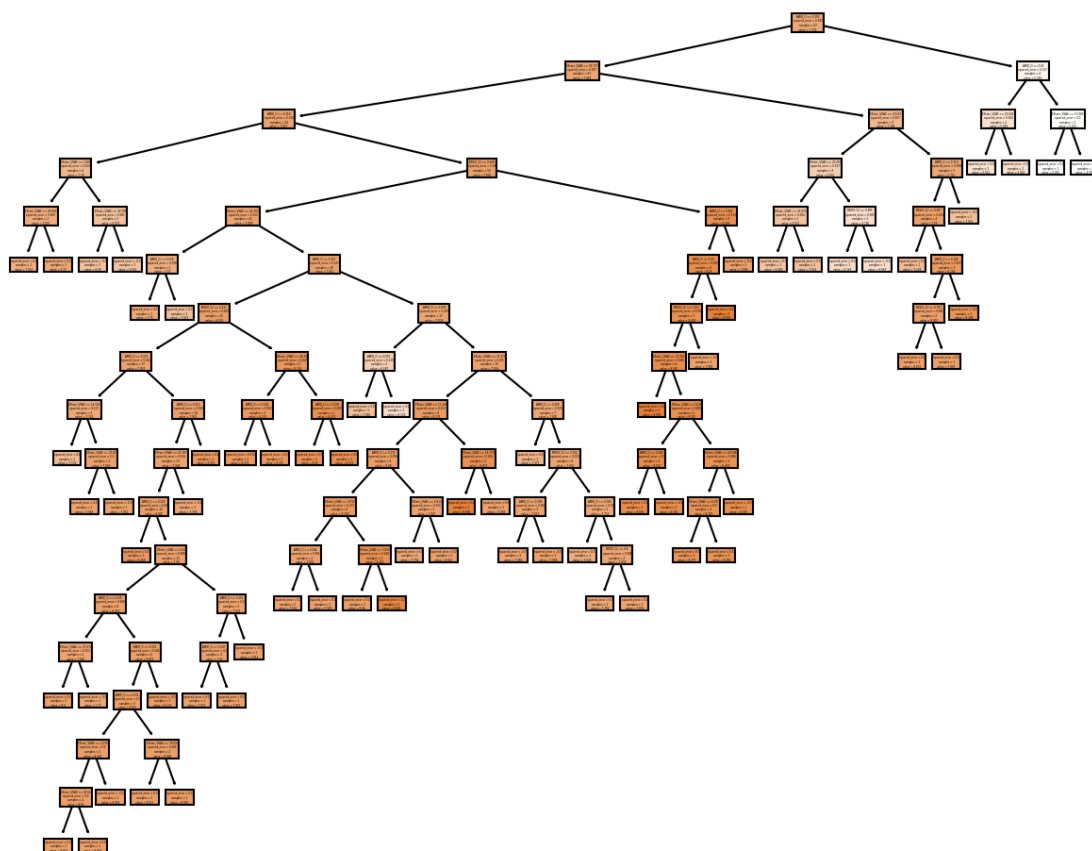

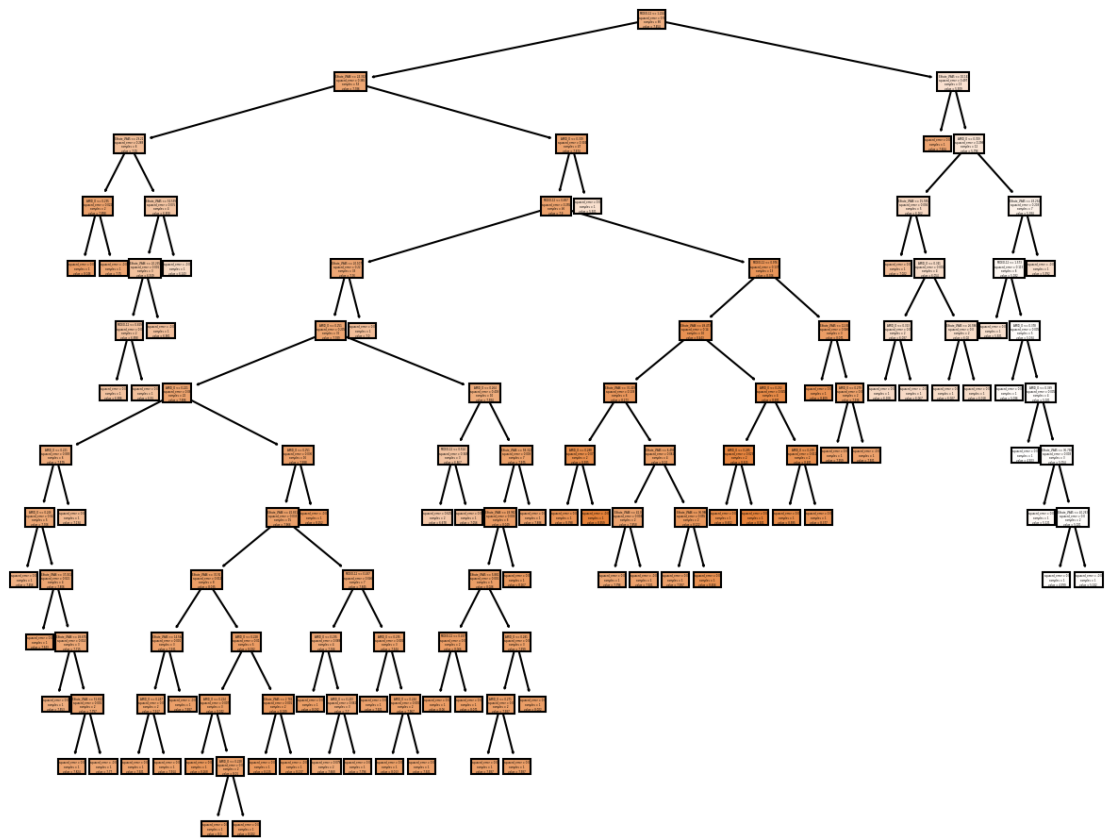

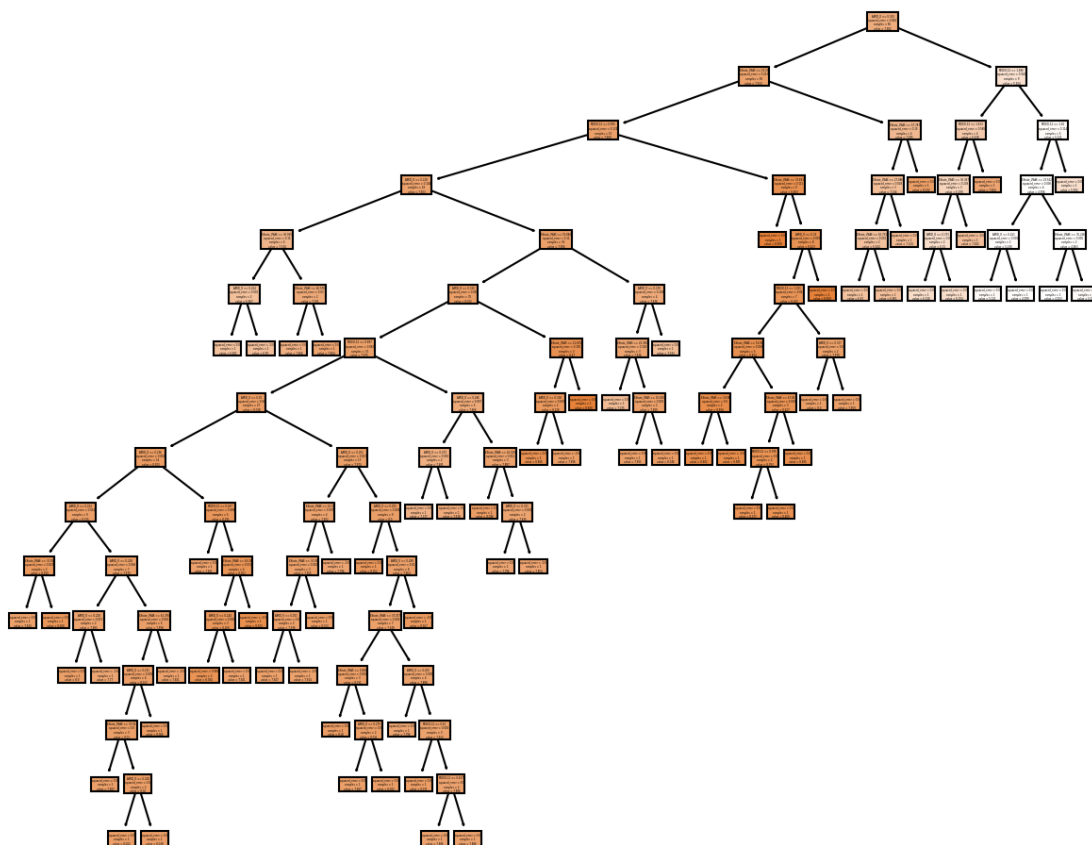

```
[53]: hist2
```

```
[53]:      molecular descriptor name  corr_value  absolute correlation value
226                AMID_0      -0.520578                0.520578
505             EState_VSA5      -0.578904                0.578904
506             EState_VSA6       0.519794                0.519794
791              MDE0-12      -0.525441                0.525441
```

```
[54]: predicted_activity = model.predict(molecular_descriptors[hist2['molecular_
↳descriptor name']])
```

```
[55]: save_to_df['Predicted MCF-7'] = predicted_activity
```

```
[56]: save_to_df.head()
```

```
[56]:      SMILES  Predicted A549 \
0  COC1=C2C3=CC=C(NC)C(=O)C=C3[C@H1](CCC2=CC(OC)=...  8.078406
1  COC1=C2C3=CC=C(NC)C(=O)C=C3[C@H1](CCC2=CC(OC)=...  7.867157
2  COC1=C2C3=CC=C(NC)C(=O)C=C3[C@H1](CCC2=CC(OC)=...  7.785028
```

|   |                                                                |          |
|---|----------------------------------------------------------------|----------|
| 3 | <chem>COC1=C2C3=CC=C(NC)C(=O)C=C3[C@H1](CCC2=CC(OC)=...</chem> | 7.742135 |
| 4 | <chem>COC1=CC2=CC=C(NC)C(C=C2[C@@H1](N3C=C(N=N3)CN)C...</chem> | 6.789342 |

|   | Predicted BALB/3T3 | Predicted LoVo | Predicted LoVo/DX | Predicted MCF-7 |
|---|--------------------|----------------|-------------------|-----------------|
| 0 | 7.961224           | 8.209224       | 7.025589          | 8.077917        |
| 1 | 7.934181           | 7.866056       | 7.480642          | 7.992772        |
| 2 | 7.407610           | 7.379055       | 7.617192          | 8.040999        |
| 3 | 7.568620           | 8.016140       | 6.634258          | 8.267606        |
| 4 | 7.974253           | 8.730218       | 5.695813          | 8.042845        |

```
[57]: save_to_df['A549 [nM]'] = pred_model.inverse_transform(save_to_df['Predicted_
      ↪A549'])
      save_to_df['BALB/3T3 [nM]'] = pred_model.
      ↪inverse_transform(save_to_df['Predicted BALB/3T3'])
      save_to_df['LoVo [nM]'] = pred_model.inverse_transform(save_to_df['Predicted_
      ↪LoVo'])
      save_to_df['LoVo/DX [nM]'] = pred_model.inverse_transform(save_to_df['Predicted_
      ↪LoVo/DX'])
      save_to_df['MCF-7 [nM]'] = pred_model.inverse_transform(save_to_df['Predicted_
      ↪MCF-7'])
      save_to_df.head()
```

|   | SMILES                                                         | Predicted A549 \ |
|---|----------------------------------------------------------------|------------------|
| 0 | <chem>COC1=C2C3=CC=C(NC)C(=O)C=C3[C@H1](CCC2=CC(OC)=...</chem> | 8.078406         |
| 1 | <chem>COC1=C2C3=CC=C(NC)C(=O)C=C3[C@H1](CCC2=CC(OC)=...</chem> | 7.867157         |
| 2 | <chem>COC1=C2C3=CC=C(NC)C(=O)C=C3[C@H1](CCC2=CC(OC)=...</chem> | 7.785028         |
| 3 | <chem>COC1=C2C3=CC=C(NC)C(=O)C=C3[C@H1](CCC2=CC(OC)=...</chem> | 7.742135         |
| 4 | <chem>COC1=CC2=CC=C(NC)C(C=C2[C@@H1](N3C=C(N=N3)CN)C...</chem> | 6.789342         |

  

|   | Predicted BALB/3T3 | Predicted LoVo | Predicted LoVo/DX | Predicted MCF-7 \ |
|---|--------------------|----------------|-------------------|-------------------|
| 0 | 7.961224           | 8.209224       | 7.025589          | 8.077917          |
| 1 | 7.934181           | 7.866056       | 7.480642          | 7.992772          |
| 2 | 7.407610           | 7.379055       | 7.617192          | 8.040999          |
| 3 | 7.568620           | 8.016140       | 6.634258          | 8.267606          |
| 4 | 7.974253           | 8.730218       | 5.695813          | 8.042845          |

  

|   | A549 [nM]  | BALB/3T3 [nM] | LoVo [nM] | LoVo/DX [nM] | MCF-7 [nM] |
|---|------------|---------------|-----------|--------------|------------|
| 0 | 8.348220   | 10.933929     | 6.176982  | 94.278083    | 8.357629   |
| 1 | 13.578222  | 11.636406     | 13.612706 | 33.064228    | 10.167834  |
| 2 | 16.404839  | 39.119200     | 41.777761 | 24.143942    | 9.099151   |
| 3 | 18.107777  | 27.000988     | 9.635175  | 232.135864   | 5.400000   |
| 4 | 162.427093 | 10.610769     | 1.861153  | 2014.589795  | 9.060555   |

```
[58]: save_to_df.to_excel('../Data/Predicted_activities.xlsx')
```

# File 37

```
import pandas as pd
from rdkit import Chem
from rdkit.Chem import Draw
```

```
file = pd.read_excel(r'../Data/Kolchicyna_prepared_data.xlsx')
```

```
file.head()
```

|   | Unnamed: 0 | Publikacja DOI \                                                                                    |
|---|------------|-----------------------------------------------------------------------------------------------------|
| 0 | 0          | <a href="https://doi.org/10.1016/j.bmcl.2021.128382">https://doi.org/10.1016/j.bmcl.2021.128382</a> |
| 1 | 1          | <a href="https://doi.org/10.1016/j.bmcl.2021.128382">https://doi.org/10.1016/j.bmcl.2021.128382</a> |
| 2 | 2          | <a href="https://doi.org/10.1016/j.bmcl.2021.128382">https://doi.org/10.1016/j.bmcl.2021.128382</a> |
| 3 | 3          | <a href="https://doi.org/10.1016/j.bmcl.2021.128382">https://doi.org/10.1016/j.bmcl.2021.128382</a> |
| 4 | 4          | <a href="https://doi.org/10.1016/j.bmcl.2021.128382">https://doi.org/10.1016/j.bmcl.2021.128382</a> |

|   | Numer związku w publikacji \ |
|---|------------------------------|
| 0 | 1                            |
| 1 | 2                            |
| 2 | 3                            |
| 3 | 4                            |
| 4 | 5                            |

|        | SMILES                                                         | Atywność [nM]         |
|--------|----------------------------------------------------------------|-----------------------|
| A549 \ |                                                                |                       |
| 0      | <chem>C0c2c3C1=CC=C(SC)C(=O)C=C1[C@H](CCc3cc(OC)c2OC...</chem> | Atywność [nM]<br>10,8 |
| 1      | <chem>C0c2c3C1=CC=C(SC)C(=O)C=C1[C@H](CCc3cc(OC)c2OC...</chem> | Atywność [nM]<br>11,6 |
| 2      | <chem>C0c2c3C1=CC=C(SC)C(=O)C=C1[C@H](CCc3cc(OC)c2OC...</chem> | Atywność [nM]<br>10,9 |
| 3      | <chem>CC(C)CN[C@H]2CCc3cc(OC)c(OC)c(OC)c3C1=CC=C(SC)...</chem> | Atywność [nM]<br>10,5 |
| 4      | <chem>C0c2c3C1=CC=C(SC)C(=O)C=C1[C@H](CCc3cc(OC)c2OC...</chem> | Atywność [nM]<br>89,5 |

|   | MCF-7 | LoVo | LoVo/DX | BALB/3T3 | A549_float | MCF-7_float | LoVo_float |
|---|-------|------|---------|----------|------------|-------------|------------|
| 0 | 10,3  | 6,5  | 54,9    | 10,2     | 10.8       | 10.3        | 6.5        |
| 1 | 12,0  | 8,5  | 31.1    | 14.3     | 11.6       | 12.0        | 8.5        |
| 2 | 12,2  | 8,8  | 17,9    | 11,7     | 10.9       | 12.2        | 8.8        |
| 3 | 11,3  | 8,5  | 10,2    | 11,0     | 10.5       | 11.3        | 8.5        |
| 4 | 92,7  | 52,8 | 77,8    | 99,4     | 89.5       | 92.7        | 52.8       |

|   | LoVo/DX_float | BALB/3T3_float |
|---|---------------|----------------|
| 0 | 54.9          | 10.2           |
| 1 | 31.1          | 14.3           |
| 2 | 17.9          | 11.7           |
| 3 | 10.2          | 11.0           |
| 4 | 77.8          | 99.4           |

```

from rdkit import Chem
from rdkit.Chem import Draw
from rdkit.Chem.Draw import IPythonConsole
from rdkit.Chem import rdFMCS
from rdkit.Chem.Draw import rdDepictor
rdDepictor.SetPreferCoordGen(True)
#IPythonConsole.drawOptions.minFontSize=20
def view_difference(mol1, mol2):
    mcs = rdFMCS.FindMCS([mol1,mol2])
    mcs_mol = Chem.MolFromSmarts(mcs.smartsString)
    match1 = mol1.GetSubstructMatch(mcs_mol)
    target_atm1 = []
    for atom in mol1.GetAtoms():
        if atom.GetIdx() not in match1:
            target_atm1.append(atom.GetIdx())
    match2 = mol2.GetSubstructMatch(mcs_mol)
    target_atm2 = []
    for atom in mol2.GetAtoms():
        if atom.GetIdx() not in match2:
            target_atm2.append(atom.GetIdx())
    return Draw.MolsToGridImage([mol1,
mol2],highlightAtomLists=[target_atm1, target_atm2]) #, useSVG=True

mol1 = Chem.MolFromSmiles(file['SMILES'][0])
mol2 = Chem.MolFromSmiles('C1Cc2ccccc2C2=CC=CCC=C2C1')

view_difference(mol1,mol2)

```

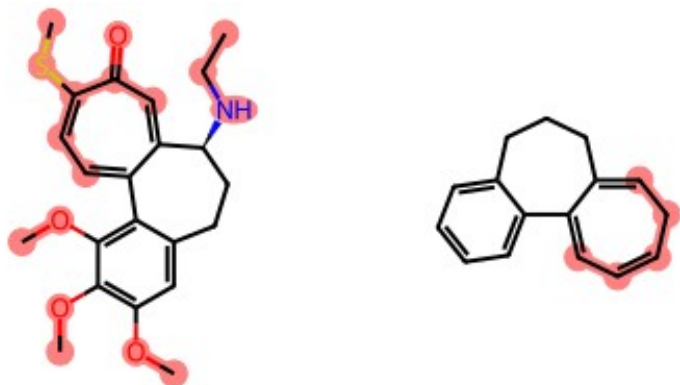



```

l_mn = list(range(len(file['SMILES'])))
mol1 = Chem.MolFromSmiles('C1Cc2ccccc2C2=CC=CCC=C2C1')
for i in range(len(file['SMILES'])):
    mol = Chem.MolFromSmiles(file['SMILES'][i])
    l_mn[i] = view_difference(mol1, mol)
l_mn[0]

```

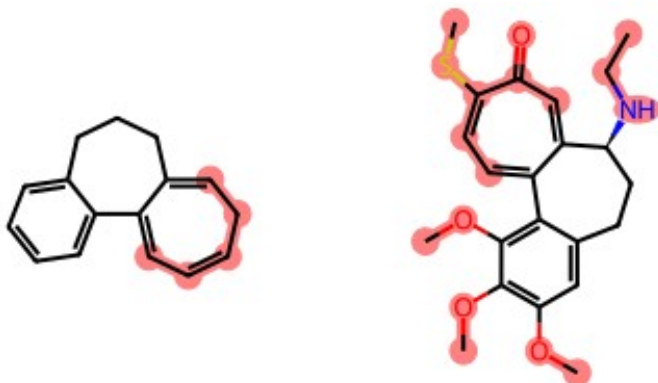

```
l_mn[1]
```

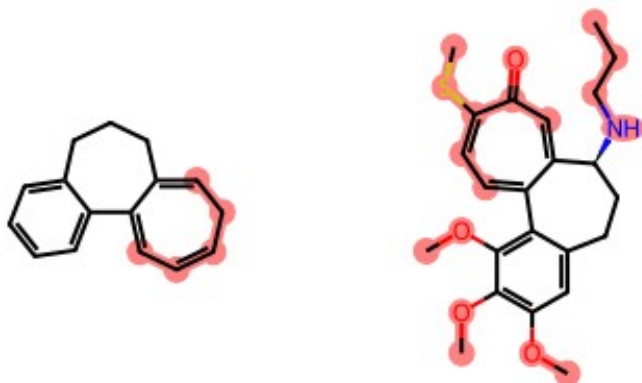

```
l_mn[7]
```

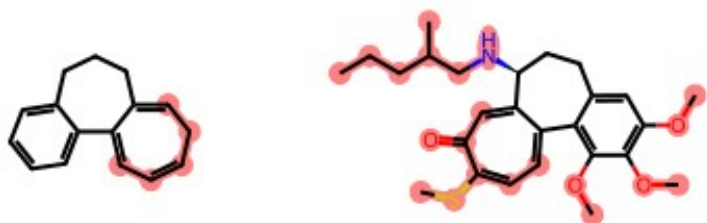

```
m = Chem.MolFromSmiles(file['SMILES'][0])
substructure =
Chem.MolFromSmarts('CC(=O)NC1CCC2=CC(=C(C(=C2C3=CC=C(C(=O)C=C13)OC)OC)
OC)OC')
print(m.GetSubstructMatch(substructure)) #GetSubstructMatch
#GetSubstructMatches
```

()

m

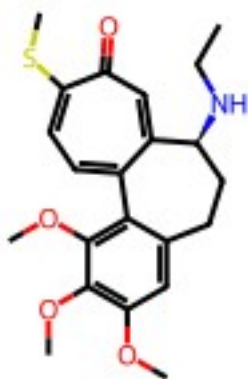

```
file['SMILES'][0]
```

```
'C0c2c3C1=CC=C(SC)C(=O)C=C1[C@H](CCc3cc(OC)c2OC)NCC'
```

```
Chem.MolFromSmiles('CC(=O)NC1CCC2=CC(=C(C(=C2C3=CC=C(C(=O)C=C13)OC)OC)
OC)OC')
```

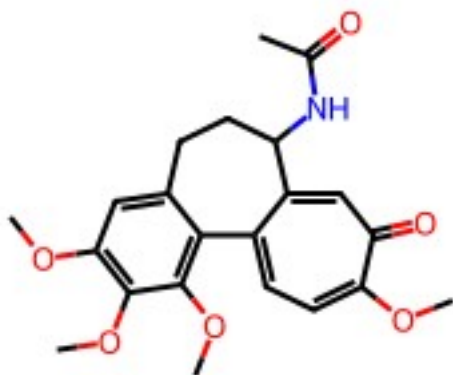

```
# draw structure and get SMILES -> only of the core
interesting_smiles = 'C1Cc2ccccc2C2=CC=CCC=C2C1'
# 'C1CC2=CCC=CC=C2C3=CC=CC=C3C1' # OLD 'C1CC2=C(C=CC=C2)C2=CC=CCC=C2C1'
# C1CC2=CCC=CC=C2C3=CC=CC=C3C1
```

```
Chem.MolFromSmiles(interesting_smiles)
```

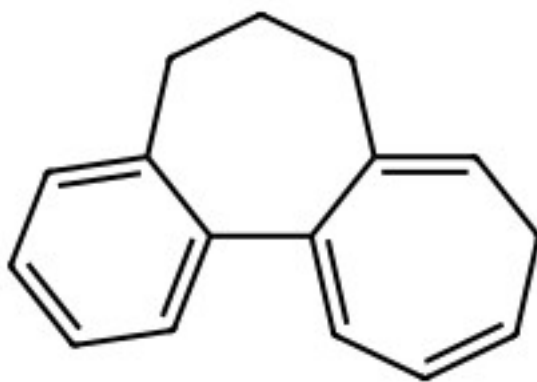

```
m = Chem.MolFromSmiles(file['SMILES'][0])
substructure = Chem.MolFromSmarts(interesting_smiles)
print(m.GetSubstructMatch(substructure))
```

```
()
```

```
m
```

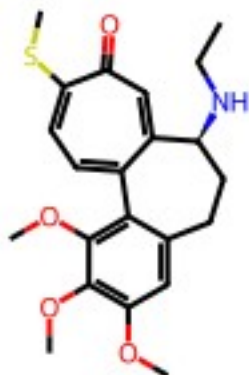

```
ne_att = 'CC\C(C)=C/C(=C)C=C'
```

```
Chem.MolFromSmiles(ne_att)
```

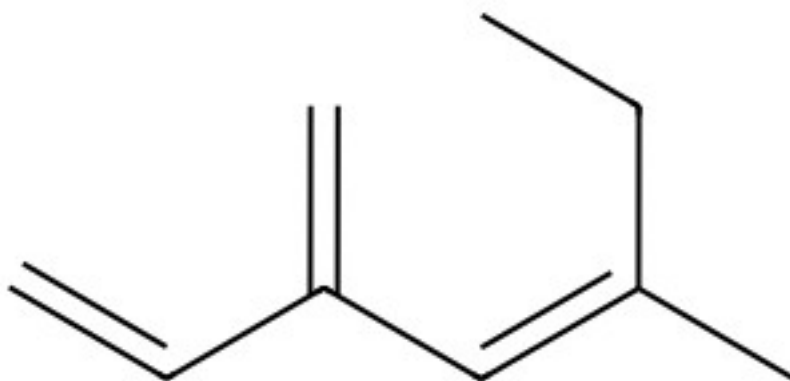

```
bnm = Chem.MolToSmiles(Chem.MolFromSmiles(file['SMILES'][0]),
canonical=True, isomericSmiles=False)
m = Chem.MolFromSmiles(bnm)
substructure = Chem.MolFromSmarts('c1cccc1')
substructure2 = Chem.MolFromSmarts('CCC')
print(m.GetSubstructMatches(substructure))
#print(m)
#print(m.GetSubstructMatches(substructure2))

((6, 7, 8, 11, 14, 17),)

m
```

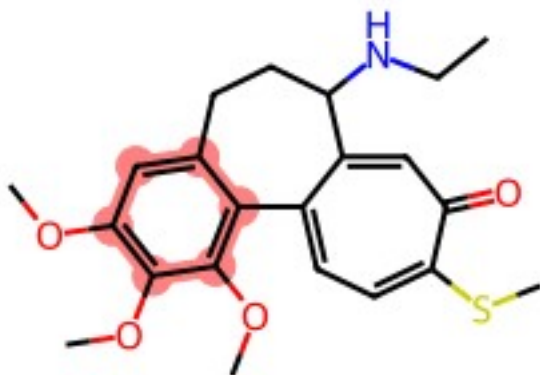

bnm

```
'CCNC1CCc2cc(OC)c(OC)c(OC)c2-c2ccc(SC)c(=O)cc21'
```

```
bnmo = 'C1Cc2ccccc2C2=CC=CCC=C2C1'
```

```
bnmo = Chem.MolToSmiles(Chem.MolFromSmiles(bnmo), canonical=True,  
isomericSmiles=False)
```

```
m = Chem.MolFromSmiles(bnm)
```

```
substructure = Chem.MolFromSmarts(bnmo)
```

```
print(m.GetSubstructMatch(substructure))
```

```
()
```

```
m
```

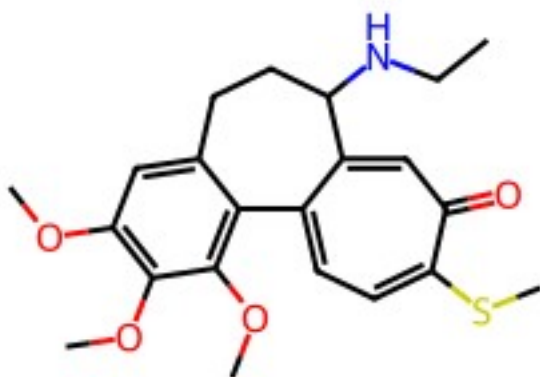

```
all_mols = [Chem.MolFromSmiles(smi) for smi in file['SMILES']]
```

```
my_svg = Draw.MolsToGridImage(all_mols, legends=[str("Molecule number:"  
+str(x+1)) for x in range(len(all_mols))],
```

```
maxMols=int(len(all_mols)),  
molsPerRow=5, useSVG = True, subImgSize=(300,300))
```

```
my_svg
```



```
#with open('initial_colchicine.svg','wb+') as outfile:
# outfile.write(my_svg.data.encode('utf-8'))

## create the charset and other stuff.... check this and try to train
the model...
```

## Tanimoto similarity between...

```
from rdkit.DataStructs.cDataStructs import TanimotoSimilarity
import matplotlib.pyplot as plt

def prepare_fingerprints(smi_1, smi_list2):
    mol_l1 = Chem.MolFromSmiles(smi_1)
    mol_l2 = [Chem.MolFromSmiles(smi) for smi in smi_list2]

    fingerprint_list1 = Chem.RDKFingerprint(mol_l1)

    fingerprint_list2 = [Chem.RDKFingerprint(mol) for mol in mol_l2]

    return fingerprint_list1, fingerprint_list2

def calculate_similarity(finger, finger_list):
    similarity = []
    for sim in finger_list:
        similarity.append(TanimotoSimilarity(sim, finger))

    return similarity

nea = prepare_fingerprints(interesting_smiles, file['SMILES'])
simi = calculate_similarity(nea[0], nea[1])

final_df = pd.DataFrame(columns=['test'])
final_df['Similarity'] = 0
final_df['Similarity'] = simi

fig = plt.figure(figsize=(20,20))
ax = fig.add_subplot(111)

plt.hist(final_df['Similarity'], bins=10)
plt.title('Tanimoto similarity ...', fontweight='bold', fontsize=28)
plt.xlabel('Tanimoto similarity', fontweight='bold', fontsize=24)
plt.ylabel('Counts', fontweight='bold', fontsize=24)
plt.rc('grid', linestyle="-. ", color='black')
plt.grid(True)
plt.show()
```

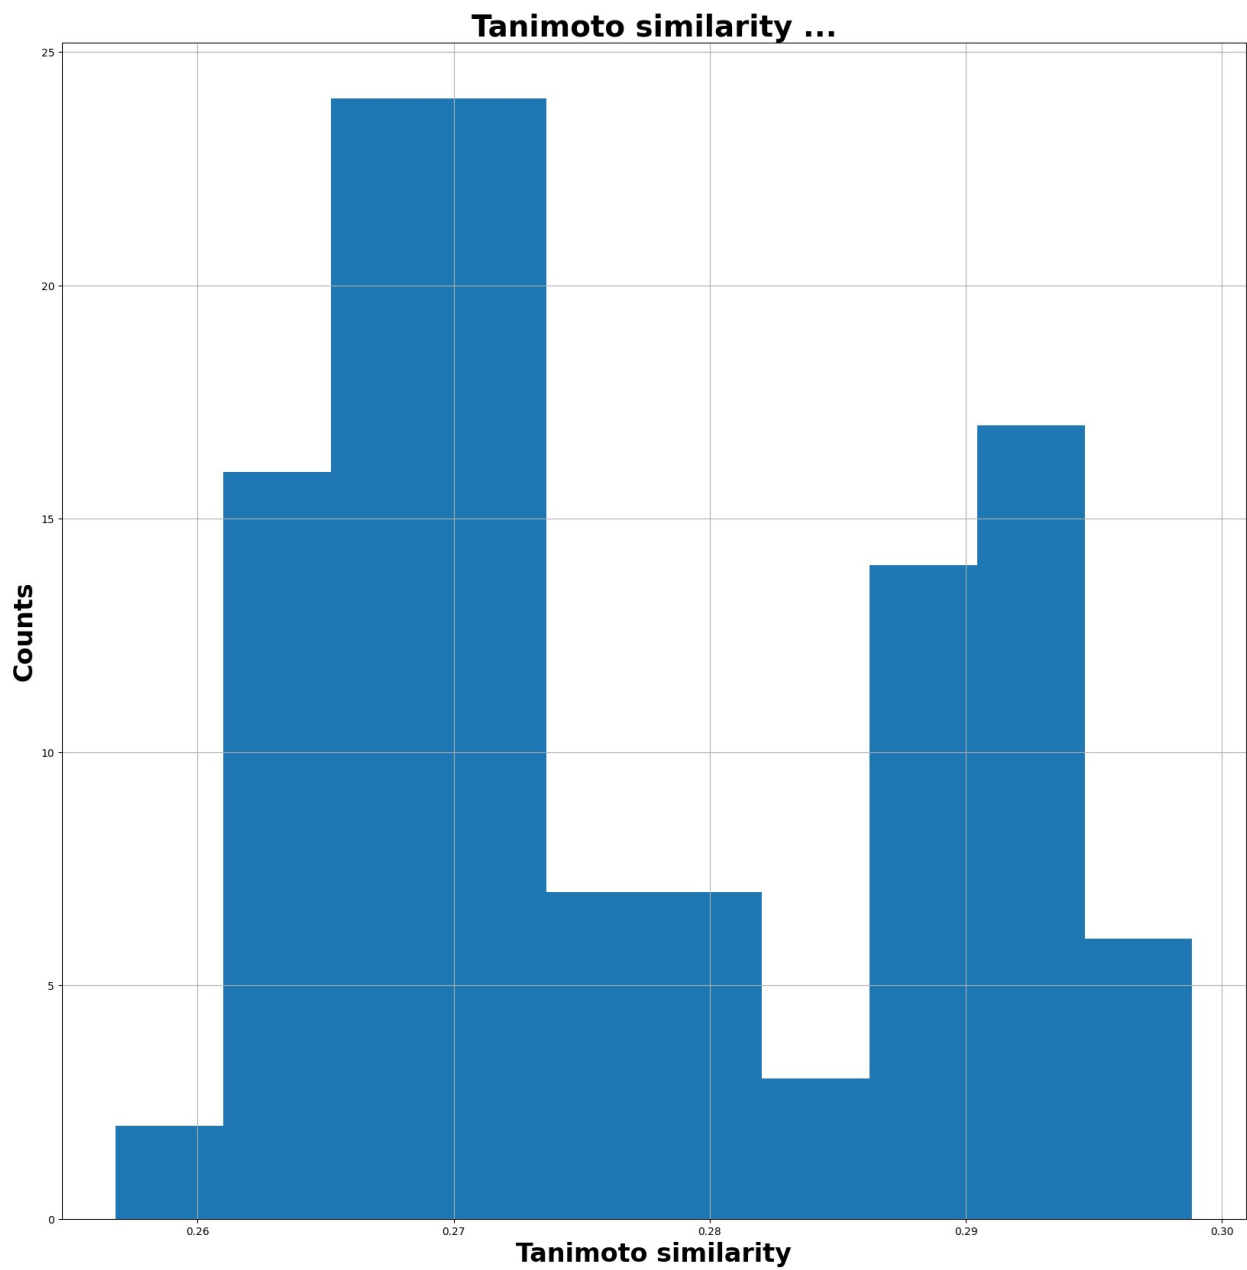

```
min(final_df['Similarity'])
```

```
0.2568064753495217
```



# Notebook

December 19, 2023

## 1 File 38

```
[1]: import pandas as pd
      from rdkit import Chem
      from rdkit.Chem import Draw
      from rdkit.DataStructs.cDataStructs import TanimotoSimilarity
      import matplotlib.pyplot as plt

      import warnings
      warnings.filterwarnings(action='ignore')
```

```
[2]: dat_1 = pd.read_excel(r'../Data/AI_generated_Molecules_0_1_.xlsx')
      dat_2 = pd.read_excel(r'../Data/AI_generated_Molecules_0_2_.xlsx')
```

```
[3]: dat_1.head()
```

|   | Unnamed: 0 | AI_generated_SMILES                                            |
|---|------------|----------------------------------------------------------------|
| 0 | 0          | <chem>COC1=C2C3=CC=C(NC)C(=O)C=C3[C@H1](CCC2=CC(OC)=...</chem> |
| 1 | 1          | <chem>COC1=C2C3=CC=C(NC)C(=O)C=C3[C@H1](CCC2=CC(OC)=...</chem> |
| 2 | 2          | <chem>COC1=C2C3=CC=C(NC)C(=O)C=C3[C@H1](CCC2=CC(OC)=...</chem> |
| 3 | 3          | <chem>COC1=C2C3=CC=C(NC)C(=O)C=C3[C@H1](CCC2=CC(OC)=...</chem> |
| 4 | 4          | <chem>COC1=C2C3=CC=C(NC)C(=O)C=C3[C@H1](CCC2=CC(OC)=...</chem> |

```
[4]: dat_2.head()
```

|   | Unnamed: 0 | AI_generated_SMILES                                            |
|---|------------|----------------------------------------------------------------|
| 0 | 0          | <chem>COC1=C2C3=CC=C(NC)C(=O)C=C3[C@H1](CCC2=CC(OC)=...</chem> |
| 1 | 1          | <chem>COC1=C2C3=CC=C(NC)C(=O)C=C3[C@H1](CCC2=CC(OC)=...</chem> |
| 2 | 2          | <chem>CSCC(=O)C=C1C(C2=C(OC)C(OC)=C(C=C2CC[C@H1]1NC...</chem>  |
| 3 | 3          | <chem>CNCCC=C1C(C2=C(OC)C(=C(C=C2CC[C@H1]1NCN)C)OO)COC</chem>  |
| 4 | 4          | <chem>COC1=CC2=C(C3=C(OC)C(OC)=CC=C3CC[C@H1]2NOC)CC...</chem>  |

```
[5]: all_frames = [dat_1, dat_2]
      all_dat = pd.concat(all_frames)
```

```
[6]: all_dat.shape
```

```
[6]: (2175, 2)
```

```
[7]: all_dat = all_dat.drop_duplicates(subset=['AI_generated_SMILES'])
all_dat.shape
```

```
[7]: (1786, 2)
```

```
[8]: all_dat.head()
```

```
[8]: Unnamed: 0      AI_generated_SMILES
0      0  COC1=C2C3=CC=C(NC)C(=O)C=C3[C@H1](CCC2=CC(OC)=...
1      1  COC1=C2C3=CC=C(NC)C(=O)C=C3[C@H1](CCC2=CC(OC)=...
2      2  COC1=C2C3=CC=C(NC)C(=O)C=C3[C@H1](CCC2=CC(OC)=...
3      3  COC1=C2C3=CC=C(NC)C(=O)C=C3[C@H1](CCC2=CC(OC)=...
4      4  COC1=C2C3=CC=C(NC)C(=O)C=C3[C@H1](CCC2=CC(OC)=...
```

```
[9]: ## Similar structures
Colchicine_core = 'C1Cc2ccccc2C2=CC=CCC=C2C1'
```

```
[10]: def prepare_fingerprints(smi_1, smi_list2):
    mol_l1 = Chem.MolFromSmiles(smi_1)
    mol_l2 = [Chem.MolFromSmiles(smi) for smi in smi_list2]

    fingerprint_list1 = Chem.RDKFingerprint(mol_l1)

    fingerprint_list2 = [Chem.RDKFingerprint(mol) for mol in mol_l2]

    return fingerprint_list1, fingerprint_list2
```

```
[11]: def calculate_similarity(finger, finger_list):

    similarity = []
    for sim in finger_list:
        similarity.append(TanimotoSimilarity(sim, finger))

    return similarity
```

```
[12]: nea = prepare_fingerprints(Colchicine_core, all_dat['AI_generated_SMILES'])
```

```
[13]: simi = calculate_similarity(nea[0], nea[1])
```

```
[14]: final_df = pd.DataFrame(columns=['test'])
final_df['Similarity'] = 0
final_df['Similarity'] = simi
all_dat['Similarity to colchicine core'] = simi
```

```
[15]: fig = plt.figure(figsize=(20,20))
ax = fig.add_subplot(111)

plt.hist(final_df['Similarity'], bins=10)
```

```
plt.title('Tanimoto similarity of newly generated structures to colchicine_↵
↵core', fontweight='bold', fontsize=28)
plt.xlabel('Tanimoto similarity', fontweight='bold', fontsize=24)
plt.ylabel('Counts', fontweight='bold', fontsize=24)
plt.rc('grid', linestyle="-. ", color='black')
plt.axvline(x = 0.2568064753495217, color = 'r', label = 'left-side cut off')
plt.grid(True)
plt.show()
```

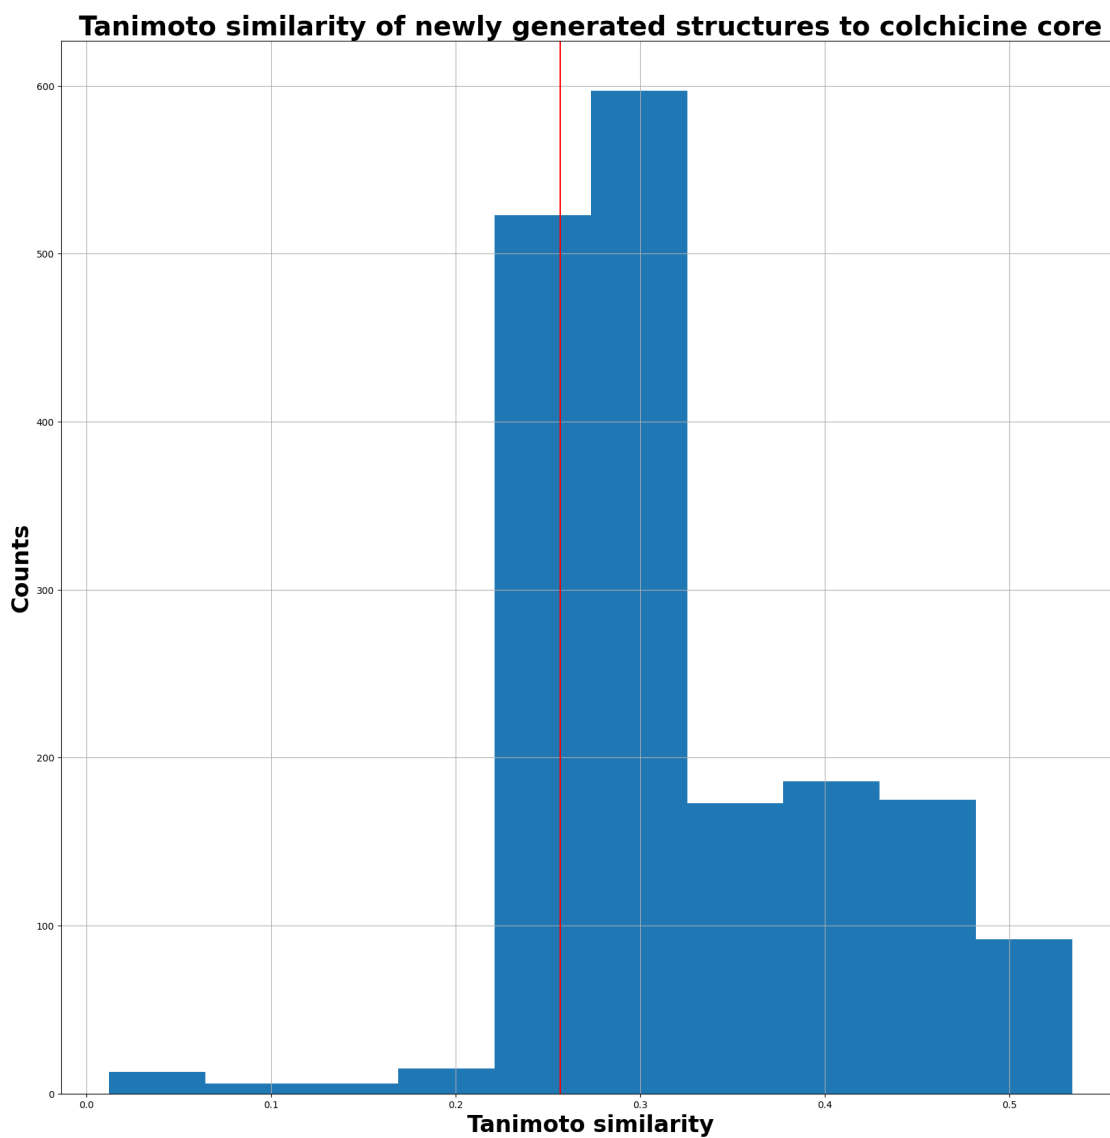

```
[16]: final_df['Similarity'].min()
```

```
[16]: 0.01228878648233487
```

```

[ ]:
[17]: Colchicine = 'CC(=O)NC1CCC2=CC(=C(C(=C2C3=CC=C(C(=O)C=C13)OC)OC)OC)OC'
[18]: nea = prepare_fingerprints(Colchicine, all_dat['AI_generated_SMILES'])
[19]: simi = calculate_similarity(nea[0], nea[1])
[20]: final_df = pd.DataFrame(columns=['test'])
      final_df['Similarity'] = 0
      final_df['Similarity'] = simi
      all_dat['Similarity to colchicine'] = simi
[21]: fig = plt.figure(figsize=(20,20))
      ax = fig.add_subplot(111)

      plt.hist(final_df['Similarity'], bins=10)
      plt.title('Tanimoto similarity of newly generated structures to colchicine',
        ↪fontweight='bold', fontsize=28)
      plt.xlabel('Tanimoto similarity', fontweight='bold', fontsize=24)
      plt.ylabel('Counts', fontweight='bold', fontsize=24)
      plt.rc('grid', linestyle="-. ", color='black')
      plt.axvline(x = 0.2568064753495217, color = 'r', label = 'left-side cut off')
      plt.grid(True)
      plt.show()

```

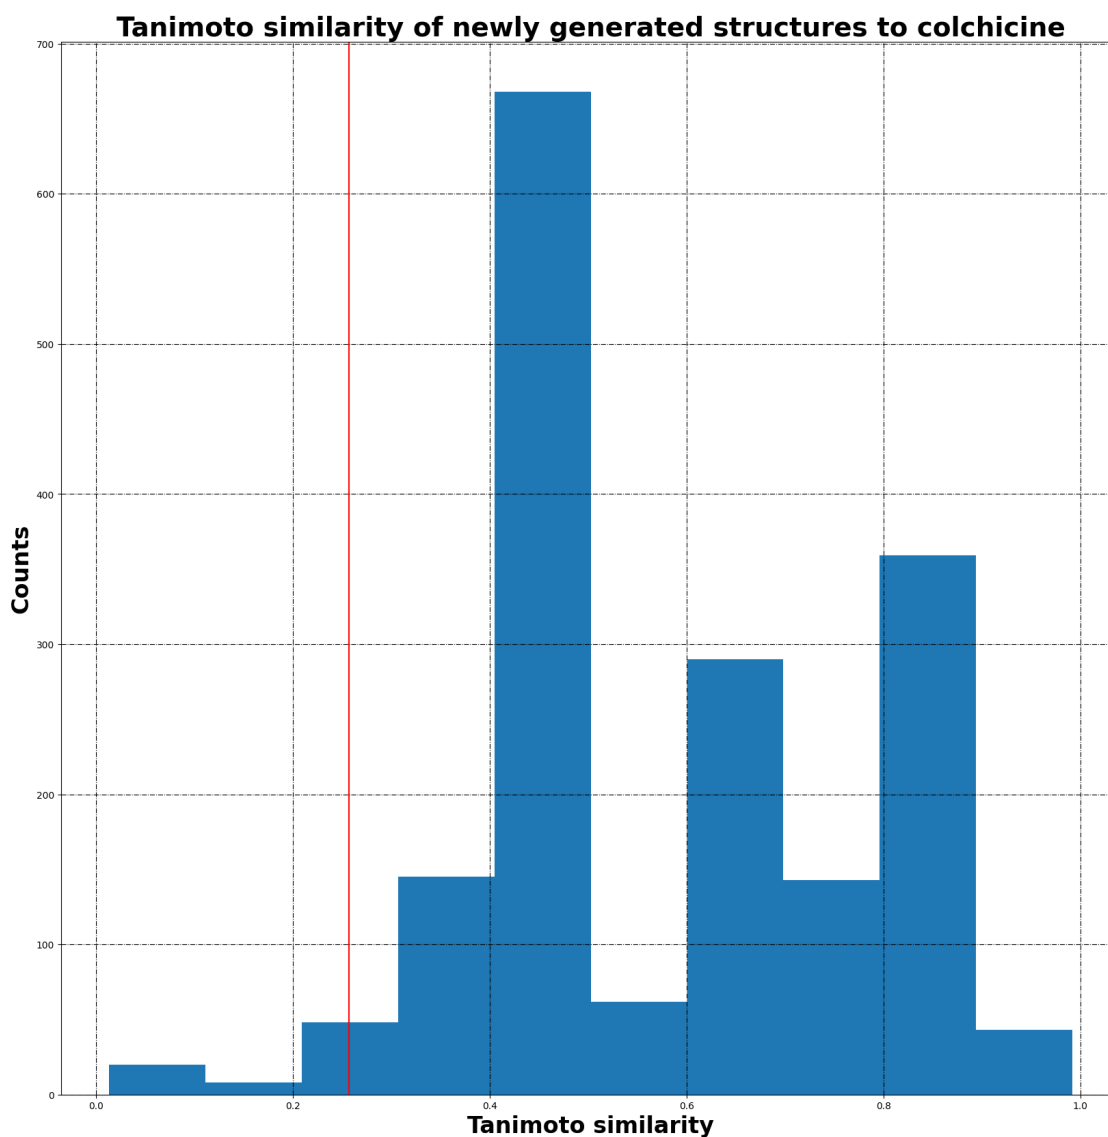

```
[22]: final_df['Similarity'].min()
```

```
[22]: 0.013404825737265416
```

```
[23]: all_dat.head()
```

```
[23]: Unnamed: 0      AI_generated_SMILES \
0      0  COC1=C2C3=CC=C(NC)C(=O)C=C3[C@H1](CCC2=CC(OC)=...
1      1  COC1=C2C3=CC=C(NC)C(=O)C=C3[C@H1](CCC2=CC(OC)=...
2      2  COC1=C2C3=CC=C(NC)C(=O)C=C3[C@H1](CCC2=CC(OC)=...
3      3  COC1=C2C3=CC=C(NC)C(=O)C=C3[C@H1](CCC2=CC(OC)=...
4      4  COC1=C2C3=CC=C(NC)C(=O)C=C3[C@H1](CCC2=CC(OC)=...
```

|   | Similarity to colchicine core | Similarity to colchicine |
|---|-------------------------------|--------------------------|
| 0 | 0.266997                      | 0.871074                 |
| 1 | 0.268667                      | 0.844730                 |
| 2 | 0.268310                      | 0.862520                 |
| 3 | 0.266807                      | 0.862969                 |
| 4 | 0.270042                      | 0.860522                 |

```
[24]: to_colchicyne_core = all_dat[all_dat['Similarity to colchicine core'] > 0.
      ↪2568064753495217]
      to_colchicyne_core.shape
```

```
[24]: (1678, 4)
```

```
[25]: to_colchicyne = all_dat[all_dat['Similarity to colchicine'] > 0.
      ↪2568064753495217]
      to_colchicyne.shape
```

```
[25]: (1740, 4)
```

```
[ ]: ## Delete structures that are recreated => 100% similar (the same as initial)
```

```
[26]: initial_data = pd.read_excel(r'../Data/Kolchicyna_prepared_data.xlsx')
```

```
[27]: new_df = pd.DataFrame(data=to_colchicyne_core, columns=['AI_generated_SMILES'])
      for element in initial_data['SMILES']:
          new_df[element] = 0
```

```
[28]: new_df = new_df.reset_index()
      new_df = new_df.drop(columns=['index'])
      new_df.head()
```

```
[28]:
```

|   | AI_generated_SMILES \                                              |
|---|--------------------------------------------------------------------|
| 0 | <chem>COC1=C2C3=CC=C(NC)C(=O)C=C3[C@H1](CCC2=CC(OC)=...</chem>     |
| 1 | <chem>COC1=C2C3=CC=C(NC)C(=O)C=C3[C@H1](CCC2=CC(OC)=...</chem>     |
| 2 | <chem>COC1=C2C3=CC=C(NC)C(=O)C=C3[C@H1](CCC2=CC(OC)=...</chem>     |
| 3 | <chem>COC1=C2C3=CC=C(NC)C(=O)C=C3[C@H1](CCC2=CC(OC)=...</chem>     |
| 4 | <chem>COC1=C2C3=CC=C(NC)C(=O)C=C3[C@H1](CCC2=CC(OC)=...</chem>     |
|   | <chem>COc2c3C1=CC=C(SC)C(=O)C=C1[C@H](CCc3cc(OC)c2OC)NCC \</chem>  |
| 0 | 0                                                                  |
| 1 | 0                                                                  |
| 2 | 0                                                                  |
| 3 | 0                                                                  |
| 4 | 0                                                                  |
|   | <chem>COc2c3C1=CC=C(SC)C(=O)C=C1[C@H](CCc3cc(OC)c2OC)NCCC \</chem> |
| 0 | 0                                                                  |

|   |   |
|---|---|
| 1 | 0 |
| 2 | 0 |
| 3 | 0 |
| 4 | 0 |

|   |                                                                     |
|---|---------------------------------------------------------------------|
|   | <chem>COC2C3C1=CC=C(SC)C(=O)C=C1[C@H](CCc3cc(OC)c2OC)NCCCC \</chem> |
| 0 | 0                                                                   |
| 1 | 0                                                                   |
| 2 | 0                                                                   |
| 3 | 0                                                                   |
| 4 | 0                                                                   |

|   |                                                                         |
|---|-------------------------------------------------------------------------|
|   | <chem>CC(C)CN[C@H]2CCc3cc(OC)c(OC)c(OC)c3C1=CC=C(SC)C(=O)C=C12 \</chem> |
| 0 | 0                                                                       |
| 1 | 0                                                                       |
| 2 | 0                                                                       |
| 3 | 0                                                                       |
| 4 | 0                                                                       |

|   |                                                                      |
|---|----------------------------------------------------------------------|
|   | <chem>COC2C3C1=CC=C(SC)C(=O)C=C1[C@H](CCc3cc(OC)c2OC)NCCCCC \</chem> |
| 0 | 0                                                                    |
| 1 | 0                                                                    |
| 2 | 0                                                                    |
| 3 | 0                                                                    |
| 4 | 0                                                                    |

|   |                                                                          |
|---|--------------------------------------------------------------------------|
|   | <chem>CC(C)CCN[C@H]2CCc3cc(OC)c(OC)c(OC)c3C1=CC=C(SC)C(=O)C=C12 \</chem> |
| 0 | 0                                                                        |
| 1 | 0                                                                        |
| 2 | 0                                                                        |
| 3 | 0                                                                        |
| 4 | 0                                                                        |

|   |                                                                      |
|---|----------------------------------------------------------------------|
|   | <chem>COC2C3C1=CC=C(SC)C(=O)C=C1[C@H](CCc3cc(OC)c2OC)NCCCCC \</chem> |
| 0 | 0                                                                    |
| 1 | 0                                                                    |
| 2 | 0                                                                    |
| 3 | 0                                                                    |
| 4 | 0                                                                    |

|   |                                                                           |
|---|---------------------------------------------------------------------------|
|   | <chem>CC(CCC)CN[C@H]2CCc3cc(OC)c(OC)c(OC)c3C1=CC=C(SC)C(=O)C=C12 \</chem> |
| 0 | 0                                                                         |
| 1 | 0                                                                         |
| 2 | 0                                                                         |
| 3 | 0                                                                         |
| 4 | 0                                                                         |

|   |                                                                      |     |   |
|---|----------------------------------------------------------------------|-----|---|
|   | <chem>COc2c3C1=CC=C(SC)C(=O)C=C1[C@H](CCc3cc(OC)c2OC)NCCCCCCC</chem> | ... | \ |
| 0 | 0                                                                    | ... |   |
| 1 | 0                                                                    | ... |   |
| 2 | 0                                                                    | ... |   |
| 3 | 0                                                                    | ... |   |
| 4 | 0                                                                    | ... |   |

|   |                                                                             |   |
|---|-----------------------------------------------------------------------------|---|
|   | <chem>CCN(CC)C(=S)N[C@H]2CCc3cc(OC)c(OC)c(OC)c3C1=CC=C(NC)C(=O)C=C12</chem> | \ |
| 0 | 0                                                                           |   |
| 1 | 0                                                                           |   |
| 2 | 0                                                                           |   |
| 3 | 0                                                                           |   |
| 4 | 0                                                                           |   |

|   |                                                                                 |   |
|---|---------------------------------------------------------------------------------|---|
|   | <chem>C=CCN(CC=C)C(=S)N[C@H]2CCc3cc(OC)c(OC)c(OC)c3C1=CC=C(NC)C(=O)C=C12</chem> | \ |
| 0 | 0                                                                               |   |
| 1 | 0                                                                               |   |
| 2 | 0                                                                               |   |
| 3 | 0                                                                               |   |
| 4 | 0                                                                               |   |

|   |                                                                               |   |
|---|-------------------------------------------------------------------------------|---|
|   | <chem>OCCN(CCO)C(=S)N[C@H]2CCc3cc(OC)c(OC)c(OC)c3C1=CC=C(NC)C(=O)C=C12</chem> | \ |
| 0 | 0                                                                             |   |
| 1 | 0                                                                             |   |
| 2 | 0                                                                             |   |
| 3 | 0                                                                             |   |
| 4 | 0                                                                             |   |

|   |                                                                             |   |
|---|-----------------------------------------------------------------------------|---|
|   | <chem>S=C(N[C@H]1CCc3cc(OC)c(OC)c(OC)c3C2=CC=C(NC)C(=O)C=C12)N4CCCC4</chem> | \ |
| 0 | 0                                                                           |   |
| 1 | 0                                                                           |   |
| 2 | 0                                                                           |   |
| 3 | 0                                                                           |   |
| 4 | 0                                                                           |   |

|   |                                                                                   |   |
|---|-----------------------------------------------------------------------------------|---|
|   | <chem>Clc1ccc(cc1)NC(=S)N[C@H]3CCc4cc(OC)c(OC)c(OC)c4C2=CC=C(NC)C(=O)C=C23</chem> | \ |
| 0 | 0                                                                                 |   |
| 1 | 0                                                                                 |   |
| 2 | 0                                                                                 |   |
| 3 | 0                                                                                 |   |
| 4 | 0                                                                                 |   |

|   |                                                                                         |   |
|---|-----------------------------------------------------------------------------------------|---|
|   | <chem>FC(F)(F)c1ccc(cc1)NC(=S)N[C@H]3CCc4cc(OC)c(OC)c(OC)c4C2=CC=C(NC)C(=O)C=C23</chem> | \ |
| 0 | 0                                                                                       |   |
| 1 | 0                                                                                       |   |
| 2 | 0                                                                                       |   |
| 3 | 0                                                                                       |   |



|                                                                                                                          |   |
|--------------------------------------------------------------------------------------------------------------------------|---|
| 4                                                                                                                        | 0 |
| <chem>O[C@@H](CNC(=S)N[C@H]2CCc3cc(OC)c(OC)c(OC)c3C1=CC=C(NC)C(=O)C=C12)[C@H]4OC(C)(C)O[C@@H]4[C@H]5COC(C)(C)O5 \</chem> |   |
| 0                                                                                                                        | 0 |
| 1                                                                                                                        | 0 |
| 2                                                                                                                        | 0 |
| 3                                                                                                                        | 0 |
| 4                                                                                                                        | 0 |
| <chem>OC[C@@H](O)[C@@H](O)[C@H](O)[C@@H](O)CNC(=S)N[C@H]2CCc3cc(OC)c(OC)c(OC)c3C1=CC=C(NC)C(=O)C=C12 \</chem>            |   |
| 0                                                                                                                        | 0 |
| 1                                                                                                                        | 0 |
| 2                                                                                                                        | 0 |
| 3                                                                                                                        | 0 |
| 4                                                                                                                        | 0 |
| <chem>CC(C)(C)OC(=O)\N=C(/NC(=O)OC(C)(C)C)N[C@H]2CCc3cc(OC)c(OC)c(OC)c3C1=CC=C(NC)C(=O)C=C12 \</chem>                    |   |
| 0                                                                                                                        | 0 |
| 1                                                                                                                        | 0 |
| 2                                                                                                                        | 0 |
| 3                                                                                                                        | 0 |
| 4                                                                                                                        | 0 |
| <chem>N=C(N)N[C@H]2CCc3cc(OC)c(OC)c(OC)c3C1=CC=C(NC)C(=O)C=C12</chem>                                                    |   |
| 0                                                                                                                        | 0 |
| 1                                                                                                                        | 0 |
| 2                                                                                                                        | 0 |
| 3                                                                                                                        | 0 |
| 4                                                                                                                        | 0 |
| [5 rows x 119 columns]                                                                                                   |   |

```
[29]: new_df.tail(n=5)
```

|                                                                   |                                                                |
|-------------------------------------------------------------------|----------------------------------------------------------------|
| [29]:                                                             | AI_generated_SMILES \                                          |
| 1673                                                              | <chem>N([C@H1]1CCC2=CC(OC)=C(OC)C(OC)=C2C3=CC=C(NC)C...</chem> |
| 1674                                                              | <chem>O=C(CNC=C1C(C2=C(OC)C(OC)=C(OC)C=C2CC[C@@H1]1N...</chem> |
| 1675                                                              | <chem>CNC(CNC(=O)OCCN[C@H1]1)CCC2=CC(OC)=C(OC)C(OC)=...</chem> |
| 1676                                                              | <chem>O=C(N[C@H1]1CCC2=CC(OC)=C(OC)C(OC)=C2C3=CC=C(N...</chem> |
| 1677                                                              | <chem>C12=C3C(C4=C(OC)C(OC)=C(OC)C=C4CC[C@@H1]3NC(=O...</chem> |
| <chem>COc2c3C1=CC=C(SC)C(=O)C=C1[C@H](CCc3cc(OC)c2OC)NCC \</chem> |                                                                |
| 1673                                                              | 0                                                              |
| 1674                                                              | 0                                                              |

|      |   |
|------|---|
| 1675 | 0 |
| 1676 | 0 |
| 1677 | 0 |

|      |                                                                    |
|------|--------------------------------------------------------------------|
|      | <chem>COc2c3C1=CC=C(SC)C(=O)C=C1[C@H](CCc3cc(OC)c2OC)NCCC \</chem> |
| 1673 | 0                                                                  |
| 1674 | 0                                                                  |
| 1675 | 0                                                                  |
| 1676 | 0                                                                  |
| 1677 | 0                                                                  |

|      |                                                                     |
|------|---------------------------------------------------------------------|
|      | <chem>COc2c3C1=CC=C(SC)C(=O)C=C1[C@H](CCc3cc(OC)c2OC)NCCCC \</chem> |
| 1673 | 0                                                                   |
| 1674 | 0                                                                   |
| 1675 | 0                                                                   |
| 1676 | 0                                                                   |
| 1677 | 0                                                                   |

|      |                                                                         |
|------|-------------------------------------------------------------------------|
|      | <chem>CC(C)CN[C@H]2CCc3cc(OC)c(OC)c(OC)c3C1=CC=C(SC)C(=O)C=C12 \</chem> |
| 1673 | 0                                                                       |
| 1674 | 0                                                                       |
| 1675 | 0                                                                       |
| 1676 | 0                                                                       |
| 1677 | 0                                                                       |

|      |                                                                      |
|------|----------------------------------------------------------------------|
|      | <chem>COc2c3C1=CC=C(SC)C(=O)C=C1[C@H](CCc3cc(OC)c2OC)NCCCCC \</chem> |
| 1673 | 0                                                                    |
| 1674 | 0                                                                    |
| 1675 | 0                                                                    |
| 1676 | 0                                                                    |
| 1677 | 0                                                                    |

|      |                                                                          |
|------|--------------------------------------------------------------------------|
|      | <chem>CC(C)CCN[C@H]2CCc3cc(OC)c(OC)c(OC)c3C1=CC=C(SC)C(=O)C=C12 \</chem> |
| 1673 | 0                                                                        |
| 1674 | 0                                                                        |
| 1675 | 0                                                                        |
| 1676 | 0                                                                        |
| 1677 | 0                                                                        |

|      |                                                                      |
|------|----------------------------------------------------------------------|
|      | <chem>COc2c3C1=CC=C(SC)C(=O)C=C1[C@H](CCc3cc(OC)c2OC)NCCCCC \</chem> |
| 1673 | 0                                                                    |
| 1674 | 0                                                                    |
| 1675 | 0                                                                    |
| 1676 | 0                                                                    |
| 1677 | 0                                                                    |

|  |                                                                           |
|--|---------------------------------------------------------------------------|
|  | <chem>CC(CCC)CN[C@H]2CCc3cc(OC)c(OC)c(OC)c3C1=CC=C(SC)C(=O)C=C12 \</chem> |
|--|---------------------------------------------------------------------------|

|      |   |                                                                                     |
|------|---|-------------------------------------------------------------------------------------|
| 1673 | 0 |                                                                                     |
| 1674 | 0 |                                                                                     |
| 1675 | 0 |                                                                                     |
| 1676 | 0 |                                                                                     |
| 1677 | 0 |                                                                                     |
| <br> |   |                                                                                     |
|      |   | <chem>COc2c3C1=CC=C(SC)C(=O)C=C1[C@H](CCc3cc(OC)c2OC)NCCCCCCC ... \</chem>          |
| 1673 | 0 | ...                                                                                 |
| 1674 | 0 | ...                                                                                 |
| 1675 | 0 | ...                                                                                 |
| 1676 | 0 | ...                                                                                 |
| 1677 | 0 | ...                                                                                 |
| <br> |   |                                                                                     |
|      |   | <chem>CCN(CC)C(=S)N[C@H]2CCc3cc(OC)c(OC)c(OC)c3C1=CC=C(NC)C(=O)C=C12 \</chem>       |
| 1673 | 0 |                                                                                     |
| 1674 | 0 |                                                                                     |
| 1675 | 0 |                                                                                     |
| 1676 | 0 |                                                                                     |
| 1677 | 0 |                                                                                     |
| <br> |   |                                                                                     |
|      |   | <chem>C=CCN(CC=C)C(=S)N[C@H]2CCc3cc(OC)c(OC)c(OC)c3C1=CC=C(NC)C(=O)C=C12 \</chem>   |
| 1673 | 0 |                                                                                     |
| 1674 | 0 |                                                                                     |
| 1675 | 0 |                                                                                     |
| 1676 | 0 |                                                                                     |
| 1677 | 0 |                                                                                     |
| <br> |   |                                                                                     |
|      |   | <chem>OCCN(CCO)C(=S)N[C@H]2CCc3cc(OC)c(OC)c(OC)c3C1=CC=C(NC)C(=O)C=C12 \</chem>     |
| 1673 | 0 |                                                                                     |
| 1674 | 0 |                                                                                     |
| 1675 | 0 |                                                                                     |
| 1676 | 0 |                                                                                     |
| 1677 | 0 |                                                                                     |
| <br> |   |                                                                                     |
|      |   | <chem>S=C(N[C@H]1CCc3cc(OC)c(OC)c(OC)c3C2=CC=C(NC)C(=O)C=C12)N4CCCC4 \</chem>       |
| 1673 | 0 |                                                                                     |
| 1674 | 0 |                                                                                     |
| 1675 | 0 |                                                                                     |
| 1676 | 0 |                                                                                     |
| 1677 | 0 |                                                                                     |
| <br> |   |                                                                                     |
|      |   | <chem>Clc1ccc(cc1)NC(=S)N[C@H]3CCc4cc(OC)c(OC)c(OC)c4C2=CC=C(NC)C(=O)C=C23 \</chem> |
| 1673 | 0 |                                                                                     |
| 1674 | 0 |                                                                                     |
| 1675 | 0 |                                                                                     |
| 1676 | 0 |                                                                                     |
| 1677 | 0 |                                                                                     |

```

FC(F)(F)c1ccc(cc1)NC(=S)N[C@H]3CCc4cc(OC)c(OC)c(OC)c4C2=CC=C(NC)C(=O)C=C23
\
1673 0
1674 0
1675 0
1676 0
1677 0

O[C@@H](CNC(=S)N[C@H]2CCc3cc(OC)c(OC)c(OC)c3C1=CC=C(NC)C(=O)C=C12)[C@H]4OC
(C)(C)O[C@@H]4[C@H]5COC(C)(C)O5 \
1673 0
1674 0
1675 0
1676 0
1677 0

OC[C@@H](O)[C@@H](O)[C@H](O)[C@@H](O)CNC(=S)N[C@H]2CCc3cc(OC)c(OC)c(OC)c3C
1=CC=C(NC)C(=O)C=C12 \
1673 0
1674 0
1675 0
1676 0
1677 0

CC(C)(C)OC(=O)\N=C(/NC(=O)OC(C)(C)C)N[C@H]2CCc3cc(OC)c(OC)c(OC)c3C1=CC=C(N
C)C(=O)C=C12 \
1673 0
1674 0
1675 0
1676 0
1677 0

N=C(N)N[C@H]2CCc3cc(OC)c(OC)c(OC)c3C1=CC=C(NC)C(=O)C=C12
1673 0
1674 0
1675 0
1676 0
1677 0

```

[5 rows x 119 columns]

```

[30]: for element in initial_data['SMILES']:
        finger_1 = Chem.RDKFingerprint(Chem.MolFromSmiles(element))
        for i, smi in enumerate(new_df['AI_generated_SMILES']):
            finger_2 = Chem.RDKFingerprint(Chem.MolFromSmiles(smi))
            ta_sim = TanimotoSimilarity(finger_1, finger_2)

```

```

new_df[element].loc[i] = ta_sim
if ta_sim == 1:
    new_df[element][i] = 100

```

```
[31]: new_df.head()
```

```

[31]:
AI_generated_SMILES \
0  COC1=C2C3=CC=C(NC)C(=O)C=C3[C@H1](CCC2=CC(OC)=...
1  COC1=C2C3=CC=C(NC)C(=O)C=C3[C@H1](CCC2=CC(OC)=...
2  COC1=C2C3=CC=C(NC)C(=O)C=C3[C@H1](CCC2=CC(OC)=...
3  COC1=C2C3=CC=C(NC)C(=O)C=C3[C@H1](CCC2=CC(OC)=...
4  COC1=C2C3=CC=C(NC)C(=O)C=C3[C@H1](CCC2=CC(OC)=...

C0c2c3C1=CC=C(SC)C(=O)C=C1[C@H](CCc3cc(OC)c2OC)NCC \
0  0.854604
1  0.802326
2  0.846400
3  0.843949
4  0.844498

C0c2c3C1=CC=C(SC)C(=O)C=C1[C@H](CCc3cc(OC)c2OC)NCCC \
0  0.846400
1  0.794931
2  0.856000
3  0.837411
4  0.854067

C0c2c3C1=CC=C(SC)C(=O)C=C1[C@H](CCc3cc(OC)c2OC)NCCCC \
0  0.843700
1  0.792496
2  0.853270
3  0.834776
4  0.857257

CC(C)CN[C@H]2CCc3cc(OC)c(OC)c(OC)c3C1=CC=C(SC)C(=O)C=C12 \
0  0.842482
1  0.791444
2  0.852029
3  0.833595
4  0.850119

C0c2c3C1=CC=C(SC)C(=O)C=C1[C@H](CCc3cc(OC)c2OC)NCCCCC \
0  0.841687
1  0.790680
2  0.851233
3  0.832810
4  0.855211

```

|   |                                                                          |
|---|--------------------------------------------------------------------------|
|   | <chem>CC(C)CCN[C@H]2CCc3cc(OC)c(OC)c(OC)c3C1=CC=C(SC)C(=O)C=C12 \</chem> |
| 0 | 0.841144                                                                 |
| 1 | 0.790236                                                                 |
| 2 | 0.850675                                                                 |
| 3 | 0.832288                                                                 |
| 4 | 0.854647                                                                 |

|   |                                                                      |
|---|----------------------------------------------------------------------|
|   | <chem>C0c2c3C1=CC=C(SC)C(=O)C=C1[C@H](CCc3cc(OC)c2OC)NCCCCC \</chem> |
| 0 | 0.841270                                                             |
| 1 | 0.790396                                                             |
| 2 | 0.850794                                                             |
| 3 | 0.832420                                                             |
| 4 | 0.854762                                                             |

|   |                                                                           |
|---|---------------------------------------------------------------------------|
|   | <chem>CC(CCC)CN[C@H]2CCc3cc(OC)c(OC)c(OC)c3C1=CC=C(SC)C(=O)C=C12 \</chem> |
| 0 | 0.833989                                                                  |
| 1 | 0.783825                                                                  |
| 2 | 0.843430                                                                  |
| 3 | 0.825311                                                                  |
| 4 | 0.847364                                                                  |

|   |                                                                            |     |
|---|----------------------------------------------------------------------------|-----|
|   | <chem>C0c2c3C1=CC=C(SC)C(=O)C=C1[C@H](CCc3cc(OC)c2OC)NCCCCCCC ... \</chem> |     |
| 0 | 0.840603                                                                   | ... |
| 1 | 0.789794                                                                   | ... |
| 2 | 0.850119                                                                   | ... |
| 3 | 0.831768                                                                   | ... |
| 4 | 0.854084                                                                   | ... |

|   |                                                                               |
|---|-------------------------------------------------------------------------------|
|   | <chem>CCN(CC)C(=S)N[C@H]2CCc3cc(OC)c(OC)c(OC)c3C1=CC=C(NC)C(=O)C=C12 \</chem> |
| 0 | 0.901929                                                                      |
| 1 | 0.917534                                                                      |
| 2 | 0.893312                                                                      |
| 3 | 0.893651                                                                      |
| 4 | 0.889770                                                                      |

|   |                                                                                   |
|---|-----------------------------------------------------------------------------------|
|   | <chem>C=CCN(CC=C)C(=S)N[C@H]2CCc3cc(OC)c(OC)c(OC)c3C1=CC=C(NC)C(=O)C=C12 \</chem> |
| 0 | 0.891270                                                                          |
| 1 | 0.905213                                                                          |
| 2 | 0.882862                                                                          |
| 3 | 0.883229                                                                          |
| 4 | 0.879405                                                                          |

|   |                                                                                 |
|---|---------------------------------------------------------------------------------|
|   | <chem>OCCN(CCO)C(=S)N[C@H]2CCc3cc(OC)c(OC)c(OC)c3C1=CC=C(NC)C(=O)C=C12 \</chem> |
| 0 | 0.891892                                                                        |
| 1 | 0.908875                                                                        |
| 2 | 0.884949                                                                        |

|   |          |
|---|----------|
| 3 | 0.886792 |
| 4 | 0.881476 |

|   |                                                                               |
|---|-------------------------------------------------------------------------------|
|   | <chem>S=C(N[C@H]1CCc3cc(OC)c(OC)c(OC)c3C2=CC=C(NC)C(=O)C=C12)N4CCCC4 \</chem> |
| 0 | 0.893566                                                                      |
| 1 | 0.906003                                                                      |
| 2 | 0.885130                                                                      |
| 3 | 0.885490                                                                      |
| 4 | 0.887579                                                                      |

|   |                                                                                     |
|---|-------------------------------------------------------------------------------------|
|   | <chem>Clc1ccc(cc1)NC(=S)N[C@H]3CCc4cc(OC)c(OC)c(OC)c4C2=CC=C(NC)C(=O)C=C23 \</chem> |
| 0 | 0.877743                                                                            |
| 1 | 0.901961                                                                            |
| 2 | 0.871018                                                                            |
| 3 | 0.869969                                                                            |
| 4 | 0.870543                                                                            |

|   |                                                                                           |
|---|-------------------------------------------------------------------------------------------|
|   | <chem>FC(F)(F)c1ccc(cc1)NC(=S)N[C@H]3CCc4cc(OC)c(OC)c(OC)c4C2=CC=C(NC)C(=O)C=C23 \</chem> |
| 0 | 0.877839                                                                                  |
| 1 | 0.899061                                                                                  |
| 2 | 0.872572                                                                                  |
| 3 | 0.870070                                                                                  |
| 4 | 0.870643                                                                                  |

|   |                                                                                                                         |
|---|-------------------------------------------------------------------------------------------------------------------------|
|   | <chem>O[C@@H](CNC(=S)N[C@H]2CCc3cc(OC)c(OC)c(OC)c3C1=CC=C(NC)C(=O)C=C12)[C@H]4OC(C)(C)O[C@@H]4[C@H]5OC(C)(C)O5 \</chem> |
| 0 | 0.801847                                                                                                                |
| 1 | 0.823738                                                                                                                |
| 2 | 0.797602                                                                                                                |
| 3 | 0.800704                                                                                                                |
| 4 | 0.801128                                                                                                                |

|   |                                                                                                               |
|---|---------------------------------------------------------------------------------------------------------------|
|   | <chem>OC[C@@H](O)[C@@H](O)[C@H](O)[C@@H](O)CNC(=S)N[C@H]2CCc3cc(OC)c(OC)c(OC)c3C1=CC=C(NC)C(=O)C=C12 \</chem> |
| 0 | 0.862519                                                                                                      |
| 1 | 0.883346                                                                                                      |
| 2 | 0.856055                                                                                                      |
| 3 | 0.857903                                                                                                      |
| 4 | 0.858447                                                                                                      |

|   |                                                                                                       |
|---|-------------------------------------------------------------------------------------------------------|
|   | <chem>CC(C)(C)OC(=O)\N=C(/NC(=O)OC(C)(C)C)N[C@H]2CCc3cc(OC)c(OC)c(OC)c3C1=CC=C(NC)C(=O)C=C12 \</chem> |
| 0 | 0.824652                                                                                              |
| 1 | 0.848641                                                                                              |
| 2 | 0.820102                                                                                              |
| 3 | 0.816667                                                                                              |
| 4 | 0.817126                                                                                              |

```

      N=C(N)N[C@H]2CCc3cc(OC)c(OC)c(OC)c3C1=CC=C(NC)C(=O)C=C12
0                                     0.926325
1                                     0.945500
2                                     0.917213
3                                     0.912795
4                                     0.913469

```

[5 rows x 119 columns]

```
[32]: new_df.columns[3:][0]
```

```
[32]: 'C0c2c3C1=CC=C(SC)C(=O)C=C1[C@H](CCc3cc(OC)c2OC)NCCCC'
```

```
[33]: new_df.columns[1:][0]
```

```
[33]: 'C0c2c3C1=CC=C(SC)C(=O)C=C1[C@H](CCc3cc(OC)c2OC)NCC'
```

```
[34]: new_df.tail(n=5)
```

```
[34]:                                     AI_generated_SMILES \
```

```

1673  N([C@H]1)CCC2=CC(OC)=C(OC)C(OC)=C2C3=CC=C(NC)C...
1674  O=C(CNC=C1C(C2=C(OC)C(OC)=C(OC)C=C2CC[C@H]1)1N...
1675  CNC(CNC(=O)OCCN[C@H]1)CCC2=CC(OC)=C(OC)C(OC)=...
1676  O=C(N[C@H]1)CCC2=CC(OC)=C(OC)C(OC)=C2C3=CC=C(N...
1677  C12=C3C(C4=C(OC)C(OC)=C(OC)C=C4CC[C@H]1)3NC(=O...

```

```

      C0c2c3C1=CC=C(SC)C(=O)C=C1[C@H](CCc3cc(OC)c2OC)NCC \
1673                                     0.441733
1674                                     0.468137
1675                                     0.729483
1676                                     0.836622
1677                                     0.702219

```

```

      C0c2c3C1=CC=C(SC)C(=O)C=C1[C@H](CCc3cc(OC)c2OC)NCCC \
1673                                     0.444647
1674                                     0.472783
1675                                     0.725490
1676                                     0.828772
1677                                     0.697443

```

```

      C0c2c3C1=CC=C(SC)C(=O)C=C1[C@H](CCc3cc(OC)c2OC)NCCCC \
1673                                     0.445322
1674                                     0.474328
1675                                     0.727204
1676                                     0.826189
1677                                     0.697872

```



|      |                                                                               |     |
|------|-------------------------------------------------------------------------------|-----|
|      | <chem>CC(C)CN[C@H]2CCc3cc(OC)c(OC)c(OC)c3C1=CC=C(SC)C(=O)C=C12 \</chem>       |     |
| 1673 | 0.446873                                                                      |     |
| 1674 | 0.474070                                                                      |     |
| 1675 | 0.722431                                                                      |     |
| 1676 | 0.825039                                                                      |     |
| 1677 | 0.697098                                                                      |     |
|      | <chem>COc2c3C1=CC=C(SC)C(=O)C=C1[C@H](CCc3cc(OC)c2OC)NCCCCC \</chem>          |     |
| 1673 | 0.445388                                                                      |     |
| 1674 | 0.475260                                                                      |     |
| 1675 | 0.725564                                                                      |     |
| 1676 | 0.824261                                                                      |     |
| 1677 | 0.696391                                                                      |     |
|      | <chem>CC(C)CCN[C@H]2CCc3cc(OC)c(OC)c(OC)c3C1=CC=C(SC)C(=O)C=C12 \</chem>      |     |
| 1673 | 0.447209                                                                      |     |
| 1674 | 0.475290                                                                      |     |
| 1675 | 0.726521                                                                      |     |
| 1676 | 0.823758                                                                      |     |
| 1677 | 0.697313                                                                      |     |
|      | <chem>COc2c3C1=CC=C(SC)C(=O)C=C1[C@H](CCc3cc(OC)c2OC)NCCCCC \</chem>          |     |
| 1673 | 0.446667                                                                      |     |
| 1674 | 0.477411                                                                      |     |
| 1675 | 0.726727                                                                      |     |
| 1676 | 0.823894                                                                      |     |
| 1677 | 0.695131                                                                      |     |
|      | <chem>CC(CCC)CN[C@H]2CCc3cc(OC)c(OC)c(OC)c3C1=CC=C(SC)C(=O)C=C12 \</chem>     |     |
| 1673 | 0.449819                                                                      |     |
| 1674 | 0.476914                                                                      |     |
| 1675 | 0.720774                                                                      |     |
| 1676 | 0.818322                                                                      |     |
| 1677 | 0.692146                                                                      |     |
|      | <chem>COc2c3C1=CC=C(SC)C(=O)C=C1[C@H](CCc3cc(OC)c2OC)NCCCCCCCC ... \</chem>   |     |
| 1673 | 0.447273                                                                      | ... |
| 1674 | 0.478022                                                                      | ... |
| 1675 | 0.726182                                                                      | ... |
| 1676 | 0.823256                                                                      | ... |
| 1677 | 0.694640                                                                      | ... |
|      | <chem>CCN(CC)C(=S)N[C@H]2CCc3cc(OC)c(OC)c(OC)c3C1=CC=C(NC)C(=O)C=C12 \</chem> |     |
| 1673 | 0.473652                                                                      |     |
| 1674 | 0.476647                                                                      |     |
| 1675 | 0.785388                                                                      |     |

|                                                                                                                              |          |
|------------------------------------------------------------------------------------------------------------------------------|----------|
| 1676                                                                                                                         | 0.885917 |
| 1677                                                                                                                         | 0.704735 |
| <br><chem>C=CCN(CC=C)C(=S)N[C@H]2CCc3cc(OC)c(OC)c(OC)c3C1=CC=C(NC)C(=O)C=C12 \</chem>                                        |          |
| 1673                                                                                                                         | 0.475904 |
| 1674                                                                                                                         | 0.481504 |
| 1675                                                                                                                         | 0.779367 |
| 1676                                                                                                                         | 0.875680 |
| 1677                                                                                                                         | 0.701173 |
| <br><chem>OCCN(CCO)C(=S)N[C@H]2CCc3cc(OC)c(OC)c(OC)c3C1=CC=C(NC)C(=O)C=C12 \</chem>                                          |          |
| 1673                                                                                                                         | 0.475875 |
| 1674                                                                                                                         | 0.479714 |
| 1675                                                                                                                         | 0.783825 |
| 1676                                                                                                                         | 0.876265 |
| 1677                                                                                                                         | 0.701451 |
| <br><chem>S=C(N[C@H]1CCc3cc(OC)c(OC)c(OC)c3C2=CC=C(NC)C(=O)C=C12)N4CCCC4 \</chem>                                            |          |
| 1673                                                                                                                         | 0.476506 |
| 1674                                                                                                                         | 0.482100 |
| 1675                                                                                                                         | 0.782805 |
| 1676                                                                                                                         | 0.879377 |
| 1677                                                                                                                         | 0.701863 |
| <br><chem>Clc1ccc(cc1)NC(=S)N[C@H]3CCc4cc(OC)c(OC)c(OC)c4C2=CC=C(NC)C(=O)C=C23 \</chem>                                      |          |
| 1673                                                                                                                         | 0.481949 |
| 1674                                                                                                                         | 0.485714 |
| 1675                                                                                                                         | 0.767857 |
| 1676                                                                                                                         | 0.866923 |
| 1677                                                                                                                         | 0.708966 |
| <br><chem>FC(F)(F)c1ccc(cc1)NC(=S)N[C@H]3CCc4cc(OC)c(OC)c(OC)c4C2=CC=C(NC)C(=O)C=C23 \</chem>                                |          |
| 1673                                                                                                                         | 0.484940 |
| 1674                                                                                                                         | 0.484254 |
| 1675                                                                                                                         | 0.765405 |
| 1676                                                                                                                         | 0.865591 |
| 1677                                                                                                                         | 0.710345 |
| <br><chem>O[C@@H](CNC(=S)N[C@H]2CCc3cc(OC)c(OC)c(OC)c3C1=CC=C(NC)C(=O)C=C12)[C@H]4OC(C)(C)O[C@@H]4[C@H]5COC(C)(C)O5 \</chem> |          |
| 1673                                                                                                                         | 0.493976 |
| 1674                                                                                                                         | 0.506857 |
| 1675                                                                                                                         | 0.728709 |
| 1676                                                                                                                         | 0.802105 |
| 1677                                                                                                                         | 0.682081 |

```

OC[C@@H](O)[C@@H](O)[C@H](O)[C@@H](O)CNC(=S)N[C@H]2CCc3cc(OC)c(OC)c(OC)c3C
1=CC=C(NC)C(=O)C=C12 \
1673 0.481570
1674 0.492317
1675 0.773599
1676 0.853585
1677 0.699661

```

```

CC(C)(C)OC(=O)\N=C(/NC(=O)OC(C)(C)C)N[C@H]2CCc3cc(OC)c(OC)c(OC)c3C1=CC=C(N
C)C(=O)C=C12 \
1673 0.483159
1674 0.496241
1675 0.741002
1676 0.816739
1677 0.691244

```

```

N=C(N)N[C@H]2CCc3cc(OC)c(OC)c(OC)c3C1=CC=C(NC)C(=O)C=C12
1673 0.468712
1674 0.469128
1675 0.802344
1676 0.907767
1677 0.712154

```

[5 rows x 119 columns]

```

[35]: for element in new_df.columns[1:]:
      new_df = new_df.drop(new_df[new_df[element] > 99].index)

```

```

[36]: new_df.shape

```

```

[36]: (1356, 119)

```

```

[37]: new_df.to_excel('../Data/
      ↪Proposed_structures_with_AI_colchicyne_tanimoto_similarity_.xlsx')

```

# Notebook

January 18, 2024

```
[ ]: #####  
# FILE 40  
#####  
  
#Libraries import  
import pandas as pd  
import numpy as np  
from mordred import Calculator, descriptors  
import mordred  
from rdkit import Chem  
from syba.syba import SybaClassifier  
from rdkit.Chem import PandasTools  
import joblib  
  
import sys  
from pathlib import Path  
prediction_mode_path = Path("../module")  
sys.path.append(prediction_mode_path.as_posix())  
import models_creation as pred_model  
  
def is_morder_missing(x):  
    return np.nan if type(x) == mordred.error.Missing or type(x) == mordred.  
↳error.Error else x  
  
if __name__ == "__main__":  
    #load initial structures  
    initial_structures = pd.read_excel('../Data/Kolchicyna_prepared_data.xlsx')  
    initial_structures = list(initial_structures['SMILES'])  
    #load generated structures  
    generated_structures = pd.read_excel('../Data/  
↳Proposed_structures_with_AI_colchicine_tanimoto_similarity.xlsx')  
    generated_structures = list(generated_structures['AI_generated_SMILES'])  
  
    #SYBA application  
    #SYBA classifier compilation  
    mols_ini = [Chem.MolFromSmiles(smi) for smi in initial_structures]  
    mols_gen = [Chem.MolFromSmiles(smi) for smi in generated_structures]
```

```

syba = SybaClassifier()
syba.fitDefaultScore()
SYBA_score_to_initial_structures = [syba.predict(mol=mol) for mol in
↪mols_ini]
SYBA_score_to_generated_structures = [syba.predict(mol=mol) for mol in
↪mols_gen]

threshold = min(SYBA_score_to_initial_structures)
print('The minimal SYBA score is: '+str(threshold))
df_gen = pd.DataFrame(data=generated_structures, columns=['SMILES'])
df_gen['SYBA score'] = SYBA_score_to_generated_structures

df_gen_fin = df_gen[df_gen['SYBA score'] > threshold]
df_gen_fin = df_gen_fin.round({'SYBA score': 2})

#calculate molecular descriptors
mol_objs = [Chem.MolFromSmiles(smi) for smi in df_gen_fin['SMILES']]

calculate_descriptors = True
if calculate_descriptors == True:
    calc = Calculator(descriptors, ignore_3D=True)
    molecular_descriptors = calc.pandas(mol_objs)
    molecular_descriptors = molecular_descriptors.
↪applymap(is_morder_missing)
    molecular_descriptors['SMILES'] = df_gen_fin['SMILES']
    molecular_descriptors.to_excel('../Data/Final_selection.xlsx')
else:
    molecular_descriptors = pd.read_excel('../Data/Final_selection.xlsx')

#assign predicted value
df_gen_fin['A549 [nM]'] = 0
df_gen_fin['BALB/3T3 [nM]'] = 0
df_gen_fin['LoVo [nM]'] = 0
df_gen_fin['LoVo/DX [nM]'] = 0
df_gen_fin['MCF-7 [nM]'] = 0

try:
    #A549
    model = joblib.load('../Activity/Random_forest/
↪random_forest_model_17_estimators_A549.joblib')
    mob = model.predict(molecular_descriptors[list(model.
↪feature_names_in_)])
    converted = pred_model.inverse_transform(mob)
    df_gen_fin['A549 [nM]'] = converted

    #BALB/3T3

```

```

        model = joblib.load('../Activity/Random_forest/
↪random_forest_model_19_estimators_BALB_3T3.joblib')
        mob = model.predict(molecular_descriptors[list(model.
↪feature_names_in_)])
        converted = pred_model.inverse_transform(mob)
        df_gen_fin['BALB/3T3 [nM]'] = converted

        #LoVo
        model = joblib.load('../Activity/Random_forest/
↪random_forest_model_18_estimators_LoVo.joblib')
        mob = model.predict(molecular_descriptors[list(model.
↪feature_names_in_)])
        converted = pred_model.inverse_transform(mob)
        df_gen_fin['LoVo [nM]'] = converted

        #LoVo/DX
        model = joblib.load('../Activity/Random_forest/
↪random_forest_model_14_estimators_LoVo_DX.joblib')
        mob = model.predict(molecular_descriptors[list(model.
↪feature_names_in_)])
        converted = pred_model.inverse_transform(mob)
        df_gen_fin['LoVo/DX [nM]'] = converted

        #MCF-7
        model = joblib.load('../Activity/Random_forest/
↪random_forest_model_3_estimators_MCF-7.joblib')
        mob = model.predict(molecular_descriptors[list(model.
↪feature_names_in_)])
        converted = pred_model.inverse_transform(mob)
        df_gen_fin['MCF-7 [nM]'] = converted

    except:
        print("Error with predicted value...")

    try:

        df_gen_fin = df_gen_fin.drop_duplicates(subset=['SYBA score', 'A549_
↪[nM]', 'BALB/3T3 [nM]', 'LoVo [nM]', 'LoVo/DX [nM]', 'MCF-7 [nM]'],_
↪keep='first')

        df_gen_fin['Mol Image'] = [Chem.MolFromSmiles(smi) for smi in_
↪df_gen_fin['SMILES']]

        PandasTools.SaveXlsxFromFrame(df_gen_fin, '../Data/Whole_report.xlsx',_
↪molCol='Mol Image')

```

```
except:  
    print("Error when inserting images...")
```

# Notebook

December 19, 2023

## 1 File 42

```
[1]: import pandas as pd
from rdkit import Chem
import matplotlib.pyplot as plt
%matplotlib inline
import numpy as np

from rdkit.Chem import PandasTools

from rdkit import Chem
from rdkit.Chem.Draw import IPythonConsole

def show_atom_number(mol, label):
    for atom in mol.GetAtoms():
        atom.SetProp(label, str(atom.GetIdx()+1))
    return mol
```

```
[2]: ## Starting structures stereochemistry
start = pd.read_excel('../Data/Kolchicyna_prepared_data.xlsx')
```

```
[3]: start.head()
```

```
[3]: Unnamed: 0      Publikacja DOI \
0      0  https://doi.org/10.1016/j.bmcl.2021.128382
1      1  https://doi.org/10.1016/j.bmcl.2021.128382
2      2  https://doi.org/10.1016/j.bmcl.2021.128382
3      3  https://doi.org/10.1016/j.bmcl.2021.128382
4      4  https://doi.org/10.1016/j.bmcl.2021.128382
```

```
    Numer związku w publikacji \
0      1
1      2
2      3
3      4
4      5
```

```
SMILES  Atywność [nM]  A549 \
```



```

0  COc2c3C1=CC=C(SC)C(=O)C=C1[C@H](CCc3cc(OC)c2OC...  Atywność [nM]  10,8
1  COc2c3C1=CC=C(SC)C(=O)C=C1[C@H](CCc3cc(OC)c2OC...  Atywność [nM]  11,6
2  COc2c3C1=CC=C(SC)C(=O)C=C1[C@H](CCc3cc(OC)c2OC...  Atywność [nM]  10,9
3  CC(C)CN[C@H]2CCc3cc(OC)c(OC)c(OC)c3C1=CC=C(SC)...  Atywność [nM]  10,5
4  COc2c3C1=CC=C(SC)C(=O)C=C1[C@H](CCc3cc(OC)c2OC...  Atywność [nM]  89,5

```

|   | MCF-7 | LoVo | LoVo/DX | BALB/3T3 | A549_float | MCF-7_float | LoVo_float | \ |
|---|-------|------|---------|----------|------------|-------------|------------|---|
| 0 | 10,3  | 6,5  | 54,9    | 10,2     | 10.8       | 10.3        | 6.5        |   |
| 1 | 12,0  | 8,5  | 31.1    | 14.3     | 11.6       | 12.0        | 8.5        |   |
| 2 | 12,2  | 8,8  | 17,9    | 11,7     | 10.9       | 12.2        | 8.8        |   |
| 3 | 11,3  | 8,5  | 10,2    | 11,0     | 10.5       | 11.3        | 8.5        |   |
| 4 | 92,7  | 52,8 | 77,8    | 99,4     | 89.5       | 92.7        | 52.8       |   |

|   | LoVo/DX_float | BALB/3T3_float |
|---|---------------|----------------|
| 0 | 54.9          | 10.2           |
| 1 | 31.1          | 14.3           |
| 2 | 17.9          | 11.7           |
| 3 | 10.2          | 11.0           |
| 4 | 77.8          | 99.4           |

```
[4]: ## https://www.rdkit.org/docs/RDKit\_Book.html
```

```
[5]: Chem.MolFromSmiles(start['SMILES'][0])
```

```
[5]:
```

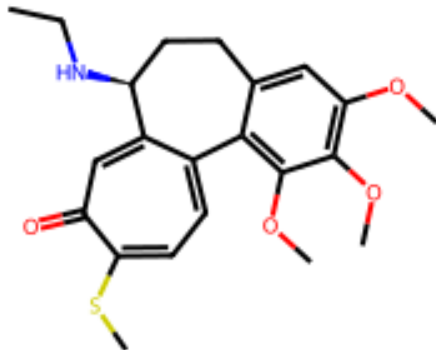

```
[6]: x = Chem.MolFromSmiles(start['SMILES'][0])
Chem.AssignStereochemistry(x)
x
```

```
[6]:
```

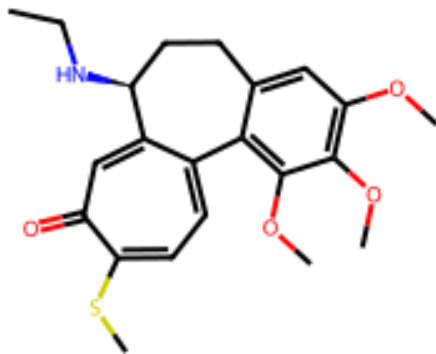

```
[7]: xx = Chem.FindMolChiralCenters(x)
      xx
```

```
[7]: [(14, 'S')]
```

```
[8]: xx[0][1]
```

```
[8]: 'S'
```

```
[9]: atom_num = []
      chirality = []

      for smiles in start['SMILES']:
          mol = Chem.MolFromSmiles(smiles)
          chiral = Chem.FindMolChiralCenters(mol)
          atom_num.append(chiral[0][0])
          chirality.append(chiral[0][1])
      print("Job finished...")
```

Job finished..

```
[10]: start['atom_num'] = atom_num
      start['chirality'] = chirality
      start.head()
```

```
[10]: Unnamed: 0      Publikacja DOI \
0      0  https://doi.org/10.1016/j.bmcl.2021.128382
1      1  https://doi.org/10.1016/j.bmcl.2021.128382
2      2  https://doi.org/10.1016/j.bmcl.2021.128382
3      3  https://doi.org/10.1016/j.bmcl.2021.128382
4      4  https://doi.org/10.1016/j.bmcl.2021.128382

      Numer związku w publikacji \
0      1
```

|   |   |
|---|---|
| 1 | 2 |
| 2 | 3 |
| 3 | 4 |
| 4 | 5 |

|   | SMILES                                                         | Atywność [nM] | A549 \ |
|---|----------------------------------------------------------------|---------------|--------|
| 0 | <chem>C0c2c3C1=CC=C(SC)C(=O)C=C1[C@H](CCc3cc(OC)c2OC...</chem> | Atywność [nM] | 10,8   |
| 1 | <chem>C0c2c3C1=CC=C(SC)C(=O)C=C1[C@H](CCc3cc(OC)c2OC...</chem> | Atywność [nM] | 11,6   |
| 2 | <chem>C0c2c3C1=CC=C(SC)C(=O)C=C1[C@H](CCc3cc(OC)c2OC...</chem> | Atywność [nM] | 10,9   |
| 3 | <chem>CC(C)CN[C@H]2CCc3cc(OC)c(OC)c(OC)c3C1=CC=C(SC)...</chem> | Atywność [nM] | 10,5   |
| 4 | <chem>C0c2c3C1=CC=C(SC)C(=O)C=C1[C@H](CCc3cc(OC)c2OC...</chem> | Atywność [nM] | 89,5   |

|   | MCF-7 | LoVo | LoVo/DX | BALB/3T3 | A549_float | MCF-7_float | LoVo_float \ |
|---|-------|------|---------|----------|------------|-------------|--------------|
| 0 | 10,3  | 6,5  | 54,9    | 10,2     | 10.8       | 10.3        | 6.5          |
| 1 | 12,0  | 8,5  | 31.1    | 14.3     | 11.6       | 12.0        | 8.5          |
| 2 | 12,2  | 8,8  | 17,9    | 11,7     | 10.9       | 12.2        | 8.8          |
| 3 | 11,3  | 8,5  | 10,2    | 11,0     | 10.5       | 11.3        | 8.5          |
| 4 | 92,7  | 52,8 | 77,8    | 99,4     | 89.5       | 92.7        | 52.8         |

|   | LoVo/DX_float | BALB/3T3_float | atom_num | chirality |
|---|---------------|----------------|----------|-----------|
| 0 | 54.9          | 10.2           | 14       | S         |
| 1 | 31.1          | 14.3           | 14       | S         |
| 2 | 17.9          | 11.7           | 14       | S         |
| 3 | 10.2          | 11.0           | 5        | S         |
| 4 | 77.8          | 99.4           | 14       | S         |

```
[11]: r_struct = start[start['chirality'] == 'R']
```

```
[12]: r_struct
```

```
[12]: Unnamed: 0      Publikacja DOI \
22      22  https://doi.org/10.1016/j.bmcl.2021.128382
117     117  https://doi.org/10.1016/j.bmcl.2021.128197
```

```
Numer związku w publikacji \
22      COLCH
117     26
```

|     | SMILES                                                         | Atywność [nM] | A549 \ |
|-----|----------------------------------------------------------------|---------------|--------|
| 22  | <chem>C0c3cc2CC[C@@H](NC(C)=O)c1cc(=O)c(OC)ccc1c2c(O...</chem> | Atywność [nM] | 19,3   |
| 117 | <chem>OC[C@H](O)[C@@H](O)[C@H](O)[C@@H](O)CNC(=S)N[...</chem>  | Atywność [nM] | 930    |

|     | MCF-7 | LoVo | LoVo/DX | BALB/3T3 | A549_float | MCF-7_float | LoVo_float \ |
|-----|-------|------|---------|----------|------------|-------------|--------------|
| 22  | 10,1  | 12,7 | 966,8   | 82,3     | 19.3       | 10.1        | 12.7         |
| 117 | 1200  | 680  | 6600    | 1300     | 930.0      | 1200.0      | 680.0        |

|  | LoVo/DX_float | BALB/3T3_float | atom_num | chirality |
|--|---------------|----------------|----------|-----------|
|--|---------------|----------------|----------|-----------|

|     |        |        |   |   |
|-----|--------|--------|---|---|
| 22  | 966.8  | 82.3   | 7 | R |
| 117 | 6600.0 | 1300.0 | 2 | R |

```
[13]: r_struct_0 = Chem.MolFromSmiles(r_struct['SMILES'][22]) # structure no. 23 in
      ↪Kolchicyna_prepared_data.xlsx
```

```
[14]: r_struct_0 ## correct SMILES is ->
      ↪COc1cc2CC[C@H](NC(C)=O)c3cc(=O)c(OC)ccc3-c2c(OC)c1OC (Marvin Sketch
      ↪Generated)
```

[14]:

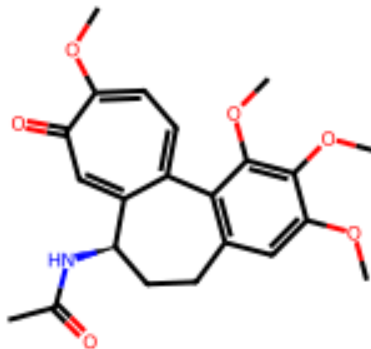

```
[15]: xx = Chem.FindMolChiralCenters(r_struct_0)
      xx
```

[15]: [(7, 'R')]

```
[16]: r_struct['SMILES'][22] # -> This SMILES is for R absolute configuration
      ↪colchicine, and the experiment was conducted for S absolute configuration
      ↪colchicine
```

```
[16]: 'COc3cc2CC[C@@H](NC(C)=O)c1cc(=O)c(OC)ccc1c2c(OC)c3OC'
```

```
[17]: Chem.FindMolChiralCenters(Chem.
      ↪MolFromSmiles('COc1cc2CC[C@H](NC(C)=O)c3cc(=O)c(OC)ccc3-c2c(OC)c1OC'))
```

[17]: [(7, 'S')]

```
[18]: Chem.MolFromSmiles('COc1cc2CC[C@H](NC(C)=O)c3cc(=O)c(OC)ccc3-c2c(OC)c1OC')
```

[18]:

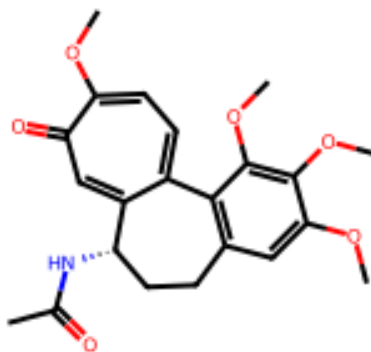

```
[19]: start['chirality'][22] = 'S'
```

C:\Users\aleks\AppData\Local\Temp\ipykernel\_26592\131833170.py:1:

SettingWithCopyWarning:

A value is trying to be set on a copy of a slice from a DataFrame

See the caveats in the documentation: [https://pandas.pydata.org/pandas-docs/stable/user\\_guide/indexing.html#returning-a-view-versus-a-copy](https://pandas.pydata.org/pandas-docs/stable/user_guide/indexing.html#returning-a-view-versus-a-copy)

```
start['chirality'][22] = 'S'
```

```
[20]: r_struct_1 = Chem.MolFromSmiles(r_struct['SMILES'][117])
      r_struct_1
```

[20]:

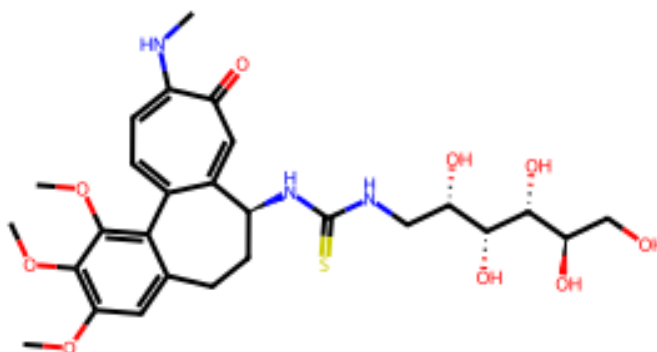

```
[21]: xx = Chem.FindMolChiralCenters(r_struct_1)
      xx
```

```
[21]: [(2, 'R'), (4, 'R'), (6, 'R'), (8, 'S'), (15, 'S')]
```

```
[22]: show_atom_number(r_struct_1, 'atomLabel')
```

[22]:

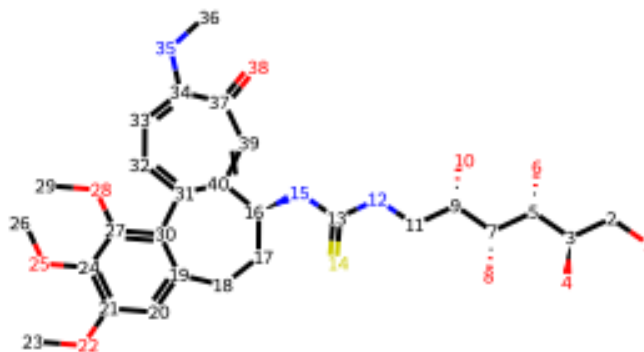

```
[23]: start['chirality'][117] = 'S'
```

C:\Users\aleks\AppData\Local\Temp\ipykernel\_26592\2686388605.py:1:

SettingWithCopyWarning:

A value is trying to be set on a copy of a slice from a DataFrame

See the caveats in the documentation: [https://pandas.pydata.org/pandas-docs/stable/user\\_guide/indexing.html#returning-a-view-versus-a-copy](https://pandas.pydata.org/pandas-docs/stable/user_guide/indexing.html#returning-a-view-versus-a-copy)

```
start['chirality'][117] = 'S'
```

```
[24]: fig, ax = plt.subplots()
bar_container = ax.bar(['S', 'R', 'No chiral center'],
    ↳ [len(start[start['chirality'] == 'S']), len(start[start['chirality'] ==
    ↳ 'R']), len(start[start['chirality'] == 'No chiral center'])])
ax.set(xlabel = 'Absolute configuration of starting structures', ylabel='Number
    ↳ of compounds')
plt.rc('grid', linestyle="-. ", color='black')
plt.grid(False)
ax.bar_label(bar_container, padding=2, label_type='edge')
plt.savefig('chirality_starting.pdf', bbox_inches='tight')
```

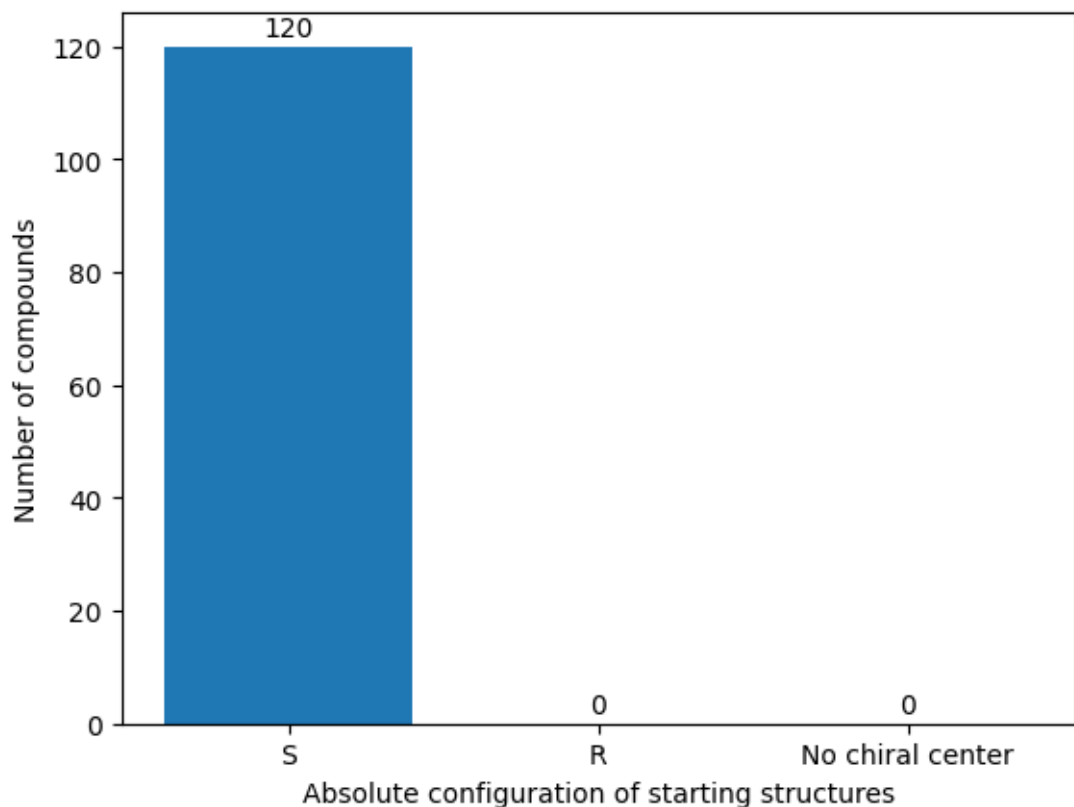

```
[25]: len(start[start['chirality'] == 'No chiral centre'])
```

```
[25]: 0
```

```
[ ]:
```

```
[ ]:
```

```
[26]: for i, smiles in enumerate(start['SMILES']):
        mol = Chem.MolFromSmiles(smiles)
        chiral = Chem.FindMolChiralCenters(mol)
        print(i, chiral)
```

```
0 [(14, 'S')]
1 [(14, 'S')]
2 [(14, 'S')]
3 [(5, 'S')]
4 [(14, 'S')]
5 [(6, 'S')]
6 [(14, 'S')]
7 [(7, 'S')]
8 [(14, 'S')]
```

9 [(14, 'S')]  
10 [(14, 'S')]  
11 [(13, 'S')]  
12 [(9, 'S')]  
13 [(11, 'S')]  
14 [(11, 'S')]  
15 [(9, 'S')]  
16 [(9, 'S')]  
17 [(9, 'S')]  
18 [(9, 'S')]  
19 [(14, 'S')]  
20 [(14, 'S')]  
21 [(14, 'S')]  
22 [(7, 'R')]  
23 [(7, 'S')]  
24 [(7, 'S')]  
25 [(4, 'S')]  
26 [(12, 'S')]  
27 [(13, 'S')]  
28 [(14, 'S')]  
29 [(4, 'S')]  
30 [(13, 'S')]  
31 [(14, 'S')]  
32 [(4, 'S')]  
33 [(16, 'S')]  
34 [(17, 'S')]  
35 [(18, 'S')]  
36 [(4, 'S')]  
37 [(17, 'S')]  
38 [(18, 'S')]  
39 [(4, 'S')]  
40 [(14, 'S')]  
41 [(14, 'S')]  
42 [(13, 'S')]  
43 [(13, 'S')]  
44 [(13, 'S')]  
45 [(13, 'S')]  
46 [(13, 'S')]  
47 [(13, 'S')]  
48 [(13, 'S')]  
49 [(9, 'S')]  
50 [(12, 'S')]  
51 [(13, 'S')]  
52 [(12, 'S')]  
53 [(13, 'S')]  
54 [(13, 'S')]  
55 [(9, 'S')]  
56 [(10, 'S')]



57 [(8, 'S')]  
58 [(16, 'S')]  
59 [(10, 'S')]  
60 [(8, 'S')]  
61 [(24, 'S')]  
62 [(15, 'S')]  
63 [(19, 'S')]  
64 [(16, 'S')]  
65 [(13, 'S')]  
66 [(12, 'S')]  
67 [(24, 'S')]  
68 [(12, 'S')]  
69 [(14, 'S')]  
70 [(14, 'S')]  
71 [(19, 'S')]  
72 [(16, 'S')]  
73 [(13, 'S')]  
74 [(11, 'S')]  
75 [(12, 'S')]  
76 [(13, 'S')]  
77 [(14, 'S')]  
78 [(14, 'S')]  
79 [(15, 'S')]  
80 [(16, 'S')]  
81 [(14, 'S')]  
82 [(14, 'S')]  
83 [(14, 'S')]  
84 [(14, 'S')]  
85 [(5, 'S')]  
86 [(14, 'S')]  
87 [(14, 'S')]  
88 [(14, 'S')]  
89 [(7, 'S')]  
90 [(14, 'S')]  
91 [(9, 'S')]  
92 [(9, 'S')]  
93 [(13, 'S')]  
94 [(13, 'S')]  
95 [(4, 'S')]  
96 [(5, 'S')]  
97 [(7, 'S')]  
98 [(6, 'S')]  
99 [(8, 'S')]  
100 [(10, 'S')]  
101 [(3, 'S')]  
102 [(14, 'S')]  
103 [(11, 'S')]  
104 [(11, 'S')]

```

105 [(14, 'S')]
106 [(4, 'S')]
107 [(5, 'S')]
108 [(8, 'S')]
109 [(6, 'S')]
110 [(8, 'S')]
111 [(10, 'S')]
112 [(10, 'S')]
113 [(3, 'S')]
114 [(11, 'S')]
115 [(14, 'S')]
116 [(1, 'S'), (7, 'S'), (32, 'R'), (38, 'R'), (39, 'R')]
117 [(2, 'R'), (4, 'R'), (6, 'R'), (8, 'S'), (15, 'S')]
118 [(18, 'S')]
119 [(4, 'S')]

```

```
[ ]:
```

```

[27]: to_be_printed = pd.DataFrame(data=start['SMILES'], columns=['SMILES'])
      to_be_printed['Chirality'] = [Chem.FindMolChiralCenters(Chem.
      ↪MolFromSmiles(smiles)) for smiles in to_be_printed['SMILES']]
      to_be_printed['Mol Image'] = [Chem.MolFromSmiles(smi) for smi in
      ↪to_be_printed['SMILES']]
      PandasTools.SaveXlsxFromFrame(to_be_printed, '../Data/
      ↪start_structures_chirality.xlsx', molCol='Mol Image')

```

```
[28]: to_be_printed.head()
```

```

[28]:
          SMILES  Chirality \
0  COc2c3C1=CC=C(SC)C(=O)C=C1[C@H](CCc3cc(OC)c2OC...  [(14, S)]
1  COc2c3C1=CC=C(SC)C(=O)C=C1[C@H](CCc3cc(OC)c2OC...  [(14, S)]
2  COc2c3C1=CC=C(SC)C(=O)C=C1[C@H](CCc3cc(OC)c2OC...  [(14, S)]
3  CC(C)CN[C@H]2CCc3cc(OC)c(OC)c(OC)c3C1=CC=C(SC)...  [(5, S)]
4  COc2c3C1=CC=C(SC)C(=O)C=C1[C@H](CCc3cc(OC)c2OC...  [(14, S)]

```

```

          Mol Image
0  <rdkit.Chem.rdchem.Mol object at 0x00000218896...
1  <rdkit.Chem.rdchem.Mol object at 0x00000218896...
2  <rdkit.Chem.rdchem.Mol object at 0x00000218896...
3  <rdkit.Chem.rdchem.Mol object at 0x00000218896...
4  <rdkit.Chem.rdchem.Mol object at 0x00000218896...

```

```

[29]: mol = Chem.
      ↪MolFromSmiles('OC[C@H](O)[C@H](O)[C@H](O)[C@H](O)CNC(=S)N[C@H]2CCc3cc(OC)c(OC)c(OC)c3C1=
      show_atom_number(mol, 'atomLabel')

```

```
[29]:
```



```
[30]: mol = Chem.MolFromSmiles(to_be_printed.iloc[-2]['SMILES'])
      show_atom_number(mol, 'atomLabel')
```

[30]:

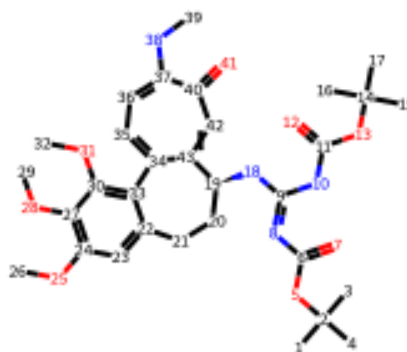

```
[31]: to_be_printed.iloc[-2]['SMILES']
```

```
[31]: 'CC(C)(C)OC(=O)\\N=C(/NC(=O)OC(C)(C)C)N[C@H]2CCc3cc(OC)c(OC)c(OC)c3C1=CC=C(NC)C(=O)C=C12'
```

[ ]:

```
[32]: ## new structures stereochemistry
      new = pd.read_excel('../Data/Whole_report.xlsx')
```

```
[33]: new.head()
```

```
[33]: Unnamed: 0      SMILES  SYBA score \
0      NaN  COC1=C2C3=CC=C(NC)C(=O)C=C3[C@H1](CCC2=CC(OC)=...  45.88
1      NaN  COC1=C2C3=CC=C(NC)C(=O)C=C3[C@H1](CCC2=CC(OC)=...  68.25
2      NaN  COC1=C2C3=CC=C(NC)C(=O)C=C3[C@H1](CCC2=CC(OC)=...  74.22
3      NaN  COC1=C2C3=CC=C(NC)C(=O)C=C3[C@H1](CCC2=CC(OC)=...  40.43
```

4 NaN O=CC1=CN=NN1[C@H1]2CCC3=CC(OC)=C(OC)C(OC)=C3C4... 41.84

|   | A549 [nM] | BALB/3T3 [nM] | LoVo [nM] | LoVo/DX [nM] | MCF-7 [nM] |
|---|-----------|---------------|-----------|--------------|------------|
| 0 | 10.168579 | 6.200000      | 5.700000  | 136.586050   | 8.357629   |
| 1 | 10.648944 | 9.439809      | 17.460496 | 49.797629    | 10.167834  |
| 2 | 11.794066 | 30.305940     | 54.000000 | 37.606395    | 9.099151   |
| 3 | 6.400000  | 23.752895     | 8.570105  | 210.367783   | 5.400000   |
| 4 | 4.774935  | 11.772850     | 10.000000 | 1806.439871  | 12.029326  |

```
[34]: atom_num = []
      chirality = []
      issue = []
      for smiles in new['SMILES']:
          try:
              mol = Chem.MolFromSmiles(smiles)
              chiral = Chem.FindMolChiralCenters(mol)
              atom_num.append(chiral[0][0])
              chirality.append(chiral[0][1])
          except:
              issue.append(smiles)
      print("Job finished...")
```

Job finished...

```
[35]: issue
```

```
[35]: ['CC(=O)N[C@@H1]C1=C2C(C(NC)=CC=C1C3=C(OC)C(OC)=C(OC)C=C3CC2)=O',
      'CNC(NCCCC)=S[C@@H1]C1=CC(=O)C(NC)=CC=C1C2=C(C=C(OC)C(=C2OC)OC)CCF',
      'C1=2[C@H1]CCC3=CC(OC)=C(OC)C(OC(CC)=O)=C3C1=CC=C(C(C=2)=O)SCNC(=O)CSC',
      'O=C(C1=C(C(OCC)=O)N(N=N1)[C@@H1]C2=C3C(C(NC)=CC=C2C4=C(C(OC)=C(OC)C=C4CC3)OC)=O)O',
      'C=12N(N=NC=1C(OCC3=CC=C(C=C3)F)=O)C(OC)=C(OC)C(OC)=CC4=CC=C(C(=O)C=C24)NC',
      'C=1N(N=NC=1C(=O)OCC2=CC=C(C=C2)F)CC(OC)=C(OC)C(OC)=CC3=CC=C(NC)C(=O)C=C3',
      'O=CC1=C(C(OCC)=O)N(N=N1)[C@@H1]C2=C3C(C(NC)=CC=C2C4=C(C(OC)=C(OC)C=C4CC3)OC)=O',
      'O=C(O)C1=C(C(OCC)=O)N=NN1[C@H1]CCC2=CC(OC)=C(OC)C(OC)=C2C3=CC=C(C(C=C3)=O)NC',
      'CCCCCCCCCCCCCCCC(OCC1=CN(N=N1)[C@H1]C2CC3=CC(OC)=C(OC)C(OC)=C3C4=CC=C(C(=O)C=C24)NC)=O',
      'OC(=O)C1=C(C(OCC)=O)N(N=N1)[C@H1]C2CC3=CC(OC)=C(OC)C(OC)=C3C4=CC=C(NC)C(=O)C=C42',
      'N(C)C(=O)NCCC(OCC1=CN(N=N1)[C@H1]CCC2=CC(OC)=C(OC)C(OC)=C2C3=CC=C(C(=O)C=C3)NC=O',
      'CC(C)(C)OC(=O)NCCC(NCC=1N=NN(C=1)[C@H1]C2CC3=CC(OC)=C(OC)C(OC)=C3C4=CC=C(C(=O)C=C24)N)C=O',
      'CC(C)(C)OC(=O)NCCC(OCC=1N=NN(C=1)[C@H1]C2CC3=CC(OC)=C(OC)C(OC)=C3C4=CC=C(C(=O)C=C24)NC)=O',
      'N(C(C)C)CC(=O)OCC1=C2N(N=N1)[C@H1]CCC3=CC(OC)=C(OC)C(OC)=C3C4=CC=C(NC)C(C=C24)=O',
```

```

'CC(CC)N[C@@H1]C1=C2C(C(NC)=CC=C1C3=C(OC)C(OC)=C(OC)C=C3CC2)=0',
'NC(=O)N[C@@H1]C1=C2C(C(NC)=CC=C1C3=C(OC)C(OC)=C(OC)C=C3CC2)=0',
'CC(C)NC(=O)N1[C@@H1]C2=CC(C(NC)=CC=C2C3=C(OC)C(OC)=C(OC)C=C3CC1)=0',
'CC(C)N(C(C)C)C(=O)N[C@@H1]C1=CC(C(NC)=CC=C1C2=C(OC)C(OC)=C(OC)C=C2CC)=0',
'C1=2[C@H1]CCC3=CC(OC)=C(OC)C(OC)=C3C1=CC=C(C(C=2)=O)SCNC(C)=0',
'N(C(C)C)(C(C)C)C(=O)N1[C@H1]CCC2=C(C(OC)=C(OC)C(OC)=C2)C3=CC=C(NC)C(C=C31)=0',
'NC(=S)N1[C@@H1]C2=CC(C(NC)=CC=C2C3=C(OC)C(OC)=C(OC)C=C3CC1)=0',
'OCCN(CCO)C(=S)N1[C@@H1]C2=CC(C(NC)=CC=C2C3=C(OC)C(OC)=C(OC)C=C3CC1)=0',
'CC(C)CCN[C@H1]C1CC2=CC(OC)=C(OC)C(OC)=C2C3=CC=C(SC)C(C=C31)=0',
'OC1=C(C=CC=C1)CN2[C@H1]CCC3=CC(OC)=C(OC)C(OC)=C3C4=CC=C(SC)C(C=C24)=0',
'CC(=O)N1[C@H1]CCC2=CC(OC)=C(OC)C(OC)=C2C3=CC=C(NC)C(C=C31)=0',
'CC(C)(C)OC1=CN(N=N1)[C@H1]C2CC3=CC(OC)=C(OC)C(OC)=C3C4=CC=C(NC)C(=O)C=C42',
'OC(CCC(C)C)OCC1=CN(N=N1)[C@H1]CCC2=CC(OC)=C(OC)C(OC)=C2C3=CC=C(C(=O)C=C3)NC',
'OC1=C(C=CC=C1)C=2N=NN(C=2)[C@H1]C3CC4=CC(OC)=C(OC)C(OC)=C4C5=CC=C(NC)C(=O)C=C5
3',
'OC1=C(C=CC=C1)C=2N=NN(C=2)[C@H1]CCC3=CC(OC)=C(OC)C(OC)=C3C4=CC=C(NC)C(=O)C=C4',
'O=C(OCC)CN(CCC)C[C@H1]C1CC2=CC(OC)=C(OC)C(OC)=C2C3=CC=C(SC)C(=O)C=C31',
'CC(C)(C)OC(=O)NCCC(NCC=1N=NN(C=1)[C@H1]CCC2=CC(OC)=C(OC)C=C2C3=CC=C(NC)C(C=C3)
=O)OC=O',
'CC(C)(C)OCNCCC(=O)NCC1=CN(N=N1)[C@H1]C2CC3=CC(OC)=C(OC)C(OC)=C3C4=CC=C(C(=O)C=
C24)NC=O',
'CC(C)(C)OC(=O)NCCC(OCC=1N=NN(C=1)[C@H1]CCC2=CC(OC)=C(OC)C(=C2C3=CC=C(NC)C(=O)C
=C3)O)C=O',
'O=C(OC(C)(C)C)NCC=1N=NN(C=1)[C@H1]C2CC3=CC(OC)=C(OC)C(OC)=C3C4=CC=C(NC)C(=O)C=
C42',
'CC(C)COC(NCC1=CN(N=N1)[C@H1]C2CC3=CC(OC)=C(OC)C(OC)=C3C4=CC=C(C(=O)C=C24)NC)=O
',
'O=C(OCC)C1=C(C(OCC)=O)N=NN1[C@H1]CCC2=CC(OC)=C(OC)C(OC)=C2C3=CC=C(NC)C(C=C3)=O
',
'CC(CC)N[C@H1]C1CC2=CC(OC)=C(OC)C(OC)=C2C3=CC=C(C(C=C31)=O)NCC',
'CC(CC)N[C@H1]C1CC2=CC(OC)=C(OC)C(OC)=C2C3=CC=C(NC)C(=O)C=C31',
'CCN(CC)C(=O)N[C@H1]C1CC2=CC(OC)=C(OC)C(OC)=C2C3=CC=C(C(C=C31)=O)NC',
'CCN(CC)C(=O)N1[C@H1]CCC2=CC(OC)=C(OC)C(OC)=C2C3=CC=C(NC)C(C=C31)=0',
'NC(=O)N1[C@@H1]C2=CC(C(NC)=CC=C2C3=C(OC)C(OC)=C(OC)C=C3CC1)=0',
'C1=2[C@H1]CCC3=CC(OC)=C(OC)C(OC)=C3C1=CC=C(C(=O)C=2)NCNC(C)=0']

```

```

[36]: mol = Chem.MolFromSmiles(issue[0])
      chiral = Chem.FindMolChiralCenters(mol)
      chiral

```

[36]: []

```

[37]: mol

```

[37]:

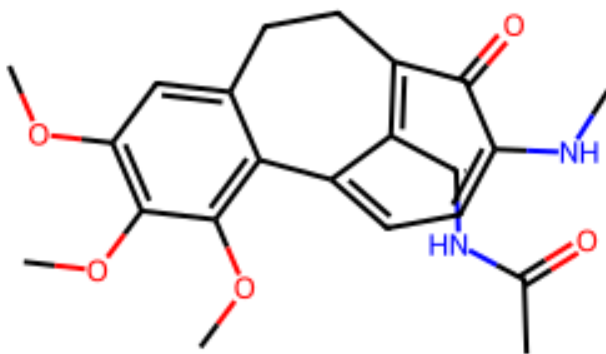

```
[38]: mol = Chem.MolFromSmiles(issue[1])
      chiral = Chem.FindMolChiralCenters(mol)
      print(chiral)
      mol
```

[]

[38]:

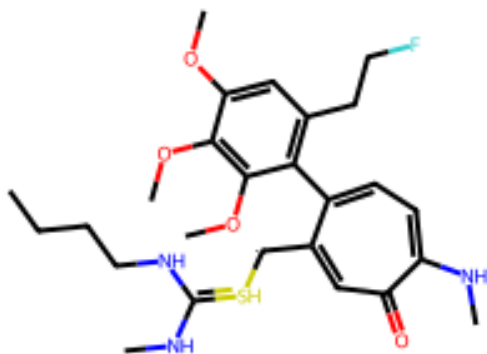

```
[39]: mol = Chem.MolFromSmiles(issue[2])
      chiral = Chem.FindMolChiralCenters(mol)
      print(chiral)
      mol
```

[]

[39]:

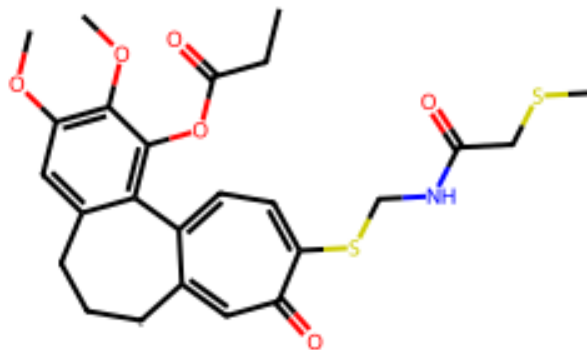

```
[40]: len(issue)
```

```
[40]: 42
```

```
[41]: atom_num = []
chirality = []
issue = []
for smiles in new['SMILES']:
    mol = Chem.MolFromSmiles(smiles)
    chiral = Chem.FindMolChiralCenters(mol)
    try:
        atom_num.append(chiral[0][0])
        chirality.append(chiral[0][1])
    except:
        atom_num.append(0)
        chirality.append('No chiral center')
print("Job finished...")
```

Job finished..

```
[42]: new['atom_num'] = atom_num
new['chirality'] = chirality
new.head()
```

```
[42]:
```

|   | Unnamed: 0 |  | SMILES                                            | SYBA score | \ |
|---|------------|--|---------------------------------------------------|------------|---|
| 0 | NaN        |  | COC1=C2C3=CC=C(NC)C(=O)C=C3[C@H1](CCC2=CC(OC)=... | 45.88      |   |
| 1 | NaN        |  | COC1=C2C3=CC=C(NC)C(=O)C=C3[C@H1](CCC2=CC(OC)=... | 68.25      |   |
| 2 | NaN        |  | COC1=C2C3=CC=C(NC)C(=O)C=C3[C@H1](CCC2=CC(OC)=... | 74.22      |   |
| 3 | NaN        |  | COC1=C2C3=CC=C(NC)C(=O)C=C3[C@H1](CCC2=CC(OC)=... | 40.43      |   |
| 4 | NaN        |  | O=CC1=CN=NN1[C@H1]2CCC3=CC(OC)=C(OC)C(OC)=C3C4... | 41.84      |   |

  

|   | A549 [nM] | BALB/3T3 [nM] | LoVo [nM] | LoVo/DX [nM] | MCF-7 [nM] | atom_num | \ |
|---|-----------|---------------|-----------|--------------|------------|----------|---|
| 0 | 10.168579 | 6.200000      | 5.700000  | 136.586050   | 8.357629   | 14       |   |
| 1 | 10.648944 | 9.439809      | 17.460496 | 49.797629    | 10.167834  | 14       |   |

|   |           |           |           |             |           |    |
|---|-----------|-----------|-----------|-------------|-----------|----|
| 2 | 11.794066 | 30.305940 | 54.000000 | 37.606395   | 9.099151  | 14 |
| 3 | 6.400000  | 23.752895 | 8.570105  | 210.367783  | 5.400000  | 14 |
| 4 | 4.774935  | 11.772850 | 10.000000 | 1806.439871 | 12.029326 | 7  |

|   | chirality |
|---|-----------|
| 0 | S         |
| 1 | S         |
| 2 | S         |
| 3 | S         |
| 4 | S         |

```
[ ]:
```

```
[43]: to_be_printed = pd.DataFrame(data=new['SMILES'], columns=['SMILES'])
chirality = []
for i, smiles in enumerate(new['SMILES']):
    mol = Chem.MolFromSmiles(smiles)

    chiral = Chem.FindMolChiralCenters(mol)
    if len(chiral) > 0:

        chirality.append(chiral)
    else:
        chirality.append('No chiral center')

to_be_printed['Chirality'] = chirality
to_be_printed['Mol Image'] = [Chem.MolFromSmiles(smi) for smi in
    ↪to_be_printed['SMILES']]
PandasTools.SaveXlsxFromFrame(to_be_printed, '../Data/new_structures_chirality.
    ↪xlsx', molCol='Mol Image')
```

```
[ ]:
```

```
[44]: mol = Chem.
    ↪MolFromSmiles('CC(=O)N[C@@H1]C1=C2C(C(NC)=CC=C1C3=C(OC)C(OC)=C(OC)C=C3CC2)=O')
show_atom_number(mol, 'atomLabel')
```

```
[44]:
```

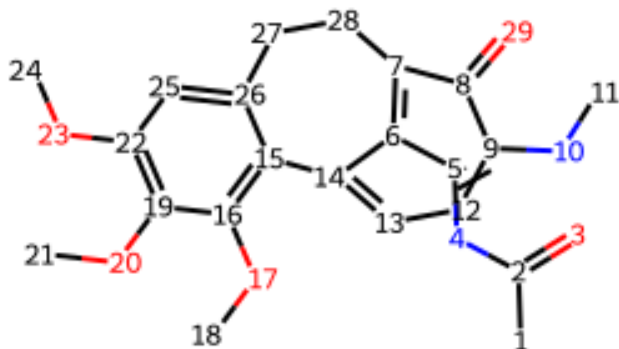



```
[45]: mol = Chem.  
      ↪MolFromSmiles('CN(C(=S)N[C@@H1]1C2=CC(=O)C(NC)=CC=C2C3=C(C=C(OC)C(OC)=C3OC)CC1C)C#N')  
      show_atom_number(mol, 'atomLabel')
```

[45]:

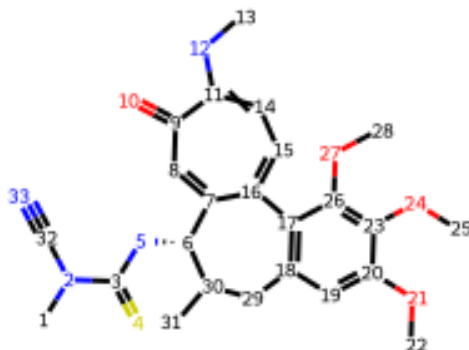

```
[46]: mol = Chem.  
      ↪MolFromSmiles('C1=2[C@H1](CCC3=CC(OC)=C(OC)C(OC)=C3C1=CC=C(C(=O)C=2)NCO)C(C(OC)=O)NC(=O)CNC')  
      show_atom_number(mol, 'atomLabel')
```

[46]:

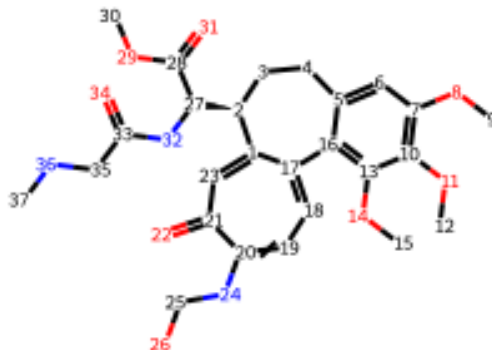

```
[47]: mol = Chem.  
      ↪MolFromSmiles('C[C@H1](NCC)CC1=CC(C(NC)=CC=C1C2=C(C=C(OC)C(OC)=C2OCC3=CC=CC=C3)OSCC)=O')  
      show_atom_number(mol, 'atomLabel')
```

[47]:

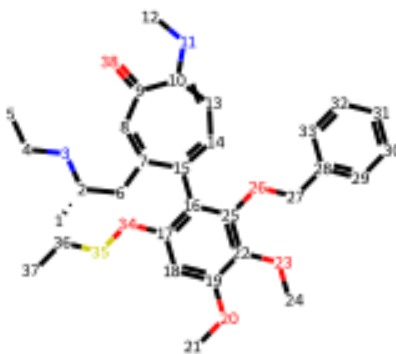

```
[48]: mol = Chem.  
      ↪MolFromSmiles('N1(CCCC1)C(=O)OC2=C(OC)C(OC3)=CC=C2C4=CC=C(SC)C(C=C4[C@@H1](NC(=O)C)CC3)=O')  
      show_atom_number(mol, 'atomLabel')
```

[48]:

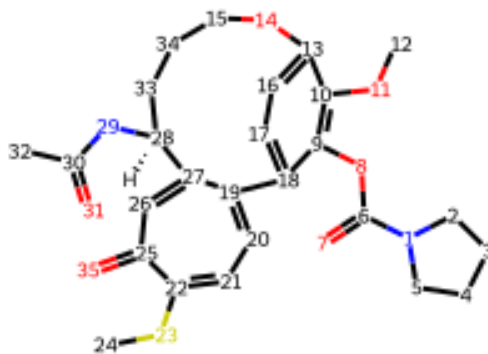

```
[49]: mol = Chem.  
      ↪MolFromSmiles('C1[C@H1](C2=CC(C(SC)=CC=C2C3=C(OC)C(=C(OC)C=C3C1)OC)=O)NCC')
```

[49]:

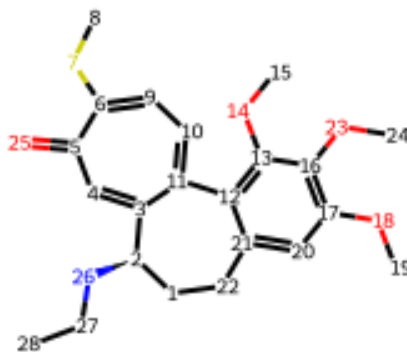

```
[50]: mol = Chem.  
      ↪MolFromSmiles('O=C(OCC)C=1N(N=NC=1C(=O)O2)[C@H1]2NC(=S)N[C@H1]3CCC4=CC(OC)=C(OC)C(OC)=C4C=5
```

```
[50]:
```

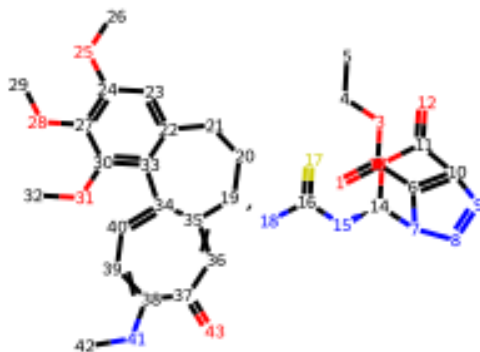

```
[ ]:
```

```
[ ]:
```

```
[ ]:
```

```
[51]: fig, ax = plt.subplots()  
bar_container = ax.bar(['S', 'R', 'No chiral center'],  
      ↪[len(new[new['chirality'] == 'S']), len(new[new['chirality'] == 'R']),  
      ↪len(new[new['chirality'] == 'No chiral center'])])  
ax.set(xlabel = 'Absolute configuration of new structures', ylabel='Number of_  
      ↪compounds')  
plt.rc('grid', linestyle="-.", color='black')  
plt.grid(False)  
ax.bar_label(bar_container, padding=2, label_type='edge')  
plt.savefig('chirality_new.pdf', bbox_inches='tight')
```

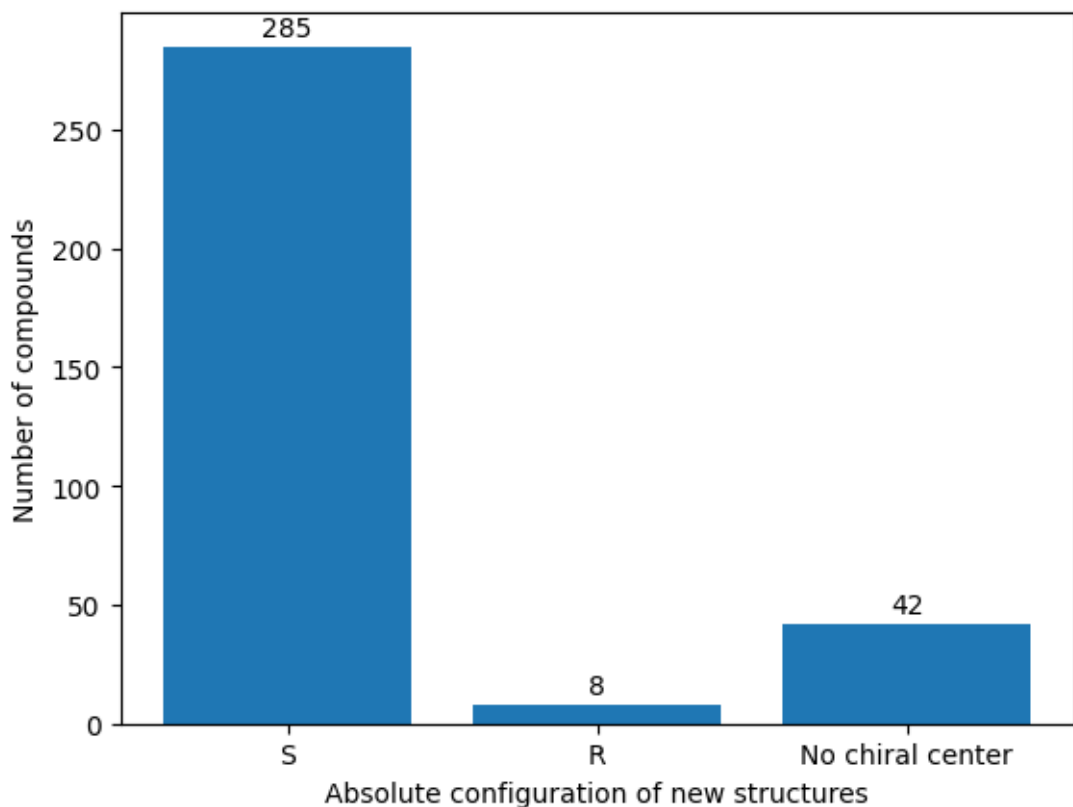

```
[52]: len(new[new['chirality'] == 'S'])
```

```
[52]: 285
```

```
[53]: len(new[new['chirality'] == 'R'])
```

```
[53]: 8
```

```
[54]: len(new[new['chirality'] == 'No chiral center'])
```

```
[54]: 42
```

```
[55]: to_save = new[new['chirality'] == 'S']
      to_save.to_excel('../Data/new_structures_S_chirality.xlsx')
```

```
[ ]:
```

```
[56]: for i, smiles in enumerate(new['SMILES']):
      mol = Chem.MolFromSmiles(smiles)

      chiral = Chem.FindMolChiralCenters(mol)
```

```

if len(chiral) > 0:

    print(i, chiral)
else:
    print(i, 'No chiral center')

```

```

0 [(14, 'S')]
1 [(14, 'S')]
2 [(14, 'S')]
3 [(14, 'S')]
4 [(7, 'S')]
5 [(9, 'S')]
6 [(9, 'S')]
7 [(4, 'S')]
8 [(1, 'S')]
9 [(5, 'S')]
10 [(1, 'S')]
11 [(1, 'R')]
12 [(14, 'S')]
13 [(14, 'S')]
14 [(4, 'S')]
15 [(11, 'S')]
16 [(18, 'S')]
17 [(18, 'S')]
18 [(18, 'S')]
19 [(13, 'S')]
20 [(4, 'S')]
21 [(19, 'S')]
22 [(4, 'S')]
23 [(10, 'S')]
24 [(10, 'S')]
25 [(4, 'S')]
26 No chiral center
27 [(14, 'S')]
28 [(14, 'S')]
29 [(14, 'S')]
30 [(14, 'S')]
31 [(13, 'S')]
32 No chiral center
33 [(5, 'S')]
34 [(7, 'S')]
35 [(13, 'S')]
36 [(13, 'S')]
37 [(24, 'S')]
38 No chiral center
39 [(14, 'S')]
40 [(12, 'S')]
41 [(6, 'S')]

```

42 [(11, 'S')]  
43 No chiral center  
44 [(1, 'S')]  
45 No chiral center  
46 No chiral center  
47 No chiral center  
48 [(9, 'S')]  
49 [(12, 'S')]  
50 [(9, 'S')]  
51 [(13, 'S')]  
52 [(13, 'S')]  
53 [(10, 'S')]  
54 [(8, 'S')]  
55 No chiral center  
56 No chiral center  
57 No chiral center  
58 [(12, 'R')]  
59 No chiral center  
60 [(16, 'S')]  
61 [(1, 'S')]  
62 [(10, 'S')]  
63 [(3, 'S')]  
64 [(14, 'S')]  
65 [(3, 'S')]  
66 [(12, 'S')]  
67 [(9, 'S')]  
68 [(7, 'S')]  
69 [(27, 'S')]  
70 [(7, 'S')]  
71 No chiral center  
72 [(9, 'S')]  
73 [(18, 'S')]  
74 [(9, 'S')]  
75 No chiral center  
76 [(18, 'S')]  
77 [(14, 'S')]  
78 [(14, 'S')]  
79 [(11, 'S')]  
80 [(9, 'S')]  
81 [(12, 'S')]  
82 [(13, 'S')]  
83 [(11, 'S')]  
84 [(11, 'S')]  
85 [(10, 'S')]  
86 [(12, 'S')]  
87 [(20, 'S')]  
88 [(11, 'S')]  
89 [(15, 'S')]

90 [(13, 'S')]  
91 [(20, 'S')]  
92 [(20, 'S')]  
93 No chiral center  
94 [(5, 'S')]  
95 No chiral center  
96 [(14, 'S')]  
97 [(7, 'R')]  
98 [(6, 'S')]  
99 [(2, 'S')]  
100 [(10, 'S')]  
101 [(10, 'S')]  
102 [(8, 'S')]  
103 [(8, 'S')]  
104 [(1, 'S')]  
105 [(1, 'S')]  
106 No chiral center  
107 No chiral center  
108 [(6, 'S')]  
109 [(6, 'S')]  
110 [(1, 'S')]  
111 [(1, 'S')]  
112 [(3, 'S')]  
113 No chiral center  
114 [(6, 'S')]  
115 [(3, 'S')]  
116 [(3, 'S')]  
117 [(14, 'S')]  
118 [(14, 'S')]  
119 [(5, 'S')]  
120 No chiral center  
121 [(1, 'S')]  
122 [(1, 'S')]  
123 [(8, 'S')]  
124 No chiral center  
125 [(11, 'S')]  
126 No chiral center  
127 [(4, 'S')]  
128 [(5, 'S')]  
129 [(8, 'S')]  
130 [(1, 'R')]  
131 [(6, 'S')]  
132 [(6, 'S')]  
133 No chiral center  
134 [(8, 'S')]  
135 [(1, 'S')]  
136 [(6, 'S')]  
137 [(1, 'S')]

138 [(1, 'S')]  
139 [(1, 'S')]  
140 [(7, 'S')]  
141 [(13, 'S')]  
142 [(7, 'S')]  
143 [(3, 'S')]  
144 [(14, 'S')]  
145 [(6, 'S')]  
146 [(14, 'S')]  
147 [(10, 'S')]  
148 [(18, 'S')]  
149 [(14, 'S')]  
150 [(6, 'S')]  
151 [(5, 'S')]  
152 [(6, 'S')]  
153 No chiral center  
154 [(3, 'S')]  
155 [(14, 'S')]  
156 [(13, 'S')]  
157 [(23, 'S')]  
158 [(7, 'S')]  
159 [(8, 'S')]  
160 [(8, 'S')]  
161 [(9, 'S')]  
162 [(9, 'S')]  
163 [(7, 'S')]  
164 [(23, 'S')]  
165 [(8, 'S')]  
166 [(7, 'S')]  
167 [(8, 'S')]  
168 [(7, 'S')]  
169 No chiral center  
170 [(14, 'S')]  
171 [(7, 'S')]  
172 [(10, 'S')]  
173 [(2, 'S')]  
174 [(18, 'S')]  
175 [(24, 'S')]  
176 [(18, 'S')]  
177 [(19, 'S')]  
178 [(5, 'S')]  
179 [(13, 'S')]  
180 [(13, 'S')]  
181 [(20, 'S')]  
182 [(23, 'S')]  
183 [(10, 'S')]  
184 [(17, 'S')]  
185 [(4, 'S')]



186 [(4, 'S')]  
187 [(8, 'S')]  
188 [(5, 'S')]  
189 [(5, 'S')]  
190 [(11, 'S')]  
191 [(8, 'S')]  
192 [(6, 'S')]  
193 [(6, 'S')]  
194 [(12, 'S')]  
195 [(4, 'S')]  
196 [(22, 'S')]  
197 [(4, 'S')]  
198 [(4, 'S')]  
199 No chiral center  
200 [(14, 'S')]  
201 [(1, 'S')]  
202 [(7, 'S')]  
203 [(7, 'S')]  
204 [(5, 'S')]  
205 [(1, 'S')]  
206 [(23, 'S')]  
207 [(13, 'S')]  
208 [(13, 'S')]  
209 [(5, 'S')]  
210 No chiral center  
211 [(10, 'S')]  
212 [(7, 'S')]  
213 No chiral center  
214 [(12, 'S')]  
215 [(1, 'S')]  
216 [(11, 'S')]  
217 No chiral center  
218 No chiral center  
219 [(1, 'S')]  
220 [(8, 'S')]  
221 [(11, 'S')]  
222 [(9, 'S')]  
223 No chiral center  
224 [(9, 'S')]  
225 [(9, 'S')]  
226 [(13, 'S')]  
227 [(13, 'S')]  
228 [(13, 'S')]  
229 [(12, 'S')]  
230 [(12, 'S')]  
231 [(4, 'S')]  
232 [(9, 'S')]  
233 [(10, 'S')]

234 [(11, 'S')]  
235 [(12, 'S')]  
236 [(14, 'S')]  
237 [(9, 'S')]  
238 [(11, 'S')]  
239 [(13, 'S')]  
240 [(11, 'S')]  
241 [(7, 'S')]  
242 [(10, 'R')]  
243 [(10, 'S')]  
244 [(10, 'S')]  
245 [(12, 'S')]  
246 [(10, 'S')]  
247 [(7, 'S')]  
248 [(15, 'S')]  
249 [(7, 'S')]  
250 No chiral center  
251 No chiral center  
252 [(9, 'S')]  
253 [(18, 'S')]  
254 No chiral center  
255 [(9, 'S')]  
256 [(10, 'S')]  
257 [(7, 'S')]  
258 [(14, 'S')]  
259 [(3, 'S')]  
260 [(3, 'S')]  
261 [(3, 'S')]  
262 [(11, 'S')]  
263 No chiral center  
264 [(8, 'S')]  
265 [(13, 'R'), (18, 'S')]  
266 [(14, 'S')]  
267 No chiral center  
268 [(10, 'S')]  
269 [(13, 'S')]  
270 [(20, 'S')]  
271 No chiral center  
272 [(1, 'S')]  
273 No chiral center  
274 No chiral center  
275 [(14, 'S')]  
276 [(14, 'S')]  
277 [(14, 'S')]  
278 [(15, 'S')]  
279 [(8, 'S')]  
280 [(7, 'S')]  
281 [(5, 'S')]

282 [(24, 'S')]  
283 [(16, 'S')]  
284 [(6, 'S')]  
285 [(7, 'S')]  
286 [(10, 'S')]  
287 [(10, 'S')]  
288 No chiral center  
289 No chiral center  
290 [(8, 'S')]  
291 [(16, 'S')]  
292 [(11, 'S')]  
293 [(14, 'S')]  
294 [(1, 'S')]  
295 [(3, 'S')]  
296 [(3, 'S')]  
297 [(1, 'S')]  
298 [(3, 'S')]  
299 [(4, 'S')]  
300 [(11, 'S')]  
301 [(1, 'S')]  
302 [(1, 'S')]  
303 [(10, 'S')]  
304 [(13, 'S')]  
305 [(1, 'R')]  
306 No chiral center  
307 [(5, 'S')]  
308 [(1, 'S')]  
309 [(10, 'S')]  
310 [(16, 'S')]  
311 [(4, 'S')]  
312 [(1, 'S')]  
313 [(9, 'S')]  
314 No chiral center  
315 [(21, 'S')]  
316 [(4, 'S')]  
317 [(4, 'S')]  
318 [(4, 'S')]  
319 [(6, 'S')]  
320 [(7, 'S')]  
321 [(1, 'S')]  
322 [(1, 'R')]  
323 [(1, 'S')]  
324 [(25, 'S')]  
325 [(20, 'S')]  
326 [(5, 'S')]  
327 [(10, 'S')]  
328 [(7, 'S')]  
329 [(16, 'S')]

```
330 [(1, 'S')]
331 [(8, 'S')]
332 [(10, 'S')]
333 [(10, 'S')]
334 [(17, 'S')]
```

[ ]:

[ ]:

# Notebook

December 19, 2023

## 1 File 43

```
[1]: # libraries import
import pandas as pd
import numpy as np
from sklearn.decomposition import PCA
from sklearn.manifold import TSNE

%matplotlib inline
import matplotlib.pyplot as plt
from mpl_toolkits.mplot3d import Axes3D

from rdkit import Chem
from rdkit import DataStructs
from rdkit.Chem import AllChem
import seaborn as sns
```

```
[46]: #initial structures load
initials = pd.read_excel('../Data/Kolchicyna_prepared_data.xlsx')
initials['Initial/new'] = 'Initial'
```

```
[47]: new_structures = pd.read_excel('../Data/
↳Proposed_structures_with_AI_colchicyne_tanimoto_similarity_.xlsx')
new_structures['Initial/new'] = 'New'
new_structures = new_structures.rename(columns={"AI_generated_SMILES" :
↳"SMILES"})
```

```
[48]: whole_df = initials[['SMILES', 'Initial/new']]
whole_df = whole_df.append(new_structures[['SMILES', 'Initial/new']])
```

```
[49]: whole_df.head()
```

```
[49]:
```

|   | SMILES                                                         | Initial/new |
|---|----------------------------------------------------------------|-------------|
| 0 | <chem>C0c2c3C1=CC=C(SC)C(=O)C=C1[C@H](CCc3cc(OC)c2OC...</chem> | Initial     |
| 1 | <chem>C0c2c3C1=CC=C(SC)C(=O)C=C1[C@H](CCc3cc(OC)c2OC...</chem> | Initial     |
| 2 | <chem>C0c2c3C1=CC=C(SC)C(=O)C=C1[C@H](CCc3cc(OC)c2OC...</chem> | Initial     |
| 3 | <chem>CC(C)CN[C@H]2CCc3cc(OC)c(OC)c(OC)c3C1=CC=C(SC)...</chem> | Initial     |
| 4 | <chem>C0c2c3C1=CC=C(SC)C(=O)C=C1[C@H](CCc3cc(OC)c2OC...</chem> | Initial     |

```
[50]: # Molecular fingerprints calculations
class FP:
    """
    Molecular fingerprint class, useful to pack features in pandas df

    Parameters
    -----
    fp : np.array
        Features stored in numpy array
    names : list, np.array
        Names of the features
    """
    def __init__(self, fp, names):
        self.fp = fp
        self.names = names
    def __str__(self):
        return "%d bit FP" % len(self.fp)
    def __len__(self):
        return len(self.fp)

[51]: def fingerprint(mol, radius=2, nBits=1024, useFeatures=False, counts=False,
    dtype=np.float32):
    arr = np.zeros((1,), dtype)
    DataStructs.ConvertToNumpyArray(AllChem.GetMorganFingerprintAsBitVect(mol,
    radius, nBits=nBits, useFeatures=useFeatures), arr)
    return FP(arr, range(nBits))

[52]: # Molecular fingerprints calculations
whole_df['FP'] = [fingerprint(Chem.MolFromSmiles(smi)) for smi in
    whole_df['SMILES']]

[53]: data_ = np.array([x.fp for x in whole_df['FP']])

[54]: # t-SNE analysis
model = TSNE(n_components=2, random_state=0, perplexity=30, n_iter=5000)
tsne_whole_set = model.fit_transform(data_)

[55]: whole_df['TSNE_C1'] = tsne_whole_set.T[0]
whole_df['TSNE_C2'] = tsne_whole_set.T[1]

[56]: # t-SNE plot
sns.pairplot(whole_df, hue='Initial/new', vars=['TSNE_C1', 'TSNE_C2'],
    palette='viridis')

[56]: <seaborn.axisgrid.PairGrid at 0x165bcb0db20>
```

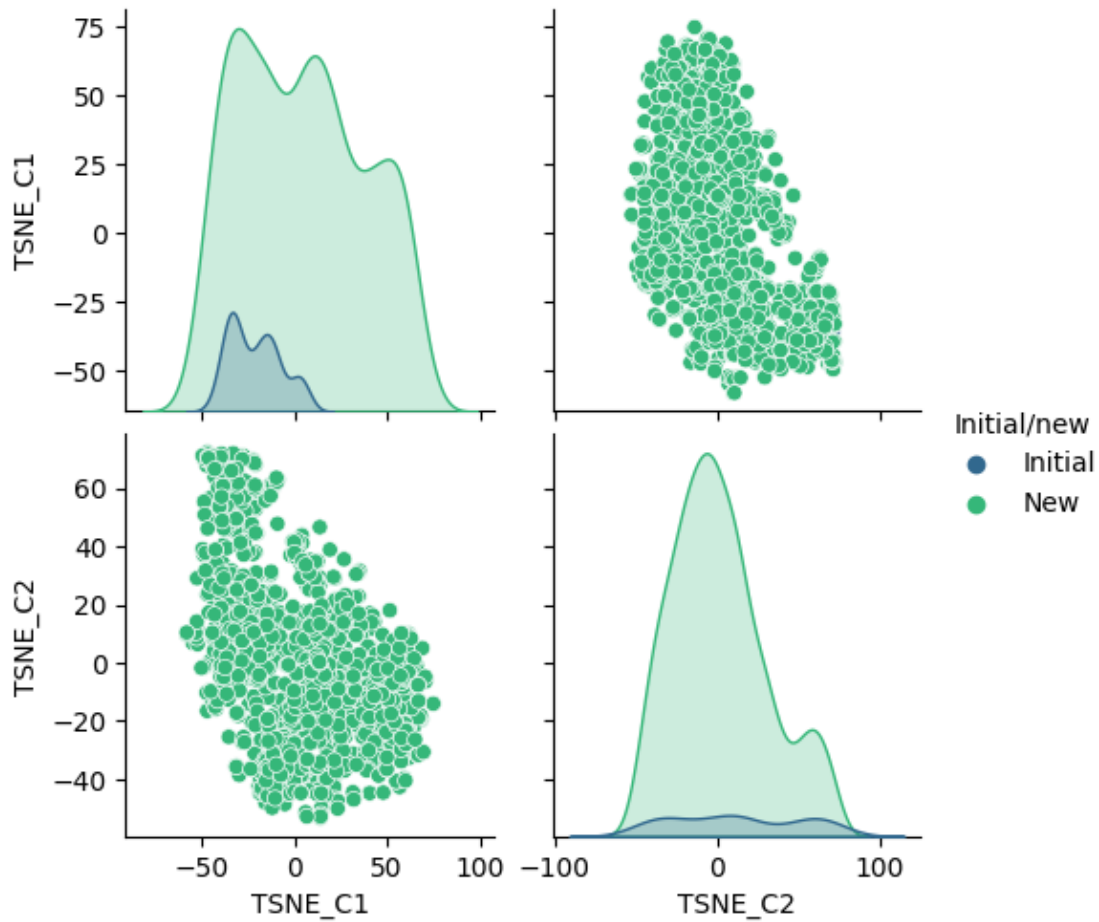

```
[57]: x_t = whole_df.loc[whole_df['Initial/new'] == 'Initial']
      len(x_t)
```

[57]: 120

```
[58]: x_r = whole_df.loc[whole_df['Initial/new'] == 'New']
      len(x_r)
```

[58]: 1356

```
[59]: fig = plt.figure(figsize=(20,20))
      ax = fig.add_subplot(111)

      ax.scatter(x_r['TSNE_C1'], x_r['TSNE_C2'], c='r', marker="o", label='New') #,
      ↪alpha=1
      ax.scatter(x_t['TSNE_C1'], x_t['TSNE_C2'], c='b', marker="s",
      ↪label='Initial')#, alpha=0.1
      plt.legend(loc='lower right', fontsize=24)
```

```
plt.xlabel('TSNE_C1', fontweight='bold', fontsize=24)
plt.ylabel('TSNE_C2', fontweight='bold', fontsize=24)
plt.rc('grid', linestyle="-.", color='black')
plt.grid(True)
plt.savefig('t-SNE_analysis_all_generated_no_PCA.pdf', bbox_inches='tight')
plt.show()
```

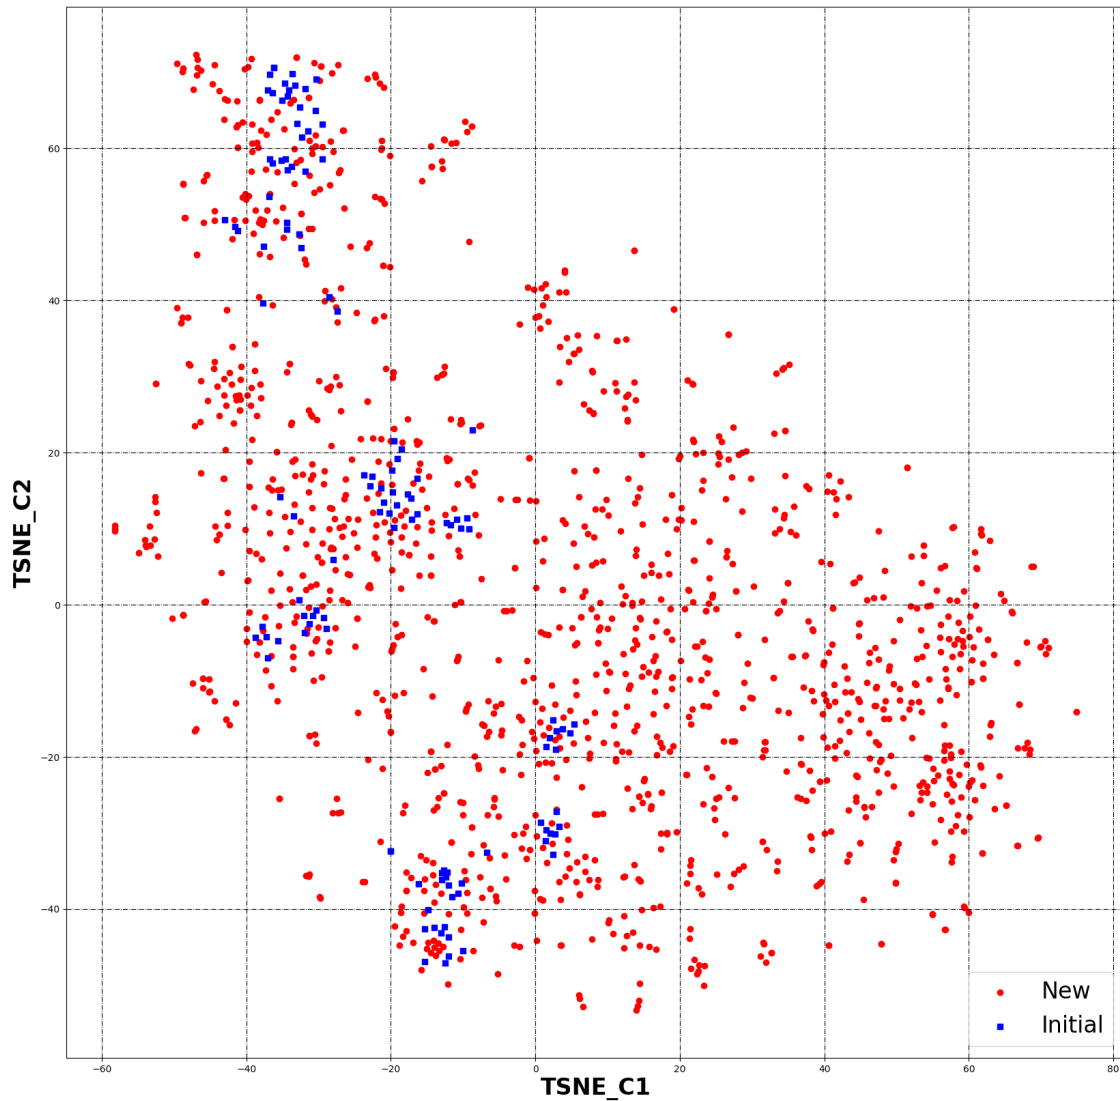

```
[16]: # PCA analysis
pca = PCA(n_components=5, random_state=42) #n_components=20 in the case of ↵
↵activity_pred_app
pca_training_whole = pca.fit_transform(data_)
```



```
[17]: list_pca = []
      for i in range(5):
          list_pca.append('PC'+str(i+1))

[18]: for pca_ in range(5):
      whole_df[list_pca[pca_]] = pca_training_whole.T[pca_]

[19]: sns.pairplot(whole_df, hue='Initial/new', vars=list_pca, palette='viridis')

[19]: <seaborn.axisgrid.PairGrid at 0x165b06e2940>
```

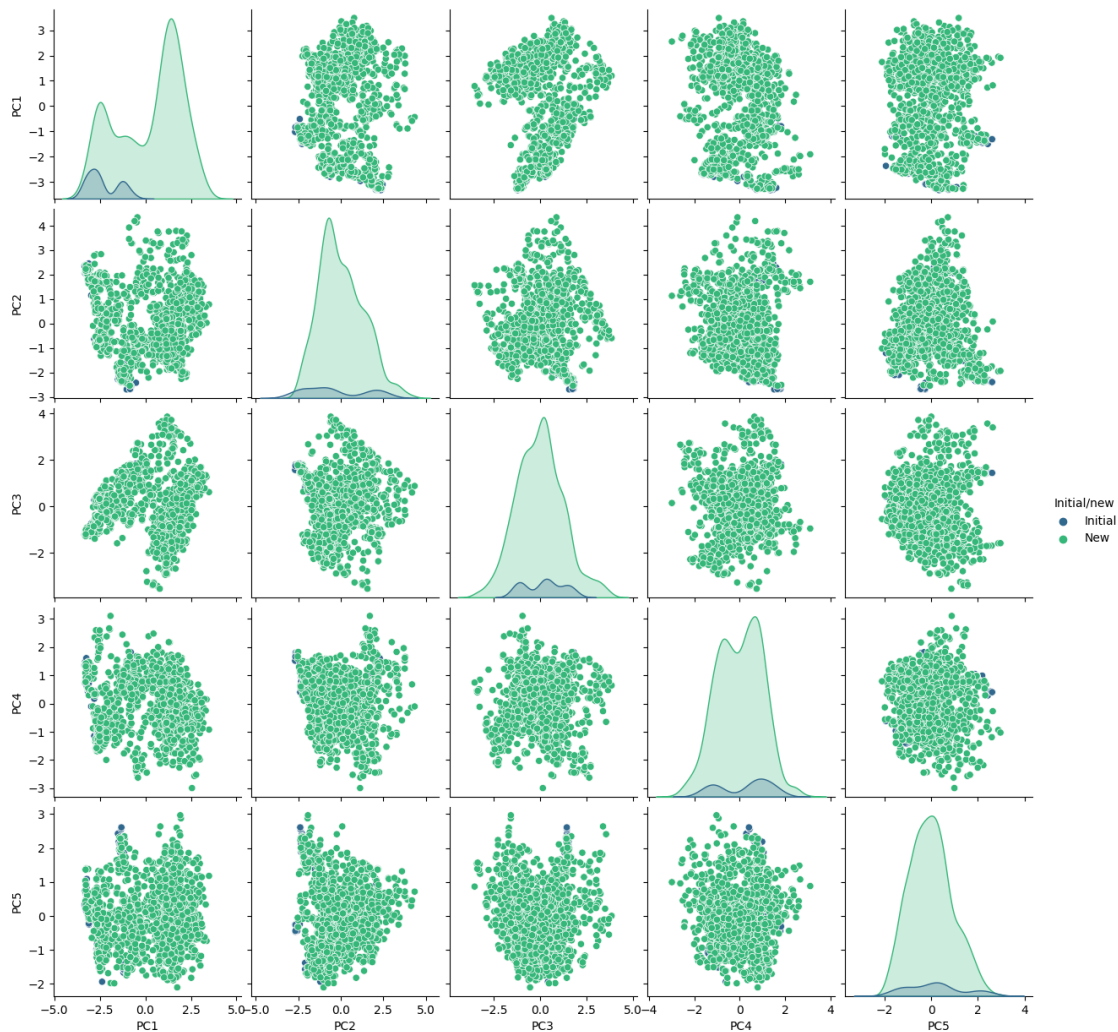

```
[20]: # t-SNE analysis
      model = TSNE(n_components=2, random_state=0, perplexity=30, n_iter=5000)
      tsne_whole_set = model.fit_transform(pca_training_whole)
```

```
[21]: whole_df['TSNE_C1'] = tsne_whole_set.T[0]
whole_df['TSNE_C2'] = tsne_whole_set.T[1]
```

```
[22]: # t-SNE plot
sns.pairplot(whole_df, hue='Initial/new', vars=['TSNE_C1', 'TSNE_C2'],
            palette='viridis')
```

```
[22]: <seaborn.axisgrid.PairGrid at 0x165b53903a0>
```

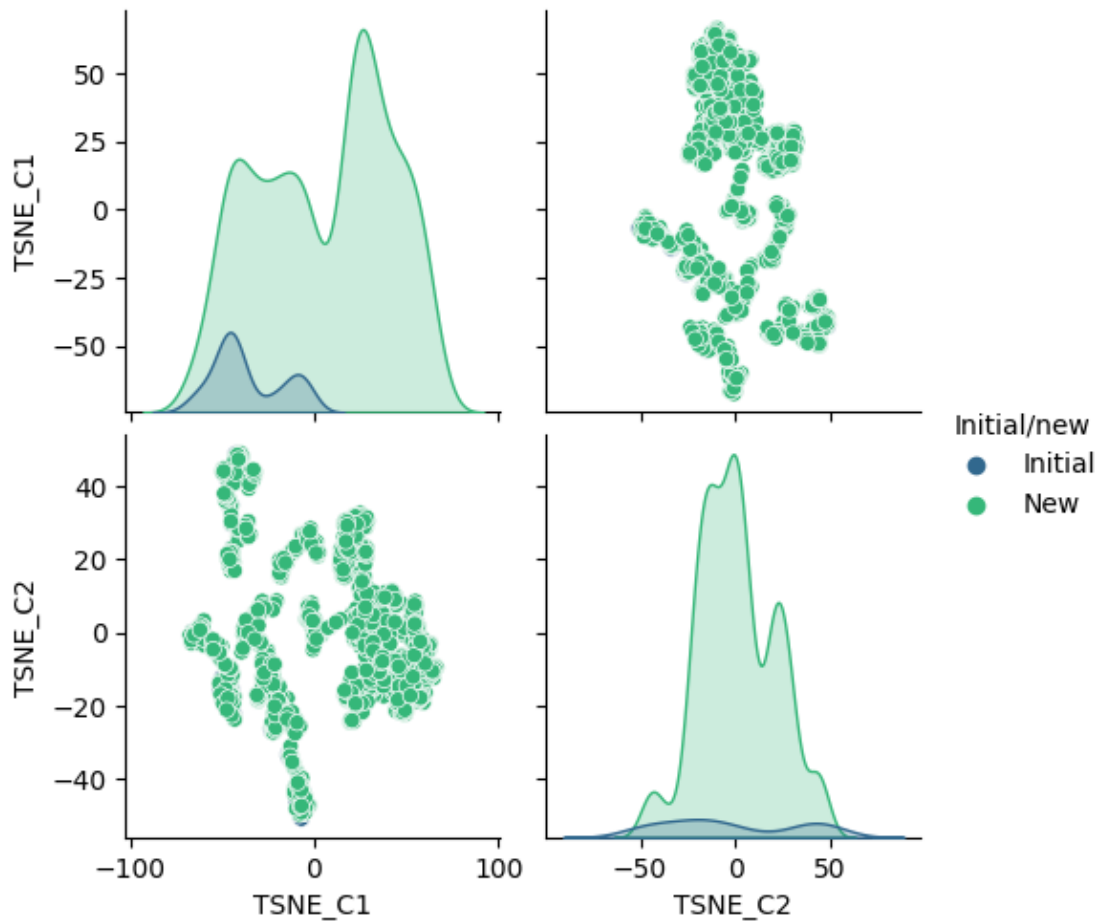

```
[23]: x_t = whole_df.loc[whole_df['Initial/new'] == 'Initial']
print(len(x_t))
x_r = whole_df.loc[whole_df['Initial/new'] == 'New']
len(x_r)
```

```
120
```

```
[23]: 1356
```

```
[24]: fig = plt.figure(figsize=(20,20))
ax = fig.add_subplot(111)

ax.scatter(x_r['TSNE_C1'], x_r['TSNE_C2'], c='r', marker="o", label='New') #,
    ↪alpha=1
ax.scatter(x_t['TSNE_C1'], x_t['TSNE_C2'], c='b', marker="s",
    ↪label='Initial')#, alpha=0.1
plt.legend(loc='lower right', fontsize=24)
plt.xlabel('TSNE_C1', fontweight='bold', fontsize=24)
plt.ylabel('TSNE_C2', fontweight='bold', fontsize=24)
plt.rc('grid', linestyle="-.", color='black')
plt.grid(True)
plt.savefig('t-SNE_analysis_all_generated.pdf', bbox_inches='tight')
plt.show()
```

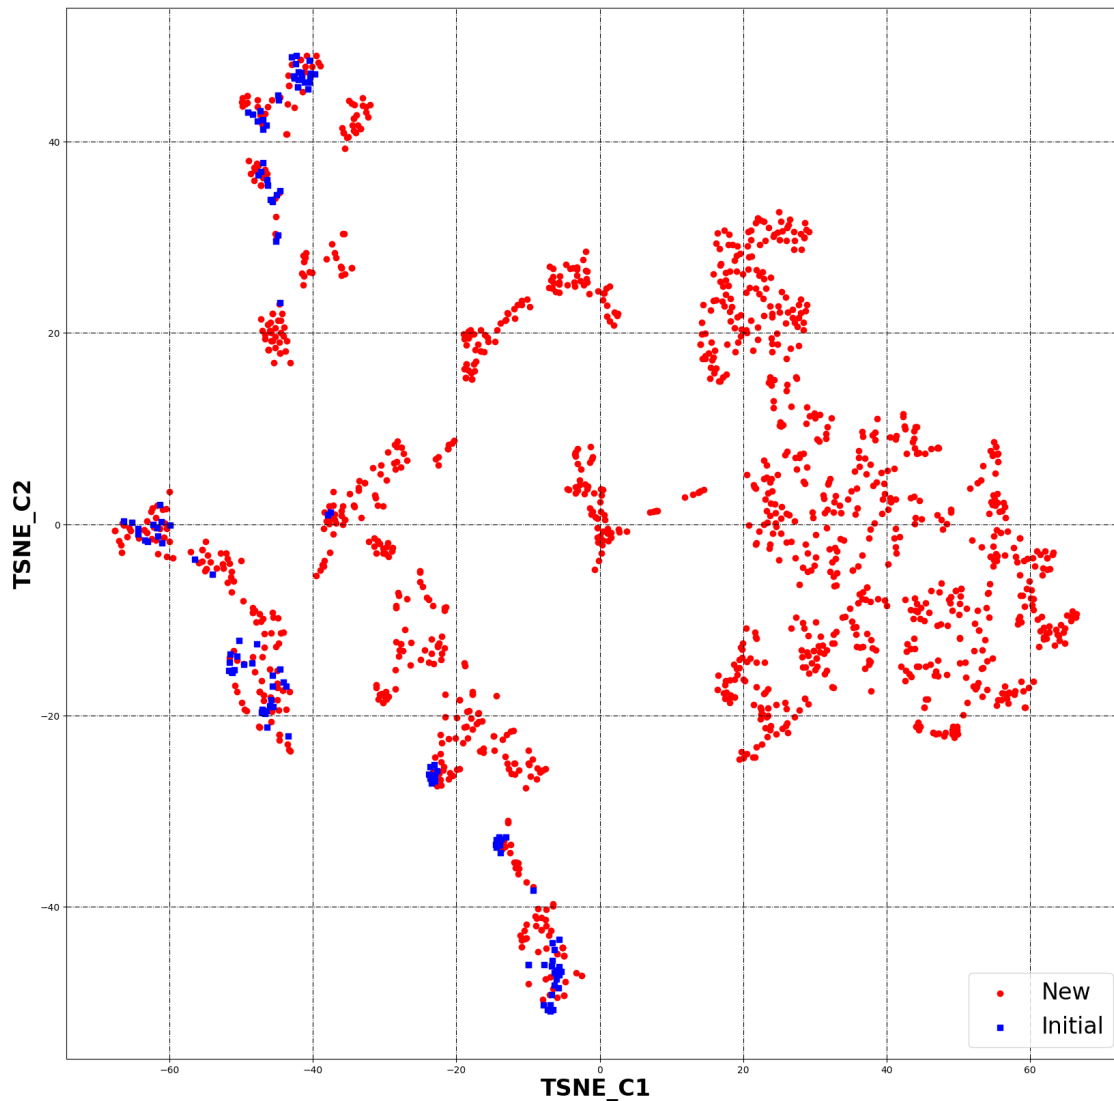

## 1.1 Only structures that are selected

```
[25]: new_structures = pd.read_excel('../Data/Whole_report.xlsx')
      new_structures['Initial/new'] = 'New'
```

```
[26]: whole_df_ = initials[['SMILES', 'Initial/new']]
      whole_df_ = whole_df_.append(new_structures[['SMILES', 'Initial/new']])
```

```
[27]: # Molecular fingerprints calculations
      whole_df_['FP'] = [fingerprint(Chem.MolFromSmiles(smi)) for smi in
      ↪whole_df_['SMILES']]
```

```
[28]: data_ = np.array([x.fp for x in whole_df_['FP']])
```

```
[29]: # t-SNE analysis
      model = TSNE(n_components=2, random_state=0, perplexity=30, n_iter=5000)
      tsne_whole_set = model.fit_transform(data_)
```

```
[30]: whole_df_['TSNE_C1'] = tsne_whole_set.T[0]
      whole_df_['TSNE_C2'] = tsne_whole_set.T[1]
```

```
[31]: # t-SNE plot
      sns.pairplot(whole_df_, hue='Initial/new', vars=['TSNE_C1', 'TSNE_C2'],
      ↪palette='viridis')
```

```
[31]: <seaborn.axisgrid.PairGrid at 0x165a8391d30>
```

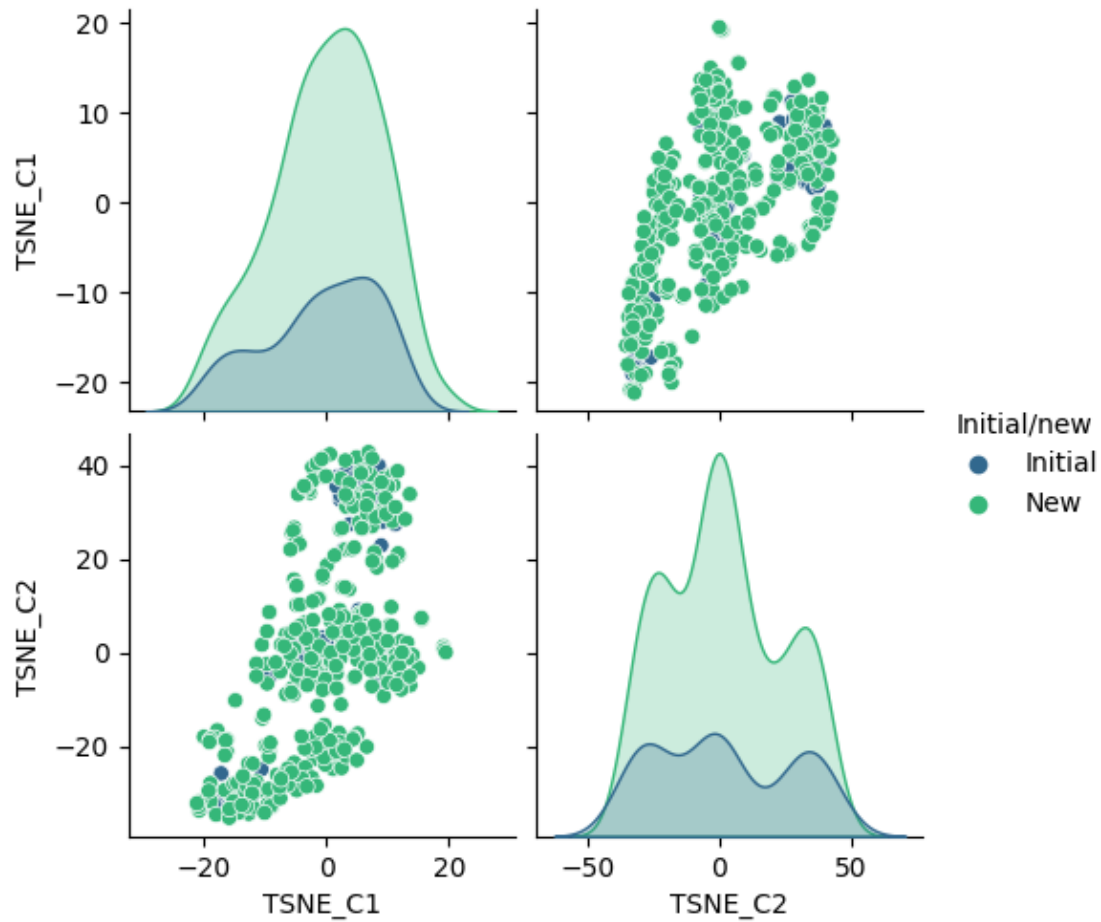

```
[32]: x_t = whole_df.loc[whole_df['Initial/new'] == 'Initial']
      len(x_t)
```

[32]: 120

```
[33]: x_r = whole_df.loc[whole_df['Initial/new'] == 'New']
      len(x_r)
```

[33]: 335

```
[34]: fig = plt.figure(figsize=(20,20))
      ax = fig.add_subplot(111)

      ax.scatter(x_r['TSNE_C1'], x_r['TSNE_C2'], c='r', marker="o", label='New') #,
      ↪alpha=1
      ax.scatter(x_t['TSNE_C1'], x_t['TSNE_C2'], c='b', marker="s",
      ↪label='Initial')#, alpha=0.1
      plt.legend(loc='lower right', fontsize=24)
```

```
plt.xlabel('TSNE_C1', fontweight='bold', fontsize=24)
plt.ylabel('TSNE_C2', fontweight='bold', fontsize=24)
plt.rc('grid', linestyle="-.", color='black')
plt.grid(True)
plt.savefig('t-SNE_analysis_selected_generated_PCA_2.pdf', bbox_inches='tight')
plt.show()
```

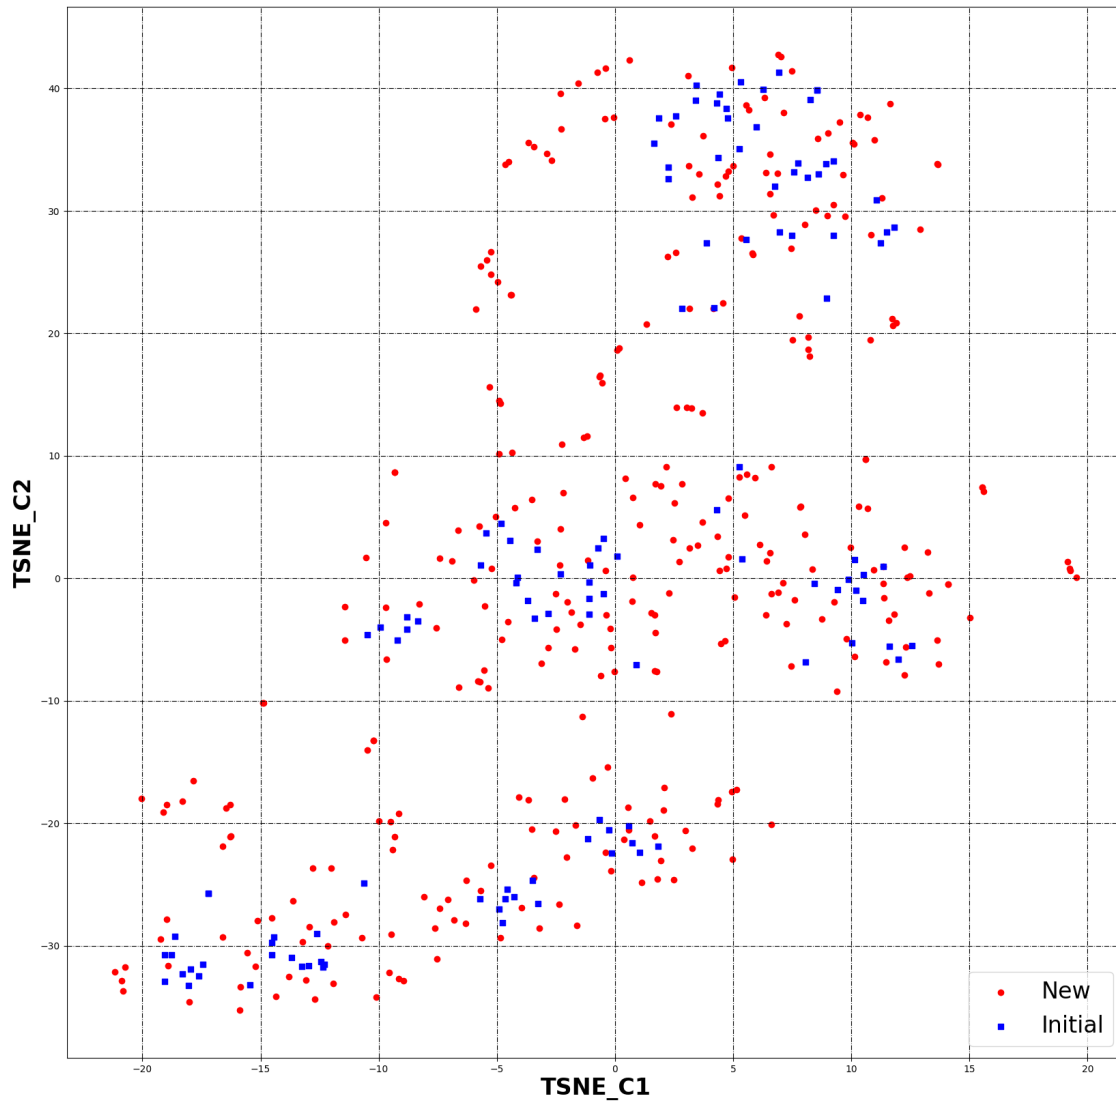

[ ]:

```
[35]: # PCA analysis
pca = PCA(n_components=5, random_state=42) #n_components=20 in the case of
↪activity_pred_app
pca_training_whole = pca.fit_transform(data_)
```

```
[36]: list_pca = []
      for i in range(5):
          list_pca.append('PC'+str(i+1))
```

```
[37]: for pca_ in range(5):
      whole_df_[list_pca[pca_]] = pca_training_whole.T[pca_]
```

```
[38]: sns.pairplot(whole_df_, hue='Initial/new', vars=list_pca, palette='viridis')
```

```
[38]: <seaborn.axisgrid.PairGrid at 0x165b08eef70>
```

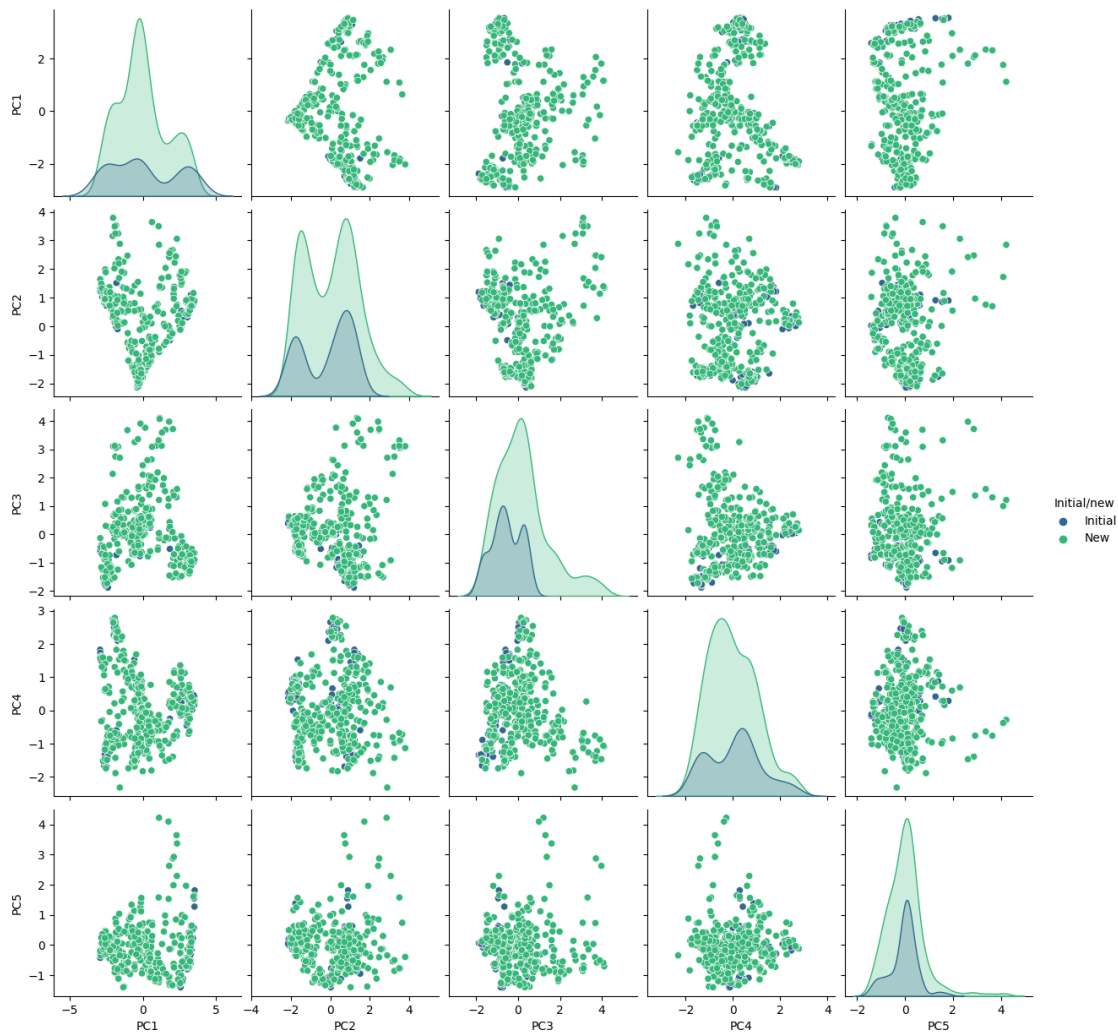

```
[39]: # t-SNE analysis
      model = TSNE(n_components=2, random_state=0, perplexity=30, n_iter=5000)
      tsne_whole_set = model.fit_transform(pca_training_whole)
```

```
[40]: whole_df_['TSNE_C1'] = tsne_whole_set.T[0]
whole_df_['TSNE_C2'] = tsne_whole_set.T[1]
```

```
[41]: # t-SNE plot
sns.pairplot(whole_df_, hue='Initial/new', vars=['TSNE_C1', 'TSNE_C2'],
            palette='viridis')
```

```
[41]: <seaborn.axisgrid.PairGrid at 0x165ba9243a0>
```

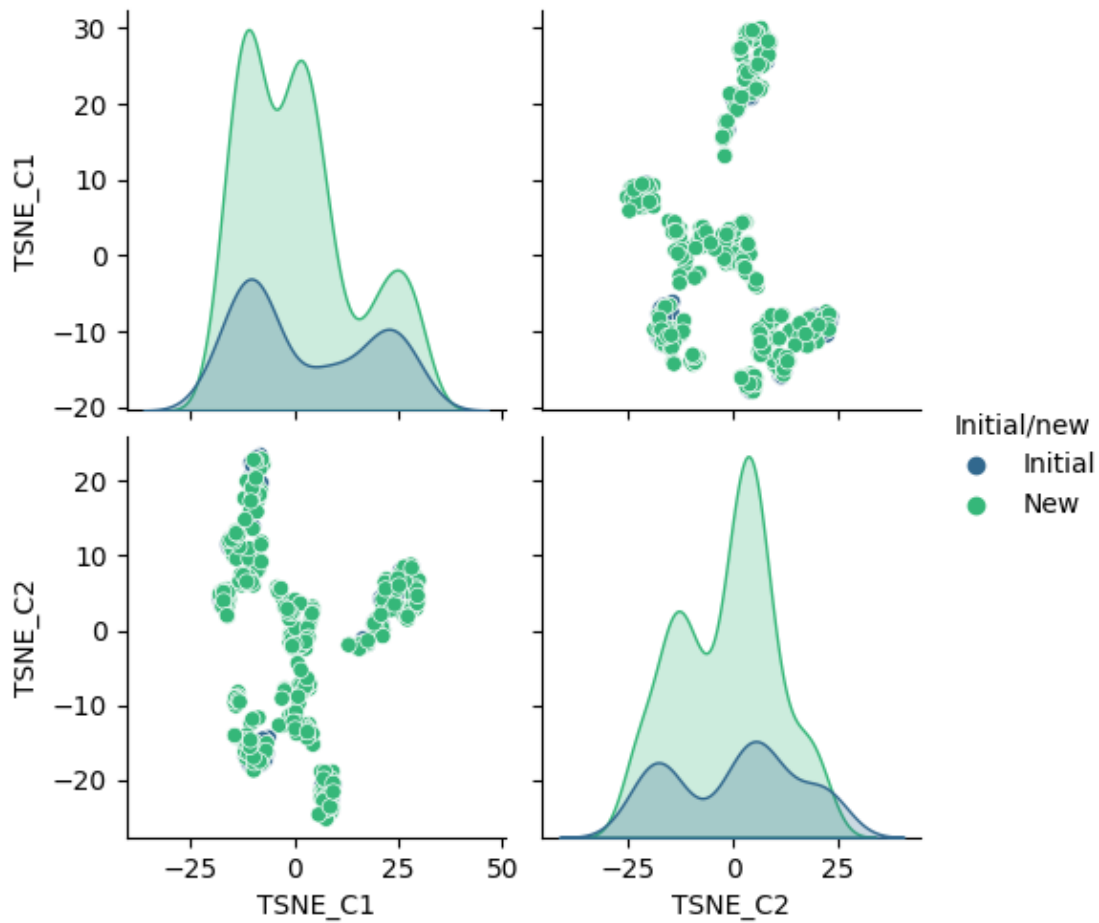

```
[42]: x_t = whole_df_.loc[whole_df_['Initial/new'] == 'Initial']
print(len(x_t))
x_r = whole_df_.loc[whole_df_['Initial/new'] == 'New']
len(x_r)
```

```
120
```

```
[42]: 335
```



```
[43]: fig = plt.figure(figsize=(20,20))
ax = fig.add_subplot(111)

ax.scatter(x_r['TSNE_C1'], x_r['TSNE_C2'], c='r', marker="o", label='New') #,
↳alpha=1
ax.scatter(x_t['TSNE_C1'], x_t['TSNE_C2'], c='b', marker="s",
↳label='Initial')#, alpha=0.1
plt.legend(loc='lower right', fontsize=24)
plt.xlabel('TSNE_C1', fontweight='bold', fontsize=24)
plt.ylabel('TSNE_C2', fontweight='bold', fontsize=24)
plt.rc('grid', linestyle="-.", color='black')
plt.grid(True)
plt.savefig('t-SNE_analysis_all_generated_PCA_5.pdf', bbox_inches='tight')
plt.show()
```

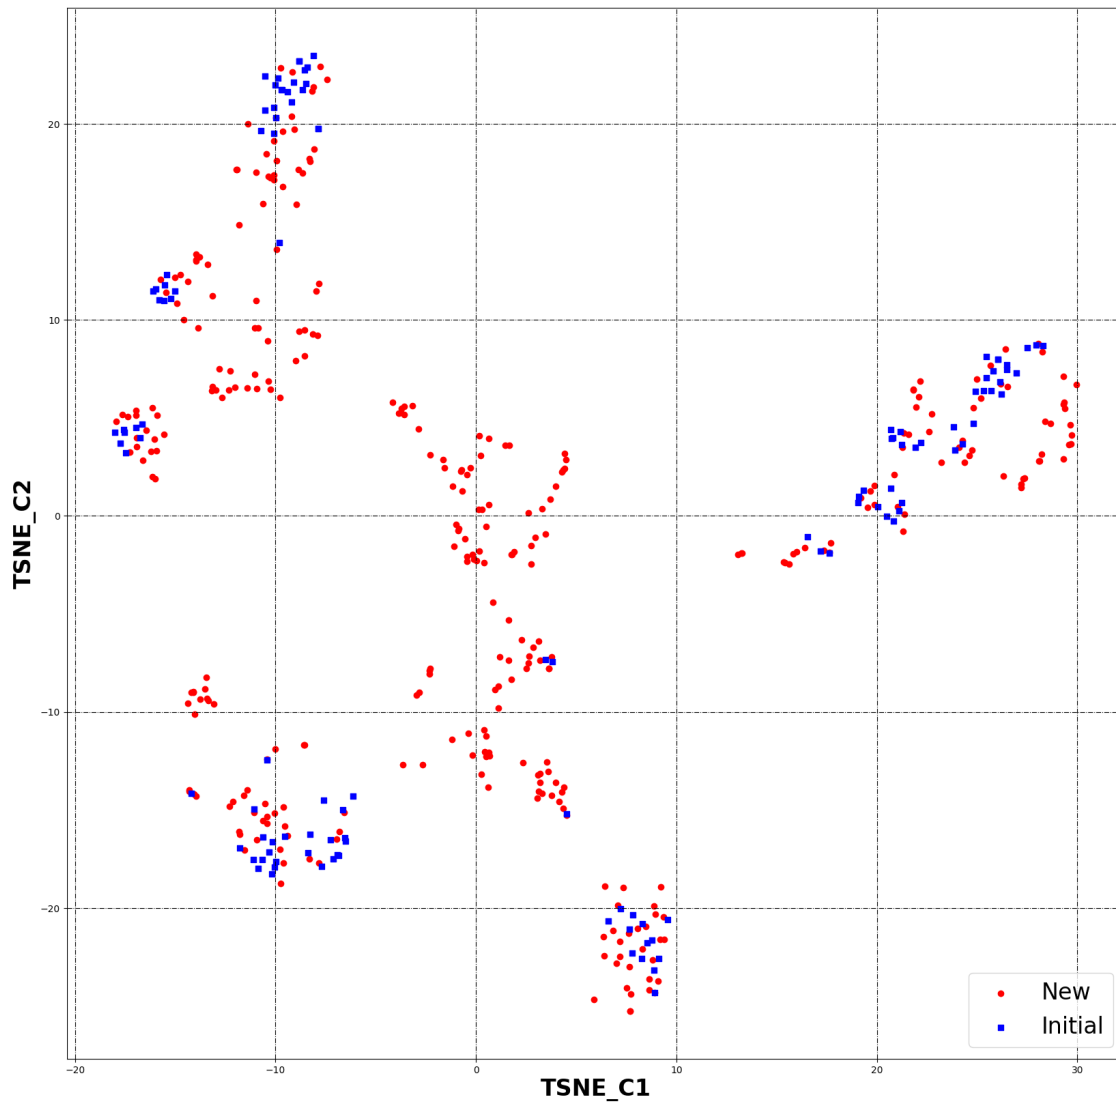

```
[44]: whole_df_.head()
```

```
[44]:
```

|   | SMILES                                                         | Initial/new | FP       | \  |
|---|----------------------------------------------------------------|-------------|----------|----|
| 0 | <chem>C0c2c3C1=CC=C(SC)C(=O)C=C1[C@H](CCc3cc(OC)c2OC...</chem> | Initial     | 1024 bit | FP |
| 1 | <chem>C0c2c3C1=CC=C(SC)C(=O)C=C1[C@H](CCc3cc(OC)c2OC...</chem> | Initial     | 1024 bit | FP |
| 2 | <chem>C0c2c3C1=CC=C(SC)C(=O)C=C1[C@H](CCc3cc(OC)c2OC...</chem> | Initial     | 1024 bit | FP |
| 3 | <chem>CC(C)CN[C@H]2CCc3cc(OC)c(OC)c(OC)c3C1=CC=C(SC)...</chem> | Initial     | 1024 bit | FP |
| 4 | <chem>C0c2c3C1=CC=C(SC)C(=O)C=C1[C@H](CCc3cc(OC)c2OC...</chem> | Initial     | 1024 bit | FP |

  

|   | TSNE_C1    | TSNE_C2   | PC1       | PC2      | PC3       | PC4       | PC5       |
|---|------------|-----------|-----------|----------|-----------|-----------|-----------|
| 0 | -10.516629 | 20.702110 | -2.562503 | 0.952497 | -1.505651 | -1.099564 | -0.178360 |
| 1 | -9.104795  | 22.109497 | -2.609674 | 0.952670 | -1.650509 | -1.440522 | 0.029450  |
| 2 | -8.091981  | 23.488331 | -2.470824 | 0.717305 | -1.650362 | -1.689266 | 0.085596  |
| 3 | -10.093107 | 20.833193 | -2.575260 | 1.009453 | -1.548183 | -1.154107 | -0.071839 |
| 4 | -8.543242  | 22.754614 | -2.625635 | 0.947688 | -1.711178 | -1.624480 | 0.108450  |

```
[45]: len(whole_df_)
```

```
[45]: 455
```

# Notebook

December 19, 2023

## 1 File 44

```
[1]: import pubchempy as pcp
import pandas as pd
import warnings
warnings.filterwarnings("ignore")
```

```
[2]: df_search = pd.read_excel('../Data/
↳Proposed_structures_with_AI_colchicyne_tanimoto_similarity_.xlsx')
```

```
[3]: data_ = pd.DataFrame(data=df_search['AI_generated_SMILES'])
zeros = [0 for i in range(len(data_))]
data_['CID'] = zeros
data_['PUBCHEM_SMILES'] = zeros
data_.head()
```

```
[3]:
```

|   | AI_generated_SMILES                                            | CID | PUBCHEM_SMILES |
|---|----------------------------------------------------------------|-----|----------------|
| 0 | <chem>COC1=C2C3=CC=C(NC)C(=O)C=C3[C@H1](CCC2=CC(OC)=...</chem> | 0   | 0              |
| 1 | <chem>COC1=C2C3=CC=C(NC)C(=O)C=C3[C@H1](CCC2=CC(OC)=...</chem> | 0   | 0              |
| 2 | <chem>COC1=C2C3=CC=C(NC)C(=O)C=C3[C@H1](CCC2=CC(OC)=...</chem> | 0   | 0              |
| 3 | <chem>COC1=C2C3=CC=C(NC)C(=O)C=C3[C@H1](CCC2=CC(OC)=...</chem> | 0   | 0              |
| 4 | <chem>COC1=CC2=CC=C(NC)C(C=C2[C@H1](N3C=C(N=N3)CN)C...</chem>  | 0   | 0              |

```
[4]: len(data_)
```

```
[4]: 1356
```

```
[5]: known_1 = []
for i, smiles in enumerate(data_['AI_generated_SMILES']):
    try:
        compound = pcp.get_compounds(smiles, 'smiles')
        data_['CID'][i] = compound[0].cid
        data_['PUBCHEM_SMILES'][i] = compound[0].canonical_smiles
        if math.isnan(data_['CID'][i]):
            data_['CID'][i] = 0
            data_['PUBCHEM_SMILES'][i] = 0
        else:
            pass
```

```

        knownon_l.append(compound)
    except:
        print("PUGREST.BadRequest: error: ", smiles)

```

```

PUGREST.BadRequest: error:
COC1=C2C3=CC=C(NC)C(=O)C=C3[C@H1](CCC2=CC(OC)=C1OC)NCCONC
PUGREST.BadRequest: error:
COC1=C2C3=CC=C(NC)C(=O)C=C3[C@H1](CCC2=CC(OC)=C1OC)NCCCCC
PUGREST.BadRequest: error:
COC1=C2C3=CC=C(NC)C(=O)C=C3[C@H1](CCC2=CC(OC)=C1OC)NCCCCC
PUGREST.BadRequest: error:
COC1=C2C3=CC=C(NC)C(=O)C=C3[C@H1](CCC2=CC(OC)=C1OC)N4C=C(N=N4)CNCC
PUGREST.BadRequest: error:
COC1=CC2=CC=C(NC)C(C=C2[C@@H1](N3C=C(N=N3)CN)CCC1=CC(=COC)OC)=O
PUGREST.BadRequest: error:
C1=C2C(C3=C(OC)C(=C(C=C3CC4[C@@H1]2NCC4CCC)OC)OC)=CC=C(NC)C1=O
PUGREST.BadRequest: error:
C12=CC(C(NC)=CC=C1C=C(CC[C@@H1]2NCCC(F)(F)F)C=C(OC)C(OC)=COC)=O
PUGREST.BadRequest: error:
C1=C2C([C@H1](CCC3=CC(OC)=C(C(=C32)OC)OC)NCCCC1)(C(NC)=C1)O
PUGREST.BadRequest: error:
C=1=C2C([C@H1](CCC3=CC(OC)=C(C(=C32)OC)OC)NCCCC1)(C(NC)=CC=1)O
PUGREST.BadRequest: error:
C1=C2C([C@H1](CCC3=CC(OC)=C(C(=C32)OC)OC)NCCCC1)(C(=C1)NC)O
PUGREST.BadRequest: error: C12=CC(C(NC)=CC=C1C=C(CC[C@H1]2NCCC(F)F)F)OC=O
PUGREST.BadRequest: error: C12=NCCC1[C@H1]CNC32C4CC=CC=C3C4=CC
PUGREST.BadRequest: error:
O=CC1=CN=NN1[C@H1]2CCC3=CC(OC)=C(OC)C(OC)=C3C4=CC=C(C(=O)C=C42)NCC
PUGREST.BadRequest: error:
C1=NCCC1NC[C@H1]2C3=CC(C(SC)=CC=C3C4=C(OC)C(OC)=C(C=C4CC2)OC=O)NC(=O)C
PUGREST.BadRequest: error:
C1=NCC(F)=CC=C1CN[C@H1]2CCC3=CC(OC)=C(OC)C(OC)=C3C4=CC=C(C(=O)C=C24)SCC
PUGREST.BadRequest: error:
OC1=CC=C(C=C1)CN[C@H1]2CCC3=C(C(OC)=C(OC)C(OC)=C3)C4=CC=C(SC)C(=O)C=C24
PUGREST.BadRequest: error:
OC1=CC=C(C=C1)CN[C@H1]2CCC3=CC(OC)=C(OC)C(OC)=C3C4=CC=C(C(C=C42)=O)SCC
PUGREST.BadRequest: error:
O=CC1=C[C@H1](CCC=C2C(OC)=C(OC)C(OC(C)=O)=C2C1=CC=C(SC)C=O)CC=O
PUGREST.BadRequest: error:
OC1=CC=C(C=C1)CN[C@H1]2CCC3=CC(OC)=C(OC)C(OC)=C3C4=CC=C(SC)C(=O)C=C42
PUGREST.BadRequest: error:
OC1=CC=C(C=C1)CN[C@H1]2CCC3=C(C(OC)=C(OC)C(OC)=C3)C4=CC=C(SC)C(C=C24)=O
PUGREST.BadRequest: error:
OC1=CC=C(C=C1)CN[C@H1]2CCC3=C(C(OC)=C(OC)C(OC)=C3)C4=CC=C(SC)C(=O)C=C42
PUGREST.BadRequest: error:
OC1=CC=C(C=C1)CN[C@H1]2CCC3=CC(OC)=C(OC)C(OC)=C3C4=CC=C(SC)C(=O)C=C24
PUGREST.BadRequest: error:
O=CC1=C2[C@H1](CCC3=CC(OC)=C(OC)C(OC(=O)C)=C3C1=CC=C(SC)C2=O)CC=O

```

PUGREST.BadRequest: error:  
O=CC1=C2[C@H1](CCC3=CC(OC)=C(OC)C(=C3C2=CC=C(SC)C1=O)OCC4=CC=CC=C4)ONC

PUGREST.BadRequest: error:  
COC1=CC=C(C(OC)=C1OC)C2=CC=C(SC)C(C=C2[C@@H1]NC(N(COC)C)=C)=CNC=O

PUGREST.BadRequest: error:  
C1=CCC2[C@H1](N3C(C(OC)=O)=C(N=N3)C=CC(=O)C4NC)CC=CC=C4C2=C(OC)C(OC)=C1OCNC=O

PUGREST.BadRequest: error:  
C1OC2=CC=C(C(OC)=C2OC)C3=CC=C(SC)C1(C=C3[C@@H1](NC(N(CC)CC)=O)CC=C)NC=O

PUGREST.BadRequest: error:  
CC1=CC=C(SC)C(C=C1[C@@H1](NC(=O)C)CCC=CC(OC)=C(OC)C(OC=CCOC)=C)=O

PUGREST.BadRequest: error:  
C1C2=CC=C(SC)C(C=C2[C@@H1](NC(C)=O)CCC=CC(OC)=C(OC)C(OC(=O)C=C)C1)SC=O

PUGREST.BadRequest: error:  
CC1=C2C=C(SC)C(C=C1[C@@H1](NC(=O)C)CCC=CC(OC)=C(OC)C(OC=CCOC)=C2)=O

PUGREST.BadRequest: error:  
CCOC(OC1=C2CC([C@H1](CCC2=CC(OC)=C1OC)NC(C)=O)=CC(C(SC)=CC)=O)SC

PUGREST.BadRequest: error:  
CCOC(OC1=CC=CC2=C(OC)C(OC)=C(OC)C=C2CC[C@@H1](C=CC1=O)NC(C)=O)SSC=O

PUGREST.BadRequest: error:  
OC(NC(=O)OC)C=CC=C1C2=C(OC)C(OC)=C(OC)C=C2CC[C@@H1](C1=CC=O)NC(C)=O

PUGREST.BadRequest: error:  
O1C(OC(=O)OC)=CC=C2C([C@@H1](NC(C)=O)CCC3=CC(OC)=C(OC)C(OC)=C32)=CC1NC

PUGREST.BadRequest: error:  
OC(NCCOCOC1)[C@@H1]C2=CC(C(NC)=CC=C2C3=C(OC)C(OC)=C(OC)C=C3CC1)=O

PUGREST.BadRequest: error:  
C1[C@H1](CCC2=CC(OC)=C(OC)C(OC)=C2C1=CC=C(OC(OC)=O)C=O)CSCNC(=O)C

PUGREST.BadRequest: error:  
C=1=C2C(C3=C(OC)C(OC)=C(OC)C=C3CC[C@@H1]2NC(C)=O)C=C(OC(CC)=O)C(C=1)=O

PUGREST.BadRequest: error:  
N([C@H1]1CCC=C(C(OC)=C(OC)C(OC)=C1C2=CC=C(SC)CC=C2)OC3=CC)=NC=C3

PUGREST.BadRequest: error:  
OC(N1CCOC12)[C@@H1]C3=CC(C(NC)=CC=C3C4=C(OC)C(OC)=C(OC)C=C4CC2)=O

PUGREST.BadRequest: error:  
C1[C@H1](CCC2=CC(OC)=C(OC)C(OC)=C2C1=CC=C(SC)CC)ONC(C)=O

PUGREST.BadRequest: error:  
C1=2[C@H1](CCC3=CC(OC)=C(OC)C(OC)=C3C1=CC=C(SC)C(=O)C=2)NC(C)CC=CSC

PUGREST.BadRequest: error:  
C1[C@@H1](C2=CCC(SC)=CC=C2C3=C(OC)C(OC)=C(OC)C=C3C1)ONC(C)=O

PUGREST.BadRequest: error:  
N([C@H1]1CC2C=C(C(OC)=C(OC)C(OC)=C1C3=CC=C(SC)CC=C23)OC=CC)=NC=C

PUGREST.BadRequest: error:  
C1N(C(=S)N[C@@H1]2C3=CC(C(NC)=CC=C3C4=C(OC)C(OC)=C(OC)C=C4CC2)=O)C=C1

PUGREST.BadRequest: error:  
C=1=CC(C(C=C2[C@H1](CCC3=C(C(OC)=C(OC)C(OC)=C3)C2=1)SC(C)=O)C)=O

PUGREST.BadRequest: error:  
C1=CC=C(S1C)C2=CN(NC2)[C@H1]C3C4C5=CC(OC)=C(OC)C(OC)=C5C=CC=C(NC)C(=O)C=C34

PUGREST.BadRequest: error:  
OC=C(OC)C=C1C(C2=CC=C(SC)C(C=C2[C@H1](CC1)NC(C)=O)OCC(=O)OCS)C=O

PUGREST.BadRequest: error:  
C1=2[C@H1](CCC3=CC(OC)=C(OC)C(OC)=C3C1=CC=C(C(C=2)=O)SCNC(C)=O)C  
PUGREST.BadRequest: error:  
C1[C@H1](C2=CCC(SC)=CC=C2C3=C(OC)C(OC)=C(OC)C=C3C1=O)C=O  
PUGREST.BadRequest: error:  
C1=CC2=C(S1C)C(=O)C3=C[C@H1](CCC4=C(C(OC)=C(OC)C(OC)=C4)C23)NCSC  
PUGREST.BadRequest: error:  
C1[C@H1](CCC2=CC(OC)=C(OC)C(OC(=O)CC)=C2C1=CC=C(SC)C(=O)CNC)SC  
PUGREST.BadRequest: error:  
C1[C@@H1](C2=CC(C(SC)=CC=C2C3=C(OC)C(OC)=C(OC)C=C3CCNCC)=O)C1SC=O  
PUGREST.BadRequest: error:  
C[C@H1](CCC1=CC(OC)=C(OC)C(OC(OC)=O)=C1C2=CC=C(SC)C(=O)C=C2)NC  
PUGREST.BadRequest: error:  
C1[C@H1](CCC2=CC(OC)=C(OC)C(OC)=C2C3=CC=C(C(C=C3)=O)SCNCC)OC1  
PUGREST.BadRequest: error:  
C[C@H1]1CCC2=CC(OC)=C(OC)C(OC)=C2C3=CC=C(C(=O)C=C31)SCNC(C)=O  
PUGREST.BadRequest: error:  
C=CC=1C(=CCC(OC(C(C)C=2)=O)=CC=1OC(NCC=2)C)CC=C(OC3)C(OC)=CC(C)=C3NCNC  
PUGREST.BadRequest: error:  
C12=CC=3C(=CCC(OC(C(C)C)=O)=CC=3OC([C@@H1]N)C=C)C=CC=C1SC=CC(OC)=C2OC  
PUGREST.BadRequest: error:  
C1[C@H1](CCC2=CC(OC)=C(OC)C(OC(CC)=O)=C2C1=CC=C(SC)C(=O)CNC)SC  
PUGREST.BadRequest: error:  
C1=CC=2C(=CCC(OC(C3=CC=CC4=C3)=O)=CC=2O[C@H1]CCC1)NC=C(OC)C4OC  
PUGREST.BadRequest: error:  
COC1=C2C3=CC=C(NC)C(=O)C=C3[C@H1](CCC2=CC(OC)=C1OC)NCCC4=CC=CC=C4  
PUGREST.BadRequest: error:  
C1=C2CC[C@H1](C3=CCC(NC)=CC=C3C2=C(OC)C(=C1OC)OC)ONCCCCCCC  
PUGREST.BadRequest: error:  
COC1=C2C3=CC=C(NC)C(=O)C=C3[C@H1](CCC2=CC(OC)=C1OC)NC/C=C/C4=CC=CC=C4  
PUGREST.BadRequest: error:  
CSC=1C(C=C2C(=CC=1)C3=C(OC)C(=C(OC)C=C3CC[C@@H1]2NCC)OO)C=O  
PUGREST.BadRequest: error:  
CSC=1C(C=C2C(=CC=1)C3=C(OC)C(=C(OC)C=C3CC[C@@H1]2NCC)O)OC=O  
PUGREST.BadRequest: error:  
CSC=1C(C=C2C(=CC=1)C3=C(OC)C=CC=C3CC[C@@H1]2NCN)COCOC=O  
PUGREST.BadRequest: error: CSCCC=C1C(C2=C(C=C(OC)C(OC)=C2OC)CC[C@@H1]1N=O)CC=O  
PUGREST.BadRequest: error:  
CSC=1C(C=C2C(=CC=1)C3=C(OC)C(OC)=CC=C3CC[C@@H1]2NCC)=O  
PUGREST.BadRequest: error:  
CSC=1C(C=C2C(=CC=1)C3=C(OC)C(OC)=C(C=C3CC[C@@H1]2NCC)OO)C=O  
PUGREST.BadRequest: error:  
COC=CC=1CC[C@H1](NC(C)=O)C2=CC(=O)C(SC)=CC=C2C=1C(O)=COC  
PUGREST.BadRequest: error: C=1OC=CC2CC[C@H1](N)CCC3=CC(=C(OC)C=C3C2=CC=1OCS)C  
PUGREST.BadRequest: error: C1OC2=CCCC[C@H1](N)C3=CC(=O)C(SC)=CC=C3C2C(OC)=C1OC  
PUGREST.BadRequest: error:  
C1N2CC1(C=C3C(=O)C(NC)=CC=C3C=C(OC)C(OC)=C(OC)C=C)CC[C@@H1]2N=O  
PUGREST.BadRequest: error:

COC=C1CC=2C[C@H1](N)C3=CC(C(=CC=C3C=2C(OC)=C1O)CN)C=O  
 PUGREST.BadRequest: error: COC1=CC2CC[C@H1](N)C3=CC(=O)C(SC)=CC=C3C1C(OC)=C2OC  
 PUGREST.BadRequest: error:  
C=1SCC(C=C2C=1C3=C(CC[C@@H1]2NC(N)=O)C=C(OC)C(=C3OC)OC)SC=O  
 PUGREST.BadRequest: error:  
CSC=1C2(C=CC(=CC=1)C3=C(OC)C(OC)=CC=C3CC[C@@H1]2NOC)NC=O  
 PUGREST.BadRequest: error:  
CSC=1C(C2=CC(=CC=1)C3=C(OC)C(OC)=CC=C3CC[C@@H1]2NOC)NC=O  
 PUGREST.BadRequest: error:  
CC(=O)C(S1C2)CC(OC)=C(OC)C(O)=C2C=3C1=CC(C(SC)=CC=3)=O  
 PUGREST.BadRequest: error: CC(=O)C=C1C(C2=C(OC)C(OC)=C(OC)C=C2CC[C@@H1]1NCC)=O  
 PUGREST.BadRequest: error:  
CC(=O)N[C@H1]1CCC2=CC(OC)=C(OC)C(OC)=C2C=3C1=CC(=O)C(SC)=CC=3N  
 PUGREST.BadRequest: error:  
C1=2C(=O)C(=C3C=C1C4=C(CC[C@@H1]3NC(C)=O)C=C(OC)C(OC)=C4OC(OC)=O)C=2  
 PUGREST.BadRequest: error:  
C1C(=O)C(=C2C=C1C3=C(CC[C@@H1]2NC(C)=O)C=C(OC)C(OC)=C3OC(OC)=O)C  
 PUGREST.BadRequest: error:  
CC(=O)OC1=CC=C2C3=C(C(OC)=C(C=C3CC[C@@H1](C2=CC1=O)OC(=O)CO)CO)C  
 PUGREST.BadRequest: error:  
CC(=O)OC1=CC=C2C3=C(C(OC)=C(C=C3CC[C@@H1](C2=CC1=O)OC(=O)CO)CN)C(=O)COC  
 PUGREST.BadRequest: error:  
CC(=O)OC1=CC=C2C3=C(C(OC)=C(C=C3CC[C@@H1](C2=CC1=O)OC(=O)C)OC)NC(=O)C  
 PUGREST.BadRequest: error:  
CC(=O)OC1=CC=C2C3=C(C(OC)=C(C=C3CC[C@@H1](C2=CC1=O)OC(=O)C)OC)NC(=O)COC  
 PUGREST.BadRequest: error:  
CC(=O)OC1=CC=C2C3=C(C(OC)=C(C=C3CC[C@@H1](C2=CC1=O)OCNCC)O)OC  
 PUGREST.BadRequest: error:  
CC(=O)OC1=CC=C2C3=C(C(OC)=C(C=C3CC[C@@H1](C2=CC1=O)OC(=O)C)OC)OC  
 PUGREST.BadRequest: error:  
CCC(=O)OC1=CC=C2C=C(C3C[C@H1](NC(=O)C)C2=CC1=O)C=C(OC)C(=C3OC)OC(=O)OC  
 PUGREST.BadRequest: error:  
CCC(=O)OC1=CC=C2C3=C(C(OC)=C(C=C3CC[C@@H1](C2=CC1=O)OC(=O)C)NC)C=O  
 PUGREST.BadRequest: error:  
CC(C)C(=O)OC1=C2CC([C@@H1](NC(=O)C)CCC2=CC(=C1OC)OC)=CC(C(SC)=CC)=O  
 PUGREST.BadRequest: error:  
CC(C)C(=O)OC1=C2C3=CC=C(C(C=C3[C@H1](CCC2=CC(OC)=C1OC)NC=O)C)OOC  
 PUGREST.BadRequest: error:  
CC(C)C(OC1=CC=C2C3=C(CC[C@@H1](C2=CC1=O)NC(C)=O)C=C(OC)C(OC)=C3OC)(O)C  
 PUGREST.BadRequest: error:  
CC(C1)C(=O)OC=CC2=CC([C@@H1](NC(C)=O)CCC3=CC(=C(OC)C(O)=C3C2)O)OC=CC1=O  
 PUGREST.BadRequest: error:  
CC(=O)N[C@H1]1C2=CC(C(SC)=CC=C2C3=C(OC)C(=C(OC)C=C3CC1)OC(=O)C4=CC=CC=C4)=O  
 PUGREST.BadRequest: error:  
CC(=O)N[C@H1]1C2=CC(C(SC)=CC=C2C3=C(C(OC)=C(OC)C=C3CC1)OC(=O)C4=CC=CC=C4O  
 PUGREST.BadRequest: error:  
O=C(OC)OC1=CC=C2C3=C(C(OC)=C(C=C3CC[C@@H1](C2=CC1=O)NC(=O)C)OC)OC(=O)C  
 PUGREST.BadRequest: error:

O=C(OC1)OC=C2C3=CC=C(C(C=C3[C@H1](CCC2=CC(=C1OC)OC)NCC)=O)OOC(=O)C  
 PUGREST.BadRequest: error:  
O=C(OC)OC1=CC=C2C3=C(C(OC)=C(C=C3CC[C@@H1](C2=CC1=O)OC(=O)C)NC)C=O  
 PUGREST.BadRequest: error:  
O=C(OC1)OC=C2C3=CC=C(C(C=C3[C@H1](CCC2=CC(=C1OC)OC)NCC)=O)OOC  
 PUGREST.BadRequest: error:  
O=C(OC)OCC(C=C1C(C2=C(C=C(OC)C(OC)=C2OC)CC[C@@H1]1NC(=O)C)=C)=O  
 PUGREST.BadRequest: error:  
O=C(OC)OC1=C2C3=CC=C(C(C=C3[C@H1](CCC2=CC(OC)=C1OC)NC=O)C)OOC  
 PUGREST.BadRequest: error:  
O=C(C)N[C@@H1]1C=2C(C3=C(C(=C(OC)C=C3CC1)OC)OC)C=C(OC)C(C=2)=O  
 PUGREST.BadRequest: error:  
O=C(O1)C=C(C(OC)=CC=2CC[C@@H1](C3=CC(=O)C(SC)=CC=C3C1=2)NC(C)=O)COC  
 PUGREST.BadRequest: error:  
O=C(C)N[C@@H1]1CC(C2=C(C(=C(OC)C=C2CC1)OC)OC)C=C(OC)C(OC=C)O  
 PUGREST.BadRequest: error:  
O=C(C)N[C@H1]1CCC2=CC(=C(OC)C(=C2C=3C1=CC(C(SC)=CC=3)=O)OC(=O)CC)COC  
 PUGREST.BadRequest: error:  
O=C(C)N[C@H1]1CCC2=CC(=C(OC)C(=C2C=3C1=CC(C(=CC=3)OC)CC)OOCOC)C=O  
 PUGREST.BadRequest: error:  
C1C(=O)C=C(C2=CC=C(SC)C(C=C2[C@H1](NC(C)=O)C)C)OC(OC)=C1O  
 PUGREST.BadRequest: error:  
CC(=O)OC=C1C2=CC=C(SC)C(=O)C=C2[C@H1](CCC1=C(OC)C(OC)=C)OC(=O)OC  
 PUGREST.BadRequest: error:  
CC(=O)OC=C1C2=CC=C(SC)C(=O)C=C2[C@H1](CCC1=C(OC)C(OC)=C)OCNC(=O)C  
 PUGREST.BadRequest: error: C1=2C=CCC[C@H1](NC(=O)C)C1=CC(C(=CC=2)SC)=O  
 PUGREST.BadRequest: error:  
C1=2C=C(CC[C@H1](NC(=O)C)C1=CC(C(=CC=2)SC)=O)C(OC)C(=COC)OC  
 PUGREST.BadRequest: error:  
C12C=C(CC[C@H1](NC(=O)C)C1=CC(C(=CC)SC)=O)C(OC)C(OC)=C2OC  
 PUGREST.BadRequest: error:  
C123C=C(CC[C@H1](NC(=O)C)C1=CC(C(SC)=C2)=O)C(C(=C3OC)OC)OC  
 PUGREST.BadRequest: error:  
C12C=C(CC[C@H1](NC(=O)C)C1=CC(C(=CC)SC)=O)C(OC)C(=C2OC)OC(=O)C  
 PUGREST.BadRequest: error:  
C1=2C=C(CC[C@H1](NC(=O)C)C1=CC(C(=CC=2)SC)=O)C(OC)C(OC)=COC(=O)C  
 PUGREST.BadRequest: error:  
CC(=O)OCC1=CN(N=N1)[C@H1]2CCC3=CC(OC)=C(OC)C(OC)=C3C=4C2=CC(=O)C(NC)=CC=4C  
 PUGREST.BadRequest: error:  
CC(=O)OCC1=CN(N=N1)[C@H1]2CCC3=CC(OC)=C(OC)C(=C3C=4C2=CC(C(NC)=CC=4)=O)OC  
 PUGREST.BadRequest: error:  
O=C(OC1)OC=CC=C2C3=C(OC)C(=C(OC)C=C3CC[C@H1](NC(=O)C)C2=CC1)OOC  
 PUGREST.BadRequest: error:  
O=C(OC1)OC=CC=C2C3=C(OC)C(=C(OC)C=C3CC[C@@H1](NC(C)=O)C2=CC1)OOC  
 PUGREST.BadRequest: error:  
O=C(NC)NCC=CN(COCC)C1C(C2=C(OC)C=C(OC)C=C2CC[C@@H1]1NC=O)C=O  
 PUGREST.BadRequest: error:  
O=C(C)N[C@H1]CC1C2=CC(OC)=C(C(OC)=C2C3=CC=C(SC)C(=O)C=C13)OOC



PUGREST.BadRequest: error:  
O=C(NC)N1CC=CC=C2C([C@H1](CCC3=CC(OC)=C(C(OC)=C32)OC)NC=O)C=C1O  
PUGREST.BadRequest: error:  
O=C(CC)OC1=C2CC([C@@H1](NC(C)=O)CCC2=CC(OC)=C1OC)=CC(C(=CC)SC)=O  
PUGREST.BadRequest: error:  
O=C(C)N[C@H1]1CCC2=CC(OC)=C(C(OC)=C2CC1=CC(C(OC(CC)=O)=CC)=O)OCNC  
PUGREST.BadRequest: error:  
O=C(NC)NCC=CN(COC1C)CC(C2=C(OC)C(=C(OC)C=C2CC[C@@H1]1)NC(=O)C)OC=O  
PUGREST.BadRequest: error:  
O=C(C)N[C@H1]1CCC2=CC(OC)=C(C(OC)=C2CC1=CC(C(OC(CC)=O)=CC)=O)OC  
PUGREST.BadRequest: error:  
O=C(C)N[C@H1]CC1C2=CC(OC)=C(C(OC)=C2C3=CC=C(SC)C(=O)C=C13)OCC  
PUGREST.BadRequest: error:  
O=C(C)N[C@H1]1CCC2=CC(OC)=C(C(OC)=C2C=CC=C(OC(C)=O)C(C=C1)=O)OC  
PUGREST.BadRequest: error:  
CC(=O)N[C@@H1]C1=C2C(C(NC)=CC=C1C3=C(OC)C(OC)=C(OC)C=C3CC2)NC=O  
PUGREST.BadRequest: error:  
CC(=O)N[C@@H1]1C2=CC(C(NC)=CC=C2C3=C(OC)C(OC)=C(OC)C=C3C1)=O  
PUGREST.BadRequest: error:  
CC(=O)N[C@@H1]C1=CC(C(NC)=CC=C1C2=C(OC)C(OC)=C(OC)C=C2CC)N=O  
PUGREST.BadRequest: error:  
CC(=O)N[C@@H1]C1=C2C(C(NC)=CC=C1C3=C(OC)C(OC)=C(OC)C=C3CC2)N=O  
PUGREST.BadRequest: error:  
CC(=O)N[C@@H1]1C2=CC(C(NC)=CC=C2C3=C(OC)C(OC)=C(OC)C=C3C1)NC=O  
PUGREST.BadRequest: error:  
CC(=O)N[C@@H1]C1=C2C(C(NC)=CC=C1C3=C(OC)C(OC)=C(OC)C=C3CC2)=O  
PUGREST.BadRequest: error:  
CC(=O)N1[C@@H1]C2=CC(C(NC)=CC=C2C3=C(OC)C(OC)=C(OC)C=C3CC1)N=O  
PUGREST.BadRequest: error:  
C1OC=CC2C([C@@H1](N)CCC1=CCOC(=O)OCC=C)(OC)C(=C2)OCSC  
PUGREST.BadRequest: error: COC=C1C2=CC=C(NC)C(=O)C=C2[C@H1](CCC1C=COC)NC(=O)CNC  
PUGREST.BadRequest: error: C1OC=C2C=3C([C@H1](CCC2=C1)N=CCC(=CC=3)SC)=O  
PUGREST.BadRequest: error: COC=C1C2=CC=C(NC)C(=O)C=C2[C@H1](CCC1C=COC)NC(=O)NNC  
PUGREST.BadRequest: error: COC=C1C2=CC=C(NC)C(=O)C=C2[C@H1](CCC1C=COC)NC(=O)NC  
PUGREST.BadRequest: error: COC=C1C2=CC=C(NC)C(=O)C=C2[C@H1](CCC1C=COC)NC(=O)N  
PUGREST.BadRequest: error:  
COC=CC=C(C1=C2C=C(NC)CC=C1[C@H1](C)N=[N+1])[N-1]CC(OC)=C2OC  
PUGREST.BadRequest: error:  
COC1=C2C3=CC=C(NC)C(=O)C=C3[C@@H1](NCCC)CCC2=CC(=C1OC)NC  
PUGREST.BadRequest: error:  
C=1OC=CC2=C(C3=C(OC)C(OC)=CC=C3CC[C@@H1]2N=[N+1]=[N-1])NC=CC=1  
PUGREST.BadRequest: error:  
COC1=C2C3=CC=C(NC)C(=O)C=C3[C@H1](CCC2=CC(OC)=C1OC)NN=NC=C  
PUGREST.BadRequest: error:  
COC=CC1=C(C2=CC=C(NC)CC=C2[C@H1](C)N=[N+1])[N-1]CC(OC)=C1OC  
PUGREST.BadRequest: error:  
COC1=C2C3=CC=C(NC)C(=O)C=C3[C@@H1](NCCC)CCC2=CC(=C1OC)OSC  
PUGREST.BadRequest: error:

COC=C1C2=CC=C(NC)C(=O)C=C2[C@@H1](N3N=NC=C3)CCC1=CC(=COC)OC  
PUGREST.BadRequest: error:  
COC1=C2C3=CC=C(NC)C(=O)C=C3[C@H1](CCC2=CC(=C1OC)OC)NCCCS  
PUGREST.BadRequest: error:  
COC1=CC=C(C2=CC=C(NC)CC=C2[C@H1](C)N=[N+1])[N-1]CC(OC)=C1OC  
PUGREST.BadRequest: error:  
C=C1C([C@H1](CCC2=CC(=C(OC)C(=C21)OC)OC)NC=CNCOC(C)C)=O  
PUGREST.BadRequest: error:  
C12=CC(C(SC)=CC=C1C3=C(C=C(C(OC)=C3OC)OC)CC[C@@H1]2NCC(C)CN)C=O  
PUGREST.BadRequest: error:  
COC=C(OC)C(OC)=C1CCC[C@H1](N2C=CN=N2)C3=CC(=O)C(=CC=C3C1)NC  
PUGREST.BadRequest: error:  
COC=C(OC)C(OC)=CC=1CC[C@H1](NC(=N)N)C2=CC(=O)C(=CC=C2C=1)CNC  
PUGREST.BadRequest: error:  
COC1=C(OC)C(OC)=CC=2CC[C@H1](NC(=N)N)C3=CC(=O)C(=CC=C3C1=2)CNC  
PUGREST.BadRequest: error:  
CNC(NCCCC)=S[C@@H1]C1=CC(=O)C(NC)=CC=C1C2=C(C=C(OC)C(=C2OC)OC)CCF  
PUGREST.BadRequest: error:  
C12=CC(C(NC)=CC=C1C3=C(C=C(C(OC)=C3OC)OC)CC[C@@H1]2NCCCCCCCCCCC)CSC=O  
PUGREST.BadRequest: error:  
CN(C(=S)N[C@@H1]1C2=CC(=O)C(NC)=CC=C2C3=C(C=C(OC)C(OC)=C3OC)CC1C)C#N  
PUGREST.BadRequest: error:  
C1=C2C(C3=C(C=C(OC)C(=C3OC)OC)CC[C@@H1]2NCCCCCCCCCCCC=C)C=C(SC)C1=O  
PUGREST.BadRequest: error:  
C12=CC3(C(NC)=CC=C1C4=C(C=C(C(OC)=C4OC)OC)CC[C@@H1]2NCCCCCCCCCCC)C=C3  
PUGREST.BadRequest: error:  
C12=CC(C(NC)=CC=C1C3=C(C=C(C(OC)=C3OC)OC)CC[C@@H1]2N4C=C(N=N4)CCC)C=CNC=O  
PUGREST.BadRequest: error:  
C=C1C([C@H1](CCC2=CC(=C(OC)C(=C21)OC)OC)NCCCCC)CC=CC(C(SC)=C)=O  
PUGREST.BadRequest: error:  
C=C1C(C2=C(C=C(OC)C(=C2OC)OC)CC[C@@H1]1NC/C=C/C3=CC=CC=C3CC)=C(SC)C=O  
PUGREST.BadRequest: error:  
C12=CCC(NC)=CC=C1C3=C(C=C(C(OC)=C3OC)OC)CC[C@@H1]2NCCCCCCCCCCC=O  
PUGREST.BadRequest: error:  
CNC(C(C)C)N[C@@H1]1C=2C(C3=C(C=C(OC)C(OC)=C3OC)CC1)=CC=C(C(=O)C=2)NC  
PUGREST.BadRequest: error:  
C=C1C([C@H1](C2CC3=CC(=C(OC)C(=C31)OC)OC)NCCCCC)CCC=CC(C(=C2)SC)=O  
PUGREST.BadRequest: error:  
COC1=C(OC)C(OC)=CC=2CC[C@@H1](C3=CC(=O)C(NC)=CC=C3C=21)N4C=C(N=N4)CON  
PUGREST.BadRequest: error:  
C12=CC(C(NC)=CC=C1C3=C(C=C(C(OC)=C3OC)OC)CC[C@@H1]2NCCCCCCCCCCC=O)SC  
PUGREST.BadRequest: error:  
C12=CCC(NC)=CC=C1C3=C(C=C(C(OC)=C3OC)OC)CC[C@@H1]2NCCC4CCCCC4=O  
PUGREST.BadRequest: error:  
COC1=C(OC)C(OC)=CC=2CC[C@@H1](C3=CC(=O)C(NC)=CC=C3C=21)NCCC4CCCCC4  
PUGREST.BadRequest: error:  
C12=CC(C(NC)=CC=C1C3=C(C=C(C(OC)=C3OC)OC)CC[C@@H1]2NCCC4=CC=CC=C4C)SC  
PUGREST.BadRequest: error:

COC1=C(OC)C(OC)=CC=2CC[C@@H1](C3=CC(=O)C(NC)=CC=C3C=21)NCCC4=CC=CC=C4  
 PUGREST.BadRequest: error:  
CNC(C(C)O)N[C@@H1]1CC(C2=C(C=C(OC)C(OC)=C2OC)CC1)=CC=C(C(=O)C)NC  
 PUGREST.BadRequest: error:  
C12=CC(C(NC)=CC=C1C3=C(C=C(C(OC)=C3OC)OC)CC[C@@H1]2NCCC4=CC=CC=C4C)NC=O  
 PUGREST.BadRequest: error:  
C12=CCC(NC)=CC=C1C3=C(C=C(C(OC)=C3OC)OC)CC[C@@H1]2NCCC4=CC=CC=C4C  
 PUGREST.BadRequest: error:  
C=C1C2([C@@H1](NCCCCCCCCC)CCC3=CC=C(OC)C(=C31)OC)OC=CC(C(=C2)NC)=O  
 PUGREST.BadRequest: error:  
C=C1C([C@H1](CCC2=CC(=C(OC)C(=C21)OC)OC)NCCCCC)=CC(C(SC)=C)=O  
 PUGREST.BadRequest: error:  
C1=C2C([C@H1](CCC3=CC(=C(OC)C(=C32)OC)OC)NCCCCC)C=CC(C(=C1)SC)=O  
 PUGREST.BadRequest: error:  
CC(C)(C)C(OC1=CC=CC2=C(OC)C(OC)=C(OC)C=C2CC[C@H1](NC(=O)C)C1=CC=O)=O  
 PUGREST.BadRequest: error:  
CC(C)C(=O)OCCC=C1[C@H1](CCC2=CC(OC)=C(OC)C(OC)=C2C1=CCN)SC=O  
 PUGREST.BadRequest: error:  
C=1C(C)(C)C(OC2=CC=CC3=C(OC)C(OC)=C(OC)C=C3CC[C@H1](NC(=O)C)C2=CC=1O)SC  
 PUGREST.BadRequest: error:  
CC(C)(C)COC1=CC=C2C3=C(OC)C(OC)=C(OC)C=C3CC[C@@H1](C2=CC1=O)SC=O  
 PUGREST.BadRequest: error:  
O=C(C=CNCC(=O)OCCN[C@H1]1)CCC2=C(C(OC)=C(OC)C(OC)=C2)C3=CC=C(NC)C(=O)C=C13  
 PUGREST.BadRequest: error:  
C1=2[C@H1]CCC3=CC(OC)=C(OC)C(OC(CC)=O)=C3C1=CC=C(C(C=2)=O)SCNC(=O)CSC  
 PUGREST.BadRequest: error:  
OC(CCC(C)C)OCC1=CN(N=N1)[C@H1]2CCC3=CC(OC)=C(OC)C(OC)=C3C4=CC=C(NC)C(=O)C=C24  
 PUGREST.BadRequest: error:  
O=CCN(CC=C)N(OC)O[C@H1]1CCC2=CC(OC)=C(OC)C(OC)=C2C=CC=C(NC)C(=O)C=C1  
 PUGREST.BadRequest: error:  
N([C@@H1]1C=2CC3=C(C(OC)=C(OC)C=C3CC1)OC=CC=C(NC)CC=2)=O  
 PUGREST.BadRequest: error:  
OC(CCC(C)C)OCC1=CN(N=N1)[C@H1]CCC2=CC(OC)=C(OC)C(OC)=C2C=CC=C(C(C)N)C  
 PUGREST.BadRequest: error:  
C=C1C(C2=C(C=C(OC)C(=C2OC)OC)CC[C@@H1]1N3C=C(N=N3)C4=CC=CC=C4)=CC=C(NC)C=O  
 PUGREST.BadRequest: error:  
C=C1C([C@H1](CCC2=CC(=C(OC)C(=C21)OC)OC)NCCCCCCCCC)C=CC(CNC)=O  
 PUGREST.BadRequest: error:  
C=C1C(C2=CC=C(C(=O)C=C2[C@H1](CC1)N3C=C(N=N3)C=CC=CC=N)C=C)OCNC(OC)=O  
 PUGREST.BadRequest: error:  
OC1=C(C=CC=C1)C=2N=NN(C=2)[C@H1]3CCC4=CC(OC)=C(OC)C(OC)=C4C5=CC=C(NC)C(=O)C=C35  
 PUGREST.BadRequest: error:  
NC(=C(N=NCC(=O)CCC=C1N=CC(C(OC(C)=O)=CC=C1C2=C(OC)C)(OC)COC)C)C2CCOF  
 PUGREST.BadRequest: error:  
N1=CC=C(C2=C1)COC3=CC=C4C5=C(OC)C(OC)=C(OC)C=C5CC[C@@H1](C4=CC3=O)N2  
 PUGREST.BadRequest: error:  
NC1=CN(N=N1)[C@H1]2CCC3=C(C(OC)=C(OC)C(OC)=C3)C4=CC=C(NC)C(C=C24)=O  
 PUGREST.BadRequest: error:

NC1=C(N=NC1C(=O)CCC=CC=C2C3=C(C(OC)C(OC)=C(OC)C=C3CC[C@H1](CC2N)CN)C=O  
 PUGREST.BadRequest: error:  
C[C@@H1](C1=CCC(SC)=CC=C1C2=C(C(OC)C(OC)=C(C=C2CC)OCOC=CCSC=O)O  
 PUGREST.BadRequest: error:  
N=C=C(N=NC(C(C)OC)[C@H1]CCC1=CC(OC)=C(OC)C(OC)=C1C2=CC=C(NC)C=O)C=C2  
 PUGREST.BadRequest: error:  
C=C1C(C2=C(C(=C(OC)C=C2CC[C@@H1]1N3C=C(N=N3)C4=CC)CC)N4O)COC=CC=C(CON)C  
 PUGREST.BadRequest: error:  
C=C1C(C2=CC=CC(=O)C=C2[C@@H1](N3C=C(N=N3)C4=CC=CC=N4)CC1)NC=C(OC)C(OC)SCOC  
 PUGREST.BadRequest: error:  
C1=C2C(C3=C(C=C(OC)C=C3CC[C@@H1]2N4C=C(N=N4)C=CC)OCOC)OC=CC=C(C1=O)C  
 PUGREST.BadRequest: error:  
C=C1C([C@H1](CCC2=CC(=C(OC)C(=C21)OC)OC)NCCCCCCCCCCC)C=CCC(NC)=O  
 PUGREST.BadRequest: error:  
C=1=C2C(C3=C(C=C(OC)C=C3CC[C@@H1]2N4C=C(N=N4)C=CC)OCOC)OC=CC=CC=1O  
 PUGREST.BadRequest: error:  
C1=C2C(C3=CC=CC(=O)C=C3[C@H1](CC2)N4C=C(N=N4)C=CC=CC=N(OC)C(OC)=C1OCNC  
 PUGREST.BadRequest: error:  
C=C1C2(C3=C(C=C(OC)C=C3CC[C@@H1]1N4C=C(N=N4)C=CC)OCOC)OC=CC=C(NC)C2=O  
 PUGREST.BadRequest: error:  
C1=C2C(C3=C(C=C(OC)C=C3CC[C@@H1]2N4C=C(N=N4)C=CC)OCOC)OC=CC=C(C1=O)NC  
 PUGREST.BadRequest: error:  
C=C1C(C2=C(C=C(OC)C=C2CC[C@@H1]1N3C=C(N=N3)CCC)COCO)C=CC=C(NC)C=O  
 PUGREST.BadRequest: error:  
C=C1C(C2=CC=C(C(=O)C=C2[C@@H1](N3C=C(N=N3)C4=NC=CC=C4)CC1)NC)=C(OC)C(OC)=COC  
 PUGREST.BadRequest: error:  
C1=C2C(C3=CC=C(C(C=C3[C@H1](CC2)N4C=C(N=N4)C5=NC=CC=C5O)N)C=C)(C(=C1OC)OC)OC  
 PUGREST.BadRequest: error: C12=CC([C@@H1]1NCC3=CC=C(C)C=C3CCCC)C(SC)=CC2O  
 PUGREST.BadRequest: error:  
O=C(OC)CN(CCO)N[C@H1]1CCC2=CC(OC)=C(OC)C(OC)=C2C3=CC=C(NC)C(=O)C=C13  
 PUGREST.BadRequest: error:  
O=C(O)C=C(OC)CC=C1C(C2=C(OC)C(OC)=C(OC)C=C2C=3C[C@@H1]1N=CC=3S)C  
 PUGREST.BadRequest: error:  
O=C(O)C=C(OC)CC=C1C(C2=C(OC)C(OC)=C(OC)C=C2C=3C[C@@H1]1N=CC=3SC)=O  
 PUGREST.BadRequest: error:  
O=C(C)N[C@@H1]1CC(C2=C(C(OC)=C(OC)C=C2CC1)OC(CC)=O)=CC=C(SC)C(=O)C  
 PUGREST.BadRequest: error:  
O=C(O)C=C(OC)CC=C1C(C2=C(OC)C(OC)=C(OC)C=C2C=3C[C@@H1]1N=CC=3S)C=O  
 PUGREST.BadRequest: error:  
O=C(C)N[C@@H1]1C2=CCC(SC)=CC=C2C3=C(C(OC)=C(OC)C=C3CC1)OCOO  
 PUGREST.BadRequest: error:  
O=C(C1)N[C@@H1]2CC(C3=C(C(OC)=C(OC)C=C3CC2)OC(CC)=O)=CC=C(SC)C1=O  
 PUGREST.BadRequest: error:  
O=C(C)N[C@@H1]1C2=CCC(SC)=CC=C2C3=C(C(OC)=C(OC)C=C3CC1)OC=O  
 PUGREST.BadRequest: error: OC(OC(C)CC)CC(NCC1=CN(N=N1)[C@H1]C2CC3=CC(OC)=C(OC)C(OC)=C3C4=CC=CC(=O)C=C24)NC=O  
 PUGREST.BadRequest: error:  
O=CC(OOC1=C)C=CC=C1OC(=O)N[C@H1]2CCC3=CC(OC)=C(OC)C(OC)=C3C4=CC=C(NC)C(=O)C=C24

PUGREST.BadRequest: error:  
OC(OC(C)CC)CC=10CCC=C2[C@H1](CCC3=C(C(OC)=C(OC)C(OC)=C3)C2=CC=1)NSC=0  
PUGREST.BadRequest: error: 0=C(C1=C(C(OC)=0)N(N=N1)[C@H1]C2=C3C(C(NC)=CC=C2C4=C(C(OC)=C(OC)C=C4CC3)OC)=0)0  
PUGREST.BadRequest: error:  
C1[C@@H1](C2=CC(C(NC)=CC=C2C3=C(OC)C(OC)=C(C=C3C1)O)C)ONC(C(=O)O)=CNC  
PUGREST.BadRequest: error:  
C1=2[C@H1](CCC3=CC(OC)=C(OC)C(OC)=C3C1=CC=C(C(=O)C=2)NCO)C(C(OC)=O)NC(=O)CNC  
PUGREST.BadRequest: error:  
C1[C@@H1](C2=CC(C(NC)=CC=C2C3=C(OC)C(OC)=C(C=C3C1)O)C)NC(C(O)=O)=CC(=O)ONC=O  
PUGREST.BadRequest: error:  
C1[C@@H1](C2=CC(C(SC)=CC=C2C3=C(OC)C(OC)=C(C=C3C1)O)C)NC(C(O)=O)=C(COCC)OOSC=O  
PUGREST.BadRequest: error:  
CN([C@H1]1CC2=CC(OC)=C(OC)C(OC)=C2C=C3C=C)NC(=O)C=C13  
PUGREST.BadRequest: error:  
C=12N(N=NC=1C(OC3=CC=C(C=C3)F)=O)C(OC)=C(OC)C(OC)=CC4=CC=C(C(=O)C=C24)NC  
PUGREST.BadRequest: error:  
C1=CC1(C=CN(COC(OC)=O)N=NN)[C@H1]C2CC3=CC(OC)=C(OC)C(OC)=C3C=CC=C(NC)C(=O)C=C2  
PUGREST.BadRequest: error:  
O=C(C1=C(C(OC)=0)N(N=N1)[C@@H1]C2=C3CC(NC)=CC=C2C4=C(C(OC)=C(OC)C=C4CC3)OC)OO  
PUGREST.BadRequest: error:  
C=1N(N=NC=1C(=O)OCC2=CC=C(C=C2)F)CC(OC)=C(OC)C(OC)=CC3=CC=C(NC)C(=O)C=C3  
PUGREST.BadRequest: error:  
O=CC1=C(C(OC)=0)N(N=N1)[C@@H1]C2=C3C(C(NC)=CC=C2C4=C(C(OC)=C(OC)C=C4CC3)OC)=O  
PUGREST.BadRequest: error:  
C1[C@@H1](C2=CC3(C(SC)=CC=C2C4=C(OC)C(OC)=C(C=C4C1)O)C)NC(C(O)=O)=C(C3)ONC  
PUGREST.BadRequest: error: N([C@@H1]1CCC2=CC(OC)=C(OC)C=C2CC1)=CC=C(C=C)NC  
PUGREST.BadRequest: error:  
O=C(C(C1)C1)NC(=O)N[C@H1]1CCC2=C(C(OC)=C(OC)C(OC)=C2)C3=CC=C(NC)C(=O)C=C13  
PUGREST.BadRequest: error:  
O=C(C(C1)C1)NCC1=CN(N=N1)[C@H1]2CCC3=CC(OC)=C(OC)C(OC)=C3C4=CC=C(C(=O)C=C42)NCCO  
PUGREST.BadRequest: error: 0=C(C(C1)C1)NC(=O)N[C@H1]1CCC2=C(C(OC)=C(OC)C(OC)=C2)C3=CC=C(C(C=C31)=O)NCC(=O)OC  
PUGREST.BadRequest: error:  
O=C(C(C1)C1)NC(=O)N[C@H1]1CCC2=C(C(OC)=C(OC)C(OC)=C2)C3=CC=C(NC)C(=O)C=C31  
PUGREST.BadRequest: error:  
O=C(O)C=C(C(OC)=0)N=NN[C@H1]1CCC2=CC(OC)=C(OC)C(OC)=C2C3=CC=C(NC)C(=O)C=C13  
PUGREST.BadRequest: error:  
O=C(O)C1=C(C(OC)=0)N=NN1[C@H1]2CCC3=CC(OC)=C(OC)C(OC)=C3C4=CC=C(NC)C(=O)C=C24  
PUGREST.BadRequest: error:  
O=C(C)N[C@@H1]C1=C2C(C(SC)=CC=C1C3=C(C(OC)=C(OC)C=C3CC2)OC(C(C)C)=O)C=O  
PUGREST.BadRequest: error:  
O=C(OC)C1=CN(N=N1)[C@H1]2CCC3=CC(OC)=C(OC)C(=C3C4=CC=C(NC)C(C=C42)=O)OCC  
PUGREST.BadRequest: error:  
O=C(C)N[C@@H1]C1=C2C(C(SC)=CC=C1C3=C(C(OC)=C(OC)C=C3CC2)OC(C4=CC=CC=C4)=O)SC=O  
PUGREST.BadRequest: error:  
O=C(C(C)C)OC=1C(C=C2[C@H1](CCC3=CC(OC)=C(OC)C(OC)=C3C2=CC=1N)C(C)=O)SC=O  
PUGREST.BadRequest: error:

O=C(O)C1=CN(N=N1)[C@H1]2CCC3=C(C(OC)=C(OC)C(OC)=C3)C4=CC=C(C(=O)C=C42)NCC  
 PUGREST.BadRequest: error:  
O=C(O)C1=C(C(OC)=O)N=NN1[C@H1]CCC2=CC(OC)=C(OC)C(OC)=C2C3=CC=C(C(C=C3)=O)NC  
 PUGREST.BadRequest: error:  
O=C(C(C)C)OCC(C=C1[C@H1](CCC2=CC(OC)=C(OC)C(O)=C2C1=CC=O)C(C)=O)C=O  
 PUGREST.BadRequest: error:  
O=C(C(C)C)OC=1C(C=C2[C@H1](CCC3=CC(OC)=C(OC)C(OC)=C3C2=CC=1S)C(C)=O)OC  
 PUGREST.BadRequest: error:  
O=C(O)C=C(OC)C(C(NC)=CC=C1C2=C(OC)C(OC)=C(OC)C=C2CC[C@H1](C1)NCC)=O  
 PUGREST.BadRequest: error:  
O=C(O)C1=CN(N=N1)[C@H1]2CCC3=C(C(OC)=C(OC)C(OC)=C3)C4=CC=C(C(C=C42)=O)NCC  
 PUGREST.BadRequest: error: CCCCCCCCCCCCCCCC(OC1=CN(N=N1)[C@H1]C2CC3=CC(OC)=C(O  
C)C(OC)=C3C4=CC=C(C(=O)C=C24)NC)=O  
 PUGREST.BadRequest: error:  
CCCCCCCCCCCCCCCC=10CCC=C2[C@H1](CCC3=C(C(OC)=C(OC)C(OC)=C3)C2=CC=1)NSC=O  
 PUGREST.BadRequest: error:  
OC(=O)C1=C(C(OC)=O)N=NN1[C@H1]CCC2=CC(OC)=C(OC)C(OC)=C2C3=CC=C(NC)C(C=C3)=O  
 PUGREST.BadRequest: error:  
C[C@H1](NCC)CC1=CCC(NC)=CC=C1C2=C(C=C(OC)C(OC)=C2OCC3=CC=CC=C3)OSC  
 PUGREST.BadRequest: error: C1[C@H1](OC1)O[C@@H1]([C@H1]O)COOCNC2(N=NC(=C2)C=CC3  
=C(C=CC4=C3)C1)CC(OC)=C(OC)C=C4CCNC=O  
 PUGREST.BadRequest: error:  
OC(=O)C1=C(C(OC)=O)N(N=N1)[C@H1]C2CC3=CC(OC)=C(OC)C(OC)=C3C4=CC=C(NC)C(=O)C=C42  
 PUGREST.BadRequest: error:  
C1[C@H1](OCCC)CC2=CC(C(NC)=CC=C2C3=C(C(OC)=C(OC)C=C3CC1)OC(OC)=O)NC=O  
 PUGREST.BadRequest: error:  
C1=C(OC)C=C(OC)C=C1CC[C@H1](C=CC(C(OC(C2=CC=CC=C2)=O)=CC=CC)=O)C  
 PUGREST.BadRequest: error: N(C)C(=O)NCCC(OC1=CN(N=N1)[C@H1]CCC2=CC(OC)=C(OC)C(  
OC)=C2C3=CC=C(C(=O)C=C3)N)C=O  
 PUGREST.BadRequest: error:  
C1[C@H1](OC1)OCOC(=S)N[C@H1]C2CC=C3C(OC)=C(OC)C(OC)C=C3C=4C2=CC(=O)C(=CC=4)NCC=C  
 PUGREST.BadRequest: error:  
C1[C@H1](NCC)C2C=CC(OC)=C(OC)C=C2CC[C@H1]C3=CCC(OC(OC)=O)=CC=C31  
 PUGREST.BadRequest: error:  
C12=C(OC)C=C(OC)C=C1CC[C@H1](NC(C(O)=O)(C)C2=CC=C(NC)C)CON=COC  
 PUGREST.BadRequest: error:  
N(C)CNCC1=CN(N=N1)[C@H1]2CCC3=CC(OC)=C(OC)C(OC)=C3C4=CC=C(C(C=C24)=O)NC=O  
 PUGREST.BadRequest: error:  
OC(=O)C=C(C(OC)=O)N(NCCC)N[C@H1]1CCC2=CC(OC)=C(OC)C(OC)=C2C3=CC=C(NC)C(=O)C=C31  
 PUGREST.BadRequest: error:  
C[C@H1](NCC)CC1=CC(C(NC)=CC=C1C2=C(C=C(OC)C(OC)=C2OCC3=CC=CC=C3)OSCC)=O  
 PUGREST.BadRequest: error: C1[C@H1](OC1)OOC(O)(C)CN=CN([C@@H1]2C3=CC(C(SC)=CC=C  
3C4=C(OC)C(OC)=C(C=C4CC2)O)O)C=O  
 PUGREST.BadRequest: error:  
C12=C(OC)C=C(OC)C=C1CC[C@H1](NC(C(O)=O)(C)C2=CC=C(NC)C)COCNCOC  
 PUGREST.BadRequest: error: C=1C(C)(C)OC(=O)/N=C(/N[C@H1]2CCC3=C(C(OC)=C(OC)C(OC  
)=C3)C4=CC=C(NC)C(=O)C=C24)N=1  
 PUGREST.BadRequest: error: C=1C(C)(C)OC(=O)/N=C(/N[C@H1]2CCC3=C(C(OC)=C(OC)C(OC

)=C3)C4=CC=C(C(C=C42)=O)NC)N=1  
 PUGREST.BadRequest: error:  
 N1=NN1[C@@H1]2C3=CC(C(NC)=CC=C3C4=C(C(OC)=C(OC)C=C4CC2)OC)=O  
 PUGREST.BadRequest: error:  
 CNCC1C=CC=C(C=C1)NC(=O)N[C@@H1]2C3=CC(C(NC)=CC=C3C4=C(OC)C(OC)=C(C=C4CC2)OC)=O  
 PUGREST.BadRequest: error:  
 CNC=CC=C1C[C@H1](CCC2=CC(OC)=C(OC)C(=C21)OC)N3C(C(O)=O)=C(N=N3)C(=O)OOSC  
 PUGREST.BadRequest: error:  
 CNC=1CC=C2[C@H1](CCC3=C(C(OC)=C(OC)C(=C3)OC)C2=CC=1)NC(C(=O)O)=CC=CNC=O  
 PUGREST.BadRequest: error:  
 CNC=1CC2=C3[C@H1](CCC4=C(C(OC)=C(OC)C(=C4)OC)C3=C5C=1)NC(C(=O)O)=C5ON2  
 PUGREST.BadRequest: error:  
 N=NN([C@H1]1CCC2=C(C(OC)=C(OC)C(OC)=C2)C3=CC=C(C(=O)C=C13)NC)C00CCOC=O  
 PUGREST.BadRequest: error:  
 CNCC1C=C2[C@H1](CCC3=C(C(OC)=C(OC)C(=C3)OC)C2=CC=C1)NCOC(C4=CC=NC=C4)=O  
 PUGREST.BadRequest: error:  
 O=CC=CC=CC(NCC1=CN(N=N1)[C@H1]2CCC3=CC(OC)=C(OC)C(OC)=C3C4=CC=C(C(C=C24)=O)NC)=O  
 PUGREST.BadRequest: error:  
 O=CC=CC=CC(NCC1=CN(N=N1)[C@H1]2CCC3=CC(OC)=C(OC)C(OC)=C3C4=CC=C(NC)C(=O)C=C24)O  
 PUGREST.BadRequest: error:  
 CNC=1CC=C2[C@H1](CCC3=C(C(OC)=C(OC)C(OC)=C3)C2=CC=1)NC(C(=O)O)=CC=CNC=O  
 PUGREST.BadRequest: error:  
 N=NN([C@H1]1CCC2=C(C(OC)=C(OC)C(OC)=C2)C3=CC=C(C(=O)C=C13)NC)C0CC=C0C0CC  
 PUGREST.BadRequest: error:  
 C12=C3C(C=4C([C@@H1](NCC5=CC=C(C)C=C5CCC1)C2)=CC(=O)C(=CC=4)SC=C)(OC)C(=C3OC)OC  
 PUGREST.BadRequest: error:  
 C1=C2C(C3=C(CC[C@@H1]2N4N=NC(=C4)C5(O)CCCCC5)C=C(C(OC)=C3OC)OC=C)C=C(C1=O)O  
 PUGREST.BadRequest: error:  
 C1=C2C(C=C(CC[C@@H1]2N3C=C(N=N3)C0CC4=CC=CC=C4)C=C(C(=COC)OC)OC)=CC=C(NC)C1=O  
 PUGREST.BadRequest: error: C1=C2C(C3=CC=C(C(=O)C=C3[C@H1](CC2)N4C=C(N=N4)COC(=O)  
 )C5=CC=NC=C5)COC)C(OC)=C1OCNC=O  
 PUGREST.BadRequest: error:  
 C12=C3C(CC([C@@H1](NCC4=CC=C(C)C=C4CCC1)C2)=CC(=O)C(=CC)SC=C)(OC)C(=C3OC)OC  
 PUGREST.BadRequest: error:  
 C1=C2C(CC([C@@H1]1NCCCCCCCCCCCCCCC)C(=CC2)SC=COC)C(OC)=COC  
 PUGREST.BadRequest: error:  
 CN(N([C@@H1]1C2=CC(=O)C(NC)=CC=C2C3=CC(=C(OC)C=C3CC1)OC)O)CNC(=S)CCCCC  
 PUGREST.BadRequest: error:  
 C=C1C(C=C(CC[C@@H1]1N2N=NC(=C2)C3=CC=C(C1)C=C3)C=C(C(OC)=COC)OC)=CC=C(C(=O)NC  
 PUGREST.BadRequest: error:  
 CC(C)C(=O)OCC1=CN(N=N1)[C@H1]2CCC3=CC(OC)=C(OC)C(OC)=C3C4=CC=C(NC)C(=O)C=C24  
 PUGREST.BadRequest: error:  
 CC(C)C=1OCCC=C2[C@H1](CCC3=C(C(OC)=C(OC)C(OC)=C3)C2=CC=1)NSC=O  
 PUGREST.BadRequest: error:  
 CC(C)(O)C1N=NN(CN1CC[C@H1]2CC)C3=CC(OC)=C(OC)C(OC)=C3C4=CC=C(C(C=C24)=O)NC  
 PUGREST.BadRequest: error:  
 N(C(C1=CC=NC=C12)=O)[C@@H1]3CC(C4=C(C(OC)=C(OC)C=C4CC3)OC(OC)=O)=CC=C(SC)C2=O  
 PUGREST.BadRequest: error:

N(C(C1=CC=NC=C1)=O) [C@H1] 2C=3C(C4=C(C(OC)=C(OC)C=C4CC2)OC)=CC=C(SC)C(=O)C=3  
 PUGREST.BadRequest: error:  
 C12=C(C(=C(OC)C(OC)=C1)O)CC3=CC=C(NC)CC=C3 [C@H1] (CC2)NC(C)=O  
 PUGREST.BadRequest: error:  
 N1(CCCC1)CN[C@H1] 2CCC3=C(C(OC)=C(OC)C(OC)=C3)C4=CC=C(SC)C(=O)C=C24  
 PUGREST.BadRequest: error:  
 C1 [C@H1] (NC(O)=O)C2=CCC=CC=C2C3=C(OC)C(OC)=C(OC)C=C3CC=C1SC=O  
 PUGREST.BadRequest: error:  
 N1(CCCC1)C(=O)OC2=C(OC)C(OC3)=CC=C2C4=CC=C(SC)C(C=C4 [C@H1] (NC(=O)C)CC3)=O  
 PUGREST.BadRequest: error:  
 C=CC(=O)OCCC=C1 [C@H1] (CCC2=C(C(OC)=C(OC)C(OC)=C2)C1=CC)N=O  
 PUGREST.BadRequest: error:  
 N(C(C1=CC=NC=C1)=O) [C@H1] 2C=3C(C4=C(C(OC)=C(OC)C=C4CC2)OC=C)C=C(SC)C(=O)C=3  
 PUGREST.BadRequest: error:  
 C12=CC(OC)=C(OC)CCC([C@H1] (CCCC=C1OC)NC(C)=O) (OC(=O)OC)C2=O  
 PUGREST.BadRequest: error:  
 C1 [C@H1] (NC(O)=O)C=CCC(SC)=CCC=C(C2=C(OC)C(OC)=C(OC)C=C2CC1)SC=O  
 PUGREST.BadRequest: error: C12=C(C(OC)=C(OC)CCC([C@H1] 2CCC(C)C1N=C)=O)OSC  
 PUGREST.BadRequest: error:  
 C=CC(OC)=C(OC)CC1=CC=C(NC)CC=C1 [C@H1] (NC(N(CCO)CCO)=S)CCCNC=O  
 PUGREST.BadRequest: error:  
 CNC=1C(=O)C=C2 [C@H1] (CCC3=CC(OC)=C(OC)C(OC)=C3C2=CC=1)NC4(C(=O)O)C=CN=N4  
 PUGREST.BadRequest: error:  
 CNC=1C(=O)C=C2 [C@H1] (CCC3=CC(OC)=C(OC)C(OC)=C3C2=CC=1N)C4(C(=O)O)C=CN=N4  
 PUGREST.BadRequest: error:  
 N1=CC=CC2=C1C(OC=CC(OC=3)=CCCC[C@H1] (NC(C)=O)C4=CCC(SC)=CC=C4C=32)C  
 PUGREST.BadRequest: error:  
 N=1N(C=C(CNC(C(C)C)=O)N=1) [C@H1] CCC2=C3C(OC)=C(OC)C(OC)=C2C=CC=C(CC=CC=C3)CC  
 PUGREST.BadRequest: error:  
 NN(C=C(CNC(C1CCCC1)=O)N=N) [C@H1] CCC2=CC(OC)=C(OC)C(OC)=C2C3=CC=C(C(=O)C=C13)NC  
 PUGREST.BadRequest: error:  
 C=C1 [C@H1] (CCC2=C(C(OC)=C(OC)C(OC)=C2)C1=CC=CC(C)=O)NCNC(C)=O  
 PUGREST.BadRequest: error:  
 N=1N(C=C(CNC(C(C)C)=O)N=1) [C@H1] CCC2=CC(OC)=C(OC)C(OC)=C2C=CC3=CCC=CC=C3NC=O  
 PUGREST.BadRequest: error:  
 C=C1 [C@H1] (CCC2=CC(OC)=C(OC)C(OC)=C2C1=CC=C(C(=O)C)NC)NC(C(=O)O)=CN=CNC  
 PUGREST.BadRequest: error: CC(C)(C)OC(=O)NCCC(NCC=1N=NN(C=1) [C@H1] C2CC3=CC(OC)=  
 C(OC)C(OC)=C3C4=CC=C(C(=O)C=C24)N)C=O  
 PUGREST.BadRequest: error:  
 C1C(C)(C)OC/N=C(/N [C@H1] 2CCC3=CC(OC)=C(OC)C(=C3C4=CC=C(NC)C(C=C42)=O)OC)N=N1  
 PUGREST.BadRequest: error: CC(C)(C)OCNCCC(=O)NCC1=CN(N=N1) [C@H1] 2CCC3=CC(OC)=C(  
 OC)C(OC)=C3C4=CC=C(C(C=C24)=O)NC=O  
 PUGREST.BadRequest: error:  
 C1C(C)(C)OC/N=C(/N [C@H1] 2CCC3=CC(OC)=C(OC)C(=C3C4=CC=C(NC)C(C=C42)=O)OC)N1C  
 PUGREST.BadRequest: error: CC(C)(C)OC(=O)NCCC(OC=1N=NN(C=1) [C@H1] C2CC3=CC(OC)=  
 C(OC)C(OC)=C3C4=CC=C(C(=O)C=C24)NC)=O  
 PUGREST.BadRequest: error: CC(C)(C)OC(=O)NCCC(NCC=1N=NN(C=1) [C@H1] 2CCC3=CC(OC)=  
 C(OC)C(OC)=C3C4=CC=C(C(C=C24)=O)N)C=O



PUGREST.BadRequest: error:  
CNCCC1=CC=C(C=C1)NC(=O)N[C@H1]2CCC3=CC(OC)=C(OC)C(OC)=C3C4=CC=C(C(C=C24)=O)NC=O  
 PUGREST.BadRequest: error:  
N=NN([C@@H1]1C=2C(C3=C(C(OC)=C(OC)C=C3CC1)OC)=CC=C(NC)CC=2)OC(0)=0  
 PUGREST.BadRequest: error:  
N1=NN[C@@H1]2CCC3=C(C(OC)=C(OC)C=C3CC2=CC(OC)=C(OC)COC)CN1  
 PUGREST.BadRequest: error:  
O=CC=CC=CC(NCC1=CN(N=N1)[C@H1]C2CC3=CC(OC)=C(OC)C(OC)=C3C4=CC=C(C(=O)C=C24)NC)=O  
 PUGREST.BadRequest: error: CNCC(C1=CC=C(C=C1)NC(=O)N[C@@H1]2C3=CC(C(NC)=CC=C3C4=C(C(OC)=C(OC)C=C4CC2)OC)=O)OC  
 PUGREST.BadRequest: error:  
CNCC1C=C2[C@H1](CCC3=C(C(OC)=C(OC)C(=C3)OC)C2=CC=C1)NCOC(C4=CC=CC=C4)=O  
 PUGREST.BadRequest: error:  
N=NN([C@H1]1CCC2=C(C(OC)=C(OC)C(=C2)OC)C3=CC=C(NC)C(C=C13)=O)COC4CC=CC=C4O  
 PUGREST.BadRequest: error:  
C1=C2C(C3=CC=C(CC=C3[C@@H1](N4C=C(N=N4)CNC(=O)C(C1)C1)C1)ONC=C)(C(=C2OC)OC)OC  
 PUGREST.BadRequest: error:  
C12=C3C(CC([C@@H1](NCC4=CC=C(C)C=C4CCC1)C2)NN=NC=C(NC)C=O)=C=C(C(=C3)OC)OCOC  
 PUGREST.BadRequest: error:  
C=C1C(C=C(CC[C@@H1]1N2N=NC(=C2)CNC(=O)OCCC)CC=C(C(OC)=COC)O)C=CC=C(C=O)NC  
 PUGREST.BadRequest: error:  
C=C1C(C=C(CC[C@@H1]1N2C=C(N=N2)CNC(=O)C3=CC=NC=C3)C=CC(OC)=COC)OC=CC=C(C=O)NC  
 PUGREST.BadRequest: error:  
O(C=CC=CC1=C(OC)C(OC)=C(OC)C=C1CC[C@H1](C=CCCOC2=CC=CC=C2)OCC)ONC  
 PUGREST.BadRequest: error:  
O(C=CC=CC1=C(OC)C(OC)=C(OC)C=C1CC[C@H1](C=CCCOC2=CC=CC=C2)OSC=O)NC  
 PUGREST.BadRequest: error:  
O=C(OC)OCC1=CN(N=N1)[C@H1]2CCC3=CC(OC)=C(OC)C(OC)=C3C4=CC=C(NC)C(=O)C=C24  
 PUGREST.BadRequest: error:  
O(C=CC=CC1=C(OC)C(OC)=C(OC)C=C1C2C[C@H1](C=CCC(OCC(C)C)=O)N=C2ON)C  
 PUGREST.BadRequest: error:  
O=C(C(C)C)NC(=S)N[C@@H1]1C=2C(C3=C(C(OC)=C(OC)C=C3CC1)OC)=CC=C(NC)C(=O)C=2  
 PUGREST.BadRequest: error:  
O=C(OCC)OCC=1N=NN(C=1)[C@H1]2CCC3=CC(OC)=C(OC)C(OC)=C3C4=CC=C(NC)C(=O)C=C24  
 PUGREST.BadRequest: error:  
O=C(OCC)CN(CCO)C(=S)N[C@H1]1CCC2=CC(OC)=C(OC)C(OC)=C2C3=CC=C(NC)C(=O)C=C13  
 PUGREST.BadRequest: error:  
CC(C)CNCC1=CN(N=N1)[C@H1]2CCC3=CC(OC)=C(OC)C(OC)=C3C4=CC=C(C(C=C24)=O)NC=O  
 PUGREST.BadRequest: error:  
CC(C)CNCC1=CN(N=N1)[C@H1]2CCC3=CC(OC)=C(OC)C(OC)=C3C4=CC=C(NC)C(=O)C=C24  
 PUGREST.BadRequest: error:  
C(=CN(C(=O)OCC)N[C@@H1]1CC=2)(C3=C(C(OC)=C(OC)C=C3CC1)OC)CC=C(NC)C(C=2)=O  
 PUGREST.BadRequest: error:  
COCNCC1=CN(N=N1)[C@H1]2CCC3=CC(OC)=C(OC)C(OC)=C3C4=CC=C(C(C=C42)=O)NC=O  
 PUGREST.BadRequest: error:  
C(=NC=C(NC)CC(=O)N)CC1=CN(N=N1)[C@H1]CCC2=CC(OC)=C(OC)C(OC)=C2C=CC=C(C)CNC=O  
 PUGREST.BadRequest: error:  
C(=C1N(C(=O)OCC)N12)CCC3=C(C(OC)=C(OC)C(OC)=C3)C4=CC=C(NC)C(C=C24)=O

PUGREST.BadRequest: error:  
N(C(C)C)C(NCC1=CN(N=N1)[C@H1]2CCC3=CC(OC)=C(OC)C(OC)=C3C4=CC=C(NC)C(=O)C=C24)=O  
PUGREST.BadRequest: error:  
N(C)C1=CC=C2C3=C(OC)C(OC)=C(OC)C=C3CC[C@@H1](C2=CC1=O)NC(C(=O)O)CCON=CCF  
PUGREST.BadRequest: error:  
N(C(C(C)C)=O)C1=CN(N=N1)[C@H1]2CCC3=C(C(OC)=C(OC)C(OC)=C3)C4=CC=C(NC)C(=O)C=C24  
PUGREST.BadRequest: error:  
N(CCCCCC=O)CC1=CN(N=N1)[C@H1]2CCC3=CC(OC)=C(OC)C(OC)=C3C4=CC=C(NC)C(=O)C=C24  
PUGREST.BadRequest: error: C1=C(C=CC(C1)=C1)COC(=O)CN[C@@H1]2C=3C(C4=C(C(OC)=C(OC)C=C4CC2)OC)=CC=C(SC)C(=O)C=3  
PUGREST.BadRequest: error:  
N(C)C1=CC=C2C3=C(OC)C(OC)=C(OC)C=C3CC[C@@H1](C2=CC1=O)NC(C(=O)O)CCONC(=O)C=C  
PUGREST.BadRequest: error:  
N(C)C1=CC=C2C3=C(OC)C(OC)=C(OC)C=C3CC[C@@H1](C2=CC1=O)NC(C(=O)O)CCONC(=O)CNC  
PUGREST.BadRequest: error:  
N(C(C)C)CC(=O)OCC1=C2N(N=N1)[C@H1]CCC3=CC(OC)=C(OC)C(OC)=C3C4=CC=C(NC)C(C=C24)=O  
PUGREST.BadRequest: error:  
C[C@H1](C1OC=CN[C@@H1]2C=C(C3=CC(OC)=C(OC)C(OC)=C3C1)CC=C(NC)CC2)ONCC  
PUGREST.BadRequest: error: C1=C2CC[C@H1](C3=CC(C(SC)=CC=C3C2C=C1O)CNC=O)CN=O  
PUGREST.BadRequest: error:  
COC=C1C2=CC=C(NC)C(=O)C=C2[C@@H1](NCC(C)C)CCC1=CC(OC)=COC  
PUGREST.BadRequest: error:  
C1=C2CC[C@H1](C3=CCC(SC)=CC=C3C2=C(C(OC)=C1OC)OC=O)[N-1]  
PUGREST.BadRequest: error:  
C=C1C=2C[C@H1](CC(C3=CC(OC)=C(OC)C=C31)C=CC=CSC)C(=O)C=2N  
PUGREST.BadRequest: error:  
COC=C1C2=CC=C(NC)C(=O)C=C2[C@@H1](NCCC)CCC1=CC(OC)=COC  
PUGREST.BadRequest: error:  
C1OC=C2C3=CC=C(NC)C(=O)C=C3[C@H1](CCC2C=COC)NCCCCCOC=C1  
PUGREST.BadRequest: error:  
C1=C2CC[C@H1](C3=CCC(NC)=CC=C3C2=C(C(OC)=C1OC)OC)ONCCC#N  
PUGREST.BadRequest: error:  
CC(CC)N[C@@H1]1C2=CC(C(SC)=CC=C2C3=C(OC)C(OC)=C(C=C3CC1)OC)=O  
PUGREST.BadRequest: error:  
CC(CC)N[C@@H1]C1=C2C(C(NC)=CC=C1C3=C(OC)C(OC)=C(OC)C=C3CC2)=O  
PUGREST.BadRequest: error:  
CC(CC)N[C@@H1]1C2=CC(C(SC)=CC=C2C3=C(CC1)C=C(OC)C(OC)=C3OC)=O  
PUGREST.BadRequest: error:  
C1=C2CC[C@H1](C3=CCC(SC)=CC=C3C2=C(C(OC)=C1OC)OC=O)N=[N+1]=[N-1]  
PUGREST.BadRequest: error:  
COC1=C2C3=CC=C(NC)C(=O)C=C3[C@H1](CCC2=CC(OC)=C1OC)NCC4=CC=NS4C  
PUGREST.BadRequest: error:  
N(CCCC)C(CN1[C@@H1]C2=CCC(O)=CC=C2C3=C(CC1)C=C(OC)C(OC)=C3OC)=O  
PUGREST.BadRequest: error:  
C1[C@H1](NCC)CC2=CC(C(NC)=CC=C2C3=C(OC)C(OC)=C(OC)C=C3C1N)C=O  
PUGREST.BadRequest: error:  
N(C)C=1C(=O)C=C2[C@H1](CCC3=CC(OC)=C(OC)C(OC)=C3C2=CC=1N)C(C)CCSC  
PUGREST.BadRequest: error:

C1=C(OC)C(OC)=C(OC=2)CC3=CC=C(SC)C1(C=C3[C@@H1](NC(N(C)C)=O)CCC=2)O  
PUGREST.BadRequest: error:  
N(C(C)=O)[C@@H1]C1=CC(C(NC)=CC=C1C2=C(OC)C(OC)=C(OC)C=C2CCNC=O)C  
PUGREST.BadRequest: error:  
C[C@H1](OCCC)[N-1]C1=CC(C(NC)=CC=C1C2=C(C(OC)=C(OC)C=C2C)OC)NC(=O)C  
PUGREST.BadRequest: error:  
C1=C(OC)C(OC)=C(OC)CC2=CC=C(SC)C1(C=C2[C@@H1](NC(N(C)C)=O)CCC)O  
PUGREST.BadRequest: error:  
N1=NN([C@@H1]C2=CC(C(O)=CC=C2C3=C(CC)C=C(OC)C(OC)=C3OC)=O)CC=C1F  
PUGREST.BadRequest: error:  
CNC=1C(C=C2[C@H1](CCC3=C(C(OC)=C(OC)C(OC)=C3)C2=CC=1)NC(C)C=O)SC  
PUGREST.BadRequest: error:  
CNC=1C(C=C2[C@H1](CCC3=C(C(OC)=C(OC)C(OC)=C3)C2=CC=1)NC(C)C)=O  
PUGREST.BadRequest: error:  
CNC=1C(C=C2[C@H1](CCC3=C(C(OC)=C(OC)C(OC)=C3)C2=CC=1)NC(C)C)CSCSC=O  
PUGREST.BadRequest: error:  
CNC=1C(C=C2[C@H1](CCC3=C(C(OC)=C(OC)C(OC)=C3)C2=CC=1)NC(C)C=O)SCSC  
PUGREST.BadRequest: error:  
C=1NC=2C(C=C3[C@H1](CCC4=C(C(OC)=C(OC)C(OC)=C4)C3=CC=2)NC(C)C)N=CN=1  
PUGREST.BadRequest: error:  
NN([C@H1]1CCC2=CC(OC)=C(OC)C(OC)=C2C3=CC=C(NC)C(=O)C=C13)C=O  
PUGREST.BadRequest: error:  
CNC=1C(C=C2[C@H1](CCC3=C(C(OC)=C(OC)C(OC)=C3)C2=CC=1)NC(C)C)C=O  
PUGREST.BadRequest: error:  
N1=NC(=CN(NC1)C=CC2(CC[C@H1](N)C3=CC(C(NC)=CC=C32)=O)CCOC)COC=C  
PUGREST.BadRequest: error:  
N1=NC(=C2N(NC1)C=CC3=CC4=C(OC)C(OC)=CC=C4CC[C@H1](NC(N)=O)C3=C2)OC=O  
PUGREST.BadRequest: error:  
N1=NC(=CN(N=N1)[C@H1]2CCC3=CC(OC)=C(OC)C(OC)=C3C4=CC=C(C(C=C42)=O)N)C  
PUGREST.BadRequest: error:  
OCCN(CC=C)C(=O)N[C@@H1]1C2=CC(C(NC)=CC=C2C3=C(OC)C(OC)=C(OC)C=C3CC1)=O  
PUGREST.BadRequest: error:  
N1=NC=CN(NC1)C=CC=C2C3=C(OC)C(OC)=C(OC)C=C3CC[C@@H1](C2=C)NC=CC=C  
PUGREST.BadRequest: error:  
N1=NC=CN(N=N1)[C@H1]2CCC3=CC(OC)=C(OC)C(OC)=C3C4=CC=C(NC)C(=O)C=C24  
PUGREST.BadRequest: error:  
N1=NC=CN(NC1)[C@H1]2CCC3=CC(OC)=C(OC)C(OC)=C3C4=CC=C(NC)C(=O)C=C24  
PUGREST.BadRequest: error:  
N1=NC(=CN(NC12)C=CC3=C(O)C(OC)=C(OC)C=C3CC[C@H1](N)C4=CCC(NC)=CC=C24)OC  
PUGREST.BadRequest: error:  
N1=NC(=CN(NC1)C=CC2=C(O)C(OC)=C(OC)C=C2CC3[C@H1](N)C=CCC(NC)=CC=C3)OC  
PUGREST.BadRequest: error:  
OCCN(CC=C)C(=S)N[C@H1]1CCC2=CC(OC)=C(OC)C(OC)=C2C3=CC=C(NC)C(=O)C=C13  
PUGREST.BadRequest: error:  
CNC(N(C)C)CN[C@H1]1CCC2=CC(OC)=C(C(OC)=C2C=3C1=CC(=O)C(=CC=3)NC)OC  
PUGREST.BadRequest: error:  
C1=C2C([C@H1](CCC3=CC(OC)=C(C(=C32)OC)OC)NCCC=CC)(C(SC)=C1)O  
PUGREST.BadRequest: error:

C=C1C([C@H1])(CCC2=CC(OC)=C(C(OC)=C12)OC)NCC=CC=O)C(=CC)NC  
 PUGREST.BadRequest: error:  
C12=CC(C(SC)=CC=C1C3=C(CC[C@@H1]2NCC4=CC=NC=C4)C=C(OC)C(OC)=C3O)C=O  
 PUGREST.BadRequest: error:  
C12=CC(C(NC)=CC=C1C3=C(OC)C(=C(C=C3CC[C@@H1]2N4CC=CC=C4)O)CO)C=O  
 PUGREST.BadRequest: error:  
C12=CC(C(NC)=CC=C1C3=C(OC)C3=C(CCC[C@@H1]2NCC=CC)CS)OC=O  
 PUGREST.BadRequest: error:  
COC1=C(OC)C(OC)=CCCC[C@H1](NCC2=CC=CS2)C3=CC(=O)C(NC)=CC=C3C1  
 PUGREST.BadRequest: error:  
C12=CC(C(SC)=CC=C1C3=C(OC)C(=C(C=C3CC[C@@H1]2N4CC=CC=C4)O)CO)C=O  
 PUGREST.BadRequest: error:  
COC=C(OC)C(OC)=C1CCC[C@H1](NCC(C)C)C2=CC(=O)C(SC)=CC=C2C1  
 PUGREST.BadRequest: error:  
NC(N(CC)OC)N[C@H1]1CCC2=CC(OC)=C(OC)C(OC)=C2C=3C1=CC(=O)C(=CC=3)NC  
 PUGREST.BadRequest: error:  
N1C(C(CCC)=C)N1[C@H1]2CCC3=CC(OC)=C(OC)C(OC)=C3C4=CC=C(C(=O)C=C24)NC  
 PUGREST.BadRequest: error:  
C12=CC=C(NC)C2C=C1[C@@H1](NC(C)=O)CCC=CC(OC)=C(OC)C(OC)=C  
 PUGREST.BadRequest: error:  
NC(CCN=N[C@H1]1CCC2=CC(OC)=C(OC)C(OC)=C2C3=CC=CC(=O)C=C13)NCC  
 PUGREST.BadRequest: error:  
C1=2[C@H1](CCC3=CC(OC)=C(OC)C(OC)=C3C1=CC=C(NC)C(=O)C=2NC)C=O  
 PUGREST.BadRequest: error:  
C=C1C2=C(OC)C(OC)=C(OC)C=C2CC[C@H1](NC(C=3)=O)C1=CC=C(C(C=3)=O)SC  
 PUGREST.BadRequest: error:  
C=C1C2=C(OC)C(OC)=C(OC)C=C2CC[C@H1](NC(N)=O)C1=CC=C(NC)C(=O)C  
 PUGREST.BadRequest: error: C1[C@H1](CC(C2=CC(OC)=C(OC)C=C21)C=CC=C(NC)CC)ON  
 PUGREST.BadRequest: error:  
C12=CC3=C(OC)C(OC)=C(OC)C=C3CC[C@H1](NC(N)=O)C=C1C=C(OC)C(=C2)OO  
 PUGREST.BadRequest: error:  
C=C1C2=C(OC)C(OC)=C(OC)C=C2CC[C@H1](NC(C)=O)C1=CC=C(C(C)=O)SC  
 PUGREST.BadRequest: error:  
C1[C@@H1](C2=CC(C(NC)=CC=C2C3=C(OC)C(OC)=C(OC)C=C3C1=O)N)C(=O)C  
 PUGREST.BadRequest: error:  
C1=2[C@H1](CCC3=CC(OC)=C(OC)C(OC)=C3C1=CC=C(C(C=2)=O)SCNC)C=O  
 PUGREST.BadRequest: error:  
C1=2[C@H1](CCC3=CC(OC)=C(OC)C(OC)=C3C1=CC=C(SC)C(=O)C=2NC)C  
 PUGREST.BadRequest: error:  
C1=2[C@H1](CCC3=CC(OC)=C(OC)C(OC)=C3C1=CC=C(C(C=2)=O)SCN)C(=O)C  
 PUGREST.BadRequest: error:  
NC(=O)N[C@@H1]C1=C2C(C(NC)=CC=C1C3=C(OC)C(OC)=C(OC)C=C3CC2)=O  
 PUGREST.BadRequest: error:  
CC(C)NC(=O)N1[C@@H1]C2=CC(C(NC)=CC=C2C3=C(OC)C(OC)=C(OC)C=C3CC1)=O  
 PUGREST.BadRequest: error:  
CC(N)(CCO)[C@H1]1CCC2=CC(OC)=C(OC)C(OC)=C2C3=CC=C(SC)C(=O)C=C13  
 PUGREST.BadRequest: error:  
CC(N)(CCO)[C@H1]1CCC2=CC(OC)=C(OC)C(OC)=C2C3=CC=C(C(C=C31)=O)NCC

PUGREST.BadRequest: error:  
C1#CC(C=C2[C@H1](CCC3=CC(OC)=C(OC)C(OC)=C3C2=C1N)C(C)=O)=C  
PUGREST.BadRequest: error:  
C1[C@H1](NC(C)=O)C2=CC(C(NC)=CC=C2C3=C(OC)C(OC)=C(C=C3C1)OCNC)=O  
PUGREST.BadRequest: error:  
C12=C(C2C=C3[C@H1](CCC4=CC(OC)=C(OC)C(OC)=C4C3=C1N)C(C)=O)OSC  
PUGREST.BadRequest: error:  
C1[C@H1](NC(C)=O)C2=CC(C(SC)=CC=C2C3=C(OC)C(OC)=C(C=C3C1)OCNC)=O  
PUGREST.BadRequest: error:  
C12=C(C(C=C3[C@H1](CCC4=CC(OC)=C(OC)C(OC)=C4C3=C1N)CC)=O)C2=O  
PUGREST.BadRequest: error:  
N1(CC2=CC=CN=C23)C=CC(C4=CN(OC)C=C3CC[C@H1](C4)C=C)CC(OC)=COC=C1  
PUGREST.BadRequest: error:  
C1[C@H1](NC(C)=O)C2=CCC(NC)=CC=C2C3=C(OC)C(OC)=C(OC)C=C3C1=O  
PUGREST.BadRequest: error:  
C=C(N[C@H1]1CCC2=C(C(OC)=C(OC)C(OC)=C2)C3=CC=C(SC)C(C=C31)=O)C  
PUGREST.BadRequest: error:  
C=12C=C(NC=3)CC4=CC=1CC=C2[C@H1](CCC=3C=C(OC)C(OC)=C4O)CNC(=O)CSCSC=O  
PUGREST.BadRequest: error:  
C1[C@H1](NC(C)=O)C2=CCC(SC)=CC=C2C3=C(OC)C(OC)=C(OC)C=C3C1NC=O  
PUGREST.BadRequest: error:  
C=1C=C(NC)CC=C2C=1C3=C(OC)C(OC)=C(OC)C=C3CC[C@@H1]2NC(C)=O  
PUGREST.BadRequest: error:  
C=12C=C(NC=3)CC4=CC=1CC=C2[C@H1](CCC=3C=C(OC)C(OC)=C4O)CNC=O  
PUGREST.BadRequest: error:  
CC(C)N(C(C)C)C(=O)N[C@@H1]C1=CC(C(NC)=CC=C1C2=C(OC)C(OC)=C(OC)C=C2CC)=O  
PUGREST.BadRequest: error:  
C1C(C)NC1N[C@H1]2CCC3=CC(OC)=C(OC)C(OC)=C3C4=CC=C(C(=O)C=C42)NC=O  
PUGREST.BadRequest: error:  
CC(C)COC1=C(OC)C(OC)=CC=2CC[C@H1](NC(=O)C)C3=CCC(SC)=CC=C3C=21  
PUGREST.BadRequest: error:  
O=C(N[C@H1]1CCC2=CC(OC)=C(OC)C(OC)=C2C3=CC=C(NC)C(=O)C=C31)N(S)CC  
PUGREST.BadRequest: error:  
O=C(N[C@H1]1CCC2=CC(OC)=C(OC)C(OC)=C2C3=CC=C(NC)C(=O)C=C13)CCOCC  
PUGREST.BadRequest: error:  
O=C(N[C@H1]1CCC2=CC(OC)=C(OC)C(OC)=C2C3=CC=C(NC)C(=O)C=C31)CCOCC  
PUGREST.BadRequest: error:  
COC1=CC2=CC=C(NC)C(=O)C=C2[C@@H1](NC(=O)NC3=CC=C(F)C=C3)CCC=CC(OC)=C1OC  
PUGREST.BadRequest: error:  
COC1=C2C3=CC=C(NC)C(=O)C=C3[C@H1](CCC2=CC(OC)=C1OC)NC(=O)N(CCCCC1)O  
PUGREST.BadRequest: error:  
COC=C1C2=CC=C(NC)C(=O)C=C2[C@@H1](NC(=O)NC3=CC=C(F)C=C3)CCC1C=C(OC)C=COC  
PUGREST.BadRequest: error:  
COC=CC1=CC=C(NC)C(=O)C=C1[C@@H1](NC(=S)NC2=CC=CC=C2)C1  
PUGREST.BadRequest: error:  
N=1C(=CN(N=1)[C@H1]2CCC3=CC(OC)=C(OC)C(OC)=C3C4=CC=C(NC)C(=O)C=C42)C=O  
PUGREST.BadRequest: error:  
C[C@H1](CCC1=C(C(OC)=C(OC)C(OC)=C1)C2=CC=C(C(C=C2)N)C=O)CC=O

PUGREST.BadRequest: error:  
C1=2[C@H1]CCC3=CC(OC)=C(OC)C(OC)=C3C1=CC=C(C(C=2)=O)SCNC(C)=O  
PUGREST.BadRequest: error:  
N1([C@H1]2CCC3=C(C(OC)=C(OC)C(OC)=C3)C4=CC=C(NC)C(C=C24)=O)C=C1I  
PUGREST.BadRequest: error:  
C1=CC(C2=CN(N=N2)[C@@H1]3C4=CC(C(NC)=CC=C4C5=C(OC)C(OC)=C(OC)C=C5CC3)=O)=C1  
PUGREST.BadRequest: error:  
N1([C@H1]2CCC3=C(C(OC)=C(OC)C(OC)=C3)C4=CC=C(NC)C(C=C24)=O)C=C10CC  
PUGREST.BadRequest: error:  
C12N([C@@H1]3C4=CCC(NC)=CC=C4C5=C(OC)C(OC)=C(OC)C=C5CC3)OC=C1CC=C2O  
PUGREST.BadRequest: error:  
N1([C@H1]2CCC3=C(C(OC)=C(OC)C(OC)=C3)C4=CC=C(NC)C(=O)C=C42)COC=CC=C1  
PUGREST.BadRequest: error:  
N1([C@H1]2CCC3=C(C(OC)=C(OC)C(OC)=C3)C4=CC=C(NC)C(C=C24)=O)C=C1C1  
PUGREST.BadRequest: error:  
C=1N([C@H1]2CCC3=C(C(OC)=C(OC)C(OC)=C3)C4=CC=C(NC)C(=O)C=C24)CCNC(=O)OCCN=1  
PUGREST.BadRequest: error:  
N1C(OC)=C(C=C1)N[C@H1]2CCC3=C(C(OC)=C(OC)C(OC)=C3)C4=CC=C(SC)C(C=C42)=O  
PUGREST.BadRequest: error:  
C1[C@@H1](C2=CC(C(SC)=CC=C2C3=C(OC)C(OC)=C(C=C3C1)O)C)ONC(C)=O  
PUGREST.BadRequest: error:  
C1N([C@H1]2CCC3=CC(OC)=C(OC)C(OC)=C3C4=CC=C(NC)C(=O)C=C24)OC(=CC=C1)OSC  
PUGREST.BadRequest: error:  
C1N([C@H1]2CCC3=C(C(OC)=C(OC)C(OC)=C3)C4=CC=C(NC)C(=O)C=C42)CC=C10C  
PUGREST.BadRequest: error:  
N(C(C)C)(C(C)C)C(=O)N1[C@H1]CCC2=C(C(OC)=C(OC)C(OC)=C2)C3=CC=C(NC)C(C=C31)=O  
PUGREST.BadRequest: error:  
N(CCCC)CC1=CN(N=N1)[C@H1]2CCC3=CC(OC)=C(OC)C(OC)=C3C4=CC=C(NC)C(=O)C=C24  
PUGREST.BadRequest: error:  
N(CCCC)CC1=CN(N=N1)[C@H1]2CCC3=C(C(OC)=C(OC)C(OC)=C3)C4=CC=C(NC)C(=O)C=C42  
PUGREST.BadRequest: error:  
C1[C@H1](NCC)CC2=CC(C(NC)=CC=C2C3=C(C(OC)=C(OC)C=C3CC1)OC(C)=O)CC=O  
PUGREST.BadRequest: error:  
C1=C(OC)C(=C(OC)C=C1CC2[C@H1](NC(C(O)=O)C(=O)OCC=CC2=CC=C(NC)CC)OOCN)C  
PUGREST.BadRequest: error:  
C12=C(OC)C(=C(OC)C=C1CC[C@H1](NC(C(O)=O)=CNCC2=CC=C(NC)CC)ONCC)ONC  
PUGREST.BadRequest: error:  
C1=C(OC)C(=C(OC)C=C1CC[C@H1](N2C(C(OCC)=O)=C(N=N2)C(OCC)=O)CCC(NC)=CC=C)ONCOC  
PUGREST.BadRequest: error:  
NC(=S)N1[C@@H1]C2=CC(C(NC)=CC=C2C3=C(OC)C(OC)=C(OC)C=C3CC1)=O  
PUGREST.BadRequest: error:  
C[C@H1](CC1C2=CC(OC)=C(OC)C(OC)=C2C3=CC=C(C(=O)C=C31)SCN)CC  
PUGREST.BadRequest: error:  
N=NC(CO)C(O)(OCC)O[C@@H1]1C2=CC(C(NC)=CC=C2C3=C(OC)C(OC)=C(C=C3CC1)NC)=O  
PUGREST.BadRequest: error:  
C12=CC3=C(OC)C(OC)=C(OC)C=C3CC[C@H1](NC=CC=C)C1=CC(=O)C2SC  
PUGREST.BadRequest: error:  
C1[C@@H1](C2=CCC(NC)=CC=C2C3=C(OC)C(OC)=C(C=C3C1)OC=O)CCO

PUGREST.BadRequest: error:  
COC1=C(OC)C=2C3=CC=C(SC)C(C=C3[C@H1](CCC=2C=C1OC)NCC4=CC=CC)=C4O  
PUGREST.BadRequest: error:  
C=C1C2=C(OC)C(OC)=C(OC)C=C2CC[C@H1](NCCCC1)C1=CC(=O)C(NC)=CNC  
PUGREST.BadRequest: error:  
C=C1C2=C(OC)C(OC)=C(OC)C=C2CC[C@H1](NCCCC1)C1=CC(C(=C)NC)=O  
PUGREST.BadRequest: error:  
C=1=C2C3=C(OC)C(OC)=C(OC)C=C3CC[C@H1](NCC)C2=CC(=O)C(SC)=CC=1NC  
PUGREST.BadRequest: error:  
C1=2[C@@H1](CCC3=CC(OC)=C(OC)C(OC)=C3C1=CC=C(C(C=2)=O)NCNC)CONC  
PUGREST.BadRequest: error:  
C1C2=CC(OC)=C(OC)C(OC)=C2C3=CC=C(NC)C(=O)C=C3[C@H1](C1)NC4C=CC=CS4  
PUGREST.BadRequest: error:  
C[C@@H1](C1=CC(C(NC2)=CC=C1C3=C(OC)C(OC)=C(OC)C=C32)NC)CC  
PUGREST.BadRequest: error:  
N(C=C(O)C=C[C@@H1]1C2)=CC(C(SC)=CC=C2C3=C(OC)C(OC)=C(OC)C=C3CC1)=O  
PUGREST.BadRequest: error:  
C=1[C@H1](NC(N)=N)CC(C2=C(C(OC)=C(OC)C=C2C)OC)=CC=C(NC)C(C=1)=O  
PUGREST.BadRequest: error:  
C1C(C2=C(OC)C(OC)=C(OC)C=C2CC[C@H1]1NC(N)C)C=CC=C(C(C)=O)NC  
PUGREST.BadRequest: error:  
C1[C@H1](NC(N)=S)C2=CCC(NC)=CC=C2C3=C(OC)C(OC)=C(OC)C=C3C1=O  
PUGREST.BadRequest: error:  
C=C(CN[C@H1]1CCC2=CC(OC)=C(OC)C(OC)=C2C3=CC=C(NC)C(C=C13)=O)C=O  
PUGREST.BadRequest: error:  
C1[C@H1](NCCC)C2=CCC(SC)=CC=C2C3=C(OC)C(OC)=C(OC)C=C3CC1=O  
PUGREST.BadRequest: error:  
C1=C(N=NN1[C@H1]2CCC3=CC(OC)=C(OC)C(OC)=C3C4=CC=C(NC)C(=O)C=C24)C  
PUGREST.BadRequest: error:  
C1=C(C(C=C2[C@H1](CCC3=CC(OC)=C(OC)C(OC)=C3C2=C1)NC(C)C)C)OSC  
PUGREST.BadRequest: error:  
C1[C@H1](NC(N)=S)C2=CC(C(NC)=CC=C2C3=C(OC)C(OC)=C(OC)C=C3C1=O)C  
PUGREST.BadRequest: error:  
C=1C=C(NC)C(C=C2C=1C3=C(OC)C(OC)=C(OC)C=C3CC[C@@H1]2NC(C(C)C)=O)SNC  
PUGREST.BadRequest: error:  
C=12C=C(NC)C(C=C3C=1C4=C(OC)C(OC)=C(OC)C=C4CC[C@@H1]3NC(NCCCC=O)N)=C2O  
PUGREST.BadRequest: error:  
C=1C=C(NC)C(C=C2C=1C3=C(OC)C(OC)=C(OC)C=C3CC[C@@H1]2NC(C(C)C)=O)SNC=O  
PUGREST.BadRequest: error:  
C1[C@H1](NC(N(CC=C)CC=C)=S)C2=CC(C(NC)=CC=C2C3=C(OC)C(OC)=C(C=C3C1)OC)NC=O  
PUGREST.BadRequest: error:  
C=CC=C(NC(=O)N[C@H1]1CCC2=CC(OC)=C(OC)C(OC)=C2C3=CC=C(NC)C(=O)C=C13)C  
PUGREST.BadRequest: error:  
C=CC=C(NC([C@@H1]C1=CCC(SC)=CC=C1C2=C(OC)C(OC)=C(OC)C=C2CC)=O)N=O  
PUGREST.BadRequest: error:  
C1=2[C@H1](CCC3=CC(OC)=C(OC)C(OC)=C3C1=CC=C(C(=O)C=2)SCNC(C)=O)C=C  
PUGREST.BadRequest: error:  
C=CC=C(NC(=O)N[C@H1]1CCC2=CC(OC)=C(OC)C(OC)=C2C3=CC=C(NC)C(C=C13)=O)C

PUGREST.BadRequest: error:  
C=1NCC(=O)C=C2[C@H1](CCC3=C(C(OC)=C(OC)C(OC)=C3)C2=CC=1)NC(C(C)C)=O

PUGREST.BadRequest: error:  
C=CC=C(NC(=O)N[C@H1]1CCC2=CC(OC)=C(OC)C(OC)=C2C3=CC=C(NC)C(=O)C=C31)C

PUGREST.BadRequest: error:  
C1=CC=C(NC(=O)N[C@H1]2CCC3=CC(OC)=C(OC)C(OC)=C3C=4C2=CC(C(NC)=CC=4)=O)C1

PUGREST.BadRequest: error:  
C[C@H1](CCC1=CC(OC)=C(OC)C(OC(OC)=O)=C1C2=CC=C(SC)C(=O)C=C2)NCC

PUGREST.BadRequest: error: CCN[C@H1]([C@H1])C1OC(C)(C2)O[C@@H1]1[C@H1](CNC(=S)N[C@H1]CCC3=C(C(OC)=C(OC)C(OC)=C3)C4=CC=C(C(=O)C=C24)NC)O

PUGREST.BadRequest: error:  
CNCC(O)C(OC=C1C=C2C3=C(OC)C(OC)=CC=C3CC[C@H1](NC(C)=O)C2=CC1)=O

PUGREST.BadRequest: error:  
COCC(CN[C@@H1]1C=2C(C3=C(C(OC)=C(OC)C=C3CC1)OC)=CC=C(NC)C(C=2)=O)F

PUGREST.BadRequest: error:  
N=NC(CN1C(=O)OC)=C=C(C=CC=CNCC=CC)C2(NC)C(C(O)=CC2C3=C)(OC)C(OC)=C(OC)C=C3CC1OC

PUGREST.BadRequest: error:  
NC1=NN=NN1[C@@H1]2C=3C(C4=C(C(OC)=C(OC)C=C4CC2)OC)=CC=C(NC)C(C=3)=O

PUGREST.BadRequest: error:  
N=NC(CNC(=O)OC)=C=C(C=CC=CNCC=CC12)C(NC)C(OC)=C(OC)C=C1CC[C@H1](NC(=O)C)C2F

PUGREST.BadRequest: error:  
N=NC(CNC(=O)OC)=C=C(C=CC=CNCC=CC12)C(NC)C(OC)=C(OC)C=C1CC[C@H1](NC(=O)C)C2=CC

PUGREST.BadRequest: error:  
N1C=NN=NN1[C@H1]2CCC3=C(C(OC)=C(OC)C(OC)=C3)C4=CC=C(NC)C(=O)C=C24

PUGREST.BadRequest: error:  
OCCN(CCO)C(=S)N1[C@@H1]C2=CC(C(NC)=CC=C2C3=C(OC)C(OC)=C(OC)C=C3CC1)=O

PUGREST.BadRequest: error:  
N12C=NN=NN1[C@H1]3CCC4=C(C(OC)=C(OC)C=C4C=5C3=CC(C(NC)=CC=5)=O)OCC=C2

PUGREST.BadRequest: error: N=NC(CNC(=O)OC)=C=C(C=CC=CNCC=CC=1)C2(NC)C(C(O)=CC=1C3=C)(OC)C(OC)=C(OC)C=C3CC2OOC

PUGREST.BadRequest: error:  
N1CC=CN([C@@H1]2C3=CC(C(NC)=CC=C3C4=C(CC2)C=C(OC)C(OC)=C4OC)=O)C1C

PUGREST.BadRequest: error:  
N=NC(CNC(=O)OC)=C=C(C=CC=CNCC=CC1)C(NC)C(OC)=C(OC)C=C1CC[C@H1](NC(=O)C)C=CC

PUGREST.BadRequest: error:  
NC(C(OC)=C)N[C@H1]1CCC2=CC(OC)=C(OC)C(OC)=C2C3=CC=C(NC)C(=O)C=C31

PUGREST.BadRequest: error:  
NC(C(OC)=C)N[C@H1]1CCC2=CC(OC)=C(OC)C(OC)=C2C3=CC=C(NC)C(=O)C=C13

PUGREST.BadRequest: error:  
N([C@H1]1CCC2=CC(OC)=C(OC)C(OC)=C2C3=CC=C(NC)C(C=C13)=O)=N

PUGREST.BadRequest: error:  
NC(C(OC)=C)N[C@H1]1CCC2=CC(OC)=C(OC)C(OC)=C2C3=CC=C(NC)C(C=C13)=O

PUGREST.BadRequest: error:  
NC(CCC)N[C@@H1]1C2=CC(C(NC)=CC=C2C3=C(OC)C(OC)=C(OC)C=C3CC1)=O

PUGREST.BadRequest: error:  
N([C@H1]1CCC2=CC(OC)=C(OC)C(OC)=C2C3=CC=C(NC)C(C=C31)=O)=C

PUGREST.BadRequest: error:  
N([C@H1]1CCC2=CC(OC)=C(OC)C(OC)=C2C3=CC=C(NC)C(C=C13)=O)C=CC=C



PUGREST.BadRequest: error:  
N([C@H1]1CCC2=CC(OC)=C(OC)C(OC)=C2C3=CC=C(NC)C(C=C13)=O)=CC  
PUGREST.BadRequest: error:  
C1=2[C@H1](CCC3=C(C(OC)=C(OC)C(OC)=C3)C1=CC=C(C(C=2)=O)NCNCC(C)C)ONC  
PUGREST.BadRequest: error:  
C1=2[C@H1](CCC3=C(C(OC)=C(OC)C(OC)=C3)C1=CC=C(C(C=2)=O)NCNCC)OCSC  
PUGREST.BadRequest: error:  
C12[C@@H1](CC(C3=C2C(OC)=C(OC)C=C3C1)OC=CC=C(NC)CC)ONC(C)=O  
PUGREST.BadRequest: error: N(C)C=1C(=O)C=C2[C@H1](CCC3=C(C(OC)=C(OC)C(OC)=C3)C2=CC=1)N4C(C(=O)O)=C(N=N4)C(=O)N  
PUGREST.BadRequest: error:  
C1[C@H1](NCC)CC2=CC(C(NC)=CC=C2C3=C(C(OC)=C(OC)C=C3CC1)OC(C)=O)(C)ONC=O  
PUGREST.BadRequest: error:  
N(CCCC)CNCC1=CN(N=N1)[C@H1]2CCC3=CC(OC)=C(OC)C(OC)=C3C4=CC=C(NC)C(=O)C=C24  
PUGREST.BadRequest: error:  
C12[C@H1](NCC)CC3=CC2(C(SC)=CC=C3C4=C(C(OC)=C(OC)C=C4CC1)OCNC(C)=O)NC  
PUGREST.BadRequest: error:  
C1=C(O)C(OC)=C(OC)C=CCC[C@H1](NN=NCC(O)=O)OC2=CC(C(NC)=CC=C12)=O  
PUGREST.BadRequest: error:  
C12=C(OC)C(=C(OC)C=C1CC[C@H1](NC(C(=O)OCC)=C(COCC)OCCC(NC)=CC=CON)C=C2N)C  
PUGREST.BadRequest: error:  
N(C)C=1C(=O)C=C2[C@H1](CCC3=C(C(OC)=C(OC)C(OC)=C3)C2=CC=1)NC(C(=O)O)=C(COCC)C=O  
PUGREST.BadRequest: error: N(C)C=1C(=O)C=C2[C@H1](CCC3=CC(OC)=C(OC)C(OC)=C3C2=C(C=1N4)C(C(=O)O)=C(N=N4)C(O)=O  
PUGREST.BadRequest: error:  
C12=C(OC)C(=C(OC)C=C1CC[C@H1](NC(C(=O)OCC)=C(COCC)OCCC(NC)=CC=CON)C=C2)NC  
PUGREST.BadRequest: error: O=C(C=C(C(OC1C2)=O)N(N=N2)[C@@H1]3C=4C(C5=C(C(OC)=C(OC)C=C5CC3)OC)=CC=C(NC)CC=4)OC(Cl)=C1C  
PUGREST.BadRequest: error: O=C(C=C(C(OC1)=O)N(N=N1)[C@@H1]2C=3C(C4=C(C(OC)=C(O)C)C=C4CC2)OC)=CC=C(NC)CC=3)OC(Cl)=CC  
PUGREST.BadRequest: error: O=C(C=C(C(OC1)=O)N(N=N1)[C@@H1]2C=3C(C4=C(C(OC)=C(O)C)C=C4CC2)OC)=CC=C(NC)CC=3)OC(Cl)=C  
PUGREST.BadRequest: error: O=C(C=C(C(OC1)=O)N(N=N1)[C@@H1]2C=3C(C4=C(C(OC)=C(O)C)C=C4CC2)OC)=CC=C(NC)CC=3)OC=CCCC  
PUGREST.BadRequest: error:  
OC(\N[C@H1]1CCC2=CC(OC)=C(OC)C(OC)=C2C3=CC=C(C(C=C31)=O)NCNC(C)C)=O  
PUGREST.BadRequest: error:  
O1CC(C2)=CC(=C13)C4=C(OC)C(OC)=C(OC)C=C4CC[C@H1](NC(NC5=CC=C(C=C5)Cl)=S)C3=CC2=O  
PUGREST.BadRequest: error: N1=CC=C(C=C1)C(NCC=2N=NN(C=2)[C@H1]3CCC4=CC(OC)=C(OC)C(OC)=C4C5=CC=C(C(C=C53)=O)N)C=O  
PUGREST.BadRequest: error:  
OC(NCC1=CC(OC)=C(OC)C=C1CC[C@H1](NCN(CC)CC)C2=CCC(NC)=CC=C2)=O  
PUGREST.BadRequest: error:  
NC(=CN/C(=NC(O)C=CCI)C1=CN(NC1)C=CC2=CC(NC)=CC(OC)=C2C=CC(OC3)C(OC)=CC=C3)C=CC=O  
PUGREST.BadRequest: error:  
O=CC(=CC1=CC([C@@H1](NC(C(O)=O)=C(N=C)CCCC2)CC(OC)=C(OC)C(OC)=C21)NC)O  
PUGREST.BadRequest: error: NC(=CN/C(=NC(O)C=CCI)C1=CN(N2C1)C=CC3=CC(NC)=CC(OC)=C3C=CC4(OC)C(OC)=CC=C4)CC[C@@H1]2N=O

PUGREST.BadRequest: error: 0=CC(=CC=C1C([C@@H1](N2C(C(O)=O)=C(N=C2)C(=O)C)CCC3=CC(OC)=C(OC)C(OC)=C31)=C)NC=O

PUGREST.BadRequest: error: OCC(C)=C1C([C@@H1](CCC2=CC(OC)=C(OC)C(OC)=C12)NC(NC3=CC=C(C=C3)F)=O)PNC=O

PUGREST.BadRequest: error: 0=CC(=CC=C1C([C@@H1](N2C(C(=O)O)=C(C(=O)O)N=N2)CCC3=CC(OC)=C(OC)C(OC)=C31)=C)NC=O

PUGREST.BadRequest: error: OC(\N[C@@H1]1CCC2=CC(OC)=C(OC)C(OC)=C2C3=CC=C(C(C=C13)=O)NCNC(C)C)=O

PUGREST.BadRequest: error: N1=CC=C(C=C1)C(NCC=2N=NN(C=2)[C@@H1]3C4=CCC(NC)=CC=C4C5=C(OC)C(OC)=C(OC)C=C5CC3)=O

PUGREST.BadRequest: error: N1=CC=C(C=C1)C(NCC=2N=NN(C=2)[C@@H1]3C4=CCC(NC)=CC=C4C5=C(OC)C(OC)=C(C=C5CC3)OC)=O

PUGREST.BadRequest: error: CC(C)(C)OC(=O)/N=C(/N[C@@H1]1CCC2=C(C(OC)=C(OC)C(OC)=C2)C3=CC=C(NC)C(C=C13)=O)N=N

PUGREST.BadRequest: error: CC(C)(C)OC(=O)NCCCNCC1=CN(N=N1)[C@@H1]2CCC3=CC(OC)=C(OC)C(OC)=C3C4=CC=C(NC)C(=O)C=C42

PUGREST.BadRequest: error: CC(C)(C)OC(=O)/N=C(/N[C@@H1]1CCC2=C(C(OC)=C(OC)C(OC)=C2)C3=CC=C(NC)C(C=C31)=O)N=N

PUGREST.BadRequest: error: C(=CNCNC(=O)OCC(C1)(C1)C1)[C@@H1]CCC1=C(C(OC)=C(OC)C(OC)=C1)C2=CC=C(NC)C(=O)C=C2

PUGREST.BadRequest: error: CC(C)(C)OC(=O)NCCCNCC1=CN(N=N1)[C@@H1]2CCC3=CC(OC)=C(OC)C(OC)=C3C4=CC=C(NC)C(=O)C=C24

PUGREST.BadRequest: error: C1=C(OC)C(OC)=C(OC=2)C=3CC([C@@H1](CCC=3)C(C(O)=O)=C(COC(=O)CCC=C1)CCC(=CC=2)NC)=O

PUGREST.BadRequest: error: CCCC(=O)C=C1C(C2=C(OC)C(OC)=C(C=C2CC[C@@H1]1NCN)N)OCC

PUGREST.BadRequest: error: CNCCC=C1C(C2=C(OC)C(=C(C=C2CC[C@@H1]1NCN)C)OO)COC

PUGREST.BadRequest: error: COC1=CC2=C(C3=C(OC)C(OC)=CC=C3CC[C@@H1]2NOC)CC=C1OC

PUGREST.BadRequest: error: CNCC(C=C1C(C2=C(OC)C(=CC=C2CC[C@@H1]1NCN)C)=O)COC

PUGREST.BadRequest: error: CNCC(C=C1C(C2=C(OC)C=C(OC)C=C2CC[C@@H1]1NC=O)C)OC=O

PUGREST.BadRequest: error: C=C1C=2C[C@@H1](CC(C3=CC(OC)=C(OC)C=C31)C=CC=CSC)C(=O)C=2

PUGREST.BadRequest: error: COC=C1C2=CC=C(NC)C(=O)C=C2[C@@H1](CCC1C=COC)NCCCC1

PUGREST.BadRequest: error: C=1NCC=1C=C2C(C3=C(OC)C(=C(OC)C=C3CC[C@@H1]2N)[N+1]=[N-1])OC=CC

PUGREST.BadRequest: error: C1=C2CC[C@@H1](C3=CCC(SC)=CC=C3C2=C(OC)C(=C1OC)OC=O)N

PUGREST.BadRequest: error: C=C1CC[C@@H1](CC(C2=CC(OC)=C(OC)C=C21)C=CC=CSC)C(=O)CN

PUGREST.BadRequest: error: C=C1CC[C@@H1](C=2C(C3=CC(OC)=C(OC)C=C31)C=CC=CSC)C(C=2)=O

PUGREST.BadRequest: error: COC1=C2C3=CC=C(NC)C(C=C3[C@@H1](NCCCCC)CCC2=CC(=C1OC)O)C=O

PUGREST.BadRequest: error: C=C1CC=2[C@@H1](CC(C3=CC(OC)=C(OC)C=C31)C=CC=CSC)C(C=2)=O

PUGREST.BadRequest: error: COC1=C2C3=CC=C(NC)C(=O)C=C3[C@@H1](CCC2=CC(OC)=C1OC)NCCCCCSC

PUGREST.BadRequest: error: C=C(CO)CN[C@@H1]1CCC2=CC(OC)=C(OC)C(OC)=C2C3=CC=C(SC)C(=O)C=C31

PUGREST.BadRequest: error:  
 CC(C)CN[C@H1]1CCC2=CC(OC)=C(OC)C(OC)=C2C3=CC=C(C(C=C31)=O)SCC  
 PUGREST.BadRequest: error:  
 CC(C)CCN[C@H1]1CCC2=CC(OC)=C(OC)C(OC)=C2C3=CC=C(C(C=C13)=O)SCC  
 PUGREST.BadRequest: error:  
 C=1NCC(=O)C=C2C(C3=C(OC)C(OC)=C(C=C3CC[C@@H1]2NCCC#N)C)=CC=1  
 PUGREST.BadRequest: error: C12=CCC[C@H1]2CC1(C3=CC(OC)=C(OC)C(OC)=C3)CC=C  
 PUGREST.BadRequest: error:  
 C1=C2CC[C@H1](C3=CCC(SC)=CC=C3C2=C(C(OC)=C1OC)OON)CNCCC  
 PUGREST.BadRequest: error:  
 C1=C2CC[C@H1](C3=CCC(SC)=CC=C3C2=C(OC)C(=C1OC)OC=O)NCCCC  
 PUGREST.BadRequest: error:  
 CC(C)CCN[C@H1]C1CC2=CC(OC)=C(OC)C(OC)=C2C3=CC=C(SC)C(C=C31)=O  
 PUGREST.BadRequest: error:  
 C1=C(CO2)CN1C[C@@H1]C3=CC(C(SC)=CC=C3C4=C(OC)C(OC)=C(OC)C=C4CC2)=O  
 PUGREST.BadRequest: error:  
 C=C1CC=2[C@H1](CC(C3=CC(OC)=C(OC)C=C31)C=CC=CSC)C(=O)C=2N=[N+1]=[N-1]  
 PUGREST.BadRequest: error:  
 CNCC(C1=C2C(C3=C(OC)C(=C(OC)C=C3CC[C@@H1]2NCCC#N)OC)=CC1)=O  
 PUGREST.BadRequest: error:  
 N=1NC=1[C@H1]2C3=CC(C(NC)=CC=C3C4=C(C=C(OC)C(=C4OC)OC)CC2)=O  
 PUGREST.BadRequest: error:  
 C1=C2CC[C@H1](C3=CCC(NC)=CC=C3C2=C(OC)C(=C1OC)OC)ONCCC#N  
 PUGREST.BadRequest: error:  
 COC=C1C2=CC=C(NC)C(C=C2[C@@H1](NCCCCCCC)CCC1=CC(=COC)OC)=O  
 PUGREST.BadRequest: error:  
 COC1=C2CC([C@H1](CCC2=CC(OC)=C1OC)NCCC#N)C(C(=CC)NC)=O  
 PUGREST.BadRequest: error:  
 C1=C2CC[C@H1](C3=CCC(NC)=CC=C3C2=C(OC)C(=C1OC)OC=O)NCCCCCCCCCCC  
 PUGREST.BadRequest: error:  
 COC=C1C2=CC=C(NC)C(C=C2[C@@H1](NCCCCCCCCCCC)CCC1=CC(=COC)OC)=O  
 PUGREST.BadRequest: error:  
 COC=C1C2=CC=C(NC)C(C=C2[C@@H1](NCCCCCCCCCCC)CC=CC(=C1OC)OC=O)CC  
 PUGREST.BadRequest: error:  
 COC1=C2CC([C@H1](CCC2=CC(OC)=C1OC)N3N=NC=C3)CN=CC(C(=CC)NC)=O  
 PUGREST.BadRequest: error:  
 C1NCC(=O)C=C2C(C3=C(OC)C(OC)=C(OC)C=C3CC[C@@H1]2N4C=C(N=N4)CNN)=CC=C1  
 PUGREST.BadRequest: error:  
 COC=C1C2=CC=C(NC)C(C=C2[C@@H1](N3C=C(N=N3)CCCC)CCC=CC(=C1OC)O)C=O  
 PUGREST.BadRequest: error:  
 COC1=C2CC([C@H1](CCC2=CC(OC)=C1OC)NC/C=C/C3=CC=CC)=C3CC(C(SC)=CC)=O  
 PUGREST.BadRequest: error:  
 COC1=C2CC([C@H1](CCC2=CC(OC)=C1OC)N3N=NC=C3)CN=CC(=O)C(NC)=CC  
 PUGREST.BadRequest: error:  
 COC1=C2C3=CC=C(NC)C(=O)C=C3[C@H1](CCC2=CC(OC)=C1OC)NCC(C)C  
 PUGREST.BadRequest: error:  
 COC=C1C2=CC=C(NC)C(C=C2[C@@H1](NCC(C)C)CCC1=CC(=COC)OC)=O  
 PUGREST.BadRequest: error:

C1=C2CC[C@H1](C3=CCC(SC)=CC=C3C2=C(OC)C(=C1OC)OC=O)NCCC  
 PUGREST.BadRequest: error:  
C1=C2CC[C@H1](C3=CCC(SC)=CC=C3C2=C(C(OC)=C1OC)OON)COCC  
 PUGREST.BadRequest: error:  
COC1=C(OC)C(OC)=CC=2CC[C@@H1](C3=CC(C(=CC=C3C1=2)SC)=O)NCCC(C)CC  
 PUGREST.BadRequest: error:  
C12=CC(C(SC)=CC=C1C=C(CC[C@@H1]2NCCC3=CC=CC=C3)C=C(OC)C(OC)=CO)C=O  
 PUGREST.BadRequest: error:  
C1=C2C(C3=C(C(OC)=C(OC)C=C3CC[C@@H1]2NCCC(F)F)F)OC=CC=C(C1=O)NC  
 PUGREST.BadRequest: error:  
C12=CC(C(NC)=CC=C1C3=C(C=C(OC)C(OC)=C3OC)CC[C@@H1]2NCCC(F)F)F  
 PUGREST.BadRequest: error:  
C1=C2C([C@H1](CCC3=CC(OC)=C(C(OC)=C23)OC)NCCCC1)C(=O)C(=C1)NC  
 PUGREST.BadRequest: error:  
C12=CC(C(NC)=CC=C1C3=C(C=C(OC)C(OC)=C3OC)CC[C@@H1]2NCC=4SC=CC=4OC)=O  
 PUGREST.BadRequest: error:  
C12=CCC(NC)=CC=C1C3=C(OC)C(=C(C=C3CC4[C@@H1]2NCC4CCCOC)OC)O  
 PUGREST.BadRequest: error:  
O=CC1=CN=NN1[C@H1]2CCC3=CC(OC)=C(OC)C(OC)=C3C4=CC=C(C(C=C24)=O)NCCC  
 PUGREST.BadRequest: error:  
C12=NCCC13[C@H1](CNC(CCC=CC=CC3=O)=C(OC)C(OC)=C(OC)C)C2SC=CCNC  
 PUGREST.BadRequest: error:  
C1=CN=CC=C1CN[C@H1]2CCC3=CC(OC)=C(OC)C(OC)=C3C4=CC=C(C(C=C42)=O)SCC(=O)C  
 PUGREST.BadRequest: error:  
O=CC1=CN=NN1[C@H1]2CCC3=CC(OC)=C(OC)C(OC)=C3C4=CC=C(C(C=C42)=O)NCCC  
 PUGREST.BadRequest: error:  
C1=CN=CC=C1CN[C@H1]2CCC3=CC(OC)=C(OC)C(OC)=C3C4=CC=C(C(C=C42)=O)SCC  
 PUGREST.BadRequest: error:  
C1=NCCC12[C@H1](CC3C=CC(OC)=C(OC)C(OC(=O)C)=CC=C23)C(C)=O  
 PUGREST.BadRequest: error:  
C12[C@H1]C=CCC[C@H1](N=C(COCC)CC3=CCC(NC)=CC=C31)C(OC)C(OC)=C2OC=O  
 PUGREST.BadRequest: error:  
OC1=CC=C(C=C1)CN[C@@H1]2C3=CC(C(SC)=CC=C3C4=C(C(OC)=C(OC)C=C4CC2)OC)=O  
 PUGREST.BadRequest: error:  
O=CC1=C2[C@H1](CCC3=CC(OC)=C(OC)C(OC)=C3C2=CC=C(OC(=O)CC)C1=O)CC=O  
 PUGREST.BadRequest: error:  
C=C1N=CC(C)N1CN[C@H1]2CCC3=C(C(OC)=C(OC)C(OC)=C3)C4=CC=C(C(C=C24)=O)NC  
 PUGREST.BadRequest: error:  
OC1=CC=C(C=C1)CN[C@H1]2CCC3=C(C(OC)=C(OC)C(OC)=C3)C4=CC=C(C(C=C42)=O)SC  
 PUGREST.BadRequest: error:  
O=CC1=C2[C@H1](CCC=C3C(OC)=C(OC)C(OC(C)=O)=C3C1=CC=C(SC)C2=O)CC=O  
 PUGREST.BadRequest: error:  
C1=CC2C[C@H1](NC(C)=O)C3=CC(C(SC)=CC=C3C2=C(OC)C(OC)=C1OC(C4=CC=CC=C4)=O)SC=O  
 PUGREST.BadRequest: error:  
OC1=CC=C(C=C1)CN[C@@H1]2C3=CC(C(SC)=CC=C3C4=C(OC)C(OC)=C(OC)C=C4CC2)=O  
 PUGREST.BadRequest: error:  
O=CC1=C[C@H1](CCC2=CC(OC)=C(OC)C(OC(=O)C)=C2C1=CC=C(SC)C=O)CC=O  
 PUGREST.BadRequest: error:

CNCC(C)OC(=O)N[C@H]1CCCC2=C(C(OC)=C(OC)C(OC)=C2)C3=CC=C(C(=O)C=C31)NCF  
 PUGREST.BadRequest: error:  
C1OC2=CC=C(C(OC)=C2OC)C3=CC=C(SC)C1(C=C3[C@@H]1)(NC(N(COC)C)O)C=C)ONC  
 PUGREST.BadRequest: error:  
COC1=C2C=C(C(OC)=C1OC)C3=CC=C(SC)C(C=C3[C@@H]1)(NCN=CC=C(F)C=COC)C2)NC=O  
 PUGREST.BadRequest: error:  
C1OC2=CC=C(C(OC)=C2OC)C3=CC=C(SC)C(C=C3[C@@H]1)CCCC(=O)C(OC)=C(O)CSCSC  
 PUGREST.BadRequest: error:  
C=C1CC[C@H]1(N2C(C(OCC)=O)=C(N=N2)C=CC(=O)C3NC)CC=CC=C3C=C1CNCOCOC  
 PUGREST.BadRequest: error:  
OC=CC=CCCN[C@H]1CCCC2=CC(OC)=C(OC)C(=C2C3=CC=C(SC)C(=O)C=C13)OCC  
 PUGREST.BadRequest: error:  
COC1=CC=C(C(OC)=C1OC)C2=CC=C(SC)C(C=C2[C@@H]1)NC(N(COC)C)=C)ONC=O  
 PUGREST.BadRequest: error:  
C=C1CC2[C@H]1(NC(C(=O)OCC)=C2)C3=CC(C(NC)=CC=C3C4=C(C(OC)=C(C=C41)OC)OC)=O  
 PUGREST.BadRequest: error:  
C1=CC=2C[C@H]1(NCN(C(C)C)C(C)C)OC3=CC(C(NC)=CC=C3C=2C=C(C(=C1)OC)OC)NC=O  
 PUGREST.BadRequest: error:  
COC1=C2C=C(C(OC)=C1OC)C3=CC=C(NC)C(C=C3[C@@H]1)(NC(N(COC)C)O)CC2)NC=O  
 PUGREST.BadRequest: error:  
C1OC2=CC=C(C(OC)=C2OC)C3=CC=C(SC)C(C=C3[C@@H]1)CCCC(=O)C(OC)=C(C)C=O  
 PUGREST.BadRequest: error:  
COC1=CC2=C(C(OC)=C1OC)C3=CC=C(SC)C2(C=C3[C@@H]1)NC(N(COC)C)=C)ONC  
 PUGREST.BadRequest: error:  
CC12[C@H]1(CCC3=CC(OC)=C(OC)C(OC)=C3C1=CC=CC(=O)C2)SCNC(C)=O  
 PUGREST.BadRequest: error:  
C=CC=C(CCN[C@H]1)CCCC2=CC(OC)=C(OC)C(OC)=C2C3=CC=C(SC)C(C=C31)=O)OC  
 PUGREST.BadRequest: error:  
CCOC(OC1=C2CC([C@H]1)(CCC2=CC(OC)=C1OC)NC(C)=O)=CC(C(SC)=CC)=O)SC=O  
 PUGREST.BadRequest: error:  
CC12[C@H]1(CCC3=CC(OC)=C(OC)C(OC)=C3C1=CC=CC(C2)=O)SCNC(C)=O  
 PUGREST.BadRequest: error:  
C1C=CC=C(SCC1)C=CN(N2C3OC)[C@@H]12NC(=O)CNC(=O)OCCCC4C=CC(=C)C=C4C=CC=C(NC)CCC3  
 PUGREST.BadRequest: error:  
CC1=C2C=C(SC)C(C=C1[C@@H]1)(NC(C)=O)CCC=CC(OC)=C(OC)COC=CC=C2SC)=O  
 PUGREST.BadRequest: error:  
CC1=CC=C(S=2C)C(C=C1[C@@H]1)(NC(=O)C)CCC=CC(OC)=C(OC)C(OC=CC=O)C=2)SC=O  
 PUGREST.BadRequest: error:  
C1COC1(OC2=CC=C3C4=C(OC)C(OC)=C(OC)C=C4CC[C@@H]1)(C3=CC2=O)SC(C)=O)SC  
 PUGREST.BadRequest: error:  
CC1=CC=C(S=2C)C(C=C1[C@@H]1)(NC(C)=O)CCC=CC(OC)=C(OC)C(OC=CC=O)C=2)SC=O  
 PUGREST.BadRequest: error:  
C1C=CC=C(SC2C1)C3=C(C(OC)=C(OC)C=C3CC[C@@H]1)2NC(C)=O)OC=CC=C(SC)C=O  
 PUGREST.BadRequest: error:  
CC1=C2C=C(SC)CC=C1[C@@H]1(NC(=O)C)CCC=CC(OC)=C(OC)C(OC=CC2)=O  
 PUGREST.BadRequest: error:  
C=C1C(C2=C(C(OC)=C(OC)C=C2CC[C@@H]1)NC(C)=O)OC)(C3=CC=CC=C3)OCC=C(SC)C=O  
 PUGREST.BadRequest: error:

C1=C2C(C(OC(CC)=O)=CC=C1C3=C(OC)C(OC)=C(OC)C=C3CC[C@@H1]NSC=CC2)=O  
PUGREST.BadRequest: error:  
OC(NC(=O)OC)C=CC=C1C([C@H1](CCC2=CC(OC)=C(OC)C(OC)=C21)N=C)C=O  
PUGREST.BadRequest: error:  
O1C(OC(=O)OC)=CC2=CC([C@@H1](NC(C)=O)CCC3=CC(OC)=C(OC)C(OC)=C32)=CC1NC  
PUGREST.BadRequest: error:  
C=1=CC(C(C=C2[C@H1](CCC3=C(C(OC)=C(OC)C(OC)=C3)C2=1)NC(C)=O)=C)=O  
PUGREST.BadRequest: error:  
C1[C@@H1](C2=CC(C(OC)=CC=C2C3=C1C=C(OC)COC)=C3OC=O)CC=O  
PUGREST.BadRequest: error:  
C=CC(C(OC(CC)=O)=CC=CC1=C(OC)C(OC)=C(OC)C=C1CC[C@@H1]NSC(=O)CC)=O  
PUGREST.BadRequest: error:  
O=C(OC1=C2C(CC[C@H1](NC(=O)C)C3=CC(C(SC)=CC=C32)=O)=CC(OC)=C1OC)SCC  
PUGREST.BadRequest: error:  
CN(C(=S)N[C@H1]1C2=CCC(NC)=CC=C2C3=C(C(OC)=C(OC)C=C3CC1)OC)OC  
PUGREST.BadRequest: error:  
C1=C2C3(C(OC(C)=O)=CC=C1C4=C(OC)C(OC)=C(OC)C=C4CC[C@@H1]3NSC=C)C2=O  
PUGREST.BadRequest: error:  
O1C(OC(=O)OC2)=CC=CC([C@@H1](NC(C)=O)CCC3=CC(OC)=C(OC)C(OC)=C32)=CC1NC  
PUGREST.BadRequest: error:  
N1([C@H1]2CCC=C(C(OC)=C(OC)C(OC)=C2C3=CC=C(SC)CC=C3)OC=C1)F  
PUGREST.BadRequest: error:  
O=C(OC1=C2CC([C@H1](CCC2=CC(OC)=C1OC)NC(C)=O)=CC(C(SC)=CC)=O)C  
PUGREST.BadRequest: error:  
C1N(C(=O)N[C@H1]2CCC3=CC(OC)=C(OC)C(OC)=C3C4=CC=C(NC)CC=C24)OC=C1  
PUGREST.BadRequest: error:  
NC(=CN(NCC)CCCN1[C@@H1]C=C2CC(C)=CC=C2C3=C(CC1)C=C(OC)C(OC)=C3OC)OF  
PUGREST.BadRequest: error:  
OC=C(OC)C=C1C(C2=CC=C(SC)C(C=C2[C@H1](CC1)NC(C)=O)OCC)=O  
PUGREST.BadRequest: error:  
O=C1C=CC=C2C([C@H1](CCC3=CC(OC)=C(OC)C(OC)=C32)NC(C)=O)=C1SC  
PUGREST.BadRequest: error:  
C1=CC=C(C=C1)CN[C@H1]2CCC3=CC(OC)=C(OC)C(OC)=C3C4=CC=C(C(C=C42)=O)SCC  
PUGREST.BadRequest: error:  
O=CC(=CC=C1C([C@H1](CCC2=CC(OC)=C(OC)C(OC)=C21)NC(C)=O)SC)O  
PUGREST.BadRequest: error:  
N=1C(=CN(N=1)[C@@H1]2C3=CCC(NC)=CC=C3C4=C(OC)C(OC)=C(OC)C=C4CC2)F  
PUGREST.BadRequest: error:  
CC=CCCCN[C@H1]1CCC2=CC(OC)=C(OC)C(OC)=C2C3=CC=C(SC)C(C=C13)=O  
PUGREST.BadRequest: error:  
C1=CC=C(S1C)C2=CN(NC2)[C@H1]3CCC4=CC(OC)=C(OC)C(OC)=C4C5=CC=C(NC)C(=O)C=C35  
PUGREST.BadRequest: error:  
OC1=C(C=CC=C1)CN2[C@H1]CCC3=CC(OC)=C(OC)C(OC)=C3C4=CC=C(SC)C(C=C24)=O  
PUGREST.BadRequest: error:  
OC=C(OC)C=C1C(C2=CC=C(SC)C(C=C2[C@@H1](NC(C)=O)CC1)=O)(C)OSC  
PUGREST.BadRequest: error: C=C1CC(=C2C=C(SC)CC=C[C@H1]CCC2=CC(OC)=C1O)C(OCC)=O  
PUGREST.BadRequest: error:  
OC1=C(C=CC=C1)CN[C@@H1]2C3=CC(C(SC)=CC=C3C4=C(CC2)C=C(OC)C(OC)=C4OC)SC=O

PUGREST.BadRequest: error:  
C1=C2CC[C@H1](C3=CCC(NC)=CC=C3C2=C(C(OC)=C1OC)OC=O)NCCCCC  
PUGREST.BadRequest: error:  
COC1=C2C3=CC=C(NC)C(C=C3[C@@H1](NCCCCCCCC)CCC1=CC=C2OC)OC=O  
PUGREST.BadRequest: error:  
C=1NCC(=O)C=C2C=1C3=C(OC)C(OC)=C(C=C3CC[C@@H1]2NCCCCCO)C=CC  
PUGREST.BadRequest: error:  
C=C1CC2[C@H1](CCC3=C(C(OC)=C(OC)C(=C3)OC)C2=CC=C1)SC=O  
PUGREST.BadRequest: error:  
C1OC2=C3C4=CC=C(NC)C(=O)C=C4[C@H1](CCC3=CC(OC)=C2OC)NCCCCC=C1  
PUGREST.BadRequest: error:  
COC=C1C2=C3C=C(NC)C(C=C2[C@@H1](NCCCCCCCC)CCC1=CC(=C3OC)O)OC  
PUGREST.BadRequest: error:  
COC1=C2C3=CC=C(NC)C(=O)C=C3[C@H1](CCC2=CC(OC)=C1OC)NCCCCCCCCSC  
PUGREST.BadRequest: error:  
COC1=C2C3=CC=C(NC)C(C=C3[C@@H1](NCCCCCCCC)CCC1=CC(=C2OC)OCS)C=O  
PUGREST.BadRequest: error:  
C1=C2CC[C@H1](C3=CCC(SC)=CC=C3C2=C(C(OC)=C1OC)OC=O)NCCCCC  
PUGREST.BadRequest: error:  
COC=CC1=C2C=C(NC)C(C=C1[C@@H1](NCCCCCCCC)CCC=CC(=C2OC)O)C=O  
PUGREST.BadRequest: error:  
C1=C2CC[C@H1](C3=CCC(NC)=CC=C3C2=C(OC)C(=C1OC)OC)ONCCCCC  
PUGREST.BadRequest: error:  
COC=C1C2=CC=C(NC)C(C=C2[C@@H1](NCCCCC)CCC1=CC(=COC)OC)SC=O  
PUGREST.BadRequest: error:  
C1=C2CC[C@H1](C3=CCC(SC)=CC=C3C2=C(OC)C(=C1OC)OC=O)NCCCCC  
PUGREST.BadRequest: error: CNC=CC=C1C([C@H1](CCC2=CC(=C(OC)C(OC)=C12)OC)NCC)=O  
PUGREST.BadRequest: error:  
CSC=1C(C=C2C(=CC=1)C3=C(OC)C=CC=C3CC[C@@H1]2NCN)COCOC  
PUGREST.BadRequest: error:  
C=1SC=2C=1C=C3C(=CC=2)C4=C(OC)C(=CC=C4CC[C@@H1]3NCN)C  
PUGREST.BadRequest: error:  
COC1=CC=2CC[C@@H1](C=3C(C=2C(=C1OC)OC)=CC=C(NC)C(=O)C=3)NC(=O)CNC  
PUGREST.BadRequest: error:  
CSC1=CC=C2C(=CC1=O)[C@H1](CCC3=CC(OC)=C(OC)C(=C23)O)CNC(=O)C  
PUGREST.BadRequest: error:  
COC1=CC=2CC[C@@H1](C3=CC(=O)C(NC)=CC=C3C=2C(OC)=C1OCN)C(=O)C  
PUGREST.BadRequest: error:  
CSC=1C(C=C2C(=CC=1)C3=C(OC)C(=C(OC)C=C3CC[C@@H1]2NCN)O)OCNC  
PUGREST.BadRequest: error:  
CNC=CC=C1C[C@H1](CCC2=CC(=C(OC)C(OC)=C12)OC)N=CC(=O)OCOO  
PUGREST.BadRequest: error:  
C1=C2[C@H1](CCC3=C(C(OC)=C(C(=C3)OC)OC)C2=CC=C(C1=O)NC)NC  
PUGREST.BadRequest: error:  
C1SCC(C=C2C(C3=C(C=C(OC)C(OC)=C3OC)CC[C@@H1]2N)=C1)=O  
PUGREST.BadRequest: error:  
CNC=1C(C=C2C(=CC=1)C3=C(OC)C(OC)=C(C=C3CC[C@@H1]2NC(C)=O)O)C=O  
PUGREST.BadRequest: error:

COC=C1C=2CC[C@H1](NC(C)=O)C3=CC(=O)C(SC)=CC=C3C=2C(O)=C1OC  
PUGREST.BadRequest: error:  
COC=C1CCC2[C@H1](O)CCC3=CC(=C(OC)C(OC)=C3C2=CC1OCN)C(=O)C  
PUGREST.BadRequest: error:  
COC=C1CCC2[C@H1](O)CCC3=CC(=C(OC)C(OC)=C3C2=CC1OCNC)C=O  
PUGREST.BadRequest: error:  
COC=C1CCC[C@H1](O)CCC2=CC(=C(OC)C(OC)=C2C=CC1OC)NC(=O)C  
PUGREST.BadRequest: error:  
CNC=1C(C=C2C(=CC=1)C3=C(OC)C(OC)=CC=C3CC[C@@H1]2NC(C)=O)OC=O  
PUGREST.BadRequest: error:  
C1OC=CC=2CC[C@H1](NC(N)=O)C3=CC(C(=CC=C3C=2C(OC)=C1OC)NC)=O  
PUGREST.BadRequest: error: COC=C1CCC[C@H1](NC(N)=O)C2=CCC(=CC=C2C1C(O)C=O)NC  
PUGREST.BadRequest: error:  
CSC=1CC=CC(=C2C=1)C3=C(OC)C(OC)=C(C=C3CC[C@@H1]2NOCNC)O  
PUGREST.BadRequest: error:  
NN(C[C@H1](OC[C@@H1][C@@H1](CO)O)OS1C2=CCC(NC)=CC=C2C3=C(C=C(C(=C3OC)OC)OC)CC1)O  
PUGREST.BadRequest: error: C=12OC3=CCCC[C@H1](N)CC(C=1C(=C2OC)OC)=CC=C(O)CC3=O  
PUGREST.BadRequest: error:  
CNC=1C(C=CC(=C2C=1)C3=C(OC)C(OC)=CC=C3CC[C@@H1]2NOCSC)C=O  
PUGREST.BadRequest: error: CSCCC=C1C(C2=CC=C(OC)C(OC)=C2OC)CC[C@@H1]1N=O  
PUGREST.BadRequest: error:  
CNC=1CC=CC(=C2C=1)C3=C(OC)C(OC)=C(C=C3CC[C@@H1]2NOCSC)C=O  
PUGREST.BadRequest: error: COC=C1C2CC[C@H1](N)CCC3=CC(=C(OC)C=C3C2=CC1OCS)C  
PUGREST.BadRequest: error:  
CC(=O)C(S1=2C3)CC(OC)=C(OC)C(C)=C1C3=CC=C(SC)C(C=2)=O  
PUGREST.BadRequest: error:  
C1C(=O)C=CC2=C(SC)C(OC)=C(OC)C(C)=CCC[C@@H1](C2=C1)NC(=O)C  
PUGREST.BadRequest: error: C12=C(CC1NC(=O)C=CC(C(SC)=CC2)=O)C(OC)=C(C(OC)=C)OC  
PUGREST.BadRequest: error:  
C1=C(C(OC(=O)C)=C2C(OC)=C1)OCC=3C([C@H1](CC2)NC(=O)C)=CC(=O)C(O)=CC=3  
PUGREST.BadRequest: error:  
CC(=O)OC1=CC=C2C3=C(C(OC)=C(C=C3CC[C@@H1](C2=CC1=O)NC(=O)CO)CO)C  
PUGREST.BadRequest: error:  
C12C(=O)C(=C3C=C1C4=C(CC[C@@H1]3NC(C)=O)C=C(OC)C(=C4OC)OC=C2SC)OC(=O)C  
PUGREST.BadRequest: error:  
C12C(=O)C2=C3C=C1C4=C(CC[C@@H1]3NC(C)=O)C=C(OC)C(OC)=C4OC(OC)=O  
PUGREST.BadRequest: error:  
C12C(=O)C(=CC=C1C3=C(CC[C@@H1]2NC(C)=O)C=C(OC)C(=C3OC)OC(OC)=O)SC  
PUGREST.BadRequest: error:  
CC(=O)OC=1C(=O)C=C2C(=CC=1)C3=C(OC)C(OC)=C(C=C3CC[C@@H1]2NC(C)=O)C(=O)C  
PUGREST.BadRequest: error:  
C12C(=O)C=C3C=C1C4=C(CC[C@@H1]3NC(C)=O)C=C(OC)C(=C4OC(OC)=O)OC=C2  
PUGREST.BadRequest: error:  
C12C(=O)C(=CC=C1C3=C(CC[C@@H1]2NC(C)=O)C=C(OC)C(OC)=C3OC(OC)=O)SC  
PUGREST.BadRequest: error:  
CC(=O)OC1=CC=C2C3=C(C(OC)=C(C=C3CC[C@@H1](C2=CC1=O)NC(=O)C)OC)OC(=O)C  
PUGREST.BadRequest: error:  
C1C(=O)C(=C2C=C1C3=C(CC[C@@H1]2NC(C)=O)C=C(OC)C(OC)=C3OC(OC)=O)SC



PUGREST.BadRequest: error:  
C=1C(=O)C(OC(=O)CC)=CC=CC2=C(C3=C(OC)C(OC)=C2OC)CC[C@H1](NC(=O)C)C3=1  
PUGREST.BadRequest: error:  
C1C(=O)OC2C=CC=CC(=C2)[C@@H1](NC(=O)C)CCC3=CC(OC)=C(OC)C(=C3)OC=C1  
PUGREST.BadRequest: error:  
C=12C=3C(=CC(=O)C(SC)=CC=3)[C@H1]CCC=1C=C(OC)C(=C2OC)OCNC(C)=O  
PUGREST.BadRequest: error:  
CCC(=O)OC1=CC=C2C3=C(C(OC)=C(C=C3CC[C@@H1](C2=CC1=O)OC(=O)C)OC)OC  
PUGREST.BadRequest: error:  
CCC(=O)N[C@H1]1CCC2=CC(=C(OC)C(OC)=C2C=3C1=CC(=O)C(=CC=3)OC(OC)=O)OC  
PUGREST.BadRequest: error:  
CCC(=O)OCC(C=C1C(=C)C2=C(OC)C(=C(C=C2CC[C@@H1]1N)CC)OO)COC=CO  
PUGREST.BadRequest: error:  
CC(C)C1(OC=C2C3=CC=C(C(C=C3[C@H1](CCC2=CC(=C1OC)OC)NCC)=O)O)OC=O  
PUGREST.BadRequest: error:  
CC(C)C(OC1=CC=C2C3=C(CC[C@@H1](C2=CC1=O)NC(C)=O)C=C(OC)C(OC)=C3OC)(O)C=O  
PUGREST.BadRequest: error:  
CC(C)C1(OC=CC2=CC=C(C(C=C2[C@H1](CCC=CC(=C1OC)OC)NCC)=O)O)OC=O  
PUGREST.BadRequest: error:  
CC(C)C(OC1=CC=C2C3=C(CC[C@@H1](C2=CC1=O)NC(C)=O)C=C(OC)C(OC)=C3OC=O)C  
PUGREST.BadRequest: error:  
CC(C)C(=O)OC1=CC=C2C3=C(C(OC)=C(C=C3CC[C@@H1](C2=CC1=O)NC(C)=O)OC)OC(=O)C  
PUGREST.BadRequest: error:  
CC(C)C(OC1=CC=C2C3=C(C=C(OC)C(OC)=C3OC)CC[C@@H1](C2=CC1=O)NC(=O)CC)(O)C  
PUGREST.BadRequest: error:  
CC(=O)N[C@H1]CCC1=CC(OC)=C(OC)C(=C1C2=CC=C(SC)C(=O)C=C2)CC=C  
PUGREST.BadRequest: error:  
CC(=O)N[C@@H1]1C2=CC(C(SC)=CC=C2C3=C(OC)C(=C(OC)C=C3CC1)OC(=O)C=CC=CC=C)O  
PUGREST.BadRequest: error:  
C12=C(C(=C(OC)C(OC)=C1)OC(C)=O)CC([C@H1](CC2)NC(C)=O)=CC(C(SC)=CC)=O  
PUGREST.BadRequest: error:  
CC(=O)OCC1=CN(N=N1)[C@H1]2CCC3=CC(OC)=C(OC)C(OC)=C3C=4C2=CC(=O)C(=CC=4)NCC  
PUGREST.BadRequest: error:  
C1=C(C2=C(OC)C(OC)=C1OC(=O)CCC)C[C@@H1](C3=CC(=O)C(SC)=CC=C32)NC(C)=O  
PUGREST.BadRequest: error:  
CC(=O)N[C@H1]1CCC2=CC(OC)=C(OC)C(=C2C3=CC=C(C(C=C31)=O)OCC4=CC=CC=C4)OOC  
PUGREST.BadRequest: error:  
O=C(OC)OC=C(OC)C(=C1C(CC[C@@H1](C2=CC(C(=CC=C12)SC)=O)N=C)O)C  
PUGREST.BadRequest: error:  
O=C(OC1)OC=C2C3=CC=C(C(C=C3[C@H1](CCC2=CC(=C1OC)OC)NCC)=O)OOC  
PUGREST.BadRequest: error:  
O=C(OC)OCC(=O)C=C1C(C2=C(C(OC)=C(C=C2CC[C@@H1]1NC(=O)C)OC)OC)(O)CC  
PUGREST.BadRequest: error:  
O=C(OC)OC1=C2C3=CC=C(C(C=C3[C@H1](CCC2=CC(OC)=C1O)CNC=O)C)OOC(=O)C  
PUGREST.BadRequest: error:  
O=C(OC)OC1=CC=C2C3=C(C(OC)=C(C=C3CC[C@@H1](C2=CC1=O)OC(=O)C)NC)CC=O  
PUGREST.BadRequest: error:  
O=C(OC)OC=CC=C1C([C@@H1](NC(=O)C)CCC2=CC(=C(OC)C(OC)=C21)O)C=CC=O

PUGREST.BadRequest: error:  
O=C(OC)OC=CC=C1C2=C(C(OC)=C(C=C2CC[C@@H1](C1=CC=O)NC(=O)C)OC)C(=O)C

PUGREST.BadRequest: error:  
O=C(OC)OC1=CC=C2C3=C(C(OC)=C(C=C3CC[C@@H1](C2=CC1=O)OC(=O)O)CO)SC

PUGREST.BadRequest: error:  
O=C(OC1)OC=C2C3=CC=C(C(C=C3[C@H1](CCC2=CC(=C1OC)OC)NC=O)C)OOC

PUGREST.BadRequest: error:  
O=C(OC)OC=1C(C=C2C(=CC=1)C3=C(OC)C(=C(OC)C=C3CC[C@@H1]2NC(=O)C)O)C=O

PUGREST.BadRequest: error:  
O=C(OC)OCC(C=C1C(C2=C(C=C(OC)C(OC)=C2OC)CC[C@@H1]1NC(C)=O)=CC)=O

PUGREST.BadRequest: error:  
O=C(C)N[C@H1]1CCC2=CC(=C(OC)C(=C2C=3C1=CC(C(=CC=3)OC(=O)OC)=O)CN)C(=O)COCC

PUGREST.BadRequest: error:  
O=C(C)N[C@@H1]1CC(C2=C(C(=C(OC)C=C2CC1)OC)OC)C=C(SC)C(C)=O

PUGREST.BadRequest: error:  
O=C(C(C)C)OC1=C2C3=CC=C(C(C=C3[C@H1](CCC2=CC(OC)=C1O)CNCC)=O)OOC

PUGREST.BadRequest: error:  
O=C(C)N[C@@H1]1CC2(C3=C(C(=C(OC)C=C3CC1)OC)OC)C=C(OC)C(C2)=O

PUGREST.BadRequest: error:  
O=C(C)N[C@H1]1CCC2=CC(=C(OC)C(=C2C=3C1=CC(C(=CC=3)OC)O)COC(=O)OC)NC(=O)C=O

PUGREST.BadRequest: error:  
O=C(CC)OC1=C2CC([C@@H1](NC(C)=O)CCC2=CC(=C1OC)OC)=CC(C(=CC)SC)=O

PUGREST.BadRequest: error:  
O=C(C)N[C@H1]1CCC2=CC(=C(OC)C(=C2C=3C1=CC(C(=CC=3)OC(OC)=O)=O)CC)OOC

PUGREST.BadRequest: error:  
O=C(C)N[C@H1]1CCC2=CC(=C(OC)C(=C2C=3C1=CC(C(=CC=3)OC)O)C0OC0C)C=O

PUGREST.BadRequest: error:  
CC(=O)N[C@H1]C1CC2=CC(OC)=C(OC)C(OC)=C2C3=CC=C(C(=O)C=C31)OC

PUGREST.BadRequest: error:  
CC(=O)C1=CC=C(SC)C(C=C1[C@H1]CCC=CC(OC)=COC)NC(=O)CSC

PUGREST.BadRequest: error:  
C=1C(=O)C2=C(C3=CC=C(SC)C(C=C3[C@H1](CC2)NC=O)COC)C(OC)C=1

PUGREST.BadRequest: error:  
CC(=O)N[C@H1]C1CC2=CC(OC)=C(OC)C(OC)=C2C3=CC=C(C(=O)C=C31)O

PUGREST.BadRequest: error:  
C1C(=O)C=C(C2=CC=C(SC)C(C=C2[C@H1](NC(C)=O)C)COC)C(OC)C(=C1)SC

PUGREST.BadRequest: error: CC(=O)C=C(C1=CC2=C(SC)C(C=C1[C@H1](NC(C)=O)C)C)OC2OC

PUGREST.BadRequest: error: C12=C(C3=CC=C(SC)C(C=C3[C@@H1](N)CC1)=CCOC)C2OC=C

PUGREST.BadRequest: error:  
C=12C(=CC(C(SC)=CC=1)=O)[C@H1](CCC3=CC(OC)=C(OC)C(=C32)N)C

PUGREST.BadRequest: error:  
C=1C(=O)C(=CC=C2C3=C(OC)C(OC)=CC=C3CC[C@@H1](C2=1)NC=O)COC

PUGREST.BadRequest: error:  
C=1C(=O)C(OC(=O)C)=CC=C2C3=C(OC)C(=C(OC)C=C3CC[C@@H1](C2=1)OCNC=O)C

PUGREST.BadRequest: error:  
C=12C(=O)C(=CC=C3C=1[C@H1](CCC4=CC(OC)=C(OC)C(OC)=C34)NCC)OC2

PUGREST.BadRequest: error:  
CC(=O)OC1=C2C3=CC=C(SC)C(=O)C=C3[C@H1](CCC2=C(OC)C=C1)OCNC(C)=O

PUGREST.BadRequest: error:  
C=12C(=O)C(=CC=C3C=1[C@H1])(CCC4=CC(OC)=C(OC)C(OC)=C34)NC(C)=O)C2  
PUGREST.BadRequest: error:  
C1=C(C(O)=CC=C1CC([C@@H1])(NC(=O)C)CC)=CCC(=CC)SC)OOC(=O)CCOC  
PUGREST.BadRequest: error:  
CCC(=O)OC=C1C2=CC=C(SC)C(=O)C=C2[C@H1](CCC1=C(OC)C=C)OCOC(=O)OC  
PUGREST.BadRequest: error:  
C=1C=C(OC(=O)OC)C(C=C2C=1C3=C(OC)C(=C(OC)C=C3CC[C@@H1]2NC)C)C=O  
PUGREST.BadRequest: error:  
CCC(=O)OC=CC=C1C([C@@H1])(NC(C)=O)CCC2=CC(OC)=CC(OC)=C21)OC=CC=O  
PUGREST.BadRequest: error:  
CCC(=O)OC=C1C2=CC=C(SC)C(=O)C=C2[C@H1](CCC1=C(OC)C=C)OCOCNC(=O)C  
PUGREST.BadRequest: error:  
C=1C=C(OC(=O)OC)C2(C=CC=1C3=C(OC)C(=C(C(OC)=C3CC[C@@H1]2NC)C)O)COC=O  
PUGREST.BadRequest: error:  
C12C=C(C3=CC=C(SC)C(=O)C=C3[C@@H1])(NC(=O)C)C1)C(=C(OC)C(OC)=C2)OC  
PUGREST.BadRequest: error:  
CCC(=O)N[C@H1]1CCC2=C(C(OC)=C(C(OC)=C2)OC)C=3C1=CC(C(SC)=CC=3)=O  
PUGREST.BadRequest: error:  
CCC(=O)OC=C1C2=CC=C(SC)C(=O)C=C2[C@@H1](NC(=O)C)CCC1=CC(OC)=COC  
PUGREST.BadRequest: error: C1C=C1C2=CC=C(SC)C(=O)C=C2[C@H1]  
PUGREST.BadRequest: error:  
C=1C=C(OC(=O)OC)C(C=C2C=1C3=C(OC)C(=C(C=C3CC[C@@H1]2NC(C)=O)OC)O)C=O  
PUGREST.BadRequest: error:  
CCC(=O)N[C@H1]1CCC2=CC(OC)=C(C(OC)=C2C=3C1=CC(=O)C(=CC=3)SC)OC(=O)OCC  
PUGREST.BadRequest: error:  
C12C=C(CC[C@H1])(NC(=O)C)C1=CC(C(=CC)SC)=O)C=C(OC)C(OC)=C2OC  
PUGREST.BadRequest: error:  
CC=1C(=CC(C(=CC=1)SC)=O)[C@H1](CCC2=CC(OC)=C(OC)C(=C2)OC)NC(=O)C  
PUGREST.BadRequest: error:  
CC(C)COCCN[C@H1]1CCC2=CC(OC)=C(C(=C2C=3C1=CC(C(=CC=3)SC)=O)OC)OC(=O)C  
PUGREST.BadRequest: error:  
CC(C)CCN[C@H1]1CCC2=C(C3=CC=C(SC)C(C=C31)=O)C(=C(C(OC)=C2)OC)OCCC  
PUGREST.BadRequest: error:  
CC(C)CCN[C@H1]1CCC2=C(C3=CC=C(SC)C(C=C31)=O)C(=C(C(OC)=C2)OC)OC(=O)C  
PUGREST.BadRequest: error:  
CC(C)C(OC1=C2C3=CC=C(SC)C(=O)C=C3[C@H1])(CCC2=CC(OC)=C1OC)NC=O)C=O  
PUGREST.BadRequest: error:  
C1=C(OC)C(=C(OC)C2=C1CC[C@H1])(NC(=O)C)C=3C2=CC=C(OC(=O)OC)C(C=3)=O)C  
PUGREST.BadRequest: error:  
CC(C)CCN[C@H1]1CCC2=C(C3=CC=C(SC)C(C=C13)=O)C(=C(C(OC)=C2)OC)OCCC  
PUGREST.BadRequest: error:  
CC(=O)N1[C@H1]CCC2=CC(OC)=C(OC)C(OC(=O)C)=C2C=3C1=CC(C(=CC=3)SC=O)CC=O  
PUGREST.BadRequest: error:  
C=1C(=CC(C(SC)=CC=1)=O)[C@H1](CCC=CC(OC(=O)C(C)C=COC)C(=C)OCNC=O)CSC  
PUGREST.BadRequest: error:  
C12=C(C=C(OC)C(OC)=C1OC(=O)C3=CC)CC=C3C=CC=C(CC2O[C@@H1]NC(C)=O)C  
PUGREST.BadRequest: error:

O=C(OC1)OC=CC=C2C3=C(OC)C(=C(OC)C=C3CC[C@@H1](NC(C)=O)C2=CC1)OO  
PUGREST.BadRequest: error:  
O=C(OC)OC1=CC=C2C3=C(OC)C(=C(OC)C=C3CC[C@@H1](C2=CC1=O)NC=O)COC  
PUGREST.BadRequest: error:  
O=C(OC1)OC=CC=C2C3=C(OC)C(=C(OC)C=C3CC[C@H1](NC(=O)C)C2=CC1)OO  
PUGREST.BadRequest: error:  
O=C(OC)OC1=CC=C2C3=C(OC)C(=C(OC)C=C3CC[C@@H1](C2=CC1=O)NCC)OOC  
PUGREST.BadRequest: error:  
O=C(CC1)OC=CC=C2C3=C(OC)C(=C(OC)C=C3CC[C@H1](NC(=O)C)C2=CC1)OOC  
PUGREST.BadRequest: error:  
O=C(C)N[C@H1]1CCC2=CC(OC)=C(C(OC)=C2C3=CC=C(C(=O)C=C13)OCCC)OOC  
PUGREST.BadRequest: error:  
O=C(C)N[C@H1]C1=CC(C(OC(OCC)=O)=CC=C1C2=C(OC)C=C(OC)C=C2CC)OC=O  
PUGREST.BadRequest: error:  
O=C(C)N[C@H1]CC1C2=CC(OC)=CC(OC)=C2C=CC=C(OC(=O)OCC)C(=O)C=C1  
PUGREST.BadRequest: error:  
O=C(NC)NCC=CN(C=1OCC)CN(OCCC)CC=CC2=C(OC)C(=C(OC)C=C2CC[C@H1](NC(=O)C)OC=1)C=O  
PUGREST.BadRequest: error:  
O=C(N(C)C)NC1=CC=C2C3=C(OC)C(=C(OC)C=C3CC[C@@H1](C2=CC1=O)NCC)OOC  
PUGREST.BadRequest: error:  
O=C(C)N[C@H1]1CCC=C(C2=CC=C(SC)C(C=C12)=O)C(OC(CC)=O)=C(C(OC)=C)OC  
PUGREST.BadRequest: error:  
O=C(N)N[C@H1]1CCC2=CC(OC)=C(C(OC)=C2C=3C1=CC(C(OC(=O)C)=CC=3)=O)OC  
PUGREST.BadRequest: error:  
O=C(C)N[C@H1]1CCC2=CC(OC)=C(C(OC)=C2C3=CC=C(C(=O)C=C31)OC(=O)O)CCOC  
PUGREST.BadRequest: error:  
O=C(C)N[C@H1]1CCC2=CC(OC)=C(C(OC)=C2C=3C1=CC(C(OC(=O)CC)=CC=3)O)C=O  
PUGREST.BadRequest: error:  
O=C(N)N[C@H1]1CCC2=CC(OC)=C(C(OC)=C2C3=CC=C(C(C=C31)=O)O)C(=O)OCNC  
PUGREST.BadRequest: error:  
CC(=O)N1[C@H1]CCC2=CC(OC)=C(OC)C(OC)=C2C3=CC=C(NC)C(C=C31)=O  
PUGREST.BadRequest: error:  
C=1C(=CC=C(C2=O)OCC[C@H1]CCC3=CC(OC)=C(OC)C(OC)=C3C2)CC=1SC  
PUGREST.BadRequest: error:  
C1C(=O)OCC2=CC=CC3=C(OC)C(OC)=C(OC)C=C3CC[C@H1](NC(C)=O)C2=CC1=O  
PUGREST.BadRequest: error:  
CC(=O)OCC=CC=C1C2=C(OC)C(OC)=C(OC)C=C2CC[C@H1](NC(C)=O)C1=CSC  
PUGREST.BadRequest: error:  
CC(=O)N1[C@@H1]C2=CC(C(NC)=CC=C2C3=C(C(OC)=C(OC)C=C3CC1)OC)NC=O  
PUGREST.BadRequest: error:  
CC(=O)OC=CC=C1C2=C(OC)C(OC)=C(OC)C=C2CC[C@H1](NC(C)=O)C1=CCSC=O  
PUGREST.BadRequest: error:  
CC(=O)N[C@H1]C1CC2=CC(OC)=C(OC)C(OC)=C2C3=CC=C(SC)C(C=C31)=O  
PUGREST.BadRequest: error:  
C12=C(C=3C([C@H1]))(C4C1)N=C(C1)C=C4CCC(SC)=CC=3)OC=C2OCNC  
PUGREST.BadRequest: error: C10C=C2C3=CC=C(NC)C(=O)C=C3[C@H1](CCC2=CC(OC)=C10C)N  
PUGREST.BadRequest: error: CNCCC=C1C(C2=C(OC)C(OC)=CC=C2CC[C@@H1]1NOC)=O  
PUGREST.BadRequest: error: C10C=CC2=C(CC(O)CC1=CC=C3C(OC)=C(OC)C)P=C3C2OCSC

PUGREST.BadRequest: error: CCCC=CC=CC1=C(OC)C=C(C=C1CC[C@@H1]NC(N)=NOCOC)O  
 PUGREST.BadRequest: error: C1OC=C2CC([C@@H1](N)CCC2=CC(OC)=C1OC=CC)(C(=CC)SC)O  
 PUGREST.BadRequest: error:  
 COC1=C2C3=CC=C(NC)C(=O)C=C3[C@H1](CCC2=CC(OC)=C1OC)NO  
 PUGREST.BadRequest: error:  
 C=C1CC2[C@H1](CCC3=C(C(OC)=C(OC)C(=C3)OC)C2)CC=C1N=[N+1]=[N-1]  
 PUGREST.BadRequest: error:  
 C=1NCC(C=C2C(C3=C(OC)C=C(C=C3CC[C@@H1]2N=[N+1]=[N-1])OC)OC=C)C=1O  
 PUGREST.BadRequest: error: COC=C1C2=CC=C(NC)C(=O)C=C2[C@H1](CCC1C=COC)N3N=NC=C3  
 PUGREST.BadRequest: error:  
 COC=C1C2=CC=C(SC)C(=O)C=C2[C@@H1](NCCCCCCCC)CCC1=CC(=COC)SC  
 PUGREST.BadRequest: error:  
 COC=C1C2=CC=C(NC)C(=O)C=C2[C@@H1](N=[N+1]=[N-1])CCC1=CC(=COC)OC  
 PUGREST.BadRequest: error:  
 C1OC=CC2=C(C3=C(OC)C(OC)=CC=C3CC[C@@H1]2N=[N+1]=[N-1])CC=C1NC  
 PUGREST.BadRequest: error:  
 C=CCC1[C@H1](CC=[N+1]C2=C(C(OC)=C(OC)C=C2C1O)C=O)[N-1]CCC  
 PUGREST.BadRequest: error:  
 C=12[C@@H1](C=CC(=O)C(C)=CC=1C3=C(CC2)C=C(OC)C(OC)=C3OCNC)CNC=C  
 PUGREST.BadRequest: error:  
 C1[C@@H1](C2=CC(=O)C(SC)=CC=C2C3=C(C=C(OC)C(=C3OC)OC)C1N)CCNC  
 PUGREST.BadRequest: error:  
 COC1=C(OC)C(OC)=C2CCC[C@H1](N3C=CN=N3)C4=CC(=O)C(=CC=C4C21)NC  
 PUGREST.BadRequest: error:  
 C12=CC(C(=CC=C1C3=C(C=C(OC)C(OC)=C3OC)CC[C@@H1]2NCCO)C)NC  
 PUGREST.BadRequest: error:  
 C1[C@@H1](C2=CC(=O)C(NC)=CC=C2C3=C(C=C(OC)C(=C3OC)OC)C1)NCCSC  
 PUGREST.BadRequest: error:  
 N(C1=CC=C2C3=C(CC[C@@H1](C2=CC1=O)N4C=CN=N4)C=C(OC)C(OC)=C3O)CC  
 PUGREST.BadRequest: error:  
 C=1=C2C([C@H1](CCC3=CC(=C(OC)C(=C32)OC)OC)NCCCCC)CC=CC(C(=C)SC)=O  
 PUGREST.BadRequest: error:  
 N1C(COC(=O)OC=CN1[C@@H1]2)C3=CC(=O)C(NC)=CC=C3C4=C(CC2)C=C(C(OC)=C4OC)OC  
 PUGREST.BadRequest: error:  
 N1C(COC(=O)OC=CN1[C@@H1]2)C3=CC(=O)C(NC)=CC=C3C4=C(CC2)C=C(C(=C4OC)OC)OC  
 PUGREST.BadRequest: error:  
 CNC(C(C)O)N[C@@H1]1CC(C2=C(C(=C(OC)C=C2CC1)OC)OC)=CC=C(NC)C(C)=O  
 PUGREST.BadRequest: error:  
 C=C1C([C@H1](CCC2=CC(=C(OC)C(=C21)OC)OC)NCCCCC)CC=CC(C(=C)SC)=O  
 PUGREST.BadRequest: error:  
 COC1=C(OC)C(=CC=2CC[C@@H1](C3=CC(C(=CC=C3C=21)NC)=O)N4C=C(N=N4)CCC)NCOC  
 PUGREST.BadRequest: error:  
 CNC(C(C)O)ON(C=1C(C=C2C(=CC=1)C3=C(OC)C=C(C=C3CC[C@@H1]2NCC)CC)O)COC=O  
 PUGREST.BadRequest: error:  
 C1=C2C(C3=C(C=C(OC)C(=C3OC)OC)CC[C@@H1]2N4C=C(N=N4)CCCC=C)C=C(NC)C1=O  
 PUGREST.BadRequest: error:  
 CNC(C(C)O)N([C@H1]1CCC2=CC(=C(OC)C(OC)=C2C=3C1=CC(=O)C(=CC=3)NC)OCC)C  
 PUGREST.BadRequest: error:

CNC(C(C)O)N[C@@H1]1C=2C(C3=C(C=C(OC)C(OC)=C3OC)CC1)=CC=C(C(=O)C=2)NC  
PUGREST.BadRequest: error:  
C=C1C(C2=C(C=C(OC)C(=C2OC)OC)CC[C@@H1]1NCCCCCCCCCCCC)=CC=C(SC)C=O  
PUGREST.BadRequest: error:  
CNC(=S)N[C@@H1]1C2=CC(=O)C(NC)=CC=C2C3=C(OC)C(=C(C=C3CC1)OC)OCO  
PUGREST.BadRequest: error:  
C1=2C3=C(C(=C(C=C3CC[C@@H1](NCCCCCCCC)C1=CCC(=CC=2)NC)OO)CO)COC  
PUGREST.BadRequest: error:  
C12=CC(C(NC)=CC=C1C3=C(C=C(C(OC)=C3OC)OC)CC[C@@H1]2N4C=C(N=N4)COO)NC  
PUGREST.BadRequest: error:  
N([C@H1]1CCC2=C(C3=CC=C(C(C=C13)=O)NC)C(OC)=C(OC)C(OC)=C2)N=N  
PUGREST.BadRequest: error:  
COC=C(OC)C(OC)=C1CCC[C@@H1](C2=CC(=O)C(NC)=CC=C12)NCCCCC  
PUGREST.BadRequest: error:  
C=C1C([C@H1](CCC2=CC(=C(OC)C(=C21)OC)OC)N3N=NC=C3)CC1  
PUGREST.BadRequest: error:  
COC=C(OC)C(OC)=C1CCC[C@@H1](C2=CC(=O)C(SC)=CC=C12)NCCCCCCCC  
PUGREST.BadRequest: error:  
COC=C(OC)C(OC)=C1CCC[C@@H1](C2=CC(=O)C(NC)=CC=C12)NCCCCCCCC  
PUGREST.BadRequest: error:  
C12C3=CC(OC)=C(OC)C=C3CC([C@H1]1NCCCCCCCC)=CC(=C2OC)OC  
PUGREST.BadRequest: error:  
C12=CC(C(NC)=CC=C1C3=C(C=C(C(OC)=C3OC)OC)CC[C@@H1]2NCCCCCCCCCF)=O  
PUGREST.BadRequest: error:  
C12=CC(C(NC)=CC=C1C3=C(C=C(C(OC)=C3OC)OC)CC[C@@H1]2N4C=C(N=N4)CC1)NC  
PUGREST.BadRequest: error:  
C1=C2C(C3=CC=C(C(=O)C=C3[C@@H1](CC2)NCCC4=CC=CC=C4)OS)CC(OC)=C(OC)C(=C1)OC  
PUGREST.BadRequest: error:  
COC1=C(OC)C(OC)=CC=2CC[C@@H1](C3=CC(=O)C(NC)=CC=C3C=21)NCCC4=CC=CC=C4NC  
PUGREST.BadRequest: error:  
C1[C@@H1](C2=CC(=O)C(SC)=CC=C2C3=C(C(=C(OC)C=C3C1)OC)OC)NCCC=CC=CC  
PUGREST.BadRequest: error:  
CNC(C(C)C)N[C@@H1]1C2=CC(=O)C(NC)=CC=C2C3=C(C(=C(OC)C=C3CC1)OC)OC  
PUGREST.BadRequest: error:  
C=C1C([C@H1](CCC2=CC(=C(OC)C(=C21)OC)OC)NCCCC=C)C(C(SC)=C)=O  
PUGREST.BadRequest: error:  
C=C1C([C@H1](CCC2=CC(=C(OC)C(=C21)OC)OC)NCCCCC)C=CC(C(SC)=C)=O  
PUGREST.BadRequest: error:  
COC1=C(OC)C(OC)=CC=2CC[C@@H1](C3=CC(=O)C(NC)=CC=C3C=21)N4C=C(N=N4)CCONC  
PUGREST.BadRequest: error:  
C12=CC(C(NC)=CC=C1C3=C(C=C(C(OC)=C3OC)OC)CC[C@@H1]2N4C=C(N=N4)CCC)C1  
PUGREST.BadRequest: error:  
CN(C(=S)N[C@@H1]1C2=CC(=O)C(NC)=CC=C2C3=C(C(=C(OC)C=C3CC1)OC)OC)CC#N  
PUGREST.BadRequest: error:  
C1OC=C(OC)C(OC)=C2C1CC[C@@H1](C3=CC(=O)C(NC)=CC=C23)NCCCCCCCC=C  
PUGREST.BadRequest: error:  
C[C@H1](OCCC)CCC1=C(OC)C(OC)=C(OC)C=C1CC=CC=CC(=O)CSCN  
PUGREST.BadRequest: error:

CC(C)(C)OC1=CN(N=N1)[C@H1]C2CC3=CC(OC)=C(OC)C(OC)=C3C4=CC=C(NC)C(=O)C=C42  
PUGREST.BadRequest: error: C=C(OC)C1=C(OC)C=2C3=CC=C(SC)CC=C3[C@H1](CCC1=2)C=O  
PUGREST.BadRequest: error:  
CC(C)CCCCCN[C@@H1]1C2=CC(C(SC)=CC=C2C3=C(C(OC)=C(OC)C=C3CC1)OC)=O  
PUGREST.BadRequest: error:  
CC(C)(C)C(=O)N[C@@H1]1C=2C(C3=C(C(OC)=C(OC)C=C3CC1)OC)=CC=C(NC)C(=O)C=2  
PUGREST.BadRequest: error:  
C1=C(OC)C(OC=2)=C(OC)C3CC([C@H1](CCC3=C1)NC(C)=O)SC=CC=20SC  
PUGREST.BadRequest: error:  
C=CCCOCC(C=C1[C@H1](CCC2=CC(OC)=C(OC)C(OC)=C2C1=CCN)C(=O)C=O)SC=O  
PUGREST.BadRequest: error:  
OC(CCC(C)C)OCC1=CN(N=N1)[C@H1]CCC2=CC(OC)=C(OC)C(OC)=C2C3=CC=C(C(=O)C=C3)NC  
PUGREST.BadRequest: error:  
O=C(NCC1=CC=CC=C1C1)N[C@H1]2CCC3=C(C(OC)=C(OC)C(OC)=C3)C4=CC=C(NC)C(=O)C=C24  
PUGREST.BadRequest: error:  
N([C@H1]1CCC2=C(C(OC)=C(OC)C(OC)=C2)C3=CC=C(NC)C(C=C13)=O)C(O)=O  
PUGREST.BadRequest: error:  
O=CC=CCC=CN(C)[C@H1]1CCC2=CC(OC)=C(OC)C(OC)=C2C3=CC=C(NC)C(=O)C=C13)=O  
PUGREST.BadRequest: error:  
C12[C@H1]CC(C3=C(OC)C(OC)=C(OC)C=C3C1=CC=COC(OCC)=O)=C2SC=CC=O  
PUGREST.BadRequest: error:  
OC(CCC1(C)C)OC=C(C(OC)=C2CCC[C@H1](NC(C)=O)C3=CCC(SC)=CC=C3C21)O  
PUGREST.BadRequest: error:  
OC(CCC1(C)C)OC=C(C(OC=2)=CCCC[C@H1](NC(C)=O)C3=CCC(SC)=CC=C3C=21)O  
PUGREST.BadRequest: error:  
O=C(C(=O)OCC)C1OC=CC=CC2=C(OC)C(OC)=C(OC)C=C2CC[C@H1](NC(=O)C)C=CC1=O  
PUGREST.BadRequest: error:  
C=CCC(=O)OCCC=C1[C@H1](CCC2=C(C(OC)=C(OC)C(OC)=C2)C1=C)N=O  
PUGREST.BadRequest: error:  
C12[C@H1]CC(C3=C(OC)C(OC)=C(OC)C=C3C1=CC=C(SC)C)(C=C2)ONC(=O)C  
PUGREST.BadRequest: error:  
C=C1C(C2=CC=C(C(=O)C=C2[C@@H1](NCCCCCCCCCCC)CC1)COC)C(OC)=COCOC  
PUGREST.BadRequest: error:  
C=1N([C@H1]2CCC3=C(C4=CC=C(C(C=C24)=O)NC)C(OC)=C(OC)C(=C3)OC)N=NC=1C  
PUGREST.BadRequest: error:  
C1=C2C(C3=CC=C(C(=O)C=C3[C@H1](CC2)N4C=C(N=N4)CC(C1)C1)ONC)C(OC)=C(OC)C(=C1)OC  
PUGREST.BadRequest: error:  
C1=C2C(C3=CC=C(C(=O)C=C3[C@H1](CC2)N4C=C(N=N4)C=CC=CC=N)C=C)OCNC(OC)=C1OC  
PUGREST.BadRequest: error:  
C=1N([C@H1]2CCC3=C(C(=C(OC)C(OC)=C3)OC)C=4C2=CC(C(=CC=4)NC)=O)N=NC=1C  
PUGREST.BadRequest: error:  
C=C1C(C2=CC=C(C(=O)C=C2[C@H1](CC1)N3C=C(N=N3)C=CC=CC=N)C=C)OCNCOCOC  
PUGREST.BadRequest: error:  
C1C2=CC(OC)=C(OC)C(=C2CC([C@H1](C1)NC/C=C/C3=CC=CC=C3)=CC(=O)C(=CC)SC)C  
PUGREST.BadRequest: error:  
C1=C2C(C3=CC=CC(=O)C=C3[C@H1](CC2)N4C=C(N=N4)C=CC=CC=C(OC)C(OC)=C1OCNC  
PUGREST.BadRequest: error:  
C=CC=CC(=O)OCCC=C1[C@H1](CCC2=CC(OC)=C(OC)C(OC)=C2C1=CN)OSCC

PUGREST.BadRequest: error:  
N1=CC=C(C=C1)C(OC=CC=C2C3=C(OC)C(OC)=C(OC)C=C3CC[C@@H1](C2=CC=O)NC(=O)CSC)=O  
PUGREST.BadRequest: error:  
C=[C@H1]C1=CCC(OC(C2=CC=CC=C2)=O)=CC=C1C3=C(OC)C(OC)=C(OC)C=C3CC  
PUGREST.BadRequest: error:  
OC1=C(C=CC=C1)C=2N=NN(C=2)[C@H1]C3CC4=CC(OC)=C(OC)C(OC)=C4C5=CC=C(NC)C(=O)C=C53  
PUGREST.BadRequest: error:  
C12=CC=C(S1=C3)C(=O)C=C2[C@H1](CCC=CC(OC)=C(OC)C(OC)=C3)NC(C)=O  
PUGREST.BadRequest: error:  
OC=C(SC)C(C(OC=1)=CCC2([C@H1](NC(C)C)C=CCC2=CC=C=1)NC=O)NCOC  
PUGREST.BadRequest: error:  
OC1=C(C=CC=C1)C=2N=NN(C=2)[C@H1]CCC3=CC(OC)=C(OC)C(OC)=C3C4=CC=C(NC)C(=O)C=C4  
PUGREST.BadRequest: error:  
CNCC(O)(C1OC=CC=C1CN[C@@H1]2C3=C)C(C(NC)=CC=C3C4=C(C(OC)=C(OC)C=C4CC2)OC)=O  
PUGREST.BadRequest: error:  
C=CC1=C(COC2=CC(CC[C@H1](NC(C)=O)C3=CC(C(SC)=CC=C32)=C)C(OC)=C1OOC)OC  
PUGREST.BadRequest: error:  
C=CC=CCOC=CC=C1C([C@H1](CCC2=CC(OC)=C(OC)C(OC)=C21)NC(=O)C)=O  
PUGREST.BadRequest: error:  
C1[C@@H1](C2=CC(=O)C(NC)=CC=C2C3=C(C(=C(OC)C=C3C1)OC)OC)N4C=C(N=N4)COC  
PUGREST.BadRequest: error:  
C=1N([C@H1]2CCC3=C(C(=C(OC)C(OC)=C3)OC)C=4C2=CC(=O)C(=CC=4)NC)N=NC=1C  
PUGREST.BadRequest: error:  
NC(C1OC(=O)OC=CN1[C@@H1]2)C3=CC(C(=CC=C3C4=C(CC2)C=C(C(OC)=C4OC)OC)NC)=O  
PUGREST.BadRequest: error:  
C=C1C(C2=CC=C(C(=O)C=C2[C@H1](CC1)N3C=C(N=N3)COC4=CC=CC=C4)COC)C(OC)=COCNC  
PUGREST.BadRequest: error:  
C1=CC(C2=CC=C(C(=O)C=C2[C@@H1](N3C=C(N=N3)C4=NC=CC=C4)C1N)C=C(OC)C(OC)=COC  
PUGREST.BadRequest: error:  
C1=C2C(C3=CC=C(C(C=C3[C@H1](CC2)N4C=C(N=N4)C5=CC=CC=N5)N)C=C(C(=C1OC)OC)OC  
PUGREST.BadRequest: error:  
C=1N([C@H1]2CCC=C(C3=CC=C(C(C=C23)=O)NC)C(OC)=C(OC)C(=C)OC)N=NC=1C(=O)OC  
PUGREST.BadRequest: error:  
O1CC=CC=C1CN[C@H1]2CCC3=CC(OC)=C(OC)C(OC)=C3C4=CC=C(NC)C(C=C24)=O  
PUGREST.BadRequest: error:  
O=C(OCC)CN(OCC)C(CN[C@@H1]1C2=CCC(NC)=CC3=C2C=C(CC1)C=C(OC)C(=C3OC)N)C=O  
PUGREST.BadRequest: error:  
O1CC=C2C=C1C3=C(OC)C(OC)=C(OC)C=C3CC[C@H1](CCCC=C2O)CN=CCSC  
PUGREST.BadRequest: error: OC=CC=CC1=C(C=C(OC)C(OC)=C1OC(OCC)=O)NC(C)=O  
PUGREST.BadRequest: error:  
O=C(C(C)C=1)OCCC=C2[C@H1](CCC3=CC(OC)=C(OC)C(OC)=C3C2=CC=1N)ONC  
PUGREST.BadRequest: error:  
O=C(OC(C)(C)C)N[C@H1]1CCC2=C(C(OC)=C(OC)C(OC)=C2)C3=CC=C(NC)C(=O)C=C13  
PUGREST.BadRequest: error:  
O=C(C(C)C=1)OCCC=C2[C@H1]CCC3=CC(OC)=C(OC)C(OC)=C3C2=CC=1N  
PUGREST.BadRequest: error:  
O=C(OCC)CN(OCC)C[C@@H1]1C2=CC(C(NC)=CC=C2C3=C(C(OC)=C(OC)C=C3CC1)OC)=O  
PUGREST.BadRequest: error:



O=C(C)OC1=CN(N=N1)[C@H1]2CCC3=CC(OC)=C(OC)C(OC)=C3C4=CC=C(NC)C(=O)C=C24  
 PUGREST.BadRequest: error:  
O=C(O)C=C(OC)CC=C1C(C2=C(OC)C(OC)=C(OC)C=C2CC[C@H1]1N=CCS)C=O  
 PUGREST.BadRequest: error:  
O=C(C)N[C@@H1]1C2=CCC(SC)=CC=C2C3=C(C(OC)=C(OC)C=C3CC1)OCSC=O  
 PUGREST.BadRequest: error:  
O=C(C)N[C@@H1]1C2=CCC(SC)=CC=C2C3=C(C(OC)=C(OC)C=C3CC1)OCSCOC=O  
 PUGREST.BadRequest: error:  
O=C(O)C=C(C(OC1C)=O)[C@H1]CCC2=CC(OC)=C(OC)C(OC)=C2C3=CC=C(SC)C(=O)C=C31  
 PUGREST.BadRequest: error:  
O=C(C)N[C@@H1]1C2=CCC(SC)=CC=C2C3=C(C(OC)=C(OC)C=C3CC1)OCOC=O  
 PUGREST.BadRequest: error:  
O=C(OC)CN(CCC)C[C@H1]C1CC2=CC(OC)=C(OC)C(OC)=C2C3=CC=C(SC)C(=O)C=C31  
 PUGREST.BadRequest: error:  
O=C(C(C)C=1)OCCC=C2[C@H1](CCC3=CC(OC)=C(OC)C(OC)=C3C2=CC=1)NSC=O  
 PUGREST.BadRequest: error:  
C1=C2CC(OC(C3=CC=CC=C3)=O)=CC=C1C4=C(OC)C(OC)=C(OC)C=C4CC[C@H1](NC(=O)C)C2=O  
 PUGREST.BadRequest: error:  
C1=CCC(OC(C2=CC=CC=C2)=O)=CC=C1C3=C(OC)C(OC)=C(OC)C=C3CC[C@H1](NC(=O)C)C=O  
 PUGREST.BadRequest: error:  
C1N([C@@H1]2C3=CCC(SC)=CC=C3C4=C(OC)C(OC)=C(C=C4CC2)OCN)C(C(O)=O)=C1O  
 PUGREST.BadRequest: error:  
C1=CC(C=C(C1(OC(C)=C=2)OC(=O)CCC=C3N=C4CNC)CC=C3C=2C(OC)=COC)C=C4NC=O  
 PUGREST.BadRequest: error:  
C1N([C@@H1]2C3=CCC(SC)=CC=C3C4=C(OC)C(OC)=C(C=C4CC2)OC=O)N(C(C)C)OC1  
 PUGREST.BadRequest: error:  
C1[C@@H1](C2=CCC(SC)=CC=C2C3=C(OC)C(OC)=C(C=C3C1)OC=O)NC(C(=O)O)=CNC  
 PUGREST.BadRequest: error:  
N1([C@@H1]CCC1=C2C=C(CNC)CC=C2C3=C(OC)C(OC)=C(OC)C=C3C)NC(C1)=O  
 PUGREST.BadRequest: error: OC(OC(C)CC12)=C(C(OC)=O)N=NN1[C@H1]3CCC4=CC(OC)=C(O  
C)C(OC)=C4C=CC=C(NC)C(=O)C=C32  
 PUGREST.BadRequest: error:  
C=C1C(C2=C(OC)C(OC)=C(OC)C=C2CC[C@H1]1NC(C(O)=O)=C(NCO)OC=CC=CC(=O)C)SCNC  
 PUGREST.BadRequest: error: O=C(C(C1)C1)NC(=O)N[C@H1]1CCC2=C(C(OC)=C(OC)C(OC)=C2  
)C3=CC=C(C(C=C31)=O)NCN(O)CCC=O  
 PUGREST.BadRequest: error: O=C(C(C1)C1)NC(=O)N[C@H1]1CCC2=C(C(OC)=C(OC)C(OC)=C2  
)C3=CC=C(C(C=C31)=O)NCC4=CC=CC=C4  
 PUGREST.BadRequest: error:  
O=C(C(C1)C1)NCC1=CN(N=N1)[C@H1]2CCC3=CC(OC)=C(OC)C(OC)=C3C4=CC=C(C(=O)C=C24)NCCO  
 PUGREST.BadRequest: error:  
O=C(OCCC)OCC1=CN(N=N1)[C@H1]2CCC3=CC(OC)=C(OC)C(OC)=C3C4=CC=C(C(=O)C=C24)NCCO  
 PUGREST.BadRequest: error:  
O(C=CC=CC1=C2C(OC)=C(OC)C=C1CC[C@H1](NC(N(CCO)CCO)=S)C2=CCCNC)ONCC  
 PUGREST.BadRequest: error: O=C(OCCC)OCC1=CN(N=N1)[C@H1]2CCC3=CC(OC)=C(OC)C(OC)=  
C3C4=CC=C(C(=O)C=C42)NCC(=O)C  
 PUGREST.BadRequest: error: O=C(OC=C)NCC1=CN(N=N1)[C@H1]2CCC3=CC(OC)=C(OC)C(OC)=  
=C3C4=CC=C(C(=O)C=C24)NCC(=O)C  
 PUGREST.BadRequest: error: O=C(C(C1)C1)NCC1=CN(N=N1)[C@H1]2CCC3=CC(OC)=C(OC)C(O

C)=C3C4=CC=C(C(=O)C=C24)NCC(=O)C  
 PUGREST.BadRequest: error: 0=C(C(C1)C1)N1C(=O)N[C@H1]2CCC3=C(C(OC)=C(OC)C(OC)=C3)C4=CC=C(C(C=C42)=O)NCC=CC=C1  
 PUGREST.BadRequest: error: 0=C(C(C1)C1)NCC1=CN(N=N1)[C@H1]2CCC3=CC(OC)=C(OC)C(=C3C=4C2=CC(C(NC)=CC=4)=O)OCCC1  
 PUGREST.BadRequest: error: 0=C(OC=C)NCC1=CN(N=N1)[C@H1]2CCC3=CC(OC)=C(OC)C(OC)=C3C4=CC=C(C(C=C24)=O)NCC(=O)C  
 PUGREST.BadRequest: error:  
 0=C(C)N[C@@H1]1CC(C2=C(C(OC)=C(OC)C=C2CC1)OCC3=CC=CC=C3)=O  
 PUGREST.BadRequest: error:  
 0=C(C)N[C@@H1]1C=2C(C3=C(C(OC)=C(OC)C=C3CC1)OC(C)=O)C=C(SC)C(C=2)=O  
 PUGREST.BadRequest: error:  
 0=C(C(C1)C1)NC(=O)N[C@H1]1CCC2=CC(OC)=C(OC)C(OC)=C2C3=CC=C(C(C=C31)=O)NCC(=O)O  
 PUGREST.BadRequest: error:  
 0=C(C(C)C)OCC(C=C1[C@H1])(CCC2=CC(OC)=C(OC)C(O)=C2C1=CC=CO)CSCC)=O  
 PUGREST.BadRequest: error:  
 0=C(OC)C1=CN(N=N1)[C@H1]2CCC3=CC(OC)=C(OC)C(OC)=C3C4=CC=C(C(C=C24)=O)NCC(=O)C  
 PUGREST.BadRequest: error:  
 0=C(C)N[C@@H1]1C=2C(C3=C(C(OC)=C(OC)C=C3CC1)CC=C(SC)C(C=2)ONC(C)=O  
 PUGREST.BadRequest: error:  
 0=C(O)CN(CCO)C(=O)N[C@H1]1CCC2=CC(OC)=C(OC)C(OC)=C2C3=CC=C(C(C=C13)=O)NCC  
 PUGREST.BadRequest: error:  
 0=C(OC)C=C(C(OC)=O)N[C@H1]1CCC2=CC(OC)=C(OC)C(OC)=C2C3=CC=C(C(C=C31)S)CC  
 PUGREST.BadRequest: error:  
 0=C(O)C=C(OC)C(C(NC)=CC=CC1=C(OC)C(OC)=C(OC)C=C1CC[C@@H1](C)NCC)=O  
 PUGREST.BadRequest: error:  
 0=C(OC(C)COC1=C)N(N=N1)[C@H1]2CCC3=CC(OC)=C(OC)C(OC)=C3C4=CC=C(C(=O)C=C24)NC  
 PUGREST.BadRequest: error:  
 0(C=CC=CC1=C(OC)C(OC)=CC=C1CC[C@H1](CC=COC(C2=CC=CC=C2)=O)C(OC)=C)OSC=O  
 PUGREST.BadRequest: error:  
 CCCCCCCCCCCCCC=1CCCCC(C=C2[C@H1])(CCC3=CC(OC)=C(OC)C(OC)=C3C2=CC=1N)C(=O)C(=O)SC  
 PUGREST.BadRequest: error:  
 CCCCCCCCCCCCCCCCCC=1OCC(C=C2[C@H1])(CCC3=CC(OC)=C(OC)C(OC)=C3C2=CC=1N)C(=O)C(=O)SC  
 PUGREST.BadRequest: error:  
 CC(C)OC(NCC1=CN(N=N1)[C@H1]2CCC3=CC(OC)=C(OC)C(OC)=C3C4=CC=CC(C=C24)=O)NC=O  
 PUGREST.BadRequest: error:  
 C1=C(OC)C(OC)=C(OC)C=C1CC[C@@H1](C2=CC(C(OC(C3=CC=CC=C3)=O)=CC=C2)N)C=O  
 PUGREST.BadRequest: error:  
 OC1=C(OC)C(OC)=CC=C1C2=CC=C(NC)CC=C2[C@@H1](NC(C(C)C)=O)NCC  
 PUGREST.BadRequest: error:  
 C1=C(OC2)C=C(OC)C=C1CC[C@H1](NC(C(OC)=O)=C(NCO)OOC3=CCC(NC)=CC=C23)OOC  
 PUGREST.BadRequest: error:  
 C12=C(OC)C(OC)=C(OC)C=C1CC[C@H1](NC2(C(O)=O)CC=CCC(NC)=C)OSC  
 PUGREST.BadRequest: error:  
 C12=C(OC)C(OC)=C(OC)C=C1CC[C@H1](NC(C(O)=O)(O)CC3=CC(OC)=C(C=C3C2)N)C=O  
 PUGREST.BadRequest: error:  
 C1=C(OC)C(=CC=C1C2=C(C(OC)=C(OC)C=C2CC[C@H1](C=CC(C(O)=CC)O)C(C(C)C)=O)S)C  
 PUGREST.BadRequest: error:

OC1=C(OC)C(OC)=CC=C1C2=CC=C(NC)CC=C2[C@@H1](N3C(C(OC)=O)=C(N=N3)C=O)OC  
PUGREST.BadRequest: error:  
COC(NCCCCC1=CN(N=N1)[C@H1]2CCC3=CC(OC)=C(OC)C(=C3C4=CC=C(NC)C(C=C24)=O)OC=O)=O  
PUGREST.BadRequest: error: C(=CC=CN(COCC)OCC1)=CN(N=N1)[C@H1]2CCC3=C(C(OC)=C(OC)C(OC)=C3)C4=CC=C(C(C=C24)=O)NC  
PUGREST.BadRequest: error: C=1C(C)(C)OC(=O)/N=C(/N[C@H1]2CCC3=C(C(OC)=C(OC)C(OC)=C3)C4=CC=C(NC)C(=O)C=C42)N=1  
PUGREST.BadRequest: error: C=1C(C)(C)OC(=O)/N=C(/N[C@H1]2CCC3=C(C(OC)=C(OC)C(OC)=C3)C4=CC=C(C(C=C24)=O)NC)N=1  
PUGREST.BadRequest: error:  
C=1C(C)OC(=O)/N=C(/N[C@H1]2CCC3=C(C(OC)=C(OC)C(OC)=C3)C4=CC=C(NC)C(=O)C=C42)N=1  
PUGREST.BadRequest: error:  
C=1NC=2CC=C3[C@H1](CCC4=C(C(OC)=C(OC)C(=C4)OC)C3=CC=2)NC(C(=O)O)C=CN=1  
PUGREST.BadRequest: error:  
O=CC=CC=CC(NCC1=CN(N=N1)[C@H1]CCC2=CC(OC)=C(OC)C(OC)=C2C3=CC=C(C(=O)C=C3)N)C=O  
PUGREST.BadRequest: error:  
O=CC=CC1=CC2=C(SC)CC=C1[C@H1](CC3C=CC(OC)=C(C(=C32)C=O)OCN)NOCNCO  
PUGREST.BadRequest: error:  
CNCC1(C2=CC=C(C=C2)NC(=O)N[C@H1]C3CC4=CC(OC)=C(OC)C(OC)=C4C=CC=C(NC)C(=O)C=C31)C  
PUGREST.BadRequest: error:  
C1=CN=CC=C1C2=CN(N=N2)[C@H1]3CCC4=C(C(OC)=C(OC)C(OC)=C4)C5=CC=C(C(=O)C=C35)NCO  
PUGREST.BadRequest: error:  
COC=CC1CC[C@H1](NC(=O)NC=C[C@@H1](OC(C=CC=C)=O)C2=CC(OC)=C(OC)C(OC)=C2)C1NC=O  
PUGREST.BadRequest: error:  
O=CC=C1C=CC(NCC2=CN(N=N2)[C@H1]C3CC4=CC(OC)=C(OC)C(OC)=C4C=CC=C(NC)C(=O)C=C31)NC  
PUGREST.BadRequest: error:  
CNC=CC=C1C[C@H1](CCC2=CC(OC)=C(OC)C(=C12)OC)N3C(C(O)=O)=C(N=N3)C(=O)OONC  
PUGREST.BadRequest: error:  
CNC=C1C=C2C[C@H1](CCC3=CC(OC)=C(OC)C(=C23)OCC(=O)OC=C)C1=O  
PUGREST.BadRequest: error:  
COC=CC1C=2C[C@H1]NC(=O)NC3=CC=C(C1)C=C3C4=CCC(NC)=CC=C4C=2C(OC)=C1OCNC=O  
PUGREST.BadRequest: error:  
C=NC=CCC1OCCC=C2[C@H1](CCC3=C(C(OC)=C(OC)C(OC)=C3)C2=C1)N=O  
PUGREST.BadRequest: error:  
COC=C(OC)C(OC)=CCCC[C@H1](N1C=C(N=N1)COC(=O)C2=CC=NC=C2)C3=CC(=O)C(=CC=C3CNCN)C  
PUGREST.BadRequest: error:  
C12=CC(C=3C([C@@H1](NCC4=CC=C(C)C=C4CCC1)C2)=CC(=O)C(=CC=3)SC=C)(OC)C(OC)=COC  
PUGREST.BadRequest: error:  
C12=C3C(C4=CC=C(C(=O)C=C4[C@H1](CC3)N5C=C(N=N5)COC(=O)C6=CC=NC=C6)C1)NC=C2OCOCOC  
PUGREST.BadRequest: error:  
COC1=C(OC)C=CC=2CC[C@@H1](C3=CC(=O)C(NC)=CC=C3C1=2)N4C=C(N=N4)COCC5=CC=CC=C5OC  
PUGREST.BadRequest: error:  
C1=C2C(CC([C@H1](CC2)N3N=NC(=C3)C4(O)CCCC4)=O)CC(OC)=C(C(=C1)OC)OC  
PUGREST.BadRequest: error:  
C=C1C(C=C(CC[C@@H1]1N2N=NC(=C2)C3=CC=C(C1)C=C3)C=C(C(=COC)OC)OC)=CC(C(NC)=C)=O  
PUGREST.BadRequest: error:  
C=C1C(C2=C(CC[C@@H1]1N3C=C(N=N3)COCC4=CC=CC=C4)C=C(C(OC)=C2OC)OC)=CC=C(CN)C=O  
PUGREST.BadRequest: error:

CC(C)COC=1CC=C2[C@H1](CCC3=C(C(OC)=C(OC)C(OC)=C3)C2=CC=1)NSC=0  
PUGREST.BadRequest: error:  
CC(C)(O)C=CN([C@H1]1CCC2=CC(OC)=C(OC)C(OC)=C2C3=CC=C(C(C=C13)=O)NC)O  
PUGREST.BadRequest: error: CCCCCCCCCCCCCCCC0CC1=CN(N=N1)[C@H1]2CCC3=CC(OC)=C(OC)  
)C(OC)=C3C=CC=C(NC)C(=O)C=C2O  
PUGREST.BadRequest: error: CCCCCCCCCCCCCCCC0CC1=CN(N=N1)[C@H1]2CCC3=CC(OC)=C(OC)  
)C(OC)=C3C=CC=C(NC)C(=O)C=C2O  
PUGREST.BadRequest: error:  
C[C@H1](NC(C)=O)C1=CCC(SC)=CC=C1C2=C(C=C(OC)C(OC)=C2OCC3=CC=CC=C3)OSC  
PUGREST.BadRequest: error:  
C=12C(=CC(C(NC)=CC=1)=O)[C@H1](CCC3=CC(OC)=C(OC)C(=C32)OC)C(C)C=O  
PUGREST.BadRequest: error:  
NC(=O)NCC1=CN(N=N1)[C@H1]2CCC3=CC(OC)=C(OC)C(OC)=C3C4=CC=C(NC)C(=O)C=C24  
PUGREST.BadRequest: error:  
N(C(C1=CC=NC=C12)=O)[C@H1]3CC(C4=C(C(OC)=C(OC)C=C4CC3)OC(CC)=O)=CC=C(SC)C2=O  
PUGREST.BadRequest: error:  
C=12C(=CC(C(NC)=CC=1)=O)[C@H1](CCC3=CC(OC)=C(OC)C(=C3C2)NC(C)C)CSCSC  
PUGREST.BadRequest: error:  
C12[C@H1](NC(O)=O)C3=CCC(SC)=CC=C3C4=C(C(OC)=C(OC)C=C4CC1)OC=CC2=O  
PUGREST.BadRequest: error:  
C1=CC(OC)=CC=C1CN[C@H1]2CCC3=C(C(OC)=C(OC)C(OC)=C3)C=4C2=CC(C(=CC=4)NC)=O  
PUGREST.BadRequest: error:  
C=CC(OC)=C(OC)C(OC)=CC1(C2=CC=C(NC)CC=C2[C@H1](CCC1)NC(=O)C=O)SC  
PUGREST.BadRequest: error:  
O(C1=CC(=CC(OC)=C1OC)CC[C@H1](NC(N(C(C)C)C(C2)C)=O)C=CCC(NC)=CC=C2ONC)C  
PUGREST.BadRequest: error:  
N(C(C1=CC=CC=C1)=O)CCN[C@H1]2CCC3=CC(OC)=C(OC)C(OC)=C3C4=CC=C(C(C=C24)=O)SC  
PUGREST.BadRequest: error:  
C1[C@H1](NC(O)=O)C2=CCC=CC=C2C3=C(OC)C(OC)=C(OC)C=C3CCNC=C1O  
PUGREST.BadRequest: error:  
C1=C(C(OC)=C(OC=2)CC3=CC=C(NC)C(C=C3[C@H1](NC(N(COC)C)O)SCCC=21)NC)OC  
PUGREST.BadRequest: error:  
N1=NC1=C(C(=O)O)NC(=O)N[C@H1]2CCC3=CC(OC)=C(OC)C(OC)=C3C=CC=C(NC)C(=O)C=C2  
PUGREST.BadRequest: error:  
N=CC=C(NCN[C@H1]1CCC2=CC(OC)=C(OC)C(OC)=C2C3=CC=C(C(C=C13)=O)N)C=O  
PUGREST.BadRequest: error:  
N=CC=C(NCN[C@H1]1CCC2=CC(OC)=C(OC)C(OC)=C2C3=CC=C(NC)C(=O)C=C13)O  
PUGREST.BadRequest: error:  
N=NC1=CN(N=N1)[C@H1]2CCC3=CC(OC)=C(OC)C(OC)=C3C4=CC=C(C(=O)C=C42)NCOC  
PUGREST.BadRequest: error:  
N=NC(=C(C(OC)=O)N[C@H1]1CCC2=CC(OC)=C(OC)C(OC)=C2C3=CC=C(C(C=C13)=O)N)C  
PUGREST.BadRequest: error:  
CNC=1C(=O)C=C2[C@H1](CCC3=C(C(OC)=C(OC)C(OC)=C3)C2=CC=1)NC(C(=O)O)=CN=CNC  
PUGREST.BadRequest: error:  
C=CC1C[C@H1](NC(C2)=O)C=CC=3C(OC)=C2C1=CC=C(SC)C(C=3)=O  
PUGREST.BadRequest: error:  
N1=CC=CC2=C1C(OC=CC(OC=3)=CCCC[C@H1](NC(C)=O)C4=CCC(NC)=CC=C4C=32)=O  
PUGREST.BadRequest: error:

CNC=1C(=O)C=C2[C@H1](CCC3=CC(OC)=C(OC)C(OC)=C3C2=CC=1)NC4(C(=O)O)C=CN=C4NC  
 PUGREST.BadRequest: error:  
 N1=CC=CC=C1COC=C(C(OC=2)=CCCC[C@H1](NC(C)=O)C3=CC(C(SC)=CC=C3C=2OCO)=O)O  
 PUGREST.BadRequest: error:  
 C=C1[C@H1](CCC2=C(C(OC)=C(OC)C(OC)=C2)C1=CC=CC(C)=O)NCNC(=O)CSC  
 PUGREST.BadRequest: error:  
 CN1CC(=O)C=C2C(C3=C(OC)C(OC)=C(OC)C=C3CC[C@@H1]2N4C(C(O)=O)=C(N=N4)OCNC)=CC1  
 PUGREST.BadRequest: error:  
 NN(C=C(CNC(CCCCC1)=O)N=N)[C@H1]1CCC2=CC(OC)=C(OC)C(OC)=C2C3=CC=C(NC)C(=O)C=C31  
 PUGREST.BadRequest: error:  
 C=C1[C@H1](C=2CC=CC(OC)=C(OC)C(OC(C3=CC=CC=C3)=O)=CC1=CC=C)C(C=2)=O  
 PUGREST.BadRequest: error:  
 N=NC1=CN(N=N1)[C@H1]2CCC3=CC(OC)=C(OC)C(=C3C4=CC=C(NC)C(C=C42)=O)OC  
 PUGREST.BadRequest: error:  
 N=NC=C(C(=O)O)NC(=O)N[C@H1]CCC1=CC(OC)=C(OC)C(OC)=C1C2=CC=C(NC)C(=O)C=C2  
 PUGREST.BadRequest: error:  
 COC1=CC(=CC(OC)=C1OC)CC[C@H1](NC(N(C(C)C)C(C2)C)=O)C=CC(C(NC)=CC=C2NC=O)NC  
 PUGREST.BadRequest: error:  
 C=C1[C@H1](CCC2=CC(OC)=C(OC)C(OC)=C2C1=CC=C(C(C)=O)N3C)NC(C(=O)O)=C3NC  
 PUGREST.BadRequest: error:  
 CNC=1C(=O)C=C2[C@H1](CCC3=CC(OC)=C(OC)C(OC)=C3C2=CC=1)NC(C(=O)O)C=CN=CNC  
 PUGREST.BadRequest: error:  
 N=NC(=C(C(=O)O)NC(=O)N[C@H1]C1CC2=CC(OC)=C(OC)C(OC)=C2C=CC=C(NC)C(=O)C=C1)CC  
 PUGREST.BadRequest: error: CC(C)(C)OC(=O)NCCC(NCC=1N=NN(C=1)[C@H1]CCC2=CC(OC)=C(OC)C=C2C3=CC=C(NC)C(C=C3)=O)OC=O  
 PUGREST.BadRequest: error: CC(C)(C)OCNCCC(=O)NCC1=CN(N=N1)[C@H1]C2CC3=CC(OC)=C(OC)C(OC)=C3C4=CC=C(C(=O)C=C24)NC=O  
 PUGREST.BadRequest: error:  
 COC(=O)C1=C(N=NN(CNCC)OCCCC(=O)C2=CC(C3=C(OC)C(OC)=C(OC)C=C3CC[C@@H1]2N1)C)O  
 PUGREST.BadRequest: error: CC(C)(C)OCNCCC(=O)NCC1=CN(N=N1)[C@@H1]2C3=CC(C(NC)=C(C=C3C=C(CC2)C=C(OC)C(OC)NC)=O  
 PUGREST.BadRequest: error:  
 C1(=CN(C(=O)OCC)N[C@@H1]2C=3C(C4=C(OC)C(OC)=C(OC)C=C4CC2)=CC=C(C(=O)C=3)NC)N=C1  
 PUGREST.BadRequest: error: CC(C)(C)OCNCCC(=O)NCC1=CN(N=N1)[C@@H1]2C3=CC(C(NC)=C(C=C3C4=C(CC2)C=C(OC)C(=C4OC)NC)=O  
 PUGREST.BadRequest: error: C1C(C)(C)OC(=O)NCCC1NCC=2N=NN(C=2)[C@H1]3CCC4=CC(OC)=C(OC)C(OC)=C4C=CC=C(NC)C(=O)C=C3O  
 PUGREST.BadRequest: error: CC(C)(C)OC(=O)NCCC(OC=1N=NN(C=1)[C@H1]CCC2=CC(OC)=C(OC)C(=C2C3=CC=C(NC)C(=O)C=C3)O)C=O  
 PUGREST.BadRequest: error:  
 CC(C)OC(=O)/N=C(/N[C@H1]1CCC2=C(C(OC)=C(OC)C(OC)=C2)C3=CC=C(NC)C(=O)C=C13)N=N  
 PUGREST.BadRequest: error:  
 C=1N(N=NC=1C(OCC)=O)[C@H1]2CCC3=C(C(OC)=C(OC)C(OC)=C3)C4=CC=C(C(=O)C=C42)NCOCC  
 PUGREST.BadRequest: error:  
 O=CC=CN=NN[C@H1]1CCC2=C(C(OC)=C(OC)C(=C2)OC)C3=CC=C(NC)C(=O)C=C13  
 PUGREST.BadRequest: error:  
 CNC=CC=C1C[C@H1](CCC2=CC(OC)=C(OC)C(=C12)OC)NC3(C(=O)O)C=CN=N3  
 PUGREST.BadRequest: error:

CNC=CC=C1C([C@H1](CCC2=CC(OC)=C(OC)C(=C12)OC)NC(C(=O)OCC)=C(C(OC)=O)ONC)SC  
 PUGREST.BadRequest: error:  
C=1NC=2CC=C3[C@H1](CCC4=C(C(OC)=C(OC)C(OC)=C4)C3=CC=2)NC(C(=O)O)C=CN=1  
 PUGREST.BadRequest: error: C1=CN=CC=C1C(NCC2=CN(N=N2)[C@H1]3CCC4=CC(OC)=C(OC)C(=C4C5=CC=C(C(C=C53)=O)OC)OO)C  
 PUGREST.BadRequest: error:  
N=NN([C@H1]1CCC2=C(C(OC)=C(OC)C(OC)=C2)C3=CC=C(C(=O)C=C13)NC)COC4CC=CC=C4O  
 PUGREST.BadRequest: error:  
N=NN([C@H1]1CCC2=C(C(OC)=C(OC)C(OC)=C2)C3=CC=C(C(=O)C=C13)NC)C(=O)OCC  
 PUGREST.BadRequest: error:  
N=NN([C@@H1]1C2=CC(C(NC)=CC=C2C3=C(C(OC)=C(OC)C=C3CC1)OC)=O)OCC=C=O  
 PUGREST.BadRequest: error:  
C=C1C(C=C(CC[C@@H1]1N2N=NC(=C2)CNC(=O)OCC(C)C)C=C(C(OC)=COC)O)C=CC=C(C=O)NC  
 PUGREST.BadRequest: error:  
C=C1C(C2=C(CC[C@@H1]1N3N=NC(=C3)CNC(=O)OCC(C)C)C=C(C(OC)=C2OC)O)C=CC=C(C=O)NC  
 PUGREST.BadRequest: error:  
C1=C2C(CC([C@H1](CC2)N3N=NC(=C3)CNC(=O)C(C1)C1)=CC(=O)C(=CC)NC)=C(OC)C(OC)=C1OC  
 PUGREST.BadRequest: error:  
CN(N([C@@H1]1C2=CC(=O)C(NC)=CC=C2C3=CC(=C(OC)C=C3CC1)OC)O)CNC(=S)NCCCCC  
 PUGREST.BadRequest: error:  
N([C@H1]1CCC2=CC(=C(OC)C(=C2C3=CC=C(C(C=C31)=O)NC)OC4)OC[C@H1])(OC4)NC(=S)O  
 PUGREST.BadRequest: error:  
CN(N([C@@H1]1C2=CC(=O)C(NC)=CC=C2C3=CC(=C(OC)C=C3CC1)OC)O)CNC(=S)CCCCC  
 PUGREST.BadRequest: error: CN(N([C@@H1]1C2=CC(=O)C(NC)=CC=C2C3=CC(=C(OC)C=C3CC1)OC)O)CNC(=S)N4C[C@@H1](O)[C@@H1]OC4=CC  
 PUGREST.BadRequest: error:  
OC=CC=C1C2=C(OC)C(OC)=C(OC)C=C2CC[C@H1](C3=CCC(=CC=C31)NC)ON  
 PUGREST.BadRequest: error: O1C=CC=CC2=C(OC)C(OC)=C(OC)C=C2CC[C@@H1]1C=CCC(F)F  
 PUGREST.BadRequest: error:  
O(C=CC=CC1=C(OC)C(OC)=C(OC)C=C1CC[C@H1](C=C2CC(OCC(C)C)=O)N=C2ON)C  
 PUGREST.BadRequest: error:  
O(C=CC=CC1=C(OC)C(OC)=C(OC)C=C1CC[C@H1]C=CCC(OC(=O)OCC)=CC)C  
 PUGREST.BadRequest: error:  
O=C(CC)OCC1=CN(N=N1)[C@H1]2CCC3=CC(OC)=C(OC)C(OC)=C3C4=CC=C(NC)C(=O)C=C24  
 PUGREST.BadRequest: error:  
O=C(OC)CCOC=CC=C1C[C@H1](CCC2=CC(OC)=C(OC)C(OC)=C21)NC=O  
 PUGREST.BadRequest: error:  
O(C=CC=CC1=C(OC)C(OC)=C(OC)C=C1CC[C@H1](C=CCC(OCC2=CC=CC=C2)OONC)ONCC  
 PUGREST.BadRequest: error:  
OC=CC=CC1=C(OC)C(OC)=C(OC)C=C1C2C[C@H1](C=CCC(OCC(C)C)=O)N=C2ONC  
 PUGREST.BadRequest: error:  
O=C(OCC=C)N1C(=O)N[C@H1]CCC2=C(C(OC)=C(OC)C(OC)=C2)C3=CC=C(NC)C(C=C13)=O  
 PUGREST.BadRequest: error: O=C(OC(C)(C)C)NCC=1N=NN(C=1)[C@H1]C2CC3=CC(OC)=C(OC)C(OC)=C3C4=CC=C(NC)C(=O)C=C42  
 PUGREST.BadRequest: error:  
O=C(C(C)C)NCN[C@H1]1CCC2=CC(OC)=C(OC)C(OC)=C2C3=CC=C(NC)C(=O)C=C13  
 PUGREST.BadRequest: error:  
O=C(OCC(C)COCC=1)N=NN(C=1)[C@@H1]2C3=CC(C(NC)=CC=C3C4=C(OC)C(OC)=C(OC)C=C4CC2)=O

PUGREST.BadRequest: error: O=C(OCC)C=1N(N=NC=1C(=O)O2)[C@H1]2NC(=S)N[C@H1]3CCCC4=CC(OC)=C(OC)C(OC)=C4C=5C3=CC(C(=CC=5)NC)=O

PUGREST.BadRequest: error:  
OC1=C2C3=CC=C(NC)CC=C3[C@H1](CCC2=CC(OC)=C1OC)NC(C(O)=O)=O

PUGREST.BadRequest: error:  
CC(O)(OC(=O)CC1)CN(N=N1)[C@H1]2CCC3=CC(OC)=C(OC)C(OC)=C3C4=CC=C(NC)C(=O)C=C24

PUGREST.BadRequest: error:  
C1=2C(O)CN(CC3O)N1[C@H1]CCSC(C4=C(C=C(OC)C(OC)=C4OC(O)CCC3=O)CC=2)C

PUGREST.BadRequest: error: CC(O)(C)CC(=O)OCC1=CN(N=N1)[C@H1]2CCC3=CC(OC)=C(OC)C(OC)=C3C=4C2=CC(C(=CC=4)NC)=O

PUGREST.BadRequest: error:  
CC(C)COC(NCC1=CN(N=N1)[C@H1]C2CC3=CC(OC)=C(OC)C(OC)=C3C4=CC=C(C(=O)C=C24)NC)=O

PUGREST.BadRequest: error:  
C=C(NC)CC=C1CC2=C(OC)C(OC)=C(OC)C=C2CC[C@@H1]1N3C(C=CC=C3OC(=O)OC)=O

PUGREST.BadRequest: error:  
COCNCC1=CN(N=N1)[C@H1]2CCC3=CC(OC)=C(OC)C(OC)=C3C4=CC=C(NC)C(=O)C=C24

PUGREST.BadRequest: error: CC(C)(C)OC(NCC=1N=NN(C=1)[C@H1]2CCC3=CC(OC)=C(OC)C(O)C)=C3C4=CC=C(C(C=C24)=O)N)C=O

PUGREST.BadRequest: error:  
OC1=C(C(OC)=CC2=C1C3=CC=C(NC)CC=C3[C@H1](CC2)N4C(C(O)=O)=C(N=N4)OC=O)O

PUGREST.BadRequest: error:  
C[C@H1](COC=CN=NN[C@H1]1CCC2=CC(OC)=C(OC)C(OC)=C2C=3C1=CCC(=CC=3)NC)OCCC

PUGREST.BadRequest: error:  
N(C)C1=CC=C2C3=C(OC)C(OC)=C(OC)C=C3CC[C@@H1](C2=CC1=O)NC(C(=O)O)CCONCOCNCOC

PUGREST.BadRequest: error:  
N(CCCCC)CC1C2C=C[C@H1](CCC3=CC(OC)=C(OC)C(OC(C)=O)=C3C2=CC=C1SCSC=O)C

PUGREST.BadRequest: error:  
O(C1=C(C(OC)=CC2=C1C3=CC=C(NC)CC=C3[C@H1](CC2)N4C(C(O)=O)=C(N=N4)OC=O)O)OCC

PUGREST.BadRequest: error:  
N(C(C)C)C(NCC1=CN(N=N1)[C@H1]2CCC3=CC(OC)=C(OC)C(OC)=C3C4=CC=C(C(C=C24)=O)NC)=O

PUGREST.BadRequest: error:  
N(CCCCCC=O)CC1=CN(N=N1)[C@H1]2CCC3=CC(OC)=C(OC)C(OC)=C3C4=CC=C(C(C=C24)=O)NC

PUGREST.BadRequest: error:  
N(C(C)=O)[C@@H1]1C2=CC(C(SC)=CC=C2C3=C(C(OC)=C(OC)C=C3CC1)OC(C4=CCCC=C4)=O)C

PUGREST.BadRequest: error:  
N(CCCCC)CC1CC2=C[C@H1](CCC3=CC(OC)=C(OC)C(OC(C)=O)=C3C2=CC=C1SCNC=O)C

PUGREST.BadRequest: error:  
O=C(OCC)C1=C(C(OCC)=O)N=NN1[C@H1]CCC2=CC(OC)=C(OC)C(OC)=C2C3=CC=C(NC)C(C=C3)=O

PUGREST.BadRequest: error:  
N([C@H1]1CCC2=CC(OC)=C(OC)C(OC)=C2C3=CC=C(NC)C(C=C13)=O)C=CCOC(=O)CCCC=O

PUGREST.BadRequest: error:  
O=C(OCC1=CC2=C(C=C1)F)N[C@@H1]CC(C3=C(C=C(OC)C(OC)=C3OC(OCC)=O)NCCC2)=CC=C(O)C=O

PUGREST.BadRequest: error:  
C1OC=CC2=C(C3=CC=C(NC)CC=C3[C@@H1](N)CC2)ONC(OC)=C1OC

PUGREST.BadRequest: error: C1=C2CC[C@H1](C3=CCC(SC)=CC=C3C2=C(C(OC)=C1OC)OC=O)N

PUGREST.BadRequest: error:  
C=CCC1[C@H1](CC=[N+1]C2=C1CC(C(OC)=C2OCOC=C)C=CSC)C=O

PUGREST.BadRequest: error:

C10C=C2C3=CC=C(NC)C(=O)C=C3[C@H1](CCC2C=COC)NCCCCC=C1  
 PUGREST.BadRequest: error:  
 C10C=C2C3=CC=C(NC)C(=O)C=C3[C@H1](CCC2C=COC)NCCCCC=C10C  
 PUGREST.BadRequest: error:  
 C1=C2CC[C@H1](CC(C2=C(OC)C(=C10C)OC)=CC=C(NC)C=O)CN=[N+1]=[N-1]  
 PUGREST.BadRequest: error:  
 COC=C1C2=C3C=C(NC)C(C=C2[C@@H1](NCCCCCCCCC)CCC1=CC(=C3OC)O)C=O  
 PUGREST.BadRequest: error:  
 CC(CC)N[C@H1]C1CC2=CC(OC)=C(OC)C(OC)=C2C3=CC=C(C(C=C31)=O)NCC  
 PUGREST.BadRequest: error:  
 CC(CC)N[C@H1]C1CC2=CC(OC)=C(OC)C(OC)=C2C3=CC=C(NC)C(=O)C=C31  
 PUGREST.BadRequest: error:  
 C(CCCCN1[C@H1]CCC2=CC(OC)=C(OC)C(OC)=C2C3=CC=C(SC)CC=C13)=O  
 PUGREST.BadRequest: error:  
 CC(CC)N[C@H1]C1CC2=CC(OC)=C(OC)C(OC)=C2C3=CC=C(C(C=C31)=O)NC  
 PUGREST.BadRequest: error:  
 C1(=NC=C(O)C(C)=CC1)C2=C(C(OC)=C(OC)C=C2CC[C@H1](O)C=CN)CSC  
 PUGREST.BadRequest: error:  
 C1(=CC=C(O)C(CCC)C=O)C2=C(OC)C(OC)=C(OC)C=C2CC[C@H1](NC(=O)C)C1SC  
 PUGREST.BadRequest: error:  
 COC=C1C2=CC=C(NC)C(=O)C=C2[C@@H1](NCC(C)CCC)CCC1=CC(=COC)OC  
 PUGREST.BadRequest: error:  
 C10C=C2C3=CC=C(NC)C(=O)C=C3[C@@H1](NC(=N)N)CCC2=CC(OC)=C10C  
 PUGREST.BadRequest: error:  
 COC1=C2C3=CC=C(NC)C(=O)C=C3[C@@H1](NCC(CCC)C)CCC2=CC(OC)=C10C  
 PUGREST.BadRequest: error:  
 NC1=CC=CC=C1C2=CC3=C(OC)C(=C(OC)C=C3CC[C@H1](NCCC)C2NCO)O  
 PUGREST.BadRequest: error:  
 COC=C1C2=CC=C(NC)CC=C2[C@@H1](NCCC#N)CCC1=CC(=COC)OC=O  
 PUGREST.BadRequest: error:  
 C1=C2CC[C@H1](C3=CCC(SC)=CC=C3C2=C(C(OC)=C10C)OC=O)NCCC#N  
 PUGREST.BadRequest: error:  
 C1=C2CC[C@H1](C3=CCC(SC)=CC=C3C2=C(C(OC)=C10C)OC=O)NCCC  
 PUGREST.BadRequest: error:  
 COC1=C2C3=CC=C(NC)C(=O)C=C3[C@H1](CCC2=CC(OC)=C10C)NCC4=CC=NS4  
 PUGREST.BadRequest: error:  
 COC1=C2C3=CC=C(SC)C(=O)C=C3[C@H1](CCC2=CC(OC)=C10C)NCCCC1  
 PUGREST.BadRequest: error:  
 COC1=C2C3=CC=C(NC)C(=O)C=C3[C@H1](CCC2=CC(OC)=C10C)NCC=CC=NCN  
 PUGREST.BadRequest: error:  
 COC1=C2CC([C@H1](CCC2=CC(OC)=C10C)NCCCC1)C(C(=CC)NC)=O  
 PUGREST.BadRequest: error:  
 C=1NCC(=O)C=C2C=1C3=C(OC)C(OC)=C(C=C3CC[C@@H1]2NCCCC1)C=CC  
 PUGREST.BadRequest: error:  
 O(C1=C(OC)C(OC)=CC23C([C@@H1](NC(N)=S)CCC2=C1)=CC(C(NC)=CC3)=O)NCC  
 PUGREST.BadRequest: error:  
 O(C1=C(OC)C=2C3=CC=C(SC)CC=C3[C@H1](CCC=2C=C10C)NC(C)CC=C)OC  
 PUGREST.BadRequest: error:



C1=C(OC)C(OC)=C(OC)CC2=CC=C(SC)C(C=C2[C@@H1](NC(N(C)C)=O)CCC1)=O  
 PUGREST.BadRequest: error:  
 C12=C(OC)C(OC)=C(OC)C=C1CC[C@H1](NC(C3)=O)C(C(NC)=CC=C32)=O  
 PUGREST.BadRequest: error:  
 C1[C@H1](OCCC2)CC=C(C(OC)=C(OC)C=C2CC1N3C=CC=C(NC)CC3)ONC(C)=O  
 PUGREST.BadRequest: error:  
 N(C)C=1C(=O)C=C2[C@H1](CCC3=CC(OC)=C(OC)C(OC)=C3C2=CC=1N)C(C)CCSCSC  
 PUGREST.BadRequest: error:  
 O(C1=C(OC)C=2C3=CC=C(SC)C(C=C3[C@H1](CCC=2C=C1OC)NC(C)CC=C)=O)C  
 PUGREST.BadRequest: error:  
 C12=C(OC)C(=C(OC)C=C1CC[C@H1](NCC(O)=O)C3=CCC(NC)=CC=C32)OOC  
 PUGREST.BadRequest: error:  
 C1[C@H1](NCC)CC2=CC(C(NC)=CC=C2C3=C(OC)C(OC)=C(OC)C=C3C1N)C(=O)C  
 PUGREST.BadRequest: error:  
 C1=C(OC)C(OC)=C(OC=2)CC3=CC=C(SC)C(C=C3[C@@H1](NC(N(C)C)=O)CCC=21)=O  
 PUGREST.BadRequest: error:  
 N(C)C=1C(=O)C=C2[C@H1](CCC3=CC(OC)=C(OC)C(OC)=C3C2=CC=1N)C(C)CCNC  
 PUGREST.BadRequest: error:  
 C1=C2CC[C@H1](C3=CCC(SC)=CC=C3C2=C(C(OC)=C1OC=4)OC=O)NCC=CC=4  
 PUGREST.BadRequest: error:  
 COC1=CC2=CC=C(SC)C(=O)C=C2[C@@H1](NCC3=CC=CC=C3)CCC1=CC(OC)=COC  
 PUGREST.BadRequest: error:  
 N1=NN([C@@H1]C2=CC(C(O)=CC=C2C3=C(CC)C=C(OC)C(OC)=C3OC)=O)CC(O)=C1F  
 PUGREST.BadRequest: error:  
 N1=NN([C@@H1]C2=C3C(C(C)=CC=C3C4=C(CC2)C=C(OC)C(OC)=C4OC)=O)N=CC=N1  
 PUGREST.BadRequest: error:  
 CNC=1C(C=C2[C@H1](CCC3=C(C(OC)=C(OC)C(OC)=C3)C2=CC=1)NC(C)=O)SC=O  
 PUGREST.BadRequest: error:  
 N1=NC=CN=C2C1(C3=C[C@H1](CCC=C2C(OC)=C(OC)C(OC)=C3N)C(C)C=C)OF  
 PUGREST.BadRequest: error:  
 O=CC=C1N=NN(C1)[C@@H1]2C3=CC(C(NC)=CC=C3C4=C(OC)C(OC)=C(C=C4CC2)OC)NC  
 PUGREST.BadRequest: error:  
 N1=NN([C@@H1]C2=CC(C(O)=CC=C2C3=C(CC)C=C(OC)C(OC)=C3OC)=O)CC=C1  
 PUGREST.BadRequest: error:  
 O=CC1=CN=NN1[C@H1]2CCC3=C(C(OC)=C(OC)C(OC)=C3)C4=CC=C(C(C=C42)N)COC  
 PUGREST.BadRequest: error:  
 C1=CN=CC=C1CN[C@H1]2CCC3=CC(OC)=C(OC)C(OC)=C3C4=CC=C(C(C=C24)=O)NCC  
 PUGREST.BadRequest: error:  
 CSC=1C(C=C2[C@H1](CCC3=C(C(OC)=C(OC)C(OC)=C3)C2=CC=1)NC(C)=O)NC=O  
 PUGREST.BadRequest: error:  
 C1NC=CC=C2C([C@@H1](NC(C(C)C)=O)CCC3=CC(OC)=C(OC)C(OC)=C23)C1=O  
 PUGREST.BadRequest: error:  
 O=CC1=CN=NN1[C@H1]2CCC3=CC(OC)=C(OC)C(OC)=C3C4=CC=C(C(C=C42)=O)NC  
 PUGREST.BadRequest: error:  
 OCCN(CC=C)C(=O)N[C@H1]1CCC2=CC(OC)=C(OC)C(OC)=C2C3=CC=C(NC)C(=O)C=C31  
 PUGREST.BadRequest: error:  
 O=C1C2=C[C@H1](CCC=C3C(OC)=C(OC)C(OC(C)=O)=C3C2=CC=C1NC(C)=O)NC  
 PUGREST.BadRequest: error:

OCCN(CC=C)C(=O)N[C@H1]1CCC2=CC(OC)=C(OC)C(OC)=C2C3=CC=C(NC)C(=O)C=C13  
 PUGREST.BadRequest: error:  
 C=CN=C1C(C)NC(=O)OC=CC=C2C3=C(OC)C(OC)=C(OC)C=C3CC[C@@H1](C2=C1)NCCC  
 PUGREST.BadRequest: error:  
 O=C1C=C2[C@H1]CCC3=CC(OC)=C(OC)C(OC)=C3C2=CC=C1SCNC(C)=O  
 PUGREST.BadRequest: error:  
 N1=NC(=CN(N=N1)[C@H1]2CCC3=CC(OC)=C(OC)C(OC)=C3C4=CC=C(C(C=C24)=O)N)C  
 PUGREST.BadRequest: error:  
 C12=CC(C(NC)=CC=C1C3=C(C=C(OC)C(OC)=C3OC)CC[C@@H1]2NCCC(F)(F)F)=CO  
 PUGREST.BadRequest: error:  
 C1=C2C([C@H1](CCC3=CC(OC)=C(C(=C32)OC)OC)NCCCC1)C(C(=C1)NC)=O  
 PUGREST.BadRequest: error:  
 CNC(N(C)C)CN[C@H1]1CCC2=CC(OC)=C(C(OC)=C2C=3C1=CC(=O)C(NC)=CC=3)OC  
 PUGREST.BadRequest: error:  
 N1C(NC)=CC=C2C([C@H1](CCC3=CC(OC)=C(C(OC)=C23)OC)NCCC(C)C)=CC1=O  
 PUGREST.BadRequest: error:  
 C12=CCC(NC)=CC=C1C3=C(C=C(OC)C(OC)=C3OC)CC[C@@H1]2NCC=4SC=CC=4O  
 PUGREST.BadRequest: error:  
 C12=CC(C(NC)=CC=C1C3=C(OC)C(=C(C=C3CC[C@@H1]2N4C=C(CO)N=N4)O)CO)C=O  
 PUGREST.BadRequest: error:  
 C=1=C2C([C@H1](CCC3=CC(OC)=C(C(OC)=C23)OC)NCC=CC=O)C(=CC=1)SC  
 PUGREST.BadRequest: error:  
 COC=C(OC)C(OC)=CCCC=1[C@H1](NCC(C)C)C2=CC(=O)C(SC)=CC=C2C=1  
 PUGREST.BadRequest: error:  
 C1=C2C(C3=C(OC)C(=C(C=C3CC[C@@H1]2NCC4=CC=CS4)O)CO)C=CC=C(NC)C1=O  
 PUGREST.BadRequest: error:  
 COC1=C(OC)C(OC)=CCCC=2[C@H1](NCC(C)C)C3=CC(=O)C(SC)=CC=C3C1=2  
 PUGREST.BadRequest: error:  
 C1=CC(C(=CC=C1C2=C(OC)C(OC)=C(C=C2CC[C@@H1]NCCOO)C)OC)(CC)O  
 PUGREST.BadRequest: error:  
 NC(N(CC)OC)N[C@H1]1CCC2=CC(OC)=C(OC)C(OC)=C2C=3C1=CC(=O)C(NC)=CC=3F  
 PUGREST.BadRequest: error:  
 O=CC(SC)=CC=C1C([C@H1](CCC2=CC(OC)=C(OC)C(OC)=C12)N)=CCNC  
 PUGREST.BadRequest: error:  
 O=C1C(SC)=CC=C2C([C@H1](CCC3=CC(OC)=C(OC)C(OC)=C23)NCC)C=C1  
 PUGREST.BadRequest: error:  
 C12=CC=C(NC)C(C=C1[C@@H1](NC(C)=O)CCC3=CC(OC)=C(OC)C(OC)=C23)SC=O  
 PUGREST.BadRequest: error:  
 OC(OC1=C2C3=CC=C(SC)C(C=C3[C@H1]CCC2=CC(=C1OC)O)CNC(C)=O)=O  
 PUGREST.BadRequest: error:  
 O1C(OC2=C3C4=CC=C(SC)C(C=C4[C@H1]CCC3=CCOC)=C2OCNC=CC=C1)C  
 PUGREST.BadRequest: error:  
 C12=CC=C(NC)C(C=C1[C@@H1](NC(N)=O)CCC=CC(OC)=C(OC)C(OC)=C2)O  
 PUGREST.BadRequest: error:  
 NC(CCN[C@H1]1CCC2=CC(OC)=C(OC)C(OC)=C2C=3C1=CC(=O)C=CC=3)NCF  
 PUGREST.BadRequest: error:  
 O=C1C(NC)=CC=C2C3=C(OC)C(OC)=C(C=C3CC[C@@H1](C2=C1)NCC)OOCSC  
 PUGREST.BadRequest: error:

C1 [C@H1] (C2=CC(C(SC)=CC=C2C3=C(OC)C(OC)=C(C=C3C1)O)C)ONC  
PUGREST.BadRequest: error:  
C12=CC=C(NC)C2(C=C1 [C@@H1] (NC(C)=O)CCC3=CC(OC)=C(OC)C(OC)=C3)SC  
PUGREST.BadRequest: error:  
C1=C2C=C(NC)C(C=C1 [C@H1] CCC3=CC(OC)=C(OC)C(OC)=C23)NC(N)=O  
PUGREST.BadRequest: error:  
C1=C2C=C(NC)C(C=C1 [C@H1] CCC3=C2C(OC)=C(OC)C(OC)=C3)NC(C)=O  
PUGREST.BadRequest: error:  
COCC(C)=CC1=CC([C@@H1] (NC(C)=O)CCC2=CC(OC)=C(OC)C(OC)=C21)=CSC  
PUGREST.BadRequest: error:  
C1 [C@H1] (C2=CCC(SC)=CC=C2C3=C(OC)C(OC)=C(OC)C=C3C1)ONCC  
PUGREST.BadRequest: error:  
C=C1C2=C(OC)C(OC)=C(OC)C=C2CC[C@H1] (NC(C)=O)C1=CC=C(NC)C(=O)CNC  
PUGREST.BadRequest: error:  
C=1C2=CC(=CC(C=1OC)=O) [C@H1] (CCC3=CC(OC)=C(OC)C(OC)=C32)NC(C)=O  
PUGREST.BadRequest: error:  
NC(N=C1C=CC2)=CC=C1C3=C(OC)C(OC)=C(OC)C=C3CC[C@@H1] 2NC(N)=O  
PUGREST.BadRequest: error:  
C=CC1=C(NC)C(OC)=C(OC)C=C1CC[C@H1] (NC(C)=O)C2=CC(C(=CC=C2)NC)=O  
PUGREST.BadRequest: error:  
C [C@H1] (CCC1=CC(OC)=C(OC)C(OC)=C1C2=CC=C(C(C=C2)N)C=O)NCC  
PUGREST.BadRequest: error:  
C=1=C2C3=C(OC)C(OC)=C(OC)C=C3CC[C@H1] (NC(N)=O)C2=CC=C(SC)C(=O)C=1NC  
PUGREST.BadRequest: error:  
C [C@@H1] (C1CC2=CC(OC)=C(OC)C(OC)=C2C3=CC=C(C(C=C31)=O)SCN)C(=O)C  
PUGREST.BadRequest: error:  
C1=2 [C@H1] (CC(C3=CC(OC)=C(OC)C=C31)C=CC=C(NC)CC=2)OSC  
PUGREST.BadRequest: error:  
C=C(C)C=C1C(C(OC(C)=O)=CC=CC2=C(OC)C(OC)=C(OC)C=C2CC[C@@H1] 1N=O)C  
PUGREST.BadRequest: error:  
CC(N)(CCO) [C@H1] 1CCC2=CC(OC)=C(OC)C(OC)=C2C3=CC=C(NC)C(=O)C=C31  
PUGREST.BadRequest: error:  
CC(N)(CCO) [C@H1] 1CCC2=CC(OC)=C(OC)C(OC)=C2C3=CC=C(C(=O)C=C31)NCC  
PUGREST.BadRequest: error:  
C=C1 [C@@H1] (NC(C)=O)CCC2=CC(OC)=C(OC)C(OC)=C2C1=CC=C(NC)C=O  
PUGREST.BadRequest: error:  
C12 [C@H1] (NC(C)=O)C3=CC(C(SC)=CC=C3C4=C(OC)C(OC)=C(C=C4C1)OC=C2)NC=O  
PUGREST.BadRequest: error:  
N(NCCCCC1) [C@H1] 1CCC2=CC(OC)=C(OC)C(OC)=C2C3=CC=C(NC)C(=O)C=C31  
PUGREST.BadRequest: error:  
N(C1=CC=C(C=C1)C)CN [C@H1] 2CCC3=CC(OC)=C(OC)C(OC)=C3C=4C2=CC(C(NC)=CC=4)=O  
PUGREST.BadRequest: error:  
C12 [C@H1] (NC(C)=O)C3=CC(C(NC)=CC=C3C4=C(OC)C(OC)=C(OC)C=C4C1=C2)NC=O  
PUGREST.BadRequest: error:  
N1(C(=O)OC2=CC=CC3=C(OC)C(OC)=C(OC)C=C3CC[C@H1] (NC(C)=O)C2=CC1)SC  
PUGREST.BadRequest: error:  
C1 [C@H1] (NC(N)=O)C2=CC(C(NC)=CC=C2C3=C(C(OC)=C(OC)C=C3CC1)OC)NC=O  
PUGREST.BadRequest: error:

N(C1=CC=C(C=C1)C)CN[C@H1]2CCC3=CC(OC)=C(OC)C(OC)=C3C=4C2=CC(C(=CC=4)SC)=0  
 PUGREST.BadRequest: error:  
 N(C1=CC=C(C=C1)C1)C=CN(OC(CC)=0)[C@H1]CCC2=CC(OC)=C(OC)C(OC)=C2C=CC=C(C)CNC=0  
 PUGREST.BadRequest: error:  
 C12=C(CC=C3[C@H1](CCC4=CC(OC)=C(OC)C(OC)=C4C3=C1)NCC)OC2=0  
 PUGREST.BadRequest: error:  
 C=C(CN[C@H1]1CCC2=CC(OC)=C(OC)C(OC)=C2C3=CC=C(NC)C(C=C31)=0)C=0  
 PUGREST.BadRequest: error:  
 C1#CC(C=C2[C@H1](CCC3=CC(OC)=C(OC)C(OC)=C3C2=C1)NC(C)=0)=C  
 PUGREST.BadRequest: error:  
 C=C1[C@@H1](NC(N)=0)CCC2=CC(OC)=C(OC)C(OC)=C2C1=CC=C(NC)C=0  
 PUGREST.BadRequest: error:  
 CCN(CC)C(=O)N[C@H1]C1CC2=CC(OC)=C(OC)C(OC)=C2C3=CC=C(C(C=C31)=0)NC  
 PUGREST.BadRequest: error:  
 C1[C@H1](NC(C)=0)C2=CCC(SC)=CC=C2C3=C(OC)C(OC)=C(C=C3C1)OCNC(=O)C  
 PUGREST.BadRequest: error:  
 C=1C=C(NC)C(C=C2[C@H1](CCC3=CC(OC)=C(OC)C(OC)=C3C=12)CC=0)NSC=0  
 PUGREST.BadRequest: error:  
 C1=CC(=CC=C1CCCN[C@H1]2CCC3)CC(OC)=C(OC)C(OC)=C3C4=CC=C(SC)C(C=C42)=0  
 PUGREST.BadRequest: error:  
 N1([C@@H1]2C3=CC(C(SC)=CC=C3C4=C(OC)C(OC)=C(C=C4CC2)OC=CC=C1)O)CS  
 PUGREST.BadRequest: error:  
 CCN(CC)C(=O)N1[C@H1]CCC2=CC(OC)=C(OC)C(OC)=C2C3=CC=C(NC)C(C=C31)=0  
 PUGREST.BadRequest: error:  
 C1=CC(=CC=C1CCN[C@H1]2CCC3=C)C(OC)=C(OC)C(OC)=C3C4=CC=C(SC)C(C=C42)=0  
 PUGREST.BadRequest: error:  
 C1=CC(=CC=C1O)CN[C@H1]2CCC3=CC(OC)=C(OC)C(OC)=C3C4=CC=C(SC)C(C=C42)=0  
 PUGREST.BadRequest: error:  
 CCN(CC)C(=O)N[C@H1]1CCC2=CC(OC)=C(OC)C(OC)=C2C3=CC=C(C(C=C31)=0)NCC  
 PUGREST.BadRequest: error:  
 CCN[C@@H1]1C2=CC(C(NC)=CC=C2C3=C(OC)C(OC)=C(OC)C=C3CC1=0)=0  
 PUGREST.BadRequest: error:  
 CC(C)COC1=C(OC)C(OC)=CC=2CC[C@H1](NC(=O)C)C3=CC(C(SC)=CC=C3C1=2)=0  
 PUGREST.BadRequest: error:  
 CC(C)NC(N[C@H1]1CCC2=CC(OC)=C(OC)C(=C2C3=CC=C(NC)C(C=C31)=0)OC=O)C  
 PUGREST.BadRequest: error:  
 C=C(C)CN(CCO)C(=S)N[C@H1]1CCC2=C(C(OC)=C(OC)C(OC)=C2)C3=CC=C(NC)C(C=C31)=0  
 PUGREST.BadRequest: error:  
 CC(C)C(OC=C(C(OC)=CC=1CC[C@H1](NC(=O)C)C2=CC(C(SC)=CC=C2C=1)S)C=O)=0  
 PUGREST.BadRequest: error:  
 C=C(O)C(OC)=CC(=C)CN[C@H1]1CCC2=CC(OC)=C(OC)C(OC)=C2C3=CC=C(SC)C(C=C31)=0  
 PUGREST.BadRequest: error:  
 CC(C)C(OC=C(C(OC)=CCCC[C@H1](NC(=O)C)C1=CC(C(SC)=CC=C1C)=O)C)=0  
 PUGREST.BadRequest: error:  
 CC(CO1)(C(C)CO[C@H1]CCC2=C)C(OC)=C(OC)C(OC(=O)C)=C2C3=CC=C(NC)C(C=C31)=0  
 PUGREST.BadRequest: error:  
 O=C(N[C@@H1]1C2=CCC(NC)=CC=C2C3=C(CC1)C=C(OC)C(OC)=C3OC)OCC=C  
 PUGREST.BadRequest: error:

N([C@H]1CCCC2=CC(OC)=C(OC)C(OC)=C2C3=CC=C(NC)C(=O)C=C31)=C(C1)C=C  
 PUGREST.BadRequest: error:  
O=C(N[C@H]1CCCC2=CC(OC)=C(OC)C(OC)=C2C3=CC=C(C(C=C31)=O)NCN)C4=CC=CC=C4  
 PUGREST.BadRequest: error:  
N([C@H]1CCCC2=CC(OC)=C(OC)C(OC)=C2C3=CC=C(NC)C(C=C13)=O)C(C)C  
 PUGREST.BadRequest: error:  
O=C(N[C@@H]1C2=CC(C(NC)=CC=C2C3=C(CC1)C=C(OC)C(OC)=C3OC)=O)N=N  
 PUGREST.BadRequest: error:  
N([C@H]1CCCC2=CC(OC)=C(OC)C(OC)=C2C3=CC=C(NC)C(C=C13)=O)=CC=C  
 PUGREST.BadRequest: error:  
O=C(N[C@@H]1C2=CCC(NC)=CC=C2C3=C(CC1)C=C(OC)C(OC)=C3OC)ON=N  
 PUGREST.BadRequest: error:  
N([C@H]1CCCC2=CC(OC)=C(OC)C(OC)=C2C3=CC=C(NC)C(C=C13)=O)CNC(=O)OCCONC  
 PUGREST.BadRequest: error:  
O=C(N[C@H]1CCCC2=C3C(OC)=C(OC)C(OC)=C2C4=CC=C(NC)C(C=C14)=O)CCOC3  
 PUGREST.BadRequest: error:  
O=C(N[C@H]1CCCC2=CC(OC)=C(OC)C(OC)=C2C3=CC=C(NC)C(=O)C=C31)CCOC(=O)O  
 PUGREST.BadRequest: error:  
C=C1CC[C@@H]1(C2=CCC(OC(C3=CC=CC=C3)=O)=CC=C2C=C1C=COC)C(OC)=COC=O  
 PUGREST.BadRequest: error:  
C1=CCC[C@H]1(NC(=S)NC2=CC=C(C=C2)C(F)(F)F)CC(C1)=CC=C(NC)C(=O)COCOC  
 PUGREST.BadRequest: error:  
COC1=CC2=CC=C(NC)C(C=C2[C@@H]1(NC(=O)NC3=CC=CC=C3)CCC1=CC(=COC)O)C=O  
 PUGREST.BadRequest: error:  
C1=C2CC[C@@H]1(C3=CCC(SC)=CC=C3C2=C(OC)C(=C1OC)OC=O)NCC4=C(C=CC=C4)O  
 PUGREST.BadRequest: error:  
COC1=CC2=C3C=C(NC)C(=O)C=C2[C@@H]1(NC(=S)N(CCO)CCCC)C3=CC(OC)=C1OC  
 PUGREST.BadRequest: error:  
COC=CC1=C(C2=CC=C(SC)CC=C2[C@H]1(CC1)NC(=O)NC3=CC=C(F)C)C3=O  
 PUGREST.BadRequest: error:  
C1=C2CC[C@@H]1(C3=CCC(SC)=CC=C3C2=C(OC)C(=C1OC)OC=O)NC(=O)NC4=CC=CC=C4  
 PUGREST.BadRequest: error:  
C=C1C2C[C@H]1(N3C=C(COC(=O)C4=CC=CC=C4C1)N=N3)C5=CC(C(NC)=CC=C5C2=CC1O)C=O  
 PUGREST.BadRequest: error:  
C=CC1=C(C2=C(OC)C(OC)=C1OC(OCC)=O)CC[C@H]1(NC(C)=O)C3=CC(C(SC)=CC=C23)=O  
 PUGREST.BadRequest: error:  
O=CC(=CC1=CC[C@H]1(CCC2=CC(OC)=C(OC)C(OC(=O)C)=C21)CC=O)OSC  
 PUGREST.BadRequest: error:  
C1[C@@H]1(C2=CC(C(SC)=CC=C2C3=C(OC)C(OC)=C(C=C3CC)OCNCC)=O)C1NC=O  
 PUGREST.BadRequest: error:  
C[C@@H]1(C1=CCC(OC(OC)=O)=CC=C1C2=C(OC)C(OC)=C(OC)C=C2CN)C(C)=O  
 PUGREST.BadRequest: error:  
OCC(C(C1)=O)N(N=N1)[C@H]1CCCC3=CC(OC)=C(OC)C(OC)=C3C4=CC=C(NC)C(=O)C=C24  
 PUGREST.BadRequest: error:  
CNCC(O)(C)C1=CN(N=N1)[C@H]1CCCC3=CC(OC)=C(OC)C(OC)=C3C4=CC=C(C(=O)C=C24)NC  
 PUGREST.BadRequest: error:  
O1C=C(NC)CC=C1CN[C@H]1CCCC3=CC(OC)=C(OC)C(OC)=C3C4=CC=C(SC)C(C=C24)=O  
 PUGREST.BadRequest: error:

N=1C(=CN(N=1) [C@H1] 2CCC3=CC(OC)=C(OC)C(OC)=C3C4=CC=C(NC)C(C=C24)=O)C=O  
 PUGREST.BadRequest: error:  
 C=CC=C(C(=O)OC=CC1=CC([C@H1](NC(C)=O)CCC2=CC(OC)=C(OC)C(OC)=C21)SC=C)C  
 PUGREST.BadRequest: error:  
 N1([C@H1] 2CCC3=C(C(OC)=C(OC)C(OC)=C3)C4=CC=C(NC)C(C=C24)=O)C(C1)=C1  
 PUGREST.BadRequest: error:  
 N1([C@H1] 2CCC3=C(C(OC)=C(OC)C(OC)=C3)C4=CC=C(NC)C(C=C42)=O)C=C1C1  
 PUGREST.BadRequest: error:  
 N1([C@H1] 2CCC3=C(C(OC)=C(OC)C(OC)=C3)C4=CC=C(NC)C(C=C42)=O)C(C1)=C1  
 PUGREST.BadRequest: error:  
 O=CC1=CN(N=N1) [C@H1] 2CCC3=CC(OC)=C(OC)C(OC)=C3C4=CC=C(NC)C(=O)C=C24  
 PUGREST.BadRequest: error:  
 C1N([C@H1] 2CCC3=CC(OC)=C(OC)C(OC)=C3C4=CC=C(NC)C(=O)C=C24)CC(OC)=C1  
 PUGREST.BadRequest: error:  
 N1([C@H1] 2CCC3=C(C(OC)=C(OC)C(OC)=C3)C4=CC=C(NC)C(C=C24)=O)C(O)=C1C  
 PUGREST.BadRequest: error:  
 N1([C@H1] 2CCC3=C(C(OC)=C(OC)C(OC)=C3)C4=CC=C(NC)C(C=C24)=O)C(O)=C1  
 PUGREST.BadRequest: error:  
 O=CC1=CN(N=N1) [C@H1] 2CCC3=CC(OC)=C(OC)C(OC)=C3C4=CC=C(NC)C(=O)C=C42  
 PUGREST.BadRequest: error:  
 C1N([C@H1] 2CCC3=CC(OC)=C(OC)C(OC)=C3C4=CC=C(C(C=C42)=O)NCC=C)C(OC)=C1OC  
 PUGREST.BadRequest: error:  
 N([C@H1] 1CCC2=C(C(OC)=C(OC)C(OC)=C2)C3=CC=C(NC)C(C=C13)=O)NC=CC=CC1  
 PUGREST.BadRequest: error:  
 N1([C@H1] 2CCC3=C(C(OC)=C(OC)C(OC)=C3)C4=CC=C(NC)C(C=C42)=O)C=C1I  
 PUGREST.BadRequest: error:  
 N(CCCC)CC1=CN(N=N1) [C@H1] 2CCC3=C(C(OC)=C(OC)C(OC)=C3)C4=CC=C(NC)C(=O)C=C24  
 PUGREST.BadRequest: error:  
 C1=C(O)C(OC)=CC(CN[C@H1] 2CCC3=C(C(OC)=C(OC)C(OC)=C3)C4=CC=C(SC)C(=O)C=C42)=C1C  
 PUGREST.BadRequest: error:  
 N(C(C)C)(C(C)C)C(=O)N[C@H1] 1CC(C2=C(C(OC)=C(OC)C=C2CC1)OC)(CC)OCC=C(NC)C(C)=O  
 PUGREST.BadRequest: error:  
 N(C)C[C@H1](C1=CC(C(NC)=CC=C1C2=C(OC)C(OC)=C(C=C2CC)OCNCC)=O)C=C  
 PUGREST.BadRequest: error:  
 C1=2[C@H1](OC1)CCCC=C(C3=C(OC)C(OC)=C(OC)C=C3CC=CC=CNC)C(C=2)=O  
 PUGREST.BadRequest: error:  
 N(CCCC)CC1=CN(N=N1) [C@H1] 2CCC3=C(C(OC)=C(OC)C(OC)=C3)C4=CC=C(NC)C(C=C24)=O  
 PUGREST.BadRequest: error:  
 C1=C(OC)C(=C(OC)C=C1CC[C@H1](NC(C(O)=O)C(=O)OCC=CC(OC)=C(OC)C=C)OCNC)O  
 PUGREST.BadRequest: error: C12=C(NC)CC([C@H1](C3N=NC03)C=C1OC=CCC2SC)=O  
 PUGREST.BadRequest: error:  
 C1=C(OC)C(=C(OC)C=C1CC[C@H1](NC(C(OCC)=O)=C(NCO)OOC2=CCC(NC)=CC=C2)ON)C  
 PUGREST.BadRequest: error:  
 N1(CCCC)CC2=CN(N=N2) [C@H1] 3CCC4=CC(OC)=C(OC)C(OC)=C4C5=CC=C(C(C=C53)=O)NCC=C1  
 PUGREST.BadRequest: error:  
 N(C)C(=O)NCCC(OCC(C=C1[C@H1](CCC2=CC(OC)=C(OC)C(OC)=C2C1=CCN)C(C)=O)S)C=O  
 PUGREST.BadRequest: error:  
 C1=C(OC2)C(=CC=C1C3=CC(OC)=C(OC)C=C3CC4[C@H1](CCC=CC=C4COC(C)=O)C2OCOC)ONC

PUGREST.BadRequest: error:  
 C1[C@H1](C2=CCC(SC)=CC=C2C3=C(OC)C(OC)=C(C=C3C1)OC)ONC  
 PUGREST.BadRequest: error:  
 C12=CC=C(NC)C(C=C1[C@@H1](NCC)CCCC=CC(OC)=C(OC)C(OC)=C2)SC=O  
 PUGREST.BadRequest: error:  
 C1[C@@H1](C2=CC(C(NC)=CC=C2C3=C(OC)C(OC)=C(C=C3C1)O)C)ONCC  
 PUGREST.BadRequest: error:  
 N=CC(C(OC(OCC)=O)=CC=CC1=C(OC)C(OC)=COC)C=C1CC[C@H1](NCCC)C=O  
 PUGREST.BadRequest: error:  
 COCC(C)=C(C(OC)=CCCC[C@H1](NCC)C1=CC(C(SC)=CC=C1)=O)OC  
 PUGREST.BadRequest: error:  
 C=CC(N[C@H1]C1CC2=C(C(OC)=C(OC)C(OC)=C2)C3=CC=C(NC)C(=O)C=C31)OO  
 PUGREST.BadRequest: error:  
 COC1C(C)=C(C=2C3=CC=C(SC)CC=C3[C@H1]CCC=2C=C1)NCNCCOOOC  
 PUGREST.BadRequest: error:  
 C1[C@@H1](C2=CC(C(NC)=CC=C2C3=C(OC)C(OC)=C(C=C3C1)OC=O)N)CCO  
 PUGREST.BadRequest: error:  
 CC1=C2C(=C(OC)C(OC)=C1C3=CC=C(NC)C(C=C3[C@H1](C2)NC)C)OONC  
 PUGREST.BadRequest: error:  
 COC1=C(OC)C=2C3=CC=C(SC)CC=C3[C@H1](CCC=2C=C1OC)NCC4=CC=CC=C4O  
 PUGREST.BadRequest: error:  
 C[C@H1](CCC1=CC(OC)=C(OC)C(OC)=C1C2=CC=C(C(=O)C=C2)NCN)CCO  
 PUGREST.BadRequest: error:  
 NC(=O)N1[C@@H1]C2=CC(C(NC)=CC=C2C3=C(OC)C(OC)=C(OC)C=C3CC1)=O  
 PUGREST.BadRequest: error:  
 NN(CCO)[C@@H1]1C2=CC(C(NC)=CC=C2C3=C(OC)C(OC)=C(C=C3CC1)OC)=O  
 PUGREST.BadRequest: error:  
 C1=2[C@H1](CCC3=CC(OC)=C(OC)C(OC)=C3C1=CC=C(NC)C(=O)C=2NC)CO  
 PUGREST.BadRequest: error:  
 C12=CC(C=CC=C1C3=C(OC)C(OC)=C(OC)C=C3CC[C@@H1]2NCC=CC=CC=C)SCC  
 PUGREST.BadRequest: error:  
 N=C1C(C(OC(C)=O)CCC2=C(OC)C(OC)=C(OC)C=C2CC[C@H1]1)N=O  
 PUGREST.BadRequest: error:  
 NC1(N=CC=C1S)[C@H1]2CCC3=CC(OC)=C(OC)C(OC)=C3C4=CC=C(C(C=C24)N)C=O  
 PUGREST.BadRequest: error:  
 NC(N=NCOCCC)C[C@H1]1C2=CC(C(NC)=CC=C2C3=C(CC1)C=C(OC)C(OC)=C3OC)=O  
 PUGREST.BadRequest: error:  
 CCCCC=1N2[C@@H1]CC(C3=C(C(OC)=C(OC)C=C3C2=C)C=C)(SC)C(C=1)=O  
 PUGREST.BadRequest: error:  
 C1C2(C3=C(OC)C(OC)=C(OC)C=C3CC[C@@H1]1NC(N)C)C=CC=C(C(C2)=O)NC  
 PUGREST.BadRequest: error:  
 C1C2(C3=C(OC)C(OC)=C(OC)C=C3CC[C@@H1]1NC(N)=NC)C=C(C(=O)C2)NC  
 PUGREST.BadRequest: error:  
 C1=2C(C3=C(OC)C(OC)=C(OC)C=C3CC[C@@H1]1NC(C)CC)=CC=C(NC)C(=O)C=2NC  
 PUGREST.BadRequest: error:  
 C12=C(C=CN(NC1)OC3=CC=C(NC)CC=C3[C@H1](NC(C)=O)CC)CC(OC)=C2OC=O  
 PUGREST.BadRequest: error:  
 C1=C(CN[C@H1]2CCC3=CC(OC)=C(OC)C(OC)=C3C4=CC=C(NC)C(=O)C=C42)C=NC=C1

PUGREST.BadRequest: error:  
N(C1=CC=C(C=C1)C1)C=CN(OC=CC=CC=C)C=CC(N2C)=C(C(OC)=CC=CC=CC2C)[C@H1]SOC  
PUGREST.BadRequest: error:  
C1[C@H1](NC(N=2)=N)CC(C3=C(C(OC)=C(OC)C=C3C1)OC)=CC=C(NC)C(C=2)=0  
PUGREST.BadRequest: error:  
C1=C(C(C=C2[C@H1](CCC3=CC(OC)=C(OC)C(OC)=C3C2=C1)NC(C)C)=0)NC  
PUGREST.BadRequest: error:  
N(C1=CC=C(C=C1)C1)C=CN(OC=CC=CC=C)C=CC(N2C)=C(C(OC)=CC=CC=CC2C)[C@H1]NOC=0  
PUGREST.BadRequest: error:  
C12=C[C@@H1](NC(N(C)C)=0)CCC3=CC(OC)=C(OC)C(OC)=C3C1=CC=C(NC)C2=0  
PUGREST.BadRequest: error:  
C1=C(CN[C@H1]2CCC3=CC(OC)=C(OC)C(OC)=C3C4=CC=C(NC)C(=0)C=C42)C=NC=CC1  
PUGREST.BadRequest: error:  
C=1C=C(NC)C(C=C2C=1C3=C(OC)C(OC)=C(OC)C=C3CC[C@@H1]2NC(N(C)C)=0)SNC  
PUGREST.BadRequest: error:  
C1CN[C@@H1]2C3=CC(C(NC)=CC=C3C4=C(C(OC)=C(OC)C=C4CC2)OC=0)C=C1  
PUGREST.BadRequest: error:  
N=1[C@@H1]2C3=CCC(SC)=CC=C3C4=C(OC)C(OC)=C(C=C4CC2)OC=CC=1C  
PUGREST.BadRequest: error:  
C1[C@H1](NC(NC2=CC=C(C=C2)F)=0)C3=CC(C(NC)=CC=C3C4=C(OC)C(OC)=CC=C4OCC1)=0  
PUGREST.BadRequest: error:  
C=1C=C(NC)C(C=C2[C@H1](CCC3=CC(OC)=C(OC)C(OC)=C3C2=1)CCC=0)C  
PUGREST.BadRequest: error:  
C=12C=C(NC)C2(C=C3C=1C4=C(OC)C(OC)=C(OC)C=C4CC[C@@H1]3NC(N(CC)CC)=0)NC  
PUGREST.BadRequest: error:  
C1=CC(=CC=N1)CCN[C@@H1]2C3=CC(C(SC)=CC=C3C4=C(CC2)C=C(OC)C(OC)=C4OC)=0  
PUGREST.BadRequest: error:  
C=CC=C(NC(=0)C=CC=C1C2=C(OC)C(OC)=C(OC)C=C2CC[C@H1](NC(C)=0)C1=C)SC=0  
PUGREST.BadRequest: error:  
N=NC(CNC(=0)OC)=C=C(CCO[C@H1]CCC1=CC(OC)=C(OC)C(OC)=C1C2=CC=CNC)C(=0)C=C2  
PUGREST.BadRequest: error:  
C1=2[C@H1]CCC3=CC(OC)=C(OC)C(OC)=C3C1=CC=C(C(=0)C=2)NCNC(C)=0  
PUGREST.BadRequest: error:  
CC=C1C2=C(C=C(OC)C(OC)=C2OC(CC)=0)C[C@H1](NC(C)=0)C=CC(C(SC)=CC=C1)=0  
PUGREST.BadRequest: error:  
C1=2[C@H1]CCC3=CC(OC)=C(OC)C(OC)=C3C1=CC=C(C(C=2)=0)NCNC(C)=0  
PUGREST.BadRequest: error:  
C1[C@@H1](CC(C2=C(C(OC)=C(OC)C=C2C1)OC)=CC=C(SC)C(C)=0)NC(C)=0  
PUGREST.BadRequest: error:  
CC1[C@H1](NC(=0)NC2=CC=C(C(F)(F)F)C=C2C3=CCC(NC)=CC=C3C=C(OC)C(OC)=C(C=C1)OO)C  
PUGREST.BadRequest: error:  
C12C=CC3=C(C=C(OC)C(OC)=C3OC(C)=0)[C@H1](NC(C)=0)C1=CC(C(SC)=C2)=0  
PUGREST.BadRequest: error:  
CC=CC1=C(C=C(OC)C(OC)=C1OC(OCC)=0)CC[C@H1](NC(C)=0)C2=CC(C(SC)=CC=C2)=0  
PUGREST.BadRequest: error:  
C=CC=C(NC1CCC=CN=C(CC)CC=C1[C@H1]CCC2=CC(OC)=C(OC)C(OC)=C2)ONC  
PUGREST.BadRequest: error:  
C=CC=C(NC([C@@H1]C1=CCC(SC)=CC=C1C2=C(OC)C(OC)=C(OC)C=C2CC)=0)NC=0



PUGREST.BadRequest: error:  
O=C1C=C2[C@H1](CCC3=C(C(OC)=C(OC)C(OC)=C3)C2=CC=C1SC)NC(N(C(C)C)C(C1)=O)NC

PUGREST.BadRequest: error:  
O=C1C=C2[C@H1](CCC3=C(C(OC)=C(OC)C(OC)=C3)C2=CC=C1SC)NC(C(=O)OCC)=CNC

PUGREST.BadRequest: error:  
N=NC(CNC(=O)OC)=C=C(C=CC=CNCC=CC1)C(OC)C(OC)=C(OC)C=C1CC[C@H1](NC(=O)C)C=CC

PUGREST.BadRequest: error:  
C1=C2CC[C@H1](NC(N(C)C)=O)C3=CC(C(NC)=CC=C3C2=C(OC)C(OC)=C1OC)NC(C)=O

PUGREST.BadRequest: error:  
O=C1C=C2[C@H1](CCC3=C(C(OC)=C(OC)C(OC)=C3)C2=CC=C1SC)NC(C(C)C)=O

PUGREST.BadRequest: error:  
N1=NC(COC(=O)C2=CC=NC=C2)=CN1NCC=CC3C4=CC=C(NC)CC=C4[C@H1]CCC3=CCNCOCC

PUGREST.BadRequest: error:  
N1C=NN=NN1[C@H1]2CCC3=C(C(OC)=C(OC)C(OC)=C3)C4=CC=C(C(C=C42)=O)NCCC

PUGREST.BadRequest: error:  
CNCC(OC1=2)=C(OC)C=3CC([C@H1](CCC=3C=C1OC)NC(N(C)C)=O)OC(=CC=2)NC=O

PUGREST.BadRequest: error:  
CNC=1C(=O)C=C2[C@H1](CCC3=CC(OC)=C(OC)C(OC)=C3C2=CC=1N)C(C(C)C)=O

PUGREST.BadRequest: error:  
N=NC(CNC(=O)OC)=C=C(C=CC=CNCC=C1C)C2(NC)C(C(O)=CC2[C@H1]NC(C)=O)CCC1SCOCC

PUGREST.BadRequest: error:  
O=CC(NC)=CC=C1C([C@H1](CCC2=CC(OC)=C(OC)C(OC)=C21)N=[N+1])=[N-1]

PUGREST.BadRequest: error:  
N([C@H1]1CCC2=CC(OC)=C(OC)C(OC)=C2C3=CC=C(NC)C(C=C31)=O)CCCCF

PUGREST.BadRequest: error:  
C[C@H1](CCC1=CC(OC)=C(OC)C(OC)=C1C2=CC=C(C(C=C2)=O)SC)NC/C=C/C3=CC=CC=C3

PUGREST.BadRequest: error:  
O=CC(NC)=C1C2=CC([C@@H1](N=[N+1]=[N-1])CCC3=CC(OC)=C(OC)C(OC)=C32)NC=CC1

PUGREST.BadRequest: error:  
N([C@H1]1CCC2=C(C(OC)=C(OC)C(OC)=C2)C3=CC=C(SC)C(C=C31)=O)CCCCO

PUGREST.BadRequest: error:  
O=CC(NC)=CC=CC1([C@H1](CCC2=CC(OC)=C(OC)C(OC)=C21)N=[N+1]=[N-1])O

PUGREST.BadRequest: error:  
C1NC(CNC(=O)OCCN=N1)CC2=CC(OC)=C(OC)C(OC)=C2C3=CC=C(NC)C(=O)C=C3

PUGREST.BadRequest: error:  
O=CC(NC)=CC=C1C([C@H1](CCC2=CC(OC)=C(OC)C(OC)=C21)N=[N+1]=[N-1])O

PUGREST.BadRequest: error:  
C=CC=C(C(=O)OCC1=CN(N=N1)[C@H1]2CCC3=CC(OC)=C(OC)C(OC)=C3C4=CC=C(NC)CC=C24)O

PUGREST.BadRequest: error:  
C=CC1=C(C(=O)OC=CC=C2C3=C(OC)C(OC)=C(OC)C=C3CC[C@H1](NC(C)=O)C2=C1SC)C

PUGREST.BadRequest: error:  
C=C1C2=C(C=C(OC)C(OC)=C2OC(OCC)=O)CC[C@H1](NC(C)=O)C3=CC(C(NC)=CC=C13)=O

PUGREST.BadRequest: error:  
C=CC=CC(=O)OC1=C(C(OC)=CCCC[C@H1](NC(C)=O)C2=CC(C(SC)=CC=C21)=O)C

PUGREST.BadRequest: error:  
OCC(C1(C)OCN)=NN(C1)[C@H1]2C3=CC(C(NC)=CC=C3C4=C(CC2)C=C(OC)C(OC)=C4OC)=O

PUGREST.BadRequest: error:  
OCC(C1(C)OCN)=NN(C1)[C@H1]2C3=CC(C(NC)=CC=C3C4=C(OC)C(OC)=C(C=C4CC2)OC)=O

PUGREST.BadRequest: error:  
C1=2[C@H1](CCC3=C(C(OC)=C(OC)C(OC)=C3)C1=CC=C(C(C=2)=O)SCNCC)OC=C  
PUGREST.BadRequest: error:  
CC=CC(N[C@H1]1CCC2=C(C(OC)=C(OC)C(OC)=C2)C3=CC=C(SC)C(C=C13)=O)CCOC  
PUGREST.BadRequest: error:  
OC(=O)NCC1=CN(N=N1)[C@@H1]2C=3C(C4=C(C(OC)=C(OC)C=C4CC2)OC)=CC=C(NC)C(C=3)=O  
PUGREST.BadRequest: error:  
O(C=C(OC=1)CC2=CC=C(NC)CC=C2[C@@H1](N3C(C(O)=O)=C(N=N3)C(O)=O)CCC=1C=COC=O)C  
PUGREST.BadRequest: error:  
N(C)C=1C(=O)C=C2[C@H1](CCC3=C(C(OC)=C(OC)C(OC)=C3)C2=CC=1)N4C(C(=O)O)C=CN=C4NC  
PUGREST.BadRequest: error:  
C1=C(OC)C(=C(OC)C=C1CC[C@H1](NC(C(=O)OCC)=C(COCC)OCCC(NC)=CC=CON)C=C)NC  
PUGREST.BadRequest: error: N(C)C=1C(=O)C=C2[C@H1](CCC3=C(C(OC)=C(OC)C(OC)=C3)C2=CC=1)N4C(C(=O)O)=C(N=N4)C(=O)NNC  
PUGREST.BadRequest: error: N1(C)C=2C(=O)C=C3[C@H1](CCC4=C(C(OC)=C(OC)C(OC)=C4)C3=CC=2)NC(C(=O)O5)C=CN=C5C=C1NC  
PUGREST.BadRequest: error:  
C1[C@H1](NCC)CC2=CC(C(SC)=CC=C2C3=C(C(OC)=C(OC)C=C3CC1)OC(C)=O)CC=O  
PUGREST.BadRequest: error:  
C12[C@H1](NCC)CC3=CC(C(SC)=CC=C3C4=C(C(OC)=C(OC)C=C4CC1)OC=C2NCC)=O  
PUGREST.BadRequest: error:  
C=C(NC)C1C([C@H1](CCC2=CC(OC)=C(OC)C(OC)=C21)NC(NC3=CC=C(C=C3)F)=O)PNC=O  
PUGREST.BadRequest: error:  
O(C1=C(OC=2)C=3CC([C@@H1](N4N=NC(C(O)=O)=C4CO)OCCC=2C=C1)OC=CCC(NC)=CC=3)OC  
PUGREST.BadRequest: error: O=C(NC=C1C=C(C(F)(F)F)CC=C1)N[C@@H1]2C=3C(C4=C(C(OC)=C(OC)C=C4CC2)OC)=CC=C(NC)C(C=3)=O  
PUGREST.BadRequest: error: O=C(C=C(C(OC1)=O)N(N=N1)[C@@H1]2C=3C(C4=C(C(OC)=C(OC)C=C4CC2)OC)=CC=C(NC)CC=3)OCOC=CC=CO  
PUGREST.BadRequest: error: O=C(C=C(C(OC1)=O)N(N=N1)[C@@H1]2C=3C(C4=C(C(OC)=C(OC)C=C4CC2)OC)=CC=C(NC)CC=3)OC5OCCCC5=O  
PUGREST.BadRequest: error:  
O=C(C=C(C(O)CCCCC)[C@H1]1CC)C2=C(C(OC)=C(OC)C(OC)=C2)C3=CC=C(NC)C(C=C31)=O  
PUGREST.BadRequest: error: O=C(C=C(C(O1)CCCCC1)CN=N)N[C@H1]2CCC3=CC(OC)=C(OC)C(OC)=C3C=4C2=CC(C(NC)=CC=4)=O  
PUGREST.BadRequest: error:  
N([C@H1]1CCC2=C(C(OC)=C(OC)C(OC)=C2)C3=CC=C(NC)C(=O)C=C13)CNCC4=CC=C(C=C4)C=O  
PUGREST.BadRequest: error: O=C(C=C(C1)C1=CN(N=N1)C(=S)N[C@@H1]2C=3C(C4=C(C(OC)=C(OC)C=C4CC2)OC)=CC=C(NC)CC=3)OC(O)=O  
PUGREST.BadRequest: error: O=C(C=C(C1)C=CN([C@H1]1CCC2=C(C(OC)=C(OC)C(OC)=C2)C3=CC=C(NC)C(C=C13)=O)OC(=O)CC)NC(OC4=CC=CC=C4)=O  
PUGREST.BadRequest: error: O=CC(=CC=C1C([C@@H1](N2C(C(O)=O)=C(N=N2)C(O)=O)CCC3=CC(OC)=C(OC)C(OC)=C31)=C)NC=O  
PUGREST.BadRequest: error:  
O=CC(=C1C=C2C[C@H1](CCC3=CC(OC)=C(OC)C(OC)=C32)NC(C(=O)OCC)=C(NCC)OON=C1)NC  
PUGREST.BadRequest: error:  
N=1C(=C(C(=O)O)NCCN=NN(C=1)[C@H1]2CCC3=CC(OC)=C(OC)C(OC)=C3C4=CC=C(NC)CC=C42)OC  
PUGREST.BadRequest: error: NC(=CN/C(=NC(O)C=CCI)C1=CN(NC12)C=CC3=CC(NC)=CC(OC)=C3C=CC(OC4)C(OC)=CC5=C4)C=CC=CC5S[C@@H1]2NC

PUGREST.BadRequest: error: OC(\N[C@H1]1CCC2=CC(OC)=C(OC)C(OC)=C2C3=CC=C(C(=O)C=C31)OC(=O)N)(C[C@@H1])C4=CCC(OC)=C4CCO

PUGREST.BadRequest: error: CNCC(O)(C1OC=CC=C1N=NNC)[C@H1]2C3=CC(C(NC)=CC=C3C4=C(OC)C(OC)=C(C=C4CC2)OC)=O

PUGREST.BadRequest: error: O=C1C(=CC=C2C([C@H1](CCC3=CC(OC)=C(OC)C(OC)=C32)N4C(C(=O)OCC)=C(N=N4)CC1=O)N)C

PUGREST.BadRequest: error: O=C1C(=CC=C2C([C@@H1](N3C(C(=O)O)=C(C(O)=O)N=N3)CCC4=CC(OC)=C(OC)C(OC)=C42)=C1)NC=O

PUGREST.BadRequest: error: CNCC(O)(C1OC=CC=C1C=2N=NNC=2)[C@H1]3CCC4=CC(OC)=C(OC)C(OC)=C4C5=CC=C(C(=O)C=C53)NC

PUGREST.BadRequest: error: N=1C(=C(C(=O)O)NCCN=NN(C=1)[C@H1]2CCC3=CC(OC)=C(OC)C(OC)=C3C4=CC=C(NC)CC=C42)O

PUGREST.BadRequest: error: CC(C)(C)OC(=O)/N=C(/N[C@H1]1CCC2=C(C(OC)=C(OC)C(OC)=C2)C3=CC=C(NC)C(C=C31)=O)NCOC(C)=O

PUGREST.BadRequest: error: C1(=CC=C1NCOCC)C=2N=NN(C=2)[C@H1]3CCC4=CC(OC)=C(OC)C(OC)=C4C5=CC=C(NC)C(C=C53)=O

PUGREST.BadRequest: error: CC(C)(C)OC(=O)/N=C(/N[C@H1]1CCC2=C(C(OC)=C(OC)C(OC)=C2)C3=CC=C(NC)C(C=C13)=O)NCOC(C)(F)F

PUGREST.BadRequest: error: C1(OC(C=C(N1[C@H1]2CCC3=C(C(OC)=C(OC)C(OC)=C3)C4=CC=C(NC)C(C=C24)=O)CC)CC)=CO

PUGREST.BadRequest: error: CC(C)(C)OC(=O)/N=C(/N[C@H1]1CCC2=C(C(OC)=C(OC)C(OC)=C2)C3=CC=C(NC)C(=O)C=C31)N=N

PUGREST.BadRequest: error: N([C@H1]1CCC2=CC(OC)=C(OC)C(OC)=C2C3=CC=C(NC)CC=C13)=O

PUGREST.BadRequest: error: O=C(CNC=C1C(C2=C(OC)C(OC)=C(OC)C=C2CC[C@@H1]1NC=CC=C(OC)C(=O)CSC

PUGREST.BadRequest: error: CNC(CNC(=O)OCCN[C@H1]1)CCC2=CC(OC)=C(OC)C(OC)=C2C=3C1=CC(C(=CC=3)NC)=O

PUGREST.BadRequest: error: C12=C3C(C4=C(OC)C(OC)=C(OC)C=C4CC[C@@H1]3NC(=O)N)=CC=C1NC=C2

PUGREST.BadRequest: error: CC(C)C(=O)OCCC=C1[C@H1](CCC2=CC(OC)=C(OC)C(OC)=C2C1=CCN)SC=O

PUGREST.BadRequest: error: C=1C(C)(C)C(OC2=CC=CC3=C(OC)C(OC)=C(OC)C=C3CC[C@H1](NC(=O)C)C2=CC=1O)SC

PUGREST.BadRequest: error: CC(C)(C)COC1=CC=C2C3=C(OC)C(OC)=C(OC)C=C3CC[C@@H1](C2=CC1=O)SC=O

PUGREST.BadRequest: error: O=C(C=CNCC(=O)OCCN[C@H1]1)CCC2=C(C(OC)=C(OC)C(OC)=C2)C3=CC=C(NC)C(=O)C=C13

PUGREST.BadRequest: error: C1=2[C@H1]CCC3=CC(OC)=C(OC)C(OC(CC)=O)=C3C1=CC=C(C(C=2)=O)SCNC(=O)CSC

PUGREST.BadRequest: error: OC(CCC(C)C)OCC1=CN(N=N1)[C@H1]2CCC3=CC(OC)=C(OC)C(OC)=C3C4=CC=C(NC)C(=O)C=C24

PUGREST.BadRequest: error: O=CCN(CC=C)N(OCC)O[C@H1]1CCC2=CC(OC)=C(OC)C(OC)=C2C=CC=C(NC)C(=O)C=C1

PUGREST.BadRequest: error: N([C@@H1]1C=2CC3=C(C(OC)=C(OC)C=C3CC1)OC=CC=C(NC)CC=2)=O

PUGREST.BadRequest: error: OC(CCC(C)C)OCC1=CN(N=N1)[C@H1]CCC2=CC(OC)=C(OC)C(OC)=C2C=CC=C(C(C)N)C

PUGREST.BadRequest: error:  
C=C1C(C2=C(C=C(OC)C(=C2OC)OC)CC[C@@H1]1N3C=C(N=N3)C4=CC=CC=C4)=CC=C(NC)C=O

PUGREST.BadRequest: error:  
C=C1C([C@H1](CCC2=CC(=C(OC)C(=C21)OC)OC)NCCCCCCCCCCC)C=CC(CNC)=O

PUGREST.BadRequest: error:  
C=C1C(C2=CC=C(C(=O)C=C2[C@H1](CC1)N3C=C(N=N3)C=CC=CC=N)C=C)OCNC(OC)=O

PUGREST.BadRequest: error:  
OC1=C(C=CC=C1)C=2N=NN(C=2)[C@H1]3CCC4=CC(OC)=C(OC)C(OC)=C4C5=CC=C(NC)C(=O)C=C35

PUGREST.BadRequest: error:  
NC(=C(N=NCC(=O)CCC=C1N=CC(C(OC(C)=O)=CC=C1C2=C(OC)C)(OC)COC)C)C2CCOF

PUGREST.BadRequest: error:  
N1=CC=C(C2=C1)COC3=CC=C4C5=C(OC)C(OC)=C(OC)C=C5CC[C@@H1](C4=CC3=O)N2

PUGREST.BadRequest: error:  
NC1=CN(N=N1)[C@H1]2CCC3=C(C(OC)=C(OC)C(OC)=C3)C4=CC=C(NC)C(C=C24)=O

PUGREST.BadRequest: error:  
NC1=C(N=NC1C(=O)CCC=CC=C2C3=C(OC)C(OC)=C(OC)C=C3CC[C@H1](CC2N)CN)C=O

PUGREST.BadRequest: error:  
C[C@@H1](C1=CCC(SC)=CC=C1C2=C(OC)C(OC)=C(C=C2CC)OCOC=CCSC=O)O

PUGREST.BadRequest: error:  
N=C=C(N=NC(C(C)OC)[C@H1]CCC1=CC(OC)=C(OC)C(OC)=C1C2=CC=C(NC)C=O)C=C2

PUGREST.BadRequest: error:  
C=C1C(C2=C(C(=C(OC)C=C2CC[C@@H1]1N3C=C(N=N3)C4=CC)CC)N4O)COC=CC=C(CON)C

PUGREST.BadRequest: error:  
C=C1C(C2=CC=CC(=O)C=C2[C@@H1](N3C=C(N=N3)C4=CC=CC=N4)CC1)NC=C(OC)C(OC)SCOC

PUGREST.BadRequest: error:  
C1=C2C(C3=C(C=C(OC)C=C3CC[C@@H1]2N4C=C(N=N4)C=CC)OCOC)OC=CC=C(C1=O)C

PUGREST.BadRequest: error:  
C=C1C([C@H1](CCC2=CC(=C(OC)C(=C21)OC)OC)NCCCCCCCCCCC)C=CCC(NC)=O

PUGREST.BadRequest: error:  
C=1=C2C(C3=C(C=C(OC)C=C3CC[C@@H1]2N4C=C(N=N4)C=CC)OCOC)OC=CC=CC=1O

PUGREST.BadRequest: error:  
C1=C2C(C3=CC=CC(=O)C=C3[C@H1](CC2)N4C=C(N=N4)C=CC=CC=N)(OC)C(OC)=C1OCNC

PUGREST.BadRequest: error:  
C=C1C2(C3=C(C=C(OC)C=C3CC[C@@H1]1N4C=C(N=N4)C=CC)OCOC)OC=CC=C(NC)C2=O

PUGREST.BadRequest: error:  
C1=C2C(C3=C(C=C(OC)C=C3CC[C@@H1]2N4C=C(N=N4)C=CC)OCOC)OC=CC=C(C1=O)NC

PUGREST.BadRequest: error:  
C=C1C(C2=C(C=C(OC)C=C2CC[C@@H1]1N3C=C(N=N3)CCC)COC)C=CC=C(NC)C=O

PUGREST.BadRequest: error:  
C=C1C(C2=CC=C(C(=O)C=C2[C@@H1](N3C=C(N=N3)C4=NC=CC=C4)CC1)NC)=C(OC)C(OC)=COC

PUGREST.BadRequest: error:  
C1=C2C(C3=CC=C(C(C=C3[C@H1](CC2)N4C=C(N=N4)C5=NC=CC=C5O)N)C=C)(C(=C1OC)OC)OC

PUGREST.BadRequest: error: C12=CC([C@@H1]1NCC3=CC=C(C)C=C3CCCC)C(SC)=CC2O

PUGREST.BadRequest: error:  
O=C(OC)CN(CCO)N[C@H1]1CCC2=CC(OC)=C(OC)C(OC)=C2C3=CC=C(NC)C(=O)C=C13

PUGREST.BadRequest: error:  
O=C(O)C=C(OC)CC=C1C(C2=C(OC)C(OC)=C(OC)C=C2C=3C[C@@H1]1N=CC=3S)C

PUGREST.BadRequest: error:

O=C(O)C=C(OC)CC=C1C(C2=C(OC)C(OC)=C(OC)C=C2C=3C[C@@H1]1N=CC=3SC)=O  
PUGREST.BadRequest: error:  
O=C(C)N[C@@H1]1CC(C2=C(C(OC)=C(OC)C=C2CC1)OC(CC)=O)=CC=C(SC)C(=O)C  
PUGREST.BadRequest: error:  
O=C(O)C=C(OC)CC=C1C(C2=C(OC)C(OC)=C(OC)C=C2C=3C[C@@H1]1N=CC=3S)C=O  
PUGREST.BadRequest: error:  
O=C(C)N[C@@H1]1C2=CCC(SC)=CC=C2C3=C(C(OC)=C(OC)C=C3CC1)OC00  
PUGREST.BadRequest: error:  
O=C(C1)N[C@@H1]2CC(C3=C(C(OC)=C(OC)C=C3CC2)OC(CC)=O)=CC=C(SC)C1=O  
PUGREST.BadRequest: error:  
O=C(C)N[C@@H1]1C2=CCC(SC)=CC=C2C3=C(C(OC)=C(OC)C=C3CC1)OC=O  
PUGREST.BadRequest: error: OC(OC(C)CC)CC(NCC1=CN(N=N1)[C@H1]C2CC3=CC(OC)=C(OC)C  
(OC)=C3C4=CC=CC(=O)C=C24)NC=O  
PUGREST.BadRequest: error:  
O=CC(OOC1=C)C=CC=C1OC(=O)N[C@H1]2CCC3=CC(OC)=C(OC)C(OC)=C3C4=CC=C(NC)C(=O)C=C24  
PUGREST.BadRequest: error:  
OC(OC(C)CC)CC=10CCC=C2[C@H1](CCC3=C(C(OC)=C(OC)C(OC)=C3)C2=CC=1)NSC=O  
PUGREST.BadRequest: error: O=C(C1=C(C(OC)=O)N(N=N1)[C@@H1]C2=C3C(C(NC)=CC=C2C4  
=C(C(OC)=C(OC)C=C4CC3)OC)=O)O  
PUGREST.BadRequest: error:  
C1[C@@H1](C2=CC(C(NC)=CC=C2C3=C(OC)C(OC)=C(C=C3C1)O)C)ONC(C(=O)O)=CNC  
PUGREST.BadRequest: error:  
C1=2[C@H1](CCC3=CC(OC)=C(OC)C(OC)=C3C1=CC=C(C(=O)C=2)NCO)C(C(OC)=O)NC(=O)CNC  
PUGREST.BadRequest: error:  
C1[C@@H1](C2=CC(C(NC)=CC=C2C3=C(OC)C(OC)=C(C=C3C1)O)C)NC(C(=O)=O)=CC(=O)ONC=O  
PUGREST.BadRequest: error:  
C1[C@@H1](C2=CC(C(SC)=CC=C2C3=C(OC)C(OC)=C(C=C3C1)O)C)NC(C(=O)=O)=C(COCC)OOSC=O  
PUGREST.BadRequest: error:  
CN([C@H1]1CC2=CC(OC)=C(OC)C(OC)=C2C=C3C=C)NC(=O)C=C13  
PUGREST.BadRequest: error:  
C=12N(N=NC=1C(OCC3=CC=C(C=C3)F)=O)C(OC)=C(OC)C(OC)=CC4=CC=C(C(=O)C=C24)NC  
PUGREST.BadRequest: error:  
C1=CC1(C=CN(COC(OC)=O)N=NN)[C@H1]C2CC3=CC(OC)=C(OC)C(OC)=C3C=CC=C(NC)C(=O)C=C2  
PUGREST.BadRequest: error:  
O=C(C1=C(C(OC)=O)N(N=N1)[C@@H1]C2=C3CC(NC)=CC=C2C4=C(C(OC)=C(OC)C=C4CC3)OC)OO  
PUGREST.BadRequest: error:  
C=1N(N=NC=1C(=O)OCC2=CC=C(C=C2)F)CC(OC)=C(OC)C(OC)=CC3=CC=C(NC)C(=O)C=C3  
PUGREST.BadRequest: error:  
O=CC1=C(C(OC)=O)N(N=N1)[C@@H1]C2=C3C(C(NC)=CC=C2C4=C(C(OC)=C(OC)C=C4CC3)OC)=O  
PUGREST.BadRequest: error:  
C1[C@@H1](C2=CC3(C(SC)=CC=C2C4=C(OC)C(OC)=C(C=C4C1)O)C)NC(C(=O)=O)=C(C3)ONC  
PUGREST.BadRequest: error: N([C@@H1]1CCC2=CC(OC)=C(OC)C=C2CC1)=CC=C(C=C)NC  
PUGREST.BadRequest: error:  
O=C(C(C1)C1)NC(=O)N[C@H1]1CCC2=C(C(OC)=C(OC)C(OC)=C2)C3=CC=C(NC)C(=O)C=C13  
PUGREST.BadRequest: error:  
O=C(C(C1)C1)NCC1=CN(N=N1)[C@H1]2CCC3=CC(OC)=C(OC)C(OC)=C3C4=CC=C(C(=O)C=C42)NCCO  
PUGREST.BadRequest: error: O=C(C(C1)C1)NC(=O)N[C@H1]1CCC2=C(C(OC)=C(OC)C(OC)=C2  
)C3=CC=C(C(C=C31)=O)NCC(=O)OC

PUGREST.BadRequest: error:  
O=C(C(C1)C1)NC(=O)N[C@H1]1CCC2=C(C(OC)=C(OC)C(OC)=C2)C3=CC=C(NC)C(=O)C=C31  
PUGREST.BadRequest: error:  
O=C(O)C=C(C(OC)=O)N=NN[C@H1]1CCC2=CC(OC)=C(OC)C(OC)=C2C3=CC=C(NC)C(=O)C=C13  
PUGREST.BadRequest: error:  
O=C(O)C1=C(C(OC)=O)N=NN1[C@H1]2CCC3=CC(OC)=C(OC)C(OC)=C3C4=CC=C(NC)C(=O)C=C24  
PUGREST.BadRequest: error:  
O=C(C)N[C@@H1]C1=C2C(C(SC)=CC=C1C3=C(C(OC)=C(OC)C=C3CC2)OC(C(C)C)=O)C=O  
PUGREST.BadRequest: error:  
O=C(OC)C1=CN(N=N1)[C@H1]2CCC3=CC(OC)=C(OC)C(=C3C4=CC=C(NC)C(C=C42)=O)OCC  
PUGREST.BadRequest: error:  
O=C(C)N[C@@H1]C1=C2C(C(SC)=CC=C1C3=C(C(OC)=C(OC)C=C3CC2)OC(C4=CC=CC=C4)=O)SC=O  
PUGREST.BadRequest: error:  
O=C(C(C)C)OC=1C(C=C2[C@H1](CCC3=CC(OC)=C(OC)C(OC)=C3C2=CC=1N)C(C)=O)SC=O  
PUGREST.BadRequest: error:  
O=C(O)C1=CN(N=N1)[C@H1]2CCC3=C(C(OC)=C(OC)C(OC)=C3)C4=CC=C(C(=O)C=C42)NCC  
PUGREST.BadRequest: error:  
O=C(O)C1=C(C(OC)=O)N=NN1[C@H1]CCC2=CC(OC)=C(OC)C(OC)=C2C3=CC=C(C(C=C3)=O)NC  
PUGREST.BadRequest: error:  
O=C(C(C)C)OCC(C=C1[C@H1](CCC2=CC(OC)=C(OC)C(O)=C2C1=CC=O)C(C)=O)C=O  
PUGREST.BadRequest: error:  
O=C(C(C)C)OC=1C(C=C2[C@H1](CCC3=CC(OC)=C(OC)C(OC)=C3C2=CC=1S)C(C)=O)OC  
PUGREST.BadRequest: error:  
O=C(O)C=C(OC)C(C(NC)=CC=C1C2=C(OC)C(OC)=C(OC)C=C2CC[C@@H1](C1)NCC)=O  
PUGREST.BadRequest: error:  
O=C(O)C1=CN(N=N1)[C@H1]2CCC3=C(C(OC)=C(OC)C(OC)=C3)C4=CC=C(C(C=C42)=O)NCC  
PUGREST.BadRequest: error: CCCCCCCCCCCCCCCC(OC1=CN(N=N1)[C@H1]C2CC3=CC(OC)=C(O  
C)C(OC)=C3C4=CC=C(C(=O)C=C24)NC)=O  
PUGREST.BadRequest: error:  
CCCCCCCCCCCCCCCC=10CCC=C2[C@H1](CCC3=C(C(OC)=C(OC)C(OC)=C3)C2=CC=1)NSC=O  
PUGREST.BadRequest: error:  
OC(=O)C1=C(C(OC)=O)N=NN1[C@H1]CCC2=CC(OC)=C(OC)C(OC)=C2C3=CC=C(NC)C(C=C3)=O  
PUGREST.BadRequest: error:  
C[C@H1](NCC)CC1=CCC(NC)=CC=C1C2=C(C=C(OC)C(OC)=C2OCC3=CC=CC=C3)OSC  
PUGREST.BadRequest: error: C1[C@H1](OC1)O[C@@H1]([C@H1]O)COCCNC2(N=NC(=C2)C=CC3  
=C(C=CC4=C3)C1)CC(OC)=C(OC)C=C4CCNC=O  
PUGREST.BadRequest: error:  
OC(=O)C1=C(C(OC)=O)N(N=N1)[C@H1]C2CC3=CC(OC)=C(OC)C(OC)=C3C4=CC=C(NC)C(=O)C=C42  
PUGREST.BadRequest: error:  
C1[C@H1](OCCC)CC2=CC(C(NC)=CC=C2C3=C(C(OC)=C(OC)C=C3CC1)OC(OC)=O)NC=O  
PUGREST.BadRequest: error:  
C1=C(OC)C=C(OC)C=C1CC[C@H1](C=CC(C(OC(C2=CC=CC=C2)=O)=CC=CC)=O)C  
PUGREST.BadRequest: error: N(C)C(=O)NCCC(OC1=CN(N=N1)[C@H1]CCC2=CC(OC)=C(OC)C(OC)=C2C3=CC=C(C(=O)C=C3)N)C=O  
PUGREST.BadRequest: error:  
C1[C@H1](OC1)OCOC(=S)N[C@H1]C2CC=C3C(OC)=C(OC)C(OC)C=C3C=4C2=CC(=O)C(=CC=4)NCC=C  
PUGREST.BadRequest: error:  
C1[C@H1](NCC)C2C=CC(OC)=C(OC)C=C2CC[C@H1]C3=CCC(OC(OC)=O)=CC=C31

PUGREST.BadRequest: error:  
C12=C(OC)C=C(OC)C=C1CC[C@H1](NC(C(O)=O)(C)C2=CC=C(NC)C)CON=COC

PUGREST.BadRequest: error:  
N(C)CNCC1=CN(N=N1)[C@H1]2CCC3=CC(OC)=C(OC)C(OC)=C3C4=CC=C(C(C=C24)=O)NC=O

PUGREST.BadRequest: error:  
OC(=O)C=C(C(OC)=O)N(NCCC)N[C@H1]1CCC2=CC(OC)=C(OC)C(OC)=C2C3=CC=C(NC)C(=O)C=C31

PUGREST.BadRequest: error:  
C[C@H1](NCC)CC1=CC(C(NC)=CC=C1C2=C(C=C(OC)C(OC)=C2OCC3=CC=CC=C3)OSCC)=O

PUGREST.BadRequest: error: C1[C@H1](OC1)OOC(O)(C)CN=CN([C@H1]2C3=CC(C(SC)=CC=C3C4=C(OC)C(OC)=C(C=C4CC2)O)O)C=O

PUGREST.BadRequest: error:  
C12=C(OC)C=C(OC)C=C1CC[C@H1](NC(C(O)=O)(C)C2=CC=C(NC)C)COCNCOC

PUGREST.BadRequest: error: C=1C(C)(C)OC(=O)/N=C(/N[C@H1]2CCC3=C(C(OC)=C(OC)C(OC)=C3)C4=CC=C(NC)C(=O)C=C24)N=1

PUGREST.BadRequest: error: C=1C(C)(C)OC(=O)/N=C(/N[C@H1]2CCC3=C(C(OC)=C(OC)C(OC)=C3)C4=CC=C(C(C=C42)=O)NC)N=1

PUGREST.BadRequest: error:  
N1=NN1[C@@H1]2C3=CC(C(NC)=CC=C3C4=C(C(OC)=C(OC)C=C4CC2)OC)=O

PUGREST.BadRequest: error:  
CNCC1C=CC=C(C=C1)NC(=O)N[C@@H1]2C3=CC(C(NC)=CC=C3C4=C(OC)C(OC)=C(C=C4CC2)OC)=O

PUGREST.BadRequest: error:  
CNC=CC=C1C[C@H1](CCC2=CC(OC)=C(OC)C(=C21)OC)N3C(C(O)=O)=C(N=N3)C(=O)OOSC

PUGREST.BadRequest: error:  
CNC=1CC=C2[C@H1](CCC3=C(C(OC)=C(OC)C(=C3)OC)C2=CC=1)NC(C(=O)O)=CC=CNC=O

PUGREST.BadRequest: error:  
CNC=1CC2=C3[C@H1](CCC4=C(C(OC)=C(OC)C(=C4)OC)C3=C5C=1)NC(C(=O)O)=C5ON2

PUGREST.BadRequest: error:  
N=NN([C@H1]1CCC2=C(C(OC)=C(OC)C(OC)=C2)C3=CC=C(C(=O)C=C13)NC)C00CCOC=O

PUGREST.BadRequest: error:  
CNCC1C=C2[C@H1](CCC3=C(C(OC)=C(OC)C(=C3)OC)C2=CC=C1)NCOC(C4=CC=NC=C4)=O

PUGREST.BadRequest: error:  
O=CC=CC=CC(NCC1=CN(N=N1)[C@H1]2CCC3=CC(OC)=C(OC)C(OC)=C3C4=CC=C(C(C=C24)=O)NC)=O

PUGREST.BadRequest: error:  
O=CC=CC=CC(NCC1=CN(N=N1)[C@H1]2CCC3=CC(OC)=C(OC)C(OC)=C3C4=CC=C(NC)C(=O)C=C24)O

PUGREST.BadRequest: error:  
CNC=1CC=C2[C@H1](CCC3=C(C(OC)=C(OC)C(OC)=C3)C2=CC=1)NC(C(=O)O)=CC=CNC=O

PUGREST.BadRequest: error:  
N=NN([C@H1]1CCC2=C(C(OC)=C(OC)C(OC)=C2)C3=CC=C(C(=O)C=C13)NC)C0CC=C0C0CC

PUGREST.BadRequest: error:  
C12=C3C(C=4C([C@@H1](NCC5=CC=C(C)C=C5CCC1)C2)=CC(=O)C(=CC=4)SC=C)(OC)C(=C3OC)OC

PUGREST.BadRequest: error:  
C1=C2C(C3=C(CC[C@@H1]2N4N=NC(=C4)C5(O)CCCC5)C=C(C(OC)=C3OC)OC=C)C=C(C1=O)O

PUGREST.BadRequest: error:  
C1=C2C(C=C(CC[C@@H1]2N3C=C(N=N3)C0CC4=CC=CC=C4)C=C(C(=COC)OC)OC)=CC=C(NC)C1=O

PUGREST.BadRequest: error: C1=C2C(C3=CC=C(C(=O)C=C3[C@H1](CC2)N4C=C(N=N4)COC(=O)C5=CC=NC=C5)COC)C(OC)=C1OCNC=O

PUGREST.BadRequest: error:  
C12=C3C(CC([C@@H1](NCC4=CC=C(C)C=C4CCC1)C2)=CC(=O)C(=CC)SC=C)(OC)C(=C3OC)OC

PUGREST.BadRequest: error:  
C1=C2C(CC([C@@H1]1NCCCCCCCCCCCCCCC)C(=CC2)SC=COC)C(OC)=COC  
PUGREST.BadRequest: error:  
CN(N([C@@H1]1C2=CC(=O)C(NC)=CC=C2C3=CC(=C(OC)C=C3CC1)OC)O)CNC(=S)CCCC  
PUGREST.BadRequest: error:  
C=C1C(C=C(CC[C@@H1]1N2N=NC(=C2)C3=CC=C(C1)C=C3)C=C(C(OC)=COC)OC)=CC=C(C=O)NC  
PUGREST.BadRequest: error:  
CC(C)C(=O)OCC1=CN(N=N1)[C@H1]2CCC3=CC(OC)=C(OC)C(OC)=C3C4=CC=C(NC)C(=O)C=C24  
PUGREST.BadRequest: error:  
CC(C)C=1OCCC=C2[C@H1](CCC3=C(C(OC)=C(OC)C(OC)=C3)C2=CC=1)NSC=O  
PUGREST.BadRequest: error:  
CC(C)(O)C1N=NN(CN1CC[C@H1]2CC)C3=CC(OC)=C(OC)C(OC)=C3C4=CC=C(C(C=C24)=O)NC  
PUGREST.BadRequest: error:  
N(C(C1=CC=NC=C12)=O)[C@@H1]3CC(C4=C(C(OC)=C(OC)C=C4CC3)OC(OC)=O)=CC=C(SC)C2=O  
PUGREST.BadRequest: error:  
N(C(C1=CC=NC=C1)=O)[C@@H1]2C=3C(C4=C(C(OC)=C(OC)C=C4CC2)OC)=CC=C(SC)C(=O)C=3  
PUGREST.BadRequest: error:  
C12=C(C(=C(OC)C(OC)=C1)O)CC3=CC=C(NC)CC=C3[C@H1](CC2)NC(C)=O  
PUGREST.BadRequest: error:  
N1(CCCC1)CN[C@H1]2CCC3=C(C(OC)=C(OC)C(OC)=C3)C4=CC=C(SC)C(=O)C=C24  
PUGREST.BadRequest: error:  
C1[C@H1](NC(O)=O)C2=CCC=CC=C2C3=C(OC)C(OC)=C(OC)C=C3CC=C1SC=O  
PUGREST.BadRequest: error:  
N1(CCCC1)C(=O)OC2=C(OC)C(OC3)=CC=C2C4=CC=C(SC)C(C=C4[C@H1](NC(=O)C)CC3)=O  
PUGREST.BadRequest: error:  
C=CC(=O)OCCC=C1[C@H1](CCC2=C(C(OC)=C(OC)C(OC)=C2)C1=CC)N=O  
PUGREST.BadRequest: error:  
N(C(C1=CC=NC=C1)=O)[C@@H1]2C=3C(C4=C(C(OC)=C(OC)C=C4CC2)OC=C)C=C(SC)C(=O)C=3  
PUGREST.BadRequest: error:  
C12=CC(OC)=C(OC)CCC([C@H1](CCCC=C1OC)NC(C)=O)(OC(=O)OC)C2=O  
PUGREST.BadRequest: error:  
C1[C@H1](NC(O)=O)C=CCC(SC)=CCC=C(C2=C(OC)C(OC)=C(OC)C=C2CC1)SC=O  
PUGREST.BadRequest: error: C12=C(C(OC)=C(OC)CCC([C@H1]2CCC(C)C1N=C)=O)OSC  
PUGREST.BadRequest: error:  
C=CC(OC)=C(OC)CC1=CC=C(NC)CC=C1[C@H1](NC(N(CCO)CCO)=S)CCCNC=O  
PUGREST.BadRequest: error:  
CNC=1C(=O)C=C2[C@H1](CCC3=CC(OC)=C(OC)C(OC)=C3C2=CC=1)NC4(C(=O)O)C=CN=N4  
PUGREST.BadRequest: error:  
CNC=1C(=O)C=C2[C@H1](CCC3=CC(OC)=C(OC)C(OC)=C3C2=CC=1N)C4(C(=O)O)C=CN=N4  
PUGREST.BadRequest: error:  
N1=CC=CC2=C1C(OC=CC(OC=3)=CCCC[C@H1](NC(C)=O)C4=CCC(SC)=CC=C4C=32)C  
PUGREST.BadRequest: error:  
N=1N(C=C(CNC(C(C)C)=O)N=1)[C@H1]CCC2=C3C(OC)=C(OC)C(OC)=C2C=CC=C(CC=CC=C3)CC  
PUGREST.BadRequest: error:  
NN(C=C(CNC(C1CCCC1)=O)N=N)[C@H1]CCC2=CC(OC)=C(OC)C(OC)=C2C3=CC=C(C(=O)C=C13)NC  
PUGREST.BadRequest: error:  
C=C1[C@H1](CCC2=C(C(OC)=C(OC)C(OC)=C2)C1=CC=CC(C)=O)NCNC(C)=O  
PUGREST.BadRequest: error:



N=1N(C=C(CNC(C(C)C)=O)N=1)[C@H1]CCC2=CC(OC)=C(OC)C(OC)=C2C=CC3=CCC=CC=C3NC=O  
 PUGREST.BadRequest: error:  
 C=C1[C@H1](CCC2=CC(OC)=C(OC)C(OC)=C2C1=CC=C(C(=O)C)NC)NC(C(=O)O)=CN=CNC  
 PUGREST.BadRequest: error: CC(C)(C)OC(=O)NCCC(NCC=1N=NN(C=1)[C@H1]C2CC3=CC(OC)=  
 C(OC)C(OC)=C3C4=CC=C(C(=O)C=C24)N)C=O  
 PUGREST.BadRequest: error:  
 C1C(C)(C)OC/N=C(/N[C@H1]2CCC3=CC(OC)=C(OC)C(=C3C4=CC=C(NC)C(C=C42)=O)OC)N=N1  
 PUGREST.BadRequest: error: CC(C)(C)OCNCCC(=O)NCC1=CN(N=N1)[C@H1]2CCC3=CC(OC)=C(  
 OC)C(OC)=C3C4=CC=C(C(C=C24)=O)NC=O  
 PUGREST.BadRequest: error:  
 C1C(C)(C)OC/N=C(/N[C@H1]2CCC3=CC(OC)=C(OC)C(=C3C4=CC=C(NC)C(C=C42)=O)OC)N1C  
 PUGREST.BadRequest: error: CC(C)(C)OC(=O)NCCC(OC=1N=NN(C=1)[C@H1]C2CC3=CC(OC)=  
 C(OC)C(OC)=C3C4=CC=C(C(=O)C=C24)NC)=O  
 PUGREST.BadRequest: error: CC(C)(C)OC(=O)NCCC(NCC=1N=NN(C=1)[C@H1]2CCC3=CC(OC)=  
 C(OC)C(OC)=C3C4=CC=C(C(C=C24)=O)N)C=O  
 PUGREST.BadRequest: error:  
 CNCCC1=CC=C(C=C1)NC(=O)N[C@H1]2CCC3=CC(OC)=C(OC)C(OC)=C3C4=CC=C(C(C=C24)=O)NC=O  
 PUGREST.BadRequest: error:  
 N=NN([C@@H1]1C=2C(C3=C(C(OC)=C(OC)C=C3CC1)OC)=CC=C(NC)CC=2)OC(O)=O  
 PUGREST.BadRequest: error:  
 N1=NN[C@@H1]2CCC3=C(C(OC)=C(OC)C=C3CC2=CC(OC)=C(OC)COC)CN1  
 PUGREST.BadRequest: error:  
 O=CC=CC=CC(NCC1=CN(N=N1)[C@H1]C2CC3=CC(OC)=C(OC)C(OC)=C3C4=CC=C(C(=O)C=C24)NC)=O  
 PUGREST.BadRequest: error: CNCC(C1=CC=C(C=C1)NC(=O)N[C@@H1]2C3=CC(C(NC)=CC=C3C4  
 =C(C(OC)=C(OC)C=C4CC2)OC)=O)OC  
 PUGREST.BadRequest: error:  
 CNCC1C=C2[C@H1](CCC3=C(C(OC)=C(OC)C(=C3)OC)C2=CC=C1)NCOC(C4=CC=CC=C4)=O  
 PUGREST.BadRequest: error:  
 N=NN([C@H1]1CCC2=C(C(OC)=C(OC)C(=C2)OC)C3=CC=C(NC)C(C=C13)=O)COC4CC=CC=C4O  
 PUGREST.BadRequest: error:  
 C1=C2C(C3=CC=C(CC=C3[C@@H1](N4C=C(N=N4)CNC(=O)C(C1)C1)C1)ONC=C)(C(=C2OC)OC)OC  
 PUGREST.BadRequest: error:  
 C12=C3C(CC([C@@H1](NCC4=CC=C(C)C=C4CCC1)C2)NN=NC=C(NC)C=O)=C=C(C(=C3)OC)OCOC  
 PUGREST.BadRequest: error:  
 C=C1C(C=C(CC[C@@H1]1N2N=NC(=C2)CNC(=O)OCCC)CC=C(C(OC)=COC)O)C=CC=C(C=O)NC  
 PUGREST.BadRequest: error:  
 C=C1C(C=C(CC[C@@H1]1N2C=C(N=N2)CNC(=O)C3=CC=NC=C3)C=CC(OC)=COC)OC=CC=C(C=O)NC  
 PUGREST.BadRequest: error:  
 O(C=CC=CC1=C(OC)C(OC)=C(OC)C=C1CC[C@H1](C=CCCOC2=CC=CC=C2)OCC)ONC  
 PUGREST.BadRequest: error:  
 O(C=CC=CC1=C(OC)C(OC)=C(OC)C=C1CC[C@H1](C=CCCOC2=CC=CC=C2)OSC=O)NC  
 PUGREST.BadRequest: error:  
 O=C(OC)OCC1=CN(N=N1)[C@H1]2CCC3=CC(OC)=C(OC)C(OC)=C3C4=CC=C(NC)C(=O)C=C24  
 PUGREST.BadRequest: error:  
 O(C=CC=CC1=C(OC)C(OC)=C(OC)C=C1C2C[C@H1](C=CCC(OC(C)C)=O)N=C2ON)C  
 PUGREST.BadRequest: error:  
 O=C(C(C)C)NC(=S)N[C@@H1]1C=2C(C3=C(C(OC)=C(OC)C=C3CC1)OC)=CC=C(NC)C(=O)C=2  
 PUGREST.BadRequest: error:

O=C(OCC)OCC=1N=NN(C=1)[C@H1]2CCC3=CC(OC)=C(OC)C(OC)=C3C4=CC=C(NC)C(=O)C=C24  
 PUGREST.BadRequest: error:  
O=C(OCC)CN(CCO)C(=S)N[C@H1]1CCC2=CC(OC)=C(OC)C(OC)=C2C3=CC=C(NC)C(=O)C=C13  
 PUGREST.BadRequest: error:  
CC(C)CNCC1=CN(N=N1)[C@H1]2CCC3=CC(OC)=C(OC)C(OC)=C3C4=CC=C(C(C=C24)=O)NC=O  
 PUGREST.BadRequest: error:  
CC(C)CNCC1=CN(N=N1)[C@H1]2CCC3=CC(OC)=C(OC)C(OC)=C3C4=CC=C(NC)C(=O)C=C24  
 PUGREST.BadRequest: error:  
C(=CN(C(=O)OCC)N[C@@H1]1CC=2)(C3=C(C(OC)=C(OC)C=C3CC1)OC)CC=C(NC)C(C=2)=O  
 PUGREST.BadRequest: error:  
COCNCC1=CN(N=N1)[C@H1]2CCC3=CC(OC)=C(OC)C(OC)=C3C4=CC=C(C(C=C42)=O)NC=O  
 PUGREST.BadRequest: error:  
C(=NC=C(NC)CC(=O)N)CC1=CN(N=N1)[C@H1]CCC2=CC(OC)=C(OC)C(OC)=C2C=CC=C(C)CNC=O  
 PUGREST.BadRequest: error:  
C(=C1N(C(=O)OCC)N12)CCC3=C(C(OC)=C(OC)C(OC)=C3)C4=CC=C(NC)C(C=C24)=O  
 PUGREST.BadRequest: error:  
N(C(C)C)C(NCC1=CN(N=N1)[C@H1]2CCC3=CC(OC)=C(OC)C(OC)=C3C4=CC=C(NC)C(=O)C=C24)=O  
 PUGREST.BadRequest: error:  
N(C)C1=CC=C2C3=C(OC)C(OC)=C(OC)C=C3CC[C@@H1](C2=CC1=O)NC(C(=O)O)CCON=CCF  
 PUGREST.BadRequest: error:  
N(C(C(C)C)=O)C1=CN(N=N1)[C@H1]2CCC3=C(C(OC)=C(OC)C(OC)=C3)C4=CC=C(NC)C(=O)C=C24  
 PUGREST.BadRequest: error:  
N(CCCCCC=O)CC1=CN(N=N1)[C@H1]2CCC3=CC(OC)=C(OC)C(OC)=C3C4=CC=C(NC)C(=O)C=C24  
 PUGREST.BadRequest: error: C1=C(C=CC(C1)=C1)COC(=O)CN[C@@H1]2C=3C(C4=C(C(OC)=C(OC)C=C4CC2)OC)=CC=C(SC)C(=O)C=3  
 PUGREST.BadRequest: error:  
N(C)C1=CC=C2C3=C(OC)C(OC)=C(OC)C=C3CC[C@@H1](C2=CC1=O)NC(C(=O)O)CCONC(=O)C=C  
 PUGREST.BadRequest: error:  
N(C)C1=CC=C2C3=C(OC)C(OC)=C(OC)C=C3CC[C@@H1](C2=CC1=O)NC(C(=O)O)CCONC(=O)CNC  
 PUGREST.BadRequest: error:  
N(C(C)C)CC(=O)OCC1=C2N(N=N1)[C@H1]CCC3=CC(OC)=C(OC)C(OC)=C3C4=CC=C(NC)C(C=C24)=O  
 PUGREST.BadRequest: error:  
C[C@H1](C1OC=CN[C@@H1]2C=C(C3=CC(OC)=C(OC)C(OC)=C3C1)CC=C(NC)CC2)ONCC  
 PUGREST.BadRequest: error: C1=C2CC[C@H1](C3=CC(C(SC)=CC=C3C2C=C1O)CNC=O)CN=O  
 PUGREST.BadRequest: error:  
COC=C1C2=CC=C(NC)C(=O)C=C2[C@@H1](NCC(C)C)CCC1=CC(OC)=COC  
 PUGREST.BadRequest: error:  
C1=C2CC[C@H1](C3=CCC(SC)=CC=C3C2=C(C(OC)=C1OC)OC=O)[N-1]  
 PUGREST.BadRequest: error:  
C=C1C=2C[C@H1](CC(C3=CC(OC)=C(OC)C=C31)C=CC=CSC)C(=O)C=2N  
 PUGREST.BadRequest: error:  
COC=C1C2=CC=C(NC)C(=O)C=C2[C@@H1](NCCC)CCC1=CC(OC)=COC  
 PUGREST.BadRequest: error:  
C1OC=C2C3=CC=C(NC)C(=O)C=C3[C@H1](CCC2C=COC)NCCCCOC=C1  
 PUGREST.BadRequest: error:  
C1=C2CC[C@H1](C3=CCC(NC)=CC=C3C2=C(C(OC)=C1OC)OC)ONCCC#N  
 PUGREST.BadRequest: error:  
CC(CC)N[C@@H1]1C2=CC(C(SC)=CC=C2C3=C(OC)C(OC)=C(C=C3CC1)OC)=O

PUGREST.BadRequest: error:  
CC(CC)N[C@@H1]C1=C2C(C(NC)=CC=C1C3=C(OC)C(OC)=C(OC)C=C3CC2)=0  
PUGREST.BadRequest: error:  
CC(CC)N[C@@H1]1C2=CC(C(SC)=CC=C2C3=C(CC1)C=C(OC)C(OC)=C3OC)=0  
PUGREST.BadRequest: error:  
C1=C2CC[C@H1](C3=CCC(SC)=CC=C3C2=C(C(OC)=C1OC)OC=O)N=[N+1]=[N-1]  
PUGREST.BadRequest: error:  
COC1=C2C3=CC=C(NC)C(=O)C=C3[C@H1](CCC2=CC(OC)=C1OC)NCC4=CC=NS4C  
PUGREST.BadRequest: error:  
N(CCCC)C(CN1[C@@H1]C2=CCC(O)=CC=C2C3=C(CC1)C=C(OC)C(OC)=C3OC)=0  
PUGREST.BadRequest: error:  
C1[C@H1](NCC)CC2=CC(C(NC)=CC=C2C3=C(OC)C(OC)=C(OC)C=C3C1N)C=O  
PUGREST.BadRequest: error:  
N(C)C=1C(=O)C=C2[C@H1](CCC3=CC(OC)=C(OC)C(OC)=C3C2=CC=1N)C(C)CCSC  
PUGREST.BadRequest: error:  
C1=C(OC)C(OC)=C(OC=2)CC3=CC=C(SC)C1(C=C3[C@@H1](NC(N(C)C)=O)CCC=2)O  
PUGREST.BadRequest: error:  
N(C(C)=O)[C@@H1]C1=CC(C(NC)=CC=C1C2=C(OC)C(OC)=C(OC)C=C2CCNC=O)C  
PUGREST.BadRequest: error:  
C[C@H1](OCCC)[N-1]C1=CC(C(NC)=CC=C1C2=C(C(OC)=C(OC)C=C2C)OC)NC(=O)C  
PUGREST.BadRequest: error:  
C1=C(OC)C(OC)=C(OC)CC2=CC=C(SC)C1(C=C2[C@@H1](NC(N(C)C)=O)CCC)O  
PUGREST.BadRequest: error:  
N1=NN([C@@H1]C2=CC(C(O)=CC=C2C3=C(CC)C=C(OC)C(OC)=C3OC)=O)CC=C1F  
PUGREST.BadRequest: error:  
CNC=1C(C=C2[C@H1](CCC3=C(C(OC)=C(OC)C(OC)=C3)C2=CC=1)NC(C)C=O)SC  
PUGREST.BadRequest: error:  
CNC=1C(C=C2[C@H1](CCC3=C(C(OC)=C(OC)C(OC)=C3)C2=CC=1)NC(C)C)=O  
PUGREST.BadRequest: error:  
CNC=1C(C=C2[C@H1](CCC3=C(C(OC)=C(OC)C(OC)=C3)C2=CC=1)NC(C)C)CSCSC=O  
PUGREST.BadRequest: error:  
CNC=1C(C=C2[C@H1](CCC3=C(C(OC)=C(OC)C(OC)=C3)C2=CC=1)NC(C)C=O)SCSC  
PUGREST.BadRequest: error:  
C=1NC=2C(C=C3[C@H1](CCC4=C(C(OC)=C(OC)C(OC)=C4)C3=CC=2)NC(C)C)N=CN=1  
PUGREST.BadRequest: error:  
NN([C@H1]1CCC2=CC(OC)=C(OC)C(OC)=C2C3=CC=C(NC)C(=O)C=C13)C=O  
PUGREST.BadRequest: error:  
CNC=1C(C=C2[C@H1](CCC3=C(C(OC)=C(OC)C(OC)=C3)C2=CC=1)NC(C)C)C=O  
PUGREST.BadRequest: error:  
N1=NC(=CN(NC1)C=CC2(CC[C@H1](N)C3=CC(C(NC)=CC=C32)=O)CCOC)COC=C  
PUGREST.BadRequest: error:  
N1=NC(=C2N(NC1)C=CC3=CC4=C(OC)C(OC)=CC=C4CC[C@H1](NC(N)=O)C3=C2)OC=O  
PUGREST.BadRequest: error:  
N1=NC(=CN(N=N1)[C@H1]2CCC3=CC(OC)=C(OC)C(OC)=C3C4=CC=C(C(C=C42)=O)N)C  
PUGREST.BadRequest: error:  
OCCN(CC=C)C(=O)N[C@@H1]1C2=CC(C(NC)=CC=C2C3=C(OC)C(OC)=C(OC)C=C3CC1)=O  
PUGREST.BadRequest: error:  
N1=NC=CN(NC1)C=CC=C2C3=C(OC)C(OC)=C(OC)C=C3CC[C@@H1](C2=C)NC=CC=C

PUGREST.BadRequest: error:  
N1=NC=CN(N=N1)[C@H1]2CCC3=CC(OC)=C(OC)C(OC)=C3C4=CC=C(NC)C(=O)C=C24  
PUGREST.BadRequest: error:  
N1=NC=CN(NC1)[C@H1]2CCC3=CC(OC)=C(OC)C(OC)=C3C4=CC=C(NC)C(=O)C=C24  
PUGREST.BadRequest: error:  
N1=NC(=CN(NC12)C=CC3=C(O)C(OC)=C(OC)C=C3CC[C@H1](N)C4=CCC(NC)=CC=C24)OC  
PUGREST.BadRequest: error:  
N1=NC(=CN(NC1)C=CC2=C(O)C(OC)=C(OC)C=C2CC3[C@H1](N)C=CCC(NC)=CC=C3)OC  
PUGREST.BadRequest: error:  
OCCN(CC=C)C(=S)N[C@H1]1CCC2=CC(OC)=C(OC)C(OC)=C2C3=CC=C(NC)C(=O)C=C13  
PUGREST.BadRequest: error:  
CNC(N(C)C)CN[C@H1]1CCC2=CC(OC)=C(C(OC)=C2C=3C1=CC(=O)C(=CC=3)NC)OC  
PUGREST.BadRequest: error:  
C1=C2C([C@H1](CCC3=CC(OC)=C(C(=C32)OC)OC)NCCC=CC)(C(SC)=C1)O  
PUGREST.BadRequest: error:  
C=C1C([C@H1](CCC2=CC(OC)=C(C(OC)=C12)OC)NCC=CC=O)C(=CC)NC  
PUGREST.BadRequest: error:  
C12=CC(C(SC)=CC=C1C3=C(CC[C@H1]2NCC4=CC=NC=C4)C=C(OC)C(OC)=C3O)C=O  
PUGREST.BadRequest: error:  
C12=CC(C(NC)=CC=C1C3=C(OC)C(=C(C=C3CC[C@H1]2N4CC=CC=C4)O)CO)C=O  
PUGREST.BadRequest: error:  
C12=CC(C(NC)=CC=C1C3=C(OC)C3=C(CCC[C@H1]2NCC=CC)CS)OC=O  
PUGREST.BadRequest: error:  
COC1=C(OC)C(OC)=CCCC[C@H1](NCC2=CC=CS2)C3=CC(=O)C(NC)=CC=C3C1  
PUGREST.BadRequest: error:  
C12=CC(C(SC)=CC=C1C3=C(OC)C(=C(C=C3CC[C@H1]2N4CC=CC=C4)O)CO)C=O  
PUGREST.BadRequest: error:  
COC=C(OC)C(OC)=C1CCC[C@H1](NCC(C)C)C2=CC(=O)C(SC)=CC=C2C1  
PUGREST.BadRequest: error:  
NC(N(CC)OC)N[C@H1]1CCC2=CC(OC)=C(OC)C(OC)=C2C=3C1=CC(=O)C(=CC=3)NC  
PUGREST.BadRequest: error:  
N1C(C(CCC)=C)N1[C@H1]2CCC3=CC(OC)=C(OC)C(OC)=C3C4=CC=C(C(=O)C=C24)NC  
PUGREST.BadRequest: error:  
C12=CC=C(NC)C2C=C1[C@H1](NC(C)=O)CCC=CC(OC)=C(OC)C(OC)=C  
PUGREST.BadRequest: error:  
C1[C@H1](C2=CC(C(SC)=CC=C2C3=C(OC)C(=C(OC)C=C3C1)OC)=O)NCC  
PUGREST.BadRequest: error:  
NC(CCN=N[C@H1]1CCC2=CC(OC)=C(OC)C(OC)=C2C3=CC=CC(=O)C=C13)NCC  
PUGREST.BadRequest: error:  
C1=2[C@H1](CCC3=CC(OC)=C(OC)C(OC)=C3C1=CC=C(NC)C(=O)C=2NC)C=O  
PUGREST.BadRequest: error:  
C=C1C2=C(OC)C(OC)=C(OC)C=C2CC[C@H1](NC(C=3)=O)C1=CC=C(C(C=3)=O)SC  
PUGREST.BadRequest: error:  
C=C1C2=C(OC)C(OC)=C(OC)C=C2CC[C@H1](NC(N)=O)C1=CC=C(NC)C(=O)C  
PUGREST.BadRequest: error: C1[C@H1](CC(C2=CC(OC)=C(OC)C=C21)C=CC=C(NC)CC)ON  
PUGREST.BadRequest: error:  
C12=CC3=C(OC)C(OC)=C(OC)C=C3CC[C@H1](NC(N)=O)C=C1C=C(OC)C(=C2)OO  
PUGREST.BadRequest: error:

C=C1C2=C(OC)C(OC)=C(OC)C=C2CC[C@H1](NC(C)=O)C1=CC=C(C(C)=O)SC  
 PUGREST.BadRequest: error:  
 C1[C@@H1](C2=CC(C(NC)=CC=C2C3=C(OC)C(OC)=C(OC)C=C3C1=O)N)C(=O)C  
 PUGREST.BadRequest: error:  
 C1=2[C@H1](CCC3=CC(OC)=C(OC)C(OC)=C3C1=CC=C(C(C=2)=O)SCNC)C=O  
 PUGREST.BadRequest: error:  
 C1=2[C@H1](CCC3=CC(OC)=C(OC)C(OC)=C3C1=CC=C(SC)C(=O)C=2NC)C  
 PUGREST.BadRequest: error:  
 C1=2[C@H1](CCC3=CC(OC)=C(OC)C(OC)=C3C1=CC=C(C(C=2)=O)SCN)C(=O)C  
 PUGREST.BadRequest: error:  
 NC(=O)N[C@@H1]C1=C2C(C(NC)=CC=C1C3=C(OC)C(OC)=C(OC)C=C3CC2)=O  
 PUGREST.BadRequest: error:  
 CC(C)NC(=O)N1[C@@H1]C2=CC(C(NC)=CC=C2C3=C(OC)C(OC)=C(OC)C=C3CC1)=O  
 PUGREST.BadRequest: error:  
 CC(N)(CCO)[C@H1]1CCC2=CC(OC)=C(OC)C(OC)=C2C3=CC=C(SC)C(=O)C=C13  
 PUGREST.BadRequest: error:  
 CC(N)(CCO)[C@H1]1CCC2=CC(OC)=C(OC)C(OC)=C2C3=CC=C(C(C=C31)=O)NCC  
 PUGREST.BadRequest: error:  
 C1#CC(C=C2[C@H1](CCC3=CC(OC)=C(OC)C(OC)=C3C2=C1N)C(C)=O)=C  
 PUGREST.BadRequest: error:  
 C1[C@H1](NC(C)=O)C2=CC(C(NC)=CC=C2C3=C(OC)C(OC)=C(C=C3C1)OCNC)=O  
 PUGREST.BadRequest: error:  
 C12=C(C2C=C3[C@H1](CCC4=CC(OC)=C(OC)C(OC)=C4C3=C1N)C(C)=O)OSC  
 PUGREST.BadRequest: error:  
 C1[C@H1](NC(C)=O)C2=CC(C(SC)=CC=C2C3=C(OC)C(OC)=C(C=C3C1)OCNC)=O  
 PUGREST.BadRequest: error:  
 C12=C(C(C=C3[C@H1](CCC4=CC(OC)=C(OC)C(OC)=C4C3=C1N)CC)=O)C2=O  
 PUGREST.BadRequest: error:  
 N1(CC2=CC=CN=C23)C=CC(C4=CN(OC)C=C3CC[C@H1](C4)C=C)CC(OC)=COC=C1  
 PUGREST.BadRequest: error:  
 C1[C@H1](NC(C)=O)C2=CCC(NC)=CC=C2C3=C(OC)C(OC)=C(OC)C=C3C1=O  
 PUGREST.BadRequest: error:  
 C=C(N[C@H1]1CCC2=C(C(OC)=C(OC)C(OC)=C2)C3=CC=C(SC)C(C=C31)=O)C  
 PUGREST.BadRequest: error:  
 C=12C=C(NC=3)CC4=CC=1CC=C2[C@H1](CCC=3C=C(OC)C(OC)=C4O)CNC(=O)CSCSC=O  
 PUGREST.BadRequest: error:  
 C1[C@H1](NC(C)=O)C2=CCC(SC)=CC=C2C3=C(OC)C(OC)=C(OC)C=C3C1NC=O  
 PUGREST.BadRequest: error:  
 C=1C=C(NC)CC=C2C=1C3=C(OC)C(OC)=C(OC)C=C3CC[C@@H1]2NC(C)=O  
 PUGREST.BadRequest: error:  
 C=12C=C(NC=3)CC4=CC=1CC=C2[C@H1](CCC=3C=C(OC)C(OC)=C4O)CNC=O  
 PUGREST.BadRequest: error:  
 CC(C)N(C(C)C)C(=O)N[C@@H1]C1=CC(C(NC)=CC=C1C2=C(OC)C(OC)=C(OC)C=C2CC)=O  
 PUGREST.BadRequest: error:  
 C1C(C)NC1N[C@H1]2CCC3=CC(OC)=C(OC)C(OC)=C3C4=CC=C(C(=O)C=C42)NC=O  
 PUGREST.BadRequest: error:  
 CC(C)COC1=C(OC)C(OC)=CC=2CC[C@H1](NC(=O)C)C3=CCC(SC)=CC=C3C=21  
 PUGREST.BadRequest: error:

O=C(N[C@H]1CCC2=CC(OC)=C(OC)C(OC)=C2C3=CC=C(NC)C(=O)C=C31)N(S)CC  
PUGREST.BadRequest: error:  
O=C(N[C@H]1CCC2=CC(OC)=C(OC)C(OC)=C2C3=CC=C(NC)C(=O)C=C13)CCOCC  
PUGREST.BadRequest: error:  
O=C(N[C@H]1CCC2=CC(OC)=C(OC)C(OC)=C2C3=CC=C(NC)C(=O)C=C31)CCOCC  
PUGREST.BadRequest: error:  
COC1=CC2=CC=C(NC)C(=O)C=C2[C@@H]1(NC(=O)NC3=CC=C(F)C=C3)CCC=CC(OC)=C1OC  
PUGREST.BadRequest: error:  
COC1=C2C3=CC=C(NC)C(=O)C=C3[C@H]1(CCC2=CC(OC)=C1OC)NC(=O)N(CCCCC1)O  
PUGREST.BadRequest: error:  
COC=C1C2=CC=C(NC)C(=O)C=C2[C@@H]1(NC(=O)NC3=CC=C(F)C=C3)CCC1C=C(OC)C=COC  
PUGREST.BadRequest: error:  
COC=CC1=CC=C(NC)C(=O)C=C1[C@@H]1(NC(=S)NC2=CC=CC=C2)C1  
PUGREST.BadRequest: error:  
N=1C(=CN(N=1)[C@H]1CCCC3=CC(OC)=C(OC)C(OC)=C3C4=CC=C(NC)C(=O)C=C42)C=O  
PUGREST.BadRequest: error:  
C[C@H]1(CCC1=C(C(OC)=C(OC)C(OC)=C1)C2=CC=C(C(C=C2)N)C=O)CC=O  
PUGREST.BadRequest: error:  
C1=2[C@H]1CCC3=CC(OC)=C(OC)C(OC)=C3C1=CC=C(C(C=2)=O)SCNC(C)=O  
PUGREST.BadRequest: error:  
N1([C@H]1CCCC3=C(C(OC)=C(OC)C(OC)=C3)C4=CC=C(NC)C(C=C24)=O)C=C1I  
PUGREST.BadRequest: error:  
C1=CC(C2=CN(N=N2)[C@@H]1)3C4=CC(C(NC)=CC=C4C5=C(OC)C(OC)=C(OC)C=C5CC3)=O)=C1  
PUGREST.BadRequest: error:  
N1([C@H]1CCCC3=C(C(OC)=C(OC)C(OC)=C3)C4=CC=C(NC)C(C=C24)=O)C=C1OCC  
PUGREST.BadRequest: error:  
C12N([C@@H]1)3C4=CCC(NC)=CC=C4C5=C(OC)C(OC)=C(OC)C=C5CC3)OC=C1CC=C2O  
PUGREST.BadRequest: error:  
N1([C@H]1CCCC3=C(C(OC)=C(OC)C(OC)=C3)C4=CC=C(NC)C(=O)C=C42)COCC=CC=C1  
PUGREST.BadRequest: error:  
N1([C@H]1CCCC3=C(C(OC)=C(OC)C(OC)=C3)C4=CC=C(NC)C(C=C24)=O)C=C1C1  
PUGREST.BadRequest: error:  
C=1N([C@H]1CCCC3=C(C(OC)=C(OC)C(OC)=C3)C4=CC=C(NC)C(=O)C=C24)CCNC(=O)OCCN=1  
PUGREST.BadRequest: error:  
N1C(OC)=C(C=C1)N[C@H]1CCCC3=C(C(OC)=C(OC)C(OC)=C3)C4=CC=C(SC)C(C=C42)=O  
PUGREST.BadRequest: error:  
C1[C@@H]1(C2=CC(C(SC)=CC=C2C3=C(OC)C(OC)=C(C=C3C1)O)C)ONC(C)=O  
PUGREST.BadRequest: error:  
C1N([C@H]1)CCCC3=CC(OC)=C(OC)C(OC)=C3C4=CC=C(NC)C(=O)C=C24)OC(=CC=C1)OSC  
PUGREST.BadRequest: error:  
C1N([C@H]1)CCCC3=C(C(OC)=C(OC)C(OC)=C3)C4=CC=C(NC)C(=O)C=C42)CC=C1OC  
PUGREST.BadRequest: error:  
N(C(C)C)(C(C)C)C(=O)N1[C@H]1CCC2=C(C(OC)=C(OC)C(OC)=C2)C3=CC=C(NC)C(C=C31)=O  
PUGREST.BadRequest: error:  
N(CCCC)CC1=CN(N=N1)[C@H]1CCCC3=CC(OC)=C(OC)C(OC)=C3C4=CC=C(NC)C(=O)C=C24  
PUGREST.BadRequest: error:  
N(CCCC)CC1=CN(N=N1)[C@H]1CCCC3=C(C(OC)=C(OC)C(OC)=C3)C4=CC=C(NC)C(=O)C=C42  
PUGREST.BadRequest: error:

C1 [C@H1] (NCC)CC2=CC(C(NC)=CC=C2C3=C(C(OC)=C(OC)C=C3CC1)OC(C)=O)CC=O  
PUGREST.BadRequest: error:  
C1=C(OC)C(=C(OC)C=C1CC2[C@H1] (NC(C(O)=O)C(=O)OCC=CC2=CC=C(NC)CC)OOCN)C  
PUGREST.BadRequest: error:  
C12=C(OC)C(=C(OC)C=C1CC[C@H1] (NC(C(O)=O)=CNCC2=CC=C(NC)CC)ONCC)ONC  
PUGREST.BadRequest: error:  
C1=C(OC)C(=C(OC)C=C1CC[C@H1] (N2C(C(OCC)=O)=C(N=N2)C(OCC)=O)CCC(NC)=CC=C)ONCOC  
PUGREST.BadRequest: error:  
NC(=S)N1[C@@H1]C2=CC(C(NC)=CC=C2C3=C(OC)C(OC)=C(OC)C=C3CC1)=O  
PUGREST.BadRequest: error:  
C[C@H1] (CC1C2=CC(OC)=C(OC)C(OC)=C2C3=CC=C(C(=O)C=C31)SCN)CC  
PUGREST.BadRequest: error:  
N=NC(CO)C(O)(OCC)O[C@@H1]1C2=CC(C(NC)=CC=C2C3=C(OC)C(OC)=C(C=C3CC1)NC)=O  
PUGREST.BadRequest: error:  
C12=CC3=C(OC)C(OC)=C(OC)C=C3CC[C@H1] (NC=CC=C)C1=CC(=O)C2SC  
PUGREST.BadRequest: error:  
C1[C@@H1] (C2=CCC(NC)=CC=C2C3=C(OC)C(OC)=C(C=C3C1)OC=O)CCO  
PUGREST.BadRequest: error:  
COC1=C(OC)C=2C3=CC=C(SC)C(C=C3[C@H1] (CCC=2C=C1OC)NCC4=CC=CC)=C4O  
PUGREST.BadRequest: error:  
C=C1C2=C(OC)C(OC)=C(OC)C=C2CC[C@H1] (NCCCC1)C1=CC(=O)C(NC)=CNC  
PUGREST.BadRequest: error:  
C=C1C2=C(OC)C(OC)=C(OC)C=C2CC[C@H1] (NCCCC1)C1=CC(C(=C)NC)=O  
PUGREST.BadRequest: error:  
C=1=C2C3=C(OC)C(OC)=C(OC)C=C3CC[C@H1] (NCC)C2=CC(=O)C(SC)=CC=1NC  
PUGREST.BadRequest: error:  
C1=2[C@@H1] (CCC3=CC(OC)=C(OC)C(OC)=C3C1=CC=C(C(C=2)=O)NCNC)CONC  
PUGREST.BadRequest: error:  
C1C2=CC(OC)=C(OC)C(OC)=C2C3=CC=C(NC)C(=O)C=C3[C@H1] (C1)NC4C=CC=CS4  
PUGREST.BadRequest: error:  
C[C@@H1] (C1=CC(C(NC2)=CC=C1C3=C(OC)C(OC)=C(OC)C=C32)NC)CC  
PUGREST.BadRequest: error:  
N(C=C(O)C=C[C@@H1]1C2)=CC(C(SC)=CC=C2C3=C(OC)C(OC)=C(OC)C=C3CC1)=O  
PUGREST.BadRequest: error:  
C=1[C@H1] (NC(N)=N)CC(C2=C(C(OC)=C(OC)C=C2C)OC)=CC=C(NC)C(C=1)=O  
PUGREST.BadRequest: error:  
C1C(C2=C(OC)C(OC)=C(OC)C=C2CC[C@@H1]1NC(N)C)C=CC=C(C(C)=O)NC  
PUGREST.BadRequest: error:  
C1[C@H1] (NC(N)=S)C2=CCC(NC)=CC=C2C3=C(OC)C(OC)=C(OC)C=C3C1=O  
PUGREST.BadRequest: error:  
C=C(CN[C@H1]1CCC2=CC(OC)=C(OC)C(OC)=C2C3=CC=C(NC)C(C=C13)=O)C=O  
PUGREST.BadRequest: error:  
C1[C@H1] (NCCC)C2=CCC(SC)=CC=C2C3=C(OC)C(OC)=C(OC)C=C3CC1=O  
PUGREST.BadRequest: error:  
C1=C(N=NN1[C@H1]2CCC3=CC(OC)=C(OC)C(OC)=C3C4=CC=C(NC)C(=O)C=C24)C  
PUGREST.BadRequest: error:  
C1=C(C(C=C2[C@H1] (CCC3=CC(OC)=C(OC)C(OC)=C3C2=C1)NC(C)C)C)OSC  
PUGREST.BadRequest: error:

C1 [C@H1] (NC(N)=S) C2=CC(C(NC)=CC=C2C3=C(OC)C(OC)=C(OC)C=C3C1=O)C  
PUGREST.BadRequest: error:  
C=1C=C(NC)C(C=C2C=1C3=C(OC)C(OC)=C(OC)C=C3CC[C@@H1] 2NC(C(C)C)=O)SNC  
PUGREST.BadRequest: error:  
C=12C=C(NC)C(C=C3C=1C4=C(OC)C(OC)=C(OC)C=C4CC[C@@H1] 3NC(NCCCC=O)N)=C2O  
PUGREST.BadRequest: error:  
C=1C=C(NC)C(C=C2C=1C3=C(OC)C(OC)=C(OC)C=C3CC[C@@H1] 2NC(C(C)C)=O)SNC=O  
PUGREST.BadRequest: error:  
C1 [C@H1] (NC(N(CC=C)CC=C)=S) C2=CC(C(NC)=CC=C2C3=C(OC)C(OC)=C(C=C3C1)OC)NC=O  
PUGREST.BadRequest: error:  
C=CC=C(NC(=O)N[C@H1] 1CCC2=CC(OC)=C(OC)C(OC)=C2C3=CC=C(NC)C(=O)C=C13)C  
PUGREST.BadRequest: error:  
C=CC=C(NC([C@@H1] C1=CCC(SC)=CC=C1C2=C(OC)C(OC)=C(OC)C=C2CC)=O)N=O  
PUGREST.BadRequest: error:  
C1=2 [C@H1] (CCC3=CC(OC)=C(OC)C(OC)=C3C1=CC=C(C(=O)C=2)SCNC(C)=O)C=C  
PUGREST.BadRequest: error:  
C=CC=C(NC(=O)N[C@H1] 1CCC2=CC(OC)=C(OC)C(OC)=C2C3=CC=C(NC)C(C=C13)=O)C  
PUGREST.BadRequest: error:  
C=1NCC(=O)C=C2 [C@H1] (CCC3=C(C(OC)=C(OC)C(OC)=C3)C2=CC=1)NC(C(C)C)=O  
PUGREST.BadRequest: error:  
C=CC=C(NC(=O)N[C@H1] 1CCC2=CC(OC)=C(OC)C(OC)=C2C3=CC=C(NC)C(=O)C=C31)C  
PUGREST.BadRequest: error:  
C1=CC=C(NC(=O)N[C@H1] 2CCC3=CC(OC)=C(OC)C(OC)=C3C=4C2=CC(C(NC)=CC=4)=O)C1  
PUGREST.BadRequest: error:  
C [C@H1] (CCC1=CC(OC)=C(OC)C(OC(OC)=O)=C1C2=CC=C(SC)C(=O)C=C2)NCC  
PUGREST.BadRequest: error: CCN[C@H1] ([C@H1])C1OC(C)(C2)O[C@@H1] 1 [C@H1] (CNC(=S)N  
[C@H1] CCC3=C(C(OC)=C(OC)C(OC)=C3)C4=CC=C(C(=O)C=C24)NC)O  
PUGREST.BadRequest: error:  
CNCC(O)C(OC=C1C=C2C3=C(OC)C(OC)=CC=C3CC[C@H1] (NC(C)=O)C2=CC1)=O  
PUGREST.BadRequest: error:  
COCC(CN[C@@H1] 1C=2C(C3=C(C(OC)=C(OC)C=C3CC1)OC)=CC=C(NC)C(C=2)=O)F  
PUGREST.BadRequest: error:  
N=NC(CN1C(=O)OC)=C=C(C=CC=CNCC=CC)C2(NC)C(C(O)=CC2C3=C(OC)C(OC)=C(OC)C=C3CC1OC  
PUGREST.BadRequest: error:  
NC1=NN=NN1 [C@@H1] 2C=3C(C4=C(C(OC)=C(OC)C=C4CC2)OC)=CC=C(NC)C(C=3)=O  
PUGREST.BadRequest: error:  
N=NC(CNC(=O)OC)=C=C(C=CC=CNCC=CC12)C(NC)C(OC)=C(OC)C=C1CC[C@H1] (NC(=O)C)C2F  
PUGREST.BadRequest: error:  
N=NC(CNC(=O)OC)=C=C(C=CC=CNCC=CC12)C(NC)C(OC)=C(OC)C=C1CC[C@H1] (NC(=O)C)C2=CC  
PUGREST.BadRequest: error:  
N1C=NN=NN1 [C@H1] 2CCC3=C(C(OC)=C(OC)C(OC)=C3)C4=CC=C(NC)C(=O)C=C24  
PUGREST.BadRequest: error:  
OCCN(CCO)C(=S)N1 [C@@H1] C2=CC(C(NC)=CC=C2C3=C(OC)C(OC)=C(OC)C=C3CC1)=O  
PUGREST.BadRequest: error:  
N12C=NN=NN1 [C@H1] 3CCC4=C(C(OC)=C(OC)C=C4C=5C3=CC(C(NC)=CC=5)=O)OCC=C2  
PUGREST.BadRequest: error: N=NC(CNC(=O)OC)=C=C(C=CC=CNCC=CC=1)C2(NC)C(C(O)=CC=1  
C3=C(OC)C(OC)=C(OC)C=C3CC2OOC  
PUGREST.BadRequest: error:



N1CC=CN([C@@H1]2C3=CC(C(NC)=CC=C3C4=C(CC2)C=C(OC)C(OC)=C4OC)=O)C1C  
 PUGREST.BadRequest: error:  
N=NC(CNC(=O)OC)=C=C(C=CC=CNCC=CC1)C(NC)C(OC)=C(OC)C=C1CC[C@H1](NC(=O)C)C=CC  
 PUGREST.BadRequest: error:  
NC(C(OC)=C)N[C@H1]1CCC2=CC(OC)=C(OC)C(OC)=C2C3=CC=C(NC)C(=O)C=C31  
 PUGREST.BadRequest: error:  
NC(C(OC)=C)N[C@H1]1CCC2=CC(OC)=C(OC)C(OC)=C2C3=CC=C(NC)C(=O)C=C13  
 PUGREST.BadRequest: error:  
N([C@H1]1CCC2=CC(OC)=C(OC)C(OC)=C2C3=CC=C(NC)C(C=C13)=O)=N  
 PUGREST.BadRequest: error:  
NC(C(OC)=C)N[C@H1]1CCC2=CC(OC)=C(OC)C(OC)=C2C3=CC=C(NC)C(C=C13)=O  
 PUGREST.BadRequest: error:  
NC(CCC)N[C@@H1]1C2=CC(C(NC)=CC=C2C3=C(OC)C(OC)=C(OC)C=C3CC1)=O  
 PUGREST.BadRequest: error:  
N([C@H1]1CCC2=CC(OC)=C(OC)C(OC)=C2C3=CC=C(NC)C(C=C31)=O)=C  
 PUGREST.BadRequest: error:  
N([C@H1]1CCC2=CC(OC)=C(OC)C(OC)=C2C3=CC=C(NC)C(C=C13)=O)C=CC=C  
 PUGREST.BadRequest: error:  
N([C@H1]1CCC2=CC(OC)=C(OC)C(OC)=C2C3=CC=C(NC)C(C=C13)=O)=CC  
 PUGREST.BadRequest: error:  
C1=2[C@H1](CCC3=C(C(OC)=C(OC)C(OC)=C3)C1=CC=C(C(C=2)=O)NCNCC(C)C)ONC  
 PUGREST.BadRequest: error:  
C1=2[C@H1](CCC3=C(C(OC)=C(OC)C(OC)=C3)C1=CC=C(C(C=2)=O)NCNCC)OCSC  
 PUGREST.BadRequest: error:  
C12[C@@H1](CC(C3=C2C(OC)=C(OC)C=C3C1)OC=CC=C(NC)CC)ONC(C)=O  
 PUGREST.BadRequest: error: N(C)C=1C(=O)C=C2[C@H1](CCC3=C(C(OC)=C(OC)C(OC)=C3)C2=CC=1)N4C(C(=O)O)=C(N=N4)C(=O)N  
 PUGREST.BadRequest: error:  
C1[C@H1](NCC)CC2=CC(C(NC)=CC=C2C3=C(C(OC)=C(OC)C=C3CC1)OC(C)=O)(C)ONC=O  
 PUGREST.BadRequest: error:  
N(CCCC)CNCC1=CN(N=N1)[C@H1]2CCC3=CC(OC)=C(OC)C(OC)=C3C4=CC=C(NC)C(=O)C=C24  
 PUGREST.BadRequest: error:  
C12[C@H1](NCC)CC3=CC2(C(SC)=CC=C3C4=C(C(OC)=C(OC)C=C4CC1)OCNC(C)=O)NC  
 PUGREST.BadRequest: error:  
C1=C(O)C(OC)=C(OC)C=CCC[C@H1](NN=NCC(O)=O)OC2=CC(C(NC)=CC=C12)=O  
 PUGREST.BadRequest: error:  
C12=C(OC)C(=C(OC)C=C1CC[C@H1](NC(C(=O)OCC)=C(COCC)OCCC(NC)=CC=CON)C=C2N)C  
 PUGREST.BadRequest: error:  
N(C)C=1C(=O)C=C2[C@H1](CCC3=C(C(OC)=C(OC)C(OC)=C3)C2=CC=1)NC(C(=O)O)=C(COCC)C=O  
 PUGREST.BadRequest: error: N(C)C=1C(=O)C=C2[C@H1](CCC3=CC(OC)=C(OC)C(OC)=C3C2=C(C=1N4)C(C(=O)O)=C(N=N4)C(O)=O  
 PUGREST.BadRequest: error:  
C12=C(OC)C(=C(OC)C=C1CC[C@H1](NC(C(=O)OCC)=C(COCC)OCCC(NC)=CC=CON)C=C2)NC  
 PUGREST.BadRequest: error: O=C(C=C(C(OC1C2)=O)N(N=N2)[C@@H1]3C=4C(C5=C(C(OC)=C(OC)C=C5CC3)OC)=CC=C(NC)CC=4)OC(C1)=C1C  
 PUGREST.BadRequest: error: O=C(C=C(C(OC1)=O)N(N=N1)[C@@H1]2C=3C(C4=C(C(OC)=C(O)C)C=C4CC2)OC)=CC=C(NC)CC=3)OC(C1)=CC  
 PUGREST.BadRequest: error: O=C(C=C(C(OC1)=O)N(N=N1)[C@@H1]2C=3C(C4=C(C(OC)=C(O)C)C=C4CC2)OC)=CC=C(NC)CC=3)OC(C1)=CC

C)C=C4CC2)OC)=CC=C(NC)CC=3)OC(C1)=C  
PUGREST.BadRequest: error: 0=C(C=C(C(OC1)=O)N(N=N1)[C@@H1]2C=3C(C4=C(C(OC)=C(O  
C)C=C4CC2)OC)=CC=C(NC)CC=3)OC=CCCC  
PUGREST.BadRequest: error:  
OC(\N[C@H1]1CCC2=CC(OC)=C(OC)C(OC)=C2C3=CC=C(C(C=C31)=O)NCNC(C)C)=O  
PUGREST.BadRequest: error:  
O1CC(C2)=CC(=C13)C4=C(OC)C(OC)=C(OC)C=C4CC[C@H1](NC(NC5=CC=C(C=C5)C1)=S)C3=CC2=O  
PUGREST.BadRequest: error: N1=CC=C(C=C1)C(NCC=2N=NN(C=2)[C@H1]3CCC4=CC(OC)=C(OC  
)C(OC)=C4C5=CC=C(C(C=C53)=O)N)C=O  
PUGREST.BadRequest: error:  
OC(NCC1=CC(OC)=C(OC)C=C1CC[C@H1](NCN(CC)CC)C2=CCC(NC)=CC=C2)=O  
PUGREST.BadRequest: error:  
NC(=CN/C(=NC(O)C=CCI)C1=CN(NC1)C=CC2=CC(NC)=CC(OC)=C2C=CC(OC3)C(OC)=CC=C3)C=CC=O  
PUGREST.BadRequest: error:  
O=CC(=CC1=CC([C@@H1](NC(C(O)=O)=C(N=C)CCCC2)CC(OC)=C(OC)C(OC)=C21)NC)O  
PUGREST.BadRequest: error: NC(=CN/C(=NC(O)C=CCI)C1=CN(N2C1)C=CC3=CC(NC)=CC(OC)=  
C3C=CC4(OC)C(OC)=CC=C4)CC[C@H1]2N=O  
PUGREST.BadRequest: error: 0=CC(=CC=C1C([C@@H1](N2C(C(O)=O)=C(N=C2)C(=O)C)CCC3=  
CC(OC)=C(OC)C(OC)=C31)=C)NC=O  
PUGREST.BadRequest: error:  
OCC(C)=C1C([C@H1](CCC2=CC(OC)=C(OC)C(OC)=C12)NC(NC3=CC=C(C=C3)F)=O)PNC=O  
PUGREST.BadRequest: error: 0=CC(=CC=C1C([C@@H1](N2C(C(=O)O)=C(C(=O)O)N=N2)CCC3=  
CC(OC)=C(OC)C(OC)=C31)=C)NC=O  
PUGREST.BadRequest: error:  
OC(\N[C@H1]1CCC2=CC(OC)=C(OC)C(OC)=C2C3=CC=C(C(C=C13)=O)NCNC(C)C)=O  
PUGREST.BadRequest: error: N1=CC=C(C=C1)C(NCC=2N=NN(C=2)[C@@H1]3C4=CCC(NC)=CC=C  
4C5=C(OC)C(OC)=C(OC)C=C5CC3)=O  
PUGREST.BadRequest: error: N1=CC=C(C=C1)C(NCC=2N=NN(C=2)[C@@H1]3C4=CCC(NC)=CC=C  
4C5=C(OC)C(OC)=C(C=C5CC3)OC)=O  
PUGREST.BadRequest: error:  
CC(C)(C)OC(=O)/N=C(/N[C@H1]1CCC2=C(C(OC)=C(OC)C(OC)=C2)C3=CC=C(NC)C(C=C13)=O)N=N  
PUGREST.BadRequest: error: CC(C)(C)OC(=O)NCCCNCC1=CN(N=N1)[C@H1]2CCC3=CC(OC)=C(  
OC)C(OC)=C3C4=CC=C(NC)C(=O)C=C42  
PUGREST.BadRequest: error:  
CC(C)(C)OC(=O)/N=C(/N[C@H1]1CCC2=C(C(OC)=C(OC)C(OC)=C2)C3=CC=C(NC)C(C=C31)=O)N=N  
PUGREST.BadRequest: error:  
C(=CNCNC(=O)OCC(C1)(C1)C1)[C@H1]CCC1=C(C(OC)=C(OC)C(OC)=C1)C2=CC=C(NC)C(=O)C=C2  
PUGREST.BadRequest: error: CC(C)(C)OC(=O)NCCCNCC1=CN(N=N1)[C@H1]2CCC3=CC(OC)=C(  
OC)C(OC)=C3C4=CC=C(NC)C(=O)C=C24  
PUGREST.BadRequest: error: C1=C(OC)C(OC)=C(OC=2)C=3CC([C@H1](CCC=3)C(C(O)=O)=C(  
COC(=O)CCC=C1)CCC(=CC=2)NC)=O  
PUGREST.BadRequest: error:  
CSCC(=O)C=C1C(C2=C(OC)C(OC)=C(C=C2CC[C@@H1]1NCN)N)OCC  
PUGREST.BadRequest: error: CNCCC=C1C(C2=C(OC)C(=C(C=C2CC[C@@H1]1NCN)C)OO)COC  
PUGREST.BadRequest: error: COC1=CC2=C(C3=C(OC)C(OC)=CC=C3CC[C@@H1]2NOC)CC=C1OC  
PUGREST.BadRequest: error: CNCC(C=C1C(C2=C(OC)C(=CC=C2CC[C@@H1]1NCN)C)=O)COC  
PUGREST.BadRequest: error: CNCC(C=C1C(C2=C(OC)C=C(OC)C=C2CC[C@@H1]1NC=O)C)OC=O  
PUGREST.BadRequest: error:

COC1=C2C3=CC=C(SC)C(=O)C=C3[C@H1](CCC2=CC(OC)=C1OC)NCCC  
 PUGREST.BadRequest: error:  
C=C1C=2C[C@H1](CC(C3=CC(OC)=C(OC)C=C31)C=CC=CSC)C(=O)C=2  
 PUGREST.BadRequest: error: COC=C1C2=CC=C(NC)C(=O)C=C2[C@H1](CCC1C=COC)NCCCC1  
 PUGREST.BadRequest: error:  
C=1NCC=1C=C2C(C3=C(OC)C(=C(OC)C=C3CC[C@@H1]2N)[N+1]=[N-1])OC=CC  
 PUGREST.BadRequest: error: C1=C2CC[C@H1](C3=CCC(SC)=CC=C3C2=C(OC)C(=C1OC)OC=O)N  
 PUGREST.BadRequest: error:  
C=C1CC[C@H1](CC(C2=CC(OC)=C(OC)C=C21)C=CC=CSC)C(=O)CN  
 PUGREST.BadRequest: error:  
C=C1CC[C@H1](C=2C(C3=CC(OC)=C(OC)C=C31)C=CC=CSC)C(C=2)=O  
 PUGREST.BadRequest: error:  
COC1=C2C3=CC=C(NC)C(C=C3[C@@H1](NCCCCC)CCC2=CC(=C1OC)O)C=O  
 PUGREST.BadRequest: error:  
C=C1CC=2[C@H1](CC(C3=CC(OC)=C(OC)C=C31)C=CC=CSC)C(C=2)=O  
 PUGREST.BadRequest: error:  
COC1=C2C3=CC=C(NC)C(=O)C=C3[C@H1](CCC2=CC(OC)=C1OC)NCCCCCSC  
 PUGREST.BadRequest: error:  
C=C(CO)CN[C@H1]1CCC2=CC(OC)=C(OC)C(OC)=C2C3=CC=C(SC)C(=O)C=C31  
 PUGREST.BadRequest: error:  
CC(C)CN[C@H1]1CCC2=CC(OC)=C(OC)C(OC)=C2C3=CC=C(C(C=C31)=O)SCC  
 PUGREST.BadRequest: error:  
CC(C)CCN[C@H1]1CCC2=CC(OC)=C(OC)C(OC)=C2C3=CC=C(C(C=C13)=O)SCC  
 PUGREST.BadRequest: error:  
C=1NCC(=O)C=C2C(C3=C(OC)C(OC)=C(C=C3CC[C@@H1]2NCCC#N)C)=CC=1  
 PUGREST.BadRequest: error: C12=CCC[C@H1]2CC1(C3=CC(OC)=C(OC)C(OC)=C3)CC=C  
 PUGREST.BadRequest: error:  
C1=C2CC[C@H1](C3=CCC(SC)=CC=C3C2=C(C(OC)=C1OC)OON)CNCCC  
 PUGREST.BadRequest: error:  
C1=C2CC[C@H1](C3=CCC(SC)=CC=C3C2=C(OC)C(=C1OC)OC=O)NCCCC  
 PUGREST.BadRequest: error:  
CC(C)CCN[C@H1]1CCC2=CC(OC)=C(OC)C(OC)=C2C3=CC=C(SC)C(C=C31)=O  
 PUGREST.BadRequest: error:  
C1=C(CO2)CN1C[C@@H1]C3=CC(C(SC)=CC=C3C4=C(OC)C(OC)=C(OC)C=C4CC2)=O  
 PUGREST.BadRequest: error:  
C=C1CC=2[C@H1](CC(C3=CC(OC)=C(OC)C=C31)C=CC=CSC)C(=O)C=2N=[N+1]=[N-1]  
 PUGREST.BadRequest: error:  
CNCC(C1=C2C(C3=C(OC)C(=C(OC)C=C3CC[C@@H1]2NCCC#N)OC)=CC1)=O  
 PUGREST.BadRequest: error:  
N=1NC=1[C@H1]2C3=CC(C(NC)=CC=C3C4=C(C=C(OC)C(=C4OC)OC)CC2)=O  
 PUGREST.BadRequest: error:  
C1=C2CC[C@H1](C3=CCC(NC)=CC=C3C2=C(OC)C(=C1OC)OC)ONCCC#N  
 PUGREST.BadRequest: error:  
COC=C1C2=CC=C(NC)C(C=C2[C@@H1](NCCCCC)CCC1=CC(=COC)OC)=O  
 PUGREST.BadRequest: error:  
COC1=C2CC([C@H1](CCC2=CC(OC)=C1OC)NCCC#N)C(C(=CC)NC)=O  
 PUGREST.BadRequest: error:  
C1=C2CC[C@H1](C3=CCC(NC)=CC=C3C2=C(OC)C(=C1OC)OC=O)NCCCCCCCCC

PUGREST.BadRequest: error:  
COC=C1C2=CC=C(NC)C(C=C2[C@@H1](NCCCCCCCCC)CCC1=CC(=COC)OC)=O  
PUGREST.BadRequest: error:  
COC=C1C2=CC=C(NC)C(C=C2[C@@H1](NCCCCCCCCC)CC=CC(=C1OC)OC=O)CC  
PUGREST.BadRequest: error:  
COC1=C2CC([C@H1](CCC2=CC(OC)=C1OC)N3N=NC=C3)CN=CC(C(=CC)NC)=O  
PUGREST.BadRequest: error:  
C1NCC(=O)C=C2C(C3=C(OC)C(OC)=C(OC)C=C3CC[C@@H1]2N4C=C(N=N4)CNN)=CC=C1  
PUGREST.BadRequest: error:  
COC=C1C2=CC=C(NC)C(C=C2[C@@H1](N3C=C(N=N3)CCCC)CCC=CC(=C1OC)O)C=O  
PUGREST.BadRequest: error:  
COC1=C2CC([C@H1](CCC2=CC(OC)=C1OC)NC/C=C/C3=CC=CC)=C3CC(C(SC)=CC)=O  
PUGREST.BadRequest: error:  
COC1=C2CC([C@H1](CCC2=CC(OC)=C1OC)N3N=NC=C3)CN=CC(=O)C(NC)=CC  
PUGREST.BadRequest: error:  
COC1=C2C3=CC=C(NC)C(=O)C=C3[C@H1](CCC2=CC(OC)=C1OC)NCC(C)C  
PUGREST.BadRequest: error:  
COC=C1C2=CC=C(NC)C(C=C2[C@@H1](NCC(C)C)CCC1=CC(=COC)OC)=O  
PUGREST.BadRequest: error:  
C1=C2CC[C@H1](C3=CCC(SC)=CC=C3C2=C(OC)C(=C1OC)OC=O)NCCC  
PUGREST.BadRequest: error:  
C1=C2CC[C@H1](C3=CCC(SC)=CC=C3C2=C(C(OC)=C1OC)OON)COCC  
PUGREST.BadRequest: error:  
COC1=C(OC)C(OC)=CC=2CC[C@@H1](C3=CC(C(=CC=C3C1=2)SC)=O)NCCC(C)CC  
PUGREST.BadRequest: error:  
C12=CC(C(SC)=CC=C1C=C(CC[C@@H1]2NCCC3=CC=CC=C3)C=C(OC)C(OC)=CO)C=O  
PUGREST.BadRequest: error:  
C1=C2C(C3=C(C(OC)=C(OC)C=C3CC[C@@H1]2NCCC(F)F)F)OC=CC=C(C1=O)NC  
PUGREST.BadRequest: error:  
C12=CC(C(NC)=CC=C1C3=C(C=C(OC)C(OC)=C3OC)CC[C@@H1]2NCCC(F)F)F  
PUGREST.BadRequest: error:  
C1=C2C([C@H1](CCC3=CC(OC)=C(C(OC)=C23)OC)NCCCC1)C(=O)C(=C1)NC  
PUGREST.BadRequest: error:  
C12=CC(C(NC)=CC=C1C3=C(C=C(OC)C(OC)=C3OC)CC[C@@H1]2NCC=4SC=CC=4OC)=O  
PUGREST.BadRequest: error:  
C12=CCC(NC)=CC=C1C3=C(OC)C(=C(C=C3CC4[C@@H1]2NCC4CCCOC)OC)O  
PUGREST.BadRequest: error:  
O=CC1=CN=NN1[C@H1]2CCC3=CC(OC)=C(OC)C(OC)=C3C4=CC=C(C(C=C24)=O)NCCC  
PUGREST.BadRequest: error:  
C12=NCCC13[C@H1](CNC(CCC=CC=CC3=O)=C(OC)C(OC)=C(OC)C)C2SC=CCNC  
PUGREST.BadRequest: error:  
C1=CN=CC=C1CN[C@H1]2CCC3=CC(OC)=C(OC)C(OC)=C3C4=CC=C(C(C=C42)=O)SCC(=O)C  
PUGREST.BadRequest: error:  
O=CC1=CN=NN1[C@H1]2CCC3=CC(OC)=C(OC)C(OC)=C3C4=CC=C(C(C=C42)=O)NCCC  
PUGREST.BadRequest: error:  
C1=CN=CC=C1CN[C@H1]2CCC3=CC(OC)=C(OC)C(OC)=C3C4=CC=C(C(C=C42)=O)SCC  
PUGREST.BadRequest: error:  
C1=NCCC12[C@H1](CC3C=CC(OC)=C(OC)C(OC)=O)C=CC=C23)C(C)=O

PUGREST.BadRequest: error:  
C12[C@H1]C=CCC[C@H1](N=C(COCC)CC3=CCC(NC)=CC=C31)C(OC)C(OC)=C2OC=O  
PUGREST.BadRequest: error:  
OC1=CC=C(C=C1)CN[C@@H1]2C3=CC(C(SC)=CC=C3C4=C(C(OC)=C(OC)C=C4CC2)OC)=O  
PUGREST.BadRequest: error:  
O=CC1=C2[C@H1](CCC3=CC(OC)=C(OC)C(OC)=C3C2=CC=C(OC(=O)CC)C1=O)CC=O  
PUGREST.BadRequest: error:  
C=C1N=CC(C)N1CN[C@H1]2CCC3=C(C(OC)=C(OC)C(OC)=C3)C4=CC=C(C(C=C24)=O)NC  
PUGREST.BadRequest: error:  
OC1=CC=C(C=C1)CN[C@H1]2CCC3=C(C(OC)=C(OC)C(OC)=C3)C4=CC=C(C(C=C42)=O)SC  
PUGREST.BadRequest: error:  
O=CC1=C2[C@H1](CCC=C3C(OC)=C(OC)C(OC(C)=O)=C3C1=CC=C(SC)C2=O)CC=O  
PUGREST.BadRequest: error:  
C1=CC2C[C@H1](NC(C)=O)C3=CC(C(SC)=CC=C3C2=C(OC)C(OC)=C1OC(C4=CC=CC=C4)=O)SC=O  
PUGREST.BadRequest: error:  
OC1=CC=C(C=C1)CN[C@@H1]2C3=CC(C(SC)=CC=C3C4=C(OC)C(OC)=C(OC)C=C4CC2)=O  
PUGREST.BadRequest: error:  
O=CC1=C[C@H1](CCC2=CC(OC)=C(OC)C(OC(=O)C)=C2C1=CC=C(SC)C=O)CC=O  
PUGREST.BadRequest: error:  
CNCC(C)OC(=O)N[C@H1]1CCC2=C(C(OC)=C(OC)C(OC)=C2)C3=CC=C(C(=O)C=C31)NCF  
PUGREST.BadRequest: error:  
C1OC2=CC=C(C(OC)=C2OC)C3=CC=C(SC)C1(C=C3[C@@H1](NC(N(COC)C)O)C=C)ONC  
PUGREST.BadRequest: error:  
COC1=C2C=C(C(OC)=C1OC)C3=CC=C(SC)C(C=C3[C@@H1](NCN=CC=C(F)C=COC)C2)NC=O  
PUGREST.BadRequest: error:  
C1OC2=CC=C(C(OC)=C2OC)C3=CC=C(SC)C(C=C3[C@@H1]1CCC(=O)C(OC)=C(O)CSCSC  
PUGREST.BadRequest: error:  
C=C1CC[C@H1](N2C(C(OC)=O)=C(N=N2)C=CC(=O)C3NC)CC=CC=C3C=C1CNCOCOC  
PUGREST.BadRequest: error:  
OC=CC=CCCN[C@H1]1CCC2=CC(OC)=C(OC)C(=C2C3=CC=C(SC)C(=O)C=C13)OCC  
PUGREST.BadRequest: error:  
COC1=CC=C(C(OC)=C1OC)C2=CC=C(SC)C(C=C2[C@@H1]NC(N(COC)C)=C)ONC=O  
PUGREST.BadRequest: error:  
C=C1CC2[C@H1](NC(C(=O)OCC)=C2)C3=CC(C(NC)=CC=C3C4=C(C(OC)=C(C=C41)OC)OC)=O  
PUGREST.BadRequest: error:  
C1=CC=2C[C@H1](NCN(C(C)C)C(C)C)OC3=CC(C(NC)=CC=C3C=2C=C(C(=C1)OC)OC)NC=O  
PUGREST.BadRequest: error:  
COC1=C2C=C(C(OC)=C1OC)C3=CC=C(NC)C(C=C3[C@@H1](NC(N(COC)C)O)CC2)NC=O  
PUGREST.BadRequest: error:  
C1OC2=CC=C(C(OC)=C2OC)C3=CC=C(SC)C(C=C3[C@@H1]1CCC(=O)C(OC)=C(C)=O  
PUGREST.BadRequest: error:  
COC1=CC2=C(C(OC)=C1OC)C3=CC=C(SC)C2(C=C3[C@@H1]NC(N(COC)C)=C)ONC  
PUGREST.BadRequest: error:  
CC12[C@H1](CCC3=CC(OC)=C(OC)C(OC)=C3C1=CC=CC(=O)C2)SCNC(C)=O  
PUGREST.BadRequest: error:  
C=CC=C(CCN[C@H1]1CCC2=CC(OC)=C(OC)C(OC)=C2C3=CC=C(SC)C(C=C31)=O)OC  
PUGREST.BadRequest: error:  
CCOC(OC1=C2CC([C@H1](CCC2=CC(OC)=C1OC)NC(C)=O)=CC(C(SC)=CC)=O)SC=O

PUGREST.BadRequest: error:  
CC12[C@@H1](CCC3=CC(OC)=C(OC)C(OC)=C3C1=CC=CC(C2)=O)SCNC(C)=O  
PUGREST.BadRequest: error:  
C1C=CC=C(SCC1)C=CN(N2C3OC)[C@@H1]2NC(=O)CNC(=O)OCCCC4C=CC(=C)C=C4C=CC=C(NC)CCC3  
PUGREST.BadRequest: error:  
CC1=C2C=C(SC)C(C=C1[C@@H1])(NC(C)=O)CCC=CC(OC)=C(OC)COC=CC=C2SC)=O  
PUGREST.BadRequest: error:  
CC1=CC=C(S=2C)C(C=C1[C@@H1])(NC(=O)C)CCC=CC(OC)=C(OC)C(OC=CC=O)C=2)SC=O  
PUGREST.BadRequest: error:  
C1COC1(OC2=CC=C3C4=C(OC)C(OC)=C(OC)C=C4CC[C@@H1](C3=CC2=O)SC(C)=O)SC  
PUGREST.BadRequest: error:  
CC1=CC=C(S=2C)C(C=C1[C@@H1])(NC(C)=O)CCC=CC(OC)=C(OC)C(OC=CC=O)C=2)SC=O  
PUGREST.BadRequest: error:  
C1C=CC=C(SC2C1)C3=C(C(OC)=C(OC)C=C3CC[C@@H1]2NC(C)=O)OC=CC=C(SC)C=O  
PUGREST.BadRequest: error:  
CC1=C2C=C(SC)CC=C1[C@@H1](NC(=O)C)CCC=CC(OC)=C(OC)C(OC=CC2)=O  
PUGREST.BadRequest: error:  
C=C1C(C2=C(C(OC)=C(OC)C=C2CC[C@@H1]1NC(C)=O)OC)(C3=CC=CC=C3)OCC=C(SC)C=O  
PUGREST.BadRequest: error:  
C1=C2C(C(OC(CC)=O)=CC=C1C3=C(OC)C(OC)=C(OC)C=C3CC[C@@H1]NSC=CC2)=O  
PUGREST.BadRequest: error:  
OC(NC(=O)OC)C=CC=C1C([C@@H1])(CCC2=CC(OC)=C(OC)C(OC)=C21)N=C)C=O  
PUGREST.BadRequest: error:  
O1C(OC(=O)OC)=CC2=CC([C@@H1])(NC(C)=O)CCC3=CC(OC)=C(OC)C(OC)=C32)=CC1NC  
PUGREST.BadRequest: error:  
C=1=CC(C(C=C2[C@@H1])(CCC3=C(C(OC)=C(OC)C(OC)=C3)C2=1)NC(C)=O)=C)=O  
PUGREST.BadRequest: error:  
C1[C@@H1](C2=CC(C(OC)=CC=C2C3=C1C=C(OC)COC)=C3OC=O)CC=O  
PUGREST.BadRequest: error:  
C=CC(C(OC(CC)=O)=CC=CC1=C(OC)C(OC)=C(OC)C=C1CC[C@@H1]NSC(=O)CC)=O  
PUGREST.BadRequest: error:  
O=C(OC1=C2C(CC[C@@H1])(NC(=O)C)C3=CC(C(SC)=CC=C32)=O)=CC(OC)=C1OC)SCC  
PUGREST.BadRequest: error:  
CN(C(=S)N[C@@H1]1C2=CCC(NC)=CC=C2C3=C(C(OC)=C(OC)C=C3CC1)OC)OC  
PUGREST.BadRequest: error:  
C1=C2C3(C(OC(C)=O)=CC=C1C4=C(OC)C(OC)=C(OC)C=C4CC[C@@H1]3NSC=C)C2=O  
PUGREST.BadRequest: error:  
O1C(OC(=O)OC2)=CC=CC([C@@H1])(NC(C)=O)CCC3=CC(OC)=C(OC)C(OC)=C32)=CC1NC  
PUGREST.BadRequest: error:  
N1([C@@H1]2CCC=C(C(OC)=C(OC)C(OC)=C2C3=CC=C(SC)CC=C3)OC=C1)F  
PUGREST.BadRequest: error:  
O=C(OC1=C2CC([C@@H1])(CCC2=CC(OC)=C1OC)NC(C)=O)=CC(C(SC)=CC)=O)C  
PUGREST.BadRequest: error:  
C1N(C(=O)N[C@@H1]2CCC3=CC(OC)=C(OC)C(OC)=C3C4=CC=C(NC)CC=C24)OC=C1  
PUGREST.BadRequest: error:  
NC(=CN(NCC)CCCCN1[C@@H1]C=C2CC(C)=CC=C2C3=C(CC1)C=C(OC)C(OC)=C3OC)OF  
PUGREST.BadRequest: error:  
OC=C(OC)C=C1C(C2=CC=C(SC)C(C=C2[C@@H1])(CC1)NC(C)=O)OCC)=O

PUGREST.BadRequest: error:  
O=C1C=CC=C2C([C@H1](CCC3=CC(OC)=C(OC)C(OC)=C32)NC(C)=O)=C1SC  
 PUGREST.BadRequest: error:  
C1=CC=C(C=C1)CN[C@H1]2CCC3=CC(OC)=C(OC)C(OC)=C3C4=CC=C(C(C=C42)=O)SCC  
 PUGREST.BadRequest: error:  
O=CC(=CC=C1C([C@H1](CCC2=CC(OC)=C(OC)C(OC)=C21)NC(C)=O)SC)O  
 PUGREST.BadRequest: error:  
N=1C(=CN(N=1)[C@@H1]2C3=CCC(NC)=CC=C3C4=C(OC)C(OC)=C(OC)C=C4CC2)F  
 PUGREST.BadRequest: error:  
CC=CCCCN[C@H1]1CCC2=CC(OC)=C(OC)C(OC)=C2C3=CC=C(SC)C(C=C13)=O  
 PUGREST.BadRequest: error:  
C1=CC=C(S1C)C2=CN(NC2)[C@H1]3CCC4=CC(OC)=C(OC)C(OC)=C4C5=CC=C(NC)C(=O)C=C35  
 PUGREST.BadRequest: error:  
OC1=C(C=CC=C1)CN2[C@H1]CCC3=CC(OC)=C(OC)C(OC)=C3C4=CC=C(SC)C(C=C24)=O  
 PUGREST.BadRequest: error:  
OC=C(OC)C=C1C(C2=CC=C(SC)C(C=C2[C@@H1](NC(C)=O)CC1)=O)(C)OSC  
 PUGREST.BadRequest: error: C=C1CC(=C2C=C(SC)CC=C[C@H1]CCC2=CC(OC)=C1O)C(OC)=O  
 PUGREST.BadRequest: error:  
OC1=C(C=CC=C1)CN[C@@H1]2C3=CC(C(SC)=CC=C3C4=C(CC2)C=C(OC)C(OC)=C4OC)SC=O  
 PUGREST.BadRequest: error:  
C1=C2CC[C@H1](C3=CCC(NC)=CC=C3C2=C(C(OC)=C1OC)OC=O)NCCCCC  
 PUGREST.BadRequest: error:  
COC1=C2C3=CC=C(NC)C(C=C3[C@@H1](NCCCCCCCC)CCC1=CC=C2OC)OC=O  
 PUGREST.BadRequest: error:  
C=1NCC(=O)C=C2C=1C3=C(OC)C(OC)=C(C=C3CC[C@@H1]2NCCCCCO)C=CC  
 PUGREST.BadRequest: error:  
C=C1CC2[C@H1](CCC3=C(C(OC)=C(OC)C(=C3)OC)C2=CC=C1)SC=O  
 PUGREST.BadRequest: error:  
C1OC2=C3C4=CC=C(NC)C(=O)C=C4[C@H1](CCC3=CC(OC)=C2OC)NCCCCC=C1  
 PUGREST.BadRequest: error:  
COC=C1C2=C3C=C(NC)C(C=C2[C@@H1](NCCCCCCCC)CCC1=CC(=C3OC)O)OC  
 PUGREST.BadRequest: error:  
COC1=C2C3=CC=C(NC)C(=O)C=C3[C@H1](CCC2=CC(OC)=C1OC)NCCCCCCCCSC  
 PUGREST.BadRequest: error:  
COC1=C2C3=CC=C(NC)C(C=C3[C@@H1](NCCCCCCCC)CCC1=CC(=C2OC)OCS)C=O  
 PUGREST.BadRequest: error:  
C1=C2CC[C@H1](C3=CCC(SC)=CC=C3C2=C(C(OC)=C1OC)OC=O)NCCCCC  
 PUGREST.BadRequest: error:  
COC=CC1=C2C=C(NC)C(C=C1[C@@H1](NCCCCCCCC)CCC=CC(=C2OC)O)C=O  
 PUGREST.BadRequest: error:  
C1=C2CC[C@H1](C3=CCC(NC)=CC=C3C2=C(OC)C(=C1OC)OC)ONCCCCC  
 PUGREST.BadRequest: error:  
COC=C1C2=CC=C(NC)C(C=C2[C@@H1](NCCCCC)CCC1=CC(=COC)OC)SC=O  
 PUGREST.BadRequest: error:  
C1=C2CC[C@H1](C3=CCC(SC)=CC=C3C2=C(OC)C(=C1OC)OC=O)NCCCCC  
 PUGREST.BadRequest: error: CNC=CC=C1C([C@H1](CCC2=CC(=C(OC)C(OC)=C12)OC)NCC)=O  
 PUGREST.BadRequest: error:  
CSC=1C(C=C2C(=CC=1)C3=C(OC)C=CC=C3CC[C@@H1]2NCN)COCOC

PUGREST.BadRequest: error:  
C=1SC=2C=1C=C3C(=CC=2)C4=C(OC)C(=CC=C4CC[C@@H1]3NCN)C  
PUGREST.BadRequest: error:  
COC1=CC=2CC[C@@H1](C=3C(C=2C(=C1OC)OC)=CC=C(NC)C(=O)C=3)NC(=O)CNC  
PUGREST.BadRequest: error:  
CSC1=CC=C2C(=CC1=O)[C@H1](CCC3=CC(OC)=C(OC)C(=C23)O)CNC(=O)C  
PUGREST.BadRequest: error:  
COC1=CC=2CC[C@@H1](C3=CC(=O)C(NC)=CC=C3C=2C(OC)=C1OCN)C(=O)C  
PUGREST.BadRequest: error:  
CSC=1C(C=C2C(=CC=1)C3=C(OC)C(=C(OC)C=C3CC[C@@H1]2NCN)O)OCNC  
PUGREST.BadRequest: error:  
CNC=CC=C1C[C@H1](CCC2=CC(=C(OC)C(OC)=C12)OC)N=CC(=O)OC00  
PUGREST.BadRequest: error:  
C1=C2[C@H1](CCC3=C(C(OC)=C(C(=C3)OC)OC)C2=CC=C(C1=O)NC)NC  
PUGREST.BadRequest: error:  
C1SCC(C=C2C(C3=C(C=C(OC)C(OC)=C3OC)CC[C@@H1]2N)=C1)=O  
PUGREST.BadRequest: error:  
CNC=1C(C=C2C(=CC=1)C3=C(OC)C(OC)=C(C=C3CC[C@@H1]2NC(C)=O)O)C=O  
PUGREST.BadRequest: error:  
CSC1=CC=C2C(=CC1=O)[C@H1](CCC3=CC(OC)=C(OC)C(OC)=C23)NCC  
PUGREST.BadRequest: error:  
COC=C1C=2CC[C@H1](NC(C)=O)C3=CC(=O)C(SC)=CC=C3C=2C(O)=C1OC  
PUGREST.BadRequest: error:  
COC=C1CCC2[C@H1](O)CCC3=CC(=C(OC)C(OC)=C3C2=CC1OCN)C(=O)C  
PUGREST.BadRequest: error:  
COC=C1CCC2[C@H1](O)CCC3=CC(=C(OC)C(OC)=C3C2=CC1OCNC)C=O  
PUGREST.BadRequest: error:  
COC=C1CCC[C@H1](O)CCC2=CC(=C(OC)C(OC)=C2C=CC1OC)NC(=O)C  
PUGREST.BadRequest: error:  
CNC=1C(C=C2C(=CC=1)C3=C(OC)C(OC)=CC=C3CC[C@@H1]2NC(C)=O)OC=O  
PUGREST.BadRequest: error:  
C1OC=CC=2CC[C@H1](NC(N)=O)C3=CC(C(=CC=C3C=2C(OC)=C1OC)NC)=O  
PUGREST.BadRequest: error: COC=C1CCC[C@H1](NC(N)=O)C2=CCC(=CC=C2C1C(O)C=O)NC  
PUGREST.BadRequest: error:  
CSC=1CC=CC(=C2C=1)C3=C(OC)C(OC)=C(C=C3CC[C@@H1]2NOCNC)O  
PUGREST.BadRequest: error:  
NN(C[C@H1](OC[C@@H1][C@@H1](CO)O)OS1C2=CCC(NC)=CC=C2C3=C(C=C(C(=C3OC)OC)OC)CC1)O  
PUGREST.BadRequest: error: C=12OC3=CCCC[C@H1](N)CC(C=1C(=C2OC)OC)=CC=C(O)CC3=O  
PUGREST.BadRequest: error:  
CNC=1C(C=CC(=C2C=1)C3=C(OC)C(OC)=CC=C3CC[C@@H1]2NOCs)C=O  
PUGREST.BadRequest: error: CSCCC=C1C(C2=CC=C(OC)C(OC)=C2OC)CC[C@@H1]1N=O  
PUGREST.BadRequest: error:  
CNC=1CC=CC(=C2C=1)C3=C(OC)C(OC)=C(C=C3CC[C@@H1]2NOCs)C=O  
PUGREST.BadRequest: error: COC=C1C2CC[C@H1](N)CCC3=CC(=C(OC)C=C3C2=CC1OCs)C  
PUGREST.BadRequest: error:  
CC(=O)C(S1=2C3)CC(OC)=C(OC)C(C)=C1C3=CC=C(SC)C(C=2)=O  
PUGREST.BadRequest: error:  
C1C(=O)C=CC2=C(SC)C(OC)=C(OC)C(C)=CCC[C@@H1](C2=C1)NC(=O)C



PUGREST.BadRequest: error: C12=C(CC1NC(=O)C=CC(C(SC)=CC2)=O)C(OC)=C(C(OC)=C)OC  
PUGREST.BadRequest: error:  
C1=C(C(OC(=O)C)=C2C(OC)=C1)OCC=3C([C@H1](CC2)NC(=O)C)=CC(=O)C(O)=CC=3  
PUGREST.BadRequest: error:  
CC(=O)OC1=CC=C2C3=C(C(OC)=C(C=C3CC[C@@H1](C2=CC1=O)NC(=O)CO)CO)C  
PUGREST.BadRequest: error:  
C12C(=O)C(=C3C=C1C4=C(CC[C@@H1]3NC(C)=O)C=C(OC)C(=C4OC)OC=C2SC)OC(=O)C  
PUGREST.BadRequest: error:  
C12C(=O)C2=C3C=C1C4=C(CC[C@@H1]3NC(C)=O)C=C(OC)C(OC)=C4OC(OC)=O  
PUGREST.BadRequest: error:  
C12C(=O)C(=CC=C1C3=C(CC[C@@H1]2NC(C)=O)C=C(OC)C(=C3OC)OC(OC)=O)SC  
PUGREST.BadRequest: error:  
CC(=O)OC=1C(=O)C=C2C(=CC=1)C3=C(OC)C(OC)=C(C=C3CC[C@@H1]2NC(C)=O)C(=O)C  
PUGREST.BadRequest: error:  
C12C(=O)C=C3C=C1C4=C(CC[C@@H1]3NC(C)=O)C=C(OC)C(=C4OC(OC)=O)OC=C2  
PUGREST.BadRequest: error:  
C12C(=O)C(=CC=C1C3=C(CC[C@@H1]2NC(C)=O)C=C(OC)C(OC)=C3OC(OC)=O)SC  
PUGREST.BadRequest: error:  
CC(=O)OC1=CC=C2C3=C(C(OC)=C(C=C3CC[C@@H1](C2=CC1=O)NC(=O)C)OC)OC(=O)C  
PUGREST.BadRequest: error:  
C1C(=O)C(=C2C=C1C3=C(CC[C@@H1]2NC(C)=O)C=C(OC)C(OC)=C3OC(OC)=O)SC  
PUGREST.BadRequest: error:  
C=1C(=O)C(OC(=O)CC)=CC=CC2=C(C3=C(OC)C(OC)=C2OC)CC[C@H1](NC(=O)C)C3=1  
PUGREST.BadRequest: error:  
C1C(=O)OC2C=CC=CC(=C2)[C@@H1](NC(=O)C)CCC3=CC(OC)=C(OC)C(=C3)OC=C1  
PUGREST.BadRequest: error:  
C=12C=3C(=CC(=O)C(SC)=CC=3)[C@H1]CCC=1C=C(OC)C(=C2OC)OCNC(C)=O  
PUGREST.BadRequest: error:  
CCC(=O)OC1=CC=C2C3=C(C(OC)=C(C=C3CC[C@@H1](C2=CC1=O)OC(=O)C)OC)OC  
PUGREST.BadRequest: error:  
CCC(=O)N[C@H1]1CCC2=CC(=C(OC)C(OC)=C2C=3C1=CC(=O)C(=CC=3)OC(OC)=O)OC  
PUGREST.BadRequest: error:  
CCC(=O)OCC(C=C1C(=C)C2=C(OC)C(=C(C=C2CC[C@@H1]1N)CC)OO)COC=CO  
PUGREST.BadRequest: error:  
CC(C)C1(OC=C2C3=CC=C(C(C=C3[C@H1](CCC2=CC(=C1OC)OC)NCC)=O)O)OC=O  
PUGREST.BadRequest: error:  
CC(C)C(OC1=CC=C2C3=C(CC[C@@H1](C2=CC1=O)NC(C)=O)C=C(OC)C(OC)=C3OC(O)C=O  
PUGREST.BadRequest: error:  
CC(C)C1(OC=CC2=CC=C(C(C=C2[C@H1](CCC=CC(=C1OC)OC)NCC)=O)O)OC=O  
PUGREST.BadRequest: error:  
CC(C)C(OC1=CC=C2C3=C(CC[C@@H1](C2=CC1=O)NC(C)=O)C=C(OC)C(OC)=C3OC=O)C  
PUGREST.BadRequest: error:  
CC(C)C(=O)OC1=CC=C2C3=C(C(OC)=C(C=C3CC[C@@H1](C2=CC1=O)NC(C)=O)OC)OC(=O)C  
PUGREST.BadRequest: error:  
CC(C)C(OC1=CC=C2C3=C(C=C(OC)C(OC)=C3OC)CC[C@@H1](C2=CC1=O)NC(=O)CC(O)C  
PUGREST.BadRequest: error:  
CC(=O)N[C@H1]CCC1=CC(OC)=C(OC)C(=C1C2=CC=C(SC)C(=O)C=C2)CC=C  
PUGREST.BadRequest: error:

CC(=O)N[C@@H1]1C2=CC(C(SC)=CC=C2C3=C(OC)C(=C(OC)C=C3CC1)OC(=O)C=CC=CC=C)O  
 PUGREST.BadRequest: error:  
C12=C(C(=C(OC)C(OC)=C1)OC(C)=O)CC([C@H1](CC2)NC(C)=O)=CC(C(SC)=CC)=O  
 PUGREST.BadRequest: error:  
CC(=O)OCC1=CN(N=N1)[C@H1]2CCC3=CC(OC)=C(OC)C(OC)=C3C=4C2=CC(=O)C(=CC=4)NCC  
 PUGREST.BadRequest: error:  
C1=C(C2=C(OC)C(OC)=C1OC(=O)CCC)C[C@H1](C3=CC(=O)C(SC)=CC=C32)NC(C)=O  
 PUGREST.BadRequest: error:  
CC(=O)N[C@H1]1CCC2=CC(OC)=C(OC)C(=C2C3=CC=C(C(C=C31)=O)OCC4=CC=CC=C4)OOC  
 PUGREST.BadRequest: error:  
O=C(OC)OC=C(OC)C(=C1C(CC[C@H1](C2=CC(C(=CC=C12)SC)=O)N=C)O)C  
 PUGREST.BadRequest: error:  
O=C(OC1)OC=C2C3=CC=C(C(C=C3[C@H1](CCC2=CC(=C1OC)OC)NCC)=O)OOC  
 PUGREST.BadRequest: error:  
O=C(OC)OCC(=O)C=C1C(C2=C(C(OC)=C(C=C2CC[C@H1]1NC(=O)C)OC)OC)(O)CC  
 PUGREST.BadRequest: error:  
O=C(OC)OC1=C2C3=CC=C(C(C=C3[C@H1](CCC2=CC(OC)=C1O)CNC=O)C)OOC(=O)C  
 PUGREST.BadRequest: error:  
O=C(OC)OC1=CC=C2C3=C(C(OC)=C(C=C3CC[C@H1](C2=CC1=O)OC(=O)C)NC)CC=O  
 PUGREST.BadRequest: error:  
O=C(OC)OC=CC=C1C([C@H1](NC(=O)C)CCC2=CC(=C(OC)C(OC)=C21)O)C=CC=O  
 PUGREST.BadRequest: error:  
O=C(OC)OC=CC=C1C2=C(C(OC)=C(C=C2CC[C@H1](C1=CC=O)NC(=O)C)OC)C(=O)C  
 PUGREST.BadRequest: error:  
O=C(OC)OC1=CC=C2C3=C(C(OC)=C(C=C3CC[C@H1](C2=CC1=O)OC(=O)O)CO)SC  
 PUGREST.BadRequest: error:  
O=C(OC1)OC=C2C3=CC=C(C(C=C3[C@H1](CCC2=CC(=C1OC)OC)NC=O)C)OOC  
 PUGREST.BadRequest: error:  
O=C(OC)OC=1C(C=C2C(=CC=1)C3=C(OC)C(=C(OC)C=C3CC[C@H1]2NC(=O)C)O)C=O  
 PUGREST.BadRequest: error:  
O=C(OC)OCC(C=C1C(C2=C(C(OC)=C2OC)CC[C@H1]1NC(C)=O)=CC)=O  
 PUGREST.BadRequest: error:  
O=C(C)N[C@H1]1CCC2=CC(=C(OC)C(=C2C=3C1=CC(C(=CC=3)OC(=O)OC)=O)CN)C(=O)COCC  
 PUGREST.BadRequest: error:  
O=C(C)N[C@H1]1CC(C2=C(C(=C(OC)C=C2CC1)OC)OC)C=C(SC)C(C)=O  
 PUGREST.BadRequest: error:  
O=C(C(C)C)OC1=C2C3=CC=C(C(C=C3[C@H1](CCC2=CC(OC)=C1O)CNCC)=O)OOC  
 PUGREST.BadRequest: error:  
O=C(C)N[C@H1]1CC2(C3=C(C(=C(OC)C=C3CC1)OC)OC)C=C(OC)C(C2)=O  
 PUGREST.BadRequest: error:  
O=C(C)N[C@H1]1CCC2=CC(=C(OC)C(=C2C=3C1=CC(C(=CC=3)OC)O)COC(=O)OC)NC(=O)C=O  
 PUGREST.BadRequest: error:  
O=C(CC)OC1=C2CC([C@H1](NC(C)=O)CCC2=CC(=C1OC)OC)=CC(C(=CC)SC)=O  
 PUGREST.BadRequest: error:  
O=C(C)N[C@H1]1CCC2=CC(=C(OC)C(=C2C=3C1=CC(C(=CC=3)OC(OC)=O)=O)CC)OOC  
 PUGREST.BadRequest: error:  
O=C(C)N[C@H1]1CCC2=CC(=C(OC)C(=C2C=3C1=CC(C(=CC=3)OC)O)C0OC0C)C=O  
 PUGREST.BadRequest: error:

CC(=O)N[C@H]1C1CC2=CC(OC)=C(OC)C(OC)=C2C3=CC=C(C(=O)C=C31)OC  
 PUGREST.BadRequest: error:  
CC(=O)C1=CC=C(SC)C(C=C1[C@H]1CCC=CC(OC)=COC)NC(=O)CSC  
 PUGREST.BadRequest: error:  
C=1C(=O)C2=C(C3=CC=C(SC)C(C=C3[C@H]1)(CC2)NC(=O)COC)C(OC)C=1  
 PUGREST.BadRequest: error:  
CC(=O)N[C@H]1C1CC2=CC(OC)=C(OC)C(OC)=C2C3=CC=C(C(=O)C=C31)O  
 PUGREST.BadRequest: error:  
C1C(=O)C=C(C2=CC=C(SC)C(C=C2[C@H]1)(NC(C)=O)C)COC)C(OC)C(=C1)SC  
 PUGREST.BadRequest: error: CC(=O)C=C(C1=CC2=C(SC)C(C=C1[C@H]1)(NC(C)=O)C)C)OC2OC  
 PUGREST.BadRequest: error: C12=C(C3=CC=C(SC)C(C=C3[C@@H]1)(N)CC1)=CCOC)C2OC=C  
 PUGREST.BadRequest: error:  
C=12C(=CC(C(SC)=CC=1)=O)[C@H]1)(CCC3=CC(OC)=C(OC)C(=C32)N)C  
 PUGREST.BadRequest: error:  
C=1C(=O)C(=CC=C2C3=C(OC)C(OC)=CC=C3CC[C@@H]1)(C2=1)NC(=O)COC  
 PUGREST.BadRequest: error:  
C=1C(=O)C(OC(=O)C)=CC=C2C3=C(OC)C(=C(OC)C=C3CC[C@@H]1)(C2=1)OCNC(=O)C  
 PUGREST.BadRequest: error:  
C=12C(=O)C(=CC=C3C=1[C@H]1)(CCC4=CC(OC)=C(OC)C(OC)=C34)NCC)OC2  
 PUGREST.BadRequest: error:  
CC(=O)OC1=C2C3=CC=C(SC)C(=O)C=C3[C@H]1)(CCC2=C(OC)C=C1)OCNC(C)=O  
 PUGREST.BadRequest: error:  
C=12C(=O)C(=CC=C3C=1[C@H]1)(CCC4=CC(OC)=C(OC)C(OC)=C34)NC(C)=O)C2  
 PUGREST.BadRequest: error:  
C1=C(C(O)=CC=C1CC([C@@H]1)(NC(=O)C)CC)=CCC(=CC)SC)OOC(=O)CCOC  
 PUGREST.BadRequest: error:  
CCC(=O)OC=C1C2=CC=C(SC)C(=O)C=C2[C@H]1)(CCC1=C(OC)C=C)OCOC(=O)OC  
 PUGREST.BadRequest: error:  
C=1C=C(OC(=O)OC)C(C=C2C=1C3=C(OC)C(=C(OC)C=C3CC[C@@H]1)2NC)C)C=O  
 PUGREST.BadRequest: error:  
CCC(=O)OC=CC=C1C([C@@H]1)(NC(C)=O)CCC2=CC(OC)=CC(OC)=C21)OC=CC=O  
 PUGREST.BadRequest: error:  
CCC(=O)OC=C1C2=CC=C(SC)C(=O)C=C2[C@H]1)(CCC1=C(OC)C=C)OCOCNC(=O)C  
 PUGREST.BadRequest: error:  
C=1C=C(OC(=O)OC)C2(C=CC=1C3=C(OC)C(=C(C(OC)=C3CC[C@@H]1)2NC)C)OCOC=O  
 PUGREST.BadRequest: error:  
C12C=C(C3=CC=C(SC)C(=O)C=C3[C@@H]1)(NC(=O)C)C1)C(=C(OC)C(OC)=C2)OC  
 PUGREST.BadRequest: error:  
CCC(=O)N[C@H]1CCC2=C(C(OC)=C(C(OC)=C2)OC)C=3C1=CC(C(SC)=CC=3)=O  
 PUGREST.BadRequest: error:  
CCC(=O)OC=C1C2=CC=C(SC)C(=O)C=C2[C@@H]1)(NC(=O)C)CCC1=CC(OC)=COC  
 PUGREST.BadRequest: error: C1C=C1C2=CC=C(SC)C(=O)C=C2[C@H]1  
 PUGREST.BadRequest: error:  
C=1C=C(OC(=O)OC)C(C=C2C=1C3=C(OC)C(=C(C=C3CC[C@@H]1)2NC(C)=O)OC)O)C=O  
 PUGREST.BadRequest: error:  
CCC(=O)N[C@H]1CCC2=CC(OC)=C(C(OC)=C2C=3C1=CC(=O)C(=CC=3)SC)OC(=O)OCC  
 PUGREST.BadRequest: error:  
C12C=C(CC[C@H]1)(NC(=O)C)C1=CC(C(=CC)SC)=O)C=C(OC)C(OC)=C2OC

PUGREST.BadRequest: error:  
CC=1C(=CC(C(=CC=1)SC)=O)[C@H1](CCC2=CC(OC)=C(OC)C(=C2)OC)NC(=O)C  
PUGREST.BadRequest: error:  
CC(C)COCN[C@H1]1CCC2=CC(OC)=C(C(=C2C=3C1=CC(C(=CC=3)SC)=O)OC)OC(=O)C  
PUGREST.BadRequest: error:  
CC(C)CCN[C@H1]1CCC2=C(C3=CC=C(SC)C(C=C31)=O)C(=C(C(OC)=C2)OC)OCCC  
PUGREST.BadRequest: error:  
CC(C)CCN[C@H1]1CCC2=C(C3=CC=C(SC)C(C=C31)=O)C(=C(C(OC)=C2)OC)OC(=O)C  
PUGREST.BadRequest: error:  
CC(C)C(OC1=C2C3=CC=C(SC)C(=O)C=C3[C@H1](CCC2=CC(OC)=C1OC)NC=O)C=O  
PUGREST.BadRequest: error:  
C1=C(OC)C(=C(OC)C2=C1CC[C@H1](NC(=O)C)C=3C2=CC=C(OC(=O)OC)C(C=3)=O)C  
PUGREST.BadRequest: error:  
CC(C)CCN[C@H1]1CCC2=C(C3=CC=C(SC)C(C=C13)=O)C(=C(C(OC)=C2)OC)OCCC  
PUGREST.BadRequest: error:  
CC(=O)N1[C@H1]CCC2=CC(OC)=C(OC)C(OC(=O)C)=C2C=3C1=CC(C(=CC=3)SC=O)CC=O  
PUGREST.BadRequest: error:  
C=1C(=CC(C(SC)=CC=1)=O)[C@H1](CCC=CC(OC(=O)C(C)C=COC)C(=C)OCNC=O)CSC  
PUGREST.BadRequest: error:  
C12=C(C=C(OC)C(OC)=C1OC(=O)C3=CC)CC=C3C=CC=C(CC2O[C@@H1]NC(C)=O)C  
PUGREST.BadRequest: error:  
O=C(OC1)OC=CC=C2C3=C(OC)C(=C(OC)C=C3CC[C@@H1](NC(C)=O)C2=CC1)OO  
PUGREST.BadRequest: error:  
O=C(OC)OC1=CC=C2C3=C(OC)C(=C(OC)C=C3CC[C@@H1](C2=CC1=O)NC=O)COC  
PUGREST.BadRequest: error:  
O=C(OC1)OC=CC=C2C3=C(OC)C(=C(OC)C=C3CC[C@H1](NC(=O)C)C2=CC1)OO  
PUGREST.BadRequest: error:  
O=C(OC)OC1=CC=C2C3=C(OC)C(=C(OC)C=C3CC[C@@H1](C2=CC1=O)NCC)OOC  
PUGREST.BadRequest: error:  
O=C(CC1)OC=CC=C2C3=C(OC)C(=C(OC)C=C3CC[C@H1](NC(=O)C)C2=CC1)OOC  
PUGREST.BadRequest: error:  
O=C(C)N[C@H1]1CCC2=CC(OC)=C(C(OC)=C2C3=CC=C(C(=O)C=C13)OCCC)OOC  
PUGREST.BadRequest: error:  
O=C(C)N[C@H1]C1=CC(C(OC(OCC)=O)=CC=C1C2=C(OC)C=C(OC)C=C2CC)OC=O  
PUGREST.BadRequest: error:  
O=C(C)N[C@H1]CC1C2=CC(OC)=CC(OC)=C2C=CC=C(OC(=O)OCC)C(=O)C=C1  
PUGREST.BadRequest: error:  
O=C(NC)NCC=CN(C=1OCC)CN(OCCC)CC=CC2=C(OC)C(=C(OC)C=C2CC[C@H1](NC(=O)C)OC=1)C=O  
PUGREST.BadRequest: error:  
O=C(N(C)C)NC1=CC=C2C3=C(OC)C(=C(OC)C=C3CC[C@@H1](C2=CC1=O)NCC)OOC  
PUGREST.BadRequest: error:  
O=C(C)N[C@H1]1CCC=C(C2=CC=C(SC)C(C=C12)=O)C(OC(CC)=O)=C(C(OC)=C)OC  
PUGREST.BadRequest: error:  
O=C(N)N[C@H1]1CCC2=CC(OC)=C(C(OC)=C2C=3C1=CC(C(OC(=O)C)=CC=3)=O)OC  
PUGREST.BadRequest: error:  
O=C(C)N[C@H1]1CCC2=CC(OC)=C(C(OC)=C2C3=CC=C(C(=O)C=C31)OC(=O)O)CCOC  
PUGREST.BadRequest: error:  
O=C(C)N[C@H1]1CCC2=CC(OC)=C(C(OC)=C2C=3C1=CC(C(OC(=O)CC)=CC=3)O)C=O

PUGREST.BadRequest: error:  
O=C(N)N[C@H1]1CCC2=CC(OC)=C(C(OC)=C2C3=CC=C(C(C=C31)=O)O)C(=O)OCNC

PUGREST.BadRequest: error:  
CC(=O)N1[C@H1]CCC2=CC(OC)=C(OC)C(OC)=C2C3=CC=C(NC)C(C=C31)=O

PUGREST.BadRequest: error:  
C=1C(=CC=C(C2=O)OCC[C@H1]CCC3=CC(OC)=C(OC)C(OC)=C3C2)CC=1SC

PUGREST.BadRequest: error:  
C1C(=O)OCC2=CC=CC3=C(OC)C(OC)=C(OC)C=C3CC[C@H1](NC(C)=O)C2=CC1=O

PUGREST.BadRequest: error:  
CC(=O)OCC=CC=C1C2=C(OC)C(OC)=C(OC)C=C2CC[C@H1](NC(C)=O)C1=CSC

PUGREST.BadRequest: error:  
CC(=O)N1[C@@H1]C2=CC(C(NC)=CC=C2C3=C(C(OC)=C(OC)C=C3CC1)OC)NC=O

PUGREST.BadRequest: error:  
CC(=O)OC=CC=C1C2=C(OC)C(OC)=C(OC)C=C2CC[C@H1](NC(C)=O)C1=CCSC=O

PUGREST.BadRequest: error:  
CC(=O)N[C@H1]C1CC2=CC(OC)=C(OC)C(OC)=C2C3=CC=C(SC)C(C=C31)=O

PUGREST.BadRequest: error:  
C12=C(C=3C([C@H1])(C4C1)N=C(C1)C=C4CCC(SC)=CC=3)OC=C2OCNC

PUGREST.BadRequest: error: C10C=C2C3=CC=C(NC)C(=O)C=C3[C@H1](CCC2=CC(OC)=C10C)N

PUGREST.BadRequest: error: CNCCC=C1C(C2=C(OC)C(OC)=CC=C2CC[C@@H1]1NOC)=O

PUGREST.BadRequest: error: C10C=CC2=C(CC(O)CC1=CC=C3C(OC)=C(OC)C)P=C3C2OCSC

PUGREST.BadRequest: error: CSCC=CC=CC1=C(OC)C=C(C=C1CC[C@@H1]NC(N)=NOCOC)O

PUGREST.BadRequest: error: C10C=C2CC([C@@H1](N)CCC2=CC(OC)=C10C=CC)(C(=CC)SC)O

PUGREST.BadRequest: error:  
COC1=C2C3=CC=C(NC)C(=O)C=C3[C@H1](CCC2=CC(OC)=C10C)NO

PUGREST.BadRequest: error:  
C=C1CC2[C@H1](CCC3=C(C(OC)=C(OC)C(=C3)OC)C2)CC=C1N=[N+1]=[N-1]

PUGREST.BadRequest: error:  
C=1NCC(C=C2C(C3=C(OC)C=C(C=C3CC[C@@H1]2N=[N+1]=[N-1])OC)OC=C)C=1O

PUGREST.BadRequest: error: COC=C1C2=CC=C(NC)C(=O)C=C2[C@H1](CCC1C=COC)N3N=NC=C3

PUGREST.BadRequest: error:  
COC=C1C2=CC=C(SC)C(=O)C=C2[C@@H1](NCCCCCCCC)CCC1=CC(=COC)SC

PUGREST.BadRequest: error:  
COC=C1C2=CC=C(NC)C(=O)C=C2[C@@H1](N=[N+1]=[N-1])CCC1=CC(=COC)OC

PUGREST.BadRequest: error:  
C10C=CC2=C(C3=C(OC)C(OC)=CC=C3CC[C@@H1]2N=[N+1]=[N-1])CC=C1NC

PUGREST.BadRequest: error:  
C=CCC1[C@H1](CC=[N+1]C2=C(C(OC)=C(OC)C=C2C1O)C=O)[N-1]CCC

PUGREST.BadRequest: error:  
C=12[C@@H1](C=CC(=O)C(C)=CC=1C3=C(CC2)C=C(OC)C(OC)=C3OCNC)CNC=C

PUGREST.BadRequest: error:  
C1[C@@H1](C2=CC(=O)C(SC)=CC=C2C3=C(C=C(OC)C(=C3OC)OC)C1N)CCNC

PUGREST.BadRequest: error:  
COC1=C(OC)C(OC)=C2CCC[C@H1](N3C=CN=N3)C4=CC(=O)C(=CC=C4C21)NC

PUGREST.BadRequest: error:  
C12=CC(C(=CC=C1C3=C(C=C(OC)C(OC)=C3OC)CC[C@@H1]2NCCO)C)NC

PUGREST.BadRequest: error:  
C1[C@@H1](C2=CC(=O)C(NC)=CC=C2C3=C(C=C(OC)C(=C3OC)OC)C1)NCCSC

PUGREST.BadRequest: error:  
N(C1=CC=C2C3=C(CC[C@@H1])(C2=CC1=O)N4C=CN=N4)C=C(OC)C(OC)=C3O)CC  
PUGREST.BadRequest: error:  
C=1=C2C([C@H1])(CCC3=CC(=C(OC)C(=C32)OC)OC)NCCCCC)CC=CC(C=1SC)=O  
PUGREST.BadRequest: error:  
N1C(COC(=O)OC=CN1[C@@H1]2)C3=CC(=O)C(NC)=CC=C3C4=C(CC2)C=C(C(OC)=C4OC)OC  
PUGREST.BadRequest: error:  
N1C(COC(=O)OC=CN1[C@@H1]2)C3=CC(=O)C(NC)=CC=C3C4=C(CC2)C=C(C(=C4OC)OC)OC  
PUGREST.BadRequest: error:  
CNC(C(C)O)N[C@@H1]1CC(C2=C(C(=C(OC)C=C2CC1)OC)OC)=CC=C(NC)C(C)=O  
PUGREST.BadRequest: error:  
C=C1C([C@H1])(CCC2=CC(=C(OC)C(=C21)OC)OC)NCCCCC)CC=CC(C(=C)SC)=O  
PUGREST.BadRequest: error:  
COC1=C(OC)C(=CC=2CC[C@@H1])(C3=CC(C(=CC=C3C=21)NC)=O)N4C=C(N=N4)CCC)NCOC  
PUGREST.BadRequest: error:  
CNC(C(C)O)ON(C=1C(C=C2C(=CC=1)C3=C(OC)C=C(C=C3CC[C@@H1]2NCC)CC)O)COC=O  
PUGREST.BadRequest: error:  
C1=C2C(C3=C(C=C(OC)C(=C3OC)OC)CC[C@@H1]2N4C=C(N=N4)CCCC=C)C=C(NC)C1=O  
PUGREST.BadRequest: error:  
CNC(C(C)O)N([C@H1]1CCC2=CC(=C(OC)C(OC)=C2C=3C1=CC(=O)C(=CC=3)NC)OCC)C  
PUGREST.BadRequest: error:  
CNC(C(C)O)N[C@@H1]1C=2C(C3=C(C=C(OC)C(OC)=C3OC)CC1)=CC=C(C(=O)C=2)NC  
PUGREST.BadRequest: error:  
C=C1C(C2=C(C=C(OC)C(=C2OC)OC)CC[C@@H1]1NCCCCCCCCCCCC)=CC=C(SC)C=O  
PUGREST.BadRequest: error:  
CNC(=S)N[C@@H1]1C2=CC(=O)C(NC)=CC=C2C3=C(OC)C(=C(C=C3CC1)OC)OCO  
PUGREST.BadRequest: error:  
C1=2C3=C(C(=C(C=C3CC[C@@H1])(NCCCCCCCC)C1=CCC(=CC=2)NC)OO)CO)COC  
PUGREST.BadRequest: error:  
C12=CC(C(NC)=CC=C1C3=C(C=C(C(OC)=C3OC)OC)CC[C@@H1]2N4C=C(N=N4)COO)NC  
PUGREST.BadRequest: error:  
N([C@H1]1CCC2=C(C3=CC=C(C(C=C13)=O)NC)C(OC)=C(OC)C(OC)=C2)N=N  
PUGREST.BadRequest: error:  
COC=C(OC)C(OC)=C1CCC[C@@H1](C2=CC(=O)C(NC)=CC=C12)NCCCCC  
PUGREST.BadRequest: error:  
C=C1C([C@H1])(CCC2=CC(=C(OC)C(=C21)OC)OC)N3N=NC=C3)CC1  
PUGREST.BadRequest: error:  
COC=C(OC)C(OC)=C1CCC[C@@H1](C2=CC(=O)C(SC)=CC=C12)NCCCCCCCC  
PUGREST.BadRequest: error:  
COC=C(OC)C(OC)=C1CCC[C@@H1](C2=CC(=O)C(NC)=CC=C12)NCCCCCCCC  
PUGREST.BadRequest: error:  
C12C3=CC(OC)=C(OC)C=C3CC([C@H1]1NCCCCCCCC)=CC(=C2OC)OC  
PUGREST.BadRequest: error:  
C12=CC(C(NC)=CC=C1C3=C(C=C(C(OC)=C3OC)OC)CC[C@@H1]2NCCCCCCCCCF)=O  
PUGREST.BadRequest: error:  
C12=CC(C(NC)=CC=C1C3=C(C=C(C(OC)=C3OC)OC)CC[C@@H1]2N4C=C(N=N4)CC1)NC  
PUGREST.BadRequest: error:  
C1=C2C(C3=CC=C(C(=O)C=C3[C@H1](CC2)NCCC4=CC=CC=C4)OS)CC(OC)=C(OC)C(=C1)OC

PUGREST.BadRequest: error:  
 COC1=C(OC)C(OC)=CC=2CC[C@@H1](C3=CC(=O)C(NC)=CC=C3C=21)NCCC4=CC=CC=C4NC  
 PUGREST.BadRequest: error:  
 C1[C@@H1](C2=CC(=O)C(SC)=CC=C2C3=C(C(=C(OC)C=C3C1)OC)OC)NCCC=CC=CC  
 PUGREST.BadRequest: error:  
 CNC(C(C)C)N[C@@H1]1C2=CC(=O)C(NC)=CC=C2C3=C(C(=C(OC)C=C3CC1)OC)OC  
 PUGREST.BadRequest: error:  
 C=C1C([C@H1](CCC2=CC(=C(OC)C(=C21)OC)OC)NCCCCC=C)C(C(SC)=C)=O  
 PUGREST.BadRequest: error:  
 C=C1C([C@H1](CCC2=CC(=C(OC)C(=C21)OC)OC)NCCCCC)C=CC(C(SC)=C)=O  
 PUGREST.BadRequest: error:  
 COC1=C(OC)C(OC)=CC=2CC[C@@H1](C3=CC(=O)C(NC)=CC=C3C=21)N4C=C(N=N4)CCONC  
 PUGREST.BadRequest: error:  
 C12=CC(C(NC)=CC=C1C3=C(C=C(C(OC)=C3OC)OC)CC[C@@H1]2N4C=C(N=N4)CCC)C1  
 PUGREST.BadRequest: error:  
 CN(C(=S)N[C@@H1]1C2=CC(=O)C(NC)=CC=C2C3=C(C(=C(OC)C=C3CC1)OC)OC)CC#N  
 PUGREST.BadRequest: error:  
 C1OC=C(OC)C(OC)=C2C1CC[C@@H1](C3=CC(=O)C(NC)=CC=C23)NCCCCCCCC=C  
 PUGREST.BadRequest: error:  
 C[C@H1](OCCC)CCC1=C(OC)C(OC)=C(OC)C=C1CC=CC=CC(=O)CSCN  
 PUGREST.BadRequest: error:  
 CC(C)(C)OC1=CN(N=N1)[C@H1]C2CC3=CC(OC)=C(OC)C(OC)=C3C4=CC=C(NC)C(=O)C=C42  
 PUGREST.BadRequest: error: C=C(OC)C1=C(OC)C=2C3=CC=C(SC)CC=C3[C@H1](CCC1=2)C=O  
 PUGREST.BadRequest: error:  
 CC(C)CCCCCN[C@@H1]1C2=CC(C(SC)=CC=C2C3=C(C(OC)=C(OC)C=C3CC1)OC)=O  
 PUGREST.BadRequest: error:  
 CC(C)(C)C(=O)N[C@@H1]1C=2C(C3=C(C(OC)=C(OC)C=C3CC1)OC)=CC=C(NC)C(=O)C=2  
 PUGREST.BadRequest: error:  
 C1=C(OC)C(OC=2)=C(OC)C3CC([C@H1](CCC3=C1)NC(C)=O)SC=CC=20SC  
 PUGREST.BadRequest: error:  
 C=CCOCC(C=C1[C@H1](CCC2=CC(OC)=C(OC)C(OC)=C2C1=CCN)C(=O)C=O)SC=O  
 PUGREST.BadRequest: error:  
 OC(CCC(C)C)OCC1=CN(N=N1)[C@H1]CCC2=CC(OC)=C(OC)C(OC)=C2C3=CC=C(C(=O)C=C3)NC  
 PUGREST.BadRequest: error:  
 O=C(NCC1=CC=CC=C1C1)N[C@H1]2CCC3=C(C(OC)=C(OC)C(OC)=C3)C4=CC=C(NC)C(=O)C=C24  
 PUGREST.BadRequest: error:  
 N([C@H1]1CCC2=C(C(OC)=C(OC)C(OC)=C2)C3=CC=C(NC)C(C=C13)=O)C(0)=O  
 PUGREST.BadRequest: error:  
 O=CC=CCC=CN(C(N[C@H1]1CCC2=CC(OC)=C(OC)C(OC)=C2C3=CC=C(NC)C(=O)C=C13)=O  
 PUGREST.BadRequest: error:  
 C12[C@H1]CC(C3=C(OC)C(OC)=C(OC)C=C3C1=CC=COC(OCC)=O)=C2SC=CC=O  
 PUGREST.BadRequest: error:  
 OC(CCC1(C)C)OC=C(C(OC)=C2CCC[C@H1](NC(C)=O)C3=CCC(SC)=CC=C3C21)O  
 PUGREST.BadRequest: error:  
 OC(CCC1(C)C)OC=C(C(OC=2)=CCCC[C@H1](NC(C)=O)C3=CCC(SC)=CC=C3C=21)O  
 PUGREST.BadRequest: error:  
 O=C(C(=O)OCC)C1OC=CC=CC2=C(OC)C(OC)=C(OC)C=C2CC[C@H1](NC(=O)C)C=CC1=O  
 PUGREST.BadRequest: error:

C=CCC(=O)OCCC=C1[C@H1](CCC2=C(C(OC)=C(OC)C(OC)=C2)C1=C)N=O  
 PUGREST.BadRequest: error:  
C12[C@H1]CC(C3=C(OC)C(OC)=C(OC)C=C3C1=CC=C(SC)C)(C=C2)ONC(=O)C  
 PUGREST.BadRequest: error:  
C=C1C(C2=CC=C(C(=O)C=C2[C@@H1](NCCCCCCCCCCCC)CC1)COC)C(OC)=COCOC  
 PUGREST.BadRequest: error:  
C=1N([C@H1]2CCC3=C(C4=CC=C(C(C=C24)=O)NC)C(OC)=C(OC)C(=C3)OC)N=NC=1C  
 PUGREST.BadRequest: error:  
C1=C2C(C3=CC=C(C(=O)C=C3[C@H1](CC2)N4C=C(N=N4)CC(C1)C1)ONC)C(OC)=C(OC)C(=C1)OC  
 PUGREST.BadRequest: error:  
C1=C2C(C3=CC=C(C(=O)C=C3[C@H1](CC2)N4C=C(N=N4)C=CC=CC=N)C=C)OCNC(OC)=C1OC  
 PUGREST.BadRequest: error:  
C=1N([C@H1]2CCC3=C(C(=C(OC)C(OC)=C3)OC)C=4C2=CC(C(=CC=4)NC)=O)N=NC=1C  
 PUGREST.BadRequest: error:  
C=C1C(C2=CC=C(C(=O)C=C2[C@H1](CC1)N3C=C(N=N3)C=CC=CC=N)C=C)OCNCOCOC  
 PUGREST.BadRequest: error:  
C1C2=CC(OC)=C(OC)C(=C2CC([C@H1](C1)NC/C=C/C3=CC=CC=C3)=CC(=O)C(=CC)SCOC  
 PUGREST.BadRequest: error:  
C1=C2C(C3=CC=CC(=O)C=C3[C@H1](CC2)N4C=C(N=N4)C=CC=CC=C(OC)C(OC)=C1OCNC  
 PUGREST.BadRequest: error:  
C=CC=CC(=O)OCCC=C1[C@H1](CCC2=CC(OC)=C(OC)C(OC)=C2C1=CN)OSCC  
 PUGREST.BadRequest: error:  
N1=CC=C(C=C1)C(OC=CC=C2C3=C(OC)C(OC)=C(OC)C=C3CC[C@@H1](C2=CC=O)NC(=O)CSC)=O  
 PUGREST.BadRequest: error:  
C=[C@H1]C1=CCC(OC(C2=CC=CC=C2)=O)=CC=C1C3=C(OC)C(OC)=C(OC)C=C3CC  
 PUGREST.BadRequest: error:  
OC1=C(C=CC=C1)C=2N=NN(C=2)[C@H1]C3CC4=CC(OC)=C(OC)C(OC)=C4C5=CC=C(NC)C(=O)C=C53  
 PUGREST.BadRequest: error:  
C12=CC=C(S1=C3)C(=O)C=C2[C@H1](CCC=CC(OC)=C(OC)C(OC)=C3)NC(C)=O  
 PUGREST.BadRequest: error:  
OC=C(SC)C(C(OC=1)=CCC2([C@H1](NC(C)C)C=CCC2=CC=C=1)NC=O)NCOC  
 PUGREST.BadRequest: error:  
OC1=C(C=CC=C1)C=2N=NN(C=2)[C@H1]CCC3=CC(OC)=C(OC)C(OC)=C3C4=CC=C(NC)C(=O)C=C4  
 PUGREST.BadRequest: error:  
CNCC(O)(C1OC=CC=C1CN[C@@H1]2C3=C)C(C(NC)=CC=C3C4=C(C(OC)=C(OC)C=C4CC2)OC)=O  
 PUGREST.BadRequest: error:  
C=CC1=C(COC2=CC(CC[C@H1](NC(C)=O)C3=CC(C(SC)=CC=C32)=C)C(OC)=C1OOC)OC  
 PUGREST.BadRequest: error:  
C=CC=CCOC=CC=C1C([C@H1](CCC2=CC(OC)=C(OC)C(OC)=C21)NC(=O)C)=O  
 PUGREST.BadRequest: error:  
C1[C@@H1](C2=CC(=O)C(NC)=CC=C2C3=C(C(=C(OC)C=C3C1)OC)OC)N4C=C(N=N4)COC  
 PUGREST.BadRequest: error:  
C=1N([C@H1]2CCC3=C(C(=C(OC)C(OC)=C3)OC)C=4C2=CC(=O)C(=CC=4)NC)N=NC=1C  
 PUGREST.BadRequest: error:  
NC(C1OC(=O)OC=CN1[C@@H1]2)C3=CC(C(=CC=C3C4=C(CC2)C=C(C(OC)=C4OC)OC)NC)=O  
 PUGREST.BadRequest: error:  
C=C1C(C2=CC=C(C(=O)C=C2[C@H1](CC1)N3C=C(N=N3)COCC4=CC=CC=C4)COC)C(OC)=COCNC  
 PUGREST.BadRequest: error:



C1=CC(C2=CC=C(C(=O)C=C2[C@@H1](N3C=C(N=N3)C4=NC=CC=C4)C1N)C=C)(OC)C(OC)=COC  
 PUGREST.BadRequest: error:  
 C1=C2C(C3=CC=C(C(C=C3[C@H1](CC2)N4C=C(N=N4)C5=CC=CC=N5)N)C=C)(C(=C1OC)OC)OC  
 PUGREST.BadRequest: error:  
 C=1N([C@H1]2CCC=C(C3=CC=C(C(C=C23)=O)NC)C(OC)=C(OC)C(=C)OC)N=NC=1C(=O)OC  
 PUGREST.BadRequest: error:  
 O1CC=CC=C1CN[C@H1]2CCC3=CC(OC)=C(OC)C(OC)=C3C4=CC=C(NC)C(C=C24)=O  
 PUGREST.BadRequest: error:  
 O=C(OC)CN(OC)C(CN[C@@H1]1C2=CCC(NC)=CC3=C2C=C(CC1)C=C(OC)C(=C3OC)N)C=O  
 PUGREST.BadRequest: error:  
 O1CC=C2C=C1C3=C(OC)C(OC)=C(OC)C=C3CC[C@H1](CCCC=C2O)CN=CCSC  
 PUGREST.BadRequest: error: OC=CC=CC1=C(C=C(OC)C(OC)=C1OC(OC)=O)NC(C)=O  
 PUGREST.BadRequest: error:  
 O=C(C(C)C=1)OCCC=C2[C@H1](CCC3=CC(OC)=C(OC)C(OC)=C3C2=CC=1N)ONC  
 PUGREST.BadRequest: error:  
 O=C(OC(C)(C)C)N[C@H1]1CCC2=C(C(OC)=C(OC)C(OC)=C2)C3=CC=C(NC)C(=O)C=C13  
 PUGREST.BadRequest: error:  
 O=C(C(C)C=1)OCCC=C2[C@H1]CCC3=CC(OC)=C(OC)C(OC)=C3C2=CC=1N  
 PUGREST.BadRequest: error:  
 O=C(OC)CN(OC)C[C@@H1]1C2=CC(C(NC)=CC=C2C3=C(C(OC)=C(OC)C=C3CC1)OC)=O  
 PUGREST.BadRequest: error:  
 O=C(C)OC1=CN(N=N1)[C@H1]2CCC3=CC(OC)=C(OC)C(OC)=C3C4=CC=C(NC)C(=O)C=C24  
 PUGREST.BadRequest: error:  
 O=C(O)C=C(OC)CC=C1C(C2=C(OC)C(OC)=C(OC)C=C2CC[C@H1]1N=CCS)C=O  
 PUGREST.BadRequest: error:  
 O=C(C)N[C@@H1]1C2=CCC(SC)=CC=C2C3=C(C(OC)=C(OC)C=C3CC1)OCSC=O  
 PUGREST.BadRequest: error:  
 O=C(C)N[C@@H1]1C2=CCC(SC)=CC=C2C3=C(C(OC)=C(OC)C=C3CC1)OCSCOC=O  
 PUGREST.BadRequest: error:  
 O=C(O)C=C(C(OC1C)=O)[C@H1]CCC2=CC(OC)=C(OC)C(OC)=C2C3=CC=C(SC)C(=O)C=C31  
 PUGREST.BadRequest: error:  
 O=C(C)N[C@@H1]1C2=CCC(SC)=CC=C2C3=C(C(OC)=C(OC)C=C3CC1)OCOC=O  
 PUGREST.BadRequest: error:  
 O=C(OC)CN(CCC)C[C@H1]C1CC2=CC(OC)=C(OC)C(OC)=C2C3=CC=C(SC)C(=O)C=C31  
 PUGREST.BadRequest: error:  
 O=C(C(C)C=1)OCCC=C2[C@H1](CCC3=CC(OC)=C(OC)C(OC)=C3C2=CC=1)NSC=O  
 PUGREST.BadRequest: error:  
 C1=C2CC(OC(C3=CC=CC=C3)=O)=CC=C1C4=C(OC)C(OC)=C(OC)C=C4CC[C@H1](NC(=O)C)C2=O  
 PUGREST.BadRequest: error:  
 C1=CCC(OC(C2=CC=CC=C2)=O)=CC=C1C3=C(OC)C(OC)=C(OC)C=C3CC[C@H1](NC(=O)C)C=O  
 PUGREST.BadRequest: error:  
 C1N([C@@H1]2C3=CCC(SC)=CC=C3C4=C(OC)C(OC)=C(C=C4CC2)OCN)C(C(O)=O)=C1O  
 PUGREST.BadRequest: error:  
 C1=CC(C=C(C1(OC(C)=C2)OC(=O)CCC=C3N=C4CNC)CC=C3C=2C(OC)=COC)C=C4NC=O  
 PUGREST.BadRequest: error:  
 C1N([C@@H1]2C3=CCC(SC)=CC=C3C4=C(OC)C(OC)=C(C=C4CC2)OC=O)N(C(C)C)OC1  
 PUGREST.BadRequest: error:  
 C1[C@@H1](C2=CCC(SC)=CC=C2C3=C(OC)C(OC)=C(C=C3C1)OC=O)NC(C(=O)O)=CNC

PUGREST.BadRequest: error:  
N1([C@@H1]CCC1=C2C=C(CNC)CC=C2C3=C(OC)C(OC)=C(OC)C=C3C)NC(C1)=O  
PUGREST.BadRequest: error: OC(OC(C)CC12)=C(C(OCC)=O)N=NN1[C@H1]3CCC4=CC(OC)=C(O  
C)C(OC)=C4C=CC=C(NC)C(=O)C=C32  
PUGREST.BadRequest: error:  
C=C1C(C2=C(OC)C(OC)=C(OC)C=C2CC[C@@H1]1NC(C(O)=O)=C(NCO)OC=CC=CC(=O)C)SCNC  
PUGREST.BadRequest: error: O=C(C(C1)C1)NC(=O)N[C@H1]1CCC2=C(C(OC)=C(OC)C(OC)=C2  
)C3=CC=C(C(C=C31)=O)NCN(O)CCC=O  
PUGREST.BadRequest: error: O=C(C(C1)C1)NC(=O)N[C@H1]1CCC2=C(C(OC)=C(OC)C(OC)=C2  
)C3=CC=C(C(C=C31)=O)NCC4=CC=CC=C4  
PUGREST.BadRequest: error:  
O=C(C(C1)C1)NCC1=CN(N=N1)[C@H1]2CCC3=CC(OC)=C(OC)C(OC)=C3C4=CC=C(C(=O)C=C24)NCCO  
PUGREST.BadRequest: error:  
O=C(OCCC)OCC1=CN(N=N1)[C@H1]2CCC3=CC(OC)=C(OC)C(OC)=C3C4=CC=C(C(=O)C=C24)NCCO  
PUGREST.BadRequest: error:  
O(C=CC=CC1=C2C(OC)=C(OC)C=C1CC[C@H1](NC(N(CCO)CCO)=S)C2=CCCN)ONCC  
PUGREST.BadRequest: error: O=C(OCCC)OCC1=CN(N=N1)[C@H1]2CCC3=CC(OC)=C(OC)C(OC)=  
C3C4=CC=C(C(=O)C=C42)NCC(=O)C  
PUGREST.BadRequest: error: O=C(OCC=C)NCC1=CN(N=N1)[C@H1]2CCC3=CC(OC)=C(OC)C(OC)  
=C3C4=CC=C(C(=O)C=C24)NCC(=O)C  
PUGREST.BadRequest: error: O=C(C(C1)C1)NCC1=CN(N=N1)[C@H1]2CCC3=CC(OC)=C(OC)C(O  
C)=C3C4=CC=C(C(=O)C=C24)NCC(=O)C  
PUGREST.BadRequest: error: O=C(C(C1)C1)N1C(=O)N[C@H1]2CCC3=C(C(OC)=C(OC)C(OC)=C  
3)C4=CC=C(C(C=C42)=O)NCC=CC=C1  
PUGREST.BadRequest: error: O=C(C(C1)C1)NCC1=CN(N=N1)[C@H1]2CCC3=CC(OC)=C(OC)C(=  
C3C=4C2=CC(C(NC)=CC=4)=O)OCCC1  
PUGREST.BadRequest: error: O=C(OCC=C)NCC1=CN(N=N1)[C@H1]2CCC3=CC(OC)=C(OC)C(OC)  
=C3C4=CC=C(C(C=C24)=O)NCC(=O)C  
PUGREST.BadRequest: error:  
O=C(C)N[C@@H1]1CC(C2=C(C(OC)=C(OC)C=C2CC1)OCC3=CC=CC=C3)=O  
PUGREST.BadRequest: error:  
O=C(C)N[C@@H1]1C=2C(C3=C(C(OC)=C(OC)C=C3CC1)OC(C)=O)C=C(SC)C(C=2)=O  
PUGREST.BadRequest: error:  
O=C(C(C1)C1)NC(=O)N[C@H1]1CCC2=CC(OC)=C(OC)C(OC)=C2C3=CC=C(C(C=C31)=O)NCC(=O)O  
PUGREST.BadRequest: error:  
O=C(C(C)C)OCC(C=C1[C@H1](CCC2=CC(OC)=C(OC)C(O)=C2C1=CC=CO)CSCC)=O  
PUGREST.BadRequest: error:  
O=C(OCC)C1=CN(N=N1)[C@H1]2CCC3=CC(OC)=C(OC)C(OC)=C3C4=CC=C(C(C=C24)=O)NCC(=O)C  
PUGREST.BadRequest: error:  
O=C(C)N[C@@H1]1C=2C(C3=C(C(OC)=C(OC)C=C3CC1)CC=C(SC)C)(C=2)ONC(C)=O  
PUGREST.BadRequest: error:  
O=C(O)CN(CCO)C(=O)N[C@H1]1CCC2=CC(OC)=C(OC)C(OC)=C2C3=CC=C(C(C=C13)=O)NCC  
PUGREST.BadRequest: error:  
O=C(OCC)C=C(C(OCC)=O)N[C@H1]1CCC2=CC(OC)=C(OC)C(OC)=C2C3=CC=C(C(C=C31)S)CC  
PUGREST.BadRequest: error:  
O=C(O)C=C(OC)C(C(NC)=CC=CC1=C(OC)C(OC)=C(OC)C=C1CC[C@@H1](C)NCC)=O  
PUGREST.BadRequest: error:  
O=C(OCC(C)COC1=C)N(N=N1)[C@H1]2CCC3=CC(OC)=C(OC)C(OC)=C3C4=CC=C(C(=O)C=C24)NC

PUGREST.BadRequest: error:  
O(C=CC=CC1=C(OC)C(OC)=CC=C1CC[C@H1] (CC=COC(C2=CC=CC=C2)=O)C(OC)=C)OSC=O

PUGREST.BadRequest: error:  
CCCCCCCCCCCC=1CCCCC(C=C2[C@H1] (CCC3=CC(OC)=C(OC)C(OC)=C3C2=CC=1N)C(=O)C=O)SC

PUGREST.BadRequest: error:  
CCCCCCCCCCCCCCCC=10CC(C=C2[C@H1] (CCC3=CC(OC)=C(OC)C(OC)=C3C2=CC=1N)C(=O)C=O)SC

PUGREST.BadRequest: error:  
CC(C)OC(NCC1=CN(N=N1)[C@H1] 2CCC3=CC(OC)=C(OC)C(OC)=C3C4=CC=CC(C=C24)=O)NC=O

PUGREST.BadRequest: error:  
C1=C(OC)C(OC)=C(OC)C=C1CC[C@@H1] (C2=CC(C(OC(C3=CC=CC=C3)=O)=CC=C2)N)C=O

PUGREST.BadRequest: error:  
OC1=C(OC)C(OC)=CC=C1C2=CC=C(NC)CC=C2[C@@H1] (NC(C(C)C)=O)NCC

PUGREST.BadRequest: error:  
C1=C(OC2)C=C(OC)C=C1CC[C@H1] (NC(C(OC)=O)=C(NCO)OOC3=CCC(NC)=CC=C23)OOC

PUGREST.BadRequest: error:  
C12=C(OC)C(OC)=C(OC)C=C1CC[C@H1] (NC2(C(O)=O)CC=CCC(NC)=C)OSC

PUGREST.BadRequest: error:  
C12=C(OC)C(OC)=C(OC)C=C1CC[C@H1] (NC(C(O)=O)(O)CC3=CC(OC)=C(C=C3C2)N)C=O

PUGREST.BadRequest: error:  
C1=C(OC)C(=CC=C1C2=C(C(OC)=C(OC)C=C2CC[C@H1] (C=CC(C(O)=CC)O)C(C(C)C)=O)S)C

PUGREST.BadRequest: error:  
OC1=C(OC)C(OC)=CC=C1C2=CC=C(NC)CC=C2[C@@H1] (N3C(C(OC)=O)=C(N=N3)C=O)OC

PUGREST.BadRequest: error:  
COC(NCCCCC1=CN(N=N1)[C@H1] 2CCC3=CC(OC)=C(OC)C(=C3C4=CC=C(NC)C(C=C24)=O)OC=O)=O

PUGREST.BadRequest: error: C(=CC=CN(COCC)OCC1)=CN(N=N1)[C@H1] 2CCC3=C(C(OC)=C(OC)C(OC)=C3)C4=CC=C(C(C=C24)=O)NC

PUGREST.BadRequest: error: C=1C(C)(C)OC(=O)/N=C(/N[C@H1] 2CCC3=C(C(OC)=C(OC)C(OC)=C3)C4=CC=C(NC)C(=O)C=C42)N=1

PUGREST.BadRequest: error: C=1C(C)(C)OC(=O)/N=C(/N[C@H1] 2CCC3=C(C(OC)=C(OC)C(OC)=C3)C4=CC=C(C(C=C24)=O)NC)N=1

PUGREST.BadRequest: error:  
C=1C(C)OC(=O)/N=C(/N[C@H1] 2CCC3=C(C(OC)=C(OC)C(OC)=C3)C4=CC=C(NC)C(=O)C=C42)N=1

PUGREST.BadRequest: error:  
C=1NC=2CC=C3[C@H1] (CCC4=C(C(OC)=C(OC)C(=C4)OC)C3=CC=2)NC(C(=O)O)C=CN=1

PUGREST.BadRequest: error:  
O=CC=CC=CC(NCC1=CN(N=N1)[C@H1] CCC2=CC(OC)=C(OC)C(OC)=C2C3=CC=C(C(=O)C=C3)N)C=O

PUGREST.BadRequest: error:  
O=CC=CC1=CC2=C(SC)CC=C1[C@H1] (CC3C=CC(OC)=C(C(=C32)C=O)OCN)NOCNCO

PUGREST.BadRequest: error:  
CNCC1(C2=CC=C(C=C2)NC(=O)N[C@H1] C3CC4=CC(OC)=C(OC)C(OC)=C4C=CC=C(NC)C(=O)C=C31)C

PUGREST.BadRequest: error:  
C1=CN=CC=C1C2=CN(N=N2)[C@H1] 3CCC4=C(C(OC)=C(OC)C(OC)=C4)C5=CC=C(C(=O)C=C35)NCO

PUGREST.BadRequest: error:  
COC=CC1CC[C@H1] (NC(=O)NC=C[C@@H1] (OC(C=CC=C)=O)C2=CC(OC)=C(OC)C(OC)=C2)C1NC=O

PUGREST.BadRequest: error:  
O=CC=C1C=CC(NCC2=CN(N=N2)[C@H1] C3CC4=CC(OC)=C(OC)C(OC)=C4C=CC=C(NC)C(=O)C=C31)NC

PUGREST.BadRequest: error:  
CNC=CC=C1C[C@H1] (CCC2=CC(OC)=C(OC)C(=C12)OC)N3C(C(O)=O)=C(N=N3)C(=O)OONC

PUGREST.BadRequest: error:  
CNC=C1C=C2C[C@H1](CCC3=CC(OC)=C(OC)C(=C23)OCC(=O)OC=C)C1=O

PUGREST.BadRequest: error:  
COC=CC1C=2C[C@H1]NC(=O)NC3=CC=C(C1)C=C3C4=CCC(NC)=CC=C4C=2C(OC)=C1OCNC=O

PUGREST.BadRequest: error:  
C=NC=CCC1OCCC=C2[C@H1](CCC3=C(C(OC)=C(OC)C(OC)=C3)C2=C1)N=O

PUGREST.BadRequest: error:  
COC=C(OC)C(OC)=CCCC[C@H1](N1C=C(N=N1)COC(=O)C2=CC=NC=C2)C3=CC(=O)C(=CC=C3CNCN)C

PUGREST.BadRequest: error:  
C12=CC(C=3C([C@@H1](NCC4=CC=C(C)C=C4CCC1)C2)=CC(=O)C(=CC=3)SC=C)(OC)C(OC)=COC

PUGREST.BadRequest: error:  
C12=C3C(C4=CC=C(C(=O)C=C4[C@H1](CC3)N5C=C(N=N5)COC(=O)C6=CC=NC=C6)C1)NC=C2OCOCOC

PUGREST.BadRequest: error:  
COC1=C(OC)C=CC=2CC[C@@H1](C3=CC(=O)C(NC)=CC=C3C1=2)N4C=C(N=N4)COC5=CC=CC=C5OC

PUGREST.BadRequest: error:  
C1=C2C(CC([C@H1](CC2)N3N=NC(=C3)C4(O)CCCC4)=O)CC(OC)=C(C(=C1)OC)OC

PUGREST.BadRequest: error:  
C=C1C(C=C(CC[C@@H1]1N2N=NC(=C2)C3=CC=C(C1)C=C3)C=C(C(=COC)OC)OC)=CC(C(NC)=C)=O

PUGREST.BadRequest: error:  
C=C1C(C2=C(CC[C@@H1]1N3C=C(N=N3)COC4=CC=CC=C4)C=C(C(OC)=C2OC)OC)=CC=C(CN)C=O

PUGREST.BadRequest: error:  
CC(C)COC=1CC=C2[C@H1](CCC3=C(C(OC)=C(OC)C(OC)=C3)C2=CC=1)NSC=O

PUGREST.BadRequest: error:  
CC(C)(O)C=CN([C@H1]1CCC2=CC(OC)=C(OC)C(OC)=C2C3=CC=C(C(C=C13)=O)NC)O

PUGREST.BadRequest: error: CCCCCCCCCCCCCCCCOCC1=CN(N=N1)[C@H1]2CCC3=CC(OC)=C(OC)C(OC)=C3C=CC=C(NC)C(=O)C=C2O

PUGREST.BadRequest: error: CCCCCCCCCCCCCCCCOCC1=CN(N=N1)[C@H1]2CCC3=CC(OC)=C(OC)C(OC)=C3C=CC=C(NC)C(=O)C=C2OC

PUGREST.BadRequest: error:  
C[C@H1](NC(C)=O)C1=CCC(SC)=CC=C1C2=C(C=C(OC)C(OC)=C2OCC3=CC=CC=C3)OSC

PUGREST.BadRequest: error:  
C=12C(=CC(C(NC)=CC=1)=O)[C@H1](CCC3=CC(OC)=C(OC)C(=C32)OC)C(C)C=O

PUGREST.BadRequest: error:  
NC(=O)NCC1=CN(N=N1)[C@H1]2CCC3=CC(OC)=C(OC)C(OC)=C3C4=CC=C(NC)C(=O)C=C24

PUGREST.BadRequest: error:  
N(C(C1=CC=NC=C12)=O)[C@@H1]3CC(C4=C(C(OC)=C(OC)C=C4CC3)OC(CC)=O)=CC=C(SC)C2=O

PUGREST.BadRequest: error:  
C=12C(=CC(C(NC)=CC=1)=O)[C@H1](CCC3=CC(OC)=C(OC)C(=C3C2)NC(C)C)CSCSC

PUGREST.BadRequest: error:  
C12[C@H1](NC(O)=O)C3=CCC(SC)=CC=C3C4=C(C(OC)=C(OC)C=C4CC1)OC=CC2=O

PUGREST.BadRequest: error:  
C1=CC(OC)=CC=C1CN[C@H1]2CCC3=C(C(OC)=C(OC)C(OC)=C3)C=4C2=CC(C(=CC=4)NC)=O

PUGREST.BadRequest: error:  
C=CC(OC)=C(OC)C(OC)=CC1(C2=CC=C(NC)CC=C2[C@H1](CCC1)NC(=O)C=O)SC

PUGREST.BadRequest: error:  
O(C1=CC(=CC(OC)=C1OC)CC[C@H1](NC(N(C(C)C)C(C2)C)=O)C=CCC(NC)=CC=C2ONC)C

PUGREST.BadRequest: error:  
N(C(C1=CC=CC=C1)=O)CCN[C@H1]2CCC3=CC(OC)=C(OC)C(OC)=C3C4=CC=C(C(C=C24)=O)SC

PUGREST.BadRequest: error:  
C1[C@H1](NC(O)=O)C2=CCC=CC=C2C3=C(OC)C(OC)=C(OC)C=C3CCNC=C1O

PUGREST.BadRequest: error:  
C1=C(C(OC)=C(OC=2)CC3=CC=C(NC)C(C=C3[C@@H1](NC(N(COC)C)O)SCCC=21)NC)OC

PUGREST.BadRequest: error:  
N1=NC1=C(C(=O)O)NC(=O)N[C@H1]2CCC3=CC(OC)=C(OC)C(OC)=C3C=CC=C(NC)C(=O)C=C2

PUGREST.BadRequest: error:  
N=CC=C(NCN[C@H1]1CCC2=CC(OC)=C(OC)C(OC)=C2C3=CC=C(C(C=C13)=O)N)C=O

PUGREST.BadRequest: error:  
N=CC=C(NCN[C@H1]1CCC2=CC(OC)=C(OC)C(OC)=C2C3=CC=C(NC)C(=O)C=C13)O

PUGREST.BadRequest: error:  
N=NC1=CN(N=N1)[C@H1]C2CC3=CC(OC)=C(OC)C(OC)=C3C4=CC=C(C(=O)C=C42)NCOC

PUGREST.BadRequest: error:  
N=NC(=C(C(OC)=O)N[C@H1]1CCC2=CC(OC)=C(OC)C(OC)=C2C3=CC=C(C(C=C13)=O)N)C

PUGREST.BadRequest: error:  
CNC=1C(=O)C=C2[C@H1](CCC3=C(C(OC)=C(OC)C(OC)=C3)C2=CC=1)NC(C(=O)O)=CN=CNC

PUGREST.BadRequest: error:  
C=CC1C[C@H1](NC(C2)=O)C=CC=3C(OC)=C2C1=CC=C(SC)C(C=3)=O

PUGREST.BadRequest: error:  
N1=CC=CC2=C1C(OC=CC(OC=3)=CCCC[C@H1](NC(C)=O)C4=CCC(NC)=CC=C4C=32)=O

PUGREST.BadRequest: error:  
CNC=1C(=O)C=C2[C@H1](CCC3=CC(OC)=C(OC)C(OC)=C3C2=CC=1)NC4(C(=O)O)C=CN=C4NC

PUGREST.BadRequest: error:  
N1=CC=CC=C1COC=C(C(OC=2)=CCCC[C@H1](NC(C)=O)C3=CC(C(SC)=CC=C3C=2OC)O)O

PUGREST.BadRequest: error:  
C=C1[C@H1](CCC2=C(C(OC)=C(OC)C(OC)=C2)C1=CC=CC(C)=O)NCNC(=O)CSC

PUGREST.BadRequest: error:  
CN1CC(=O)C=C2C(C3=C(OC)C(OC)=C(OC)C=C3CC[C@@H1]2N4C(C(O)=O)=C(N=N4)OCNC)=CC1

PUGREST.BadRequest: error:  
NN(C=C(CNC(CCCCC1)=O)N=N)[C@H1]1CCC2=CC(OC)=C(OC)C(OC)=C2C3=CC=C(NC)C(=O)C=C31

PUGREST.BadRequest: error:  
C=C1[C@H1](C=2CC=CC(OC)=C(OC)C(OC(C3=CC=CC=C3)=O)=CC1=CC=C)C(C=2)=O

PUGREST.BadRequest: error:  
N=NC1=CN(N=N1)[C@H1]2CCC3=CC(OC)=C(OC)C(=C3C4=CC=C(NC)C(C=C42)=O)OC

PUGREST.BadRequest: error:  
N=NC=C(C(=O)O)NC(=O)N[C@H1]CCC1=CC(OC)=C(OC)C(OC)=C1C2=CC=C(NC)C(=O)C=C2

PUGREST.BadRequest: error:  
COC1=CC(=CC(OC)=C1OC)CC[C@H1](NC(N(C(C)C)C(C2)C)=O)C=CC(C(NC)=CC=C2NC=O)NC

PUGREST.BadRequest: error:  
C=C1[C@H1](CCC2=CC(OC)=C(OC)C(OC)=C2C1=CC=C(C(C)=O)N3C)NC(C(=O)O)=C3NC

PUGREST.BadRequest: error:  
CNC=1C(=O)C=C2[C@H1](CCC3=CC(OC)=C(OC)C(OC)=C3C2=CC=1)NC(C(=O)O)C=CN=CNC

PUGREST.BadRequest: error:  
N=NC(=C(C(=O)O)NC(=O)N[C@H1]C1CC2=CC(OC)=C(OC)C(OC)=C2C=CC=C(NC)C(=O)C=C1)CC

PUGREST.BadRequest: error: CC(C)(C)OC(=O)NCCC(NCC=1N=NN(C=1)[C@H1]CCC2=CC(OC)=C(OC)C=C2C3=CC=C(NC)C(C=C3)=O)OC=O

PUGREST.BadRequest: error: CC(C)(C)OCNCCC(=O)NCC1=CN(N=N1)[C@H1]C2CC3=CC(OC)=C(OC)C(OC)=C3C4=CC=C(C(=O)C=C24)NC=O

PUGREST.BadRequest: error:  
COC(=O)C1=C(N=NN(CNCC)OCCCC(=O)C2=CC(C3=C(OC)C(OC)=C(OC)C=C3CC[C@@H1]2N1)C)O  
PUGREST.BadRequest: error: CC(C)(C)OCNCCC(=O)NCC1=CN(N=N1)[C@@H1]2C3=CC(C(NC)=C  
C=C3C=C(CC2)C=C(OC)C(OC)NC)=O  
PUGREST.BadRequest: error:  
C1(=CN(C(=O)OCC)N[C@@H1]2C=3C(C4=C(OC)C(OC)=C(OC)C=C4CC2)=CC=C(C(=O)C=3)NC)N=C1  
PUGREST.BadRequest: error: CC(C)(C)OCNCCC(=O)NCC1=CN(N=N1)[C@@H1]2C3=CC(C(NC)=C  
C=C3C4=C(CC2)C=C(OC)C(=C4OC)NC)=O  
PUGREST.BadRequest: error: C1C(C)(C)OC(=O)NCCC1NCC=2N=NN(C=2)[C@H1]3CCC4=CC(OC)  
=C(OC)C(OC)=C4C=CC=C(NC)C(=O)C=C3O  
PUGREST.BadRequest: error: CC(C)(C)OC(=O)NCCC(OCC=1N=NN(C=1)[C@H1]CCC2=CC(OC)=C  
(OC)C(=C2C3=CC=C(NC)C(=O)C=C3)O)C=O  
PUGREST.BadRequest: error:  
CC(C)OC(=O)/N=C(/N[C@H1]1CCC2=C(C(OC)=C(OC)C(OC)=C2)C3=CC=C(NC)C(=O)C=C13)N=N  
PUGREST.BadRequest: error:  
C=1N(N=NC=1C(OCC)=O)[C@H1]2CCC3=C(C(OC)=C(OC)C(OC)=C3)C4=CC=C(C(=O)C=C42)NCOCC  
PUGREST.BadRequest: error:  
O=CC=CN=NN[C@H1]1CCC2=C(C(OC)=C(OC)C(=C2)OC)C3=CC=C(NC)C(=O)C=C13  
PUGREST.BadRequest: error:  
CNC=CC=C1C[C@H1](CCC2=CC(OC)=C(OC)C(=C12)OC)NC3(C(=O)O)C=CN=N3  
PUGREST.BadRequest: error:  
CNC=CC=C1C([C@H1](CCC2=CC(OC)=C(OC)C(=C12)OC)NC(C(=O)OCC)=C(C(OCO)=O)ONC)SC  
PUGREST.BadRequest: error:  
C=1NC=2CC=C3[C@H1](CCC4=C(C(OC)=C(OC)C(OC)=C4)C3=CC=2)NC(C(=O)O)C=CN=1  
PUGREST.BadRequest: error: C1=CN=CC=C1C(NCC2=CN(N=N2)[C@H1]3CCC4=CC(OC)=C(OC)C(  
=C4C5=CC=C(C(C=C53)=O)OC)OO)C  
PUGREST.BadRequest: error:  
N=NN([C@H1]1CCC2=C(C(OC)=C(OC)C(OC)=C2)C3=CC=C(C(=O)C=C13)NC)COC4CC=CC=C4O  
PUGREST.BadRequest: error:  
N=NN([C@H1]1CCC2=C(C(OC)=C(OC)C(OC)=C2)C3=CC=C(C(=O)C=C13)NC)C(=O)OCC  
PUGREST.BadRequest: error:  
N=NN([C@@H1]1C2=CC(C(NC)=CC=C2C3=C(C(OC)=C(OC)C=C3CC1)OC)=O)OCC=C=O  
PUGREST.BadRequest: error:  
C=C1C(C=C(CC[C@@H1]1N2N=NC(=C2)CNC(=O)OCC(C)C)C=C(C(OC)=COC)O)C=CC=C(C=O)NC  
PUGREST.BadRequest: error:  
C=C1C(C2=C(CC[C@@H1]1N3N=NC(=C3)CNC(=O)OCC(C)C)C=C(C(OC)=C2OC)O)C=CC=C(C=O)NC  
PUGREST.BadRequest: error:  
C1=C2C(CC([C@H1](CC2)N3N=NC(=C3)CNC(=O)C(C1)C1)=CC(=O)C(=CC)NC)=C(OC)C(OC)=C1OC  
PUGREST.BadRequest: error:  
CN(N([C@@H1]1C2=CC(=O)C(NC)=CC=C2C3=CC(=C(OC)C=C3CC1)OC)O)CNC(=S)NCCCCC  
PUGREST.BadRequest: error:  
N([C@H1]1CCC2=CC(=C(OC)C(=C2C3=CC=C(C(C=C31)=O)NC)OC4)OC[C@H1])(OC4)NC(=S)O  
PUGREST.BadRequest: error:  
CN(N([C@@H1]1C2=CC(=O)C(NC)=CC=C2C3=CC(=C(OC)C=C3CC1)OC)O)CNC(=S)CCCCC  
PUGREST.BadRequest: error: CN(N([C@@H1]1C2=CC(=O)C(NC)=CC=C2C3=CC(=C(OC)C=C3CC1  
)OC)O)CNC(=S)N4C[C@H1](O)[C@@H1]OC4=CC  
PUGREST.BadRequest: error:  
OC=CC=C1C2=C(OC)C(OC)=C(OC)C=C2CC[C@H1](C3=CCC(=CC=C31)NC)ON

PUGREST.BadRequest: error: O1C=CC=CC2=C(OC)C(OC)=C(OC)C=C2CC[C@@H1]1C=CCC(F)F  
 PUGREST.BadRequest: error:  
O(C=CC=CC1=C(OC)C(OC)=C(OC)C=C1CC[C@H1](C=C2CC(OC(C)C)=O)N=C2ON)C  
 PUGREST.BadRequest: error:  
O(C=CC=CC1=C(OC)C(OC)=C(OC)C=C1CC[C@H1]C=CCC(OC(=O)OCC)=CC)C  
 PUGREST.BadRequest: error:  
O=C(CC)OCC1=CN(N=N1)[C@H1]2CCC3=CC(OC)=C(OC)C(OC)=C3C4=CC=C(NC)C(=O)C=C24  
 PUGREST.BadRequest: error:  
O=C(OC)CCOC=CC=C1C[C@H1](CCC2=CC(OC)=C(OC)C(OC)=C21)NC=O  
 PUGREST.BadRequest: error:  
O(C=CC=CC1=C(OC)C(OC)=C(OC)C=C1CC[C@H1](C=CCC(OC(C)C)=O)N=C2ONC)ONCC  
 PUGREST.BadRequest: error:  
OC=CC=CC1=C(OC)C(OC)=C(OC)C=C1C2C[C@H1](C=CCC(OC(C)C)=O)N=C2ONC  
 PUGREST.BadRequest: error:  
O=C(OCC=C)N1C(=O)N[C@H1]CCC2=C(C(OC)=C(OC)C(OC)=C2)C3=CC=C(NC)C(C=C13)=O  
 PUGREST.BadRequest: error: O=C(OC(C)(C)C)NCC=1N=NN(C=1)[C@H1]C2CC3=CC(OC)=C(OC)C(OC)=C3C4=CC=C(NC)C(=O)C=C42  
 PUGREST.BadRequest: error:  
O=C(C(C)C)NCN[C@H1]1CCC2=CC(OC)=C(OC)C(OC)=C2C3=CC=C(NC)C(=O)C=C13  
 PUGREST.BadRequest: error:  
O=C(OCC(C)OCC=1)N=NN(C=1)[C@@H1]2C3=CC(C(NC)=CC=C3C4=C(OC)C(OC)=C(OC)C=C4CC2)=O  
 PUGREST.BadRequest: error: O=C(OCC)C=1N(N=NC=1C(=O)O2)[C@H1]2NC(=S)N[C@H1]3CCC4=CC(OC)=C(OC)C(OC)=C4C=5C3=CC(C(=CC=5)NC)=O  
 PUGREST.BadRequest: error:  
OC1=C2C3=CC=C(NC)CC=C3[C@H1](CCC2=CC(OC)=C1OC)NC(C(O)=O)=O  
 PUGREST.BadRequest: error:  
CC(O)(OC(=O)CC1)CN(N=N1)[C@H1]2CCC3=CC(OC)=C(OC)C(OC)=C3C4=CC=C(NC)C(=O)C=C24  
 PUGREST.BadRequest: error:  
C1=2C(O)CN(CC3O)N1[C@H1]CCSC(C4=C(C=C(OC)C(OC)=C4OC(O)CCC3=O)CC=2)C  
 PUGREST.BadRequest: error: CC(O)(C)CC(=O)OCC1=CN(N=N1)[C@H1]2CCC3=CC(OC)=C(OC)C(OC)=C3C=4C2=CC(C(=CC=4)NC)=O  
 PUGREST.BadRequest: error:  
CC(C)COC(NCC1=CN(N=N1)[C@H1]C2CC3=CC(OC)=C(OC)C(OC)=C3C4=CC=C(C(=O)C=C24)NC)=O  
 PUGREST.BadRequest: error:  
C=C(NC)CC=C1CC2=C(OC)C(OC)=C(OC)C=C2CC[C@@H1]1N3C(C=CC=C3OC(=O)OC)=O  
 PUGREST.BadRequest: error:  
COCNCC1=CN(N=N1)[C@H1]2CCC3=CC(OC)=C(OC)C(OC)=C3C4=CC=C(NC)C(=O)C=C24  
 PUGREST.BadRequest: error: CC(C)(C)OC(NCC=1N=NN(C=1)[C@H1]2CCC3=CC(OC)=C(OC)C(O)C)=C3C4=CC=C(C(C=C24)=O)N)C=O  
 PUGREST.BadRequest: error:  
OC1=C(C(OC)=CC2=C1C3=CC=C(NC)CC=C3[C@H1](CC2)N4C(C(O)=O)=C(N=N4)OC=O)O  
 PUGREST.BadRequest: error:  
C[C@H1](COC=CN=NN[C@H1]1CCC2=CC(OC)=C(OC)C(OC)=C2C=3C1=CCC(=CC=3)NC)OCCC  
 PUGREST.BadRequest: error:  
N(C)C1=CC=C2C3=C(OC)C(OC)=C(OC)C=C3CC[C@@H1](C2=CC1=O)NC(C(=O)O)CCONCOCNCOC  
 PUGREST.BadRequest: error:  
N(CCCCC)CC1C2C=C[C@H1](CCC3=CC(OC)=C(OC)C(OC(C)=O)=C3C2=CC=C1SCSC=O)C  
 PUGREST.BadRequest: error:

O(C1=C(C(OC)=CC2=C1C3=CC=C(NC)CC=C3[C@H1](CC2)N4C(C(O)=O)=C(N=N4)OC=O)O)OCC  
PUGREST.BadRequest: error:  
N(C(C)C)C(NCC1=CN(N=N1)[C@H1]2CCC3=CC(OC)=C(OC)C(OC)=C3C4=CC=C(C(C=C24)=O)NC)=O  
PUGREST.BadRequest: error:  
N(CCCCCC=O)CC1=CN(N=N1)[C@H1]2CCC3=CC(OC)=C(OC)C(OC)=C3C4=CC=C(C(C=C24)=O)NC  
PUGREST.BadRequest: error:  
N(C(C)=O)[C@H1]1C2=CC(C(SC)=CC=C2C3=C(C(OC)=C(OC)C=C3CC1)OC(C4=CCCC=C4)=O)C  
PUGREST.BadRequest: error:  
N(CCCCC)CC1CC2=C[C@H1](CCC3=CC(OC)=C(OC)C(OC(C)=O)=C3C2=CC=C1SCNC=O)C  
PUGREST.BadRequest: error:  
O=C(OC)C1=C(C(OC)=O)N=NN1[C@H1]CCC2=CC(OC)=C(OC)C(OC)=C2C3=CC=C(NC)C(C=C3)=O  
PUGREST.BadRequest: error:  
N([C@H1]1CCC2=CC(OC)=C(OC)C(OC)=C2C3=CC=C(NC)C(C=C13)=O)C=CCOC(=O)CCCC=O  
PUGREST.BadRequest: error:  
O=C(OC)C1=CC2=C(C=C1)F)N[C@@H1]CC(C3=C(C=C(OC)C(OC)=C3OC(OC)=O)NCCC2)=CC=C(O)C=O  
PUGREST.BadRequest: error:  
C1OC=CC2=C(C3=CC=C(NC)CC=C3[C@@H1](N)CC2)ONC(OC)=C1OC  
PUGREST.BadRequest: error: C1=C2CC[C@H1](C3=CCC(SC)=CC=C3C2=C(C(OC)=C1OC)OC=O)N  
PUGREST.BadRequest: error:  
C=CCC1[C@H1](CC=[N+1]C2=C1CC(C(OC)=C2OCOC=C)C=CSC)C=O  
PUGREST.BadRequest: error:  
C1OC=C2C3=CC=C(NC)C(=O)C=C3[C@H1](CCC2C=COC)NCCCCC=C1  
PUGREST.BadRequest: error:  
C1OC=C2C3=CC=C(NC)C(=O)C=C3[C@H1](CCC2C=COC)NCCCCC=C1OC  
PUGREST.BadRequest: error:  
C1=C2CC[C@H1](CC(C2=C(OC)C(=C1OC)OC)=CC=C(NC)C=O)CN=[N+1]=[N-1]  
PUGREST.BadRequest: error:  
COC=C1C2=C3C=C(NC)C(C=C2[C@@H1](NCCCCCCCCC)CCC1=CC(=C3OC)O)C=O  
PUGREST.BadRequest: error:  
CC(CC)N[C@H1]C1CC2=CC(OC)=C(OC)C(OC)=C2C3=CC=C(C(C=C31)=O)NCC  
PUGREST.BadRequest: error:  
CC(CC)N[C@H1]C1CC2=CC(OC)=C(OC)C(OC)=C2C3=CC=C(NC)C(=O)C=C31  
PUGREST.BadRequest: error:  
C(CCCCN1[C@H1]CCC2=CC(OC)=C(OC)C(OC)=C2C3=CC=C(SC)CC=C13)=O  
PUGREST.BadRequest: error:  
CC(CC)N[C@H1]C1CC2=CC(OC)=C(OC)C(OC)=C2C3=CC=C(C(C=C31)=O)NC  
PUGREST.BadRequest: error:  
C1(=NC=C(O)C(C)=CC1)C2=C(C(OC)=C(OC)C=C2CC[C@H1](O)C=CN)CSC  
PUGREST.BadRequest: error:  
C1(=CC=C(O)C(CCC)C=O)C2=C(OC)C(OC)=C(OC)C=C2CC[C@H1](NC(=O)C)C1SC  
PUGREST.BadRequest: error:  
COC=C1C2=CC=C(NC)C(=O)C=C2[C@@H1](NCC(C)CCC)CCC1=CC(=COC)OC  
PUGREST.BadRequest: error:  
C1OC=C2C3=CC=C(NC)C(=O)C=C3[C@@H1](NC(=N)N)CCC2=CC(OC)=C1OC  
PUGREST.BadRequest: error:  
COC1=C2C3=CC=C(NC)C(=O)C=C3[C@@H1](NCC(CCC)C)CCC2=CC(OC)=C1OC  
PUGREST.BadRequest: error:  
NC1=CC=CC=C1C2=CC3=C(OC)C(=C(OC)C=C3CC[C@H1](NCCC)C2NCOC)O



PUGREST.BadRequest: error:  
COC=C1C2=CC=C(NC)CC=C2[C@@H1](NCCC#N)CCC1=CC(=COC)OC=O  
PUGREST.BadRequest: error:  
C1=C2CC[C@H1](C3=CCC(SC)=CC=C3C2=C(C(OC)=C1OC)OC=O)NCCC#N  
PUGREST.BadRequest: error:  
C1=C2CC[C@H1](C3=CCC(SC)=CC=C3C2=C(C(OC)=C1OC)OC=O)NCCC  
PUGREST.BadRequest: error:  
COC1=C2C3=CC=C(NC)C(=O)C=C3[C@H1](CCC2=CC(OC)=C1OC)NCC4=CC=NS4  
PUGREST.BadRequest: error:  
COC1=C2C3=CC=C(SC)C(=O)C=C3[C@H1](CCC2=CC(OC)=C1OC)NCCCC1  
PUGREST.BadRequest: error:  
COC1=C2C3=CC=C(NC)C(=O)C=C3[C@H1](CCC2=CC(OC)=C1OC)NCC=CC=NCN  
PUGREST.BadRequest: error:  
COC1=C2CC([C@H1](CCC2=CC(OC)=C1OC)NCCCC1)C(C(=CC)NC)=O  
PUGREST.BadRequest: error:  
C=1NCC(=O)C=C2C=1C3=C(OC)C(OC)=C(C=C3CC[C@@H1]2NCCCC1)C=CC  
PUGREST.BadRequest: error:  
O(C1=C(OC)C(OC)=CC23C([C@@H1](NC(N)=S)CCC2=C1)=CC(C(NC)=CC3)=O)NCC  
PUGREST.BadRequest: error:  
O(C1=C(OC)C=2C3=CC=C(SC)CC=C3[C@H1](CCC=2C=C1OC)NC(C)CC=C)OC  
PUGREST.BadRequest: error:  
C1=C(OC)C(OC)=C(OC)CC2=CC=C(SC)C(C=C2[C@@H1](NC(N(C)C)=O)CCC1)=O  
PUGREST.BadRequest: error:  
C12=C(OC)C(OC)=C(OC)C=C1CC[C@H1](NC(C3)=O)C(C(NC)=CC=C32)=O  
PUGREST.BadRequest: error:  
C1[C@H1](OCCC2)CC=C(C(OC)=C(OC)C=C2CC1N3C=CC=C(NC)CC3)ONC(C)=O  
PUGREST.BadRequest: error:  
N(C)C=1C(=O)C=C2[C@H1](CCC3=CC(OC)=C(OC)C(OC)=C3C2=CC=1N)C(C)CCSCSC  
PUGREST.BadRequest: error:  
O(C1=C(OC)C=2C3=CC=C(SC)C(C=C3[C@H1](CCC=2C=C1OC)NC(C)CC=C)=O)C  
PUGREST.BadRequest: error:  
C12=C(OC)C(=C(OC)C=C1CC[C@H1](NCC(O)=O)C3=CCC(NC)=CC=C32)OOC  
PUGREST.BadRequest: error:  
C1[C@H1](NCC)CC2=CC(C(NC)=CC=C2C3=C(OC)C(OC)=C(OC)C=C3C1N)C(=O)C  
PUGREST.BadRequest: error:  
C1=C(OC)C(OC)=C(OC=2)CC3=CC=C(SC)C(C=C3[C@@H1](NC(N(C)C)=O)CCC=21)=O  
PUGREST.BadRequest: error:  
N(C)C=1C(=O)C=C2[C@H1](CCC3=CC(OC)=C(OC)C(OC)=C3C2=CC=1N)C(C)CCNC  
PUGREST.BadRequest: error:  
C1=C2CC[C@H1](C3=CCC(SC)=CC=C3C2=C(C(OC)=C1OC=4)OC=O)NCC=CC=4  
PUGREST.BadRequest: error:  
COC1=CC2=CC=C(SC)C(=O)C=C2[C@@H1](NCC3=CC=CC=C3)CCC1=CC(OC)=COC  
PUGREST.BadRequest: error:  
N1=NN([C@@H1]C2=CC(C(O)=CC=C2C3=C(CC)C=C(OC)C(OC)=C3OC)=O)CC(O)=C1F  
PUGREST.BadRequest: error:  
N1=NN([C@@H1]C2=C3C(C(C)=CC=C3C4=C(CC2)C=C(OC)C(OC)=C4OC)=O)N=CC=N1  
PUGREST.BadRequest: error:  
CNC=1C(C=C2[C@H1](CCC3=C(C(OC)=C(OC)C(OC)=C3)C2=CC=1)NC(C)=O)SC=O

PUGREST.BadRequest: error:  
N1=NC=CN=C2C1(C3=C[C@H1](CCC=C2C(OC)=C(OC)C(OC)=C3N)C(C)C=C)OF  
PUGREST.BadRequest: error:  
O=CC=C1N=NN(C1)[C@H1]2C3=CC(C(NC)=CC=C3C4=C(OC)C(OC)=C(C=C4CC2)OC)NC  
PUGREST.BadRequest: error:  
N1=NN([C@H1]C2=CC(C(OC)=CC=C2C3=C(CC)C=C(OC)C(OC)=C3OC)=O)CC=C1  
PUGREST.BadRequest: error:  
O=CC1=CN=NN1[C@H1]2CCC3=C(C(OC)=C(OC)C(OC)=C3)C4=CC=C(C(C=C42)N)COC  
PUGREST.BadRequest: error:  
C1=CN=CC=C1CN[C@H1]2CCC3=CC(OC)=C(OC)C(OC)=C3C4=CC=C(C(C=C24)=O)NCC  
PUGREST.BadRequest: error:  
CSC=1C(C=C2[C@H1](CCC3=C(C(OC)=C(OC)C(OC)=C3)C2=CC=1)NC(C)=O)NC=O  
PUGREST.BadRequest: error:  
C1NC=CC=C2C([C@H1](NC(C(C)C)=O)CCC3=CC(OC)=C(OC)C(OC)=C23)C1=O  
PUGREST.BadRequest: error:  
O=CC1=CN=NN1[C@H1]2CCC3=CC(OC)=C(OC)C(OC)=C3C4=CC=C(C(C=C42)=O)NC  
PUGREST.BadRequest: error:  
OCCN(CC=C)C(=O)N[C@H1]1CCC2=CC(OC)=C(OC)C(OC)=C2C3=CC=C(NC)C(=O)C=C31  
PUGREST.BadRequest: error:  
O=C1C2=C[C@H1](CCC=C3C(OC)=C(OC)C(OC(C)=O)=C3C2=CC=C1NC(C)=O)NC  
PUGREST.BadRequest: error:  
OCCN(CC=C)C(=O)N[C@H1]1CCC2=CC(OC)=C(OC)C(OC)=C2C3=CC=C(NC)C(=O)C=C13  
PUGREST.BadRequest: error:  
C=CN=C1C(C)NC(=O)OC=CC=C2C3=C(OC)C(OC)=C(OC)C=C3CC[C@H1](C2=C1)NCCC  
PUGREST.BadRequest: error:  
O=C1C=C2[C@H1]CCC3=CC(OC)=C(OC)C(OC)=C3C2=CC=C1SCNC(C)=O  
PUGREST.BadRequest: error:  
N1=NC(=CN(N=N1)[C@H1]2CCC3=CC(OC)=C(OC)C(OC)=C3C4=CC=C(C(C=C24)=O)N)C  
PUGREST.BadRequest: error:  
C12=CC(C(NC)=CC=C1C3=C(C=C(OC)C(OC)=C3OC)CC[C@H1]2NCCC(F)(F)F)=CO  
PUGREST.BadRequest: error:  
C1=C2C([C@H1](CCC3=CC(OC)=C(C(=C32)OC)OC)NCCCC1)C(C(=C1)NC)=O  
PUGREST.BadRequest: error:  
CNC(N(C)C)CN[C@H1]1CCC2=CC(OC)=C(C(OC)=C2C=3C1=CC(=O)C(NC)=CC=3)OC  
PUGREST.BadRequest: error:  
N1C(NC)=CC=C2C([C@H1](CCC3=CC(OC)=C(C(OC)=C23)OC)NCCC(C)C)=CC1=O  
PUGREST.BadRequest: error:  
C12=CCC(NC)=CC=C1C3=C(C=C(OC)C(OC)=C3OC)CC[C@H1]2NCC=4SC=CC=4O  
PUGREST.BadRequest: error:  
C12=CC(C(NC)=CC=C1C3=C(OC)C(=C(C=C3CC[C@H1]2N4C=C(CO)N=N4)O)CO)C=O  
PUGREST.BadRequest: error:  
C=1=C2C([C@H1](CCC3=CC(OC)=C(C(OC)=C23)OC)NCC=CC=O)C(=CC=1)SC  
PUGREST.BadRequest: error:  
COC=C(OC)C(OC)=CCCC=1[C@H1](NCC(C)C)C2=CC(=O)C(SC)=CC=C2C=1  
PUGREST.BadRequest: error:  
C1=C2C(C3=C(OC)C(=C(C=C3CC[C@H1]2NCC4=CC=CS4)O)CO)C=CC=C(NC)C1=O  
PUGREST.BadRequest: error:  
COC1=C(OC)C(OC)=CCCC=2[C@H1](NCC(C)C)C3=CC(=O)C(SC)=CC=C3C1=2

PUGREST.BadRequest: error:  
C1=CC(C(=CC=C1C2=C(OC)C(OC)=C(C=C2CC[C@@H1]NCCOO)C)OC)(CC)O

PUGREST.BadRequest: error:  
NC(N(CC)OC)N[C@H1]1CCC2=CC(OC)=C(OC)C(OC)=C2C=3C1=CC(=O)C(NC)=CC=3F

PUGREST.BadRequest: error:  
O=CC(SC)=CC=C1C([C@H1](CCC2=CC(OC)=C(OC)C(OC)=C12)N)=CCNC

PUGREST.BadRequest: error:  
O=C1C(SC)=CC=C2C([C@H1](CCC3=CC(OC)=C(OC)C(OC)=C23)NCC)C=C1

PUGREST.BadRequest: error:  
C12=CC=C(NC)C(C=C1[C@@H1](NC(C)=O)CCC3=CC(OC)=C(OC)C(OC)=C23)SC=O

PUGREST.BadRequest: error:  
OC(OC1=C2C3=CC=C(SC)C(C=C3[C@H1]CCC2=CC(=C1OC)O)CNC(C)=O)=O

PUGREST.BadRequest: error:  
O1C(OC2=C3C4=CC=C(SC)C(C=C4[C@H1]CCC3=CCOC)=C2OCNC=CC=C1)C

PUGREST.BadRequest: error:  
C12=CC=C(NC)C(C=C1[C@@H1](NC(N)=O)CCC=CC(OC)=C(OC)C(OC)=C2)O

PUGREST.BadRequest: error:  
NC(CCN[C@H1]1CCC2=CC(OC)=C(OC)C(OC)=C2C=3C1=CC(=O)C=CC=3)NCF

PUGREST.BadRequest: error:  
O=C1C(NC)=CC=C2C3=C(OC)C(OC)=C(C=C3CC[C@@H1](C2=C1)NCC)OOCSC

PUGREST.BadRequest: error:  
C1[C@H1](C2=CC(C(SC)=CC=C2C3=C(OC)C(OC)=C(C=C3C1)O)C)ONC

PUGREST.BadRequest: error:  
C12=CC=C(NC)C2(C=C1[C@@H1](NC(C)=O)CCC3=CC(OC)=C(OC)C(OC)=C3)SC

PUGREST.BadRequest: error:  
C1=C2C=C(NC)C(C=C1[C@H1]CCC3=CC(OC)=C(OC)C(OC)=C23)NC(N)=O

PUGREST.BadRequest: error:  
C1=C2C=C(NC)C(C=C1[C@H1]CCC3=C2C(OC)=C(OC)C(OC)=C3)NC(C)=O

PUGREST.BadRequest: error:  
COCC(C)=CC1=CC([C@@H1](NC(C)=O)CCC2=CC(OC)=C(OC)C(OC)=C21)=CSC

PUGREST.BadRequest: error:  
C1[C@H1](C2=CCC(SC)=CC=C2C3=C(OC)C(OC)=C(OC)C=C3C1)ONCC

PUGREST.BadRequest: error:  
C=C1C2=C(OC)C(OC)=C(OC)C=C2CC[C@H1](NC(C)=O)C1=CC=C(NC)C(=O)CNC

PUGREST.BadRequest: error:  
C=1C2=CC(=CC(C=1OC)=O)[C@H1](CCC3=CC(OC)=C(OC)C(OC)=C32)NC(C)=O

PUGREST.BadRequest: error:  
NC(N=C1C=CC2)=CC=C1C3=C(OC)C(OC)=C(OC)C=C3CC[C@@H1]2NC(N)=O

PUGREST.BadRequest: error:  
C=CC1=C(NC)C(OC)=C(OC)C=C1CC[C@H1](NC(C)=O)C2=CC(C(=CC=C2)NC)=O

PUGREST.BadRequest: error:  
C[C@H1](CCC1=CC(OC)=C(OC)C(OC)=C1C2=CC=C(C(C=C2)N)C=O)NCC

PUGREST.BadRequest: error:  
C=1=C2C3=C(OC)C(OC)=C(OC)C=C3CC[C@H1](NC(N)=O)C2=CC=C(SC)C(=O)C=1NC

PUGREST.BadRequest: error:  
C[C@@H1](C1CC2=CC(OC)=C(OC)C(OC)=C2C3=CC=C(C(C=C31)=O)SCN)C(=O)C

PUGREST.BadRequest: error:  
C1=2[C@H1](CC(C3=CC(OC)=C(OC)C=C31)C=CC=C(NC)CC=2)OSC

PUGREST.BadRequest: error:  
C=C(C)C=C1C(C(OC(C)=O)=CC=CC2=C(OC)C(OC)=C(OC)C=C2CC[C@H]1N=O)C  
 PUGREST.BadRequest: error:  
CC(N)(CCO)[C@H]1CCC2=CC(OC)=C(OC)C(OC)=C2C3=CC=C(NC)C(=O)C=C31  
 PUGREST.BadRequest: error:  
CC(N)(CCO)[C@H]1CCC2=CC(OC)=C(OC)C(OC)=C2C3=CC=C(C(=O)C=C31)NCC  
 PUGREST.BadRequest: error:  
C=C1[C@@H]1(NC(C)=O)CCC2=CC(OC)=C(OC)C(OC)=C2C1=CC=C(NC)C=O  
 PUGREST.BadRequest: error:  
C12[C@H]1(NC(C)=O)C3=CC(C(SC)=CC=C3C4=C(OC)C(OC)=C(C=C4C1)OC=C2)NC=O  
 PUGREST.BadRequest: error:  
N(NCCCC1)[C@H]1CCC2=CC(OC)=C(OC)C(OC)=C2C3=CC=C(NC)C(=O)C=C31  
 PUGREST.BadRequest: error:  
N(C1=CC=C(C=C1)C)CN[C@H]1CCCC3=CC(OC)=C(OC)C(OC)=C3C=4C2=CC(C(NC)=CC=4)=O  
 PUGREST.BadRequest: error:  
C12[C@H]1(NC(C)=O)C3=CC(C(NC)=CC=C3C4=C(OC)C(OC)=C(OC)C=C4C1=C2)NC=O  
 PUGREST.BadRequest: error:  
N1(C(=O)OC2=CC=CC3=C(OC)C(OC)=C(OC)C=C3CC[C@H]1(NC(C)=O)C2=CC1)SC  
 PUGREST.BadRequest: error:  
C1[C@H]1(NC(N)=O)C2=CC(C(NC)=CC=C2C3=C(C(OC)=C(OC)C=C3CC1)OC)NC=O  
 PUGREST.BadRequest: error:  
N(C1=CC=C(C=C1)C)CN[C@H]1CCCC3=CC(OC)=C(OC)C(OC)=C3C=4C2=CC(C(=CC=4)SC)=O  
 PUGREST.BadRequest: error:  
N(C1=CC=C(C=C1)C1)C=CN(OC(CC)=O)[C@H]1CCC2=CC(OC)=C(OC)C(OC)=C2C=CC=C(C)CNC=O  
 PUGREST.BadRequest: error:  
C12=C(CC=C3[C@H]1)(CCC4=CC(OC)=C(OC)C(OC)=C4C3=C1)NCC)OC2=O  
 PUGREST.BadRequest: error:  
C=C(CN[C@H]1CCC2=CC(OC)=C(OC)C(OC)=C2C3=CC=C(NC)C(C=C31)=O)C=O  
 PUGREST.BadRequest: error:  
C1#CC(C=C2[C@H]1)(CCC3=CC(OC)=C(OC)C(OC)=C3C2=C1)NC(C)=O)=C  
 PUGREST.BadRequest: error:  
C=C1[C@@H]1(NC(N)=O)CCC2=CC(OC)=C(OC)C(OC)=C2C1=CC=C(NC)C=O  
 PUGREST.BadRequest: error:  
CCN(CC)C(=O)N[C@H]1C1CC2=CC(OC)=C(OC)C(OC)=C2C3=CC=C(C(C=C31)=O)NC  
 PUGREST.BadRequest: error:  
C1[C@H]1(NC(C)=O)C2=CCC(SC)=CC=C2C3=C(OC)C(OC)=C(C=C3C1)OCNC(=O)C  
 PUGREST.BadRequest: error:  
C=1C=C(NC)C(C=C2[C@H]1)(CCC3=CC(OC)=C(OC)C(OC)=C3C=12)CC=O)NSC=O  
 PUGREST.BadRequest: error:  
C1=CC(=CC=C1CCCN[C@H]1)CCCC3=CC(OC)=C(OC)C(OC)=C3C4=CC=C(SC)C(C=C42)=O  
 PUGREST.BadRequest: error:  
N1([C@@H]1)2C3=CC(C(SC)=CC=C3C4=C(OC)C(OC)=C(C=C4CC2)OC=CC=C1)O)CS  
 PUGREST.BadRequest: error:  
CCN(CC)C(=O)N1[C@H]1CCC2=CC(OC)=C(OC)C(OC)=C2C3=CC=C(NC)C(C=C31)=O  
 PUGREST.BadRequest: error:  
C1=CC(=CC=C1CCN[C@H]1)CCCC3=C(C(OC)=C(OC)C(OC)=C3C4=CC=C(SC)C(C=C42)=O  
 PUGREST.BadRequest: error:  
C1=CC(=CC=C1O)CN[C@H]1)CCCC3=CC(OC)=C(OC)C(OC)=C3C4=CC=C(SC)C(C=C42)=O

PUGREST.BadRequest: error:  
CCN(CC)C(=O)N[C@H1]1CCC2=CC(OC)=C(OC)C(OC)=C2C3=CC=C(C(C=C31)=O)NCC  
PUGREST.BadRequest: error:  
CCN[C@@H1]1C2=CC(C(NC)=CC=C2C3=C(OC)C(OC)=C(OC)C=C3CC1=O)=O  
PUGREST.BadRequest: error:  
CC(C)COC1=C(OC)C(OC)=CC=2CC[C@H1](NC(=O)C)C3=CC(C(SC)=CC=C3C1=2)=O  
PUGREST.BadRequest: error:  
CC(C)NC(N[C@H1]1CCC2=CC(OC)=C(OC)C(=C2C3=CC=C(NC)C(C=C31)=O)OC=O)C  
PUGREST.BadRequest: error:  
C=C(C)CN(CCO)C(=S)N[C@H1]1CCC2=C(C(OC)=C(OC)C(OC)=C2)C3=CC=C(NC)C(C=C31)=O  
PUGREST.BadRequest: error:  
CC(C)C(OC=C(C(OC)=CC=1CC[C@H1](NC(=O)C)C2=CC(C(SC)=CC=C2C=1)S)C=O)=O  
PUGREST.BadRequest: error:  
C=C(O)C(OC)=CC(=C)CN[C@H1]1CCC2=CC(OC)=C(OC)C(OC)=C2C3=CC=C(SC)C(C=C31)=O  
PUGREST.BadRequest: error:  
CC(C)C(OC=C(C(OC)=CCCC[C@H1](NC(=O)C)C1=CC(C(SC)=CC=C1C)=O)C)=O  
PUGREST.BadRequest: error:  
CC(CO1)(C(C)CO[C@H1]CCC2=C)C(OC)=C(OC)C(OC(=O)C)=C2C3=CC=C(NC)C(C=C31)=O  
PUGREST.BadRequest: error:  
O=C(N[C@@H1]1C2=CCC(NC)=CC=C2C3=C(CC1)C=C(OC)C(OC)=C3OC)OCC=C  
PUGREST.BadRequest: error:  
N([C@H1]1CCC2=CC(OC)=C(OC)C(OC)=C2C3=CC=C(NC)C(=O)C=C31)=C(C1)C=C  
PUGREST.BadRequest: error:  
O=C(N[C@H1]1CCC2=CC(OC)=C(OC)C(OC)=C2C3=CC=C(C(C=C31)=O)NCN)C4=CC=CC=C4  
PUGREST.BadRequest: error:  
N([C@H1]1CCC2=CC(OC)=C(OC)C(OC)=C2C3=CC=C(NC)C(C=C13)=O)C(C)C  
PUGREST.BadRequest: error:  
O=C(N[C@@H1]1C2=CC(C(NC)=CC=C2C3=C(CC1)C=C(OC)C(OC)=C3OC)=O)N=N  
PUGREST.BadRequest: error:  
N([C@H1]1CCC2=CC(OC)=C(OC)C(OC)=C2C3=CC=C(NC)C(C=C13)=O)=CC=C  
PUGREST.BadRequest: error:  
O=C(N[C@@H1]1C2=CCC(NC)=CC=C2C3=C(CC1)C=C(OC)C(OC)=C3OC)ON=N  
PUGREST.BadRequest: error:  
N([C@H1]1CCC2=CC(OC)=C(OC)C(OC)=C2C3=CC=C(NC)C(C=C13)=O)CNC(=O)OCCONC  
PUGREST.BadRequest: error:  
O=C(N[C@H1]1CCC2=C3C(OC)=C(OC)C(OC)=C2C4=CC=C(NC)C(C=C14)=O)CCOC3  
PUGREST.BadRequest: error:  
O=C(N[C@H1]1CCC2=CC(OC)=C(OC)C(OC)=C2C3=CC=C(NC)C(=O)C=C31)CCOC(=O)O  
PUGREST.BadRequest: error:  
C=C1CC[C@@H1](C2=CCC(OC(C3=CC=CC=C3)=O)=CC=C2C=C1C=COC)C(OC)=COC=O  
PUGREST.BadRequest: error:  
C1=CCC[C@H1](NC(=S)NC2=CC=C(C=C2)C(F)(F)F)CC(C1)=CC=C(NC)C(=O)COCOC  
PUGREST.BadRequest: error:  
COC1=CC2=CC=C(NC)C(C=C2[C@@H1](NC(=O)NC3=CC=CC=C3)CCC1=CC(=COC)O)C=O  
PUGREST.BadRequest: error:  
C1=C2CC[C@@H1](C3=CCC(SC)=CC=C3C2=C(OC)C(=C1OC)OC=O)NCC4=C(C=CC=C4)O  
PUGREST.BadRequest: error:  
COC1=CC2=C3C=C(NC)C(=O)C=C2[C@@H1](NC(=S)N(CCO)CCCC)C3=CC(OC)=C1OC

PUGREST.BadRequest: error:  
COC=CC1=C(C2=CC=C(SC)CC=C2[C@H1](CC1)NC(=O)NC3=CC=C(F)C)C3=O

PUGREST.BadRequest: error:  
C1=C2CC[C@H1](C3=CCC(SC)=CC=C3C2=C(OC)C(=C1OC)OC=O)NC(=O)NC4=CC=CC=C4

PUGREST.BadRequest: error:  
C=C1C2C[C@H1](N3C=C(COC(=O)C4=CC=CC=C4C1)N=N3)C5=CC(C(NC)=CC=C5C2=CC1O)C=O

PUGREST.BadRequest: error:  
C=CC1=C(C2=C(OC)C(OC)=C1OC(OCC)=O)CC[C@H1](NC(C)=O)C3=CC(C(SC)=CC=C23)=O

PUGREST.BadRequest: error:  
O=CC(=CC1=CC[C@H1](CCC2=CC(OC)=C(OC)C(OC(=O)C)=C21)CC=O)OSC

PUGREST.BadRequest: error:  
C1[C@@H1](C2=CC(C(SC)=CC=C2C3=C(OC)C(OC)=C(C=C3CC)OCNCC)=O)C1NC=O

PUGREST.BadRequest: error:  
C[C@@H1](C1=CCC(OC(OC)=O)=CC=C1C2=C(OC)C(OC)=C(OC)C=C2CN)C(C)=O

PUGREST.BadRequest: error:  
OCC(C(C1)=O)N(N=N1)[C@H1]2CCC3=CC(OC)=C(OC)C(OC)=C3C4=CC=C(NC)C(=O)C=C24

PUGREST.BadRequest: error:  
CNCC(O)(C)C1=CN(N=N1)[C@H1]2CCC3=CC(OC)=C(OC)C(OC)=C3C4=CC=C(C(=O)C=C24)NC

PUGREST.BadRequest: error:  
O1C=C(NC)CC=C1CN[C@H1]2CCC3=CC(OC)=C(OC)C(OC)=C3C4=CC=C(SC)C(C=C24)=O

PUGREST.BadRequest: error:  
N=1C(=CN(N=1)[C@H1]2CCC3=CC(OC)=C(OC)C(OC)=C3C4=CC=C(NC)C(C=C24)=O)C=O

PUGREST.BadRequest: error:  
C=CC=C(C(=O)OC=CC1=CC([C@@H1](NC(C)=O)CCC2=CC(OC)=C(OC)C(OC)=C21)SC=C)C

PUGREST.BadRequest: error:  
N1([C@H1]2CCC3=C(C(OC)=C(OC)C(OC)=C3)C4=CC=C(NC)C(C=C24)=O)C(C1)=C1

PUGREST.BadRequest: error:  
N1([C@H1]2CCC3=C(C(OC)=C(OC)C(OC)=C3)C4=CC=C(NC)C(C=C42)=O)C=C1C1

PUGREST.BadRequest: error:  
N1([C@H1]2CCC3=C(C(OC)=C(OC)C(OC)=C3)C4=CC=C(NC)C(C=C42)=O)C(C1)=C1

PUGREST.BadRequest: error:  
O=CC1=CN(N=N1)[C@H1]2CCC3=CC(OC)=C(OC)C(OC)=C3C4=CC=C(NC)C(=O)C=C24

PUGREST.BadRequest: error:  
C1N([C@H1]2CCC3=CC(OC)=C(OC)C(OC)=C3C4=CC=C(NC)C(=O)C=C24)CC(OC)=C1

PUGREST.BadRequest: error:  
N1([C@H1]2CCC3=C(C(OC)=C(OC)C(OC)=C3)C4=CC=C(NC)C(C=C24)=O)C(O)=C1C

PUGREST.BadRequest: error:  
N1([C@H1]2CCC3=C(C(OC)=C(OC)C(OC)=C3)C4=CC=C(NC)C(C=C24)=O)C(O)=C1

PUGREST.BadRequest: error:  
O=CC1=CN(N=N1)[C@H1]2CCC3=CC(OC)=C(OC)C(OC)=C3C4=CC=C(NC)C(=O)C=C42

PUGREST.BadRequest: error:  
C1N([C@H1]2CCC3=CC(OC)=C(OC)C(OC)=C3C4=CC=C(C(C=C42)=O)NCC=C)C(OC)=C1OC

PUGREST.BadRequest: error:  
N([C@H1]1CCC2=C(C(OC)=C(OC)C(OC)=C2)C3=CC=C(NC)C(C=C13)=O)NC=CC=CC1

PUGREST.BadRequest: error:  
N1([C@H1]2CCC3=C(C(OC)=C(OC)C(OC)=C3)C4=CC=C(NC)C(C=C42)=O)C=C1I

PUGREST.BadRequest: error:  
N(CCCC)CC1=CN(N=N1)[C@H1]2CCC3=C(C(OC)=C(OC)C(OC)=C3)C4=CC=C(NC)C(=O)C=C24

PUGREST.BadRequest: error:  
C1=C(O)C(OC)=CC(CN[C@H1]2CCC3=C(C(OC)=C(OC)C(OC)=C3)C4=CC=C(SC)C(=O)C=C42)=C1C  
PUGREST.BadRequest: error:  
N(C(C)C)(C(C)C)C(=O)N[C@@H1]1CC(C2=C(C(OC)=C(OC)C=C2CC1)OC)(CC)OCC=C(NC)C(C)=O  
PUGREST.BadRequest: error:  
N(C)C[C@H1](C1=CC(C(NC)=CC=C1C2=C(OC)C(OC)=C(C=C2CC)OCNCC)=O)C=C  
PUGREST.BadRequest: error:  
C1=2[C@H1](OC1)CCCC=C(C3=C(OC)C(OC)=C(OC)C=C3CC=CC=CNC)C(C=2)=O  
PUGREST.BadRequest: error:  
N(CCCC)CC1=CN(N=N1)[C@H1]2CCC3=C(C(OC)=C(OC)C(OC)=C3)C4=CC=C(NC)C(C=C24)=O  
PUGREST.BadRequest: error:  
C1=C(OC)C(=C(OC)C=C1CC[C@H1](NC(C(O)=O)C(=O)OCC=CC(OC)=C(OC)C=C)OCNC)O  
PUGREST.BadRequest: error: C12=C(NC)CC([C@@H1](C3N=NC03)C=C1OC=CCC2SC)=O  
PUGREST.BadRequest: error:  
C1=C(OC)C(=C(OC)C=C1CC[C@H1](NC(C(OCC)=O)=C(NCO)OOC2=CCC(NC)=CC=C2)ON)C  
PUGREST.BadRequest: error:  
N1(CCCC)CC2=CN(N=N2)[C@H1]3CCC4=CC(OC)=C(OC)C(OC)=C4C5=CC=C(C(C=C53)=O)NCC=C1  
PUGREST.BadRequest: error:  
N(C)C(=O)NCCC(OCC(C=C1[C@H1](CCC2=CC(OC)=C(OC)C(OC)=C2C1=CCN)C(C)=O)S)C=O  
PUGREST.BadRequest: error:  
C1=C(OC2)C(=CC=C1C3=CC(OC)=C(OC)C=C3CC4[C@H1](CCC=CC=C4COC(C)=O)C2OCOC)ONC  
PUGREST.BadRequest: error:  
C1[C@H1](C2=CCC(SC)=CC=C2C3=C(OC)C(OC)=C(C=C3C1)OC)ONC  
PUGREST.BadRequest: error:  
C12=CC=C(NC)C(C=C1[C@@H1](NCC)CCCC=CC(OC)=C(OC)C(OC)=C2)SC=O  
PUGREST.BadRequest: error:  
C1[C@@H1](C2=CC(C(NC)=CC=C2C3=C(OC)C(OC)=C(C=C3C1)O)C)ONCC  
PUGREST.BadRequest: error:  
N=CC(C(OC(OCC)=O)=CC=CC1=C(OC)C(OC)=COC)C=C1CC[C@H1](NCCC)C=O  
PUGREST.BadRequest: error:  
COC(C)=C(C(OC)=CCCC[C@H1](NCC)C1=CC(C(SC)=CC=C1)=O)OC  
PUGREST.BadRequest: error:  
C=CC(N[C@H1]C1CC2=C(C(OC)=C(OC)C(OC)=C2)C3=CC=C(NC)C(=O)C=C31)OO  
PUGREST.BadRequest: error:  
COC1C(C)=C(C=2C3=CC=C(SC)CC=C3[C@H1]CCC=2C=C1)NCNCCOOOC  
PUGREST.BadRequest: error:  
C1[C@@H1](C2=CC(C(NC)=CC=C2C3=C(OC)C(OC)=C(C=C3C1)OC=O)N)CCO  
PUGREST.BadRequest: error:  
CC1=C2C(=C(OC)C(OC)=C1C3=CC=C(NC)C(C=C3[C@H1](C2)NC)C)OONC  
PUGREST.BadRequest: error:  
COC1=C(OC)C=2C3=CC=C(SC)CC=C3[C@H1](CCC=2C=C1OC)NCC4=CC=CC=C4O  
PUGREST.BadRequest: error:  
C[C@H1](CCC1=CC(OC)=C(OC)C(OC)=C1C2=CC=C(C(=O)C=C2)NCN)CCO  
PUGREST.BadRequest: error:  
NC(=O)N1[C@@H1]C2=CC(C(NC)=CC=C2C3=C(OC)C(OC)=C(OC)C=C3CC1)=O  
PUGREST.BadRequest: error:  
NN(CCO)[C@@H1]1C2=CC(C(NC)=CC=C2C3=C(OC)C(OC)=C(C=C3CC1)OC)=O  
PUGREST.BadRequest: error:

C1=2[C@H1](CCC3=CC(OC)=C(OC)C(OC)=C3C1=CC=C(NC)C(=O)C=2NC)CO  
 PUGREST.BadRequest: error:  
C12=CC(C=CC=C1C3=C(OC)C(OC)=C(OC)C=C3CC[C@H1]2NCC=CC=CC=C)SCC  
 PUGREST.BadRequest: error:  
N=C1C(C(OC(C)=O)CCC2=C(OC)C(OC)=C(OC)C=C2CC[C@H1]1)N=O  
 PUGREST.BadRequest: error:  
NC1(N=CC=C1S)[C@H1]2CCC3=CC(OC)=C(OC)C(OC)=C3C4=CC=C(C(C=C24)N)C=O  
 PUGREST.BadRequest: error:  
NC(N=NC0CCC)C[C@H1]1C2=CC(C(NC)=CC=C2C3=C(CC1)C=C(OC)C(OC)=C3OC)=O  
 PUGREST.BadRequest: error:  
CCCCC=1N2[C@H1]CC(C3=C(C(OC)=C(OC)C=C3C2=C)C=C)(SC)C(C=1)=O  
 PUGREST.BadRequest: error:  
C1C2(C3=C(OC)C(OC)=C(OC)C=C3CC[C@H1]1NC(N)C)C=CC=C(C(C2)=O)NC  
 PUGREST.BadRequest: error:  
C1C2(C3=C(OC)C(OC)=C(OC)C=C3CC[C@H1]1NC(N)=NC)C=C(C(=O)C2)NC  
 PUGREST.BadRequest: error:  
C1=2C(C3=C(OC)C(OC)=C(OC)C=C3CC[C@H1]1NC(C)CC)=CC=C(NC)C(=O)C=2NC  
 PUGREST.BadRequest: error:  
C12=C(C=CN(NC1)OC3=CC=C(NC)CC=C3[C@H1](NC(C)=O)CC)CC(OC)=C2OC=O  
 PUGREST.BadRequest: error:  
C1=C(CN[C@H1]2CCC3=CC(OC)=C(OC)C(OC)=C3C4=CC=C(NC)C(=O)C=C42)C=NC=C1  
 PUGREST.BadRequest: error:  
N(C1=CC=C(C=C1)C1)C=CN(OC=CC=CC=C)C=CC(N2C)=C(C(OC)=CC=CC=CC2C)[C@H1]SOC  
 PUGREST.BadRequest: error:  
C1[C@H1](NC(N=2)=N)CC(C3=C(C(OC)=C(OC)C=C3C1)OC)=CC=C(NC)C(C=2)=O  
 PUGREST.BadRequest: error:  
C1=C(C(C=C2[C@H1](CCC3=CC(OC)=C(OC)C(OC)=C3C2=C1)NC(C)C)=O)NC  
 PUGREST.BadRequest: error:  
N(C1=CC=C(C=C1)C1)C=CN(OC=CC=CC=C)C=CC(N2C)=C(C(OC)=CC=CC=CC2C)[C@H1]NOC=O  
 PUGREST.BadRequest: error:  
C12=C[C@H1](NC(N(C)C)=O)CCC3=CC(OC)=C(OC)C(OC)=C3C1=CC=C(NC)C2=O  
 PUGREST.BadRequest: error:  
C1=C(CN[C@H1]2CCC3=CC(OC)=C(OC)C(OC)=C3C4=CC=C(NC)C(=O)C=C42)C=NC=CC1  
 PUGREST.BadRequest: error:  
C=1C=C(NC)C(C=C2C=1C3=C(OC)C(OC)=C(OC)C=C3CC[C@H1]2NC(N(C)C)=O)SNC  
 PUGREST.BadRequest: error:  
C1CN[C@H1]2C3=CC(C(NC)=CC=C3C4=C(C(OC)=C(OC)C=C4CC2)OC=O)C=C1  
 PUGREST.BadRequest: error:  
N=1[C@H1]2C3=CCC(SC)=CC=C3C4=C(OC)C(OC)=C(C=C4CC2)OC=CC=1C  
 PUGREST.BadRequest: error:  
C1[C@H1](NC(NC2=CC=C(C=C2)F)=O)C3=CC(C(NC)=CC=C3C4=C(OC)C(OC)=CC=C4OCC1)=O  
 PUGREST.BadRequest: error:  
C=1C=C(NC)C(C=C2[C@H1](CCC3=CC(OC)=C(OC)C(OC)=C3C2=1)CCC=O)C  
 PUGREST.BadRequest: error:  
C=12C=C(NC)C2(C=C3C=1C4=C(OC)C(OC)=C(OC)C=C4CC[C@H1]3NC(N(CC)CC)=O)NC  
 PUGREST.BadRequest: error:  
C1=CC(=CC=N1)CCN[C@H1]2C3=CC(C(SC)=CC=C3C4=C(CC2)C=C(OC)C(OC)=C4OC)=O  
 PUGREST.BadRequest: error:



C=CC=C(NC(=O)C=CC=C1C2=C(OC)C(OC)=C(OC)C=C2CC[C@H]1(NC(C)=O)C1=C)SC=O  
PUGREST.BadRequest: error:  
N=NC(CNC(=O)OC)=C=C(CCO[C@H]1CCC1=CC(OC)=C(OC)C(OC)=C1C2=CC=CNC)C(=O)C=C2  
PUGREST.BadRequest: error:  
C1=2[C@H]1CCC3=CC(OC)=C(OC)C(OC)=C3C1=CC=C(C(=O)C=2)NCNC(C)=O  
PUGREST.BadRequest: error:  
CC=C1C2=C(C=C(OC)C(OC)=C2OC(CC)=O)C[C@H]1(NC(C)=O)C=CC(C(SC)=CC=C1)=O  
PUGREST.BadRequest: error:  
C1=2[C@H]1CCC3=CC(OC)=C(OC)C(OC)=C3C1=CC=C(C(C=2)=O)NCNC(C)=O  
PUGREST.BadRequest: error:  
C1[C@@H]1(CC(C2=C(C(OC)=C(OC)C=C2C1)OC)=CC=C(SC)C(C)=O)NC(C)=O  
PUGREST.BadRequest: error:  
CC1[C@H]1(NC(=O)NC2=CC=C(C(F)(F)F)C=C2C3=CCC(NC)=CC=C3C=C(OC)C(OC)=C(C=C1)OO)C  
PUGREST.BadRequest: error:  
C12C=CC3=C(C=C(OC)C(OC)=C3OC(C)=O)[C@H]1(NC(C)=O)C1=CC(C(SC)=C2)=O  
PUGREST.BadRequest: error:  
CC=CC1=C(C=C(OC)C(OC)=C1OC(OCC)=O)CC[C@H]1(NC(C)=O)C2=CC(C(SC)=CC=C2)=O  
PUGREST.BadRequest: error:  
C=CC=C(NC1CCC=CN=C(CC)CC=C1[C@H]1CCC2=CC(OC)=C(OC)C(OC)=C2)ONC  
PUGREST.BadRequest: error:  
C=CC=C(NC([C@@H]1C1=CCC(SC)=CC=C1C2=C(OC)C(OC)=C(OC)C=C2CC)=O)NC=O  
PUGREST.BadRequest: error:  
O=C1C=C2[C@H]1(CCC3=C(C(OC)=C(OC)C(OC)=C3)C2=CC=C1SC)NC(N(C(C)C)C(C1)=O)NC  
PUGREST.BadRequest: error:  
O=C1C=C2[C@H]1(CCC3=C(C(OC)=C(OC)C(OC)=C3)C2=CC=C1SC)NC(C(=O)OCC)=CNC  
PUGREST.BadRequest: error:  
N=NC(CNC(=O)OC)=C=C(C=CC=CNCC=CC1)C(OC)C(OC)=C(OC)C=C1CC[C@H]1(NC(=O)C)C=CC  
PUGREST.BadRequest: error:  
C1=C2CC[C@H]1(NC(N(C)C)=O)C3=CC(C(NC)=CC=C3C2=C(OC)C(OC)=C1OC)NC(C)=O  
PUGREST.BadRequest: error:  
O=C1C=C2[C@H]1(CCC3=C(C(OC)=C(OC)C(OC)=C3)C2=CC=C1SC)NC(C(C)C)=O  
PUGREST.BadRequest: error:  
N1=NC(COC(=O)C2=CC=NC=C2)=CN1NCC=CC3C4=CC=C(NC)CC=C4[C@H]1CCC3=CCNCOCC  
PUGREST.BadRequest: error:  
N1C=NN=NN1[C@H]12CCC3=C(C(OC)=C(OC)C(OC)=C3)C4=CC=C(C(C=C42)=O)NCCC  
PUGREST.BadRequest: error:  
CNCC(OC1=2)=C(OC)C=3CC([C@H]1(CCC=3C=C1OC)NC(N(C)C)=O)OC(=CC=2)NC=O  
PUGREST.BadRequest: error:  
CNC=1C(=O)C=C2[C@H]1(CCC3=CC(OC)=C(OC)C(OC)=C3C2=CC=1N)C(C(C)C)=O  
PUGREST.BadRequest: error:  
N=NC(CNC(=O)OC)=C=C(C=CC=CNCC=C1C)C2(NC)C(C(O)=CC2[C@H]1NC(C)=O)CCC1SCOCC  
PUGREST.BadRequest: error:  
O=CC(NC)=CC=C1C([C@H]1(CCC2=CC(OC)=C(OC)C(OC)=C21)N=[N+1])=[N-1]  
PUGREST.BadRequest: error:  
N([C@H]1CCC2=CC(OC)=C(OC)C(OC)=C2C3=CC=C(NC)C(C=C31)=O)CCCCF  
PUGREST.BadRequest: error:  
C[C@H]1(CCC1=CC(OC)=C(OC)C(OC)=C1C2=CC=C(C(C=C2)=O)SC)NC/C=C/C3=CC=CC=C3  
PUGREST.BadRequest: error:

O=CC(NC)=C1C2=CC([C@@H1](N=[N+1]=[N-1])CCC3=CC(OC)=C(OC)C(OC)=C32)NC=CC1  
 PUGREST.BadRequest: error:  
N([C@H1]1CCC2=C(C(OC)=C(OC)C(OC)=C2)C3=CC=C(SC)C(C=C31)=O)CCCC  
 PUGREST.BadRequest: error:  
O=CC(NC)=CC=CC1([C@H1](CCC2=CC(OC)=C(OC)C(OC)=C21)N=[N+1]=[N-1])O  
 PUGREST.BadRequest: error:  
C1NC(CNC(=O)OCCN=N1)CC2=CC(OC)=C(OC)C(OC)=C2C3=CC=C(NC)C(=O)C=C3  
 PUGREST.BadRequest: error:  
O=CC(NC)=CC=C1C([C@H1](CCC2=CC(OC)=C(OC)C(OC)=C21)N=[N+1]=[N-1])  
 PUGREST.BadRequest: error:  
C=CC=C(C(=O)OCC1=CN(N=N1)[C@H1]2CCC3=CC(OC)=C(OC)C(OC)=C3C4=CC=C(NC)CC=C24)O  
 PUGREST.BadRequest: error:  
C=CC1=C(C(=O)OC=CC=C2C3=C(OC)C(OC)=C(OC)C=C3CC[C@H1](NC(C)=O)C2=C1SC)C  
 PUGREST.BadRequest: error:  
C=C1C2=C(C=C(OC)C(OC)=C2OC(OCC)=O)CC[C@H1](NC(C)=O)C3=CC(C(NC)=CC=C13)=O  
 PUGREST.BadRequest: error:  
C=CC=CC(=O)OC1=C(C(OC)=CCCC[C@H1](NC(C)=O)C2=CC(C(SC)=CC=C21)=O)C  
 PUGREST.BadRequest: error:  
OCC(C1(C)OCN)=NN(C1)[C@H1]2C3=CC(C(NC)=CC=C3C4=C(CC2)C=C(OC)C(OC)=C4OC)=O  
 PUGREST.BadRequest: error:  
OCC(C1(C)OCN)=NN(C1)[C@H1]2C3=CC(C(NC)=CC=C3C4=C(OC)C(OC)=C(C=C4CC2)OC)=O  
 PUGREST.BadRequest: error:  
C1=2[C@H1](CCC3=C(C(OC)=C(OC)C(OC)=C3)C1=CC=C(C(C=2)=O)SCNCC)OC=C  
 PUGREST.BadRequest: error:  
CC=CC(N[C@H1]1CCC2=C(C(OC)=C(OC)C(OC)=C2)C3=CC=C(SC)C(C=C13)=O)CCOC  
 PUGREST.BadRequest: error:  
OC(=O)NCC1=CN(N=N1)[C@@H1]2C=3C(C4=C(C(OC)=C(OC)C=C4CC2)OC)=CC=C(NC)C(C=3)=O  
 PUGREST.BadRequest: error:  
O(C=C(OC=1)CC2=CC=C(NC)CC=C2[C@@H1](N3C(C(O)=O)=C(N=N3)C(O)=O)CCC=1C=COC=O)C  
 PUGREST.BadRequest: error:  
N(C)C=1C(=O)C=C2[C@H1](CCC3=C(C(OC)=C(OC)C(OC)=C3)C2=CC=1)N4C(C(=O)O)C=CN=C4NC  
 PUGREST.BadRequest: error:  
C1=C(OC)C(=C(OC)C=C1CC[C@H1](NC(C(=O)OCC)=C(COCC)OCCC(NC)=CC=CON)C=C)NC  
 PUGREST.BadRequest: error: N(C)C=1C(=O)C=C2[C@H1](CCC3=C(C(OC)=C(OC)C(OC)=C3)C2=CC=1)N4C(C(=O)O)C=CN=C4NC  
=CC=1)N4C(C(=O)O)=C(N=N4)C(=O)NNC  
 PUGREST.BadRequest: error: N1(C)C=2C(=O)C=C3[C@H1](CCC4=C(C(OC)=C(OC)C(OC)=C4)C3=CC=2)NC(C(=O)O5)C=CN=C5C=C1NC  
 PUGREST.BadRequest: error:  
C1[C@H1](NCC)CC2=CC(C(SC)=CC=C2C3=C(C(OC)=C(OC)C=C3CC1)OC(C)=O)CC=O  
 PUGREST.BadRequest: error:  
C12[C@H1](NCC)CC3=CC(C(SC)=CC=C3C4=C(C(OC)=C(OC)C=C4CC1)OC=C2NCC)=O  
 PUGREST.BadRequest: error:  
C=C(NC)C1C([C@H1](CCC2=CC(OC)=C(OC)C(OC)=C21)NC(NC3=CC=C(C=C3)F)=O)PNC=O  
 PUGREST.BadRequest: error:  
O(C1=C(OC=2)C=3CC([C@@H1](N4N=NC(C(O)=O)=C4CO)OCCC=2C=C1)OC=CCC(NC)=CC=3)OC  
 PUGREST.BadRequest: error: O=C(NC=C1C=C(C(F)(F)F)CC=C1)N[C@@H1]2C=3C(C4=C(C(OC)=C(OC)C=C4CC2)OC)=CC=C(NC)C(C=3)=O  
 PUGREST.BadRequest: error: O=C(C=C(C(OCC1)=O)N(N=N1)[C@@H1]2C=3C(C4=C(C(OC)=C(O

C)C=C4CC2)OC)=CC=C(NC)CC=3)OC0CC=CC=CO  
 PUGREST.BadRequest: error: 0=C(C=C(C(OC1)=O)N(N=N1)[C@H1]2C=3C(C4=C(C(OC)=C(O  
 C)C=C4CC2)OC)=CC=C(NC)CC=3)OC50CCCC5=0  
 PUGREST.BadRequest: error:  
 O=C(C=C(C(O)CCCCC)[C@H1]1CC)C2=C(C(OC)=C(OC)C(OC)=C2)C3=CC=C(NC)C(C=C31)=0  
 PUGREST.BadRequest: error: 0=C(C=C(C(O1)CCCCC1)CN=N)N[C@H1]2CCC3=CC(OC)=C(OC)C  
 (OC)=C3C=4C2=CC(C(NC)=CC=4)=0  
 PUGREST.BadRequest: error:  
 N([C@H1]1CCC2=C(C(OC)=C(OC)C(OC)=C2)C3=CC=C(NC)C(=O)C=C13)CNCC4=CC=C(C=C4)C=O  
 PUGREST.BadRequest: error: 0=C(C=C(C1)C1=CN(N=N1)C(=S)N[C@H1]2C=3C(C4=C(C(OC)=  
 C(OC)C=C4CC2)OC)=CC=C(NC)CC=3)OC(O)=O  
 PUGREST.BadRequest: error: 0=C(C=C(C1)C=CN([C@H1]1CCC2=C(C(OC)=C(OC)C(OC)=C2)C3  
 =CC=C(NC)C(C=C13)=O)OC(=O)CC)NC(OC4=CC=CC=C4)=O  
 PUGREST.BadRequest: error: 0=CC(=CC=C1C([C@H1](N2C(C(O)=O)=C(N=N2)C(O)=O)CCC3=  
 CC(OC)=C(OC)C(OC)=C31)=C)NC=O  
 PUGREST.BadRequest: error:  
 O=CC(=C1C=C2C[C@H1](CCC3=CC(OC)=C(OC)C(OC)=C32)NC(C(=O)OCC)=C(NCC)OON=C1)NC  
 PUGREST.BadRequest: error:  
 N=1C(=C(C(=O)O)NCCN=NN(C=1)[C@H1]2CCC3=CC(OC)=C(OC)C(OC)=C3C4=CC=C(NC)CC=C42)OC  
 PUGREST.BadRequest: error: NC(=CN/C(=NC(O)C=CCI)C1=CN(NC12)C=CC3=CC(NC)=CC(OC)=  
 C3C=CC(OC4)C(OC)=CC5=C4)C=CC=CC5S[C@H1]2NC  
 PUGREST.BadRequest: error: OC(\N[C@H1]1CCC2=CC(OC)=C(OC)C(OC)=C2C3=CC=C(C(=O)C=  
 C31)OC(=O)N)(C[C@H1])C4=CCC(OC)=C4CCO  
 PUGREST.BadRequest: error:  
 CNCC(O)(C1OC=CC=C1N=NNC)[C@H1]2C3=CC(C(NC)=CC=C3C4=C(OC)C(OC)=C(C=C4CC2)OC)=O  
 PUGREST.BadRequest: error:  
 O=C1C(=CC=C2C([C@H1](CCC3=CC(OC)=C(OC)C(OC)=C32)N4C(C(=O)OCC)=C(N=N4)CC1=O)N)C  
 PUGREST.BadRequest: error: 0=C1C(=CC=C2C([C@H1](N3C(C(=O)O)=C(C(O)=O)N=N3)CCC4=  
 =CC(OC)=C(OC)C(OC)=C42)=C1)NC=O  
 PUGREST.BadRequest: error: CNCC(O)(C1OC=CC=C1C=2N=NNC=2)[C@H1]3CCC4=CC(OC)=C(OC  
 )C(OC)=C4C5=CC=C(C(=O)C=C53)NC  
 PUGREST.BadRequest: error:  
 N=1C(=C(C(=O)O)NCCN=NN(C=1)[C@H1]2CCC3=CC(OC)=C(OC)C(OC)=C3C4=CC=C(NC)CC=C42)O  
 PUGREST.BadRequest: error: CC(C)(C)OC(=O)/N=C(/N[C@H1]1CCC2=C(C(OC)=C(OC)C(OC)=  
 C2)C3=CC=C(NC)C(C=C31)=O)NCOC(C)=O  
 PUGREST.BadRequest: error:  
 C1(=CC=C1NC0CC)C=2N=NN(C=2)[C@H1]3CCC4=CC(OC)=C(OC)C(OC)=C4C5=CC=C(NC)C(C=C53)=O  
 PUGREST.BadRequest: error: CC(C)(C)OC(=O)/N=C(/N[C@H1]1CCC2=C(C(OC)=C(OC)C(OC)=  
 C2)C3=CC=C(NC)C(C=C13)=O)NCOC(C)(F)F  
 PUGREST.BadRequest: error:  
 C1(OC(C=C(N1[C@H1]2CCC3=C(C(OC)=C(OC)C(OC)=C3)C4=CC=C(NC)C(C=C24)=O)CC)CC)=CO  
 PUGREST.BadRequest: error:  
 CC(C)(C)OC(=O)/N=C(/N[C@H1]1CCC2=C(C(OC)=C(OC)C(OC)=C2)C3=CC=C(NC)C(=O)C=C31)N=N  
 PUGREST.BadRequest: error:  
 N([C@H1]1CCC2=CC(OC)=C(OC)C(OC)=C2C3=CC=C(NC)CC=C13)=O  
 PUGREST.BadRequest: error:  
 O=C(CNC=C1C(C2=C(OC)C(OC)=C(OC)C=C2CC[C@H1]1NC=CC=C(OC)C(=O)CSC  
 PUGREST.BadRequest: error:

```
CNC(CNC(=O)OCCN[C@H]1)CCC2=CC(OC)=C(OC)C(OC)=C2C=3C1=CC(C(=CC=3)NC)=O
PUGREST.BadRequest: error:
C12=C3C(C4=C(OC)C(OC)=C(OC)C=C4CC[C@H]3NC(=O)N)=CC=C1NC=C2
```

```
[6]: compound = pcp.get_compounds(data_['AI_generated_SMILES'][2], 'smiles')
```

```
[7]: compound
```

```
[7]: [Compound()]
```

```
[8]: compound[0].cid
```

```
[9]: compound[0].canonical_smiles
```

```
[10]: data_.CID.unique()
```

```
[10]: array([          nan, 0.00000000e+00, 6.35135500e+06, 1.62648725e+08,
          1.64628185e+08, 1.62672356e+08])
```

```
[ ]:
```

```
[11]: len(data_.CID.unique())
```

```
[11]: 6
```

```
[12]: data_.to_excel('../Data/PubChemSearch_colchicine.xlsx')
```

```
[ ]:
```

# Notebook

December 19, 2023

## 1 File 46

```
[1]: import pubchempy as pcp
import pandas as pd
import warnings
warnings.filterwarnings("ignore")
```

```
[2]: df_search = pd.read_excel('../Data/Whole_report.xlsx')
```

```
[3]: data_ = pd.DataFrame(data=df_search['SMILES'])
zeros = [0 for i in range(len(data_))]
data_['CID'] = zeros
data_['PUBCHEM_SMILES'] = zeros
data_.head()
```

```
[3]:
```

|   | SMILES                                                         | CID | PUBCHEM_SMILES |
|---|----------------------------------------------------------------|-----|----------------|
| 0 | <chem>COC1=C2C3=CC=C(NC)C(=O)C=C3[C@H1](CCC2=CC(OC)=...</chem> | 0   | 0              |
| 1 | <chem>COC1=C2C3=CC=C(NC)C(=O)C=C3[C@H1](CCC2=CC(OC)=...</chem> | 0   | 0              |
| 2 | <chem>COC1=C2C3=CC=C(NC)C(=O)C=C3[C@H1](CCC2=CC(OC)=...</chem> | 0   | 0              |
| 3 | <chem>COC1=C2C3=CC=C(NC)C(=O)C=C3[C@H1](CCC2=CC(OC)=...</chem> | 0   | 0              |
| 4 | <chem>O=CC1=CN=NN1[C@H1]2CCC3=CC(OC)=C(OC)C(OC)=C3C4...</chem> | 0   | 0              |

```
[4]: len(data_)
```

```
[4]: 335
```

```
[5]: known_1 = []
for i, smiles in enumerate(data_['SMILES']):
    try:
        compound = pcp.get_compounds(smiles, 'smiles')
        data_['CID'][i] = compound[0].cid
        data_['PUBCHEM_SMILES'][i] = compound[0].canonical_smiles
        if math.isnan(data_['CID'][i]):
            data_['CID'][i] = 0
            data_['PUBCHEM_SMILES'][i] = 0
        else:
            pass
    known_1.append(compound)
```

```
except:
    print("PUGREST.BadRequest: error: ", smiles)
```

```
PUGREST.BadRequest: error:
COC1=C2C3=CC=C(NC)C(=O)C=C3[C@H1] (CCC2=CC(OC)=C1OC)NCCONC
PUGREST.BadRequest: error:
COC1=C2C3=CC=C(NC)C(=O)C=C3[C@H1] (CCC2=CC(OC)=C1OC)NCCCCC
PUGREST.BadRequest: error:
COC1=C2C3=CC=C(NC)C(=O)C=C3[C@H1] (CCC2=CC(OC)=C1OC)NCCCCC
PUGREST.BadRequest: error:
COC1=C2C3=CC=C(NC)C(=O)C=C3[C@H1] (CCC2=CC(OC)=C1OC)N4C=C(N=N4)CNCC
PUGREST.BadRequest: error:
O=CC1=CN=NN1[C@H1] 2CCC3=CC(OC)=C(OC)C(OC)=C3C4=CC=C(C(=O)C=C42)NCC
PUGREST.BadRequest: error:
OC1=CC=C(C=C1)CN[C@H1] 2CCC3=C(C(OC)=C(OC)C(OC)=C3)C4=CC=C(SC)C(=O)C=C24
PUGREST.BadRequest: error:
OC1=CC=C(C=C1)CN[C@H1] 2CCC3=CC(OC)=C(OC)C(OC)=C3C4=CC=C(C(C=C42)=O)SCC
PUGREST.BadRequest: error:
O=CC1=C2[C@H1] (CCC3=CC(OC)=C(OC)C(=C3C2=CC=C(SC)C1=O)OCC4=CC=CC=C4)ONC
PUGREST.BadRequest: error:
C1=2[C@H1] (CCC3=CC(OC)=C(OC)C(OC)=C3C1=CC=C(SC)C(=O)C=2)NC(C)CC=CSC
PUGREST.BadRequest: error:
C1N(C(=S)N[C@@H1] 2C3=CC(C(NC)=CC=C3C4=C(OC)C(OC)=C(OC)C=C4CC2)=O)C=C1
PUGREST.BadRequest: error:
C1=2[C@H1] (CCC3=CC(OC)=C(OC)C(OC)=C3C1=CC=C(C(C=2)=O)SCNC(C)=O)C
PUGREST.BadRequest: error:
C[C@H1] (CCC1=CC(OC)=C(OC)C(OC(OC)=O)=C1C2=CC=C(SC)C(=O)C=C2)NC
PUGREST.BadRequest: error:
COC1=C2C3=CC=C(NC)C(=O)C=C3[C@H1] (CCC2=CC(OC)=C1OC)NCCC4=CC=CC=C4
PUGREST.BadRequest: error:
COC1=C2C3=CC=C(NC)C(=O)C=C3[C@H1] (CCC2=CC(OC)=C1OC)NC/C=C/C4=CC=CC=C4
PUGREST.BadRequest: error:
CC(=O)N[C@H1] 1CCC2=CC(OC)=C(OC)C(OC)=C2C=3C1=CC(=O)C(SC)=CC=3N
PUGREST.BadRequest: error:
C1=2C(=O)C(=C3C=C1C4=C(CC[C@@H1] 3NC(C)=O)C=C(OC)C(OC)=C4OC(OC)=O)C=2
PUGREST.BadRequest: error:
CC(=O)OC1=CC=C2C3=C(C(OC)=C(C=C3CC[C@@H1] (C2=CC1=O)OC(=O)C)OC)NC(=O)C
PUGREST.BadRequest: error:
CC(=O)OC1=CC=C2C3=C(C(OC)=C(C=C3CC[C@@H1] (C2=CC1=O)OC(=O)C)OC)NC(=O)COC
PUGREST.BadRequest: error:
CC(=O)OC1=CC=C2C3=C(C(OC)=C(C=C3CC[C@@H1] (C2=CC1=O)OC(=O)C)OC)OC
PUGREST.BadRequest: error:
CC(C)C(OC1=CC=C2C3=C(CC[C@@H1] (C2=CC1=O)NC(C)=O)C=C(OC)C(OC)=C3OC)(O)C
PUGREST.BadRequest: error:
CC(=O)N[C@@H1] 1C2=CC(C(SC)=CC=C2C3=C(OC)C(=C(OC)C=C3CC1)OC(=O)C4=CC=CC=C4)=O
PUGREST.BadRequest: error:
O=C(OC)OC1=CC=C2C3=C(C(OC)=C(C=C3CC[C@@H1] (C2=CC1=O)NC(=O)C)OC)OC(=O)C
PUGREST.BadRequest: error:
```

O=C(C)N[C@H]1CCCC2=CC(=C(OC)C(=C2C=3C1=CC(C(SC)=CC=3)=O)OC(=O)CC)COC  
PUGREST.BadRequest: error:  
CC(=O)OCC1=CN(N=N1)[C@H]1CCCC3=CC(OC)=C(OC)C(OC)=C3C=4C2=CC(=O)C(NC)=CC=4C  
PUGREST.BadRequest: error:  
CC(=O)OCC1=CN(N=N1)[C@H]1CCCC3=CC(OC)=C(OC)C(=C3C=4C2=CC(C(NC)=CC=4)=O)OC  
PUGREST.BadRequest: error:  
CC(=O)N[C@@H]1C2=CC(C(NC)=CC=C2C3=C(OC)C(OC)=C(OC)C=C3C1)=O  
PUGREST.BadRequest: error:  
CC(=O)N[C@@H]1C1=C2C(C(NC)=CC=C1C3=C(OC)C(OC)=C(OC)C=C3CC2)=O  
PUGREST.BadRequest: error:  
COC1=C2C3=CC=C(NC)C(=O)C=C3[C@@H]1(NCCC)CCC2=CC(=C1OC)NC  
PUGREST.BadRequest: error:  
COC1=C2C3=CC=C(NC)C(=O)C=C3[C@H]1(CCC2=CC(OC)=C1OC)NN=NC=C  
PUGREST.BadRequest: error:  
COC1=C2C3=CC=C(NC)C(=O)C=C3[C@@H]1(NCCC)CCC2=CC(=C1OC)OSC  
PUGREST.BadRequest: error:  
COC1=C2C3=CC=C(NC)C(=O)C=C3[C@H]1(CCC2=CC(=C1OC)OC)NCCCS  
PUGREST.BadRequest: error:  
COC1=C(OC)C(OC)=CC=2CC[C@H]1(NC(=N)N)C3=CC(=O)C(=CC=C3C1=2)CNC  
PUGREST.BadRequest: error:  
CNC(NCCCC)=S[C@@H]1C1=CC(=O)C(NC)=CC=C1C2=C(C=C(OC)C(=C2OC)OC)CCF  
PUGREST.BadRequest: error:  
CN(C(=S)N[C@@H]1C2=CC(=O)C(NC)=CC=C2C3=C(C=C(OC)C(OC)=C3OC)CC1C)C#N  
PUGREST.BadRequest: error:  
CNC(C(C)C)N[C@@H]1C=2C(C3=C(C=C(OC)C(OC)=C3OC)CC1)=CC=C(C(=O)C=2)NC  
PUGREST.BadRequest: error:  
COC1=C(OC)C(OC)=CC=2CC[C@H]1(C3=CC(=O)C(NC)=CC=C3C=21)N4C=C(N=N4)CON  
PUGREST.BadRequest: error:  
COC1=C(OC)C(OC)=CC=2CC[C@H]1(C3=CC(=O)C(NC)=CC=C3C=21)NCCC4CCCCC4  
PUGREST.BadRequest: error:  
CC(C)(C)COC1=CC=C2C3=C(OC)C(OC)=C(OC)C=C3CC[C@H]1(C2=CC1=O)SC=O  
PUGREST.BadRequest: error:  
C1=2[C@H]1CCC3=CC(OC)=C(OC)C(OC(CC)=O)=C3C1=CC=C(C(C=2)=O)SCNC(=O)CSC  
PUGREST.BadRequest: error:  
OC(CCC(C)C)OCC1=CN(N=N1)[C@H]1CCCC3=CC(OC)=C(OC)C(OC)=C3C4=CC=C(NC)C(=O)C=C24  
PUGREST.BadRequest: error:  
OC1=C(C=CC=C1)C=2N=NN(C=2)[C@H]1CCCC4=CC(OC)=C(OC)C(OC)=C4C5=CC=C(NC)C(=O)C=C35  
PUGREST.BadRequest: error:  
NC1=CN(N=N1)[C@H]1CCCC3=C(C(OC)=C(OC)C(OC)=C3)C4=CC=C(NC)C(C=C24)=O  
PUGREST.BadRequest: error:  
O=C(OCC)CN(CCO)N[C@H]1CCCC2=CC(OC)=C(OC)C(OC)=C2C3=CC=C(NC)C(=O)C=C13  
PUGREST.BadRequest: error: O=C(C1=C(C(OCC)=O)N(N=N1)[C@@H]1C2=C3C(C(NC)=CC=C2C4=C(C(OC)=C(OC)C=C4CC3)OC)=O)O  
PUGREST.BadRequest: error:  
C1=2[C@H]1(CCC3=CC(OC)=C(OC)C(OC)=C3C1=CC=C(C(=O)C=2)NCO)C(C(OC)=O)NC(=O)CNC  
PUGREST.BadRequest: error:  
C=12N(N=NC=1C(OCC3=CC=C(C=C3)F)=O)C(OC)=C(OC)C(OC)=CC4=CC=C(C(=O)C=C24)NC  
PUGREST.BadRequest: error:

C=1N(N=NC=1C(=O)OCC2=CC=C(C=C2)F)CC(OC)=C(OC)C(OC)=CC3=CC=C(NC)C(=O)C=C3  
PUGREST.BadRequest: error:  
O=CC1=C(C(OC)=O)N(N=N1)[C@H1]C2=C3C(C(NC)=CC=C2C4=C(C(OC)=C(OC)C=C4CC3)OC)=O  
PUGREST.BadRequest: error:  
O=C(C(C1)C1)NC(=O)N[C@H1]1CCC2=C(C(OC)=C(OC)C(OC)=C2)C3=CC=C(NC)C(=O)C=C13  
PUGREST.BadRequest: error:  
O=C(C(C1)C1)NCC1=CN(N=N1)[C@H1]2CCC3=CC(OC)=C(OC)C(OC)=C3C4=CC=C(C(=O)C=C42)NCCO  
PUGREST.BadRequest: error: O=C(C(C1)C1)NC(=O)N[C@H1]1CCC2=C(C(OC)=C(OC)C(OC)=C2)C3=CC=C(C(C=C31)=O)NCC(=O)OC  
PUGREST.BadRequest: error:  
O=C(O)C=C(C(OC)=O)N=NN[C@H1]1CCC2=CC(OC)=C(OC)C(OC)=C2C3=CC=C(NC)C(=O)C=C13  
PUGREST.BadRequest: error:  
O=C(O)C1=C(C(OC)=O)N=NN1[C@H1]2CCC3=CC(OC)=C(OC)C(OC)=C3C4=CC=C(NC)C(=O)C=C24  
PUGREST.BadRequest: error:  
O=C(OC)C1=CN(N=N1)[C@H1]2CCC3=CC(OC)=C(OC)C(=C3C4=CC=C(NC)C(C=C42)=O)OCC  
PUGREST.BadRequest: error:  
O=C(O)C1=CN(N=N1)[C@H1]2CCC3=C(C(OC)=C(OC)C(OC)=C3)C4=CC=C(C(=O)C=C42)NCC  
PUGREST.BadRequest: error:  
O=C(O)C1=C(C(OC)=O)N=NN1[C@H1]CCC2=CC(OC)=C(OC)C(OC)=C2C3=CC=C(C(C=C3)=O)NC  
PUGREST.BadRequest: error: CCCCCCCCCCCCCCCC(OC1=CN(N=N1)[C@H1]C2CC3=CC(OC)=C(O)C(OC)=C3C4=CC=C(C(=O)C=C24)NC)=O  
PUGREST.BadRequest: error:  
OC(=O)C1=C(C(OC)=O)N(N=N1)[C@H1]C2CC3=CC(OC)=C(OC)C(OC)=C3C4=CC=C(NC)C(=O)C=C42  
PUGREST.BadRequest: error:  
C1=C(OC)C=C(OC)C=C1CC[C@H1](C=CC(C(OC(C2=CC=CC=C2)=O)=CC=CC)=O)C  
PUGREST.BadRequest: error: N(C)C(=O)NCCC(OC1=CN(N=N1)[C@H1]CCC2=CC(OC)=C(OC)C(OC)=C2C3=CC=C(C(=O)C=C3)N)C=O  
PUGREST.BadRequest: error:  
OC(=O)C=C(C(OC)=O)N(NCCC)N[C@H1]1CCC2=CC(OC)=C(OC)C(OC)=C2C3=CC=C(NC)C(=O)C=C31  
PUGREST.BadRequest: error:  
C[C@H1](NCC)CC1=CC(C(NC)=CC=C1C2=C(C=C(OC)C(OC)=C2OCC3=CC=CC=C3)OSCC)=O  
PUGREST.BadRequest: error: C=1C(C)(C)OC(=O)/N=C(/N[C@H1]2CCC3=C(C(OC)=C(OC)C(OC)=C3)C4=CC=C(NC)C(=O)C=C24)N=1  
PUGREST.BadRequest: error:  
N1=NN1[C@H1]2C3=CC(C(NC)=CC=C3C4=C(C(OC)=C(OC)C=C4CC2)OC)=O  
PUGREST.BadRequest: error:  
O=CC=CC=CC(NCC1=CN(N=N1)[C@H1]2CCC3=CC(OC)=C(OC)C(OC)=C3C4=CC=C(C(C=C24)=O)NC)=O  
PUGREST.BadRequest: error:  
CN(N([C@H1]1C2=CC(=O)C(NC)=CC=C2C3=CC(=C(OC)C=C3CC1)OC)O)CNC(=S)CCCC  
PUGREST.BadRequest: error:  
CC(C)C(=O)OCC1=CN(N=N1)[C@H1]2CCC3=CC(OC)=C(OC)C(OC)=C3C4=CC=C(NC)C(=O)C=C24  
PUGREST.BadRequest: error:  
N(C(C1=CC=NC=C1)=O)[C@H1]2C=3C(C4=C(C(OC)=C(OC)C=C4CC2)OC)=CC=C(SC)C(=O)C=3  
PUGREST.BadRequest: error:  
N1(CCCC1)CN[C@H1]2CCC3=C(C(OC)=C(OC)C(OC)=C3)C4=CC=C(SC)C(=O)C=C24  
PUGREST.BadRequest: error:  
N1(CCCC1)C(=O)OC2=C(OC)C(OC3)=CC=C2C4=CC=C(SC)C(C=C4[C@H1](NC(=O)C)CC3)=O  
PUGREST.BadRequest: error:



CNC=1C(=O)C=C2[C@H1](CCCC3=CC(OC)=C(OC)C(OC)=C3C2=CC=1)NC4(C(=O)O)C=CN=N4  
 PUGREST.BadRequest: error: CC(C)(C)OC(=O)NCCC(NCC=1N=NN(C=1)[C@H1]C2CC3=CC(OC)=C(OC)C(OC)=C3C4=CC=C(C(=O)C=C24)N)C=O  
 PUGREST.BadRequest: error:  
C1C(C)(C)OC/N=C(/N[C@H1]2CCC3=CC(OC)=C(OC)C(=C3C4=CC=C(NC)C(C=C42)=O)OC)N=N1  
 PUGREST.BadRequest: error: CC(C)(C)OCNCCC(=O)NCC1=CN(N=N1)[C@H1]2CCC3=CC(OC)=C(OC)C(OC)=C3C4=CC=C(C(C=C24)=O)NC=O  
 PUGREST.BadRequest: error:  
C1C(C)(C)OC/N=C(/N[C@H1]2CCC3=CC(OC)=C(OC)C(=C3C4=CC=C(NC)C(C=C42)=O)OC)N1C  
 PUGREST.BadRequest: error: CC(C)(C)OC(=O)NCCC(OC=1N=NN(C=1)[C@H1]C2CC3=CC(OC)=C(OC)C(OC)=C3C4=CC=C(C(C=C24)=O)NC=O  
 PUGREST.BadRequest: error: CC(C)(C)OC(=O)NCCC(NCC=1N=NN(C=1)[C@H1]2CCC3=CC(OC)=C(OC)C(OC)=C3C4=CC=C(C(C=C24)=O)N)C=O  
 PUGREST.BadRequest: error:  
CNCCC1=CC=C(C=C1)NC(=O)N[C@H1]2CCC3=CC(OC)=C(OC)C(OC)=C3C4=CC=C(C(C=C24)=O)NC=O  
 PUGREST.BadRequest: error: CNCC(C1=CC=C(C=C1)NC(=O)N[C@H1]2C3=CC(C(NC)=CC=C3C4=C(C(OC)=C(OC)C=C4CC2)OC)=O)OC  
 PUGREST.BadRequest: error:  
O=C(OC)OCC1=CN(N=N1)[C@H1]2CCC3=CC(OC)=C(OC)C(OC)=C3C4=CC=C(NC)C(=O)C=C24  
 PUGREST.BadRequest: error:  
O=C(C(C)C)NC(=S)N[C@H1]1C=2C(C3=C(C(OC)=C(OC)C=C3CC1)OC)=CC=C(NC)C(=O)C=2  
 PUGREST.BadRequest: error:  
O=C(OC)OCC=1N=NN(C=1)[C@H1]2CCC3=CC(OC)=C(OC)C(OC)=C3C4=CC=C(NC)C(=O)C=C24  
 PUGREST.BadRequest: error:  
O=C(OC)CN(CCO)C(=S)N[C@H1]1CCC2=CC(OC)=C(OC)C(OC)=C2C3=CC=C(NC)C(=O)C=C13  
 PUGREST.BadRequest: error:  
CC(C)CNCC1=CN(N=N1)[C@H1]2CCC3=CC(OC)=C(OC)C(OC)=C3C4=CC=C(C(C=C24)=O)NC=O  
 PUGREST.BadRequest: error:  
CC(C)CNCC1=CN(N=N1)[C@H1]2CCC3=CC(OC)=C(OC)C(OC)=C3C4=CC=C(NC)C(=O)C=C24  
 PUGREST.BadRequest: error:  
COCNCC1=CN(N=N1)[C@H1]2CCC3=CC(OC)=C(OC)C(OC)=C3C4=CC=C(C(C=C42)=O)NC=O  
 PUGREST.BadRequest: error:  
N(C(C)C)C(NCC1=CN(N=N1)[C@H1]2CCC3=CC(OC)=C(OC)C(OC)=C3C4=CC=C(NC)C(=O)C=C24)=O  
 PUGREST.BadRequest: error:  
N(C)C1=CC=C2C3=C(OC)C(OC)=C(OC)C=C3CC[C@H1](C2=CC1=O)NC(C(=O)O)CCON=CCF  
 PUGREST.BadRequest: error:  
N(C(C(C)C)=O)C1=CN(N=N1)[C@H1]2CCC3=C(C(OC)=C(OC)C(OC)=C3)C4=CC=C(NC)C(=O)C=C24  
 PUGREST.BadRequest: error:  
N(CCCCCC=O)CC1=CN(N=N1)[C@H1]2CCC3=CC(OC)=C(OC)C(OC)=C3C4=CC=C(NC)C(=O)C=C24  
 PUGREST.BadRequest: error: C1=C(C=CC(C1)=C1)COC(=O)CN[C@H1]2C=3C(C4=C(C(OC)=C(OC)C=C4CC2)OC)=CC=C(SC)C(=O)C=3  
 PUGREST.BadRequest: error:  
N(C)C1=CC=C2C3=C(OC)C(OC)=C(OC)C=C3CC[C@H1](C2=CC1=O)NC(C(=O)O)CCONC(=O)C=C  
 PUGREST.BadRequest: error:  
N(C)C1=CC=C2C3=C(OC)C(OC)=C(OC)C=C3CC[C@H1](C2=CC1=O)NC(C(=O)O)CCONC(=O)CNC  
 PUGREST.BadRequest: error:  
N(C(C)C)CC(=O)OCC1=C2N(N=N1)[C@H1]CCC3=CC(OC)=C(OC)C(OC)=C3C4=CC=C(NC)C(C=C24)=O  
 PUGREST.BadRequest: error:

CC(CC)N[C@@H]1C2=CC(C(SC)=CC=C2C3=C(OC)C(OC)=C(C=C3CC1)OC)=O  
 PUGREST.BadRequest: error:  
CC(CC)N[C@@H]1C1=C2C(C(NC)=CC=C1C3=C(OC)C(OC)=C(OC)C=C3CC2)=O  
 PUGREST.BadRequest: error:  
COC1=C2C3=CC=C(NC)C(=O)C=C3[C@H]1(CCC2=CC(OC)=C1OC)NCC4=CC=NS4C  
 PUGREST.BadRequest: error:  
N(C)C=1C(=O)C=C2[C@H]1(CCC3=CC(OC)=C(OC)C(OC)=C3C2=CC=1N)C(C)CCSC  
 PUGREST.BadRequest: error:  
CNC=1C(C=C2[C@H]1(CCC3=C(C(OC)=C(OC)C(OC)=C3)C2=CC=1)NC(C)C)=O  
 PUGREST.BadRequest: error:  
NN([C@H]1CCC2=CC(OC)=C(OC)C(OC)=C2C3=CC=C(NC)C(=O)C=C13)C=O  
 PUGREST.BadRequest: error:  
OCCN(CC=C)C(=O)N[C@@H]1C2=CC(C(NC)=CC=C2C3=C(OC)C(OC)=C(OC)C=C3CC1)=O  
 PUGREST.BadRequest: error:  
OCCN(CC=C)C(=S)N[C@H]1CCC2=CC(OC)=C(OC)C(OC)=C2C3=CC=C(NC)C(=O)C=C13  
 PUGREST.BadRequest: error:  
CNC(N(C)C)CN[C@H]1CCC2=CC(OC)=C(C(OC)=C2C=3C1=CC(=O)C(=CC=3)NC)OC  
 PUGREST.BadRequest: error:  
NC(N(CC)OC)N[C@H]1CCC2=CC(OC)=C(OC)C(OC)=C2C=3C1=CC(=O)C(=CC=3)NC  
 PUGREST.BadRequest: error:  
C1=2[C@H]1(CCC3=CC(OC)=C(OC)C(OC)=C3C1=CC=C(SC)C(=O)C=2NC)C  
 PUGREST.BadRequest: error:  
C1=2[C@H]1(CCC3=CC(OC)=C(OC)C(OC)=C3C1=CC=C(C(C=2)=O)SCN)C(=O)C  
 PUGREST.BadRequest: error:  
NC(=O)N[C@@H]1C1=C2C(C(NC)=CC=C1C3=C(OC)C(OC)=C(OC)C=C3CC2)=O  
 PUGREST.BadRequest: error:  
CC(C)NC(=O)N1[C@@H]1C2=CC(C(NC)=CC=C2C3=C(OC)C(OC)=C(OC)C=C3CC1)=O  
 PUGREST.BadRequest: error:  
CC(N)(CCO)[C@H]1CCC2=CC(OC)=C(OC)C(OC)=C2C3=CC=C(SC)C(=O)C=C13  
 PUGREST.BadRequest: error:  
CC(N)(CCO)[C@H]1CCC2=CC(OC)=C(OC)C(OC)=C2C3=CC=C(C(C=C31)=O)NCC  
 PUGREST.BadRequest: error:  
C1[C@H]1(NC(C)=O)C2=CC(C(NC)=CC=C2C3=C(OC)C(OC)=C(C=C3C1)OCNC)=O  
 PUGREST.BadRequest: error:  
C1[C@H]1(NC(C)=O)C2=CC(C(SC)=CC=C2C3=C(OC)C(OC)=C(C=C3C1)OCNC)=O  
 PUGREST.BadRequest: error:  
C=C(N[C@H]1CCC2=C(C(OC)=C(OC)C(OC)=C2)C3=CC=C(SC)C(C=C31)=O)C  
 PUGREST.BadRequest: error:  
CC(C)N(C(C)C)C(=O)N[C@@H]1C1=CC(C(NC)=CC=C1C2=C(OC)C(OC)=C(OC)C=C2CC)=O  
 PUGREST.BadRequest: error:  
C1C(C)NC1N[C@H]1CCCC3=CC(OC)=C(OC)C(OC)=C3C4=CC=C(C(=O)C=C42)NC=O  
 PUGREST.BadRequest: error:  
O=C(N[C@H]1CCC2=CC(OC)=C(OC)C(OC)=C2C3=CC=C(NC)C(=O)C=C31)N(S)CC  
 PUGREST.BadRequest: error:  
O=C(N[C@H]1CCC2=CC(OC)=C(OC)C(OC)=C2C3=CC=C(NC)C(=O)C=C13)CCOCC  
 PUGREST.BadRequest: error:  
COC1=C2C3=CC=C(NC)C(=O)C=C3[C@H]1(CCC2=CC(OC)=C1OC)NC(=O)N(CCCCC1)O  
 PUGREST.BadRequest: error:

COC=CC1=CC=C(NC)C(=O)C=C1[C@@H1](NC(=S)NC2=CC=CC=C2)C1  
 PUGREST.BadRequest: error:  
N=1C(=CN(N=1)[C@H1]2CCC3=CC(OC)=C(OC)C(OC)=C3C4=CC=C(NC)C(=O)C=C42)C=O  
 PUGREST.BadRequest: error:  
C1=2[C@H1]CCC3=CC(OC)=C(OC)C(OC)=C3C1=CC=C(C(C=2)=O)SCNC(C)=O  
 PUGREST.BadRequest: error:  
N1([C@H1]2CCC3=C(C(OC)=C(OC)C(OC)=C3)C4=CC=C(NC)C(C=C24)=O)C=C1I  
 PUGREST.BadRequest: error:  
N1([C@H1]2CCC3=C(C(OC)=C(OC)C(OC)=C3)C4=CC=C(NC)C(C=C24)=O)C=C1OCC  
 PUGREST.BadRequest: error:  
N1C(OC)=C(C=C1)N[C@H1]2CCC3=C(C(OC)=C(OC)C(OC)=C3)C4=CC=C(SC)C(C=C42)=O  
 PUGREST.BadRequest: error:  
N(C(C)C)(C(C)C)C(=O)N1[C@H1]CCC2=C(C(OC)=C(OC)C(OC)=C2)C3=CC=C(NC)C(C=C31)=O  
 PUGREST.BadRequest: error:  
N(CCCC)CC1=CN(N=N1)[C@H1]2CCC3=CC(OC)=C(OC)C(OC)=C3C4=CC=C(NC)C(=O)C=C24  
 PUGREST.BadRequest: error:  
NC(=S)N1[C@@H1]C2=CC(C(NC)=CC=C2C3=C(OC)C(OC)=C(OC)C=C3CC1)=O  
 PUGREST.BadRequest: error:  
C=C(CN[C@H1]1CCC2=CC(OC)=C(OC)C(OC)=C2C3=CC=C(NC)C(C=C13)=O)C=O  
 PUGREST.BadRequest: error:  
C1=C(N=NN1[C@H1]2CCC3=CC(OC)=C(OC)C(OC)=C3C4=CC=C(NC)C(=O)C=C24)C  
 PUGREST.BadRequest: error:  
C=CC=C(NC(=O)N[C@H1]1CCC2=CC(OC)=C(OC)C(OC)=C2C3=CC=C(NC)C(=O)C=C13)C  
 PUGREST.BadRequest: error:  
C[C@H1](CCC1=CC(OC)=C(OC)C(OC(OC)=O)=C1C2=CC=C(SC)C(=O)C=C2)NCC  
 PUGREST.BadRequest: error:  
COCC(CN[C@@H1]1C=2C(C3=C(C(OC)=C(OC)C=C3CC1)OC)=CC=C(NC)C(C=2)=O)F  
 PUGREST.BadRequest: error:  
NC1=NN=NN1[C@@H1]2C=3C(C4=C(C(OC)=C(OC)C=C4CC2)OC)=CC=C(NC)C(C=3)=O  
 PUGREST.BadRequest: error:  
OCCN(CCO)C(=S)N1[C@@H1]C2=CC(C(NC)=CC=C2C3=C(OC)C(OC)=C(OC)C=C3CC1)=O  
 PUGREST.BadRequest: error:  
NC(C(OC)=C)N[C@H1]1CCC2=CC(OC)=C(OC)C(OC)=C2C3=CC=C(NC)C(=O)C=C31  
 PUGREST.BadRequest: error:  
N([C@H1]1CCC2=CC(OC)=C(OC)C(OC)=C2C3=CC=C(NC)C(C=C13)=O)=N  
 PUGREST.BadRequest: error:  
NC(CCC)N[C@@H1]1C2=CC(C(NC)=CC=C2C3=C(OC)C(OC)=C(OC)C=C3CC1)=O  
 PUGREST.BadRequest: error:  
N([C@H1]1CCC2=CC(OC)=C(OC)C(OC)=C2C3=CC=C(NC)C(C=C31)=O)=C  
 PUGREST.BadRequest: error:  
N([C@H1]1CCC2=CC(OC)=C(OC)C(OC)=C2C3=CC=C(NC)C(C=C13)=O)=CC  
 PUGREST.BadRequest: error:  
C1=2[C@H1](CCC3=C(C(OC)=C(OC)C(OC)=C3)C1=CC=C(C(C=2)=O)NCNCC(C)C)ONC  
 PUGREST.BadRequest: error: N(C)C=1C(=O)C=C2[C@H1](CCC3=C(C(OC)=C(OC)C(OC)=C3)C2=CC=1)N4C(C(=O)O)=C(N=N4)C(=O)N  
 PUGREST.BadRequest: error:  
N(CCCC)CNCC1=CN(N=N1)[C@H1]2CCC3=CC(OC)=C(OC)C(OC)=C3C4=CC=C(NC)C(=O)C=C24  
 PUGREST.BadRequest: error:

N(C)C=1C(=O)C=C2[C@H1](CCC3=C(C(OC)=C(OC)C(OC)=C3)C2=CC=1)NC(C(=O)O)=C(COCC)C=O  
 PUGREST.BadRequest: error:  
OC(\N[C@H1]1CCC2=CC(OC)=C(OC)C(OC)=C2C3=CC=C(C(C=C31)=O)NCNC(C)C)=O  
 PUGREST.BadRequest: error: N1=CC=C(C=C1)C(NCC=2N=NN(C=2)[C@H1]3CCC4=CC(OC)=C(OC)C(OC)=C4C5=CC=C(C(C=C53)=O)N)C=O  
 PUGREST.BadRequest: error:  
OCC(C)=C1C([C@H1](CCC2=CC(OC)=C(OC)C(OC)=C12)NC(NC3=CC=C(C=C3)F)=O)PNC=O  
 PUGREST.BadRequest: error: N1=CC=C(C=C1)C(NCC=2N=NN(C=2)[C@H1]3C4=CCC(NC)=CC=C4C5=C(OC)C(OC)=C(OC)C=C5CC3)=O  
 PUGREST.BadRequest: error:  
CC(C)(C)OC(=O)/N=C(/N[C@H1]1CCC2=C(C(OC)=C(OC)C(OC)=C2)C3=CC=C(NC)C(C=C13)=O)N=N  
 PUGREST.BadRequest: error: CC(C)(C)OC(=O)NCCCNC1=CN(N=N1)[C@H1]2CCC3=CC(OC)=C(OC)C(OC)=C3C4=CC=C(NC)C(=O)C=C42  
 PUGREST.BadRequest: error:  
COC1=C2C3=CC=C(NC)C(=O)C=C3[C@H1](CCC2=CC(OC)=C1OC)NCCCCCSC  
 PUGREST.BadRequest: error:  
C=C(CO)CN[C@H1]1CCC2=CC(OC)=C(OC)C(OC)=C2C3=CC=C(SC)C(=O)C=C31  
 PUGREST.BadRequest: error:  
CC(C)CN[C@H1]1CCC2=CC(OC)=C(OC)C(OC)=C2C3=CC=C(C(C=C31)=O)SCC  
 PUGREST.BadRequest: error:  
CC(C)CCN[C@H1]1CCC2=CC(OC)=C(OC)C(OC)=C2C3=CC=C(C(C=C13)=O)SCC  
 PUGREST.BadRequest: error:  
CC(C)CCN[C@H1]C1CC2=CC(OC)=C(OC)C(OC)=C2C3=CC=C(SC)C(C=C31)=O  
 PUGREST.BadRequest: error:  
N=1NC=1[C@H1]2C3=CC(C(NC)=CC=C3C4=C(C=C(OC)C(=C4OC)OC)CC2)=O  
 PUGREST.BadRequest: error:  
COC1=C2C3=CC=C(NC)C(=O)C=C3[C@H1](CCC2=CC(OC)=C1OC)NCC(C)C  
 PUGREST.BadRequest: error:  
COC1=C(OC)C(OC)=CC=2CC[C@H1](C3=CC(C(=CC=C3C1=2)SC)=O)NCCC(C)CC  
 PUGREST.BadRequest: error:  
C12=CC(C(NC)=CC=C1C3=C(C=C(OC)C(OC)=C3OC)CC[C@H1]2NCC=4SC=CC=4OC)=O  
 PUGREST.BadRequest: error:  
O=CC1=CN=NN1[C@H1]2CCC3=CC(OC)=C(OC)C(OC)=C3C4=CC=C(C(C=C24)=O)NCCC  
 PUGREST.BadRequest: error:  
C1=CN=CC=C1CN[C@H1]2CCC3=CC(OC)=C(OC)C(OC)=C3C4=CC=C(C(C=C42)=O)SCC(=O)C  
 PUGREST.BadRequest: error:  
C1=CN=CC=C1CN[C@H1]2CCC3=CC(OC)=C(OC)C(OC)=C3C4=CC=C(C(C=C42)=O)SCC  
 PUGREST.BadRequest: error:  
C=C1N=CC(C)N1CN[C@H1]2CCC3=C(C(OC)=C(OC)C(OC)=C3)C4=CC=C(C(C=C24)=O)NC  
 PUGREST.BadRequest: error:  
CNCC(C)OC(=O)N[C@H1]1CCC2=C(C(OC)=C(OC)C(OC)=C2)C3=CC=C(C(=O)C=C31)NCF  
 PUGREST.BadRequest: error:  
C=CC=C(CCN[C@H1]1CCC2=CC(OC)=C(OC)C(OC)=C2C3=CC=C(SC)C(C=C31)=O)OC  
 PUGREST.BadRequest: error:  
C1COC1(OC2=CC=C3C4=C(OC)C(OC)=C(OC)C=C4CC[C@H1](C3=CC2=O)SC(C)=O)SC  
 PUGREST.BadRequest: error:  
O=C(OC1=C2C(CC[C@H1](NC(=O)C)C3=CC(C(SC)=CC=C32)=O)=CC(OC)=C1OC)SCC  
 PUGREST.BadRequest: error:

O=C1C=CC=C2C([C@H1](CCC3=CC(OC)=C(OC)C(OC)=C32)NC(C)=O)=C1SC  
 PUGREST.BadRequest: error:  
C1=CC=C(C=C1)CN[C@H1]2CCC3=CC(OC)=C(OC)C(OC)=C3C4=CC=C(C(C=C42)=O)SCC  
 PUGREST.BadRequest: error:  
CC=CCCCN[C@H1]1CCC2=CC(OC)=C(OC)C(OC)=C2C3=CC=C(SC)C(C=C13)=O  
 PUGREST.BadRequest: error:  
OC1=C(C=CC=C1)CN2[C@H1]CCC3=CC(OC)=C(OC)C(OC)=C3C4=CC=C(SC)C(C=C24)=O  
 PUGREST.BadRequest: error:  
COC1=C2C3=CC=C(NC)C(=O)C=C3[C@H1](CCC2=CC(OC)=C1OC)NCCCCCCCCSC  
 PUGREST.BadRequest: error:  
COC1=CC=2CC[C@@H1](C=3C(C=2C(=C1OC)OC)=CC=C(NC)C(=O)C=3)NC(=O)CNC  
 PUGREST.BadRequest: error:  
CSC1=CC=C2C(=CC1=O)[C@H1](CCC3=CC(OC)=C(OC)C(=C23)O)CNC(=O)C  
 PUGREST.BadRequest: error:  
C1=C2[C@H1](CCC3=C(C(OC)=C(C(=C3)OC)OC)C2=CC=C(C1=O)NC)NC  
 PUGREST.BadRequest: error:  
CC(=O)OC1=CC=C2C3=C(C(OC)=C(C=C3CC[C@@H1](C2=CC1=O)NC(=O)CO)CO)C  
 PUGREST.BadRequest: error:  
CC(=O)OC=1C(=O)C=C2C(=CC=1)C3=C(OC)C(OC)=C(C=C3CC[C@@H1]2NC(C)=O)C(=O)C  
 PUGREST.BadRequest: error:  
CC(=O)OC1=CC=C2C3=C(C(OC)=C(C=C3CC[C@@H1](C2=CC1=O)NC(=O)C)OC)OC(=O)C  
 PUGREST.BadRequest: error:  
CCC(=O)OC1=CC=C2C3=C(C(OC)=C(C=C3CC[C@@H1](C2=CC1=O)OC(=O)C)OC)OC  
 PUGREST.BadRequest: error:  
CCC(=O)N[C@H1]1CCC2=CC(=C(OC)C(OC)=C2C=3C1=CC(=O)C(=CC=3)OC(OC)=O)OC  
 PUGREST.BadRequest: error:  
CC(C)C(OC1=CC=C2C3=C(CC[C@@H1](C2=CC1=O)NC(C)=O)C=C(OC)C(OC)=C3OC)(O)C=O  
 PUGREST.BadRequest: error:  
CC(C)C(OC1=CC=C2C3=C(CC[C@@H1](C2=CC1=O)NC(C)=O)C=C(OC)C(OC)=C3OC=O)C  
 PUGREST.BadRequest: error:  
CC(C)C(=O)OC1=CC=C2C3=C(C(OC)=C(C=C3CC[C@@H1](C2=CC1=O)NC(C)=O)OC)OC(=O)C  
 PUGREST.BadRequest: error:  
CC(C)C(OC1=CC=C2C3=C(C=C(OC)C(OC)=C3OC)CC[C@@H1](C2=CC1=O)NC(=O)CC)(O)C  
 PUGREST.BadRequest: error:  
CC(=O)OCC1=CN(N=N1)[C@H1]2CCC3=CC(OC)=C(OC)C(OC)=C3C=4C2=CC(=O)C(=CC=4)NCC  
 PUGREST.BadRequest: error:  
C1=C(C2=C(OC)C(OC)=C1OC(=O)CCC)C[C@@H1](C3=CC(=O)C(SC)=CC=C32)NC(C)=O  
 PUGREST.BadRequest: error:  
CC(=O)N[C@H1]1CCC2=CC(OC)=C(OC)C(=C2C3=CC=C(C(C=C31)=O)OCC4=CC=CC=C4)OOC  
 PUGREST.BadRequest: error:  
O=C(C)N[C@H1]1CCC2=CC(=C(OC)C(=C2C=3C1=CC(C(=CC=3)OC(=O)OC)=O)CN)C(=O)COCC  
 PUGREST.BadRequest: error:  
C=12C(=O)C(=CC=C3C=1[C@H1](CCC4=CC(OC)=C(OC)C(OC)=C34)NC(C)=O)C2  
 PUGREST.BadRequest: error:  
CCC(=O)N[C@H1]1CCC2=C(C(OC)=C(C(OC)=C2)OC)C=3C1=CC(C(SC)=CC=3)=O  
 PUGREST.BadRequest: error:  
CCC(=O)N[C@H1]1CCC2=CC(OC)=C(C(OC)=C2C=3C1=CC(=O)C(=CC=3)SC)OC(=O)OCC  
 PUGREST.BadRequest: error:

CC=1C(=CC(C(=CC=1)SC)=O)[C@H1](CCC2=CC(OC)=C(OC)C(=C2)OC)NC(=O)C  
 PUGREST.BadRequest: error:  
CC(C)COCCN[C@H1]1CCC2=CC(OC)=C(C(=C2C=3C1=CC(C(=CC=3)SC)=O)OC)OC(=O)C  
 PUGREST.BadRequest: error:  
CC(C)CCN[C@H1]1CCC2=C(C3=CC=C(SC)C(C=C31)=O)C(=C(C(OC)=C2)OC)OCCC  
 PUGREST.BadRequest: error:  
CC(C)CCN[C@H1]1CCC2=C(C3=CC=C(SC)C(C=C31)=O)C(=C(C(OC)=C2)OC)OC(=O)C  
 PUGREST.BadRequest: error:  
C1=C(OC)C(=C(OC)C2=C1CC[C@H1](NC(=O)C)C=3C2=CC=C(OC(=O)OC)C(C=3)=O)C  
 PUGREST.BadRequest: error:  
O=C(C)N[C@H1]1CCC2=CC(OC)=C(C(OC)=C2C3=CC=C(C(=O)C=C13)OCCC)OOC  
 PUGREST.BadRequest: error:  
O=C(N(C)C)NC1=CC=C2C3=C(OC)C(=C(OC)C=C3CC[C@@H1](C2=CC1=O)NCC)OOC  
 PUGREST.BadRequest: error:  
O=C(N)N[C@H1]1CCC2=CC(OC)=C(C(OC)=C2C=3C1=CC(C(OC(=O)C)=CC=3)=O)OC  
 PUGREST.BadRequest: error:  
O=C(C)N[C@H1]1CCC2=CC(OC)=C(C(OC)=C2C3=CC=C(C(=O)C=C31)OC(=O)O)CCOC  
 PUGREST.BadRequest: error:  
CC(=O)N1[C@H1]CCC2=CC(OC)=C(OC)C(OC)=C2C3=CC=C(NC)C(C=C31)=O  
 PUGREST.BadRequest: error:  
COC1=C2C3=CC=C(NC)C(=O)C=C3[C@H1](CCC2=CC(OC)=C1OC)NO  
 PUGREST.BadRequest: error:  
C1[C@@H1](C2=CC(=O)C(NC)=CC=C2C3=C(C=C(OC)C(=C3OC)OC)C1)NCCSC  
 PUGREST.BadRequest: error:  
CNC(C(C)O)N([C@H1]1CCC2=CC(=C(OC)C(OC)=C2C=3C1=CC(=O)C(=CC=3)NC)OCC)C  
 PUGREST.BadRequest: error:  
CNC(C(C)O)N[C@@H1]1C=2C(C3=C(C=C(OC)C(OC)=C3OC)CC1)=CC=C(C(=O)C=2)NC  
 PUGREST.BadRequest: error:  
CNC(=S)N[C@@H1]1C2=CC(=O)C(NC)=CC=C2C3=C(OC)C(=C(C=C3CC1)OC)OCO  
 PUGREST.BadRequest: error:  
N([C@H1]1CCC2=C(C3=CC=C(C(C=C13)=O)NC)C(OC)=C(OC)C(OC)=C2)N=N  
 PUGREST.BadRequest: error:  
C12=CC(C(NC)=CC=C1C3=C(C=C(C(OC)=C3OC)OC)CC[C@@H1]2NCCCCCCCCCF)=O  
 PUGREST.BadRequest: error:  
COC1=C(OC)C(OC)=CC=2CC[C@@H1](C3=CC(=O)C(NC)=CC=C3C=21)NCCC4=CC=CC=C4NC  
 PUGREST.BadRequest: error:  
COC1=C(OC)C(OC)=CC=2CC[C@@H1](C3=CC(=O)C(NC)=CC=C3C=21)N4C=C(N=N4)CCONC  
 PUGREST.BadRequest: error:  
CN(C(=S)N[C@@H1]1C2=CC(=O)C(NC)=CC=C2C3=C(C(=C(OC)C=C3CC1)OC)OC)CC#N  
 PUGREST.BadRequest: error:  
CC(C)(C)OC1=CN(N=N1)[C@H1]C2CC3=CC(OC)=C(OC)C(OC)=C3C4=CC=C(NC)C(=O)C=C42  
 PUGREST.BadRequest: error:  
CC(C)CCCCCN[C@@H1]1C2=CC(C(SC)=CC=C2C3=C(C(OC)=C(OC)C=C3CC1)OC)=O  
 PUGREST.BadRequest: error:  
CC(C)(C)C(=O)N[C@@H1]1C=2C(C3=C(C(OC)=C(OC)C=C3CC1)OC)=CC=C(NC)C(=O)C=2  
 PUGREST.BadRequest: error:  
OC(CCC(C)C)OCC1=CN(N=N1)[C@H1]CCC2=CC(OC)=C(OC)C(OC)=C2C3=CC=C(C(=O)C=C3)NC  
 PUGREST.BadRequest: error:



C1=CN=CC=C1C2=CN(N=N2)[C@H1]3CCC4=C(C(OC)=C(OC)C(OC)=C4)C5=CC=C(C(=O)C=C35)NCO  
 PUGREST.BadRequest: error:  
COC=C(OC)C(OC)=CCCC[C@H1](N1C=C(N=N1)COC(=O)C2=CC=NC=C2)C3=CC(=O)C(=CC=C3CNCN)C  
 PUGREST.BadRequest: error:  
COC1=C(OC)C=CC=2CC[C@@H1](C3=CC(=O)C(NC)=CC=C3C1=2)N4C=C(N=N4)COC5=CC=CC=C5OC  
 PUGREST.BadRequest: error:  
CC(C)(O)C=CN([C@H1]1CCC2=CC(OC)=C(OC)C(OC)=C2C3=CC=C(C(C=C13)=O)NC)O  
 PUGREST.BadRequest: error:  
C=12C(=CC(C(NC)=CC=1)=O)[C@H1](CCC3=CC(OC)=C(OC)C(=C32)OC)C(C)C=O  
 PUGREST.BadRequest: error:  
NC(=O)NCC1=CN(N=N1)[C@H1]2CCC3=CC(OC)=C(OC)C(OC)=C3C4=CC=C(NC)C(=O)C=C24  
 PUGREST.BadRequest: error:  
C1=CC(OC)=CC=C1CN[C@H1]2CCC3=C(C(OC)=C(OC)C(OC)=C3)C=4C2=CC(C(=CC=4)NC)=O  
 PUGREST.BadRequest: error:  
N(C(C1=CC=CC=C1)=O)CCN[C@H1]2CCC3=CC(OC)=C(OC)C(OC)=C3C4=CC=C(C(C=C24)=O)SC  
 PUGREST.BadRequest: error:  
N=NC(=C(C(OC)=O)N[C@H1]1CCC2=CC(OC)=C(OC)C(OC)=C2C3=CC=C(C(C=C13)=O)N)C  
 PUGREST.BadRequest: error:  
CNC=1C(=O)C=C2[C@H1](CCC3=C(C(OC)=C(OC)C(OC)=C3)C2=CC=1)NC(C(=O)O)=CN=CNC  
 PUGREST.BadRequest: error:  
NN(C=C(CNC(CCCCC1)=O)N=N)[C@H1]1CCC2=CC(OC)=C(OC)C(OC)=C2C3=CC=C(NC)C(=O)C=C31  
 PUGREST.BadRequest: error:  
N=NC1=CN(N=N1)[C@H1]2CCC3=CC(OC)=C(OC)C(=C3C4=CC=C(NC)C(C=C42)=O)OC  
 PUGREST.BadRequest: error: CC(C)(C)OC(=O)NCCC(NCC=1N=NN(C=1)[C@H1]CCC2=CC(OC)=C(OC)C=C2C3=CC=C(NC)C(C=C3)=O)OC=O  
 PUGREST.BadRequest: error: CC(C)(C)OCNCCC(=O)NCC1=CN(N=N1)[C@H1]C2CC3=CC(OC)=C(OC)C(OC)=C3C4=CC=C(C(=O)C=C24)NC=O  
 PUGREST.BadRequest: error:  
C1(=CN(C(=O)OC)N[C@@H1]2C=3C(C4=C(OC)C(OC)=C(OC)C=C4CC2)=CC=C(C(=O)C=3)NC)N=C1  
 PUGREST.BadRequest: error: CC(C)(C)OCNCCC(=O)NCC1=CN(N=N1)[C@@H1]2C3=CC(C(NC)=C(C=C3C4=C(CC2)C=C(OC)C(=C4OC)NC)=O  
 PUGREST.BadRequest: error: CC(C)(C)OC(=O)NCCC(OC=1N=NN(C=1)[C@H1]CCC2=CC(OC)=C(OC)C(=C2C3=CC=C(NC)C(=O)C=C3)O)C=O  
 PUGREST.BadRequest: error:  
CC(C)OC(=O)/N=C(/N[C@H1]1CCC2=C(C(OC)=C(OC)C(OC)=C2)C3=CC=C(NC)C(=O)C=C13)N=N  
 PUGREST.BadRequest: error:  
C=1N(N=NC=1C(OC)=O)[C@H1]2CCC3=C(C(OC)=C(OC)C(OC)=C3)C4=CC=C(C(=O)C=C42)NCOCC  
 PUGREST.BadRequest: error:  
O=CC=CN=NN[C@H1]1CCC2=C(C(OC)=C(OC)C(=C2)OC)C3=CC=C(NC)C(=O)C=C13  
 PUGREST.BadRequest: error: C1=CN=CC=C1C(NCC2=CN(N=N2)[C@H1]3CCC4=CC(OC)=C(OC)C(=C4C5=CC=C(C(C=C53)=O)OC)OO)C  
 PUGREST.BadRequest: error:  
N=NN([C@H1]1CCC2=C(C(OC)=C(OC)C(OC)=C2)C3=CC=C(C(=O)C=C13)NC)C(=O)OC  
 PUGREST.BadRequest: error:  
CN(N([C@@H1]1C2=CC(=O)C(NC)=CC=C2C3=CC(=C(OC)C=C3CC1)OC)O)CNC(=S)NCCCCC  
 PUGREST.BadRequest: error:  
CN(N([C@@H1]1C2=CC(=O)C(NC)=CC=C2C3=CC(=C(OC)C=C3CC1)OC)O)CNC(=S)CCCCC  
 PUGREST.BadRequest: error:



O=C(CC)OCC1=CN(N=N1)[C@H1]2CCC3=CC(OC)=C(OC)C(OC)=C3C4=CC=C(NC)C(=O)C=C24  
 PUGREST.BadRequest: error: O=C(OC(C)(C)C)NCC=1N=NN(C=1)[C@H1]C2CC3=CC(OC)=C(OC)C(OC)=C3C4=CC=C(NC)C(=O)C=C42  
 PUGREST.BadRequest: error:  
O=C(C(C)C)NCN[C@H1]1CCC2=CC(OC)=C(OC)C(OC)=C2C3=CC=C(NC)C(=O)C=C13  
 PUGREST.BadRequest: error: O=C(OCC)C=1N(N=NC=1C(=O)O2)[C@H1]2NC(=S)N[C@H1]3CCC4=CC(OC)=C(OC)C(OC)=C4C=5C3=CC(C(=CC=5)NC)=O  
 PUGREST.BadRequest: error: CC(O)(C)CC(=O)OCC1=CN(N=N1)[C@H1]2CCC3=CC(OC)=C(OC)C(OC)=C3C=4C2=CC(C(=CC=4)NC)=O  
 PUGREST.BadRequest: error:  
CC(C)COC(NCC1=CN(N=N1)[C@H1]C2CC3=CC(OC)=C(OC)C(OC)=C3C4=CC=C(C(=O)C=C24)NC)=O  
 PUGREST.BadRequest: error:  
COCNCC1=CN(N=N1)[C@H1]2CCC3=CC(OC)=C(OC)C(OC)=C3C4=CC=C(NC)C(=O)C=C24  
 PUGREST.BadRequest: error: CC(C)(C)OC(NCC=1N=NN(C=1)[C@H1]2CCC3=CC(OC)=C(OC)C(OC)=C3C4=CC=C(C(C=C24)=O)N)C=O  
 PUGREST.BadRequest: error:  
N(C)C1=CC=C2C3=C(OC)C(OC)=C(OC)C=C3CC[C@@H1](C2=CC1=O)NC(C(=O)O)CCONCOCNCOC  
 PUGREST.BadRequest: error:  
O=C(OCC)C1=C(C(OCC)=O)N=NN1[C@H1]CCC2=CC(OC)=C(OC)C(OC)=C2C3=CC=C(NC)C(C=C3)=O  
 PUGREST.BadRequest: error:  
N([C@H1]1CCC2=CC(OC)=C(OC)C(OC)=C2C3=CC=C(NC)C(C=C13)=O)C=CCOC(=O)CCCC=O  
 PUGREST.BadRequest: error:  
CC(CC)N[C@H1]C1CC2=CC(OC)=C(OC)C(OC)=C2C3=CC=C(C(C=C31)=O)NCC  
 PUGREST.BadRequest: error:  
CC(CC)N[C@H1]C1CC2=CC(OC)=C(OC)C(OC)=C2C3=CC=C(NC)C(=O)C=C31  
 PUGREST.BadRequest: error:  
COC1=C2C3=CC=C(NC)C(=O)C=C3[C@@H1](NCC(CCC)C)CCC2=CC(OC)=C1OC  
 PUGREST.BadRequest: error:  
COC1=C2C3=CC=C(NC)C(=O)C=C3[C@H1](CCC2=CC(OC)=C1OC)NCC4=CC=NS4  
 PUGREST.BadRequest: error:  
COC1=C2C3=CC=C(SC)C(=O)C=C3[C@H1](CCC2=CC(OC)=C1OC)NCCCC1  
 PUGREST.BadRequest: error:  
O(C1=C(OC)C=C2C3=CC=C(SC)C(C=C3[C@H1](CCC=2C=C1OC)NC(C)CC=C)=O)C  
 PUGREST.BadRequest: error:  
C1=CN=CC=C1CN[C@H1]2CCC3=CC(OC)=C(OC)C(OC)=C3C4=CC=C(C(C=C24)=O)NCC  
 PUGREST.BadRequest: error:  
O=CC1=CN=NN1[C@H1]2CCC3=CC(OC)=C(OC)C(OC)=C3C4=CC=C(C(C=C42)=O)NC  
 PUGREST.BadRequest: error:  
NC(CCN[C@H1]1CCC2=CC(OC)=C(OC)C(OC)=C2C=3C1=CC(=O)C=CC=3)NCF  
 PUGREST.BadRequest: error:  
NC(N=C1C=CC2)=CC=C1C3=C(OC)C(OC)=C(OC)C=C3CC[C@@H1]2NC(N)=O  
 PUGREST.BadRequest: error:  
C=CC1=C(NC)C(OC)=C(OC)C=C1CC[C@H1](NC(C)=O)C2=CC(C(=CC=C2)NC)=O  
 PUGREST.BadRequest: error:  
CC(N)(CCO)[C@H1]1CCC2=CC(OC)=C(OC)C(OC)=C2C3=CC=C(NC)C(=O)C=C31  
 PUGREST.BadRequest: error:  
N(NCCCCC1)[C@H1]1CCC2=CC(OC)=C(OC)C(OC)=C2C3=CC=C(NC)C(=O)C=C31  
 PUGREST.BadRequest: error:

N(C1=CC=C(C=C1)C)CN[C@H1]2CCC3=CC(OC)=C(OC)C(OC)=C3C=4C2=CC(C(NC)=CC=4)=O  
 PUGREST.BadRequest: error:  
N(C1=CC=C(C=C1)C)CN[C@H1]2CCC3=CC(OC)=C(OC)C(OC)=C3C=4C2=CC(C(=CC=4)SC)=O  
 PUGREST.BadRequest: error:  
CCN(CC)C(=O)N[C@H1]C1CC2=CC(OC)=C(OC)C(OC)=C2C3=CC=C(C(C=C31)=O)NC  
 PUGREST.BadRequest: error:  
CCN(CC)C(=O)N1[C@H1]CCC2=CC(OC)=C(OC)C(OC)=C2C3=CC=C(NC)C(C=C31)=O  
 PUGREST.BadRequest: error:  
CCN(CC)C(=O)N[C@H1]1CCC2=CC(OC)=C(OC)C(OC)=C2C3=CC=C(C(C=C31)=O)NCC  
 PUGREST.BadRequest: error:  
CC(C)COC1=C(OC)C(OC)=CC=2CC[C@H1](NC(=O)C)C3=CC(C(SC)=CC=C3C1=2)=O  
 PUGREST.BadRequest: error:  
C=C(C)CN(CCO)C(=S)N[C@H1]1CCC2=C(C(OC)=C(OC)C(OC)=C2)C3=CC=C(NC)C(C=C31)=O  
 PUGREST.BadRequest: error:  
CC(C)C(OC=C(C(OC)=CCCC[C@H1](NC(=O)C)C1=CC(C(SC)=CC=C1C)=O)C)=O  
 PUGREST.BadRequest: error:  
N([C@H1]1CCC2=CC(OC)=C(OC)C(OC)=C2C3=CC=C(NC)C(=O)C=C31)=C(C1)C=C  
 PUGREST.BadRequest: error:  
O=C(N[C@H1]1CCC2=CC(OC)=C(OC)C(OC)=C2C3=CC=C(C(C=C31)=O)NCN)C4=CC=CC=C4  
 PUGREST.BadRequest: error:  
O=C(N[C@@H1]1C2=CC(C(NC)=CC=C2C3=C(CC1)C=C(OC)C(OC)=C3OC)=O)N=N  
 PUGREST.BadRequest: error:  
N([C@H1]1CCC2=CC(OC)=C(OC)C(OC)=C2C3=CC=C(NC)C(C=C13)=O)CNC(=O)OCCONC  
 PUGREST.BadRequest: error:  
O=C(N[C@H1]1CCC2=CC(OC)=C(OC)C(OC)=C2C3=CC=C(NC)C(=O)C=C31)CCOC(=O)O  
 PUGREST.BadRequest: error:  
C1=CCC[C@H1](NC(=S)NC2=CC=C(C=C2)C(F)(F)F)CC(C1)=CC=C(NC)C(=O)COCOC  
 PUGREST.BadRequest: error:  
CNCC(O)(C)C1=CN(N=N1)[C@H1]2CCC3=CC(OC)=C(OC)C(OC)=C3C4=CC=C(C(=O)C=C24)NC  
 PUGREST.BadRequest: error:  
N1([C@H1]2CCC3=C(C(OC)=C(OC)C(OC)=C3)C4=CC=C(NC)C(C=C24)=O)C(O)=C1C  
 PUGREST.BadRequest: error:  
N([C@H1]1CCC2=C(C(OC)=C(OC)C(OC)=C2)C3=CC=C(NC)C(C=C13)=O)NC=CC=CC1  
 PUGREST.BadRequest: error:  
C1=C(O)C(OC)=CC(CN[C@H1]2CCC3=C(C(OC)=C(OC)C(OC)=C3)C4=CC=C(SC)C(=O)C=C42)=C1C  
 PUGREST.BadRequest: error:  
COCC(C)=C(C(OC)=CCCC[C@H1](NCC)C1=CC(C(SC)=CC=C1)=O)OC  
 PUGREST.BadRequest: error:  
C[C@H1](CCC1=CC(OC)=C(OC)C(OC)=C1C2=CC=C(C(=O)C=C2)NCN)CCO  
 PUGREST.BadRequest: error:  
NC(=O)N1[C@@H1]C2=CC(C(NC)=CC=C2C3=C(OC)C(OC)=C(OC)C=C3CC1)=O  
 PUGREST.BadRequest: error:  
NN(CCO)[C@@H1]1C2=CC(C(NC)=CC=C2C3=C(OC)C(OC)=C(C=C3CC1)OC)=O  
 PUGREST.BadRequest: error:  
C1=2[C@H1](CCC3=CC(OC)=C(OC)C(OC)=C3C1=CC=C(NC)C(=O)C=2NC)CO  
 PUGREST.BadRequest: error:  
NC(N=NCOC)C[C@H1]1C2=CC(C(NC)=CC=C2C3=C(CC1)C=C(OC)C(OC)=C3OC)=O  
 PUGREST.BadRequest: error:

C1=2C(C3=C(OC)C(OC)=C(OC)C=C3CC[C@H]1)NC(C)CC)=CC=C(NC)C(=O)C=2NC  
PUGREST.BadRequest: error:  
C1=C(CN[C@H]1)2CCC3=CC(OC)=C(OC)C(OC)=C3C4=CC=C(NC)C(=O)C=C42)C=NC=C1  
PUGREST.BadRequest: error:  
C1[C@H]1(NC(NC2=CC=C(C=C2)F)=O)C3=CC(C(NC)=CC=C3C4=C(OC)C(OC)=CC=C4OCC1)=O  
PUGREST.BadRequest: error:  
C1=CC(=CC=N1)CCN[C@H]1)2C3=CC(C(SC)=CC=C3C4=C(CC2)C=C(OC)C(OC)=C4OC)=O  
PUGREST.BadRequest: error:  
C1=2[C@H]1CCC3=CC(OC)=C(OC)C(OC)=C3C1=CC=C(C(=O)C=2)NCNC(C)=O  
PUGREST.BadRequest: error:  
CC=CC1=C(C=C(OC)C(OC)=C1OC(OCC)=O)CC[C@H]1(NC(C)=O)C2=CC(C(SC)=CC=C2)=O  
PUGREST.BadRequest: error:  
O=C1C=C2[C@H]1(CCC3=C(C(OC)=C(OC)C(OC)=C3)C2=CC=C1SC)NC(N(C(C)C)C(C1)=O)NC  
PUGREST.BadRequest: error:  
O=C1C=C2[C@H]1(CCC3=C(C(OC)=C(OC)C(OC)=C3)C2=CC=C1SC)NC(C(=O)OCC)=CNC  
PUGREST.BadRequest: error:  
O=C1C=C2[C@H]1(CCC3=C(C(OC)=C(OC)C(OC)=C3)C2=CC=C1SC)NC(C(C)C)=O  
PUGREST.BadRequest: error:  
N1C=NN=NN1[C@H]1)2CCC3=C(C(OC)=C(OC)C(OC)=C3)C4=CC=C(C(C=C42)=O)NCCC  
PUGREST.BadRequest: error:  
CNC=1C(=O)C=C2[C@H]1(CCC3=CC(OC)=C(OC)C(OC)=C3C2=CC=1N)C(C(C)C)=O  
PUGREST.BadRequest: error:  
N([C@H]1)1CCC2=CC(OC)=C(OC)C(OC)=C2C3=CC=C(NC)C(C=C31)=O)CCCCF  
PUGREST.BadRequest: error:  
C[C@H]1(CCC1=CC(OC)=C(OC)C(OC)=C1C2=CC=C(C(C=C2)=O)SC)NC/C=C/C3=CC=CC=C3  
PUGREST.BadRequest: error:  
N([C@H]1)1CCC2=C(C(OC)=C(OC)C(OC)=C2)C3=CC=C(SC)C(C=C31)=O)CCCCO  
PUGREST.BadRequest: error:  
C=CC1=C(C(=O)OC=CC=C2C3=C(OC)C(OC)=C(OC)C=C3CC[C@H]1(NC(C)=O)C2=C1SC)C  
PUGREST.BadRequest: error:  
C=C1C2=C(C=C(OC)C(OC)=C2OC(OCC)=O)CC[C@H]1(NC(C)=O)C3=CC(C(NC)=CC=C13)=O  
PUGREST.BadRequest: error:  
CC=CC(N[C@H]1)1CCC2=C(C(OC)=C(OC)C(OC)=C2)C3=CC=C(SC)C(C=C13)=O)CCOC  
PUGREST.BadRequest: error:  
OC(=O)NCC1=CN(N=N1)[C@H]1)2C=3C(C4=C(C(OC)=C(OC)C=C4CC2)OC)=CC=C(NC)C(C=3)=O  
PUGREST.BadRequest: error: N(C)C=1C(=O)C=C2[C@H]1(CCC3=C(C(OC)=C(OC)C(OC)=C3)C2=CC=1)N4C(C(=O)O)=C(N=N4)C(=O)NNC  
PUGREST.BadRequest: error: O=C(C=C(C(01)CCCCC1)CN=N)N[C@H]1)2CCC3=CC(OC)=C(OC)C(OC)=C3C=4C2=CC(C(NC)=CC=4)=O  
PUGREST.BadRequest: error:  
N([C@H]1)1CCC2=C(C(OC)=C(OC)C(OC)=C2)C3=CC=C(NC)C(=O)C=C13)CNCC4=CC=C(C=C4)C=O  
PUGREST.BadRequest: error: O=C(C=C(C1)C=CN([C@H]1)1CCC2=C(C(OC)=C(OC)C(OC)=C2)C3=CC=C(NC)C(C=C13)=O)OC(=O)CC)NC(OC4=CC=CC=C4)=O  
PUGREST.BadRequest: error: CC(C)(C)OC(=O)/N=C(/N[C@H]1)1CCC2=C(C(OC)=C(OC)C(OC)=C2)C3=CC=C(NC)C(C=C31)=O)NCOC(C)=O  
PUGREST.BadRequest: error: CC(C)(C)OC(=O)/N=C(/N[C@H]1)1CCC2=C(C(OC)=C(OC)C(OC)=C2)C3=CC=C(NC)C(C=C13)=O)NCOC(C)(F)F  
PUGREST.BadRequest: error:

C12=C3C(C4=C(OC)C(OC)=C(OC)C=C4CC[C@@H1]3NC(=O)N)=CC=C1NC=C2  
PUGREST.BadRequest: error:  
O=C(OC1=C2C(CC[C@H1](NC(=O)C)C3=CC(C(SC)=CC=C32)=O)=CC(OC)=C1OC)SCC  
PUGREST.BadRequest: error:  
O=C1C=CC=C2C([C@H1](CCC3=CC(OC)=C(OC)C(OC)=C32)NC(C)=O)=C1SC  
PUGREST.BadRequest: error:  
C1=CC=C(C=C1)CN[C@H1]2CCC3=CC(OC)=C(OC)C(OC)=C3C4=CC=C(C(C=C42)=O)SCC  
PUGREST.BadRequest: error:  
CC=CCCN[C@H1]1CCC2=CC(OC)=C(OC)C(OC)=C2C3=CC=C(SC)C(C=C13)=O  
PUGREST.BadRequest: error:  
OC1=C(C=CC=C1)CN2[C@H1]CCC3=CC(OC)=C(OC)C(OC)=C3C4=CC=C(SC)C(C=C24)=O  
PUGREST.BadRequest: error:  
COC1=C2C3=CC=C(NC)C(=O)C=C3[C@H1](CCC2=CC(OC)=C1OC)NCCCCCCCCSC  
PUGREST.BadRequest: error:  
COC1=CC=2CC[C@@H1](C=3C(C=2C(=C1OC)OC)=CC=C(NC)C(=O)C=3)NC(=O)CNC  
PUGREST.BadRequest: error:  
CSC1=CC=C2C(=CC1=O)[C@H1](CCC3=CC(OC)=C(OC)C(=C23)O)CNC(=O)C  
PUGREST.BadRequest: error:  
C1=C2[C@H1](CCC3=C(C(OC)=C(C(=C3)OC)OC)C2=CC=C(C1=O)NC)NC  
PUGREST.BadRequest: error:  
CC(=O)OC1=CC=C2C3=C(C(OC)=C(C=C3CC[C@@H1](C2=CC1=O)NC(=O)CO)CO)C  
PUGREST.BadRequest: error:  
CC(=O)OC=1C(=O)C=C2C(=CC=1)C3=C(OC)C(OC)=C(C=C3CC[C@@H1]2NC(C)=O)C(=O)C  
PUGREST.BadRequest: error:  
CC(=O)OC1=CC=C2C3=C(C(OC)=C(C=C3CC[C@@H1](C2=CC1=O)NC(=O)C)OC)OC(=O)C  
PUGREST.BadRequest: error:  
CCC(=O)OC1=CC=C2C3=C(C(OC)=C(C=C3CC[C@@H1](C2=CC1=O)OC(=O)C)OC)OC  
PUGREST.BadRequest: error:  
CCC(=O)N[C@H1]1CCC2=CC(=C(OC)C(OC)=C2C=3C1=CC(=O)C(=CC=3)OC(OC)=O)OC  
PUGREST.BadRequest: error:  
CC(C)C(OC1=CC=C2C3=C(CC[C@@H1](C2=CC1=O)NC(C)=O)C=C(OC)C(OC)=C3OC)(O)C=O  
PUGREST.BadRequest: error:  
CC(C)C(OC1=CC=C2C3=C(CC[C@@H1](C2=CC1=O)NC(C)=O)C=C(OC)C(OC)=C3OC=O)C  
PUGREST.BadRequest: error:  
CC(C)C(=O)OC1=CC=C2C3=C(C(OC)=C(C=C3CC[C@@H1](C2=CC1=O)NC(C)=O)OC)OC(=O)C  
PUGREST.BadRequest: error:  
CC(C)C(OC1=CC=C2C3=C(C=C(OC)C(OC)=C3OC)CC[C@@H1](C2=CC1=O)NC(=O)CC)(O)C  
PUGREST.BadRequest: error:  
CC(=O)OCC1=CN(N=N1)[C@H1]2CCC3=CC(OC)=C(OC)C(OC)=C3C=4C2=CC(=O)C(=CC=4)NCC  
PUGREST.BadRequest: error:  
C1=C(C2=C(OC)C(OC)=C1OC(=O)CCC)C[C@@H1](C3=CC(=O)C(SC)=CC=C32)NC(C)=O  
PUGREST.BadRequest: error:  
CC(=O)N[C@H1]1CCC2=CC(OC)=C(OC)C(=C2C3=CC=C(C(C=C31)=O)OCC4=CC=CC=C4)OOC  
PUGREST.BadRequest: error:  
O=C(C)N[C@H1]1CCC2=CC(=C(OC)C(=C2C=3C1=CC(C(=CC=3)OC(=O)OC)=O)CN)C(=O)COCC  
PUGREST.BadRequest: error:  
C=12C(=O)C(=CC=C3C=1[C@H1](CCC4=CC(OC)=C(OC)C(OC)=C34)NC(C)=O)C2  
PUGREST.BadRequest: error:

CCC(=O)N[C@H]1CCC2=C(C(OC)=C(C(OC)=C2)OC)C=3C1=CC(C(SC)=CC=3)=O  
PUGREST.BadRequest: error:  
CCC(=O)N[C@H]1CCC2=CC(OC)=C(C(OC)=C2C=3C1=CC(=O)C(=CC=3)SC)OC(=O)OCC  
PUGREST.BadRequest: error:  
CC=1C(=CC(C(=CC=1)SC)=O)[C@H]1(CCC2=CC(OC)=C(OC)C(=C2)OC)NC(=O)C  
PUGREST.BadRequest: error:  
CC(C)COCCN[C@H]1CCC2=CC(OC)=C(C(=C2C=3C1=CC(C(=CC=3)SC)=O)OC)OC(=O)C  
PUGREST.BadRequest: error:  
CC(C)CCN[C@H]1CCC2=C(C3=CC=C(SC)C(C=C31)=O)C(=C(C(OC)=C2)OC)OCCC  
PUGREST.BadRequest: error:  
CC(C)CCN[C@H]1CCC2=C(C3=CC=C(SC)C(C=C31)=O)C(=C(C(OC)=C2)OC)OC(=O)C  
PUGREST.BadRequest: error:  
C1=C(OC)C(=C(OC)C2=C1CC[C@H]1(NC(=O)C)C=3C2=CC=C(OC(=O)OC)C(C=3)=O)C  
PUGREST.BadRequest: error:  
O=C(C)N[C@H]1CCC2=CC(OC)=C(C(OC)=C2C3=CC=C(C(=O)C=C13)OCCC)OOC  
PUGREST.BadRequest: error:  
O=C(N(C)C)NC1=CC=C2C3=C(OC)C(=C(OC)C=C3CC[C@@H]1(C2=CC1=O)NCC)OOC  
PUGREST.BadRequest: error:  
O=C(N)N[C@H]1CCC2=CC(OC)=C(C(OC)=C2C=3C1=CC(C(OC(=O)C)=CC=3)=O)OC  
PUGREST.BadRequest: error:  
O=C(C)N[C@H]1CCC2=CC(OC)=C(C(OC)=C2C3=CC=C(C(=O)C=C31)OC(=O)O)CCOC  
PUGREST.BadRequest: error:  
CC(=O)N1[C@H]1CCC2=CC(OC)=C(OC)C(OC)=C2C3=CC=C(NC)C(C=C31)=O  
PUGREST.BadRequest: error:  
COC1=C2C3=CC=C(NC)C(=O)C=C3[C@H]1(CCC2=CC(OC)=C1OC)NO  
PUGREST.BadRequest: error:  
C1[C@@H]1(C2=CC(=O)C(NC)=CC=C2C3=C(C=C(OC)C(=C3OC)OC)C1)NCCSC  
PUGREST.BadRequest: error:  
CNC(C(C)O)N([C@H]1CCC2=CC(=C(OC)C(OC)=C2C=3C1=CC(=O)C(=CC=3)NC)OCC)C  
PUGREST.BadRequest: error:  
CNC(C(C)O)N[C@@H]1C=2C(C3=C(C=C(OC)C(OC)=C3OC)CC1)=CC=C(C(=O)C=2)NC  
PUGREST.BadRequest: error:  
CNC(=S)N[C@@H]1C2=CC(=O)C(NC)=CC=C2C3=C(OC)C(=C(C=C3CC1)OC)OCO  
PUGREST.BadRequest: error:  
N([C@H]1CCC2=C(C3=CC=C(C(C=C13)=O)NC)C(OC)=C(OC)C(OC)=C2)N=N  
PUGREST.BadRequest: error:  
C12=CC(C(NC)=CC=C1C3=C(C=C(C(OC)=C3OC)OC)CC[C@@H]12NCCCCCCCCCF)=O  
PUGREST.BadRequest: error:  
COC1=C(OC)C(OC)=CC=2CC[C@@H]1(C3=CC(=O)C(NC)=CC=C3C=21)NCCC4=CC=CC=C4NC  
PUGREST.BadRequest: error:  
COC1=C(OC)C(OC)=CC=2CC[C@@H]1(C3=CC(=O)C(NC)=CC=C3C=21)N4C=C(N=N4)CCONC  
PUGREST.BadRequest: error:  
CN(C(=S)N[C@@H]1C2=CC(=O)C(NC)=CC=C2C3=C(C(=C(OC)C=C3CC1)OC)OC)CC#N  
PUGREST.BadRequest: error:  
CC(C)(C)OC1=CN(N=N1)[C@H]1C2CC3=CC(OC)=C(OC)C(OC)=C3C4=CC=C(NC)C(=O)C=C42  
PUGREST.BadRequest: error:  
CC(C)CCCCCN[C@@H]1C2=CC(C(SC)=CC=C2C3=C(C(OC)=C(OC)C=C3CC1)OC)=O  
PUGREST.BadRequest: error:

CC(C)(C)C(=O)N[C@@H]1C=2C(C3=C(C(OC)=C(OC)C=C3CC1)OC)=CC=C(NC)C(=O)C=2  
 PUGREST.BadRequest: error:  
OC(CCC(C)C)OCC1=CN(N=N1)[C@H]1CCC2=CC(OC)=C(OC)C(OC)=C2C3=CC=C(C(=O)C=C3)NC  
 PUGREST.BadRequest: error:  
O=C(NCC1=CC=CC=C1C1)N[C@H]12CCC3=C(C(OC)=C(OC)C(OC)=C3)C4=CC=C(NC)C(=O)C=C24  
 PUGREST.BadRequest: error:  
N([C@H]1CCC2=C(C(OC)=C(OC)C(OC)=C2)C3=CC=C(NC)C(C=C13)=O)C(=O)=O  
 PUGREST.BadRequest: error:  
O=CC=CCC=CN(CN[C@H]1CCC2=CC(OC)=C(OC)C(OC)=C2C3=CC=C(NC)C(=O)C=C13)=O  
 PUGREST.BadRequest: error:  
OC1=C(C=CC=C1)C=2N=NN(C=2)[C@H]1C3CC4=CC(OC)=C(OC)C(OC)=C4C5=CC=C(NC)C(=O)C=C53  
 PUGREST.BadRequest: error:  
OC1=C(C=CC=C1)C=2N=NN(C=2)[C@H]1CCC3=CC(OC)=C(OC)C(OC)=C3C4=CC=C(NC)C(=O)C=C4  
 PUGREST.BadRequest: error:  
C1[C@@H]1(C2=CC(=O)C(NC)=CC=C2C3=C(C(=C(OC)C=C3C1)OC)OC)N4C=C(N=N4)COC  
 PUGREST.BadRequest: error:  
O=C(OC(C)(C)C)N[C@H]1CCC2=C(C(OC)=C(OC)C(OC)=C2)C3=CC=C(NC)C(=O)C=C13  
 PUGREST.BadRequest: error:  
O=C(OCC)CN(OCC)C[C@H]1C2=CC(C(NC)=CC=C2C3=C(C(OC)=C(OC)C=C3CC1)OC)=O  
 PUGREST.BadRequest: error:  
O=C(C)OC1=CN(N=N1)[C@H]12CCC3=CC(OC)=C(OC)C(OC)=C3C4=CC=C(NC)C(=O)C=C24  
 PUGREST.BadRequest: error:  
O=C(OCC)CN(CCC)C[C@H]1C1CC2=CC(OC)=C(OC)C(OC)=C2C3=CC=C(SC)C(=O)C=C31  
 PUGREST.BadRequest: error: O=C(C(C1)C1)NC(=O)N[C@H]1CCC2=C(C(OC)=C(OC)C(OC)=C2)C3=CC=C(C(C=C31)=O)NCN(O)CCC=O  
 PUGREST.BadRequest: error: O=C(C(C1)C1)NC(=O)N[C@H]1CCC2=C(C(OC)=C(OC)C(OC)=C2)C3=CC=C(C(C=C31)=O)NCC4=CC=CC=C4  
 PUGREST.BadRequest: error:  
O=C(OCCC)OCC1=CN(N=N1)[C@H]12CCC3=CC(OC)=C(OC)C(OC)=C3C4=CC=C(C(=O)C=C24)NCCO  
 PUGREST.BadRequest: error: O=C(OCCC)OCC1=CN(N=N1)[C@H]12CCC3=CC(OC)=C(OC)C(OC)=C3C4=CC=C(C(=O)C=C42)NCC(=O)C  
 PUGREST.BadRequest: error: O=C(OCC=C)NCC1=CN(N=N1)[C@H]12CCC3=CC(OC)=C(OC)C(OC)=C3C4=CC=C(C(=O)C=C24)NCC(=O)C  
 PUGREST.BadRequest: error: O=C(C(C1)C1)NCC1=CN(N=N1)[C@H]12CCC3=CC(OC)=C(OC)C(OC)=C3C4=CC=C(C(=O)C=C24)NCC(=O)C  
 PUGREST.BadRequest: error: O=C(C(C1)C1)NCC1=CN(N=N1)[C@H]12CCC3=CC(OC)=C(OC)C(=C3C=4C2=CC(C(NC)=CC=4)=O)OCCC1  
 PUGREST.BadRequest: error:  
O=C(C)N[C@@H]1CC(C2=C(C(OC)=C(OC)C=C2CC1)OCC3=CC=CC=C3)=O  
 PUGREST.BadRequest: error:  
O=C(C(C1)C1)NC(=O)N[C@H]1CCC2=CC(OC)=C(OC)C(OC)=C2C3=CC=C(C(C=C31)=O)NCC(=O)O  
 PUGREST.BadRequest: error:  
O=C(OCC)C1=CN(N=N1)[C@H]12CCC3=CC(OC)=C(OC)C(OC)=C3C4=CC=C(C(C=C24)=O)NCC(=O)C  
 PUGREST.BadRequest: error:  
O=C(O)CN(CCO)C(=O)N[C@H]1CCC2=CC(OC)=C(OC)C(OC)=C2C3=CC=C(C(C=C13)=O)NCC  
 PUGREST.BadRequest: error:  
CC(C)OC(NCC1=CN(N=N1)[C@H]12CCC3=CC(OC)=C(OC)C(OC)=C3C4=CC=CC(C=C24)=O)NC=O  
 PUGREST.BadRequest: error:

COC(NCCCC1=CN(N=N1)[C@H]2CCC3=CC(OC)=C(OC)C(=C3C4=CC=C(NC)C(C=C24)=O)OC=O)=O  
 PUGREST.BadRequest: error:  
C=1C(C)OC(=O)/N=C(/N[C@H]2CCC3=C(C(OC)=C(OC)C(OC)=C3)C4=CC=C(NC)C(=O)C=C42)N=1  
 PUGREST.BadRequest: error:  
C1=CN=CC=C1C2=CN(N=N2)[C@H]3CCC4=C(C(OC)=C(OC)C(OC)=C4)C5=CC=C(C(=O)C=C35)NCO  
 PUGREST.BadRequest: error:  
COC=C(OC)C(OC)=CCCC[C@H](N1C=C(N=N1)COC(=O)C2=CC=NC=C2)C3=CC(=O)C(=CC=C3CNCN)C  
 PUGREST.BadRequest: error:  
COC1=C(OC)C=CC=2CC[C@@H](C3=CC(=O)C(NC)=CC=C3C1=2)N4C=C(N=N4)COC5=CC=CC=C5OC  
 PUGREST.BadRequest: error:  
CC(C)(O)C=CN([C@H]1CCC2=CC(OC)=C(OC)C(OC)=C2C3=CC=C(C(C=C13)=O)NC)O  
 PUGREST.BadRequest: error:  
C=12C(=CC(C(NC)=CC=1)=O)[C@H](CCC3=CC(OC)=C(OC)C(=C32)OC)C(C)C=O  
 PUGREST.BadRequest: error:  
NC(=O)NCC1=CN(N=N1)[C@H]2CCC3=CC(OC)=C(OC)C(OC)=C3C4=CC=C(NC)C(=O)C=C24  
 PUGREST.BadRequest: error:  
C1=CC(OC)=CC=C1CN[C@H]2CCC3=C(C(OC)=C(OC)C(OC)=C3)C=4C2=CC(C(=CC=4)NC)=O  
 PUGREST.BadRequest: error:  
N(C(C1=CC=CC=C1)=O)CCN[C@H]2CCC3=CC(OC)=C(OC)C(OC)=C3C4=CC=C(C(C=C24)=O)SC  
 PUGREST.BadRequest: error:  
N=NC(=C(C(OC)=O)N[C@H]1CCC2=CC(OC)=C(OC)C(OC)=C2C3=CC=C(C(C=C13)=O)N)C  
 PUGREST.BadRequest: error:  
CNC=1C(=O)C=C2[C@H](CCC3=C(C(OC)=C(OC)C(OC)=C3)C2=CC=1)NC(C(=O)O)=CN=CNC  
 PUGREST.BadRequest: error:  
NN(C=C(CNC(CCCCC1)=O)N=N)[C@H]1CCC2=CC(OC)=C(OC)C(OC)=C2C3=CC=C(NC)C(=O)C=C31  
 PUGREST.BadRequest: error:  
N=NC1=CN(N=N1)[C@H]2CCC3=CC(OC)=C(OC)C(=C3C4=CC=C(NC)C(C=C42)=O)OC  
 PUGREST.BadRequest: error: CC(C)(C)OC(=O)NCCC(NCC=1N=NN(C=1)[C@H]CCC2=CC(OC)=C(OC)C=C2C3=CC=C(NC)C(C=C3)=O)OC=O  
 PUGREST.BadRequest: error: CC(C)(C)OCNCCC(=O)NCC1=CN(N=N1)[C@H]C2CC3=CC(OC)=C(OC)C(OC)=C3C4=CC=C(C(=O)C=C24)NC=O  
 PUGREST.BadRequest: error:  
C1(=CN(C(=O)OC)N[C@@H]2C=3C(C4=C(OC)C(OC)=C(OC)C=C4CC2)=CC=C(C(=O)C=3)NC)N=C1  
 PUGREST.BadRequest: error: CC(C)(C)OCNCCC(=O)NCC1=CN(N=N1)[C@@H]2C3=CC(C(NC)=C(C=C3C4=C(CC2)C=C(OC)C(=C4OC)NC)=O  
 PUGREST.BadRequest: error: CC(C)(C)OC(=O)NCCC(OC=1N=NN(C=1)[C@H]CCC2=CC(OC)=C(OC)C(=C2C3=CC=C(NC)C(=O)C=C3)O)C=O  
 PUGREST.BadRequest: error:  
CC(C)OC(=O)/N=C(/N[C@H]1CCC2=C(C(OC)=C(OC)C(OC)=C2)C3=CC=C(NC)C(=O)C=C13)N=N  
 PUGREST.BadRequest: error:  
C=1N(N=NC=1C(OC)=O)[C@H]2CCC3=C(C(OC)=C(OC)C(OC)=C3)C4=CC=C(C(=O)C=C42)NCOCC  
 PUGREST.BadRequest: error:  
O=CC=CN=NN[C@H]1CCC2=C(C(OC)=C(OC)C(=C2)OC)C3=CC=C(NC)C(=O)C=C13  
 PUGREST.BadRequest: error: C1=CN=CC=C1C(NCC2=CN(N=N2)[C@H]3CCC4=CC(OC)=C(OC)C(=C4C5=CC=C(C(C=C53)=O)OC)OO)C  
 PUGREST.BadRequest: error:  
N=NN([C@H]1CCC2=C(C(OC)=C(OC)C(OC)=C2)C3=CC=C(C(=O)C=C13)NC)C(=O)OCC  
 PUGREST.BadRequest: error:

CN(N([C@H1]1C2=CC(=O)C(NC)=CC=C2C3=CC(=C(OC)C=C3CC1)OC)O)CNC(=S)NCCCCC  
 PUGREST.BadRequest: error:  
 CN(N([C@H1]1C2=CC(=O)C(NC)=CC=C2C3=CC(=C(OC)C=C3CC1)OC)O)CNC(=S)CCCCC  
 PUGREST.BadRequest: error:  
 O=C(CC)OCC1=CN(N=N1)[C@H1]2CCC3=CC(OC)=C(OC)C(OC)=C3C4=CC=C(NC)C(=O)C=C24  
 PUGREST.BadRequest: error: O=C(OC(C)(C)C)NCC=1N=NN(C=1)[C@H1]C2CC3=CC(OC)=C(OC)  
 C(OC)=C3C4=CC=C(NC)C(=O)C=C42  
 PUGREST.BadRequest: error:  
 O=C(C(C)C)NCN[C@H1]1CCC2=CC(OC)=C(OC)C(OC)=C2C3=CC=C(NC)C(=O)C=C13  
 PUGREST.BadRequest: error: O=C(OC)C=1N(N=NC=1C(=O)O2)[C@H1]2NC(=S)N[C@H1]3CCC4  
 =CC(OC)=C(OC)C(OC)=C4C=5C3=CC(C(=CC=5)NC)=O  
 PUGREST.BadRequest: error: CC(O)(C)CC(=O)OCC1=CN(N=N1)[C@H1]2CCC3=CC(OC)=C(OC)C  
 (OC)=C3C=4C2=CC(C(=CC=4)NC)=O  
 PUGREST.BadRequest: error:  
 CC(C)COC(NCC1=CN(N=N1)[C@H1]C2CC3=CC(OC)=C(OC)C(OC)=C3C4=CC=C(C(=O)C=C24)NC)=O  
 PUGREST.BadRequest: error:  
 COCNCC1=CN(N=N1)[C@H1]2CCC3=CC(OC)=C(OC)C(OC)=C3C4=CC=C(NC)C(=O)C=C24  
 PUGREST.BadRequest: error: CC(C)(C)OC(NCC=1N=NN(C=1)[C@H1]2CCC3=CC(OC)=C(OC)C(O  
 C)=C3C4=CC=C(C(C=C24)=O)N)C=O  
 PUGREST.BadRequest: error:  
 N(C)C1=CC=C2C3=C(OC)C(OC)=C(OC)C=C3CC[C@H1](C2=CC1=O)NC(C(=O)O)CCONCOCNCOC  
 PUGREST.BadRequest: error:  
 O=C(OC)C1=C(C(OC)=O)N=NN1[C@H1]CCC2=CC(OC)=C(OC)C(OC)=C2C3=CC=C(NC)C(C=C3)=O  
 PUGREST.BadRequest: error:  
 N([C@H1]1CCC2=CC(OC)=C(OC)C(OC)=C2C3=CC=C(NC)C(C=C13)=O)C=CCOC(=O)CCCC=O  
 PUGREST.BadRequest: error:  
 CC(CC)N[C@H1]C1CC2=CC(OC)=C(OC)C(OC)=C2C3=CC=C(C(C=C31)=O)NCC  
 PUGREST.BadRequest: error:  
 CC(CC)N[C@H1]C1CC2=CC(OC)=C(OC)C(OC)=C2C3=CC=C(NC)C(=O)C=C31  
 PUGREST.BadRequest: error:  
 COC1=C2C3=CC=C(NC)C(=O)C=C3[C@H1](NCC(CCC)C)CCC2=CC(OC)=C1OC  
 PUGREST.BadRequest: error:  
 COC1=C2C3=CC=C(NC)C(=O)C=C3[C@H1](CCC2=CC(OC)=C1OC)NCC4=CC=NS4  
 PUGREST.BadRequest: error:  
 COC1=C2C3=CC=C(SC)C(=O)C=C3[C@H1](CCC2=CC(OC)=C1OC)NCCCC1  
 PUGREST.BadRequest: error:  
 O(C1=C(OC)C=C2C3=CC=C(SC)C(C=C3[C@H1](CCC=2C=C1OC)NC(C)CC=C)=O)C  
 PUGREST.BadRequest: error:  
 C1=CN=CC=C1CN[C@H1]2CCC3=CC(OC)=C(OC)C(OC)=C3C4=CC=C(C(C=C24)=O)NCC  
 PUGREST.BadRequest: error:  
 O=CC1=CN=NN1[C@H1]2CCC3=CC(OC)=C(OC)C(OC)=C3C4=CC=C(C(C=C42)=O)NC  
 PUGREST.BadRequest: error:  
 NC(CCN[C@H1]1CCC2=CC(OC)=C(OC)C(OC)=C2C=3C1=CC(=O)C=CC=3)NCF  
 PUGREST.BadRequest: error:  
 NC(N=C1C=CC2)=CC=C1C3=C(OC)C(OC)=C(OC)C=C3CC[C@H1]2NC(N)=O  
 PUGREST.BadRequest: error:  
 C=CC1=C(NC)C(OC)=C(OC)C=C1CC[C@H1](NC(C)=O)C2=CC(C(=CC=C2)NC)=O  
 PUGREST.BadRequest: error:



CC(N)(CCO)[C@H]1CCC2=CC(OC)=C(OC)C(OC)=C2C3=CC=C(NC)C(=O)C=C31  
 PUGREST.BadRequest: error:  
N(NCCCC1)[C@H]1CCC2=CC(OC)=C(OC)C(OC)=C2C3=CC=C(NC)C(=O)C=C31  
 PUGREST.BadRequest: error:  
N(C1=CC=C(C=C1)C)CN[C@H]1CCCC3=CC(OC)=C(OC)C(OC)=C3C=4C2=CC(C(NC)=CC=4)=O  
 PUGREST.BadRequest: error:  
N(C1=CC=C(C=C1)C)CN[C@H]1CCCC3=CC(OC)=C(OC)C(OC)=C3C=4C2=CC(C(=CC=4)SC)=O  
 PUGREST.BadRequest: error:  
CCN(CC)C(=O)N[C@H]1C1CC2=CC(OC)=C(OC)C(OC)=C2C3=CC=C(C(C=C31)=O)NC  
 PUGREST.BadRequest: error:  
CCN(CC)C(=O)N1[C@H]1CCC2=CC(OC)=C(OC)C(OC)=C2C3=CC=C(NC)C(C=C31)=O  
 PUGREST.BadRequest: error:  
CCN(CC)C(=O)N[C@H]1CCC2=CC(OC)=C(OC)C(OC)=C2C3=CC=C(C(C=C31)=O)NCC  
 PUGREST.BadRequest: error:  
CC(C)COC1=C(OC)C(OC)=CC=2CC[C@H]1(NC(=O)C)C3=CC(C(SC)=CC=C3C1=2)=O  
 PUGREST.BadRequest: error:  
C=C(C)CN(CCO)C(=S)N[C@H]1CCC2=C(C(OC)=C(OC)C(OC)=C2)C3=CC=C(NC)C(C=C31)=O  
 PUGREST.BadRequest: error:  
CC(C)C(OC=C(C(OC)=CCCC[C@H]1(NC(=O)C)C1=CC(C(SC)=CC=C1C)=O)C)=O  
 PUGREST.BadRequest: error:  
N([C@H]1CCC2=CC(OC)=C(OC)C(OC)=C2C3=CC=C(NC)C(=O)C=C31)=C(C1)C=C  
 PUGREST.BadRequest: error:  
O=C(N[C@H]1CCC2=CC(OC)=C(OC)C(OC)=C2C3=CC=C(C(C=C31)=O)NCN)C4=CC=CC=C4  
 PUGREST.BadRequest: error:  
O=C(N[C@H]1C2=CC(C(NC)=CC=C2C3=C(CC1)C=C(OC)C(OC)=C3OC)=O)N=N  
 PUGREST.BadRequest: error:  
N([C@H]1CCC2=CC(OC)=C(OC)C(OC)=C2C3=CC=C(NC)C(C=C13)=O)CNC(=O)OCCONC  
 PUGREST.BadRequest: error:  
O=C(N[C@H]1CCC2=CC(OC)=C(OC)C(OC)=C2C3=CC=C(NC)C(=O)C=C31)CCOC(=O)O  
 PUGREST.BadRequest: error:  
C1=CCC[C@H]1(NC(=S)NC2=CC=C(C=C2)C(F)(F)F)CC(C1)=CC=C(NC)C(=O)COCOC  
 PUGREST.BadRequest: error:  
CNCC(O)(C)C1=CN(N=N1)[C@H]1CCCC3=CC(OC)=C(OC)C(OC)=C3C4=CC=C(C(=O)C=C24)NC  
 PUGREST.BadRequest: error:  
N1([C@H]1CCCC3=C(C(OC)=C(OC)C(OC)=C3)C4=CC=C(NC)C(C=C24)=O)C(O)=C1C  
 PUGREST.BadRequest: error:  
N([C@H]1CCC2=C(C(OC)=C(OC)C(OC)=C2)C3=CC=C(NC)C(C=C13)=O)NC=CC=CC1  
 PUGREST.BadRequest: error:  
C1=C(O)C(OC)=CC(CN[C@H]1CCCC3=C(C(OC)=C(OC)C(OC)=C3)C4=CC=C(SC)C(=O)C=C42)=C1C  
 PUGREST.BadRequest: error:  
COCC(C)=C(C(OC)=CCCC[C@H]1(NCC)C1=CC(C(SC)=CC=C1)=O)OC  
 PUGREST.BadRequest: error:  
C[C@H]1(CCC1=CC(OC)=C(OC)C(OC)=C1C2=CC=C(C(=O)C=C2)NCN)CCO  
 PUGREST.BadRequest: error:  
NC(=O)N1[C@H]1C2=CC(C(NC)=CC=C2C3=C(OC)C(OC)=C(OC)C=C3CC1)=O  
 PUGREST.BadRequest: error:  
NN(CCO)[C@H]1C2=CC(C(NC)=CC=C2C3=C(OC)C(OC)=C(C=C3CC1)OC)=O  
 PUGREST.BadRequest: error:

C1=2[C@H1](CCC3=CC(OC)=C(OC)C(OC)=C3C1=CC=C(NC)C(=O)C=2NC)CO  
 PUGREST.BadRequest: error:  
NC(N=NCOC)C[C@H1]1C2=CC(C(NC)=CC=C2C3=C(CC1)C=C(OC)C(OC)=C3OC)=O  
 PUGREST.BadRequest: error:  
C1=2C(C3=C(OC)C(OC)=C(OC)C=C3CC[C@H1]1NC(C)CC)=CC=C(NC)C(=O)C=2NC  
 PUGREST.BadRequest: error:  
C1=C(CN[C@H1]2CCC3=CC(OC)=C(OC)C(OC)=C3C4=CC=C(NC)C(=O)C=C42)C=NC=C1  
 PUGREST.BadRequest: error:  
C1[C@H1](NC(NC2=CC=C(C=C2)F)=O)C3=CC(C(NC)=CC=C3C4=C(OC)C(OC)=CC=C4OCC1)=O  
 PUGREST.BadRequest: error:  
C1=CC(=CC=N1)CCN[C@@H1]2C3=CC(C(SC)=CC=C3C4=C(CC2)C=C(OC)C(OC)=C4OC)=O  
 PUGREST.BadRequest: error:  
C1=2[C@H1]CCC3=CC(OC)=C(OC)C(OC)=C3C1=CC=C(C(=O)C=2)NCNC(C)=O  
 PUGREST.BadRequest: error:  
CC=CC1=C(C=C(OC)C(OC)=C1OC(OCC)=O)CC[C@H1](NC(C)=O)C2=CC(C(SC)=CC=C2)=O  
 PUGREST.BadRequest: error:  
O=C1C=C2[C@H1](CCC3=C(C(OC)=C(OC)C(OC)=C3)C2=CC=C1SC)NC(N(C(C)C)C(C1)=O)NC  
 PUGREST.BadRequest: error:  
O=C1C=C2[C@H1](CCC3=C(C(OC)=C(OC)C(OC)=C3)C2=CC=C1SC)NC(C(=O)OCC)=CNC  
 PUGREST.BadRequest: error:  
O=C1C=C2[C@H1](CCC3=C(C(OC)=C(OC)C(OC)=C3)C2=CC=C1SC)NC(C(C)C)=O  
 PUGREST.BadRequest: error:  
N1C=NN=NN1[C@H1]2CCC3=C(C(OC)=C(OC)C(OC)=C3)C4=CC=C(C(C=C42)=O)NCCC  
 PUGREST.BadRequest: error:  
CNC=1C(=O)C=C2[C@H1](CCC3=CC(OC)=C(OC)C(OC)=C3C2=CC=1N)C(C(C)C)=O  
 PUGREST.BadRequest: error:  
N([C@H1]1CCC2=CC(OC)=C(OC)C(OC)=C2C3=CC=C(NC)C(C=C31)=O)CCCCF  
 PUGREST.BadRequest: error:  
C[C@H1](CCC1=CC(OC)=C(OC)C(OC)=C1C2=CC=C(C(C=C2)=O)SC)NC/C=C/C3=CC=CC=C3  
 PUGREST.BadRequest: error:  
N([C@H1]1CCC2=C(C(OC)=C(OC)C(OC)=C2)C3=CC=C(SC)C(C=C31)=O)CCCCO  
 PUGREST.BadRequest: error:  
C=CC1=C(C(=O)OC=CC=C2C3=C(OC)C(OC)=C(OC)C=C3CC[C@H1](NC(C)=O)C2=C1SC)C  
 PUGREST.BadRequest: error:  
C=C1C2=C(C=C(OC)C(OC)=C2OC(OCC)=O)CC[C@H1](NC(C)=O)C3=CC(C(NC)=CC=C13)=O  
 PUGREST.BadRequest: error:  
CC=CC(N[C@H1]1CCC2=C(C(OC)=C(OC)C(OC)=C2)C3=CC=C(SC)C(C=C13)=O)CCOC  
 PUGREST.BadRequest: error:  
OC(=O)NCC1=CN(N=N1)[C@@H1]2C=3C(C4=C(C(OC)=C(OC)C=C4CC2)OC)=CC=C(NC)C(C=3)=O  
 PUGREST.BadRequest: error: N(C)C=1C(=O)C=C2[C@H1](CCC3=C(C(OC)=C(OC)C(OC)=C3)C2=CC=1)N4C(C(=O)O)=C(N=N4)C(=O)NNC  
 PUGREST.BadRequest: error: O=C(C=C(C(O1)CCCCC1)CN=N)N[C@H1]2CCC3=CC(OC)=C(OC)C(OC)=C3C=4C2=CC(C(NC)=CC=4)=O  
 PUGREST.BadRequest: error:  
N([C@H1]1CCC2=C(C(OC)=C(OC)C(OC)=C2)C3=CC=C(NC)C(=O)C=C13)CNCC4=CC=C(C=C4)C=O  
 PUGREST.BadRequest: error: O=C(C=C(C1)C=CN([C@H1]1CCC2=C(C(OC)=C(OC)C(OC)=C2)C3=CC=C(NC)C(C=C13)=O)OC(=O)CC)NC(OC4=CC=CC=C4)=O  
 PUGREST.BadRequest: error: CC(C)(C)OC(=O)/N=C(/N[C@H1]1CCC2=C(C(OC)=C(OC)C(OC)=

```

C2)C3=CC=C(NC)C(C=C31)=O)NCOC(C)=O
PUGREST.BadRequest: error: CC(C)(C)OC(=O)/N=C(/N[C@H1]1CCC2=C(C(OC)=C(OC)C(OC)=
C2)C3=CC=C(NC)C(C=C13)=O)NCOC(C)(F)F
PUGREST.BadRequest: error:
C12=C3C(C4=C(OC)C(OC)=C(OC)C=C4CC[C@H1]3NC(=O)N)=CC=C1NC=C2

```

```
[6]: compound = pcp.get_compounds(data_['SMILES'][2], 'smiles')
```

```
[7]: compound
```

```
[7]: [Compound()]
```

```
[8]: compound[0].cid
```

```
[9]: compound[0].canonical_smiles
```

```
[10]: data_.CID.unique()
```

```
[10]: array([
           nan, 0.00000000e+00, 6.35135500e+06, 1.62648725e+08,
           1.64628185e+08, 1.62672356e+08])
```

```
[ ]:
```

```
[11]: len(data_.CID.unique())
```

```
[11]: 6
```

```
[12]: data_.to_excel('../Data/PubChemSearch_colchicine_selected.xlsx')
```

# Notebook

December 19, 2023

## 1 File 48

```
[1]: import pandas as pd
```

```
import os
import shutil
```

```
from rdkit import Chem
from rdkit.Chem import Draw
from rdkit.Chem import AllChem
```

```
[2]: colchicine = 'CC(=O)NC1CCC2=CC(=C(C(=C2C3=CC=C(C(=O)C=C13)OC)OC)OC)OC'
```

```
[3]: def create_PDB_from_SMILES(smiles, name):
    try:
        mol = Chem.MolFromSmiles(smiles)
    except:
        print("There is an error when preparing molecule: "+str(smiles))

    try:
        new_mol = Chem.AddHs(mol)
        AllChem.EmbedMolecule(new_mol, randomSeed=0xf00d)
    except:
        print("Error:"+str(smiles))

    try:
        Chem.rdmolfiles.MolToPDBFile(new_mol,
        ↪"3D_structure"+'_'+str(name)+'_'+str(smiles[0:30])+'.pdb')
    except:
        print("Something went wrong while creating PDB file...")

    return new_mol
```

```
[4]: col = create_PDB_from_SMILES(colchicine, 'raw_colchicine')
```

```
[5]: col
```

```
[5]:
```

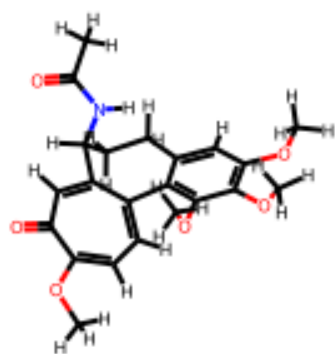

# Notebook

December 19, 2023

## 1 File 49

```
[1]: import pandas as pd

import os
import shutil

from rdkit import Chem
from rdkit.Chem import Draw
from rdkit.Chem import AllChem

import glob
```

```
[2]: excel_sheet = glob.glob('*.xlsx')
```

```
[3]: excel_sheet
```

```
[3]: ['Whole_report.xlsx']
```

```
[4]: dat_list = pd.read_excel(excel_sheet[0])
```

```
[5]: dat_list.head()
```

```
[5]:
```

|   | Structure | SMILES                                                         | SYBA score \ |
|---|-----------|----------------------------------------------------------------|--------------|
| 0 | NaN       | <chem>COC1=C2C3=CC=C(NC)C(=O)C=C3[C@H1](CCC2=CC(OC)=...</chem> | 45.88        |
| 1 | NaN       | <chem>COC1=C2C3=CC=C(NC)C(=O)C=C3[C@H1](CCC2=CC(OC)=...</chem> | 68.25        |
| 2 | NaN       | <chem>COC1=C2C3=CC=C(NC)C(=O)C=C3[C@H1](CCC2=CC(OC)=...</chem> | 74.22        |
| 3 | NaN       | <chem>COC1=C2C3=CC=C(NC)C(=O)C=C3[C@H1](CCC2=CC(OC)=...</chem> | 40.43        |
| 4 | NaN       | <chem>O=CC1=CN=NN1[C@H1]2CCC3=CC(OC)=C(OC)C(OC)=C3C4...</chem> | 41.84        |

|   | A549 [nM] | BALB/3T3 [nM] | LoVo [nM] | LoVo/DX [nM] | MCF-7 [nM] |
|---|-----------|---------------|-----------|--------------|------------|
| 0 | 12        | 6             | 7         | 145          | 8          |
| 1 | 12        | 9             | 15        | 39           | 10         |
| 2 | 12        | 30            | 17        | 29           | 9          |
| 3 | 12        | 23            | 6         | 235          | 5          |
| 4 | 12        | 11            | 3         | 1425         | 12         |

## 1.1 Create directories

```
[6]: #to get the current working directory
directory = os.getcwd()
directory
```

```
[6]: 'C:\\Users\\aleks\\Documents\\GitHub\\Kolchicyna\\Molecular docking'
```

```
[7]: list_dir = []

dat_list['destenation'] = 0

for i, structure in enumerate(dat_list['SMILES']):
    os.mkdir(os.path.join(directory, str(str(i+1)+'_lig'+str(i+1)+'_')))
    dat_list['destenation'][i] = os.path.join(directory,
↪str(str(i+1)+'_lig'+str(i+1)+'_'))
    list_dir.append(os.path.join(directory, str(str(i+1)+'_lig'+str(i+1)+'_')))
```

C:\Users\aleks\AppData\Local\Temp\ipykernel\_31364\2301388344.py:7:

SettingWithCopyWarning:

A value is trying to be set on a copy of a slice from a DataFrame

See the caveats in the documentation: [https://pandas.pydata.org/pandas-docs/stable/user\\_guide/indexing.html#returning-a-view-versus-a-copy](https://pandas.pydata.org/pandas-docs/stable/user_guide/indexing.html#returning-a-view-versus-a-copy)

```
dat_list['destenation'][i] = os.path.join(directory,
str(str(i+1)+'_lig'+str(i+1)+'_'))
```

C:\Users\aleks\anaconda3\envs\cheminf\_gpu\lib\site-

packages\pandas\core\indexing.py:1637: SettingWithCopyWarning:

A value is trying to be set on a copy of a slice from a DataFrame

See the caveats in the documentation: [https://pandas.pydata.org/pandas-docs/stable/user\\_guide/indexing.html#returning-a-view-versus-a-copy](https://pandas.pydata.org/pandas-docs/stable/user_guide/indexing.html#returning-a-view-versus-a-copy)

```
self._setitem_single_block(indexer, value, name)
```

```
[8]: tmp_ = pd.DataFrame(data=list_dir, columns=['Name'])
tmp_.to_excel('to_be_moved_to.xlsx')
list_dir
```

```
[8]: ['C:\\Users\\aleks\\Documents\\GitHub\\Kolchicyna\\Molecular docking\\1_lig1_',
'C:\\Users\\aleks\\Documents\\GitHub\\Kolchicyna\\Molecular docking\\2_lig2_',
'C:\\Users\\aleks\\Documents\\GitHub\\Kolchicyna\\Molecular docking\\3_lig3_',
'C:\\Users\\aleks\\Documents\\GitHub\\Kolchicyna\\Molecular docking\\4_lig4_',
'C:\\Users\\aleks\\Documents\\GitHub\\Kolchicyna\\Molecular docking\\5_lig5_',
'C:\\Users\\aleks\\Documents\\GitHub\\Kolchicyna\\Molecular docking\\6_lig6_',
'C:\\Users\\aleks\\Documents\\GitHub\\Kolchicyna\\Molecular docking\\7_lig7_',
'C:\\Users\\aleks\\Documents\\GitHub\\Kolchicyna\\Molecular docking\\8_lig8_',
'C:\\Users\\aleks\\Documents\\GitHub\\Kolchicyna\\Molecular docking\\9_lig9_',
'C:\\Users\\aleks\\Documents\\GitHub\\Kolchicyna\\Molecular
```

docking\\10\_lig10\_',  
'C:\\Users\\aleks\\Documents\\GitHub\\Kolchicyna\\Molecular  
docking\\11\_lig11\_',  
'C:\\Users\\aleks\\Documents\\GitHub\\Kolchicyna\\Molecular  
docking\\12\_lig12\_',  
'C:\\Users\\aleks\\Documents\\GitHub\\Kolchicyna\\Molecular  
docking\\13\_lig13\_',  
'C:\\Users\\aleks\\Documents\\GitHub\\Kolchicyna\\Molecular  
docking\\14\_lig14\_',  
'C:\\Users\\aleks\\Documents\\GitHub\\Kolchicyna\\Molecular  
docking\\15\_lig15\_',  
'C:\\Users\\aleks\\Documents\\GitHub\\Kolchicyna\\Molecular  
docking\\16\_lig16\_',  
'C:\\Users\\aleks\\Documents\\GitHub\\Kolchicyna\\Molecular  
docking\\17\_lig17\_',  
'C:\\Users\\aleks\\Documents\\GitHub\\Kolchicyna\\Molecular  
docking\\18\_lig18\_',  
'C:\\Users\\aleks\\Documents\\GitHub\\Kolchicyna\\Molecular  
docking\\19\_lig19\_',  
'C:\\Users\\aleks\\Documents\\GitHub\\Kolchicyna\\Molecular  
docking\\20\_lig20\_',  
'C:\\Users\\aleks\\Documents\\GitHub\\Kolchicyna\\Molecular  
docking\\21\_lig21\_',  
'C:\\Users\\aleks\\Documents\\GitHub\\Kolchicyna\\Molecular  
docking\\22\_lig22\_',  
'C:\\Users\\aleks\\Documents\\GitHub\\Kolchicyna\\Molecular  
docking\\23\_lig23\_',  
'C:\\Users\\aleks\\Documents\\GitHub\\Kolchicyna\\Molecular  
docking\\24\_lig24\_',  
'C:\\Users\\aleks\\Documents\\GitHub\\Kolchicyna\\Molecular  
docking\\25\_lig25\_',  
'C:\\Users\\aleks\\Documents\\GitHub\\Kolchicyna\\Molecular  
docking\\26\_lig26\_',  
'C:\\Users\\aleks\\Documents\\GitHub\\Kolchicyna\\Molecular  
docking\\27\_lig27\_',  
'C:\\Users\\aleks\\Documents\\GitHub\\Kolchicyna\\Molecular  
docking\\28\_lig28\_',  
'C:\\Users\\aleks\\Documents\\GitHub\\Kolchicyna\\Molecular  
docking\\29\_lig29\_',  
'C:\\Users\\aleks\\Documents\\GitHub\\Kolchicyna\\Molecular  
docking\\30\_lig30\_',  
'C:\\Users\\aleks\\Documents\\GitHub\\Kolchicyna\\Molecular  
docking\\31\_lig31\_',  
'C:\\Users\\aleks\\Documents\\GitHub\\Kolchicyna\\Molecular  
docking\\32\_lig32\_',  
'C:\\Users\\aleks\\Documents\\GitHub\\Kolchicyna\\Molecular  
docking\\33\_lig33\_',



'C:\\Users\\aleks\\Documents\\GitHub\\Kolchicyna\\Molecular docking\\34\_lig34\_',  
'C:\\Users\\aleks\\Documents\\GitHub\\Kolchicyna\\Molecular docking\\35\_lig35\_',  
'C:\\Users\\aleks\\Documents\\GitHub\\Kolchicyna\\Molecular docking\\36\_lig36\_',  
'C:\\Users\\aleks\\Documents\\GitHub\\Kolchicyna\\Molecular docking\\37\_lig37\_',  
'C:\\Users\\aleks\\Documents\\GitHub\\Kolchicyna\\Molecular docking\\38\_lig38\_',  
'C:\\Users\\aleks\\Documents\\GitHub\\Kolchicyna\\Molecular docking\\39\_lig39\_',  
'C:\\Users\\aleks\\Documents\\GitHub\\Kolchicyna\\Molecular docking\\40\_lig40\_',  
'C:\\Users\\aleks\\Documents\\GitHub\\Kolchicyna\\Molecular docking\\41\_lig41\_',  
'C:\\Users\\aleks\\Documents\\GitHub\\Kolchicyna\\Molecular docking\\42\_lig42\_',  
'C:\\Users\\aleks\\Documents\\GitHub\\Kolchicyna\\Molecular docking\\43\_lig43\_',  
'C:\\Users\\aleks\\Documents\\GitHub\\Kolchicyna\\Molecular docking\\44\_lig44\_',  
'C:\\Users\\aleks\\Documents\\GitHub\\Kolchicyna\\Molecular docking\\45\_lig45\_',  
'C:\\Users\\aleks\\Documents\\GitHub\\Kolchicyna\\Molecular docking\\46\_lig46\_',  
'C:\\Users\\aleks\\Documents\\GitHub\\Kolchicyna\\Molecular docking\\47\_lig47\_',  
'C:\\Users\\aleks\\Documents\\GitHub\\Kolchicyna\\Molecular docking\\48\_lig48\_',  
'C:\\Users\\aleks\\Documents\\GitHub\\Kolchicyna\\Molecular docking\\49\_lig49\_',  
'C:\\Users\\aleks\\Documents\\GitHub\\Kolchicyna\\Molecular docking\\50\_lig50\_',  
'C:\\Users\\aleks\\Documents\\GitHub\\Kolchicyna\\Molecular docking\\51\_lig51\_',  
'C:\\Users\\aleks\\Documents\\GitHub\\Kolchicyna\\Molecular docking\\52\_lig52\_',  
'C:\\Users\\aleks\\Documents\\GitHub\\Kolchicyna\\Molecular docking\\53\_lig53\_',  
'C:\\Users\\aleks\\Documents\\GitHub\\Kolchicyna\\Molecular docking\\54\_lig54\_',  
'C:\\Users\\aleks\\Documents\\GitHub\\Kolchicyna\\Molecular docking\\55\_lig55\_',  
'C:\\Users\\aleks\\Documents\\GitHub\\Kolchicyna\\Molecular docking\\56\_lig56\_',  
'C:\\Users\\aleks\\Documents\\GitHub\\Kolchicyna\\Molecular

docking\\57\_lig57\_',  
'C:\\Users\\aleks\\Documents\\GitHub\\Kolchicyna\\Molecular  
docking\\58\_lig58\_',  
'C:\\Users\\aleks\\Documents\\GitHub\\Kolchicyna\\Molecular  
docking\\59\_lig59\_',  
'C:\\Users\\aleks\\Documents\\GitHub\\Kolchicyna\\Molecular  
docking\\60\_lig60\_',  
'C:\\Users\\aleks\\Documents\\GitHub\\Kolchicyna\\Molecular  
docking\\61\_lig61\_',  
'C:\\Users\\aleks\\Documents\\GitHub\\Kolchicyna\\Molecular  
docking\\62\_lig62\_',  
'C:\\Users\\aleks\\Documents\\GitHub\\Kolchicyna\\Molecular  
docking\\63\_lig63\_',  
'C:\\Users\\aleks\\Documents\\GitHub\\Kolchicyna\\Molecular  
docking\\64\_lig64\_',  
'C:\\Users\\aleks\\Documents\\GitHub\\Kolchicyna\\Molecular  
docking\\65\_lig65\_',  
'C:\\Users\\aleks\\Documents\\GitHub\\Kolchicyna\\Molecular  
docking\\66\_lig66\_',  
'C:\\Users\\aleks\\Documents\\GitHub\\Kolchicyna\\Molecular  
docking\\67\_lig67\_',  
'C:\\Users\\aleks\\Documents\\GitHub\\Kolchicyna\\Molecular  
docking\\68\_lig68\_',  
'C:\\Users\\aleks\\Documents\\GitHub\\Kolchicyna\\Molecular  
docking\\69\_lig69\_',  
'C:\\Users\\aleks\\Documents\\GitHub\\Kolchicyna\\Molecular  
docking\\70\_lig70\_',  
'C:\\Users\\aleks\\Documents\\GitHub\\Kolchicyna\\Molecular  
docking\\71\_lig71\_',  
'C:\\Users\\aleks\\Documents\\GitHub\\Kolchicyna\\Molecular  
docking\\72\_lig72\_',  
'C:\\Users\\aleks\\Documents\\GitHub\\Kolchicyna\\Molecular  
docking\\73\_lig73\_',  
'C:\\Users\\aleks\\Documents\\GitHub\\Kolchicyna\\Molecular  
docking\\74\_lig74\_',  
'C:\\Users\\aleks\\Documents\\GitHub\\Kolchicyna\\Molecular  
docking\\75\_lig75\_',  
'C:\\Users\\aleks\\Documents\\GitHub\\Kolchicyna\\Molecular  
docking\\76\_lig76\_',  
'C:\\Users\\aleks\\Documents\\GitHub\\Kolchicyna\\Molecular  
docking\\77\_lig77\_',  
'C:\\Users\\aleks\\Documents\\GitHub\\Kolchicyna\\Molecular  
docking\\78\_lig78\_',  
'C:\\Users\\aleks\\Documents\\GitHub\\Kolchicyna\\Molecular  
docking\\79\_lig79\_',  
'C:\\Users\\aleks\\Documents\\GitHub\\Kolchicyna\\Molecular  
docking\\80\_lig80\_',

'C:\\Users\\aleks\\Documents\\GitHub\\Kolchicyna\\Molecular  
docking\\81\_lig81\_',  
'C:\\Users\\aleks\\Documents\\GitHub\\Kolchicyna\\Molecular  
docking\\82\_lig82\_',  
'C:\\Users\\aleks\\Documents\\GitHub\\Kolchicyna\\Molecular  
docking\\83\_lig83\_',  
'C:\\Users\\aleks\\Documents\\GitHub\\Kolchicyna\\Molecular  
docking\\84\_lig84\_',  
'C:\\Users\\aleks\\Documents\\GitHub\\Kolchicyna\\Molecular  
docking\\85\_lig85\_',  
'C:\\Users\\aleks\\Documents\\GitHub\\Kolchicyna\\Molecular  
docking\\86\_lig86\_',  
'C:\\Users\\aleks\\Documents\\GitHub\\Kolchicyna\\Molecular  
docking\\87\_lig87\_',  
'C:\\Users\\aleks\\Documents\\GitHub\\Kolchicyna\\Molecular  
docking\\88\_lig88\_',  
'C:\\Users\\aleks\\Documents\\GitHub\\Kolchicyna\\Molecular  
docking\\89\_lig89\_',  
'C:\\Users\\aleks\\Documents\\GitHub\\Kolchicyna\\Molecular  
docking\\90\_lig90\_',  
'C:\\Users\\aleks\\Documents\\GitHub\\Kolchicyna\\Molecular  
docking\\91\_lig91\_',  
'C:\\Users\\aleks\\Documents\\GitHub\\Kolchicyna\\Molecular  
docking\\92\_lig92\_',  
'C:\\Users\\aleks\\Documents\\GitHub\\Kolchicyna\\Molecular  
docking\\93\_lig93\_',  
'C:\\Users\\aleks\\Documents\\GitHub\\Kolchicyna\\Molecular  
docking\\94\_lig94\_',  
'C:\\Users\\aleks\\Documents\\GitHub\\Kolchicyna\\Molecular  
docking\\95\_lig95\_',  
'C:\\Users\\aleks\\Documents\\GitHub\\Kolchicyna\\Molecular  
docking\\96\_lig96\_',  
'C:\\Users\\aleks\\Documents\\GitHub\\Kolchicyna\\Molecular  
docking\\97\_lig97\_',  
'C:\\Users\\aleks\\Documents\\GitHub\\Kolchicyna\\Molecular  
docking\\98\_lig98\_',  
'C:\\Users\\aleks\\Documents\\GitHub\\Kolchicyna\\Molecular  
docking\\99\_lig99\_',  
'C:\\Users\\aleks\\Documents\\GitHub\\Kolchicyna\\Molecular  
docking\\100\_lig100\_',  
'C:\\Users\\aleks\\Documents\\GitHub\\Kolchicyna\\Molecular  
docking\\101\_lig101\_',  
'C:\\Users\\aleks\\Documents\\GitHub\\Kolchicyna\\Molecular  
docking\\102\_lig102\_',  
'C:\\Users\\aleks\\Documents\\GitHub\\Kolchicyna\\Molecular  
docking\\103\_lig103\_',  
'C:\\Users\\aleks\\Documents\\GitHub\\Kolchicyna\\Molecular

docking\\104\_lig104\_',  
'C:\\Users\\aleks\\Documents\\GitHub\\Kolchicyna\\Molecular  
docking\\105\_lig105\_',  
'C:\\Users\\aleks\\Documents\\GitHub\\Kolchicyna\\Molecular  
docking\\106\_lig106\_',  
'C:\\Users\\aleks\\Documents\\GitHub\\Kolchicyna\\Molecular  
docking\\107\_lig107\_',  
'C:\\Users\\aleks\\Documents\\GitHub\\Kolchicyna\\Molecular  
docking\\108\_lig108\_',  
'C:\\Users\\aleks\\Documents\\GitHub\\Kolchicyna\\Molecular  
docking\\109\_lig109\_',  
'C:\\Users\\aleks\\Documents\\GitHub\\Kolchicyna\\Molecular  
docking\\110\_lig110\_',  
'C:\\Users\\aleks\\Documents\\GitHub\\Kolchicyna\\Molecular  
docking\\111\_lig111\_',  
'C:\\Users\\aleks\\Documents\\GitHub\\Kolchicyna\\Molecular  
docking\\112\_lig112\_',  
'C:\\Users\\aleks\\Documents\\GitHub\\Kolchicyna\\Molecular  
docking\\113\_lig113\_',  
'C:\\Users\\aleks\\Documents\\GitHub\\Kolchicyna\\Molecular  
docking\\114\_lig114\_',  
'C:\\Users\\aleks\\Documents\\GitHub\\Kolchicyna\\Molecular  
docking\\115\_lig115\_',  
'C:\\Users\\aleks\\Documents\\GitHub\\Kolchicyna\\Molecular  
docking\\116\_lig116\_',  
'C:\\Users\\aleks\\Documents\\GitHub\\Kolchicyna\\Molecular  
docking\\117\_lig117\_',  
'C:\\Users\\aleks\\Documents\\GitHub\\Kolchicyna\\Molecular  
docking\\118\_lig118\_',  
'C:\\Users\\aleks\\Documents\\GitHub\\Kolchicyna\\Molecular  
docking\\119\_lig119\_',  
'C:\\Users\\aleks\\Documents\\GitHub\\Kolchicyna\\Molecular  
docking\\120\_lig120\_',  
'C:\\Users\\aleks\\Documents\\GitHub\\Kolchicyna\\Molecular  
docking\\121\_lig121\_',  
'C:\\Users\\aleks\\Documents\\GitHub\\Kolchicyna\\Molecular  
docking\\122\_lig122\_',  
'C:\\Users\\aleks\\Documents\\GitHub\\Kolchicyna\\Molecular  
docking\\123\_lig123\_',  
'C:\\Users\\aleks\\Documents\\GitHub\\Kolchicyna\\Molecular  
docking\\124\_lig124\_',  
'C:\\Users\\aleks\\Documents\\GitHub\\Kolchicyna\\Molecular  
docking\\125\_lig125\_',  
'C:\\Users\\aleks\\Documents\\GitHub\\Kolchicyna\\Molecular  
docking\\126\_lig126\_',  
'C:\\Users\\aleks\\Documents\\GitHub\\Kolchicyna\\Molecular  
docking\\127\_lig127\_',

'C:\\Users\\aleks\\Documents\\GitHub\\Kolchicyna\\Molecular docking\\128\_lig128\_',  
'C:\\Users\\aleks\\Documents\\GitHub\\Kolchicyna\\Molecular docking\\129\_lig129\_',  
'C:\\Users\\aleks\\Documents\\GitHub\\Kolchicyna\\Molecular docking\\130\_lig130\_',  
'C:\\Users\\aleks\\Documents\\GitHub\\Kolchicyna\\Molecular docking\\131\_lig131\_',  
'C:\\Users\\aleks\\Documents\\GitHub\\Kolchicyna\\Molecular docking\\132\_lig132\_',  
'C:\\Users\\aleks\\Documents\\GitHub\\Kolchicyna\\Molecular docking\\133\_lig133\_',  
'C:\\Users\\aleks\\Documents\\GitHub\\Kolchicyna\\Molecular docking\\134\_lig134\_',  
'C:\\Users\\aleks\\Documents\\GitHub\\Kolchicyna\\Molecular docking\\135\_lig135\_',  
'C:\\Users\\aleks\\Documents\\GitHub\\Kolchicyna\\Molecular docking\\136\_lig136\_',  
'C:\\Users\\aleks\\Documents\\GitHub\\Kolchicyna\\Molecular docking\\137\_lig137\_',  
'C:\\Users\\aleks\\Documents\\GitHub\\Kolchicyna\\Molecular docking\\138\_lig138\_',  
'C:\\Users\\aleks\\Documents\\GitHub\\Kolchicyna\\Molecular docking\\139\_lig139\_',  
'C:\\Users\\aleks\\Documents\\GitHub\\Kolchicyna\\Molecular docking\\140\_lig140\_',  
'C:\\Users\\aleks\\Documents\\GitHub\\Kolchicyna\\Molecular docking\\141\_lig141\_',  
'C:\\Users\\aleks\\Documents\\GitHub\\Kolchicyna\\Molecular docking\\142\_lig142\_',  
'C:\\Users\\aleks\\Documents\\GitHub\\Kolchicyna\\Molecular docking\\143\_lig143\_',  
'C:\\Users\\aleks\\Documents\\GitHub\\Kolchicyna\\Molecular docking\\144\_lig144\_',  
'C:\\Users\\aleks\\Documents\\GitHub\\Kolchicyna\\Molecular docking\\145\_lig145\_',  
'C:\\Users\\aleks\\Documents\\GitHub\\Kolchicyna\\Molecular docking\\146\_lig146\_',  
'C:\\Users\\aleks\\Documents\\GitHub\\Kolchicyna\\Molecular docking\\147\_lig147\_',  
'C:\\Users\\aleks\\Documents\\GitHub\\Kolchicyna\\Molecular docking\\148\_lig148\_',  
'C:\\Users\\aleks\\Documents\\GitHub\\Kolchicyna\\Molecular docking\\149\_lig149\_',  
'C:\\Users\\aleks\\Documents\\GitHub\\Kolchicyna\\Molecular docking\\150\_lig150\_',  
'C:\\Users\\aleks\\Documents\\GitHub\\Kolchicyna\\Molecular

docking\\151\_lig151\_',  
'C:\\Users\\aleks\\Documents\\GitHub\\Kolchicyna\\Molecular  
docking\\152\_lig152\_',  
'C:\\Users\\aleks\\Documents\\GitHub\\Kolchicyna\\Molecular  
docking\\153\_lig153\_',  
'C:\\Users\\aleks\\Documents\\GitHub\\Kolchicyna\\Molecular  
docking\\154\_lig154\_',  
'C:\\Users\\aleks\\Documents\\GitHub\\Kolchicyna\\Molecular  
docking\\155\_lig155\_',  
'C:\\Users\\aleks\\Documents\\GitHub\\Kolchicyna\\Molecular  
docking\\156\_lig156\_',  
'C:\\Users\\aleks\\Documents\\GitHub\\Kolchicyna\\Molecular  
docking\\157\_lig157\_',  
'C:\\Users\\aleks\\Documents\\GitHub\\Kolchicyna\\Molecular  
docking\\158\_lig158\_',  
'C:\\Users\\aleks\\Documents\\GitHub\\Kolchicyna\\Molecular  
docking\\159\_lig159\_',  
'C:\\Users\\aleks\\Documents\\GitHub\\Kolchicyna\\Molecular  
docking\\160\_lig160\_',  
'C:\\Users\\aleks\\Documents\\GitHub\\Kolchicyna\\Molecular  
docking\\161\_lig161\_',  
'C:\\Users\\aleks\\Documents\\GitHub\\Kolchicyna\\Molecular  
docking\\162\_lig162\_',  
'C:\\Users\\aleks\\Documents\\GitHub\\Kolchicyna\\Molecular  
docking\\163\_lig163\_',  
'C:\\Users\\aleks\\Documents\\GitHub\\Kolchicyna\\Molecular  
docking\\164\_lig164\_',  
'C:\\Users\\aleks\\Documents\\GitHub\\Kolchicyna\\Molecular  
docking\\165\_lig165\_',  
'C:\\Users\\aleks\\Documents\\GitHub\\Kolchicyna\\Molecular  
docking\\166\_lig166\_',  
'C:\\Users\\aleks\\Documents\\GitHub\\Kolchicyna\\Molecular  
docking\\167\_lig167\_',  
'C:\\Users\\aleks\\Documents\\GitHub\\Kolchicyna\\Molecular  
docking\\168\_lig168\_',  
'C:\\Users\\aleks\\Documents\\GitHub\\Kolchicyna\\Molecular  
docking\\169\_lig169\_',  
'C:\\Users\\aleks\\Documents\\GitHub\\Kolchicyna\\Molecular  
docking\\170\_lig170\_',  
'C:\\Users\\aleks\\Documents\\GitHub\\Kolchicyna\\Molecular  
docking\\171\_lig171\_',  
'C:\\Users\\aleks\\Documents\\GitHub\\Kolchicyna\\Molecular  
docking\\172\_lig172\_',  
'C:\\Users\\aleks\\Documents\\GitHub\\Kolchicyna\\Molecular  
docking\\173\_lig173\_',  
'C:\\Users\\aleks\\Documents\\GitHub\\Kolchicyna\\Molecular  
docking\\174\_lig174\_',

'C:\\Users\\aleks\\Documents\\GitHub\\Kolchicyna\\Molecular docking\\175\_lig175\_',  
'C:\\Users\\aleks\\Documents\\GitHub\\Kolchicyna\\Molecular docking\\176\_lig176\_',  
'C:\\Users\\aleks\\Documents\\GitHub\\Kolchicyna\\Molecular docking\\177\_lig177\_',  
'C:\\Users\\aleks\\Documents\\GitHub\\Kolchicyna\\Molecular docking\\178\_lig178\_',  
'C:\\Users\\aleks\\Documents\\GitHub\\Kolchicyna\\Molecular docking\\179\_lig179\_',  
'C:\\Users\\aleks\\Documents\\GitHub\\Kolchicyna\\Molecular docking\\180\_lig180\_',  
'C:\\Users\\aleks\\Documents\\GitHub\\Kolchicyna\\Molecular docking\\181\_lig181\_',  
'C:\\Users\\aleks\\Documents\\GitHub\\Kolchicyna\\Molecular docking\\182\_lig182\_',  
'C:\\Users\\aleks\\Documents\\GitHub\\Kolchicyna\\Molecular docking\\183\_lig183\_',  
'C:\\Users\\aleks\\Documents\\GitHub\\Kolchicyna\\Molecular docking\\184\_lig184\_',  
'C:\\Users\\aleks\\Documents\\GitHub\\Kolchicyna\\Molecular docking\\185\_lig185\_',  
'C:\\Users\\aleks\\Documents\\GitHub\\Kolchicyna\\Molecular docking\\186\_lig186\_',  
'C:\\Users\\aleks\\Documents\\GitHub\\Kolchicyna\\Molecular docking\\187\_lig187\_',  
'C:\\Users\\aleks\\Documents\\GitHub\\Kolchicyna\\Molecular docking\\188\_lig188\_',  
'C:\\Users\\aleks\\Documents\\GitHub\\Kolchicyna\\Molecular docking\\189\_lig189\_',  
'C:\\Users\\aleks\\Documents\\GitHub\\Kolchicyna\\Molecular docking\\190\_lig190\_',  
'C:\\Users\\aleks\\Documents\\GitHub\\Kolchicyna\\Molecular docking\\191\_lig191\_',  
'C:\\Users\\aleks\\Documents\\GitHub\\Kolchicyna\\Molecular docking\\192\_lig192\_',  
'C:\\Users\\aleks\\Documents\\GitHub\\Kolchicyna\\Molecular docking\\193\_lig193\_',  
'C:\\Users\\aleks\\Documents\\GitHub\\Kolchicyna\\Molecular docking\\194\_lig194\_',  
'C:\\Users\\aleks\\Documents\\GitHub\\Kolchicyna\\Molecular docking\\195\_lig195\_',  
'C:\\Users\\aleks\\Documents\\GitHub\\Kolchicyna\\Molecular docking\\196\_lig196\_',  
'C:\\Users\\aleks\\Documents\\GitHub\\Kolchicyna\\Molecular docking\\197\_lig197\_',  
'C:\\Users\\aleks\\Documents\\GitHub\\Kolchicyna\\Molecular

docking\\198\_lig198\_',  
'C:\\Users\\aleks\\Documents\\GitHub\\Kolchicyna\\Molecular  
docking\\199\_lig199\_',  
'C:\\Users\\aleks\\Documents\\GitHub\\Kolchicyna\\Molecular  
docking\\200\_lig200\_',  
'C:\\Users\\aleks\\Documents\\GitHub\\Kolchicyna\\Molecular  
docking\\201\_lig201\_',  
'C:\\Users\\aleks\\Documents\\GitHub\\Kolchicyna\\Molecular  
docking\\202\_lig202\_',  
'C:\\Users\\aleks\\Documents\\GitHub\\Kolchicyna\\Molecular  
docking\\203\_lig203\_',  
'C:\\Users\\aleks\\Documents\\GitHub\\Kolchicyna\\Molecular  
docking\\204\_lig204\_',  
'C:\\Users\\aleks\\Documents\\GitHub\\Kolchicyna\\Molecular  
docking\\205\_lig205\_',  
'C:\\Users\\aleks\\Documents\\GitHub\\Kolchicyna\\Molecular  
docking\\206\_lig206\_',  
'C:\\Users\\aleks\\Documents\\GitHub\\Kolchicyna\\Molecular  
docking\\207\_lig207\_',  
'C:\\Users\\aleks\\Documents\\GitHub\\Kolchicyna\\Molecular  
docking\\208\_lig208\_',  
'C:\\Users\\aleks\\Documents\\GitHub\\Kolchicyna\\Molecular  
docking\\209\_lig209\_',  
'C:\\Users\\aleks\\Documents\\GitHub\\Kolchicyna\\Molecular  
docking\\210\_lig210\_',  
'C:\\Users\\aleks\\Documents\\GitHub\\Kolchicyna\\Molecular  
docking\\211\_lig211\_',  
'C:\\Users\\aleks\\Documents\\GitHub\\Kolchicyna\\Molecular  
docking\\212\_lig212\_',  
'C:\\Users\\aleks\\Documents\\GitHub\\Kolchicyna\\Molecular  
docking\\213\_lig213\_',  
'C:\\Users\\aleks\\Documents\\GitHub\\Kolchicyna\\Molecular  
docking\\214\_lig214\_',  
'C:\\Users\\aleks\\Documents\\GitHub\\Kolchicyna\\Molecular  
docking\\215\_lig215\_',  
'C:\\Users\\aleks\\Documents\\GitHub\\Kolchicyna\\Molecular  
docking\\216\_lig216\_',  
'C:\\Users\\aleks\\Documents\\GitHub\\Kolchicyna\\Molecular  
docking\\217\_lig217\_',  
'C:\\Users\\aleks\\Documents\\GitHub\\Kolchicyna\\Molecular  
docking\\218\_lig218\_',  
'C:\\Users\\aleks\\Documents\\GitHub\\Kolchicyna\\Molecular  
docking\\219\_lig219\_',  
'C:\\Users\\aleks\\Documents\\GitHub\\Kolchicyna\\Molecular  
docking\\220\_lig220\_',  
'C:\\Users\\aleks\\Documents\\GitHub\\Kolchicyna\\Molecular  
docking\\221\_lig221\_',



'C:\\Users\\aleks\\Documents\\GitHub\\Kolchicyna\\Molecular  
docking\\222\_lig222\_',  
'C:\\Users\\aleks\\Documents\\GitHub\\Kolchicyna\\Molecular  
docking\\223\_lig223\_',  
'C:\\Users\\aleks\\Documents\\GitHub\\Kolchicyna\\Molecular  
docking\\224\_lig224\_',  
'C:\\Users\\aleks\\Documents\\GitHub\\Kolchicyna\\Molecular  
docking\\225\_lig225\_',  
'C:\\Users\\aleks\\Documents\\GitHub\\Kolchicyna\\Molecular  
docking\\226\_lig226\_',  
'C:\\Users\\aleks\\Documents\\GitHub\\Kolchicyna\\Molecular  
docking\\227\_lig227\_',  
'C:\\Users\\aleks\\Documents\\GitHub\\Kolchicyna\\Molecular  
docking\\228\_lig228\_',  
'C:\\Users\\aleks\\Documents\\GitHub\\Kolchicyna\\Molecular  
docking\\229\_lig229\_',  
'C:\\Users\\aleks\\Documents\\GitHub\\Kolchicyna\\Molecular  
docking\\230\_lig230\_',  
'C:\\Users\\aleks\\Documents\\GitHub\\Kolchicyna\\Molecular  
docking\\231\_lig231\_',  
'C:\\Users\\aleks\\Documents\\GitHub\\Kolchicyna\\Molecular  
docking\\232\_lig232\_',  
'C:\\Users\\aleks\\Documents\\GitHub\\Kolchicyna\\Molecular  
docking\\233\_lig233\_',  
'C:\\Users\\aleks\\Documents\\GitHub\\Kolchicyna\\Molecular  
docking\\234\_lig234\_',  
'C:\\Users\\aleks\\Documents\\GitHub\\Kolchicyna\\Molecular  
docking\\235\_lig235\_',  
'C:\\Users\\aleks\\Documents\\GitHub\\Kolchicyna\\Molecular  
docking\\236\_lig236\_',  
'C:\\Users\\aleks\\Documents\\GitHub\\Kolchicyna\\Molecular  
docking\\237\_lig237\_',  
'C:\\Users\\aleks\\Documents\\GitHub\\Kolchicyna\\Molecular  
docking\\238\_lig238\_',  
'C:\\Users\\aleks\\Documents\\GitHub\\Kolchicyna\\Molecular  
docking\\239\_lig239\_',  
'C:\\Users\\aleks\\Documents\\GitHub\\Kolchicyna\\Molecular  
docking\\240\_lig240\_',  
'C:\\Users\\aleks\\Documents\\GitHub\\Kolchicyna\\Molecular  
docking\\241\_lig241\_',  
'C:\\Users\\aleks\\Documents\\GitHub\\Kolchicyna\\Molecular  
docking\\242\_lig242\_',  
'C:\\Users\\aleks\\Documents\\GitHub\\Kolchicyna\\Molecular  
docking\\243\_lig243\_',  
'C:\\Users\\aleks\\Documents\\GitHub\\Kolchicyna\\Molecular  
docking\\244\_lig244\_',  
'C:\\Users\\aleks\\Documents\\GitHub\\Kolchicyna\\Molecular

docking\\245\_lig245\_',  
'C:\\Users\\aleks\\Documents\\GitHub\\Kolchicyna\\Molecular  
docking\\246\_lig246\_',  
'C:\\Users\\aleks\\Documents\\GitHub\\Kolchicyna\\Molecular  
docking\\247\_lig247\_',  
'C:\\Users\\aleks\\Documents\\GitHub\\Kolchicyna\\Molecular  
docking\\248\_lig248\_',  
'C:\\Users\\aleks\\Documents\\GitHub\\Kolchicyna\\Molecular  
docking\\249\_lig249\_',  
'C:\\Users\\aleks\\Documents\\GitHub\\Kolchicyna\\Molecular  
docking\\250\_lig250\_',  
'C:\\Users\\aleks\\Documents\\GitHub\\Kolchicyna\\Molecular  
docking\\251\_lig251\_',  
'C:\\Users\\aleks\\Documents\\GitHub\\Kolchicyna\\Molecular  
docking\\252\_lig252\_',  
'C:\\Users\\aleks\\Documents\\GitHub\\Kolchicyna\\Molecular  
docking\\253\_lig253\_',  
'C:\\Users\\aleks\\Documents\\GitHub\\Kolchicyna\\Molecular  
docking\\254\_lig254\_',  
'C:\\Users\\aleks\\Documents\\GitHub\\Kolchicyna\\Molecular  
docking\\255\_lig255\_',  
'C:\\Users\\aleks\\Documents\\GitHub\\Kolchicyna\\Molecular  
docking\\256\_lig256\_',  
'C:\\Users\\aleks\\Documents\\GitHub\\Kolchicyna\\Molecular  
docking\\257\_lig257\_',  
'C:\\Users\\aleks\\Documents\\GitHub\\Kolchicyna\\Molecular  
docking\\258\_lig258\_',  
'C:\\Users\\aleks\\Documents\\GitHub\\Kolchicyna\\Molecular  
docking\\259\_lig259\_',  
'C:\\Users\\aleks\\Documents\\GitHub\\Kolchicyna\\Molecular  
docking\\260\_lig260\_',  
'C:\\Users\\aleks\\Documents\\GitHub\\Kolchicyna\\Molecular  
docking\\261\_lig261\_',  
'C:\\Users\\aleks\\Documents\\GitHub\\Kolchicyna\\Molecular  
docking\\262\_lig262\_',  
'C:\\Users\\aleks\\Documents\\GitHub\\Kolchicyna\\Molecular  
docking\\263\_lig263\_',  
'C:\\Users\\aleks\\Documents\\GitHub\\Kolchicyna\\Molecular  
docking\\264\_lig264\_',  
'C:\\Users\\aleks\\Documents\\GitHub\\Kolchicyna\\Molecular  
docking\\265\_lig265\_',  
'C:\\Users\\aleks\\Documents\\GitHub\\Kolchicyna\\Molecular  
docking\\266\_lig266\_',  
'C:\\Users\\aleks\\Documents\\GitHub\\Kolchicyna\\Molecular  
docking\\267\_lig267\_',  
'C:\\Users\\aleks\\Documents\\GitHub\\Kolchicyna\\Molecular  
docking\\268\_lig268\_',

'C:\\Users\\aleks\\Documents\\GitHub\\Kolchicyna\\Molecular docking\\269\_lig269\_',  
'C:\\Users\\aleks\\Documents\\GitHub\\Kolchicyna\\Molecular docking\\270\_lig270\_',  
'C:\\Users\\aleks\\Documents\\GitHub\\Kolchicyna\\Molecular docking\\271\_lig271\_',  
'C:\\Users\\aleks\\Documents\\GitHub\\Kolchicyna\\Molecular docking\\272\_lig272\_',  
'C:\\Users\\aleks\\Documents\\GitHub\\Kolchicyna\\Molecular docking\\273\_lig273\_',  
'C:\\Users\\aleks\\Documents\\GitHub\\Kolchicyna\\Molecular docking\\274\_lig274\_',  
'C:\\Users\\aleks\\Documents\\GitHub\\Kolchicyna\\Molecular docking\\275\_lig275\_',  
'C:\\Users\\aleks\\Documents\\GitHub\\Kolchicyna\\Molecular docking\\276\_lig276\_',  
'C:\\Users\\aleks\\Documents\\GitHub\\Kolchicyna\\Molecular docking\\277\_lig277\_',  
'C:\\Users\\aleks\\Documents\\GitHub\\Kolchicyna\\Molecular docking\\278\_lig278\_',  
'C:\\Users\\aleks\\Documents\\GitHub\\Kolchicyna\\Molecular docking\\279\_lig279\_',  
'C:\\Users\\aleks\\Documents\\GitHub\\Kolchicyna\\Molecular docking\\280\_lig280\_',  
'C:\\Users\\aleks\\Documents\\GitHub\\Kolchicyna\\Molecular docking\\281\_lig281\_',  
'C:\\Users\\aleks\\Documents\\GitHub\\Kolchicyna\\Molecular docking\\282\_lig282\_',  
'C:\\Users\\aleks\\Documents\\GitHub\\Kolchicyna\\Molecular docking\\283\_lig283\_',  
'C:\\Users\\aleks\\Documents\\GitHub\\Kolchicyna\\Molecular docking\\284\_lig284\_',  
'C:\\Users\\aleks\\Documents\\GitHub\\Kolchicyna\\Molecular docking\\285\_lig285\_',  
'C:\\Users\\aleks\\Documents\\GitHub\\Kolchicyna\\Molecular docking\\286\_lig286\_',  
'C:\\Users\\aleks\\Documents\\GitHub\\Kolchicyna\\Molecular docking\\287\_lig287\_',  
'C:\\Users\\aleks\\Documents\\GitHub\\Kolchicyna\\Molecular docking\\288\_lig288\_',  
'C:\\Users\\aleks\\Documents\\GitHub\\Kolchicyna\\Molecular docking\\289\_lig289\_',  
'C:\\Users\\aleks\\Documents\\GitHub\\Kolchicyna\\Molecular docking\\290\_lig290\_',  
'C:\\Users\\aleks\\Documents\\GitHub\\Kolchicyna\\Molecular docking\\291\_lig291\_',  
'C:\\Users\\aleks\\Documents\\GitHub\\Kolchicyna\\Molecular

docking\\292\_lig292\_',  
'C:\\Users\\aleks\\Documents\\GitHub\\Kolchicyna\\Molecular  
docking\\293\_lig293\_',  
'C:\\Users\\aleks\\Documents\\GitHub\\Kolchicyna\\Molecular  
docking\\294\_lig294\_',  
'C:\\Users\\aleks\\Documents\\GitHub\\Kolchicyna\\Molecular  
docking\\295\_lig295\_',  
'C:\\Users\\aleks\\Documents\\GitHub\\Kolchicyna\\Molecular  
docking\\296\_lig296\_',  
'C:\\Users\\aleks\\Documents\\GitHub\\Kolchicyna\\Molecular  
docking\\297\_lig297\_',  
'C:\\Users\\aleks\\Documents\\GitHub\\Kolchicyna\\Molecular  
docking\\298\_lig298\_',  
'C:\\Users\\aleks\\Documents\\GitHub\\Kolchicyna\\Molecular  
docking\\299\_lig299\_',  
'C:\\Users\\aleks\\Documents\\GitHub\\Kolchicyna\\Molecular  
docking\\300\_lig300\_',  
'C:\\Users\\aleks\\Documents\\GitHub\\Kolchicyna\\Molecular  
docking\\301\_lig301\_',  
'C:\\Users\\aleks\\Documents\\GitHub\\Kolchicyna\\Molecular  
docking\\302\_lig302\_',  
'C:\\Users\\aleks\\Documents\\GitHub\\Kolchicyna\\Molecular  
docking\\303\_lig303\_',  
'C:\\Users\\aleks\\Documents\\GitHub\\Kolchicyna\\Molecular  
docking\\304\_lig304\_',  
'C:\\Users\\aleks\\Documents\\GitHub\\Kolchicyna\\Molecular  
docking\\305\_lig305\_',  
'C:\\Users\\aleks\\Documents\\GitHub\\Kolchicyna\\Molecular  
docking\\306\_lig306\_',  
'C:\\Users\\aleks\\Documents\\GitHub\\Kolchicyna\\Molecular  
docking\\307\_lig307\_',  
'C:\\Users\\aleks\\Documents\\GitHub\\Kolchicyna\\Molecular  
docking\\308\_lig308\_',  
'C:\\Users\\aleks\\Documents\\GitHub\\Kolchicyna\\Molecular  
docking\\309\_lig309\_',  
'C:\\Users\\aleks\\Documents\\GitHub\\Kolchicyna\\Molecular  
docking\\310\_lig310\_',  
'C:\\Users\\aleks\\Documents\\GitHub\\Kolchicyna\\Molecular  
docking\\311\_lig311\_',  
'C:\\Users\\aleks\\Documents\\GitHub\\Kolchicyna\\Molecular  
docking\\312\_lig312\_',  
'C:\\Users\\aleks\\Documents\\GitHub\\Kolchicyna\\Molecular  
docking\\313\_lig313\_',  
'C:\\Users\\aleks\\Documents\\GitHub\\Kolchicyna\\Molecular  
docking\\314\_lig314\_',  
'C:\\Users\\aleks\\Documents\\GitHub\\Kolchicyna\\Molecular  
docking\\315\_lig315\_',

'C:\\Users\\aleks\\Documents\\GitHub\\Kolchicyna\\Molecular  
docking\\316\_lig316\_',  
'C:\\Users\\aleks\\Documents\\GitHub\\Kolchicyna\\Molecular  
docking\\317\_lig317\_',  
'C:\\Users\\aleks\\Documents\\GitHub\\Kolchicyna\\Molecular  
docking\\318\_lig318\_',  
'C:\\Users\\aleks\\Documents\\GitHub\\Kolchicyna\\Molecular  
docking\\319\_lig319\_',  
'C:\\Users\\aleks\\Documents\\GitHub\\Kolchicyna\\Molecular  
docking\\320\_lig320\_',  
'C:\\Users\\aleks\\Documents\\GitHub\\Kolchicyna\\Molecular  
docking\\321\_lig321\_',  
'C:\\Users\\aleks\\Documents\\GitHub\\Kolchicyna\\Molecular  
docking\\322\_lig322\_',  
'C:\\Users\\aleks\\Documents\\GitHub\\Kolchicyna\\Molecular  
docking\\323\_lig323\_',  
'C:\\Users\\aleks\\Documents\\GitHub\\Kolchicyna\\Molecular  
docking\\324\_lig324\_',  
'C:\\Users\\aleks\\Documents\\GitHub\\Kolchicyna\\Molecular  
docking\\325\_lig325\_',  
'C:\\Users\\aleks\\Documents\\GitHub\\Kolchicyna\\Molecular  
docking\\326\_lig326\_',  
'C:\\Users\\aleks\\Documents\\GitHub\\Kolchicyna\\Molecular  
docking\\327\_lig327\_',  
'C:\\Users\\aleks\\Documents\\GitHub\\Kolchicyna\\Molecular  
docking\\328\_lig328\_',  
'C:\\Users\\aleks\\Documents\\GitHub\\Kolchicyna\\Molecular  
docking\\329\_lig329\_',  
'C:\\Users\\aleks\\Documents\\GitHub\\Kolchicyna\\Molecular  
docking\\330\_lig330\_',  
'C:\\Users\\aleks\\Documents\\GitHub\\Kolchicyna\\Molecular  
docking\\331\_lig331\_',  
'C:\\Users\\aleks\\Documents\\GitHub\\Kolchicyna\\Molecular  
docking\\332\_lig332\_',  
'C:\\Users\\aleks\\Documents\\GitHub\\Kolchicyna\\Molecular  
docking\\333\_lig333\_',  
'C:\\Users\\aleks\\Documents\\GitHub\\Kolchicyna\\Molecular  
docking\\334\_lig334\_',  
'C:\\Users\\aleks\\Documents\\GitHub\\Kolchicyna\\Molecular  
docking\\335\_lig335\_',  
'C:\\Users\\aleks\\Documents\\GitHub\\Kolchicyna\\Molecular  
docking\\336\_lig336\_',  
'C:\\Users\\aleks\\Documents\\GitHub\\Kolchicyna\\Molecular  
docking\\337\_lig337\_']

## 1.2 Create mol objects instead of SMILES

```
[9]: def create_PDB_from_SMILES(smiles, initial_dir, destination_dir, name):  
    try:  
        mol = Chem.MolFromSmiles(smiles)  
    except:  
        print("There is an error when preparing molecule: "+str(smiles))  
  
    try:  
        new_mol = Chem.AddHs(mol)  
        AllChem.EmbedMolecule(new_mol, randomSeed=0xf00d)  
    except:  
        print("Error:"+str(smiles))  
  
    try:  
        Chem.rdmolfiles.MolToPDBFile(new_mol,   
↪ "3D_structure"+'_'+str(name)+'_'+str(smiles[0:30])+'.pdb')  
        move_generated_structure(initial_dir,   
↪ "3D_structure"+'_'+str(name)+'_'+str(smiles[0:30])+'.pdb', destination_dir)  
    except:  
        print("Something went wrong while creating PDB file...")  
  
    return new_mol
```

```
[10]: def move_generated_structure(initial_dir, name_of_file, destination_dir):  
    ini = initial_dir+'\\'+name_of_file  
    des = destination_dir+'\\'+name_of_file  
    shutil.move(ini, des)  
    return print("Correctly moved...")
```

```
[11]: try:  
    for i, smile in enumerate(dat_list['SMILES']):  
        create_PDB_from_SMILES(smile, directory, dat_list['destination'][i],   
↪ 'new_colchicine'+str(i))  
        print(str(i)+' '+str(smile))  
except:  
    print("Error when creating PDB for "+str(smile)+' '+str(i))
```

Correctly moved...

0 COC1=C2C3=CC=C(NC)C(=O)C=C3[C@H1](CCC2=CC(OC)=C1OC)NCCONC

Correctly moved...

1 COC1=C2C3=CC=C(NC)C(=O)C=C3[C@H1](CCC2=CC(OC)=C1OC)NCCCCC

Correctly moved...

2 COC1=C2C3=CC=C(NC)C(=O)C=C3[C@H1](CCC2=CC(OC)=C1OC)NCCCCC

Correctly moved...

3 COC1=C2C3=CC=C(NC)C(=O)C=C3[C@H1](CCC2=CC(OC)=C1OC)N4C=C(N=N4)CNCC

Correctly moved...

4 O=CC1=CN=NN1[C@H1]2CCC3=CC(OC)=C(OC)C(OC)=C3C4=CC=C(C(=O)C=C42)NCC  
Correctly moved...

5 OC1=CC=C(C=C1)CN[C@H1]2CCC3=C(C(OC)=C(OC)C(OC)=C3)C4=CC=C(SC)C(=O)C=C24  
Correctly moved...

6 OC1=CC=C(C=C1)CN[C@H1]2CCC3=CC(OC)=C(OC)C(OC)=C3C4=CC=C(C(C=C42)=O)SCC  
Correctly moved...

7 O=CC1=C2[C@H1](CCC3=CC(OC)=C(OC)C(=C3C2=CC=C(SC)C1=O)OCC4=CC=CC=C4)ONC  
Correctly moved...

8 C1=2[C@H1](CCC3=CC(OC)=C(OC)C(OC)=C3C1=CC=C(SC)C(=O)C=2)NC(C)CC=CSC  
Correctly moved...

9 C1N(C(=S)N[C@@H1]2C3=CC(C(NC)=CC=C3C4=C(OC)C(OC)=C(OC)C=C4CC2)=O)C=C1  
Correctly moved...

10 C1=2[C@H1](CCC3=CC(OC)=C(OC)C(OC)=C3C1=CC=C(C(C=2)=O)SCNC(C)=O)C  
Correctly moved...

11 C[C@H1](CCC1=CC(OC)=C(OC)C(OC(OC)=O)=C1C2=CC=C(SC)C(=O)C=C2)NC  
Correctly moved...

12 COC1=C2C3=CC=C(NC)C(=O)C=C3[C@H1](CCC2=CC(OC)=C1OC)NCCC4=CC=CC=C4  
Correctly moved...

13 COC1=C2C3=CC=C(NC)C(=O)C=C3[C@H1](CCC2=CC(OC)=C1OC)NC/C=C/C4=CC=CC=C4  
Correctly moved...

14 CC(=O)N[C@H1]1CCC2=CC(OC)=C(OC)C(OC)=C2C=3C1=CC(=O)C(SC)=CC=3N  
Correctly moved...

15 C1=2C(=O)C(=C3C=C1C4=C(CC[C@@H1]3NC(C)=O)C=C(OC)C(OC)=C4OC(OC)=O)C=2  
Correctly moved...

16 CC(=O)OC1=CC=C2C3=C(C(OC)=C(C=C3CC[C@@H1](C2=CC1=O)OC(=O)C)OC)NC(=O)C  
Correctly moved...

17 CC(=O)OC1=CC=C2C3=C(C(OC)=C(C=C3CC[C@@H1](C2=CC1=O)OC(=O)C)OC)NC(=O)COC  
Correctly moved...

18 CC(=O)OC1=CC=C2C3=C(C(OC)=C(C=C3CC[C@@H1](C2=CC1=O)OC(=O)C)OC)OC  
Correctly moved...

19 CC(C)C(OC1=CC=C2C3=C(CC[C@@H1](C2=CC1=O)NC(C)=O)C=C(OC)C(OC)=C3OC)(O)C  
Correctly moved...

20 CC(=O)N[C@@H1]1C2=CC(C(SC)=CC=C2C3=C(OC)C(=C(OC)C=C3CC1)OC(=O)C4=CC=CC=C4)=O  
Correctly moved...

21 O=C(OC)OC1=CC=C2C3=C(C(OC)=C(C=C3CC[C@@H1](C2=CC1=O)NC(=O)C)OC)OC(=O)C  
Correctly moved...

22 O=C(C)N[C@H1]1CCC2=CC(=C(OC)C(=C2C=3C1=CC(C(SC)=CC=3)=O)OC(=O)CC)COC  
Correctly moved...

23 CC(=O)OCC1=CN(N=N1)[C@H1]2CCC3=CC(OC)=C(OC)C(OC)=C3C=4C2=CC(=O)C(NC)=CC=4C  
Correctly moved...

24 CC(=O)OCC1=CN(N=N1)[C@H1]2CCC3=CC(OC)=C(OC)C(=C3C=4C2=CC(C(NC)=CC=4)=O)OC  
Correctly moved...

25 CC(=O)N[C@@H1]1C2=CC(C(NC)=CC=C2C3=C(OC)C(OC)=C(OC)C=C3C1)=O  
Correctly moved...

26 CC(=O)N[C@H1]C1=C2C(C(NC)=CC=C1C3=C(OC)C(OC)=C(OC)C=C3CC2)=O  
Correctly moved...

27 COC1=C2C3=CC=C(NC)C(=O)C=C3[C@H1](NCCC)CCC2=CC(=C1OC)NC  
Correctly moved...

28 COC1=C2C3=CC=C(NC)C(=O)C=C3[C@H1](CCC2=CC(OC)=C1OC)NN=NC=C  
 Correctly moved...

29 COC1=C2C3=CC=C(NC)C(=O)C=C3[C@@H1](NCCC)CCC2=CC(=C1OC)OSC  
 Correctly moved...

30 COC1=C2C3=CC=C(NC)C(=O)C=C3[C@H1](CCC2=CC(=C1OC)OC)NCCCS  
 Correctly moved...

31 COC1=C(OC)C(OC)=CC=2CC[C@H1](NC(=N)N)C3=CC(=O)C(=CC=C3C1=2)CNC  
 Correctly moved...

32 CNC(NCCCC)=S[C@@H1]C1=CC(=O)C(NC)=CC=C1C2=C(C=C(OC)C(=C2OC)OC)CCF  
 Correctly moved...

33 CN(C(=S)N[C@@H1]1C2=CC(=O)C(NC)=CC=C2C3=C(C=C(OC)C(OC)=C3OC)CC1C)C#N  
 Correctly moved...

34 CNC(C(C)C)N[C@@H1]1C=2C(C3=C(C=C(OC)C(OC)=C3OC)CC1)=CC=C(C(=O)C=2)NC  
 Correctly moved...

35 COC1=C(OC)C(OC)=CC=2CC[C@@H1](C3=CC(=O)C(NC)=CC=C3C=21)N4C=C(N=N4)CON  
 Correctly moved...

36 COC1=C(OC)C(OC)=CC=2CC[C@@H1](C3=CC(=O)C(NC)=CC=C3C=21)NCCC4CCCCC4  
 Correctly moved...

37 CC(C)(C)COC1=CC=C2C3=C(OC)C(OC)=C(OC)C=C3CC[C@@H1](C2=CC1=O)SC=O  
 Correctly moved...

38 C1=2[C@H1]CCC3=CC(OC)=C(OC)C(OC(CC)=O)=C3C1=CC=C(C(C=2)=O)SCNC(=O)CSC  
 Correctly moved...

39 OC(CCC(C)C)OCC1=CN(N=N1)[C@H1]2CCC3=CC(OC)=C(OC)C(OC)=C3C4=CC=C(NC)C(=O)C=C24  
 Correctly moved...

40  
OC1=C(C=CC=C1)C=2N=NN(C=2)[C@H1]3CCC4=CC(OC)=C(OC)C(OC)=C4C5=CC=C(NC)C(=O)C=C35  
 Correctly moved...

41 NC1=CN(N=N1)[C@H1]2CCC3=C(C(OC)=C(OC)C(OC)=C3)C4=CC=C(NC)C(C=C24)=O  
 Correctly moved...

42 O=C(OC)CN(CCO)N[C@H1]1CCC2=CC(OC)=C(OC)C(OC)=C2C3=CC=C(NC)C(=O)C=C13  
 Correctly moved...

43 O=C(C1=C(C(OC)=O)N(N=N1)[C@@H1]C2=C3C(C(NC)=CC=C2C4=C(C(OC)=C(OC)C=C4CC3)OC)=O)O  
 Correctly moved...

44 C1=2[C@H1](CCC3=CC(OC)=C(OC)C(OC)=C3C1=CC=C(C(=O)C=2)NCO)C(C(OC)=O)NC(=O)CNC  
 Correctly moved...

45 C=12N(N=NC=1C(OCC3=CC=C(C=C3)F)=O)C(OC)=C(OC)C(OC)=CC4=CC=C(C(=O)C=C24)NC  
 Correctly moved...

46 C=1N(N=NC=1C(=O)OCC2=CC=C(C=C2)F)CC(OC)=C(OC)C(OC)=CC3=CC=C(NC)C(=O)C=C3  
 Correctly moved...

47  
O=CC1=C(C(OC)=O)N(N=N1)[C@@H1]C2=C3C(C(NC)=CC=C2C4=C(C(OC)=C(OC)C=C4CC3)OC)=O  
 Correctly moved...

48 O=C(C(C1)C1)NC(=O)N[C@H1]1CCC2=C(C(OC)=C(OC)C(OC)=C2)C3=CC=C(NC)C(=O)C=C13  
 Correctly moved...

49  
O=C(C(C1)C1)NCC1=CN(N=N1)[C@H1]2CCC3=CC(OC)=C(OC)C(OC)=C3C4=CC=C(C(=O)C=C42)NCCO  
 Correctly moved...



50 O=C(C(C1)C1)NC(=O)N[C@H1]1CCC2=C(C(OC)=C(OC)C(OC)=C2)C3=CC=C(C(C=C31)=O)NCC(=O)OC  
Correctly moved...

51 O=C(O)C=C(C(OC)=O)N=NN[C@H1]1CCC2=CC(OC)=C(OC)C(OC)=C2C3=CC=C(NC)C(=O)C=C13  
Correctly moved...

52  
O=C(O)C1=C(C(OC)=O)N=NN1[C@H1]2CCC3=CC(OC)=C(OC)C(OC)=C3C4=CC=C(NC)C(=O)C=C24  
Correctly moved...

53 O=C(OC)C1=CN(N=N1)[C@H1]2CCC3=CC(OC)=C(OC)C(=C3C4=CC=C(NC)C(C=C42)=O)OCC  
Correctly moved...

54 O=C(O)C1=CN(N=N1)[C@H1]2CCC3=C(C(OC)=C(OC)C(OC)=C3)C4=CC=C(C(=O)C=C42)NCC  
Correctly moved...

55 O=C(O)C1=C(C(OC)=O)N=NN1[C@H1]CCC2=CC(OC)=C(OC)C(OC)=C2C3=CC=C(C(C=C3)=O)NC  
Correctly moved...

56 CCCCCCCCCCCCCC(OC1=CN(N=N1)[C@H1]C2CC3=CC(OC)=C(OC)C(OC)=C3C4=CC=C(C(=O)C=C24)NC)=O  
Correctly moved...

57  
OC(=O)C1=C(C(OC)=O)N(N=N1)[C@H1]C2CC3=CC(OC)=C(OC)C(OC)=C3C4=CC=C(NC)C(=O)C=C42  
Correctly moved...

58 C1=C(OC)C=C(OC)C=C1CC[C@H1](C=CC(C(OC(C2=CC=CC=C2)=O)=CC=CC)=O)C  
Correctly moved...

59 N(C)C(=O)NCCC(OC1=CN(N=N1)[C@H1]CCC2=CC(OC)=C(OC)C(OC)=C2C3=CC=C(C(=O)C=C3)N)  
C=O  
Correctly moved...

60  
OC(=O)C=C(C(OC)=O)N(NCCC)N[C@H1]1CCC2=CC(OC)=C(OC)C(OC)=C2C3=CC=C(NC)C(=O)C=C31  
Correctly moved...

61 C[C@H1](NCC)CC1=CC(C(NC)=CC=C1C2=C(C=C(OC)C(OC)=C2OCC3=CC=CC=C3)OSCC)=O  
Something went wrong while creating PDB file...

62 C=1C(C)(C)OC(=O)/N=C(/N[C@H1]2CCC3=C(C(OC)=C(OC)C(OC)=C3)C4=CC=C(NC)C(=O)C=C24)N=1  
Correctly moved...

63 N1=NN1[C@@H1]2C3=CC(C(NC)=CC=C3C4=C(C(OC)=C(OC)C=C4CC2)OC)=O  
Correctly moved...

64  
O=CC=CC=CC(NCC1=CN(N=N1)[C@H1]2CCC3=CC(OC)=C(OC)C(OC)=C3C4=CC=C(C(C=C24)=O)NC)=O  
Correctly moved...

65 CN(N([C@@H1]1C2=CC(=O)C(NC)=CC=C2C3=CC(=C(OC)C=C3CC1)OC)O)CNC(=S)CCCC  
Correctly moved...

66 CC(C)C(=O)OCC1=CN(N=N1)[C@H1]2CCC3=CC(OC)=C(OC)C(OC)=C3C4=CC=C(NC)C(=O)C=C24  
Correctly moved...

67 N(C(C1=CC=NC=C1)=O)[C@@H1]2C=3C(C4=C(C(OC)=C(OC)C=C4CC2)OC)=CC=C(SC)C(=O)C=3  
Correctly moved...

68 N1(CCCC1)CN[C@H1]2CCC3=C(C(OC)=C(OC)C(OC)=C3)C4=CC=C(SC)C(=O)C=C24  
Correctly moved...

69 N1(CCCC1)C(=O)OC2=C(OC)C(OC3)=CC=C2C4=CC=C(SC)C(C=C4[C@@H1](NC(=O)C)CC3)=O  
Correctly moved...

70 CNC=1C(=O)C=C2[C@H1](CCC3=CC(OC)=C(OC)C(OC)=C3C2=CC=1)NC4(C(=O)O)C=CN=N4  
 Correctly moved...

71 CC(C)(C)OC(=O)NCCC(NCC=1N=NN(C=1)[C@H1]C2CC3=CC(OC)=C(OC)C(OC)=C3C4=CC=C(C(=O)C=C24)N)C=O  
 Something went wrong while creating PDB file...

72 C1C(C)(C)OC/N=C(/N[C@H1]2CCC3=CC(OC)=C(OC)C(=C3C4=CC=C(NC)C(C=C42)=O)OC)N=N1  
 Correctly moved...

73 CC(C)(C)OCNCCC(=O)NCC1=CN(N=N1)[C@H1]2CCC3=CC(OC)=C(OC)C(OC)=C3C4=CC=C(C(C=C24)=O)NC=O  
 Something went wrong while creating PDB file...

74 C1C(C)(C)OC/N=C(/N[C@H1]2CCC3=CC(OC)=C(OC)C(=C3C4=CC=C(NC)C(C=C42)=O)OC)N1C  
 Correctly moved...

75 CC(C)(C)OC(=O)NCCC(OC=1N=NN(C=1)[C@H1]C2CC3=CC(OC)=C(OC)C(OC)=C3C4=CC=C(C(=O)C=C24)NC)=O  
 Correctly moved...

76 CC(C)(C)OC(=O)NCCC(NCC=1N=NN(C=1)[C@H1]2CCC3=CC(OC)=C(OC)C(OC)=C3C4=CC=C(C(C=C24)=O)N)C=O  
 Correctly moved...

77  
CNCCC1=CC=C(C=C1)NC(=O)N[C@H1]2CCC3=CC(OC)=C(OC)C(OC)=C3C4=CC=C(C(C=C24)=O)NC=O  
 Correctly moved...

78 CNCC(C1=CC=C(C=C1)NC(=O)N[C@@H1]2C3=CC(C(NC)=CC=C3C4=C(C(OC)=C(OC)C=C4CC2)OC)=O)OC  
 Correctly moved...

79 O=C(OC)OCC1=CN(N=N1)[C@H1]2CCC3=CC(OC)=C(OC)C(OC)=C3C4=CC=C(NC)C(=O)C=C24  
 Correctly moved...

80 O=C(C(C)C)NC(=S)N[C@@H1]1C=2C(C3=C(C(OC)=C(OC)C=C3CC1)OC)=CC=C(NC)C(=O)C=2  
 Correctly moved...

81 O=C(OC)OCC=1N=NN(C=1)[C@H1]2CCC3=CC(OC)=C(OC)C(OC)=C3C4=CC=C(NC)C(=O)C=C24  
 Correctly moved...

82 O=C(OC)CN(CCO)C(=S)N[C@H1]1CCC2=CC(OC)=C(OC)C(OC)=C2C3=CC=C(NC)C(=O)C=C13  
 Correctly moved...

83 CC(C)CNCC1=CN(N=N1)[C@H1]2CCC3=CC(OC)=C(OC)C(OC)=C3C4=CC=C(C(C=C24)=O)NC=O  
 Correctly moved...

84 CC(C)CNCC1=CN(N=N1)[C@H1]2CCC3=CC(OC)=C(OC)C(OC)=C3C4=CC=C(NC)C(=O)C=C24  
 Correctly moved...

85 COCNCC1=CN(N=N1)[C@H1]2CCC3=CC(OC)=C(OC)C(OC)=C3C4=CC=C(C(C=C42)=O)NC=O  
 Correctly moved...

86  
N(C(C)C)C(NCC1=CN(N=N1)[C@H1]2CCC3=CC(OC)=C(OC)C(OC)=C3C4=CC=C(NC)C(=O)C=C24)=O  
 Correctly moved...

87 N(C)C1=CC=C2C3=C(OC)C(OC)=C(OC)C=C3CC[C@@H1](C2=CC1=O)NC(C(=O)O)CCON=CCF  
 Correctly moved...

88  
N(C(C(C)C)=O)C1=CN(N=N1)[C@H1]2CCC3=C(C(OC)=C(OC)C(OC)=C3)C4=CC=C(NC)C(=O)C=C24  
 Correctly moved...

89 N(CCCCCC=O)CC1=CN(N=N1)[C@H1]2CCC3=CC(OC)=C(OC)C(OC)=C3C4=CC=C(NC)C(=O)C=C24  
 Correctly moved...

90 C1=C(C=CC(C1)=C1)COC(=O)CN[C@@H1]2C=3C(C4=C(C(OC)=C(OC)C=C4CC2)OC)=CC=C(SC)C(=O)C=3

Correctly moved...

91 N(C)C1=CC=C2C3=C(OC)C(OC)=C(OC)C=C3CC[C@@H1](C2=CC1=O)NC(C(=O)O)CCONC(=O)C=C

Correctly moved...

92 N(C)C1=CC=C2C3=C(OC)C(OC)=C(OC)C=C3CC[C@@H1](C2=CC1=O)NC(C(=O)O)CCONC(=O)CNC

Correctly moved...

93

N(C(C)C)CC(=O)OCC1=C2N(N=N1)[C@H1]CCC3=CC(OC)=C(OC)C(OC)=C3C4=CC=C(NC)C(C=C24)=O

Correctly moved...

94 CC(CC)N[C@@H1]1C2=CC(C(SC)=CC=C2C3=C(OC)C(OC)=C(C=C3CC1)OC)=O

Correctly moved...

95 CC(CC)N[C@@H1]C1=C2C(C(NC)=CC=C1C3=C(OC)C(OC)=C(OC)C=C3CC2)=O

Correctly moved...

96 COC1=C2C3=CC=C(NC)C(=O)C=C3[C@H1](CCC2=CC(OC)=C1OC)NCC4=CC=NS4C

[13:01:05] UFFTYPER: Unrecognized atom type: S\_5+4 (31)

Correctly moved...

97 N(C)C=1C(=O)C=C2[C@H1](CCC3=CC(OC)=C(OC)C(OC)=C3C2=CC=1N)C(C)CCSC

Correctly moved...

98 CNC=1C(C=C2[C@H1](CCC3=C(C(OC)=C(OC)C(OC)=C3)C2=CC=1)NC(C)C)=O

Correctly moved...

99 NN([C@H1]1CCC2=CC(OC)=C(OC)C(OC)=C2C3=CC=C(NC)C(=O)C=C13)C=O

Correctly moved...

100 OCCN(CC=C)C(=O)N[C@@H1]1C2=CC(C(NC)=CC=C2C3=C(OC)C(OC)=C(OC)C=C3CC1)=O

Correctly moved...

101 OCCN(CC=C)C(=S)N[C@H1]1CCC2=CC(OC)=C(OC)C(OC)=C2C3=CC=C(NC)C(=O)C=C13

Correctly moved...

102 CNC(N(C)C)CN[C@H1]1CCC2=CC(OC)=C(C(OC)=C2C=3C1=CC(=O)C(=CC=3)NC)OC

Correctly moved...

103 NC(N(CC)OC)N[C@H1]1CCC2=CC(OC)=C(OC)C(OC)=C2C=3C1=CC(=O)C(=CC=3)NC

Correctly moved...

104 C1[C@H1](C2=CC(C(SC)=CC=C2C3=C(OC)C(=C(OC)C=C3C1)OC)=O)NCC

Correctly moved...

105 C1=2[C@H1](CCC3=CC(OC)=C(OC)C(OC)=C3C1=CC=C(SC)C(=O)C=2NC)C

Correctly moved...

106 C1=2[C@H1](CCC3=CC(OC)=C(OC)C(OC)=C3C1=CC=C(C(C=2)=O)SCN)C(=O)C

Correctly moved...

107 NC(=O)N[C@@H1]C1=C2C(C(NC)=CC=C1C3=C(OC)C(OC)=C(OC)C=C3CC2)=O

Correctly moved...

108 CC(C)NC(=O)N1[C@@H1]C2=CC(C(NC)=CC=C2C3=C(OC)C(OC)=C(OC)C=C3CC1)=O

Correctly moved...

109 CC(N)(CCO)[C@H1]1CCC2=CC(OC)=C(OC)C(OC)=C2C3=CC=C(SC)C(=O)C=C13

Correctly moved...

110 CC(N)(CCO)[C@H1]1CCC2=CC(OC)=C(OC)C(OC)=C2C3=CC=C(C(C=C31)=O)NCC

Correctly moved...

111 C1[C@H1](NC(C)=O)C2=CC(C(NC)=CC=C2C3=C(OC)C(OC)=C(C=C3C1)OCNC)=O

Correctly moved...

112 C1[C@H1](NC(C)=O)C2=CC(C(SC)=CC=C2C3=C(OC)C(OC)=C(C=C3C1)OCNC)=O  
Correctly moved...

113 C=C(N[C@H1]1CCC2=C(C(OC)=C(OC)C(OC)=C2)C3=CC=C(SC)C(C=C31)=O)C  
Correctly moved...

114 CC(C)N(C(C)C)C(=O)N[C@@H1]C1=CC(C(NC)=CC=C1C2=C(OC)C(OC)=C(OC)C=C2CC)=O  
Correctly moved...

115 C1C(C)NC1N[C@H1]2CCC3=CC(OC)=C(OC)C(OC)=C3C4=CC=C(C(=O)C=C42)NC=O  
Correctly moved...

116 O=C(N[C@H1]1CCC2=CC(OC)=C(OC)C(OC)=C2C3=CC=C(NC)C(=O)C=C31)N(S)CC  
Correctly moved...

117 O=C(N[C@H1]1CCC2=CC(OC)=C(OC)C(OC)=C2C3=CC=C(NC)C(=O)C=C13)CCOCC  
Correctly moved...

118 COC1=C2C3=CC=C(NC)C(=O)C=C3[C@H1](CCC2=CC(OC)=C1OC)NC(=O)N(CCCCC1)O  
Correctly moved...

119 COC=CC1=CC=C(NC)C(=O)C=C1[C@@H1](NC(=S)NC2=CC=CC=C2)C1  
Correctly moved...

120 N=1C(=CN(N=1)[C@H1]2CCC3=CC(OC)=C(OC)C(OC)=C3C4=CC=C(NC)C(=O)C=C42)C=O  
Correctly moved...

121 C1=2[C@H1]CCC3=CC(OC)=C(OC)C(OC)=C3C1=CC=C(C(C=2)=O)SCNC(C)=O  
Correctly moved...

122 N1([C@H1]2CCC3=C(C(OC)=C(OC)C(OC)=C3)C4=CC=C(NC)C(C=C24)=O)C=C1I  
Correctly moved...

123 N1([C@H1]2CCC3=C(C(OC)=C(OC)C(OC)=C3)C4=CC=C(NC)C(C=C24)=O)C=C1OCC  
Correctly moved...

124 N1C(OC)=C(C=C1)N[C@H1]2CCC3=C(C(OC)=C(OC)C(OC)=C3)C4=CC=C(SC)C(C=C42)=O  
Correctly moved...

125 N(C(C)C)(C(C)C)C(=O)N1[C@H1]CCC2=C(C(OC)=C(OC)C(OC)=C2)C3=CC=C(NC)C(C=C31)=O  
Correctly moved...

126 N(CCCC)CC1=CN(N=N1)[C@H1]2CCC3=CC(OC)=C(OC)C(OC)=C3C4=CC=C(NC)C(=O)C=C24  
Correctly moved...

127 NC(=S)N1[C@@H1]C2=CC(C(NC)=CC=C2C3=C(OC)C(OC)=C(OC)C=C3CC1)=O  
Correctly moved...

128 C=C(CN[C@H1]1CCC2=CC(OC)=C(OC)C(OC)=C2C3=CC=C(NC)C(C=C13)=O)C=O  
Correctly moved...

129 C1=C(N=NN1[C@H1]2CCC3=CC(OC)=C(OC)C(OC)=C3C4=CC=C(NC)C(=O)C=C24)C  
Correctly moved...

130 C=CC=C(NC(=O)N[C@H1]1CCC2=CC(OC)=C(OC)C(OC)=C2C3=CC=C(NC)C(=O)C=C13)C  
Correctly moved...

131 C[C@H1](CCC1=CC(OC)=C(OC)C(OC(OCC)=O)=C1C2=CC=C(SC)C(=O)C=C2)NCC  
Correctly moved...

132 COCC(CN[C@@H1]1C=2C(C3=C(C(OC)=C(OC)C=C3CC1)OC)=CC=C(NC)C(C=2)=O)F  
Correctly moved...

133 NC1=NN=NN1[C@@H1]2C=3C(C4=C(C(OC)=C(OC)C=C4CC2)OC)=CC=C(NC)C(C=3)=O  
Correctly moved...

134 OCCN(CCO)C(=S)N1[C@@H1]C2=CC(C(NC)=CC=C2C3=C(OC)C(OC)=C(OC)C=C3CC1)=O  
Correctly moved...

135 NC(C(OCC)=C)N[C@H1]1CCC2=CC(OC)=C(OC)C(OC)=C2C3=CC=C(NC)C(=O)C=C31  
Correctly moved...

136 N([C@H]1CCCC2=CC(OC)=C(OC)C(OC)=C2C3=CC=C(NC)C(C=C13)=O)=N  
Correctly moved...

137 NC(CCC)N[C@H]1C2=CC(C(NC)=CC=C2C3=C(OC)C(OC)=C(OC)C=C3CC1)=O  
Correctly moved...

138 N([C@H]1CCCC2=CC(OC)=C(OC)C(OC)=C2C3=CC=C(NC)C(C=C31)=O)=C  
Correctly moved...

139 N([C@H]1CCCC2=CC(OC)=C(OC)C(OC)=C2C3=CC=C(NC)C(C=C13)=O)=CC  
Correctly moved...

140 C1=2[C@H]1(CCC3=C(C(OC)=C(OC)C(OC)=C3)C1=CC=C(C(C=2)=O)NCNCC(C)C)ONC  
Correctly moved...

141 N(C)C=1C(=O)C=C2[C@H]1(CCC3=C(C(OC)=C(OC)C(OC)=C3)C2=CC=1)N4C(C(=O)O)=C(N=N4)C(=O)N  
Correctly moved...

142 N(CCCC)CNCC1=CN(N=N1)[C@H]12CCC3=CC(OC)=C(OC)C(OC)=C3C4=CC=C(NC)C(=O)C=C24  
Correctly moved...

143  
N(C)C=1C(=O)C=C2[C@H]1(CCC3=C(C(OC)=C(OC)C(OC)=C3)C2=CC=1)NC(C(=O)O)=C(COCC)C=O  
Something went wrong while creating PDB file...

144 OC(\N[C@H]1CCCC2=CC(OC)=C(OC)C(OC)=C2C3=CC=C(C(C=C31)=O)NCNC(C)C)=O  
Correctly moved...

145 N1=CC=C(C=C1)C(NCC=2N=NN(C=2)[C@H]13CCC4=CC(OC)=C(OC)C(OC)=C4C5=CC=C(C(C=C53)=O)N)C=O  
Correctly moved...

146 OCC(C)=C1C([C@H]1(CCC2=CC(OC)=C(OC)C(OC)=C12)NC(NC3=CC=C(C=C3)F)=O)PNC=O  
Correctly moved...

147 N1=CC=C(C=C1)C(NCC=2N=NN(C=2)[C@H]13C4=CCC(NC)=CC=C4C5=C(OC)C(OC)=C(OC)C=C5CC3)=O  
Something went wrong while creating PDB file...

148  
CC(C)(C)OC(=O)/N=C(/N[C@H]1CCCC2=C(C(OC)=C(OC)C(OC)=C2)C3=CC=C(NC)C(C=C13)=O)N=N  
Correctly moved...

149 CC(C)(C)OC(=O)NCCCNCC1=CN(N=N1)[C@H]12CCC3=CC(OC)=C(OC)C(OC)=C3C4=CC=C(NC)C(=O)C=C42  
Correctly moved...

150 COC1=C2C3=CC=C(SC)C(=O)C=C3[C@H]1(CCC2=CC(OC)=C1OC)NCCC  
Correctly moved...

151 COC1=C2C3=CC=C(NC)C(=O)C=C3[C@H]1(CCC2=CC(OC)=C1OC)NCCCCCSC  
Correctly moved...

152 C=C(CO)CN[C@H]1CCCC2=CC(OC)=C(OC)C(OC)=C2C3=CC=C(SC)C(=O)C=C31  
Correctly moved...

153 CC(C)CN[C@H]1CCCC2=CC(OC)=C(OC)C(OC)=C2C3=CC=C(C(C=C31)=O)SCC  
Correctly moved...

154 CC(C)CCN[C@H]1CCCC2=CC(OC)=C(OC)C(OC)=C2C3=CC=C(C(C=C13)=O)SCC  
Correctly moved...

155 CC(C)CCN[C@H]1C1CC2=CC(OC)=C(OC)C(OC)=C2C3=CC=C(SC)C(C=C31)=O  
Correctly moved...

156 N=1NC=1[C@H]12C3=CC(C(NC)=CC=C3C4=C(C=C(OC)C(=C4OC)OC)CC2)=O  
Correctly moved...

157 C0C1=C2C3=CC=C(NC)C(=O)C=C3[C@H1](CCC2=CC(OC)=C1OC)NCC(C)C  
Correctly moved...

158 C0C1=C(OC)C(OC)=CC=2CC[C@@H1](C3=CC(C(=CC=C3C1=2)SC)=O)NCCC(C)CC  
Correctly moved...

159 C12=CC(C(NC)=CC=C1C3=C(C=C(OC)C(OC)=C3OC)CC[C@@H1]2NCC=4SC=CC=4OC)=O  
Correctly moved...

160 O=CC1=CN=NN1[C@H1]2CCC3=CC(OC)=C(OC)C(OC)=C3C4=CC=C(C(C=C24)=O)NCCC  
Correctly moved...

161 C1=CN=CC=C1CN[C@H1]2CCC3=CC(OC)=C(OC)C(OC)=C3C4=CC=C(C(C=C42)=O)SCC(=O)C  
Correctly moved...

162 C1=CN=CC=C1CN[C@H1]2CCC3=CC(OC)=C(OC)C(OC)=C3C4=CC=C(C(C=C42)=O)SCC  
Correctly moved...

163 C=C1N=CC(C)N1CN[C@H1]2CCC3=C(C(OC)=C(OC)C(OC)=C3)C4=CC=C(C(C=C24)=O)NC  
Correctly moved...

164 CNCC(C)OC(=O)N[C@H1]1CCC2=C(C(OC)=C(OC)C(OC)=C2)C3=CC=C(C(=O)C=C31)NCF  
Correctly moved...

165 C=CC=C(CCN[C@H1]1CCC2=CC(OC)=C(OC)C(OC)=C2C3=CC=C(SC)C(C=C31)=O)OC  
Correctly moved...

166 C1C0C1(OC2=CC=C3C4=C(OC)C(OC)=C(OC)C=C4CC[C@@H1](C3=CC2=O)SC(C)=O)SC  
Correctly moved...

167 O=C(OC1=C2C(CC[C@H1](NC(=O)C)C3=CC(C(SC)=CC=C32)=O)=CC(OC)=C1OC)SCC  
Correctly moved...

168 O=C1C=CC=C2C([C@H1](CCC3=CC(OC)=C(OC)C(OC)=C32)NC(C)=O)=C1SC  
Correctly moved...

169 C1=CC=C(C=C1)CN[C@H1]2CCC3=CC(OC)=C(OC)C(OC)=C3C4=CC=C(C(C=C42)=O)SCC  
Correctly moved...

170 CC=CCCN[C@H1]1CCC2=CC(OC)=C(OC)C(OC)=C2C3=CC=C(SC)C(C=C13)=O  
Correctly moved...

171 OC1=C(C=CC=C1)CN2[C@H1]CCC3=CC(OC)=C(OC)C(OC)=C3C4=CC=C(SC)C(C=C24)=O  
Correctly moved...

172 C0C1=C2C3=CC=C(NC)C(=O)C=C3[C@H1](CCC2=CC(OC)=C1OC)NCCCCCCCCSC  
Correctly moved...

173 C0C1=CC=2CC[C@@H1](C=3C(C=2C(=C1OC)OC)=CC=C(NC)C(=O)C=3)NC(=O)CNC  
Correctly moved...

174 CSC1=CC=C2C(=CC1=O)[C@H1](CCC3=CC(OC)=C(OC)C(=C23)O)CNC(=O)C  
Correctly moved...

175 C1=C2[C@H1](CCC3=C(C(OC)=C(C(=C3)OC)OC)C2=CC=C(C1=O)NC)NC  
Correctly moved...

176 CC(=O)OC1=CC=C2C3=C(C(OC)=C(C=C3CC[C@@H1](C2=CC1=O)NC(=O)CO)CO)C  
Correctly moved...

177 CC(=O)OC=1C(=O)C=C2C(=CC=1)C3=C(OC)C(OC)=C(C=C3CC[C@@H1]2NC(C)=O)C(=O)C  
Correctly moved...

178 CC(=O)OC1=CC=C2C3=C(C(OC)=C(C=C3CC[C@@H1](C2=CC1=O)NC(=O)C)OC)OC(=O)C  
Correctly moved...

179 CCC(=O)OC1=CC=C2C3=C(C(OC)=C(C=C3CC[C@@H1](C2=CC1=O)OC(=O)C)OC)OC  
Correctly moved...

180 CCC(=O)N[C@H1]1CCC2=CC(=C(OC)C(OC)=C2C=3C1=CC(=O)C(=CC=3)OC(OC)=O)OC  
Correctly moved...

181 CC(C)C(OC1=CC=C2C3=C(CC[C@@H1](C2=CC1=O)NC(C)=O)C=C(OC)C(OC)=C3OC)(O)C=O  
Correctly moved...

182 CC(C)C(OC1=CC=C2C3=C(CC[C@@H1](C2=CC1=O)NC(C)=O)C=C(OC)C(OC)=C3OC=O)C  
Correctly moved...

183 CC(C)C(=O)OC1=CC=C2C3=C(C(OC)=C(C=C3CC[C@@H1](C2=CC1=O)NC(C)=O)OC)OC(=O)C  
Correctly moved...

184 CC(C)C(OC1=CC=C2C3=C(C=C(OC)C(OC)=C3OC)CC[C@@H1](C2=CC1=O)NC(=O)CC)(O)C  
Correctly moved...

185 CC(=O)OCC1=CN(N=N1)[C@H1]2CCC3=CC(OC)=C(OC)C(OC)=C3C=4C2=CC(=O)C(=CC=4)NCC  
Correctly moved...

186 C1=C(C2=C(OC)C(OC)=C1OC(=O)CCC)C[C@@H1](C3=CC(=O)C(SC)=CC=C32)NC(C)=O  
Correctly moved...

187 CC(=O)N[C@H1]1CCC2=CC(OC)=C(OC)C(=C2C3=CC=C(C(C=C31)=O)OCC4=CC=CC=C4)OOC  
Correctly moved...

188 O=C(C)N[C@H1]1CCC2=CC(=C(OC)C(=C2C=3C1=CC(C(=CC=3)OC(=O)OC)=O)CN)C(=O)COCC  
Correctly moved...

189 C=12C(=O)C(=CC=C3C=1[C@H1](CCC4=CC(OC)=C(OC)C(OC)=C34)NC(C)=O)C2  
Correctly moved...

190 CCC(=O)N[C@H1]1CCC2=C(C(OC)=C(C(OC)=C2)OC)C=3C1=CC(C(SC)=CC=3)=O  
Correctly moved...

191 CCC(=O)N[C@H1]1CCC2=CC(OC)=C(C(OC)=C2C=3C1=CC(=O)C(=CC=3)SC)OC(=O)OCC  
Correctly moved...

192 CC=1C(=CC(C(=CC=1)SC)=O)[C@H1](CCC2=CC(OC)=C(OC)C(=C2)OC)NC(=O)C  
Correctly moved...

193 CC(C)COCCN[C@H1]1CCC2=CC(OC)=C(C(=C2C=3C1=CC(C(=CC=3)SC)=O)OC)OC(=O)C  
Correctly moved...

194 CC(C)CCN[C@H1]1CCC2=C(C3=CC=C(SC)C(C=C31)=O)C(=C(C(OC)=C2)OC)OCCC  
Correctly moved...

195 CC(C)CCN[C@H1]1CCC2=C(C3=CC=C(SC)C(C=C31)=O)C(=C(C(OC)=C2)OC)OC(=O)C  
Correctly moved...

196 C1=C(OC)C(=C(OC)C2=C1CC[C@H1](NC(=O)C)C=3C2=CC=C(OC(=O)OC)C(C=3)=O)C  
Correctly moved...

197 O=C(C)N[C@H1]1CCC2=CC(OC)=C(C(OC)=C2C3=CC=C(C(=O)C=C13)OCCC)OOC  
Correctly moved...

198 O=C(N(C)C)NC1=CC=C2C3=C(OC)C(=C(OC)C=C3CC[C@@H1](C2=CC1=O)NCC)OOC  
Correctly moved...

199 O=C(N)N[C@H1]1CCC2=CC(OC)=C(C(OC)=C2C=3C1=CC(C(OC(=O)C)=CC=3)=O)OC  
Correctly moved...

200 O=C(C)N[C@H1]1CCC2=CC(OC)=C(C(OC)=C2C3=CC=C(C(=O)C=C31)OC(=O)O)CCOC  
Correctly moved...

201 CC(=O)N1[C@H1]CCC2=CC(OC)=C(OC)C(OC)=C2C3=CC=C(NC)C(C=C31)=O  
Correctly moved...

202 COC1=C2C3=CC=C(NC)C(=O)C=C3[C@H1](CCC2=CC(OC)=C1OC)NO  
Correctly moved...

203 C1[C@@H1](C2=CC(=O)C(NC)=CC=C2C3=C(C=C(OC)C(=C3OC)OC)C1)NCCSC  
Correctly moved...

204 CNC(C(C)O)N([C@H1]1CCC2=CC(=C(OC)C(OC)=C2C=3C1=CC(=O)C(=CC=3)NC)OCC)C  
Correctly moved...

205 CNC(C(C)O)N[C@@H1]1C=2C(C3=C(C=C(OC)C(OC)=C3OC)CC1)=CC=C(C(=O)C=2)NC  
 Correctly moved...

206 CNC(=S)N[C@@H1]1C2=CC(=O)C(NC)=CC=C2C3=C(OC)C(=C(C=C3CC1)OC)OC0  
 Correctly moved...

207 N([C@H1]1CCC2=C(C3=CC=C(C(C=C13)=O)NC)C(OC)=C(OC)C(OC)=C2)N=N  
 Correctly moved...

208 C12=CC(C(NC)=CC=C1C3=C(C=C(C(OC)=C3OC)OC)CC[C@@H1]2NCCCCCCCCCF)=O  
 Correctly moved...

209 COC1=C(OC)C(OC)=CC=2CC[C@@H1](C3=CC(=O)C(NC)=CC=C3C=21)NCCC4=CC=CC=C4NC  
 Correctly moved...

210 COC1=C(OC)C(OC)=CC=2CC[C@@H1](C3=CC(=O)C(NC)=CC=C3C=21)N4C=C(N=N4)CCONC  
 Correctly moved...

211 CN(C(=S)N[C@@H1]1C2=CC(=O)C(NC)=CC=C2C3=C(C(=C(OC)C=C3CC1)OC)OC)CC#N  
 Correctly moved...

212 CC(C)(C)OC1=CN(N=N1)[C@H1]C2CC3=CC(OC)=C(OC)C(OC)=C3C4=CC=C(NC)C(=O)C=C42  
 Correctly moved...

213 CC(C)CCCCCN[C@@H1]1C2=CC(C(SC)=CC=C2C3=C(C(OC)=C(OC)C=C3CC1)OC)=O  
 Correctly moved...

214 CC(C)(C)C(=O)N[C@@H1]1C=2C(C3=C(C(OC)=C(OC)C=C3CC1)OC)=CC=C(NC)C(=O)C=2  
 Correctly moved...

215 OC(CCC(C)C)OCC1=CN(N=N1)[C@H1]CCC2=CC(OC)=C(OC)C(OC)=C2C3=CC=C(C(=O)C=C3)NC  
 Correctly moved...

216 O=C(NCC1=CC=CC=C1C1)N[C@H1]2CCC3=C(C(OC)=C(OC)C(OC)=C3)C4=CC=C(NC)C(=O)C=C24  
 Correctly moved...

217 N([C@H1]1CCC2=C(C(OC)=C(OC)C(OC)=C2)C3=CC=C(NC)C(C=C13)=O)C(O)=O  
 Correctly moved...

218 O=CC=CCC=CN(C)[C@H1]1CCC2=CC(OC)=C(OC)C(OC)=C2C3=CC=C(NC)C(=O)C=C13)=O  
 Correctly moved...

219  
OC1=C(C=CC=C1)C=2N=NN(C=2)[C@H1]C3CC4=CC(OC)=C(OC)C(OC)=C4C5=CC=C(NC)C(=O)C=C53  
 Correctly moved...

220  
OC1=C(C=CC=C1)C=2N=NN(C=2)[C@H1]CCC3=CC(OC)=C(OC)C(OC)=C3C4=CC=C(NC)C(=O)C=C4  
 Correctly moved...

221 C1[C@@H1](C2=CC(=O)C(NC)=CC=C2C3=C(C(=C(OC)C=C3C1)OC)OC)N4C=C(N=N4)COC  
 Correctly moved...

222 O=C(OC(C)(C)C)N[C@H1]1CCC2=C(C(OC)=C(OC)C(OC)=C2)C3=CC=C(NC)C(=O)C=C13  
 Correctly moved...

223 O=C(OCC)CN(OCC)C[C@@H1]1C2=CC(C(NC)=CC=C2C3=C(C(OC)=C(OC)C=C3CC1)OC)=O  
 Correctly moved...

224 O=C(C)OC1=CN(N=N1)[C@H1]2CCC3=CC(OC)=C(OC)C(OC)=C3C4=CC=C(NC)C(=O)C=C24  
 Correctly moved...

225 O=C(OCC)CN(CCC)C[C@H1]C1CC2=CC(OC)=C(OC)C(OC)=C2C3=CC=C(SC)C(=O)C=C31  
 Correctly moved...

226 O=C(C(C1)C1)NC(=O)N[C@H1]1CCC2=C(C(OC)=C(OC)C(OC)=C2)C3=CC=C(C(C=C31)=O)NCN(O)CCC=O  
 Correctly moved...

227 O=C(C(C1)C1)NC(=O)N[C@H1]1CCC2=C(C(OC)=C(OC)C(OC)=C2)C3=CC=C(C(C=C31)=O)NCC4



=CC=CC=C4  
 Correctly moved...  
 228  
O=C(OCCC)OCC1=CN(N=N1)[C@H1]2CCC3=CC(OC)=C(OC)C(OC)=C3C4=CC=C(C(=O)C=C24)NCCO  
 Correctly moved...  
 229 O=C(OCCC)OCC1=CN(N=N1)[C@H1]2CCC3=CC(OC)=C(OC)C(OC)=C3C4=CC=C(C(=O)C=C42)NCC(=O)C  
 Correctly moved...  
 230 O=C(OCC=C)NCC1=CN(N=N1)[C@H1]2CCC3=CC(OC)=C(OC)C(OC)=C3C4=CC=C(C(=O)C=C24)NC(=O)C  
 Correctly moved...  
 231 O=C(C(C1)C1)NCC1=CN(N=N1)[C@H1]2CCC3=CC(OC)=C(OC)C(OC)=C3C4=CC=C(C(=O)C=C24)NCC(=O)C  
 Correctly moved...  
 232 O=C(C(C1)C1)NCC1=CN(N=N1)[C@H1]2CCC3=CC(OC)=C(OC)C(=C3C=4C2=CC(C(NC)=CC=4)=O)OCCC1  
 Correctly moved...  
 233 O=C(C)N[C@@H1]1CC(C2=C(C(OC)=C(OC)C=C2CC1)OCC3=CC=CC=C3)=O  
 Correctly moved...  
 234  
O=C(C(C1)C1)NC(=O)N[C@H1]1CCC2=CC(OC)=C(OC)C(OC)=C2C3=CC=C(C(C=C31)=O)NCC(=O)O  
 Correctly moved...  
 235  
O=C(OCC)C1=CN(N=N1)[C@H1]2CCC3=CC(OC)=C(OC)C(OC)=C3C4=CC=C(C(C=C24)=O)NCC(=O)C  
 Correctly moved...  
 236 O=C(O)CN(CCO)C(=O)N[C@H1]1CCC2=CC(OC)=C(OC)C(OC)=C2C3=CC=C(C(C=C13)=O)NCC  
 Correctly moved...  
 237 CC(C)OC(NCC1=CN(N=N1)[C@H1]2CCC3=CC(OC)=C(OC)C(OC)=C3C4=CC=CC(C=C24)=O)NC=O  
 Correctly moved...  
 238  
COC(NCCCOCC1=CN(N=N1)[C@H1]2CCC3=CC(OC)=C(OC)C(=C3C4=CC=C(NC)C(C=C24)=O)OC=O)=O  
 Something went wrong while creating PDB file...  
 239  
C=1C(C)OC(=O)/N=C(/N[C@H1]2CCC3=C(C(OC)=C(OC)C(OC)=C3)C4=CC=C(NC)C(=O)C=C42)N=1  
 Correctly moved...  
 240  
C1=CN=CC=C1C2=CN(N=N2)[C@H1]3CCC4=C(C(OC)=C(OC)C(OC)=C4)C5=CC=C(C(=O)C=C35)NCO  
 Correctly moved...  
 241  
COC=C(OC)C(OC)=CCCC[C@H1](N1C=C(N=N1)COC(=O)C2=CC=NC=C2)C3=CC(=O)C(=CC=C3CNCN)C  
 Correctly moved...  
 242  
COC1=C(OC)C=CC=2CC[C@@H1](C3=CC(=O)C(NC)=CC=C3C1=2)N4C=C(N=N4)COC5=CC=CC=C5OC  
 Correctly moved...  
 243 CC(C)(O)C=CN([C@H1]1CCC2=CC(OC)=C(OC)C(OC)=C2C3=CC=C(C(C=C13)=O)NC)O  
 Correctly moved...  
 244 C=12C(=CC(C(NC)=CC=1)=O)[C@H1](CCC3=CC(OC)=C(OC)C(=C32)OC)C(C)C=O  
 Correctly moved...

245 NC(=O)NCC1=CN(N=N1) [C@H1] 2CCC3=CC(OC)=C(OC)C(OC)=C3C4=CC=C(NC)C(=O)C=C24  
Correctly moved...

246 C1=CC(OC)=CC=C1CN [C@H1] 2CCC3=C(C(OC)=C(OC)C(OC)=C3)C=4C2=CC(C(=CC=4)NC)=O  
Correctly moved...

247 N(C(C1=CC=CC=C1)=O)CCN [C@H1] 2CCC3=CC(OC)=C(OC)C(OC)=C3C4=CC=C(C(C=C24)=O)SC  
Correctly moved...

248 N=NC(=C(C(OC)=O)N [C@H1] 1CCC2=CC(OC)=C(OC)C(OC)=C2C3=CC=C(C(C=C13)=O)N)C  
Correctly moved...

249 CNC=1C(=O)C=C2 [C@H1] (CCC3=C(C(OC)=C(OC)C(OC)=C3)C2=CC=1)NC(C(=O)O)=CN=CNC  
Correctly moved...

250  
NN(C=C(CNC(CCCCC1)=O)N=N) [C@H1] 1CCC2=CC(OC)=C(OC)C(OC)=C2C3=CC=C(NC)C(=O)C=C31  
Correctly moved...

251 N=NC1=CN(N=N1) [C@H1] 2CCC3=CC(OC)=C(OC)C(=C3C4=CC=C(NC)C(C=C42)=O)OC  
Correctly moved...

252 CC(C)(C)OC(=O)NCCC(NCC=1N=NN(C=1) [C@H1] CCC2=CC(OC)=C(OC)C=C2C3=CC=C(NC)C(C=C3)=O)OC=O  
Correctly moved...

253 CC(C)(C)OCNCCC(=O)NCC1=CN(N=N1) [C@H1] C2CC3=CC(OC)=C(OC)C(OC)=C3C4=CC=C(C(=O)C=C24)NC=O  
Correctly moved...

254  
C1(=CN(C(=O)OCC)N [C@H1] 2C=3C(C4=C(OC)C(OC)=C(OC)C=C4CC2)=CC=C(C(=O)C=3)NC)N=C1  
Correctly moved...

255 CC(C)(C)OCNCCC(=O)NCC1=CN(N=N1) [C@H1] 2C3=CC(C(NC)=CC=C3C4=C(CC2)C=C(OC)C(=C4OC)NC)=O  
Correctly moved...

256 CC(C)(C)OC(=O)NCCC(OCC=1N=NN(C=1) [C@H1] CCC2=CC(OC)=C(OC)C(=C2C3=CC=C(NC)C(=O)C=C3)O)C=O  
Something went wrong while creating PDB file...

257  
CC(C)OC(=O)/N=C(/N [C@H1] 1CCC2=C(C(OC)=C(OC)C(OC)=C2)C3=CC=C(NC)C(=O)C=C13)N=N  
Correctly moved...

258  
C=1N(N=NC=1C(OCC)=O) [C@H1] 2CCC3=C(C(OC)=C(OC)C(OC)=C3)C4=CC=C(C(=O)C=C42)NCOCC  
Correctly moved...

259 O=CC=CN=NN [C@H1] 1CCC2=C(C(OC)=C(OC)C(=C2)OC)C3=CC=C(NC)C(=O)C=C13  
Correctly moved...

260 C1=CN=CC=C1C(NCC2=CN(N=N2) [C@H1] 3CCC4=CC(OC)=C(OC)C(=C4C5=CC=C(C(C=C53)=O)OC)OO)C  
Correctly moved...

261 N=NN([C@H1] 1CCC2=C(C(OC)=C(OC)C(OC)=C2)C3=CC=C(C(=O)C=C13)NC)C(=O)OCC  
Correctly moved...

262 CN(N([C@H1] 1C2=CC(=O)C(NC)=CC=C2C3=CC(=C(OC)C=C3CC1)OC)O)CNC(=S)NCCCCC  
Correctly moved...

263 CN(N([C@H1] 1C2=CC(=O)C(NC)=CC=C2C3=CC(=C(OC)C=C3CC1)OC)O)CNC(=S)CCCCC  
Correctly moved...

264 O=C(CC)OCC1=CN(N=N1) [C@H1] 2CCC3=CC(OC)=C(OC)C(OC)=C3C4=CC=C(NC)C(=O)C=C24

Correctly moved...

265 O=C(OC(C)(C)C)NCC=1N=NN(C=1)[C@H1]C2CC3=CC(OC)=C(OC)C(OC)=C3C4=CC=C(NC)C(=O)C=C42

Correctly moved...

266 O=C(C(C)C)NCN[C@H1]1CCC2=CC(OC)=C(OC)C(OC)=C2C3=CC=C(NC)C(=O)C=C13

Correctly moved...

267 O=C(OC)C=1N(N=NC=1C(=O)O2)[C@H1]2NC(=S)N[C@H1]3CCC4=CC(OC)=C(OC)C(OC)=C4C=5C3=CC(C(=CC=5)NC)=O

Correctly moved...

268 CC(O)(C)CC(=O)OCC1=CN(N=N1)[C@H1]2CCC3=CC(OC)=C(OC)C(OC)=C3C=4C2=CC(C(=CC=4)NC)=O

Correctly moved...

269

CC(C)COC(NCC1=CN(N=N1)[C@H1]C2CC3=CC(OC)=C(OC)C(OC)=C3C4=CC=C(C(=O)C=C24)NC)=O

Correctly moved...

270 COCNCC1=CN(N=N1)[C@H1]2CCC3=CC(OC)=C(OC)C(OC)=C3C4=CC=C(NC)C(=O)C=C24

Correctly moved...

271 CC(C)(C)OC(NCC=1N=NN(C=1)[C@H1]2CCC3=CC(OC)=C(OC)C(OC)=C3C4=CC=C(C(C=C24)=O)N)C=O

Correctly moved...

272 N(C)C1=CC=C2C3=C(OC)C(OC)=C(OC)C=C3CC[C@@H1](C2=CC1=O)NC(C(=O)O)CCONCOCNCOC

Correctly moved...

273

O=C(OC)C1=C(C(OC)=O)N=NN1[C@H1]CCC2=CC(OC)=C(OC)C(OC)=C2C3=CC=C(NC)C(C=C3)=O

Correctly moved...

274 N([C@H1]1CCC2=CC(OC)=C(OC)C(OC)=C2C3=CC=C(NC)C(C=C13)=O)C=CCOC(=O)CCCC=O

Correctly moved...

275 CC(CC)N[C@H1]C1CC2=CC(OC)=C(OC)C(OC)=C2C3=CC=C(C(C=C31)=O)NCC

Correctly moved...

276 CC(CC)N[C@H1]C1CC2=CC(OC)=C(OC)C(OC)=C2C3=CC=C(NC)C(=O)C=C31

Correctly moved...

277 COC1=C2C3=CC=C(NC)C(=O)C=C3[C@@H1](NCC(CCC)C)CCC2=CC(OC)=C1OC

Correctly moved...

278 COC1=C2C3=CC=C(NC)C(=O)C=C3[C@H1](CCC2=CC(OC)=C1OC)NCC4=CC=NS4

Correctly moved...

279 COC1=C2C3=CC=C(SC)C(=O)C=C3[C@H1](CCC2=CC(OC)=C1OC)NCCCC1

Correctly moved...

280 O(C1=C(OC)C=C2C3=CC=C(SC)C(C=C3[C@H1](CCC=2C=C1OC)NC(C)CC=C)=O)C

Correctly moved...

281 C1=CN=CC=C1CN[C@H1]2CCC3=CC(OC)=C(OC)C(OC)=C3C4=CC=C(C(C=C24)=O)NCC

Correctly moved...

282 O=CC1=CN=NN1[C@H1]2CCC3=CC(OC)=C(OC)C(OC)=C3C4=CC=C(C(C=C42)=O)NC

Correctly moved...

283 NC(CCN[C@H1]1CCC2=CC(OC)=C(OC)C(OC)=C2C=3C1=CC(=O)C=CC=3)NCF

Correctly moved...

284 NC(N=C1C=CC2)=CC=C1C3=C(OC)C(OC)=C(OC)C=C3CC[C@@H1]2NC(N)=O

Correctly moved...

285 C=CC1=C(NC)C(OC)=C(OC)C=C1CC[C@H1](NC(C)=O)C2=CC(C(=CC=C2)NC)=O

Correctly moved...

286 CC(N)(CCO)[C@H]1CCC2=CC(OC)=C(OC)C(OC)=C2C3=CC=C(NC)C(=O)C=C31  
Correctly moved...

287 N(NCCCC1)[C@H]1CCC2=CC(OC)=C(OC)C(OC)=C2C3=CC=C(NC)C(=O)C=C31  
Correctly moved...

288 N(C1=CC=C(C=C1)C)CN[C@H]1CCCC3=CC(OC)=C(OC)C(OC)=C3C=4C2=CC(C(NC)=CC=4)=O  
Correctly moved...

289 N(C1=CC=C(C=C1)C)CN[C@H]1CCCC3=CC(OC)=C(OC)C(OC)=C3C=4C2=CC(C(=CC=4)SC)=O  
Correctly moved...

290 CCN(CC)C(=O)N[C@H]1C1CC2=CC(OC)=C(OC)C(OC)=C2C3=CC=C(C(C=C31)=O)NC  
Correctly moved...

291 CCN(CC)C(=O)N1[C@H]1CCC2=CC(OC)=C(OC)C(OC)=C2C3=CC=C(NC)C(C=C31)=O  
Correctly moved...

292 CCN(CC)C(=O)N[C@H]1CCC2=CC(OC)=C(OC)C(OC)=C2C3=CC=C(C(C=C31)=O)NCC  
Correctly moved...

293 CC(C)COC1=C(OC)C(OC)=CC=2CC[C@H]1(NC(=O)C)C3=CC(C(SC)=CC=C3C1=2)=O  
Correctly moved...

294 C=C(C)CN(CCO)C(=S)N[C@H]1CCC2=C(C(OC)=C(OC)C(OC)=C2)C3=CC=C(NC)C(C=C31)=O  
Correctly moved...

295 CC(C)C(OC=C(C(OC)=CCCC[C@H]1(NC(=O)C)C1=CC(C(SC)=CC=C1C)=O)C)=O  
Correctly moved...

296 N([C@H]1)CCC2=CC(OC)=C(OC)C(OC)=C2C3=CC=C(NC)C(=O)C=C31=C(C1)C=C  
Correctly moved...

297 O=C(N[C@H]1)CCC2=CC(OC)=C(OC)C(OC)=C2C3=CC=C(C(C=C31)=O)NCN)C4=CC=CC=C4  
Correctly moved...

298 O=C(N[C@@H]1)C2=CC(C(NC)=CC=C2C3=C(CC1)C=C(OC)C(OC)=C3OC)=O)N=N  
Correctly moved...

299 N([C@H]1)CCC2=CC(OC)=C(OC)C(OC)=C2C3=CC=C(NC)C(C=C13)=O)CNC(=O)OCCONC  
Correctly moved...

300 O=C(N[C@H]1)CCC2=CC(OC)=C(OC)C(OC)=C2C3=CC=C(NC)C(=O)C=C31)CCOC(=O)O  
Correctly moved...

301 C1=CCC[C@H]1(NC(=S)NC2=CC=C(C=C2)C(F)(F)F)CC(C1)=CC=C(NC)C(=O)COCOC  
Correctly moved...

302 CNCC(O)(C)C1=CN(N=N1)[C@H]1CCCC3=CC(OC)=C(OC)C(OC)=C3C4=CC=C(C(=O)C=C24)NC  
Correctly moved...

303 N1([C@H]1)CCCC3=C(C(OC)=C(OC)C(OC)=C3)C4=CC=C(NC)C(C=C24)=O)C(O)=C1C  
Correctly moved...

304 N([C@H]1)CCC2=C(C(OC)=C(OC)C(OC)=C2)C3=CC=C(NC)C(C=C13)=O)NC=CC=CC1  
Correctly moved...

305  
C1=C(O)C(OC)=CC(CN[C@H]1)CCCC3=C(C(OC)=C(OC)C(OC)=C3)C4=CC=C(SC)C(=O)C=C42)=C1C  
Correctly moved...

306 COCC(C)=C(C(OC)=CCCC[C@H]1(NCC)C1=CC(C(SC)=CC=C1)=O)OC  
Correctly moved...

307 C[C@H]1(CCC1=CC(OC)=C(OC)C(OC)=C1C2=CC=C(C(=O)C=C2)NCN)CCO  
Correctly moved...

308 NC(=O)N1[C@@H]1C2=CC(C(NC)=CC=C2C3=C(OC)C(OC)=C(OC)C=C3CC1)=O  
Correctly moved...

309 NN(CCO) [C@@H1] 1C2=CC(C(NC)=CC=C2C3=C(OC)C(OC)=C(C=C3CC1)OC)=O  
Correctly moved...

310 C1=2[C@H1] (CCC3=CC(OC)=C(OC)C(OC)=C3C1=CC=C(NC)C(=O)C=2NC)CO  
Correctly moved...

311 NC(N=NCOC)C[C@H1] 1C2=CC(C(NC)=CC=C2C3=C(CC1)C=C(OC)C(OC)=C3OC)=O  
Correctly moved...

312 C1=2C(C3=C(OC)C(OC)=C(OC)C=C3CC[C@H1] 1NC(C)CC)=CC=C(NC)C(=O)C=2NC  
Correctly moved...

313 C1=C(CN[C@H1] 2CCC3=CC(OC)=C(OC)C(OC)=C3C4=CC=C(NC)C(=O)C=C42)C=NC=C1  
Correctly moved...

314 C1[C@H1] (NC(NC2=CC=C(C=C2)F)=O)C3=CC(C(NC)=CC=C3C4=C(OC)C(OC)=CC=C4OC1)=O  
Correctly moved...

315 C1=CC(=CC=N1)CCN[C@H1] 2C3=CC(C(SC)=CC=C3C4=C(CC2)C=C(OC)C(OC)=C4OC)=O  
Correctly moved...

316 C1=2[C@H1] CCC3=CC(OC)=C(OC)C(OC)=C3C1=CC=C(C(=O)C=2)NCNC(C)=O  
Correctly moved...

317 CC=CC1=C(C=C(OC)C(OC)=C1OC(OCC)=O)CC[C@H1] (NC(C)=O)C2=CC(C(SC)=CC=C2)=O  
Correctly moved...

318 O=C1C=C2[C@H1] (CCC3=C(C(OC)=C(OC)C(OC)=C3)C2=CC=C1SC)NC(N(C(C)C)C(C1)=O)NC  
Correctly moved...

319 O=C1C=C2[C@H1] (CCC3=C(C(OC)=C(OC)C(OC)=C3)C2=CC=C1SC)NC(C(=O)OCC)=CNC  
Correctly moved...

320 O=C1C=C2[C@H1] (CCC3=C(C(OC)=C(OC)C(OC)=C3)C2=CC=C1SC)NC(C(C)C)=O  
Correctly moved...

321 N1C=NN=NN1[C@H1] 2CCC3=C(C(OC)=C(OC)C(OC)=C3)C4=CC=C(C(C=C42)=O)NCCC  
Correctly moved...

322 CNC=1C(=O)C=C2[C@H1] (CCC3=CC(OC)=C(OC)C(OC)=C3C2=CC=1N)C(C(C)C)=O  
Correctly moved...

323 N([C@H1] 1CCC2=CC(OC)=C(OC)C(OC)=C2C3=CC=C(NC)C(C=C31)=O)CCCCF  
Correctly moved...

324 C[C@H1] (CCC1=CC(OC)=C(OC)C(OC)=C1C2=CC=C(C(C=C2)=O)SC)NC/C=C/C3=CC=CC=C3  
Correctly moved...

325 N([C@H1] 1CCC2=C(C(OC)=C(OC)C(OC)=C2)C3=CC=C(SC)C(C=C31)=O)CCCC  
Correctly moved...

326 C=CC1=C(C(=O)OC=CC=C2C3=C(OC)C(OC)=C(OC)C=C3CC[C@H1] (NC(C)=O)C2=C1SC)C  
Correctly moved...

327 C=C1C2=C(C=C(OC)C(OC)=C2OC(OCC)=O)CC[C@H1] (NC(C)=O)C3=CC(C(NC)=CC=C13)=O  
Correctly moved...

328 CC=CC(N[C@H1] 1CCC2=C(C(OC)=C(OC)C(OC)=C2)C3=CC=C(SC)C(C=C13)=O)CCOC  
Correctly moved...

329 OC(=O)NCC1=CN(N=N1) [C@@H1] 2C=3C(C4=C(C(OC)=C(OC)C=C4CC2)OC)=CC=C(NC)C(C=3)=O  
Correctly moved...

330 N(C)C=1C(=O)C=C2[C@H1] (CCC3=C(C(OC)=C(OC)C(OC)=C3)C2=CC=1)N4C(C(=O)O)=C(N=N4)C(=O)NNC  
Correctly moved...

331 O=C(C=C(C(01)CCCCC1)CN=N)N[C@H1] 2CCC3=CC(OC)=C(OC)C(OC)=C3C=4C2=CC(C(NC)=CC=4)=O  
Correctly moved...

332

N([C@H]1CCCC2=C(C(OC)=C(OC)C(OC)=C2)C3=CC=C(NC)C(=O)C=C13)CNCC4=CC=C(C=C4)C=O

Correctly moved...

333 O=C(C=C(C1)C=CN([C@H]1CCCC2=C(C(OC)=C(OC)C(OC)=C2)C3=CC=C(NC)C(C=C13)=O)OC(=O)CC)NC(OC4=CC=CC=C4)=O

Something went wrong while creating PDB file...

334 CC(C)(C)OC(=O)/N=C(/N[C@H]1CCCC2=C(C(OC)=C(OC)C(OC)=C2)C3=CC=C(NC)C(C=C31)=O)NCOC(C)=O

Something went wrong while creating PDB file...

335 CC(C)(C)OC(=O)/N=C(/N[C@H]1CCCC2=C(C(OC)=C(OC)C(OC)=C2)C3=CC=C(NC)C(C=C13)=O)NCOC(C)(F)F

Correctly moved...

336 C12=C3C(C4=C(OC)C(OC)=C(OC)C=C4CC[C@H]13NC(=O)N)=CC=C1NC=C2

### 1.3 load all the ligands

```
[12]: files = glob.glob("*lig*")
      print(files)
```

```
['100_lig100_', '101_lig101_', '102_lig102_', '103_lig103_', '104_lig104_',
'105_lig105_', '106_lig106_', '107_lig107_', '108_lig108_', '109_lig109_',
'10_lig10_', '110_lig110_', '111_lig111_', '112_lig112_', '113_lig113_',
'114_lig114_', '115_lig115_', '116_lig116_', '117_lig117_', '118_lig118_',
'119_lig119_', '11_lig11_', '120_lig120_', '121_lig121_', '122_lig122_',
'123_lig123_', '124_lig124_', '125_lig125_', '126_lig126_', '127_lig127_',
'128_lig128_', '129_lig129_', '12_lig12_', '130_lig130_', '131_lig131_',
'132_lig132_', '133_lig133_', '134_lig134_', '135_lig135_', '136_lig136_',
'137_lig137_', '138_lig138_', '139_lig139_', '13_lig13_', '140_lig140_',
'141_lig141_', '142_lig142_', '143_lig143_', '144_lig144_', '145_lig145_',
'146_lig146_', '147_lig147_', '148_lig148_', '149_lig149_', '14_lig14_',
'150_lig150_', '151_lig151_', '152_lig152_', '153_lig153_', '154_lig154_',
'155_lig155_', '156_lig156_', '157_lig157_', '158_lig158_', '159_lig159_',
'15_lig15_', '160_lig160_', '161_lig161_', '162_lig162_', '163_lig163_',
'164_lig164_', '165_lig165_', '166_lig166_', '167_lig167_', '168_lig168_',
'169_lig169_', '16_lig16_', '170_lig170_', '171_lig171_', '172_lig172_',
'173_lig173_', '174_lig174_', '175_lig175_', '176_lig176_', '177_lig177_',
'178_lig178_', '179_lig179_', '17_lig17_', '180_lig180_', '181_lig181_',
'182_lig182_', '183_lig183_', '184_lig184_', '185_lig185_', '186_lig186_',
'187_lig187_', '188_lig188_', '189_lig189_', '18_lig18_', '190_lig190_',
'191_lig191_', '192_lig192_', '193_lig193_', '194_lig194_', '195_lig195_',
'196_lig196_', '197_lig197_', '198_lig198_', '199_lig199_', '19_lig19_',
'1_lig1_', '200_lig200_', '201_lig201_', '202_lig202_', '203_lig203_',
'204_lig204_', '205_lig205_', '206_lig206_', '207_lig207_', '208_lig208_',
'209_lig209_', '20_lig20_', '210_lig210_', '211_lig211_', '212_lig212_',
'213_lig213_', '214_lig214_', '215_lig215_', '216_lig216_', '217_lig217_',
'218_lig218_', '219_lig219_', '21_lig21_', '220_lig220_', '221_lig221_',
'222_lig222_', '223_lig223_', '224_lig224_', '225_lig225_', '226_lig226_',
'227_lig227_', '228_lig228_', '229_lig229_', '22_lig22_', '230_lig230_']
```

```
'231_lig231_', '232_lig232_', '233_lig233_', '234_lig234_', '235_lig235_',
'236_lig236_', '237_lig237_', '238_lig238_', '239_lig239_', '23_lig23_',
'240_lig240_', '241_lig241_', '242_lig242_', '243_lig243_', '244_lig244_',
'245_lig245_', '246_lig246_', '247_lig247_', '248_lig248_', '249_lig249_',
'24_lig24_', '250_lig250_', '251_lig251_', '252_lig252_', '253_lig253_',
'254_lig254_', '255_lig255_', '256_lig256_', '257_lig257_', '258_lig258_',
'259_lig259_', '25_lig25_', '260_lig260_', '261_lig261_', '262_lig262_',
'263_lig263_', '264_lig264_', '265_lig265_', '266_lig266_', '267_lig267_',
'268_lig268_', '269_lig269_', '26_lig26_', '270_lig270_', '271_lig271_',
'272_lig272_', '273_lig273_', '274_lig274_', '275_lig275_', '276_lig276_',
'277_lig277_', '278_lig278_', '279_lig279_', '27_lig27_', '280_lig280_',
'281_lig281_', '282_lig282_', '283_lig283_', '284_lig284_', '285_lig285_',
'286_lig286_', '287_lig287_', '288_lig288_', '289_lig289_', '28_lig28_',
'290_lig290_', '291_lig291_', '292_lig292_', '293_lig293_', '294_lig294_',
'295_lig295_', '296_lig296_', '297_lig297_', '298_lig298_', '299_lig299_',
'29_lig29_', '2_lig2_', '300_lig300_', '301_lig301_', '302_lig302_',
'303_lig303_', '304_lig304_', '305_lig305_', '306_lig306_', '307_lig307_',
'308_lig308_', '309_lig309_', '30_lig30_', '310_lig310_', '311_lig311_',
'312_lig312_', '313_lig313_', '314_lig314_', '315_lig315_', '316_lig316_',
'317_lig317_', '318_lig318_', '319_lig319_', '31_lig31_', '320_lig320_',
'321_lig321_', '322_lig322_', '323_lig323_', '324_lig324_', '325_lig325_',
'326_lig326_', '327_lig327_', '328_lig328_', '329_lig329_', '32_lig32_',
'330_lig330_', '331_lig331_', '332_lig332_', '333_lig333_', '334_lig334_',
'335_lig335_', '336_lig336_', '337_lig337_', '33_lig33_', '34_lig34_',
'35_lig35_', '36_lig36_', '37_lig37_', '38_lig38_', '39_lig39_', '3_lig3_',
'40_lig40_', '41_lig41_', '42_lig42_', '43_lig43_', '44_lig44_', '45_lig45_',
'46_lig46_', '47_lig47_', '48_lig48_', '49_lig49_', '4_lig4_', '50_lig50_',
'51_lig51_', '52_lig52_', '53_lig53_', '54_lig54_', '55_lig55_', '56_lig56_',
'57_lig57_', '58_lig58_', '59_lig59_', '5_lig5_', '60_lig60_', '61_lig61_',
'62_lig62_', '63_lig63_', '64_lig64_', '65_lig65_', '66_lig66_', '67_lig67_',
'68_lig68_', '69_lig69_', '6_lig6_', '70_lig70_', '71_lig71_', '72_lig72_',
'73_lig73_', '74_lig74_', '75_lig75_', '76_lig76_', '77_lig77_', '78_lig78_',
'79_lig79_', '7_lig7_', '80_lig80_', '81_lig81_', '82_lig82_', '83_lig83_',
'84_lig84_', '85_lig85_', '86_lig86_', '87_lig87_', '88_lig88_', '89_lig89_',
'8_lig8_', '90_lig90_', '91_lig91_', '92_lig92_', '93_lig93_', '94_lig94_',
'95_lig95_', '96_lig96_', '97_lig97_', '98_lig98_', '99_lig99_', '9_lig9_']
```

```
[17]: pdbs = []
      for pdb in files:
          pdb = glob.glob(pdb+str('\\3D*'))
          pdbs.append(pdb)
```

```
[18]: pdbs
```

```
[18]: [['100_lig100_\\3D_structure_new_colchicine99_NN([C@H1]1CCC2=CC(OC)=C(OC)C(O.pdb
'],
      ['101_lig101_\\3D_structure_new_colchicine100_OCCN(CC=C)C(=O)N[C@H1]1C2=CC(.pd
```

b'],  
 ['102\_lig102\_\\3D\_structure\_new\_colchicine101\_OCCN(CC=C)C(=S)N[C@H1]1CCC2=CC.pdb'],  
 ['103\_lig103\_\\3D\_structure\_new\_colchicine102\_CNC(N(C)C)CN[C@H1]1CCC2=CC(OC).pdb'],  
 ['104\_lig104\_\\3D\_structure\_new\_colchicine103\_NC(N(CC)OC)N[C@H1]1CCC2=CC(OC).pdb'],  
 ['105\_lig105\_\\3D\_structure\_new\_colchicine104\_C1[C@H1](C2=CC(C(SC)=CC=C2C3=C.pdb'],  
 ['106\_lig106\_\\3D\_structure\_new\_colchicine105\_C1=2[C@H1](CCC3=CC(OC)=C(OC)C(.pdb'],  
 ['107\_lig107\_\\3D\_structure\_new\_colchicine106\_C1=2[C@H1](CCC3=CC(OC)=C(OC)C(.pdb'],  
 ['108\_lig108\_\\3D\_structure\_new\_colchicine107\_NC(=O)N[C@@H1]C1=C2C(C(NC)=CC=.pdb'],  
 ['109\_lig109\_\\3D\_structure\_new\_colchicine108\_CC(C)NC(=O)N1[C@@H1]C2=CC(C(NC.pdb'],  
 ['110\_lig110\_\\3D\_structure\_new\_colchicine109\_CC(N)(CCO)[C@H1]1CCC2=CC(OC)=C.pdb'],  
 ['111\_lig111\_\\3D\_structure\_new\_colchicine110\_CC(N)(CCO)[C@H1]1CCC2=CC(OC)=C.pdb'],  
 ['112\_lig112\_\\3D\_structure\_new\_colchicine111\_C1[C@H1](NC(C)=O)C2=CC(C(NC)=C.pdb'],  
 ['113\_lig113\_\\3D\_structure\_new\_colchicine112\_C1[C@H1](NC(C)=O)C2=CC(C(SC)=C.pdb'],  
 ['114\_lig114\_\\3D\_structure\_new\_colchicine113\_C=C(N[C@H1]1CCC2=C(C(OC)=C(OC).pdb'],  
 ['115\_lig115\_\\3D\_structure\_new\_colchicine114\_CC(C)N(C(C)C)C(=O)N[C@@H1]C1=C.pdb'],  
 ['116\_lig116\_\\3D\_structure\_new\_colchicine115\_C1C(C)NC1N[C@H1]2CCC3=CC(OC)=C.pdb'],  
 ['117\_lig117\_\\3D\_structure\_new\_colchicine116\_O=C(N[C@H1]1CCC2=CC(OC)=C(OC)C.pdb'],  
 ['118\_lig118\_\\3D\_structure\_new\_colchicine117\_O=C(N[C@H1]1CCC2=CC(OC)=C(OC)C.pdb'],  
 ['119\_lig119\_\\3D\_structure\_new\_colchicine118\_COC1=C2C3=CC=C(NC)C(=O)C=C3[C@H1]1CCC2=CC(OC)=C(OC)C(OC).pdb'],  
 ['120\_lig120\_\\3D\_structure\_new\_colchicine119\_COC=CC1=CC=C(NC)C(=O)C=C1[C@@H1]1CCC2=CC(OC)=C(OC)C(OC).pdb'],  
 ['121\_lig121\_\\3D\_structure\_new\_colchicine120\_N=1C(=CN(N=1)[C@H1]2CCC3=CC(OC)=C(OC)C(OC).pdb'],  
 ['122\_lig122\_\\3D\_structure\_new\_colchicine121\_C1=2[C@H1]CCC3=CC(OC)=C(OC)C(OC).pdb'],  
 ['123\_lig123\_\\3D\_structure\_new\_colchicine122\_N1([C@H1]2CCC3=C(C(OC)=C(OC)C(OC).pdb'],



['124\_lig124\_\\3D\_structure\_new\_colchicine123\_N1([C@H1]2CCC3=C(C(OC)=C(OC)C(.pd  
 b'],  
 ['125\_lig125\_\\3D\_structure\_new\_colchicine124\_N1C(OC)=C(C=C1)N[C@H1]2CCC3=C(.pd  
 b'],  
 ['126\_lig126\_\\3D\_structure\_new\_colchicine125\_N(C(C)C)(C(C)C)C(=O)N1[C@H1]CC.pd  
 b'],  
 ['127\_lig127\_\\3D\_structure\_new\_colchicine126\_N(CCCC)CC1=CN(N=N1)[C@H1]2CCC3.pd  
 b'],  
 ['128\_lig128\_\\3D\_structure\_new\_colchicine127\_NC(=S)N1[C@@H1]C2=CC(C(NC)=CC=.pd  
 b'],  
 ['129\_lig129\_\\3D\_structure\_new\_colchicine128\_C=C(CN[C@H1]1CCC2=CC(OC)=C(OC).pd  
 b'],  
 ['12\_lig12\_\\3D\_structure\_new\_colchicine11\_C[C@H1](CCC1=CC(OC)=C(OC)C(OC(.pdb'],  
 ['130\_lig130\_\\3D\_structure\_new\_colchicine129\_C1=C(N=NN1[C@H1]2CCC3=CC(OC)=C.pd  
 b'],  
 ['131\_lig131\_\\3D\_structure\_new\_colchicine130\_C=CC=C(NC(=O)N[C@H1]1CCC2=CC(O.pd  
 b'],  
 ['132\_lig132\_\\3D\_structure\_new\_colchicine131\_C[C@H1](CCC1=CC(OC)=C(OC)C(OC(.pd  
 b'],  
 ['133\_lig133\_\\3D\_structure\_new\_colchicine132\_COCC(CN[C@@H1]1C=2C(C3=C(C(OC).pd  
 b'],  
 ['134\_lig134\_\\3D\_structure\_new\_colchicine133\_NC1=NN=NN1[C@@H1]2C=3C(C4=C(C(.pd  
 b'],  
 ['135\_lig135\_\\3D\_structure\_new\_colchicine134\_OCCN(CCO)C(=S)N1[C@@H1]C2=CC(C.pd  
 b'],  
 ['136\_lig136\_\\3D\_structure\_new\_colchicine135\_NC(C(OCC)=C)N[C@H1]1CCC2=CC(OC.pd  
 b'],  
 ['137\_lig137\_\\3D\_structure\_new\_colchicine136\_N([C@H1]1CCC2=CC(OC)=C(OC)C(OC.pd  
 b'],  
 ['138\_lig138\_\\3D\_structure\_new\_colchicine137\_NC(CCC)N[C@@H1]1C2=CC(C(NC)=CC.pd  
 b'],  
 ['139\_lig139\_\\3D\_structure\_new\_colchicine138\_N([C@H1]1CCC2=CC(OC)=C(OC)C(OC.pd  
 b'],  
 ['13\_lig13\_\\3D\_structure\_new\_colchicine12\_COC1=C2C3=CC=C(NC)C(=O)C=C3[C@.pdb'],  
 ['140\_lig140\_\\3D\_structure\_new\_colchicine139\_N([C@H1]1CCC2=CC(OC)=C(OC)C(OC.pd  
 b'],  
 ['141\_lig141\_\\3D\_structure\_new\_colchicine140\_C1=2[C@H1](CCC3=C(C(OC)=C(OC)C.pd  
 b'],  
 ['142\_lig142\_\\3D\_structure\_new\_colchicine141\_N(C)C=1C(=O)C=C2[C@H1](CCC3=C(.pd  
 b'],  
 ['143\_lig143\_\\3D\_structure\_new\_colchicine142\_N(CCCC)CNCC1=CN(N=N1)[C@H1]2CC.pd  
 b'],  
 ['144\_lig144\_\\3D\_structure\_new\_colchicine143\_N(C)C=1C(=O)C=C2[C@H1](CCC3=C(.pd  
 b'],  
 ['145\_lig145\_\\3D\_LtvuU3.pdb'],  
 ['146\_lig146\_\\3D\_structure\_new\_colchicine145\_N1=CC=C(C=C1)C(NCC=2N=NN(C=2)[.pd  
 b'],

['147\_lig147\_\\3D\_structure\_new\_colchicine146\_OCC(C)=C1C([C@H1](CCC2=CC(OC)=.pd  
 b'],  
 ['148\_lig148\_\\3D\_structure\_new\_colchicine147\_N1=CC=C(C=C1)C(NCC=2N=NN(C=2)[.pd  
 b'],  
 ['149\_lig149\_\\3D\_bJov87.pdb'],  
 ['14\_lig14\_\\3D\_structure\_new\_colchicine13\_COC1=C2C3=CC=C(NC)C(=O)C=C3[C@.pdb'],  
 ['150\_lig150\_\\3D\_structure\_new\_colchicine149\_CC(C)(C)OC(=O)NCCCNCC1=CN(N=N1.pd  
 b'],  
 ['151\_lig151\_\\3D\_structure\_new\_colchicine150\_COC1=C2C3=CC=C(SC)C(=O)C=C3[C@.pd  
 b'],  
 ['152\_lig152\_\\3D\_structure\_new\_colchicine151\_COC1=C2C3=CC=C(NC)C(=O)C=C3[C@.pd  
 b'],  
 ['153\_lig153\_\\3D\_structure\_new\_colchicine152\_C=C(CO)CN[C@H1]1CCC2=CC(OC)=C(.pd  
 b'],  
 ['154\_lig154\_\\3D\_structure\_new\_colchicine153\_CC(C)CN[C@H1]1CCC2=CC(OC)=C(OC.pd  
 b'],  
 ['155\_lig155\_\\3D\_structure\_new\_colchicine154\_CC(C)CCN[C@H1]1CCC2=CC(OC)=C(O.pd  
 b'],  
 ['156\_lig156\_\\3D\_structure\_new\_colchicine155\_CC(C)CCN[C@H1]C1CC2=CC(OC)=C(O.pd  
 b'],  
 ['157\_lig157\_\\3D\_structure\_new\_colchicine156\_N=1NC=1[C@@H1]2C3=CC(C(NC)=CC=.pd  
 b'],  
 ['158\_lig158\_\\3D\_structure\_new\_colchicine157\_COC1=C2C3=CC=C(NC)C(=O)C=C3[C@.pd  
 b'],  
 ['159\_lig159\_\\3D\_structure\_new\_colchicine158\_COC1=C(OC)C(OC)=CC=2CC[C@@H1](.pd  
 b'],  
 ['15\_lig15\_\\3D\_structure\_new\_colchicine14\_CC(=O)N[C@H1]1CCC2=CC(OC)=C(OC.pdb'],  
 ['160\_lig160\_\\3D\_structure\_new\_colchicine159\_C12=CC(C(NC)=CC=C1C3=C(C=C(OC).pd  
 b'],  
 ['161\_lig161\_\\3D\_structure\_new\_colchicine160\_O=CC1=CN=NN1[C@H1]2CCC3=CC(OC).pd  
 b'],  
 ['162\_lig162\_\\3D\_structure\_new\_colchicine161\_C1=CN=CC=C1CN[C@H1]2CCC3=CC(OC.pd  
 b'],  
 ['163\_lig163\_\\3D\_structure\_new\_colchicine162\_C1=CN=CC=C1CN[C@H1]2CCC3=CC(OC.pd  
 b'],  
 ['164\_lig164\_\\3D\_structure\_new\_colchicine163\_C=C1N=CC(C)N1CN[C@H1]2CCC3=C(C.pd  
 b'],  
 ['165\_lig165\_\\3D\_structure\_new\_colchicine164\_CNCC(C)OC(=O)N[C@H1]1CCC2=C(C(.pd  
 b'],  
 ['166\_lig166\_\\3D\_structure\_new\_colchicine165\_C=CC=C(CCN[C@H1]1CCC2=CC(OC)=C.pd  
 b'],  
 ['167\_lig167\_\\3D\_structure\_new\_colchicine166\_C1COC1(OC2=CC=C3C4=C(OC)C(OC)=.pd  
 b'],  
 ['168\_lig168\_\\3D\_structure\_new\_colchicine167\_O=C(OC1=C2C(CC[C@H1](NC(=O)C)C.pd  
 b'],  
 ['169\_lig169\_\\3D\_structure\_new\_colchicine168\_O=C1C=CC=C2C([C@H1](CCC3=CC(OC.pd  
 b'],

['16\_lig16\_\\3D\_structure\_new\_colchicine15\_C1=2C(=O)C(=C3C=C1C4=C(CC[C@H].pdb'],  
 ['170\_lig170\_\\3D\_structure\_new\_colchicine169\_C1=CC=C(C=C1)CN[C@H1]2CCC3=CC(.pd  
 b'],  
 ['171\_lig171\_\\3D\_structure\_new\_colchicine170\_CC=CCCCN[C@H1]1CCC2=CC(OC)=C(O.pd  
 b'],  
 ['172\_lig172\_\\3D\_structure\_new\_colchicine171\_OC1=C(C=CC=C1)CN2[C@H1]CCC3=CC.pd  
 b'],  
 ['173\_lig173\_\\3D\_structure\_new\_colchicine172\_COC1=C2C3=CC=C(NC)C(=O)C=C3[C@.pd  
 b'],  
 ['174\_lig174\_\\3D\_structure\_new\_colchicine173\_COC1=CC=2CC[C@@H1](C=3C(C=2C(=.pd  
 b'],  
 ['175\_lig175\_\\3D\_structure\_new\_colchicine174\_CSC1=CC=C2C(=CC1=O)[C@H1](CCC3.pd  
 b'],  
 ['176\_lig176\_\\3D\_structure\_new\_colchicine175\_C1=C2[C@H1](CCC3=C(C(OC)=C(C(=.pd  
 b'],  
 ['177\_lig177\_\\3D\_structure\_new\_colchicine176\_CC(=O)OC1=CC=C2C3=C(C(OC)=C(C=.pd  
 b'],  
 ['178\_lig178\_\\3D\_structure\_new\_colchicine177\_CC(=O)OC=1C(=O)C=C2C(=CC=1)C3=.pd  
 b'],  
 ['179\_lig179\_\\3D\_structure\_new\_colchicine178\_CC(=O)OC1=CC=C2C3=C(C(OC)=C(C=.pd  
 b'],  
 ['17\_lig17\_\\3D\_structure\_new\_colchicine16\_CC(=O)OC1=CC=C2C3=C(C(OC)=C(C=.pdb'],  
 ['180\_lig180\_\\3D\_structure\_new\_colchicine179\_CCC(=O)OC1=CC=C2C3=C(C(OC)=C(C.pd  
 b'],  
 ['181\_lig181\_\\3D\_structure\_new\_colchicine180\_CCC(=O)N[C@H1]1CCC2=CC(=C(OC)C.pd  
 b'],  
 ['182\_lig182\_\\3D\_structure\_new\_colchicine181\_CC(C)C(OC1=CC=C2C3=C(CC[C@@H1].pd  
 b'],  
 ['183\_lig183\_\\3D\_structure\_new\_colchicine182\_CC(C)C(OC1=CC=C2C3=C(CC[C@@H1].pd  
 b'],  
 ['184\_lig184\_\\3D\_structure\_new\_colchicine183\_CC(C)C(=O)OC1=CC=C2C3=C(C(OC)=.pd  
 b'],  
 ['185\_lig185\_\\3D\_structure\_new\_colchicine184\_CC(C)C(OC1=CC=C2C3=C(C=C(OC)C(.pd  
 b'],  
 ['186\_lig186\_\\3D\_structure\_new\_colchicine185\_CC(=O)OCC1=CN(N=N1)[C@H1]2CCC3.pd  
 b'],  
 ['187\_lig187\_\\3D\_structure\_new\_colchicine186\_C1=C(C2=C(OC)C(OC)=C1OC(=O)CCC.pd  
 b'],  
 ['188\_lig188\_\\3D\_structure\_new\_colchicine187\_CC(=O)N[C@H1]1CCC2=CC(OC)=C(OC.pd  
 b'],  
 ['189\_lig189\_\\3D\_structure\_new\_colchicine188\_O=C(C)N[C@H1]1CCC2=CC(=C(OC)C(.pd  
 b'],  
 ['18\_lig18\_\\3D\_structure\_new\_colchicine17\_CC(=O)OC1=CC=C2C3=C(C(OC)=C(C=.pdb'],  
 ['190\_lig190\_\\3D\_structure\_new\_colchicine189\_C=12C(=O)C(=CC=C3C=1[C@H1](CCC.pd  
 b'],  
 ['191\_lig191\_\\3D\_structure\_new\_colchicine190\_CCC(=O)N[C@H1]1CCC2=C(C(OC)=C(.pd  
 b'],

['192\_lig192\_\\3D\_structure\_new\_colchicine191\_CCC(=O)N[C@H1]1CCC2=CC(OC)=C(C.pdb'],  
 ['193\_lig193\_\\3D\_structure\_new\_colchicine192\_CC=1C(=CC(C(=CC=1)SC)=O)[C@H1].pdb'],  
 ['194\_lig194\_\\3D\_structure\_new\_colchicine193\_CC(C)COCN[C@H1]1CCC2=CC(OC)=C(C.pdb'],  
 ['195\_lig195\_\\3D\_structure\_new\_colchicine194\_CC(C)CCN[C@H1]1CCC2=C(C3=CC=C(.pdb'],  
 ['196\_lig196\_\\3D\_structure\_new\_colchicine195\_CC(C)CCN[C@H1]1CCC2=C(C3=CC=C(.pdb'],  
 ['197\_lig197\_\\3D\_structure\_new\_colchicine196\_C1=C(OC)C(=C(OC)C2=C1CC[C@H1](.pdb'],  
 ['198\_lig198\_\\3D\_structure\_new\_colchicine197\_O=C(C)N[C@H1]1CCC2=CC(OC)=C(C(.pdb'],  
 ['199\_lig199\_\\3D\_structure\_new\_colchicine198\_O=C(N(C)C)NC1=CC=C2C3=C(OC)C(=.pdb'],  
 ['19\_lig19\_\\3D\_structure\_new\_colchicine18\_CC(=O)OC1=CC=C2C3=C(C(OC)=C(C=.pdb'],  
 ['1\_lig1\_\\3D\_structure\_new\_colchicine0\_COC1=C2C3=CC=C(NC)C(=O)C=C3[C@.pdb'],  
 ['200\_lig200\_\\3D\_structure\_new\_colchicine199\_O=C(N)N[C@H1]1CCC2=CC(OC)=C(C(.pdb'],  
 ['201\_lig201\_\\3D\_structure\_new\_colchicine200\_O=C(C)N[C@H1]1CCC2=CC(OC)=C(C(.pdb'],  
 ['202\_lig202\_\\3D\_structure\_new\_colchicine201\_CC(=O)N1[C@H1]CCC2=CC(OC)=C(OC.pdb'],  
 ['203\_lig203\_\\3D\_structure\_new\_colchicine202\_COC1=C2C3=CC=C(NC)C(=O)C=C3[C@.pdb'],  
 ['204\_lig204\_\\3D\_structure\_new\_colchicine203\_C1[C@@H1](C2=CC(=O)C(NC)=CC=C2.pdb'],  
 ['205\_lig205\_\\3D\_structure\_new\_colchicine204\_CNC(C(C)O)N([C@H1]1CCC2=CC(=C(.pdb'],  
 ['206\_lig206\_\\3D\_structure\_new\_colchicine205\_CNC(C(C)O)N[C@@H1]1C=2C(C3=C(C.pdb'],  
 ['207\_lig207\_\\3D\_structure\_new\_colchicine206\_CNC(=S)N[C@@H1]1C2=CC(=O)C(NC).pdb'],  
 ['208\_lig208\_\\3D\_structure\_new\_colchicine207\_N([C@H1]1CCC2=C(C3=CC=C(C(C=C1.pdb'],  
 ['209\_lig209\_\\3D\_structure\_new\_colchicine208\_C12=CC(C(NC)=CC=C1C3=C(C=C(C(0.pdb'],  
 ['20\_lig20\_\\3D\_structure\_new\_colchicine19\_CC(C)C(OC1=CC=C2C3=C(CC[C@@H1].pdb'],  
 ['210\_lig210\_\\3D\_structure\_new\_colchicine209\_COC1=C(OC)C(OC)=CC=2CC[C@@H1](.pdb'],  
 ['211\_lig211\_\\3D\_structure\_new\_colchicine210\_COC1=C(OC)C(OC)=CC=2CC[C@@H1](.pdb'],  
 ['212\_lig212\_\\3D\_structure\_new\_colchicine211\_CN(C(=S)N[C@@H1]1C2=CC(=O)C(NC.pdb'],  
 ['213\_lig213\_\\3D\_structure\_new\_colchicine212\_CC(C)(C)OC1=CN(N=N1)[C@H1]C2CC.pdb'],

['214\_lig214\_\\3D\_structure\_new\_colchicine213\_CC(C)CCCCCN[C@@H1]1C2=CC(C(SC.pd  
 b'],  
 ['215\_lig215\_\\3D\_structure\_new\_colchicine214\_CC(C)(C)C(=O)N[C@@H1]1C=2C(C3=.pd  
 b'],  
 ['216\_lig216\_\\3D\_structure\_new\_colchicine215\_OC(CCC(C)C)OCC1=CN(N=N1)[C@H1].pd  
 b'],  
 ['217\_lig217\_\\3D\_structure\_new\_colchicine216\_0=C(NCC1=CC=CC=C1Cl)N[C@H1]2CC.pd  
 b'],  
 ['218\_lig218\_\\3D\_structure\_new\_colchicine217\_N([C@H1]1CCC2=C(C(OC)=C(OC)C(O.pd  
 b'],  
 ['219\_lig219\_\\3D\_structure\_new\_colchicine218\_0=CC=CCC=CNNC(N[C@H1]1CCC2=CC(.pd  
 b'],  
 ['21\_lig21\_\\3D\_structure\_new\_colchicine20\_CC(=O)N[C@@H1]1C2=CC(C(SC)=CC=.pdb'],  
 ['220\_lig220\_\\3D\_structure\_new\_colchicine219\_OC1=C(C=CC=C1)C=2N=NN(C=2)[C@H.pd  
 b'],  
 ['221\_lig221\_\\3D\_structure\_new\_colchicine220\_OC1=C(C=CC=C1)C=2N=NN(C=2)[C@H.pd  
 b'],  
 ['222\_lig222\_\\3D\_structure\_new\_colchicine221\_C1[C@@H1](C2=CC(=O)C(NC)=CC=C2.pd  
 b'],  
 ['223\_lig223\_\\3D\_structure\_new\_colchicine222\_0=C(OC(C)(C)C)N[C@H1]1CCC2=C(C.pd  
 b'],  
 ['224\_lig224\_\\3D\_structure\_new\_colchicine223\_0=C(OCC)CN(OCC)C[C@@H1]1C2=CC(.pd  
 b'],  
 ['225\_lig225\_\\3D\_structure\_new\_colchicine224\_0=C(C)OC1=CN(N=N1)[C@H1]2CCC3=.pd  
 b'],  
 ['226\_lig226\_\\3D\_structure\_new\_colchicine225\_0=C(OCC)CN(CCC)C[C@H1]C1CC2=CC.pd  
 b'],  
 ['227\_lig227\_\\3D\_structure\_new\_colchicine226\_0=C(C(Cl)Cl)NC(=O)N[C@H1]1CCC2.pd  
 b'],  
 ['228\_lig228\_\\3D\_structure\_new\_colchicine227\_0=C(C(Cl)Cl)NC(=O)N[C@H1]1CCC2.pd  
 b'],  
 ['229\_lig229\_\\3D\_structure\_new\_colchicine228\_0=C(OCCC)OCC1=CN(N=N1)[C@H1]2C.pd  
 b'],  
 ['22\_lig22\_\\3D\_structure\_new\_colchicine21\_0=C(OC)OC1=CC=C2C3=C(C(OC)=C(C.pdb'],  
 ['230\_lig230\_\\3D\_structure\_new\_colchicine229\_0=C(OCCC)OCC1=CN(N=N1)[C@H1]2C.pd  
 b'],  
 ['231\_lig231\_\\3D\_structure\_new\_colchicine230\_0=C(OCC=C)NCC1=CN(N=N1)[C@H1]2.pd  
 b'],  
 ['232\_lig232\_\\3D\_structure\_new\_colchicine231\_0=C(C(Cl)Cl)NCC1=CN(N=N1)[C@H1.pd  
 b'],  
 ['233\_lig233\_\\3D\_structure\_new\_colchicine232\_0=C(C(Cl)Cl)NCC1=CN(N=N1)[C@H1.pd  
 b'],  
 ['234\_lig234\_\\3D\_structure\_new\_colchicine233\_0=C(C)N[C@@H1]1CC(C2=C(C(OC)=C.pd  
 b'],  
 ['235\_lig235\_\\3D\_structure\_new\_colchicine234\_0=C(C(Cl)Cl)NC(=O)N[C@H1]1CCC2.pd  
 b'],  
 ['236\_lig236\_\\3D\_structure\_new\_colchicine235\_0=C(OCC)C1=CN(N=N1)[C@H1]2CCC3.pd

b'],  
 ['237\_lig237\_\\3D\_structure\_new\_colchicine236\_0=C(O)CN(CCO)C(=O)N[C@H1]1CCC2.pdb'],  
 ['238\_lig238\_\\3D\_structure\_new\_colchicine237\_CC(C)OC(NCC1=CN(N=N1) [C@H1] 2CC.pdb'],  
 ['239\_lig239\_\\3D\_structure\_new\_colchicine238\_COC(NCCCOCC1=CN(N=N1) [C@H1] 2CC.pdb'],  
 ['23\_lig23\_\\3D\_structure\_new\_colchicine22\_0=C(C)N[C@H1]1CCC2=CC(=C(OC)C(.pdb'],  
 ['240\_lig240\_\\3D\_zEatBw.pdb'],  
 ['241\_lig241\_\\3D\_structure\_new\_colchicine240\_C1=CN=CC=C1C2=CN(N=N2) [C@H1] 3C.pdb'],  
 ['242\_lig242\_\\3D\_structure\_new\_colchicine241\_COC=C(OC)C(OC)=CCCC[C@H1] (N1C=.pdb'],  
 ['243\_lig243\_\\3D\_structure\_new\_colchicine242\_COC1=C(OC)C=CC=2CC[C@@H1] (C3=C.pdb'],  
 ['244\_lig244\_\\3D\_structure\_new\_colchicine243\_CC(C)(O)C=CN([C@H1]1CCC2=CC(OC.pdb'],  
 ['245\_lig245\_\\3D\_structure\_new\_colchicine244\_C=12C(=CC(C(NC)=CC=1)=O) [C@H1] .pdb'],  
 ['246\_lig246\_\\3D\_structure\_new\_colchicine245\_NC(=O)NCC1=CN(N=N1) [C@H1] 2CCC3.pdb'],  
 ['247\_lig247\_\\3D\_structure\_new\_colchicine246\_C1=CC(OC)=CC=C1CN[C@H1] 2CCC3=C.pdb'],  
 ['248\_lig248\_\\3D\_structure\_new\_colchicine247\_N(C(C1=CC=CC=C1)=O)CCN[C@H1] 2C.pdb'],  
 ['249\_lig249\_\\3D\_structure\_new\_colchicine248\_N=NC(=C(C(OC)=O)N[C@H1] 1CCC2=.pdb'],  
 ['24\_lig24\_\\3D\_structure\_new\_colchicine23\_CC(=O)OCC1=CN(N=N1) [C@H1] 2CCC3.pdb'],  
 ['250\_lig250\_\\3D\_structure\_new\_colchicine249\_CNC=1C(=O)C=C2[C@H1] (CCC3=C(C(.pdb'],  
 ['251\_lig251\_\\3D\_structure\_new\_colchicine250\_NN(C=C(CNC(CCCCC1)=O)N=N) [C@H1.pdb'],  
 ['252\_lig252\_\\3D\_structure\_new\_colchicine251\_N=NC1=CN(N=N1) [C@H1] 2CCC3=CC(O.pdb'],  
 ['253\_lig253\_\\3D\_structure\_new\_colchicine252\_CC(C)(C)OC(=O)NCCC(NCC=1N=NN(C.pdb'],  
 ['254\_lig254\_\\3D\_structure\_new\_colchicine253\_CC(C)(C)OCNCCC(=O)NCC1=CN(N=N1.pdb'],  
 ['255\_lig255\_\\3D\_structure\_new\_colchicine254\_C1(=CN(C(=O)OCC)N[C@@H1] 2C=3C(.pdb'],  
 ['256\_lig256\_\\3D\_structure\_new\_colchicine255\_CC(C)(C)OCNCCC(=O)NCC1=CN(N=N1.pdb'],  
 ['257\_lig257\_\\3D\_structure\_new\_colchicine256\_CC(C)(C)OC(=O)NCCC(OCC=1N=NN(C.pdb'],  
 ['258\_lig258\_\\3D\_QxX7hq.pdb'],  
 ['259\_lig259\_\\3D\_structure\_new\_colchicine258\_C=1N(N=NC=1C(OC)=O) [C@H1] 2CCC.pdb'],

['25\_lig25\_\\3D\_structure\_new\_colchicine24\_CC(=O)OCC1=CN(N=N1)[C@H1]2CCC3.pdb'],  
 ['260\_lig260\_\\3D\_structure\_new\_colchicine259\_0=CC=CN=NN[C@H1]1CCC2=C(C(OC)=.pd  
 b'],  
 ['261\_lig261\_\\3D\_structure\_new\_colchicine260\_C1=CN=CC=C1C(NCC2=CN(N=N2)[C@H.pd  
 b'],  
 ['262\_lig262\_\\3D\_structure\_new\_colchicine261\_N=NN([C@H1]1CCC2=C(C(OC)=C(OC).pd  
 b'],  
 ['263\_lig263\_\\3D\_structure\_new\_colchicine262\_CN(N([C@@H1]1C2=CC(=O)C(NC)=CC.pd  
 b'],  
 ['264\_lig264\_\\3D\_structure\_new\_colchicine263\_CN(N([C@@H1]1C2=CC(=O)C(NC)=CC.pd  
 b'],  
 ['265\_lig265\_\\3D\_structure\_new\_colchicine264\_0=C(CC)OCC1=CN(N=N1)[C@H1]2CCC.pd  
 b'],  
 ['266\_lig266\_\\3D\_structure\_new\_colchicine265\_0=C(OC(C)(C)C)NCC=1N=NN(C=1)[C.pd  
 b'],  
 ['267\_lig267\_\\3D\_structure\_new\_colchicine266\_0=C(C(C)C)NCN[C@H1]1CCC2=CC(OC.pd  
 b'],  
 ['268\_lig268\_\\3D\_structure\_new\_colchicine267\_0=C(OCC)C=1N(N=NC=1C(=O)O2)[C@.pd  
 b'],  
 ['269\_lig269\_\\3D\_structure\_new\_colchicine268\_CC(O)(C)CC(=O)OCC1=CN(N=N1)[C@.pd  
 b'],  
 ['26\_lig26\_\\3D\_structure\_new\_colchicine25\_CC(=O)N[C@@H1]1C2=CC(C(NC)=CC=.pdb'],  
 ['270\_lig270\_\\3D\_structure\_new\_colchicine269\_CC(C)COC(NCC1=CN(N=N1)[C@H1]C2.pd  
 b'],  
 ['271\_lig271\_\\3D\_structure\_new\_colchicine270\_COCNCC1=CN(N=N1)[C@H1]2CCC3=CC.pd  
 b'],  
 ['272\_lig272\_\\3D\_structure\_new\_colchicine271\_CC(C)(C)OC(NCC=1N=NN(C=1)[C@H1.pd  
 b'],  
 ['273\_lig273\_\\3D\_structure\_new\_colchicine272\_N(C)C1=CC=C2C3=C(OC)C(OC)=C(OC.pd  
 b'],  
 ['274\_lig274\_\\3D\_structure\_new\_colchicine273\_0=C(OCC)C1=C(C(OCC)=O)N=NN1[C@.pd  
 b'],  
 ['275\_lig275\_\\3D\_structure\_new\_colchicine274\_N([C@H1]1CCC2=CC(OC)=C(OC)C(OC.pd  
 b'],  
 ['276\_lig276\_\\3D\_structure\_new\_colchicine275\_CC(CC)N[C@H1]C1CC2=CC(OC)=C(OC.pd  
 b'],  
 ['277\_lig277\_\\3D\_structure\_new\_colchicine276\_CC(CC)N[C@H1]C1CC2=CC(OC)=C(OC.pd  
 b'],  
 ['278\_lig278\_\\3D\_structure\_new\_colchicine277\_COC1=C2C3=CC=C(NC)C(=O)C=C3[C@.pd  
 b'],  
 ['279\_lig279\_\\3D\_structure\_new\_colchicine278\_COC1=C2C3=CC=C(NC)C(=O)C=C3[C@.pd  
 b'],  
 ['27\_lig27\_\\3D\_structure\_new\_colchicine26\_CC(=O)N[C@@H1]C1=C2C(C(NC)=CC=.pdb'],  
 ['280\_lig280\_\\3D\_structure\_new\_colchicine279\_COC1=C2C3=CC=C(SC)C(=O)C=C3[C@.pd  
 b'],  
 ['281\_lig281\_\\3D\_structure\_new\_colchicine280\_0(C1=C(OC)C=2C3=CC=C(SC)C(C=C3.pd  
 b'],

['282\_lig282\_\\3D\_structure\_new\_colchicine281\_C1=CN=CC=C1CN[C@H1]2CCC3=CC(OC.pdb'],  
 ['283\_lig283\_\\3D\_structure\_new\_colchicine282\_0=CC1=CN=NN1[C@H1]2CCC3=CC(OC).pdb'],  
 ['284\_lig284\_\\3D\_structure\_new\_colchicine283\_NC(CCN[C@H1]1CCC2=CC(OC)=C(OC).pdb'],  
 ['285\_lig285\_\\3D\_structure\_new\_colchicine284\_NC(N=C1C=CC2)=CC=C1C3=C(OC)C(OC.pdb'],  
 ['286\_lig286\_\\3D\_structure\_new\_colchicine285\_C=CC1=C(NC)C(OC)=C(OC)C=C1CC[C@H1].pdb'],  
 ['287\_lig287\_\\3D\_structure\_new\_colchicine286\_CC(N)(CCO)[C@H1]1CCC2=CC(OC)=C.pdb'],  
 ['288\_lig288\_\\3D\_structure\_new\_colchicine287\_N(NCCCCC1)[C@H1]1CCC2=CC(OC)=C.pdb'],  
 ['289\_lig289\_\\3D\_structure\_new\_colchicine288\_N(C1=CC=C(C=C1)C)CN[C@H1]2CCC3.pdb'],  
 ['28\_lig28\_\\3D\_structure\_new\_colchicine27\_COC1=C2C3=CC=C(NC)C(=O)C=C3[C@H1].pdb'],  
 ['290\_lig290\_\\3D\_structure\_new\_colchicine289\_N(C1=CC=C(C=C1)C)CN[C@H1]2CCC3.pdb'],  
 ['291\_lig291\_\\3D\_structure\_new\_colchicine290\_CCN(CC)C(=O)N[C@H1]C1CC2=CC(OC.pdb'],  
 ['292\_lig292\_\\3D\_structure\_new\_colchicine291\_CCN(CC)C(=O)N1[C@H1]CCC2=CC(OC.pdb'],  
 ['293\_lig293\_\\3D\_structure\_new\_colchicine292\_CCN(CC)C(=O)N[C@H1]1CCC2=CC(OC.pdb'],  
 ['294\_lig294\_\\3D\_structure\_new\_colchicine293\_CC(C)COC1=C(OC)C(OC)=CC=2CC[C@H1].pdb'],  
 ['295\_lig295\_\\3D\_structure\_new\_colchicine294\_C=C(C)CN(CCO)C(=S)N[C@H1]1CCC2.pdb'],  
 ['296\_lig296\_\\3D\_structure\_new\_colchicine295\_CC(C)C(OC=C(C(OC)=CCCC[C@H1](N.pdb'],  
 ['297\_lig297\_\\3D\_structure\_new\_colchicine296\_N([C@H1]1CCC2=CC(OC)=C(OC)C(OC.pdb'],  
 ['298\_lig298\_\\3D\_structure\_new\_colchicine297\_0=C(N[C@H1]1CCC2=CC(OC)=C(OC)C.pdb'],  
 ['299\_lig299\_\\3D\_structure\_new\_colchicine298\_0=C(N[C@H1]1C2=CC(C(NC)=CC=C2.pdb'],  
 ['29\_lig29\_\\3D\_structure\_new\_colchicine28\_COC1=C2C3=CC=C(NC)C(=O)C=C3[C@H1].pdb'],  
 ['2\_lig2\_\\3D\_structure\_new\_colchicine1\_COC1=C2C3=CC=C(NC)C(=O)C=C3[C@H1].pdb'],  
 ['300\_lig300\_\\3D\_structure\_new\_colchicine299\_N([C@H1]1CCC2=CC(OC)=C(OC)C(OC.pdb'],  
 ['301\_lig301\_\\3D\_structure\_new\_colchicine300\_0=C(N[C@H1]1CCC2=CC(OC)=C(OC)C.pdb'],  
 ['302\_lig302\_\\3D\_structure\_new\_colchicine301\_C1=CCC[C@H1](NC(=S)NC2=CC=C(C=.pdb'],  
 ['303\_lig303\_\\3D\_structure\_new\_colchicine302\_CNCC(O)(C)C1=CN(N=N1)[C@H1]2CC.pdb'],



['304\_lig304\_\\3D\_structure\_new\_colchicine303\_N1([C@H1]2CCC3=C(C(OC)=C(OC)C(.pd  
 b'],  
 ['305\_lig305\_\\3D\_structure\_new\_colchicine304\_N([C@H1]1CCC2=C(C(OC)=C(OC)C(0.pd  
 b'],  
 ['306\_lig306\_\\3D\_structure\_new\_colchicine305\_C1=C(O)C(OC)=CC(CN[C@H1]2CCC3=.pd  
 b'],  
 ['307\_lig307\_\\3D\_structure\_new\_colchicine306\_C0CC(C)=C(C(OC)=CCCC[C@H1](NCC.pd  
 b'],  
 ['308\_lig308\_\\3D\_structure\_new\_colchicine307\_C[C@H1](CCC1=CC(OC)=C(OC)C(OC).pd  
 b'],  
 ['309\_lig309\_\\3D\_structure\_new\_colchicine308\_NC(=O)N1[C@@H1]C2=CC(C(NC)=CC=.pd  
 b'],  
 ['30\_lig30\_\\3D\_structure\_new\_colchicine29\_C0C1=C2C3=CC=C(NC)C(=O)C=C3[C@.pdb'],  
 ['310\_lig310\_\\3D\_structure\_new\_colchicine309\_NN(CC0)[C@@H1]1C2=CC(C(NC)=CC=.pd  
 b'],  
 ['311\_lig311\_\\3D\_structure\_new\_colchicine310\_C1=2[C@H1](CCC3=CC(OC)=C(OC)C(.pd  
 b'],  
 ['312\_lig312\_\\3D\_structure\_new\_colchicine311\_NC(N=NC0CCC)C[C@H1]1C2=CC(C(NC.pd  
 b'],  
 ['313\_lig313\_\\3D\_structure\_new\_colchicine312\_C1=2C(C3=C(OC)C(OC)=C(OC)C=C3C.pd  
 b'],  
 ['314\_lig314\_\\3D\_structure\_new\_colchicine313\_C1=C(CN[C@H1]2CCC3=CC(OC)=C(OC.pd  
 b'],  
 ['315\_lig315\_\\3D\_structure\_new\_colchicine314\_C1[C@H1](NC(NC2=CC=C(C=C2)F)=0.pd  
 b'],  
 ['316\_lig316\_\\3D\_structure\_new\_colchicine315\_C1=CC(=CC=N1)CCN[C@@H1]2C3=CC(.pd  
 b'],  
 ['317\_lig317\_\\3D\_structure\_new\_colchicine316\_C1=2[C@H1]CCC3=CC(OC)=C(OC)C(0.pd  
 b'],  
 ['318\_lig318\_\\3D\_structure\_new\_colchicine317\_CC=CC1=C(C=C(OC)C(OC)=C10C(OCC.pd  
 b'],  
 ['319\_lig319\_\\3D\_structure\_new\_colchicine318\_0=C1C=C2[C@H1](CCC3=C(C(OC)=C(.pd  
 b'],  
 ['31\_lig31\_\\3D\_structure\_new\_colchicine30\_C0C1=C2C3=CC=C(NC)C(=O)C=C3[C@.pdb'],  
 ['320\_lig320\_\\3D\_structure\_new\_colchicine319\_0=C1C=C2[C@H1](CCC3=C(C(OC)=C(.pd  
 b'],  
 ['321\_lig321\_\\3D\_structure\_new\_colchicine320\_0=C1C=C2[C@H1](CCC3=C(C(OC)=C(.pd  
 b'],  
 ['322\_lig322\_\\3D\_structure\_new\_colchicine321\_N1C=NN=NN1[C@H1]2CCC3=C(C(OC)=.pd  
 b'],  
 ['323\_lig323\_\\3D\_structure\_new\_colchicine322\_CNC=1C(=O)C=C2[C@H1](CCC3=CC(0.pd  
 b'],  
 ['324\_lig324\_\\3D\_structure\_new\_colchicine323\_N([C@H1]1CCC2=CC(OC)=C(OC)C(OC.pd  
 b'],  
 ['325\_lig325\_\\3D\_structure\_new\_colchicine324\_C[C@H1](CCC1=CC(OC)=C(OC)C(OC).pd  
 b'],  
 ['326\_lig326\_\\3D\_structure\_new\_colchicine325\_N([C@H1]1CCC2=C(C(OC)=C(OC)C(0.pd

b'],  
 ['327\_lig327\_\\3D\_structure\_new\_colchicine326\_C=CC1=C(C(=O)OC=CC=C2C3=C(OC)C.pdb'],  
 b'],  
 ['328\_lig328\_\\3D\_structure\_new\_colchicine327\_C=C1C2=C(C=C(OC)C(OC)=C2OC(OCC.pdb'],  
 b'],  
 ['329\_lig329\_\\3D\_structure\_new\_colchicine328\_CC=CC(N[C@H1]1CCC2=C(C(OC)=C(O.pdb'],  
 b'],  
 ['32\_lig32\_\\3D\_structure\_new\_colchicine31\_COC1=C(OC)C(OC)=CC=2CC[C@H1](N.pdb'],  
 ['330\_lig330\_\\3D\_structure\_new\_colchicine329\_OC(=O)NCC1=CN(N=N1)[C@@H1]2C=3.pdb'],  
 b'],  
 ['331\_lig331\_\\3D\_structure\_new\_colchicine330\_N(C)C=1C(=O)C=C2[C@H1](CCC3=C(.pdb'],  
 b'],  
 ['332\_lig332\_\\3D\_structure\_new\_colchicine331\_0=C(C=C(C(O1)CCCCC1)CN=N)N[C@.pdb'],  
 b'],  
 ['333\_lig333\_\\3D\_structure\_new\_colchicine332\_N([C@H1]1CCC2=C(C(OC)=C(OC)C(O.pdb'],  
 b'],  
 ['334\_lig334\_\\3D\_structure\_new\_colchicine333\_0=C(C=C(C1)C=CN([C@H1]1CCC2=C(.pdb'],  
 b'],  
 ['335\_lig335\_\\3D\_04ZgW2.pdb'],  
 ['336\_lig336\_\\3D\_L9ZpgB.pdb'],  
 ['337\_lig337\_\\3D\_structure\_new\_colchicine336\_C12=C3C(C4=C(OC)C(OC)=C(OC)C=C.pdb'],  
 b'],  
 ['33\_lig33\_\\3D\_structure\_new\_colchicine32\_CNC(NCCCC)=S[C@@H1]C1=CC(=O)C(.pdb'],  
 ['34\_lig34\_\\3D\_structure\_new\_colchicine33\_CN(C(=S)N[C@@H1]1C2=CC(=O)C(NC.pdb'],  
 ['35\_lig35\_\\3D\_structure\_new\_colchicine34\_CNC(C(C)C)N[C@@H1]1C=2C(C3=C(C.pdb'],  
 ['36\_lig36\_\\3D\_structure\_new\_colchicine35\_COC1=C(OC)C(OC)=CC=2CC[C@@H1](.pdb'],  
 ['37\_lig37\_\\3D\_structure\_new\_colchicine36\_COC1=C(OC)C(OC)=CC=2CC[C@@H1](.pdb'],  
 ['38\_lig38\_\\3D\_structure\_new\_colchicine37\_CC(C)(C)COC1=CC=C2C3=C(OC)C(OC.pdb'],  
 ['39\_lig39\_\\3D\_structure\_new\_colchicine38\_C1=2[C@H1]CCC3=CC(OC)=C(OC)C(O.pdb'],  
 ['3\_lig3\_\\3D\_structure\_new\_colchicine2\_COC1=C2C3=CC=C(NC)C(=O)C=C3[C@.pdb'],  
 ['40\_lig40\_\\3D\_structure\_new\_colchicine39\_OC(CCC(C)C)OCC1=CN(N=N1)[C@H1].pdb'],  
 ['41\_lig41\_\\3D\_structure\_new\_colchicine40\_OC1=C(C=CC=C1)C=2N=NN(C=2)[C@H.pdb'],  
 ['42\_lig42\_\\3D\_structure\_new\_colchicine41\_NC1=CN(N=N1)[C@H1]2CCC3=C(C(OC.pdb'],  
 ['43\_lig43\_\\3D\_structure\_new\_colchicine42\_0=C(OCC)CN(CCO)N[C@H1]1CCC2=CC.pdb'],  
 ['44\_lig44\_\\3D\_structure\_new\_colchicine43\_0=C(C1=C(C(OCC)=O)N(N=N1)[C@@H.pdb'],  
 ['45\_lig45\_\\3D\_structure\_new\_colchicine44\_C1=2[C@H1](CCC3=CC(OC)=C(OC)C(.pdb'],  
 ['46\_lig46\_\\3D\_structure\_new\_colchicine45\_C=12N(N=NC=1C(OCC3=CC=C(C=C3)F.pdb'],  
 ['47\_lig47\_\\3D\_structure\_new\_colchicine46\_C=1N(N=NC=1C(=O)OCC2=CC=C(C=C2.pdb'],  
 ['48\_lig48\_\\3D\_structure\_new\_colchicine47\_0=CC1=C(C(OCC)=O)N(N=N1)[C@@H1.pdb'],  
 ['49\_lig49\_\\3D\_structure\_new\_colchicine48\_0=C(C(C1)C1)NC(=O)N[C@H1]1CCC2.pdb'],  
 ['4\_lig4\_\\3D\_structure\_new\_colchicine3\_COC1=C2C3=CC=C(NC)C(=O)C=C3[C@.pdb'],  
 ['50\_lig50\_\\3D\_structure\_new\_colchicine49\_0=C(C(C1)C1)NCC1=CN(N=N1)[C@H1.pdb'],  
 ['51\_lig51\_\\3D\_structure\_new\_colchicine50\_0=C(C(C1)C1)NC(=O)N[C@H1]1CCC2.pdb'],  
 ['52\_lig52\_\\3D\_structure\_new\_colchicine51\_0=C(O)C=C(C(OCC)=O)N=NN[C@H1]1.pdb'],  
 ['53\_lig53\_\\3D\_structure\_new\_colchicine52\_0=C(O)C1=C(C(OCC)=O)N=NN1[C@H1.pdb'],  
 ['54\_lig54\_\\3D\_structure\_new\_colchicine53\_0=C(OCC)C1=CN(N=N1)[C@H1]2CCC3.pdb'],  
 ['55\_lig55\_\\3D\_structure\_new\_colchicine54\_0=C(O)C1=CN(N=N1)[C@H1]2CCC3=C.pdb'],

['56\_lig56\_\\3D\_structure\_new\_colchicine55\_0=C(O)C1=C(C(OCC)=O)N=NN1[C@H1].pdb'],  
 ['57\_lig57\_\\3D\_structure\_new\_colchicine56\_CCCCCCCCCCCCCCCC(OCC1=CN(N=N1)[C@H1].pdb'],  
 ['58\_lig58\_\\3D\_structure\_new\_colchicine57\_OC(=O)C1=C(C(OCC)=O)N(N=N1)[C@H1].pdb'],  
 ['59\_lig59\_\\3D\_structure\_new\_colchicine58\_C1=C(OC)C=C(OC)C=C1CC[C@H1](C=.pdb'],  
 ['5\_lig5\_\\3D\_structure\_new\_colchicine4\_0=CC1=CN=NN1[C@H1]2CCC3=CC(OC).pdb'],  
 ['60\_lig60\_\\3D\_structure\_new\_colchicine59\_N(C)C(=O)NCCC(OCC1=CN(N=N1)[C@H1].pdb'],  
 ['61\_lig61\_\\3D\_structure\_new\_colchicine60\_OC(=O)C=C(C(OCC)=O)N(NCCC)N[C@H1].pdb'],  
 ['62\_lig62\_\\3D\_structure\_new\_colchicine61\_C[C@H1](NCC)CC1=CC(C(NC)=CC=C1.pdb'],  
 ['63\_lig63\_\\3D\_NsTQ4B.pdb'],  
 ['64\_lig64\_\\3D\_structure\_new\_colchicine63\_N1=NN1[C@@H1]2C3=CC(C(NC)=CC=C.pdb'],  
 ['65\_lig65\_\\3D\_structure\_new\_colchicine64\_0=CC=CC=CC(NCC1=CN(N=N1)[C@H1].pdb'],  
 ['66\_lig66\_\\3D\_structure\_new\_colchicine65\_CN(N[C@@H1]1C2=CC(=O)C(NC)=CC.pdb'],  
 ['67\_lig67\_\\3D\_structure\_new\_colchicine66\_CC(C)C(=O)OCC1=CN(N=N1)[C@H1]2.pdb'],  
 ['68\_lig68\_\\3D\_structure\_new\_colchicine67\_N(C(C1=CC=NC=C1)=O)[C@@H1]2C=3.pdb'],  
 ['69\_lig69\_\\3D\_structure\_new\_colchicine68\_N1(CCCC1)CN[C@H1]2CCC3=C(C(OC).pdb'],  
 ['6\_lig6\_\\3D\_structure\_new\_colchicine5\_OC1=CC=C(C=C1)CN[C@H1]2CCC3=C(.pdb'],  
 ['70\_lig70\_\\3D\_structure\_new\_colchicine69\_N1(CCCC1)C(=O)OC2=C(OC)C(OC3)=.pdb'],  
 ['71\_lig71\_\\3D\_structure\_new\_colchicine70\_CNC=1C(=O)C=C2[C@H1](CCC3=CC(O.pdb'],  
 ['72\_lig72\_\\3D\_structure\_new\_colchicine71\_CC(C)(C)OC(=O)NCCC(NCC=1N=NN(C.pdb'],  
 ['73\_lig73\_\\3D\_8godGN.pdb'],  
 ['74\_lig74\_\\3D\_structure\_new\_colchicine73\_CC(C)(C)OCNCCC(=O)NCC1=CN(N=N1.pdb'],  
 ['75\_lig75\_\\3D\_YDrpzN.pdb'],  
 ['76\_lig76\_\\3D\_structure\_new\_colchicine75\_CC(C)(C)OC(=O)NCCC(OCC=1N=NN(C.pdb'],  
 ['77\_lig77\_\\3D\_structure\_new\_colchicine76\_CC(C)(C)OC(=O)NCCC(NCC=1N=NN(C.pdb'],  
 ['78\_lig78\_\\3D\_structure\_new\_colchicine77\_CNCCC1=CC=C(C=C1)NC(=O)N[C@H1].pdb'],  
 ['79\_lig79\_\\3D\_structure\_new\_colchicine78\_CNCC(C1=CC=C(C=C1)NC(=O)N[C@@H1].pdb'],  
 ['7\_lig7\_\\3D\_structure\_new\_colchicine6\_OC1=CC=C(C=C1)CN[C@H1]2CCC3=CC.pdb'],  
 ['80\_lig80\_\\3D\_structure\_new\_colchicine79\_0=C(OC)OCC1=CN(N=N1)[C@H1]2CCC.pdb'],  
 ['81\_lig81\_\\3D\_structure\_new\_colchicine80\_0=C(C(C)C)NC(=S)N[C@@H1]1C=2C(.pdb'],  
 ['82\_lig82\_\\3D\_structure\_new\_colchicine81\_0=C(OCC)OCC=1N=NN(C=1)[C@H1]2C.pdb'],  
 ['83\_lig83\_\\3D\_structure\_new\_colchicine82\_0=C(OCC)CN(CCO)C(=S)N[C@H1]1CC.pdb'],  
 ['84\_lig84\_\\3D\_structure\_new\_colchicine83\_CC(C)CNCC1=CN(N=N1)[C@H1]2CCC3.pdb'],  
 ['85\_lig85\_\\3D\_structure\_new\_colchicine84\_CC(C)CNCC1=CN(N=N1)[C@H1]2CCC3.pdb'],  
 ['86\_lig86\_\\3D\_structure\_new\_colchicine85\_COCNCC1=CN(N=N1)[C@H1]2CCC3=CC.pdb'],  
 ['87\_lig87\_\\3D\_structure\_new\_colchicine86\_N(C(C)C)C(NCC1=CN(N=N1)[C@H1]2.pdb'],  
 ['88\_lig88\_\\3D\_structure\_new\_colchicine87\_N(C)C1=CC=C2C3=C(OC)C(OC)=C(OC.pdb'],  
 ['89\_lig89\_\\3D\_structure\_new\_colchicine88\_N(C(C(C)C)=O)C1=CN(N=N1)[C@H1].pdb'],  
 ['8\_lig8\_\\3D\_structure\_new\_colchicine7\_0=CC1=C2[C@H1](CCC3=CC(OC)=C(O.pdb'],  
 ['90\_lig90\_\\3D\_structure\_new\_colchicine89\_N(CCCCCC=O)CC1=CN(N=N1)[C@H1].pdb'],  
 ['91\_lig91\_\\3D\_structure\_new\_colchicine90\_C1=C(C=CC(C1)=C1)COC(=O)CN[C@@H1].pdb'],  
 ['92\_lig92\_\\3D\_structure\_new\_colchicine91\_N(C)C1=CC=C2C3=C(OC)C(OC)=C(OC.pdb'],  
 ['93\_lig93\_\\3D\_structure\_new\_colchicine92\_N(C)C1=CC=C2C3=C(OC)C(OC)=C(OC.pdb'],  
 ['94\_lig94\_\\3D\_structure\_new\_colchicine93\_N(C(C)C)CC(=O)OCC1=C2N(N=N1)[C.pdb'],  
 ['95\_lig95\_\\3D\_structure\_new\_colchicine94\_CC(CC)N[C@@H1]1C2=CC(C(SC)=CC=.pdb'],  
 ['96\_lig96\_\\3D\_structure\_new\_colchicine95\_CC(CC)N[C@@H1]C1=C2C(C(NC)=CC=.pdb'],  
 ['97\_lig97\_\\3D\_structure\_new\_colchicine96\_COC1=C2C3=CC=C(NC)C(=O)C=C3[C@H1].pdb'],  
 ['98\_lig98\_\\3D\_structure\_new\_colchicine97\_N(C)C=1C(=O)C=C2[C@H1](CCC3=CC.pdb'],

```
['99_lig99_\\3D_structure_new_colchicine98_CNC=1C(C=C2[C@H1](CCC3=C(C(OC).pdb'],
['9_lig9_\\3D_structure_new_colchicine8_C1=2[C@H1](CCC3=CC(OC)=C(OC)C(.pdb']]
```

```
[19]: pdirs[1][0]
```

```
[19]: '101_lig101_\\3D_structure_new_colchicine100_OCCN(CC=C)C(=O)N[C@H1]1C2=CC(.pdb'
```

```
[20]: with open('Prepare_pdbqt_from_pdb.txt', 'w') as f:
      for line in pdirs:
          f.write('obabel ')
          f.write(str("")+line[0]+str(""))
          f.write(' -O ')
          f.write(line[0].split('\\')[0]+str('\\')+line[0].split('\\')[0]+str('.
      ↪pdbqt'))
          f.write('\\n')
```

1.4 Run generated code in the command prompt in the directory where the file is created

1.5 distribute protein - the receptor should be prepared before running below code in the \*.pdbqt file (with polar H)

1.6 1SA0\_AB\_chains\_prot\_polar\_H.pdbqt

```
[21]: name_of_prepared_receptor = str(input('Please use the name given for your_
      ↪protein domain after preparation... (For example 5v5z_polar_H.pdbqt) : '))
```

Please use the name given for your protein domain after preparation... (For example 5v5z\_polar\_H.pdbqt) : 1SA0\_AB\_chains\_prot\_polar\_H.pdbqt

```
[22]: to_be_moved_to = list_dir
```

```
[23]: to_be_moved_to[0].split("\\")[-1]
```

```
[23]: '1_lig1_'
```

```
[24]: to_be_moved_to[0]
```

```
[24]: 'C:\\Users\\aleks\\Documents\\GitHub\\Kolchicina\\Molecular docking\\1_lig1_'
```

1.7 The initial config file should be prepared before running this code, exemplary one is in the repo

```
[25]: with open('config.txt') as f:
      lines = f.readlines()
```

```
[26]: lines
```

```
[26]: ['receptor = 1SA0_AB_chains_prot_polar_H.pdbqt\n',
      'ligand = 1SA0_AB_chains_colchicine_only.pdbqt\n',
      '\n',
      'center_x = 119.743\n',
      'center_y = 92.779\n',
      'center_z = 10.765\n',
      '\n',
      'size_x = 44\n',
      'size_y = 44\n',
      'size_z = 60\n',
      '\n',
      'out = blind_try_lig_1_pub_1.pdbqt\n',
      '\n',
      'exhaustiveness = 32\n']
```

```
[27]: run_multiple_mol_doc = True #it changes the config.txt file in order to conduct
      ↪ more MDs
      if run_multiple_mol_doc == True:

          for folder in to_be_moved_to:
              shutil.copy(name_of_prepared_receptor, folder)
              shutil.copy('config.txt', folder)
              with open(str(folder+str('\config.txt'))) as f:
                  lines = f.readlines()
                  lines[0] = str('receptor = '+folder.
                  ↪split("\\")[-1]+'\\'+1SA0_AB_chains_prot_polar_H.pdbqt')
                  lines[1] = str('ligand = '+folder.split("\\")[-1]+'\\'+folder.
                  ↪split("\\")[-1]+'pdbqt')
                  lines[11] = str('out = '+folder.
                  ↪split("\\")[-1]+'\\docking_result_'+folder.split("\\")[-1]+'pdbqt')
                  with open(str(folder+str('\config.txt')), 'w') as f:

                      for line in lines:
                          f.write(line)
                          f.write('\n')
              else:
                  for folder in to_be_moved_to:
                      shutil.copy(name_of_prepared_receptor, folder)
                      shutil.copy('config.txt', folder)
                      with open(str(folder+str('\config.txt'))) as f:
                          lines = f.readlines()
                          lines[1] = str('ligand = '+folder.split("\\")[-1]+'pdbqt')
                          lines[11] = str('out = docking_result_'+folder.split("\\")[-1]+'
                          ↪pdbqt')
                          with open(str(folder+str('\config.txt')), 'w') as f:

                              for line in lines:
```

```

        f.write(line)
        f.write('\n')

## Copy ligands to one directory
try:
    os.mkdir("Prepared_ligands")
except:
    pass
ligands_in_one_dir = False
if ligands_in_one_dir is not True:
    ligands_names = []
    for folder_name in to_be_moved_to:
        ligands_names.append(folder_name.split("\\")[-1]+str('\\')+folder_name.
↳split("\\")[-1]+'.pdbqt')
    for directory, file in enumerate(ligands_names):
        shutil.copy(file, 'Prepared_ligands\\')

## Distribute ligands if prepared
pdbqt_ligands_prepared = True
if pdbqt_ligands_prepared == True:
    ligands_names = []
    for folder_name in to_be_moved_to:
        ligands_names.append(folder_name.split("\\")[-1]+'.pdbqt')
    for directory, ligand in enumerate(ligands_names):
        shutil.copy('Prepared_ligands\\'+str(ligand), to_be_moved_to[directory])

```

## 1.8 prepare one file to be executed via prompt

```

[30]: with open('to_be_executed.txt', 'w') as f:
    for element in to_be_moved_to:
        f.write('vina --config ')
        f.write(str(element.split("\\")[-1]))
        f.write('\\config.txt --log ')
        f.write(str(element.split("\\")[-1]))
        f.write('\\MD_log_.txt &')
        f.write('\n')

```

## 2 Run after molecular docking procedure is completed - after execution of “to\_be\_executed.txt”

### 2.1 load molecular docking results into table

```
[1]: import pandas as pd

[2]: to_be_moved_to = pd.read_excel('to_be_moved_to.xlsx')
to_be_moved_to = list(to_be_moved_to['Name'])

[3]: to_be_moved_to[0]

[3]: 'C:\\Users\\aleks\\Documents\\GitHub\\Kolchicyna\\Molecular docking\\1_lig1_'

[4]: with open(str(to_be_moved_to[0]+str('\\MD_log_.txt')) as f:
      lines = f.readlines()

[5]: lines

[5]: [ '#####\n',
      '# If you used AutoDock Vina in your work, please cite:      #\n',
      '#                                                              #\n',
      '# O. Trott, A. J. Olson,                                       #\n',
      '# AutoDock Vina: improving the speed and accuracy of docking  #\n',
      '# with a new scoring function, efficient optimization and      #\n',
      '# multithreading, Journal of Computational Chemistry 31 (2010) #\n',
      '# 455-461                                                         #\n',
      '#                                                              #\n',
      '# DOI 10.1002/jcc.21334                                         #\n',
      '#                                                              #\n',
      '# Please see http://vina.scripps.edu for more information.      #\n',
      '#####\n',
      '\n',
      'WARNING: The search space volume > 27000 Angstrom^3 (See FAQ)\n',
      'Detected 16 CPUs\n',
      'Reading input ... done.\n',
      'Setting up the scoring function ... done.\n',
      'Analyzing the binding site ... done.\n',
      'Using random seed: 1838683264\n',
      'Performing search ... done.\n',
      'Refining results ... done.\n',
      '\n',
      'mode |  affinity | dist from best mode\n',
      '      | (kcal/mol) | rmsd l.b. | rmsd u.b.\n',
      '-----+-----+-----+-----\n',
      '  1      -7.8      0.000      0.000\n',
      '  2      -7.1     12.902     16.240\n',
      '  3      -7.0      4.737      7.990
```

```
' 4      -7.0      6.668      11.525\n',
' 5      -6.8     14.405     17.577\n',
' 6      -6.8      3.849      6.534\n',
' 7      -6.8      2.870      6.691\n',
' 8      -6.7      5.120      8.342\n',
' 9      -6.7     11.843     15.491\n',
'Writing output ... done.\n']
```

```
[6]: lines[-10]
```

```
[6]: ' 1      -7.8      0.000      0.000\n'
```

```
[7]: lines[-10][12:18]
```

```
[7]: ' -7.8 '
```

```
[8]: affinities = []
for element in lines[-10:-1]:
    affinities.append(element[12:18])
```

```
[9]: affinities
```

```
[9]: [' -7.8 ',
' -7.1 ',
' -7.0 ',
' -7.0 ',
' -6.8 ',
' -6.8 ',
' -6.8 ',
' -6.7 ',
' -6.7 ']
```

```
[10]: float(affinities[0])
```

```
[10]: -7.8
```

```
[11]: floats = [float(x) for x in affinities]
```

## 2.2 construct dataframe

```
[12]: df = pd.DataFrame(data=floats, columns=[str(to_be_moved_to[0].split("\\\\")[-1])])
```

```
[13]: df
```

```
[13]:   1_lig1_
0    -7.8
1    -7.1
2    -7.0
```



```

3      -7.0
4      -6.8
5      -6.8
6      -6.8
7      -6.7
8      -6.7

```

```

[14]: to_be_moved_to__ = to_be_moved_to.copy()
      try:
          for i, directory in enumerate(to_be_moved_to):

              with open(str(directory+str('\\MD_log_.txt'))) as f:
                  lines = f.readlines()

                  affinities = []
                  for element in lines[-10:-1]:
                      affinities.append(element[12:18])

                  floats = [float(x) for x in affinities]

                  to_be_moved_to__[i] = pd.DataFrame(data=floats, columns=[str(directory.
↪split("\\")[1])])
      except:
          print("Error: "+str(i)+' '+str(directory))

```

```

[15]: to_be_moved_to__[0]

```

```

[15]: 1_lig1_
0      -7.8
1      -7.1
2      -7.0
3      -7.0
4      -6.8
5      -6.8
6      -6.8
7      -6.7
8      -6.7

```

```

[16]: concat = pd.concat(to_be_moved_to__, axis=1)

```

```

[17]: concat

```

```

[17]: 1_lig1_  2_lig2_  3_lig3_  4_lig4_  5_lig5_  6_lig6_  7_lig7_  8_lig8_  \
0      -7.8    -7.6    -8.4    -8.2    -8.1    -9.4    -9.0    -7.4
1      -7.1    -7.4    -8.4    -8.1    -7.6    -8.7    -8.6    -7.4
2      -7.0    -7.3    -8.3    -8.1    -7.5    -8.4    -8.5    -7.1
3      -7.0    -7.2    -8.3    -8.1    -7.2    -8.0    -8.4    -7.1

```

|   |      |      |      |      |      |      |      |      |
|---|------|------|------|------|------|------|------|------|
| 4 | -6.8 | -7.2 | -8.2 | -8.0 | -7.2 | -7.9 | -8.2 | -6.9 |
| 5 | -6.8 | -7.0 | -8.2 | -7.9 | -7.1 | -7.9 | -8.1 | -6.8 |
| 6 | -6.8 | -6.9 | -7.8 | -7.9 | -7.1 | -7.9 | -7.9 | -6.8 |
| 7 | -6.7 | -6.8 | -7.7 | -7.7 | -7.1 | -7.7 | -7.9 | -6.7 |
| 8 | -6.7 | -6.8 | -7.7 | -7.7 | -7.0 | -7.7 | -7.9 | -6.7 |

|   | 9_lig9_ | 10_lig10_ | ... | 328_lig328_ | 329_lig329_ | 330_lig330_ | \ |
|---|---------|-----------|-----|-------------|-------------|-------------|---|
| 0 | -8.0    | -8.3      | ... | -7.8        | -7.7        | -9.0        |   |
| 1 | -8.0    | -8.0      | ... | -7.8        | -7.5        | -8.9        |   |
| 2 | -7.3    | -7.7      | ... | -7.7        | -7.4        | -8.9        |   |
| 3 | -7.1    | -7.4      | ... | -7.5        | -7.3        | -8.4        |   |
| 4 | -7.1    | -7.4      | ... | -7.5        | -7.2        | -8.1        |   |
| 5 | -6.9    | -7.3      | ... | -7.3        | -7.2        | -8.0        |   |
| 6 | -6.8    | -7.1      | ... | -7.3        | -7.0        | -8.0        |   |
| 7 | -6.8    | -7.0      | ... | -7.3        | -6.9        | -8.0        |   |
| 8 | -6.8    | -7.0      | ... | -7.2        | -6.9        | -7.9        |   |

|   | 331_lig331_ | 332_lig332_ | 333_lig333_ | 334_lig334_ | 335_lig335_ | \ |
|---|-------------|-------------|-------------|-------------|-------------|---|
| 0 | -8.9        | -8.8        | -8.7        | -9.9        | -7.2        |   |
| 1 | -8.8        | -8.5        | -8.2        | -9.0        | -7.2        |   |
| 2 | -8.7        | -8.4        | -8.1        | -9.0        | -7.0        |   |
| 3 | -8.5        | -8.4        | -7.9        | -8.9        | -6.8        |   |
| 4 | -8.4        | -8.3        | -7.9        | -8.5        | -6.6        |   |
| 5 | -7.9        | -8.3        | -7.6        | -8.4        | -6.6        |   |
| 6 | -7.9        | -8.2        | -7.6        | -8.4        | -6.5        |   |
| 7 | -7.9        | -8.1        | -7.6        | -8.3        | -6.5        |   |
| 8 | -7.9        | -8.0        | -7.5        | -8.1        | -6.5        |   |

|   | 336_lig336_ | 337_lig337_ |
|---|-------------|-------------|
| 0 | -8.5        | -9.4        |
| 1 | -7.8        | -9.4        |
| 2 | -7.8        | -8.8        |
| 3 | -7.6        | -8.8        |
| 4 | -7.6        | -8.7        |
| 5 | -7.3        | -8.5        |
| 6 | -7.3        | -8.2        |
| 7 | -7.2        | -8.2        |
| 8 | -7.1        | -8.2        |

[9 rows x 337 columns]

```
[18]: concat.to_excel('docking_results_'+str(input("Name of protein domain...
↳"))+str('.xlsx'))
```

Name of protein domain...1SA0\_chain\_AB

```

#####
# FILE 50
#####
obabel
'100_lig100\_3D_structure_new_colchicine99_NN([C@H1]1CCC2=CC(OC)=C(OC)C(O
.pdb' -O 100_lig100\_100_lig100_.pdbqt
obabel
'101_lig101\_3D_structure_new_colchicine100_OCCN(CC=C)C(=O)N[C@@H1]1C2=CC
(.pdb' -O 101_lig101\_101_lig101_.pdbqt
obabel
'102_lig102\_3D_structure_new_colchicine101_OCCN(CC=C)C(=S)N[C@H1]1CCC2=C
C.pdb' -O 102_lig102\_102_lig102_.pdbqt
obabel
'103_lig103\_3D_structure_new_colchicine102_CNC(N(C)C)CN[C@H1]1CCC2=CC(OC
).pdb' -O 103_lig103\_103_lig103_.pdbqt
obabel
'104_lig104\_3D_structure_new_colchicine103_NC(N(CC)OC)N[C@H1]1CCC2=CC(OC
).pdb' -O 104_lig104\_104_lig104_.pdbqt
obabel
'105_lig105\_3D_structure_new_colchicine104_C1[C@H1](C2=CC(C(SC)=CC=C2C3=
C.pdb' -O 105_lig105\_105_lig105_.pdbqt
obabel
'106_lig106\_3D_structure_new_colchicine105_C1=2[C@H1](CCC3=CC(OC)=C(OC)C
(.pdb' -O 106_lig106\_106_lig106_.pdbqt
obabel
'107_lig107\_3D_structure_new_colchicine106_C1=2[C@H1](CCC3=CC(OC)=C(OC)C
(.pdb' -O 107_lig107\_107_lig107_.pdbqt
obabel
'108_lig108\_3D_structure_new_colchicine107_NC(=O)N[C@@H1]C1=C2C(C(NC)=CC
=.pdb' -O 108_lig108\_108_lig108_.pdbqt
obabel
'109_lig109\_3D_structure_new_colchicine108_CC(C)NC(=O)N1[C@@H1]C2=CC(C(N
C.pdb' -O 109_lig109\_109_lig109_.pdbqt
obabel
'10_lig10\_3D_structure_new_colchicine9_C1N(C(=S)N[C@@H1]2C3=CC(C(NC)=.pd
b' -O 10_lig10\_10_lig10_.pdbqt
obabel
'110_lig110\_3D_structure_new_colchicine109_CC(N)(CCO)[C@H1]1CCC2=CC(OC)=
C.pdb' -O 110_lig110\_110_lig110_.pdbqt
obabel
'111_lig111\_3D_structure_new_colchicine110_CC(N)(CCO)[C@H1]1CCC2=CC(OC)=
C.pdb' -O 111_lig111\_111_lig111_.pdbqt
obabel
'112_lig112\_3D_structure_new_colchicine111_C1[C@H1](NC(C)=O)C2=CC(C(NC)=
C.pdb' -O 112_lig112\_112_lig112_.pdbqt
obabel
'113_lig113\_3D_structure_new_colchicine112_C1[C@H1](NC(C)=O)C2=CC(C(SC)=
C.pdb' -O 113_lig113\_113_lig113_.pdbqt
obabel
'114_lig114\_3D_structure_new_colchicine113_C=C(N[C@H1]1CCC2=C(C(OC)=C(OC
).pdb' -O 114_lig114\_114_lig114_.pdbqt
obabel
'115_lig115\_3D_structure_new_colchicine114_CC(C)N(C(C)C)C(=O)N[C@@H1]C1=
C.pdb' -O 115_lig115\_115_lig115_.pdbqt

```

```

obabel
'116_lig116\3D_structure_new_colchicine115_C1C(C)NC1N[C@H1]2CCC3=CC(OC)=
C.pdb' -O 116_lig116\116_lig116_.pdbqt
obabel
'117_lig117\3D_structure_new_colchicine116_O=C(N[C@H1]1CCC2=CC(OC)=C(OC)
C.pdb' -O 117_lig117\117_lig117_.pdbqt
obabel
'118_lig118\3D_structure_new_colchicine117_O=C(N[C@H1]1CCC2=CC(OC)=C(OC)
C.pdb' -O 118_lig118\118_lig118_.pdbqt
obabel
'119_lig119\3D_structure_new_colchicine118_COC1=C2C3=CC=C(NC)C(=O)C=C3[C
@.pdb' -O 119_lig119\119_lig119_.pdbqt
obabel
'11_lig11\3D_structure_new_colchicine10_C1=2[C@H1](CCC3=CC(OC)=C(OC)C(.p
db' -O 11_lig11\11_lig11_.pdbqt
obabel
'120_lig120\3D_structure_new_colchicine119_COC=CC1=CC=C(NC)C(=O)C=C1[C@@
H.pdb' -O 120_lig120\120_lig120_.pdbqt
obabel
'121_lig121\3D_structure_new_colchicine120_N=1C(=CN(N=1)[C@H1]2CCC3=CC(O
C.pdb' -O 121_lig121\121_lig121_.pdbqt
obabel
'122_lig122\3D_structure_new_colchicine121_C1=2[C@H1]CCC3=CC(OC)=C(OC)C(
O.pdb' -O 122_lig122\122_lig122_.pdbqt
obabel
'123_lig123\3D_structure_new_colchicine122_N1([C@H1]2CCC3=C(C(OC)=C(OC)C
(.pdb' -O 123_lig123\123_lig123_.pdbqt
obabel
'124_lig124\3D_structure_new_colchicine123_N1([C@H1]2CCC3=C(C(OC)=C(OC)C
(.pdb' -O 124_lig124\124_lig124_.pdbqt
obabel
'125_lig125\3D_structure_new_colchicine124_N1C(OC)=C(C=C1)N[C@H1]2CCC3=C
(.pdb' -O 125_lig125\125_lig125_.pdbqt
obabel
'126_lig126\3D_structure_new_colchicine125_N(C(C)C)(C(C)C)C(=O)N1[C@H1]C
C.pdb' -O 126_lig126\126_lig126_.pdbqt
obabel
'127_lig127\3D_structure_new_colchicine126_N(CCCC)CC1=CN(N=N1)[C@H1]2CCC
3.pdb' -O 127_lig127\127_lig127_.pdbqt
obabel
'128_lig128\3D_structure_new_colchicine127_NC(=S)N1[C@@H1]C2=CC(C(NC)=CC
=.pdb' -O 128_lig128\128_lig128_.pdbqt
obabel
'129_lig129\3D_structure_new_colchicine128_C=C(CN[C@H1]1CCC2=CC(OC)=C(OC)
).pdb' -O 129_lig129\129_lig129_.pdbqt
obabel
'12_lig12\3D_structure_new_colchicine11_C[C@H1](CCC1=CC(OC)=C(OC)C(OC(.p
db' -O 12_lig12\12_lig12_.pdbqt
obabel
'130_lig130\3D_structure_new_colchicine129_C1=C(N=NN1[C@H1]2CCC3=CC(OC)=
C.pdb' -O 130_lig130\130_lig130_.pdbqt
obabel
'131_lig131\3D_structure_new_colchicine130_C=CC=C(NC(=O)N[C@H1]1CCC2=CC(
O.pdb' -O 131_lig131\131_lig131_.pdbqt

```

```

obabel
'132_lig132\3D_structure_new_colchicine131_C[C@H1] (CCC1=CC (OC) =C (OC) C (OC
.pdb' -O 132_lig132\132_lig132_.pdbqt
obabel
'133_lig133\3D_structure_new_colchicine132_COCC (CN[C@@H1]1C=2C (C3=C (C (OC
).pdb' -O 133_lig133\133_lig133_.pdbqt
obabel
'134_lig134\3D_structure_new_colchicine133_NC1=NN=NN1 [C@@H1]2C=3C (C4=C (C
.pdb' -O 134_lig134\134_lig134_.pdbqt
obabel
'135_lig135\3D_structure_new_colchicine134_OCCN (CCO) C (=S) N1 [C@@H1] C2=CC (
C.pdb' -O 135_lig135\135_lig135_.pdbqt
obabel
'136_lig136\3D_structure_new_colchicine135_NC (C (OCC) =C) N [C@H1]1CCC2=CC (O
C.pdb' -O 136_lig136\136_lig136_.pdbqt
obabel
'137_lig137\3D_structure_new_colchicine136_N ([C@H1]1CCC2=CC (OC) =C (OC) C (O
C.pdb' -O 137_lig137\137_lig137_.pdbqt
obabel
'138_lig138\3D_structure_new_colchicine137_NC (CCC) N [C@@H1]1C2=CC (C (NC) =C
C.pdb' -O 138_lig138\138_lig138_.pdbqt
obabel
'139_lig139\3D_structure_new_colchicine138_N ([C@H1]1CCC2=CC (OC) =C (OC) C (O
C.pdb' -O 139_lig139\139_lig139_.pdbqt
obabel
'13_lig13\3D_structure_new_colchicine12_COC1=C2C3=CC=C (NC) C (=O) C=C3 [C@.p
db' -O 13_lig13\13_lig13_.pdbqt
obabel
'140_lig140\3D_structure_new_colchicine139_N ([C@H1]1CCC2=CC (OC) =C (OC) C (O
C.pdb' -O 140_lig140\140_lig140_.pdbqt
obabel
'141_lig141\3D_structure_new_colchicine140_C1=2 [C@H1] (CCC3=C (C (OC) =C (OC)
C.pdb' -O 141_lig141\141_lig141_.pdbqt
obabel
'142_lig142\3D_structure_new_colchicine141_N (C) C=1C (=O) C=C2 [C@H1] (CCC3=C
.pdb' -O 142_lig142\142_lig142_.pdbqt
obabel
'143_lig143\3D_structure_new_colchicine142_N (CCCC) CNCC1=CN (N=N1) [C@H1]2C
C.pdb' -O 143_lig143\143_lig143_.pdbqt
obabel
'144_lig144\3D_structure_new_colchicine143_N (C) C=1C (=O) C=C2 [C@H1] (CCC3=C
.pdb' -O 144_lig144\144_lig144_.pdbqt
obabel '145_lig145\3D_LtvuU3.pdb' -O 145_lig145\145_lig145_.pdbqt
obabel
'146_lig146\3D_structure_new_colchicine145_N1=CC=C (C=C1) C (NCC=2N=NN (C=2)
.pdb' -O 146_lig146\146_lig146_.pdbqt
obabel
'147_lig147\3D_structure_new_colchicine146_OCC (C) =C1C ([C@H1] (CCC2=CC (OC)
=.pdb' -O 147_lig147\147_lig147_.pdbqt
obabel
'148_lig148\3D_structure_new_colchicine147_N1=CC=C (C=C1) C (NCC=2N=NN (C=2)
.pdb' -O 148_lig148\148_lig148_.pdbqt
obabel '149_lig149\3D_bJov87.pdb' -O 149_lig149\149_lig149_.pdbqt

```

obabel  
'14\_lig14\3D\_structure\_new\_colchicine13\_COC1=C2C3=CC=C(NC)C(=O)C=C3[C@.pdb' -O 14\_lig14\14\_lig14\_.pdbqt  
obabel  
'150\_lig150\3D\_structure\_new\_colchicine149\_CC(C)(C)OC(=O)NCCCNCC1=CN(N=N1.pdb' -O 150\_lig150\150\_lig150\_.pdbqt  
obabel  
'151\_lig151\3D\_structure\_new\_colchicine150\_COC1=C2C3=CC=C(SC)C(=O)C=C3[C@.pdb' -O 151\_lig151\151\_lig151\_.pdbqt  
obabel  
'152\_lig152\3D\_structure\_new\_colchicine151\_COC1=C2C3=CC=C(NC)C(=O)C=C3[C@.pdb' -O 152\_lig152\152\_lig152\_.pdbqt  
obabel  
'153\_lig153\3D\_structure\_new\_colchicine152\_C=C(CO)CN[C@H1]1CCC2=CC(OC)=C(.pdb' -O 153\_lig153\153\_lig153\_.pdbqt  
obabel  
'154\_lig154\3D\_structure\_new\_colchicine153\_CC(C)CN[C@H1]1CCC2=CC(OC)=C(OC.pdb' -O 154\_lig154\154\_lig154\_.pdbqt  
obabel  
'155\_lig155\3D\_structure\_new\_colchicine154\_CC(C)CCN[C@H1]1CCC2=CC(OC)=C(O.pdb' -O 155\_lig155\155\_lig155\_.pdbqt  
obabel  
'156\_lig156\3D\_structure\_new\_colchicine155\_CC(C)CCN[C@H1]1CCC2=CC(OC)=C(O.pdb' -O 156\_lig156\156\_lig156\_.pdbqt  
obabel  
'157\_lig157\3D\_structure\_new\_colchicine156\_N=1NC=1[C@@H1]2C3=CC(C(NC)=CC=.pdb' -O 157\_lig157\157\_lig157\_.pdbqt  
obabel  
'158\_lig158\3D\_structure\_new\_colchicine157\_COC1=C2C3=CC=C(NC)C(=O)C=C3[C@.pdb' -O 158\_lig158\158\_lig158\_.pdbqt  
obabel  
'159\_lig159\3D\_structure\_new\_colchicine158\_COC1=C(OC)C(OC)=CC=2CC[C@@H1](.pdb' -O 159\_lig159\159\_lig159\_.pdbqt  
obabel  
'15\_lig15\3D\_structure\_new\_colchicine14\_CC(=O)N[C@H1]1CCC2=CC(OC)=C(OC.pdb' -O 15\_lig15\15\_lig15\_.pdbqt  
obabel  
'160\_lig160\3D\_structure\_new\_colchicine159\_C12=CC(C(NC)=CC=C1C3=C(C=C(OC).pdb' -O 160\_lig160\160\_lig160\_.pdbqt  
obabel  
'161\_lig161\3D\_structure\_new\_colchicine160\_O=CC1=CN=NN1[C@H1]2CCC3=CC(OC).pdb' -O 161\_lig161\161\_lig161\_.pdbqt  
obabel  
'162\_lig162\3D\_structure\_new\_colchicine161\_C1=CN=CC=C1CN[C@H1]2CCC3=CC(OC.pdb' -O 162\_lig162\162\_lig162\_.pdbqt  
obabel  
'163\_lig163\3D\_structure\_new\_colchicine162\_C1=CN=CC=C1CN[C@H1]2CCC3=CC(OC.pdb' -O 163\_lig163\163\_lig163\_.pdbqt  
obabel  
'164\_lig164\3D\_structure\_new\_colchicine163\_C=C1N=CC(C)N1CN[C@H1]2CCC3=C(C.pdb' -O 164\_lig164\164\_lig164\_.pdbqt  
obabel  
'165\_lig165\3D\_structure\_new\_colchicine164\_CNCC(C)OC(=O)N[C@H1]1CCC2=C(C(.pdb' -O 165\_lig165\165\_lig165\_.pdbqt

```

obabel
'166_lig166\3D_structure_new_colchicine165_C=CC=C(CCN[C@H1]1CCC2=CC(OC)=
C.pdb' -O 166_lig166\166_lig166_.pdbqt
obabel
'167_lig167\3D_structure_new_colchicine166_C1COC1(OC2=CC=C3C4=C(OC)C(OC)
=.pdb' -O 167_lig167\167_lig167_.pdbqt
obabel
'168_lig168\3D_structure_new_colchicine167_O=C(OC1=C2C(CC[C@H1](NC(=O)C)
C.pdb' -O 168_lig168\168_lig168_.pdbqt
obabel
'169_lig169\3D_structure_new_colchicine168_O=C1C=CC=C2C([C@H1](CCC3=CC(O
C.pdb' -O 169_lig169\169_lig169_.pdbqt
obabel
'16_lig16\3D_structure_new_colchicine15_C1=2C(=O)C(=C3C=C1C4=C(CC[C@@H.p
db' -O 16_lig16\16_lig16_.pdbqt
obabel
'170_lig170\3D_structure_new_colchicine169_C1=CC=C(C=C1)CN[C@H1]2CCC3=CC
(.pdb' -O 170_lig170\170_lig170_.pdbqt
obabel
'171_lig171\3D_structure_new_colchicine170_CC=CCCN[C@H1]1CCC2=CC(OC)=C(
O.pdb' -O 171_lig171\171_lig171_.pdbqt
obabel
'172_lig172\3D_structure_new_colchicine171_OC1=C(C=CC=C1)CN2[C@H1]CCC3=C
C.pdb' -O 172_lig172\172_lig172_.pdbqt
obabel
'173_lig173\3D_structure_new_colchicine172_COC1=C2C3=CC=C(NC)C(=O)C=C3[C
@.pdb' -O 173_lig173\173_lig173_.pdbqt
obabel
'174_lig174\3D_structure_new_colchicine173_COC1=CC=2CC[C@@H1](C=3C(C=2C(
=.pdb' -O 174_lig174\174_lig174_.pdbqt
obabel
'175_lig175\3D_structure_new_colchicine174_CSC1=CC=C2C(=CC1=O)[C@H1](CCC
3.pdb' -O 175_lig175\175_lig175_.pdbqt
obabel
'176_lig176\3D_structure_new_colchicine175_C1=C2[C@H1](CCC3=C(C(OC)=C(C(
=.pdb' -O 176_lig176\176_lig176_.pdbqt
obabel
'177_lig177\3D_structure_new_colchicine176_CC(=O)OC1=CC=C2C3=C(C(OC)=C(C
=.pdb' -O 177_lig177\177_lig177_.pdbqt
obabel
'178_lig178\3D_structure_new_colchicine177_CC(=O)OC=1C(=O)C=C2C(=CC=1)C3
=.pdb' -O 178_lig178\178_lig178_.pdbqt
obabel
'179_lig179\3D_structure_new_colchicine178_CC(=O)OC1=CC=C2C3=C(C(OC)=C(C
=.pdb' -O 179_lig179\179_lig179_.pdbqt
obabel
'17_lig17\3D_structure_new_colchicine16_CC(=O)OC1=CC=C2C3=C(C(OC)=C(C(=
db' -O 17_lig17\17_lig17_.pdbqt
obabel
'180_lig180\3D_structure_new_colchicine179_CCC(=O)OC1=CC=C2C3=C(C(OC)=C(
C.pdb' -O 180_lig180\180_lig180_.pdbqt
obabel
'181_lig181\3D_structure_new_colchicine180_CCC(=O)N[C@H1]1CCC2=CC(=C(OC)
C.pdb' -O 181_lig181\181_lig181_.pdbqt

```

obabel  
'182\_lig182\3D\_structure\_new\_colchicine181\_CC(C)C(OC1=CC=C2C3=C(CC[C@@H1]  
].pdb' -O 182\_lig182\182\_lig182\_.pdbqt  
obabel  
'183\_lig183\3D\_structure\_new\_colchicine182\_CC(C)C(OC1=CC=C2C3=C(CC[C@@H1]  
].pdb' -O 183\_lig183\183\_lig183\_.pdbqt  
obabel  
'184\_lig184\3D\_structure\_new\_colchicine183\_CC(C)C(=O)OC1=CC=C2C3=C(C(OC)  
=.pdb' -O 184\_lig184\184\_lig184\_.pdbqt  
obabel  
'185\_lig185\3D\_structure\_new\_colchicine184\_CC(C)C(OC1=CC=C2C3=C(C=C(OC)C  
(.pdb' -O 185\_lig185\185\_lig185\_.pdbqt  
obabel  
'186\_lig186\3D\_structure\_new\_colchicine185\_CC(=O)OCC1=CN(N=N1)[C@H1]2CCC  
3.pdb' -O 186\_lig186\186\_lig186\_.pdbqt  
obabel  
'187\_lig187\3D\_structure\_new\_colchicine186\_C1=C(C2=C(OC)C(OC)=C1OC(=O)CC  
C.pdb' -O 187\_lig187\187\_lig187\_.pdbqt  
obabel  
'188\_lig188\3D\_structure\_new\_colchicine187\_CC(=O)N[C@H1]1CCC2=CC(OC)=C(O  
C.pdb' -O 188\_lig188\188\_lig188\_.pdbqt  
obabel  
'189\_lig189\3D\_structure\_new\_colchicine188\_O=C(C)N[C@H1]1CCC2=CC(=C(OC)C  
(.pdb' -O 189\_lig189\189\_lig189\_.pdbqt  
obabel  
'18\_lig18\3D\_structure\_new\_colchicine17\_CC(=O)OC1=CC=C2C3=C(C(OC)=C(C=.p  
db' -O 18\_lig18\18\_lig18\_.pdbqt  
obabel  
'190\_lig190\3D\_structure\_new\_colchicine189\_C=12C(=O)C(=CC=C3C=1[C@H1](CC  
C.pdb' -O 190\_lig190\190\_lig190\_.pdbqt  
obabel  
'191\_lig191\3D\_structure\_new\_colchicine190\_CCC(=O)N[C@H1]1CCC2=C(C(OC)=C  
(.pdb' -O 191\_lig191\191\_lig191\_.pdbqt  
obabel  
'192\_lig192\3D\_structure\_new\_colchicine191\_CCC(=O)N[C@H1]1CCC2=CC(OC)=C(  
C.pdb' -O 192\_lig192\192\_lig192\_.pdbqt  
obabel  
'193\_lig193\3D\_structure\_new\_colchicine192\_CC=1C(=CC(C(=CC=1)SC)=O)[C@H1  
].pdb' -O 193\_lig193\193\_lig193\_.pdbqt  
obabel  
'194\_lig194\3D\_structure\_new\_colchicine193\_CC(C)COCCN[C@H1]1CCC2=CC(OC)=  
C.pdb' -O 194\_lig194\194\_lig194\_.pdbqt  
obabel  
'195\_lig195\3D\_structure\_new\_colchicine194\_CC(C)CCN[C@H1]1CCC2=C(C3=CC=C  
(.pdb' -O 195\_lig195\195\_lig195\_.pdbqt  
obabel  
'196\_lig196\3D\_structure\_new\_colchicine195\_CC(C)CCN[C@H1]1CCC2=C(C3=CC=C  
(.pdb' -O 196\_lig196\196\_lig196\_.pdbqt  
obabel  
'197\_lig197\3D\_structure\_new\_colchicine196\_C1=C(OC)C(=C(OC)C2=C1CC[C@H1]  
(.pdb' -O 197\_lig197\197\_lig197\_.pdbqt  
obabel  
'198\_lig198\3D\_structure\_new\_colchicine197\_O=C(C)N[C@H1]1CCC2=CC(OC)=C(C  
(.pdb' -O 198\_lig198\198\_lig198\_.pdbqt



```

obabel
'199_lig199\3D_structure_new_colchicine198_O=C(N(C)C)NC1=CC=C2C3=C(OC)C(
=.pdb' -O 199_lig199\199_lig199_.pdbqt
obabel
'19_lig19\3D_structure_new_colchicine18_CC(=O)OC1=CC=C2C3=C(C(OC)=C(C=.p
db' -O 19_lig19\19_lig19_.pdbqt
obabel
'1_lig1\3D_structure_new_colchicine0_COC1=C2C3=CC=C(NC)C(=O)C=C3[C@.pdb'
-O 1_lig1\1_lig1_.pdbqt
obabel
'200_lig200\3D_structure_new_colchicine199_O=C(N)N[C@H1]1CCC2=CC(OC)=C(C
(.pdb' -O 200_lig200\200_lig200_.pdbqt
obabel
'201_lig201\3D_structure_new_colchicine200_O=C(C)N[C@H1]1CCC2=CC(OC)=C(C
(.pdb' -O 201_lig201\201_lig201_.pdbqt
obabel
'202_lig202\3D_structure_new_colchicine201_CC(=O)N1[C@H1]CCC2=CC(OC)=C(O
C.pdb' -O 202_lig202\202_lig202_.pdbqt
obabel
'203_lig203\3D_structure_new_colchicine202_COC1=C2C3=CC=C(NC)C(=O)C=C3[C
@.pdb' -O 203_lig203\203_lig203_.pdbqt
obabel
'204_lig204\3D_structure_new_colchicine203_C1[C@@H1](C2=CC(=O)C(NC)=CC=C
2.pdb' -O 204_lig204\204_lig204_.pdbqt
obabel
'205_lig205\3D_structure_new_colchicine204_CNC(C(C)O)N([C@H1]1CCC2=CC(=C
(.pdb' -O 205_lig205\205_lig205_.pdbqt
obabel
'206_lig206\3D_structure_new_colchicine205_CNC(C(C)O)N[C@@H1]1C=2C(C3=C(
C.pdb' -O 206_lig206\206_lig206_.pdbqt
obabel
'207_lig207\3D_structure_new_colchicine206_CNC(=S)N[C@@H1]1C2=CC(=O)C(NC
).pdb' -O 207_lig207\207_lig207_.pdbqt
obabel
'208_lig208\3D_structure_new_colchicine207_N([C@H1]1CCC2=C(C3=CC=C(C(C=C
1.pdb' -O 208_lig208\208_lig208_.pdbqt
obabel
'209_lig209\3D_structure_new_colchicine208_C12=CC(C(NC)=CC=C1C3=C(C=C(C(
O.pdb' -O 209_lig209\209_lig209_.pdbqt
obabel
'20_lig20\3D_structure_new_colchicine19_CC(C)C(OC1=CC=C2C3=C(CC[C@@H1].p
db' -O 20_lig20\20_lig20_.pdbqt
obabel
'210_lig210\3D_structure_new_colchicine209_COC1=C(OC)C(OC)=CC=2CC[C@@H1]
(.pdb' -O 210_lig210\210_lig210_.pdbqt
obabel
'211_lig211\3D_structure_new_colchicine210_COC1=C(OC)C(OC)=CC=2CC[C@@H1]
(.pdb' -O 211_lig211\211_lig211_.pdbqt
obabel
'212_lig212\3D_structure_new_colchicine211_CN(C(=S)N[C@@H1]1C2=CC(=O)C(N
C.pdb' -O 212_lig212\212_lig212_.pdbqt
obabel
'213_lig213\3D_structure_new_colchicine212_CC(C)(C)OC1=CN(N=N1)[C@H1]C2C
C.pdb' -O 213_lig213\213_lig213_.pdbqt

```

```

obabel
'214_lig214\3D_structure_new_colchicine213_CC(C)CCCCCN[C@@H1]1C2=CC(C(S
C.pdb' -O 214_lig214\214_lig214_.pdbqt
obabel
'215_lig215\3D_structure_new_colchicine214_CC(C)(C)C(=O)N[C@@H1]1C=2C(C3
=.pdb' -O 215_lig215\215_lig215_.pdbqt
obabel
'216_lig216\3D_structure_new_colchicine215_OC(CCC(C)C)OCC1=CN(N=N1)[C@H1
].pdb' -O 216_lig216\216_lig216_.pdbqt
obabel
'217_lig217\3D_structure_new_colchicine216_O=C(NCC1=CC=CC=C1C1)N[C@H1]2C
C.pdb' -O 217_lig217\217_lig217_.pdbqt
obabel
'218_lig218\3D_structure_new_colchicine217_N([C@H1]1CCC2=C(C(OC)=C(OC)C(
O.pdb' -O 218_lig218\218_lig218_.pdbqt
obabel
'219_lig219\3D_structure_new_colchicine218_O=CC=CCC=CN(CN([C@H1]1CCC2=CC
(.pdb' -O 219_lig219\219_lig219_.pdbqt
obabel
'21_lig21\3D_structure_new_colchicine20_CC(=O)N[C@@H1]1C2=CC(C(SC)=CC=.p
db' -O 21_lig21\21_lig21_.pdbqt
obabel
'220_lig220\3D_structure_new_colchicine219_OC1=C(C=CC=C1)C=2N=NN(C=2)[C@
H.pdb' -O 220_lig220\220_lig220_.pdbqt
obabel
'221_lig221\3D_structure_new_colchicine220_OC1=C(C=CC=C1)C=2N=NN(C=2)[C@
H.pdb' -O 221_lig221\221_lig221_.pdbqt
obabel
'222_lig222\3D_structure_new_colchicine221_C1[C@@H1](C2=CC(=O)C(NC)=CC=C
2.pdb' -O 222_lig222\222_lig222_.pdbqt
obabel
'223_lig223\3D_structure_new_colchicine222_O=C(OC(C)(C)C)N[C@H1]1CCC2=C(
C.pdb' -O 223_lig223\223_lig223_.pdbqt
obabel
'224_lig224\3D_structure_new_colchicine223_O=C(OCC)CN(OCC)C[C@@H1]1C2=CC
(.pdb' -O 224_lig224\224_lig224_.pdbqt
obabel
'225_lig225\3D_structure_new_colchicine224_O=C(C)OC1=CN(N=N1)[C@H1]2CCC3
=.pdb' -O 225_lig225\225_lig225_.pdbqt
obabel
'226_lig226\3D_structure_new_colchicine225_O=C(OCC)CN(CCC)C[C@H1]1CCC2=C
C.pdb' -O 226_lig226\226_lig226_.pdbqt
obabel
'227_lig227\3D_structure_new_colchicine226_O=C(C(C1)C1)NC(=O)N[C@H1]1CCC
2.pdb' -O 227_lig227\227_lig227_.pdbqt
obabel
'228_lig228\3D_structure_new_colchicine227_O=C(C(C1)C1)NC(=O)N[C@H1]1CCC
2.pdb' -O 228_lig228\228_lig228_.pdbqt
obabel
'229_lig229\3D_structure_new_colchicine228_O=C(OCCC)OCC1=CN(N=N1)[C@H1]2
C.pdb' -O 229_lig229\229_lig229_.pdbqt
obabel
'22_lig22\3D_structure_new_colchicine21_O=C(OC)OC1=CC=C2C3=C(C(OC)=C(C.p
db' -O 22_lig22\22_lig22_.pdbqt

```

```

obabel
'230_lig230\_3D_structure_new_colchicine229_O=C(OCCC)OCC1=CN(N=N1)[C@H]2
C.pdb' -O 230_lig230\_230_lig230_.pdbqt
obabel
'231_lig231\_3D_structure_new_colchicine230_O=C(OCC=C)NCC1=CN(N=N1)[C@H]
2.pdb' -O 231_lig231\_231_lig231_.pdbqt
obabel
'232_lig232\_3D_structure_new_colchicine231_O=C(C(C1)C1)NCC1=CN(N=N1)[C@H
1.pdb' -O 232_lig232\_232_lig232_.pdbqt
obabel
'233_lig233\_3D_structure_new_colchicine232_O=C(C(C1)C1)NCC1=CN(N=N1)[C@H
1.pdb' -O 233_lig233\_233_lig233_.pdbqt
obabel
'234_lig234\_3D_structure_new_colchicine233_O=C(C)N[C@@H]1CC(C2=C(C(OC)=
C.pdb' -O 234_lig234\_234_lig234_.pdbqt
obabel
'235_lig235\_3D_structure_new_colchicine234_O=C(C(C1)C1)NC(=O)N[C@H]1CCC
2.pdb' -O 235_lig235\_235_lig235_.pdbqt
obabel
'236_lig236\_3D_structure_new_colchicine235_O=C(OCC)C1=CN(N=N1)[C@H]2CCC
3.pdb' -O 236_lig236\_236_lig236_.pdbqt
obabel
'237_lig237\_3D_structure_new_colchicine236_O=C(O)CN(CCO)C(=O)N[C@H]1CCC
2.pdb' -O 237_lig237\_237_lig237_.pdbqt
obabel
'238_lig238\_3D_structure_new_colchicine237_CC(C)OC(NCC1=CN(N=N1)[C@H]2C
C.pdb' -O 238_lig238\_238_lig238_.pdbqt
obabel
'239_lig239\_3D_structure_new_colchicine238_COC(NCCCOCC1=CN(N=N1)[C@H]2C
C.pdb' -O 239_lig239\_239_lig239_.pdbqt
obabel
'23_lig23\_3D_structure_new_colchicine22_O=C(C)N[C@H]1CCC2=CC(=C(OC)C(.p
db' -O 23_lig23\_23_lig23_.pdbqt
obabel '240_lig240\_3D_zEatBw.pdb' -O 240_lig240\_240_lig240_.pdbqt
obabel
'241_lig241\_3D_structure_new_colchicine240_C1=CN=CC=C1C2=CN(N=N2)[C@H]3
C.pdb' -O 241_lig241\_241_lig241_.pdbqt
obabel
'242_lig242\_3D_structure_new_colchicine241_COC=C(OC)C(OC)=CCCC[C@H](N1C
=.pdb' -O 242_lig242\_242_lig242_.pdbqt
obabel
'243_lig243\_3D_structure_new_colchicine242_COC1=C(OC)C=CC=2CC[C@@H](C3=
C.pdb' -O 243_lig243\_243_lig243_.pdbqt
obabel
'244_lig244\_3D_structure_new_colchicine243_CC(C)(O)C=CN([C@H]1CCC2=CC(O
C.pdb' -O 244_lig244\_244_lig244_.pdbqt
obabel
'245_lig245\_3D_structure_new_colchicine244_C=12C(=CC(C(NC)=CC=1)=O)[C@H]
1.pdb' -O 245_lig245\_245_lig245_.pdbqt
obabel
'246_lig246\_3D_structure_new_colchicine245_NC(=O)NCC1=CN(N=N1)[C@H]2CCC
3.pdb' -O 246_lig246\_246_lig246_.pdbqt

```

```

obabel
'247_lig247\3D_structure_new_colchicine246_C1=CC(OC)=CC=C1CN[C@H1]2CCC3=C
C.pdb' -O 247_lig247\247_lig247_.pdbqt
obabel
'248_lig248\3D_structure_new_colchicine247_N(C(C1=CC=CC=C1)=O)CCN[C@H1]2
C.pdb' -O 248_lig248\248_lig248_.pdbqt
obabel
'249_lig249\3D_structure_new_colchicine248_N=NC(=C(C(OCC)=O)N[C@H1]1CCC2
=.pdb' -O 249_lig249\249_lig249_.pdbqt
obabel
'24_lig24\3D_structure_new_colchicine23_CC(=O)OCC1=CN(N=N1)[C@H1]2CCC3.p
db' -O 24_lig24\24_lig24_.pdbqt
obabel
'250_lig250\3D_structure_new_colchicine249_CNC=1C(=O)C=C2[C@H1](CCC3=C(C
(.pdb' -O 250_lig250\250_lig250_.pdbqt
obabel
'251_lig251\3D_structure_new_colchicine250_NN(C=C(CNC(CCCCC1)=O)N=N)[C@H
1.pdb' -O 251_lig251\251_lig251_.pdbqt
obabel
'252_lig252\3D_structure_new_colchicine251_N=NC1=CN(N=N1)[C@H1]2CCC3=CC(
O.pdb' -O 252_lig252\252_lig252_.pdbqt
obabel
'253_lig253\3D_structure_new_colchicine252_CC(C)(C)OC(=O)NCCC(NCC=1N=NN(
C.pdb' -O 253_lig253\253_lig253_.pdbqt
obabel
'254_lig254\3D_structure_new_colchicine253_CC(C)(C)OCNCCC(=O)NCC1=CN(N=N
1.pdb' -O 254_lig254\254_lig254_.pdbqt
obabel
'255_lig255\3D_structure_new_colchicine254_C1(=CN(C(=O)OCC)N[C@@H1]2C=3C
(.pdb' -O 255_lig255\255_lig255_.pdbqt
obabel
'256_lig256\3D_structure_new_colchicine255_CC(C)(C)OCNCCC(=O)NCC1=CN(N=N
1.pdb' -O 256_lig256\256_lig256_.pdbqt
obabel
'257_lig257\3D_structure_new_colchicine256_CC(C)(C)OC(=O)NCCC(OCC=1N=NN(
C.pdb' -O 257_lig257\257_lig257_.pdbqt
obabel '258_lig258\3D_QxX7hq.pdb' -O 258_lig258\258_lig258_.pdbqt
obabel
'259_lig259\3D_structure_new_colchicine258_C=1N(N=NC=1C(OCC)=O)[C@H1]2CC
C.pdb' -O 259_lig259\259_lig259_.pdbqt
obabel
'25_lig25\3D_structure_new_colchicine24_CC(=O)OCC1=CN(N=N1)[C@H1]2CCC3.p
db' -O 25_lig25\25_lig25_.pdbqt
obabel
'260_lig260\3D_structure_new_colchicine259_O=CC=CN=NN[C@H1]1CCC2=C(C(OC)
=.pdb' -O 260_lig260\260_lig260_.pdbqt
obabel
'261_lig261\3D_structure_new_colchicine260_C1=CN=CC=C1C(NCC2=CN(N=N2)[C@
H.pdb' -O 261_lig261\261_lig261_.pdbqt
obabel
'262_lig262\3D_structure_new_colchicine261_N=NN([C@H1]1CCC2=C(C(OC)=C(OC
).pdb' -O 262_lig262\262_lig262_.pdbqt

```

```

obabel
'263_lig263\_3D_structure_new_colchicine262_CN(N([C@@H1]1C2=CC(=O)C(NC)=C
C.pdb' -O 263_lig263\_263_lig263_.pdbqt
obabel
'264_lig264\_3D_structure_new_colchicine263_CN(N([C@@H1]1C2=CC(=O)C(NC)=C
C.pdb' -O 264_lig264\_264_lig264_.pdbqt
obabel
'265_lig265\_3D_structure_new_colchicine264_O=C(CC)OCC1=CN(N=N1)[C@H1]2CC
C.pdb' -O 265_lig265\_265_lig265_.pdbqt
obabel
'266_lig266\_3D_structure_new_colchicine265_O=C(OC(C)(C)C)NCC=1N=NN(C=1)[
C.pdb' -O 266_lig266\_266_lig266_.pdbqt
obabel
'267_lig267\_3D_structure_new_colchicine266_O=C(C(C)C)NCN[C@H1]1CCC2=CC(O
C.pdb' -O 267_lig267\_267_lig267_.pdbqt
obabel
'268_lig268\_3D_structure_new_colchicine267_O=C(OCC)C=1N(N=NC=1C(=O)O2)[C
@.pdb' -O 268_lig268\_268_lig268_.pdbqt
obabel
'269_lig269\_3D_structure_new_colchicine268_CC(O)(C)CC(=O)OCC1=CN(N=N1)[C
@.pdb' -O 269_lig269\_269_lig269_.pdbqt
obabel
'26_lig26\_3D_structure_new_colchicine25_CC(=O)N[C@@H1]1C2=CC(C(NC)=CC=.p
db' -O 26_lig26\_26_lig26_.pdbqt
obabel
'270_lig270\_3D_structure_new_colchicine269_CC(C)COC(NCC1=CN(N=N1)[C@H1]C
2.pdb' -O 270_lig270\_270_lig270_.pdbqt
obabel
'271_lig271\_3D_structure_new_colchicine270_COCNCC1=CN(N=N1)[C@H1]2CCC3=C
C.pdb' -O 271_lig271\_271_lig271_.pdbqt
obabel
'272_lig272\_3D_structure_new_colchicine271_CC(C)(C)OC(NCC=1N=NN(C=1)[C@H
1.pdb' -O 272_lig272\_272_lig272_.pdbqt
obabel
'273_lig273\_3D_structure_new_colchicine272_N(C)C1=CC=C2C3=C(OC)C(OC)=C(O
C.pdb' -O 273_lig273\_273_lig273_.pdbqt
obabel
'274_lig274\_3D_structure_new_colchicine273_O=C(OCC)C1=C(C(OCC)=O)N=NN1[C
@.pdb' -O 274_lig274\_274_lig274_.pdbqt
obabel
'275_lig275\_3D_structure_new_colchicine274_N([C@H1]1CCC2=CC(OC)=C(OC)C(O
C.pdb' -O 275_lig275\_275_lig275_.pdbqt
obabel
'276_lig276\_3D_structure_new_colchicine275_CC(CC)N[C@H1]C1CC2=CC(OC)=C(O
C.pdb' -O 276_lig276\_276_lig276_.pdbqt
obabel
'277_lig277\_3D_structure_new_colchicine276_CC(CC)N[C@H1]C1CC2=CC(OC)=C(O
C.pdb' -O 277_lig277\_277_lig277_.pdbqt
obabel
'278_lig278\_3D_structure_new_colchicine277_COC1=C2C3=CC=C(NC)C(=O)C=C3[C
@.pdb' -O 278_lig278\_278_lig278_.pdbqt
obabel
'279_lig279\_3D_structure_new_colchicine278_COC1=C2C3=CC=C(NC)C(=O)C=C3[C
@.pdb' -O 279_lig279\_279_lig279_.pdbqt

```

```

obabel
'27_lig27\3D_structure_new_colchicine26_CC(=O)N[C@@H1]C1=C2C(C(NC)=CC=.p
db'-O 27_lig27\27_lig27_.pdbqt
obabel
'280_lig280\3D_structure_new_colchicine279_COC1=C2C3=CC=C(SC)C(=O)C=C3[C
@.pdb'-O 280_lig280\280_lig280_.pdbqt
obabel
'281_lig281\3D_structure_new_colchicine280_O(C1=C(OC)C=2C3=CC=C(SC)C(C=C
3.pdb'-O 281_lig281\281_lig281_.pdbqt
obabel
'282_lig282\3D_structure_new_colchicine281_C1=CN=CC=C1CN[C@H1]2CCC3=CC(O
C.pdb'-O 282_lig282\282_lig282_.pdbqt
obabel
'283_lig283\3D_structure_new_colchicine282_O=CC1=CN=NN1[C@H1]2CCC3=CC(OC
).pdb'-O 283_lig283\283_lig283_.pdbqt
obabel
'284_lig284\3D_structure_new_colchicine283_NC(CCN[C@H1]1CCC2=CC(OC)=C(OC
).pdb'-O 284_lig284\284_lig284_.pdbqt
obabel
'285_lig285\3D_structure_new_colchicine284_NC(N=C1C=CC2)=CC=C1C3=C(OC)C(
O.pdb'-O 285_lig285\285_lig285_.pdbqt
obabel
'286_lig286\3D_structure_new_colchicine285_C=CC1=C(NC)C(OC)=C(OC)C=C1CC[
C.pdb'-O 286_lig286\286_lig286_.pdbqt
obabel
'287_lig287\3D_structure_new_colchicine286_CC(N)(CCO)[C@H1]1CCC2=CC(OC)=
C.pdb'-O 287_lig287\287_lig287_.pdbqt
obabel
'288_lig288\3D_structure_new_colchicine287_N(NCCCCC1)[C@H1]1CCC2=CC(OC)=
C.pdb'-O 288_lig288\288_lig288_.pdbqt
obabel
'289_lig289\3D_structure_new_colchicine288_N(C1=CC=C(C=C1)C)CN[C@H1]2CCC
3.pdb'-O 289_lig289\289_lig289_.pdbqt
obabel
'28_lig28\3D_structure_new_colchicine27_COC1=C2C3=CC=C(NC)C(=O)C=C3[C@.p
db'-O 28_lig28\28_lig28_.pdbqt
obabel
'290_lig290\3D_structure_new_colchicine289_N(C1=CC=C(C=C1)C)CN[C@H1]2CCC
3.pdb'-O 290_lig290\290_lig290_.pdbqt
obabel
'291_lig291\3D_structure_new_colchicine290_CCN(CC)C(=O)N[C@H1]C1CC2=CC(O
C.pdb'-O 291_lig291\291_lig291_.pdbqt
obabel
'292_lig292\3D_structure_new_colchicine291_CCN(CC)C(=O)N1[C@H1]CCC2=CC(O
C.pdb'-O 292_lig292\292_lig292_.pdbqt
obabel
'293_lig293\3D_structure_new_colchicine292_CCN(CC)C(=O)N[C@H1]1CCC2=CC(O
C.pdb'-O 293_lig293\293_lig293_.pdbqt
obabel
'294_lig294\3D_structure_new_colchicine293_CC(C)COC1=C(OC)C(OC)=CC=2CC[C
@.pdb'-O 294_lig294\294_lig294_.pdbqt
obabel
'295_lig295\3D_structure_new_colchicine294_C=C(C)CN(CCO)C(=S)N[C@H1]1CCC
2.pdb'-O 295_lig295\295_lig295_.pdbqt

```

```

obabel
'296_lig296\3D_structure_new_colchicine295_CC(C)C(OC=C(C(OC)=CCCC[C@H1])(
N.pdb' -O 296_lig296\296_lig296_.pdbqt
obabel
'297_lig297\3D_structure_new_colchicine296_N([C@H1]1CCC2=CC(OC)=C(OC)C(O
C.pdb' -O 297_lig297\297_lig297_.pdbqt
obabel
'298_lig298\3D_structure_new_colchicine297_O=C(N[C@H1]1CCC2=CC(OC)=C(OC)
C.pdb' -O 298_lig298\298_lig298_.pdbqt
obabel
'299_lig299\3D_structure_new_colchicine298_O=C(N[C@@H1]1C2=CC(C(NC)=CC=C
2.pdb' -O 299_lig299\299_lig299_.pdbqt
obabel
'29_lig29\3D_structure_new_colchicine28_COC1=C2C3=CC=C(NC)C(=O)C=C3[C@.p
db' -O 29_lig29\29_lig29_.pdbqt
obabel
'2_lig2\3D_structure_new_colchicine1_COC1=C2C3=CC=C(NC)C(=O)C=C3[C@.pdb'
-O 2_lig2\2_lig2_.pdbqt
obabel
'300_lig300\3D_structure_new_colchicine299_N([C@H1]1CCC2=CC(OC)=C(OC)C(O
C.pdb' -O 300_lig300\300_lig300_.pdbqt
obabel
'301_lig301\3D_structure_new_colchicine300_O=C(N[C@H1]1CCC2=CC(OC)=C(OC)
C.pdb' -O 301_lig301\301_lig301_.pdbqt
obabel
'302_lig302\3D_structure_new_colchicine301_C1=CCC[C@H1](NC(=S)NC2=CC=C(C
=.pdb' -O 302_lig302\302_lig302_.pdbqt
obabel
'303_lig303\3D_structure_new_colchicine302_CNCC(O)(C)C1=CN(N=N1)[C@H1]2C
C.pdb' -O 303_lig303\303_lig303_.pdbqt
obabel
'304_lig304\3D_structure_new_colchicine303_N1([C@H1]2CCC3=C(C(OC)=C(OC)C
(.pdb' -O 304_lig304\304_lig304_.pdbqt
obabel
'305_lig305\3D_structure_new_colchicine304_N([C@H1]1CCC2=C(C(OC)=C(OC)C(
O.pdb' -O 305_lig305\305_lig305_.pdbqt
obabel
'306_lig306\3D_structure_new_colchicine305_C1=C(O)C(OC)=CC(CN[C@H1]2CCC3
=.pdb' -O 306_lig306\306_lig306_.pdbqt
obabel
'307_lig307\3D_structure_new_colchicine306_COCC(C)=C(C(OC)=CCCC[C@H1](NC
C.pdb' -O 307_lig307\307_lig307_.pdbqt
obabel
'308_lig308\3D_structure_new_colchicine307_C[C@H1](CCC1=CC(OC)=C(OC)C(OC
).pdb' -O 308_lig308\308_lig308_.pdbqt
obabel
'309_lig309\3D_structure_new_colchicine308_NC(=O)N1[C@@H1]C2=CC(C(NC)=CC
=.pdb' -O 309_lig309\309_lig309_.pdbqt
obabel
'30_lig30\3D_structure_new_colchicine29_COC1=C2C3=CC=C(NC)C(=O)C=C3[C@.p
db' -O 30_lig30\30_lig30_.pdbqt
obabel
'310_lig310\3D_structure_new_colchicine309_NN(CCO)[C@@H1]1C2=CC(C(NC)=CC
=.pdb' -O 310_lig310\310_lig310_.pdbqt

```

```

obabel
'311_lig311\3D_structure_new_colchicine310_C1=2[C@H1](CCC3=CC(OC)=C(OC)C
(.pdb' -O 311_lig311\311_lig311_.pdbqt
obabel
'312_lig312\3D_structure_new_colchicine311_NC(N=NCOCCC)C[C@H1]1C2=CC(C(N
C.pdb' -O 312_lig312\312_lig312_.pdbqt
obabel
'313_lig313\3D_structure_new_colchicine312_C1=2C(C3=C(OC)C(OC)=C(OC)C=C3
C.pdb' -O 313_lig313\313_lig313_.pdbqt
obabel
'314_lig314\3D_structure_new_colchicine313_C1=C(CN[C@H1]2CCC3=CC(OC)=C(O
C.pdb' -O 314_lig314\314_lig314_.pdbqt
obabel
'315_lig315\3D_structure_new_colchicine314_C1[C@H1](NC(NC2=CC=C(C=C2)F)=
O.pdb' -O 315_lig315\315_lig315_.pdbqt
obabel
'316_lig316\3D_structure_new_colchicine315_C1=CC(=CC=N1)CCN[C@@H1]2C3=CC
(.pdb' -O 316_lig316\316_lig316_.pdbqt
obabel
'317_lig317\3D_structure_new_colchicine316_C1=2[C@H1]CCC3=CC(OC)=C(OC)C(
O.pdb' -O 317_lig317\317_lig317_.pdbqt
obabel
'318_lig318\3D_structure_new_colchicine317_CC=CC1=C(C=C(OC)C(OC)=C1OC(OC
C.pdb' -O 318_lig318\318_lig318_.pdbqt
obabel
'319_lig319\3D_structure_new_colchicine318_O=C1C=C2[C@H1](CCC3=C(C(OC)=C
(.pdb' -O 319_lig319\319_lig319_.pdbqt
obabel
'31_lig31\3D_structure_new_colchicine30_COC1=C2C3=CC=C(NC)C(=O)C=C3[C@.p
db' -O 31_lig31\31_lig31_.pdbqt
obabel
'320_lig320\3D_structure_new_colchicine319_O=C1C=C2[C@H1](CCC3=C(C(OC)=C
(.pdb' -O 320_lig320\320_lig320_.pdbqt
obabel
'321_lig321\3D_structure_new_colchicine320_O=C1C=C2[C@H1](CCC3=C(C(OC)=C
(.pdb' -O 321_lig321\321_lig321_.pdbqt
obabel
'322_lig322\3D_structure_new_colchicine321_N1C=NN=NN1[C@H1]2CCC3=C(C(OC)
=.pdb' -O 322_lig322\322_lig322_.pdbqt
obabel
'323_lig323\3D_structure_new_colchicine322_CNC=1C(=O)C=C2[C@H1](CCC3=CC(
O.pdb' -O 323_lig323\323_lig323_.pdbqt
obabel
'324_lig324\3D_structure_new_colchicine323_N([C@H1]1CCC2=CC(OC)=C(OC)C(O
C.pdb' -O 324_lig324\324_lig324_.pdbqt
obabel
'325_lig325\3D_structure_new_colchicine324_C[C@H1](CCC1=CC(OC)=C(OC)C(OC
).pdb' -O 325_lig325\325_lig325_.pdbqt
obabel
'326_lig326\3D_structure_new_colchicine325_N([C@H1]1CCC2=C(C(OC)=C(OC)C(
O.pdb' -O 326_lig326\326_lig326_.pdbqt
obabel
'327_lig327\3D_structure_new_colchicine326_C=CC1=C(C(=O)OC=CC=C2C3=C(OC)
C.pdb' -O 327_lig327\327_lig327_.pdbqt

```



```

obabel
'328_lig328\3D_structure_new_colchicine327_C=C1C2=C(C=C(OC)C(OC)=C2OC(OC)C.pdb' -O 328_lig328\328_lig328_.pdbqt
obabel
'329_lig329\3D_structure_new_colchicine328_CC=CC(N[C@H1]1CCC2=C(C(OC)=C(O.pdb' -O 329_lig329\329_lig329_.pdbqt
obabel
'32_lig32\3D_structure_new_colchicine31_COC1=C(OC)C(OC)=CC=2CC[C@H1](N.pdb' -O 32_lig32\32_lig32_.pdbqt
obabel
'330_lig330\3D_structure_new_colchicine329_OC(=O)NCC1=CN(N=N1)[C@@H1]2C=3.pdb' -O 330_lig330\330_lig330_.pdbqt
obabel
'331_lig331\3D_structure_new_colchicine330_N(C)C=1C(=O)C=C2[C@H1](CCC3=C(.pdb' -O 331_lig331\331_lig331_.pdbqt
obabel
'332_lig332\3D_structure_new_colchicine331_O=C(C=C(C(O1)CCCCC1)CN=N)N[C@.pdb' -O 332_lig332\332_lig332_.pdbqt
obabel
'333_lig333\3D_structure_new_colchicine332_N([C@H1]1CCC2=C(C(OC)=C(OC)C(O.pdb' -O 333_lig333\333_lig333_.pdbqt
obabel
'334_lig334\3D_structure_new_colchicine333_O=C(C=C(C1)C=CN([C@H1]1CCC2=C(.pdb' -O 334_lig334\334_lig334_.pdbqt
obabel '335_lig335\3D_O4ZgW2.pdb' -O 335_lig335\335_lig335_.pdbqt
obabel '336_lig336\3D_L9ZpgB.pdb' -O 336_lig336\336_lig336_.pdbqt
obabel
'337_lig337\3D_structure_new_colchicine336_C12=C3C(C4=C(OC)C(OC)=C(OC)C=C.pdb' -O 337_lig337\337_lig337_.pdbqt
obabel
'33_lig33\3D_structure_new_colchicine32_CNC(NCCCC)=S[C@@H1]C1=CC(=O)C(.pdb' -O 33_lig33\33_lig33_.pdbqt
obabel
'34_lig34\3D_structure_new_colchicine33_CN(C(=S)N[C@@H1]1C2=CC(=O)C(NC.pdb' -O 34_lig34\34_lig34_.pdbqt
obabel
'35_lig35\3D_structure_new_colchicine34_CNC(C(C)C)N[C@@H1]1C=2C(C3=C(C.pdb' -O 35_lig35\35_lig35_.pdbqt
obabel
'36_lig36\3D_structure_new_colchicine35_COC1=C(OC)C(OC)=CC=2CC[C@@H1](.pdb' -O 36_lig36\36_lig36_.pdbqt
obabel
'37_lig37\3D_structure_new_colchicine36_COC1=C(OC)C(OC)=CC=2CC[C@@H1](.pdb' -O 37_lig37\37_lig37_.pdbqt
obabel
'38_lig38\3D_structure_new_colchicine37_CC(C)(C)COC1=CC=C2C3=C(OC)C(OC.pdb' -O 38_lig38\38_lig38_.pdbqt
obabel
'39_lig39\3D_structure_new_colchicine38_C1=2[C@H1]CCC3=CC(OC)=C(OC)C(O.pdb' -O 39_lig39\39_lig39_.pdbqt
obabel
'3_lig3\3D_structure_new_colchicine2_COC1=C2C3=CC=C(NC)C(=O)C=C3[C@.pdb' -O 3_lig3\3_lig3_.pdbqt

```

```

obabel
'40_lig40\3D_structure_new_colchicine39_OC(CCC(C)C)OCC1=CN(N=N1)[C@H1].p
db'-O 40_lig40\40_lig40_.pdbqt
obabel
'41_lig41\3D_structure_new_colchicine40_OC1=C(C=CC=C1)C=2N=NN(C=2)[C@H.p
db'-O 41_lig41\41_lig41_.pdbqt
obabel
'42_lig42\3D_structure_new_colchicine41_NC1=CN(N=N1)[C@H1]2CCC3=C(C(OC.p
db'-O 42_lig42\42_lig42_.pdbqt
obabel
'43_lig43\3D_structure_new_colchicine42_O=C(OCC)CN(CCO)N[C@H1]1CCC2=CC.p
db'-O 43_lig43\43_lig43_.pdbqt
obabel
'44_lig44\3D_structure_new_colchicine43_O=C(C1=C(C(OCC)=O)N(N=N1)[C@@H.p
db'-O 44_lig44\44_lig44_.pdbqt
obabel
'45_lig45\3D_structure_new_colchicine44_C1=2[C@H1](CCC3=CC(OC)=C(OC)C(.p
db'-O 45_lig45\45_lig45_.pdbqt
obabel
'46_lig46\3D_structure_new_colchicine45_C=12N(N=NC=1C(OCC3=CC=C(C=C3)F.p
db'-O 46_lig46\46_lig46_.pdbqt
obabel
'47_lig47\3D_structure_new_colchicine46_C=1N(N=NC=1C(=O)OCC2=CC=C(C=C2.p
db'-O 47_lig47\47_lig47_.pdbqt
obabel
'48_lig48\3D_structure_new_colchicine47_O=CC1=C(C(OCC)=O)N(N=N1)[C@@H1.p
db'-O 48_lig48\48_lig48_.pdbqt
obabel
'49_lig49\3D_structure_new_colchicine48_O=C(C(C1)C1)NC(=O)N[C@H1]1CCC2.p
db'-O 49_lig49\49_lig49_.pdbqt
obabel
'4_lig4\3D_structure_new_colchicine3_COC1=C2C3=CC=C(NC)C(=O)C=C3[C@.pdb'
-O 4_lig4\4_lig4_.pdbqt
obabel
'50_lig50\3D_structure_new_colchicine49_O=C(C(C1)C1)NCC1=CN(N=N1)[C@H1.p
db'-O 50_lig50\50_lig50_.pdbqt
obabel
'51_lig51\3D_structure_new_colchicine50_O=C(C(C1)C1)NC(=O)N[C@H1]1CCC2.p
db'-O 51_lig51\51_lig51_.pdbqt
obabel
'52_lig52\3D_structure_new_colchicine51_O=C(O)C=C(C(OCC)=O)N=NN[C@H1]1.p
db'-O 52_lig52\52_lig52_.pdbqt
obabel
'53_lig53\3D_structure_new_colchicine52_O=C(O)C1=C(C(OCC)=O)N=NN1[C@H1.p
db'-O 53_lig53\53_lig53_.pdbqt
obabel
'54_lig54\3D_structure_new_colchicine53_O=C(OCC)C1=CN(N=N1)[C@H1]2CCC3.p
db'-O 54_lig54\54_lig54_.pdbqt
obabel
'55_lig55\3D_structure_new_colchicine54_O=C(O)C1=CN(N=N1)[C@H1]2CCC3=C.p
db'-O 55_lig55\55_lig55_.pdbqt
obabel
'56_lig56\3D_structure_new_colchicine55_O=C(O)C1=C(C(OCC)=O)N=NN1[C@H1.p
db'-O 56_lig56\56_lig56_.pdbqt

```

```

obabel
'57_lig57\3D_structure_new_colchicine56_CCCCCCCCCCCCCCCC(OCC1=CN(N=N1)).pdb' -O 57_lig57\57_lig57_.pdbqt
obabel
'58_lig58\3D_structure_new_colchicine57_OC(=O)C1=C(C(OCC)=O)N(N=N1)[C@.pdb' -O 58_lig58\58_lig58_.pdbqt
obabel
'59_lig59\3D_structure_new_colchicine58_C1=C(OC)C=C(OC)C=C1CC[C@H1](C=.pdb' -O 59_lig59\59_lig59_.pdbqt
obabel
'5_lig5\3D_structure_new_colchicine4_O=CC1=CN=NN1[C@H1]2CCC3=CC(OC).pdb' -O 5_lig5\5_lig5_.pdbqt
obabel
'60_lig60\3D_structure_new_colchicine59_N(C)C(=O)NCCC(OCC1=CN(N=N1)[C@.pdb' -O 60_lig60\60_lig60_.pdbqt
obabel
'61_lig61\3D_structure_new_colchicine60_OC(=O)C=C(C(OCC)=O)N(NCCC)N[C@.pdb' -O 61_lig61\61_lig61_.pdbqt
obabel
'62_lig62\3D_structure_new_colchicine61_C[C@H1](NCC)CC1=CC(C(NC)=CC=C1.pdb' -O 62_lig62\62_lig62_.pdbqt
obabel '63_lig63\3D_NsTQ4B.pdb' -O 63_lig63\63_lig63_.pdbqt
obabel
'64_lig64\3D_structure_new_colchicine63_N1=NN1[C@@H1]2C3=CC(C(NC)=CC=C.pdb' -O 64_lig64\64_lig64_.pdbqt
obabel
'65_lig65\3D_structure_new_colchicine64_O=CC=CC=CC(NCC1=CN(N=N1)[C@H1].pdb' -O 65_lig65\65_lig65_.pdbqt
obabel
'66_lig66\3D_structure_new_colchicine65_CN(N([C@@H1]1C2=CC(=O)C(NC)=CC.pdb' -O 66_lig66\66_lig66_.pdbqt
obabel
'67_lig67\3D_structure_new_colchicine66_CC(C)C(=O)OCC1=CN(N=N1)[C@H1]2.pdb' -O 67_lig67\67_lig67_.pdbqt
obabel
'68_lig68\3D_structure_new_colchicine67_N(C(C1=CC=NC=C1)=O)[C@@H1]2C=3.pdb' -O 68_lig68\68_lig68_.pdbqt
obabel
'69_lig69\3D_structure_new_colchicine68_N1(CCCC1)CN[C@H1]2CCC3=C(C(OC).pdb' -O 69_lig69\69_lig69_.pdbqt
obabel
'6_lig6\3D_structure_new_colchicine5_OC1=CC=C(C=C1)CN[C@H1]2CCC3=C(.pdb' -O 6_lig6\6_lig6_.pdbqt
obabel
'70_lig70\3D_structure_new_colchicine69_N1(CCCC1)C(=O)OC2=C(OC)C(OC3)=.pdb' -O 70_lig70\70_lig70_.pdbqt
obabel
'71_lig71\3D_structure_new_colchicine70_CNC=1C(=O)C=C2[C@H1](CCC3=CC(O.pdb' -O 71_lig71\71_lig71_.pdbqt
obabel
'72_lig72\3D_structure_new_colchicine71_CC(C)(C)OC(=O)NCCC(NCC=1N=NN(C.pdb' -O 72_lig72\72_lig72_.pdbqt
obabel '73_lig73\3D_8godGN.pdb' -O 73_lig73\73_lig73_.pdbqt

```

```

obabel
'74_lig74\3D_structure_new_colchicine73_CC(C)(C)OCNCCC(=O)NCC1=CN(N=N1).p
db'-O 74_lig74\74_lig74_.pdbqt
obabel '75_lig75\3D_YDrpzN.pdb' -O 75_lig75\75_lig75_.pdbqt
obabel
'76_lig76\3D_structure_new_colchicine75_CC(C)(C)OC(=O)NCCC(OCC=1N=NN(C.p
db'-O 76_lig76\76_lig76_.pdbqt
obabel
'77_lig77\3D_structure_new_colchicine76_CC(C)(C)OC(=O)NCCC(NCC=1N=NN(C.p
db'-O 77_lig77\77_lig77_.pdbqt
obabel
'78_lig78\3D_structure_new_colchicine77_CNCCC1=CC=C(C=C1)NC(=O)N[C@H1].p
db'-O 78_lig78\78_lig78_.pdbqt
obabel
'79_lig79\3D_structure_new_colchicine78_CNCC(C1=CC=C(C=C1)NC(=O)N[C@@H.p
db'-O 79_lig79\79_lig79_.pdbqt
obabel
'7_lig7\3D_structure_new_colchicine6_OC1=CC=C(C=C1)CN[C@H1]2CCC3=CC.pdb'
-O 7_lig7\7_lig7_.pdbqt
obabel
'80_lig80\3D_structure_new_colchicine79_O=C(OC)OCC1=CN(N=N1)[C@H1]2CCC.p
db'-O 80_lig80\80_lig80_.pdbqt
obabel
'81_lig81\3D_structure_new_colchicine80_O=C(C(C)C)NC(=S)N[C@@H1]1C=2C(.p
db'-O 81_lig81\81_lig81_.pdbqt
obabel
'82_lig82\3D_structure_new_colchicine81_O=C(OCC)OCC=1N=NN(C=1)[C@H1]2C.p
db'-O 82_lig82\82_lig82_.pdbqt
obabel
'83_lig83\3D_structure_new_colchicine82_O=C(OCC)CN(CCO)C(=S)N[C@H1]1CC.p
db'-O 83_lig83\83_lig83_.pdbqt
obabel
'84_lig84\3D_structure_new_colchicine83_CC(C)CNCC1=CN(N=N1)[C@H1]2CCC3.p
db'-O 84_lig84\84_lig84_.pdbqt
obabel
'85_lig85\3D_structure_new_colchicine84_CC(C)CNCC1=CN(N=N1)[C@H1]2CCC3.p
db'-O 85_lig85\85_lig85_.pdbqt
obabel
'86_lig86\3D_structure_new_colchicine85_COCNCC1=CN(N=N1)[C@H1]2CCC3=CC.p
db'-O 86_lig86\86_lig86_.pdbqt
obabel
'87_lig87\3D_structure_new_colchicine86_N(C(C)C)C(NCC1=CN(N=N1)[C@H1]2.p
db'-O 87_lig87\87_lig87_.pdbqt
obabel
'88_lig88\3D_structure_new_colchicine87_N(C)C1=CC=C2C3=C(OC)C(OC)=C(OC.p
db'-O 88_lig88\88_lig88_.pdbqt
obabel
'89_lig89\3D_structure_new_colchicine88_N(C(C(C)C)=O)C1=CN(N=N1)[C@H1].p
db'-O 89_lig89\89_lig89_.pdbqt
obabel
'8_lig8\3D_structure_new_colchicine7_O=CC1=C2[C@H1](CCC3=CC(OC)=C(O.pdb'
-O 8_lig8\8_lig8_.pdbqt

```

```

obabel
'90_lig90\3D_structure_new_colchicine89_N(CCCCCC=O)CC1=CN(N=N1)[C@H1].p
db' -O 90_lig90\90_lig90_.pdbqt
obabel
'91_lig91\3D_structure_new_colchicine90_C1=C(C=CC(C1)=C1)COC(=O)CN[C@@.p
db' -O 91_lig91\91_lig91_.pdbqt
obabel
'92_lig92\3D_structure_new_colchicine91_N(C)C1=CC=C2C3=C(OC)C(OC)=C(OC.p
db' -O 92_lig92\92_lig92_.pdbqt
obabel
'93_lig93\3D_structure_new_colchicine92_N(C)C1=CC=C2C3=C(OC)C(OC)=C(OC.p
db' -O 93_lig93\93_lig93_.pdbqt
obabel
'94_lig94\3D_structure_new_colchicine93_N(C(C)C)CC(=O)OCC1=C2N(N=N1)[C.p
db' -O 94_lig94\94_lig94_.pdbqt
obabel
'95_lig95\3D_structure_new_colchicine94_CC(CC)N[C@@H1]1C2=CC(C(SC)=CC=.p
db' -O 95_lig95\95_lig95_.pdbqt
obabel
'96_lig96\3D_structure_new_colchicine95_CC(CC)N[C@@H1]C1=C2C(C(NC)=CC=.p
db' -O 96_lig96\96_lig96_.pdbqt
obabel
'97_lig97\3D_structure_new_colchicine96_COC1=C2C3=CC=C(NC)C(=O)C=C3[C@.p
db' -O 97_lig97\97_lig97_.pdbqt
obabel
'98_lig98\3D_structure_new_colchicine97_N(C)C=1C(=O)C=C2[C@H1](CCC3=CC.p
db' -O 98_lig98\98_lig98_.pdbqt
obabel
'99_lig99\3D_structure_new_colchicine98_CNC=1C(C=C2[C@H1](CCC3=C(C(OC).p
db' -O 99_lig99\99_lig99_.pdbqt
obabel
'9_lig9\3D_structure_new_colchicine8_C1=2[C@H1](CCC3=CC(OC)=C(OC)C(.pdb'
-O 9_lig9\9_lig9_.pdbqt

```

#####

# FILE 51

#####

```
vina --config 1_lig1_\config.txt --log 1_lig1_\MD_log_.txt &
vina --config 2_lig2_\config.txt --log 2_lig2_\MD_log_.txt &
vina --config 3_lig3_\config.txt --log 3_lig3_\MD_log_.txt &
vina --config 4_lig4_\config.txt --log 4_lig4_\MD_log_.txt &
vina --config 5_lig5_\config.txt --log 5_lig5_\MD_log_.txt &
vina --config 6_lig6_\config.txt --log 6_lig6_\MD_log_.txt &
vina --config 7_lig7_\config.txt --log 7_lig7_\MD_log_.txt &
vina --config 8_lig8_\config.txt --log 8_lig8_\MD_log_.txt &
vina --config 9_lig9_\config.txt --log 9_lig9_\MD_log_.txt &
vina --config 10_lig10_\config.txt --log 10_lig10_\MD_log_.txt &
vina --config 11_lig11_\config.txt --log 11_lig11_\MD_log_.txt &
vina --config 12_lig12_\config.txt --log 12_lig12_\MD_log_.txt &
vina --config 13_lig13_\config.txt --log 13_lig13_\MD_log_.txt &
vina --config 14_lig14_\config.txt --log 14_lig14_\MD_log_.txt &
vina --config 15_lig15_\config.txt --log 15_lig15_\MD_log_.txt &
vina --config 16_lig16_\config.txt --log 16_lig16_\MD_log_.txt &
vina --config 17_lig17_\config.txt --log 17_lig17_\MD_log_.txt &
vina --config 18_lig18_\config.txt --log 18_lig18_\MD_log_.txt &
vina --config 19_lig19_\config.txt --log 19_lig19_\MD_log_.txt &
vina --config 20_lig20_\config.txt --log 20_lig20_\MD_log_.txt &
vina --config 21_lig21_\config.txt --log 21_lig21_\MD_log_.txt &
vina --config 22_lig22_\config.txt --log 22_lig22_\MD_log_.txt &
vina --config 23_lig23_\config.txt --log 23_lig23_\MD_log_.txt &
vina --config 24_lig24_\config.txt --log 24_lig24_\MD_log_.txt &
vina --config 25_lig25_\config.txt --log 25_lig25_\MD_log_.txt &
vina --config 26_lig26_\config.txt --log 26_lig26_\MD_log_.txt &
vina --config 27_lig27_\config.txt --log 27_lig27_\MD_log_.txt &
vina --config 28_lig28_\config.txt --log 28_lig28_\MD_log_.txt &
vina --config 29_lig29_\config.txt --log 29_lig29_\MD_log_.txt &
vina --config 30_lig30_\config.txt --log 30_lig30_\MD_log_.txt &
vina --config 31_lig31_\config.txt --log 31_lig31_\MD_log_.txt &
vina --config 32_lig32_\config.txt --log 32_lig32_\MD_log_.txt &
vina --config 33_lig33_\config.txt --log 33_lig33_\MD_log_.txt &
vina --config 34_lig34_\config.txt --log 34_lig34_\MD_log_.txt &
vina --config 35_lig35_\config.txt --log 35_lig35_\MD_log_.txt &
vina --config 36_lig36_\config.txt --log 36_lig36_\MD_log_.txt &
vina --config 37_lig37_\config.txt --log 37_lig37_\MD_log_.txt &
vina --config 38_lig38_\config.txt --log 38_lig38_\MD_log_.txt &
vina --config 39_lig39_\config.txt --log 39_lig39_\MD_log_.txt &
vina --config 40_lig40_\config.txt --log 40_lig40_\MD_log_.txt &
vina --config 41_lig41_\config.txt --log 41_lig41_\MD_log_.txt &
vina --config 42_lig42_\config.txt --log 42_lig42_\MD_log_.txt &
vina --config 43_lig43_\config.txt --log 43_lig43_\MD_log_.txt &
vina --config 44_lig44_\config.txt --log 44_lig44_\MD_log_.txt &
vina --config 45_lig45_\config.txt --log 45_lig45_\MD_log_.txt &
vina --config 46_lig46_\config.txt --log 46_lig46_\MD_log_.txt &
vina --config 47_lig47_\config.txt --log 47_lig47_\MD_log_.txt &
vina --config 48_lig48_\config.txt --log 48_lig48_\MD_log_.txt &
vina --config 49_lig49_\config.txt --log 49_lig49_\MD_log_.txt &
vina --config 50_lig50_\config.txt --log 50_lig50_\MD_log_.txt &
vina --config 51_lig51_\config.txt --log 51_lig51_\MD_log_.txt &
```

```
vina --config 52_lig52_\config.txt --log 52_lig52_\MD_log_.txt &
vina --config 53_lig53_\config.txt --log 53_lig53_\MD_log_.txt &
vina --config 54_lig54_\config.txt --log 54_lig54_\MD_log_.txt &
vina --config 55_lig55_\config.txt --log 55_lig55_\MD_log_.txt &
vina --config 56_lig56_\config.txt --log 56_lig56_\MD_log_.txt &
vina --config 57_lig57_\config.txt --log 57_lig57_\MD_log_.txt &
vina --config 58_lig58_\config.txt --log 58_lig58_\MD_log_.txt &
vina --config 59_lig59_\config.txt --log 59_lig59_\MD_log_.txt &
vina --config 60_lig60_\config.txt --log 60_lig60_\MD_log_.txt &
vina --config 61_lig61_\config.txt --log 61_lig61_\MD_log_.txt &
vina --config 62_lig62_\config.txt --log 62_lig62_\MD_log_.txt &
vina --config 63_lig63_\config.txt --log 63_lig63_\MD_log_.txt &
vina --config 64_lig64_\config.txt --log 64_lig64_\MD_log_.txt &
vina --config 65_lig65_\config.txt --log 65_lig65_\MD_log_.txt &
vina --config 66_lig66_\config.txt --log 66_lig66_\MD_log_.txt &
vina --config 67_lig67_\config.txt --log 67_lig67_\MD_log_.txt &
vina --config 68_lig68_\config.txt --log 68_lig68_\MD_log_.txt &
vina --config 69_lig69_\config.txt --log 69_lig69_\MD_log_.txt &
vina --config 70_lig70_\config.txt --log 70_lig70_\MD_log_.txt &
vina --config 71_lig71_\config.txt --log 71_lig71_\MD_log_.txt &
vina --config 72_lig72_\config.txt --log 72_lig72_\MD_log_.txt &
vina --config 73_lig73_\config.txt --log 73_lig73_\MD_log_.txt &
vina --config 74_lig74_\config.txt --log 74_lig74_\MD_log_.txt &
vina --config 75_lig75_\config.txt --log 75_lig75_\MD_log_.txt &
vina --config 76_lig76_\config.txt --log 76_lig76_\MD_log_.txt &
vina --config 77_lig77_\config.txt --log 77_lig77_\MD_log_.txt &
vina --config 78_lig78_\config.txt --log 78_lig78_\MD_log_.txt &
vina --config 79_lig79_\config.txt --log 79_lig79_\MD_log_.txt &
vina --config 80_lig80_\config.txt --log 80_lig80_\MD_log_.txt &
vina --config 81_lig81_\config.txt --log 81_lig81_\MD_log_.txt &
vina --config 82_lig82_\config.txt --log 82_lig82_\MD_log_.txt &
vina --config 83_lig83_\config.txt --log 83_lig83_\MD_log_.txt &
vina --config 84_lig84_\config.txt --log 84_lig84_\MD_log_.txt &
vina --config 85_lig85_\config.txt --log 85_lig85_\MD_log_.txt &
vina --config 86_lig86_\config.txt --log 86_lig86_\MD_log_.txt &
vina --config 87_lig87_\config.txt --log 87_lig87_\MD_log_.txt &
vina --config 88_lig88_\config.txt --log 88_lig88_\MD_log_.txt &
vina --config 89_lig89_\config.txt --log 89_lig89_\MD_log_.txt &
vina --config 90_lig90_\config.txt --log 90_lig90_\MD_log_.txt &
vina --config 91_lig91_\config.txt --log 91_lig91_\MD_log_.txt &
vina --config 92_lig92_\config.txt --log 92_lig92_\MD_log_.txt &
vina --config 93_lig93_\config.txt --log 93_lig93_\MD_log_.txt &
vina --config 94_lig94_\config.txt --log 94_lig94_\MD_log_.txt &
vina --config 95_lig95_\config.txt --log 95_lig95_\MD_log_.txt &
vina --config 96_lig96_\config.txt --log 96_lig96_\MD_log_.txt &
vina --config 97_lig97_\config.txt --log 97_lig97_\MD_log_.txt &
vina --config 98_lig98_\config.txt --log 98_lig98_\MD_log_.txt &
vina --config 99_lig99_\config.txt --log 99_lig99_\MD_log_.txt &
vina --config 100_lig100_\config.txt --log 100_lig100_\MD_log_.txt &
vina --config 101_lig101_\config.txt --log 101_lig101_\MD_log_.txt &
vina --config 102_lig102_\config.txt --log 102_lig102_\MD_log_.txt &
vina --config 103_lig103_\config.txt --log 103_lig103_\MD_log_.txt &
vina --config 104_lig104_\config.txt --log 104_lig104_\MD_log_.txt &
vina --config 105_lig105_\config.txt --log 105_lig105_\MD_log_.txt &
```

[illegible]



[illegible]

[illegible]

[illegible]

```
vina --config 322_lig322_\config.txt --log 322_lig322_\MD_log_.txt &
vina --config 323_lig323_\config.txt --log 323_lig323_\MD_log_.txt &
vina --config 324_lig324_\config.txt --log 324_lig324_\MD_log_.txt &
vina --config 325_lig325_\config.txt --log 325_lig325_\MD_log_.txt &
vina --config 326_lig326_\config.txt --log 326_lig326_\MD_log_.txt &
vina --config 327_lig327_\config.txt --log 327_lig327_\MD_log_.txt &
vina --config 328_lig328_\config.txt --log 328_lig328_\MD_log_.txt &
vina --config 329_lig329_\config.txt --log 329_lig329_\MD_log_.txt &
vina --config 330_lig330_\config.txt --log 330_lig330_\MD_log_.txt &
vina --config 331_lig331_\config.txt --log 331_lig331_\MD_log_.txt &
vina --config 332_lig332_\config.txt --log 332_lig332_\MD_log_.txt &
vina --config 333_lig333_\config.txt --log 333_lig333_\MD_log_.txt &
vina --config 334_lig334_\config.txt --log 334_lig334_\MD_log_.txt &
vina --config 335_lig335_\config.txt --log 335_lig335_\MD_log_.txt &
vina --config 336_lig336_\config.txt --log 336_lig336_\MD_log_.txt &
vina --config 337_lig337_\config.txt --log 337_lig337_\MD_log_.txt &
```

# Notebook

January 18, 2024

## 1 File 53

```
[1]: import pandas as pd
import matplotlib.pyplot as plt
%matplotlib inline
from rdkit import Chem
from rdkit.Chem import PandasTools
```

```
[2]: all_docked = pd.read_excel('../Data/Colchicine - AI, MD.xlsx')
```

```
[3]: all_docked.head()
```

```
[3]:
```

|   | Index | Structure | SMILES                                              | \ |
|---|-------|-----------|-----------------------------------------------------|---|
| 0 | 1     | NaN       | COC1=C2C3=CC=C(NC)C(=O)C=C3[C@H1] (CCC2=CC(OC)=...  |   |
| 1 | 2     | NaN       | COC1=C2C3=CC=C(NC)C(=O)C=C3[C@H1] (CCC2=CC(OC)=...  |   |
| 2 | 3     | NaN       | COC1=C2C3=CC=C(NC)C(=O)C=C3[C@H1] (CCC2=CC(OC)=...  |   |
| 3 | 4     | NaN       | COC1=C2C3=CC=C(NC)C(=O)C=C3[C@H1] (CCC2=CC(OC)=...  |   |
| 4 | 5     | NaN       | O=CC1=CN=NN1 [C@H1] 2CCC3=CC(OC)=C(OC)C(OC)=C3C4... |   |

|   | SYBA score | A549 [nM] | BALB/3T3 [nM] | LoVo [nM] | LoVo/DX [nM] | MCF-7 [nM] | \ |
|---|------------|-----------|---------------|-----------|--------------|------------|---|
| 0 | 45.88      | 8.348220  | 10.933929     | 6.176982  | 94.278083    | 8.357629   |   |
| 1 | 68.25      | 13.578222 | 11.636406     | 13.612706 | 33.064228    | 10.167834  |   |
| 2 | 74.22      | 16.404839 | 39.119200     | 41.777761 | 24.143942    | 9.099151   |   |
| 3 | 40.43      | 18.107777 | 27.000988     | 9.635175  | 232.135864   | 5.400000   |   |
| 4 | 41.84      | 6.445819  | 10.817093     | 8.763690  | 1553.892060  | 12.029326  |   |

|   | RI LoVo | SI BALB3/T3 (A549) | SI BALB3/T3 (LoVo) | SI BALB3/T3 (LoVo/DX) | \ |
|---|---------|--------------------|--------------------|-----------------------|---|
| 0 | 15.26   | 1.31               | 1.77               | 0.12                  |   |
| 1 | 2.43    | 0.86               | 0.85               | 0.35                  |   |
| 2 | 0.58    | 2.38               | 0.94               | 1.62                  |   |
| 3 | 24.09   | 1.49               | 2.80               | 0.12                  |   |
| 4 | 177.31  | 1.68               | 1.23               | 0.01                  |   |

|   | SI BALB3/T3 (MCF-7) | Affinity to 1SA0 [kcal/mol] |
|---|---------------------|-----------------------------|
| 0 | 1.31                | -7.8                        |
| 1 | 1.14                | -7.6                        |
| 2 | 4.30                | -8.4                        |
| 3 | 5.00                | -8.2                        |

4 0.90 -8.1

```
[4]: all_docked.rename(columns={'Index': 'ligand number'}, inplace=True)
all_docked.head()
```

```
[4]:
```

|   | ligand number | Structure \ |
|---|---------------|-------------|
| 0 | 1             | NaN         |
| 1 | 2             | NaN         |
| 2 | 3             | NaN         |
| 3 | 4             | NaN         |
| 4 | 5             | NaN         |

  

|   | SMILES                                                         | SYBA score | A549 [nM] \ |
|---|----------------------------------------------------------------|------------|-------------|
| 0 | <chem>COC1=C2C3=CC=C(NC)C(=O)C=C3[C@H1](CCC2=CC(OC)=...</chem> | 45.88      | 8.348220    |
| 1 | <chem>COC1=C2C3=CC=C(NC)C(=O)C=C3[C@H1](CCC2=CC(OC)=...</chem> | 68.25      | 13.578222   |
| 2 | <chem>COC1=C2C3=CC=C(NC)C(=O)C=C3[C@H1](CCC2=CC(OC)=...</chem> | 74.22      | 16.404839   |
| 3 | <chem>COC1=C2C3=CC=C(NC)C(=O)C=C3[C@H1](CCC2=CC(OC)=...</chem> | 40.43      | 18.107777   |
| 4 | <chem>O=CC1=CN=NN1[C@H1]2CCC3=CC(OC)=C(OC)C(OC)=C3C4...</chem> | 41.84      | 6.445819    |

  

|   | BALB/3T3 [nM] | LoVo [nM] | LoVo/DX [nM] | MCF-7 [nM] | RI LoVo \ |
|---|---------------|-----------|--------------|------------|-----------|
| 0 | 10.933929     | 6.176982  | 94.278083    | 8.357629   | 15.26     |
| 1 | 11.636406     | 13.612706 | 33.064228    | 10.167834  | 2.43      |
| 2 | 39.119200     | 41.777761 | 24.143942    | 9.099151   | 0.58      |
| 3 | 27.000988     | 9.635175  | 232.135864   | 5.400000   | 24.09     |
| 4 | 10.817093     | 8.763690  | 1553.892060  | 12.029326  | 177.31    |

  

|   | SI BALB3/T3 (A549) | SI BALB3/T3 (LoVo) | SI BALB3/T3 (LoVo/DX) \ |
|---|--------------------|--------------------|-------------------------|
| 0 | 1.31               | 1.77               | 0.12                    |
| 1 | 0.86               | 0.85               | 0.35                    |
| 2 | 2.38               | 0.94               | 1.62                    |
| 3 | 1.49               | 2.80               | 0.12                    |
| 4 | 1.68               | 1.23               | 0.01                    |

  

|   | SI BALB3/T3 (MCF-7) | Affinity to 1SA0 [kcal/mol] |
|---|---------------------|-----------------------------|
| 0 | 1.31                | -7.8                        |
| 1 | 1.14                | -7.6                        |
| 2 | 4.30                | -8.4                        |
| 3 | 5.00                | -8.2                        |
| 4 | 0.90                | -8.1                        |

```
[5]: chirality_selection = pd.read_excel('../Data/new_structures_S_chirality.xlsx')
```

```
[6]: chirality_selection.head()
```

```
[6]:
```

|   | Unnamed: 0 | Unnamed: 0.1 \ |
|---|------------|----------------|
| 0 | 0          | NaN            |
| 1 | 1          | NaN            |

|   |   |     |
|---|---|-----|
| 2 | 2 | NaN |
| 3 | 3 | NaN |
| 4 | 4 | NaN |

|   | SMILES                                                         | SYBA score | A549 [nM] | \ |
|---|----------------------------------------------------------------|------------|-----------|---|
| 0 | <chem>COC1=C2C3=CC=C(NC)C(=O)C=C3[C@H1](CCC2=CC(OC)=...</chem> | 45.88      | 10.168579 |   |
| 1 | <chem>COC1=C2C3=CC=C(NC)C(=O)C=C3[C@H1](CCC2=CC(OC)=...</chem> | 68.25      | 10.648944 |   |
| 2 | <chem>COC1=C2C3=CC=C(NC)C(=O)C=C3[C@H1](CCC2=CC(OC)=...</chem> | 74.22      | 11.794066 |   |
| 3 | <chem>COC1=C2C3=CC=C(NC)C(=O)C=C3[C@H1](CCC2=CC(OC)=...</chem> | 40.43      | 6.400000  |   |
| 4 | <chem>O=CC1=CN=NN1[C@H1]2CCC3=CC(OC)=C(OC)C(OC)=C3C4...</chem> | 41.84      | 4.774935  |   |

|   | BALB/3T3 [nM] | LoVo [nM] | LoVo/DX [nM] | MCF-7 [nM] | atom_num | chirality |
|---|---------------|-----------|--------------|------------|----------|-----------|
| 0 | 6.200000      | 5.700000  | 136.586050   | 8.357629   | 14       | S         |
| 1 | 9.439809      | 17.460496 | 49.797629    | 10.167834  | 14       | S         |
| 2 | 30.305940     | 54.000000 | 37.606395    | 9.099151   | 14       | S         |
| 3 | 23.752895     | 8.570105  | 210.367783   | 5.400000   | 14       | S         |
| 4 | 11.772850     | 10.000000 | 1806.439871  | 12.029326  | 7        | S         |

```
[7]: chirality_selection.rename(columns={'Unnamed: 0': 'ligand number'},
    inplace=True)
chirality_selection.head()
```

```
[7]:
```

|   | ligand number | Unnamed: 0.1 | \ |
|---|---------------|--------------|---|
| 0 | 0             | NaN          |   |
| 1 | 1             | NaN          |   |
| 2 | 2             | NaN          |   |
| 3 | 3             | NaN          |   |
| 4 | 4             | NaN          |   |

|   | SMILES                                                         | SYBA score | A549 [nM] | \ |
|---|----------------------------------------------------------------|------------|-----------|---|
| 0 | <chem>COC1=C2C3=CC=C(NC)C(=O)C=C3[C@H1](CCC2=CC(OC)=...</chem> | 45.88      | 10.168579 |   |
| 1 | <chem>COC1=C2C3=CC=C(NC)C(=O)C=C3[C@H1](CCC2=CC(OC)=...</chem> | 68.25      | 10.648944 |   |
| 2 | <chem>COC1=C2C3=CC=C(NC)C(=O)C=C3[C@H1](CCC2=CC(OC)=...</chem> | 74.22      | 11.794066 |   |
| 3 | <chem>COC1=C2C3=CC=C(NC)C(=O)C=C3[C@H1](CCC2=CC(OC)=...</chem> | 40.43      | 6.400000  |   |
| 4 | <chem>O=CC1=CN=NN1[C@H1]2CCC3=CC(OC)=C(OC)C(OC)=C3C4...</chem> | 41.84      | 4.774935  |   |

|   | BALB/3T3 [nM] | LoVo [nM] | LoVo/DX [nM] | MCF-7 [nM] | atom_num | chirality |
|---|---------------|-----------|--------------|------------|----------|-----------|
| 0 | 6.200000      | 5.700000  | 136.586050   | 8.357629   | 14       | S         |
| 1 | 9.439809      | 17.460496 | 49.797629    | 10.167834  | 14       | S         |
| 2 | 30.305940     | 54.000000 | 37.606395    | 9.099151   | 14       | S         |
| 3 | 23.752895     | 8.570105  | 210.367783   | 5.400000   | 14       | S         |
| 4 | 11.772850     | 10.000000 | 1806.439871  | 12.029326  | 7        | S         |

```
[8]: dock_res = all_docked[all_docked['SMILES'].
    isin(list(chirality_selection['SMILES']))]
```

```
[9]: dock_res
```

[9]:

|     | ligand number | Structure \ |
|-----|---------------|-------------|
| 0   | 1             | NaN         |
| 1   | 2             | NaN         |
| 2   | 3             | NaN         |
| 3   | 4             | NaN         |
| 4   | 5             | NaN         |
| ..  | ...           | ...         |
| 332 | 333           | NaN         |
| 333 | 334           | NaN         |
| 334 | 335           | NaN         |
| 335 | 336           | NaN         |
| 336 | 337           | NaN         |

|     | SMILES                                                         | SYBA score \ |
|-----|----------------------------------------------------------------|--------------|
| 0   | <chem>COC1=C2C3=CC=C(NC)C(=O)C=C3[C@H1](CCC2=CC(OC)=...</chem> | 45.88        |
| 1   | <chem>COC1=C2C3=CC=C(NC)C(=O)C=C3[C@H1](CCC2=CC(OC)=...</chem> | 68.25        |
| 2   | <chem>COC1=C2C3=CC=C(NC)C(=O)C=C3[C@H1](CCC2=CC(OC)=...</chem> | 74.22        |
| 3   | <chem>COC1=C2C3=CC=C(NC)C(=O)C=C3[C@H1](CCC2=CC(OC)=...</chem> | 40.43        |
| 4   | <chem>O=CC1=CN=NN1[C@H1]2CCC3=CC(OC)=C(OC)C(OC)=C3C4...</chem> | 41.84        |
| ..  | ...                                                            | ...          |
| 332 | <chem>N([C@H1]1CCC2=C(C(OC)=C(OC)C(OC)=C2)C3=CC=C(NC...</chem> | 50.61        |
| 333 | <chem>O=C(C=C(C1)C=CN([C@H1]1CCC2=C(C(OC)=C(OC)C(OC)...</chem> | 55.61        |
| 334 | <chem>CC(C)(C)OC(=O)/N=C(/N[C@H1]1CCC2=C(C(OC)=C(OC)...</chem> | 77.77        |
| 335 | <chem>CC(C)(C)OC(=O)/N=C(/N[C@H1]1CCC2=C(C(OC)=C(OC)...</chem> | 74.50        |
| 336 | <chem>C12=C3C(C4=C(OC)C(OC)=C(OC)C=C4CC[C@H1]3NC(=O...</chem>  | 44.20        |

|     | A549 [nM]  | BALB/3T3 [nM] | LoVo [nM]  | LoVo/DX [nM] | MCF-7 [nM] | RI LoVo \ |
|-----|------------|---------------|------------|--------------|------------|-----------|
| 0   | 8.348220   | 10.933929     | 6.176982   | 94.278083    | 8.357629   | 15.26     |
| 1   | 13.578222  | 11.636406     | 13.612706  | 33.064228    | 10.167834  | 2.43      |
| 2   | 16.404839  | 39.119200     | 41.777761  | 24.143942    | 9.099151   | 0.58      |
| 3   | 18.107777  | 27.000988     | 9.635175   | 232.135864   | 5.400000   | 24.09     |
| 4   | 6.445819   | 10.817093     | 8.763690   | 1553.892060  | 12.029326  | 177.31    |
| ..  | ...        | ...           | ...        | ...          | ...        | ...       |
| 332 | 7.718822   | 14.078016     | 6.176982   | 342.962430   | 9.577028   | 55.52     |
| 333 | 697.197228 | 1057.618868   | 803.006371 | 6999.610248  | 449.451787 | 8.72      |
| 334 | 640.864950 | 503.426708    | 63.156498  | 9415.565981  | 438.651686 | 149.08    |
| 335 | 738.759051 | 483.152174    | 164.873587 | 10571.477341 | 45.510081  | 64.12     |
| 336 | 10.449190  | 122.159988    | 9.635175   | 1952.664035  | 24.303734  | 202.66    |

|     | SI BALB3/T3 (A549) | SI BALB3/T3 (LoVo) | SI BALB3/T3 (LoVo/DX) \ |
|-----|--------------------|--------------------|-------------------------|
| 0   | 1.31               | 1.77               | 0.12                    |
| 1   | 0.86               | 0.85               | 0.35                    |
| 2   | 2.38               | 0.94               | 1.62                    |
| 3   | 1.49               | 2.80               | 0.12                    |
| 4   | 1.68               | 1.23               | 0.01                    |
| ..  | ...                | ...                | ...                     |
| 332 | 1.82               | 2.28               | 0.04                    |



|     |       |       |      |
|-----|-------|-------|------|
| 333 | 1.52  | 1.32  | 0.15 |
| 334 | 0.79  | 7.97  | 0.05 |
| 335 | 0.65  | 2.93  | 0.05 |
| 336 | 11.69 | 12.68 | 0.06 |

|     | SI BALB3/T3 (MCF-7) | Affinity to 1SA0 [kcal/mol] |
|-----|---------------------|-----------------------------|
| 0   | 1.31                | -7.8                        |
| 1   | 1.14                | -7.6                        |
| 2   | 4.30                | -8.4                        |
| 3   | 5.00                | -8.2                        |
| 4   | 0.90                | -8.1                        |
| ..  | ...                 | ...                         |
| 332 | 1.47                | -8.7                        |
| 333 | 2.35                | -9.9                        |
| 334 | 1.15                | -7.2                        |
| 335 | 10.62               | -8.5                        |
| 336 | 5.03                | -9.4                        |

[285 rows x 15 columns]

```
[10]: dock_res['Structure'] = [Chem.MolFromSmiles(smi) for smi in dock_res['SMILES']]
PandasTools.SaveXlsxFromFrame(dock_res, '../Data/molecular_docking_chirality.
    <math>\rightarrow</math>xlsx', molCol='Structure')
#dock_res.to_excel('../Data/molecular_docking_chirality.xlsx')
```

C:\Users\aleks\AppData\Local\Temp\ipykernel\_19496\1886125816.py:1:

SettingWithCopyWarning:

A value is trying to be set on a copy of a slice from a DataFrame.

Try using .loc[row\_indexer,col\_indexer] = value instead

See the caveats in the documentation: [https://pandas.pydata.org/pandas-docs/stable/user\\_guide/indexing.html#returning-a-view-versus-a-copy](https://pandas.pydata.org/pandas-docs/stable/user_guide/indexing.html#returning-a-view-versus-a-copy)

```
    dock_res['Structure'] = [Chem.MolFromSmiles(smi) for smi in
dock_res['SMILES']]
```

```
[11]: dock_res['Affinity to 1SA0 [kcal/mol]'].hist(bins=10)
#plt.title("Distribution of binarized activity")
#plt.xlim(xmin=-0.5, xmax = 1.5)
x = [-10.5, -10, -9, -8.6, -8.2, -8, -7, -6.5]
labels = [-11, -10, -9, -8.6, -8.2, -8, -7, -6]
plt.xlabel('Binding energy [kcal/mol]')
plt.ylabel('Number of compounds')
plt.axvline(x=-8.6, color='r') #native docked
plt.axvline(x=-8.2, color='r') #colchicine
plt.rc('grid', linestyle="-. ", color='black')
plt.grid(True)
plt.xticks(x, labels)
```

```
#plt.savefig('distribution_activity.pdf', bbox_inches='tight')
plt.savefig('chirality_binding_energy.pdf', bbox_inches='tight')
```

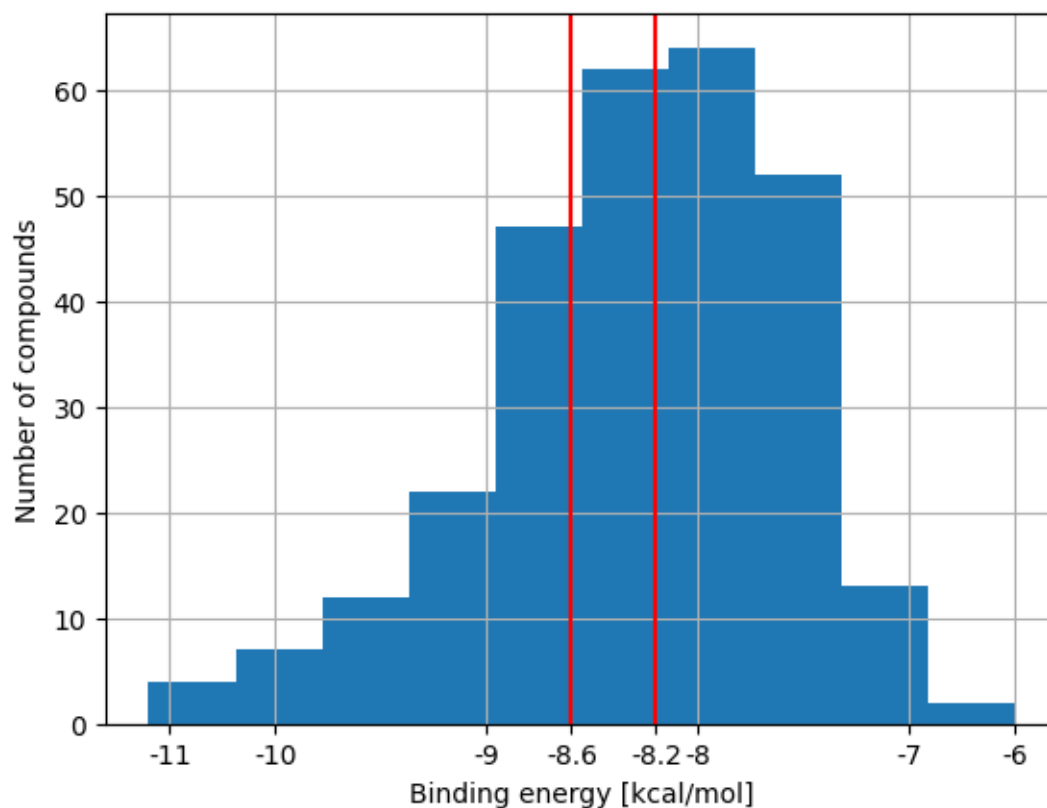

```
[12]: in_range = dock_res[dock_res['Affinity to 1SAO [kcal/mol]'] > -8.6]
      in_range = in_range[in_range['Affinity to 1SAO [kcal/mol]'] < -8.2]
```

```
[13]: the_same_0 = dock_res[dock_res['Affinity to 1SAO [kcal/mol]'] == -8.6]
      len(the_same_0)
```

```
[13]: 14
```

```
[14]: the_same_1 = dock_res[dock_res['Affinity to 1SAO [kcal/mol]'] == -8.2]
      len(the_same_1)
```

```
[14]: 15
```

```
[15]: len(in_range)
```

```
[15]: 47
```

```
[16]: in_range
```

```

[16]:      ligand number      Structure \
2          3 <rdkit.Chem.rdchem.Mol object at 0x0000021E330...
9          10 <rdkit.Chem.rdchem.Mol object at 0x0000021E330...
16         17 <rdkit.Chem.rdchem.Mol object at 0x0000021E330...
25         26 <rdkit.Chem.rdchem.Mol object at 0x0000021E330...
28         29 <rdkit.Chem.rdchem.Mol object at 0x0000021E330...
31         32 <rdkit.Chem.rdchem.Mol object at 0x0000021E331...
51         52 <rdkit.Chem.rdchem.Mol object at 0x0000021E330...
60         61 <rdkit.Chem.rdchem.Mol object at 0x0000021E330...
69         70 <rdkit.Chem.rdchem.Mol object at 0x0000021E330...
80         81 <rdkit.Chem.rdchem.Mol object at 0x0000021E330...
126        127 <rdkit.Chem.rdchem.Mol object at 0x0000021E330...
130        131 <rdkit.Chem.rdchem.Mol object at 0x0000021E330...
136        137 <rdkit.Chem.rdchem.Mol object at 0x0000021E330...
137        138 <rdkit.Chem.rdchem.Mol object at 0x0000021E330...
146        147 <rdkit.Chem.rdchem.Mol object at 0x0000021E330...
152        153 <rdkit.Chem.rdchem.Mol object at 0x0000021E330...
164        165 <rdkit.Chem.rdchem.Mol object at 0x0000021E330...
170        171 <rdkit.Chem.rdchem.Mol object at 0x0000021E330...
173        174 <rdkit.Chem.rdchem.Mol object at 0x0000021E330...
174        175 <rdkit.Chem.rdchem.Mol object at 0x0000021E330...
176        177 <rdkit.Chem.rdchem.Mol object at 0x0000021E330...
178        179 <rdkit.Chem.rdchem.Mol object at 0x0000021E330...
181        182 <rdkit.Chem.rdchem.Mol object at 0x0000021E330...
182        183 <rdkit.Chem.rdchem.Mol object at 0x0000021E330...
185        186 <rdkit.Chem.rdchem.Mol object at 0x0000021E330...
189        190 <rdkit.Chem.rdchem.Mol object at 0x0000021E330...
195        196 <rdkit.Chem.rdchem.Mol object at 0x0000021E330...
200        201 <rdkit.Chem.rdchem.Mol object at 0x0000021E330...
206        207 <rdkit.Chem.rdchem.Mol object at 0x0000021E330...
224        225 <rdkit.Chem.rdchem.Mol object at 0x0000021E330...
226        227 <rdkit.Chem.rdchem.Mol object at 0x0000021E330...
228        229 <rdkit.Chem.rdchem.Mol object at 0x0000021E330...
232        233 <rdkit.Chem.rdchem.Mol object at 0x0000021E330...
233        234 <rdkit.Chem.rdchem.Mol object at 0x0000021E330...
241        242 <rdkit.Chem.rdchem.Mol object at 0x0000021E330...
255        256 <rdkit.Chem.rdchem.Mol object at 0x0000021E330...
258        259 <rdkit.Chem.rdchem.Mol object at 0x0000021E330...
261        262 <rdkit.Chem.rdchem.Mol object at 0x0000021E330...
270        271 <rdkit.Chem.rdchem.Mol object at 0x0000021E330...
271        272 <rdkit.Chem.rdchem.Mol object at 0x0000021E330...
281        282 <rdkit.Chem.rdchem.Mol object at 0x0000021E330...
284        285 <rdkit.Chem.rdchem.Mol object at 0x0000021E330...
296        297 <rdkit.Chem.rdchem.Mol object at 0x0000021E330...
309        310 <rdkit.Chem.rdchem.Mol object at 0x0000021E330...
311        312 <rdkit.Chem.rdchem.Mol object at 0x0000021E330...
325        326 <rdkit.Chem.rdchem.Mol object at 0x0000021E330...

```

335

336 &lt;rdkit.Chem.rdchem.Mol object at 0x0000021E330...

|     | SMILES                                                         | SYBA score \ |
|-----|----------------------------------------------------------------|--------------|
| 2   | <chem>COC1=C2C3=CC=C(NC)C(=O)C=C3[C@H1](CCC2=CC(OC)=...</chem> | 74.22        |
| 9   | <chem>C1N(C(=S)N[C@@H1]2C3=CC(C(NC)=CC=C3C4=C(OC)C(O...</chem> | 49.88        |
| 16  | <chem>CC(=O)OC1=CC=C2C3=C(C(OC)=C(C=C3CC[C@@H1](C2=C...</chem> | 34.35        |
| 25  | <chem>CC(=O)N[C@@H1]1C2=CC(C(NC)=CC=C2C3=C(OC)C(OC)=...</chem> | 25.63        |
| 28  | <chem>COC1=C2C3=CC=C(NC)C(=O)C=C3[C@H1](CCC2=CC(OC)=...</chem> | 27.84        |
| 31  | <chem>COC1=C(OC)C(OC)=CC=2CC[C@H1](NC(=N)N)C3=CC(=O)...</chem> | 40.64        |
| 51  | <chem>O=C(O)C=C(C(OC)=O)N=NN[C@H1]1CCC2=CC(OC)=C(OC...</chem>  | 38.99        |
| 60  | <chem>OC(=O)C=C(C(OC)=O)N(NCCC)N[C@H1]1CCC2=CC(OC)=...</chem>  | 45.62        |
| 69  | <chem>N1(CCCC1)C(=O)OC2=C(OC)C(OC3)=CC=C2C4=CC=C(SC)...</chem> | 37.14        |
| 80  | <chem>O=C(C(C)C)NC(=S)N[C@@H1]1C=2C(C3=C(C(OC)=C(OC)...</chem> | 92.22        |
| 126 | <chem>N(CCCC)CC1=CN(N=N1)[C@H1]2CCC3=CC(OC)=C(OC)C(O...</chem> | 52.78        |
| 130 | <chem>C=CC=C(NC(=O)N[C@H1]1CCC2=CC(OC)=C(OC)C(OC)=C2...</chem> | 42.50        |
| 136 | <chem>N([C@H1]1CCC2=CC(OC)=C(OC)C(OC)=C2C3=CC=C(NC)C...</chem> | 24.37        |
| 137 | <chem>NC(CCC)N[C@@H1]1C2=CC(C(NC)=CC=C2C3=C(OC)C(OC)...</chem> | 55.10        |
| 146 | <chem>OC(C)=C1C([C@H1](CCC2=CC(OC)=C(OC)C(OC)=C12)N...</chem>  | 21.41        |
| 152 | <chem>C=C(CO)CN[C@H1]1CCC2=CC(OC)=C(OC)C(OC)=C2C3=CC...</chem> | 46.58        |
| 164 | <chem>CNCC(C)OC(=O)N[C@H1]1CCC2=C(C(OC)=C(OC)C(OC)=C...</chem> | 59.33        |
| 170 | <chem>CC=CCCN[C@H1]1CCC2=CC(OC)=C(OC)C(OC)=C2C3=CC=...</chem>  | 39.12        |
| 173 | <chem>COC1=CC=2CC[C@@H1](C=3C(C=2C(=C1OC)OC)=CC=C(NC...</chem> | 67.57        |
| 174 | <chem>CSC1=CC=C2C(=CC1=O)[C@H1](CCC3=CC(OC)=C(OC)C(=...</chem> | 22.94        |
| 176 | <chem>CC(=O)OC1=CC=C2C3=C(C(OC)=C(C=C3CC[C@@H1](C2=C...</chem> | 32.22        |
| 178 | <chem>CC(=O)OC1=CC=C2C3=C(C(OC)=C(C=C3CC[C@@H1](C2=C...</chem> | 64.15        |
| 181 | <chem>CC(C)C(OC1=CC=C2C3=C(CC[C@@H1](C2=CC1=O)NC(C)=...</chem> | 71.31        |
| 182 | <chem>CC(C)C(OC1=CC=C2C3=C(CC[C@@H1](C2=CC1=O)NC(C)=...</chem> | 39.74        |
| 185 | <chem>CC(=O)OCC1=CN(N=N1)[C@H1]2CCC3=CC(OC)=C(OC)C(O...</chem> | 67.53        |
| 189 | <chem>C=12C(=O)C(=CC=C3C=1[C@H1](CCC4=CC(OC)=C(OC)C(...</chem> | 25.47        |
| 195 | <chem>CC(C)CCN[C@H1]1CCC2=C(C3=CC=C(SC)C(C=C31)=O)C(...</chem> | 56.33        |
| 200 | <chem>O=C(C)N[C@H1]1CCC2=CC(OC)=C(C(OC)=C2C3=CC=C(C(...</chem> | 50.84        |
| 206 | <chem>CNC(=S)N[C@@H1]1C2=CC(=O)C(NC)=CC=C2C3=C(OC)C(...</chem> | 41.73        |
| 224 | <chem>O=C(C)OC1=CN(N=N1)[C@H1]2CCC3=CC(OC)=C(OC)C(OC...</chem> | 45.43        |
| 226 | <chem>O=C(C(C1)C1)NC(=O)N[C@H1]1CCC2=C(C(OC)=C(OC)C(...</chem> | 63.92        |
| 228 | <chem>O=C(OCCC)OCC1=CN(N=N1)[C@H1]2CCC3=CC(OC)=C(OC)...</chem> | 77.90        |
| 232 | <chem>O=C(C(C1)C1)NCC1=CN(N=N1)[C@H1]2CCC3=CC(OC)=C(...</chem> | 41.81        |
| 233 | <chem>O=C(C)N[C@@H1]1CC(C2=C(C(OC)=C(OC)C=C2CC1)OCC3...</chem> | 66.26        |
| 241 | <chem>COC=C(OC)C(OC)=CCCC[C@H1](N1C=C(N=N1)COC(=O)C2...</chem> | 26.59        |
| 255 | <chem>CC(C)(C)OCNCCC(=O)NCC1=CN(N=N1)[C@@H1]2C3=CC(C...</chem> | 42.74        |
| 258 | <chem>C=1N(N=NC=1C(OC)=O)[C@H1]2CCC3=C(C(OC)=C(OC)C...</chem>  | 61.54        |
| 261 | <chem>N=NN([C@H1]1CCC2=C(C(OC)=C(OC)C(OC)=C2)C3=CC=C...</chem> | 36.59        |
| 270 | <chem>COCNCC1=CN(N=N1)[C@H1]2CCC3=CC(OC)=C(OC)C(OC)=...</chem> | 32.69        |
| 271 | <chem>CC(C)(C)OC(NCC=1N=NN(C=1)[C@H1]2CCC3=CC(OC)=C(...</chem> | 29.68        |
| 281 | <chem>C1=CN=CC=C1CN[C@H1]2CCC3=CC(OC)=C(OC)C(OC)=C3C...</chem> | 102.60       |
| 284 | <chem>NC(N=C1C=CC2)=CC=C1C3=C(OC)C(OC)=C(OC)C=C3CC[C...</chem> | 21.44        |
| 296 | <chem>N([C@H1]1CCC2=CC(OC)=C(OC)C(OC)=C2C3=CC=C(NC)C...</chem> | 20.12        |
| 309 | <chem>NN(CCO)[C@@H1]1C2=CC(C(NC)=CC=C2C3=C(OC)C(OC)=...</chem> | 40.49        |

|     |                                                   |       |
|-----|---------------------------------------------------|-------|
| 311 | NC(N=NC0CCC)C[C@H1]1C2=CC(C(NC)=CC=C2C3=C(CC1)... | 25.56 |
| 325 | N([C@H1]1CCC2=C(C(OC)=C(OC)C(OC)=C2)C3=CC=C(SC... | 59.06 |
| 335 | CC(C)(C)OC(=O)/N=C(/N[C@H1]1CCC2=C(C(OC)=C(OC)... | 74.50 |

|     | A549 [nM]   | BALB/3T3 [nM] | LoVo [nM]  | LoVo/DX [nM] | MCF-7 [nM]  | \ |
|-----|-------------|---------------|------------|--------------|-------------|---|
| 2   | 16.404839   | 39.119200     | 41.777761  | 24.143942    | 9.099151    |   |
| 9   | 13.217962   | 14.260864     | 9.635175   | 229.598512   | 7.928371    |   |
| 16  | 1681.944585 | 2890.205397   | 803.006371 | 12855.961370 | 2110.336219 |   |
| 25  | 33.218544   | 18.995642     | 9.634856   | 187.241318   | 57.881645   |   |
| 28  | 5.536264    | 11.530736     | 1.861153   | 103.052597   | 8.098140    |   |
| 31  | 6.748411    | 279.996735    | 9.635175   | 16246.471197 | 5.600000    |   |
| 51  | 982.609443  | 1238.334197   | 353.700943 | 2195.134387  | 1129.719436 |   |
| 60  | 296.687449  | 475.939825    | 259.046049 | 693.847187   | 101.723846  |   |
| 69  | 529.630535  | 505.849181    | 253.706239 | 11735.188746 | 21.123908   |   |
| 80  | 22.340738   | 7.469565      | 20.818933  | 1471.601346  | 10.474466   |   |
| 126 | 22.386835   | 41.374984     | 9.635175   | 200.432032   | 31.962900   |   |
| 130 | 7.992238    | 12.093598     | 14.174648  | 1114.393739  | 13.416494   |   |
| 136 | 61.044735   | 26.926048     | 9.635175   | 175.441092   | 9.869470    |   |
| 137 | 14.908827   | 15.993569     | 9.635175   | 1680.576300  | 8.921289    |   |
| 146 | 391.053934  | 300.023346    | 443.206857 | 3859.227656  | 125.290418  |   |
| 152 | 10.207992   | 14.512168     | 10.467981  | 171.783838   | 8.498039    |   |
| 164 | 494.148508  | 90.560531     | 83.116794  | 750.970712   | 5.256002    |   |
| 170 | 12.382034   | 11.641270     | 14.448198  | 102.472568   | 10.738748   |   |
| 173 | 20.868913   | 16.060210     | 14.174648  | 464.533245   | 14.536965   |   |
| 174 | 531.338692  | 513.912071    | 65.109453  | 330.193355   | 125.290418  |   |
| 176 | 316.540118  | 994.480486    | 265.734143 | 17945.838427 | 1055.562319 |   |
| 178 | 1963.484234 | 2890.205397   | 803.006371 | 12855.961370 | 2110.336219 |   |
| 181 | 1772.816249 | 5522.772718   | 717.774803 | 1553.425204  | 4524.591036 |   |
| 182 | 1077.713531 | 368.507201    | 237.556250 | 2051.494925  | 497.112620  |   |
| 185 | 7.018461    | 12.196628     | 7.361318   | 2427.856798  | 2.976257    |   |
| 189 | 26.301301   | 36.613507     | 9.634856   | 130.118997   | 25.543106   |   |
| 195 | 5.413134    | 12.419313     | 36.306653  | 136.685884   | 5.994254    |   |
| 200 | 1363.359377 | 1421.011999   | 188.272301 | 13148.227551 | 4259.023504 |   |
| 206 | 10.421510   | 12.028252     | 25.783470  | 1581.577231  | 5.256002    |   |
| 224 | 31.601559   | 23.170112     | 9.104401   | 1130.556772  | 52.560022   |   |
| 226 | 955.969641  | 787.317900    | 202.638588 | 4289.948579  | 226.520273  |   |
| 228 | 77.838408   | 397.581054    | 11.866527  | 1732.985256  | 107.539405  |   |
| 232 | 8.381523    | 15.400336     | 7.297576   | 1207.120828  | 6.155925    |   |
| 233 | 391.022971  | 56.890864     | 16.674135  | 136.860581   | 12.198248   |   |
| 241 | 215.275841  | 36.603252     | 13.491703  | 1064.762116  | 21.351236   |   |
| 255 | 17.986795   | 37.001121     | 7.297576   | 809.375787   | 30.162086   |   |
| 258 | 39.978429   | 128.326379    | 25.620457  | 662.578905   | 25.105421   |   |
| 261 | 540.390454  | 180.550219    | 102.812412 | 1491.681105  | 11.323713   |   |
| 270 | 10.622728   | 18.973084     | 6.460893   | 212.139231   | 14.590242   |   |
| 271 | 11.815905   | 16.030302     | 8.869165   | 1783.604598  | 13.904107   |   |
| 281 | 13.819017   | 14.748669     | 9.635175   | 167.127833   | 5.400000    |   |
| 284 | 93.417816   | 124.794930    | 9.635175   | 21333.691258 | 111.536289  |   |

|     |            |            |            |              |           |
|-----|------------|------------|------------|--------------|-----------|
| 296 | 16.155076  | 13.007130  | 1.861153   | 52.778252    | 8.476131  |
| 309 | 15.072236  | 14.600783  | 11.542807  | 1436.190429  | 8.357629  |
| 311 | 7.715502   | 28.126916  | 6.460893   | 969.121368   | 9.869470  |
| 325 | 12.260896  | 12.654742  | 10.467981  | 49.329453    | 8.498039  |
| 335 | 738.759051 | 483.152174 | 164.873587 | 10571.477341 | 45.510081 |

|     | RI LoVo | SI BALB3/T3 (A549) | SI BALB3/T3 (LoVo) | SI BALB3/T3 (LoVo/DX) | \ |
|-----|---------|--------------------|--------------------|-----------------------|---|
| 2   | 0.58    | 2.38               | 0.94               | 1.62                  |   |
| 9   | 23.83   | 1.08               | 1.48               | 0.06                  |   |
| 16  | 16.01   | 1.72               | 3.60               | 0.22                  |   |
| 25  | 19.43   | 0.57               | 1.97               | 0.10                  |   |
| 28  | 55.37   | 2.08               | 6.20               | 0.11                  |   |
| 31  | 1686.16 | 41.49              | 29.06              | 0.02                  |   |
| 51  | 6.21    | 1.26               | 3.50               | 0.56                  |   |
| 60  | 2.68    | 1.60               | 1.84               | 0.69                  |   |
| 69  | 46.26   | 0.96               | 1.99               | 0.04                  |   |
| 80  | 70.69   | 0.33               | 0.36               | 0.01                  |   |
| 126 | 20.80   | 1.85               | 4.29               | 0.21                  |   |
| 130 | 78.62   | 1.51               | 0.85               | 0.01                  |   |
| 136 | 18.21   | 0.44               | 2.79               | 0.15                  |   |
| 137 | 174.42  | 1.07               | 1.66               | 0.01                  |   |
| 146 | 8.71    | 0.77               | 0.68               | 0.08                  |   |
| 152 | 16.41   | 1.42               | 1.39               | 0.08                  |   |
| 164 | 9.04    | 0.18               | 1.09               | 0.12                  |   |
| 170 | 7.09    | 0.94               | 0.81               | 0.11                  |   |
| 173 | 32.77   | 0.77               | 1.13               | 0.03                  |   |
| 174 | 5.07    | 0.97               | 7.89               | 1.56                  |   |
| 176 | 67.53   | 3.14               | 3.74               | 0.06                  |   |
| 178 | 16.01   | 1.47               | 3.60               | 0.22                  |   |
| 181 | 2.16    | 3.12               | 7.69               | 3.56                  |   |
| 182 | 8.64    | 0.34               | 1.55               | 0.18                  |   |
| 185 | 329.81  | 1.74               | 1.66               | 0.01                  |   |
| 189 | 13.51   | 1.39               | 3.80               | 0.28                  |   |
| 195 | 3.76    | 2.29               | 0.34               | 0.09                  |   |
| 200 | 69.84   | 1.04               | 7.55               | 0.11                  |   |
| 206 | 61.34   | 1.15               | 0.47               | 0.01                  |   |
| 224 | 124.18  | 0.73               | 2.54               | 0.02                  |   |
| 226 | 21.17   | 0.82               | 3.89               | 0.18                  |   |
| 228 | 146.04  | 5.11               | 33.50              | 0.23                  |   |
| 232 | 165.41  | 1.84               | 2.11               | 0.01                  |   |
| 233 | 8.21    | 0.15               | 3.41               | 0.42                  |   |
| 241 | 78.92   | 0.17               | 2.71               | 0.03                  |   |
| 255 | 110.91  | 2.06               | 5.07               | 0.05                  |   |
| 258 | 25.86   | 3.21               | 5.01               | 0.19                  |   |
| 261 | 14.51   | 0.33               | 1.76               | 0.12                  |   |
| 270 | 32.83   | 1.79               | 2.94               | 0.09                  |   |
| 271 | 201.10  | 1.36               | 1.81               | 0.01                  |   |

|     |         |      |       |      |
|-----|---------|------|-------|------|
| 281 | 17.35   | 1.07 | 1.53  | 0.09 |
| 284 | 2214.15 | 1.34 | 12.95 | 0.01 |
| 296 | 28.36   | 0.81 | 6.99  | 0.25 |
| 309 | 124.42  | 0.97 | 1.26  | 0.01 |
| 311 | 150.00  | 3.65 | 4.35  | 0.03 |
| 325 | 4.71    | 1.03 | 1.21  | 0.26 |
| 335 | 64.12   | 0.65 | 2.93  | 0.05 |

|     | SI BALB3/T3 (MCF-7) | Affinity to 1SA0 [kcal/mol] |
|-----|---------------------|-----------------------------|
| 2   | 4.30                | -8.4                        |
| 9   | 1.80                | -8.3                        |
| 16  | 1.37                | -8.4                        |
| 25  | 0.33                | -8.3                        |
| 28  | 1.42                | -8.5                        |
| 31  | 50.00               | -8.3                        |
| 51  | 1.10                | -8.5                        |
| 60  | 4.68                | -8.5                        |
| 69  | 23.95               | -8.5                        |
| 80  | 0.71                | -8.5                        |
| 126 | 1.29                | -8.4                        |
| 130 | 0.90                | -8.3                        |
| 136 | 2.73                | -8.4                        |
| 137 | 1.79                | -8.3                        |
| 146 | 2.39                | -8.3                        |
| 152 | 1.71                | -8.3                        |
| 164 | 17.23               | -8.4                        |
| 170 | 1.08                | -8.5                        |
| 173 | 1.10                | -8.3                        |
| 174 | 4.10                | -8.5                        |
| 176 | 0.94                | -8.5                        |
| 178 | 1.37                | -8.5                        |
| 181 | 1.22                | -8.5                        |
| 182 | 0.74                | -8.4                        |
| 185 | 4.10                | -8.3                        |
| 189 | 1.43                | -8.5                        |
| 195 | 2.07                | -8.3                        |
| 200 | 0.33                | -8.4                        |
| 206 | 2.29                | -8.4                        |
| 224 | 0.44                | -8.4                        |
| 226 | 3.48                | -8.5                        |
| 228 | 3.70                | -8.3                        |
| 232 | 2.50                | -8.5                        |
| 233 | 4.66                | -8.3                        |
| 241 | 1.71                | -8.5                        |
| 255 | 1.23                | -8.5                        |
| 258 | 5.11                | -8.3                        |
| 261 | 15.94               | -8.3                        |

|     |       |      |
|-----|-------|------|
| 270 | 1.30  | -8.5 |
| 271 | 1.15  | -8.3 |
| 281 | 2.73  | -8.4 |
| 284 | 1.12  | -8.5 |
| 296 | 1.53  | -8.3 |
| 309 | 1.75  | -8.3 |
| 311 | 2.85  | -8.3 |
| 325 | 1.49  | -8.3 |
| 335 | 10.62 | -8.5 |

```
[ ]:
```

```
[17]: higher_aff = dock_res[dock_res['Affinity to 1SAO [kcal/mol]'] < -8.6]
len(higher_aff)
```

```
[17]: 78
```

```
[18]: lower_aff = dock_res[dock_res['Affinity to 1SAO [kcal/mol]'] > -8.2]
len(lower_aff)
```

```
[18]: 131
```

```
[ ]:
```



# Notebook

January 18, 2024

## 1 File 55

```
[1]: import pandas as pd

from sklearn.model_selection import train_test_split

import joblib

from sklearn.metrics import r2_score, mean_squared_error
import math

import numpy as np
```

```
[2]: def transform(target_val):
    transformed = []
    for element in target_val:
        transformed.append(-1.0 * np.log10(element/1000000000))
    return transformed

def inverse_transform(transformed_values):
    inversed = []
    for element in transformed_values:
        inversed.append(np.power(10,-element)*1000000000)
    return inversed
```

```
[3]: smiles_df = pd.read_excel('../Data/Kolchicyna_prepared_data.xlsx')
```

```
[4]: smiles_df.head()
```

```
[4]: Unnamed: 0          Publication DOI \
0          0  https://doi.org/10.1016/j.bmcl.2021.128382
1          1  https://doi.org/10.1016/j.bmcl.2021.128382
2          2  https://doi.org/10.1016/j.bmcl.2021.128382
3          3  https://doi.org/10.1016/j.bmcl.2021.128382
4          4  https://doi.org/10.1016/j.bmcl.2021.128382

Number of compound in publication \
0          1
```

|   |   |
|---|---|
| 1 | 2 |
| 2 | 3 |
| 3 | 4 |
| 4 | 5 |

|   | SMILES                                                         | Activity [nM] | A549 \ |
|---|----------------------------------------------------------------|---------------|--------|
| 0 | <chem>C0c2c3C1=CC=C(SC)C(=O)C=C1[C@H](CCc3cc(OC)c2OC...</chem> | Activity [nM] | 10,8   |
| 1 | <chem>C0c2c3C1=CC=C(SC)C(=O)C=C1[C@H](CCc3cc(OC)c2OC...</chem> | Activity [nM] | 11,6   |
| 2 | <chem>C0c2c3C1=CC=C(SC)C(=O)C=C1[C@H](CCc3cc(OC)c2OC...</chem> | Activity [nM] | 10,9   |
| 3 | <chem>CC(C)CN[C@H]2CCc3cc(OC)c(OC)c(OC)c3C1=CC=C(SC)...</chem> | Activity [nM] | 10,5   |
| 4 | <chem>C0c2c3C1=CC=C(SC)C(=O)C=C1[C@H](CCc3cc(OC)c2OC...</chem> | Activity [nM] | 89,5   |

|   | MCF-7 | LoVo | LoVo/DX | BALB/3T3 | A549_float | MCF-7_float | LoVo_float \ |
|---|-------|------|---------|----------|------------|-------------|--------------|
| 0 | 10,3  | 6,5  | 54,9    | 10,2     | 10.8       | 10.3        | 6.5          |
| 1 | 12,0  | 8,5  | 31.1    | 14.3     | 11.6       | 12.0        | 8.5          |
| 2 | 12,2  | 8,8  | 17,9    | 11,7     | 10.9       | 12.2        | 8.8          |
| 3 | 11,3  | 8,5  | 10,2    | 11,0     | 10.5       | 11.3        | 8.5          |
| 4 | 92,7  | 52,8 | 77,8    | 99,4     | 89.5       | 92.7        | 52.8         |

|   | LoVo/DX_float | BALB/3T3_float |
|---|---------------|----------------|
| 0 | 54.9          | 10.2           |
| 1 | 31.1          | 14.3           |
| 2 | 17.9          | 11.7           |
| 3 | 10.2          | 11.0           |
| 4 | 77.8          | 99.4           |

```
[5]: molecular_descriptors = pd.read_excel('../Data/Kolchicyna_machine_learning.
      ↪xlsx')
```

```
[6]: molecular_descriptors.head()
```

```
[6]: Unnamed: 0      AATSOZ  AATSOare  AATSOd  AATSOdv      AATSOi  AATSOm \
0          0  25.090909  6.046518  3.109091  6.662626  160.775045  99.075564
1          1  24.448276  6.008422  3.051724  6.386973  161.021674  96.473315
2          2  23.868852  5.974074  3.000000  6.138434  161.244045  94.127025
3          3  23.868852  5.974074  3.032787  6.171220  161.244045  94.127025
4          4  23.343750  5.942945  2.953125  5.913194  161.445569  92.000700
```

|   | AATSOp   | AATSOpe  | AATSOs   | ... | A549_float | MCF-7_float | LoVo_float \ |
|---|----------|----------|----------|-----|------------|-------------|--------------|
| 0 | 1.555512 | 6.126680 | 3.435416 | ... | 10.8       | 10.3        | 6.5          |
| 1 | 1.538471 | 6.088791 | 3.330998 | ... | 11.6       | 12.0        | 8.5          |
| 2 | 1.523105 | 6.054630 | 3.236850 | ... | 10.9       | 12.2        | 8.8          |
| 3 | 1.523105 | 6.054630 | 3.257798 | ... | 10.5       | 11.3        | 8.5          |
| 4 | 1.509180 | 6.023670 | 3.151529 | ... | 89.5       | 92.7        | 52.8         |

|   | LoVo/DX_float | BALB/3T3_float | A549_float_transformed \ |
|---|---------------|----------------|--------------------------|
| 0 | 54.9          | 10.2           | 7.966576                 |

|   |      |      |          |
|---|------|------|----------|
| 1 | 31.1 | 14.3 | 7.935542 |
| 2 | 17.9 | 11.7 | 7.962574 |
| 3 | 10.2 | 11.0 | 7.978811 |
| 4 | 77.8 | 99.4 | 7.048177 |

|   | MCF-7_float_transformed | LoVo_float_transformed | LoVo/DX_float_transformed \ |
|---|-------------------------|------------------------|-----------------------------|
| 0 | 7.987163                | 8.187087               | 7.260428                    |
| 1 | 7.920819                | 8.070581               | 7.507240                    |
| 2 | 7.913640                | 8.055517               | 7.747147                    |
| 3 | 7.946922                | 8.070581               | 7.991400                    |
| 4 | 7.032920                | 7.277366               | 7.109020                    |

|   | BALB/3T3_float_transformed |
|---|----------------------------|
| 0 | 7.991400                   |
| 1 | 7.844664                   |
| 2 | 7.931814                   |
| 3 | 7.958607                   |
| 4 | 7.002614                   |

[5 rows x 1222 columns]

```
[7]: frames = [smiles_df['SMILES'], molecular_descriptors]
res = pd.concat(frames, axis=1)
res = res.drop(['Unnamed: 0'], axis=1)
```

```
[8]: res
```

|     | SMILES                                            | AATSOZ    | AATSOare \ |
|-----|---------------------------------------------------|-----------|------------|
| 0   | COc2c3C1=CC=C(SC)C(=O)C=C1[C@H](CCc3cc(OC)c2OC... | 25.090909 | 6.046518   |
| 1   | COc2c3C1=CC=C(SC)C(=O)C=C1[C@H](CCc3cc(OC)c2OC... | 24.448276 | 6.008422   |
| 2   | COc2c3C1=CC=C(SC)C(=O)C=C1[C@H](CCc3cc(OC)c2OC... | 23.868852 | 5.974074   |
| 3   | CC(C)CN[C@H]2CCc3cc(OC)c(OC)c(OC)c3C1=CC=C(SC)... | 23.868852 | 5.974074   |
| 4   | COc2c3C1=CC=C(SC)C(=O)C=C1[C@H](CCc3cc(OC)c2OC... | 23.343750 | 5.942945   |
| ... | ...                                               | ...       | ...        |
| 115 | FC(F)(F)c1ccc(cc1)NC(=S)N[C@H]3CCc4cc(OC)c(OC)... | 28.925373 | 6.629527   |
| 116 | O[C@@H](CNC(=S)N[C@H]2CCc3cc(OC)c(OC)c(OC)c3C1... | 24.307692 | 6.247564   |
| 117 | OC[C@@H](O)[C@@H](O)[C@H](O)[C@@H](O)CNC(=S)N[... | 25.818182 | 6.393614   |
| 118 | CC(C)(C)OC(=O)\N=C(/NC(=O)OC(C)(C)C)N[C@H]2CCc... | 21.952941 | 6.267407   |
| 119 | N=C(N)N[C@H]2CCc3cc(OC)c(OC)c(OC)c3C1=CC=C(NC)... | 22.436364 | 6.250720   |

  

|     | AATSOd   | AATSOdv  | AATSOi     | AATSOm    | AATSOp   | AATSOpe  | AATSOs \ |
|-----|----------|----------|------------|-----------|----------|----------|----------|
| 0   | 3.109091 | 6.662626 | 160.775045 | 99.075564 | 1.555512 | 6.126680 | 3.435416 |
| 1   | 3.051724 | 6.386973 | 161.021674 | 96.473315 | 1.538471 | 6.088791 | 3.330998 |
| 2   | 3.000000 | 6.138434 | 161.244045 | 94.127025 | 1.523105 | 6.054630 | 3.236850 |
| 3   | 3.032787 | 6.171220 | 161.244045 | 94.127025 | 1.523105 | 6.054630 | 3.257798 |
| 4   | 2.953125 | 5.913194 | 161.445569 | 92.000700 | 1.509180 | 6.023670 | 3.151529 |
| ... | ...      | ...      | ...        | ...       | ...      | ...      | ...      |

|     |          |          |            |            |          |          |          |
|-----|----------|----------|------------|------------|----------|----------|----------|
| 115 | 3.492537 | 9.558872 | 165.991839 | 116.283088 | 1.583312 | 6.669057 | 6.199313 |
| 116 | 3.241758 | 7.235653 | 163.907908 | 95.896512  | 1.427144 | 6.299627 | 3.659034 |
| 117 | 3.103896 | 7.512266 | 164.617043 | 101.985317 | 1.423114 | 6.435469 | 5.205806 |
| 118 | 3.105882 | 7.623529 | 165.008670 | 86.439890  | 1.354297 | 6.311679 | 4.432190 |
| 119 | 3.200000 | 7.600000 | 164.678288 | 88.447644  | 1.409812 | 6.303515 | 4.205556 |

|     | ... | A549_float | MCF-7_float | LoVo_float | LoVo/DX_float | BALB/3T3_float | \ |
|-----|-----|------------|-------------|------------|---------------|----------------|---|
| 0   | ... | 10.8       | 10.3        | 6.5        | 54.9          | 10.2           |   |
| 1   | ... | 11.6       | 12.0        | 8.5        | 31.1          | 14.3           |   |
| 2   | ... | 10.9       | 12.2        | 8.8        | 17.9          | 11.7           |   |
| 3   | ... | 10.5       | 11.3        | 8.5        | 10.2          | 11.0           |   |
| 4   | ... | 89.5       | 92.7        | 52.8       | 77.8          | 99.4           |   |
| ..  | ... | ...        | ...         | ...        | ...           | ...            |   |
| 115 | ... | 86.0       | 120.0       | 54.0       | 2700.0        | 67.0           |   |
| 116 | ... | 70.0       | 15.0        | 32.0       | 5300.0        | 440.0          |   |
| 117 | ... | 930.0      | 1200.0      | 680.0      | 6600.0        | 1300.0         |   |
| 118 | ... | 850.0      | 940.0       | 500.0      | 5900.0        | 690.0          |   |
| 119 | ... | 740.0      | 760.0       | 920.0      | 86000.0       | 1800.0         |   |

|     | A549_float_transformed | MCF-7_float_transformed | LoVo_float_transformed | \        |
|-----|------------------------|-------------------------|------------------------|----------|
| 0   | 7.966576               |                         | 7.987163               | 8.187087 |
| 1   | 7.935542               |                         | 7.920819               | 8.070581 |
| 2   | 7.962574               |                         | 7.913640               | 8.055517 |
| 3   | 7.978811               |                         | 7.946922               | 8.070581 |
| 4   | 7.048177               |                         | 7.032920               | 7.277366 |
| ..  | ...                    |                         | ...                    | ...      |
| 115 | 7.065502               |                         | 6.920819               | 7.267606 |
| 116 | 7.154902               |                         | 7.823909               | 7.494850 |
| 117 | 6.031517               |                         | 5.920819               | 6.167491 |
| 118 | 6.070581               |                         | 6.026872               | 6.301030 |
| 119 | 6.130768               |                         | 6.119186               | 6.036212 |

|     | LoVo/DX_float_transformed | BALB/3T3_float_transformed |
|-----|---------------------------|----------------------------|
| 0   | 7.260428                  | 7.991400                   |
| 1   | 7.507240                  | 7.844664                   |
| 2   | 7.747147                  | 7.931814                   |
| 3   | 7.991400                  | 7.958607                   |
| 4   | 7.109020                  | 7.002614                   |
| ..  | ...                       | ...                        |
| 115 | 5.568636                  | 7.173925                   |
| 116 | 5.275724                  | 6.356547                   |
| 117 | 5.180456                  | 5.886057                   |
| 118 | 5.229148                  | 6.161151                   |
| 119 | 4.065502                  | 5.744727                   |

[120 rows x 1222 columns]

```
[9]: ## load models
model_A549 = joblib.load('Random_forest/random_forest_model_17_estimators_A549.
↳joblib') #Random state 15
model_BALB3_t3 = joblib.load('Random_forest/
↳random_forest_model_19_estimators_BALB_3T3.joblib') #Random state 42
model_LoVo_DX = joblib.load('Random_forest/
↳random_forest_model_14_estimators_LoVo_DX.joblib') #Random state 28
model_LoVo = joblib.load('Random_forest/random_forest_model_18_estimators_LoVo.
↳joblib') #Random state 42
model_MCF_7 = joblib.load('Random_forest/random_forest_model_3_estimators_MCF-7.
↳joblib') #Random state 15
```

## 2 Construct a dataframe for each Random Seed and predict values, additionally calculate R score and RMSE...

### 2.1 A549

```
[10]: list(model_A549.feature_names_in_)
```

```
[10]: ['AMID_0', 'EState_VSA5', 'MDEO-12', 'SaasC', 'VSA_EState5']
```

```
[11]: res.columns[0:-9]
```

```
[11]: Index(['SMILES', 'AATSOZ', 'AATS0are', 'AATS0d', 'AATS0dv', 'AATS0i', 'AATS0m',
'AATS0p', 'AATS0pe', 'AATS0s',
...
'piPC10', 'piPC2', 'piPC3', 'piPC4', 'piPC5', 'piPC6', 'piPC7', 'piPC8',
'piPC9', 'A549_float'],
dtype='object', length=1213)
```

```
[12]: X_train, X_test, y_train, y_test = train_test_split(res[res.columns[0:-9]],
↳res['A549_float_transformed'],
test_size=0.15,
↳random_state=15)

X_train['predicted A549 transformed IC50'] = model_A549.
↳predict(X_train[list(model_A549.feature_names_in_)])
X_train['observed A549 transformed IC50'] = y_train
X_train['predicted A549 IC50'] = inverse_transform(X_train['predicted A549_
↳transformed IC50'])
X_test['predicted A549 transformed IC50'] = model_A549.
↳predict(X_test[list(model_A549.feature_names_in_)])
X_test['observed A549 transformed IC50'] = y_test
X_test['predicted A549 IC50'] = inverse_transform(X_test['predicted A549_
↳transformed IC50'])
```

```

print('Train R score: '+str(math.sqrt(r2_score(X_train['observed A549_
↳transformed IC50'], X_train['predicted A549 transformed IC50']))))
print('Test R score: '+str(math.sqrt(r2_score(X_test['observed A549 transformed_
↳IC50'], X_test['predicted A549 transformed IC50']))))
print('Train RMSE score: '+str(math.sqrt(mean_squared_error(X_train['observed_
↳A549 transformed IC50'], X_train['predicted A549 transformed IC50']))))
print('Test RMSE score: '+str(math.sqrt(mean_squared_error(X_test['observed_
↳A549 transformed IC50'], X_test['predicted A549 transformed IC50']))))

```

Train R score: 0.960591935079034  
 Test R score: 0.8620618597285548  
 Train RMSE score: 0.2594924364766403  
 Test RMSE score: 0.5253556041537444

```

[13]: with pd.ExcelWriter("../Data/A549_random_state_15.xlsx") as writer:
      X_train.to_excel(writer, sheet_name="Train", index=True)
      X_test.to_excel(writer, sheet_name="Test", index=True)

```

```

[14]: X_train, X_test, y_train, y_test = train_test_split(res[res.columns[0:-9]],
                                                         ↳
                                                         test_size=0.15,↳
                                                         ↳random_state=28)

X_train['predicted A549 transformed IC50'] = model_A549.
↳predict(X_train[list(model_A549.feature_names_in_)])
X_train['observed A549 transformed IC50'] = y_train
X_train['predicted A549 IC50'] = inverse_transform(X_train['predicted A549_
↳transformed IC50'])
X_test['predicted A549 transformed IC50'] = model_A549.
↳predict(X_test[list(model_A549.feature_names_in_)])
X_test['observed A549 transformed IC50'] = y_test
X_test['predicted A549 IC50'] = inverse_transform(X_test['predicted A549_
↳transformed IC50'])

#print('Train R score: '+str(math.sqrt(r2_score(X_train['observed A549_
↳transformed IC50'], X_train['predicted A549 transformed IC50']))))
#print('Test R score: '+str(math.sqrt(r2_score(X_test['observed A549_
↳transformed IC50'], X_test['predicted A549 transformed IC50']))))
#print('Train RMSE score: '+str(math.sqrt(mean_squared_error(X_train['observed_
↳A549 transformed IC50'], X_train['predicted A549 transformed IC50']))))
#print('Test RMSE score: '+str(math.sqrt(mean_squared_error(X_test['observed_
↳A549 transformed IC50'], X_test['predicted A549 transformed IC50']))))

```

```
[15]: with pd.ExcelWriter("../Data/A549_random_state_28.xlsx") as writer:
        X_train.to_excel(writer, sheet_name="Train", index=True)
        X_test.to_excel(writer, sheet_name="Test", index=True)

[16]: X_train, X_test, y_train, y_test = train_test_split(res[res.columns[0:-9]],
                                                    ↵
                                                    ↵res['A549_float_transformed'],
                                                    test_size=0.15,↵
                                                    ↵random_state=42)

X_train['predicted A549 transformed IC50'] = model_A549.
    ↵predict(X_train[list(model_A549.feature_names_in_)])
X_train['observed A549 transformed IC50'] = y_train
X_train['predicted A549 IC50'] = inverse_transform(X_train['predicted A549↵
    ↵transformed IC50'])
X_test['predicted A549 transformed IC50'] = model_A549.
    ↵predict(X_test[list(model_A549.feature_names_in_)])
X_test['observed A549 transformed IC50'] = y_test
X_test['predicted A549 IC50'] = inverse_transform(X_test['predicted A549↵
    ↵transformed IC50'])

#print('Train R score: '+str(math.sqrt(r2_score(X_train['observed A549↵
    ↵transformed IC50'], X_train['predicted A549 transformed IC50'])))
#print('Test R score: '+str(math.sqrt(r2_score(X_test['observed A549↵
    ↵transformed IC50'], X_test['predicted A549 transformed IC50'])))
#print('Train RMSE score: '+str(math.sqrt(mean_squared_error(X_train['observed↵
    ↵A549 transformed IC50'], X_train['predicted A549 transformed IC50'])))
#print('Test RMSE score: '+str(math.sqrt(mean_squared_error(X_test['observed↵
    ↵A549 transformed IC50'], X_test['predicted A549 transformed IC50'])))

[17]: with pd.ExcelWriter("../Data/A549_random_state_42.xlsx") as writer:
        X_train.to_excel(writer, sheet_name="Train", index=True)
        X_test.to_excel(writer, sheet_name="Test", index=True)
```

## 2.2 BALB 3T3

```
[18]: list(model_BALB3_t3.feature_names_in_)

[18]: ['AMID_0', 'EState_VSA5', 'GATS2c', 'MDE0-12', 'NdssC', 'VSA_EState5']

[19]: res.columns[0:-5]

[19]: Index(['SMILES', 'AATSOZ', 'AATS0are', 'AATS0d', 'AATS0dv', 'AATS0i', 'AATS0m',
          'AATS0p', 'AATS0pe', 'AATS0s',
          ...,
          'piPC5', 'piPC6', 'piPC7', 'piPC8', 'piPC9', 'A549_float',
          'MCF-7_float', 'LoVo_float', 'LoVo/DX_float', 'BALB/3T3_float'],
```

```
dtype='object', length=1217)
```

```
[20]: X_train, X_test, y_train, y_test = train_test_split(res[res.columns[0:-5]],
                                                         res['BALB/
                                                         ↪3T3_float_transformed'],
                                                         test_size=0.15,
                                                         ↪random_state=15)

X_train['predicted BALB 3T3 transformed IC50'] = model_BALB3_t3.
    ↪predict(X_train[list(model_BALB3_t3.feature_names_in_)])
X_train['observed BALB 3T3 transformed IC50'] = y_train
X_train['predicted BALB 3T3 IC50'] = inverse_transform(X_train['predicted BALB_
    ↪3T3 transformed IC50'])
X_test['predicted BALB 3T3 transformed IC50'] = model_BALB3_t3.
    ↪predict(X_test[list(model_BALB3_t3.feature_names_in_)])
X_test['observed BALB 3T3 transformed IC50'] = y_test
X_test['predicted BALB 3T3 IC50'] = inverse_transform(X_test['predicted BALB_
    ↪3T3 transformed IC50'])

print('Train R score: '+str(math.sqrt(r2_score(X_train['observed BALB 3T3_
    ↪transformed IC50'], X_train['predicted BALB 3T3 transformed IC50']))))
print('Test R score: '+str(math.sqrt(r2_score(X_test['observed BALB 3T3_
    ↪transformed IC50'], X_test['predicted BALB 3T3 transformed IC50']))))
print('Train RMSE score: '+str(math.sqrt(mean_squared_error(X_train['observed_
    ↪BALB 3T3 transformed IC50'], X_train['predicted BALB 3T3 transformed_
    ↪IC50']))))
print('Test RMSE score: '+str(math.sqrt(mean_squared_error(X_test['observed_
    ↪BALB 3T3 transformed IC50'], X_test['predicted BALB 3T3 transformed_
    ↪IC50']))))
```

Train R score: 0.9656538230216772

Test R score: 0.8642992780332693

Train RMSE score: 0.22547718186980922

Test RMSE score: 0.46260702873007903

```
[21]: with pd.ExcelWriter("../Data/BALB_3T3_random_state_15.xlsx") as writer:
        X_train.to_excel(writer, sheet_name="Train", index=True)
        X_test.to_excel(writer, sheet_name="Test", index=True)
```

```
[22]: X_train, X_test, y_train, y_test = train_test_split(res[res.columns[0:-5]],
                                                         res['BALB/
                                                         ↪3T3_float_transformed'],
                                                         test_size=0.15,
                                                         ↪random_state=28)

X_train['predicted BALB 3T3 transformed IC50'] = model_BALB3_t3.
    ↪predict(X_train[list(model_BALB3_t3.feature_names_in_)])
```



```

X_train['observed BALB 3T3 transformed IC50'] = y_train
X_train['predicted BALB 3T3 IC50'] = inverse_transform(X_train['predicted BALB_
↳3T3 transformed IC50'])
X_test['predicted BALB 3T3 transformed IC50'] = model_BALB3_t3.
↳predict(X_test[list(model_BALB3_t3.feature_names_in_)])
X_test['observed BALB 3T3 transformed IC50'] = y_test
X_test['predicted BALB 3T3 IC50'] = inverse_transform(X_test['predicted BALB_
↳3T3 transformed IC50'])

#print('Train R score: '+str(math.sqrt(r2_score(X_train['observed BALB 3T3_
↳transformed IC50'], X_train['predicted BALB 3T3 transformed IC50']))))
#print('Test R score: '+str(math.sqrt(r2_score(X_test['observed BALB 3T3_
↳transformed IC50'], X_test['predicted BALB 3T3 transformed IC50']))))
#print('Train RMSE score: '+str(math.sqrt(mean_squared_error(X_train['observed_
↳BALB 3T3 transformed IC50'], X_train['predicted BALB 3T3 transformed_
↳IC50']))))
#print('Test RMSE score: '+str(math.sqrt(mean_squared_error(X_test['observed_
↳BALB 3T3 transformed IC50'], X_test['predicted BALB 3T3 transformed_
↳IC50']))))

```

```

[23]: with pd.ExcelWriter("../Data/BALB_3T3_random_state_28.xlsx") as writer:
        X_train.to_excel(writer, sheet_name="Train", index=True)
        X_test.to_excel(writer, sheet_name="Test", index=True)

```

```

[24]: X_train, X_test, y_train, y_test = train_test_split(res[res.columns[0:-5]],
                                                         res['BALB/
↳3T3_float_transformed'],
                                                         test_size=0.15,
↳random_state=42)

X_train['predicted BALB 3T3 transformed IC50'] = model_BALB3_t3.
↳predict(X_train[list(model_BALB3_t3.feature_names_in_)])
X_train['observed BALB 3T3 transformed IC50'] = y_train
X_train['predicted BALB 3T3 IC50'] = inverse_transform(X_train['predicted BALB_
↳3T3 transformed IC50'])
X_test['predicted BALB 3T3 transformed IC50'] = model_BALB3_t3.
↳predict(X_test[list(model_BALB3_t3.feature_names_in_)])
X_test['observed BALB 3T3 transformed IC50'] = y_test
X_test['predicted BALB 3T3 IC50'] = inverse_transform(X_test['predicted BALB_
↳3T3 transformed IC50'])

#print('Train R score: '+str(math.sqrt(r2_score(X_train['observed BALB 3T3_
↳transformed IC50'], X_train['predicted BALB 3T3 transformed IC50']))))
#print('Test R score: '+str(math.sqrt(r2_score(X_test['observed BALB 3T3_
↳transformed IC50'], X_test['predicted BALB 3T3 transformed IC50']))))

```

```
#print('Train RMSE score: '+str(math.sqrt(mean_squared_error(X_train['observed_
↳BALB 3T3 transformed IC50'], X_train['predicted BALB 3T3 transformed_
↳IC50']))))
#print('Test RMSE score: '+str(math.sqrt(mean_squared_error(X_test['observed_
↳BALB 3T3 transformed IC50'], X_test['predicted BALB 3T3 transformed_
↳IC50']))))
```

```
[25]: with pd.ExcelWriter("../Data/BALB_3T3_random_state_42.xlsx") as writer:
        X_train.to_excel(writer, sheet_name="Train", index=True)
        X_test.to_excel(writer, sheet_name="Test", index=True)
```

## 2.3 LoVo/dx

```
[26]: list(model_LoVo_DX.feature_names_in_)
```

```
[26]: ['GATS2c', 'MATS2c', 'NdssC', 'RNCG', 'TopoPSA(NO)']
```

```
[27]: res.columns[0:-6]
```

```
[27]: Index(['SMILES', 'AATS0Z', 'AATS0are', 'AATS0d', 'AATS0dv', 'AATS0i', 'AATS0m',
        'AATS0p', 'AATS0pe', 'AATS0s',
        ...,
        'piPC4', 'piPC5', 'piPC6', 'piPC7', 'piPC8', 'piPC9', 'A549_float',
        'MCF-7_float', 'LoVo_float', 'LoVo/DX_float'],
        dtype='object', length=1216)
```

```
[28]: print(res.shape)
res_ = res.dropna()
res_.shape
```

```
(120, 1222)
```

```
[28]: (106, 1222)
```

```
[29]: X_train, X_test, y_train, y_test = train_test_split(res_[res_.columns[0:-6]],
        res_['LoVo/
↳DX_float_transformed'],
        test_size=0.15,
↳random_state=15)

X_train['predicted LoVo/DX transformed IC50'] = model_LoVo_DX.
↳predict(X_train[list(model_LoVo_DX.feature_names_in_)])
X_train['observed LoVo/DX transformed IC50'] = y_train
X_train['predicted LoVo/DX IC50'] = inverse_transform(X_train['predicted LoVo/
↳DX transformed IC50'])
X_test['predicted LoVo/DX transformed IC50'] = model_LoVo_DX.
↳predict(X_test[list(model_LoVo_DX.feature_names_in_)])
```

```

X_test['observed LoVo/DX transformed IC50'] = y_test
X_test['predicted LoVo/DX IC50'] = inverse_transform(X_test['predicted LoVo/DX_
↳transformed IC50'])

#print('Train R score: '+str(math.sqrt(r2_score(X_train['observed LoVo/DX_
↳transformed IC50'], X_train['predicted LoVo/DX transformed IC50']))))
#print('Test R score: '+str(math.sqrt(r2_score(X_test['observed LoVo/DX_
↳transformed IC50'], X_test['predicted LoVo/DX transformed IC50']))))
#print('Train RMSE score: '+str(math.sqrt(mean_squared_error(X_train['observed_
↳LoVo/DX transformed IC50'], X_train['predicted LoVo/DX transformed IC50']))))
#print('Test RMSE score: '+str(math.sqrt(mean_squared_error(X_test['observed_
↳LoVo/DX transformed IC50'], X_test['predicted LoVo/DX transformed IC50']))))

```

```

[30]: with pd.ExcelWriter("../Data/LoVo_DX_random_state_15.xlsx") as writer:
        X_train.to_excel(writer, sheet_name="Train", index=True)
        X_test.to_excel(writer, sheet_name="Test", index=True)

```

```

[31]: X_train, X_test, y_train, y_test = train_test_split(res_[res_.columns[0:-6]],
                                                         res_['LoVo/
↳DX_float_transformed'],
                                                         test_size=0.15,
↳random_state=28)

X_train['predicted LoVo/DX transformed IC50'] = model_LoVo_DX.
↳predict(X_train[list(model_LoVo_DX.feature_names_in_)])
X_train['observed LoVo/DX transformed IC50'] = y_train
X_train['predicted LoVo/DX IC50'] = inverse_transform(X_train['predicted LoVo/
↳DX transformed IC50'])
X_test['predicted LoVo/DX transformed IC50'] = model_LoVo_DX.
↳predict(X_test[list(model_LoVo_DX.feature_names_in_)])
X_test['observed LoVo/DX transformed IC50'] = y_test
X_test['predicted LoVo/DX IC50'] = inverse_transform(X_test['predicted LoVo/DX_
↳transformed IC50'])

#print('Train R score: '+str(math.sqrt(r2_score(X_train['observed LoVo/DX_
↳transformed IC50'], X_train['predicted LoVo/DX transformed IC50']))))
#print('Test R score: '+str(math.sqrt(r2_score(X_test['observed LoVo/DX_
↳transformed IC50'], X_test['predicted LoVo/DX transformed IC50']))))
#print('Train RMSE score: '+str(math.sqrt(mean_squared_error(X_train['observed_
↳LoVo/DX transformed IC50'], X_train['predicted LoVo/DX transformed IC50']))))
#print('Test RMSE score: '+str(math.sqrt(mean_squared_error(X_test['observed_
↳LoVo/DX transformed IC50'], X_test['predicted LoVo/DX transformed IC50']))))

```

```

[32]: with pd.ExcelWriter("../Data/LoVo_DX_random_state_28.xlsx") as writer:
        X_train.to_excel(writer, sheet_name="Train", index=True)
        X_test.to_excel(writer, sheet_name="Test", index=True)

```

```
[33]: X_train, X_test, y_train, y_test = train_test_split(res_[res_.columns[0:-6]],
                                                    res_['LoVo/
                                                    ↪DX_float_transformed'],
                                                    test_size=0.15,
                                                    ↪random_state=42)

X_train['predicted LoVo/DX transformed IC50'] = model_LoVo_DX.
    ↪predict(X_train[list(model_LoVo_DX.feature_names_in_)])
X_train['observed LoVo/DX transformed IC50'] = y_train
X_train['predicted LoVo/DX IC50'] = inverse_transform(X_train['predicted LoVo/
    ↪DX transformed IC50'])
X_test['predicted LoVo/DX transformed IC50'] = model_LoVo_DX.
    ↪predict(X_test[list(model_LoVo_DX.feature_names_in_)])
X_test['observed LoVo/DX transformed IC50'] = y_test
X_test['predicted LoVo/DX IC50'] = inverse_transform(X_test['predicted LoVo/DX
    ↪transformed IC50'])

print('Train R score: '+str(math.sqrt(r2_score(X_train['observed LoVo/DX
    ↪transformed IC50'], X_train['predicted LoVo/DX transformed IC50']))))
print('Test R score: '+str(math.sqrt(r2_score(X_test['observed LoVo/DX
    ↪transformed IC50'], X_test['predicted LoVo/DX transformed IC50']))))
print('Train RMSE score: '+str(math.sqrt(mean_squared_error(X_train['observed
    ↪LoVo/DX transformed IC50'], X_train['predicted LoVo/DX transformed IC50']))))
print('Test RMSE score: '+str(math.sqrt(mean_squared_error(X_test['observed
    ↪LoVo/DX transformed IC50'], X_test['predicted LoVo/DX transformed IC50']))))
```

Train R score: 0.9610074984048745  
 Test R score: 0.790562123545645  
 Train RMSE score: 0.26590821262128245  
 Test RMSE score: 0.4420939409154765

```
[34]: with pd.ExcelWriter("../Data/LoVo_DX_random_state_42.xlsx") as writer:
        X_train.to_excel(writer, sheet_name="Train", index=True)
        X_test.to_excel(writer, sheet_name="Test", index=True)
```

## 2.4 LoVo

```
[35]: list(model_LoVo.feature_names_in_)
```

```
[35]: ['EState_VSA5', 'MDEO-12']
```

```
[36]: res.columns[0:-7]
```

```
[36]: Index(['SMILES', 'AATSOZ', 'AATSOare', 'AATSOd', 'AATSOdv', 'AATSOi', 'AATSOm',
        'AATSOp', 'AATSOpe', 'AATSOs',
        ...,
        'piPC3', 'piPC4', 'piPC5', 'piPC6', 'piPC7', 'piPC8', 'piPC9',
```

```
'A549_float', 'MCF-7_float', 'LoVo_float'],  
dtype='object', length=1215)
```

```
[37]: X_train, X_test, y_train, y_test = train_test_split(res.columns[0:-7]),
res['LoVo_float_transformed'],
test_size=0.15,
random_state=15)

X_train['predicted LoVo transformed IC50'] = model_LoVo.
predict(X_train[list(model_LoVo.feature_names_in_)])
X_train['observed LoVo transformed IC50'] = y_train
X_train['predicted LoVo IC50'] = inverse_transform(X_train['predicted LoVo_
transformed IC50'])

X_test['predicted LoVo transformed IC50'] = model_LoVo.
predict(X_test[list(model_LoVo.feature_names_in_)])
X_test['observed LoVo transformed IC50'] = y_test
X_test['predicted LoVo IC50'] = inverse_transform(X_test['predicted LoVo_
transformed IC50'])

#print('Train R score: '+str(math.sqrt(r2_score(X_train['observed LoVo_
transformed IC50'], X_train['predicted LoVo transformed IC50']))))
#print('Test R score: '+str(math.sqrt(r2_score(X_test['observed LoVo_
transformed IC50'], X_test['predicted LoVo transformed IC50']))))
#print('Train RMSE score: '+str(math.sqrt(mean_squared_error(X_train['observed_
LoVo transformed IC50'], X_train['predicted LoVo transformed IC50']))))
#print('Test RMSE score: '+str(math.sqrt(mean_squared_error(X_test['observed_
LoVo transformed IC50'], X_test['predicted LoVo transformed IC50']))))
```

```
[38]: with pd.ExcelWriter("../Data/LoVo_random_state_15.xlsx") as writer:
      X_train.to_excel(writer, sheet_name="Train", index=True)
      X_test.to_excel(writer, sheet_name="Test", index=True)
```

```
[39]: X_train, X_test, y_train, y_test = train_test_split(res[res.columns[0:-7]],
    ↪ res['LoVo_float_transformed'],
    ↪ test_size=0.15,
    ↪ random_state=28)

X_train['predicted LoVo transformed IC50'] = model_LoVo.
    ↪ predict(X_train[list(model_LoVo.feature_names_in_)])
X_train['observed LoVo transformed IC50'] = y_train
X_train['predicted LoVo IC50'] = inverse_transform(X_train['predicted LoVo_
    ↪ transformed IC50'])

X_test['predicted LoVo transformed IC50'] = model_LoVo.
    ↪ predict(X_test[list(model_LoVo.feature_names_in_)])
```

```

X_test['observed LoVo transformed IC50'] = y_test
X_test['predicted LoVo IC50'] = inverse_transform(X_test['predicted LoVo_
↳transformed IC50'])

print('Train R score: '+str(math.sqrt(r2_score(X_train['observed LoVo_
↳transformed IC50'], X_train['predicted LoVo transformed IC50']))))
print('Test R score: '+str(math.sqrt(r2_score(X_test['observed LoVo transformed_
↳IC50'], X_test['predicted LoVo transformed IC50']))))
print('Train RMSE score: '+str(math.sqrt(mean_squared_error(X_train['observed_
↳LoVo transformed IC50'], X_train['predicted LoVo transformed IC50']))))
print('Test RMSE score: '+str(math.sqrt(mean_squared_error(X_test['observed_
↳LoVo transformed IC50'], X_test['predicted LoVo transformed IC50']))))

```

Train R score: 0.8811267812945673  
 Test R score: 0.6572630628008767  
 Train RMSE score: 0.4438384819944741  
 Test RMSE score: 0.5047746604903675

```

[40]: with pd.ExcelWriter("../Data/LoVo_random_state_28.xlsx") as writer:
        X_train.to_excel(writer, sheet_name="Train", index=True)
        X_test.to_excel(writer, sheet_name="Test", index=True)

```

```

[41]: X_train, X_test, y_train, y_test = train_test_split(res[res.columns[0:-7]],
                                                         ↳
        res['LoVo_float_transformed'],
                                                         test_size=0.15,↳
        random_state=42)

X_train['predicted LoVo transformed IC50'] = model_LoVo.
↳predict(X_train[list(model_LoVo.feature_names_in_)])
X_train['observed LoVo transformed IC50'] = y_train
X_train['predicted LoVo IC50'] = inverse_transform(X_train['predicted LoVo_
↳transformed IC50'])
X_test['predicted LoVo transformed IC50'] = model_LoVo.
↳predict(X_test[list(model_LoVo.feature_names_in_)])
X_test['observed LoVo transformed IC50'] = y_test
X_test['predicted LoVo IC50'] = inverse_transform(X_test['predicted LoVo_
↳transformed IC50'])

#print('Train R score: '+str(math.sqrt(r2_score(X_train['observed LoVo_
↳transformed IC50'], X_train['predicted LoVo transformed IC50']))))
#print('Test R score: '+str(math.sqrt(r2_score(X_test['observed LoVo_
↳transformed IC50'], X_test['predicted LoVo transformed IC50']))))
#print('Train RMSE score: '+str(math.sqrt(mean_squared_error(X_train['observed_
↳LoVo transformed IC50'], X_train['predicted LoVo transformed IC50']))))
#print('Test RMSE score: '+str(math.sqrt(mean_squared_error(X_test['observed_
↳LoVo transformed IC50'], X_test['predicted LoVo transformed IC50']))))

```

```
[42]: with pd.ExcelWriter("../Data/LoVo_random_state_42.xlsx") as writer:
      X_train.to_excel(writer, sheet_name="Train", index=True)
      X_test.to_excel(writer, sheet_name="Test", index=True)
```

## 2.5 MCF-7

```
[43]: list(model_MCF_7.feature_names_in_)
```

```
[43]: ['AMID_0', 'EState_VSA5', 'EState_VSA6', 'MDEO-12']
```

```
[44]: res.columns[0:-8]
```

```
[44]: Index(['SMILES', 'AATSOZ', 'AATSOare', 'AATSOd', 'AATSOdv', 'AATSOi', 'AATSOm',
          'AATSOp', 'AATSOpe', 'AATSOs',
          ...,
          'piPC2', 'piPC3', 'piPC4', 'piPC5', 'piPC6', 'piPC7', 'piPC8', 'piPC9',
          'A549_float', 'MCF-7_float'],
          dtype='object', length=1214)
```

```
[45]: X_train, X_test, y_train, y_test = train_test_split(res[res.columns[0:-8]],
                                                         ↵
                                                         test_size=0.15,↵
                                                         ↵random_state=15)

X_train['predicted MCF-7 transformed IC50'] = model_MCF_7.
    ↵predict(X_train[list(model_MCF_7.feature_names_in_)])
X_train['observed MCF-7 transformed IC50'] = y_train
X_train['predicted MCF-7 IC50'] = inverse_transform(X_train['predicted MCF-7_↵
    ↵transformed IC50'])
X_test['predicted MCF-7 transformed IC50'] = model_MCF_7.
    ↵predict(X_test[list(model_MCF_7.feature_names_in_)])
X_test['observed MCF-7 transformed IC50'] = y_test
X_test['predicted MCF-7 IC50'] = inverse_transform(X_test['predicted MCF-7_↵
    ↵transformed IC50'])

print('Train R score: '+str(math.sqrt(r2_score(X_train['observed MCF-7_↵
    ↵transformed IC50'], X_train['predicted MCF-7 transformed IC50']))))
print('Test R score: '+str(math.sqrt(r2_score(X_test['observed MCF-7_↵
    ↵transformed IC50'], X_test['predicted MCF-7 transformed IC50']))))
print('Train RMSE score: '+str(math.sqrt(mean_squared_error(X_train['observed_↵
    ↵MCF-7 transformed IC50'], X_train['predicted MCF-7 transformed IC50']))))
print('Test RMSE score: '+str(math.sqrt(mean_squared_error(X_test['observed_↵
    ↵MCF-7 transformed IC50'], X_test['predicted MCF-7 transformed IC50']))))
```

Train R score: 0.85288466325432

Test R score: 0.677226040545383



Train RMSE score: 0.4524890646893892

Test RMSE score: 0.8054094630462401

```
[46]: with pd.ExcelWriter("../Data/MCF-7_random_state_15.xlsx") as writer:
        X_train.to_excel(writer, sheet_name="Train", index=True)
        X_test.to_excel(writer, sheet_name="Test", index=True)

[47]: X_train, X_test, y_train, y_test = train_test_split(res[res.columns[0:-8]],
                                                         ↵
        ↪res['LoVo_float_transformed'],
                                                         test_size=0.15,↵
        ↪random_state=28)

X_train['predicted MCF-7 transformed IC50'] = model_MCF_7.
    ↪predict(X_train[list(model_MCF_7.feature_names_in_)])
X_train['observed MCF-7 transformed IC50'] = y_train
X_train['predicted MCF-7 IC50'] = inverse_transform(X_train['predicted MCF-7↵
    ↪transformed IC50'])
X_test['predicted MCF-7 transformed IC50'] = model_MCF_7.
    ↪predict(X_test[list(model_MCF_7.feature_names_in_)])
X_test['observed MCF-7 transformed IC50'] = y_test
X_test['predicted MCF-7 IC50'] = inverse_transform(X_test['predicted MCF-7↵
    ↪transformed IC50'])

#print('Train R score: '+str(math.sqrt(r2_score(X_train['observed MCF-7↵
    ↪transformed IC50'], X_train['predicted MCF-7 transformed IC50']))))
#print('Test R score: '+str(math.sqrt(r2_score(X_test['observed MCF-7↵
    ↪transformed IC50'], X_test['predicted MCF-7 transformed IC50']))))
#print('Train RMSE score: '+str(math.sqrt(mean_squared_error(X_train['observed↵
    ↪MCF-7 transformed IC50'], X_train['predicted MCF-7 transformed IC50']))))
#print('Test RMSE score: '+str(math.sqrt(mean_squared_error(X_test['observed↵
    ↪MCF-7 transformed IC50'], X_test['predicted MCF-7 transformed IC50']))))

[48]: with pd.ExcelWriter("../Data/MCF-7_random_state_28.xlsx") as writer:
        X_train.to_excel(writer, sheet_name="Train", index=True)
        X_test.to_excel(writer, sheet_name="Test", index=True)

[49]: X_train, X_test, y_train, y_test = train_test_split(res[res.columns[0:-8]],
                                                         ↵
        ↪res['LoVo_float_transformed'],
                                                         test_size=0.15,↵
        ↪random_state=42)

X_train['predicted MCF-7 transformed IC50'] = model_MCF_7.
    ↪predict(X_train[list(model_MCF_7.feature_names_in_)])
X_train['observed MCF-7 transformed IC50'] = y_train
```



```

X_train['predicted MCF-7 IC50'] = inverse_transform(X_train['predicted MCF-7_
↳transformed IC50'])
X_test['predicted MCF-7 transformed IC50'] = model_MCF_7.
↳predict(X_test[list(model_MCF_7.feature_names_in_)])
X_test['observed MCF-7 transformed IC50'] = y_test
X_test['predicted MCF-7 IC50'] = inverse_transform(X_test['predicted MCF-7_
↳transformed IC50'])

#print('Train R score: '+str(math.sqrt(r2_score(X_train['observed MCF-7_
↳transformed IC50'], X_train['predicted MCF-7 transformed IC50']))))
#print('Test R score: '+str(math.sqrt(r2_score(X_test['observed MCF-7_
↳transformed IC50'], X_test['predicted MCF-7 transformed IC50']))))
#print('Train RMSE score: '+str(math.sqrt(mean_squared_error(X_train['observed_
↳MCF-7 transformed IC50'], X_train['predicted MCF-7 transformed IC50']))))
#print('Test RMSE score: '+str(math.sqrt(mean_squared_error(X_test['observed_
↳MCF-7 transformed IC50'], X_test['predicted MCF-7 transformed IC50']))))

```

```

[50]: with pd.ExcelWriter("../Data/MCF-7_random_state_42.xlsx") as writer:
    X_train.to_excel(writer, sheet_name="Train", index=True)
    X_test.to_excel(writer, sheet_name="Test", index=True)

```

```
#####  
#Molecular docking config  
#####  
receptor = 1SA0_AB_chains_prot_polar_H.pdbqt  
ligand = 1SA0_AB_chains_colchicine_only.pdbqt  
  
center_x = 119.743  
center_y = 92.779  
center_z = 10.765  
  
size_x = 44  
size_y = 44  
size_z = 60  
  
out = blind_try_lig_1_pub_1.pdbqt  
  
exhaustiveness = 32
```

# Notebook

January 18, 2024

```
[ ]: #####

# THE SOURCE CODE FOR MACHINE LEARNING AND FINAL MODELS CREATION

#####

## Load libraries
#Libraries import
import pandas as pd
from mordred import Calculator, descriptors
import mordred
import numpy as np
from rdkit import Chem

from sklearn.ensemble import RandomForestRegressor
from sklearn.tree import DecisionTreeRegressor
from sklearn.neighbors import KNeighborsRegressor
from sklearn.svm import SVR
from sklearn import linear_model

from sklearn.model_selection import train_test_split
from sklearn.metrics import r2_score, mean_squared_error
import math

def prepare_data(file):

    df = pd.read_excel(file)
    targets = list(df.columns)[10:]

    try:
        mol_objs = [Chem.MolFromSmiles(smi) for smi in df['SMILES']]
    except:
```

```

        mol_objs = [Chem.MolFromSmiles(smi) for smi in
↳df['AI_generated_SMILES']]

    calculate_descriptors = True

    if calculate_descriptors:
        calc = Calculator(descriptors, ignore_3D=True)
        molecular_descriptors = calc.pandas(mol_objs)
        molecular_descriptors = molecular_descriptors.
↳applymap(is_morder_missing)
        molecular_descriptors =
↳molecular_descriptors[sorted(molecular_descriptors.columns)]
    else:
        pass
    print("Data size (rows, columns): " + str(molecular_descriptors.shape))

    simple_preprocessing = True
    if simple_preprocessing:
        molecular_descriptors_cleaned = molecular_descriptors.dropna(axis=1,
↳how='any')
        molecular_descriptors_cleaned
        print("Data size after first reduction (rows, columns): " +
↳str(molecular_descriptors_cleaned.shape))
        molecular_descriptors_cleaned = molecular_descriptors_cleaned.loc[:,
↳(molecular_descriptors_cleaned != 0).any(axis=0)]
        print("Data size after second reduction (rows, columns): " +
↳str(molecular_descriptors_cleaned.shape))

    try:
        molecular_descriptors_cleaned[targets] = df[targets]
    except:
        print('There is an issue with the target values...')

    return molecular_descriptors_cleaned

def is_morder_missing(x):
    return np.nan if type(x) == mordred.error.Missing or type(x) == mordred.
↳error.Error else x

def correlation_dataframe(molecular_descriptors_cleaned, correlation_threshold,
↳target_column_name, verbose = False):

    if verbose:

```

```

correlation_table = pd.DataFrame(data=molecular_descriptors_cleaned.
↪columns.to_list(),
                                columns=["molecular descriptor name"])

print(correlation_table.head())
correlation_to_target = []
for mol_desc in correlation_table['molecular descriptor name']:
    x = np.corrcoef(np.array(molecular_descriptors_cleaned[mol_desc]),
                    np.
↪array(molecular_descriptors_cleaned[target_column_name]))
    x = x.tolist()[0][1]
    correlation_to_target.append(x)
    correlation_table['corr_value'] = correlation_to_target
print(correlation_table.head())
correlation_table['absolute correlation value'] = [abs(x) for x in
↪correlation_table['corr_value']]
print(correlation_table[: -1].head())

mol_desc_best_corr = correlation_table[correlation_table['absolute_
↪correlation value'] > correlation_threshold]

print(mol_desc_best_corr.head())
table_with_descriptors_to_be_used = mol_desc_best_corr[: -1]
print(table_with_descriptors_to_be_used.head())
else:
    correlation_table = pd.DataFrame(data=molecular_descriptors_cleaned.
↪columns.to_list(),
                                    columns=["molecular descriptor name"])

    correlation_to_target = []
    for mol_desc in correlation_table['molecular descriptor name']:
        x = np.corrcoef(np.array(molecular_descriptors_cleaned[mol_desc]),
                        np.
↪array(molecular_descriptors_cleaned[target_column_name]))
        x = x.tolist()[0][1]
        correlation_to_target.append(x)
        correlation_table['corr_value'] = correlation_to_target

        correlation_table['absolute correlation value'] = [abs(x) for x in
↪correlation_table['corr_value']]

    mol_desc_best_corr = correlation_table[correlation_table['absolute_
↪correlation value'] > correlation_threshold]

    table_with_descriptors_to_be_used = mol_desc_best_corr[: -1]

```

```

    return table_with_descriptors_to_be_used

def transform(target_val):
    transformed = []
    for element in target_val:
        transformed.append(-1.0 * np.log10(element/1000000000))
    return transformed

def inverse_transform(transformed_values):
    inversed = []
    for element in transformed_values:
        inversed.append(np.power(10,-element)*1000000000)
    return inversed

def prepare_model(data, features, model_type, test_data, target_column_name,
    ↪random_state = 15, n_estimators_ = 2, max_depth = 2, kernel_ = 'linear',
    ↪gamma_ = 'auto', train_test_split_ = False, verbose = False):

    if verbose:
        if model_type == 'RandomForestRegressor':
            model = RandomForestRegressor(random_state=15,
            ↪n_estimators=n_estimators_)
            print("The model used is: RandomForest...")
        elif model_type == 'DecisionTreeRegressor':
            model = DecisionTreeRegressor(random_state=15, max_depth=max_depth)
            print("The model used is: DecisionTree...")
        elif model_type == 'KNeighborsRegressor':
            model = KNeighborsRegressor()
            print("The model used is: KNeighbors...")
        elif model_type == 'SVR':
            model = SVR(gamma = gamma_, kernel=kernel_)
            print("The model used is: SVR...")
        elif model_type == 'linear_model':
            model = linear_model.LinearRegression()
            print("The model used is: LinearReg...")
        else:
            model = linear_model.LinearRegression()
            print("The model used is: Linear...")
    else:
        if model_type == 'RandomForestRegressor':

```

```

        model = RandomForestRegressor(random_state=15,
↪n_estimators=n_estimators_)

    elif model_type == 'DecisionTreeRegressor':
        model = DecisionTreeRegressor(random_state=15, max_depth=max_depth)

    elif model_type == 'KNeighborsRegressor':
        model = KNeighborsRegressor()

    elif model_type == 'SVR':
        model = SVR(gamma=gamma_, kernel=kernel_)

    elif model_type == 'linear_model':
        model = linear_model.LinearRegression()

    else:
        model = linear_model.LinearRegression()

    if verbose:
        if train_test_split_:
            X_train, X_test, y_train, y_test =
↪train_test_split(data[features['molecular descriptor name']],
                                                           
↪data[target_column_name],
                                                            test_size=0.15,
↪random_state=random_state)

        model.fit(X_train, y_train)
        try:
            print("Return the coefficient of determination of the
↪prediction: ")
            print(model.score(X_test, y_test))
        except:
            pass

    pred = model.predict(X_train)
    print("R^2 score: " + str(r2_score(y_train, pred)))
    sqrt_r2 = np.sqrt(r2_score(y_train, pred))
    training_data_r2 = r2_score(y_train, pred)
    print('Correlation coefficient: ' + str(sqrt_r2))
    print("Test data - unseen during training:")
    pred = model.predict(X_test)
    print("R^2 score: " + str(r2_score(y_test, pred)))
    sqrt_r2 = np.sqrt(r2_score(y_test, pred))
    print('Correlation coefficient: ' + str(sqrt_r2))

```

```

print(pred)
print(y_test)
test_data_r2 = r2_score(y_test, pred)
pred = model.predict(X_train)
training_data_RMSE = math.sqrt(mean_squared_error(y_train, pred))
print('Training Root Mean Square Error: '+str(training_data_RMSE))
pred = model.predict(X_test)
test_data_RMSE = math.sqrt(mean_squared_error(y_test, pred))
print('Testing Root Mean Square Error: '+str(test_data_RMSE))

else:
    X = data[features['molecular descriptor name']]

    y = data[target_column_name]

    model.fit(X, y)
    print("Return the coefficient of determination of the prediction: ")
    print(model.score(test_data[features['molecular descriptor name']],
↳test_data[target_column_name]))

    pred = model.predict(X)
    print("R^2 score: "+ str(r2_score(y, pred)))
    sqrt_r2 = np.sqrt(r2_score(y, pred))
    training_data_r2 = r2_score(y, pred)
    print('Correlation coefficient: '+ str(sqrt_r2))
    print("Test data - unseen during training:")
    pred = model.predict(test_data[features['molecular descriptor_
↳name']])
    print("R^2 score: "+ str(r2_score(test_data[target_column_name],
↳pred)))
    sqrt_r2 = np.sqrt(r2_score(test_data[target_column_name], pred))
    print('Correlation coefficient: '+ str(sqrt_r2))
    print(pred)
    print(test_data[target_column_name])
    test_data_r2 = r2_score(test_data[target_column_name], pred)
    pred = model.predict(X_train)
    training_data_RMSE = math.
↳sqrt(mean_squared_error(test_data[target_column_name], pred))
    print('Training Root Mean Square Error: '+str(training_data_RMSE))
    pred = model.predict(X_test)
    test_data_RMSE = math.
↳sqrt(mean_squared_error(test_data[target_column_name], pred))
    print('Testing Root Mean Square Error: '+str(test_data_RMSE))

else:
    if train_test_split_:
```



```

X_train, X_test, y_train, y_test =
↳train_test_split(data[features['molecular descriptor name']],
                                                          
↳data[target_column_name],
                                                           test_size=0.15,
↳random_state=random_state)

model.fit(X_train, y_train)

pred = model.predict(X_train)
sqrt_r2 = np.sqrt(r2_score(y_train, pred))
training_data_r2 = r2_score(y_train, pred)
pred = model.predict(X_test)
sqrt_r2 = np.sqrt(r2_score(y_test, pred))

test_data_r2 = r2_score(y_test, pred)

pred = model.predict(X_train)
training_data_RMSE = math.sqrt(mean_squared_error(y_train, pred))

pred = model.predict(X_test)
test_data_RMSE = math.sqrt(mean_squared_error(y_test, pred))

else:
    X = data[features['molecular descriptor name']]

    y = data[target_column_name]

    model.fit(X, y)

    pred = model.predict(X)

    sqrt_r2 = np.sqrt(r2_score(y, pred))
    training_data_r2 = r2_score(y, pred)
    pred = model.predict(test_data[features['molecular descriptor_
↳name']])
    sqrt_r2 = np.sqrt(r2_score(test_data[target_column_name], pred))
    test_data_r2 = r2_score(test_data[target_column_name], pred)
    pred = model.predict(X_train)
    training_data_RMSE = math.
↳sqrt(mean_squared_error(test_data[target_column_name], pred))

    pred = model.predict(X_test)
    test_data_RMSE = math.
↳sqrt(mean_squared_error(test_data[target_column_name], pred))

```

```

    return model, training_data_r2, test_data_r2, training_data_RMSE,
    test_data_RMSE

def data_standardization(dataframe, target_column_name):

    dataframe_ = dataframe.drop([target_column_name], axis=1)

    to_be_returned = (dataframe_ - dataframe_.mean()) / dataframe_.std()
    to_be_returned[target_column_name] = dataframe[target_column_name]

    return to_be_returned

def prepare_data_and_create_model(molecular_descriptors_df,
    correlation_threshold, standardization, model_type, target_column_name,
    random_state = 15, n_estimators_ = 12, max_depth = 2, kernel_ = 'linear',
    gamma_ = 'auto', train_test_split_ = True, verbose = False):

    if standardization == True:

        if verbose:
            print("I am doing standardization...")
        else:
            pass

        data_to_be_prepared = molecular_descriptors_df

        stand = data_standardization(data_to_be_prepared, target_column_name)

        corr = correlation_dataframe(stand, correlation_threshold,
    target_column_name, verbose)

        if train_test_split_:
            test_data_ = 'None'
            model, train_r2, test_r2, training_data_RMSE, test_data_RMSE =
    prepare_model(data_to_be_prepared, corr, model_type, test_data_,
    target_column_name, random_state, n_estimators_, max_depth, kernel_, gamma_,
    train_test_split_, verbose)
        else:
            print("There is no hardcoded validation data...")

    elif standardization == False:

```

```

    if verbose:
        print("I am not doing standardization...")
    else:
        pass

    data_to_be_prepared = molecular_descriptors_df

    corr = correlation_dataframe(data_to_be_prepared,
    ↪correlation_threshold, target_column_name, verbose)

    if train_test_split_:
        test_data_ = 'None'
        model, train_r2, test_r2, training_data_RMSE, test_data_RMSE =
    ↪prepare_model(data_to_be_prepared, corr, model_type, test_data_,
    ↪target_column_name, random_state, n_estimators_, max_depth, kernel_, gamma_,
    ↪train_test_split_, verbose)
    else:
        print("There is no hardcoded validation data...")
    else:
        print("Error...")

    return model, train_r2, test_r2, data_to_be_prepared, corr,
    ↪target_column_name, training_data_RMSE, test_data_RMSE

```
