# Supplementary material for: Machine Learning Application for Medicinal Chemistry: Colchicine Case, New Structures, and Anticancer Activity Prediction
Source: Pharmaceuticals (Basel). 2024 Jan 29;17(2):173. doi: 10.3390/ph17020173 (PMC10892630; doi:10.3390/ph17020173)
Supplement: Supplementary file 1 [file pharmaceuticals-17-00173-s001.zip]

Archive with 4 entries (4 files):
- Additional Supplementary Figures.pdf
- Files - colchicine AI.pdf
- Supplementary code.pdf
- Supplementary Data.xlsx
