# Supplementary material for: Machine Learning Application for Medicinal Chemistry: Colchicine Case, New Structures, and Anticancer Activity Prediction
Source: Pharmaceuticals (Basel). 2024 Jan 29;17(2):173. doi: 10.3390/ph17020173 (PMC10892630; doi:10.3390/ph17020173)
Supplement: Supplementary file 1 [file pharmaceuticals-17-00173-s001.zip › Supplementary Data.xlsx]

## Sheet: File 1
	Publication DOI	Number of compound in publication	SMILES	Activity [nM]	A549	MCF-7	LoVo	LoVo/DX	BALB/3T3	A549_float	MCF-7_float	LoVo_float	LoVo/DX_float	BALB/3T3_float
0	https://doi.org/10.1016/j.bmcl.2021.128382	1	COc2c3C1=CC=C(SC)C(=O)C=C1[C@H](CCc3cc(OC)c2OC)NCC	Activity [nM]	10,8	10,3	6,5	54,9	10,2	10.8	10.3	6.5	54.9	10.2
1	https://doi.org/10.1016/j.bmcl.2021.128382	2	COc2c3C1=CC=C(SC)C(=O)C=C1[C@H](CCc3cc(OC)c2OC)NCCC	Activity [nM]	11,6	12,0	8,5	31.1	14.3	11.6	12	8.5	31.1	14.3
2	https://doi.org/10.1016/j.bmcl.2021.128382	3	COc2c3C1=CC=C(SC)C(=O)C=C1[C@H](CCc3cc(OC)c2OC)NCCCC	Activity [nM]	10,9	12,2	8,8	17,9	11,7	10.9	12.2	8.8	17.9	11.7
3	https://doi.org/10.1016/j.bmcl.2021.128382	4	CC(C)CN[C@H]2CCc3cc(OC)c(OC)c(OC)c3C1=CC=C(SC)C(=O)C=C12	Activity [nM]	10,5	11,3	8,5	10,2	11,0	10.5	11.3	8.5	10.2	11
4	https://doi.org/10.1016/j.bmcl.2021.128382	5	COc2c3C1=CC=C(SC)C(=O)C=C1[C@H](CCc3cc(OC)c2OC)NCCCCC	Activity [nM]	89,5	92,7	52,8	77,8	99,4	89.5	92.7	52.8	77.8	99.4
5	https://doi.org/10.1016/j.bmcl.2021.128382	6	CC(C)CCN[C@H]2CCc3cc(OC)c(OC)c(OC)c3C1=CC=C(SC)C(=O)C=C12	Activity [nM]	13,1	12,0	8,4	9,4	13,3	13.1	12	8.4	9.4	13.3
6	https://doi.org/10.1016/j.bmcl.2021.128382	7	COc2c3C1=CC=C(SC)C(=O)C=C1[C@H](CCc3cc(OC)c2OC)NCCCCCC	Activity [nM]	104,0	109,3	83,0	72,7	106.7	104	109.3	83	72.7	106.7
7	https://doi.org/10.1016/j.bmcl.2021.128382	8	CC(CCC)CN[C@H]2CCc3cc(OC)c(OC)c(OC)c3C1=CC=C(SC)C(=O)C=C12	Activity [nM]	11,0	17,8	12,0	70,2	78.5	11	17.8	12	70.2	78.5
8	https://doi.org/10.1016/j.bmcl.2021.128382	9	COc2c3C1=CC=C(SC)C(=O)C=C1[C@H](CCc3cc(OC)c2OC)NCCCCCCCC	Activity [nM]	1007,3	1124.4	902,9	692,7	1036.3	1007.3	1124.4	902.9	692.7	1036.3
9	https://doi.org/10.1016/j.bmcl.2021.128382	10	COc2c3C1=CC=C(SC)C(=O)C=C1[C@H](CCc3cc(OC)c2OC)NCCCCCCCCCCCC	Activity [nM]	151,8	719,2	453,0	1984.1	1068,4	151.8	719.2	453	1984.1	1068.4
10	https://doi.org/10.1016/j.bmcl.2021.128382	11	COc2c3C1=CC=C(SC)C(=O)C=C1[C@H](CCc3cc(OC)c2OC)NCc4ccccc4	Activity [nM]	9,6	10,3	7,9	13,9	9,8	9.6	10.3	7.9	13.9	9.8
11	https://doi.org/10.1016/j.bmcl.2021.128382	12	COc3c(OC)c(OC)cc4CC[C@H](NCc1ccncc1)C2=CC(=O)C(SC)=CC=C2c34	Activity [nM]	10,9	9.7	7,8	56,2	10,9	10.9	9.7	7.8	56.2	10.9
12	https://doi.org/10.1016/j.bmcl.2021.128382	13	Oc4ccccc4CN[C@H]2CCc3cc(OC)c(OC)c(OC)c3C1=CC=C(SC)C(=O)C=C12	Activity [nM]	9,3	10,3	9,4	41,7	8,8	9.3	10.3	9.4	41.7	8.8
13	https://doi.org/10.1016/j.bmcl.2021.128382	14	Oc1ccc(cc1OC)CN[C@H]3CCc4cc(OC)c(OC)c(OC)c4C2=CC=C(SC)C(=O)C=C23	Activity [nM]	10,8	10,3	8,8	69,4	10,8	10.8	10.3	8.8	69.4	10.8
14	https://doi.org/10.1016/j.bmcl.2021.128382	15	COc1ccc(cc1O)CN[C@H]3CCc4cc(OC)c(OC)c(OC)c4C2=CC=C(SC)C(=O)C=C23	Activity [nM]	7,1	8,2	53,3	85.6	385.2	7.1	8.2	53.3	85.6	385.2
15	https://doi.org/10.1016/j.bmcl.2021.128382	16	Cc1ccc(cc1)CN[C@H]3CCc4cc(OC)c(OC)c(OC)c4C2=CC=C(SC)C(=O)C=C23	Activity [nM]	83,4	100,1	47,6	52,3	85,4	83.4	100.1	47.6	52.3	85.4
16	https://doi.org/10.1016/j.bmcl.2021.128382	17	Fc1ccc(cc1)CN[C@H]3CCc4cc(OC)c(OC)c(OC)c4C2=CC=C(SC)C(=O)C=C23	Activity [nM]	9.6	11,2	7,6	33,2	11,7	9.6	11.2	7.6	33.2	11.7
17	https://doi.org/10.1016/j.bmcl.2021.128382	18	Clc1ccc(cc1)CN[C@H]3CCc4cc(OC)c(OC)c(OC)c4C2=CC=C(SC)C(=O)C=C23	Activity [nM]	70,5	73,4	37,0	64,9	88,2	70.5	73.4	37	64.9	88.2
18	https://doi.org/10.1016/j.bmcl.2021.128382	19	Ic1ccc(cc1)CN[C@H]3CCc4cc(OC)c(OC)c(OC)c4C2=CC=C(SC)C(=O)C=C23	Activity [nM]	101,2	84,2	72,4	233,9	118,9	101.2	84.2	72.4	233.9	118.9
19	https://doi.org/10.1016/j.bmcl.2021.128382	20	COc2c3C1=CC=C(SC)C(=O)C=C1[C@H](CCc3cc(OC)c2OC)NCCc4ccccc4	Activity [nM]	10,7	11,4	10,7	66,9	61,2	10.7	11.4	10.7	66.9	61.2
20	https://doi.org/10.1016/j.bmcl.2021.128382	21	COc2c3C1=CC=C(SC)C(=O)C=C1[C@H](CCc3cc(OC)c2OC)NC/C=C/c4ccccc4	Activity [nM]	95,0	102,3	79,2	210.5	98,6	95	102.3	79.2	210.5	98.6
21	https://doi.org/10.1016/j.bmcl.2021.128382	22	COc2c3C1=CC=C(SC)C(=O)C=C1[C@H](CCc3cc(OC)c2OC)NC/C=C/c4ccccc4	Activity [nM]	47,3	7,7	27,9	399,6	50,3	47.3	7.7	27.9	399.6	50.3
22	https://doi.org/10.1016/j.bmcl.2021.128382	COLCH	COc3cc2CC[C@@H](NC(C)=O)c1cc(=O)c(OC)ccc1c2c(OC)c3OC	Activity [nM]	19,3	10,1	12,7	966,8	82,3	19.3	10.1	12.7	966.8	82.3
23	https://doi.org/10.1016/j.bmcl.2021.128382	TCOLCH	COc3cc2CC[C@H](NC(C)=O)c1cc(=O)c(SC)ccc1c2c(OC)c3OC	Activity [nM]	0,9	1,1	1,0	157,8	9,6	0.9	1.1	1	157.8	9.6
24	https://doi.org/10.1016/j.bmcl.2021.128382	DTCOLCH	COc3cc2CC[C@H](N)c1cc(=O)c(SC)ccc1c2c(OC)c3OC	Activity [nM]	11,0	9,5	10,3	77,8	15,4	11	9.5	10.3	77.8	15.4
25	https://doi,org/10,3390/molecules25051180	1	CC(=O)N[C@H]2CCc3cc(OC)c(OC)c(OC)c3C1=CC=C(O)C(=O)C=C12	Activity [nM]	12986	11229	6002		10250	12986	11229	6002		10250
26	ttps://doi,org/10,3390/molecules25051180	2a	CC(=O)OC1=CC=C2C(=CC1=O)[C@H](CCc3cc(OC)c(OC)c(OC)c23)NC(C)=O	Activity [nM]	12469	10033	6183		8497	12469	10033	6183		8497
27	ttps://doi,org/10,3390/molecules25051180	2b	CCC(=O)OC1=CC=C2C(=CC1=O)[C@H](CCc3cc(OC)c(OC)c(OC)c23)NC(C)=O	Activity [nM]	9970	7564	2385		7471	9970	7564	2385		7471
28	ttps://doi,org/10,3390/molecules25051180	2c	CC(C)C(=O)OC1=CC=C2C(=CC1=O)[C@H](CCc3cc(OC)c(OC)c(OC)c23)NC(C)=O	Activity [nM]	20387	11948	6469		8418	20387	11948	6469		8418
29	ttps://doi,org/10,3390/molecules25051180	2d	CC(=O)N[C@H]3CCc4cc(OC)c(OC)c(OC)c4C2=CC=C(OC(=O)c1ccccc1)C(=O)C=C23	Activity [nM]	8750	8209	4869		8924	8750	8209	4869		8924
30	ttps://doi,org/10,3390/molecules25051180	2e	O=C(OC)OC1=CC=C2C(=CC1=O)[C@H](CCc3cc(OC)c(OC)c(OC)c23)NC(C)=O	Activity [nM]	978	976	484		821	978	976	484		821
31	ttps://doi,org/10,3390/molecules25051180	2f	O=C(OCC)OC1=CC=C2C(=CC1=O)[C@H](CCc3cc(OC)c(OC)c(OC)c23)NC(C)=O	Activity [nM]	9671	9069	6406		8358	9671	9069	6406		8358
32	ttps://doi,org/10,3390/molecules25051180	3	CC(=O)N[C@H]2CCc3cc(OC)c(OC)c(O)c3C1=CC=C(SC)C(=O)C=C12	Activity [nM]	823	123	113		606	823	123	113		606
33	ttps://doi,org/10,3390/molecules25051180	4a	CC(=O)Oc2c3C1=CC=C(SC)C(=O)C=C1[C@H](CCc3cc(OC)c2OC)NC(C)=O	Activity [nM]	482	95	110		654	482	95	110		654
34	ttps://doi,org/10,3390/molecules25051180	4b	CCC(=O)Oc2c3C1=CC=C(SC)C(=O)C=C1[C@H](CCc3cc(OC)c2OC)NC(C)=O	Activity [nM]	971	959	489		748	971	959	489		748
35	ttps://doi,org/10,3390/molecules25051180	4c	CC(C)C(=O)Oc2c3C1=CC=C(SC)C(=O)C=C1[C@H](CCc3cc(OC)c2OC)NC(C)=O	Activity [nM]	885	858	556		708	885	858	556		708
36	ttps://doi,org/10,3390/molecules25051180	4d	CC(=O)N[C@H]3CCc4cc(OC)c(OC)c(OC(=O)c1ccccc1)c4C2=CC=C(SC)C(=O)C=C23	Activity [nM]	601	779	96		450	601	779	96		450
37	ttps://doi,org/10,3390/molecules25051180	4e	O=C(OC)Oc2c3C1=CC=C(SC)C(=O)C=C1[C@H](CCc3cc(OC)c2OC)NC(C)=O	Activity [nM]	900	1018	425		783	900	1018	425		783
38	ttps://doi,org/10,3390/molecules25051180	4f	O=C(OCC)Oc2c3C1=CC=C(SC)C(=O)C=C1[C@H](CCc3cc(OC)c2OC)NC(C)=O	Activity [nM]	955	950	787		1031	955	950	787		1031
39	https://doi.org/10.1021/acsomega.1c03948	2	CC(=O)N[C@H]2CCc3cc(OC)c(OC)c(OC)c3C1=CC=C(NC)C(=O)C=C12	Activity [nM]	4.4	3.5	5.4	230	6	4.4	3.5	5.4	230	6
40	https://doi.org/10.1021/acsomega.1c03948	3	COc2c3C1=CC=C(NC)C(=O)C=C1[C@@H](N)CCc3cc(OC)c2OC	Activity [nM]	12	8.1	8.9	55	16	12	8.1	8.9	55	16
41	https://doi.org/10.1021/acsomega.1c03948	4	COc2c3C1=CC=C(NC)C(=O)C=C1[C@H](CCc3cc(OC)c2OC)/N=[N+]=[N-]	Activity [nM]	1.4	1.5	1.1	1.7	2.1	1.4	1.5	1.1	1.7	2.1
42	https://doi.org/10.1021/acsomega.1c03948	5	COc3c(OC)c(OC)cc2CC[C@@H](C1=CC(=O)C(NC)=CC=C1c23)n4ccnn4	Activity [nM]	6.1	5.6	5.6	55	11	6.1	5.6	5.6	55	11
43	https://doi.org/10.1021/acsomega.1c03948	6	COc3c(OC)c(OC)cc2CC[C@@H](C1=CC(=O)C(NC)=CC=C1c23)n4cc(nn4)CCC	Activity [nM]	15	11	13	85	24	15	11	13	85	24
44	https://doi.org/10.1021/acsomega.1c03948	7	COc3c(OC)c(OC)cc2CC[C@@H](C1=CC(=O)C(NC)=CC=C1c23)n4cc(nn4)CCCC	Activity [nM]	6.4	5.4	3.1	23	9.9	6.4	5.4	3.1	23	9.9
45	https://doi.org/10.1021/acsomega.1c03948	8	COc3c(OC)c(OC)cc2CC[C@@H](C1=CC(=O)C(NC)=CC=C1c23)n4cc(nn4)CN	Activity [nM]	70	34	140	12000	400	70	34	140	12000	400
46	https://doi.org/10.1021/acsomega.1c03948	9	COc3c(OC)c(OC)cc2CC[C@@H](C1=CC(=O)C(NC)=CC=C1c23)n4cc(nn4)CO	Activity [nM]	12	6.8	11	1500	14	12	6.8	11	1500	14
47	https://doi.org/10.1021/acsomega.1c03948	10	COc3c(OC)c(OC)cc2CC[C@@H](C1=CC(=O)C(NC)=CC=C1c23)n4cc(nn4)CCl	Activity [nM]	13	8.6	12	95	13	13	8.6	12	95	13
48	https://doi.org/10.1021/acsomega.1c03948	11	COc3c(OC)c(OC)cc2CC[C@@H](C1=CC(=O)C(NC)=CC=C1c23)n4cc(nn4)CCO	Activity [nM]	14	13	14	1700	18	14	13	14	1700	18
49	https://doi.org/10.1021/acsomega.1c03948	12	CC(C)(O)c1cn(nn1)[C@H]3CCc2cc(OC)c(OC)c(OC)c2C4=CC=C(NC)C(=O)C=C34	Activity [nM]	37	13	19	2400	50	37	13	19	2400	50
50	https://doi.org/10.1021/acsomega.1c03948	13	OC1(CCCCC1)c2cn(nn2)[C@H]4CCc3cc(OC)c(OC)c(OC)c3C5=CC=C(NC)C(=O)C=C45	Activity [nM]	94	88	65	1700	100	94	88	65	1700	100
51	https://doi.org/10.1021/acsomega.1c03948	14	COc3c(OC)c(OC)cc2CC[C@@H](C1=CC(=O)C(NC)=CC=C1c23)n4cc(nn4)c5ccccc5	Activity [nM]	13	10	10	27	20	13	10	10	27	20
52	https://doi.org/10.1021/acsomega.1c03948	15	Clc1ccc(cc1)c2cn(nn2)[C@H]4CCc3cc(OC)c(OC)c(OC)c3C5=CC=C(NC)C(=O)C=C45	Activity [nM]	39	35	47	150	92	39	35	47	150	92
53	https://doi.org/10.1021/acsomega.1c03948	16	COc3c(OC)c(OC)cc2CC[C@@H](C1=CC(=O)C(NC)=CC=C1c23)n4cc(nn4)c5ccccn5	Activity [nM]	35	28	27	210	41	35	28	27	210	41
54	https://doi.org/10.1021/acsomega.1c03948	17	COc3c(OC)c(OC)cc2CC[C@@H](C1=CC(=O)C(NC)=CC=C1c23)n4cc(nn4)COCc5ccccc5	Activity [nM]	6.9	6.1	5.7	84	11	6.9	6.1	5.7	84	11
55	https://doi.org/10.1021/acsomega.1c03948	18	O=C(OC)c1cn(nn1)[C@H]3CCc2cc(OC)c(OC)c(OC)c2C4=CC=C(NC)C(=O)C=C34	Activity [nM]	13	12	12	280	20	13	12	12	280	20
56	https://doi.org/10.1021/acsomega.1c03948	19	O=C(OCC)c1cn(nn1)[C@H]3CCc2cc(OC)c(OC)c(OC)c2C4=CC=C(NC)C(=O)C=C34	Activity [nM]	17	11	13	220	24	17	11	13	220	24
57	https://doi.org/10.1021/acsomega.1c03948	20	O=C(O)c1cn(nn1)[C@H]3CCc2cc(OC)c(OC)c(OC)c2C4=CC=C(NC)C(=O)C=C34	Activity [nM]	1300	1200	1200	3400	2100	1300	1200	1200	3400	2100
58	https://doi.org/10.1021/acsomega.1c03948	21	Fc1ccc(cc1)COC(=O)c2cn(nn2)[C@H]4CCc3cc(OC)c(OC)c(OC)c3C5=CC=C(NC)C(=O)C=C45	Activity [nM]	21	21	21	530	25	21	21	21	530	25
59	https://doi.org/10.1021/acsomega.1c03948	22	O=C(OCC)c4c(nnn4[C@H]2CCc1cc(OC)c(OC)c(OC)c1C3=CC=C(NC)C(=O)C=C23)C(=O)OCC	Activity [nM]	72	93	97	580	110	72	93	97	580	110
60	https://doi.org/10.1021/acsomega.1c03948	23	O=C(O)c4c(nnn4[C@H]2CCc1cc(OC)c(OC)c(OC)c1C3=CC=C(NC)C(=O)C=C23)C(=O)O	Activity [nM]	1000	990	860	2900	1200	1000	990	860	2900	1200
61	https://doi.org/10.1021/acsomega.1c03948	24	CCCCCCCCCCCCCCCC(=O)OCc1cn(nn1)[C@H]3CCc2cc(OC)c(OC)c(OC)c2C4=CC=C(NC)C(=O)C=C34	Activity [nM]	16	11	19	3300	54	16	11	19	3300	54
62	https://doi.org/10.1021/acsomega.1c03948	25	FC(F)(F)CCC(=O)OCc1cn(nn1)[C@H]3CCc2cc(OC)c(OC)c(OC)c2C4=CC=C(NC)C(=O)C=C34	Activity [nM]	1.3	1.1	2.2	350	6.7	1.3	1.1	2.2	350	6.7
63	https://doi.org/10.1021/acsomega.1c03948	26	CC(C)(C)OC(=O)NCCC(=O)OCc1cn(nn1)[C@H]3CCc2cc(OC)c(OC)c(OC)c2C4=CC=C(NC)C(=O)C=C34	Activity [nM]	2.4	1.1	2.9	700	6.4	2.4	1.1	2.9	700	6.4
64	https://doi.org/10.1021/acsomega.1c03948	27	Clc1ccccc1C(=O)OCc2cn(nn2)[C@H]4CCc3cc(OC)c(OC)c(OC)c3C5=CC=C(NC)C(=O)C=C45	Activity [nM]	2.9	2.4	4.7	89	8.7	2.9	2.4	4.7	89	8.7
65	https://doi.org/10.1021/acsomega.1c03948	28	COc3c(OC)c(OC)cc2CC[C@@H](C1=CC(=O)C(NC)=CC=C1c23)n4cc(nn4)COC(=O)c5ccncc5	Activity [nM]	9.5	3.9	7.9	1000	12	9.5	3.9	7.9	1000	12
66	https://doi.org/10.1021/acsomega.1c03948	29	CC(C)C(=O)NCc1cn(nn1)[C@H]3CCc2cc(OC)c(OC)c(OC)c2C4=CC=C(NC)C(=O)C=C34	Activity [nM]	12	12	14	2700	48	12	12	14	2700	48
67	https://doi.org/10.1021/acsomega.1c03948	30	CCCCCCCCCCCCCCCC(=O)NCc1cn(nn1)[C@H]3CCc2cc(OC)c(OC)c(OC)c2C4=CC=C(NC)C(=O)C=C34	Activity [nM]	16	9.3	300	7300	290	16	9.3	300	7300	290
68	https://doi.org/10.1021/acsomega.1c03948	31	ClC(Cl)C(=O)NCc1cn(nn1)[C@H]3CCc2cc(OC)c(OC)c(OC)c2C4=CC=C(NC)C(=O)C=C34	Activity [nM]	3.3	3	3.1	830	9.9	3.3	3	3.1	830	9.9
69	https://doi.org/10.1021/acsomega.1c03948	32	ClCCCCC(=O)NCc1cn(nn1)[C@H]3CCc2cc(OC)c(OC)c(OC)c2C4=CC=C(NC)C(=O)C=C34	Activity [nM]	4.4	2.7	5	2800	22	4.4	2.7	5	2800	22
70	https://doi.org/10.1021/acsomega.1c03948	33	ClCCCCC(=O)NCc1cn(nn1)[C@H]3CCc2cc(OC)c(OC)c(OC)c2C4=CC=C(NC)C(=O)C=C34	Activity [nM]	11	9.7	11	3000	27	11	9.7	11	3000	27
71	https://doi.org/10.1021/acsomega.1c03948	34	CC(C)(C)OC(=O)NCCC(=O)NCc1cn(nn1)[C@H]3CCc2cc(OC)c(OC)c(OC)c2C4=CC=C(NC)C(=O)C=C34	Activity [nM]	26	10	33	17000	270	26	10	33	17000	270
72	https://doi.org/10.1021/acsomega.1c03948	35	Clc1ccccc1C(=O)NCc2cn(nn2)[C@H]4CCc3cc(OC)c(OC)c(OC)c3C5=CC=C(NC)C(=O)C=C45	Activity [nM]	5.7	3.8	6.3	1000	12	5.7	3.8	6.3	1000	12
73	https://doi.org/10.1021/acsomega.1c03948	36	COc3c(OC)c(OC)cc2CC[C@@H](C1=CC(=O)C(NC)=CC=C1c23)n4cc(nn4)CNC(=O)c5ccncc5	Activity [nM]	22	12	13	9100	74	22	12	13	9100	74
74	https://doi.org/10.1021/acsomega.1c03948	37	O=C(OC)NCc1cn(nn1)[C@H]3CCc2cc(OC)c(OC)c(OC)c2C4=CC=C(NC)C(=O)C=C34	Activity [nM]	7.2	4.7	8.5	1500	14	7.2	4.7	8.5	1500	14
75	https://doi.org/10.1021/acsomega.1c03948	38	O=C(OCC)NCc1cn(nn1)[C@H]3CCc2cc(OC)c(OC)c(OC)c2C4=CC=C(NC)C(=O)C=C34	Activity [nM]	4.8	4.2	7.7	840	12	4.8	4.2	7.7	840	12
76	https://doi.org/10.1021/acsomega.1c03948	39	O=C(OCC=C)NCc1cn(nn1)[C@H]3CCc2cc(OC)c(OC)c(OC)c2C4=CC=C(NC)C(=O)C=C34	Activity [nM]	3.3	2.6	4.3	440	9.1	3.3	2.6	4.3	440	9.1
77	https://doi.org/10.1021/acsomega.1c03948	40	CC(C)COC(=O)NCc1cn(nn1)[C@H]3CCc2cc(OC)c(OC)c(OC)c2C4=CC=C(NC)C(=O)C=C34	Activity [nM]	1.2	1.2	1.7	310	3.9	1.2	1.2	1.7	310	3.9
78	https://doi.org/10.1021/acsomega.1c03948	41	CC(C)(C)OC(=O)NCc1cn(nn1)[C@H]3CCc2cc(OC)c(OC)c(OC)c2C4=CC=C(NC)C(=O)C=C34	Activity [nM]	5.4	3.2	5.1	570	11	5.4	3.2	5.1	570	11
79	https://doi.org/10.1021/acsomega.1c03948	42	ClC(Cl)(Cl)COC(=O)NCc1cn(nn1)[C@H]3CCc2cc(OC)c(OC)c(OC)c2C4=CC=C(NC)C(=O)C=C34	Activity [nM]	1.9	2.5	3.8	470	2.7	1.9	2.5	3.8	470	2.7
80	https://doi.org/10.1021/acsomega.1c03948	43	O=C(Oc1ccccc1)NCc2cn(nn2)[C@H]4CCc3cc(OC)c(OC)c(OC)c3C5=CC=C(NC)C(=O)C=C45	Activity [nM]	4.1	2.8	4.7	920	11	4.1	2.8	4.7	920	11
81	https://doi.org/10.3390/molecules25153540	4	COc2c3C1=CC=C(NC)C(=O)C=C1[C@H](CCc3cc(OC)c2OC)NCC	Activity [nM]	9.4	8.7	7.3	62	8	9.4	8.7	7.3	62	8
82	https://doi.org/10.3390/molecules25153540	5	COc2c3C1=CC=C(NC)C(=O)C=C1[C@H](CCc3cc(OC)c2OC)NCCC	Activity [nM]	10.5	10.4	5	17.2	8.6	10.5	10.4	5	17.2	8.6
83	https://doi.org/10.3390/molecules25153540	6	COc2c3C1=CC=C(NC)C(=O)C=C1[C@H](CCc3cc(OC)c2OC)NCCCC	Activity [nM]	8.1	8.7	7.8	13.3	7.5	8.1	8.7	7.8	13.3	7.5
84	https://doi.org/10.3390/molecules25153540	7	COc2c3C1=CC=C(NC)C(=O)C=C1[C@H](CCc3cc(OC)c2OC)NCCCCCCCCCC	Activity [nM]	88.4	75.2	46.6	99.5	70.4	88.4	75.2	46.6	99.5	70.4
85	https://doi.org/10.3390/molecules25153540	8	CC(CC)N[C@H]2CCc3cc(OC)c(OC)c(OC)c3C1=CC=C(NC)C(=O)C=C12	Activity [nM]	9.6	9.7	7.8	8.5	7.5	9.6	9.7	7.8	8.5	7.5
86	https://doi.org/10.3390/molecules25153540	9	COc2c3C1=CC=C(NC)C(=O)C=C1[C@H](CCc3cc(OC)c2OC)NCCO	Activity [nM]	9.2	10.1	5.6	132	8.2	9.2	10.1	5.6	132	8.2
87	https://doi.org/10.3390/molecules25153540	10	COc2c3C1=CC=C(NC)C(=O)C=C1[C@H](CCc3cc(OC)c2OC)NCCC#N	Activity [nM]	9	7.5	2	51.5	6.7	9	7.5	2	51.5	6.7
88	https://doi.org/10.3390/molecules25153540	11	COc2c3C1=CC=C(NC)C(=O)C=C1[C@H](CCc3cc(OC)c2OC)NCCCCl	Activity [nM]	8.4	7.6	1.3	12.8	5.9	8.4	7.6	1.3	12.8	5.9
89	https://doi.org/10.3390/molecules25153540	12	FC(F)(F)CCN[C@H]2CCc3cc(OC)c(OC)c(OC)c3C1=CC=C(NC)C(=O)C=C12	Activity [nM]	9.5	9	2.3	8.2	7.9	9.5	9	2.3	8.2	7.9
90	https://doi.org/10.3390/molecules25153540	13	COc2c3C1=CC=C(NC)C(=O)C=C1[C@H](CCc3cc(OC)c2OC)NCc4ccccc4	Activity [nM]	4.6	7.3	0.9	6	6.2	4.6	7.3	0.9	6	6.2
91	https://doi.org/10.3390/molecules25153540	14	Clc4ccccc4CN[C@H]2CCc3cc(OC)c(OC)c(OC)c3C1=CC=C(NC)C(=O)C=C12	Activity [nM]	1.1	0.7	0.1	1.6	4.5	1.1	0.7	0.1	1.6	4.5
92	https://doi.org/10.3390/molecules25153540	15	Oc1ccc(cc1)CN[C@H]3CCc4cc(OC)c(OC)c(OC)c4C2=CC=C(NC)C(=O)C=C23	Activity [nM]	8.9	8.5	5.2	72.2	7.3	8.9	8.5	5.2	72.2	7.3
93	https://doi.org/10.3390/molecules25153540	16	COc3c(OC)c(OC)cc4CC[C@H](NCc1ccncc1)C2=CC(=O)C(NC)=CC=C2c34	Activity [nM]	8.9	9.6	5.2	48.1	6.9	8.9	9.6	5.2	48.1	6.9
94	https://doi.org/10.3390/molecules25153540	17	COc3c(OC)c(OC)cc4CC[C@H](NCc1cccs1)C2=CC(=O)C(NC)=CC=C2c34	Activity [nM]	9.4	9.3	0.9	7.9	4.9	9.4	9.3	0.9	7.9	4.9
95	https://doi.org/10.1016/j.bmcl.2021.128197	4	NC(=O)N[C@H]2CCc3cc(OC)c(OC)c(OC)c3C1=CC=C(NC)C(=O)C=C12	Activity [nM]	38,0	16,0	10,0	6300	150	38	16	10	6300	150
96	https://doi.org/10.1016/j.bmcl.2021.128197	5	CNC(=O)N[C@H]2CCc3cc(OC)c(OC)c(OC)c3C1=CC=C(NC)C(=O)C=C12	Activity [nM]	79,0	12,0	17,0	7300	21,0	79	12	17	7300	21
97	https://doi.org/10.1016/j.bmcl.2021.128197	6	CC(C)NC(=O)N[C@H]2CCc3cc(OC)c(OC)c(OC)c3C1=CC=C(NC)C(=O)C=C12	Activity [nM]	34,0	16,0	24	2400	34,0	34	16	24	2400	34
98	https://doi.org/10.1016/j.bmcl.2021.128197	7	CN(C)C(=O)N[C@H]2CCc3cc(OC)c(OC)c(OC)c3C1=CC=C(NC)C(=O)C=C12	Activity [nM]	33,0	16,0	27,0	1600	42,0	33	16	27	1600	42
99	https://doi.org/10.1016/j.bmcl.2021.128197	8	CCN(CC)C(=O)N[C@H]2CCc3cc(OC)c(OC)c(OC)c3C1=CC=C(NC)C(=O)C=C12	Activity [nM]	110	23,0	12,0	1200	89,0	110	23	12	1200	89
100	https://doi.org/10.1016/j.bmcl.2021.128197	9	CC(C)N(C(C)C)C(=O)N[C@H]2CCc3cc(OC)c(OC)c(OC)c3C1=CC=C(NC)C(=O)C=C12	Activity [nM]	74,0	42,0	46,0	730	100	74	42	46	730	100
101	https://doi.org/10.1016/j.bmcl.2021.128197	10	O=C(N[C@H]2CCc3cc(OC)c(OC)c(OC)c3C1=CC=C(NC)C(=O)C=C12)N4CCOCC4	Activity [nM]	190	120	53,0	10000	110	190	120	53	10000	110
102	https://doi.org/10.1016/j.bmcl.2021.128197	11	COc2c3C1=CC=C(NC)C(=O)C=C1[C@H](CCc3cc(OC)c2OC)NC(=O)Nc4ccccc4	Activity [nM]	12,0	11,0	10,0	1100	20,0	12	11	10	1100	20
103	https://doi.org/10.1016/j.bmcl.2021.128197	12	Clc1ccc(cc1)NC(=O)N[C@H]3CCc4cc(OC)c(OC)c(OC)c4C2=CC=C(NC)C(=O)C=C23	Activity [nM]	4,0	4,2	7,3	1000	14	4	4.2	7.3	1000	14
104	https://doi.org/10.1016/j.bmcl.2021.128197	13	Fc1ccc(cc1)NC(=O)N[C@H]3CCc4cc(OC)c(OC)c(OC)c4C2=CC=C(NC)C(=O)C=C23	Activity [nM]	4,9	4,0	4,8	1000	15	4.9	4	4.8	1000	15
105	https://doi.org/10.1016/j.bmcl.2021.128197	14	FC(F)(F)c1ccc(cc1)NC(=O)N[C@H]3CCc4cc(OC)c(OC)c(OC)c4C2=CC=C(NC)C(=O)C=C23	Activity [nM]	82,0	130	19,0	1000	73,0	82	130	19	1000	73
106	https://doi.org/10.1016/j.bmcl.2021.128197	15	NC(=S)N[C@H]2CCc3cc(OC)c(OC)c(OC)c3C1=CC=C(NC)C(=O)C=C12	Activity [nM]	12,0	16,0	11,0	1400	15	12	16	11	1400	15
107	https://doi.org/10.1016/j.bmcl.2021.128197	16	CNC(=S)N[C@H]2CCc3cc(OC)c(OC)c(OC)c3C1=CC=C(NC)C(=O)C=C12	Activity [nM]	2,0	16,0	9,6	1000	8,2	2	16	9.6	1000	8.2
108	https://doi.org/10.1016/j.bmcl.2021.128197	17	CCCCNC(=S)N[C@H]2CCc3cc(OC)c(OC)c(OC)c3C1=CC=C(NC)C(=O)C=C12	Activity [nM]	13	17,0	9.4	700	6,3	13	17	9.4	700	6.3
109	https://doi.org/10.1016/j.bmcl.2021.128197	18	CN(C)C(=S)N[C@H]2CCc3cc(OC)c(OC)c(OC)c3C1=CC=C(NC)C(=O)C=C12	Activity [nM]	13	8,2	13	200	13,0	13	8.2	13	200	13
110	https://doi.org/10.1016/j.bmcl.2021.128197	19	CCN(CC)C(=S)N[C@H]2CCc3cc(OC)c(OC)c(OC)c3C1=CC=C(NC)C(=O)C=C12	Activity [nM]	78,0	10,0	16	860	91,0	78	10	16	860	91
111	https://doi.org/10.1016/j.bmcl.2021.128197	20	C=CCN(CC=C)C(=S)N[C@H]2CCc3cc(OC)c(OC)c(OC)c3C1=CC=C(NC)C(=O)C=C12	Activity [nM]	23,0	17,0	36,0	140	32,0	23	17	36	140	32
112	https://doi.org/10.1016/j.bmcl.2021.128197	21	OCCN(CCO)C(=S)N[C@H]2CCc3cc(OC)c(OC)c(OC)c3C1=CC=C(NC)C(=O)C=C12	Activity [nM]	27,0	14,0	27,0	140	31,0	27	14	27	140	31
113	https://doi.org/10.1016/j.bmcl.2021.128197	22	S=C(N[C@H]1CCc3cc(OC)c(OC)c(OC)c3C2=CC=C(NC)C(=O)C=C12)N4CCCC4	Activity [nM]	15,0	9,5	16,0	160	18,0	15	9.5	16	160	18
114	https://doi.org/10.1016/j.bmcl.2021.128197	23	Clc1ccc(cc1)NC(=S)N[C@H]3CCc4cc(OC)c(OC)c(OC)c4C2=CC=C(NC)C(=O)C=C23	Activity [nM]	12,0	15,0	23,0	940	36	12	15	23	940	36
115	https://doi.org/10.1016/j.bmcl.2021.128197	24	FC(F)(F)c1ccc(cc1)NC(=S)N[C@H]3CCc4cc(OC)c(OC)c(OC)c4C2=CC=C(NC)C(=O)C=C23	Activity [nM]	86,0	120	54,0	2700	67,0	86	120	54	2700	67
116	https://doi.org/10.1016/j.bmcl.2021.128197	25	O[C@@H](CNC(=S)N[C@H]2CCc3cc(OC)c(OC)c(OC)c3C1=CC=C(NC)C(=O)C=C12)[C@H]4OC(C)(C)O[C@@H]4[C@H]5COC(C)(C)O5	Activity [nM]	70,0	15,0	32,0	5300	440	70	15	32	5300	440
117	https://doi.org/10.1016/j.bmcl.2021.128197	26	OC[C@@H](O)[C@@H](O)[C@H](O)[C@@H](O)CNC(=S)N[C@H]2CCc3cc(OC)c(OC)c(OC)c3C1=CC=C(NC)C(=O)C=C12	Activity [nM]	930	1200	680	6600	1300	930	1200	680	6600	1300
118	https://doi.org/10.1016/j.bmcl.2021.128197	27	CC(C)(C)OC(=O)\N=C(/NC(=O)OC(C)(C)C)N[C@H]2CCc3cc(OC)c(OC)c(OC)c3C1=CC=C(NC)C(=O)C=C12	Activity [nM]	850	940	500	5900	690	850	940	500	5900	690
119	https://doi.org/10.1016/j.bmcl.2021.128197	28	N=C(N)N[C@H]2CCc3cc(OC)c(OC)c(OC)c3C1=CC=C(NC)C(=O)C=C12	Activity [nM]	740	760	920	86000	1800	740	760	920	86000	1800

## Sheet: File 10
	AI_generated_SMILES
0	COC1=C2C3=CC=C(NC)C(=O)C=C3[C@H1](CCC2=CC(OC)=C1OC)NCC
1	COC1=C2C3=CC=C(NC)C(=O)C=C3[C@H1](CCC2=CC(OC)=C1OC)NC(=O)N
2	COC1=C2C3=CC=C(NC)C(=O)C=C3[C@H1](CCC2=CC(OC)=C1OC)NCCC
3	COC1=C2C3=CC=C(NC)C(=O)C=C3[C@H1](CCC2=CC(OC)=C1OC)NCCONC
4	COC1=C2C3=CC=C(NC)C(=O)C=C3[C@H1](CCC2=CC(OC)=C1OC)NCCCC
5	CC(C)CN[C@H1]1CCC2=CC(OC)=C(OC)C(OC)=C2C3=CC=C(SC)C(=O)C=C31
6	CC(C)CN[C@H1]1CCC2=CC(OC)=C(OC)C(OC)=C2C3=CC=C(SC)C(=O)C=C13
7	CC(C)CN[C@H1]1CCC2=CC(OC)=C(OC)C(OC)=C2C3=CC=C(C(C=C31)=O)SC
8	COC1=C2C3=CC=C(NC)C(=O)C=C3[C@H1](CCC2=CC(OC)=C1OC)NCCCCC
9	C1=C2CC[C@H1](C=CC(C(OC)=CC=CC2=C)(OC)C(=C1OC)O)C=O
10	COC1=C2C3=CC=C(NC)C(=O)C=C3[C@H1](CCC2=CC(OC)=C1OC)NCCCCCC
11	CC(C)CCN[C@H1]1CCC2=CC(OC)=C(OC)C(OC)=C2C3=CC=C(SC)C(=O)C=C31
12	CC(C)CCN[C@@H1]1C2=CC(C(SC)=CC=C2C3=C(OC)C(OC)=C(OC)C=C3CC1)=O
13	CC(C)CCN[C@@H1]1C2=CC(C(SC)=CC=C2C3=C(CC1)C=C(OC)C(OC)=C3OC)=O
14	CC(C)CCN[C@H1]1CCC2=CC(OC)=C(OC)C(OC)=C2C3=CC=C(SC)C(=O)C=C13
15	CC(C)CCN[C@H1]1CCC2=CC(OC)=C(OC)C(OC)=C2C3=CC=C(SC)C(C=C13)=O
16	CC(C)CCN[C@H1]1CCC2=CC(OC)=C(OC)C(OC)=C2C3=CC=C(SC)C(C=C31)=O
17	COC1=C2C3=CC=C(NC)C(=O)C=C3[C@H1](CCC2=CC(OC)=C1OC)NCCC#N
18	COC1=C2C3=CC=C(NC)C(=O)C=C3[C@H1](CCC2=CC(OC)=C1OC)NCCCCCCCC
19	COC1=C2C3=CC=C(SC)C(=O)C=C3[C@H1](CCC2=CC(OC)=C1OC)NCCCCCCCC
20	COC1=C2C3=CC=C(NC)C(=O)C=C3[C@H1](CCC2=CC(OC)=C1OC)N4C=C(N=N4)CNCC
21	COC1=C2C3=CC=C(NC)C(=O)C=C3[C@H1](CCC2=CC(OC)=C1OC)NCCCCCCCCCCCC
22	COC1=CC2=CC=C(NC)C(C=C2[C@@H1](N3C=C(N=N3)CN)CCC1=CC(=COC)OC)=O
23	COC1=C2C3=CC=C(SC)C(=O)C=C3[C@H1](CCC2=CC(OC)=C1OC)NCC4=CC=CC=C4
24	COC1=C2C3=CC=C(NC)C(=O)C=C3[C@H1](CCC2=CC(OC)=C1OC)NCC4=CC=CC=C4
25	C1=C2C(C3=C(OC)C(=C(C=C3CC4[C@@H1]2NCC4CCC)OC)OC)=CC=C(NC)C1=O
26	COC1=C(OC)C(OC)=CC=2CC[C@@H1](C3=CC(C(=CC=C3C1=2)NC)=O)NCC=4SC=CC=4
27	C12=CC(C(NC)=CC=C1C=C(CC[C@@H1]2NCCC(F)(F)F)C=C(OC)C(OC)=COC)=O
28	C12=CC(C(NC)=CC=C1C3=C(C=C(OC)C(OC)=C3OC)CC[C@@H1]2NCCC(F)(F)F)=O
29	C1=C2C([C@H1](CCC3=CC(OC)=C(C(=C32)OC)OC)NCCCCl)(C(NC)=C1)O
30	C=1=C2C([C@H1](CCC3=CC(OC)=C(C(=C32)OC)OC)NCCCCl)(C(NC)=CC=1)O
31	COC1=C(OC)C(OC)=CC=2CC[C@@H1](C3=CC(C(=CC=C3C1=2)NC)=O)N4C=C(CO)N=N4
32	C1=C2C([C@H1](CCC3=CC(OC)=C(C(=C32)OC)OC)NCCCCl)(C(=C1)NC)O
33	C12=CC(C(NC)=CC=C1C=C(CC[C@H1]2NCCC(F)F)F)OC=O
34	OC1=CC=CC=C1CN[C@H1]2CCC3=CC(OC)=C(OC)C(OC)=C3C4=CC=C(SC)C(=O)C=C42
35	OC1=CC=CC=C1CN[C@H1]2CCC3=CC(OC)=C(OC)C(OC)=C3C4=CC=C(SC)C(=O)C=C24
36	C1=NCCC1=O
37	C12=NCCC1[C@H1]CNC32C4CC=CC=C3C4=CC
38	OC1=CC=CC=C1CN[C@H1]2CCC3=CC(OC)=C(OC)C(OC)=C3C4=CC=C(C(C=C42)=O)SC
39	O=CC1=CN=NN1[C@H1]2CCC3=CC(OC)=C(OC)C(OC)=C3C4=CC=C(C(=O)C=C42)NCC
40	C1=NCCC1NC[C@@H1]2C3=CC(C(SC)=CC=C3C4=C(OC)C(OC)=C(C=C4CC2)OC=O)NC(=O)C
41	C1=NCC(F)=CC=C1CN[C@H1]2CCC3=CC(OC)=C(OC)C(OC)=C3C4=CC=C(C(=O)C=C24)SCC
42	OC1=CC=C(C=C1)CN[C@H1]2CCC3=C(C(OC)=C(OC)C(OC)=C3)C4=CC=C(SC)C(=O)C=C24
43	OC1=CC=C(C=C1)CN[C@H1]2CCC3=CC(OC)=C(OC)C(OC)=C3C4=CC=C(C(C=C42)=O)SCC
44	O=CC1=C[C@H1](CCC=C2C(OC)=C(OC)C(OC(C)=O)=C2C1=CC=C(SC)C=O)CC=O
45	OC1=CC=C(C=C1)CN[C@H1]2CCC3=CC(OC)=C(OC)C(OC)=C3C4=CC=C(SC)C(=O)C=C42
46	OC1=CC=C(C=C1)CN[C@H1]2CCC3=C(C(OC)=C(OC)C(OC)=C3)C4=CC=C(SC)C(C=C24)=O
47	OC1=CC=C(C=C1)CN[C@H1]2CCC3=C(C(OC)=C(OC)C(OC)=C3)C4=CC=C(SC)C(=O)C=C42
48	OC1=CC=C(C=C1)CN[C@H1]2CCC3=CC(OC)=C(OC)C(OC)=C3C4=CC=C(SC)C(=O)C=C24
49	O=CC1=C2[C@H1](CCC3=CC(OC)=C(OC)C(OC(=O)C)=C3C1=CC=C(SC)C2=O)CC=O
50	O=CC1=C2[C@H1](CCC3=CC(OC)=C(OC)C(=C3C2=CC=C(SC)C1=O)OCC4=CC=CC=C4)ONC
51	COC1=CC=C(C(OC)=C1OC)C2=CC=C(SC)C(C=C2[C@@H1](NCNCCCC=O)SCC)=O
52	COC1=CC=C(C(OC)=C1OC)C2=CC=C(SC)C(C=C2[C@@H1]NC(N(COC)C)=C)=CNC=O
53	C1=CCC2[C@H1](N3C(C(OCC)=O)=C(N=N3)C=CC(=O)C4NC)CC=CC=C4C2=C(OC)C(OC)=C1OCNC=O
54	C1OC2=CC=C(C(OC)=C2OC)C3=CC=C(SC)C1(C=C3[C@@H1](NC(N(CC)CC)=O)CC=C)NC=O
55	C1OC2=CC=C(C(OC)=C2OC)C3=CC=C(NC)C(C=C3[C@@H1](NC(N(COC)C)O)C=C1)=O
56	CC1=CC=C(SC)C(C=C1[C@@H1](NC(=O)C)CCC=CC(OC)=C(OC)C(OC=CCOC)=C)=O
57	C1C2=CC=C(SC)C(C=C2[C@@H1](NC(C)=O)CCC=CC(OC)=C(OC)C(OC(=O)C=C)C1)SC=O
58	CC1=CC=C(C=C1)CN[C@H1]2CCC3=CC(OC)=C(OC)C(OC)=C3C4=CC=C(SC)C(=O)C=C42
59	CC1=C2C=C(SC)C(C=C1[C@@H1](NC(=O)C)CCC=CC(OC)=C(OC)C(OC=CCOC)=C2)=O
60	CC1=CC=C(C=C1)CN[C@H1]2CCC3=CC(OC)=C(OC)C(OC)=C3C4=CC=C(SC)C(C=C24)=O
61	CCOC(OC1=C2CC([C@H1](CCC2=CC(OC)=C1OC)NC(C)=O)=CC(C(SC)=CC)=O)SC
62	CCOC(OC1=CC=CC2=C(OC)C(OC)=C(OC)C=C2CC[C@@H1](C=CC1=O)NC(C)=O)SSC=O
63	OC(NC(=O)OC)C=CC=C1C2=C(OC)C(OC)=C(OC)C=C2CC[C@@H1](C1=CC=O)NC(C)=O
64	O1C(OC(=O)OC)=CC=C2C([C@@H1](NC(C)=O)CCC3=CC(OC)=C(OC)C(OC)=C32)=CC1NC
65	OC(NCCOCOC1)[C@@H1]C2=CC(C(NC)=CC=C2C3=C(OC)C(OC)=C(OC)C=C3CC1)=O
66	C1[C@H1](CCC2=CC(OC)=C(OC)C(OC)=C2C1=CC=C(OC(OC)=O)C=O)CSCNC(=O)C
67	C=1=C2C(C3=C(OC)C(OC)=C(OC)C=C3CC[C@@H1]2NC(C)=O)C=C(OC(CC)=O)C(C=1)=O
68	N([C@H1]1CCC=C(C(OC)=C(OC)C(OC)=C1C2=CC=C(SC)CC=C2)OC3=CC)=NC=C3
69	OC(N1CCOC12)[C@@H1]C3=CC(C(NC)=CC=C3C4=C(OC)C(OC)=C(OC)C=C4CC2)=O
70	C1[C@H1](CCC2=CC(OC)=C(OC)C(OC)=C2C1=CC=C(SC)CC)ONC(C)=O
71	C1=2[C@H1](CCC3=CC(OC)=C(OC)C(OC)=C3C1=CC=C(SC)C(=O)C=2)NC(C)CC=CSC
72	C1[C@@H1](C2=CCC(SC)=CC=C2C3=C(OC)C(OC)=C(OC)C=C3C1)ONC(C)=O
73	N([C@H1]1CC2C=C(C(OC)=C(OC)C(OC)=C1C3=CC=C(SC)CC=C23)OC=CC)=NC=C
74	C1N(C(=S)N[C@@H1]2C3=CC(C(NC)=CC=C3C4=C(OC)C(OC)=C(OC)C=C4CC2)=O)C=C1
75	C=1=CC(C(C=C2[C@H1](CCC3=C(C(OC)=C(OC)C(OC)=C3)C2=1)SC(C)=O)C)=O
76	C1=2[C@H1](CCC3=CC(OC)=C(OC)C(OC)=C3C1=CC=C(SC)C(C=2)=O)NC(C)=O
77	OC1=C(C=CC=C1)CN[C@H1]2CCC3=CC(OC)=C(OC)C(OC)=C3C4=CC=C(SC)C(C=C24)=O
78	OC=C(OC)C=CC(CC([C@@H1](NC(=O)C)C=CCC(SC)=CC)=O)C
79	C1=CC=C(S1C)C2=CN(NC2)[C@H1]C3C4C5=CC(OC)=C(OC)C(OC)=C5C=CC=C(NC)C(=O)C=C34
80	OC=C(OC)C=C1C(C2=CC=C(SC)C(C=C2[C@H1](CC1)NC(C)=O)OCC(=O)OCS)C=O
81	C1=2[C@H1](CCC3=CC(OC)=C(OC)C(OC)=C3C1=CC=C(C(C=2)=O)SCNC(C)=O)C
82	C1[C@H1](C2=CCC(SC)=CC=C2C3=C(OC)C(OC)=C(OC)C=C3C1=O)C=O
83	C1=CC2=C(S1C)C(=O)C3=C[C@H1](CCC4=C(C(OC)=C(OC)C(OC)=C4)C23)NCSC
84	C1[C@H1](CCC2=CC(OC)=C(OC)C(OC(=O)CC)=C2C1=CC=C(SC)C(=O)CNC)SC
85	C1[C@@H1](C2=CC(C(SC)=CC=C2C3=C(OC)C(OC)=C(OC)C=C3CCNCC)=O)C1SC=O
86	C[C@H1](CCC1=CC(OC)=C(OC)C(OC(OCC)=O)=C1C2=CC=C(SC)C(=O)C=C2)NC
87	OC=C(OC)C=CC(CC([C@@H1](NC(=O)C)C=CCC(SC)=CC)=O)CSC
88	C1[C@H1](CCC2=CC(OC)=C(OC)C(OC)=C2C3=CC=C(C(C=C3)=O)SCNCC)OC1
89	C1=CC=C(C=C1)CN[C@H1]2CCC3=CC(OC)=C(OC)C(OC)=C3C4=CC=C(SC)C(=O)C=C42
90	C[C@H1]1CCC2=CC(OC)=C(OC)C(OC)=C2C3=CC=C(C(=O)C=C31)SCNC(C)=O
91	C[C@H1](CCC1=CC(OC)=C(OC)C(OC)=C1C2=CC=C(C(C=C2)=O)SCNCC)O
92	OC1=C(C=CC=C1)CN[C@@H1]2C3=CC(C(SC)=CC=C3C4=C(OC)C(OC)=C(OC)C=C4CC2)=O
93	C1=CC=2C1=CC(C(SC)=CC=2)=O
94	C=CC=1C(=CCC(OC(C(C)C=2)=O)=CC=1OC(NCC=2)C)CC=C(OC)C(OC)=CC(C)=CNCNCC
95	C=CC=1C(=CCC(OC(C(C)C=2)=O)=CC=1OC(NCC=2)C)CC=C(OC3)C(OC)=CC(C)=C3NCNC
96	C12=CC=3C(=CCC(OC(C(C)C)=O)=CC=3OC([C@@H1]N)C=C)C=CC=C1SC=CC(OC)=C2OC
97	C1[C@H1](CCC2=CC(OC)=C(OC)C(OC(CC)=O)=C2C1=CC=C(SC)C(=O)CNC)SC
98	C=CC1C2([C@@H1]CCC3=CC(OC)=C(OC)COC)C3C2=CC=C(SC)C1=O
99	C1=CC=2C(=CCC(OC(C3=CC=CC4=C3)=O)=CC=2O[C@H1]CCC1)NC=C(OC)C4OC
100	C=CCC(=CC=C(SC)CC=C[C@H1]CC)NC(C)=O
101	OC1=C(C=CC=C1)CN[C@H1]2CCC3=CC(OC)=C(OC)C(OC)=C3C4=CC=C(SC)C(C=C42)=O
102	COC1=C2C3=CC=C(SC)C(=O)C=C3[C@H1](CCC2=CC(OC)=C1OC)NCCC4=CC=CC=C4
103	COC1=C2C3=CC=C(NC)C(=O)C=C3[C@H1](CCC2=CC(OC)=C1OC)NCCCCCCC
104	COC1=C2C3=CC=C(NC)C(=O)C=C3[C@H1](CCC2=CC(OC)=C1OC)NCCC4=CC=CC=C4
105	C1=C2CC[C@H1](C3=CCC(NC)=CC=C3C2=C(OC)C(=C1OC)OC)ONCCCCCCC
106	COC1=C2C3=CC=C(NC)C(=O)C=C3[C@H1](CCC2=CC(OC)=C1OC)NC/C=C/C4=CC=CC=C4
107	COC1=C2C3=CC=C(SC)C(=O)C=C3[C@H1](CCC2=CC(OC)=C1OC)NC/C=C/C4=CC=CC=C4
108	COC1=C2C3=CC=C(NC)C(=O)C=C3[C@H1](CCC2=CC(OC)=C1OC)N4N=NC(=C4)CO
109	COC=CCC=1C[C@@H1](C=C2CC(OC(C(C)C)=O)=CC=C2C=1C=COC)OC=O
110	CSC=1C(C=C2C(=CC=1)C3=C(OC)C(=C(OC)C=C3CC[C@@H1]2NCC)OO)C=O
111	COC1=CC=2CC[C@H1](NC(C)=O)C3=CC(=O)C(SC)=CC=C3C=2C(=C1OC)OC
112	CSC=1C(C=C2C(=CC=1)C3=C(OC)C(=C(OC)C=C3CC[C@@H1]2NCC)O)OC=O
113	CSC=1C(C=C2C(=CC=1)C3=C(OC)C=CC=C3CC[C@@H1]2NCN)COCOC=O
114	CSCCC=C1C(C2=C(C=C(OC)C(OC)=C2OC)CC[C@@H1]1N=O)CC=O
115	CSC1=CC=C2C(=CC1=O)[C@H1](CCC3=CC(OC)=C(OC)C(=C32)OC)NC(=O)C
116	COC1=CC=2CC[C@H1](NC(C)=O)C3=CC(=O)C(SC)=CC=C3C=2C(OC)=C1OC
117	CSC=1C(C=C2C(=CC=1)C3=C(OC)C(OC)=CC=C3CC[C@@H1]2NCC)=O
118	CSC=1C(C=C2C(=CC=1)C3=C(OC)C(OC)=C(C=C3CC[C@@H1]2NCC)OO)C=O
119	COC=CC=1CC[C@H1](NC(C)=O)C2=CC(=O)C(SC)=CC=C2C=1C(O)=COC
120	COC=C1CCC[C@H1](N)C2CC=CC(=C(OC)C(O)=C2C1=CCN)C=O
121	C=1OC=CC2CC[C@H1](N)CCC3=CC(=C(OC)C=C3C2=CC=1OCS)C
122	C1OC2=CCCC[C@H1](N)C3=CC(=O)C(SC)=CC=C3C2C(OC)=C1OC
123	C1N2CC1(C=C3C(=O)C(NC)=CC=C3C=C(OC)C(OC)=C(OC)C=C)CC[C@@H1]2N=O
124	COC=C1CC=2C[C@H1](N)C3=CC(C(=CC=C3C=2C(OC)=C1O)CN)C=O
125	COC1=CC2CC[C@H1](N)C3=CC(=O)C(SC)=CC=C3C1C(OC)=C2OC
126	CSC1=CC=C2C3=C(C=C(OC)C(OC)=C3OC)CC[C@@H1](C2=CC1=O)N
127	C=1SCC(C=C2C=1C3=C(CC[C@@H1]2NC(N)=O)C=C(OC)C(=C3OC)OC)SC=O
128	CSC=1C2(C=CC(=CC=1)C3=C(OC)C(OC)=CC=C3CC[C@@H1]2NOC)NC=O
129	CSC=1C(C2=CC(=CC=1)C3=C(OC)C(OC)=CC=C3CC[C@@H1]2NOC)NC=O
130	CC(=O)N[C@H1]1CCC2=CC(OC)=C(OC)C(OC)=C2C=3C1=CC(=O)C(SC)=CC=3
131	CC(=O)C(S1C2)CC(OC)=C(OC)C(O)=C2C=3C1=CC(C(SC)=CC=3)=O
132	CC(=O)C=C1C(C2=C(OC)C(OC)=C(OC)C=C2CC[C@@H1]1NCC)=O
133	CC(=O)N[C@H1]1CCC2=CC(OC)=C(OC)C(OC)=C2C=3C1=CC(=O)C(SC)=CC=3N
134	C1=2C(=O)C(=C3C=C1C4=C(CC[C@@H1]3NC(C)=O)C=C(OC)C(OC)=C4OC(OC)=O)C=2
135	C1C(=O)C(=C2C=C1C3=C(CC[C@@H1]2NC(C)=O)C=C(OC)C(OC)=C3OC(OC)=O)C
136	CC(=O)OC1=CC=C2C3=C(C(OC)=C(C=C3CC[C@@H1](C2=CC1=O)OC(=O)CO)CO)C
137	CC(=O)OC1=CC=C2C3=C(C(OC)=C(C=C3CC[C@@H1](C2=CC1=O)OC(=O)CO)CN)C(=O)COC
138	CC(=O)OC1=CC=C2C3=C(C(OC)=C(C=C3CC[C@@H1](C2=CC1=O)OC(=O)C)OC)NC(=O)C
139	CC(=O)OC1=CC=C2C(=CC1=O)[C@H1](CCC3=CC(OC)=C(OC)C(OC)=C23)NC(C)=O
140	CC(=O)N[C@@H1]1C=2C(C3=C(C(=C(OC)C=C3CC1)OC)OC)=CC=C(SC)C(C=2)=O
141	CC(=O)N[C@@H1]1C2=CC(=O)C(SC)=CC=C2C3=C(CC1)C=C(OC)C(=C3OC(=O)OCC)OC
142	CC(=O)OC1=CC=C2C3=C(C(OC)=C(C=C3CC[C@@H1](C2=CC1=O)OC(=O)C)OC)NC(=O)COC
143	CC(=O)OC1=CC=C2C3=C(C(OC)=C(C=C3CC[C@@H1](C2=CC1=O)OCNCC)O)OC
144	CC(=O)OC1=CC=C2C3=C(C(OC)=C(C=C3CC[C@@H1](C2=CC1=O)OC(=O)C)OC)OC
145	CCC(=O)OC1=CC=C2C(=CC1=O)[C@H1](CCC3=CC(OC)=C(OC)C(OC)=C23)NC(C)=O
146	CCC(=O)OC1=CC=C2C=C(C3C[C@H1](NC(=O)C)C2=CC1=O)C=C(OC)C(=C3OC)OC(=O)OC
147	CCC(=O)OC1=C2C(=CC(OC)=C1OC)CC[C@H1](NC(=O)C)C3=CC(=O)C(SC)=CC=C23
148	CCC(=O)OC1=CC=C2C3=C(C(OC)=C(C=C3CC[C@@H1](C2=CC1=O)OC(=O)C)NC)C=O
149	CCC(=O)OC1=CC=C2C3=C(C=C(OC)C(OC)=C3OC)CC[C@@H1](C2=CC1=O)NC(C)=O
150	CCC(=O)OC1=C2C(=CC(OC)=C1OC)CC[C@H1](NC(=O)C)C3=CC(=O)C(SC)=CC=C32
151	CC(C)C(=O)OC1=C2C(=CC(OC)=C1OC)CC[C@H1](NC(=O)C)C3=CC(=O)C(SC)=CC=C23
152	CC(C)C(=O)OC1=CC=C2C3=C(C=C(OC)C(OC)=C3OC)CC[C@@H1](C2=CC1=O)NC(C)=O
153	CC(C)C(=O)OC1=C2CC([C@@H1](NC(=O)C)CCC2=CC(=C1OC)OC)=CC(C(SC)=CC)=O
154	CC(C)C(=O)OC1=CC=C2C3=C(C(OC)=C(C=C3CC[C@@H1](C2=CC1=O)NC(=O)C)OC)OC
155	CC(C)C(=O)OC1=C2C3=CC=C(C(C=C3[C@H1](CCC2=CC(OC)=C1OC)NC=O)C)OOC
156	CC(C)C(OC1=CC=C2C3=C(CC[C@@H1](C2=CC1=O)NC(C)=O)C=C(OC)C(OC)=C3OC)(O)C
157	CC(C)C(=O)OC1=C2C(=CC(OC)=C1OC)CC[C@H1](NC(=O)C)C3=CC(=O)C(SC)=CC=C32
158	CC(C1)C(=O)OC=CC2=CC([C@@H1](NC(C)=O)CCC3=CC(=C(OC)C(O)=C3C2)O)OC=CC1=O
159	CC(=O)N[C@@H1]1C2=CC(C(SC)=CC=C2C3=C(C(OC)=C(OC)C=C3CC1)OC(=O)C4=CC=CC=C4)=O
160	CC(=O)N[C@@H1]1C2=CC(C(SC)=CC=C2C3=C(OC)C(=C(OC)C=C3CC1)OC(=O)C4=CC=CC=C4)=O
161	CC(=O)N[C@@H1]1C2=CC(C(SC)=CC=C2C3=C(C(OC)=C(OC)C=C3CC1)OC(=O)C(C)C)=O
162	CC(=O)N[C@@H1]1C2=CC(C(SC)=CC=C2C3=C(C(OC)=C(OC)C=C3CC1)OC(=O)C4=CC=CC)=C4O
163	O=C(OC)OC1=CC=C2C3=C(C(OC)=C(C=C3CC[C@@H1](C2=CC1=O)NC(=O)C)OC)OC(=O)C
164	O=C(OC1)OC=C2C3=CC=C(C(C=C3[C@H1](CCC2=CC(=C1OC)OC)NCC)=O)OOC(=O)C
165	O=C(OC)OC1=CC=C2C3=C(C(OC)=C(C=C3CC[C@@H1](C2=CC1=O)OC(=O)C)NC)C=O
166	O=C(OC1)OC=C2C3=CC=C(C(C=C3[C@H1](CCC2=CC(=C1OC)OC)NCC)=O)OOCO
167	O=C(OC)OC1=CC=C2C(=CC1=O)[C@H1](CCC3=CC(OC)=C(OC)C(OC)=C23)NC(C)=O
168	O=C(OC)OC=1C(C=C2C(=CC=1)C3=C(OC)C(=C(OC)C=C3CC[C@@H1]2NC(=O)C)OC)=O
169	O=C(OC)OCC(C=C1C(C2=C(C=C(OC)C(OC)=C2OC)CC[C@@H1]1NC(=O)C)=C)=O
170	O=C(OC)OC1=C2C3=CC=C(C(C=C3[C@H1](CCC2=CC(OC)=C1OC)NC=O)C)OOC
171	O=C(OC)OC1=CC=C2C3=C(C(OC)=C(C=C3CC[C@@H1](C2=CC1=O)NC(=O)C)OC)OC
172	O=C(C)N[C@@H1]1C=2C(C3=C(C(=C(OC)C=C3CC1)OC)OC)C=C(OC)C(C=2)=O
173	O=C(O1)C=C(C(OC)=CC=2CC[C@@H1](C3=CC(=O)C(SC)=CC=C3C1=2)NC(C)=O)COC
174	O=C(C)N[C@@H1]1CC(C2=C(C(=C(OC)C=C2CC1)OC)OC)C=C(OC)C(OCC=C)O
175	O=C(C)N[C@H1]1CCC2=CC(=C(OC)C(=C2C=3C1=CC(C(SC)=CC=3)=O)OC(=O)CC)COC
176	O=C(C)N[C@H1]1CCC2=CC(=C(OC)C(=C2C=3C1=CC(C(SC)=CC=3)=O)OC(=O)OCC)OC
177	O=C(C)N[C@H1]1CCC2=CC(=C(OC)C(=C2C=3C1=CC(C(=CC=3)OC)CC)OOCOC)C=O
178	CC(=O)N[C@H1]1CCC2=CC(OC)=C(OC)C(OC)=C2C3=CC=C(C(C=C31)=O)O
179	C1C(=O)C=C(C2=CC=C(SC)C(C=C2[C@H1](NC(C)=O)C)C)OC(OC)=C1O
180	CC(=O)N[C@H1]1CCC2=CC(OC)=C(OC)C(OC)=C2C3=CC=C(SC)C(=O)C=C13
181	CC(=O)OC1=C2C3=CC=C(SC)C(=O)C=C3[C@H1](CCC2=CC(OC)=C1OC)NC(C)=O
182	CC(=O)OC=C1C2=CC=C(SC)C(=O)C=C2[C@H1](CCC1=C(OC)C(OC)=C)OC(=O)OC
183	CC(=O)OC=C1C2=CC=C(SC)C(=O)C=C2[C@H1](CCC1=C(OC)C(OC)=C)OCNC(=O)C
184	CCC(=O)OC1=C2C3=CC=C(SC)C(=O)C=C3[C@H1](CCC2=CC(OC)=C1OC)NC(C)=O
185	C1=2C=CCC[C@H1](NC(=O)C)C1=CC(C(=CC=2)SC)=O
186	C1=2C=C(CC[C@H1](NC(=O)C)C1=CC(C(=CC=2)SC)=O)C(OC)C(=COC)OC
187	C12C=C(CC[C@H1](NC(=O)C)C1=CC(C(=CC)SC)=O)C(OC)C(OC)=C2OC
188	C123C=C(CC[C@H1](NC(=O)C)C1=CC(C(SC)=C2)=O)C(C(=C3OC)OC)OC
189	C12C=C(CC[C@H1](NC(=O)C)C1=CC(C(=CC)SC)=O)C(OC)C(=C2OC)OC(=O)C
190	C1=2C=C(CC[C@H1](NC(=O)C)C1=CC(C(=CC=2)SC)=O)C(OC)C(OC)=COC(=O)C
191	CC(C)C(=O)OC1=C2C3=CC=C(SC)C(=O)C=C3[C@H1](CCC2=CC(OC)=C1OC)NC(C)=O
192	CC(=O)OCC1=CN(N=N1)[C@H1]2CCC3=CC(OC)=C(OC)C(OC)=C3C=4C2=CC(=O)C(NC)=CC=4C
193	CC(=O)OCC1=CN(N=N1)[C@H1]2CCC3=CC(OC)=C(OC)C(=C3C=4C2=CC(C(NC)=CC=4)=O)OC
194	O=C(OC1)OC=CC=C2C3=C(OC)C(=C(OC)C=C3CC[C@H1](NC(=O)C)C2=CC1)OOC
195	O=C(OC1)OC=CC=C2C3=C(OC)C(=C(OC)C=C3CC[C@@H1](NC(C)=O)C2=CC1)OOC
196	O=C(OC)OC1=C2C3=CC=C(SC)C(C=C3[C@@H1](NC(=O)C)CCC2=CC(=C1OC)OC)=O
197	O=C(C)N[C@H1]1CCC2=CC(OC)=C(C(OC)=C2C=3C1=CC(C(=CC=3)OC(CC)=O)=O)OC
198	O=C(C)N[C@H1]1CCC2=CC(OC)=C(C(OC)=C2C=3C1=CC(C(=CC=3)OC(=O)OC)=O)OC
199	O=C(C)N[C@H1]1CCC2=CC(OC)=C(C(OC)=C2C=3C1=CC(=O)C(OC(CC)=O)=CC=3)OC
200	O=C(NC)NCC=CN(COCC)C1C(C2=C(OC)C=C(OC)C=C2CC[C@@H1]1NC=O)C=O
201	O=C(C)N[C@H1]CC1C2=CC(OC)=C(C(OC)=C2C3=CC=C(SC)C(=O)C=C13)OOCC
202	O=C(NC)N1CC=CC=C2C([C@H1](CCC3=CC(OC)=C(C(OC)=C32)OC)NC=O)C=C1O
203	O=C(CC)OC1=C2CC([C@@H1](NC(C)=O)CCC2=CC(OC)=C1OC)=CC(C(=CC)SC)=O
204	O=C(NC)NCC=CC=CC=C(OC(C1=CC=CC=C1)=O)C(OC)=C(OC)C(OC2)=C(OC)C(OC)=CCCC[C@@H1]C2NC=O
205	O=C(C)N[C@H1]1CCC2=CC(OC)=C(C(OC)=C2CC1=CC(C(OC(CC)=O)=CC)=O)OCNC
206	O=C(NC)NCC=CN(COC1C)CC(C2=C(OC)C(=C(OC)C=C2CC[C@@H1]1)NC(=O)C)OC=O
207	O=C(C)N[C@H1]1CCC2=CC(OC)=C(C(OC)=C2CC1=CC(C(OC(CC)=O)=CC)=O)OC
208	O=C(C)N[C@H1]CC1C2=CC(OC)=C(C(OC)=C2C3=CC=C(SC)C(=O)C=C13)OCC
209	O=C(NC)NCC=CC1=CC=C(OC(C2=CC=CC=C2)=O)C(OC)=C(OC)C(OC)=C(OC)C(OC)=CCCC[C@@H1]C=CC1
210	O=C(C)N[C@H1]1CCC2=CC(OC)=C(C(OC)=C2C=CC=C(OC(C)=O)C(C=C1)=O)OC
211	CC(=O)N[C@@H1]C1=C2C(C(NC)=CC=C1C3=C(OC)C(OC)=C(OC)C=C3CC2)NC=O
212	CC(=O)N[C@@H1]1C2=CC(C(NC)=CC=C2C3=C(OC)C(OC)=C(OC)C=C3C1)=O
213	CC(=O)N1[C@@H1]C2=CC(C(NC)=CC=C2C3=C(OC)C(OC)=C(OC)C=C3C1)=O
214	CC(=O)N[C@@H1]C1=CC(C(NC)=CC=C1C2=C(OC)C(OC)=C(OC)C=C2CC)N=O
215	CC(=O)N1[C@@H1]C2=CC(C(NC)=CC=C2C3=C(OC)C(OC)=C(OC)C=C3CC1)=O
216	CC(=O)N[C@H1]1CCC2=CC(OC)=C(OC)C(OC)=C2C3=CC=C(NC)C(=O)C=C31
217	CC(=O)N[C@@H1]C1=C2C(C(NC)=CC=C1C3=C(OC)C(OC)=C(OC)C=C3CC2)N=O
218	CC(=O)N[C@@H1]1C2=CC(C(NC)=CC=C2C3=C(OC)C(OC)=C(OC)C=C3C1)NC=O
219	CC(=O)N[C@@H1]C1=C2C(C(NC)=CC=C1C3=C(OC)C(OC)=C(OC)C=C3CC2)=O
220	CC(=O)N1[C@@H1]C2=CC(C(NC)=CC=C2C3=C(OC)C(OC)=C(OC)C=C3CC1)N=O
221	C1OC=CC2=C(C=3C(O)CC1=CC=C(OC)C=CC=3C2)COCSCSCC
222	C1OC=CC2C([C@@H1](N)CCC1=CCOC(=O)OCC=C)(OC)C(=C2)OCSC
223	COC=C1C2=CC=C(NC)C(=O)C=C2[C@H1](CCC1C=COC)NC(=O)CNC
224	C1OC=C2CC([C@H1](CCC2=C1)NC=CCC(SC)=CC)=O
225	C1OC=C2C=3C([C@H1](CCC2=C1)N=CCC(=CC=3)SC)=O
226	COC=C1C2=CC=C(NC)C(=O)C=C2[C@H1](CCC1C=COC)NC(=O)NNC
227	COC=C1C2=CC=C(NC)C(=O)C=C2[C@H1](CCC1C=COC)NC(=O)NC
228	COC=C1C2=CC=C(NC)C(=O)C=C2[C@H1](CCC1C=COC)NC(=O)N
229	COC=CC=C(C1=C2C=C(NC)CC=C1[C@H1](C)N=[N+1])[N-1]CC(OC)=C2OC
230	COC1=C2C3=CC=C(NC)C(=O)C=C3[C@@H1](NCCC)CCC2=CC(=C1OC)NC
231	COC=CC1=C(C2=CC=C(NC)CC=C2[C@H1](CC1)N)[N+1]=[N-1]
232	COC1=C2C3=CC=C(NC)C(=O)C=C3[C@H1](CCC2=CC(OC)=C1OC)N=[N+1]=[N-1]
233	C=1OC=CC2=C(C3=C(OC)C(OC)=CC=C3CC[C@@H1]2N=[N+1]=[N-1])NC=CC=1
234	COC1=C2C3=CC=C(NC)C(=O)C=C3[C@H1](CCC2=CC(OC)=C1OC)NN=NC=C
235	COC=CC1=C(C2=CC=C(NC)CC=C2[C@H1](C)N=[N+1])[N-1]CC(OC)=C1OC
236	COC1=C2C3=CC=C(NC)C(=O)C=C3[C@@H1](NCCC)CCC2=CC(=C1OC)OSC
237	COC=C1C2=CC=C(NC)C(=O)C=C2[C@@H1](N3N=NC=C3)CCC1=CC(=COC)OC
238	COC1=C2C3=CC=C(NC)C(=O)C=C3[C@H1](CCC2=CC(=C1OC)OC)NCCCS
239	COC1=CC=C(C2=CC=C(NC)CC=C2[C@H1](C)N=[N+1])[N-1]CC(OC)=C1OC
240	COC1=C2C3=CC=C(NC)C(=O)C=C3[C@H1](CCC2=CC(OC)=C1OC)N4N=NC=C4
241	COC1=C(OC)C(OC)=CC=2CC[C@@H1](C3=CC(=O)C(NC)=CC=C3C=21)N4C=CN=N4
242	C=C1C([C@H1](CCC2=CC(=C(OC)C(=C21)OC)OC)NC=CNCOCC(C)C)=O
243	C12=CC(C(SC)=CC=C1C3=C(C=C(C(OC)=C3OC)OC)CC[C@@H1]2NCC(C)CN)C=O
244	COC=C(OC)C(OC)=C1CCC[C@H1](N2C=CN=N2)C3=CC(=O)C(=CC=C3C1)NC
245	COC=C(OC)C(OC)=CC=1CC[C@H1](NC(=N)N)C2=CC(=O)C(=CC=C2C=1)CNC
246	COC1=C(OC)C(OC)=CC=2CC[C@H1](NC(=N)N)C3=CC(=O)C(=CC=C3C1=2)CNC
247	C12=CC(C(NC)=CC=C1C3=C(C=C(C(OC)=C3OC)OC)CC[C@@H1]2N4C=CN=N4)=O
248	CNC(NCCCC)=S[C@@H1]C1=CC(=O)C(NC)=CC=C1C2=C(C=C(OC)C(=C2OC)OC)CCF
249	COC1=C(OC)C(OC)=CC=2CC[C@@H1](C3=CC(=O)C(NC)=CC=C3C=21)N4C=C(N=N4)CCC
250	COC1=C(OC)C(OC)=CC=2CC[C@@H1](C3=CC(=O)C(NC)=CC=C3C=21)NCCCCCCCCCC
251	C12=CC(C(NC)=CC=C1C3=C(C=C(C(OC)=C3OC)OC)CC[C@@H1]2N4C=C(N=N4)CCC)=O
252	C12=CC(C(NC)=CC=C1C3=C(C=C(C(OC)=C3OC)OC)CC[C@@H1]2NCCCCCCCCCCC)CSC=O
253	CN(C(=S)N[C@@H1]1C2=CC(=O)C(NC)=CC=C2C3=C(C=C(OC)C(OC)=C3OC)CC1C)C#N
254	C1=C2C(C3=C(C=C(OC)C(=C3OC)OC)CC[C@@H1]2NCCCCCCCCCCCC=C)C=C(SC)C1=O
255	C12=CC3(C(NC)=CC=C1C4=C(C=C(C(OC)=C4OC)OC)CC[C@@H1]2NCCCCCCCCCCC)C=C3
256	COC1=C(OC)C(OC)=CC=2CC[C@@H1](C3=CC(=O)C(NC)=CC=C3C=21)N4C=C(N=N4)CCCC
257	C12=CC(C(NC)=CC=C1C3=C(C=C(C(OC)=C3OC)OC)CC[C@@H1]2N4C=C(N=N4)CCC)C=CNC=O
258	C=C1C([C@H1](CCC2=CC(=C(OC)C(=C21)OC)OC)NCCCCCC)CC=CC(C(SC)=C)=O
259	C=C1C(C2=C(C=C(OC)C(=C2OC)OC)CC[C@@H1]1NC/C=C/C3=CC=CC=C3CC)=C(SC)C=O
260	COC1=C(OC)C(OC)=CC=2CC[C@@H1](C3=CC(=O)C(NC)=CC=C3C=21)N4C=C(N=N4)CN
261	C12=CCC(NC)=CC=C1C3=C(C=C(C(OC)=C3OC)OC)CC[C@@H1]2NCCCCCCCCCC=O
262	CNC(C(C)C)N[C@@H1]1C=2C(C3=C(C=C(OC)C(OC)=C3OC)CC1)=CC=C(C(=O)C=2)NC
263	COC1=C(OC)C(OC)=CC=2CC[C@@H1](C3=CC(=O)C(NC)=CC=C3C=21)NCCCCCCCC
264	C=C1C([C@H1](C2CC3=CC(=C(OC)C(=C31)OC)OC)NCCCCCC)CCC=CC(C(=C2)SC)=O
265	COC1=C(OC)C(OC)=CC=2CC[C@@H1](C3=CC(=O)C(NC)=CC=C3C=21)N4C=C(N=N4)CO
266	C1=C2C([C@H1](CCC3=CC(=C(OC)C(=C32)OC)OC)NCCCCCC)=CC(C(SC)=C1)=O
267	COC1=C(OC)C(OC)=CC=2CC[C@@H1](C3=CC(=O)C(NC)=CC=C3C=21)N4C=C(N=N4)CON
268	C12=CC(C(NC)=CC=C1C3=C(C=C(C(OC)=C3OC)OC)CC[C@@H1]2NCCCCCCCCCC=O)SC
269	C12=CCC(NC)=CC=C1C3=C(C=C(C(OC)=C3OC)OC)CC[C@@H1]2NCCC4CCCCC4=O
270	COC1=C(OC)C(OC)=C2C(=C1)CC[C@@H1](C3=CC(C(=CC=C32)SC)=O)NC/C=C/C4=CC=CC=C4
271	COC1=C(OC)C(OC)=CC=2CC[C@@H1](C3=CC(=O)C(NC)=CC=C3C=21)NCCC4CCCCC4
272	C12=CC(C(NC)=CC=C1C3=C(C=C(C(OC)=C3OC)OC)CC[C@@H1]2NCCC4=CC=CC=C4C)SC
273	COC1=C(OC)C(OC)=CC=2CC[C@@H1](C3=CC(=O)C(NC)=CC=C3C=21)NCCC4=CC=CC=C4
274	COC1=C(OC)C(OC)=CC=2CC[C@@H1](C3=CC(=O)C(NC)=CC=C3C=21)N4C=C(N=N4)CCl
275	CNC(C(C)O)N[C@@H1]1CC(C2=C(C=C(OC)C(OC)=C2OC)CC1)=CC=C(C(=O)C)NC
276	COC1=C(OC)C(OC)=CC=2CC[C@@H1](C3=CC(=O)C(NC)=CC=C3C=21)NCCC(F)(F)F
277	C12=CC(C(NC)=CC=C1C3=C(C=C(C(OC)=C3OC)OC)CC[C@@H1]2NCCC4=CC=CC=C4C)NC=O
278	C12=CCC(NC)=CC=C1C3=C(C=C(C(OC)=C3OC)OC)CC[C@@H1]2NCCC4=CC=CC=C4C
279	COC1=C(OC)C(OC)=CC=2CC[C@@H1](C3=CC(=O)C(NC)=CC=C3C=21)N4C=C(N=N4)CCO
280	C=C1C2([C@@H1](NCCCCCCCCCC)CCC3=CC=C(OC)C(=C31)OC)OC=CC(C(=C2)NC)=O
281	C=C1C([C@H1](CCC2=CC(=C(OC)C(=C21)OC)OC)NCCCCCC)=CC(C(SC)=C)=O
282	C1=C2C([C@H1](CCC3=CC(=C(OC)C(=C32)OC)OC)NCCCCCC)C=CC(C(=C1)SC)=O
283	CC(C)(O)C=1N=NN(C=1)[C@@H1]2C3=CC(C(NC)=CC=C3C4=C(OC)C(OC)=C(OC)C=C4CC2)=O
284	CC(C)(C)C(OC1=CC=CC2=C(OC)C(OC)=C(OC)C=C2CC[C@H1](NC(=O)C)C1=CC=O)=O
285	CC(C)C(=O)OCCC=C1[C@H1](CCC2=CC(OC)=C(OC)C(OC)=C2C1=CCN)SC=O
286	C=1C(C)(C)C(OC2=CC=CC3=C(OC)C(OC)=C(OC)C=C3CC[C@H1](NC(=O)C)C2=CC=1O)SC
287	CC(C)(C)COC1=CC=C2C3=C(OC)C(OC)=C(OC)C=C3CC[C@@H1](C2=CC1=O)SC=O
288	OC1(CCCCC1)C2=CN(N=N2)[C@H1]3CCC4=CC(OC)=C(OC)C(OC)=C4C5=CC=C(NC)C(=O)C=C35
289	O=C(C=CNCC(=O)OCCN[C@H1]1)CCC2=C(C(OC)=C(OC)C(OC)=C2)C3=CC=C(NC)C(=O)C=C13
290	C1=2[C@H1]CCC3=CC(OC)=C(OC)C(OC(CC)=O)=C3C1=CC=C(C(C=2)=O)SCNC(=O)CSC
291	O=C(CCCCCCC)C=O
292	OC(CCC(C)C)OCC1=CN(N=N1)[C@H1]2CCC3=CC(OC)=C(OC)C(OC)=C3C4=CC=C(NC)C(=O)C=C24
293	OC1(CCCCC1)C=2N=NN(C=2)[C@H1]3CCC4=CC(OC)=C(OC)C(OC)=C4C5=CC=C(NC)C(=O)C=C35
294	O=CCN(CC=C)N(OCC)O[C@H1]1CCC2=CC(OC)=C(OC)C(OC)=C2C=CC=C(NC)C(=O)C=C1
295	N([C@@H1]1C=2CC3=C(C(OC)=C(OC)C=C3CC1)OC=CC=C(NC)CC=2)=O
296	OC(CCC(C)C)OCC1=CN(N=N1)[C@H1]CCC2=CC(OC)=C(OC)C(OC)=C2C=CC=C(C(C)N)C
297	COC1=C(OC)C(OC)=CC=2CC[C@@H1](C3=CC(=O)C(NC)=CC=C3C=21)N4C=C(N=N4)C5=CC=CC=C5
298	C=C1C(C2=C(C=C(OC)C(=C2OC)OC)CC[C@@H1]1N3C=C(N=N3)C4=CC=CC=C4)=CC=C(NC)C=O
299	C=C1C([C@H1](CCC2=CC(=C(OC)C(=C21)OC)OC)NCCCCCCCCCCC)C=CC(CNC)=O
300	C=C1C(C2=CC=C(C(=O)C=C2[C@H1](CC1)N3C=C(N=N3)C=CC=CC=N)C=C)OCNC(OC)=O
301	C1=C2C(C3=C(C=C(OC)C(=C3OC)OC)CC[C@@H1]2N4C=C(N=N4)C5=CC=CC=C5)=CC=C(NC)C1=O
302	OC1=C(C=CC=C1)C=2N=NN(C=2)[C@H1]3CCC4=CC(OC)=C(OC)C(OC)=C4C5=CC=C(NC)C(=O)C=C35
303	NC(=C(N=NCC(=O)CCC=C1N=CC(C(OC(C)=O)=CC=C1C2=C(OC)C)(OC)COC)C)C2CCOF
304	N1=CC=C(C2=C1)COC3=CC=C4C5=C(OC)C(OC)=C(OC)C=C5CC[C@@H1](C4=CC3=O)N2
305	NC1=CN(N=N1)[C@H1]2CCC3=C(C(OC)=C(OC)C(OC)=C3)C4=CC=C(NC)C(C=C24)=O
306	C[C@H1](CCC1=C(C(OC)=C(OC)C(OC)=C1)C2=CC=C(SC)C(=O)C=C2)C=O
307	C[C@H1](CCC1=C(C(OC)=C(OC)C(OC)=C1)C2=CC=C(C(C=C2)=O)SCNC=O)COC
308	C[C@H1](CCC1=C(C(OC)=C(OC)C(OC)=C1)C2=CC=C(SC)C(=O)C=C2)OC
309	NC1=C(N=NC1C(=O)CCC=CC=C2C3=C(OC)C(OC)=C(OC)C=C3CC[C@H1](CC2N)CN)C=O
310	C=CC=C(COCO)ON(OCC)C=O
311	C[C@@H1](C1=CC(C(SC)=CC=C1C2=C(OC)C(OC)=C(OC)C=C2CCNCC)=O)NC(=O)C
312	C[C@@H1](C1=CCC(SC)=CC=C1C2=C(OC)C(OC)=C(C=C2CC)OCOCC=CCSC=O)O
313	N=C=C(N=NC(C(C)OC)[C@H1]CCC1=CC(OC)=C(OC)C(OC)=C1C2=CC=C(NC)C=O)C=C2
314	COC1=C(OC)C(OC)=CC=2CC[C@@H1](C3=CC(=O)C(NC)=CC=C3C=21)N4C=C(N=N4)C5=CC=CC=N5
315	C=C1C(C2=C(C(=C(OC)C=C2CC[C@@H1]1N3C=C(N=N3)C4=CC)CC)N4O)COC=CC=C(CON)C
316	C=C1C(C2=CC=CC(=O)C=C2[C@@H1](N3C=C(N=N3)C4=CC=CC=N4)CC1)NC=C(OC)C(OC)SCOC
317	C1=C2C(C3=C(C=C(OC)C=C3CC[C@@H1]2N4C=C(N=N4)C=CC)OCOC)OC=CC=C(C1=O)C
318	C=C1C([C@H1](CCC2=CC(=C(OC)C(=C21)OC)OC)NCCCCCCCCCCC)C=CCC(NC)=O
319	C=1=C2C(C3=C(C=C(OC)C=C3CC[C@@H1]2N4C=C(N=N4)C=CC)OCOC)OC=CC=CC=1O
320	C1=C2C(C3=CC=CC(=O)C=C3[C@H1](CC2)N4C=C(N=N4)C=CC=CC=N)(OC)C(OC)=C1OCNC
321	C=C1C2(C3=C(C=C(OC)C=C3CC[C@@H1]1N4C=C(N=N4)C=CC)OCOC)OC=CC=C(NC)C2=O
322	C1=C2C(C3=C(C=C(OC)C=C3CC[C@@H1]2N4C=C(N=N4)C=CC)OCOC)OC=CC=C(C1=O)NC
323	C=C1C(C2=C(C=C(OC)C=C2CC[C@@H1]1N3C=C(N=N3)CCC)COCO)C=CC=C(NC)C=O
324	COC1=C(OC)C(OC)=CC=2CC[C@@H1](C3=CC(=O)C(NC)=CC=C3C=21)N4C=C(N=N4)COCC5=CC=CC=C5
325	C=C1C(C2=CC=C(C(=O)C=C2[C@@H1](N3C=C(N=N3)C4=NC=CC=C4)CC1)NC)=C(OC)C(OC)=COC
326	C=1N([C@H1]2CCC3=C(C4=CC=C(C(C=C24)=O)NC)C(OC)=C(OC)C(=C3)OC)N=NC=1C(O)=O
327	C1=C2C(C3=CC=C(C(C=C3[C@H1](CC2)N4C=C(N=N4)C5=NC=CC=C5O)N)C=C)(C(=C1OC)OC)OC
328	C12=CC([C@@H1]1NCC3=CC=C(C)C=C3CCCC)C(SC)=CC2O
329	O=C(OC)C1=CN(N=N1)[C@H1]2CCC3=CC(OC)=C(OC)C(OC)=C3C4=CC=C(NC)C(=O)C=C24
330	O=C(OC)NCC=1N=NN(C=1)[C@@H1]2C3=CC(C(NC)=CC=C3C4=C(OC)C(OC)=C(OC)C=C4CC2)=O
331	O=C(OC)C=1N=NN(C=1)[C@H1]2CCC3=CC(OC)=C(OC)C(OC)=C3C4=CC=C(NC)C(=O)C=C24
332	O=C(OCC)CN(CCO)N[C@H1]1CCC2=CC(OC)=C(OC)C(OC)=C2C3=CC=C(NC)C(=O)C=C13
333	O=C(OCC)C1=CN(N=N1)[C@H1]2CCC3=CC(OC)=C(OC)C(OC)=C3C4=CC=C(NC)C(=O)C=C24
334	O=C(O)C=C(OC)CC=C1C(C2=C(OC)C(OC)=C(OC)C=C2C=3C[C@@H1]1N=CC=3S)C
335	O=C(O)C=C(OC)CC=C1C(C2=C(OC)C(OC)=C(OC)C=C2C=3C[C@@H1]1N=CC=3SC)=O
336	O=C(C)N[C@@H1]1CC(C2=C(C(OC)=C(OC)C=C2CC1)OC(CC)=O)=CC=C(SC)C(=O)C
337	O=C(O)C=C(OC)CC=C1C(C2=C(OC)C(OC)=C(OC)C=C2C=3C[C@@H1]1N=CC=3S)C=O
338	O=C(C)N[C@@H1]1C2=CCC(SC)=CC=C2C3=C(C(OC)=C(OC)C=C3CC1)OCOO
339	O=C(C1)N[C@@H1]2CC(C3=C(C(OC)=C(OC)C=C3CC2)OC(CC)=O)=CC=C(SC)C1=O
340	O=C(C)N[C@@H1]1C2=CCC(SC)=CC=C2C3=C(C(OC)=C(OC)C=C3CC1)OC=O
341	OC(OC(C)CC)CC(NCC1=CN(N=N1)[C@H1]C2CC3=CC(OC)=C(OC)C(OC)=C3C4=CC=CC(=O)C=C24)NC=O
342	O=CC(OOC1=C)C=CC=C1OC(=O)N[C@H1]2CCC3=CC(OC)=C(OC)C(OC)=C3C4=CC=C(NC)C(=O)C=C24
343	OC(OC(C)CC)CC=1OCCC=C2[C@H1](CCC3=C(C(OC)=C(OC)C(OC)=C3)C2=CC=1)NSC=O
344	O=C(C1=C(C(OCC)=O)N(N=N1)[C@@H1]C2=C3C(C(NC)=CC=C2C4=C(C(OC)=C(OC)C=C4CC3)OC)=O)O
345	C1[C@@H1](C2=CC(C(NC)=CC=C2C3=C(OC)C(OC)=C(C=C3C1)O)C)ONC(C(=O)O)=CNC
346	C1=2[C@H1](CCC3=CC(OC)=C(OC)C(OC)=C3C1=CC=C(C(=O)C=2)NCO)C(C(OC)=O)NC(=O)CNC
347	C1[C@@H1](C2=CC(C(NC)=CC=C2C3=C(OC)C(OC)=C(C=C3C1)O)C)NC(C(O)=O)=CC(=O)ONC=O
348	C1[C@@H1](C2=CC(C(SC)=CC=C2C3=C(OC)C(OC)=C(C=C3C1)O)C)NC(C(O)=O)=C(COCC)OOSC=O
349	CN([C@H1]1CC2=CC(OC)=C(OC)C(OC)=C2C=C3C=C)NC(=O)C=C13
350	C=12N(N=NC=1C(OCC3=CC=C(C=C3)F)=O)C(OC)=C(OC)C(OC)=CC4=CC=C(C(=O)C=C24)NC
351	C1=CC1(C=CN(COC(OC)=O)N=NN)[C@H1]C2CC3=CC(OC)=C(OC)C(OC)=C3C=CC=C(NC)C(=O)C=C2
352	O=C(C1=C(C(OCC)=O)N(N=N1)[C@@H1]C2=C3CC(NC)=CC=C2C4=C(C(OC)=C(OC)C=C4CC3)OC)OO
353	C=1N(N=NC=1C(=O)OCC2=CC=C(C=C2)F)CC(OC)=C(OC)C(OC)=CC3=CC=C(NC)C(=O)C=C3
354	O=CC1=C(C(OCC)=O)N(N=N1)[C@@H1]C2=C3C(C(NC)=CC=C2C4=C(C(OC)=C(OC)C=C4CC3)OC)=O
355	C1[C@@H1](C2=CC3(C(SC)=CC=C2C4=C(OC)C(OC)=C(C=C4C1)O)C)NC(C(O)=O)=C(C3)ONC
356	N([C@@H1]1CCC2=CC(OC)=C(OC)C=C2CC1)=CC=C(C=C)NC
357	O=C(C(Cl)Cl)NC(=O)N[C@H1]1CCC2=C(C(OC)=C(OC)C(OC)=C2)C3=CC=C(NC)C(=O)C=C13
358	O=C(C(Cl)Cl)NCC1=CN(N=N1)[C@H1]2CCC3=CC(OC)=C(OC)C(OC)=C3C4=CC=C(C(=O)C=C42)NCCO
359	O=C(C(Cl)Cl)NC(=O)N[C@H1]1CCC2=C(C(OC)=C(OC)C(OC)=C2)C3=CC=C(C(C=C31)=O)NCC(=O)OC
360	O=C(C(Cl)Cl)NC(=O)N[C@H1]1CCC2=C(C(OC)=C(OC)C(OC)=C2)C3=CC=C(NC)C(=O)C=C31
361	O=COCCC
362	O=C(O)C=C(C(OCC)=O)N=NN[C@H1]1CCC2=CC(OC)=C(OC)C(OC)=C2C3=CC=C(NC)C(=O)C=C13
363	O=C(O)C1=C(C(OCC)=O)N=NN1[C@H1]2CCC3=CC(OC)=C(OC)C(OC)=C3C4=CC=C(NC)C(=O)C=C24
364	O=C(C)N[C@@H1]C1=C2C(C(SC)=CC=C1C3=C(C(OC)=C(OC)C=C3CC2)OC(C(C)C)=O)C=O
365	O=C(OCC)C1=CN(N=N1)[C@H1]2CCC3=CC(OC)=C(OC)C(=C3C4=CC=C(NC)C(C=C42)=O)OCC
366	O=C(C)N[C@@H1]C1=C2C(C(SC)=CC=C1C3=C(C(OC)=C(OC)C=C3CC2)OC(C4=CC=CC=C4)=O)SC=O
367	O=C(C(C)C)OC=1C(C=C2[C@H1](CCC3=CC(OC)=C(OC)C(OC)=C3C2=CC=1N)C(C)=O)SC=O
368	O=C(O)C1=CN(N=N1)[C@H1]2CCC3=C(C(OC)=C(OC)C(OC)=C3)C4=CC=C(C(=O)C=C42)NCC
369	O=C(O)C1=C(C(OCC)=O)N=NN1[C@H1]CCC2=CC(OC)=C(OC)C(OC)=C2C3=CC=C(C(C=C3)=O)NC
370	O=C(C(C)C)OCC(C=C1[C@H1](CCC2=CC(OC)=C(OC)C(O)=C2C1=CC=O)C(C)=O)C=O
371	O=C(C(C)C)OC=1C(C=C2[C@H1](CCC3=CC(OC)=C(OC)C(OC)=C3C2=CC=1S)C(C)=O)OC
372	O=C(O)C=C(OC)C(C(NC)=CC=C1C2=C(OC)C(OC)=C(OC)C=C2CC[C@@H1](C1)NCC)=O
373	O=C(O)C1=CN(N=N1)[C@H1]2CCC3=C(C(OC)=C(OC)C(OC)=C3)C4=CC=C(C(C=C42)=O)NCC
374	CCCCCCCCCCCCCCCC(=O)OCC1=CN(N=N1)[C@H1]2CCC3=CC(OC)=C(OC)C(OC)=C3C4=CC=C(NC)C(=O)C=C24
375	CCCCCCCCCCCCCCCC(OCC1=CN(N=N1)[C@H1]C2CC3=CC(OC)=C(OC)C(OC)=C3C4=CC=C(C(=O)C=C24)NC)=O
376	CCCCCCCCCCCCCCCC(OCC1=CN(N=N1)[C@H1]2CCC3=CC(OC)=C(OC)C(OC)=C3C4=CC=C(C(C=C24)=O)NC)=O
377	CCCCCCCCCCCCCCCC=1OCCC=C2[C@H1](CCC3=C(C(OC)=C(OC)C(OC)=C3)C2=CC=1)NSC=O
378	OC(=O)C1=C(C(OCC)=O)N=NN1[C@H1]CCC2=CC(OC)=C(OC)C(OC)=C2C3=CC=C(NC)C(C=C3)=O
379	C123[C@H1](OC1)ON=NN(OC(CCNC(=O)OCC(C)CN)=O)CC(OC)=CCC2=CC=CC3C
380	C[C@H1](NCC)CC1=CCC(NC)=CC=C1C2=C(C=C(OC)C(OC)=C2OCC3=CC=CC=C3)OSC
381	C1[C@H1](OC1)CCC(C)NN=N[C@H1]C=C(OCCCNC(=O)OC(C)(C)C)ONC=CC(C(O)=CCC2=CC=CNC)CC=C2COCOCCC
382	C1[C@H1](OC1)O[C@@H1]([C@H1]O)COOCNC2(N=NC(=C2)C=CC3=C(C=CC4=C3)Cl)CC(OC)=C(OC)C=C4CCNC=O
383	OC(=O)C1=C(C(OCC)=O)N(N=N1)[C@H1]C2CC3=CC(OC)=C(OC)C(OC)=C3C4=CC=C(NC)C(=O)C=C42
384	C1[C@H1](OCCC)CC2=CC(C(NC)=CC=C2C3=C(C(OC)=C(OC)C=C3CC1)OC(OCC)=O)NC=O
385	C1=C(OC)C=C(OC)C=C1CC[C@H1](C=CC(C(OC(C2=CC=CC=C2)=O)=CC=CC)=O)C
386	C1[C@H1](OCCC2)CCC=C(C=C2OC)C=C1NCOCC=CC=CCl
387	N(C)C(=O)NCCC(OCC1=CN(N=N1)[C@H1]CCC2=CC(OC)=C(OC)C(OC)=C2C3=CC=C(C(=O)C=C3)N)C=O
388	C1[C@H1](OC1)CCCl
389	C1[C@H1](OC1)OCOC(=S)N[C@H1]C2CC=C3C(OC)=C(OC)C(OC)C=C3C=4C2=CC(=O)C(=CC=4)NCC=C
390	C1[C@H1](NCC)C2C=CC(OC)=C(OC)C=C2CC[C@H1]C3=CCC(OC(OCC)=O)=CC=C31
391	C12=C(OC)C=C(OC)C=C1CC[C@H1](NC(C(O)=O)(C)C2=CC=C(NC)C)CON=COC
392	N(C)CNCC1=CN(N=N1)[C@H1]2CCC3=CC(OC)=C(OC)C(OC)=C3C4=CC=C(C(C=C24)=O)NC=O
393	OC(=O)C=C(C(OCC)=O)N(NCCC)N[C@H1]1CCC2=CC(OC)=C(OC)C(OC)=C2C3=CC=C(NC)C(=O)C=C31
394	C[C@H1](NCC)CC1=CC(C(NC)=CC=C1C2=C(C=C(OC)C(OC)=C2OCC3=CC=CC=C3)OSCC)=O
395	C1[C@H1](OC1)OOC(O)(C)CN=CN([C@@H1]2C3=CC(C(SC)=CC=C3C4=C(OC)C(OC)=C(C=C4CC2)O)O)C=O
396	C12=C(OC)C=C(OC)C=C1CC[C@H1](NC(C(O)=O)(C)C2=CC=C(NC)C)COCNCOC
397	C=1C(C)(C)OC(=O)/N=C(/N[C@H1]2CCC3=C(C(OC)=C(OC)C(OC)=C3)C4=CC=C(NC)C(=O)C=C24)N=1
398	CC(C)(C)OC(=O)/N=C(\NC(=O)OC(C)(C)C)N[C@H1]1CCC2=CC(OC)=C(OC)C(OC)=C2C3=CC=C(C(C=C13)=O)NC
399	CC(C)(C)OC(=O)/N=C(\NC(=O)OC(C)(C)C)N[C@H1]1CCC2=CC(OC)=C(OC)C(OC)=C2C3=CC=C(C(=O)C=C13)NC
400	CC(C)(C)OC(=O)/N=C(\NC(=O)OC(C)(C)C)N[C@H1]1CCC2=CC(OC)=C(OC)C(OC)=C2C3=CC=C(NC)C(=O)C=C13
401	C=1C(C)(C)OC(=O)/N=C(/N[C@H1]2CCC3=C(C(OC)=C(OC)C(OC)=C3)C4=CC=C(C(C=C42)=O)NC)N=1
402	N1=NN1[C@@H1]2C3=CC(C(NC)=CC=C3C4=C(C(OC)=C(OC)C=C4CC2)OC)=O
403	CNCC1C=CC=C(C=C1)NC(=O)N[C@@H1]2C3=CC(C(NC)=CC=C3C4=C(OC)C(OC)=C(C=C4CC2)OC)=O
404	CNC=CC=C1C[C@H1](CCC2=CC(OC)=C(OC)C(=C21)OC)N3C(C(O)=O)=C(N=N3)C(=O)OOSC
405	CNC=1CC=C2[C@H1](CCC3=C(C(OC)=C(OC)C(=C3)OC)C2=CC=1)NC(C(=O)O)=CC=CNC=O
406	CNC=1CC2=C3[C@H1](CCC4=C(C(OC)=C(OC)C(=C4)OC)C3=C5C=1)NC(C(=O)O)=C5ON2
407	N=NN([C@H1]1CCC2=C(C(OC)=C(OC)C(OC)=C2)C3=CC=C(C(=O)C=C13)NC)COOCCOC=O
408	CNCC1C=C2[C@H1](CCC3=C(C(OC)=C(OC)C(=C3)OC)C2=CC=C1)NCOC(C4=CC=NC=C4)=O
409	O=CC=CC=CC(NCC1=CN(N=N1)[C@H1]2CCC3=CC(OC)=C(OC)C(OC)=C3C4=CC=C(C(C=C24)=O)NC)=O
410	O=CC=CCC1=CN(N=N1)C(OC(C)(C)C)=O
411	O=CC=CC=CC(NCC1=CN(N=N1)[C@H1]2CCC3=CC(OC)=C(OC)C(OC)=C3C4=CC=C(NC)C(=O)C=C24)O
412	CNC=1CC=C2[C@H1](CCC3=C(C(OC)=C(OC)C(OC)=C3)C2=CC=1)NC(C(=O)O)=CC=CNC=O
413	N=NN([C@H1]1CCC2=C(C(OC)=C(OC)C(OC)=C2)C3=CC=C(C(=O)C=C13)NC)COCC=COCOCC
414	C12=C3C(C=4C([C@@H1](NCC5=CC=C(C)C=C5CCC1)C2)=CC(=O)C(=CC=4)SC=C)(OC)C(=C3OC)OC
415	C1=C2C(C3=C(CC[C@@H1]2N4N=NC(=C4)C5(O)CCCCC5)C=C(C(OC)=C3OC)OC=C)C=C(C1=O)O
416	C1=C2C(C=C(CC[C@@H1]2N3C=C(N=N3)COCC4=CC=CC=C4)C=C(C(=COC)OC)OC)=CC=C(NC)C1=O
417	C1=C2C(C3=CC=C(C(=O)C=C3[C@H1](CC2)N4C=C(N=N4)COC(=O)C5=CC=NC=C5)COC)C(OC)=C1OCNC=O
418	C12=C3C(CC([C@@H1](NCC4=CC=C(C)C=C4CCC1)C2)=CC(=O)C(=CC)SC=C)(OC)C(=C3OC)OC
419	COC1=C(OC)C(OC)=CC=2CC[C@@H1](C3=CC(=O)C(NC)=CC=C3C=21)N4C=C(N=N4)COC(=O)C5=CC=NC=C5
420	C1=C2C(CC([C@@H1]1NCCCCCCCCCCCCCCCC)C(=CC2)SC=COC)C(OC)=COC
421	CN(N([C@@H1]1C2=CC(=O)C(NC)=CC=C2C3=CC(=C(OC)C=C3CC1)OC)O)CNC(=S)CCCCC
422	C=C1C(C=C(CC[C@@H1]1N2N=NC(=C2)C3=CC=C(Cl)C=C3)C=C(C(OC)=COC)OC)=CC=C(C=O)NC
423	CC(C)C(=O)NCC1=CN(N=N1)[C@H1]2CCC3=CC(OC)=C(OC)C(OC)=C3C4=CC=C(NC)C(=O)C=C24
424	CC(C)C(=O)OCC1=CN(N=N1)[C@H1]2CCC3=CC(OC)=C(OC)C(OC)=C3C4=CC=C(NC)C(=O)C=C24
425	CC(C)C=1OCCC=C2[C@H1](CCC3=C(C(OC)=C(OC)C(OC)=C3)C2=CC=1)NSC=O
426	CC(C)(O)C1N=NN(CN1CC[C@H1]2CC)C3=CC(OC)=C(OC)C(OC)=C3C4=CC=C(C(C=C24)=O)NC
427	N(C(C1=CC=NC=C12)=O)[C@@H1]3CC(C4=C(C(OC)=C(OC)C=C4CC3)OC(OC)=O)=CC=C(SC)C2=O
428	N(C(C1=CC=NC=C1)=O)[C@@H1]2C=3C(C4=C(C(OC)=C(OC)C=C4CC2)OC)=CC=C(SC)C(=O)C=3
429	C=[C@H1]COCCCCCCC
430	C12=C(C(=C(OC)C(OC)=C1)O)CC3=CC=C(NC)CC=C3[C@H1](CC2)NC(C)=O
431	N1(CCCC1)CN[C@H1]2CCC3=C(C(OC)=C(OC)C(OC)=C3)C4=CC=C(SC)C(=O)C=C24
432	C1[C@H1](NC(O)=O)C2=CCC=CC=C2C3=C(OC)C(OC)=C(OC)C=C3CC=C1SC=O
433	N1(CCCC1)C(=O)OC2=C(OC)C(OC3)=CC=C2C4=CC=C(SC)C(C=C4[C@@H1](NC(=O)C)CC3)=O
434	C=CC(=O)OCCC=C1[C@H1](CCC2=C(C(OC)=C(OC)C(OC)=C2)C1=CC)N=O
435	N(C(C1=CC=NC=C1)=O)[C@@H1]2C=3C(C4=C(C(OC)=C(OC)C=C4CC2)OC=C)C=C(SC)C(=O)C=3
436	C12=CC(OC)=C(OC)CCC([C@H1](CCCC=C1OC)NC(C)=O)(OC(=O)OC)C2=O
437	C1[C@H1](NC(O)=O)C=CCC(SC)=CCC=C(C2=C(OC)C(OC)=C(OC)C=C2CC1)SC=O
438	C12=C(C(OC)=C(OC)CCC([C@@H1]2CCC(C)C1N=C)=O)OSC
439	C=CC(OC)=C(OC)CC1=CC=C(NC)CC=C1[C@@H1](NC(N(CCO)CCO)=S)CCCNC=O
440	CNC=1C(=O)C=C2[C@H1](CCC3=CC(OC)=C(OC)C(OC)=C3C2=CC=1)NC4(C(=O)O)C=CN=N4
441	CNC=1C(=O)C=C2[C@H1](CCC3=CC(OC)=C(OC)C(OC)=C3C2=CC=1N)C4(C(=O)O)C=CN=N4
442	N1=CC=CC2=C1C(OC=CC(OC=3)=CCCC[C@H1](NC(C)=O)C4=CCC(SC)=CC=C4C=32)C
443	N=1N(C=C(CNC(C(C)C)=O)N=1)[C@H1]CCC2=C3C(OC)=C(OC)C(OC)=C2C=CC=C(CC=CC=C3)CC
444	NN(C=C(CNC(C1CCCCl)=O)N=N)[C@H1]CCC2=CC(OC)=C(OC)C(OC)=C2C3=CC=C(C(=O)C=C13)NC
445	CNC=1C(=O)C=C2[C@H1](CCC3=C(C(OC)=C(OC)C(OC)=C3)C2=CC=1)NC(C)=O
446	C1=CN=CC(=C1CC)C=O
447	N=1N(C=C(CNC(C(C)C)=O)N=1)[C@H1]2CCC3=CC(OC)=C(OC)C(OC)=C3C4=CC=C(C(=O)C=C24)NC
448	C=C1[C@H1](CCC2=C(C(OC)=C(OC)C(OC)=C2)C1=CC=CC(C)=O)NCNC(C)=O
449	N=1N(C=C(CNC(C(C)C)=O)N=1)[C@H1]CCC2=CC(OC)=C(OC)C(OC)=C2C=CC3=CCC=CC=C3NC=O
450	C=C1[C@H1](CCC2=CC(OC)=C(OC)C(OC)=C2C1=CC=C(C(=O)C)NC)NC(C(=O)O)=CN=CNC
451	CC(C)(C)OC(=O)NCCC(NCC=1N=NN(C=1)[C@H1]C2CC3=CC(OC)=C(OC)C(OC)=C3C4=CC=C(C(=O)C=C24)N)C=O
452	C1C(C)(C)OC/N=C(/N[C@H1]2CCC3=CC(OC)=C(OC)C(=C3C4=CC=C(NC)C(C=C42)=O)OC)N=N1
453	CC(C)(C)OCNCCC(=O)NCC1=CN(N=N1)[C@H1]2CCC3=CC(OC)=C(OC)C(OC)=C3C4=CC=C(C(C=C24)=O)NC=O
454	CC(C)(C)OC(=O)NCCC(OCC=1N=NN(C=1)[C@H1]2CCC3=CC(OC)=C(OC)C(OC)=C3C4=CC=C(C(C=C24)=O)NC)=O
455	C1C(C)(C)OC/N=C(/N[C@H1]2CCC3=CC(OC)=C(OC)C(=C3C4=CC=C(NC)C(C=C42)=O)OC)N1C
456	CC(C)(C)OC(=O)NCCC(OCC=1N=NN(C=1)[C@H1]C2CC3=CC(OC)=C(OC)C(OC)=C3C4=CC=C(C(=O)C=C24)NC)=O
457	CC(C)(C)OC(=O)NCCC(NCC=1N=NN(C=1)[C@H1]2CCC3=CC(OC)=C(OC)C(OC)=C3C4=CC=C(C(C=C24)=O)N)C=O
458	CNCCC1=CC=C(C=C1)NC(=O)N[C@H1]2CCC3=CC(OC)=C(OC)C(OC)=C3C4=CC=C(C(C=C24)=O)NC=O
459	N=NN([C@@H1]1C=2C(C3=C(C(OC)=C(OC)C=C3CC1)OC)=CC=C(NC)CC=2)OC(O)=O
460	N1=NN[C@@H1]2CCC3=C(C(OC)=C(OC)C=C3CC2=CC(OC)=C(OC)COC)CN1
461	O=CC=CC=CC=CNNCOC
462	O=CC=CC=CC(NCC1=CN(N=N1)[C@H1]C2CC3=CC(OC)=C(OC)C(OC)=C3C4=CC=C(C(=O)C=C24)NC)=O
463	CNCC(C1=CC=C(C=C1)NC(=O)N[C@@H1]2C3=CC(C(NC)=CC=C3C4=C(C(OC)=C(OC)C=C4CC2)OC)=O)OC
464	CNCC1C=C2[C@H1](CCC3=C(C(OC)=C(OC)C(=C3)OC)C2=CC=C1)NCOC(C4=CC=CC=C4)=O
465	N=NN([C@H1]1CCC2=C(C(OC)=C(OC)C(=C2)OC)C3=CC=C(NC)C(C=C13)=O)COC4CC=CC=C4O
466	COC1=C(OC)C(OC)=CC=2CC[C@@H1](C3=CC(=O)C(NC)=CC=C3C=21)N4C=C(N=N4)CNC(=O)C5=CC=NC=C5
467	C1=C2C(C3=CC=C(CC=C3[C@@H1](N4C=C(N=N4)CNC(=O)C(Cl)Cl)C1)ONC=C)(C(=C2OC)OC)OC
468	C12=C3C(CC([C@@H1](NCC4=CC=C(C)C=C4CCC1)C2)NN=NC=C(NC)C=O)=C=C(C(=C3)OC)OCOCC
469	C=CC(C1C([C@@H1](NCCCCCCCCCCCCCCC)CC(=O)C)(CC)SCNC=COC)C(OC)=C1OC
470	C=C1C(C=C(CC[C@@H1]1N2N=NC(=C2)CNC(=O)OCCC)CC=C(C(OC)=COC)O)C=CC=C(C=O)NC
471	C=C1C(C=C(CC[C@@H1]1N2C=C(N=N2)CNC(=O)C3=CC=NC=C3)C=CC(OC)=COC)OC=CC=C(C=O)NC
472	O(C=CC=CC1=C(OC)C(OC)=C(OC)C=C1CC[C@H1](C=CCCOCC2=CC=CC=C2)OCC)ONC
473	O=C(OC)C1=CN(N=N1)[C@H1]2CCC3=C(C(OC)=C(OC)C(OC)=C3)C4=CC=C(NC)C(=O)C=C24
474	O=C(OC)NCC1=CN(N=N1)[C@H1]2CCC3=CC(OC)=C(OC)C(OC)=C3C4=CC=C(NC)C(=O)C=C24
475	O(C=CC=CC1=C(OC)C(OC)=C(OC)C=C1CC[C@H1](C=CCCOCC2=CC=CC=C2)OSC=O)NC
476	O=C(OC)OCC1=CN(N=N1)[C@H1]2CCC3=CC(OC)=C(OC)C(OC)=C3C4=CC=C(NC)C(=O)C=C24
477	O(C=CC=CC1=C(OC)C(OC)=C(OC)C=C1C2C[C@H1](C=CCC(OCC(C)C)=O)N=C2ON)C
478	O=C(CCCCCl)NCC1=CN(N=N1)[C@H1]2CCC3=CC(OC)=C(OC)C(OC)=C3C4=CC=C(NC)C(=O)C=C24
479	O=C(OCC)NCC1=CN(N=N1)[C@H1]2CCC3=CC(OC)=C(OC)C(OC)=C3C4=CC=C(NC)C(=O)C=C24
480	O=C(C(C)C)NC(=S)N[C@@H1]1C=2C(C3=C(C(OC)=C(OC)C=C3CC1)OC)=CC=C(NC)C(=O)C=2
481	O=C(OCC)C1=CN(N=N1)[C@H1]2CCC3=C(C(OC)=C(OC)C(OC)=C3)C4=CC=C(NC)C(=O)C=C24
482	O=C(OCC)OCC=1N=NN(C=1)[C@H1]2CCC3=CC(OC)=C(OC)C(OC)=C3C4=CC=C(NC)C(=O)C=C24
483	O=C(OCC)CN(CCO)C(=S)N[C@H1]1CCC2=CC(OC)=C(OC)C(OC)=C2C3=CC=C(NC)C(=O)C=C13
484	O=C(OCC=C)NCC1=CN(N=N1)[C@H1]2CCC3=CC(OC)=C(OC)C(OC)=C3C4=CC=C(NC)C(=O)C=C24
485	CC(C)COC(NCC1=CN(N=N1)[C@H1]2CCC3=CC(OC)=C(OC)C(OC)=C3C4=CC=C(NC)C(=O)C=C24)=O
486	CC(C)CNCC1=CN(N=N1)[C@H1]2CCC3=CC(OC)=C(OC)C(OC)=C3C4=CC=C(C(C=C24)=O)NC=O
487	CC(O)(C)C1=CN(N=N1)[C@H1]2CCC3=C(C(OC)=C(OC)C(OC)=C3)C4=CC=C(C(C=C24)=O)NC
488	CC(C)COC(NCC1=CN(N=N1)[C@H1]2CCC3=CC(OC)=C(OC)C(OC)=C3C4=CC=C(C(C=C24)=O)NC)=O
489	CC(C)CNCC1=CN(N=N1)[C@H1]2CCC3=CC(OC)=C(OC)C(OC)=C3C4=CC=C(NC)C(=O)C=C24
490	CC(C)(C)OC(NCC1=CN(N=N1)[C@H1]2CCC3=CC(OC)=C(OC)C(OC)=C3C4=CC=C(C(C=C24)=O)NC)=O
491	C(=CN(C(=O)OCC)N[C@@H1]1CC=2)(C3=C(C(OC)=C(OC)C=C3CC1)OC)CC=C(NC)C(C=2)=O
492	CC(C)(C)OC(NCC1=CN(N=N1)[C@H1]2CCC3=CC(OC)=C(OC)C(OC)=C3C4=CC=C(NC)C(=O)C=C24)=O
493	COCNCC1=CN(N=N1)[C@H1]2CCC3=CC(OC)=C(OC)C(OC)=C3C4=CC=C(C(C=C42)=O)NC=O
494	C(=NC=C(NC)CC(=O)N)CC1=CN(N=N1)[C@H1]CCC2=CC(OC)=C(OC)C(OC)=C2C=CC=C(C)CNC=O
495	C(=C1N(C(=O)OCC)N12)CCC3=C(C(OC)=C(OC)C(OC)=C3)C4=CC=C(NC)C(C=C24)=O
496	CC(C)(C)OC(=O)NCC1=CN(N=N1)[C@H1]2CCC3=CC(OC)=C(OC)C(OC)=C3C4=CC=C(NC)C(=O)C=C24
497	N(C(C)C)C(NCC1=CN(N=N1)[C@H1]2CCC3=CC(OC)=C(OC)C(OC)=C3C4=CC=C(NC)C(=O)C=C24)=O
498	N(C)C1=CC=C2C3=C(OC)C(OC)=C(OC)C=C3CC[C@@H1](C2=CC1=O)NC(C(=O)O)CCON=CCF
499	N(C(C(C)C)=O)C1=CN(N=N1)[C@H1]2CCC3=C(C(OC)=C(OC)C(OC)=C3)C4=CC=C(NC)C(=O)C=C24
500	N(CCCCCCC=O)CC1=CN(N=N1)[C@H1]2CCC3=CC(OC)=C(OC)C(OC)=C3C4=CC=C(NC)C(=O)C=C24
501	C1=C(C=CC(Cl)=C1)COC(=O)CN[C@@H1]2C=3C(C4=C(C(OC)=C(OC)C=C4CC2)OC)=CC=C(SC)C(=O)C=3
502	N(C)C1=CC=C2C3=C(OC)C(OC)=C(OC)C=C3CC[C@@H1](C2=CC1=O)NC(C(=O)O)CCONC(=O)C=C
503	N(C)C1=CC=C2C3=C(OC)C(OC)=C(OC)C=C3CC[C@@H1](C2=CC1=O)NC(C(=O)O)CCONC(=O)CNC
504	N(C(C)C)CC(=O)OCC1=C2N(N=N1)[C@H1]CCC3=CC(OC)=C(OC)C(OC)=C3C4=CC=C(NC)C(C=C24)=O
505	C1#CC=C(C=C1)F
506	C[C@H1](C1OC=CN[C@@H1]2C=C(C3=CC(OC)=C(OC)C(OC)=C3C1)CC=C(NC)CC2)ONCC
507	O=C(C1=CC=CC=C1Cl)NCC2=CN(N=N2)[C@H1]3CCC4=CC(OC)=C(OC)C(OC)=C4C5=CC=C(NC)C(=O)C=C35
508	O=C(OC1=CC=CC=C1)NCC2=CN(N=N2)[C@H1]3CCC4=CC(OC)=C(OC)C(OC)=C4C5=CC=C(NC)C(=O)C=C35
509	O=C(OC(C)(C)C)NCC1=CN(N=N1)[C@H1]2CCC3=CC(OC)=C(OC)C(OC)=C3C4=CC=C(C(C=C24)=O)NC
510	C1=C2CC[C@H1](C3=CC(C(SC)=CC=C3C2C=C1O)CNC=O)CN=O
511	COC1=C2C3=CC=C(NC)C(=O)C=C3[C@H1](CCC2=CC(OC)=C1OC)NCCO
512	COC=C1C2=CC=C(NC)C(=O)C=C2[C@@H1](NCC(C)C)CCC1=CC(OC)=COC
513	C1=C2CC[C@H1](C3=CCC(SC)=CC=C3C2=C(C(OC)=C1OC)OC=O)[N-1]
514	C=C1C=2C[C@H1](CC(C3=CC(OC)=C(OC)C=C31)C=CC=CSC)C(=O)C=2N
515	COC=C1C2=CC=C(NC)C(=O)C=C2[C@@H1](NCCC)CCC1=CC(OC)=COC
516	C1OC=C2C3=CC=C(NC)C(=O)C=C3[C@H1](CCC2C=COC)NCCCCCOC=C1
517	COC1=C2C3=CC=C(NC)C(=O)C=C3[C@H1](CCC2=CC(OC)=C1OC)NCCCCCCCCCC
518	COC1=C2C3=CC=C(SC)C(=O)C=C3[C@H1](CCC2=CC(OC)=C1OC)NCCCCCCCCCC
519	C1=C2CC[C@H1](C3=CCC(NC)=CC=C3C2=C(C(OC)=C1OC)OC)ONCCC#N
520	CC(CC)N[C@H1]1CCC2=CC(OC)=C(OC)C(OC)=C2C3=CC=C(NC)C(=O)C=C13
521	CC(CC)N[C@H1]1CCC2=CC(OC)=C(OC)C(OC)=C2C3=CC=C(NC)C(=O)C=C31
522	CC(CC)N[C@@H1]1C2=CC(C(SC)=CC=C2C3=C(OC)C(OC)=C(C=C3CC1)OC)=O
523	CC(CC)N[C@@H1]C1=C2C(C(NC)=CC=C1C3=C(OC)C(OC)=C(OC)C=C3CC2)=O
524	CC(CC)N[C@@H1]1C2=CC(C(NC)=CC=C2C3=C(OC)C(OC)=C(OC)C=C3CC1)=O
525	CC(CC)N[C@@H1]1C2=CC(C(SC)=CC=C2C3=C(CC1)C=C(OC)C(OC)=C3OC)=O
526	CC(CC)N[C@@H1]1C2=CC(C(NC)=CC=C2C3=C(OC)C(OC)=C(C=C3CC1)OC)=O
527	COC1=C2C3=CC=C(NC)C(=O)C=C3[C@H1](CCC2=CC(OC)=C1OC)NC(=S)N
528	C1=C2CC[C@H1](C3=CCC(SC)=CC=C3C2=C(C(OC)=C1OC)OC=O)N=[N+1]=[N-1]
529	COC1=C2C3=CC=C(NC)C(=O)C=C3[C@H1](CCC2=CC(OC)=C1OC)NCCCCl
530	COC1=C2C3=CC=C(NC)C(=O)C=C3[C@H1](CCC2=CC(OC)=C1OC)NCC4=CC=NS4C
531	N(C)C(=O)N[C@H1]1CCC2=CC(OC)=C(OC)C(OC)=C2C3=CC=C(NC)C(C=C13)=O
532	N(CCCC)C(CN1[C@@H1]C2=CCC(O)=CC=C2C3=C(CC1)C=C(OC)C(OC)=C3OC)=O
533	C1[C@H1](NCC)CC2=CC(C(NC)=CC=C2C3=C(OC)C(OC)=C(OC)C=C3C1N)C=O
534	N(C)C=1C(=O)C=C2[C@H1](CCC3=CC(OC)=C(OC)C(OC)=C3C2=CC=1N)C(C)CCSC
535	C1=C(OC)C(OC)=C(OC=2)CC3=CC=C(SC)C1(C=C3[C@@H1](NC(N(C)C)=O)CCC=2)O
536	N(CCCC)[C@@H1]1C=2C(C3=C(C(OC)=C(OC)C=C3CC1)OC)=CC=C(NC)C(C=2)=O
537	N(C(C)=O)[C@@H1]C1=CC(C(NC)=CC=C1C2=C(OC)C(OC)=C(OC)C=C2CCNC=O)C
538	C[C@H1](OCCC)[N-1]C1=CC(C(NC)=CC=C1C2=C(C(OC)=C(OC)C=C2C)OC)NC(=O)C
539	C1=C(OC)C(OC)=C(OC)CC2=CC=C(SC)C1(C=C2[C@@H1](NC(N(C)C)=O)CCC)O
540	N1=NN([C@@H1]C2=CC(C(O)=CC=C2C3=C(CC)C=C(OC)C(OC)=C3OC)=O)CC=C1F
541	CNC=1C(C=C2[C@H1](CCC3=C(C(OC)=C(OC)C(OC)=C3)C2=CC=1)NC(C)C=O)SC
542	CNC=1C(C=C2[C@H1](CCC3=C(C(OC)=C(OC)C(OC)=C3)C2=CC=1)NC(C)C)=O
543	CNC=1C(C=C2[C@H1](CCC3=C(C(OC)=C(OC)C(OC)=C3)C2=CC=1)NC(C)C)CSCSC=O
544	CNC=1C(C=C2[C@H1](CCC3=C(C(OC)=C(OC)C(OC)=C3)C2=CC=1)NC(C)C=O)SCSC
545	C=1NC=2C(C=C3[C@H1](CCC4=C(C(OC)=C(OC)C(OC)=C4)C3=CC=2)NC(C)C)N=CN=1
546	NN([C@H1]1CCC2=CC(OC)=C(OC)C(OC)=C2C3=CC=C(NC)C(=O)C=C13)C=O
547	CNC=1C(C=C2[C@H1](CCC3=C(C(OC)=C(OC)C(OC)=C3)C2=CC=1)NC(C)C)C=O
548	N1=NC(=CN(NC1)C=CC2(CC[C@H1](N)C3=CC(C(NC)=CC=C32)=O)CCOC)COC=C
549	N1=NC(=C2N(NC1)C=CC3=CC4=C(OC)C(OC)=CC=C4CC[C@H1](NC(N)=O)C3=C2)OC=O
550	N1=NC(=CN(N=N1)[C@H1]2CCC3=CC(OC)=C(OC)C(OC)=C3C4=CC=C(C(C=C42)=O)N)C
551	OCCN(CC=C)C(=O)N[C@@H1]1C2=CC(C(NC)=CC=C2C3=C(OC)C(OC)=C(OC)C=C3CC1)=O
552	N1=NC=CN(NC1)C=CC=C2C3=C(OC)C(OC)=C(OC)C=C3CC[C@@H1](C2=C)NC=CC=C
553	N1=NC=CN(N=N1)[C@H1]2CCC3=CC(OC)=C(OC)C(OC)=C3C4=CC=C(NC)C(=O)C=C24
554	N1=NC=CN(NC1)[C@H1]2CCC3=CC(OC)=C(OC)C(OC)=C3C4=CC=C(NC)C(=O)C=C24
555	N1=NC(=CN(NC12)C=CC3=C(O)C(OC)=C(OC)C=C3CC[C@H1](N)C4=CCC(NC)=CC=C24)OC
556	N1=NC(=CN(NC1)C=CC2=C(O)C(OC)=C(OC)C=C2CC3[C@H1](N)C=CCC(NC)=CC=C3)OC
557	OCCN(CC=C)C(=S)N[C@H1]1CCC2=CC(OC)=C(OC)C(OC)=C2C3=CC=C(NC)C(=O)C=C13
558	COC1=C(OC)C(OC)=CC=2CC[C@@H1](C3=CC(C(=CC=C3C1=2)NC)=O)NCCC(F)(F)F
559	CNC(N(C)C)CN[C@H1]1CCC2=CC(OC)=C(C(OC)=C2C=3C1=CC(=O)C(=CC=3)NC)OC
560	C1=C2C([C@H1](CCC3=CC(OC)=C(C(=C32)OC)OC)NCCC=CC)(C(SC)=C1)O
561	COC1=C(OC)C(OC)=CC=2CC[C@@H1](C3=CC(C(=CC=C3C1=2)NC)=O)NCC4=CC=CC=C4
562	C=C1C([C@H1](CCC2=CC(OC)=C(C(OC)=C12)OC)NCC=CC=O)C(=CC)NC
563	C12=CC(C(SC)=CC=C1C3=C(CC[C@@H1]2NCC4=CC=NC=C4)C=C(OC)C(OC)=C3O)C=O
564	COC1=C(OC)C(OC)=CC=2CC[C@H1](NCC3=CC=CS3)C4=CC(=O)C(NC)=CC=C4C1=2
565	C12=CC(C(SC)=CC=C1C3=C(CC[C@@H1]2NCC4=CC=NC=C4)C=C(OC)C(OC)=C3OC)=O
566	C12=CC(C(NC)=CC=C1C3=C(OC)C(=C(C=C3CC[C@@H1]2N4CC=CC=C4)O)CO)C=O
567	C12=CC(C(NC)=CC=C1C3=C(OC)C3=C(CCC[C@@H1]2NCC=CC)CS)OC=O
568	COC1=C(OC)C(OC)=CCCC[C@H1](NCC2=CC=CS2)C3=CC(=O)C(NC)=CC=C3C1
569	C12=CC(C(SC)=CC=C1C3=C(OC)C(=C(C=C3CC[C@@H1]2N4CC=CC=C4)O)CO)C=O
570	COC=C(OC)C(OC)=C1CCC[C@H1](NCC(C)C)C2=CC(=O)C(SC)=CC=C2C1
571	NC(N(CC)OC)N[C@H1]1CCC2=CC(OC)=C(OC)C(OC)=C2C=3C1=CC(=O)C(=CC=3)NC
572	C1[C@H1](C2=CC(C(SC)=CC=C2C3=C(OC)C(=C(OC)C=C3C1)OC)=O)NC(=O)C
573	NC(=O)N[C@@H1]C1=CC(C(NC)=CC=C1C2=C(OC)C(OC)=C(OC)C=C2CC)=O
574	N1C(C(CCC)=C)N1[C@H1]2CCC3=CC(OC)=C(OC)C(OC)=C3C4=CC=C(C(=O)C=C24)NC
575	C1[C@H1](C2=CC(C(NC)=CC=C2C3=C(OC)C(=C(OC)C=C3C1)OC)=O)NCC
576	NC(=O)N[C@H1]1CCC2=CC(OC)=C(OC)C(OC)=C2C3=CC=C(NC)C(=O)C=C13
577	C12=CC=C(NC)C2C=C1[C@@H1](NC(C)=O)CCC=CC(OC)=C(OC)C(OC)=C
578	C[C@H1](CCC1=CC(OC)=C(OC)C(OC)=C1C2=CC=C(C(=O)C=C2)SC)NC(=O)C
579	C1[C@H1](C2=CC(C(SC)=CC=C2C3=C(OC)C(=C(OC)C=C3C1)OC)=O)NCC
580	NC(=O)N[C@@H1]1C2=CC(C(NC)=CC=C2C3=C(OC)C(OC)=C(C=C3CC1)OC)=O
581	NC(CCN=N[C@H1]1CCC2=CC(OC)=C(OC)C(OC)=C2C3=CC=CC(=O)C=C13)NCC
582	C[C@H1](CCC1=CC(OC)=C(OC)C(OC)=C1C2=CC=C(SC)C(=O)C=C2)CC
583	C1=2[C@H1](CCC3=CC(OC)=C(OC)C(OC)=C3C1=CC=C(NC)C(=O)C=2NC)C=O
584	C=C1C2=C(OC)C(OC)=C(OC)C=C2CC[C@H1](NC(C=3)=O)C1=CC=C(C(C=3)=O)SC
585	C=C1C2=C(OC)C(OC)=C(OC)C=C2CC[C@H1](NC(N)=O)C1=CC=C(NC)C(=O)C
586	C1[C@@H1](C2=CC(C(NC)=CC=C2C3=C(OC)C(OC)=C(C=C3C1)OC)=O)NCC
587	C1[C@H1](CC(C2=CC(OC)=C(OC)C=C21)C=CC=C(NC)CC)ON
588	C12=CC3=C(OC)C(OC)=C(OC)C=C3CC[C@H1](NC(N)=O)C=C1C=C(OC)C(=C2)OO
589	C=C1C2=C(OC)C(OC)=C(OC)C=C2CC[C@H1](NC(C)=O)C1=CC=C(C(C)=O)SC
590	C1[C@@H1](C2=CC(C(NC)=CC=C2C3=C(OC)C(OC)=C(OC)C=C3C1=O)N)C(=O)C
591	C1=2[C@H1](CCC3=CC(OC)=C(OC)C(OC)=C3C1=CC=C(C(C=2)=O)SCNC)C=O
592	C1=2[C@H1](CCC3=CC(OC)=C(OC)C(OC)=C3C1=CC=C(SC)C(=O)C=2NC)C
593	C1[C@@H1](C2=CC(C(SC)=CC=C2C3=C(OC)C(OC)=C(C=C3C1)OC)=O)NC(=O)C
594	C1=2[C@H1](CCC3=CC(OC)=C(OC)C(OC)=C3C1=CC=C(C(C=2)=O)SCN)C(=O)C
595	NC(=O)N[C@@H1]1C2=CC(C(NC)=CC=C2C3=C(C(OC)=C(OC)C=C3CC1)OC)=O
596	NC(=O)N[C@@H1]C1=C2C(C(NC)=CC=C1C3=C(OC)C(OC)=C(OC)C=C3CC2)=O
597	CC(C)NC(=O)N[C@@H1]1C2=CC(C(NC)=CC=C2C3=C(OC)C(OC)=C(OC)C=C3CC1)=O
598	CC(C)CN[C@H1]1CCC2=C(C(OC)=C(OC)C(OC)=C2)C3=CC=C(SC)C(=O)C=C13
599	CC(C)NC(=O)N1[C@@H1]C2=CC(C(NC)=CC=C2C3=C(OC)C(OC)=C(OC)C=C3CC1)=O
600	CC(N)(CCO)[C@H1]1CCC2=CC(OC)=C(OC)C(OC)=C2C3=CC=C(SC)C(=O)C=C13
601	CC(C)CN[C@H1]1CCC2=C(C(OC)=C(OC)C(OC)=C2)C3=CC=C(SC)C(=O)C=C31
602	CC(N)(CCO)[C@H1]1CCC2=CC(OC)=C(OC)C(OC)=C2C3=CC=C(C(C=C31)=O)NCC
603	CC(C)NC(=O)N[C@@H1]C1=CC(C(NC)=CC=C1C2=C(OC)C(OC)=C(OC)C=C2CC)=O
604	C1#CC(C=C2[C@H1](CCC3=CC(OC)=C(OC)C(OC)=C3C2=C1N)C(C)=O)=C
605	C1[C@H1](NC(C)=O)C2=CC(C(NC)=CC=C2C3=C(OC)C(OC)=C(C=C3C1)OCNC)=O
606	C12=C(C2C=C3[C@H1](CCC4=CC(OC)=C(OC)C(OC)=C4C3=C1N)C(C)=O)OSC
607	C1[C@H1](NC(C)=O)C2=CC(C(SC)=CC=C2C3=C(OC)C(OC)=C(C=C3C1)OCNC)=O
608	C12=C(C(C=C3[C@H1](CCC4=CC(OC)=C(OC)C(OC)=C4C3=C1N)CC)=O)C2=O
609	C1=CN=NN1[C@H1]2CCC3=CC(OC)=C(OC)C(OC)=C3C4=CC=C(NC)C(=O)C=C42
610	N1(CC2=CC=CN=C23)C=CC(C4=CN(OC)C=C3CC[C@H1](C4)C=C)CC(OC)=COC=C1
611	C1[C@H1](NC(C)=O)C2=CCC(NC)=CC=C2C3=C(OC)C(OC)=C(OC)C=C3C1=O
612	C=C(N[C@H1]1CCC2=C(C(OC)=C(OC)C(OC)=C2)C3=CC=C(SC)C(C=C31)=O)C
613	C1=CC(=CC=N1)CN[C@H1]2CCC3=CC(OC)=C(OC)C(OC)=C3C4=CC=C(NC)C(C=C42)=O
614	C=12C=C(NC=3)CC4=CC=1CC=C2[C@H1](CCC=3C=C(OC)C(OC)=C4O)CNC(=O)CSCSC=O
615	CCN(CC)C(=O)N[C@H1]1CCC2=CC(OC)=C(OC)C(OC)=C2C3=CC=C(NC)C(=O)C=C31
616	C1[C@H1](NC(C)=O)C2=CCC(SC)=CC=C2C3=C(OC)C(OC)=C(OC)C=C3C1NC=O
617	C=1C=C(NC)CC=C2C=1C3=C(OC)C(OC)=C(OC)C=C3CC[C@@H1]2NC(C)=O
618	CCN(CC)C(=O)N[C@@H1]1C2=CC(C(NC)=CC=C2C3=C(OC)C(OC)=C(OC)C=C3CC1)=O
619	C=12C=C(NC=3)CC4=CC=1CC=C2[C@H1](CCC=3C=C(OC)C(OC)=C4O)CNC=O
620	CC(C)N(C(C)C)C(=O)N[C@@H1]1C2=CC(C(NC)=CC=C2C3=C(C(OC)=C(OC)C=C3CC1)OC)=O
621	CC(C)N(C(C)C)C(=O)N[C@@H1]C1=CC(C(NC)=CC=C1C2=C(OC)C(OC)=C(OC)C=C2CC)=O
622	CC(C)N(C(C)C)C(=O)N[C@@H1]1C2=CC(C(NC)=CC=C2C3=C(OC)C(OC)=C(OC)C=C3CC1)=O
623	C1C(C)NC1N[C@H1]2CCC3=CC(OC)=C(OC)C(OC)=C3C4=CC=C(C(=O)C=C42)NC=O
624	CC(C)COC1=C(OC)C(OC)=CC=2CC[C@H1](NC(=O)C)C3=CCC(SC)=CC=C3C=21
625	O=C(N[C@H1]1CCC2=CC(OC)=C(OC)C(OC)=C2C3=CC=C(NC)C(=O)C=C31)N(S)CC
626	O=C(N[C@H1]1CCC2=CC(OC)=C(OC)C(OC)=C2C3=CC=C(NC)C(=O)C=C31)N4CCOCC4
627	O=C(N[C@H1]1CCC2=CC(OC)=C(OC)C(OC)=C2C3=CC=C(NC)C(=O)C=C13)N4CCOCC4
628	O=C(N[C@H1]1CCC2=CC(OC)=C(OC)C(OC)=C2C3=CC=C(NC)C(=O)C=C13)CCOCC
629	O=C(N[C@H1]1CCC2=CC(OC)=C(OC)C(OC)=C2C3=CC=C(NC)C(=O)C=C31)CCOCC
630	O=C(N[C@H1]1CCC2=CC(OC)=C(OC)C(OC)=C2C3=CC=C(NC)C(=O)C=C31)N(C)C
631	COC1=C2C3=CC=C(NC)C(=O)C=C3[C@H1](CCC2=CC(OC)=C1OC)NC(=O)NC4=CC=CC=C4
632	COC1=CC2=CC=C(NC)C(=O)C=C2[C@@H1](NC(=O)NC3=CC=C(F)C=C3)CCC=CC(OC)=C1OC
633	COC1=C2C3=CC=C(NC)C(=O)C=C3[C@@H1](NC(=O)NC4=CC=C(Cl)C=C4)CCC2=CC(OC)=C1OC
634	COC1=C2C3=CC=C(NC)C(=O)C=C3[C@H1](CCC2=CC(OC)=C1OC)NC(=O)N(CCCCCl)O
635	COC=C1C2=CC=C(NC)C(=O)C=C2[C@@H1](NC(=O)NC3=CC=C(F)C=C3)CCC1C=C(OC)C=COC
636	COC=CC1=CC=C(NC)C(=O)C=C1[C@@H1](NC(=S)NC2=CC=CC=C2)Cl
637	N=1C(=CN(N=1)[C@H1]2CCC3=CC(OC)=C(OC)C(OC)=C3C4=CC=C(NC)C(=O)C=C42)C=O
638	C[C@H1](CCC1=C(C(OC)=C(OC)C(OC)=C1)C2=CC=C(C(C=C2)N)C=O)CC=O
639	C1=2[C@H1]CCC3=CC(OC)=C(OC)C(OC)=C3C1=CC=C(C(C=2)=O)SCNC(C)=O
640	N=1C=CN(N=1)[C@H1]2CCC3=CC(OC)=C(OC)C(OC)=C3C4=CC=C(NC)C(=O)C=C42
641	C[C@H1](CCC1=C(C(OC)=C(OC)C(OC)=C1)C2=CC=C(SC)C(=O)C=C2)CC=O
642	N1([C@H1]2CCC3=C(C(OC)=C(OC)C(OC)=C3)C4=CC=C(NC)C(C=C24)=O)C=C1I
643	C1=CC(C2=CN(N=N2)[C@@H1]3C4=CC(C(NC)=CC=C4C5=C(OC)C(OC)=C(OC)C=C5CC3)=O)=C1
644	N1([C@H1]2CCC3=C(C(OC)=C(OC)C(OC)=C3)C4=CC=C(NC)C(C=C24)=O)C=C1OCC
645	C12N([C@@H1]3C4=CCC(NC)=CC=C4C5=C(OC)C(OC)=C(OC)C=C5CC3)OC=C1CC=C2O
646	N1([C@H1]2CCC3=C(C(OC)=C(OC)C(OC)=C3)C4=CC=C(NC)C(=O)C=C42)COCC=CC=C1
647	N1([C@H1]2CCC3=C(C(OC)=C(OC)C(OC)=C3)C4=CC=C(NC)C(C=C24)=O)C=C1Cl
648	C=1N([C@H1]2CCC3=C(C(OC)=C(OC)C(OC)=C3)C4=CC=C(NC)C(=O)C=C24)CCNC(=O)OCCN=1
649	N1C(OC)=C(C=C1)N[C@H1]2CCC3=C(C(OC)=C(OC)C(OC)=C3)C4=CC=C(SC)C(C=C42)=O
650	C1[C@@H1](C2=CC(C(SC)=CC=C2C3=C(OC)C(OC)=C(C=C3C1)O)C)ONC(C)=O
651	C1N([C@H1]2CCC3=CC(OC)=C(OC)C(OC)=C3C4=CC=C(NC)C(=O)C=C24)OC(=CC=C1)OSC
652	C1N([C@H1]2CCC3=C(C(OC)=C(OC)C(OC)=C3)C4=CC=C(NC)C(=O)C=C42)CC=C1OC
653	NC(C(O)=O)[C@@H1](O)[C@@H1](O)C
654	N(C(C)C)(C(C)C)C(=O)N1[C@H1]CCC2=C(C(OC)=C(OC)C(OC)=C2)C3=CC=C(NC)C(C=C31)=O
655	N(CCCC)CC1=CN(N=N1)[C@H1]2CCC3=CC(OC)=C(OC)C(OC)=C3C4=CC=C(NC)C(=O)C=C24
656	N(CCCC)CC1=CN(N=N1)[C@H1]2CCC3=C(C(OC)=C(OC)C(OC)=C3)C4=CC=C(NC)C(=O)C=C42
657	C1[C@H1](NCC)CC2=CC(C(NC)=CC=C2C3=C(C(OC)=C(OC)C=C3CC1)OC(C)=O)CC=O
658	C1=C(OC)C(=C(OC)C=C1CC2[C@H1](NC(C(O)=O)C(=O)OCC=CC2=CC=C(NC)CC)OOCN)C
659	C1=C(OC)C(=C(OC=2)CCC([C@H1](CCC=C1)NC(C(C)=O)OC(OCC)=O)C(C(NC)=CC=2)=O)C
660	C12=C(OC)C(=C(OC)C=C1CC[C@H1](NC(C(O)=O)=CNCC2=CC=C(NC)CC)ONCC)ONC
661	C1=C(OC)C(=C(OC)C=C1CC[C@H1](N2C(C(OCC)=O)=C(N=N2)C(OCC)=O)CCC(NC)=CC=C)ONCOC
662	NC(=S)N1[C@@H1]C2=CC(C(NC)=CC=C2C3=C(OC)C(OC)=C(OC)C=C3CC1)=O
663	C[C@H1](CCC1=CC(OC)=C(OC)C(OC)=C1C2=CC=C(C(C=C2)=O)SCN)CC
664	NC(=N)N[C@@H1]1C2=CC(C(NC)=CC=C2C3=C(OC)C(OC)=C(OC)C=C3CC1)=O
665	C[C@H1](CC1C2=CC(OC)=C(OC)C(OC)=C2C3=CC=C(C(=O)C=C31)SCN)CC
666	N=NC(CO)C(O)(OCC)O[C@@H1]1C2=CC(C(NC)=CC=C2C3=C(OC)C(OC)=C(C=C3CC1)NC)=O
667	C[C@H1](CCC1=CC(OC)=C(OC)C(OC)=C1C2=CC=C(C(=O)C=C2)SCN)C(=O)C
668	NC(=S)N[C@@H1]1C2=CC(C(NC)=CC=C2C3=C(OC)C(OC)=C(OC)C=C3CC1)=O
669	C[C@H1](CCC1=CC(OC)=C(OC)C(OC)=C1C2=CC=C(C(=O)C=C2)SCN)CC
670	C12=CC3=C(OC)C(OC)=C(OC)C=C3CC[C@H1](NC=CC=C)C1=CC(=O)C2SC
671	C1=C2C3=C(OC)C(OC)=C(OC)C=C3CC[C@H1](NCC)C2=CC(C(=C1)NC)=O
672	C1[C@@H1](C2=CC(C(NC)=CC=C2C3=C(OC)C(OC)=C(C=C3C1)OC)=O)NCCO
673	C1[C@@H1](C2=CCC(NC)=CC=C2C3=C(OC)C(OC)=C(C=C3C1)OC=O)CCO
674	COC1=C(OC)C=2C3=CC=C(SC)C(C=C3[C@H1](CCC=2C=C1OC)NCC4=CC=CC)=C4O
675	C=C1C2=C(OC)C(OC)=C(OC)C=C2CC[C@H1](NCCCCl)C1=CC(=O)C(NC)=CNC
676	C=C1C2=C(OC)C(OC)=C(OC)C=C2CC[C@H1](NCCCCl)C1=CC(C(=C)NC)=O
677	C=1=C2C3=C(OC)C(OC)=C(OC)C=C3CC[C@H1](NCC)C2=CC(=O)C(SC)=CC=1NC
678	C1[C@@H1](C2=CC(C(NC)=CC=C2C3=C(OC)C(OC)=C(OC)C=C3C1)=O)NCCC
679	C1=2[C@@H1](CCC3=CC(OC)=C(OC)C(OC)=C3C1=CC=C(C(C=2)=O)NCNC)CONC
680	C1C2=CC(OC)=C(OC)C(OC)=C2C3=CC=C(NC)C(=O)C=C3[C@H1](C1)NC4C=CC=CS4
681	CNC(=S)N[C@@H1]1C2=CC(C(NC)=CC=C2C3=C(OC)C(OC)=C(OC)C=C3CC1)=O
682	C[C@@H1](C1=CC(C(NC2)=CC=C1C3=C(OC)C(OC)=C(OC)C=C32)NC)CC
683	CCCCNC(=S)N[C@H1]1CCC2=CC(OC)=C(OC)C(OC)=C2C3=CC=C(NC)C(=O)C=C31
684	CCCCNC(=S)N[C@H1]1CCC2=CC(OC)=C(OC)C(OC)=C2C3=CC=C(NC)C(=O)C=C13
685	N(C=C(O)C=C[C@@H1]1C2)=CC(C(SC)=CC=C2C3=C(OC)C(OC)=C(OC)C=C3CC1)=O
686	N(NNCCC=O)[C@@H1]C1=CC(C(O)=CC=C1C2=C(CC)C=C(OC)C(OC)=C2OC)=O
687	C=1[C@H1](NC(N)=N)CC(C2=C(C(OC)=C(OC)C=C2C)OC)=CC=C(NC)C(C=1)=O
688	N(\C=CC=CC=O)CCC1=CC(OC)=C(OC)C(OC)=C1C2=CC=C(SC)C(C=C2)=O
689	C1C(C2=C(OC)C(OC)=C(OC)C=C2CC[C@@H1]1NC(N)C)C=CC=C(C(C)=O)NC
690	C1[C@H1](NC(N)=S)C2=CCC(NC)=CC=C2C3=C(OC)C(OC)=C(OC)C=C3C1=O
691	C=C(CN[C@H1]1CCC2=CC(OC)=C(OC)C(OC)=C2C3=CC=C(NC)C(C=C13)=O)C=O
692	C1[C@H1](NCCC)C2=CCC(SC)=CC=C2C3=C(OC)C(OC)=C(OC)C=C3CC1=O
693	C1=C(N=NN1[C@H1]2CCC3=CC(OC)=C(OC)C(OC)=C3C4=CC=C(NC)C(=O)C=C24)C
694	C1=C(C(C=C2[C@H1](CCC3=CC(OC)=C(OC)C(OC)=C3C2=C1)NC(C)C)C)OSC
695	C1[C@H1](NC(N)=S)C2=CC(C(NC)=CC=C2C3=C(OC)C(OC)=C(OC)C=C3C1=O)C
696	C1=CC(=CC=N1)CN[C@@H1]2C3=CC(C(NC)=CC=C3C4=C(CC2)C=C(OC)C(OC)=C4OC)=O
697	C=1C=C(NC)C(C=C2C=1C3=C(OC)C(OC)=C(OC)C=C3CC[C@@H1]2NC(C(C)C)=O)SNC
698	CCN(CC)C(=S)N[C@H1]1CCC2=CC(OC)=C(OC)C(OC)=C2C3=CC=C(NC)C(C=C13)=O
699	C=12C=C(NC)C(C=C3C=1C4=C(OC)C(OC)=C(OC)C=C4CC[C@@H1]3NC(NCCCC=O)N)=C2O
700	CCN(CC)C(=S)N[C@H1]1CCC2=CC(OC)=C(OC)C(OC)=C2C3=CC=C(NC)C(=O)C=C31
701	CCN(CC)C(=S)N[C@H1]1CCC2=CC(OC)=C(OC)C(OC)=C2C3=CC=C(NC)C(=O)C=C13
702	C=1C=C(NC)C(C=C2C=1C3=C(OC)C(OC)=C(OC)C=C3CC[C@@H1]2NC(C(C)C)=O)SNC=O
703	C1[C@H1](NC(N(CC=C)CC=C)=S)C2=CC(C(NC)=CC=C2C3=C(OC)C(OC)=C(C=C3C1)OC)NC=O
704	C=CC=C(NC(=O)N[C@H1]1CCC2=CC(OC)=C(OC)C(OC)=C2C3=CC=C(NC)C(=O)C=C13)C
705	C=CC=C(NC([C@@H1]C1=CCC(SC)=CC=C1C2=C(OC)C(OC)=C(OC)C=C2CC)=O)N=O
706	C1=2[C@H1](CCC3=CC(OC)=C(OC)C(OC)=C3C1=CC=C(C(=O)C=2)SCNC(C)=O)C=C
707	C=CC=C(NC(=O)N[C@H1]1CCC2=CC(OC)=C(OC)C(OC)=C2C3=CC=C(NC)C(C=C13)=O)C
708	C=1NCC(=O)C=C2[C@H1](CCC3=C(C(OC)=C(OC)C(OC)=C3)C2=CC=1)NC(C(C)C)=O
709	C=CC=C(NC(=O)N[C@H1]1CCC2=CC(OC)=C(OC)C(OC)=C2C3=CC=C(NC)C(=O)C=C31)C
710	C1=CC=C(NC(=O)N[C@H1]2CCC3=CC(OC)=C(OC)C(OC)=C3C=4C2=CC(C(NC)=CC=4)=O)C1
711	C[C@H1](CCC1=CC(OC)=C(OC)C(OC(OCC)=O)=C1C2=CC=C(SC)C(=O)C=C2)NCC
712	CCN[C@H1]([C@H1])C1OC(C)(C2)O[C@@H1]1[C@H1](CNC(=S)N[C@H1]CCC3=C(C(OC)=C(OC)C(OC)=C3)C4=CC=C(C(=O)C=C24)NC)O
713	CNCC(O)C(OC=C1C=C2C3=C(OC)C(OC)=CC=C3CC[C@H1](NC(C)=O)C2=CC1)=O
714	COCC(CN[C@@H1]1C=2C(C3=C(C(OC)=C(OC)C=C3CC1)OC)=CC=C(NC)C(C=2)=O)F
715	N=NC(CNC(=O)OC)=C=CC=CC=CN[C@@H1]C=CC
716	N=NC(CN1C(=O)OC)=C=C(C=CC=CNCC=CC)C2(NC)C(C(O)=CC2C3=C)(OC)C(OC)=C(OC)C=C3CC1OC
717	N1=NC(COC(=O)C2=CC=NC=C2)=CN1[C@@H1]3C4=CC(C(NC)=CC=C4C5=C(OC)C(OC)=C(OC)C=C5CC3)=O
718	NC1=NN=NN1[C@@H1]2C=3C(C4=C(C(OC)=C(OC)C=C4CC2)OC)=CC=C(NC)C(C=3)=O
719	N=NC(CNC(=O)OC)=C=C(C=CC=CNCC=CC12)C(NC)C(OC)=C(OC)C=C1CC[C@H1](NC(=O)C)C2F
720	N=NC(CNC(=O)OC)=C=C(C=CC=CNCC=CC12)C(NC)C(OC)=C(OC)C=C1CC[C@H1](NC(=O)C)C2=CC
721	N1C=NN=NN1[C@H1]2CCC3=C(C(OC)=C(OC)C(OC)=C3)C4=CC=C(NC)C(=O)C=C24
722	OCCN(CCO)C(=S)N1[C@@H1]C2=CC(C(NC)=CC=C2C3=C(OC)C(OC)=C(OC)C=C3CC1)=O
723	N12C=NN=NN1[C@H1]3CCC4=C(C(OC)=C(OC)C=C4C=5C3=CC(C(NC)=CC=5)=O)OCC=C2
724	N=NC(CNC(=O)OC)=C=C(C=CC=CNCC=CC=1)C2(NC)C(C(O)=CC=1C3=C)(OC)C(OC)=C(OC)C=C3CC2OOC
725	N1CC=CN([C@@H1]2C3=CC(C(NC)=CC=C3C4=C(CC2)C=C(OC)C(OC)=C4OC)=O)C1C
726	N=NC(CNC(=O)OC)=C=C(C=CC=CNCC=CC1)C(NC)C(OC)=C(OC)C=C1CC[C@H1](NC(=O)C)C=CC
727	NC(C(OCC)=C)N[C@H1]1CCC2=CC(OC)=C(OC)C(OC)=C2C3=CC=C(NC)C(=O)C=C31
728	NC(C(OCC)=C)N[C@H1]1CCC2=CC(OC)=C(OC)C(OC)=C2C3=CC=C(NC)C(=O)C=C13
729	N([C@H1]1CCC2=CC(OC)=C(OC)C(OC)=C2C3=CC=C(NC)C(C=C13)=O)=N
730	NC(C(OCC)=C)N[C@H1]1CCC2=CC(OC)=C(OC)C(OC)=C2C3=CC=C(NC)C(C=C13)=O
731	N([C@H1]1CCC2=C(C(OC)=C(OC)C(OC)=C2)C3=CC=C(NC)C(C=C31)=O)CCCC
732	NC(CCC)N[C@@H1]1C2=CC(C(NC)=CC=C2C3=C(OC)C(OC)=C(OC)C=C3CC1)=O
733	N([C@H1]1CCC2=C(C(OC)=C(OC)C(OC)=C2)C3=CC=C(NC)C(C=C31)=O)CCC
734	N[C@H1]1CCC2=CC(OC)=C(OC)C(OC)=C2C3=CC=C(NC)C(C=C31)=O
735	N([C@H1]1CCC2=C(C(OC)=C(OC)C(OC)=C2)C3=CC=C(NC)C(C=C31)=O)CCC#N
736	N([C@H1]1CCC2=CC(OC)=C(OC)C(OC)=C2C3=CC=C(NC)C(C=C31)=O)=C
737	N([C@H1]1CCC2=CC(OC)=C(OC)C(OC)=C2C3=CC=C(NC)C(C=C13)=O)C=CC=C
738	N([C@H1]1CCC2=C(C(OC)=C(OC)C(OC)=C2)C3=CC=C(SC)C(C=C31)=O)CCCC
739	N([C@H1]1CCC2=CC(OC)=C(OC)C(OC)=C2C3=CC=C(NC)C(C=C13)=O)=CC
740	C1=2[C@H1](CCC3=C(C(OC)=C(OC)C(OC)=C3)C1=CC=C(C(C=2)=O)NCNCC(C)C)ONC
741	C1=CC=C(C(Cl)=C1)CN[C@H1]2CCC3=CC(OC)=C(OC)C(OC)=C3C4=CC=C(NC)C(C=C24)=O
742	C1=2[C@H1](CCC3=C(C(OC)=C(OC)C(OC)=C3)C1=CC=C(C(C=2)=O)NCNCC)OCSC
743	C12[C@@H1](CC(C3=C2C(OC)=C(OC)C=C3C1)OC=CC=C(NC)CC)ONC(C)=O
744	N(C)C=1C(=O)C=C2[C@H1](CCC3=C(C(OC)=C(OC)C(OC)=C3)C2=CC=1)N4C(C(=O)O)=C(N=N4)C(=O)N
745	C1[C@H1](NCC)CC2=CC(C(NC)=CC=C2C3=C(C(OC)=C(OC)C=C3CC1)OC(C)=O)(C)ONC=O
746	N(CCCC)CNCC1=CN(N=N1)[C@H1]2CCC3=CC(OC)=C(OC)C(OC)=C3C4=CC=C(NC)C(=O)C=C24
747	C12[C@H1](NCC)CC3=CC2(C(SC)=CC=C3C4=C(C(OC)=C(OC)C=C4CC1)OCNC(C)=O)NC
748	C1=C(O)C(OC)=C(OC)C=CCC[C@H1](NN=NCC(O)=O)OC2=CC(C(NC)=CC=C12)=O
749	C12=C(OC)C(=C(OC)C=C1CC[C@H1](NC(C(=O)OCC)=C(COCC)OCCC(NC)=CC=CON)C=C2N)C
750	N(C)C=1C(=O)C=C2[C@H1](CCC3=C(C(OC)=C(OC)C(OC)=C3)C2=CC=1)NC(C(=O)O)=C(COCC)C=O
751	N(C)C=1C(=O)C=C2[C@H1](CCC3=CC(OC)=C(OC)C(OC)=C3C2=CC=1N4)C(C(=O)O)=C(N=N4)C(O)=O
752	C12=C(OC)C(=C(OC)C=C1CC[C@H1](NC(C(=O)OCC)=C(COCC)OCCC(NC)=CC=CON)C=C2)NC
753	N(C(C)C)(C(C)C)C(N[C@H1]1CCC2=C(C(OC)=C(OC)C(OC)=C2)C3=CC=C(NC)C(C=C13)=O)=O
754	O=C(C=C(C(OC1C2)=O)N(N=N2)[C@@H1]3C=4C(C5=C(C(OC)=C(OC)C=C5CC3)OC)=CC=C(NC)CC=4)OC(Cl)=C1C
755	O=C(C=C(C(OCC1)=O)N(N=N1)[C@@H1]2C=3C(C4=C(C(OC)=C(OC)C=C4CC2)OC)=CC=C(NC)CC=3)OC(Cl)=CC
756	O=C(C=C(C(OCC1)=O)N(N=N1)[C@@H1]2C=3C(C4=C(C(OC)=C(OC)C=C4CC2)OC)=CC=C(NC)CC=3)OC(Cl)=C
757	O=C(C=C(C(OCC1)=O)N(N=N1)[C@@H1]2C=3C(C4=C(C(OC)=C(OC)C=C4CC2)OC)=CC=C(NC)CC=3)OC=CCCC
758	OC(\N[C@H1]1CCC2=CC(OC)=C(OC)C(OC)=C2C3=CC=C(C(C=C31)=O)NCNC(C)C)=O
759	O1CC(C2)=CC(=C13)C4=C(OC)C(OC)=C(OC)C=C4CC[C@H1](NC(NC5=CC=C(C=C5)Cl)=S)C3=CC2=O
760	N1=CC=C(C=C1)C(NCC=2N=NN(C=2)[C@H1]3CCC4=CC(OC)=C(OC)C(OC)=C4C5=CC=C(C(C=C53)=O)N)C=O
761	OC(NCC1=CC(OC)=C(OC)C=C1CC[C@H1](NCN(CC)CC)C2=CCC(NC)=CC=C2)=O
762	NC(=CN/C(=NC(O)C=CCI)C1=CN(NC1)C=CC2=CC(NC)=CC(OC)=C2C=CC(OC3)C(OC)=CC=C3)C=CC=O
763	O=CC(=CC1=CC([C@@H1](NC(C(O)=O)=C(N=C)CCCCC2)CC(OC)=C(OC)C(OC)=C21)NC)O
764	NC(=CN/C(=NC(O)C=CCI)C1=CN(N2C1)C=CC3=CC(NC)=CC(OC)=C3C=CC4(OC)C(OC)=CC=C4)CC[C@@H1]2N=O
765	O=CC(=CC=C1C([C@@H1](N2C(C(O)=O)=C(N=C2)C(=O)C)CCC3=CC(OC)=C(OC)C(OC)=C31)=C)NC=O
766	OCC(C)=C1C([C@H1](CCC2=CC(OC)=C(OC)C(OC)=C12)NC(NC3=CC=C(C=C3)F)=O)PNC=O
767	O=CC(=CC=C1C([C@@H1](N2C(C(=O)O)=C(C(=O)O)N=N2)CCC3=CC(OC)=C(OC)C(OC)=C31)=C)NC=O
768	OC(\N[C@H1]1CCC2=CC(OC)=C(OC)C(OC)=C2C3=CC=C(C(C=C13)=O)NCNC(C)C)=O
769	N1=CC=C(C=C1)C(NCC=2N=NN(C=2)[C@@H1]3C4=CCC(NC)=CC=C4C5=C(OC)C(OC)=C(OC)C=C5CC3)=O
770	N1=CC=C(C=C1)C(NCC=2N=NN(C=2)[C@@H1]3C4=CCC(NC)=CC=C4C5=C(OC)C(OC)=C(C=C5CC3)OC)=O
771	CC(C)(C)OC(=O)/N=C(/N[C@H1]1CCC2=C(C(OC)=C(OC)C(OC)=C2)C3=CC=C(NC)C(C=C13)=O)N=N
772	CC(C)(C)OC(=O)NCCC(NCC1=CN(N=N1)[C@H1]2CCC3=CC(OC)=C(OC)C(OC)=C3C4=CC=C(NC)C(=O)C=C42)=O
773	CC(C)(C)OC(=O)NCCCNCC1=CN(N=N1)[C@H1]2CCC3=CC(OC)=C(OC)C(OC)=C3C4=CC=C(NC)C(=O)C=C42
774	CC(C)(C)OC(=O)/N=C(/N[C@H1]1CCC2=C(C(OC)=C(OC)C(OC)=C2)C3=CC=C(NC)C(C=C31)=O)N=N
775	C(=CNCNC(=O)OCC(Cl)(Cl)Cl)[C@H1]CCC1=C(C(OC)=C(OC)C(OC)=C1)C2=CC=C(NC)C(=O)C=C2
776	CC(C)(C)OC(=O)NCCCNCC1=CN(N=N1)[C@H1]2CCC3=CC(OC)=C(OC)C(OC)=C3C4=CC=C(NC)C(=O)C=C24
777	C1=C(OC)C(OC)=C(OC=2)C=3CC([C@H1](CCC=3)C(C(O)=O)=C(COC(=O)CCC=C1)CCC(=CC=2)NC)=O
778	N[C@H1]1CCC2=CC(OC)=C(OC)C(OC)=C2C3=CC=C(NC)C(=O)C=C31
779	N[C@H1]1CCC2=CC(OC)=C(OC)C(OC)=C2C3=CC=C(NC)C(C=C13)=O
780	O=C(N[C@H1]1CCC2=CC(OC)=C(OC)C(OC)=C2C3=CC=C(NC)C(=O)C=C31)C
781	NC(OC)=O
782	NC(NC)=O

## Sheet: File 11
	AI_generated_SMILES
0	COC1=C2C3=CC=C(NC)C(=O)C=C3[C@H1](CCC2=CC(OC)=C1OC)NC(=O)N
1	COC1=C2C3=CC=C(NC)C(=O)C=C3[C@H1](CCC2=CC(OC)=C1OC)NCC
2	CSCC(=O)C=C1C(C2=C(OC)C(OC)=C(C=C2CC[C@@H1]1NCN)N)OCC
3	CNCCC=C1C(C2=C(OC)C(=C(C=C2CC[C@@H1]1NCN)C)OO)COC
4	COC1=CC2=C(C3=C(OC)C(OC)=CC=C3CC[C@@H1]2NOC)CC=C1OC
5	CNCC(C=C1C(C2=C(OC)C(=CC=C2CC[C@@H1]1NCN)C)=O)COC
6	C12OC=CC=C2C=3C(O)CC1=CC=C(OC)C=CC=3C=C
7	CNCC(C=C1C(C2=C(OC)C=C(OC)C=C2CC[C@@H1]1NC=O)C)OC=O
8	C=C1CC[C@H1](C2=CC(C(SC)=CC=C2C1=CC(=COC)OC)OC)ONC
9	COC1=C2C3=CC=C(NC)C(=O)C=C3[C@H1](CCC2=CC(OC)=C1OC)NCCC
10	COC1=C2C3=CC=C(SC)C(=O)C=C3[C@H1](CCC2=CC(OC)=C1OC)NCCC
11	C=C1C=2C[C@H1](CC(C3=CC(OC)=C(OC)C=C31)C=CC=CSC)C(=O)C=2
12	COC=C1C2=CC=C(NC)C(=O)C=C2[C@H1](CCC1C=COC)NCCCCl
13	COC1=C2C3=CC=C(NC)C(=O)C=C3[C@H1](CCC2=CC(OC)=C1OC)NCCCCl
14	C12OC=CC=C2CC(O)CC1=[N+1]=[N-1]
15	C=1NCC=1C=C2C(C3=C(OC)C(=C(OC)C=C3CC[C@@H1]2N)[N+1]=[N-1])OC=CC
16	COC1=C2C3=CC=C(NC)C(=O)C=C3[C@H1](CCC2=CC(OC)=C1OC)NCCCC
17	COC1=C2C3=CC=C(NC)C(C=C3[C@@H1](N=[N+1]=[N-1])CCC2=CC(=C1OC)OC)=O
18	C=C1CC[C@H1](CC(C1C(O)CC(=O)C=C)(OC)C(OC)=COCN)[N+1]=[N-1]
19	C1=C2CC[C@H1](C3=CCC(SC)=CC=C3C2=C(OC)C(=C1OC)OC=O)N
20	C=C1CC[C@H1](CC(C2=CC(OC)=C(OC)C=C21)C=CC=CSC)C(=O)CN
21	C=C1CC[C@H1](C=2C(C3=CC(OC)=C(OC)C=C31)C=CC=CSC)C(C=2)=O
22	COC1=C2C3=CC=C(NC)C(C=C3[C@@H1](NCCCCCC)CCC2=CC(=C1OC)O)C=O
23	CC(C)CN[C@H1]1CCC2=CC(OC)=C(OC)C(OC)=C2C3=CC=C(SC)C(=O)C=C31
24	CC(C)CN[C@H1]1CCC2=CC(OC)=C(OC)C(OC)=C2C3=CC=C(SC)C(=O)C=C13
25	CC(C)CCN[C@H1]1CCC2=CC(OC)=C(OC)C(OC)=C2C3=CC=C(C(C=C31)=O)SC
26	CC(C)CN[C@H1]1CCC2=CC(OC)=C(OC)C(OC)=C2C3=CC=C(C(C=C31)=O)SC
27	CC(C)CCN[C@@H1]1C2=CC(C(SC)=CC=C2C3=C(OC)C(OC)=C(OC)C=C3CC1)=O
28	CC(C)CCN[C@H1]1CCC2=CC(OC)=C(OC)C(OC)=C2C3=CC=C(SC)C(=O)C=C31
29	COC1=C2C3=CC=C(NC)C(=O)C=C3[C@H1](CCC2=CC(OC)=C1OC)NCCCCC
30	COC=CC1=C(C2=CC=C(NC)CC=C2[C@H1](C)N=[N+1])[N-1]CC(OC)=C1OC
31	COC1=C2C3=CC=C(SC)C(=O)C=C3[C@H1](CCC2=CC(OC)=C1OC)NCCCCCC
32	COC1=C2C3=CC=C(NC)C(=O)C=C3[C@H1](CCC2=CC(OC)=C1OC)NCCCCCC
33	C=C1CC=2[C@H1](CC(C3=CC(OC)=C(OC)C=C31)C=CC=CSC)C(C=2)=O
34	COC1=C2C3=CC=C(NC)C(=O)C=C3[C@H1](CCC2=CC(OC)=C1OC)NCCCCCCSC
35	C=C(CO)CN[C@H1]1CCC2=CC(OC)=C(OC)C(OC)=C2C3=CC=C(SC)C(=O)C=C31
36	CC(C)CN[C@H1]1CCC2=CC(OC)=C(OC)C(OC)=C2C3=CC=C(C(C=C31)=O)SCC
37	CC(C)CCN[C@H1]1CCC2=CC(OC)=C(OC)C(OC)=C2C3=CC=C(SC)C(=O)C=C13
38	CC(C)CCN[C@H1]1CCC2=CC(OC)=C(OC)C(OC)=C2C3=CC=C(C(C=C13)=O)SCC
39	COC1=C2C3=CC=C(NC)C(=O)C=C3[C@H1](CCC2=CC(OC)=C1OC)NCCCCCCC
40	C=1NCC(=O)C=C2C(C3=C(OC)C(OC)=C(C=C3CC[C@@H1]2NCCC#N)C)=CC=1
41	C12=CCC[C@H1]2CC1(C3=CC(OC)=C(OC)C(OC)=C3)CC=C
42	C1=C2CC[C@H1](C3=CCC(SC)=CC=C3C2=C(C(OC)=C1OC)OON)CNCCC
43	C1=C2CC[C@H1](C3=CCC(SC)=CC=C3C2=C(OC)C(=C1OC)OC=O)NCCCC
44	CC(C)CCN[C@H1]C1CC2=CC(OC)=C(OC)C(OC)=C2C3=CC=C(SC)C(C=C31)=O
45	CC(C)CCN[C@H1]1CCC2=CC(OC)=C(OC)C(OC)=C2C3=CC=C(SC)C(C=C13)=O
46	C1=C(CO2)CN1C[C@@H1]C3=CC(C(SC)=CC=C3C4=C(OC)C(OC)=C(OC)C=C4CC2)=O
47	CC(C)CCN[C@H1]1CCC2=CC(OC)=C(OC)C(OC)=C2C3=CC=C(SC)C(C=C31)=O
48	C=C1CC=2[C@H1](CC(C3=CC(OC)=C(OC)C=C31)C=CC=CSC)C(=O)C=2N=[N+1]=[N-1]
49	COC1=C2C3=CC=C(NC)C(=O)C=C3[C@H1](CCC2=CC(OC)=C1OC)NCCCCCCCC
50	COC1=C2C3=CC=C(SC)C(=O)C=C3[C@H1](CCC2=CC(OC)=C1OC)NCCCCCCCC
51	CNCC(C1=C2C(C3=C(OC)C(=C(OC)C=C3CC[C@@H1]2NCCC#N)OC)=CC1)=O
52	COC1=C2C3=CC=C(NC)C(=O)C=C3[C@H1](CCC2=CC(OC)=C1OC)NCCC#N
53	N=1NC=1[C@@H1]2C3=CC(C(NC)=CC=C3C4=C(C=C(OC)C(=C4OC)OC)CC2)=O
54	C1=C2CC[C@H1](C3=CCC(NC)=CC=C3C2=C(OC)C(=C1OC)OC)ONCCC#N
55	COC=C1C2=CC=C(NC)C(C=C2[C@@H1](NCCCCCC)CCC1=CC(=COC)OC)=O
56	COC1=C2CC([C@H1](CCC2=CC(OC)=C1OC)NCCC#N)C(C(=CC)NC)=O
57	C1=C2CC[C@H1](C3=CCC(NC)=CC=C3C2=C(OC)C(=C1OC)OC=O)NCCCCCCCCCCC
58	COC=C1C2=CC=C(NC)C(C=C2[C@@H1](NCCCCCCCCCC)CCC1=CC(=COC)OC)=O
59	COC1=C2C3=CC=C(NC)C(=O)C=C3[C@H1](CCC2=CC(OC)=C1OC)NCCCCCCCCCCCC
60	COC=C1C2=CC=C(NC)C(C=C2[C@@H1](NCCCCCCCCC)CC=CC(=C1OC)OC=O)CC
61	COC1=CC2=CC=C(NC)C(C=C2[C@@H1](N3C=C(N=N3)CN)CCC1=CC(=COC)OC)=O
62	COC1=C2CC([C@H1](CCC2=CC(OC)=C1OC)N3N=NC=C3)CN=CC(C(=CC)NC)=O
63	C1NCC(=O)C=C2C(C3=C(OC)C(OC)=C(OC)C=C3CC[C@@H1]2N4C=C(N=N4)CNN)=CC=C1
64	COC=C1C2=CC=C(NC)C(C=C2[C@@H1](N3C=C(N=N3)CCCC)CCC=CC(=C1OC)O)C=O
65	COC1=C2CC([C@H1](CCC2=CC(OC)=C1OC)NC/C=C/C3=CC=CC)=C3CC(C(SC)=CC)=O
66	COC1=C2C3=CC=C(NC)C(=O)C=C3[C@H1](CCC2=CC(OC)=C1OC)N4C=C(N=N4)CNCC
67	COC1=C2CC([C@H1](CCC2=CC(OC)=C1OC)N3N=NC=C3)CN=CC(=O)C(NC)=CC
68	COC1=C2C3=CC=C(NC)C(=O)C=C3[C@H1](CCC2=CC(OC)=C1OC)NCC4=CC=CC=C4
69	COC1=C2C3=CC=C(SC)C(=O)C=C3[C@H1](CCC2=CC(OC)=C1OC)NCC4=CC=CC=C4
70	COC1=C2C3=CC=C(NC)C(=O)C=C3[C@H1](CCC2=CC(OC)=C1OC)NCC(C)C
71	COC=C1C2=CC=C(NC)C(C=C2[C@@H1](NCC(C)C)CCC1=CC(=COC)OC)=O
72	C1=C2CC[C@H1](C3=CCC(SC)=CC=C3C2=C(OC)C(=C1OC)OC=O)NCCC
73	C1OC=CC=C(CC(O)CC1=CC=C(OC)C(OC)=C)NCC=CSC=C
74	C1=C2CC[C@H1](C3=CCC(SC)=CC=C3C2=C(C(OC)=C1OC)OON)COCC
75	COC1=C(OC)C(OC)=CC=2CC[C@@H1](C3=CC(C(=CC=C3C1=2)SC)=O)NCCC(C)CC
76	C12=CC(C(SC)=CC=C1C=C(CC[C@@H1]2NCCC3=CC=CC=C3)C=C(OC)C(OC)=CO)C=O
77	C1=C2C(C3=C(C(OC)=C(OC)C=C3CC[C@@H1]2NCCC(F)F)F)OC=CC=C(C1=O)NC
78	COC1=C(OC)C(OC)=CC=2CC[C@@H1](C3=CC(C(=CC=C3C1=2)NC)=O)N4C=C(CO)N=N4
79	COC1=C(OC)C(OC)=CC=2CC[C@@H1](C3=CC(C(=CC=C3C1=2)NC)=O)NCCC(F)(F)F
80	C12=CC(C(NC)=CC=C1C3=C(C=C(OC)C(OC)=C3OC)CC[C@@H1]2NCCC(F)F)F
81	C1=C2C([C@H1](CCC3=CC(OC)=C(C(OC)=C23)OC)NCCCCl)C(=O)C(=C1)NC
82	COC1=C(OC)C(OC)=CC=2CC[C@@H1](C3=CC(C(=CC=C3C1=2)NC)=O)NCC=4SC=CC=4
83	C1[C@@H1](C2=CC(C(NC)=CC=C2C3=C(C=C(C(=C3OC)OC)OC)C1)=O)NCC=4SC=CC=4
84	C12=CC(C(NC)=CC=C1C3=C(C=C(OC)C(OC)=C3OC)CC[C@@H1]2NCC=4SC=CC=4OC)=O
85	COC1=C(OC)C(OC)=CC=2CC[C@@H1](C3=CC(C(NC)=CC=C3C=21)=O)N4C=C(CO)N=N4
86	C12=CCC(NC)=CC=C1C3=C(OC)C(=C(C=C3CC4[C@@H1]2NCC4CCCOC)OC)O
87	COC1=C(OC)C(OC)=CC=2CC[C@H1](NCC=3SC=CC=3)C=4C(C=21)=CC=C(C(=O)C=4)NC
88	COC1=C(OC)C(OC)=CC=2CC[C@@H1](C3=CC(C(=CC=C3C1=2)NC)=O)NCC4=CC=NC=C4
89	OC1=CC=CC=C1CN[C@H1]2CCC3=CC(OC)=C(OC)C(OC)=C3C4=CC=C(SC)C(=O)C=C24
90	C1=NCCC1=O
91	O=CC1=CN=NN1[C@H1]2CCC3=CC(OC)=C(OC)C(OC)=C3C4=CC=C(C(C=C24)=O)NCCC
92	OC1=CC=CC=C1CN[C@H1]2CCC3=CC(OC)=C(OC)C(OC)=C3C4=CC=C(SC)C(C=C24)=O
93	C12=NCCC13[C@H1](CNC(CCC=CC=CC3=O)=C(OC)C(OC)=C(OC)C)C2SC=CCNC
94	C1=CN=CC=C1CN[C@H1]2CCC3=CC(OC)=C(OC)C(OC)=C3C4=CC=C(C(C=C42)=O)SCC(=O)C
95	O=CC1=CN=NN1[C@H1]2CCC3=CC(OC)=C(OC)C(OC)=C3C4=CC=C(C(C=C42)=O)NCCC
96	OC1=CC=CC=C1CN[C@H1]2CCC3=CC(OC)=C(OC)C(OC)=C3C4=CC=C(C(C=C42)=O)SC
97	OC1=CC=CC=C1CN[C@H1]2CCC3=CC(OC)=C(OC)C(OC)=C3C4=CC=C(SC)C(=O)C=C42
98	O=CC1=CN=NN1[C@H1]2CCC3=CC(OC)=C(OC)C(OC)=C3C4=CC=C(C(=O)C=C42)NCC
99	C1=CN=CC=C1CN[C@H1]2CCC3=CC(OC)=C(OC)C(OC)=C3C4=CC=C(C(C=C42)=O)SCC
100	C1=NCCC12[C@H1](CC3C=CC(OC)=C(OC)C(OC(=O)C)=CC=C23)C(C)=O
101	C12[C@H1]C=CCC[C@H1](N=C(COCC)CC3=CCC(NC)=CC=C31)C(OC)C(OC)=C2OC=O
102	OC1=CC=C(C=C1)CN[C@H1]2CCC3=CC(OC)=C(OC)C(OC)=C3C4=CC=C(SC)C(=O)C=C24
103	OC1=CC=C(C=C1)CN[C@@H1]2C3=CC(C(SC)=CC=C3C4=C(C(OC)=C(OC)C=C4CC2)OC)=O
104	O=CC1=C2[C@H1](CCC3=CC(OC)=C(OC)C(OC)=C3C2=CC=C(OC(=O)CC)C1=O)CC=O
105	C=C1N=CC(C)N1CN[C@H1]2CCC3=C(C(OC)=C(OC)C(OC)=C3)C4=CC=C(C(C=C24)=O)NC
106	OC1=CC=C(C=C1)CN[C@H1]2CCC3=C(C(OC)=C(OC)C(OC)=C3)C4=CC=C(C(C=C42)=O)SC
107	C1=NCC(F)=CC=C1CN[C@H1]2CCC3=CC(OC)=C(OC)C(OC)=C3C4=CC=C(C(=O)C=C24)SCC
108	O=CC1=C2[C@H1](CCC=C3C(OC)=C(OC)C(OC(C)=O)=C3C1=CC=C(SC)C2=O)CC=O
109	C1=CC2C[C@H1](NC(C)=O)C3=CC(C(SC)=CC=C3C2=C(OC)C(OC)=C1OC(C4=CC=CC=C4)=O)SC=O
110	OC1=CC=C(C=C1)CN[C@@H1]2C3=CC(C(SC)=CC=C3C4=C(OC)C(OC)=C(OC)C=C4CC2)=O
111	OC1=CC=C(C=C1)CN[C@H1]2CCC3=C(C(OC)=C(OC)C(OC)=C3)C4=CC=C(SC)C(C=C24)=O
112	OC1=CC=C(C=C1)CN[C@H1]2CCC3=C(C(OC)=C(OC)C(OC)=C3)C4=CC=C(SC)C(=O)C=C24
113	O=CC1=C[C@H1](CCC2=CC(OC)=C(OC)C(OC(=O)C)=C2C1=CC=C(SC)C=O)CC=O
114	O=CC1=C[C@H1](CCC=C2C(OC)=C(OC)C(OC(C)=O)=C2C1=CC=C(SC)C=O)CC=O
115	CNCC(C)OC(=O)N[C@H1]1CCC2=C(C(OC)=C(OC)C(OC)=C2)C3=CC=C(C(=O)C=C31)NCF
116	OC1=CC=C(C=C1)CN[C@H1]2CCC3=CC(OC)=C(OC)C(OC)=C3C4=CC=C(C(C=C42)=O)SCC
117	OC1=CC=C(C=C1)CN[C@H1]2CCC3=C(C(OC)=C(OC)C(OC)=C3)C4=CC=C(SC)C(=O)C=C42
118	COC1=CC=C(C(OC)=C1OC)C2=CC=C(SC)C(C=C2[C@@H1]NC(N(COC)C)=C)=CNC=O
119	C1OC2=CC=C(C(OC)=C2OC)C3=CC=C(SC)C1(C=C3[C@@H1](NC(N(COC)C)O)C=C)ONC
120	COC1=C2C=C(C(OC)=C1OC)C3=CC=C(SC)C(C=C3[C@@H1](NCN=CC=C(F)C=COC)C2)NC=O
121	COC1=CC=C(C(OC)=C1OC)C2=CC=C(SC)C(C=C2[C@@H1](NCNCCCC=O)SCC)=O
122	C1OC2=CC=C(C(OC)=C2OC)C3=CC=C(SC)C(C=C3[C@@H1]1CCC(=O)C(OC)=C)(O)CSCSC
123	C1=CCC[C@H1]1N2C(C(OCC)=O)=C(N=N2)C=O
124	C=C1CC[C@H1](N2C(C(OCC)=O)=C(N=N2)C=CC(=O)C3NC)CC=CC=C3C=C1CNCOCOC
125	OC=CC=CCCN[C@H1]1CCC2=CC(OC)=C(OC)C(=C2C3=CC=C(SC)C(=O)C=C13)OCC
126	COC1=CC=C(C(OC)=C1OC)C2=CC=C(SC)C(C=C2[C@@H1]NC(N(COC)C)=C)ONC=O
127	C=C1CC2[C@H1](NC(C(=O)OCC)=C2)C3=CC(C(NC)=CC=C3C4=C(C(OC)=C(C=C41)OC)OC)=O
128	C1=CC=2C[C@H1](NCN(C(C)C)C(C)C)OC3=CC(C(NC)=CC=C3C=2C=C(C(=C1)OC)OC)NC=O
129	COC1=C2C=C(C(OC)=C1OC)C3=CC=C(NC)C(C=C3[C@@H1](NC(N(COC)C)O)CC2)NC=O
130	OC1=CC=CC=C1CN[C@H1]2CCC3=C(C(OC)=C(OC)C(=C3)OC)C4=CC=C(SC)C(C=C42)=O
131	C1OC2=CC=C(C(OC)=C2OC)C3=CC=C(SC)C(C=C3[C@@H1]1CCC(=O)C(OC)=C)C=O
132	COC1=CC2=C(C(OC)=C1OC)C3=CC=C(SC)C2(C=C3[C@@H1]NC(N(COC)C)=C)ONC
133	CC12[C@H1](CCC3=CC(OC)=C(OC)C(OC)=C3C1=CC=CC(=O)C2)SCNC(C)=O
134	C=CC=C(CCN[C@H1]1CCC2=CC(OC)=C(OC)C(OC)=C2C3=CC=C(SC)C(C=C31)=O)OC
135	CCOC(OC1=C2CC([C@H1](CCC2=CC(OC)=C1OC)NC(C)=O)=CC(C(SC)=CC)=O)SC=O
136	CC1=CC=C(C=C1)CN[C@H1]2CCC3=CC(OC)=C(OC)C(OC)=C3C4=CC=C(SC)C(=O)C=C24
137	CC12[C@H1](CCC3=CC(OC)=C(OC)C(OC)=C3C1=CC=CC(C2)=O)SCNC(C)=O
138	CC1=CC=C(C=C1)CN[C@H1]2CCC3=CC(OC)=C(OC)C(OC)=C3C4=CC=C(SC)C(C=C24)=O
139	C1C=CC=C(SCC1)C=CN(N2C3OC)[C@@H1]2NC(=O)CNC(=O)OCCCC4C=CC(=C)C=C4C=CC=C(NC)CCC3
140	CC1=C2C=C(SC)C(C=C1[C@@H1](NC(C)=O)CCC=CC(OC)=C(OC)COC=CC=C2SC)=O
141	CC1=CC=C(S=2C)C(C=C1[C@@H1](NC(=O)C)CCC=CC(OC)=C(OC)C(OC=CC=O)C=2)SC=O
142	CC1=C2C=C(SC)C(C=C1[C@@H1](NC(=O)C)CCC=CC(OC)=C(OC)C(OC=CCOC)=C2)=O
143	C1COC1(OC2=CC=C3C4=C(OC)C(OC)=C(OC)C=C4CC[C@@H1](C3=CC2=O)SC(C)=O)SC
144	C1C2=CC=C(SC)C(C=C2[C@@H1](NC(C)=O)CCC=CC(OC)=C(OC)C(OC(=O)C=C)C1)SC=O
145	CC1=CC=C(SC)C(C=C1[C@@H1](NC(=O)C)CCC=CC(OC)=C(OC)C(OC=CCOC)=C)=O
146	CC1=CC=C(S=2C)C(C=C1[C@@H1](NC(C)=O)CCC=CC(OC)=C(OC)C(OC=CC=O)C=2)SC=O
147	C1C=CC=C(SC2C1)C3=C(C(OC)=C(OC)C=C3CC[C@@H1]2NC(C)=O)OC=CC=C(SC)C=O
148	CC1=C2C=C(SC)CC=C1[C@@H1](NC(=O)C)CCC=CC(OC)=C(OC)C(OC=CC2)=O
149	C=C1C(C2=C(C(OC)=C(OC)C=C2CC[C@@H1]1NC(C)=O)OC)(C3=CC=CC=C3)OCC=C(SC)C=O
150	C1=C2C(C(OC(CC)=O)=CC=C1C3=C(OC)C(OC)=C(OC)C=C3CC[C@@H1]NSC=CC2)=O
151	OC(NC(=O)OC)C=CC=C1C([C@H1](CCC2=CC(OC)=C(OC)C(OC)=C21)N=C)C=O
152	C1[C@H1](CCC2=CC(OC)=C(OC)C(OC)=C2C1=CC=C(OC(OC)=O)C=O)CSCNC(=O)C
153	O1C(OC(=O)OC)=CC2=CC([C@@H1](NC(C)=O)CCC3=CC(OC)=C(OC)C(OC)=C32)=CC1NC
154	C=1=CC(C(C=C2[C@H1](CCC3=C(C(OC)=C(OC)C(OC)=C3)C2=1)NC(C)=O)=C)=O
155	OC(NCCOCOC1)[C@@H1]C2=CC(C(NC)=CC=C2C3=C(OC)C(OC)=C(OC)C=C3CC1)=O
156	C1[C@@H1](C2=CC(C(OC)=CC=C2C3=C1C=C(OC)COC)=C3OC=O)CC=O
157	C=CC(C(OC(CC)=O)=CC=CC1=C(OC)C(OC)=C(OC)C=C1CC[C@@H1]NSC(=O)CC)=O
158	O=C(OC1=C2C(CC[C@H1](NC(=O)C)C3=CC(C(SC)=CC=C32)=O)=CC(OC)=C1OC)SCC
159	CN(C(=S)N[C@@H1]1C2=CCC(NC)=CC=C2C3=C(C(OC)=C(OC)C=C3CC1)OC)OC
160	C1=C2C3(C(OC(C)=O)=CC=C1C4=C(OC)C(OC)=C(OC)C=C4CC[C@@H1]3NSC=C)C2=O
161	O1C(OC(=O)OC2)=CC=CC([C@@H1](NC(C)=O)CCC3=CC(OC)=C(OC)C(OC)=C32)=CC1NC
162	N1([C@H1]2CCC=C(C(OC)=C(OC)C(OC)=C2C3=CC=C(SC)CC=C3)OC=C1)F
163	N([C@H1]1CCC=C(C(OC)=C(OC)C(OC)=C1C2=CC=C(SC)CC=C2)OC3=CC)=NC=C3
164	O=C(OC1=C2CC([C@H1](CCC2=CC(OC)=C1OC)NC(C)=O)=CC(C(SC)=CC)=O)C
165	OC(N1CCOC12)[C@@H1]C3=CC(C(NC)=CC=C3C4=C(OC)C(OC)=C(OC)C=C4CC2)=O
166	C1N(C(=O)N[C@H1]2CCC3=CC(OC)=C(OC)C(OC)=C3C4=CC=C(NC)CC=C24)OC=C1
167	NC(=CN(NCC)CCCCN1[C@@H1]C=C2CC(C)=CC=C2C3=C(CC1)C=C(OC)C(OC)=C3OC)OF
168	OC=C(OC)C=C1C(C2=CC=C(SC)C(C=C2[C@H1](CC1)NC(C)=O)OCC)=O
169	C[C@H1](CCC1=CC(OC)=C(OC)C(OC)=C1C2=CC=C(C(C=C2)=O)SCNCC)O
170	OC1=C(C=CC=C1)CN[C@H1]2CCC3=CC(OC)=C(OC)C(OC)=C3C4=CC=C(SC)C(C=C24)=O
171	O1C=C(C=C1OC)C=O
172	O=C1C=CC=C2C([C@H1](CCC3=CC(OC)=C(OC)C(OC)=C32)NC(C)=O)=C1SC
173	C1=CC=C(C=C1)CN[C@H1]2CCC3=CC(OC)=C(OC)C(OC)=C3C4=CC=C(C(C=C42)=O)SCC
174	O=CC(=CC=C1C([C@H1](CCC2=CC(OC)=C(OC)C(OC)=C21)NC(C)=O)SC)O
175	OC1=C(C=CC=C1)CN[C@H1]2CCC3=CC(OC)=C(OC)C(OC)=C3C4=CC=C(SC)C(=O)C=C42
176	C1[C@H1](CCC2=CC(OC)=C(OC)C(OC(CC)=O)=C2C1=CC=C(SC)C(=O)CNC)SC
177	C1=CC=C(S1C)C2=CN(NC2)[C@H1]C3C4C5=CC(OC)=C(OC)C(OC)=C5C=CC=C(NC)C(=O)C=C34
178	N=1C(=CN(N=1)[C@@H1]2C3=CCC(NC)=CC=C3C4=C(OC)C(OC)=C(OC)C=C4CC2)F
179	C1=CC2=C(S1C)C(=O)C3=C[C@H1](CCC4=C(C(OC)=C(OC)C(OC)=C4)C23)NCSC
180	CC=CCCCN[C@H1]1CCC2=CC(OC)=C(OC)C(OC)=C2C3=CC=C(SC)C(C=C13)=O
181	C1=CC=C(S1C)C2=CN(NC2)[C@H1]3CCC4=CC(OC)=C(OC)C(OC)=C4C5=CC=C(NC)C(=O)C=C35
182	OC1=C(C=CC=C1)CN2[C@H1]CCC3=CC(OC)=C(OC)C(OC)=C3C4=CC=C(SC)C(C=C24)=O
183	OC=C(OC)C=CC(CC([C@@H1](NC(C)=O)C=CCC(SC)=CC)=O)ONC
184	OC=C(OC)C=C1C(C2=CC=C(SC)C(C=C2[C@@H1](NC(C)=O)CC1)=O)(C)OSC
185	C=C1CC(=C2C=C(SC)CC=C[C@H1]CCC2=CC(OC)=C1O)C(OCC)=O
186	OC1=C(C=CC=C1)CN[C@@H1]2C3=CC(C(SC)=CC=C3C4=C(CC2)C=C(OC)C(OC)=C4OC)=O
187	OC1=C(C=CC=C1)CN[C@@H1]2C3=CC(C(SC)=CC=C3C4=C(CC2)C=C(OC)C(OC)=C4OC)SC=O
188	C1=2[C@H1]CCC3=CC(OC)=C(OC)C(OC)=C3C1=CC=C(C(C=2)=O)SCNC(C)=O
189	C1=CC=2C1=CC(C(SC)=CC=2)=O
190	OC1=C(C=CC=C1)CN[C@H1]2CCC3=CC(OC)=C(OC)C(OC)=C3C4=CC=C(SC)C(C=C42)=O
191	C1=CC=2C(=CCC(OC(C3=CC=CC4=C3)=O)=CC=2O[C@H1]CCC1)NC=C(OC)C4OC
192	C=CCC(=CC=C(SC)CC=C[C@H1]CC)NC(C)=O
193	COC1=C2C3=CC=C(SC)C(=O)C=C3[C@H1](CCC2=CC(OC)=C1OC)NCCC4=CC=CC=C4
194	C1=C2CC[C@H1](C3=CCC(NC)=CC=C3C2=C(C(OC)=C1OC)OC=O)NCCCCC
195	COC1=C2C3=CC=C(NC)C(C=C3[C@@H1](NCCCCCCCC)CCC1=CC=C2OC)OC=O
196	COC1=C2C3=CC=C(NC)C(=O)C=C3[C@H1](CCC2=CC(OC)=C1OC)NCCC4=CC=CC=C4
197	C=1NCC(=O)C=C2C=1C3=C(OC)C(OC)=C(C=C3CC[C@@H1]2NCCCCCO)C=CC
198	C=C1CC2[C@H1](CCC3=C(C(OC)=C(OC)C(=C3)OC)C2=CC=C1)SC=O
199	C1OC2=C3C4=CC=C(NC)C(=O)C=C4[C@H1](CCC3=CC(OC)=C2OC)NCCCCC=C1
200	COC1=C2C3=CC=C(NC)C(=O)C=C3[C@H1](CCC2=CC(OC)=C1OC)N4C=C(N=N4)CO
201	COC1=C2C3=CC=C(NC)C(=O)C=C3[C@H1](CCC2=CC(OC)=C1OC)N4N=NC(=C4)CO
202	COC=C1C2=C3C=C(NC)C(C=C2[C@@H1](NCCCCCCCCCC)CCC1=CC(=C3OC)O)OC
203	COC1=C2C3=CC=C(SC)C(=O)C=C3[C@H1](CCC2=CC(OC)=C1OC)NC/C=C/C4=CC=CC=C4
204	COC1=C2C3=CC=C(NC)C(=O)C=C3[C@H1](CCC2=CC(OC)=C1OC)NC/C=C/C4=CC=CC=C4
205	COC1=C2C3=CC=C(NC)C(=O)C=C3[C@H1](CCC2=CC(OC)=C1OC)NCCCCCCCCSC
206	COC1=C2C3=CC=C(NC)C(C=C3[C@@H1](NCCCCCCCC)CCC1=CC(=C2OC)OCS)C=O
207	C1=C2CC[C@H1](C3=CCC(SC)=CC=C3C2=C(C(OC)=C1OC)OC=O)NCCCCCC
208	COC=CC1=C2C=C(NC)C(C=C1[C@@H1](NCCCCCCCCCC)CCC=CC(=C2OC)O)C=O
209	C1=C2CC[C@H1](C3=CCC(NC)=CC=C3C2=C(OC)C(=C1OC)OC)ONCCCCCC
210	COC=C1C2=CC=C(NC)C(C=C2[C@@H1](NCCCCCC)CCC1=CC(=COC)OC)SC=O
211	C1=C2CC[C@H1](C3=CCC(SC)=CC=C3C2=C(OC)C(=C1OC)OC=O)NCCCCCC
212	C1=C2CC[C@H1](C3=CCC(NC)=CC=C3C2=C(OC)C(=C1OC)OC)ONCCCCCCC
213	CNC=CC=C1C([C@H1](CCC2=CC(=C(OC)C(OC)=C12)OC)NCC)=O
214	COC1=CC=2CC[C@H1](NC(C)=O)C3=CC(=O)C(SC)=CC=C3C=2C(=C1OC)OC
215	CSC=1C(C=C2C(=CC=1)C3=C(OC)C=CC=C3CC[C@@H1]2NCN)COCOC
216	C=1SC=2C=1C=C3C(=CC=2)C4=C(OC)C(=CC=C4CC[C@@H1]3NCN)C
217	CSC=1C(C=C2C(=CC=1)C3=C(OC)C(=C(OC)C=C3CC[C@@H1]2NCC)O)OC=O
218	COC1=CC=2CC[C@@H1](C=3C(C=2C(=C1OC)OC)=CC=C(NC)C(=O)C=3)NC(=O)CNC
219	CSC1=CC=C2C(=CC1=O)[C@H1](CCC3=CC(OC)=C(OC)C(=C32)OC)NC(=O)C
220	CSC1=CC=C2C(=CC1=O)[C@H1](CCC3=CC(OC)=C(OC)C(=C23)O)CNC(=O)C
221	COC=CCC=1C[C@@H1](C=C2CC(OC(C(C)C)=O)=CC=C2C=1C=COC)OC=O
222	CNC1=CC=C2C(=CC1=O)[C@H1](CCC3=CC(OC)=C(OC)C(=C23)OC)NC(=O)C
223	COC1=CC=2CC[C@@H1](C3=CC(=O)C(NC)=CC=C3C=2C(OC)=C1OCN)C(=O)C
224	CSC=1C(C=C2C(=CC=1)C3=C(OC)C(=C(OC)C=C3CC[C@@H1]2NCN)O)OCNC
225	CNC=CC=C1C[C@H1](CCC2=CC(=C(OC)C(OC)=C12)OC)N=CC(=O)OCOO
226	CSC1=CC=C2C3=C(C=C(OC)C(OC)=C3OC)CC[C@@H1](C2=CC1=O)NC(C)=O
227	COC1=CC=2CC[C@H1](NC(C)=O)C3=CC(=O)C(SC)=CC=C3C=2C(OC)=C1OC
228	C1=C2[C@H1](CCC3=C(C(OC)=C(C(=C3)OC)OC)C2=CC=C(C1=O)NC)NC
229	COC=CC=1CC[C@H1](NC(C)=O)C2=CC(=O)C(SC)=CC=C2C=1C(O)=COC
230	C1SCC(C=C2C(C3=C(C=C(OC)C(OC)=C3OC)CC[C@@H1]2N)=C1)=O
231	CSC=1C(C=C2C(=CC=1)C3=C(OC)C(OC)=C(C=C3CC[C@@H1]2NCC)OO)C=O
232	CNC=1C(C=C2C(=CC=1)C3=C(OC)C(OC)=C(C=C3CC[C@@H1]2NC(C)=O)O)C=O
233	CSC1=CC=C2C(=CC1=O)[C@H1](CCC3=CC(OC)=C(OC)C(OC)=C23)NCC
234	COC=C1C=2CC[C@H1](NC(C)=O)C3=CC(=O)C(SC)=CC=C3C=2C(O)=C1OC
235	COC1=CC=2CC[C@@H1](C3=CC(C(NC)=CC=C3C=2C(=C1OC)OC)=O)NC(=O)C
236	CSC=1C(C=C2C(=CC=1)C3=C(OC)C(OC)=C(C=C3CC[C@@H1]2NC(C)=O)OC)=O
237	COC=C1CCC2[C@H1](O)CCC3=CC(=C(OC)C(OC)=C3C2=CC1OCN)C(=O)C
238	COC=C1CCC2[C@H1](O)CCC3=CC(=C(OC)C(OC)=C3C2=CC1OCNC)C=O
239	COC=C1CCC[C@H1](O)CCC2=CC(=C(OC)C(OC)=C2C=CC1OC)NC(=O)C
240	CNC=1C(C=C2C(=CC=1)C3=C(OC)C(OC)=CC=C3CC[C@@H1]2NC(C)=O)OC=O
241	C=1OC=CC2CC[C@H1](N)CCC3=CC(=C(OC)C=C3C2=CC=1OCS)C
242	C1OC=CC=2CC[C@H1](NC(N)=O)C3=CC(C(=CC=C3C=2C(OC)=C1OC)NC)=O
243	COC=C1CCC[C@H1](NC(N)=O)C2=CCC(=CC=C2C1C(O)C=O)NC
244	CSC=1C(C2=CC(=CC=1)C3=C(OC)C(OC)=CC=C3CC[C@@H1]2NOC)NC=O
245	C1OC2=CCCC[C@H1](N)C3=CC(=O)C(SC)=CC=C3C2C(OC)=C1OC
246	CSC=1CC=CC(=C2C=1)C3=C(OC)C(OC)=C(C=C3CC[C@@H1]2NOCNC)O
247	COC=CCC=1C[C@H1](N)C2=CC(C(=CC=C2C=1C(OC)=CO)CS)C=O
248	C1N2CC1(C=C3C(=O)C(NC)=CC=C3C=C(OC)C(OC)=C(OC)C=C)CC[C@@H1]2N=O
249	NN(C[C@H1](OC[C@@H1][C@@H1](CO)O)OS1C2=CCC(NC)=CC=C2C3=C(C=C(C(=C3OC)OC)OC)CC1)O
250	C=12OC3=CCCC[C@H1](N)CC(C=1C(=C2OC)OC)=CC=C(O)CC3=O
251	CNC=1C(C=CC(=C2C=1)C3=C(OC)C(OC)=CC=C3CC[C@@H1]2NOCS)C=O
252	CSCCC=C1C(C2=CC=C(OC)C(OC)=C2OC)CC[C@@H1]1N=O
253	CNC=1CC=CC(=C2C=1)C3=C(OC)C(OC)=C(C=C3CC[C@@H1]2NOCS)C=O
254	COC=C1C2CC[C@H1](N)CCC3=CC(=C(OC)C=C3C2=CC1OCS)C
255	COC=C1CC=2C[C@H1](N)C3=CC(C(=CC=C3C=2C(OC)=C1O)CN)C=O
256	CC(=O)N[C@@H1]1C=2C(C3=C(OC)C(OC)=C(OC)C=C3CC1)=CC=C(C(=O)C=2)SC
257	CC(=O)N[C@H1]1CCC2=CC(OC)=C(OC)C(OC)=C2C=3C1=CC(=O)C(SC)=CC=3N
258	CC(=O)C(S1=2C3)CC(OC)=C(OC)C(C)=C1C3=CC=C(SC)C(C=2)=O
259	CC(=O)C=C1C(C2=C(OC)C(OC)=C(OC)C=C2CC[C@@H1]1NCC)=O
260	C1C(=O)C=CC2=C(SC)C(OC)=C(OC)C(C)=CCC[C@@H1](C2=C1)NC(=O)C
261	C12=C(CC1NC(=O)C=CC(C(SC)=CC2)=O)C(OC)=C(C(OC)=C)OC
262	CC(=O)C(S1C2)CC(OC)=C(OC)C(O)=C2C=3C1=CC(C(SC)=CC=3)=O
263	CC(=O)N[C@H1]1CCC2=CC(OC)=C(OC)C(OC)=C2C=3C1=CC(=O)C(SC)=CC=3
264	CC(=O)C(=CN)C(C)C=O
265	C1=C(CC([C@H1])(C2C1)N=C(Cl)C=C2CCOC)C(OC)C(=C)OCSC
266	CC(=O)N[C@@H1]1CCC2=CC(OC)=C(OC)C(OC)=C2C=3C1=CC(=O)C(SC)=CC=3
267	C1=C(C(OC(=O)C)=C2C(OC)=C1)OCC=3C([C@H1](CC2)NC(=O)C)=CC(=O)C(O)=CC=3
268	CC(=O)OC1=CC=C2C3=C(C(OC)=C(C=C3CC[C@@H1](C2=CC1=O)NC(=O)CO)CO)C
269	CC(=O)N[C@@H1]1C=2C(C3=C(C(=C(OC)C=C3CC1)OC)OC)=CC=C(SC)C(C=2)=O
270	C12C(=O)C(=C3C=C1C4=C(CC[C@@H1]3NC(C)=O)C=C(OC)C(=C4OC)OC=C2SC)OC(=O)C
271	C12C(=O)C2=C3C=C1C4=C(CC[C@@H1]3NC(C)=O)C=C(OC)C(OC)=C4OC(OC)=O
272	CC(=O)OC1=CC=C2C3=C(C(OC)=C(C=C3CC[C@@H1](C2=CC1=O)OC(=O)C)OC)NC(=O)COC
273	CC(=O)OC=1C(C=C2C(=CC=1)C3=C(OC)C(=C(OC)C=C3CC[C@@H1]2NC(=O)C)OC)=O
274	CC(=O)OC1=CC=C2C(=CC1=O)[C@H1](CCC3=CC(OC)=C(OC)C(OC)=C23)NC(C)=O
275	C12C(=O)C(=CC=C1C3=C(CC[C@@H1]2NC(C)=O)C=C(OC)C(=C3OC)OC(OC)=O)SC
276	CC(=O)N[C@@H1]1C2=CC(=O)C(SC)=CC=C2C3=C(C(OC)=C(C=C3CC1)OC)OC(=O)CC
277	CC(=O)OC=1C(=O)C=C2C(=CC=1)C3=C(OC)C(OC)=C(C=C3CC[C@@H1]2NC(C)=O)C(=O)C
278	C12C(=O)C=C3C=C1C4=C(CC[C@@H1]3NC(C)=O)C=C(OC)C(=C4OC(OC)=O)OC=C2
279	C12C(=O)C(=CC=C1C3=C(CC[C@@H1]2NC(C)=O)C=C(OC)C(OC)=C3OC(OC)=O)SC
280	C1C(=O)C(=C2C=C1C3=C(CC[C@@H1]2NC(C)=O)C=C(OC)C(OC)=C3OC(OC)=O)C
281	CC(=O)OC1=CC=C2C3=C(C(OC)=C(C=C3CC[C@@H1](C2=CC1=O)NC(=O)C)OC)OC(=O)C
282	C1C(=O)C(=C2C=C1C3=C(CC[C@@H1]2NC(C)=O)C=C(OC)C(OC)=C3OC(OC)=O)SC
283	C=1C(=O)C(OC(=O)CC)=CC=CC2=C(C3=C(OC)C(OC)=C2OC)CC[C@H1](NC(=O)C)C3=1
284	C1C(=O)OC2C=CC=CC(=C2)[C@@H1](NC(=O)C)CCC3=CC(OC)=C(OC)C(=C3)OC=C1
285	C=12C=3C(=CC(=O)C(SC)=CC=3)[C@H1]CCC=1C=C(OC)C(=C2OC)OCNC(C)=O
286	CCC(=O)OC1=CC=C2C3=C(C(OC)=C(C=C3CC[C@@H1](C2=CC1=O)OC(=O)C)OC)OC
287	CCC(=O)OC1=C2C(=CC(OC)=C1OC)CC[C@H1](NC(=O)C)C3=CC(=O)C(SC)=CC=C23
288	CCC(=O)OC1=CC=C2C(=CC1=O)[C@H1](CCC3=CC(OC)=C(OC)C(OC)=C23)NC(=O)C
289	CCC(=O)OC1=CC(=CC(OC)=C1OC)CC[C@H1](NC(C)=O)C2=CC(=O)C(=CC=C2)OC
290	CCC(=O)OC1=CC=C2C(=CC1=O)[C@H1](CCC3=CC(OC)=C(OC)C(OC)=C23)NC(C)=O
291	CCC(=O)N[C@H1]1CCC2=CC(=C(OC)C(OC)=C2C=3C1=CC(=O)C(=CC=3)OC(OC)=O)OC
292	CCC(=O)OC1=CC=C2C3=C(C=C(OC)C(OC)=C3OC)CC[C@@H1](C2=CC1=O)NC(C)=O
293	CCC(=O)OCC(C=C1C(=C)C2=C(OC)C(=C(C=C2CC[C@@H1]1N)CC)OO)COC=CO
294	CCC(=O)OC1=CC(=CC(OC)=C1OC)CC[C@H1](NC(=O)C)C2=CC(=O)C(SC)=CC=C2
295	CC(C)C(OC1=CC=C2C3=C(C=C(OC)C(=C3OC)OC)CC[C@H1](NC(=O)C)C2=CC1=O)=O
296	CC(C)C(=O)OC1=CC=C2C3=C(C=C(OC)C(OC)=C3OC)CC[C@@H1](C2=CC1=O)NC(C)=O
297	CC(C)C(OC1=CC=C2C3=C(CC[C@@H1](C2=CC1=O)NC(C)=O)C=C(OC)C(OC)=C3OC)(O)C
298	CC(C)C(=O)OC1=C2C(=CC(OC)=C1OC)CC[C@H1](NC(=O)C)C3=CC(=O)C(SC)=CC=C23
299	CC(C)C1(OC=C2C3=CC=C(C(C=C3[C@H1](CCC2=CC(=C1OC)OC)NCC)=O)O)OC=O
300	CC(C)C(OC1=CC=C2C3=C(CC[C@@H1](C2=CC1=O)NC(C)=O)C=C(OC)C(OC)=C3OC)=O
301	CC(C)C(OC1=CC=C2C3=C(CC[C@@H1](C2=CC1=O)NC(C)=O)C=C(OC)C(OC)=C3OC)(O)C=O
302	CC(C)C1(OC=CC2=CC=C(C(C=C2[C@H1](CCC=CC(=C1OC)OC)NCC)=O)O)OC=O
303	CC(C)C(OC1=CC=C2C3=C(CC[C@@H1](C2=CC1=O)NC(C)=O)C=C(OC)C(OC)=C3OC=O)C
304	CC(C)C(=O)OC1=CC=C2C([C@@H1](NC(=O)C)CCC3=C2C(=C(OC)C(OC)=C3)OC)=CC1=O
305	CC(C)C(=O)OC1=CC=C2C3=C(C(OC)=C(C=C3CC[C@@H1](C2=CC1=O)NC(C)=O)OC)OC(=O)C
306	CC(C)C(OC1=CC=C2C3=C(C=C(OC)C(OC)=C3OC)CC[C@@H1](C2=CC1=O)NC(=O)CC)(O)C
307	CC(C)C(=O)OC1=C2C(=CC(OC)=C1OC)CC[C@H1](NC(=O)C)C=3C2=CC=C(C(=O)C=3)SC
308	CC(=O)N[C@@H1]1C2=CC(C(SC)=CC=C2C3=C(C(OC)=C(OC)C=C3CC1)OC(=O)C4=CC=CC=C4)=O
309	CC(=O)N[C@H1]CCC1=CC(OC)=C(OC)C(=C1C2=CC=C(SC)C(=O)C=C2)CC=C
310	CC(=O)N[C@@H1]1C2=CC(C(SC)=CC=C2C3=C(C(OC)=C(OC)C=C3CC1)OC(=O)C4=CC=CC)=C4O
311	CC(=O)N[C@@H1]1C2=CC(C(SC)=CC=C2C3=C(OC)C(=C(OC)C=C3CC1)OC(=O)C=CC=CC=C)O
312	C12=C(C(=C(OC)C(OC)=C1)OC(C)=O)CC([C@H1](CC2)NC(C)=O)=CC(C(SC)=CC)=O
313	CC(=O)N[C@@H1]1C2=CC(C(SC)=CC=C2C3=C(OC)C(=C(OC)C=C3CC1)OC(=O)C4=CC=CC=C4)=O
314	CC(=O)OCC1=CN(N=N1)[C@H1]2CCC3=CC(OC)=C(OC)C(OC)=C3C=4C2=CC(=O)C(=CC=4)NCC
315	C1=C(C2=C(OC)C(OC)=C1OC(=O)CCC)C[C@@H1](C3=CC(=O)C(SC)=CC=C32)NC(C)=O
316	CC(=O)N[C@H1]1CCC2=CC(OC)=C(OC)C(=C2C3=CC=C(C(C=C31)=O)OCC4=CC=CC=C4)OOC
317	C=C(C(OC)=C(OC)CC=CC=C(OC(C(C)C)=O)C(OC)=CC=CCC[C@H1](NC(=O)C)C)OOC
318	C1=C(C=C(OC)C(OC)=C1OC(=O)OCC)CC[C@@H1](C2=CC(=O)C(SC)=CC=C2)NC(C)=O
319	O=C(OC)OC=C(OC)C(=C1C(CC[C@@H1](C2=CC(C(=CC=C12)SC)=O)N=C)O)C
320	O=C(OC1)OC=C2C3=CC=C(C(C=C3[C@H1](CCC2=CC(=C1OC)OC)NCC)=O)OOC
321	O=C(OC)OCC(=O)C=C1C(C2=C(C(OC)=C(C=C2CC[C@@H1]1NC(=O)C)OC)OC)(O)CC
322	O=C(OC)OC1=C2C3=CC=C(C(C=C3[C@H1](CCC2=CC(OC)=C1O)CNC=O)C)OOC(=O)C
323	O=C(OC)OC1=CC=C2C3=C(C(OC)=C(C=C3CC[C@@H1](C2=CC1=O)NC(C)=O)OC)OC
324	O=C(OC)OC1=CC=C2C3=C(C(OC)=C(C=C3CC[C@@H1](C2=CC1=O)NC(=O)C)OC)OC
325	O=C(OC)OC1=CC=C2C3=C(C(OC)=C(C=C3CC[C@@H1](C2=CC1=O)OC(=O)C)NC)CC=O
326	O=C(OC)OC=CC=C1C([C@@H1](NC(=O)C)CCC2=CC(=C(OC)C(OC)=C21)O)C=CC=O
327	O=C(OC)OC=CC=C1C2=C(C(OC)=C(C=C2CC[C@@H1](C1=CC=O)NC(=O)C)OCO)C(=O)C
328	O=C(OC)OC1=CC=C2C3=C(C(OC)=C(C=C3CC[C@@H1](C2=CC1=O)OC(=O)O)CO)SC
329	O=C(OC1)OC=C2C3=CC=C(C(C=C3[C@H1](CCC2=CC(=C1OC)OC)NC=O)C)OOC
330	O=C(OC)OCC(C=C1C(C2=C(C=C(OC)C(OC)=C2OC)CC[C@@H1]1NC(=O)C)=C)=O
331	O=C(OC)OC=1C(C=C2C(=CC=1)C3=C(OC)C(=C(OC)C=C3CC[C@@H1]2NC(=O)C)O)C=O
332	O=C(OC)OCC(C=C1C(C2=C(C=C(OC)C(OC)=C2OC)CC[C@@H1]1NC(C)=O)=CC)=O
333	O=C(C)N[C@H1]1CCC2=CC(=C(OC)C(=C2C=3C1=CC(C(SC)=CC=3)=O)OC(=O)OCC)OC
334	O=C(C)N[C@H1]1CCC2=C(C3=CC=C(SC)C(=O)C=C31)C(=C(C(OC)=C2)OC)OC(OCC)=O
335	O=C(C)N[C@@H1]1C=2C(C3=C(C(=C(OC)C=C3CC1)OC)OC)C=C(OC)C(C=2)=O
336	O=C(C)N[C@H1]1CCC2=CC(=C(OC)C(=C2C=3C1=CC(C(=CC=3)OC(=O)OC)=O)CN)C(=O)COCC
337	O=C(C(C)C)OC1=CC=C2C3=C(CC[C@@H1](C2=CC1=O)NC(C)=O)C=C(OC)C(OC)=C3OC
338	O=C(O1)C=C(C(OC)=CC2CC[C@@H1](CC(C2=C1)C=CC(OC)=COC)OCNCC)OS
339	O=C(C)N[C@@H1]1CC(C2=C(C(=C(OC)C=C2CC1)OC)OC)C=C(SC)C(C)=O
340	O=C(C(C)C)OC1=C2C3=CC=C(C(C=C3[C@H1](CCC2=CC(OC)=C1O)CNCC)=O)OOC
341	O=C(C)N[C@@H1]1CC2(C3=C(C(=C(OC)C=C3CC1)OC)OC)C=C(OC)C(C2)=O
342	O=C(C(C)C)OC1=CC=C2C3=C(C(OC)=C(C=C3CC[C@@H1](C2=CC1=O)NC(=O)C)OC)OC
343	O=C(C)N[C@H1]1CCC2=CC(=C(OC)C(=C2C=3C1=CC(C(=CC=3)OC)O)COC(=O)OC)NC(=O)C=O
344	O=C(CC)OC1=C2CC([C@@H1](NC(C)=O)CCC2=CC(=C1OC)OC)=CC(C(=CC)SC)=O
345	O=C(C)N[C@@H1]1CC(C2=C(C(=C(OC)C=C2CC1)OC)OC)C=C(OC)C(OCC=C)O
346	O=C(C)N[C@H1]1CCC2=CC(=C(OC)C(=C2C=3C1=CC(C(=CC=3)OC(OC)=O)=O)CC)OOC
347	O=C(C)N[C@H1]1CCC2=CC(=C(OC)C(=C2C=3C1=CC(C(=CC=3)SC)=O)OC(=O)OCC)OC
348	O=C(C)N[C@@H1]1C=2C(C3=C(C(=C(OC)C=C3CC1)OC)OC)=CC=C(SC)C(C=2)=O
349	O=C(C)N[C@H1]1CCC2=CC(=C(OC)C(=C2C=3C1=CC(C(=CC=3)OC)O)COOCOC)C=O
350	CC(=O)N[C@H1]C1CC2=CC(OC)=C(OC)C(OC)=C2C3=CC=C(C(=O)C=C31)OC
351	CC(=O)N[C@@H1]1C2=CC(C(SC)=CC=C2C3=C(OC)C(OC)=C(C=C3CC1)OC)=O
352	CC(=O)C1=CC=C(SC)C(C=C1[C@H1]CCC=CC(OC)=COC)NC(=O)CSC
353	CC(=O)N[C@H1]1CCC2=CC(OC)=C(OC)C(OC)=C2C3=CC=C(C(=O)C=C13)O
354	CC(=O)N[C@H1]1CCC2=CC(OC)=C(OC)C(OC)=C2C3=CC=C(C(C=C31)=O)O
355	CC(=O)N[C@H1]1CCC2=CC(OC)=C(OC)C(OC)=C2C3=CC=C(C(C=C31)=O)SC
356	C1C(=O)C=C(C2=CC=C(SC)C(C=C2[C@H1](NC(C)=O)C)C)OC(OC)=C1O
357	C=1C(=O)C2=C(C3=CC=C(SC)C(C=C3[C@H1](CC2)NC=O)COC)C(OC)C=1
358	CC(=O)N[C@H1]C1CC2=CC(OC)=C(OC)C(OC)=C2C3=CC=C(C(=O)C=C31)O
359	C1C(=O)C=C(C2=CC=C(SC)C(C=C2[C@H1](NC(C)=O)C)COC)C(OC)C(=C1)SC
360	CC(=O)C=C(C1=CC2=C(SC)C(C=C1[C@H1](NC(C)=O)C)C)OC2OC
361	C12=C(C3=CC=C(SC)C(C=C3[C@@H1](N)CC1)=CCOC)C2OC=C
362	C=12C(=CC(C(SC)=CC=1)=O)[C@H1](CCC3=CC(OC)=C(OC)C(=C32)N)C
363	CC(=O)N[C@H1]1CCC2=CC(OC)=C(OC)C(OC)=C2C=3C1=CC(C(=CC=3)SC)=O
364	CC(=O)OC1=C2C3=CC=C(SC)C(=O)C=C3[C@H1](CCC2=CC(OC)=C1OC)NC(C)=O
365	C=1C(=O)C(=CC=C2C3=C(OC)C(OC)=CC=C3CC[C@@H1](C2=1)NC=O)COC
366	C=1C(=O)C(OC(=O)C)=CC=C2C3=C(OC)C(=C(OC)C=C3CC[C@@H1](C2=1)OCNC=O)C
367	C=12C(=O)C(=CC=C3C=1[C@H1](CCC4=CC(OC)=C(OC)C(OC)=C34)NCC)OC2
368	CC(=O)OC1=C2C3=CC=C(SC)C(=O)C=C3[C@H1](CCC2=C(OC)C=C1)OCNC(C)=O
369	CC(=O)OC=C1C2=CC=C(SC)C(=O)C=C2[C@H1](CCC1=C(OC)C(OC)=C)OCNC(=O)C
370	CC(=O)N[C@@H1]1C=2C(C3=C(OC)C(=C(OC)C=C3CC1)OC)=CC=C(SC)C(C=2)=O
371	CC(=O)N[C@@H1]1CCC2=CC(OC)=C(C(OC)=C2C=3C1=CC(=O)C(SC)=CC=3)OC
372	C=12C(=O)C(=CC=C3C=1[C@H1](CCC4=CC(OC)=C(OC)C(OC)=C34)NC(C)=O)C2
373	C1=C(C(O)=CC=C1CC([C@@H1](NC(=O)C)CC)=CCC(=CC)SC)OOC(=O)CCOC
374	CCC(=O)OC1=C2C3=CC=C(SC)C(=O)C=C3[C@H1](CCC2=CC(OC)=C1OC)NC(C)=O
375	C123C=C(CC[C@H1](NC(=O)C)C1=CC(C(SC)=C2)=O)C(C(=C3OC)OC)OC
376	CCC(=O)OC=C1C2=CC=C(SC)C(=O)C=C2[C@H1](CCC1=C(OC)C=C)OCOC(=O)OC
377	C=1C=C(OC(=O)OC)C(C=C2C=1C3=C(OC)C(=C(OC)C=C3CC[C@@H1]2NC)C)C=O
378	CCC(=O)OC1=C2C3=CC=C(SC)C(=O)C=C3[C@@H1](NC(=O)C)CCC2=CC(OC)=C1OC
379	CCC(=O)OC=CC=C1C([C@@H1](NC(C)=O)CCC2=CC(OC)=CC(OC)=C21)OC=CC=O
380	CCC(=O)OC=C1C2=CC=C(SC)C(=O)C=C2[C@H1](CCC1=C(OC)C=C)OCOCNC(=O)C
381	C=1C=C(OC(=O)OC)C2(C=CC=1C3=C(OC)C(=C(C(OC)=C3CC[C@@H1]2NC)C)O)COC=O
382	C12C=C(C3=CC=C(SC)C(=O)C=C3[C@@H1](NC(=O)C)C1)C(=C(OC)C(OC)=C2)OC
383	CCC(=O)N[C@H1]1CCC2=C(C(OC)=C(C(OC)=C2)OC)C=3C1=CC(C(SC)=CC=3)=O
384	CCC(=O)OC=C1C2=CC=C(SC)C(=O)C=C2[C@@H1](NC(=O)C)CCC1=CC(OC)=COC
385	C1C=C1C2=CC=C(SC)C(=O)C=C2[C@H1]
386	C=1C=C(OC(=O)OC)C(C=C2C=1C3=C(OC)C(=C(C=C3CC[C@@H1]2NC(C)=O)OC)O)C=O
387	CCC(=O)N[C@H1]1CCC2=CC(OC)=C(C(OC)=C2C=3C1=CC(=O)C(=CC=3)SC)OC(=O)OCC
388	C12C=C(CC[C@H1](NC(=O)C)C1=CC(C(=CC)SC)=O)C=C(OC)C(OC)=C2OC
389	CC=1C(=CC(C(=CC=1)SC)=O)[C@H1](CCC2=CC(OC)=C(OC)C(=C2)OC)NC(=O)C
390	CC(C)COCCN[C@H1]1CCC2=CC(OC)=C(C(=C2C=3C1=CC(C(=CC=3)SC)=O)OC)OC(=O)C
391	CC(C)C(=O)OC1=C2C3=CC=C(SC)C(=O)C=C3[C@H1](CCC2=CC(OC)=C1OC)NC(C)=O
392	CC(C)C(=O)OC1=C2C3=CC=C(SC)C(=O)C=C3[C@H1](CCC2=CC(OC)=C1OC)NC(=O)C
393	CC(C)CCN[C@H1]1CCC2=C(C3=CC=C(SC)C(C=C31)=O)C(=C(C(OC)=C2)OC)OCCC
394	CC(C)CCN[C@H1]1CCC2=C(C3=CC=C(SC)C(C=C31)=O)C(=C(C(OC)=C2)OC)OC(=O)C
395	CC(C)C(OC1=C2C3=CC=C(SC)C(=O)C=C3[C@H1](CCC2=CC(OC)=C1OC)NC=O)C=O
396	C1=C(OC)C(=C(OC)C2=C1CC[C@H1](NC(=O)C)C=3C2=CC=C(OC(=O)OC)C(C=3)=O)C
397	CC(C)CCN[C@H1]1CCC2=C(C3=CC=C(SC)C(C=C13)=O)C(=C(C(OC)=C2)OC)OCCC
398	CC(=O)N1[C@H1]CCC2=CC(OC)=C(OC)C(OC(=O)C)=C2C=3C1=CC(C(=CC=3)SC=O)CC=O
399	C=1C(=CC(C(SC)=CC=1)=O)[C@H1](CCC=CC(OC(=O)C(C)C=COC)C(=C)OCNC=O)CSC
400	CC(=O)OCC1=CN(N=N1)[C@H1]2CCC3=CC(OC)=C(OC)C(=C3C=4C2=CC(C(NC)=CC=4)=O)OC
401	C12=C(C=C(OC)C(OC)=C1OC(=O)C3=CC)CC=C3C=CC=C(CC2O[C@@H1]NC(C)=O)C
402	O=C(OC1)OC=CC=C2C3=C(OC)C(=C(OC)C=C3CC[C@H1](NC(=O)C)C2=CC1)OOC
403	O=C(OC1)OC=CC=C2C3=C(OC)C(=C(OC)C=C3CC[C@@H1](NC(C)=O)C2=CC1)OO
404	O=C(OC)OC1=CC=C2C3=C(OC)C(=C(OC)C=C3CC[C@@H1](C2=CC1=O)NC=O)COC
405	O=C(OC1)OC=CC=C2C3=C(OC)C(=C(OC)C=C3CC[C@H1](NC(=O)C)C2=CC1)OO
406	O=C(OC)OC1=CC=C2C3=C(OC)C(=C(OC)C=C3CC[C@@H1](C2=CC1=O)NC(C)=O)OC
407	O=C(OC)OC1=CC=C2C3=C(OC)C(=C(OC)C=C3CC[C@@H1](C2=CC1=O)NCC)OOC
408	O=C(OC)OC1=C2C3=CC=C(SC)C(C=C3[C@@H1](NC(=O)C)CCC2=CC(=C1OC)OC)=O
409	O=C(CC1)OC=CC=C2C3=C(OC)C(=C(OC)C=C3CC[C@H1](NC(=O)C)C2=CC1)OOC
410	O=C(C)N[C@H1]1CCC2=CC(OC)=C(C(OC)=C2C=3C1=CC(=O)C(=CC=3)OC(CC)=O)OC
411	O=C(NC)NCC=CC=CC=C(OC(C1=CC=CC=C1)=O)C(OC)=C(OC)C(OC2)=C(OC)C(OC)=CCCC[C@@H1]C2NC=O
412	O=C(C)N[C@H1]1CCC2=CC(OC)=C(C(OC)=C2C=3C1=CC(C(OC(=O)C)=CC=3)=O)OC
413	O=C(C)N[C@H1]1CCC2=CC(OC)=C(C(OC)=C2C=3C1=CC(C(=CC=3)OC(CC)=O)=O)OC
414	O=C(NC)NCC=CC1=CC=C(OC(C2=CC=CC=C2)=O)C(OC)=C(OC)C(OC)=C(OC)C(OC)=CCCC[C@@H1]C=CC1
415	O=C(C)N[C@H1]1CCC2=CC(OC)=C(C(OC)=C2C3=CC=C(C(=O)C=C13)OCCC)OOC
416	O=C(C)N[C@H1]C1=CC(C(OC(OCC)=O)=CC=C1C2=C(OC)C=C(OC)C=C2CC)OC=O
417	O=C(C)N[C@H1]CC1C2=CC(OC)=CC(OC)=C2C=CC=C(OC(=O)OCC)C(=O)C=C1
418	O=C(C)OC1=C2C=3C([C@@H1](NC(C)=O)CCC2=CC(OC)=C1OC)=CC(=O)C(SC)=CC=3
419	O=C(NC)NCC=CN(C=1OCC)CN(OCCC)CC=CC2=C(OC)C(=C(OC)C=C2CC[C@H1](NC(=O)C)OC=1)C=O
420	O=C(N(C)C)NC1=CC=C2C3=C(OC)C(=C(OC)C=C3CC[C@@H1](C2=CC1=O)NCC)OOC
421	O=C(C)N[C@H1]1CCC=C(C2=CC=C(SC)C(C=C12)=O)C(OC(CC)=O)=C(C(OC)=C)OC
422	O=C(C=CC=C(O)C)CC1=CC=C(SC)C(=O)C=C1C2=CC(OC)=C(OC)C=C2CC[C@@H1]
423	O=C(N)N[C@H1]1CCC2=CC(OC)=C(C(OC)=C2C=3C1=CC(C(OC(=O)C)=CC=3)=O)OC
424	O=C(C)N[C@H1]1CCC2=CC(OC)=C(C(OC)=C2C3=CC=C(C(=O)C=C31)OC(=O)O)CCOC
425	O=C(C)N[C@H1]1CCC2=CC(OC)=C(C(OC)=C2C=3C1=CC(C(OC(=O)CC)=CC=3)O)C=O
426	O=C(N)N[C@H1]1CCC2=CC(OC)=C(C(OC)=C2C3=CC=C(C(C=C31)=O)O)C(=O)OCNC
427	O=C(C)N[C@H1]1CCC2=CC(OC)=C(C(OC)=C2C=3C1=CC(=O)C(OC(CC)=O)=CC=3)OC
428	CC(=O)N[C@H1]1CCC2=CC(OC)=C(OC)C(OC)=C2C3=CC=C(NC)C(=O)C=C31
429	CC(=O)N1[C@@H1]C2=CC(C(NC)=CC=C2C3=C(OC)C(OC)=C(OC)C=C3C1)=O
430	CC(=O)N[C@@H1]C1=CC(C(NC)=CC=C1C2=C(OC)C(OC)=C(OC)C=C2CC)N=O
431	CC(=O)N[C@@H1]C1=C2C(C(NC)=CC=C1C3=C(OC)C(OC)=C(OC)C=C3CC2)=O
432	C1[C@H1](N)C(=C)C2=CCC1=CC(C(OC(C)=O)=C2)C=C(OC)C(OC)=COCSC
433	CC(=O)N[C@@H1]1C2=CC(C(NC)=CC=C2C3=C(OC)C(OC)=C(OC)C=C3C1)NC=O
434	CC(=O)N1[C@H1]CCC2=CC(OC)=C(OC)C(OC)=C2C3=CC=C(NC)C(C=C31)=O
435	C=1C(=CC=C(C2=O)OCC[C@H1]CCC3=CC(OC)=C(OC)C(OC)=C3C2)CC=1SC
436	C1C(=O)OCC2=CC=CC3=C(OC)C(OC)=C(OC)C=C3CC[C@H1](NC(C)=O)C2=CC1=O
437	CC(=O)OCC=CC=C1C2=C(OC)C(OC)=C(OC)C=C2CC[C@H1](NC(C)=O)C1=CSC
438	CC(=O)N1[C@@H1]C2=CC(C(NC)=CC=C2C3=C(OC)C(OC)=C(OC)C=C3CC1)=O
439	CC(=O)N[C@@H1]C1=C2C(C(NC)=CC=C1C3=C(OC)C(OC)=C(OC)C=C3CC2)N=O
440	CC(=O)N1[C@@H1]C2=CC(C(NC)=CC=C2C3=C(C(OC)=C(OC)C=C3CC1)OC)NC=O
441	CC(=O)OC=CC=C1C2=C(OC)C(OC)=C(OC)C=C2CC[C@H1](NC(C)=O)C1=CCSC=O
442	CC(=O)N[C@H1]C1CC2=CC(OC)=C(OC)C(OC)=C2C3=CC=C(SC)C(C=C31)=O
443	CC(=O)N[C@@H1]1C2=CC(C(NC)=CC=C2C3=C(OC)C(OC)=C(OC)C=C3C1)=O
444	C12=C(C=3C([C@H1])(C4C1)N=C(Cl)C=C4CCC(SC)=CC=3)OC=C2OCNC
445	C1OC=C2C3=CC=C(NC)C(=O)C=C3[C@H1](CCC2=CC(OC)=C1OC)N
446	CNCCC=C1C(C2=C(OC)C(OC)=CC=C2CC[C@@H1]1NOC)=O
447	C1OC=CC2=C(CC(O)CC1=CC=C(OC)C(=C2)C)C(OC)C(=C)OCSC
448	C1OC=CC2=C(CC(O)CC1=CC=C3C(OC)=C(OC)C)P=C3C2OCSC
449	CSCC=CC=CC1=C(OC)C=C(C=C1CC[C@@H1]NC(N)=NOCOC)O
450	C1OC=C2CC([C@@H1](N)CCC2=CC(OC)=C1OC=CC)(C(=CC)SC)O
451	C1OC=C2CC([C@@H1](N)CCC2=CC(OC)=C1O)C=CC(C(=CC)S)C=O
452	C1OC=C2C=3C([C@H1](CCC2=C1)N=CCC(=CC=3)SC)=O
453	COC=C1C2=CC=C(NC)C(=O)C=C2[C@H1](CCC1C=COC)NC(=O)NNC
454	COC=C1C2=CC=C(NC)C(=O)C=C2[C@H1](CCC1C=COC)NC(=O)N
455	COC1=C2C3=CC=C(NC)C(=O)C=C3[C@H1](CCC2=CC(OC)=C1OC)NO
456	C1OC=C2CC([C@H1](CCC2=C1)NC=CCC(SC)=CC)=O
457	COC1=C2C3=CC=C(NC)C(=O)C=C3[C@H1](CCC2=CC(OC)=C1OC)N
458	C1=C2CC[C@H1](C3=CCC(SC)=CC=C3C2=C(C(OC)=C1OC)OC=O)[N-1]
459	COC1=C2C3=CC=C(NC)C(=O)C=C3[C@H1](CCC2=CC(OC)=C1OC)NN=NC=C
460	C=C1CC2[C@H1](CCC3=C(C(OC)=C(OC)C(=C3)OC)C2)CC=C1N=[N+1]=[N-1]
461	C=1NCC(C=C2C(C3=C(OC)C=C(C=C3CC[C@@H1]2N=[N+1]=[N-1])OC)OC=C)C=1O
462	C=CCC1[C@H1](C2C=[N+1]C=C1CC(OC)=C(OC)C(=C)OC=CC=CSC)C2N=[N+1]=[N-1]
463	COC=C1C2=CC=C(NC)C(=O)C=C2[C@H1](CCC1C=COC)N3N=NC=C3
464	COC=C1C2=CC=C(SC)C(=O)C=C2[C@@H1](NCCCCCCCC)CCC1=CC(=COC)SC
465	COC=C1C2=CC=C(NC)C(=O)C=C2[C@@H1](N=[N+1]=[N-1])CCC1=CC(=COC)OC
466	COC1=C2C3=CC=C(NC)C(=O)C=C3[C@H1](CCC2=CC(=C1OC)OC)NCCCS
467	C1OC=CC2=C(C3=C(OC)C(OC)=CC=C3CC[C@@H1]2N=[N+1]=[N-1])CC=C1NC
468	COC1=C2C3=CC=C(NC)C(=O)C=C3[C@H1](CCC2=CC(OC)=C1OC)N=[N+1]=[N-1]
469	COC=CC=C(C1=C2C=C(NC)CC=C1[C@H1](C)N=[N+1])[N-1]CC(OC)=C2OC
470	COC1=CC=C(C2=CC=C(NC)CC=C2[C@H1](C)N=[N+1])[N-1]CC(OC)=C1OC
471	C=CCC1[C@H1](CC=[N+1]C2=C(C(OC)=C(OC)C=C2C1O)C=O)[N-1]CCC
472	COC1=C(OC)C(OC)=CC=2CC[C@@H1](C3=CC(=O)C(NC)=CC=C3C=21)N4C=CN=N4
473	C=12[C@@H1](C=CC(=O)C(C)=CC=1C3=C(CC2)C=C(OC)C(OC)=C3OCNC)CNC=C
474	COC=C(OC)C(OC)=CC=1CC[C@H1](NC(=N)N)C2=CC(=O)C(=CC=C2C=1)CNC
475	C1[C@@H1](C2=CC(=O)C(SC)=CC=C2C3=C(C=C(OC)C(=C3OC)OC)C1N)CCNC
476	C12=CC(C(SC)=CC=C1C3=C(C=C(C(OC)=C3OC)OC)CC[C@@H1]2NCC(C)CN)C=O
477	COC1=C(OC)C(OC)=C2CCC[C@H1](N3C=CN=N3)C4=CC(=O)C(=CC=C4C21)NC
478	C12=CC(C(=CC=C1C3=C(C=C(OC)C(OC)=C3OC)CC[C@@H1]2NCCO)C)NC
479	COC=C(OC)C(OC)=C1CCC[C@H1](N2C=CN=N2)C3=CC(=O)C(=CC=C3C1)NC
480	C1[C@@H1](C2=CC(=O)C(NC)=CC=C2C3=C(C=C(OC)C(=C3OC)OC)C1)NCCSC
481	N(C1=CC=C2C3=C(CC[C@@H1](C2=CC1=O)N4C=CN=N4)C=C(OC)C(OC)=C3O)CC
482	CNC(NCCCC)=S[C@@H1]C1=CC(=O)C(NC)=CC=C1C2=C(C=C(OC)C(=C2OC)OC)CCF
483	C=1=C2C([C@H1](CCC3=CC(=C(OC)C(=C32)OC)OC)NCCCCCC)CC=CC(C=1SC)=O
484	C1[C@@H1](C2=CC(=O)C(SC)=CC=C2C3=C(C(=C(OC)C=C3C1)OC)OC)NCCCCCCCC
485	N1C(COC(=O)OC=CN1[C@@H1]2)C3=CC(=O)C(NC)=CC=C3C4=C(CC2)C=C(C(OC)=C4OC)OC
486	C12=CC(C(NC)=CC=C1C3=C(C=C(C(OC)=C3OC)OC)CC[C@@H1]2N4C=C(N=N4)CCC)=O
487	COC1=C(OC)C(OC)=CC=2CC[C@@H1](C3=CC(=O)C(NC)=CC=C3C=21)N4C=C(N=N4)CCC
488	N1C(COC(=O)OC=CN1[C@@H1]2)C3=CC(=O)C(NC)=CC=C3C4=C(CC2)C=C(C(=C4OC)OC)OC
489	CNC(C(C)O)N[C@@H1]1CC(C2=C(C(=C(OC)C=C2CC1)OC)OC)=CC=C(NC)C(C)=O
490	C=C1C([C@H1](CCC2=CC(=C(OC)C(=C21)OC)OC)NCCCCCC)CC=CC(C(=C)SC)=O
491	CNC(C(C)O)N[C@@H1]1CC(C2=C(C=C(OC)C(OC)=C2OC)CC1)=CC=C(C(=O)C)NC
492	COC1=C(OC)C(=CC=2CC[C@@H1](C3=CC(C(=CC=C3C=21)NC)=O)N4C=C(N=N4)CCC)NCOC
493	COC1=C(OC)C(OC)=CC=2CC[C@@H1](C3=CC(=O)C(NC)=CC=C3C=21)NCCCCCCCCCC
494	C12=CC(C(NC)=CC=C1C3=C(C=C(C(OC)=C3OC)OC)CC[C@@H1]2NCCCCCCCCCCC)CSC=O
495	COC1=C(OC)C(OC)=CC=2CC[C@@H1](C3=CC(=O)C(NC)=CC=C3C=21)N4C=C(N=N4)CCCC
496	CNC(C(C)O)ON(C=1C(C=C2C(=CC=1)C3=C(OC)C=C(C=C3CC[C@@H1]2NCC)CC)O)COC=O
497	C1=C2C(C3=C(C=C(OC)C(=C3OC)OC)CC[C@@H1]2N4C=C(N=N4)CCCC=C)C=C(NC)C1=O
498	CNC(C(C)O)N([C@H1]1CCC2=CC(=C(OC)C(OC)=C2C=3C1=CC(=O)C(=CC=3)NC)OCC)C
499	C1=C2C(C3=C(C=C(OC)C(=C3OC)OC)CC[C@@H1]2NCCCCCCCCCCCC=C)C=C(SC)C1=O
500	COC1=C(OC)C(OC)=CC=2CC[C@@H1](C3=CC(=O)C(NC)=CC=C3C=21)N4C=C(N=N4)CN
501	CNC(C(C)O)N[C@@H1]1C=2C(C3=C(C=C(OC)C(OC)=C3OC)CC1)=CC=C(C(=O)C=2)NC
502	CNC(=S)N[C@@H1]1C2=CC(=O)C(NC)=CC=C2C3=C(C=C(OC)C(OC)=C3OC)CC1
503	C12=CCC(NC)=CC=C1C3=C(C=C(C(OC)=C3OC)OC)CC[C@@H1]2NCCCCCCCCCC=O
504	COC1=C(OC)C(OC)=CC=2CC[C@@H1](C3=CC(=O)C(NC)=CC=C3C=21)NCCCCCCCC
505	C=C1C(C2=C(C=C(OC)C(=C2OC)OC)CC[C@@H1]1NCCCCCCCCCCCC)=CC=C(SC)C=O
506	CNC(=S)N[C@@H1]1C2=CC(=O)C(NC)=CC=C2C3=C(OC)C(=C(C=C3CC1)OC)OCO
507	COC1=C(OC)C(OC)=CC=2CC[C@@H1](C3=CC(=O)C(NC)=CC=C3C=21)N4C=C(N=N4)CO
508	COC=C(OC)C=C1CC([C@@H1](NN=NCN=2)CCCCC1=CC=CNC)C(=O)C=2COC
509	CNC(=S)N[C@@H1]1C2=CC(=O)C(NC)=CC=C2C3=C(C(OC)=C(C=C3CC1)OC)OC
510	C1=2C3=C(C(=C(C=C3CC[C@H1](NCCCCCCCC)C1=CCC(=CC=2)NC)OO)CO)COC
511	COC1=C(OC)C(OC)=CC=2CC[C@@H1](C3=CC(=O)C(NC)=CC=C3C=21)N4C=C(N=N4)CON
512	C12=CC(C(NC)=CC=C1C3=C(C=C(C(OC)=C3OC)OC)CC[C@@H1]2N4C=C(N=N4)COO)NC
513	N([C@H1]1CCC2=C(C3=CC=C(C(C=C13)=O)NC)C(OC)=C(OC)C(OC)=C2)N=N
514	COC=C(OC)C(OC)=C1CCC[C@@H1](C2=CC(=O)C(NC)=CC=C12)NCCCCCC
515	C1=C2C([C@H1](CCC3=CC(=C(OC)C(=C32)OC)OC)NCCCCCC)=CC(C(=C1)SC)=O
516	COC1=C(OC)C(OC)=CC=2CC[C@@H1](C3=CC(=O)C(NC)=CC=C3C=21)NCCC4CCCCC4
517	C=C1C([C@H1](CCC2=CC(=C(OC)C(=C21)OC)OC)N3N=NC=C3)CCl
518	COC=C(OC)C(OC)=C1CCC[C@@H1](C2=CC(=O)C(SC)=CC=C12)NCCCCCCCC
519	C1[C@@H1](C2=CC(=O)C(SC)=CC=C2C3=C(C(=C(OC)C=C3C1)OC)OC)NCCCCC
520	COC=C(OC)C(OC)=C1CCC[C@@H1](C2=CC(=O)C(NC)=CC=C12)NCCCCCCCC
521	COC1=C(OC)C(OC)=CC(=C1)CC[C@H1](NCCCCCCCCCCCC)C2=CC(=O)C(SC)=CC=C2
522	C12C3=CC(OC)=C(OC)C=C3CC([C@H1]1NCCCCCCCCC)=CC(=C2OC)OC
523	C12=CC(C(NC)=CC=C1C3=C(C=C(C(OC)=C3OC)OC)CC[C@@H1]2NCCCCCCCCCCF)=O
524	C12=CC(C(NC)=CC=C1C3=C(C=C(C(OC)=C3OC)OC)CC[C@@H1]2N4C=C(N=N4)CCl)NC
525	COC1=C(OC)C(OC)=CC=2CC[C@@H1](C3=CC(=O)C(NC)=CC=C3C=21)NCCC4=CC=CC=C4
526	COC1=C(OC)C(OC)=CC=2CC[C@@H1](C3=CC(=O)C(NC)=CC=C3C=21)N4C=C(N=N4)CCl
527	COC1=C(OC)C(OC)=CC=2CC[C@@H1](C3=CC(=O)C(NC)=CC=C3C=21)NCCC(F)(F)F
528	C1=C2C(C3=CC=C(C(=O)C=C3[C@H1](CC2)NCCC4=CC=CC=C4)OS)CC(OC)=C(OC)C(=C1)OC
529	C1[C@@H1](C2=CC(=O)C(SC)=CC=C2C3=C(C(=C(OC)C=C3C1)OC)OC)NCCC4=CC=CC=C4
530	COC1=C(OC)C(OC)=CC=2CC[C@@H1](C3=CC(=O)C(NC)=CC=C3C=21)NCCC4=CC=CC=C4NC
531	C12=CC(C(NC)=CC=C1C3=C(C=C(C(OC)=C3OC)OC)CC[C@@H1]2NCCC4=CC=CC=C4C)SC
532	C1[C@@H1](C2=CC(=O)C(SC)=CC=C2C3=C(C(=C(OC)C=C3C1)OC)OC)NCCC=CC=CC
533	CNC(C(C)C)N[C@@H1]1C2=CC(=O)C(NC)=CC=C2C3=C(C(=C(OC)C=C3CC1)OC)OC
534	C=C1C([C@H1](CCC2=CC(=C(OC)C(=C21)OC)OC)NCCCCC=C)C(C(SC)=C)=O
535	C12=CCC(NC)=CC=C1C3=C(C=C(C(OC)=C3OC)OC)CC[C@@H1]2NCCC4=CC=CC=C4C
536	CN(C(=S)N[C@@H1]1C2=CC(=O)C(NC)=CC=C2C3=C(C=C(OC)C(OC)=C3OC)CC1C)C#N
537	C=C1C([C@H1](CCC2=CC(=C(OC)C(=C21)OC)OC)NCCCCCC)C=CC(C(SC)=C)=O
538	C=1=CC([C@@H1](NN=NC=N)NCCCCC=C(C(OC)=COC)OC=CC)(O)C(=CC=1)NC
539	C=C1C([C@H1](CCC2=CC(=C(OC)C(=C21)OC)OC)NCCCCCC)=CC(C(SC)=C)=O
540	COC1=C(OC)C(OC)=CC=2CC[C@@H1](C3=CC(=O)C(NC)=CC=C3C=21)N4C=C(N=N4)CCO
541	COC1=C(OC)C(OC)=CC=2CC[C@@H1](C3=CC(=O)C(NC)=CC=C3C=21)N4C=C(N=N4)CCONC
542	COC1=C(OC)C(OC)=CC=2CC[C@@H1](C3=CC(=O)C(NC)=CC=C3C=21)NCCCCCCCCCCCC
543	C12=CC(C(NC)=CC=C1C3=C(C=C(C(OC)=C3OC)OC)CC[C@@H1]2N4C=C(N=N4)CCC)Cl
544	CN(C(=S)N[C@@H1]1C2=CC(=O)C(NC)=CC=C2C3=C(C(=C(OC)C=C3CC1)OC)OC)CC#N
545	C1OC=C(OC)C(OC)=C2C1CC[C@@H1](C3=CC(=O)C(NC)=CC=C23)NCCCCCCCC=C
546	CC(C)(O)C=1N=NN(C=1)[C@@H1]2C3=CC(C(NC)=CC=C3C4=C(OC)C(OC)=C(OC)C=C4CC2)=O
547	CC(C)C(=O)OCCC=C1[C@H1](CCC2=CC(OC)=C(OC)C(OC)=C2C1=CCN)SC=O
548	C[C@H1](OCCC)CCC1=C(OC)C(OC)=C(OC)C=C1CC=CC=CC(=O)CSCN
549	CC(C)(C)OC1=CN(N=N1)[C@H1]C2CC3=CC(OC)=C(OC)C(OC)=C3C4=CC=C(NC)C(=O)C=C42
550	CC(C)N(C(C)C)C(=O)N[C@@H1]1C2=CC(C(NC)=CC=C2C3=C(OC)C(OC)=C(OC)C=C3CC1)=O
551	C=C(OC)C1=C(OC)C=2C3=CC=C(SC)CC=C3[C@H1](CCC1=2)C=O
552	CC(C)CCCCCCN[C@@H1]1C2=CC(C(SC)=CC=C2C3=C(C(OC)=C(OC)C=C3CC1)OC)=O
553	CC(C)(C)C(=O)N[C@@H1]1C=2C(C3=C(C(OC)=C(OC)C=C3CC1)OC)=CC=C(NC)C(=O)C=2
554	C1=C(OC)C(OC=2)=C(OC)C3CC([C@H1](CCC3=C1)NC(C)=O)SC=CC=2OSC
555	C=CCCOCC(C=C1[C@H1](CCC2=CC(OC)=C(OC)C(OC)=C2C1=CCN)C(=O)C=O)SC=O
556	OC(CCC(C)C)OCC1=CN(N=N1)[C@H1]CCC2=CC(OC)=C(OC)C(OC)=C2C3=CC=C(C(=O)C=C3)NC
557	O=C(CCCCCCC)C=O
558	O=C(NCC1=CC=CC=C1Cl)N[C@H1]2CCC3=C(C(OC)=C(OC)C(OC)=C3)C4=CC=C(NC)C(=O)C=C24
559	N([C@H1]1CCC2=C(C(OC)=C(OC)C(OC)=C2)C3=CC=C(NC)C(C=C13)=O)C(O)=O
560	O=C(NC1=CC=C(C=C1)F)N[C@H1]2CCC3=C(C(OC)=C(OC)C(OC)=C3)C4=CC=C(NC)C(=O)C=C24
561	O=CC=CCC=CNNC(N[C@H1]1CCC2=CC(OC)=C(OC)C(OC)=C2C3=CC=C(NC)C(=O)C=C13)=O
562	OC1(CCCCC1)C2=CN(N=N2)[C@H1]3CCC4=CC(OC)=C(OC)C(OC)=C4C5=CC=C(NC)C(=O)C=C35
563	O=C(C=CNCC(=O)OCCN[C@H1]1)CCC2=C(C(OC)=C(OC)C(OC)=C2)C3=CC=C(NC)C(=O)C=C13
564	C12[C@H1]CC(C3=C(OC)C(OC)=C(OC)C=C3C1=CC=COC(OCC)=O)=C2SC=CC=O
565	OC(CCC1(C)C)OC=C(C(OC)=C2CCC[C@H1](NC(C)=O)C3=CCC(SC)=CC=C3C21)O
566	OC(CCC(C)C)OCC1=CN(N=N1)[C@H1]2CCC3=CC(OC)=C(OC)C(OC)=C3C4=CC=C(NC)C(=O)C=C24
567	OC(CCC1(C)C)OC=C(C(OC=2)=CCCC[C@H1](NC(C)=O)C3=CCC(SC)=CC=C3C=21)O
568	O=C(C(=O)OCC)C1OC=CC=CC2=C(OC)C(OC)=C(OC)C=C2CC[C@H1](NC(=O)C)C=CC1=O
569	C=CCC(=O)OCCC=C1[C@H1](CCC2=C(C(OC)=C(OC)C(OC)=C2)C1=C)N=O
570	C12[C@H1]CC(C3=C(OC)C(OC)=C(OC)C=C3C1=CC=C(SC)C)(C=C2)ONC(=O)C
571	C=C1C(C2=CC=C(C(=O)C=C2[C@@H1](NCCCCCCCCCCCC)CC1)COC)C(OC)=COCOC
572	C=1N([C@H1]2CCC3=C(C4=CC=C(C(C=C24)=O)NC)C(OC)=C(OC)C(=C3)OC)N=NC=1C
573	COC1=C(OC)C(OC)=CC=2CC[C@@H1](C3=CC(=O)C(NC)=CC=C3C=21)N4C=C(N=N4)C5=CC=CC=C5
574	C1=C2C(C3=CC=C(C(=O)C=C3[C@H1](CC2)N4C=C(N=N4)CC(Cl)Cl)ONC)C(OC)=C(OC)C(=C1)OC
575	C=C1C([C@H1](CCC2=CC(=C(OC)C(=C21)OC)OC)NCCCCCCCCCCC)C=CC(CNC)=O
576	C1=C2C(C3=C(C=C(OC)C(=C3OC)OC)CC[C@@H1]2N4C=C(N=N4)C5=CC=CC=C5)=CC=C(NC)C1=O
577	C1[C@@H1](C2=CC(=O)C(NC)=CC=C2C3=C(C(=C(OC)C=C3C1)OC)OC)N4C=C(N=N4)CCO
578	C1=C2C(C3=CC=C(C(=O)C=C3[C@H1](CC2)N4C=C(N=N4)C=CC=CC=N)C=C)OCNC(OC)=C1OC
579	C=1N([C@H1]2CCC3=C(C(=C(OC)C(OC)=C3)OC)C=4C2=CC(C(=CC=4)NC)=O)N=NC=1C
580	C=C1C(C2=CC=C(C(=O)C=C2[C@H1](CC1)N3C=C(N=N3)C=CC=CC=N)C=C)OCNCOCOCC
581	COC1=C(OC)C(OC)=CC=2CC[C@@H1](C3=CC(=O)C(NC)=CC=C3C1=2)N4C=C(N=N4)C5=CC=CC=C5
582	C1C2=CC(OC)=C(OC)C(=C2CC([C@H1](C1)NC/C=C/C3=CC=CC=C3)=CC(=O)C(=CC)SCO)C
583	C1=C2C(C3=CC=CC(=O)C=C3[C@H1](CC2)N4C=C(N=N4)C=CC=CC=C)(OC)C(OC)=C1OCNC
584	C=C1C(C2=C(C=C(OC)C(=C2OC)OC)CC[C@@H1]1N3C=C(N=N3)C4=CC=CC=C4)=CC=C(NC)C=O
585	OC1=C(C=CC=C1)C=2N=NN(C=2)[C@H1]3CCC4=CC(OC)=C(OC)C(OC)=C4C5=CC=C(NC)C(=O)C=C35
586	C=CC=CC(=O)OCCC=C1[C@H1](CCC2=CC(OC)=C(OC)C(OC)=C2C1=CN)OSCC
587	OCC(C(F)F)F
588	C[C@H1](CCC1=C(C(OC)=C(OC)C(OC)=C1)C2=CC=C(C(C=C2)=O)SCNC=O)COC
589	N1=CC=C(C=C1)C(OC=CC=C2C3=C(OC)C(OC)=C(OC)C=C3CC[C@@H1](C2=CC=O)NC(=O)CSC)=O
590	C=[C@H1]C1=CCC(OC(C2=CC=CC=C2)=O)=CC=C1C3=C(OC)C(OC)=C(OC)C=C3CC
591	N1=CC=C(C2=C1)COC3=CC=C4C5=C(OC)C(OC)=C(OC)C=C5CC[C@@H1](C4=CC3=O)N2
592	OC1=C(C=CC=C1)C=2N=NN(C=2)[C@H1]C3CC4=CC(OC)=C(OC)C(OC)=C4C5=CC=C(NC)C(=O)C=C53
593	N=C=C(N=NC(C(C)OC)[C@H1]CCC1=CC(OC)=C(OC)C(OC)=C1C2=CC=C(NC)C=O)C=C2
594	C12=CC=C(S1=C3)C(=O)C=C2[C@H1](CCC=CC(OC)=C(OC)C(OC)=C3)NC(C)=O
595	OC=C(SC)C(C(OC=1)=CCC2([C@H1](NC(C)C)C=CCC2=CC=C=1)NC=O)NCOC
596	OC1=C(C=CC=C1)C=2N=NN(C=2)[C@H1]CCC3=CC(OC)=C(OC)C(OC)=C3C4=CC=C(NC)C(=O)C=C4
597	OC1=C(C=CC=C1)CN[C@@H1]2C=3C(C4=C(C(OC)=C(OC)C=C4CC2)OC)=CC=C(SC)C(=O)C=3
598	CNCC(O)(C1OC=CC=C1CN[C@@H1]2C3=C)C(C(NC)=CC=C3C4=C(C(OC)=C(OC)C=C4CC2)OC)=O
599	C=CC1=C(COC2=CC(CC[C@H1](NC(C)=O)C3=CC(C(SC)=CC=C32)=C)C(OC)=C1OOC)OC
600	C=CC=CCOC=CC=C1C([C@H1](CCC2=CC(OC)=C(OC)C(OC)=C21)NC(=O)C)=O
601	COC1=C(OC)C(OC)=CC=2CC[C@@H1](C3=CC(=O)C(NC)=CC=C3C=21)N4C=C(N=N4)C5=CC=CC=N5
602	C=1N([C@H1]2CCC3=C(C(=C(OC)C(OC)=C3)OC)C=4C2=CC(=O)C(NC)=CC=4)N=NC=1
603	C1[C@@H1](C2=CC(=O)C(NC)=CC=C2C3=C(C(=C(OC)C=C3C1)OC)OC)N4C=C(N=N4)COC
604	C=1N([C@H1]2CCC3=C(C4=CC=C(C(C=C24)=O)NC)C(OC)=C(C(OC)=C3)OC)N=NC=1
605	C=1=C2C(C3=C(C=C(OC)C=C3CC[C@@H1]2N4C=C(N=N4)C=CC)OCOC)OC=CC=CC=1O
606	C1=C2C(C3=C(C=C(OC)C(=C3OC)OC)CC[C@@H1]2N4C=C(N=N4)C5=CC=CC=N5)=CC=C(NC)C1=O
607	C=1N([C@H1]2CCC3=C(C(=C(OC)C(OC)=C3)OC)C=4C2=CC(=O)C(=CC=4)NC)N=NC=1C
608	N1([C@H1]2CCC3=C(C4=CC=C(NC)C(=O)C=C24)C(=C(C(OC)=C3)OC)OC)N=NC(=C1)CO
609	NC(C1OC(=O)OC=CN1[C@@H1]2)C3=CC(C(=CC=C3C4=C(CC2)C=C(C(OC)=C4OC)OC)NC)=O
610	COC1=C(OC)C(=CC=2CC[C@@H1](C3=CC(=O)C(NC)=CC=C3C1=2)N4C=C(N=N4)COCC5=CC=CC=C5)OC
611	COC1=C(OC)C(OC)=CC=2CC[C@@H1](C3=CC(=O)C(NC)=CC=C3C=21)N4C=C(N=N4)COCC5=CC=CC=C5
612	C=C1C(C2=CC=C(C(=O)C=C2[C@H1](CC1)N3C=C(N=N3)COCC4=CC=CC=C4)COC)C(OC)=COCNC
613	C1=C2C(C3=CC=C(C(=O)C=C3[C@@H1](N4C=C(N=N4)C5=NC=CC=C5)CC2)NC)=C(OC)C(OC)=C1OC
614	C=C1C(C2=CC=C(C(=O)C=C2[C@@H1](N3C=C(N=N3)C4=NC=CC=C4)CC1)NC)=C(OC)C(OC)=COC
615	COC1=C(OC)C(OC)=CC=2CC[C@@H1](C3=CC(=O)C(NC)=CC=C3C1=2)N4C=C(N=N4)COCC5=CC=CC=C5
616	C1=CC(C2=CC=C(C(=O)C=C2[C@@H1](N3C=C(N=N3)C4=NC=CC=C4)C1N)C=C)(OC)C(OC)=COC
617	C1=C2C(C3=CC=C(C(C=C3[C@H1](CC2)N4C=C(N=N4)C5=CC=CC=N5)N)C=C)(C(=C1OC)OC)OC
618	C=1N([C@H1]2CCC=C(C3=CC=C(C(C=C23)=O)NC)C(OC)=C(OC)C(=C)OC)N=NC=1C(=O)OC
619	C=1N([C@H1]2CCC3=C(C4=CC=C(C(C=C24)=O)NC)C(OC)=C(OC)C(=C3)OC)N=NC=1C(=O)OC
620	O=C(OC)C1=CN(N=N1)[C@H1]2CCC3=CC(OC)=C(OC)C(OC)=C3C4=CC=C(NC)C(=O)C=C24
621	O=C(OC)NCC=1N=NN(C=1)[C@H1]2CCC3=CC(OC)=C(OC)C(OC)=C3C4=CC=C(NC)C(=O)C=C24
622	O=C(OC)NCC=1N=NN(C=1)[C@@H1]2C3=CC(C(NC)=CC=C3C4=C(OC)C(OC)=C(OC)C=C4CC2)=O
623	O1CC=CC=C1CN[C@H1]2CCC3=CC(OC)=C(OC)C(OC)=C3C4=CC=C(NC)C(C=C24)=O
624	O=C(OCC)CN(OCC)C(CN[C@@H1]1C2=CCC(NC)=CC3=C2C=C(CC1)C=C(OC)C(=C3OC)N)C=O
625	O=C(OC)NCC=1N=NN(C=1)[C@@H1]2C3=CC(C(NC)=CC=C3C4=C(OC)C(OC)=C(C=C4CC2)OC)=O
626	O=C(OC)C=1N=NN(C=1)[C@H1]2CCC3=CC(OC)=C(OC)C(OC)=C3C4=CC=C(NC)C(=O)C=C24
627	O1CC=C2C=C1C3=C(OC)C(OC)=C(OC)C=C3CC[C@H1](CCCC=C2O)CN=CCSC
628	O=C(OCC)C1=CN(N=N1)[C@H1]2CCC3=CC(OC)=C(OC)C(OC)=C3C4=CC=C(NC)C(=O)C=C24
629	OC=CC=CC1=C(C=C(OC)C(OC)=C1OC(OCC)=O)NC(C)=O
630	O=C(C(C)C=1)OCCC=C2[C@H1](CCC3=CC(OC)=C(OC)C(OC)=C3C2=CC=1N)ONC
631	O=C(OCC)CN(CCO)N[C@H1]1CCC2=CC(OC)=C(OC)C(OC)=C2C3=CC=C(NC)C(=O)C=C13
632	O=C(OC(C)(C)C)N[C@H1]1CCC2=C(C(OC)=C(OC)C(OC)=C2)C3=CC=C(NC)C(=O)C=C13
633	O=C(C(C)C=1)OCCC=C2[C@H1]CCC3=CC(OC)=C(OC)C(OC)=C3C2=CC=1N
634	O=C(OCC)CN(OCC)C[C@@H1]1C2=CC(C(NC)=CC=C2C3=C(C(OC)=C(OC)C=C3CC1)OC)=O
635	O=C(C)OC1=CN(N=N1)[C@H1]2CCC3=CC(OC)=C(OC)C(OC)=C3C4=CC=C(NC)C(=O)C=C24
636	O=C(O)C=C(OC)CC=C1C(C2=C(OC)C(OC)=C(OC)C=C2CC[C@@H1]1N=CCS)C=O
637	O=C(C)N[C@@H1]1CC(C2=C(C(OC)=C(OC)C=C2CC1)OC(CC)=O)=CC=C(SC)C(=O)C
638	O=C(O)C=C(OC)CC=C1C(C2=C(OC)C(OC)=C(OC)C=C2C=3C[C@@H1]1N=CC=3S)C
639	O=C(C)N[C@@H1]1C2=CCC(SC)=CC=C2C3=C(C(OC)=C(OC)C=C3CC1)OC=O
640	O=C(C1)N[C@@H1]2CC(C3=C(C(OC)=C(OC)C=C3CC2)OC(CC)=O)=CC=C(SC)C1=O
641	O=C(C)N[C@@H1]1C2=CCC(SC)=CC=C2C3=C(C(OC)=C(OC)C=C3CC1)OCSC=O
642	O=C(C)N[C@@H1]1C2=CCC(SC)=CC=C2C3=C(C(OC)=C(OC)C=C3CC1)OCSCOC=O
643	O=C(O)C=C(C(OC1C)=O)[C@H1]CCC2=CC(OC)=C(OC)C(OC)=C2C3=CC=C(SC)C(=O)C=C31
644	O=C(C)N[C@@H1]1C2=CCC(SC)=CC=C2C3=C(C(OC)=C(OC)C=C3CC1)OCOC=O
645	O=C(OCC)CN(CCC)C[C@H1]C1CC2=CC(OC)=C(OC)C(OC)=C2C3=CC=C(SC)C(=O)C=C31
646	O=C(C(C)C=1)OCCC=C2[C@H1](CCC3=CC(OC)=C(OC)C(OC)=C3C2=CC=1)NSC=O
647	O=C(C1=C(C(OCC)=O)N(N=N1)[C@@H1]C2=C3C(C(NC)=CC=C2C4=C(C(OC)=C(OC)C=C4CC3)OC)=O)O
648	C1[C@@H1](C2=CC(C(NC)=CC=C2C3=C(OC)C(OC)=C(C=C3C1)O)C)NC(C(O)=O)=CC(=O)ONC=O
649	C1=C2CC(OC(C3=CC=CC=C3)=O)=CC=C1C4=C(OC)C(OC)=C(OC)C=C4CC[C@H1](NC(=O)C)C2=O
650	C=NC(=CC=CC=C)Cl
651	C1=CCC(OC(C2=CC=CC=C2)=O)=CC=C1C3=C(OC)C(OC)=C(OC)C=C3CC[C@H1](NC(=O)C)C=O
652	C1N([C@@H1]2C3=CCC(SC)=CC=C3C4=C(OC)C(OC)=C(C=C4CC2)OCN)C(C(O)=O)=C1O
653	C1=CC(C=C(C1(OC(C)=C=2)OC(=O)CCC=C3N=C4CNC)CC=C3C=2C(OC)=COC)C=C4NC=O
654	C1=CC1(C=CN(COC(OC)=O)N=NN)[C@H1]C2CC3=CC(OC)=C(OC)C(OC)=C3C=CC=C(NC)C(=O)C=C2
655	C1N([C@@H1]2C3=CCC(SC)=CC=C3C4=C(OC)C(OC)=C(C=C4CC2)OC=O)N(C(C)C)OC1
656	C1[C@@H1](C2=CCC(SC)=CC=C2C3=C(OC)C(OC)=C(C=C3C1)OC=O)NC(C(=O)O)=CNC
657	N1([C@@H1]CCC1=C2C=C(CNC)CC=C2C3=C(OC)C(OC)=C(OC)C=C3C)NC(Cl)=O
658	OC(OC(C)CC12)=C(C(OCC)=O)N=NN1[C@H1]3CCC4=CC(OC)=C(OC)C(OC)=C4C=CC=C(NC)C(=O)C=C32
659	O=C(C1=C(C(OCC)=O)N(N=N1)[C@@H1]C2=C3CC(NC)=CC=C2C4=C(C(OC)=C(OC)C=C4CC3)OC)OO
660	O=CC1=C(C(OCC)=O)N(N=N1)[C@@H1]C2=C3C(C(NC)=CC=C2C4=C(C(OC)=C(OC)C=C4CC3)OC)=O
661	C1[C@@H1](C2=CC(C(SC)=CC=C2C3=C(OC)C(OC)=C(C=C3C1)O)C)NC(C(O)=O)=C(COCC)OOSC=O
662	C=C1C(C2=C(OC)C(OC)=C(OC)C=C2CC[C@@H1]1NC(C(O)=O)=C(NCO)OC=CC=CC(=O)C)SCNC
663	O=C(C(Cl)Cl)NC(=O)N[C@H1]1CCC2=C(C(OC)=C(OC)C(OC)=C2)C3=CC=C(NC)C(=O)C=C13
664	O=C(C(Cl)Cl)NC(=O)N[C@H1]1CCC2=C(C(OC)=C(OC)C(OC)=C2)C3=CC=C(C(C=C31)=O)NCC(=O)OC
665	O=C(C(Cl)Cl)NC(=O)N[C@H1]1CCC2=C(C(OC)=C(OC)C(OC)=C2)C3=CC=C(C(C=C31)=O)NCN(O)CCC=O
666	O=C(C(Cl)Cl)NC(=O)N[C@H1]1CCC2=C(C(OC)=C(OC)C(OC)=C2)C3=CC=C(C(C=C31)=O)NCC4=CC=CC=C4
667	O=C(C(Cl)Cl)NCC1=CN(N=N1)[C@H1]2CCC3=CC(OC)=C(OC)C(OC)=C3C4=CC=C(C(=O)C=C24)NCCO
668	O=C(OCCC)OCC1=CN(N=N1)[C@H1]2CCC3=CC(OC)=C(OC)C(OC)=C3C4=CC=C(C(=O)C=C24)NCCO
669	O(C=CC=CC1=C2C(OC)=C(OC)C=C1CC[C@H1](NC(N(CCO)CCO)=S)C2=CCCNC)ONCC
670	O=C(OCCC)OCC1=CN(N=N1)[C@H1]2CCC3=CC(OC)=C(OC)C(OC)=C3C4=CC=C(C(=O)C=C42)NCC(=O)C
671	O=C(OCC=C)NCC1=CN(N=N1)[C@H1]2CCC3=CC(OC)=C(OC)C(OC)=C3C4=CC=C(C(=O)C=C24)NCC(=O)C
672	O=C(C(Cl)Cl)NCC1=CN(N=N1)[C@H1]2CCC3=CC(OC)=C(OC)C(OC)=C3C4=CC=C(C(=O)C=C24)NCC(=O)C
673	O=C(C(Cl)Cl)N1C(=O)N[C@H1]2CCC3=C(C(OC)=C(OC)C(OC)=C3)C4=CC=C(C(C=C42)=O)NCC=CC=C1
674	O=COCCC
675	O=C(C(Cl)Cl)NCC1=CN(N=N1)[C@H1]2CCC3=CC(OC)=C(OC)C(=C3C=4C2=CC(C(NC)=CC=4)=O)OCCCl
676	O=C(OCC=C)NCC1=CN(N=N1)[C@H1]2CCC3=CC(OC)=C(OC)C(OC)=C3C4=CC=C(C(C=C24)=O)NCC(=O)C
677	O=C(C)N[C@@H1]1CC(C2=C(C(OC)=C(OC)C=C2CC1)OCC3=CC=CC=C3)=O
678	O=C(C)N[C@@H1]1C=2C(C3=C(C(OC)=C(OC)C=C3CC1)OC(C)=O)C=C(SC)C(C=2)=O
679	O=C(C(Cl)Cl)NC(=O)N[C@H1]1CCC2=CC(OC)=C(OC)C(OC)=C2C3=CC=C(C(C=C31)=O)NCC(=O)O
680	O=C(C(C)C)OCC(C=C1[C@H1](CCC2=CC(OC)=C(OC)C(O)=C2C1=CC=CO)CSCC)=O
681	O=C(O)C1=CN(N=N1)[C@H1]2CCC3=C(C(OC)=C(OC)C(OC)=C3)C4=CC=C(C(C=C42)=O)NC
682	O=C(OCC)C1=CN(N=N1)[C@H1]2CCC3=CC(OC)=C(OC)C(OC)=C3C4=CC=C(C(C=C24)=O)NCC(=O)C
683	O=C(C)N[C@@H1]C1=C2C(C(SC)=CC=C1C3=C(C(OC)=C(OC)C=C3CC2)OC(C4=CC=CC=C4)=O)SC=O
684	O=C(C(C)C)OC=1C(C=C2[C@H1](CCC3=CC(OC)=C(OC)C(OC)=C3C2=CC=1N)C(C)=O)SC=O
685	O=C(C)N[C@@H1]1C=2C(C3=C(C(OC)=C(OC)C=C3CC1)CC=C(SC)C)(C=2)ONC(C)=O
686	O=C(O)CN(CCO)C(=O)N[C@H1]1CCC2=CC(OC)=C(OC)C(OC)=C2C3=CC=C(C(C=C13)=O)NCC
687	O=C(OCC)C=C(C(OCC)=O)N[C@H1]1CCC2=CC(OC)=C(OC)C(OC)=C2C3=CC=C(C(C=C31)S)CC
688	O=C(O)C1=CN(N=N1)[C@H1]2CCC3=C(C(OC)=C(OC)C(OC)=C3)C4=CC=C(C(=O)C=C42)NCC
689	O=C(C(C)C)OCC(C=C1[C@H1](CCC2=CC(OC)=C(OC)C(O)=C2C1=CC=O)C(C)=O)C=O
690	O=C(O)C=C(OC)C(C(NC)=CC=CC1=C(OC)C(OC)=C(OC)C=C1CC[C@@H1](C)NCC)=O
691	O=C(OCC(C)COC1=C)N(N=N1)[C@H1]2CCC3=CC(OC)=C(OC)C(OC)=C3C4=CC=C(C(=O)C=C24)NC
692	O(C=CC=CC1=C(OC)C(OC)=CC=C1CC[C@H1](CC=COC(C2=CC=CC=C2)=O)C(OC)=C)OSC=O
693	O=C(C(C)C)OC=1C(C=C2[C@H1](CCC3=CC(OC)=C(OC)C(OC)=C3C2=CC=1S)C(C)=O)OC
694	CCCCCCCCCCCCCCCC(=O)OCC1=CN(N=N1)[C@H1]2CCC3=CC(OC)=C(OC)C(OC)=C3C4=CC=C(NC)C(=O)C=C24
695	CCCCCCCCCCCCCCCC(=O)OCC1=CN(N=N1)[C@H1]2CCC3=CC(OC)=C(OC)C(OC)=C3C4=CC=C(C(C=C24)=O)NC
696	CCCCCCCCCCCCC=1CCCOCC(C=C2[C@H1](CCC3=CC(OC)=C(OC)C(OC)=C3C2=CC=1N)C(=O)C=O)SC
697	CCCCCCCCCCCCCCCC=1OCC(C=C2[C@H1](CCC3=CC(OC)=C(OC)C(OC)=C3C2=CC=1N)C(=O)C=O)SC
698	CCCCCCCCCCCCCCCC(OCC1=CN(N=N1)[C@H1]C2CC3=CC(OC)=C(OC)C(OC)=C3C4=CC=C(C(=O)C=C24)NC)=O
699	CCCCCCCCCCCCCCCC=1OCCC=C2[C@H1](CCC3=C(C(OC)=C(OC)C(OC)=C3)C2=CC=1)NSC=O
700	CCCCCCCCCCCCCCCC(OCC1=CN(N=N1)[C@H1]2CCC3=CC(OC)=C(OC)C(OC)=C3C4=CC=C(C(C=C24)=O)NC)=O
701	N(C)CNCC1=CN(N=N1)[C@H1]2CCC3=CC(OC)=C(OC)C(OC)=C3C4=CC=C(C(C=C24)=O)NC=O
702	OC(=O)C1=C(C(OCC)=O)N=NN1[C@H1]CCC2=CC(OC)=C(OC)C(OC)=C2C3=CC=C(NC)C(C=C3)=O
703	CC(C)OC(NCC1=CN(N=N1)[C@H1]2CCC3=CC(OC)=C(OC)C(OC)=C3C4=CC=CC(C=C24)=O)NC=O
704	C1=C(OC)C(OC)=C(OC)C=C1CC[C@@H1](C2=CC(C(OC(C3=CC=CC=C3)=O)=CC=C2)N)C=O
705	OC1=C(OC)C(OC)=CC=C1C2=CC=C(NC)CC=C2[C@@H1](NC(C(C)C)=O)NCC
706	C1=C(OC2)C=C(OC)C=C1CC[C@H1](NC(C(OCC)=O)=C(NCO)OOC3=CCC(NC)=CC=C23)OOC
707	OC(=O)C=C(C(OCC)=O)N(NCCC)N[C@H1]1CCC2=CC(OC)=C(OC)C(OC)=C2C3=CC=C(NC)C(=O)C=C31
708	C12=C(OC)C(OC)=C(OC)C=C1CC[C@H1](NC2(C(O)=O)CC=CCC(NC)=C)OSC
709	C12=C(OC)C(OC)=C(OC)C=C1CC[C@H1](NC(C(O)=O)(O)CC3=CC(OC)=C(C=C3C2)N)C=O
710	C1=C(OC)C(=CC=C1C2=C(C(OC)=C(OC)C=C2CC[C@H1](C=CC(C(O)=CC)O)C(C(C)C)=O)S)C
711	OC1=C(OC)C(OC)=CC=C1C2=CC=C(NC)CC=C2[C@@H1](N3C(C(OCC)=O)=C(N=N3)C=O)OC
712	OC(=O)C1=CN(N=N1)[C@H1]2CCC3=CC(OC)=C(OC)C(OC)=C3C4=CC=C(NC)C(C=C42)=O
713	N(C)C(=O)NCCC(OCC1=CN(N=N1)[C@H1]CCC2=CC(OC)=C(OC)C(OC)=C2C3=CC=C(C(=O)C=C3)N)C=O
714	CC(C)(C)OC(=O)/N=C(\NC(=O)OC(C)(C)C)N[C@H1]1CCC2=CC(OC)=C(OC)C(OC)=C2C3=CC=C(NC)C(=O)C=C13
715	CC(C)(C)OC(=O)/N=C(\NC(=O)OC(C)(C)C)N[C@H1]1CCC2=CC(OC)=C(OC)C(OC)=C2C3=CC=C(C(=O)C=C13)NC
716	C=1C(C)(C)OC(=O)/N=C(/N[C@H1]2CCC3=C(C(OC)=C(OC)C(OC)=C3)C4=CC=C(C(C=C42)=O)NC)N=1
717	COC(NCCCOCC1=CN(N=N1)[C@H1]2CCC3=CC(OC)=C(OC)C(=C3C4=CC=C(NC)C(C=C24)=O)OC=O)=O
718	C=1C(C)(C)OC(=O)/N=C(/N[C@H1]2CCC3=C(C(OC)=C(OC)C(OC)=C3)C4=CC=C(NC)C(=O)C=C24)N=1
719	C(=CC=CN(COCC)OCC1)=CN(N=N1)[C@H1]2CCC3=C(C(OC)=C(OC)C(OC)=C3)C4=CC=C(C(C=C24)=O)NC
720	CC(C)(C)OC(=O)/N=C(\NC(=O)OC(C)(C)C)N[C@H1]1CCC2=CC(OC)=C(OC)C(OC)=C2C3=CC=C(C(C=C13)=O)NC
721	C=1C(C)(C)OC(=O)/N=C(/N[C@H1]2CCC3=C(C(OC)=C(OC)C(OC)=C3)C4=CC=C(NC)C(=O)C=C42)N=1
722	C=1C(C)(C)OC(=O)/N=C(/N[C@H1]2CCC3=C(C(OC)=C(OC)C(OC)=C3)C4=CC=C(C(C=C24)=O)NC)N=1
723	C=1C(C)OC(=O)/N=C(/N[C@H1]2CCC3=C(C(OC)=C(OC)C(OC)=C3)C4=CC=C(NC)C(=O)C=C42)N=1
724	C=1NC=2CC=C3[C@H1](CCC4=C(C(OC)=C(OC)C(=C4)OC)C3=CC=2)NC(C(=O)O)C=CN=1
725	O=CC=CC=CC(NCC1=CN(N=N1)[C@H1]CCC2=CC(OC)=C(OC)C(OC)=C2C3=CC=C(C(=O)C=C3)N)C=O
726	O=CC=CC1=CC2=C(SC)CC=C1[C@H1](CC3C=CC(OC)=C(C(=C32)C=O)OCN)NOCNCO
727	O=CC=CC1=C(C=CN1NCOC)CCCOCOC=O
728	O=CC=CC=CC(NCC1=CN(N=N1)[C@H1]2CCC3=CC(OC)=C(OC)C(OC)=C3C4=CC=C(C(C=C24)=O)NC)=O
729	CNCC1C=CC=C(C=C1)NC(=O)N[C@@H1]2C3=CC(C(NC)=CC=C3C4=C(OC)C(OC)=C(C=C4CC2)OC)=O
730	CNCC1(C2=CC=C(C=C2)NC(=O)N[C@H1]C3CC4=CC(OC)=C(OC)C(OC)=C4C=CC=C(NC)C(=O)C=C31)C
731	C1=CN=CC=C1C2=CN(N=N2)[C@H1]3CCC4=C(C(OC)=C(OC)C(OC)=C4)C5=CC=C(C(=O)C=C35)NCO
732	C1=CN=CC=C1C(NCC2=CN(N=N2)[C@H1]3CCC4=CC(OC)=C(OC)C(=C4C5=CC=C(NC)C(=O)C=C35)OC)=O
733	N1=NN1[C@@H1]2C3=CC(C(NC)=CC=C3C4=C(C(OC)=C(OC)C=C4CC2)OC)=O
734	COC=CC1CC[C@H1](NC(=O)NC=C[C@@H1](OC(C=CC=C)=O)C2=CC(OC)=C(OC)C(OC)=C2)C1NC=O
735	O=CC=C1C=CC(NCC2=CN(N=N2)[C@H1]C3CC4=CC(OC)=C(OC)C(OC)=C4C=CC=C(NC)C(=O)C=C31)NC
736	CNC=CC=C1C[C@H1](CCC2=CC(OC)=C(OC)C(=C12)OC)N3C(C(O)=O)=C(N=N3)C(=O)OONC
737	CNC=C1C=C2C[C@H1](CCC3=CC(OC)=C(OC)C(=C23)OCC(=O)OC=C)C1=O
738	COC=CC1C=2C[C@H1]NC(=O)NC3=CC=C(Cl)C=C3C4=CCC(NC)=CC=C4C=2C(OC)=C1OCNC=O
739	CNC=1CC=C2[C@H1](CCC3=C(C(OC)=C(OC)C(OC)=C3)C2=CC=1)NC(C(=O)O)=CC=CNC=O
740	C=NC=CCC1OCCC=C2[C@H1](CCC3=C(C(OC)=C(OC)C(OC)=C3)C2=C1)N=O
741	O=CC=CC1=C(C=CN1NCOC)C=O
742	CNCC1C=C2[C@H1](CCC3=C(C(OC)=C(OC)C(=C3)OC)C2=CC=C1)NCOC(C4=CC=NC=C4)=O
743	COC1=C(OC)C(OC)=CC=2CC[C@@H1](C3=CC(=O)C(NC)=CC=C3C=21)N4C=C(N=N4)COC(=O)C5=CC=NC=C5
744	COC=C(OC)C(OC)=CCCC[C@H1](N1C=C(N=N1)COC(=O)C2=CC=NC=C2)C3=CC(=O)C(=CC=C3CNCN)C
745	C12=CC(C=3C([C@@H1](NCC4=CC=C(C)C=C4CCC1)C2)=CC(=O)C(=CC=3)SC=C)(OC)C(OC)=COC
746	C12=C3C(C4=CC=C(C(=O)C=C4[C@H1](CC3)N5C=C(N=N5)COC(=O)C6=CC=NC=C6)C1)NC=C2OCOCOC
747	C=C1C(C=C(CC[C@@H1]1N2N=NC(=C2)C3=CC=C(Cl)C=C3)C=C(C(OC)=COC)OC)=CC=C(C=O)NC
748	COC1=C(OC)C=CC=2CC[C@@H1](C3=CC(=O)C(NC)=CC=C3C1=2)N4C=C(N=N4)COCC5=CC=CC=C5OC
749	C1=C2C(CC([C@H1](CC2)N3N=NC(=C3)C4(O)CCCCC4)=O)CC(OC)=C(C(=C1)OC)OC
750	C=C1C(C=C(CC[C@@H1]1N2N=NC(=C2)C3=CC=C(Cl)C=C3)C=C(C(=COC)OC)OC)=CC(C(NC)=C)=O
751	C=C1C(C2=C(CC[C@@H1]1N3C=C(N=N3)COCC4=CC=CC=C4)C=C(C(OC)=C2OC)OC)=CC=C(CN)C=O
752	CC(C)COC=1CC=C2[C@H1](CCC3=C(C(OC)=C(OC)C(OC)=C3)C2=CC=1)NSC=O
753	CC(C)C(=O)NCC1=CN(N=N1)[C@H1]2CCC3=CC(OC)=C(OC)C(OC)=C3C4=CC=C(NC)C(=O)C=C24
754	CC(C)C(=O)OCC1=CN(N=N1)[C@H1]2CCC3=CC(OC)=C(OC)C(OC)=C3C4=CC=C(NC)C(=O)C=C24
755	CC(C)(O)C=1N=NN(C=1)[C@H1]2CCC3=C(C(OC)=C(OC)C(OC)=C3)C4=CC=C(C(C=C24)=O)NC
756	CC(C)(O)C=CN([C@H1]1CCC2=CC(OC)=C(OC)C(OC)=C2C3=CC=C(C(C=C13)=O)NC)O
757	CC(C)C=1OCCC=C2[C@H1](CCC3=C(C(OC)=C(OC)C(OC)=C3)C2=CC=1)NSC=O
758	CCCCCCCCCCCCCCCC(OCC1=CN(N=N1)[C@H1]2CCC3=CC(OC)=C(OC)C(OC)=C3C4=CC=C(NC)C(=O)C=C24)=O
759	CCCCCCCCCCCCCCCCOCC1=CN(N=N1)[C@H1]2CCC3=CC(OC)=C(OC)C(OC)=C3C=CC=C(NC)C(=O)C=C2O
760	CCCCCCCCCCCCCCCCOCC1=CN(N=N1)[C@H1]2CCC3=CC(OC)=C(OC)C(OC)=C3C=CC=C(NC)C(=O)C=C2OC
761	C[C@H1](NC(C)=O)C1=CCC(SC)=CC=C1C2=C(C=C(OC)C(OC)=C2OCC3=CC=CC=C3)OSC
762	C1[C@H1](NC(O)=O)C2=CCC=CC=C2C3=C(OC)C(OC)=C(OC)C=C3CC=C1SC=O
763	C=12C(=CC(C(NC)=CC=1)=O)[C@H1](CCC3=CC(OC)=C(OC)C(=C32)OC)C(C)C=O
764	NC(=O)NCC1=CN(N=N1)[C@H1]2CCC3=CC(OC)=C(OC)C(OC)=C3C4=CC=C(NC)C(=O)C=C24
765	N(C(C1=CC=NC=C12)=O)[C@@H1]3CC(C4=C(C(OC)=C(OC)C=C4CC3)OC(CC)=O)=CC=C(SC)C2=O
766	C=12C(=CC(C(NC)=CC=1)=O)[C@H1](CCC3=CC(OC)=C(OC)C(=C3C2)NC(C)C)CSCSC
767	C12[C@H1](NC(O)=O)C3=CCC(SC)=CC=C3C4=C(C(OC)=C(OC)C=C4CC1)OC=CC2=O
768	C1=CC(OC)=CC=C1CN[C@H1]2CCC3=C(C(OC)=C(OC)C(OC)=C3)C=4C2=CC(C(=CC=4)NC)=O
769	C=CC(OC)=C(OC)C(OC)=CC1(C2=CC=C(NC)CC=C2[C@H1](CCC1)NC(=O)C=O)SC
770	N1(CCCC1)C(=O)OC2=C(OC)C(OC3)=CC=C2C4=CC=C(SC)C(C=C4[C@@H1](NC(=O)C)CC3)=O
771	C=CC(=O)OCCC=C1[C@H1](CCC2=C(C(OC)=C(OC)C(OC)=C2)C1=CC)N=O
772	O(C1=CC(=CC(OC)=C1OC)CC[C@H1](NC(N(C(C)C)C(C2)C)=O)C=CCC(NC)=CC=C2ONC)C
773	N(C(C1=CC=NC=C1)=O)[C@@H1]2C=3C(C4=C(C(OC)=C(OC)C=C4CC2)OC)=CC=C(SC)C(=O)C=3
774	N(C(C1=CC=CC=C1)=O)CCN[C@H1]2CCC3=CC(OC)=C(OC)C(OC)=C3C4=CC=C(C(C=C24)=O)SC
775	C1[C@H1](NC(O)=O)C2=CCC=CC=C2C3=C(OC)C(OC)=C(OC)C=C3CCNC=C1O
776	C1=C(C(OC)=C(OC=2)CC3=CC=C(NC)C(C=C3[C@@H1](NC(N(COC)C)O)SCCC=21)NC)OC
777	N1(CCCC1)CN[C@H1]2CCC3=C(C(OC)=C(OC)C(OC)=C3)C4=CC=C(SC)C(=O)C=C24
778	C=[C@H1]COCCCCCCC
779	N1=NC1=C(C(=O)O)NC(=O)N[C@H1]2CCC3=CC(OC)=C(OC)C(OC)=C3C=CC=C(NC)C(=O)C=C2
780	N=CC=C(NCN[C@H1]1CCC2=CC(OC)=C(OC)C(OC)=C2C3=CC=C(C(C=C13)=O)N)C=O
781	N=1N(C=C(CNC(C(C)C)=O)N=1)[C@H1]CCC2=CC(OC)=C(OC)C(OC)=C2C=CC3=CCC=CC=C3NC=O
782	N=CC=C(NCN[C@H1]1CCC2=CC(OC)=C(OC)C(OC)=C2C3=CC=C(NC)C(=O)C=C13)O
783	N=NC1=CN(N=N1)[C@H1]C2CC3=CC(OC)=C(OC)C(OC)=C3C4=CC=C(C(=O)C=C42)NCOC
784	N=NC(=C(C(OCC)=O)N[C@H1]1CCC2=CC(OC)=C(OC)C(OC)=C2C3=CC=C(C(C=C13)=O)N)C
785	CNC=1C(=O)C=C2[C@H1](CCC3=C(C(OC)=C(OC)C(OC)=C3)C2=CC=1)NC(C(=O)O)=CN=CNC
786	CNC=1C(=O)C=C2[C@H1](CCC3=CC(OC)=C(OC)C(OC)=C3C2=CC=1)NC4(C(=O)O)C=CN=N4
787	C=CC1C[C@H1](NC(C2)=O)C=CC=3C(OC)=C2C1=CC=C(SC)C(C=3)=O
788	N1=CC=CC2=C1C(OC=CC(OC=3)=CCCC[C@H1](NC(C)=O)C4=CCC(NC)=CC=C4C=32)=O
789	CNC=1C(=O)C=C2[C@H1](CCC3=C(C(OC)=C(OC)C(OC)=C3)C2=CC=1)NC(C)=O
790	CNC=1C(=O)C=C2[C@H1](CCC3=CC(OC)=C(OC)C(OC)=C3C2=CC=1)NC4(C(=O)O)C=CN=C4NC
791	N1=CC=CC=C1COC=C(C(OC=2)=CCCC[C@H1](NC(C)=O)C3=CC(C(SC)=CC=C3C=2OCO)=O)O
792	C=C1[C@H1](CCC2=C(C(OC)=C(OC)C(OC)=C2)C1=CC=CC(C)=O)NCNC(=O)CSC
793	CN1CC(=O)C=C2C(C3=C(OC)C(OC)=C(OC)C=C3CC[C@@H1]2N4C(C(O)=O)=C(N=N4)OCNC)=CC1
794	NN(C=C(CNC(CCCCCl)=O)N=N)[C@H1]1CCC2=CC(OC)=C(OC)C(OC)=C2C3=CC=C(NC)C(=O)C=C31
795	C=C1[C@H1](C=2CC=CC(OC)=C(OC)C(OC(C3=CC=CC=C3)=O)=CC1=CC=C)C(C=2)=O
796	N=1N(C=C(CNC(C(C)C)=O)N=1)[C@H1]2CCC3=CC(OC)=C(OC)C(OC)=C3C4=CC=C(C(=O)C=C24)NC
797	C1=CN=CC(=C1CC)C=O
798	N1=CC=CC2=C1C(OC=CC(OC=3)=CCCC[C@H1](NC(C)=O)C4=CCC(SC)=CC=C4C=32)C
799	N=NC1=CN(N=N1)[C@H1]2CCC3=CC(OC)=C(OC)C(=C3C4=CC=C(NC)C(C=C42)=O)OC
800	N=NC=C(C(=O)O)NC(=O)N[C@H1]CCC1=CC(OC)=C(OC)C(OC)=C1C2=CC=C(NC)C(=O)C=C2
801	N=1N(C=C(CNC(C(C)C)=O)N=1)[C@H1]CCC2=C3C(OC)=C(OC)C(OC)=C2C=CC=C(CC=CC=C3)CC
802	COC1=CC(=CC(OC)=C1OC)CC[C@H1](NC(N(C(C)C)C(C2)C)=O)C=CC(C(NC)=CC=C2NC=O)NC
803	C=C1[C@H1](CCC2=CC(OC)=C(OC)C(OC)=C2C1=CC=C(C(C)=O)N3C)NC(C(=O)O)=C3NC
804	CNC=1C(=O)C=C2[C@H1](CCC3=CC(OC)=C(OC)C(OC)=C3C2=CC=1)NC(C(=O)O)C=CN=CNC
805	N=NC(=C(C(=O)O)NC(=O)N[C@H1]C1CC2=CC(OC)=C(OC)C(OC)=C2C=CC=C(NC)C(=O)C=C1)CC
806	COC1=CC(=CC(OC)=C1OC)CC[C@H1](NC(N(C(C)C)C(C)C)=O)C2=CC(C(NC)=CC=C2)=O
807	CC(C)(C)OC(=O)NCCC(NCC=1N=NN(C=1)[C@H1]CCC2=CC(OC)=C(OC)C=C2C3=CC=C(NC)C(C=C3)=O)OC=O
808	CC(C)(C)OCNCCC(=O)NCC1=CN(N=N1)[C@H1]C2CC3=CC(OC)=C(OC)C(OC)=C3C4=CC=C(C(=O)C=C24)NC=O
809	COC(=O)C1=C(N=NN(CNCC)OCCCCC(=O)C2=CC(C3=C(OC)C(OC)=C(OC)C=C3CC[C@@H1]2N1)C)O
810	CC(C)(C)OC(=O)NCCC(OCC=1N=NN(C=1)[C@H1]C2CC3=CC(OC)=C(OC)C(OC)=C3C4=CC=C(C(=O)C=C24)NC)=O
811	CC(C)(C)OC(=O)NCCC(OCC=1N=NN(C=1)[C@H1]2CCC3=CC(OC)=C(OC)C(OC)=C3C4=CC=C(C(C=C24)=O)NC)=O
812	CC(C)(C)OCNCCC(=O)NCC1=CN(N=N1)[C@@H1]2C3=CC(C(NC)=CC=C3C=C(CC2)C=C(OC)C(OC)NC)=O
813	CC(C)(C)OC(=O)NCCC(NCC=1N=NN(C=1)[C@H1]C2CC3=CC(OC)=C(OC)C(OC)=C3C4=CC=C(C(=O)C=C24)N)C=O
814	C1[C@H1](NCC)CC2=CC(C(NC)=CC=C2C3=C(C(OC)=C(OC)C=C3CC1)OC(C)=O)CC=O
815	C1(=CN(C(=O)OCC)N[C@@H1]2C=3C(C4=C(OC)C(OC)=C(OC)C=C4CC2)=CC=C(C(=O)C=3)NC)N=C1
816	CC(C)(C)OCNCCC(=O)NCC1=CN(N=N1)[C@@H1]2C3=CC(C(NC)=CC=C3C4=C(CC2)C=C(OC)C(=C4OC)NC)=O
817	C1C(C)(C)OC(=O)NCCC1NCC=2N=NN(C=2)[C@H1]3CCC4=CC(OC)=C(OC)C(OC)=C4C=CC=C(NC)C(=O)C=C3O
818	CC(C)(C)OC(=O)NCCC(OCC=1N=NN(C=1)[C@H1]CCC2=CC(OC)=C(OC)C(=C2C3=CC=C(NC)C(=O)C=C3)O)C=O
819	CC(C)OC(=O)/N=C(/N[C@H1]1CCC2=C(C(OC)=C(OC)C(OC)=C2)C3=CC=C(NC)C(=O)C=C13)N=N
820	C=1N(N=NC=1C(OCC)=O)[C@H1]2CCC3=C(C(OC)=C(OC)C(OC)=C3)C4=CC=C(C(=O)C=C42)NCOCC
821	O=CC=CN=NN[C@H1]1CCC2=C(C(OC)=C(OC)C(=C2)OC)C3=CC=C(NC)C(=O)C=C13
822	N1=NN[C@@H1]2CCC3=C(C(OC)=C(OC)C=C3CC2=CC(OC)=C(OC)COC)CN1
823	O=CC=CC=C(C1=CNNCOC)CC(OC)=C1C=C
824	CNC=CC=C1C[C@H1](CCC2=CC(OC)=C(OC)C(=C12)OC)NC3(C(=O)O)C=CN=N3
825	CNC=CC=C1C([C@H1](CCC2=CC(OC)=C(OC)C(=C12)OC)NC(C(=O)OCC)=C(C(OCO)=O)ONC)SC
826	C=1NC=2CC=C3[C@H1](CCC4=C(C(OC)=C(OC)C(OC)=C4)C3=CC=2)NC(C(=O)O)C=CN=1
827	O=CC=CC=C(C=CNNCOC)C=CC=CC
828	C1=CN=CC=C1C(NCC2=CN(N=N2)[C@H1]3CCC4=CC(OC)=C(OC)C(=C4C5=CC=C(C(C=C53)=O)OC)OO)C
829	N=NN([C@H1]1CCC2=C(C(OC)=C(OC)C(OC)=C2)C3=CC=C(C(=O)C=C13)NC)COC4CC=CC=C4O
830	CNCCC1=CC=C(C=C1)NC(=O)N[C@H1]2CCC3=CC(OC)=C(OC)C(OC)=C3C4=CC=C(C(C=C24)=O)NC=O
831	N=NN([C@H1]1CCC2=C(C(OC)=C(OC)C(OC)=C2)C3=CC=C(C(=O)C=C13)NC)C(=O)OCC
832	N=NN([C@@H1]1C2=CC(C(NC)=CC=C2C3=C(C(OC)=C(OC)C=C3CC1)OC)=O)OCC=C=O
833	COC1=C(OC)C(OC)=CC=2CC[C@@H1](C3=CC(=O)C(NC)=CC=C3C=21)N4C=C(N=N4)CNC(=O)C5=CC=NC=C5
834	C=C1C(C=C(CC[C@@H1]1N2N=NC(=C2)CNC(=O)OCC(C)C)C=C(C(OC)=COC)O)C=CC=C(C=O)NC
835	COC1=C(OC)C(OC)=CC=2CC[C@@H1](C3=CC(=O)C(NC)=CC=C3C1=2)N4C=C(N=N4)CNC(=O)C5=CC=NC=C5
836	C=C1C(C2=C(CC[C@@H1]1N3N=NC(=C3)CNC(=O)OCC(C)C)C=C(C(OC)=C2OC)O)C=CC=C(C=O)NC
837	C=CC(C1C([C@@H1](NCCCCCCCCCCCCCCC)CC(=O)C)(CC)SC=COC)C(OC)=C1OC
838	C1=C2C(CC([C@H1](CC2)N3N=NC(=C3)CNC(=O)C(Cl)Cl)=CC(=O)C(=CC)NC)=C(OC)C(OC)=C1OC
839	CN(N([C@@H1]1C2=CC(=O)C(NC)=CC=C2C3=CC(=C(OC)C=C3CC1)OC)O)CNC(=S)NCCCCC
840	N([C@H1]1CCC2=CC(=C(OC)C(=C2C3=CC=C(C(C=C31)=O)NC)OC4)OC[C@H1])(OC4)NC(=S)O
841	CN(N([C@@H1]1C2=CC(=O)C(NC)=CC=C2C3=CC(=C(OC)C=C3CC1)OC)O)CNC(=S)CCCCCC
842	CN(N([C@@H1]1C2=CC(=O)C(NC)=CC=C2C3=CC(=C(OC)C=C3CC1)OC)O)CNC(=S)N4C[C@@H1](O)[C@@H1]OC4=CC
843	OC=CC=C1C2=C(OC)C(OC)=C(OC)C=C2CC[C@H1](C3=CCC(=CC=C31)NC)ON
844	O=C(OC)NCC1=CN(N=N1)[C@H1]2CCC3=CC(OC)=C(OC)C(OC)=C3C4=CC=C(NC)C(=O)C=C24
845	O1C=CC=CC2=C(OC)C(OC)=C(OC)C=C2CC[C@@H1]1C=CCC(F)F
846	O(C=CC=CC1=C(OC)C(OC)=C(OC)C=C1CC[C@H1](C=C2CC(OCC(C)C)=O)N=C2ON)C
847	O=C(OC)OCC1=CN(N=N1)[C@H1]2CCC3=CC(OC)=C(OC)C(OC)=C3C4=CC=C(NC)C(=O)C=C24
848	O(C=CC=CC1=C(OC)C(OC)=C(OC)C=C1CC[C@H1]C=CCC(OC(=O)OCC)=CC)C
849	O(C=CC=CC1=C(OC)C(OC)=C(OC)C=C1C2C[C@H1](C=CCC(OCC(C)C)=O)N=C2ON)C
850	O=C(CC)OCC1=CN(N=N1)[C@H1]2CCC3=CC(OC)=C(OC)C(OC)=C3C4=CC=C(NC)C(=O)C=C24
851	O=C(OC)CCOC=CC=C1C[C@H1](CCC2=CC(OC)=C(OC)C(OC)=C21)NC=O
852	O(C=CC=CC1=C(OC)C(OC)=C(OC)C=C1CC[C@H1](C=CCCOCC2=CC=CC=C2)OONC)ONCC
853	OC=CC=CC1=C(OC)C(OC)=C(OC)C=C1C2C[C@H1](C=CCC(OCC(C)C)=O)N=C2ONC
854	O=C(OC)C1=CN(N=N1)[C@H1]2CCC3=C(C(OC)=C(OC)C(OC)=C3)C4=CC=C(NC)C(=O)C=C24
855	O=C(OCC=C)N1C(=O)N[C@H1]CCC2=C(C(OC)=C(OC)C(OC)=C2)C3=CC=C(NC)C(C=C13)=O
856	O=C(C(C)C)NC(=S)N[C@@H1]1C=2C(C3=C(C(OC)=C(OC)C=C3CC1)OC)=CC=C(NC)C(=O)C=2
857	O=C(OC(C)(C)C)NCC1=CN(N=N1)[C@H1]2CCC3=CC(OC)=C(OC)C(OC)=C3C=4C2=CC(C(=CC=4)NC)=O
858	O=C(CCCCCl)NCC1=CN(N=N1)[C@H1]2CCC3=CC(OC)=C(OC)C(OC)=C3C4=CC=C(NC)C(=O)C=C24
859	O=C(CCCCCl)NCC1=CN(N=N1)[C@H1]2CCC3=CC(OC)=C(OC)C(OC)=C3C4=CC=C(NC)C(=O)C=C42
860	O=C(OCC)C1=CN(N=N1)[C@H1]2CCC3=C(C(OC)=C(OC)C(OC)=C3)C4=CC=C(NC)C(=O)C=C24
861	O=C(OC(C)(C)C)NCC=1N=NN(C=1)[C@H1]C2CC3=CC(OC)=C(OC)C(OC)=C3C4=CC=C(NC)C(=O)C=C42
862	O=C(OCC)C1=CN(N=N1)[C@H1]2CCC3=CC(OC)=C(OC)C(OC)=C3C4=CC=C(NC)C(C=C24)=O
863	O=C(OCC)NCC1=CN(N=N1)[C@H1]2CCC3=CC(OC)=C(OC)C(OC)=C3C4=CC=C(NC)C(=O)C=C24
864	O=C(C(C)C)NCN[C@H1]1CCC2=CC(OC)=C(OC)C(OC)=C2C3=CC=C(NC)C(=O)C=C13
865	O=C(OCC=C)NCC1=CN(N=N1)[C@H1]2CCC3=CC(OC)=C(OC)C(OC)=C3C4=CC=C(NC)C(=O)C=C24
866	O=C(OCC(C)COCC=1)N=NN(C=1)[C@@H1]2C3=CC(C(NC)=CC=C3C4=C(OC)C(OC)=C(OC)C=C4CC2)=O
867	O=C(OCC)C=1N(N=NC=1C(=O)O2)[C@H1]2NC(=S)N[C@H1]3CCC4=CC(OC)=C(OC)C(OC)=C4C=5C3=CC(C(=CC=5)NC)=O
868	O=C(OCC)CN(CCO)C(=S)N[C@H1]1CCC2=CC(OC)=C(OC)C(OC)=C2C3=CC=C(NC)C(=O)C=C13
869	OC1=C2C3=CC=C(NC)CC=C3[C@H1](CCC2=CC(OC)=C1OC)NC(C(O)=O)=O
870	O=C(OCC(Cl)(Cl)Cl)NCC1=CN(N=N1)[C@H1]2CCC3=CC(OC)=C(OC)C(OC)=C3C=4C2=CC(C(=CC=4)NC)=O
871	CC(O)(OC(=O)CC1)CN(N=N1)[C@H1]2CCC3=CC(OC)=C(OC)C(OC)=C3C4=CC=C(NC)C(=O)C=C24
872	CC(O)(C)C1=CN(N=N1)[C@H1]2CCC3=C(C(OC)=C(OC)C(OC)=C3)C4=CC=C(NC)C(=O)C=C24
873	CC(O)(C)C1=CN(N=N1)[C@H1]2CCC3=C(C(OC)=C(OC)C(OC)=C3)C4=CC=C(C(C=C24)=O)NC
874	C1=2C(O)CN(CC3O)N1[C@H1]CCSC(C4=C(C=C(OC)C(OC)=C4OC(O)CCC3=O)CC=2)C
875	CC(C)COC(NCC1=CN(N=N1)[C@H1]2CCC3=CC(OC)=C(OC)C(OC)=C3C4=CC=C(C(C=C24)=O)NC)=O
876	CC(O)(C)C1=CN(N=N1)[C@H1]2CCC3=C(C(OC)=C(OC)C(OC)=C3)C4=CC=C(C(=O)C=C24)NC
877	CC(C)CNCC1=CN(N=N1)[C@H1]2CCC3=CC(OC)=C(OC)C(OC)=C3C4=CC=C(C(C=C24)=O)NC=O
878	CC(O)(C)CC(=O)OCC1=CN(N=N1)[C@H1]2CCC3=CC(OC)=C(OC)C(OC)=C3C=4C2=CC(C(=CC=4)NC)=O
879	CC(C)COC(NCC1=CN(N=N1)[C@H1]C2CC3=CC(OC)=C(OC)C(OC)=C3C4=CC=C(C(=O)C=C24)NC)=O
880	C=C(NC)CC=C1CC2=C(OC)C(OC)=C(OC)C=C2CC[C@@H1]1N3C(C=CC=C3OC(=O)OC)=O
881	CC(C)(C)OC(NCC1=CN(N=N1)[C@H1]2CCC3=CC(OC)=C(OC)C(OC)=C3C4=CC=C(C(C=C24)=O)NC)=O
882	CC(C)(C)OC(NCC=1N=NN(C=1)[C@H1]2CCC3=CC(OC)=C(OC)C(OC)=C3C4=CC=C(C(C=C24)=O)NC)=O
883	CC(C)(C)OC(=O)NCC1=CN(N=N1)[C@H1]2CCC3=CC(OC)=C(OC)C(OC)=C3C4=CC=C(NC)C(=O)C=C24
884	C=C(OC)C(OC)=C(OC)CCC([C@H1](CCC1=C)NC(C(O)=O)=C(N=N1)CC)=O
885	COCNCC1=CN(N=N1)[C@H1]2CCC3=CC(OC)=C(OC)C(OC)=C3C4=CC=C(NC)C(=O)C=C24
886	CC(C)(C)OC(NCC=1N=NN(C=1)[C@H1]2CCC3=CC(OC)=C(OC)C(OC)=C3C4=CC=C(C(C=C24)=O)N)C=O
887	CC(C)(C)OC(NCC1=CN(N=N1)[C@H1]2CCC3=CC(OC)=C(OC)C(OC)=C3C4=CC=C(NC)C(=O)C=C24)=O
888	C(=CN(C(=O)OCC)N[C@@H1]1CC=2)(C3=C(C(OC)=C(OC)C=C3CC1)OC)CC=C(NC)C(C=2)=O
889	COC(NCC1=CN(N=N1)[C@H1]2CCC3=C(C(OC)=C(OC)C(OC)=C3)C4=CC=C(NC)C(=O)C=C24)=O
890	N(C(C)C)C(NCC1=CN(N=N1)[C@H1]2CCC3=CC(OC)=C(OC)C(OC)=C3C4=CC=C(NC)C(=O)C=C24)=O
891	N(CCCCCCC=O)CC1=CN(N=N1)[C@H1]2CCC3=CC(OC)=C(OC)C(OC)=C3C4=CC=C(NC)C(=O)C=C24
892	N(C(C(C)C)=O)C1=CN(N=N1)[C@H1]2CCC3=C(C(OC)=C(OC)C(OC)=C3)C4=CC=C(NC)C(=O)C=C24
893	OC1=C(C(OC)=CC2=C1C3=CC=C(NC)CC=C3[C@H1](CC2)N4C(C(O)=O)=C(N=N4)OC=O)O
894	C1=[C@H1]COC=CN=N1
895	C[C@H1](COC=CN=NN[C@H1]1CCC2=CC(OC)=C(OC)C(OC)=C2C=3C1=CCC(=CC=3)NC)OCCC
896	N(C)C1=CC=C2C3=C(OC)C(OC)=C(OC)C=C3CC[C@@H1](C2=CC1=O)NC(C(=O)O)CCONCOCNCOC
897	N(CCCCC)CC1C2C=C[C@H1](CCC3=CC(OC)=C(OC)C(OC(C)=O)=C3C2=CC=C1SCSC=O)C
898	O(C1=C(C(OC)=CC2=C1C3=CC=C(NC)CC=C3[C@H1](CC2)N4C(C(O)=O)=C(N=N4)OC=O)O)OCC
899	N(C(C)C)C(NCC1=CN(N=N1)[C@H1]2CCC3=CC(OC)=C(OC)C(OC)=C3C4=CC=C(C(C=C24)=O)NC)=O
900	C1#CC=C(C=C1)F
901	N(CCCCCCC=O)CC1=CN(N=N1)[C@H1]2CCC3=CC(OC)=C(OC)C(OC)=C3C4=CC=C(C(C=C24)=O)NC
902	N(C(C)=O)[C@@H1]1C2=CC(C(SC)=CC=C2C3=C(C(OC)=C(OC)C=C3CC1)OC(C4=CCCC=C4)=O)C
903	N(C)C1=CC=C2C3=C(OC)C(OC)=C(OC)C=C3CC[C@@H1](C2=CC1=O)NC(C(=O)O)CCON=CCF
904	C=[C@H1]COC=CNNN=NCCNC(OC(C)(C)C)=O
905	N(CCCCC)CC1CC2=C[C@H1](CCC3=CC(OC)=C(OC)C(OC(C)=O)=C3C2=CC=C1SCNC=O)C
906	O=C(OCC)C1=C(C(OCC)=O)N=NN1[C@H1]CCC2=CC(OC)=C(OC)C(OC)=C2C3=CC=C(NC)C(C=C3)=O
907	O=C(OC1=CC=CC=C1)NCC2=CN(N=N2)[C@H1]3CCC4=CC(OC)=C(OC)C(OC)=C4C5=CC=C(NC)C(=O)C=C35
908	O=C(C1=CC=CC=C1Cl)NCC2=CN(N=N2)[C@H1]3CCC4=CC(OC)=C(OC)C(OC)=C4C5=CC=C(C(C=C35)=O)NC
909	O=C(OC(C)(C)C)NCC1=CN(N=N1)[C@H1]2CCC3=CC(OC)=C(OC)C(OC)=C3C4=CC=C(NC)C(=O)C=C24
910	O=C(C1=CC=CC=C1Cl)NCC2=CN(N=N2)[C@H1]3CCC4=CC(OC)=C(OC)C(OC)=C4C5=CC=C(NC)C(=O)C=C35
911	N([C@H1]1CCC2=CC(OC)=C(OC)C(OC)=C2C3=CC=C(NC)C(C=C13)=O)C=CCOC(=O)CCCC=O
912	O=C(OCC1=CC2=C(C=C1)F)N[C@@H1]CC(C3=C(C=C(OC)C(OC)=C3OC(OCC)=O)NCCC2)=CC=C(O)C=O
913	O=C(OC(C)(C)C)NCC1=CN(N=N1)[C@H1]2CCC3=CC(OC)=C(OC)C(OC)=C3C4=CC=C(C(=O)C=C24)NC
914	O=C(C1=CC=NC=C1)OCC2=CN(N=N2)[C@H1]3CCC4=CC(OC)=C(OC)C(OC)=C4C5=CC=C(NC)C(=O)C=C35
915	C1OC=CC2=C(C3=CC=C(NC)CC=C3[C@@H1](N)CC2)ONC(OC)=C1OC
916	C12OC=CC=C(C3C(O)CC1=CC=C(OC)C(OC)=C3)C=COC=C2
917	C1=C2CC[C@H1](C3=CCC(SC)=CC=C3C2=C(C(OC)=C1OC)OC=O)N
918	COC1=C2C3=CC=C(NC)C(=O)C=C3[C@H1](CCC2=CC(OC)=C1OC)NCCO
919	C=CCC1[C@H1](CC=[N+1]C2=C1CC(C(OC)=C2OCOC=C)C=CSC)C=O
920	C1OC=CC=C(CC(O)CC1=[N+1]=[N-1])C=O
921	C1OC=C2C3=CC=C(NC)C(=O)C=C3[C@H1](CCC2C=COC)NCCCCC=C1
922	C1OC=C2C3=CC=C(NC)C(=O)C=C3[C@H1](CCC2C=COC)NCCCCC=C1OC
923	C1=C2CC[C@H1](CC(C2=C(OC)C(=C1OC)OC)=CC=C(NC)C=O)CN=[N+1]=[N-1]
924	C=C1C=2C[C@H1](CC(C3=CC(OC)=C(OC)C=C31)C=CC=CSC)C(=O)C=2N
925	C1=C2CC[C@H1](C3=CCC(NC)=CC=C3C2=C(C(OC)=C1OC)OC)ONCCC#N
926	COC1=C2C3=CC=C(SC)C(=O)C=C3[C@H1](CCC2=CC(OC)=C1OC)NCCCCCCCCCC
927	COC1=C2C3=CC=C(NC)C(=O)C=C3[C@H1](CCC2=CC(OC)=C1OC)NCCCCCCCCCC
928	COC=C1C2=C3C=C(NC)C(C=C2[C@@H1](NCCCCCCCCCC)CCC1=CC(=C3OC)O)C=O
929	CC(CC)N[C@H1]1CCC2=CC(OC)=C(OC)C(OC)=C2C3=CC=C(NC)C(=O)C=C31
930	CC(CC)N[C@@H1]1C2=CC(C(NC)=CC=C2C3=C(OC)C(OC)=C(OC)C=C3CC1)=O
931	CC(CC)N[C@H1]C1CC2=CC(OC)=C(OC)C(OC)=C2C3=CC=C(C(C=C31)=O)NCC
932	CC(CC)N[C@H1]C1CC2=CC(OC)=C(OC)C(OC)=C2C3=CC=C(NC)C(=O)C=C31
933	CC(CC)N[C@@H1]1C2=CC(C(NC)=CC=C2C3=C(OC)C(OC)=C(C=C3CC1)OC)=O
934	CC(C)CCN[C@@H1]1C2=CC(C(SC)=CC=C2C3=C(CC1)C=C(OC)C(OC)=C3OC)=O
935	C(CCCCN1[C@H1]CCC2=CC(OC)=C(OC)C(OC)=C2C3=CC=C(SC)CC=C13)=O
936	CCCCCN[C@H1]1CCC2=CC(OC)=C(OC)C(OC)=C2C3=CC=C(SC)C(=O)C=C13
937	CC(CC)N[C@H1]C1CC2=CC(OC)=C(OC)C(OC)=C2C3=CC=C(C(C=C31)=O)NC
938	CC(CC)N[C@H1]1CCC2=CC(OC)=C(OC)C(OC)=C2C3=CC=C(NC)C(=O)C=C13
939	C1(=NC=C(O)C(C)=CC1)C2=C(C(OC)=C(OC)C=C2CC[C@H1](O)C=CN)CSC
940	C1(=CC=C(O)C(CCC)C=O)C2=C(OC)C(OC)=C(OC)C=C2CC[C@H1](NC(=O)C)C1SC
941	COC=C1C2=CC=C(NC)C(=O)C=C2[C@@H1](NCC(C)CCC)CCC1=CC(=COC)OC
942	C1OC=C2C3=CC=C(NC)C(=O)C=C3[C@@H1](NC(=N)N)CCC2=CC(OC)=C1OC
943	C12OC=CC3=C(CC(O)CC1=CC=C4C(OC)=C(OC)C)C43OC=C2
944	COC1=C2C3=CC=C(NC)C(=O)C=C3[C@@H1](NCC(CCC)C)CCC2=CC(OC)=C1OC
945	C1=C2CC[C@H1](C3=CC(C(SC)=CC=C3C2C=C1O)CNC=O)CC
946	COC1=C2C3=CC=C(NC)C(=O)C=C3[C@H1](CCC2=CC(OC)=C1OC)NC(=S)NC
947	COC1=C2C3=CC=C(SC)C(=O)C=C3[C@H1](CCC2=CC(OC)=C1OC)NCCCCC
948	NC1=CC=CC=C1C2=CC3=C(OC)C(=C(OC)C=C3CC[C@H1](NCCC)C2NCOC)O
949	COC=C1C2=CC=C(NC)CC=C2[C@@H1](NCCC#N)CCC1=CC(=COC)OC=O
950	C1=C2CC[C@H1](C3=CCC(SC)=CC=C3C2=C(C(OC)=C1OC)OC=O)NCCC#N
951	C1=C2CC[C@H1](C3=CCC(SC)=CC=C3C2=C(C(OC)=C1OC)OC=O)NCCC
952	COC1=C2C3=CC=C(NC)C(=O)C=C3[C@H1](CCC2=CC(OC)=C1OC)NCC4=CC=NS4
953	COC=C1C2=CC=C(NC)C(=O)C=C2[C@@H1](NCC(C)C)CCC1=CC(OC)=COC
954	COC1=C2C3=CC=C(SC)C(=O)C=C3[C@H1](CCC2=CC(OC)=C1OC)NCCCCl
955	COC1=C2C3=CC=C(NC)C(=O)C=C3[C@H1](CCC2=CC(OC)=C1OC)NCC=CC=NCN
956	COC1=C2CC([C@H1](CCC2=CC(OC)=C1OC)NCCCCl)C(C(=CC)NC)=O
957	C=1NCC(=O)C=C2C=1C3=C(OC)C(OC)=C(C=C3CC[C@@H1]2NCCCCl)C=CC
958	O(C1=C(OC)C(OC)=CC23C([C@@H1](NC(N)=S)CCC2=C1)=CC(C(NC)=CC3)=O)NCC
959	O(C1=C(OC)C=2C3=CC=C(SC)CC=C3[C@H1](CCC=2C=C1OC)NC(C)CC=C)OC
960	N(C)C(=O)N[C@H1]1CCC2=CC(OC)=C(OC)C(OC)=C2C3=CC=C(NC)C(C=C31)=O
961	C1=C(OC)C(OC)=C(OC)CC2=CC=C(SC)C(C=C2[C@@H1](NC(N(C)C)=O)CCC1)=O
962	C12=C(OC)C(OC)=C(OC)C=C1CC[C@H1](NC(C3)=O)C(C(NC)=CC=C32)=O
963	N(CCCC)C(CN1[C@@H1]C2=CCC(O)=CC=C2C3=C(CC1)C=C(OC)C(OC)=C3OC)=O
964	N(C)C(=S)N[C@H1]1CCC2=C(C(OC)=C(OC)C(OC)=C2)C3=CC=C(NC)C(C=C31)=O
965	C1[C@H1](OCCC2)CC=C(C(OC)=C(OC)C=C2CC1N3C=CC=C(NC)CC3)ONC(C)=O
966	N(C)C=1C(=O)C=C2[C@H1](CCC3=CC(OC)=C(OC)C(OC)=C3C2=CC=1N)C(C)CCSCSC
967	O(C1=C(OC)C=2C3=CC=C(SC)C(C=C3[C@H1](CCC=2C=C1OC)NC(C)CC=C)=O)C
968	C12=C(OC)C(=C(OC)C=C1CC[C@H1](NCC(O)=O)C3=CCC(NC)=CC=C32)OOC
969	N(C(C)=O)[C@@H1]C1=CC(C(NC)=CC=C1C2=C(OC)C(OC)=C(OC)C=C2CCNC=O)C
970	C1[C@H1](NCC)CC2=CC(C(NC)=CC=C2C3=C(OC)C(OC)=C(OC)C=C3C1N)C(=O)C
971	C1=C(OC)C(OC)=C(OC=2)CC3=CC=C(SC)C(C=C3[C@@H1](NC(N(C)C)=O)CCC=21)=O
972	N(C)C(=S)N[C@H1]1CCC2=CC(OC)=C(OC)C(OC)=C2C3=CC=C(NC)C(=O)C=C31
973	N(C)C=1C(=O)C=C2[C@H1](CCC3=CC(OC)=C(OC)C(OC)=C3C2=CC=1N)C(C)CCSC
974	N(C)C=1C(=O)C=C2[C@H1](CCC3=CC(OC)=C(OC)C(OC)=C3C2=CC=1N)C(C)CCNC
975	C1[C@H1](NCC)CC2=CC(C(NC)=CC=C2C3=C(OC)C(OC)=C(OC)C=C3C1N)C=O
976	C1=C2CC[C@H1](C3=CCC(SC)=CC=C3C2=C(C(OC)=C1OC=4)OC=O)NCC=CC=4
977	COC1=CC2=CC=C(SC)C(=O)C=C2[C@@H1](NCC3=CC=CC=C3)CCC1=CC(OC)=COC
978	COC1=C2C3=CC=C(NC)C(=O)C=C3[C@H1](CCC2=CC(OC)=C1OC)NCC4=CC=CS4
979	N1=NN([C@@H1]C2=CC(C(O)=CC=C2C3=C(CC)C=C(OC)C(OC)=C3OC)=O)CC(O)=C1F
980	N1=NN([C@@H1]C2=C3C(C(C)=CC=C3C4=C(CC2)C=C(OC)C(OC)=C4OC)=O)N=CC=N1
981	CNC=1C(C=C2[C@H1](CCC3=C(C(OC)=C(OC)C(OC)=C3)C2=CC=1)NC(C)=O)SC=O
982	CNC=1C(C=C2[C@H1](CCC3=C(C(OC)=C(OC)C(OC)=C3)C2=CC=1)NC(C)C)=O
983	N1=NC=CN=C2C1(C3=C[C@H1](CCC=C2C(OC)=C(OC)C(OC)=C3N)C(C)C=C)OF
984	O=CC=C1N=NN(C1)[C@@H1]2C3=CC(C(NC)=CC=C3C4=C(OC)C(OC)=C(C=C4CC2)OC)NC
985	N1=NN([C@@H1]C2=CC(C(O)=CC=C2C3=C(CC)C=C(OC)C(OC)=C3OC)=O)CC=C1F
986	N1=NN([C@@H1]C2=CC(C(O)=CC=C2C3=C(CC)C=C(OC)C(OC)=C3OC)=O)CC=C1
987	O=CC1=CN=NN1[C@H1]2CCC3=C(C(OC)=C(OC)C(OC)=C3)C4=CC=C(C(C=C42)N)COC
988	C1=CN=CC=C1CN[C@H1]2CCC3=CC(OC)=C(OC)C(OC)=C3C4=CC=C(C(C=C24)=O)NCC
989	CSC=1C(C=C2[C@H1](CCC3=C(C(OC)=C(OC)C(OC)=C3)C2=CC=1)NC(C)=O)NC=O
990	C1NC=CC=C2C([C@@H1](NC(C(C)C)=O)CCC3=CC(OC)=C(OC)C(OC)=C23)C1=O
991	O=CC1=CN=NN1[C@H1]2CCC3=CC(OC)=C(OC)C(OC)=C3C4=CC=C(C(C=C42)=O)NC
992	N1=NC=CN(N=N1)[C@H1]2CCC3=CC(OC)=C(OC)C(OC)=C3C4=CC=C(NC)C(=O)C=C24
993	N1=NC=CN(NC1)C=CC=C2C3=C(OC)C(OC)=C(OC)C=C3CC[C@@H1](C2=C)NC=CC=C
994	OCCN(CC=C)C(=S)N[C@H1]1CCC2=CC(OC)=C(OC)C(OC)=C2C3=CC=C(NC)C(=O)C=C13
995	OCCN(CC=C)C(=O)N[C@@H1]1C2=CC(C(NC)=CC=C2C3=C(OC)C(OC)=C(OC)C=C3CC1)=O
996	OCCN(CC=C)C(=O)N[C@H1]1CCC2=CC(OC)=C(OC)C(OC)=C2C3=CC=C(NC)C(=O)C=C31
997	NC1=NN=NN1[C@@H1]2C=3C(C4=C(C(OC)=C(OC)C=C4CC2)OC)=CC=C(NC)C(C=3)=O
998	O=C1C2=C[C@H1](CCC=C3C(OC)=C(OC)C(OC(C)=O)=C3C2=CC=C1NC(C)=O)NC
999	N1=NC(=CN(N=N1)[C@H1]2CCC3=CC(OC)=C(OC)C(OC)=C3C4=CC=C(C(C=C42)=O)N)C
1000	OCCN(CC=C)C(=O)N[C@H1]1CCC2=CC(OC)=C(OC)C(OC)=C2C3=CC=C(NC)C(=O)C=C13
1001	C=CN=C1C(C)NC(=O)OC=CC=C2C3=C(OC)C(OC)=C(OC)C=C3CC[C@@H1](C2=C1)NCCC
1002	O=C1C=C2[C@H1]CCC3=CC(OC)=C(OC)C(OC)=C3C2=CC=C1SCNC(C)=O
1003	N1=NC(=CN(N=N1)[C@H1]2CCC3=CC(OC)=C(OC)C(OC)=C3C4=CC=C(C(C=C24)=O)N)C
1004	C12=CC(C(NC)=CC=C1C3=C(C=C(OC)C(OC)=C3OC)CC[C@@H1]2NCCC(F)(F)F)=CO
1005	CNC(N(C)C)CN[C@H1]1CCC2=CC(OC)=C(C(OC)=C2C=3C1=CC(=O)C(=CC=3)NC)OC
1006	C1=C2C([C@H1](CCC3=CC(OC)=C(C(=C32)OC)OC)NCCCCl)C(C(=C1)NC)=O
1007	C1=C2C(C3=C(OC)C(=C(C=C3CC4[C@@H1]2NCC4CCC)OC)OC)=CC=C(NC)C1=O
1008	COC=C(OC)C(OC)=CCC=1C[C@H1](NCC(C)C)CC(C=1)=CC=C(C(=O)C)SC
1009	COC1=C(OC)C(OC)=CC=2CC[C@@H1](C3=CC(C(=CC=C3C=21)NC)=O)NCC=4SC=CC=4
1010	CNC(N(C)C)CN[C@H1]1CCC2=CC(OC)=C(C(OC)=C2C=3C1=CC(=O)C(NC)=CC=3)OC
1011	C12=CC(C(NC)=CC=C1C3=C(C=C(OC)C(OC)=C3OC)CC[C@@H1]2NCCC(F)(F)F)=O
1012	N1C(NC)=CC=C2C([C@H1](CCC3=CC(OC)=C(C(OC)=C23)OC)NCCC(C)C)=CC1=O
1013	C12=CCC(NC)=CC=C1C3=C(C=C(OC)C(OC)=C3OC)CC[C@@H1]2NCC=4SC=CC=4O
1014	N([C@H1]1CCC2=C(C3=CC=C(NC)C(C=C13)=O)C(=C(OC)C(=C2)OC)OC)CCC
1015	C12=CC(C(NC)=CC=C1C3=C(OC)C(=C(C=C3CC[C@@H1]2N4C=C(CO)N=N4)O)CO)C=O
1016	COC1=C(OC)C(OC)=CC=2CC[C@@H1](C3=CC(C(=CC=C3C1=2)NC)=O)NCC4=CC=CC=C4
1017	COC1=C(OC)C(OC)=CCCC[C@H1](NCC2=CC=CS2)C3=CC(=O)C(NC)=CC=C3C1
1018	C12=CC(C(SC)=CC=C1C3=C(CC[C@@H1]2NCC4=CC=CC=C4)C=C(OC)C(OC)=C3OC)=O
1019	C=1=C2C([C@H1](CCC3=CC(OC)=C(C(OC)=C23)OC)NCC=CC=O)C(=CC=1)SC
1020	COC1=C(OC)C(OC)=CC=2CC[C@H1](NCC3=CC=CS3)C4=CC(=O)C(NC)=CC=C4C1=2
1021	COC1=C(OC)C(OC)=CC=2CC[C@@H1](C3=CC(C(NC)=CC=C3C=21)=O)NCC4=CC=CC=C4
1022	C1[C@@H1](C2=CC(C(NC)=CC=C2C3=C(C=C(C(=C3OC)OC)OC)C1)=O)NCC4=CC=CS4
1023	COC=C(OC)C(OC)=CCCC=1[C@H1](NCC(C)C)C2=CC(=O)C(SC)=CC=C2C=1
1024	C1=C2C(C3=C(OC)C(=C(C=C3CC[C@@H1]2NCC4=CC=CS4)O)CO)C=CC=C(NC)C1=O
1025	COC1=C(OC)C(OC)=CC=2CC[C@@H1](C3=CC(C(=CC=C3C1=2)NC)=O)N4C=C(CCl)N=N4
1026	COC1=C(OC)C(OC)=CCCC=2[C@H1](NCC(C)C)C3=CC(=O)C(SC)=CC=C3C1=2
1027	C1=CC(C(=CC=C1C2=C(OC)C(OC)=C(C=C2CC[C@@H1]NCCOO)C)OC)(CC)O
1028	N[C@H1]1CCC2=CC(OC)=C(OC)C(OC)=C2C3=CC=C(C(=O)C=C31)SCC
1029	NC(N(CC)OC)N[C@H1]1CCC2=CC(OC)=C(OC)C(OC)=C2C=3C1=CC(=O)C(NC)=CC=3F
1030	O=CC(SC)=CC=C1C([C@H1](CCC2=CC(OC)=C(OC)C(OC)=C12)N)=CCNC
1031	O=C1C(SC)=CC=C2C([C@H1](CCC3=CC(OC)=C(OC)C(OC)=C23)NCC)C=C1
1032	N1C(C2NC=CC=C2CC(C3=C(OC)COC)=C(OC)C=C3CC)[C@@H1]C=CC1=O
1033	C12=CC=C(NC)C(C=C1[C@@H1](NC(C)=O)CCC3=CC(OC)=C(OC)C(OC)=C23)SC=O
1034	N[C@H1]1CCC2=CC(OC)=C(OC)C(OC)=C2C3=CC=C(SC)C(=O)C=C31
1035	OC(OC1=C2C3=CC=C(SC)C(C=C3[C@H1]CCC2=CC(=C1OC)O)CNC(C)=O)=O
1036	O1C(OC2=C3C4=CC=C(SC)C(C=C4[C@H1]CCC3=CCOC)=C2OCNC=CC=C1)C
1037	C12=CC=C(NC)C(C=C1[C@@H1](NC(C)=O)CCC3=CC(OC)=C(OC)C(OC)=C23)=O
1038	C12=CC=C(NC)C(C=C1[C@@H1](NC(N)=O)CCC=CC(OC)=C(OC)C(OC)=C2)O
1039	NC(=O)N[C@@H1]1C2=CC(C(NC)=CC=C2C3=C(OC)C(OC)=C(C=C3CC1)OC)=O
1040	NC(CCN[C@H1]1CCC2=CC(OC)=C(OC)C(OC)=C2C=3C1=CC(=O)C=CC=3)NCF
1041	O=C1C(NC)=CC=C2C3=C(OC)C(OC)=C(C=C3CC[C@@H1](C2=C1)NCC)OOCSC
1042	NC(=O)N[C@@H1]C1=CC(C(NC)=CC=C1C2=C(OC)C(OC)=C(OC)C=C2CC)=O
1043	C1[C@H1](C2=CC(C(SC)=CC=C2C3=C(OC)C(OC)=C(C=C3C1)O)C)ONC
1044	C12=CC=C(NC)C2(C=C1[C@@H1](NC(C)=O)CCC3=CC(OC)=C(OC)C(OC)=C3)SC
1045	N1C(C(CCC)=C)N1[C@H1]2CCC3=CC(OC)=C(OC)C(OC)=C3C4=CC=C(C(=O)C=C24)NC
1046	C1=C2C=C(NC)C(C=C1[C@H1]CCC3=CC(OC)=C(OC)C(OC)=C23)NC(N)=O
1047	C1=C2C=C(NC)C(C=C1[C@H1]CCC3=C2C(OC)=C(OC)C(OC)=C3)NC(C)=O
1048	NC(=O)N[C@@H1]1C2=CC(C(NC)=CC=C2C3=C(C(OC)=C(OC)C=C3CC1)OC)=O
1049	C1=2[C@H1](CCC3=CC(OC)=C(OC)C(OC)=C3C1=CC=C(NC)C(=O)C=2NC)C=O
1050	C1=C2C3=C(OC)C(OC)=C(OC)C=C3CC[C@H1](N)C2=CC(C(=C1)SC)=O
1051	C1[C@@H1](C2=CC(C(NC)=CC=C2C3=C(OC)C(OC)=C(OC)C=C3C1=O)N)C(=O)C
1052	COCC(C)=CC1=CC([C@@H1](NC(C)=O)CCC2=CC(OC)=C(OC)C(OC)=C21)=CSC
1053	C1[C@H1](C2=CCC(SC)=CC=C2C3=C(OC)C(OC)=C(OC)C=C3C1)ONCC
1054	C=C1C2=C(OC)C(OC)=C(OC)C=C2CC[C@H1](NC(C)=O)C1=CC=C(NC)C(=O)CNC
1055	C=1C2=CC(=CC(C=1OC)=O)[C@H1](CCC3=CC(OC)=C(OC)C(OC)=C32)NC(C)=O
1056	CC[C@H1]C1=CC(C(NC)=CC=C1C=C(C=CC(OC)=COCOC)OON)C
1057	NC(N=C1C=CC2)=CC=C1C3=C(OC)C(OC)=C(OC)C=C3CC[C@@H1]2NC(N)=O
1058	N1=CCC(OC(C2)=O)C=C(NC)CC=C2[C@H1]CCCC=C1ONN=O
1059	C=CC1=C(NC)C(OC)=C(OC)C=C1CC[C@H1](NC(C)=O)C2=CC(C(=CC=C2)NC)=O
1060	C1=2[C@H1](CCC3=CC(OC)=C(OC)C(OC)=C3C1=CC=C(C(C=2)=O)SCN)C(=O)C
1061	C[C@H1](CCC1=CC(OC)=C(OC)C(OC)=C1C2=CC=C(C(C=C2)N)C=O)NCC
1062	C=1=C2C3=C(OC)C(OC)=C(OC)C=C3CC[C@H1](NC(N)=O)C2=CC=C(SC)C(=O)C=1NC
1063	C[C@@H1](C1CC2=CC(OC)=C(OC)C(OC)=C2C3=CC=C(C(C=C31)=O)SCN)C(=O)C
1064	C1=2[C@H1](CC(C3=CC(OC)=C(OC)C=C31)C=CC=C(NC)CC=2)OSC
1065	C12=CC3=C(OC)C(OC)=C(OC)C=C3CC[C@H1](NC(N)=O)C=C1C=C(OC)C(=C2)OO
1066	CC(C)CN[C@H1]1CCC2=C(C(OC)=C(OC)C(OC)=C2)C3=CC=C(SC)C(C=C13)=O
1067	CC(C)NC(=O)N[C@@H1]1C2=CC(C(NC)=CC=C2C3=C(OC)C(OC)=C(C=C3CC1)OC)=O
1068	CC(C)NC(=O)N[C@@H1]1C2=CC(C(NC)=CC=C2C3=C(OC)C(OC)=C(OC)C=C3CC1)=O
1069	C=C(C)C=C1C(C(OC(C)=O)=CC=CC2=C(OC)C(OC)=C(OC)C=C2CC[C@@H1]1N=O)C
1070	CC(C)CN[C@H1]1CCC2=C(C(OC)=C(OC)C(OC)=C2)C3=CC=C(SC)C(=O)C=C31
1071	CC(N)(CCO)[C@H1]1CCC2=CC(OC)=C(OC)C(OC)=C2C3=CC=C(NC)C(=O)C=C31
1072	CC(C)NC(=O)N[C@@H1]C1=CC(C(NC)=CC=C1C2=C(OC)C(OC)=C(OC)C=C2CC)=O
1073	CC(C)NC(=O)N1[C@@H1]C2=CC(C(NC)=CC=C2C3=C(OC)C(OC)=C(OC)C=C3CC1)=O
1074	CC(N)(CCO)[C@H1]1CCC2=CC(OC)=C(OC)C(OC)=C2C3=CC=C(C(C=C31)=O)NCC
1075	CC(N)(CCO)[C@H1]1CCC2=CC(OC)=C(OC)C(OC)=C2C3=CC=C(C(=O)C=C31)NCC
1076	CC(C)CN[C@H1]1CCC2=C(C(OC)=C(OC)C(OC)=C2)C3=CC=C(SC)C(=O)C=C13
1077	CC(C)NC(=O)N[C@@H1]1C2=CC(C(NC)=CC=C2C3=C(C(OC)=C(OC)C=C3CC1)OC)=O
1078	C=C1[C@@H1](NC(C)=O)CCC2=CC(OC)=C(OC)C(OC)=C2C1=CC=C(NC)C=O
1079	C12[C@H1](NC(C)=O)C3=CC(C(SC)=CC=C3C4=C(OC)C(OC)=C(C=C4C1)OC=C2)NC=O
1080	N(NCCCCCl)[C@H1]1CCC2=CC(OC)=C(OC)C(OC)=C2C3=CC=C(NC)C(=O)C=C31
1081	N(C1=CC=C(C=C1)C)CN[C@H1]2CCC3=CC(OC)=C(OC)C(OC)=C3C=4C2=CC(C(NC)=CC=4)=O
1082	C12[C@H1](NC(C)=O)C3=CC(C(NC)=CC=C3C4=C(OC)C(OC)=C(OC)C=C4C1=C2)NC=O
1083	C1[C@H1](NC(C)=O)C2=CC(C(NC)=CC=C2C3=C(OC)C(OC)=C(C=C3C1)OCNC)=O
1084	N1(C(=O)OC2=CC=CC3=C(OC)C(OC)=C(OC)C=C3CC[C@H1](NC(C)=O)C2=CC1)SC
1085	C1[C@H1](NC(N)=O)C2=CC(C(NC)=CC=C2C3=C(C(OC)=C(OC)C=C3CC1)OC)NC=O
1086	N(C1=CC=C(C=C1)C)CN[C@H1]2CCC3=CC(OC)=C(OC)C(OC)=C3C=4C2=CC(C(=CC=4)SC)=O
1087	N(C1=CC=C(C=C1)Cl)C=CN(OC(CC)=O)[C@H1]CCC2=CC(OC)=C(OC)C(OC)=C2C=CC=C(C)CNC=O
1088	C12=C(CC=C3[C@H1](CCC4=CC(OC)=C(OC)C(OC)=C4C3=C1)NCC)OC2=O
1089	C1[C@H1](NC(C)=O)C2=CC(C(SC)=CC=C2C3=C(OC)C(OC)=C(C=C3C1)OCNC)=O
1090	NC(=O)N[C@H1]1CCC2=CC(OC)=C(OC)C(OC)=C2C3=CC=C(NC)C(C=C13)=O
1091	C1#CC(C=C2[C@H1](CCC3=CC(OC)=C(OC)C(OC)=C3C2=C1N)C(C)=O)=C
1092	C=C(CN[C@H1]1CCC2=CC(OC)=C(OC)C(OC)=C2C3=CC=C(NC)C(C=C31)=O)C=O
1093	C1#CC(C=C2[C@H1](CCC3=CC(OC)=C(OC)C(OC)=C3C2=C1)NC(C)=O)=C
1094	C=C1[C@@H1](NC(N)=O)CCC2=CC(OC)=C(OC)C(OC)=C2C1=CC=C(NC)C=O
1095	CCN(CC)C(=O)N[C@H1]1CCC2=CC(OC)=C(OC)C(OC)=C2C3=CC=C(NC)C(=O)C=C31
1096	CCN(CC)C(=O)N[C@H1]C1CC2=CC(OC)=C(OC)C(OC)=C2C3=CC=C(C(C=C31)=O)NC
1097	C=1C=C(NC)CC=C2C=1C3=C(OC)C(OC)=C(OC)C=C3CC[C@@H1]2NC(C)=O
1098	C1[C@H1](NC(C)=O)C2=CCC(SC)=CC=C2C3=C(OC)C(OC)=C(C=C3C1)OCNC(=O)C
1099	C=1C=C(NC)C(C=C2C=1C3=C(OC)C(OC)=C(OC)C=C3CC[C@@H1]2NC(C)=O)=O
1100	C=1C=C(NC)C(C=C2[C@H1](CCC3=CC(OC)=C(OC)C(OC)=C3C=12)CC=O)NSC=O
1101	C=12C=C(NC=3)CC4=CC=1CC=C2[C@H1](CCC=3C=C(OC)C(OC)=C4O)CNC=O
1102	C1=CC(=CC=C1CCCN[C@H1]2CCC3)CC(OC)=C(OC)C(OC)=C3C4=CC=C(SC)C(C=C42)=O
1103	N1([C@@H1]2C3=CC(C(SC)=CC=C3C4=C(OC)C(OC)=C(C=C4CC2)OC=CC=C1)O)CS
1104	CCN(CC)C(=O)N1[C@H1]CCC2=CC(OC)=C(OC)C(OC)=C2C3=CC=C(NC)C(C=C31)=O
1105	C1=CC(=CC=C1CCN[C@H1]2CCC3=C)C(OC)=C(OC)C(OC)=C3C4=CC=C(SC)C(C=C42)=O
1106	C1=CC(=CC=N1)CN[C@H1]2CCC3=CC(OC)=C(OC)C(OC)=C3C4=CC=C(NC)C(C=C42)=O
1107	C1=CC(=CC=C1O)CN[C@H1]2CCC3=CC(OC)=C(OC)C(OC)=C3C4=CC=C(SC)C(C=C42)=O
1108	CCN(CC)C(=O)N[C@H1]1CCC2=CC(OC)=C(OC)C(OC)=C2C3=CC=C(C(C=C31)=O)NCC
1109	C1=CC(=CC=N1)CN[C@H1]2CCC3=CC(OC)=C(OC)C(OC)=C3C4=CC=C(SC)C(C=C42)=O
1110	CCN[C@@H1]1C2=CC(C(NC)=CC=C2C3=C(OC)C(OC)=C(OC)C=C3CC1=O)=O
1111	CC(C)COC1=C(OC)C(OC)=CC=2CC[C@H1](NC(=O)C)C3=CC(C(SC)=CC=C3C1=2)=O
1112	CC(C)N(C(C)C)C(=O)N[C@@H1]1C2=CC(C(NC)=CC=C2C3=C(C(OC)=C(OC)C=C3CC1)OC)=O
1113	CC(C)N(C(C)C)C(=O)N[C@@H1]C1=CC(C(NC)=CC=C1C2=C(OC)C(OC)=C(OC)C=C2CC)=O
1114	CC(C)NC(N[C@H1]1CCC2=CC(OC)=C(OC)C(=C2C3=CC=C(NC)C(C=C31)=O)OC=O)C
1115	C=C(C)CN(CCO)C(=S)N[C@H1]1CCC2=C(C(OC)=C(OC)C(OC)=C2)C3=CC=C(NC)C(C=C31)=O
1116	CC(C)C(OC=C(C(OC)=CC=1CC[C@H1](NC(=O)C)C2=CC(C(SC)=CC=C2C=1)S)C=O)=O
1117	C=C(O)C(OC)=CC(=C)CN[C@H1]1CCC2=CC(OC)=C(OC)C(OC)=C2C3=CC=C(SC)C(C=C31)=O
1118	CC(C)C(OC=C(C(OC)=CCCC[C@H1](NC(=O)C)C1=CC(C(SC)=CC=C1C)=O)C)=O
1119	CC(CO1)(C(C)CO[C@H1]CCC2=C)C(OC)=C(OC)C(OC(=O)C)=C2C3=CC=C(NC)C(C=C31)=O
1120	O=C(N[C@@H1]1C2=CCC(NC)=CC=C2C3=C(CC1)C=C(OC)C(OC)=C3OC)OCC=C
1121	N([C@H1]1CCC2=CC(OC)=C(OC)C(OC)=C2C3=CC=C(NC)C(=O)C=C31)=C(Cl)C=C
1122	O=C(N[C@H1]1CCC2=CC(OC)=C(OC)C(OC)=C2C3=CC=C(C(C=C31)=O)NCN)C4=CC=CC=C4
1123	N([C@H1]1CCC2=CC(OC)=C(OC)C(OC)=C2C3=CC=C(NC)C(C=C13)=O)C(C)C
1124	O=C(N[C@@H1]1C2=CC(C(NC)=CC=C2C3=C(CC1)C=C(OC)C(OC)=C3OC)=O)N=N
1125	O=C(N[C@H1]1CCC2=CC(OC)=C(OC)C(OC)=C2C3=CC=C(NC)C(C=C13)=O)N4CCOCC4
1126	O=C(N[C@H1]1CCC2=CC(OC)=C(OC)C(OC)=C2C3=CC=C(NC)C(=O)C=C13)N4CCOCC4
1127	O=C(N[C@H1]1CCC2=CC(OC)=C(OC)C(OC)=C2C3=CC=C(NC)C(=O)C=C31)N(S)CC
1128	N([C@H1]1CCC2=CC(OC)=C(OC)C(OC)=C2C3=CC=C(NC)C(C=C13)=O)=CC=C
1129	O=C(N[C@H1]1CCC2=CC(OC)=C(OC)C(OC)=C2C3=CC=C(NC)C(=O)C=C31)N4CCOCC4
1130	O=C(N[C@@H1]1C2=CCC(NC)=CC=C2C3=C(CC1)C=C(OC)C(OC)=C3OC)ON=N
1131	O=C(N[C@H1]1CCC2=CC(OC)=C(OC)C(OC)=C2C3=CC=C(NC)C(=O)C=C13)CCOCC
1132	N([C@H1]1CCC2=CC(OC)=C(OC)C(OC)=C2C3=CC=C(NC)C(C=C13)=O)CNC(=O)OCCONC
1133	O=C(N[C@H1]1CCC2=C3C(OC)=C(OC)C(OC)=C2C4=CC=C(NC)C(C=C14)=O)CCOC3
1134	O=C(N[C@H1]1CCC2=CC(OC)=C(OC)C(OC)=C2C3=CC=C(NC)C(=O)C=C31)CCOC(=O)O
1135	CNC=1C(C=C2[C@H1](CCC3=CC(OC)=C(C(OC)=C3C2=CC=1)OC)NC(=O)N4CCOCC4)=O
1136	COC1=C2C3=CC=C(NC)C(=O)C=C3[C@H1](CCC2=CC(OC)=C1OC)NC(=O)NC4=CC=CC=C4
1137	COC=CC1=CC=C(NC)C(=O)C=C1[C@@H1](NC(=S)NC2=CC=CC=C2)Cl
1138	COC1=CC2=CC=C(NC)C(=O)C=C2[C@@H1](NC(=O)NC3=CC=C(F)C=C3)CCC=CC(OC)=C1OC
1139	C=C1CC[C@@H1](C2=CCC(OC(C3=CC=CC=C3)=O)=CC=C2C=C1C=COC)C(OC)=COC=O
1140	C1=CCC[C@H1](NC(=S)NC2=CC=C(C=C2)C(F)(F)F)CC(C1)=CC=C(NC)C(=O)COCOC
1141	COC1=CC2=CC=C(NC)C(C=C2[C@@H1](NC(=O)NC3=CC=CC=C3)CCC1=CC(=COC)O)C=O
1142	COC1=C2C3=CC=C(NC)C(=O)C=C3[C@H1](CCC2=CC(OC)=C1OC)NC(=O)N(CCCCCl)O
1143	C1=C2CC[C@@H1](C3=CCC(SC)=CC=C3C2=C(OC)C(=C1OC)OC=O)NCC4=C(C=CC=C4)O
1144	COC1=CC2=C3C=C(NC)C(=O)C=C2[C@@H1](NC(=S)N(CCO)CCCCC)C3=CC(OC)=C1OC
1145	COC=CC1=C(C2=CC=C(SC)CC=C2[C@H1](CC1)NC(=O)NC3=CC=C(F)C)C3=O
1146	COC1=C2C3=CC=C(NC)C(=O)C=C3[C@@H1](NC(=O)NC4=CC=C(F)C=C4)CCC2=CC(OC)=C1OC
1147	C1=C2CC[C@@H1](C3=CCC(SC)=CC=C3C2=C(OC)C(=C1OC)OC=O)NC(=O)NC4=CC=CC=C4
1148	C=C1C2C[C@H1](N3C=C(COC(=O)C4=CC=CC=C4Cl)N=N3)C5=CC(C(NC)=CC=C5C2=CC1O)C=O
1149	N=1C(=CN(N=1)[C@H1]2CCC3=CC(OC)=C(OC)C(OC)=C3C4=CC=C(NC)C(=O)C=C42)C=O
1150	C=CC1=C(C2=C(OC)C(OC)=C1OC(OCC)=O)CC[C@H1](NC(C)=O)C3=CC(C(SC)=CC=C23)=O
1151	O=CC(=CC1=CC[C@H1](CCC2=CC(OC)=C(OC)C(OC(=O)C)=C21)CC=O)OSC
1152	C1[C@@H1](C2=CC(C(SC)=CC=C2C3=C(OC)C(OC)=C(C=C3CC)OCNCC)=O)C1NC=O
1153	C[C@@H1](C1=CCC(OC(OC)=O)=CC=C1C2=C(OC)C(OC)=C(OC)C=C2CN)C(C)=O
1154	OCC(C(C1)=O)N(N=N1)[C@H1]2CCC3=CC(OC)=C(OC)C(OC)=C3C4=CC=C(NC)C(=O)C=C24
1155	CNCC(O)(C)C1=CN(N=N1)[C@H1]2CCC3=CC(OC)=C(OC)C(OC)=C3C4=CC=C(C(=O)C=C24)NC
1156	O1C=C(NC)CC=C1CN[C@H1]2CCC3=CC(OC)=C(OC)C(OC)=C3C4=CC=C(SC)C(C=C24)=O
1157	C[C@H1](CCC1=C(C(OC)=C(OC)C(OC)=C1)C2=CC=C(C(C=C2)N)C=O)CC=O
1158	N1=CC=C(C=C1)CN[C@H1]2CCC3=C(C(OC)=C(OC)C(OC)=C3)C4=CC=C(NC)C(=O)C=C42
1159	C[C@H1](CCC1=C(C(OC)=C(OC)C(OC)=C1)C2=CC=C(SC)C(=O)C=C2)CC=O
1160	OC1=C(C=CC=C1)CN[C@H1]2CCC3=C(C(OC)=C(OC)C(OC)=C3)C4=CC=C(SC)C(=O)C=C42
1161	N=1C(=CN(N=1)[C@H1]2CCC3=CC(OC)=C(OC)C(OC)=C3C4=CC=C(NC)C(C=C24)=O)C=O
1162	N=1C=CN(N=1)[C@H1]2CCC3=CC(OC)=C(OC)C(OC)=C3C4=CC=C(NC)C(=O)C=C42
1163	C=CC=C(C(=O)OC=CC1=CC([C@@H1](NC(C)=O)CCC2=CC(OC)=C(OC)C(OC)=C21)SC=C)C
1164	N1([C@H1]2CCC3=C(C(OC)=C(OC)C(OC)=C3)C4=CC=C(NC)C(C=C24)=O)C=C1OCC
1165	N1([C@H1]2CCC3=C(C(OC)=C(OC)C(OC)=C3)C4=CC=C(NC)C(C=C24)=O)C(Cl)=C1
1166	NC(C(O)=O)[C@@H1](O)[C@@H1](O)C
1167	N1([C@H1]2CCC3=C(C(OC)=C(OC)C(OC)=C3)C4=CC=C(NC)C(C=C42)=O)C=C1Cl
1168	N1([C@H1]2CCC3=C(C(OC)=C(OC)C(OC)=C3)C4=CC=C(NC)C(C=C42)=O)C(Cl)=C1
1169	O=CC1=CN(N=N1)[C@H1]2CCC3=CC(OC)=C(OC)C(OC)=C3C4=CC=C(NC)C(=O)C=C24
1170	N1([C@H1]2CCC3=C(C(OC)=C(OC)C(OC)=C3)C4=CC=C(NC)C(C=C24)=O)C=C1I
1171	C1N([C@H1]2CCC3=CC(OC)=C(OC)C(OC)=C3C4=CC=C(NC)C(=O)C=C24)CC(OC)=C1
1172	N1([C@H1]2CCC3=C(C(OC)=C(OC)C(OC)=C3)C4=CC=C(NC)C(C=C24)=O)C(O)=C1C
1173	N1([C@H1]2CCC3=C(C(OC)=C(OC)C(OC)=C3)C4=CC=C(NC)C(C=C24)=O)C(O)=C1
1174	O=CC1=CN(N=N1)[C@H1]2CCC3=CC(OC)=C(OC)C(OC)=C3C4=CC=C(NC)C(=O)C=C42
1175	C1N([C@H1]2CCC3=CC(OC)=C(OC)C(OC)=C3C4=CC=C(C(C=C42)=O)NCC=C)C(OC)=C1OC
1176	N([C@H1]1CCC2=C(C(OC)=C(OC)C(OC)=C2)C3=CC=C(NC)C(C=C13)=O)NC=CC=CCl
1177	N1([C@H1]2CCC3=C(C(OC)=C(OC)C(OC)=C3)C4=CC=C(NC)C(C=C42)=O)C=C1I
1178	N(CCCC)CC1=CN(N=N1)[C@H1]2CCC3=C(C(OC)=C(OC)C(OC)=C3)C4=CC=C(NC)C(=O)C=C24
1179	C1=C(O)C(OC)=CC(CN[C@H1]2CCC3=C(C(OC)=C(OC)C(OC)=C3)C4=CC=C(SC)C(=O)C=C42)=C1C
1180	N(C(C)C)(C(C)C)C(=O)N[C@@H1]1CC(C2=C(C(OC)=C(OC)C=C2CC1)OC)(CC)OCC=C(NC)C(C)=O
1181	N(C)C[C@H1](C1=CC(C(NC)=CC=C1C2=C(OC)C(OC)=C(C=C2CC)OCNCC)=O)C=C
1182	C1=C(OC)C(=C(OC)C=C1CC[C@H1](N2C(C(OCC)=O)=C(N=N2)C(OCC)=O)CCC(NC)=CC=C)ONCOC
1183	C1=2[C@H1](OC1)CCCC=C(C3=C(OC)C(OC)=C(OC)C=C3CC=CC=CNC)C(C=2)=O
1184	N(C(C)C)(C(C)C)C(=O)N1[C@H1]CCC2=C(C(OC)=C(OC)C(OC)=C2)C3=CC=C(NC)C(C=C31)=O
1185	N(CCCC)CC1=CN(N=N1)[C@H1]2CCC3=C(C(OC)=C(OC)C(OC)=C3)C4=CC=C(NC)C(C=C24)=O
1186	C1=C(OC)C(=C(OC)C=C1CC[C@H1](NC(C(O)=O)C(=O)OCC=CC(OC)=C(OC)C=C)OCNC)O
1187	C12=C(NC)CC([C@@H1](C3N=NCO3)C=C1OC=CCC2SC)=O
1188	C1=C(OC)C(=C(OC)C=C1CC[C@H1](NC(C(OCC)=O)=C(NCO)OOC2=CCC(NC)=CC=C2)ON)C
1189	N(CCCC)CC1=CN(N=N1)[C@H1]2CCC3=C(C(OC)=C(OC)C(OC)=C3)C4=CC=C(NC)C(=O)C=C42
1190	N(C)C=1C(=O)C=C2[C@H1](CCC3=C(C(OC)=C(OC)C(OC)=C3)C2=CC=1)NC(C)=O
1191	O(C=C(OC)CC1=CC=C(NC)C(C=C1[C@@H1](NC(C(C)C)=O)CONC(C)=O)C)C
1192	N1(CCCC)CC2=CN(N=N2)[C@H1]3CCC4=CC(OC)=C(OC)C(OC)=C4C5=CC=C(C(C=C53)=O)NCC=C1
1193	N(C)C(=O)NCCC(OCC(C=C1[C@H1](CCC2=CC(OC)=C(OC)C(OC)=C2C1=CCN)C(C)=O)S)C=O
1194	C1=C(OC2)C(=CC=C1C3=CC(OC)=C(OC)C=C3CC4[C@H1](CCC=CC=C4COC(C)=O)C2OCOCC)ONC
1195	C1[C@H1](C2=CCC(SC)=CC=C2C3=C(OC)C(OC)=C(C=C3C1)OC)ONC
1196	NC(=N)N[C@@H1]1C2=CC(C(NC)=CC=C2C3=C(CC1)C=C(OC)C(OC)=C3OC)=O
1197	C12=CC=C(NC)C(C=C1[C@@H1](NC(N)=S)CCC3=CC(OC)=C(OC)C(OC)=C23)=O
1198	NC(=S)N[C@@H1]1C2=CC(C(NC)=CC=C2C3=C(OC)C(OC)=C(OC)C=C3CC1)=O
1199	C12=CC=C(NC)C(C=C1[C@@H1](NC(=O)N)CCC3=CC(OC)=C(OC)C(OC)=C32)=O
1200	C[C@H1](CCC1=CC(OC)=C(OC)C(OC)=C1C2=CC=C(C(C=C2)=O)SCN)CC
1201	NC(=S)N1[C@@H1]C2=CC(C(NC)=CC=C2C3=C(OC)C(OC)=C(OC)C=C3CC1)=O
1202	NC(=O)N[C@@H1]C1=C2C(C(NC)=CC=C1C3=C(OC)C(OC)=C(OC)C=C3CC2)=O
1203	C12=CC=C(NC)C(C=C1[C@@H1](NCC)CCCC=CC(OC)=C(OC)C(OC)=C2)SC=O
1204	C12=CC=C(NC)C(C=C1[C@@H1](NC(N)=S)CCC3=CC(OC)=C(OC)C(OC)=C32)=O
1205	N=NC(CO)C(OCC)=O
1206	C[C@H1](CCC1=CC(OC)=C(OC)C(OC)=C1C2=CC=C(C(=O)C=C2)SCN)CC
1207	C[C@H1](CCC1=CC(OC)=C(OC)C(OC)=C1C2=CC=C(C(=O)C=C2)SCN)C(=O)C
1208	OCC(C)=O
1209	C1[C@@H1](C2=CC(C(NC)=CC=C2C3=C(OC)C(OC)=C(C=C3C1)O)C)ONCC
1210	N=CC(C(OC(OCC)=O)=CC=CC1=C(OC)C(OC)=COC)C=C1CC[C@H1](NCCC)C=O
1211	C[C@H1](CCC1=CC(OC)=C(OC)C(OC)=C1C2=CC=C(C(C=C2)=O)SCN)CCC
1212	COCC(C)=C(C(OC)=CCCC[C@H1](NCC)C1=CC(C(SC)=CC=C1)=O)OC
1213	C=CC(N[C@H1]C1CC2=C(C(OC)=C(OC)C(OC)=C2)C3=CC=C(NC)C(=O)C=C31)OO
1214	COC1C(C)=C(C=2C3=CC=C(SC)CC=C3[C@H1]CCC=2C=C1)NCNCCOOOC
1215	C1[C@@H1](C2=CC(C(NC)=CC=C2C3=C(OC)C(OC)=C(C=C3C1)OC=O)N)CCO
1216	CC1=C2C(=C(OC)C(OC)=C1C3=CC=C(NC)C(C=C3[C@H1](C2)NC)C)OONC
1217	COC1=C(OC)C=2C3=CC=C(SC)CC=C3[C@H1](CCC=2C=C1OC)NCC4=CC=CC=C4O
1218	C[C@H1](CCC1=CC(OC)=C(OC)C(OC)=C1C2=CC=C(C(=O)C=C2)NCN)CCO
1219	NC(=O)N1[C@@H1]C2=CC(C(NC)=CC=C2C3=C(OC)C(OC)=C(OC)C=C3CC1)=O
1220	NN(CCO)[C@@H1]1C2=CC(C(NC)=CC=C2C3=C(OC)C(OC)=C(C=C3CC1)OC)=O
1221	C1=2[C@H1](CCC3=CC(OC)=C(OC)C(OC)=C3C1=CC=C(NC)C(=O)C=2NC)CO
1222	C1C2=CC(OC)=C(OC)C(OC)=C2C3=CC=C(NC)C(=O)C=C3[C@H1](C1)NCC4=CC=CS4
1223	C12=CC(C=CC=C1C3=C(OC)C(OC)=C(OC)C=C3CC[C@@H1]2NCC=CC=CC=C)SCC
1224	N=C1C(C(OC(C)=O)CCC2=C(OC)C(OC)=C(OC)C=C2CC[C@H1]1)N=O
1225	NC1(N=CC=C1S)[C@H1]2CCC3=CC(OC)=C(OC)C(OC)=C3C4=CC=C(C(C=C24)N)C=O
1226	CNC(=S)N[C@@H1]1C2=CC(C(NC)=CC=C2C3=C(OC)C(OC)=C(OC)C=C3CC1)=O
1227	NC(N=NCOCCC)C[C@H1]1C2=CC(C(NC)=CC=C2C3=C(CC1)C=C(OC)C(OC)=C3OC)=O
1228	CCCCNC(=S)N[C@H1]1CCC2=CC(OC)=C(OC)C(OC)=C2C3=CC=C(NC)C(=O)C=C31
1229	CCCCNC(=S)N[C@H1]1CCC2=CC(OC)=C(OC)C(OC)=C2C3=CC=C(NC)C(=O)C=C13
1230	CCCCNC(=S)N[C@H1]1CCC2=CC(OC)=C(OC)C(OC)=C2C3=CC=C(NC)C(C=C13)=O
1231	CCCCNC(=S)N[C@H1]1CCC2=CC(OC)=C(OC)C(OC)=C2C3=CC=C(C(C=C31)=O)NC
1232	CCCCCC=1N2[C@@H1]CC(C3=C(C(OC)=C(OC)C=C3C2=C)C=C)(SC)C(C=1)=O
1233	C1C2(C3=C(OC)C(OC)=C(OC)C=C3CC[C@@H1]1NC(N)C)C=CC=C(C(C2)=O)NC
1234	C1C2(C3=C(OC)C(OC)=C(OC)C=C3CC[C@@H1]1NC(N)=NC)C=C(C(=O)C2)NC
1235	C1=2C(C3=C(OC)C(OC)=C(OC)C=C3CC[C@@H1]1NC(C)CC)=CC=C(NC)C(=O)C=2NC
1236	C1=C(C(C=C2[C@H1](CCC3=CC(OC)=C(OC)C(OC)=C3C2=C1)NC(C)C)C)OSC
1237	C12=C(C=CN(NC1)OC3=CC=C(NC)CC=C3[C@@H1](NC(C)=O)CC)CC(OC)=C2OC=O
1238	C1=C(CN[C@H1]2CCC3=CC(OC)=C(OC)C(OC)=C3C4=CC=C(NC)C(=O)C=C42)C=NC=C1
1239	NC(=O)N[C@@H1]1C2=CC(C(NC)=CC=C2C3=C(OC)C(OC)=C(OC)C=C3CC1)=O
1240	C1=CN=NN1[C@H1]2CCC3=CC(OC)=C(OC)C(OC)=C3C4=CC=C(NC)C(=O)C=C24
1241	C1=CN=NN1[C@H1]2CCC3=CC(OC)=C(OC)C(OC)=C3C4=CC=C(C(C=C42)=O)NC
1242	N(C1=CC=C(C=C1)Cl)C=CN(OC=CC=CC=C)C=CC(N2C)=C(C(OC)=CC=CC=CC2C)[C@H1]SOC
1243	C1[C@H1](NC(N=2)=N)CC(C3=C(C(OC)=C(OC)C=C3C1)OC)=CC=C(NC)C(C=2)=O
1244	C1[C@H1](NC(N)=S)C2=CC(C(NC)=CC=C2C3=C(OC)C(OC)=C(OC)C=C3C1)=O
1245	C1=C(C(C=C2[C@H1](CCC3=CC(OC)=C(OC)C(OC)=C3C2=C1)NC(C)C)=O)NC
1246	N(C1=CC=C(C=C1)Cl)C=CN(OC=CC=CC=C)C=CC(N2C)=C(C(OC)=CC=CC=CC2C)[C@H1]NOC=O
1247	NC(=O)N[C@@H1]1C2=CC(C(NC)=CC=C2C3=C(CC1)C=C(OC)C(OC)=C3OC)=O
1248	C1=C2[C@@H1](NC(N)=S)CCC3=CC(OC)=C(OC)C(OC)=C3C2=CC=C(NC)C1=O
1249	C12=C[C@@H1](NC(N(C)C)=O)CCC3=CC(OC)=C(OC)C(OC)=C3C1=CC=C(NC)C2=O
1250	C1=C(CN[C@H1]2CCC3=CC(OC)=C(OC)C(OC)=C3C4=CC=C(NC)C(=O)C=C42)C=NC=CC1
1251	C1=CC(=CC=N1)CN[C@@H1]2C3=CC(C(NC)=CC=C3C4=C(CC2)C=C(OC)C(OC)=C4OC)=O
1252	N(N=NC(CNC(=O)OC)=C)C=C(CC1=CC=C(NC)CC=C1[C@@H1](C)CCOC)COCNC=O
1253	C=1C=C(NC)C(C=C2C=1C3=C(OC)C(OC)=C(OC)C=C3CC[C@@H1]2NC(N(C)C)=O)SNC
1254	C1CN[C@@H1]2C3=CC(C(NC)=CC=C3C4=C(C(OC)=C(OC)C=C4CC2)OC=O)C=C1
1255	CCN(CC)C(=S)N[C@H1]1CCC2=CC(OC)=C(OC)C(OC)=C2C3=CC=C(NC)C(=O)C=C31
1256	N=1[C@@H1]2C3=CCC(SC)=CC=C3C4=C(OC)C(OC)=C(C=C4CC2)OC=CC=1C
1257	C1[C@H1](NC(NC2=CC=C(C=C2)F)=O)C3=CC(C(NC)=CC=C3C4=C(OC)C(OC)=CC=C4OCC1)=O
1258	CCN(CC)C(=S)N[C@H1]1CCC2=CC(OC)=C(OC)C(OC)=C2C3=CC=C(NC)C(C=C31)=O
1259	C=1C=C(NC)C(C=C2C=1C3=C(OC)C(OC)=C(OC)C=C3CC[C@@H1]2NC(C(C)C)=O)SNC=O
1260	CCN(CC)C(=S)N[C@H1]1CCC2=CC(OC)=C(OC)C(OC)=C2C3=CC=C(NC)C(C=C13)=O
1261	CCN(CC)C(=S)N[C@@H1]1C2=CC(C(NC)=CC=C2C3=C(OC)C(OC)=C(OC)C=C3CC1)=O
1262	C=12C=C(NC)C(C=C3C=1C4=C(OC)C(OC)=C(OC)C=C4CC[C@@H1]3NC(NCCCC=O)N)=C2O
1263	C=1C=C(NC)C(C=C2[C@H1](CCC3=CC(OC)=C(OC)C(OC)=C3C2=1)CCC=O)C
1264	C=12C=C(NC)C2(C=C3C=1C4=C(OC)C(OC)=C(OC)C=C4CC[C@@H1]3NC(N(CC)CC)=O)NC
1265	C=12C[C@H1](CCC(=O)C=1)C=C(C(OC)=CC2=CCS)C(C)=O
1266	C1=CC(=CC=N1)CCN[C@@H1]2C3=CC(C(SC)=CC=C3C4=C(CC2)C=C(OC)C(OC)=C4OC)=O
1267	C=CC=C(NC(=O)C=CC=C1C2=C(OC)C(OC)=C(OC)C=C2CC[C@H1](NC(C)=O)C1=C)SC=O
1268	C1=CC=C(NC(=O)N[C@H1]2CCC3=CC(OC)=C(OC)C(OC)=C3C=4C2=CC(C(NC)=CC=4)=O)C1
1269	N=NC(CNC(=O)OC)=C=C(CCO[C@H1]CCC1=CC(OC)=C(OC)C(OC)=C1C2=CC=CNC)C(=O)C=C2
1270	C1=2[C@H1]CCC3=CC(OC)=C(OC)C(OC)=C3C1=CC=C(C(=O)C=2)NCNC(C)=O
1271	CC=C1C2=C(C=C(OC)C(OC)=C2OC(CC)=O)C[C@H1](NC(C)=O)C=CC(C(SC)=CC=C1)=O
1272	C1=2[C@H1]CCC3=CC(OC)=C(OC)C(OC)=C3C1=CC=C(C(C=2)=O)NCNC(C)=O
1273	C1[C@@H1](CC(C2=C(C(OC)=C(OC)C=C2C1)OC)=CC=C(SC)C(C)=O)NC(C)=O
1274	COCC(CN[C@@H1]1C=2C(C3=C(C(OC)=C(OC)C=C3CC1)OC)=CC=C(NC)C(C=2)=O)F
1275	CC1[C@H1](NC(=O)NC2=CC=C(C(F)(F)F)C=C2C3=CCC(NC)=CC=C3C=C(OC)C(OC)=C(C=C1)OO)C
1276	C12C=CC3=C(C=C(OC)C(OC)=C3OC(C)=O)[C@H1](NC(C)=O)C1=CC(C(SC)=C2)=O
1277	CC=CC1=C(C=C(OC)C(OC)=C1OC(OCC)=O)CC[C@H1](NC(C)=O)C2=CC(C(SC)=CC=C2)=O
1278	C=CC=C(NC1CCC=CN=C(CC)CC=C1[C@H1]CCC2=CC(OC)=C(OC)C(OC)=C2)ONC
1279	NCC1=CN(N=N1)[C@@H1]2C3=CC(C(NC)=CC=C3C4=C(C(OC)=C(OC)C=C4CC2)OC)=O
1280	C=CC=C(NC(=O)N[C@H1]1CCC2=CC(OC)=C(OC)C(OC)=C2C3=CC=C(NC)C(C=C13)=O)C
1281	C1=2[C@H1](CCC3=CC(OC)=C(OC)C(OC)=C3C1=CC=C(C(=O)C=2)SCNC(C)=O)C=C
1282	C=CC=C(NC([C@@H1]C1=CCC(SC)=CC=C1C2=C(OC)C(OC)=C(OC)C=C2CC)=O)NC=O
1283	C=CC=C(NC([C@@H1]C1=CCC(SC)=CC=C1C2=C(OC)C(OC)=C(OC)C=C2CC)=O)N=O
1284	O=C1C=C2[C@H1](CCC3=C(C(OC)=C(OC)C(OC)=C3)C2=CC=C1SC)NC(N(C(C)C)C(Cl)=O)NC
1285	O=C1C=C2[C@H1](CCC3=C(C(OC)=C(OC)C(OC)=C3)C2=CC=C1SC)NC(C(=O)OCC)=CNC
1286	N=NC(CNC(=O)OC)=C=C(C=CC=CNCC=CC1)C(OC)C(OC)=C(OC)C=C1CC[C@H1](NC(=O)C)C=CC
1287	C1=C2CC[C@H1](NC(N(C)C)=O)C3=CC(C(NC)=CC=C3C2=C(OC)C(OC)=C1OC)NC(C)=O
1288	O=C1C=C2[C@H1](CCC3=C(C(OC)=C(OC)C(OC)=C3)C2=CC=C1SC)NC(C(C)C)=O
1289	OCCN(CCO)C(=S)N[C@@H1]1C2=CC(C(NC)=CC=C2C3=C(OC)C(OC)=C(OC)C=C3CC1)=O
1290	N1=NC(COC(=O)C2=CC=NC=C2)=CN1NCC=CC3C4=CC=C(NC)CC=C4[C@H1]CCC3=CCNCOCC
1291	N=NC(CNC(=O)OC)=C=CC=CC=CN[C@@H1]C=CC
1292	N1C=NN=NN1[C@H1]2CCC3=C(C(OC)=C(OC)C(OC)=C3)C4=CC=C(C(C=C42)=O)NCCC
1293	O=C1C=C2[C@H1](CCC3=C(C(OC)=C(OC)C(OC)=C3)C2=CC=C1SC)NC(C)=O
1294	CNCC(OC1=2)=C(OC)C=3CC([C@H1](CCC=3C=C1OC)NC(N(C)C)=O)OC(=CC=2)NC=O
1295	CNC=1C(=O)C=C2[C@H1](CCC3=CC(OC)=C(OC)C(OC)=C3C2=CC=1N)C(C(C)C)=O
1296	N=NC(CNC(=O)OC)=C=C(C=CC=CNCC=C1C)C2(NC)C(C(O)=CC2[C@H1]NC(C)=O)CCC1SCOCC
1297	N=NC(CNC(=O)OC)=C=C(C=CC=CNCC=CC12)C(NC)C(OC)=C(OC)C=C1CC[C@H1](NC(=O)C)C2=CC
1298	N1=NC(COC(=O)C2=CC=NC=C2)=CN1[C@@H1]3C4=CC(C(NC)=CC=C4C5=C(OC)C(OC)=C(OC)C=C5CC3)=O
1299	C1NCC(OC)=C(OC)CCC([C@@H1](NCC(O)=O)CCCC=C1O)C=CC(C(SC)=CC)=O
1300	N([C@H1]1CCC2=C(C(OC)=C(OC)C(OC)=C2)C3=CC=C(NC)C(C=C31)=O)CCCC
1301	O=CC(NC)=CC=C1C([C@H1](CCC2=CC(OC)=C(OC)C(OC)=C21)N=[N+1])=[N-1]
1302	N([C@H1]1CCC2=C(C(OC)=C(OC)C(OC)=C2)C3=CC=C(SC)C(C=C31)=O)CCCC
1303	N([C@H1]1CCC2=CC(OC)=C(OC)C(OC)=C2C3=CC=C(NC)C(C=C31)=O)CCCCF
1304	NC(C(OCC)=C)N[C@H1]1CCC2=CC(OC)=C(OC)C(OC)=C2C3=CC=C(NC)C(C=C13)=O
1305	N([C@H1]1CCC2=CC(OC)=C(OC)C(OC)=C2C3=CC=C(NC)C(C=C13)=O)=N
1306	N([C@H1]1CCC2=C(C(OC)=C(OC)C(OC)=C2)C3=CC=C(NC)C(C=C31)=O)CCC
1307	C[C@H1](CCC1=CC(OC)=C(OC)C(OC)=C1C2=CC=C(C(C=C2)=O)SC)NC/C=C/C3=CC=CC=C3
1308	O=CC(NC)=C1C2=CC([C@@H1](N=[N+1]=[N-1])CCC3=CC(OC)=C(OC)C(OC)=C32)NC=CC1
1309	NC(C(OCC)=C)N[C@H1]1CCC2=CC(OC)=C(OC)C(OC)=C2C3=CC=C(NC)C(=O)C=C13
1310	N([C@H1]1CCC2=C(C(OC)=C(OC)C(OC)=C2)C3=CC=C(SC)C(C=C31)=O)CCCO
1311	O=CC(NC)=CC=CC1([C@H1](CCC2=CC(OC)=C(OC)C(OC)=C21)N=[N+1]=[N-1])O
1312	C1NC(CNC(=O)OCCN=N1)CC2=CC(OC)=C(OC)C(OC)=C2C3=CC=C(NC)C(=O)C=C3
1313	O=CC(NC)=CC=C1C([C@H1](CCC2=CC(OC)=C(OC)C(OC)=C21)N)=[N+1]=[N-1]
1314	N([C@H1]1CCC2=C(C(OC)=C(OC)C(OC)=C2)C3=CC=C(NC)C(C=C13)=O)CCC#N
1315	C=CC=C(C(=O)OCC1=CN(N=N1)[C@H1]2CCC3=CC(OC)=C(OC)C(OC)=C3C4=CC=C(NC)CC=C24)O
1316	N=1C=CN(N=1)[C@H1]2CCC3=CC(OC)=C(OC)C(OC)=C3C4=CC=C(NC)C(C=C24)=O
1317	C=CC1=C(C(=O)OC=CC=C2C3=C(OC)C(OC)=C(OC)C=C3CC[C@H1](NC(C)=O)C2=C1SC)C
1318	C=C1C2=C(C=C(OC)C(OC)=C2OC(OCC)=O)CC[C@H1](NC(C)=O)C3=CC(C(NC)=CC=C13)=O
1319	C=CC=CC(=O)OC1=C(C(OC)=CCCC[C@H1](NC(C)=O)C2=CC(C(SC)=CC=C21)=O)C
1320	N1=CC=C(C=C1)CN[C@@H1]2C=3C(C4=C(C(OC)=C(OC)C=C4CC2)OC)=CC=C(NC)C(C=3)=O
1321	OCC(C1(C)OCN)=NN(C1)[C@H1]2C3=CC(C(NC)=CC=C3C4=C(CC2)C=C(OC)C(OC)=C4OC)=O
1322	C1=CC=C(C(Cl)=C1)CN[C@H1]2CCC3=CC(OC)=C(OC)C(OC)=C3C4=CC=C(NC)C(=O)C=C42
1323	C12[C@@H1](CC(C3=C2C(OC)=C(OC)C=C3C1)OC=CC=C(NC)CC)ONC(C)=O
1324	N=1C=CN(N=1)[C@H1]2CCC3=CC(OC)=C(OC)C(OC)=C3C4=CC=C(NC)C(=O)C=C24
1325	OCC(C1(C)OCN)=NN(C1)[C@H1]2C3=CC(C(NC)=CC=C3C4=C(OC)C(OC)=C(C=C4CC2)OC)=O
1326	C1=2[C@H1](CCC3=C(C(OC)=C(OC)C(OC)=C3)C1=CC=C(C(C=2)=O)SCNCC)OC=C
1327	CC=CC(N[C@H1]1CCC2=C(C(OC)=C(OC)C(OC)=C2)C3=CC=C(SC)C(C=C13)=O)CCOC
1328	OC(=O)NCC1=CN(N=N1)[C@@H1]2C=3C(C4=C(C(OC)=C(OC)C=C4CC2)OC)=CC=C(NC)C(C=3)=O
1329	C12=C(OC)C(=C(OC)C=C1CC[C@H1](NC(C(=O)OCC)=C(COCC)OCCC(NC)=CC=CON)C=C2)NC
1330	O(C=C(OC=1)CC2=CC=C(NC)CC=C2[C@@H1](N3C(C(O)=O)=C(N=N3)C(O)=O)CCC=1C=COC=O)C
1331	C12=C(OC)C(=C(OC)C=C1CC[C@H1](NC(C(=O)OCC)=C(COCC)OCCC(NC)=CC=CON)C=C2N)C
1332	N(C)C=1C(=O)C=C2[C@H1](CCC3=C(C(OC)=C(OC)C(OC)=C3)C2=CC=1)NC(C(=O)O)=C(COCC)C=O
1333	N(C)C=1C(=O)C=C2[C@H1](CCC3=C(C(OC)=C(OC)C(OC)=C3)C2=CC=1)N4C(C(=O)O)C=CN=C4NC
1334	C1=C(OC)C(=C(OC)C=C1CC[C@H1](NC(C(=O)OCC)=C(COCC)OCCC(NC)=CC=CON)C=C)NC
1335	N(C)C=1C(=O)C=C2[C@H1](CCC3=C(C(OC)=C(OC)C(OC)=C3)C2=CC=1)N4C(C(=O)O)=C(N=N4)C(=O)NNC
1336	N1(C)C=2C(=O)C=C3[C@H1](CCC4=C(C(OC)=C(OC)C(OC)=C4)C3=CC=2)NC(C(=O)O5)C=CN=C5C=C1NC
1337	C1[C@H1](NCC)CC2=CC(C(SC)=CC=C2C3=C(C(OC)=C(OC)C=C3CC1)OC(C)=O)CC=O
1338	C12=C(OC)C=C(OC)CCC([C@H1](CCC1=C2)NC(C(=O)O)C=CN=CC)=O
1339	C12[C@H1](NCC)CC3=CC(C(SC)=CC=C3C4=C(C(OC)=C(OC)C=C4CC1)OC=C2NCC)=O
1340	C=C(NC)C1C([C@H1](CCC2=CC(OC)=C(OC)C(OC)=C21)NC(NC3=CC=C(C=C3)F)=O)PNC=O
1341	N(C)C=1C(=O)C=C2[C@H1](CCC3=CC(OC)=C(OC)C(OC)=C3C2=CC=1N4)C(C(=O)O)=C(N=N4)C(O)=O
1342	N(C(C)C)(O)[C@H1](O)[C@H1]1CCC(C(OC)=C1OC(CC)=O)C(OC)=CC=CNC=O
1343	O(C1=C(OC=2)C=3CC([C@@H1](N4N=NC(C(O)=O)=C4CO)OCCC=2C=C1)OC=CCC(NC)=CC=3)OC
1344	N(C)C=1C(=O)C=C2[C@H1](CCC3=C(C(OC)=C(OC)C(OC)=C3)C2=CC=1)N4C(C(=O)O)=C(N=N4)C(=O)N
1345	O=C(C=C(C(OC1C2)=O)N(N=N2)[C@@H1]3C=4C(C5=C(C(OC)=C(OC)C=C5CC3)OC)=CC=C(NC)CC=4)OC(Cl)=C1C
1346	O=C(C=C(C(OCC1)=O)N(N=N1)[C@@H1]2C=3C(C4=C(C(OC)=C(OC)C=C4CC2)OC)=CC=C(NC)CC=3)OC=CCCC
1347	O=C(NC=C1C=C(C(F)(F)F)CC=C1)N[C@@H1]2C=3C(C4=C(C(OC)=C(OC)C=C4CC2)OC)=CC=C(NC)C(C=3)=O
1348	O=C(C=C(C(OCC1)=O)N(N=N1)[C@@H1]2C=3C(C4=C(C(OC)=C(OC)C=C4CC2)OC)=CC=C(NC)CC=3)OCOCC=CC=CO
1349	O=C(C=C(C(OCC1)=O)N(N=N1)[C@@H1]2C=3C(C4=C(C(OC)=C(OC)C=C4CC2)OC)=CC=C(NC)CC=3)OC5OCCCC5=O
1350	O=C(C=C(C(O)CCCCCC)[C@H1]1CC)C2=C(C(OC)=C(OC)C(OC)=C2)C3=CC=C(NC)C(C=C31)=O
1351	O=C(C=C(C(O1)CCCCCC1)CN=N)N[C@H1]2CCC3=CC(OC)=C(OC)C(OC)=C3C=4C2=CC(C(NC)=CC=4)=O
1352	N([C@H1]1CCC2=C(C(OC)=C(OC)C(OC)=C2)C3=CC=C(NC)C(=O)C=C13)CNCC4=CC=C(C=C4)C=O
1353	O=C(C=C(Cl)C1=CN(N=N1)C(=S)N[C@@H1]2C=3C(C4=C(C(OC)=C(OC)C=C4CC2)OC)=CC=C(NC)CC=3)OC(O)=O
1354	O=C(C=C(Cl)C=CN([C@H1]1CCC2=C(C(OC)=C(OC)C(OC)=C2)C3=CC=C(NC)C(C=C13)=O)OC(=O)CC)NC(OC4=CC=CC=C4)=O
1355	O=C(C=C(C(OCC1)=O)N(N=N1)[C@@H1]2C=3C(C4=C(C(OC)=C(OC)C=C4CC2)OC)=CC=C(NC)CC=3)OC(Cl)=C
1356	O=CC(=CC=C1C([C@@H1](N2C(C(O)=O)=C(N=N2)C(O)=O)CCC3=CC(OC)=C(OC)C(OC)=C31)=C)NC=O
1357	NC(=CN/C(=NC(O)C=CCI)C1=CN(N2C1)C=CC3=CC(NC)=CC(OC)=C3C=CC4(OC)C(OC)=CC=C4)CC[C@@H1]2N=O
1358	N1=CC=C(C=C1)C(NCC=2N=NN(C=2)[C@@H1]3C4=CCC(NC)=CC=C4C5=C(OC)C(OC)=C(C=C5CC3)OC)=O
1359	N1=CC=C(C=C1)C(NCC=2N=NN(C=2)[C@@H1]3C4=CCC(NC)=CC=C4C5=C(OC)C(OC)=C(OC)C=C5CC3)=O
1360	OC(\N[C@H1]1CCC2=CC(OC)=C(OC)C(OC)=C2C3=CC=C(C(C=C31)=O)NCNC(C)C)=O
1361	O=CC(=C1C=C2C[C@H1](CCC3=CC(OC)=C(OC)C(OC)=C32)NC(C(=O)OCC)=C(NCC)OON=C1)NC
1362	N=1C(=C(C(=O)O)NCCN=NN(C=1)[C@H1]2CCC3=CC(OC)=C(OC)C(OC)=C3C4=CC=C(NC)CC=C42)OC
1363	NC(=CN/C(=NC(O)C=CCI)C1=CN(NC12)C=CC3=CC(NC)=CC(OC)=C3C=CC(OC4)C(OC)=CC5=C4)C=CC=CC5S[C@@H1]2NC
1364	OCC(C)=C1C([C@H1](CCC2=CC(OC)=C(OC)C(OC)=C12)NC(NC3=CC=C(C=C3)F)=O)PNC=O
1365	OC(\N[C@H1]1CCC2=CC(OC)=C(OC)C(OC)=C2C3=CC=C(C(=O)C=C31)OC(=O)N)(C[C@@H1])C4=CCC(OC)=C4CCO
1366	CNCC(O)(C1OC=CC=C1N=NNC)[C@@H1]2C3=CC(C(NC)=CC=C3C4=C(OC)C(OC)=C(C=C4CC2)OC)=O
1367	O=C1C(=CC=C2C([C@H1](CCC3=CC(OC)=C(OC)C(OC)=C32)N4C(C(=O)OCC)=C(N=N4)CC1=O)N)C
1368	O=CC(=CC=C1C([C@@H1](N2C(C(=O)O)=C(C(=O)O)N=N2)CCC3=CC(OC)=C(OC)C(OC)=C31)=C)NC=O
1369	O=C1C(=CC=C2C([C@@H1](N3C(C(=O)O)=C(C(O)=O)N=N3)CCC4=CC(OC)=C(OC)C(OC)=C42)=C1)NC=O
1370	CNCC(O)(C1OC=CC=C1C=2N=NNC=2)[C@H1]3CCC4=CC(OC)=C(OC)C(OC)=C4C5=CC=C(C(=O)C=C53)NC
1371	N=1C(=C(C(=O)O)NCCN=NN(C=1)[C@H1]2CCC3=CC(OC)=C(OC)C(OC)=C3C4=CC=C(NC)CC=C42)O
1372	CC(C)(C)OC(=O)NCCCNCC1=CN(N=N1)[C@H1]2CCC3=CC(OC)=C(OC)C(OC)=C3C4=CC=C(NC)C(=O)C=C42
1373	CC(C)(C)OC(=O)/N=C(/N[C@H1]1CCC2=C(C(OC)=C(OC)C(OC)=C2)C3=CC=C(NC)C(C=C31)=O)NCOC(C)=O
1374	CC(C)(C)OC(=O)/N=C(/N[C@H1]1CCC2=C(C(OC)=C(OC)C(OC)=C2)C3=CC=C(NC)C(C=C13)=O)N=N
1375	CC(C)(C)OC(=O)/N=C(/N[C@H1]1CCC2=C(C(OC)=C(OC)C(OC)=C2)C3=CC=C(NC)C(C=C31)=O)N=N
1376	C1(=CC=C1NCOCC)C=2N=NN(C=2)[C@H1]3CCC4=CC(OC)=C(OC)C(OC)=C4C5=CC=C(NC)C(C=C53)=O
1377	CC(C)(C)OC(=O)/N=C(/N[C@H1]1CCC2=C(C(OC)=C(OC)C(OC)=C2)C3=CC=C(NC)C(C=C13)=O)NCOC(C)(F)F
1378	CC(C)(C)OC(=O)NCCC(NCC1=CN(N=N1)[C@H1]2CCC3=CC(OC)=C(OC)C(OC)=C3C4=CC=C(NC)C(C=C42)=O)=O
1379	C1(OC(C=C(N1[C@H1]2CCC3=C(C(OC)=C(OC)C(OC)=C3)C4=CC=C(NC)C(C=C24)=O)CC)CC)=CO
1380	CC(C)(C)OC(=O)NCCC(OCC1=CN(N=N1)[C@H1]2CCC3=CC(OC)=C(OC)C(OC)=C3C4=CC=C(NC)C(C=C24)=O)=O
1381	CC(C)(C)OC(=O)NCCC(NCC1=CN(N=N1)[C@H1]2CCC3=CC(OC)=C(OC)C(OC)=C3C4=CC=C(NC)C(=O)C=C42)=O
1382	CC(C)(C)OC(=O)/N=C(/N[C@H1]1CCC2=C(C(OC)=C(OC)C(OC)=C2)C3=CC=C(NC)C(=O)C=C31)N=N
1383	N[C@H1]1CCC2=CC(OC)=C(OC)C(OC)=C2C3=CC=C(NC)C(C=C13)=O
1384	N([C@H1]1CCC2=CC(OC)=C(OC)C(OC)=C2C3=CC=C(NC)CC=C13)=O
1385	N[C@H1]1CCC2=CC(OC)=C(OC)C(OC)=C2C3=CC=C(NC)C(C=C31)=O
1386	N[C@H1]1CCC2=CC(OC)=C(OC)C(OC)=C2C3=CC=C(NC)C(=O)C=C31
1387	O=C(CNC=C1C(C2=C(OC)C(OC)=C(OC)C=C2CC[C@@H1]1NC=CC=C)OC)C(=O)CSC
1388	CNC(CNC(=O)OCCN[C@H1]1)CCC2=CC(OC)=C(OC)C(OC)=C2C=3C1=CC(C(=CC=3)NC)=O
1389	O=C(N[C@H1]1CCC2=CC(OC)=C(OC)C(OC)=C2C3=CC=C(NC)C(=O)C=C31)C
1390	O=C(N[C@H1]1CCC2=CC(OC)=C(OC)C(OC)=C2C3=CC=C(NC)C(C=C13)=O)C
1391	C12=C3C(C4=C(OC)C(OC)=C(OC)C=C4CC[C@@H1]3NC(=O)N)=CC=C1NC=C2

## Sheet: File 13
	AATS0Z	AATS0are	AATS0d	AATS0dv	AATS0i	AATS0m	AATS0p	AATS0pe	AATS0s	AATS0se	AATS0v	AATS1Z	AATS1are	AATS1d	AATS1dv	AATS1i	AATS1m	AATS1p	AATS1pe	AATS1s	AATS1se	AATS1v	AATS2Z	AATS2are	AATS2d	AATS2dv	AATS2i	AATS2m	AATS2p	AATS2pe	AATS2s	AATS2se	AATS2v	AATS3Z	AATS3are	AATS3d	AATS3dv	AATS3i	AATS3m	AATS3p	AATS3pe	AATS3s	AATS3se	AATS3v	AATS4Z	AATS4are	AATS4d	AATS4dv	AATS4i
0	25.0909	6.04652	3.10909	6.66263	160.775	99.0756	1.55551	6.12668	3.43542	7.62986	215.678	25.5965	6.26849	3.77193	6.35673	144.245	96.8718	1.8493	6.42389	2.91011	7.73027	261.115	20.55	6.16761	3.56	5.27667	154.669	76.0125	1.55446	6.27736	2.61515	7.73442	215.079	22.7177	6.17938	3.75	5.74194	150.84	85.5157	1.65937	6.30499	2.77016	7.69325	233.07	19.8224	6.12913	3.27632	4.2193	150.57
1	24.4483	6.00842	3.05172	6.38697	161.022	96.4733	1.53847	6.08879	3.331	7.59689	212.896	25.1167	6.24257	3.71667	6.10556	144.25	94.8362	1.84043	6.39807	2.85211	7.70669	258.942	19.9623	6.13067	3.48113	5.03459	154.633	73.5373	1.539	6.24075	2.54967	7.69973	211.523	21.6992	6.12048	3.61654	5.40602	151.696	81.3734	1.61061	6.2428	2.68672	7.646	224.307	19.0994	6.10149	3.20497	4.03934	152.366
2	23.8689	5.97407	3	6.13843	161.244	94.127	1.52311	6.05463	3.23685	7.56717	210.388	24.6825	6.21911	3.66667	5.87831	144.254	92.9944	1.83241	6.37471	2.79963	7.68535	256.977	19.4375	6.09769	3.41071	4.8006	154.601	71.3274	1.52519	6.20805	2.49567	7.66876	208.348	20.7746	6.06785	3.5	5.10563	152.496	77.6016	1.57206	6.18729	2.59918	7.60424	217.18	18.4941	6.05954	3.12941	3.86667	152.954
3	23.8689	5.97407	3.03279	6.17122	161.244	94.127	1.52311	6.05463	3.2578	7.56717	210.388	24.6825	6.21911	3.66667	5.91005	144.254	92.9944	1.83241	6.37471	2.81815	7.68535	256.977	19.6607	6.09849	3.46429	4.82738	154.65	72.4083	1.53418	6.20914	2.5046	7.66897	210.358	21.0211	6.09694	3.5	5.11268	151.099	78.2249	1.5963	6.22103	2.66158	7.62159	220.189	17.5754	6.01459	3.03352	3.68343	155.528
4	23.3438	5.94295	2.95312	5.91319	161.446	92.0007	1.50918	6.02367	3.15153	7.54023	208.115	24.2879	6.19779	3.62121	5.67172	144.259	91.3201	1.82512	6.35347	2.75192	7.66595	255.19	18.9661	6.06806	3.34746	4.5904	154.572	69.3421	1.51279	6.17868	2.44716	7.64094	205.496	19.9603	6.02148	3.39735	4.82781	153.202	74.2793	1.53811	6.1384	2.52539	7.56747	210.903	17.9218	6.02084	3.06145	3.70577	153.526
5	23.3438	5.94295	2.98438	5.94444	161.446	92.0007	1.50918	6.02367	3.17149	7.54023	208.115	24.2879	6.19779	3.62121	5.70202	144.259	91.3201	1.82512	6.35347	2.76959	7.66595	255.19	19.178	6.06882	3.39831	4.59887	154.618	70.3681	1.52132	6.17972	2.45705	7.64114	207.404	20.1589	6.04771	3.39735	4.84106	151.938	74.72	1.56469	6.16899	2.57174	7.58333	214.227	17.1383	5.96522	2.96277	3.53369	154.988
6	22.8657	5.9146	2.91045	5.70813	161.629	90.0648	1.4965	5.99548	3.07385	7.5157	206.045	23.9275	6.17832	3.57971	5.48309	144.262	89.7914	1.81846	6.33408	2.70836	7.64824	253.558	18.5403	6.0413	3.29032	4.40054	154.546	67.549	1.50159	6.15215	2.40335	7.61581	202.92	19.2375	5.98034	3.30625	4.58125	153.827	71.3309	1.50797	6.095	2.4599	7.53483	205.332	17.4043	5.98586	3	3.54965	154.043
7	22.8657	5.9146	2.9403	5.73798	161.629	90.0648	1.4965	5.99548	3.09292	7.5157	206.045	23.9275	6.17832	3.5942	5.52657	144.262	89.7914	1.81846	6.33408	2.72647	7.64824	253.558	18.7419	6.04202	3.34677	4.44892	154.59	68.5254	1.5097	6.15314	2.40671	7.616	204.735	19.6125	6.00672	3.34375	4.61875	152.621	72.6407	1.53577	6.12571	2.50174	7.55037	209.409	16.9239	5.96981	2.94924	3.41794	155.353
8	22.0274	5.86491	2.83562	5.34855	161.951	86.6703	1.47427	5.94606	2.93764	7.4727	202.416	23.2933	6.14405	3.50667	5.15111	144.269	87.1008	1.80675	6.29995	2.63169	7.61707	250.686	17.8015	5.99486	3.19118	4.07108	154.501	64.4375	1.48215	6.10611	2.32732	7.5722	198.45	18.0112	5.91053	3.15169	4.16292	154.889	66.3284	1.45685	6.02138	2.34878	7.47945	195.881	16.5049	5.92505	2.8932	3.27832	154.942
9	20.7059	5.78657	2.71765	4.7817	162.458	81.319	1.43923	5.86815	2.72292	7.4049	196.696	22.2874	6.0897	3.3908	4.62452	144.28	82.833	1.78816	6.24582	2.51008	7.56762	246.132	16.6562	5.92288	3.0375	3.56042	154.431	59.6146	1.45202	6.03476	2.20947	7.50461	191.521	16.1776	5.80614	2.92056	3.53738	156.477	58.848	1.3804	5.91129	2.18263	7.39664	181.748	15.1074	5.83058	2.72727	2.85675	156.338
10	25.1935	6.02401	3.24194	6.87814	158.813	99.5566	1.61914	6.11548	3.38267	7.59325	226.485	25.9538	6.24314	3.90769	6.58974	142.907	98.6383	1.91339	6.4061	2.95451	7.69391	271.602	21.2679	6.16733	3.6875	5.46131	151.771	78.9023	1.6448	6.29024	2.68317	7.70923	228.624	22.2113	6.13311	3.72535	5.54225	148.963	83.1765	1.67681	6.26656	2.75274	7.63955	233.613	18.8736	6.08297	3.22414	4.06513	151.985
11	25.8033	6.09547	3.27869	7.25319	159.77	102.023	1.61251	6.1813	3.5037	7.65122	226.734	26.4531	6.29928	3.9375	6.88021	143.9	100.74	1.89614	6.45759	3.03193	7.74135	270.849	21.6727	6.22817	3.71818	5.6697	153.226	80.5893	1.63025	6.34492	2.75014	7.76347	228.326	22.8116	6.18952	3.78986	5.76087	149.294	85.6002	1.69042	6.32143	2.81562	7.68621	237.126	19.193	6.10925	3.25146	4.15984	151.809
12	25.8095	6.12283	3.28571	7.2769	159.236	102.039	1.60365	6.20625	3.88101	7.68466	226.324	26.3182	6.31445	3.95455	6.89899	143.551	100.116	1.89593	6.47161	3.10335	7.76502	271.578	21.8761	6.21895	3.74336	5.79351	151.787	81.4981	1.6441	6.34018	2.81725	7.75561	230.944	22.9097	6.21188	3.76389	5.79167	149.027	86.0456	1.67432	6.34226	2.94599	7.71217	236.232	19.2247	6.17111	3.2191	4.18727	152.198
13	25.791	6.17789	3.26866	7.49917	159.91	101.951	1.57241	6.25387	3.90345	7.73825	223.291	26.3571	6.36077	3.91429	7.01905	144.104	100.232	1.85767	6.51272	3.14744	7.81135	267.987	21.825	6.27593	3.71667	5.88056	153.245	81.3757	1.59968	6.38742	2.85522	7.81938	226.962	23.4966	6.2888	3.79195	6.07383	148.818	88.3593	1.68144	6.41613	3.09284	7.78046	239.147	19.2234	6.17051	3.20213	4.12411	152.138
14	25.791	6.17789	3.26866	7.49917	159.91	101.951	1.57241	6.25387	3.90345	7.73825	223.291	26.3571	6.36077	3.91429	7.01905	144.104	100.232	1.85767	6.51272	3.14744	7.81135	267.987	21.825	6.27593	3.71667	5.88056	153.245	81.3757	1.59968	6.38742	2.85522	7.81938	226.962	23.4966	6.2888	3.78523	6.06711	148.818	88.3593	1.68144	6.41613	3.08725	7.78046	239.147	19.2234	6.17051	3.20213	4.11348	152.138
15	24.6154	5.99105	3.21538	6.68376	159.124	97.2124	1.601	6.08219	3.30005	7.56553	223.503	25.5147	6.22138	3.85294	6.44608	142.971	96.7642	1.90274	6.3841	2.9124	7.6747	269.222	20.8729	6.12933	3.65254	5.28531	152.202	77.4639	1.62918	6.2512	2.63149	7.67617	225.94	22.027	6.12649	3.68919	5.38514	148.346	82.2311	1.68565	6.26241	2.7545	7.6295	234.097	18.0968	6.03519	3.12366	3.83513	152.601
16	26.4839	6.21707	3.32258	7.78136	160.727	105.362	1.61698	6.29291	4.37909	7.74296	228.839	26.6923	6.31622	3.98462	7.11282	143.57	101.963	1.91057	6.47593	3.10836	7.75339	274.049	22.125	6.25215	3.74107	5.88988	152.54	82.761	1.64153	6.37129	2.91532	7.77827	231.465	23	6.25888	3.76056	5.8662	150.302	86.4754	1.6732	6.38564	3.03991	7.74541	236.461	19.2414	6.15831	3.23563	4.23755	152.83
17	29.8387	6.07512	3.32258	7.0008	158.543	119.81	1.68862	6.19848	3.37604	7.67966	234.112	27.4308	6.26737	3.98462	6.72991	142.798	105.003	1.95227	6.44376	2.93773	7.73121	276.944	22.9821	6.19546	3.74107	5.55655	151.644	86.2895	1.68993	6.33395	2.67766	7.75253	234.825	23.7887	6.17481	3.76056	5.60329	148.742	89.492	1.72661	6.33078	2.75874	7.70594	239.829	19.6092	6.10795	3.23563	4.09451	151.846
18	70.4839	6.02472	3.32258	6.99143	157.593	359.294	2.07363	6.15154	3.36377	7.60936	243.035	30.7538	6.24352	3.98462	6.69162	142.362	121.902	2.03372	6.42415	2.92951	7.70176	280.131	26.8393	6.16778	3.74107	5.52321	151.138	105.905	1.78446	6.31118	2.66621	7.71835	238.524	27.338	6.13377	3.76056	5.577	147.861	106.262	1.83095	6.29733	2.74518	7.65353	243.537	21.2644	6.08336	3.23563	4.0802	151.29
19	24.6154	5.99105	3.18462	6.62222	159.124	97.2124	1.601	6.08219	3.29193	7.56553	223.503	25.5147	6.22138	3.85294	6.35784	142.971	96.7642	1.90274	6.3841	2.90137	7.6747	269.222	20.7034	6.13416	3.61017	5.18362	151.886	76.5319	1.62632	6.25669	2.62372	7.67935	224.741	21.2848	6.09003	3.60927	5.19868	150.224	79.3899	1.63788	6.21894	2.66887	7.6079	226.668	18.4066	6.04043	3.15934	3.85348	151.751
20	24.7879	5.99498	3.19697	6.73401	158.634	97.9253	1.619	6.08856	3.32918	7.56515	226.534	25.6667	6.2218	3.85507	6.48309	142.736	97.4526	1.91559	6.38582	2.95473	7.67276	271.458	21	6.14611	3.62712	5.35311	151.393	77.7459	1.64619	6.27078	2.69081	7.68632	228.067	21.6133	6.095	3.63333	5.36	149.52	80.78	1.65954	6.2269	2.72556	7.60891	230.215	18.7111	6.05332	3.18333	3.98519	151.455
21	24.7879	5.99498	3.19697	6.73401	158.634	97.9253	1.619	6.08856	3.32918	7.56515	226.534	25.6667	6.2218	3.85507	6.48309	142.736	97.4526	1.91559	6.38582	2.95473	7.67276	271.458	21	6.14611	3.62712	5.35311	151.393	77.7459	1.64619	6.27078	2.69081	7.68632	228.067	21.6133	6.095	3.63333	5.36	149.52	80.78	1.65954	6.2269	2.72556	7.60891	230.215	18.7111	6.05332	3.18333	3.98519	151.455
22	23.1481	6.32268	3.24074	8.33333	161.785	91.3188	1.43593	6.37589	4.59825	7.85491	215.484	24.9821	6.43489	3.875	7.55357	145.4	94.7111	1.74134	6.57321	3.31696	7.86164	259.943	20.7423	6.38355	3.70103	6.19588	156.062	77.6253	1.46726	6.47002	3.12285	7.90601	216.938	22.7647	6.44887	3.89916	6.77311	151.048	85.4564	1.62493	6.55596	3.40406	7.91664	239.128	19.9933	6.27592	3.36242	4.95302	151.397
23	26.7037	6.20608	3.24074	7.6749	160.338	105.613	1.57976	6.28002	4.37918	7.76957	222.528	26.6964	6.34025	3.875	7.07738	144.09	101.601	1.86647	6.49488	3.13024	7.79329	267.086	21.9794	6.25678	3.70103	5.811	153.935	82.1035	1.58277	6.36629	2.92685	7.81067	222.738	24.1765	6.35355	3.89916	6.23529	149.687	90.9939	1.70971	6.47834	3.11648	7.84789	244.146	20.745	6.20905	3.36242	4.66667	150.31
24	26.6122	6.1367	3.2449	7.23356	160.191	105.236	1.59586	6.21638	3.84587	7.7079	222.264	26.6275	6.32614	3.90196	6.84967	144.383	101.231	1.88137	6.48127	3.09072	7.78441	267.692	21.9318	6.21941	3.72727	5.81439	152.963	81.7832	1.61877	6.33564	2.77385	7.78215	226.392	24.4862	6.2601	3.90826	6.31193	147.984	92.6374	1.74179	6.39585	3.02141	7.7545	246.993	20.3504	6.18509	3.24818	4.39659	150.555
25	23.7647	6.38225	3.31373	8.58824	161.563	93.822	1.44828	6.43364	5.21678	7.90564	218.636	25.3019	6.468	3.96226	7.79245	145.564	96.0654	1.76169	6.60501	3.45126	7.89314	263.997	21.4835	6.38279	3.79121	6.48352	154.44	80.726	1.51331	6.47775	3.26282	7.88891	224.12	22.681	6.46047	3.87069	6.78448	151.449	85.0748	1.60927	6.56504	3.67601	7.93002	237.021	19.8462	6.28603	3.34266	5.02098	152.138
26	24.1071	6.42723	3.30357	8.96429	161.582	95.2044	1.44594	6.47561	5.35863	7.94745	219.215	25.569	6.47162	3.91379	8.08621	145.217	97.2457	1.75247	6.6099	3.44109	7.89356	263.5	21.66	6.42354	3.73	6.61	155.339	81.5789	1.47383	6.51096	3.42361	7.93242	219.63	22.7661	6.54931	3.87097	6.89516	152.473	85.2111	1.59164	6.64526	3.59162	8.02523	236.535	20.86	6.32408	3.44667	5.48667	151.06
27	23.5254	6.37042	3.23729	8.57627	161.784	92.8431	1.43476	6.42062	5.15819	7.89889	216.3	25.0984	6.43613	3.86885	7.78689	145.174	95.2251	1.74851	6.57535	3.35656	7.86233	261.246	21.0094	6.37211	3.63208	6.38679	155.265	78.7887	1.46293	6.46112	3.28564	7.88652	215.817	22.0075	6.46432	3.74436	6.54887	153.472	82.4111	1.54121	6.55857	3.50397	7.95427	227.838	20.5577	6.38181	3.40385	5.34615	152.204
28	23	6.31911	3.20968	8.25806	161.966	90.7103	1.42466	6.37096	4.99776	7.85503	213.668	24.6719	6.40397	3.82812	7.54688	145.135	93.3939	1.74493	6.54405	3.29905	7.83403	259.203	20.6518	6.327	3.59821	6.19643	155.248	77.3783	1.46218	6.41771	3.1937	7.84576	214.422	21.5563	6.41799	3.6338	6.24648	153.002	80.4346	1.52543	6.51541	3.47359	7.90917	223.778	19.2632	6.3513	3.23977	4.94152	154.929
29	24.3175	6.36278	3.4127	8.92063	159.562	96.108	1.52073	6.42582	5.09303	7.87614	229.457	25.9242	6.42203	4.06061	8.19697	143.781	98.9402	1.82733	6.56983	3.41961	7.83795	273.539	22.2589	6.39584	3.83036	6.97321	152.37	83.8724	1.57281	6.4988	3.38864	7.88602	232.688	22.5385	6.41626	3.82517	6.94406	151.189	84.6765	1.59858	6.52367	3.49631	7.89109	235.44	20.645	6.35812	3.40237	5.63314	152.341
30	24.807	6.52938	3.31579	9.4386	162.001	98.0248	1.43185	6.56961	5.47953	8.04226	219.165	26.1525	6.55261	3.9322	8.38983	145.804	99.6664	1.7209	6.68501	3.54379	7.9721	262.118	22.1782	6.55648	3.72277	7.17822	156.645	83.5824	1.45587	6.62966	3.63311	8.06415	218.967	23.5854	6.5237	3.95122	7.21138	151.123	88.9266	1.61565	6.62803	3.59643	7.9855	241.196	20.9026	6.42573	3.40909	5.5974	152.537
31	24.2	6.46841	3.25	9.03333	162.178	95.5619	1.42156	6.51084	5.27639	7.98977	216.302	25.6613	6.51377	3.87097	8.1129	145.734	97.5612	1.71853	6.64739	3.44086	7.93757	259.967	21.5981	6.50088	3.62617	6.86916	156.447	81.116	1.43794	6.57654	3.54309	8.0126	214.403	22.4318	6.47958	3.79545	6.84091	153.234	84.2773	1.55054	6.57488	3.44907	7.96487	230.367	21.1274	6.42141	3.42038	5.59236	152.142
32	27.5294	6.25879	3.31373	7.89107	160.032	108.957	1.60057	6.33213	4.98482	7.81529	226.095	27.1132	6.368	3.96226	7.28931	144.18	103.345	1.89391	6.52225	3.25396	7.82092	271.545	22.8022	6.24767	3.78022	6.06227	152.173	85.4995	1.63643	6.36718	3.04474	7.78729	230.302	24.1293	6.3627	3.82759	6.17241	150.052	90.7555	1.69625	6.48541	3.30843	7.85949	242.169	20.4545	6.21572	3.29371	4.60373	150.967
33	27.5357	6.31479	3.30357	8.32937	160.187	108.988	1.58463	6.38316	5.14738	7.86517	226.007	27.2241	6.38024	3.91379	7.62644	143.952	103.898	1.87329	6.53428	3.2608	7.82756	270.397	22.86	6.30058	3.73	6.23667	153.277	85.9228	1.58587	6.41034	3.23349	7.83994	225.256	24.121	6.45785	3.8871	6.40323	151.166	90.5254	1.673	6.57077	3.31653	7.95925	241.351	21.6067	6.25765	3.50667	5.36889	149.98
34	26.7797	6.2637	3.23729	7.97363	160.46	105.926	1.5664	6.33287	4.95769	7.82079	222.748	26.6721	6.34925	3.86885	7.34973	143.971	101.55	1.86339	6.50345	3.18513	7.79958	267.804	22.1415	6.25611	3.63208	6.03459	153.319	82.8867	1.56863	6.36619	3.10628	7.79928	221.124	23.2707	6.37905	3.7594	6.09023	152.254	87.3657	1.61706	6.48912	3.24749	7.89276	232.328	21.2756	6.31794	3.46795	5.23932	151.166
35	26.0968	6.21756	3.20968	7.68459	160.706	103.16	1.54993	6.28745	4.80695	7.78071	219.803	26.1719	6.32116	3.82812	7.13021	143.989	99.4223	1.85442	6.47552	3.13566	7.77422	265.454	21.7232	6.21721	3.59821	5.8631	153.406	81.2568	1.56222	6.32787	3.02395	7.76319	219.445	22.7394	6.33812	3.64789	5.8169	151.861	85.0752	1.59648	6.45036	3.23337	7.85156	227.984	19.9181	6.29303	3.30409	4.8499	153.982
36	27.3651	6.26283	3.4127	8.35626	158.322	108.36	1.64402	6.34364	4.90526	7.803	235.495	27.3788	6.34173	4.06061	7.79293	142.67	104.786	1.9335	6.50338	3.26118	7.77995	279.6	23.3304	6.28605	3.83036	6.63988	150.528	87.7508	1.67285	6.40896	3.21889	7.80345	237.711	23.7133	6.33694	3.83916	6.51748	150.056	89.2847	1.66913	6.45908	3.25777	7.83388	239.616	21.3077	6.29916	3.46746	5.54635	151.383
37	28.1754	6.41892	3.31579	8.81481	160.631	111.567	1.56811	6.47878	5.27199	7.96142	225.839	27.7797	6.46278	3.9322	7.93785	144.561	106.206	1.83967	6.61067	3.36655	7.90722	268.898	23.3663	6.43473	3.72277	6.80858	154.602	87.8833	1.5668	6.53003	3.44487	7.97258	224.537	24.9512	6.43149	3.96748	6.71545	149.806	94.284	1.69767	6.55293	3.31911	7.91898	246.051	21.6299	6.36103	3.47403	5.51515	151.485
38	27.4	6.36347	3.25	8.44074	160.876	108.426	1.55101	6.42455	5.07922	7.91297	222.642	27.2097	6.42829	3.87097	7.6828	144.55	103.784	1.83155	6.57665	3.2722	7.87583	266.419	22.7196	6.38596	3.62617	6.52025	154.519	85.1757	1.54266	6.4825	3.36541	7.92617	219.661	23.7045	6.39366	3.81061	6.37879	152.006	89.2695	1.62697	6.5049	3.19066	7.90289	234.891	21.8408	6.35795	3.48408	5.51168	151.111
39	22.4727	6.24436	3.2	7.81818	162.674	88.5902	1.42821	6.30084	4.42374	7.77697	212.621	24.4561	6.40277	3.84211	7.24561	146.679	92.4577	1.74112	6.53943	3.2383	7.82464	257.549	20.2929	6.31531	3.66667	5.92929	156.588	75.7575	1.47619	6.40537	3.02946	7.82843	215.393	21.7984	6.35753	3.80645	6.30645	152.269	81.5713	1.59969	6.46454	3.22379	7.83122	232.528	19.5163	6.23928	3.31373	4.71895	152.157
40	21.96	6.1802	3.2	7.4	162.764	86.5186	1.42883	6.24055	3.90556	7.71727	211.371	24.1731	6.39494	3.86538	7.03846	147.215	91.2158	1.74368	6.53037	3.20994	7.81895	257.227	20.0778	6.28462	3.68889	5.94444	155.903	74.8097	1.50073	6.37931	2.89012	7.80232	218.231	21.886	6.26853	3.80702	6.38596	150.867	82.3161	1.6207	6.38445	3.1423	7.74047	234.231	19.0284	6.21858	3.19858	4.46099	152.553
41	23.88	6.36359	3.32	8.76	163.817	94.3258	1.45945	6.41662	4.83056	7.8566	219.86	25.7885	6.49767	4	8	147.738	98.2188	1.76201	6.62858	3.51122	7.8929	263.24	21.1798	6.36939	3.80899	6.61798	156.349	79.4616	1.52181	6.46148	3.10799	7.86773	224.096	23.2321	6.36349	3.98214	7.03571	150.939	87.968	1.65769	6.47903	3.23636	7.81337	243.136	20.6763	6.35322	3.38849	5.25899	152.969
42	23.4815	6.30296	3.40741	8.40741	163.227	92.7195	1.4711	6.3614	3.87551	7.80274	220.411	25.8421	6.49963	4.08772	8.08772	148.118	98.4619	1.7599	6.63005	3.32018	7.89032	262.869	21.5816	6.41157	3.89796	6.69388	157.122	81.0382	1.52318	6.50182	2.97732	7.89433	225.056	22.5492	6.34686	4.0082	6.70492	152.191	84.9747	1.63634	6.45878	3.08515	7.80154	238.608	20.4702	6.30587	3.50993	5.15894	152.32
43	21.9365	6.1611	3.2381	7.46032	163.558	86.4403	1.43609	6.22323	3.53263	7.68699	212.052	24.5	6.39741	3.90909	7.31818	147.604	92.6934	1.74792	6.53152	3.11111	7.80418	256.704	20.0259	6.26901	3.68103	5.96552	156.898	74.6104	1.48363	6.3625	2.76389	7.77178	214.335	20.6712	6.22193	3.70548	5.89726	154.16	77.3313	1.54698	6.32803	2.88775	7.70427	221.558	19.2514	6.25403	3.37143	4.68	155.29
44	21.5152	6.12242	3.18182	7.18182	163.648	84.7278	1.42654	6.18554	3.43645	7.65542	209.772	24.1304	6.36926	3.85507	7.05797	147.462	91.105	1.74461	6.50439	3.05193	7.78045	255.007	19.541	6.23193	3.60656	5.70492	156.757	72.5288	1.47368	6.32649	2.70378	7.7398	211.282	19.8839	6.16782	3.6	5.59355	154.75	74.1105	1.51536	6.27222	2.79857	7.66263	215.188	18.6576	6.20688	3.29348	4.5163	155.732
45	22.9831	6.28058	3.33898	8.0339	164.526	90.6841	1.43681	6.33525	3.88653	7.78382	214.615	25.3387	6.50664	4.01613	7.79032	149.703	96.2126	1.73421	6.6315	3.3078	7.89895	258.334	21.1402	6.38194	3.82243	6.48598	157.747	79.2052	1.50185	6.47087	2.94652	7.86724	220.695	22.0821	6.33423	3.8806	6.45522	153.655	83.0702	1.59146	6.44059	3.10655	7.79138	231.22	20.0122	6.33991	3.44512	5.0061	155.22
46	23.6207	6.35413	3.37931	8.44828	163.73	93.2606	1.44415	6.40572	4.28113	7.8565	217.315	25.7541	6.53572	4.06557	7.98361	148.544	97.9835	1.7392	6.66172	3.37842	7.93297	260.763	21.5524	6.43328	3.86667	6.68571	157.197	80.855	1.5071	6.52107	3.04868	7.92006	223.242	22.626	6.38169	3.9313	6.72519	153.002	85.2602	1.60632	6.48843	3.22604	7.83376	234.92	20.2716	6.36467	3.46296	5.19136	154.73
47	27.9649	6.30629	3.42105	8.16851	163.055	112.436	1.53378	6.40077	3.73888	7.85408	225.628	26.95	6.4884	4.11667	7.97593	147.811	103.242	1.79763	6.63472	3.21836	7.89915	266.396	22.3942	6.39781	3.88462	6.58761	156.996	84.1395	1.55068	6.51112	2.89947	7.91413	226.646	24.0078	6.38352	3.98438	6.61892	152.371	91.1018	1.65814	6.50883	3.09119	7.84848	241.231	21.2875	6.33272	3.48125	4.99236	154.298
48	23.082	6.30278	3.31148	8.09836	163.819	91.0723	1.43342	6.35597	4.14026	7.81401	214.59	25.2969	6.49889	4	7.67188	148.347	96.023	1.73605	6.62637	3.30208	7.90136	258.742	20.9369	6.38365	3.78378	6.30631	157.026	78.2296	1.49489	6.47293	2.96046	7.8769	219.405	21.5571	6.32101	3.80714	6.26429	153.943	80.8431	1.56605	6.42498	3.06627	7.79225	227.195	19.9941	6.32938	3.43195	5.0355	154.974
49	22.5938	6.25624	3.34375	7.875	163.9	89.0892	1.4237	6.31089	4.05653	7.7755	212.119	24.8806	6.46536	3.97015	7.65672	148.168	94.2381	1.73318	6.59418	3.25622	7.87258	256.903	21.1966	6.34654	3.81197	6.29915	156.918	79.7278	1.49486	6.43819	2.99525	7.84117	220.229	21.6376	6.39506	3.73826	6.15436	153.071	80.5763	1.56976	6.49776	3.29605	7.85966	227.492	18.6614	6.25505	3.20635	4.5873	157.381
50	21.9437	6.17619	3.32394	7.35211	163.516	86.4587	1.42623	6.23612	3.75871	7.70602	210.853	24.4667	6.40238	4.05333	7.16	147.292	92.5258	1.75644	6.5368	3.05222	7.81461	258.207	20.3185	6.26633	3.76296	5.82222	155.202	75.6886	1.51102	6.36652	2.75576	7.76331	218.219	19.6264	6.20689	3.56593	5.41209	154.802	72.7517	1.4831	6.30685	2.92392	7.70783	210.602	17.9352	6.22013	3.16204	4.33796	157.499
51	23.25	6.20656	3.46875	8.15625	161.167	91.8203	1.53049	6.27954	3.66927	7.71039	227.619	25.7206	6.41513	4.14706	8.01471	146.217	98.0972	1.82781	6.55691	3.25041	7.80886	270.692	21.7931	6.33625	3.94828	6.74138	154.166	81.9242	1.59912	6.44185	2.94636	7.81086	233.913	22.0272	6.2672	3.93197	6.55102	151.425	82.8702	1.63841	6.38484	3.02457	7.7264	236.529	20.1412	6.27743	3.48588	5.18079	153.422
52	27.75	6.25607	3.54688	8.27508	160.905	111.44	1.5978	6.35994	3.66284	7.79409	235.008	27.1324	6.43829	4.22059	8.14869	146.113	104.181	1.86497	6.59291	3.23437	7.84452	275.799	23.4483	6.3634	4	6.83333	154.044	89.0567	1.64269	6.48406	2.94104	7.85266	239.9	23.551	6.30749	3.96599	6.60998	151.212	88.9708	1.68652	6.44688	3.03036	7.79053	242.534	20.8644	6.30199	3.50282	5.22097	153.285
53	23.8095	6.27864	3.50794	8.53968	162.131	94.086	1.52266	6.34587	3.79101	7.76837	227.879	26.194	6.47133	4.1791	8.34328	147.215	100.096	1.81005	6.60835	3.3238	7.8559	269.96	22.2368	6.39942	3.97368	7.03509	155.545	83.7976	1.57925	6.49878	3.02437	7.86558	233.062	22.6573	6.34299	3.98601	6.88811	152.626	85.4861	1.63476	6.45486	3.12549	7.78968	238.155	20.6977	6.33534	3.5407	5.44767	153.873
54	22.9296	6.21591	3.35211	7.97183	161.879	90.4938	1.49226	6.28295	3.59977	7.72918	221.907	25.4	6.42638	4.01333	7.58667	146.517	96.635	1.7895	6.56476	3.19667	7.82775	265.267	21.0698	6.36616	3.78295	6.24806	155.347	78.6571	1.53835	6.46274	2.9214	7.85628	224.899	21.2919	6.28219	3.73913	6.10559	152.277	79.4741	1.58183	6.39327	3.00069	7.74998	227.247	18.8173	6.24989	3.30457	4.75635	155.868
55	24.5	6.45066	3.43333	9.16667	163.477	96.8225	1.45321	6.4978	4.63472	7.94282	220.736	26.4286	6.57109	4.09524	8.55556	148.187	100.91	1.73569	6.69764	3.47399	7.96231	262.614	22.25	6.51505	3.87963	7.27778	158.027	83.9261	1.49167	6.5948	3.25874	8.00081	223.917	23.9389	6.46801	4.03817	7.38168	151.981	90.7749	1.6368	6.57582	3.47159	7.90464	242.724	21.097	6.45359	3.49091	5.60606	154.191
56	23.9365	6.39634	3.36508	8.79365	163.575	94.534	1.4424	6.44525	4.48148	7.89757	217.934	25.9545	6.53377	4.0303	8.28788	148.013	98.8754	1.73279	6.66172	3.38047	7.93033	260.571	21.7018	6.46504	3.7807	6.98246	157.769	81.593	1.47295	6.54678	3.19396	7.95576	219.373	22.8286	6.42999	3.89286	7.00714	153.916	86.2725	1.57406	6.52907	3.34722	7.89039	232.415	21.244	6.44727	3.50595	5.6131	153.825
57	25.1228	6.51069	3.50877	9.4386	163.368	99.3518	1.46517	6.55589	5.19006	7.99284	223.833	26.7833	6.60715	4.18333	8.81667	148.471	102.416	1.75339	6.73195	3.60046	7.99517	266.329	23	6.52211	3.98039	7.56863	156.696	87.063	1.53418	6.60904	3.51416	7.99114	230.735	23.8125	6.47663	4.03125	7.41406	152.409	90.2109	1.62969	6.58208	3.54384	7.91538	241.587	21.2201	6.43755	3.50943	5.7044	154.005
58	25.2857	6.51242	3.52857	9.57143	163.252	100.556	1.50815	6.56062	5.2127	7.97097	229.365	26.8784	6.54701	4.18919	8.74324	147.012	103.131	1.79921	6.68173	3.50375	7.929	271.991	22.9921	6.51186	3.92063	7.4127	155.581	87.0602	1.55811	6.60461	3.403	7.97367	233.53	23.1266	6.46854	3.87342	7.06962	153.188	87.3135	1.59368	6.57223	3.53165	7.90815	235.399	20.466	6.44305	3.39791	5.59686	155.767
59	24.2778	6.46638	3.33333	9.08333	163.836	95.895	1.42087	6.50813	4.93596	7.96869	216.077	26.04	6.55972	4.01333	8.45333	147.933	99.1897	1.71219	6.6858	3.43222	7.96073	258.825	21.7923	6.50535	3.75385	7.28462	158.256	82.0112	1.43509	6.58067	3.34274	8.00208	215.088	23.3924	6.4995	3.93038	7.58861	155.117	88.8773	1.54295	6.58976	3.4455	7.96182	231.012	23.1979	6.61608	3.64171	6.72727	154.044
60	26.6	6.69766	3.6	10.3667	163.494	105.321	1.45983	6.73092	6.37315	8.16393	226.913	27.6349	6.70443	4.30159	9.49206	148.791	105.993	1.74749	6.82415	3.86111	8.09003	269.461	24.3113	6.6243	4.13208	8.48113	156.301	92.6331	1.54435	6.70817	3.99266	8.08064	235.984	25.3731	6.60105	4.1791	8.45522	152.452	96.868	1.64366	6.70192	3.80763	8.02236	248.283	23.3609	6.61577	3.60947	6.92899	154.406
61	19.4286	5.96181	2.81905	5.80952	164.362	76.2266	1.35585	6.02481	3.25556	7.53553	195.519	22.0833	6.22897	3.49074	5.5463	146.587	82.2637	1.70915	6.36841	2.74614	7.6691	243.885	16.8081	6.06199	3.10101	4.20202	156.184	60.6744	1.39164	6.15802	2.48246	7.60187	190.9	15.366	5.90884	2.89434	3.76981	158.778	55.5055	1.30443	5.9974	2.39298	7.47977	175.583	15.0646	5.97469	2.76871	3.37755	159.046
62	26.4348	6.82231	3.46377	10.4928	168.904	106.203	1.41774	6.83213	6.91878	8.22241	219.408	27.125	6.66637	4.11111	8.90278	149.501	104.319	1.72009	6.788	3.56192	8.03545	263.624	23.6508	6.77266	3.73016	7.76984	161.263	90.6114	1.44714	6.82949	4.74923	8.18936	220.244	22.2675	6.58504	3.75159	6.38854	157.77	83.4709	1.50591	6.66747	3.55396	8.03195	224.1	20.7151	6.5837	3.39247	5.65054	158.351
63	23.0361	6.35704	3.21687	8.24096	164.846	90.8499	1.38544	6.40017	4.55028	7.87467	208.301	25.0233	6.50678	3.7907	7.63953	148.747	94.779	1.68699	6.6313	3.28343	7.91467	252.05	20.9139	6.43316	3.56291	6.08609	158.74	78.291	1.41408	6.50861	3.22204	7.93191	208.497	20.1789	6.43011	3.41579	5.5	155.995	74.1522	1.45717	6.51596	3.17639	7.92386	210.822	18.1545	6.29023	3.07725	4.48498	159.388
64	28.2571	6.38669	3.52857	8.88007	161.318	113.353	1.57161	6.47698	4.32428	7.91491	234.036	27.527	6.50411	4.2027	8.42042	146.334	105.801	1.83584	6.65347	3.35538	7.90952	274.534	23.754	6.46147	3.93651	7.12257	154.785	90.1967	1.60114	6.57142	3.18775	7.95078	236.516	24.3038	6.39742	3.88608	6.79606	152.076	92.2465	1.64938	6.52803	3.22591	7.87788	240.141	22.2263	6.44903	3.42632	5.43509	155.091
65	24.6667	6.4092	3.49275	9.13043	162.443	97.535	1.50262	6.46583	4.45089	7.89317	227.512	26.6712	6.53533	4.15068	8.56164	147.349	102.074	1.78504	6.66846	3.44216	7.92086	269.158	22.6048	6.49478	3.90323	7.20968	156.239	85.203	1.54676	6.58498	3.26299	7.96368	230.778	22.9221	6.41516	3.9026	6.87662	152.648	86.3697	1.60509	6.52258	3.31097	7.86378	236.083	20.5187	6.4321	3.4385	5.49198	155.201
66	22.4286	6.24064	3.24286	7.77143	164.417	88.4212	1.41769	6.29519	4.10159	7.75814	210.846	24.7123	6.44292	3.89041	7.43836	148.674	93.548	1.72774	6.57215	3.20624	7.84528	255.167	20.3984	6.31826	3.64844	6.00781	157.842	76.1763	1.46998	6.40675	2.90582	7.81315	213.67	20.8025	6.30494	3.61111	5.72222	154.828	77.4866	1.51665	6.40486	3.13306	7.78093	218.286	18.5228	6.32964	3.22335	4.58376	158.434
67	19.1132	5.92457	2.80189	5.56604	164.799	74.9532	1.3526	5.98918	3.17767	7.49811	194.221	21.8349	6.21406	3.47706	5.38532	147.245	81.1995	1.70933	6.35263	2.71483	7.65151	242.781	16.59	6.02864	3.095	4.04	156.444	59.77	1.39702	6.12666	2.41264	7.56407	190.436	15.0852	5.88467	2.87037	3.62593	159.246	54.3391	1.30017	5.97319	2.36224	7.45519	173.938	14.806	5.94461	2.74916	3.2408	159.557
68	32.3438	6.42691	3.45312	8.48765	163.788	131.379	1.57028	6.54046	4.32395	7.99733	230.213	28.3582	6.55198	4.14925	8.08458	148.849	109.245	1.80817	6.70474	3.28822	7.9702	268.892	25.6552	6.47896	3.81897	6.61058	157.774	98.229	1.57893	6.60899	3.03677	8.01194	229.768	25.1528	6.46317	3.85417	6.40664	154.384	95.8894	1.60838	6.5912	3.24391	7.94981	235.503	21.0455	6.36226	3.45455	5.12563	155.314
69	25.9726	6.2458	3.20548	7.52883	164.234	103.993	1.46883	6.32865	3.96088	7.80006	215.313	25.6316	6.43629	3.89474	7.19152	148.41	97.5153	1.75879	6.57812	3.11099	7.85403	258.256	20.709	6.31407	3.58209	5.72803	157.449	76.9129	1.48794	6.42087	2.83759	7.83426	213.236	20.4503	6.25437	3.52632	5.48863	156.161	75.967	1.49915	6.3632	2.93869	7.76707	213.006	19.255	6.29038	3.25	4.64278	157.074
70	25.9726	6.2458	3.20548	7.52883	164.234	103.993	1.46883	6.32865	3.96088	7.80006	215.313	25.6316	6.43629	3.89474	7.19152	148.41	97.5153	1.75879	6.57812	3.11099	7.85403	258.256	20.709	6.31407	3.58209	5.72803	157.449	76.9129	1.48794	6.42087	2.83759	7.83426	213.236	20.4503	6.25437	3.52632	5.48863	156.161	75.967	1.49915	6.3632	2.93869	7.76707	213.006	19.255	6.29038	3.25	4.64278	157.074
71	22.5952	6.30535	3.19048	7.90476	165.392	89.0688	1.38099	6.35074	4.43659	7.82341	206.512	24.6782	6.48491	3.77011	7.41379	149.546	93.3019	1.68747	6.6085	3.23803	7.88982	250.573	20.5752	6.38471	3.54902	5.84967	159.046	76.8786	1.42082	6.46304	3.1211	7.87818	207.66	19.6667	6.38327	3.36923	5.25641	156.714	72.0591	1.44736	6.46915	3.11375	7.87844	207.641	17.7605	6.24478	3.04622	4.27311	160.036
72	27.662	6.32512	3.49296	8.47331	162.014	110.929	1.56372	6.41742	4.19295	7.85369	231.557	27.0933	6.47877	4.17333	8.14815	147.294	103.94	1.83441	6.62673	3.30176	7.88076	272.521	23.3047	6.40311	3.91406	6.79253	155.212	88.3223	1.60627	6.51596	3.06633	7.88627	235.079	23.5399	6.34741	3.82209	6.40354	152.967	89.0653	1.63236	6.4762	3.14945	7.83184	235.489	21.6649	6.39521	3.40206	5.15006	155.713
73	24.1143	6.34642	3.45714	8.71429	163.132	95.3023	1.49561	6.40557	4.31587	7.83139	225.091	26.2432	6.50923	4.12162	8.28378	148.307	100.239	1.78428	6.64116	3.38664	7.89156	267.19	22.1667	6.43497	3.88095	6.87302	156.65	83.3782	1.55283	6.52843	3.13845	7.89794	229.409	22.1824	6.36333	3.83648	6.48428	153.543	83.2933	1.58903	6.46962	3.22781	7.81703	231.441	20.0681	6.37921	3.40838	5.20942	155.834
74	23.9692	6.41899	3.33846	8.76923	164.637	94.6593	1.42347	6.46357	4.45513	7.91487	215.45	26	6.57475	3.98529	8.16176	149.515	99.0016	1.70563	6.69652	3.41176	7.9659	257.399	21.6752	6.51186	3.76068	6.78632	159.31	81.351	1.46305	6.58564	3.23955	7.99504	217.478	22.5105	6.41036	3.88112	6.45455	153.52	84.6087	1.58416	6.51402	3.22708	7.86317	232.147	20.0112	6.43162	3.40449	5.12921	156.582
75	23.4706	6.37007	3.27941	8.44118	164.677	92.6346	1.41476	6.41639	4.32108	7.87418	213.088	25.5775	6.5399	3.92958	7.92958	149.296	97.1914	1.70421	6.66318	3.32746	7.93601	255.72	21.1951	6.46567	3.6748	6.53659	159.007	79.3143	1.44711	6.54158	3.18044	7.95357	213.581	21.5724	6.37876	3.75	6.16447	155.211	80.8269	1.52948	6.47462	3.12427	7.85251	223.279	20.1934	6.42707	3.41436	5.1105	156.161
76	23.6522	6.36833	3.28986	8.49275	164.128	93.3829	1.43467	6.41764	4.38889	7.86934	216.137	25.7222	6.53587	3.94444	7.95833	148.984	97.8452	1.71928	6.66095	3.39236	7.93052	258.051	21.5203	6.4825	3.71545	6.66667	158.276	80.5691	1.4716	6.56136	3.23329	7.9635	217.451	21.7843	6.37413	3.75817	6.2549	154.364	81.647	1.54455	6.4741	3.17248	7.84122	225.319	19.8871	6.41564	3.36559	5.12366	156.966
77	22.5946	6.28411	3.2027	7.89189	164.747	89.0776	1.39946	6.33351	4.10285	7.80269	208.937	24.8312	6.47835	3.83117	7.44156	148.911	93.9941	1.7017	6.60429	3.2197	7.88323	252.755	20.4	6.38184	3.58519	6.08148	158.606	76.0307	1.43982	6.4615	3.03354	7.87979	209.798	20.3353	6.29031	3.52941	5.62941	154.989	75.4912	1.48704	6.38818	3.01046	7.77662	213.398	18.1923	6.31076	3.15865	4.58173	159.648
78	22.5946	6.28411	3.25676	7.94595	164.747	89.0776	1.39946	6.33351	4.12359	7.80269	208.937	24.8312	6.47835	3.83117	7.5974	148.911	93.9941	1.7017	6.60429	3.23214	7.88323	252.755	20.9185	6.38761	3.65926	6.12593	158.605	78.4743	1.44183	6.46793	3.0928	7.88221	211.828	20.5235	6.39548	3.52941	5.67647	154.689	75.6388	1.50834	6.48985	3.0991	7.87683	217.216	18.0748	6.21926	3.12617	4.43458	159.089
79	36.1765	6.50987	3.5	8.68845	163.937	148.033	1.60481	6.6434	4.32101	8.11053	233.95	29.6338	6.60645	4.14085	8.14554	148.996	114.671	1.81099	6.76662	3.29819	8.03847	270.393	30.561	6.58138	3.77236	6.73562	158.426	120.031	1.61381	6.72679	3.17933	8.14337	233.584	24.7303	6.47699	3.80921	6.33553	154.703	93.073	1.59327	6.62317	3.15357	8.00653	231.891	21.7845	6.45317	3.46409	5.32781	156.043
80	24.1667	6.3634	3.43056	8.75	162.572	95.5029	1.4911	6.42118	4.31057	7.85564	224.778	26.2632	6.52083	4.07895	8.32895	147.816	100.288	1.77557	6.65261	3.38816	7.91	266.76	22.3333	6.46719	3.83721	6.99225	156.028	84.0126	1.54098	6.55779	3.26335	7.93285	227.904	21.8221	6.37234	3.77914	6.39877	153.84	81.7532	1.55706	6.4744	3.16343	7.83953	227.065	20.2031	6.40013	3.41667	5.31771	155.968
81	20.9643	6.08696	3.07143	6.82143	163.062	82.4737	1.4071	6.14987	3.49603	7.63962	206.07	23.4138	6.33117	3.74138	6.53448	146.786	87.9679	1.72641	6.46889	3.02011	7.76217	251.846	18.9412	6.22617	3.52941	5.40196	157.229	69.9725	1.45157	6.31704	2.72086	7.75315	208.1	20.4884	6.18995	3.66667	5.82946	153.278	76.6707	1.55555	6.29844	2.88674	7.68323	222.332	18.641	6.16083	3.23077	4.28205	152.375
82	20.5424	6.04745	3.01695	6.54237	163.188	80.7597	1.3979	6.11144	3.3903	7.60671	203.824	23.0492	6.30259	3.68852	6.27869	146.666	86.4036	1.72373	6.44128	2.95765	7.73741	250.165	18.4537	6.18666	3.4537	5.15741	157.052	67.8788	1.44211	6.2789	2.65072	7.71807	204.998	19.6522	6.1325	3.54348	5.5	153.943	73.2553	1.51534	6.23894	2.79871	7.63833	214.587	18	6.13213	3.16364	4.10303	154.029
83	20.1613	6.01177	2.96774	6.29032	163.302	79.2116	1.38958	6.07674	3.2948	7.57699	201.795	22.7188	6.27669	3.64062	6.04688	146.557	84.9859	1.72131	6.41626	2.90104	7.71496	248.641	18.0175	6.15131	3.38596	4.92105	156.893	66.0054	1.43365	6.24477	2.59235	7.68667	202.222	18.8844	6.08092	3.43537	5.20408	154.579	70.1088	1.48393	6.18555	2.70729	7.59847	208.298	17.4655	6.08956	3.09195	3.93103	154.518
84	18.475	5.85387	2.75	5.175	163.806	72.3612	1.35278	5.92316	2.87222	7.44548	192.817	21.2439	6.16107	3.42683	5.0122	146.072	78.6581	1.71048	6.30458	2.64837	7.61478	241.841	16.1333	5.99859	3.09333	3.9	156.207	57.9125	1.39708	6.09732	2.34019	7.55105	190.23	15.7214	5.86843	2.99005	3.92537	157.198	57.1469	1.35456	5.96563	2.34563	7.43425	182.391	15.0132	5.90019	2.7807	3.11404	156.841
85	20.1613	6.01177	3	6.32258	163.302	79.2116	1.38958	6.07674	3.31541	7.57699	201.795	22.7188	6.27669	3.65625	6.125	146.557	84.9859	1.72131	6.41626	2.91797	7.71496	248.641	18.2807	6.1536	3.4386	4.97368	156.874	67.26	1.43746	6.24735	2.60721	7.68749	203.541	19.2449	6.12957	3.4898	5.23129	154.443	71.3507	1.50577	6.23457	2.76436	7.63591	212.108	17.1944	6.06946	3.06667	3.84444	154.544
86	21.7193	6.19508	3.08772	7.19298	163.455	85.5174	1.3937	6.24958	4.03558	7.73983	206.251	23.8644	6.40946	3.77966	6.62712	147.441	89.8021	1.71004	6.54111	3.1596	7.84057	252.154	19.3592	6.3062	3.5534	5.48544	157.197	71.4523	1.45223	6.39385	2.85707	7.82875	210.008	20.5606	6.23784	3.64394	5.87121	153.762	76.855	1.53787	6.34102	3.00926	7.73173	220.471	18.6541	6.18638	3.2327	4.33333	153.072
87	22.0702	6.17026	3.14035	7.47368	162.887	86.9819	1.44477	6.23328	4.12768	7.69899	213.608	24.2373	6.36666	3.83051	6.9322	146.626	91.5684	1.75668	6.50576	3.22316	7.78643	258.252	19.5534	6.26033	3.59223	5.56311	156.419	72.425	1.48457	6.35459	2.81095	7.77489	213.818	20.7879	6.22673	3.67424	5.91667	153.289	77.7522	1.56373	6.33509	3.02252	7.71026	224.069	18.9057	6.19769	3.25786	4.44025	152.949
88	25.4237	6.10116	3.0678	6.60347	162.904	102.042	1.47091	6.19866	3.37438	7.69751	211.839	24.623	6.32841	3.77049	6.33698	146.55	93.1853	1.76516	6.48141	2.92927	7.77716	255.857	19.6389	6.22691	3.49074	5.19033	156.827	72.3521	1.48419	6.34068	2.64572	7.7829	209.955	20.5797	6.164	3.57246	5.54026	153.767	76.7562	1.54827	6.28728	2.79117	7.68907	218.466	18.8727	6.16066	3.18788	4.14007	153.87
89	24.6102	6.6561	3.27119	9.28814	169.22	99.0609	1.39106	6.67078	6.55238	8.07865	211.245	25.4098	6.5362	3.93443	7.7541	148.784	97.0306	1.71471	6.66451	3.33265	7.92756	257.989	22.0093	6.6511	3.56481	6.96296	161.544	83.8789	1.43329	6.71055	4.66808	8.08329	213.471	21.0435	6.4175	3.63043	5.8913	157.14	78.7412	1.50817	6.50787	3.30686	7.88106	219.919	19.3091	6.39019	3.23636	4.66667	156.931
90	21.5238	6.06031	3.20635	7.01587	160.877	84.7917	1.48621	6.13627	3.43739	7.60251	217.772	24.0303	6.29861	3.87879	6.74242	145.161	90.787	1.80443	6.44592	3.05051	7.72249	263.297	19.8158	6.21973	3.65789	5.57018	154.113	73.4475	1.55116	6.32551	2.77656	7.72644	222.142	20.2721	6.14396	3.65306	5.62585	151.165	75.4941	1.58512	6.26212	2.85563	7.63258	224.171	17.8596	6.11179	3.18539	4.1236	153.535
91	26.0952	6.11061	3.28571	7.13659	160.611	104.723	1.55459	6.21795	3.43086	7.68754	225.279	25.4848	6.32247	3.9697	6.89562	145.053	97.0549	1.84271	6.48301	3.03567	7.75923	268.559	21.5	6.24736	3.7193	5.68811	153.988	80.7051	1.5955	6.36846	2.76867	7.76898	228.235	22.3401	6.18553	3.70748	5.7158	150.962	84.1728	1.64355	6.32645	2.85164	7.69763	231.898	19.3876	6.16265	3.21348	4.17104	153.251
92	22.1875	6.15703	3.25	7.40625	161.261	87.4663	1.47304	6.22529	3.92708	7.69234	217.751	24.4179	6.36803	3.91045	7.02985	145.761	92.3601	1.78885	6.50986	3.19403	7.79212	263.398	20.4261	6.26999	3.70435	5.83478	154.108	76.0455	1.55128	6.37428	2.92343	7.77186	224.478	20.7383	6.21733	3.66443	5.77852	151.198	77.263	1.58303	6.33243	3.03729	7.70176	225.91	17.8516	6.14037	3.15934	4.15385	153.88
93	22.0645	6.1312	3.24194	7.3871	161.851	86.9805	1.47755	6.20136	3.55735	7.65969	217.877	24.4923	6.35474	3.90769	7.03077	146.173	92.7351	1.78576	6.49722	3.12821	7.76965	262.429	20.1875	6.28042	3.6875	5.77679	155.584	75.0069	1.53519	6.37985	2.844	7.78001	221.734	20.7972	6.19871	3.71329	5.83916	151.546	77.6181	1.59569	6.31495	2.91919	7.67741	227.297	18.1543	6.13796	3.21143	4.21714	153.39
94	25.6333	6.09289	3.26667	7.07407	160.319	101.319	1.59291	6.17594	3.44959	7.65306	223.454	26.3175	6.31997	3.93651	6.66138	144.878	100.081	1.87594	6.47398	2.9901	7.76297	267.985	21.9174	6.24052	3.70642	5.57187	154.008	81.862	1.61993	6.35286	2.71628	7.77145	226.614	21.5328	6.17898	3.72993	5.74939	150.682	80.0288	1.62644	6.30401	2.83327	7.68762	227.684	19.1024	6.16212	3.28313	4.34337	152.363
95	23.1111	6.32916	3.24074	8.11111	163.826	91.1736	1.41719	6.37862	4.70936	7.84585	212.645	24.9286	6.48912	3.89286	7.51786	148.812	94.3925	1.72175	6.61684	3.39137	7.90071	257.277	21	6.39355	3.72917	6.32292	156.994	78.6015	1.49017	6.47935	3.28385	7.89092	218.709	22.0902	6.36524	3.84426	6.45902	152.294	82.8736	1.6046	6.47274	3.23702	7.83371	233.887	19.8146	6.28062	3.33113	4.86093	152.717
96	22.5614	6.27552	3.17544	7.82456	163.916	88.9416	1.40713	6.3268	4.39571	7.80094	209.974	24.5593	6.45444	3.83051	7.27119	148.455	92.8207	1.70953	6.58368	3.26977	7.86923	253.996	20.3431	6.37228	3.62745	6.08824	158.441	75.8274	1.46015	6.45357	3.08007	7.87591	213.163	21.8047	6.32461	3.78906	6.25781	152.564	81.8759	1.58081	6.43198	3.19466	7.79903	229.894	19.5669	6.32577	3.29936	4.73248	153.825
97	21.619	6.18357	3.09524	7.2381	164.071	85.1153	1.38988	6.23798	4.13228	7.72394	205.395	23.7692	6.38942	3.72308	6.81538	148.076	89.4366	1.70607	6.52126	3.13718	7.81286	250.642	19.5789	6.28583	3.52632	5.59649	157.891	72.6913	1.44011	6.371	2.95078	7.79792	207.415	20.1712	6.26667	3.5274	5.67808	154.973	74.8634	1.5122	6.36607	3.01998	7.7576	216.494	18.3876	6.19488	3.14045	4.32022	155.682
98	22.0667	6.22724	3.15	7.6	163.998	86.9328	1.39807	6.28017	4.23843	7.76051	207.57	24.2258	6.42311	3.77419	7.08065	148.133	91.401	1.69849	6.55373	3.20296	7.84079	251.033	19.9907	6.35421	3.59259	5.88889	159.778	74.4826	1.44278	6.43179	2.96836	7.86278	210.318	21.7687	6.31717	3.73881	6.07463	151.386	81.464	1.5891	6.42933	3.21828	7.78533	230.005	18.3779	6.28766	3.15116	4.37209	156.426
99	21.2121	6.14386	3.04545	7.0303	164.138	83.463	1.38244	6.19963	3.9819	7.69069	203.418	23.5	6.36372	3.70588	6.66176	147.799	88.2915	1.69615	6.49671	3.0674	7.78942	248.088	19.0917	6.27314	3.45833	5.475	159.076	70.6288	1.4171	6.35451	2.83472	7.78981	203.266	20.3355	6.23753	3.57237	5.56579	155.166	75.9323	1.50906	6.33756	2.9545	7.73171	216.78	18.6848	6.27973	3.15217	4.2337	154.488
100	20.5	6.07437	3.01389	6.61111	164.255	80.5716	1.3694	6.1325	3.80363	7.63251	199.958	22.8919	6.31396	3.64865	6.36486	147.519	85.6862	1.6942	6.44893	2.98986	7.74638	245.622	18.7348	6.20817	3.45455	5.16667	158.584	69.3101	1.41133	6.29313	2.74348	7.73047	200.908	19.5588	6.22135	3.44118	5.18824	155.901	72.355	1.49319	6.31957	2.86225	7.71762	212.261	17.6776	6.15309	3.02804	3.7757	155.541
101	22.4923	6.27792	3.21538	7.78462	163.827	88.6538	1.39992	6.32814	4.14701	7.8077	208.92	24.7353	6.45931	3.91176	7.07353	147.805	93.5872	1.7028	6.58971	3.11152	7.87519	253.618	20.157	6.42121	3.61157	5.7438	158.822	74.7131	1.43515	6.49818	2.94146	7.92695	209.877	20.5484	6.31472	3.64516	5.72903	154.848	76.4287	1.50714	6.41124	2.99946	7.80526	217.218	18.6413	6.27897	3.20109	4.46739	155.323
102	22.9375	6.22867	3.29688	7.90625	161.672	90.516	1.485	6.29407	4.23958	7.74676	221.067	25.0299	6.40764	3.95522	7.47761	146.655	95.0182	1.7884	6.54734	3.26493	7.81735	265.02	21.1491	6.34246	3.74561	6.28947	154.672	79.0537	1.55214	6.44122	3.11209	7.82729	225.605	21.2517	6.2857	3.72109	6.18367	152.706	79.4294	1.57752	6.39466	3.11621	7.76092	227.372	19.4	6.25633	3.29143	4.84571	153.922
103	27.4375	6.27818	3.375	8.02508	161.411	110.136	1.55231	6.37447	4.23316	7.83047	228.456	26.4627	6.43115	4.02985	7.6136	146.549	101.193	1.82612	6.58388	3.24865	7.85354	270.203	22.8333	6.3701	3.79825	6.38304	154.548	86.3113	1.59647	6.48416	3.10667	7.86983	231.697	22.7755	6.32599	3.7551	6.24263	152.493	85.5301	1.62563	6.4567	3.12201	7.82505	233.377	20.1314	6.28117	3.30286	4.88635	153.783
104	24.1875	6.4157	3.375	8.78125	163.526	96.1398	1.4829	6.46595	5.20486	7.89179	223.348	25.7463	6.47854	4.02985	7.98507	147.298	98.2433	1.78566	6.61509	3.41418	7.87506	267.395	21.9912	6.4258	3.79825	6.71053	155.428	82.8447	1.54892	6.52085	3.34016	7.89512	228.396	22.0136	6.4072	3.7551	6.4966	153.999	82.616	1.57403	6.5097	3.39361	7.86317	230.123	19.7657	6.33124	3.30286	5.02857	154.762
105	26.0597	6.7235	3.49254	10.0896	167.158	104.763	1.46739	6.74633	6.90558	8.12858	224.953	26.7	6.58303	4.15714	8.67143	148.401	102.614	1.77555	6.71445	3.53571	7.95911	269.809	23.9667	6.71434	3.80833	8.15	158.993	92.0319	1.53346	6.78377	4.88148	8.11758	230.743	22.9935	6.45959	3.80392	6.94771	153.651	87.1357	1.58278	6.56362	3.62328	7.89806	234.324	20.3904	6.48421	3.26738	5.31551	157.46
106	26.6667	6.21256	3.24074	7.45267	162.379	105.468	1.56102	6.28274	3.83307	7.76052	219.689	25.7857	6.4418	3.89286	7.1369	148.157	97.8373	1.78432	6.57768	3.22162	7.86653	260.849	22.1667	6.32576	3.72917	5.93403	156.008	83.2883	1.53825	6.42488	2.89767	7.84454	221.867	22.6803	6.28617	3.84426	6.32787	150.904	84.853	1.66771	6.40824	3.03443	7.7736	236.859	20.5033	6.23008	3.33113	4.64901	151.938
107	25.9298	6.16506	3.17544	7.20078	162.546	102.483	1.54339	6.23598	3.56554	7.7201	216.648	25.3729	6.40953	3.83051	6.9096	147.833	96.0903	1.76892	6.54651	3.10865	7.83679	257.386	21.4412	6.30848	3.62745	5.66993	157.513	80.2386	1.5054	6.4023	2.80047	7.83225	216.135	22.6797	6.24677	3.78906	6.09115	151.298	85.143	1.65741	6.36815	2.95701	7.7409	233.866	20.3822	6.2326	3.29936	4.52866	152.229
108	24.1212	6.04846	3.01515	6.40067	162.954	95.1581	1.50011	6.12118	3.27251	7.62088	209.181	24.1324	6.32224	3.67647	6.20098	147.372	90.8054	1.75609	6.46193	2.92148	7.76026	252.129	19.7917	6.19088	3.40833	4.96944	156.927	73.2285	1.46701	6.28795	2.61929	7.72623	205.931	19.9871	6.10122	3.43226	5.17634	154.585	74.2289	1.52795	6.21075	2.69795	7.62995	211.055	19.1547	6.13085	3.12155	4.06262	154.539
109	25.2667	6.1223	3.15	7.00741	162.696	99.7974	1.52752	6.19388	3.44977	7.68372	213.91	25	6.38037	3.77419	6.73656	147.541	94.5124	1.755	6.51835	3.04963	7.80992	254.259	21.0278	6.29395	3.59259	5.44444	158.901	78.6486	1.48551	6.38337	2.73071	7.82155	213.125	22.903	6.24044	3.73881	5.87562	150.234	85.9037	1.67798	6.36612	2.94871	7.729	234.887	19.2616	6.16194	3.15116	4.18605	154.196
110	24.1212	6.04846	3.04545	6.49158	162.954	95.1581	1.50011	6.12118	3.26494	7.62088	209.181	24.2059	6.32475	3.70588	6.34804	147.259	91.1283	1.74768	6.46446	2.92761	7.76128	251.03	20.025	6.2189	3.45833	5.075	158.287	74.3783	1.45556	6.31093	2.62083	7.75271	205.793	21.3355	6.16989	3.57237	5.32018	154.151	79.8463	1.58741	6.28183	2.75437	7.68205	221.084	19.9457	6.15875	3.15217	4.00181	152.486
111	24.4706	6.05439	3.07353	6.65359	161.891	96.6024	1.53802	6.1324	3.43362	7.61851	215.485	24.5429	6.32261	3.74286	6.45238	146.675	92.6465	1.77743	6.46554	3.07253	7.75497	255.958	20.6917	6.2534	3.55833	5.30833	156.788	76.9506	1.50578	6.35147	2.72917	7.77306	213.728	21.7078	6.17401	3.6039	5.5368	152.292	81.23	1.6179	6.29292	2.83548	7.67639	225.276	19.8021	6.14555	3.14062	4.09896	154.216
112	25.2941	6.23086	3.07353	7.12418	163.616	99.8878	1.47491	6.2892	4.17626	7.78943	209.393	24.9429	6.4569	3.77143	6.50952	148.349	94.1299	1.71948	6.58633	3.16539	7.89345	251.572	20.7131	6.35417	3.51639	5.2377	158.214	76.8046	1.45661	6.44072	2.85656	7.88035	209.052	21.4241	6.25066	3.55063	5.51055	154.927	80.0336	1.55665	6.3536	2.9272	7.76314	218.021	20.2947	6.20567	3.17368	4.25614	153.649
113	24.8438	6.08622	3.20312	6.78819	162.268	98.1001	1.5331	6.16122	3.28103	7.64908	214.747	24.9254	6.34825	3.91045	6.56219	146.779	94.2803	1.78215	6.49053	2.89294	7.77719	257.673	20.6917	6.2534	3.60833	5.225	156.788	76.9506	1.50578	6.35147	2.61667	7.77306	213.728	20.5449	6.12702	3.55769	5.2094	153.891	76.3892	1.55866	6.23934	2.68588	7.64727	214.754	19.9441	6.14346	3.18994	4.16015	154.037
114	30.4375	6.1798	3.375	7.46952	160.19	122.197	1.67367	6.29357	3.49379	7.75847	234.399	27.1791	6.3916	4.02985	7.29519	146.001	104.072	1.87841	6.55115	3.10677	7.82498	273.188	23.8158	6.313	3.79825	6.00877	153.717	90.2581	1.63696	6.4383	2.85651	7.83077	234.357	23.5374	6.2582	3.7551	5.98866	151.391	88.375	1.69233	6.40112	2.928	7.77443	236.835	21.2743	6.20727	3.30286	4.52063	152.691
115	28.9254	6.62953	3.49254	9.55887	165.992	116.283	1.58331	6.66906	6.19931	8.05981	230.63	27.3857	6.54517	4.15714	8.36667	147.877	105.369	1.82561	6.68312	3.39991	7.93177	272.666	24.9	6.6601	3.80833	7.79444	158.204	95.7813	1.57193	6.74019	4.64383	8.08047	233.269	23.7255	6.39447	3.80392	6.7037	152.592	89.869	1.64686	6.51022	3.43688	7.84942	237.647	21.4599	6.41505	3.26738	4.97326	156.438
116	24.3077	6.24756	3.24176	7.23565	163.908	95.8965	1.42714	6.29963	3.65903	7.80969	204.935	24.8737	6.46697	3.89474	6.77544	147.702	93.8856	1.69458	6.59634	2.96397	7.90538	250.048	21.5896	6.45708	3.64162	5.40655	157.522	80.7539	1.40194	6.53649	2.92194	7.98114	206.917	19.792	6.49177	3.38938	4.79794	157.027	71.8959	1.42575	6.56672	3.03657	8.02892	203.064	17.9669	6.20154	3.05882	4.04044	156.696
117	25.8182	6.39361	3.1039	7.51227	164.617	101.985	1.42311	6.43547	5.20581	7.94404	205.965	25.1519	6.57167	3.83544	6.59072	149.549	94.8436	1.68669	6.68996	3.39022	8.01502	250.643	21.5109	6.44522	3.54745	5.46959	156.561	79.9018	1.45663	6.53281	3.10124	7.96319	212.482	21.0532	6.42176	3.33511	5.55496	156.453	78.0344	1.44192	6.50365	3.78244	7.94362	205.884	18.9336	6.36867	2.93363	4.17699	158.055
118	21.9529	6.26741	3.10588	7.62353	165.009	86.4399	1.3543	6.31168	4.43219	7.80649	201.634	23.8966	6.43577	3.58621	7.18391	148.397	89.8955	1.66287	6.56283	3.20881	7.8621	246.018	20.4379	6.3719	3.46405	5.84967	159.14	76.6608	1.38598	6.44444	3.2874	7.88181	202.742	19.6082	6.4288	3.26804	5.46392	155.212	71.334	1.45341	6.51607	3.14927	7.92806	208.494	17.304	6.13223	2.9	4.292	160.916
119	22.4364	6.25072	3.2	7.6	164.678	88.4476	1.40981	6.30351	4.20556	7.76808	209.834	24.5088	6.47491	3.84211	7.24561	149.85	92.5645	1.71315	6.60019	3.36111	7.88518	254.61	20.701	6.35712	3.72165	6.1134	157.229	77.3407	1.49305	6.44531	3.13316	7.85265	217.922	21.7742	6.33995	3.80645	6.30645	153.41	81.5232	1.59937	6.4467	3.16734	7.80186	231.785	19.2774	6.22773	3.28387	4.65806	153.556
[truncated: 1,172 more columns]

## Sheet: File 39
	AI_generated_SMILES	COc2c3C1=CC=C(SC)C(=O)C=C1[C@H](CCc3cc(OC)c2OC)NCC	COc2c3C1=CC=C(SC)C(=O)C=C1[C@H](CCc3cc(OC)c2OC)NCCC	COc2c3C1=CC=C(SC)C(=O)C=C1[C@H](CCc3cc(OC)c2OC)NCCCC	CC(C)CN[C@H]2CCc3cc(OC)c(OC)c(OC)c3C1=CC=C(SC)C(=O)C=C12	COc2c3C1=CC=C(SC)C(=O)C=C1[C@H](CCc3cc(OC)c2OC)NCCCCC	CC(C)CCN[C@H]2CCc3cc(OC)c(OC)c(OC)c3C1=CC=C(SC)C(=O)C=C12	COc2c3C1=CC=C(SC)C(=O)C=C1[C@H](CCc3cc(OC)c2OC)NCCCCCC	CC(CCC)CN[C@H]2CCc3cc(OC)c(OC)c(OC)c3C1=CC=C(SC)C(=O)C=C12	COc2c3C1=CC=C(SC)C(=O)C=C1[C@H](CCc3cc(OC)c2OC)NCCCCCCCC	COc2c3C1=CC=C(SC)C(=O)C=C1[C@H](CCc3cc(OC)c2OC)NCCCCCCCCCCCC	COc2c3C1=CC=C(SC)C(=O)C=C1[C@H](CCc3cc(OC)c2OC)NCc4ccccc4	COc3c(OC)c(OC)cc4CC[C@H](NCc1ccncc1)C2=CC(=O)C(SC)=CC=C2c34	Oc4ccccc4CN[C@H]2CCc3cc(OC)c(OC)c(OC)c3C1=CC=C(SC)C(=O)C=C12	Oc1ccc(cc1OC)CN[C@H]3CCc4cc(OC)c(OC)c(OC)c4C2=CC=C(SC)C(=O)C=C23	COc1ccc(cc1O)CN[C@H]3CCc4cc(OC)c(OC)c(OC)c4C2=CC=C(SC)C(=O)C=C23	Cc1ccc(cc1)CN[C@H]3CCc4cc(OC)c(OC)c(OC)c4C2=CC=C(SC)C(=O)C=C23	Fc1ccc(cc1)CN[C@H]3CCc4cc(OC)c(OC)c(OC)c4C2=CC=C(SC)C(=O)C=C23	Clc1ccc(cc1)CN[C@H]3CCc4cc(OC)c(OC)c(OC)c4C2=CC=C(SC)C(=O)C=C23	Ic1ccc(cc1)CN[C@H]3CCc4cc(OC)c(OC)c(OC)c4C2=CC=C(SC)C(=O)C=C23	COc2c3C1=CC=C(SC)C(=O)C=C1[C@H](CCc3cc(OC)c2OC)NCCc4ccccc4	COc2c3C1=CC=C(SC)C(=O)C=C1[C@H](CCc3cc(OC)c2OC)NC/C=C/c4ccccc4	COc3cc2CC[C@@H](NC(C)=O)c1cc(=O)c(OC)ccc1c2c(OC)c3OC	COc3cc2CC[C@H](NC(C)=O)c1cc(=O)c(SC)ccc1c2c(OC)c3OC	COc3cc2CC[C@H](N)c1cc(=O)c(SC)ccc1c2c(OC)c3OC	CC(=O)N[C@H]2CCc3cc(OC)c(OC)c(OC)c3C1=CC=C(O)C(=O)C=C12	CC(=O)OC1=CC=C2C(=CC1=O)[C@H](CCc3cc(OC)c(OC)c(OC)c23)NC(C)=O	CCC(=O)OC1=CC=C2C(=CC1=O)[C@H](CCc3cc(OC)c(OC)c(OC)c23)NC(C)=O	CC(C)C(=O)OC1=CC=C2C(=CC1=O)[C@H](CCc3cc(OC)c(OC)c(OC)c23)NC(C)=O	CC(=O)N[C@H]3CCc4cc(OC)c(OC)c(OC)c4C2=CC=C(OC(=O)c1ccccc1)C(=O)C=C23	O=C(OC)OC1=CC=C2C(=CC1=O)[C@H](CCc3cc(OC)c(OC)c(OC)c23)NC(C)=O	O=C(OCC)OC1=CC=C2C(=CC1=O)[C@H](CCc3cc(OC)c(OC)c(OC)c23)NC(C)=O	CC(=O)N[C@H]2CCc3cc(OC)c(OC)c(O)c3C1=CC=C(SC)C(=O)C=C12	CC(=O)Oc2c3C1=CC=C(SC)C(=O)C=C1[C@H](CCc3cc(OC)c2OC)NC(C)=O	CCC(=O)Oc2c3C1=CC=C(SC)C(=O)C=C1[C@H](CCc3cc(OC)c2OC)NC(C)=O	CC(C)C(=O)Oc2c3C1=CC=C(SC)C(=O)C=C1[C@H](CCc3cc(OC)c2OC)NC(C)=O	CC(=O)N[C@H]3CCc4cc(OC)c(OC)c(OC(=O)c1ccccc1)c4C2=CC=C(SC)C(=O)C=C23	O=C(OC)Oc2c3C1=CC=C(SC)C(=O)C=C1[C@H](CCc3cc(OC)c2OC)NC(C)=O	O=C(OCC)Oc2c3C1=CC=C(SC)C(=O)C=C1[C@H](CCc3cc(OC)c2OC)NC(C)=O	CC(=O)N[C@H]2CCc3cc(OC)c(OC)c(OC)c3C1=CC=C(NC)C(=O)C=C12	COc2c3C1=CC=C(NC)C(=O)C=C1[C@@H](N)CCc3cc(OC)c2OC	COc2c3C1=CC=C(NC)C(=O)C=C1[C@H](CCc3cc(OC)c2OC)/N=[N+]=[N-]	COc3c(OC)c(OC)cc2CC[C@@H](C1=CC(=O)C(NC)=CC=C1c23)n4ccnn4	COc3c(OC)c(OC)cc2CC[C@@H](C1=CC(=O)C(NC)=CC=C1c23)n4cc(nn4)CCC	COc3c(OC)c(OC)cc2CC[C@@H](C1=CC(=O)C(NC)=CC=C1c23)n4cc(nn4)CCCC	COc3c(OC)c(OC)cc2CC[C@@H](C1=CC(=O)C(NC)=CC=C1c23)n4cc(nn4)CN	COc3c(OC)c(OC)cc2CC[C@@H](C1=CC(=O)C(NC)=CC=C1c23)n4cc(nn4)CO	COc3c(OC)c(OC)cc2CC[C@@H](C1=CC(=O)C(NC)=CC=C1c23)n4cc(nn4)CCl	COc3c(OC)c(OC)cc2CC[C@@H](C1=CC(=O)C(NC)=CC=C1c23)n4cc(nn4)CCO
3	COC1=C2C3=CC=C(NC)C(=O)C=C3[C@H1](CCC2=CC(OC)=C1OC)NCCONC	0.843949	0.837411	0.834776	0.833595	0.83281	0.832288	0.83242	0.825311	0.831768	0.831768	0.811526	0.79709	0.796947	0.806626	0.806476	0.809006	0.803379	0.804465	0.804147	0.837392	0.821622	0.862969	0.824903	0.780876	0.864754	0.843651	0.837264	0.832943	0.81079	0.833203	0.829705	0.792996	0.783248	0.777697	0.773517	0.760454	0.779562	0.778504	0.957465	0.909247	0.861874	0.697115	0.674312	0.671671	0.683267	0.681486	0.674786	0.674967
8	COC1=C2C3=CC=C(NC)C(=O)C=C3[C@H1](CCC2=CC(OC)=C1OC)NCCCCC	0.843278	0.852824	0.856006	0.848892	0.858393	0.853407	0.857937	0.850511	0.857256	0.857256	0.812305	0.797856	0.79771	0.806005	0.805855	0.809783	0.804147	0.806626	0.804916	0.839623	0.820988	0.857724	0.824261	0.780255	0.860998	0.838608	0.833725	0.828016	0.808801	0.826833	0.821981	0.792379	0.785294	0.779723	0.77424	0.761162	0.776402	0.774077	0.956667	0.908469	0.865696	0.695473	0.672775	0.671233	0.681698	0.681034	0.672142	0.673429
9	COC1=C2C3=CC=C(NC)C(=O)C=C3[C@H1](CCC2=CC(OC)=C1OC)NCCCCCC	0.84127	0.850794	0.853968	0.846882	0.856349	0.851383	0.860317	0.848509	0.859635	0.859635	0.810412	0.796028	0.795887	0.804147	0.803997	0.807901	0.802299	0.804766	0.803065	0.837647	0.819092	0.855637	0.822343	0.778396	0.858891	0.836622	0.831768	0.826087	0.808333	0.826324	0.821484	0.790535	0.783566	0.77802	0.772563	0.760793	0.776	0.77368	0.954281	0.906143	0.8636	0.696367	0.674738	0.67319	0.682571	0.681909	0.673014	0.675393
19	COC1=C2C3=CC=C(NC)C(=O)C=C3[C@H1](CCC2=CC(OC)=C1OC)N4C=C(N=N4)CNCC	0.629749	0.629084	0.627476	0.632118	0.627313	0.628189	0.629464	0.628173	0.629063	0.629063	0.630937	0.626667	0.632147	0.633695	0.633461	0.629321	0.632484	0.629936	0.633121	0.632992	0.633249	0.622727	0.628499	0.625747	0.618986	0.626923	0.625478	0.625238	0.632935	0.630102	0.631512	0.603437	0.635913	0.635243	0.63458	0.63675	0.632615	0.635359	0.682206	0.682725	0.68	0.942155	0.952079	0.94807	0.988431	0.963571	0.958126	0.952784
21	COC1=CC2=CC=C(NC)C(C=C2[C@@H1](N3C=C(N=N3)CN)CCC1=CC(=COC)OC)=O	0.453199	0.456856	0.457497	0.458997	0.457547	0.458456	0.457916	0.460951	0.458505	0.458505	0.458259	0.461176	0.463572	0.465171	0.464855	0.458038	0.467809	0.464581	0.461493	0.460767	0.470831	0.447101	0.460859	0.425481	0.443447	0.460808	0.462175	0.462625	0.474547	0.461947	0.465568	0.453842	0.478662	0.48046	0.481397	0.491747	0.477338	0.4811	0.486535	0.451257	0.469314	0.591214	0.618761	0.619448	0.630262	0.623708	0.618961	0.620337
24	C1=C2C(C3=C(OC)C(=C(C=C3CC4[C@@H1]2NCC4CCC)OC)OC)=CC=C(NC)C1=O	0.792035	0.800885	0.803835	0.802796	0.806047	0.804268	0.809735	0.8125	0.810472	0.810472	0.769398	0.759114	0.764117	0.767793	0.765086	0.767173	0.762348	0.764537	0.765591	0.793129	0.78556	0.79895	0.787064	0.733579	0.801659	0.78928	0.785142	0.786647	0.768414	0.784157	0.779942	0.757267	0.763359	0.759476	0.760467	0.748318	0.758787	0.756683	0.88727	0.828393	0.801191	0.687337	0.678616	0.678168	0.682973	0.685551	0.673804	0.67819
26	C12=CC(C(NC)=CC=C1C=C(CC[C@@H1]2NCCC(F)(F)F)C=C(OC)C(OC)=COC)=O	0.421804	0.428664	0.431258	0.429218	0.433204	0.431436	0.43273	0.433355	0.433376	0.433376	0.423674	0.426187	0.426104	0.426735	0.426367	0.424419	0.425914	0.427928	0.426555	0.431157	0.43389	0.411111	0.422165	0.388158	0.410761	0.418065	0.420681	0.420447	0.42821	0.421424	0.425464	0.419544	0.434268	0.436375	0.437577	0.433171	0.433086	0.438119	0.458005	0.424222	0.429508	0.420957	0.429412	0.430417	0.431116	0.430523	0.430514	0.43
28	C1=C2C([C@H1](CCC3=CC(OC)=C(C(=C32)OC)OC)NCCCCl)(C(NC)=C1)O	0.49713	0.499714	0.501144	0.504293	0.50286	0.504577	0.50486	0.512014	0.505432	0.505432	0.497712	0.504561	0.509412	0.505137	0.504854	0.499142	0.505131	0.502851	0.504843	0.50257	0.51659	0.4942	0.505137	0.469186	0.490708	0.503738	0.50659	0.510297	0.519886	0.506293	0.509703	0.489386	0.530968	0.533408	0.537556	0.544797	0.531987	0.534714	0.508	0.468841	0.491671	0.537563	0.55744	0.560722	0.556718	0.551043	0.555677	0.560548
29	C=1=C2C([C@H1](CCC3=CC(OC)=C(C(=C32)OC)OC)NCCCCl)(C(NC)=CC=1)O	0.502864	0.505425	0.506849	0.509994	0.508562	0.510274	0.510553	0.517694	0.511124	0.511124	0.50171	0.507666	0.515083	0.508243	0.507964	0.503134	0.509091	0.507675	0.509659	0.508262	0.516202	0.496536	0.512543	0.476771	0.493927	0.506873	0.508842	0.512528	0.524646	0.507684	0.510216	0.495991	0.539111	0.540662	0.544793	0.551111	0.536654	0.538504	0.511098	0.472158	0.497421	0.547327	0.56705	0.570334	0.566391	0.563256	0.567894	0.570175
31	C1=C2C([C@H1](CCC3=CC(OC)=C(C(=C32)OC)OC)NCCCCl)(C(=C1)NC)O	0.49713	0.499714	0.501144	0.504293	0.50286	0.504577	0.50486	0.512014	0.505432	0.505432	0.497712	0.504561	0.509412	0.505137	0.504854	0.499142	0.505131	0.502851	0.504843	0.50257	0.51659	0.4942	0.505137	0.469186	0.490708	0.503738	0.50659	0.510297	0.519886	0.506293	0.509703	0.489386	0.530968	0.533408	0.537556	0.544797	0.531987	0.534714	0.508	0.468841	0.491671	0.537563	0.55744	0.560722	0.556718	0.551043	0.555677	0.560548
32	C12=CC(C(NC)=CC=C1C=C(CC[C@H1]2NCCC(F)F)F)OC=O	0.299539	0.301442	0.304063	0.301567	0.305174	0.304575	0.306736	0.307092	0.30739	0.30739	0.300984	0.302794	0.305646	0.304036	0.304433	0.301899	0.304291	0.303385	0.305791	0.301825	0.30974	0.301609	0.301494	0.288632	0.299933	0.311052	0.310775	0.311969	0.320181	0.319472	0.32042	0.29249	0.3138	0.313087	0.314838	0.328784	0.325743	0.326826	0.299417	0.285228	0.294855	0.316636	0.333936	0.335138	0.326679	0.32929	0.32971	0.332932
35	C12=NCCC1[C@H1]CNC32C4CC=CC=C3C4=CC	0.3582	0.361401	0.36386	0.365479	0.365704	0.367548	0.368777	0.373849	0.369392	0.369392	0.366049	0.371393	0.373162	0.370166	0.369779	0.367674	0.366972	0.369552	0.372621	0.361468	0.370348	0.344272	0.364303	0.340493	0.342024	0.350856	0.352798	0.354545	0.365824	0.358537	0.36336	0.355817	0.381493	0.382056	0.384251	0.396349	0.382283	0.387173	0.356406	0.33061	0.345611	0.379754	0.400229	0.402865	0.392754	0.394585	0.395522	0.401606
37	O=CC1=CN=NN1[C@H1]2CCC3=CC(OC)=C(OC)C(OC)=C3C4=CC=C(C(=O)C=C42)NCC	0.611181	0.612641	0.611111	0.615625	0.610973	0.612843	0.613084	0.611903	0.613707	0.613707	0.61442	0.612422	0.614764	0.619226	0.617978	0.613892	0.617061	0.61457	0.619701	0.615481	0.617866	0.609276	0.609181	0.609851	0.604577	0.616593	0.61625	0.616055	0.625695	0.616729	0.619166	0.58473	0.621818	0.62123	0.620648	0.624851	0.615755	0.619448	0.664103	0.668237	0.669281	0.919548	0.903598	0.899932	0.912088	0.911401	0.909091	0.905571
38	C1=NCCC1NC[C@@H1]2C3=CC(C(SC)=CC=C3C4=C(OC)C(OC)=C(C=C4CC2)OC=O)NC(=O)C	0.478336	0.482699	0.485006	0.486455	0.485023	0.488466	0.486191	0.493379	0.486766	0.486766	0.4824	0.489362	0.494246	0.489925	0.488774	0.482997	0.48908	0.486782	0.489655	0.486471	0.499712	0.476914	0.484796	0.45167	0.473376	0.490128	0.492192	0.495958	0.506598	0.496236	0.499711	0.470554	0.511036	0.510986	0.515186	0.528587	0.514689	0.518331	0.487651	0.453851	0.473684	0.5342	0.548423	0.549171	0.548495	0.549665	0.549194	0.549834
39	C1=NCC(F)=CC=C1CN[C@H1]2CCC3=CC(OC)=C(OC)C(OC)=C3C4=CC=C(C(=O)C=C24)SCC	0.884438	0.893683	0.890937	0.891104	0.888889	0.891188	0.885496	0.882398	0.884821	0.884821	0.854985	0.845753	0.841364	0.848394	0.848281	0.85241	0.846498	0.850411	0.84862	0.878995	0.877074	0.78155	0.867925	0.822034	0.784125	0.772399	0.768459	0.766215	0.746352	0.765	0.763494	0.836981	0.83429	0.829772	0.82661	0.807746	0.835597	0.832978	0.766762	0.717613	0.702797	0.633794	0.629248	0.630909	0.635973	0.637369	0.627511	0.630844
40	OC1=CC=C(C=C1)CN[C@H1]2CCC3=C(C(OC)=C(OC)C(OC)=C3)C4=CC=C(SC)C(=O)C=C24	0.950169	0.947148	0.94398	0.940833	0.941618	0.939268	0.937708	0.929218	0.936929	0.936929	0.997416	0.976351	0.973928	0.986406	0.988085	0.993991	0.978867	0.982188	0.978041	0.9401	0.918434	0.833333	0.927453	0.919035	0.837925	0.815047	0.806202	0.800769	0.78781	0.807901	0.801843	0.893652	0.87017	0.862175	0.854325	0.838901	0.87	0.8627	0.801386	0.782678	0.748858	0.635036	0.623964	0.622618	0.633075	0.630323	0.622123	0.623567
41	OC1=CC=C(C=C1)CN[C@H1]2CCC3=CC(OC)=C(OC)C(OC)=C3C4=CC=C(C(C=C42)=O)SCC	0.941472	0.938538	0.93543	0.932343	0.933113	0.930807	0.929276	0.920945	0.928513	0.928513	0.986371	0.965748	0.965029	0.97563	0.977273	0.983022	0.968227	0.97479	0.969064	0.931631	0.911884	0.826156	0.919184	0.908859	0.830658	0.812451	0.803695	0.798319	0.782836	0.805385	0.79939	0.885714	0.865798	0.857903	0.850151	0.836283	0.865649	0.858441	0.797555	0.777424	0.744151	0.634983	0.625	0.623656	0.634084	0.633441	0.624204	0.624604
42	O=CC1=C[C@H1](CCC=C2C(OC)=C(OC)C(OC(C)=O)=C2C1=CC=C(SC)C=O)CC=O	0.348635	0.350216	0.351018	0.350154	0.352869	0.35305	0.354282	0.356047	0.354898	0.354898	0.348148	0.351931	0.354562	0.350705	0.350307	0.348121	0.351716	0.35258	0.353988	0.357849	0.35348	0.343789	0.352363	0.330579	0.341509	0.356343	0.360818	0.363412	0.372321	0.360767	0.365658	0.341191	0.368263	0.372162	0.374405	0.386619	0.372385	0.377313	0.351103	0.329936	0.351031	0.378107	0.388377	0.39023	0.388051	0.387471	0.390046	0.385763
43	OC1=CC=C(C=C1)CN[C@H1]2CCC3=CC(OC)=C(OC)C(OC)=C3C4=CC=C(SC)C(=O)C=C42	0.950169	0.947148	0.94398	0.940833	0.941618	0.939268	0.937708	0.929218	0.936929	0.936929	0.997416	0.976351	0.973928	0.986406	0.988085	0.993991	0.978867	0.982188	0.978041	0.9401	0.918434	0.833333	0.927453	0.919035	0.837925	0.815047	0.806202	0.800769	0.78781	0.807901	0.801843	0.893652	0.87017	0.862175	0.854325	0.838901	0.87	0.8627	0.801386	0.782678	0.748858	0.635036	0.623964	0.622618	0.633075	0.630323	0.622123	0.623567
44	OC1=CC=C(C=C1)CN[C@H1]2CCC3=C(C(OC)=C(OC)C(OC)=C3)C4=CC=C(SC)C(C=C24)=O	0.950169	0.947148	0.94398	0.940833	0.941618	0.939268	0.937708	0.929218	0.936929	0.936929	0.997416	0.976351	0.973928	0.986406	0.988085	0.993991	0.978867	0.982188	0.978041	0.9401	0.918434	0.833333	0.927453	0.919035	0.837925	0.815047	0.806202	0.800769	0.78781	0.807901	0.801843	0.893652	0.87017	0.862175	0.854325	0.838901	0.87	0.8627	0.801386	0.782678	0.748858	0.635036	0.623964	0.622618	0.633075	0.630323	0.622123	0.623567
45	OC1=CC=C(C=C1)CN[C@H1]2CCC3=C(C(OC)=C(OC)C(OC)=C3)C4=CC=C(SC)C(=O)C=C42	0.950169	0.947148	0.94398	0.940833	0.941618	0.939268	0.937708	0.929218	0.936929	0.936929	0.997416	0.976351	0.973928	0.986406	0.988085	0.993991	0.978867	0.982188	0.978041	0.9401	0.918434	0.833333	0.927453	0.919035	0.837925	0.815047	0.806202	0.800769	0.78781	0.807901	0.801843	0.893652	0.87017	0.862175	0.854325	0.838901	0.87	0.8627	0.801386	0.782678	0.748858	0.635036	0.623964	0.622618	0.633075	0.630323	0.622123	0.623567
46	OC1=CC=C(C=C1)CN[C@H1]2CCC3=CC(OC)=C(OC)C(OC)=C3C4=CC=C(SC)C(=O)C=C24	0.950169	0.947148	0.94398	0.940833	0.941618	0.939268	0.937708	0.929218	0.936929	0.936929	0.997416	0.976351	0.973928	0.986406	0.988085	0.993991	0.978867	0.982188	0.978041	0.9401	0.918434	0.833333	0.927453	0.919035	0.837925	0.815047	0.806202	0.800769	0.78781	0.807901	0.801843	0.893652	0.87017	0.862175	0.854325	0.838901	0.87	0.8627	0.801386	0.782678	0.748858	0.635036	0.623964	0.622618	0.633075	0.630323	0.622123	0.623567
47	O=CC1=C2[C@H1](CCC3=CC(OC)=C(OC)C(OC(=O)C)=C3C1=CC=C(SC)C2=O)CC=O	0.682712	0.682861	0.68556	0.683715	0.686446	0.687332	0.685272	0.688129	0.684812	0.684812	0.678114	0.676451	0.677763	0.675117	0.6749	0.676293	0.672655	0.677807	0.67555	0.681208	0.677741	0.621443	0.680723	0.679021	0.625166	0.640738	0.641311	0.642064	0.637123	0.6311	0.629366	0.655496	0.735609	0.732048	0.731966	0.698718	0.699739	0.69585	0.622337	0.611298	0.617147	0.621771	0.627392	0.630981	0.632024	0.632406	0.628606	0.628965
48	O=CC1=C2[C@H1](CCC3=CC(OC)=C(OC)C(=C3C2=CC=C(SC)C1=O)OCC4=CC=CC=C4)ONC	0.684456	0.685714	0.685013	0.682089	0.684768	0.682299	0.684732	0.680893	0.685393	0.685393	0.684385	0.684904	0.681759	0.685809	0.685601	0.683687	0.681131	0.682927	0.682895	0.6863	0.682831	0.619883	0.676953	0.68088	0.620352	0.623077	0.623724	0.623492	0.652008	0.627313	0.626667	0.652202	0.668354	0.669609	0.668758	0.715287	0.676377	0.675914	0.626989	0.621676	0.626132	0.641151	0.642305	0.640995	0.64213	0.643499	0.63869	0.641924
49	COC1=CC=C(C(OC)=C1OC)C2=CC=C(SC)C(C=C2[C@@H1]NC(N(COC)C)=C)=CNC=O	0.4599	0.4601	0.459863	0.459627	0.459006	0.46087	0.459392	0.462585	0.460012	0.460012	0.457944	0.461015	0.467162	0.462492	0.463066	0.457711	0.462539	0.461872	0.461348	0.464219	0.476665	0.456274	0.4634	0.444444	0.455181	0.464286	0.464798	0.46617	0.465159	0.463642	0.463822	0.45603	0.474924	0.475933	0.477818	0.477232	0.472673	0.473086	0.463732	0.446809	0.453008	0.486244	0.496214	0.497093	0.499412	0.496183	0.498535	0.496797
50	C1=CCC2[C@H1](N3C(C(OCC)=O)=C(N=N3)C=CC(=O)C4NC)CC=CC=C4C2=C(OC)C(OC)=C1OCNC=O	0.484586	0.487858	0.489213	0.492175	0.490831	0.492449	0.493528	0.497845	0.494067	0.494067	0.492416	0.49973	0.498654	0.497032	0.497569	0.494583	0.49946	0.4973	0.499191	0.493794	0.502155	0.468868	0.493807	0.456534	0.465583	0.484358	0.488698	0.492208	0.511828	0.493261	0.496503	0.478096	0.520767	0.524721	0.528662	0.546999	0.527437	0.530851	0.49892	0.459385	0.490731	0.535204	0.570526	0.573684	0.564942	0.56524	0.565561	0.568576
51	C1OC2=CC=C(C(OC)=C2OC)C3=CC=C(SC)C1(C=C3[C@@H1](NC(N(CC)CC)=O)CC=C)NC=O	0.488662	0.491238	0.492655	0.494071	0.493506	0.496045	0.494642	0.5	0.495206	0.495206	0.488425	0.494376	0.500845	0.496618	0.494648	0.489002	0.495779	0.491849	0.49382	0.495765	0.506208	0.483982	0.5	0.46517	0.482225	0.498577	0.503977	0.508513	0.512072	0.501133	0.502822	0.486917	0.530761	0.53404	0.539019	0.536854	0.524972	0.52684	0.506236	0.472464	0.487486	0.545	0.565574	0.56714	0.564046	0.562637	0.566411	0.563557
52	CC1=CC=C(SC)C(C=C1[C@@H1](NC(=O)C)CCC=CC(OC)=C(OC)C(OC=CCOC)=C)=O	0.440569	0.442948	0.444759	0.440451	0.444837	0.443896	0.444288	0.441877	0.443975	0.443975	0.43038	0.426093	0.427978	0.430662	0.431263	0.43118	0.430759	0.433962	0.426491	0.446643	0.439415	0.396914	0.453966	0.407971	0.397463	0.40069	0.399726	0.399592	0.404298	0.39959	0.402995	0.454808	0.457338	0.45856	0.457799	0.44782	0.45098	0.454484	0.399864	0.350523	0.353732	0.350062	0.363253	0.364402	0.363526	0.363747	0.359903	0.362214
53	C1C2=CC=C(SC)C(C=C2[C@@H1](NC(C)=O)CCC=CC(OC)=C(OC)C(OC(=O)C=C)C1)SC=O	0.368742	0.371046	0.373479	0.37174	0.375304	0.374621	0.378345	0.378329	0.378954	0.378954	0.372334	0.379248	0.378476	0.376364	0.375152	0.373934	0.377347	0.376592	0.378788	0.376063	0.378998	0.361676	0.37553	0.347257	0.361163	0.373855	0.377358	0.379018	0.386787	0.38316	0.387097	0.361416	0.392308	0.396104	0.399058	0.401978	0.393868	0.397881	0.376741	0.345818	0.360366	0.396853	0.41287	0.413068	0.412744	0.409742	0.412236	0.411832
55	CC1=C2C=C(SC)C(C=C1[C@@H1](NC(=O)C)CCC=CC(OC)=C(OC)C(OC=CCOC)=C2)=O	0.493875	0.497749	0.499357	0.496159	0.500321	0.498398	0.49968	0.500957	0.49936	0.49936	0.490711	0.489848	0.49145	0.494268	0.494898	0.492318	0.495226	0.494583	0.490171	0.50289	0.507987	0.449873	0.506744	0.45953	0.450605	0.45614	0.456698	0.459913	0.464373	0.456468	0.462112	0.501629	0.522257	0.524047	0.526775	0.513398	0.513966	0.519851	0.460199	0.411132	0.419077	0.443925	0.464756	0.466514	0.462514	0.461938	0.459289	0.463652
57	CCOC(OC1=C2CC([C@H1](CCC2=CC(OC)=C1OC)NC(C)=O)=CC(C(SC)=CC)=O)SC	0.451754	0.454716	0.456305	0.457891	0.457268	0.458229	0.458567	0.464508	0.45919	0.45919	0.450748	0.45387	0.459108	0.457143	0.455901	0.449627	0.454489	0.454715	0.456913	0.457944	0.459493	0.448035	0.458048	0.435173	0.446917	0.454318	0.45398	0.454489	0.467077	0.46375	0.47125	0.450598	0.469734	0.468995	0.470024	0.483582	0.485384	0.491175	0.455673	0.431964	0.443957	0.477585	0.485183	0.486079	0.490012	0.487676	0.487434	0.487493
58	CCOC(OC1=CC=CC2=C(OC)C(OC)=C(OC)C=C2CC[C@@H1](C=CC1=O)NC(C)=O)SSC=O	0.441738	0.442988	0.443717	0.445389	0.442848	0.445752	0.444227	0.447625	0.444879	0.444879	0.439791	0.444083	0.44394	0.444661	0.4443	0.440523	0.441921	0.441196	0.441634	0.446405	0.454723	0.452221	0.448433	0.427894	0.452027	0.454967	0.455563	0.457049	0.462735	0.461082	0.462246	0.44143	0.45082	0.453803	0.456767	0.459158	0.455919	0.456426	0.451634	0.428377	0.438284	0.439533	0.44842	0.448543	0.453832	0.451477	0.452252	0.449016
59	OC(NC(=O)OC)C=CC=C1C2=C(OC)C(OC)=C(OC)C=C2CC[C@@H1](C1=CC=O)NC(C)=O	0.453999	0.456835	0.457485	0.45988	0.457536	0.460203	0.458781	0.464478	0.459379	0.459379	0.454763	0.460346	0.463647	0.461768	0.460573	0.455416	0.460072	0.457688	0.459797	0.460802	0.472771	0.461115	0.462642	0.432863	0.459177	0.469697	0.469277	0.469706	0.485356	0.470801	0.471823	0.449398	0.482415	0.482497	0.484302	0.495662	0.482779	0.484002	0.466467	0.435077	0.45	0.493326	0.510517	0.512209	0.512041	0.511468	0.51373	0.511945
60	O1C(OC(=O)OC)=CC=C2C([C@@H1](NC(C)=O)CCC3=CC(OC)=C(OC)C(OC)=C32)=CC1NC	0.470317	0.474684	0.475287	0.478436	0.475316	0.478736	0.476491	0.482798	0.477064	0.477064	0.474381	0.478809	0.484518	0.481907	0.481609	0.474986	0.481928	0.477937	0.479107	0.47931	0.489093	0.473099	0.479358	0.442757	0.470416	0.482039	0.482421	0.484483	0.498569	0.488157	0.490783	0.469329	0.499718	0.49972	0.503078	0.516453	0.508465	0.511261	0.485616	0.447446	0.465666	0.513423	0.536344	0.5388	0.533776	0.529834	0.534511	0.536048
61	OC(NCCOCOC1)[C@@H1]C2=CC(C(NC)=CC=C2C3=C(OC)C(OC)=C(OC)C=C3CC1)=O	0.653961	0.655506	0.653561	0.6553	0.65211	0.65433	0.652142	0.650514	0.651661	0.651661	0.65156	0.643956	0.644266	0.650957	0.651917	0.64963	0.645894	0.645374	0.649046	0.668657	0.649123	0.657295	0.646109	0.676101	0.656751	0.650558	0.649926	0.647102	0.630901	0.640762	0.642336	0.618382	0.625175	0.624478	0.620428	0.618627	0.620402	0.623529	0.728814	0.773978	0.744849	0.702372	0.672578	0.672109	0.681881	0.677709	0.67536	0.67212
62	C1[C@H1](CCC2=CC(OC)=C(OC)C(OC)=C2C1=CC=C(OC(OC)=O)C=O)CSCNC(=O)C	0.42268	0.424904	0.425641	0.426376	0.42665	0.427657	0.428023	0.430485	0.428663	0.428663	0.42362	0.429757	0.430573	0.425749	0.427203	0.424359	0.427661	0.42693	0.427389	0.424649	0.441101	0.442971	0.432138	0.414229	0.440824	0.447712	0.449285	0.450777	0.455534	0.45	0.451196	0.425049	0.44486	0.44603	0.448084	0.452323	0.443618	0.445062	0.439871	0.422252	0.42755	0.45326	0.465269	0.466228	0.46558	0.462327	0.464823	0.466747
63	C=1=C2C(C3=C(OC)C(OC)=C(OC)C=C3CC[C@@H1]2NC(C)=O)C=C(OC(CC)=O)C(C=1)=O	0.478312	0.483607	0.485079	0.48655	0.486834	0.487719	0.488889	0.492703	0.489474	0.489474	0.480702	0.48863	0.490105	0.484866	0.483702	0.47958	0.485748	0.486014	0.485465	0.485698	0.487819	0.481261	0.486597	0.459928	0.478546	0.492916	0.495003	0.498826	0.50174	0.495596	0.5	0.472141	0.508883	0.511429	0.515687	0.521493	0.513452	0.51801	0.48863	0.45781	0.477059	0.511575	0.534742	0.538077	0.528723	0.527313	0.530328	0.532741
64	N([C@H1]1CCC=C(C(OC)=C(OC)C(OC)=C1C2=CC=C(SC)CC=C2)OC3=CC)=NC=C3	0.377242	0.377846	0.378611	0.379374	0.379607	0.380602	0.380982	0.381796	0.381595	0.381595	0.380864	0.384427	0.386169	0.3832	0.383671	0.383333	0.38674	0.385135	0.387354	0.386322	0.384991	0.368454	0.378131	0.356511	0.367104	0.379012	0.383385	0.38504	0.393682	0.382443	0.385557	0.36644	0.393325	0.39881	0.400119	0.407995	0.396552	0.400593	0.38783	0.364563	0.379826	0.40531	0.418056	0.42069	0.417149	0.41657	0.417436	0.417816
65	OC(N1CCOC12)[C@@H1]C3=CC(C(NC)=CC=C3C4=C(OC)C(OC)=C(OC)C=C4CC2)=O	0.649543	0.652174	0.65035	0.650838	0.648988	0.64993	0.650174	0.647507	0.649721	0.649721	0.642708	0.637931	0.638239	0.645631	0.645385	0.640919	0.643154	0.639254	0.641575	0.664557	0.646207	0.649073	0.646773	0.65424	0.648533	0.645206	0.644645	0.64657	0.635685	0.639446	0.642069	0.62057	0.635576	0.635942	0.636304	0.635417	0.633113	0.636063	0.714801	0.727621	0.710411	0.681696	0.668605	0.66817	0.671885	0.667969	0.665803	0.67141
66	C1[C@H1](CCC2=CC(OC)=C(OC)C(OC)=C2C1=CC=C(SC)CC)ONC(C)=O	0.424042	0.426316	0.428008	0.426885	0.428102	0.429134	0.429508	0.431091	0.430164	0.430164	0.424063	0.427546	0.428385	0.42531	0.425865	0.424819	0.426336	0.426519	0.423277	0.42979	0.440079	0.426461	0.423453	0.412526	0.424242	0.43245	0.43318	0.433814	0.433269	0.429227	0.430528	0.418928	0.436629	0.437855	0.43907	0.440794	0.433606	0.434211	0.427546	0.417808	0.425249	0.446183	0.450636	0.450755	0.456162	0.453766	0.453659	0.453883
67	C1=2[C@H1](CCC3=CC(OC)=C(OC)C(OC)=C3C1=CC=C(SC)C(=O)C=2)NC(C)CC=CSC	0.952697	0.962656	0.961093	0.956307	0.958712	0.957955	0.95477	0.94621	0.953985	0.953985	0.919578	0.904153	0.900636	0.908654	0.910112	0.918152	0.909528	0.907853	0.90423	0.942764	0.924498	0.836234	0.930308	0.885477	0.842231	0.820988	0.812214	0.806818	0.789941	0.809741	0.8065	0.897083	0.880916	0.87292	0.866467	0.84149	0.875	0.870579	0.806061	0.757364	0.732249	0.63175	0.623043	0.622736	0.630945	0.627215	0.619197	0.624687
68	C1[C@@H1](C2=CCC(SC)=CC=C2C3=C(OC)C(OC)=C(OC)C=C3C1)ONC(C)=O	0.455148	0.458859	0.460384	0.460156	0.460432	0.46223	0.461677	0.466507	0.462275	0.462275	0.461168	0.466747	0.468301	0.465548	0.465228	0.461816	0.469988	0.464949	0.46356	0.463707	0.473054	0.454268	0.458557	0.434889	0.452323	0.465538	0.468675	0.469988	0.476813	0.465786	0.467703	0.451418	0.475773	0.478463	0.481138	0.489055	0.475305	0.476549	0.461493	0.438889	0.452899	0.497962	0.508234	0.50907	0.512335	0.510029	0.510565	0.510517
69	N([C@H1]1CC2C=C(C(OC)=C(OC)C(OC)=C1C3=CC=C(SC)CC=C23)OC=CC)=NC=C	0.387116	0.387657	0.38839	0.390784	0.390186	0.391981	0.393178	0.395585	0.393776	0.393776	0.392298	0.396531	0.399044	0.395335	0.395808	0.394705	0.397129	0.397244	0.398564	0.396759	0.395363	0.374471	0.389518	0.367159	0.372347	0.383832	0.38806	0.389649	0.404621	0.390448	0.393452	0.37575	0.404887	0.410227	0.411458	0.423143	0.411286	0.415215	0.389881	0.365764	0.383826	0.423856	0.438348	0.441742	0.43597	0.436219	0.437003	0.438101
70	C1N(C(=S)N[C@@H1]2C3=CC(C(NC)=CC=C3C4=C(OC)C(OC)=C(OC)C=C4CC2)=O)C=C1	0.774742	0.767936	0.765693	0.764749	0.765306	0.76492	0.765091	0.760289	0.764535	0.764535	0.765179	0.759942	0.756115	0.763597	0.763425	0.762947	0.763215	0.759045	0.761388	0.768222	0.762248	0.784048	0.768727	0.744553	0.786687	0.779911	0.775824	0.773489	0.751773	0.77097	0.769398	0.738909	0.747047	0.742069	0.739548	0.730148	0.743785	0.744154	0.869432	0.846215	0.813495	0.681788	0.668983	0.667506	0.672194	0.668364	0.66519	0.665406
71	C=1=CC(C(C=C2[C@H1](CCC3=C(C(OC)=C(OC)C(OC)=C3)C2=1)SC(C)=O)C)=O	0.465916	0.468676	0.470171	0.469929	0.471943	0.472845	0.473156	0.477032	0.473746	0.473746	0.468362	0.473808	0.47619	0.474367	0.474926	0.469858	0.472663	0.473777	0.474118	0.472566	0.473931	0.465186	0.46831	0.447066	0.461538	0.473559	0.477488	0.479622	0.493239	0.477232	0.479081	0.457075	0.488479	0.491097	0.494556	0.509143	0.493096	0.495123	0.466901	0.44579	0.459395	0.510345	0.529611	0.532131	0.529545	0.528977	0.532048	0.532768
74	C1=CC=C(S1C)C2=CN(NC2)[C@H1]C3C4C5=CC(OC)=C(OC)C(OC)=C5C=CC=C(NC)C(=O)C=C34	0.486941	0.489583	0.491898	0.493349	0.491908	0.49537	0.493934	0.499423	0.494512	0.494512	0.490151	0.497113	0.502022	0.496823	0.494804	0.490741	0.496826	0.495381	0.494816	0.49422	0.504042	0.489988	0.495095	0.466312	0.488194	0.501461	0.504368	0.507263	0.515274	0.507576	0.511926	0.485149	0.52221	0.522972	0.526316	0.528555	0.523269	0.526912	0.497978	0.468565	0.486597	0.524691	0.543251	0.544854	0.538164	0.538462	0.538886	0.546358
75	OC=C(OC)C=C1C(C2=CC=C(SC)C(C=C2[C@H1](CC1)NC(C)=O)OCC(=O)OCS)C=O	0.35674	0.356608	0.359102	0.358209	0.360973	0.361994	0.36409	0.366687	0.364713	0.364713	0.357901	0.363354	0.362624	0.361266	0.360025	0.358702	0.361438	0.362337	0.362903	0.363466	0.366563	0.347661	0.364655	0.340412	0.347081	0.361982	0.364772	0.368224	0.374615	0.366417	0.368781	0.35091	0.376286	0.376881	0.380781	0.394737	0.380435	0.382902	0.363354	0.338055	0.354088	0.378716	0.39547	0.398143	0.389504	0.392168	0.393939	0.393623
76	C1=2[C@H1](CCC3=CC(OC)=C(OC)C(OC)=C3C1=CC=C(C(C=2)=O)SCNC(C)=O)C	0.799673	0.793355	0.792239	0.788245	0.790323	0.788415	0.787149	0.783094	0.786517	0.786517	0.784504	0.772836	0.771361	0.775478	0.775299	0.781979	0.77504	0.776096	0.77161	0.784912	0.77954	0.705189	0.789727	0.840278	0.710214	0.694551	0.68845	0.685283	0.681245	0.692776	0.689057	0.759646	0.751515	0.744745	0.740686	0.734261	0.755858	0.750938	0.683258	0.713938	0.689815	0.636111	0.616965	0.619868	0.623072	0.62349	0.616101	0.616556
77	C1[C@H1](C2=CCC(SC)=CC=C2C3=C(OC)C(OC)=C(OC)C=C3C1=O)C=O	0.448113	0.450911	0.452409	0.453052	0.452465	0.455079	0.453693	0.459285	0.454279	0.454279	0.450588	0.457796	0.45848	0.45577	0.454599	0.451234	0.459238	0.454333	0.454705	0.457378	0.466549	0.454109	0.454067	0.427284	0.452195	0.468694	0.471777	0.475682	0.480634	0.470658	0.473404	0.443591	0.477835	0.478784	0.483114	0.491757	0.476518	0.47774	0.460364	0.434625	0.453627	0.508377	0.526048	0.527715	0.524217	0.525385	0.526735	0.526614
78	C1=CC2=C(S1C)C(=O)C3=C[C@H1](CCC4=C(C(OC)=C(OC)C(OC)=C4)C23)NCSC	0.493197	0.497453	0.499717	0.501131	0.500566	0.503113	0.502544	0.507058	0.503109	0.503109	0.496321	0.502255	0.508752	0.502822	0.501693	0.496891	0.501126	0.50141	0.50678	0.501979	0.503088	0.484313	0.500282	0.472318	0.481714	0.498015	0.501697	0.505364	0.511472	0.506516	0.511602	0.489773	0.527546	0.532518	0.535774	0.53956	0.534521	0.539789	0.502255	0.473684	0.494587	0.550306	0.57511	0.577534	0.572767	0.570485	0.571664	0.575658
79	C1[C@H1](CCC2=CC(OC)=C(OC)C(OC(=O)CC)=C2C1=CC=C(SC)C(=O)CNC)SC	0.452546	0.455514	0.457107	0.456875	0.458073	0.459037	0.459375	0.461682	0.46	0.46	0.450625	0.455562	0.458101	0.452514	0.45398	0.451311	0.451673	0.455507	0.453193	0.456929	0.467581	0.452518	0.452514	0.430404	0.450479	0.470812	0.47782	0.477301	0.468808	0.461827	0.462928	0.443189	0.495062	0.501542	0.501535	0.485321	0.476335	0.476737	0.456468	0.436411	0.444724	0.488232	0.498237	0.49912	0.498815	0.498223	0.497052	0.498825
80	C1[C@@H1](C2=CC(C(SC)=CC=C2C3=C(OC)C(OC)=C(OC)C=C3CCNCC)=O)C1SC=O	0.737003	0.739528	0.737282	0.736364	0.736922	0.733938	0.73545	0.731982	0.734894	0.734894	0.731411	0.731579	0.723881	0.726182	0.727273	0.729198	0.725843	0.725431	0.721434	0.749238	0.723753	0.653137	0.727477	0.761254	0.655045	0.647867	0.646088	0.643367	0.641404	0.643062	0.639915	0.699248	0.709469	0.708274	0.704674	0.694444	0.700284	0.696051	0.641483	0.657316	0.637219	0.618	0.610648	0.610365	0.611255	0.61165	0.609788	0.608195
81	C[C@H1](CCC1=CC(OC)=C(OC)C(OC(OCC)=O)=C1C2=CC=C(SC)C(=O)C=C2)NC	0.696133	0.690923	0.692729	0.686625	0.691108	0.692128	0.689736	0.683886	0.6892	0.6892	0.692006	0.682099	0.6849	0.690994	0.690754	0.689844	0.68417	0.68629	0.684942	0.687646	0.683564	0.633488	0.683153	0.721898	0.636646	0.630862	0.626687	0.625186	0.619883	0.651976	0.661094	0.659161	0.6828	0.676753	0.674487	0.669308	0.753668	0.762162	0.612426	0.638602	0.616024	0.583505	0.567958	0.568807	0.569251	0.572757	0.565876	0.567585
82	C1[C@H1](CCC2=CC(OC)=C(OC)C(OC)=C2C3=CC=C(C(C=C3)=O)SCNCC)OC1	0.70768	0.700736	0.699837	0.696182	0.699511	0.697807	0.696675	0.690514	0.69611	0.69611	0.696327	0.685944	0.6848	0.688406	0.688155	0.69406	0.689461	0.686243	0.684844	0.694489	0.6888	0.63141	0.69523	0.747581	0.635997	0.622361	0.615623	0.614143	0.608892	0.613724	0.611792	0.670187	0.658295	0.652338	0.650187	0.64291	0.655329	0.652402	0.615858	0.658577	0.633836	0.584462	0.558784	0.559676	0.564295	0.566827	0.560843	0.557355
84	C[C@H1]1CCC2=CC(OC)=C(OC)C(OC)=C2C3=CC=C(C(=O)C=C31)SCNC(C)=O	0.799673	0.793355	0.792239	0.788245	0.790323	0.788415	0.787149	0.783094	0.786517	0.786517	0.784504	0.772836	0.771361	0.775478	0.775299	0.781979	0.77504	0.776096	0.77161	0.784912	0.77954	0.705189	0.789727	0.840278	0.710214	0.694551	0.68845	0.685283	0.681245	0.692776	0.689057	0.759646	0.751515	0.744745	0.740686	0.734261	0.755858	0.750938	0.683258	0.713938	0.689815	0.636111	0.616965	0.619868	0.623072	0.62349	0.616101	0.616556
86	C=CC=1C(=CCC(OC(C(C)C=2)=O)=CC=1OC(NCC=2)C)CC=C(OC3)C(OC)=CC(C)=C3NCNC	0.367347	0.369759	0.371429	0.371356	0.372462	0.373494	0.373891	0.374763	0.374525	0.374525	0.365885	0.368785	0.368025	0.367527	0.36799	0.364959	0.372005	0.369483	0.370907	0.373257	0.374607	0.366106	0.36925	0.346606	0.362929	0.380616	0.382503	0.387755	0.392317	0.381529	0.383006	0.358827	0.384285	0.385697	0.389634	0.400363	0.391037	0.393513	0.373973	0.353057	0.362939	0.389124	0.397654	0.399531	0.395747	0.395157	0.397761	0.394152
87	C12=CC=3C(=CCC(OC(C(C)C)=O)=CC=3OC([C@@H1]N)C=C)C=CC=C1SC=CC(OC)=C2OC	0.466748	0.472273	0.473812	0.47535	0.473844	0.477467	0.475091	0.479078	0.475699	0.475699	0.471951	0.476653	0.475529	0.476335	0.474227	0.472594	0.476364	0.473939	0.477865	0.472694	0.475875	0.458795	0.470979	0.446451	0.458642	0.469226	0.469697	0.475469	0.482304	0.47123	0.474924	0.454103	0.484652	0.483852	0.490023	0.503214	0.493791	0.496755	0.465102	0.438858	0.452945	0.492999	0.508562	0.509402	0.507471	0.505166	0.51004	0.508272
88	C1[C@H1](CCC2=CC(OC)=C(OC)C(OC(CC)=O)=C2C1=CC=C(SC)C(=O)CNC)SC	0.452546	0.455514	0.457107	0.456875	0.458073	0.459037	0.459375	0.461682	0.46	0.46	0.450625	0.455562	0.458101	0.452514	0.45398	0.451311	0.451673	0.455507	0.453193	0.456929	0.467581	0.452518	0.452514	0.430404	0.450479	0.470812	0.47782	0.477301	0.468808	0.461827	0.462928	0.443189	0.495062	0.501542	0.501535	0.485321	0.476335	0.476737	0.456468	0.436411	0.444724	0.488232	0.498237	0.49912	0.498815	0.498223	0.497052	0.498825
89	C1=CC=2C(=CCC(OC(C3=CC=CC4=C3)=O)=CC=2O[C@H1]CCC1)NC=C(OC)C4OC	0.412718	0.414907	0.415633	0.412855	0.416615	0.414966	0.417957	0.416	0.417698	0.417698	0.418069	0.419654	0.424861	0.421933	0.422457	0.418793	0.42115	0.42396	0.420012	0.419975	0.426189	0.412137	0.416667	0.397953	0.410013	0.425972	0.429375	0.429104	0.44727	0.430981	0.432214	0.398263	0.428486	0.430539	0.431723	0.44881	0.435959	0.436527	0.416153	0.396541	0.410256	0.442789	0.453016	0.453966	0.452367	0.448397	0.452533	0.451071
93	COC1=C2C3=CC=C(NC)C(=O)C=C3[C@H1](CCC2=CC(OC)=C1OC)NCCC4=CC=CC=C4	0.844073	0.841897	0.839243	0.83805	0.837264	0.836735	0.836863	0.831128	0.836207	0.836207	0.813084	0.798622	0.797101	0.806774	0.806626	0.810559	0.804916	0.806005	0.807071	0.862371	0.821759	0.858537	0.826459	0.781051	0.860294	0.840855	0.83595	0.830218	0.813688	0.82904	0.824167	0.794553	0.783407	0.779155	0.77368	0.764372	0.77713	0.774801	0.9575	0.907692	0.863489	0.698489	0.677822	0.675163	0.686835	0.68505	0.678312	0.678478
94	C1=C2CC[C@H1](C3=CCC(NC)=CC=C3C2=C(OC)C(=C1OC)OC)ONCCCCCCC	0.450874	0.4546	0.455255	0.455909	0.456182	0.457109	0.459184	0.459653	0.459784	0.459784	0.456902	0.463385	0.465827	0.462185	0.461862	0.457556	0.464865	0.460708	0.458458	0.457708	0.466188	0.454378	0.453461	0.433148	0.452425	0.467477	0.467956	0.469277	0.474374	0.463297	0.46435	0.445383	0.472515	0.474359	0.477048	0.48415	0.469494	0.469907	0.462507	0.442511	0.458308	0.500879	0.511136	0.511973	0.513545	0.512097	0.513498	0.514302
95	COC1=C2C3=CC=C(NC)C(=O)C=C3[C@H1](CCC2=CC(OC)=C1OC)NC/C=C/C4=CC=CC=C4	0.829287	0.821567	0.819026	0.819305	0.81713	0.818042	0.816782	0.811306	0.816154	0.816154	0.793578	0.78238	0.778277	0.788956	0.788796	0.791159	0.78852	0.7882	0.786576	0.820216	0.86296	0.846154	0.812261	0.767241	0.849315	0.830469	0.824303	0.81874	0.801349	0.820355	0.816998	0.780843	0.771904	0.766523	0.762482	0.753501	0.769618	0.768625	0.94335	0.893939	0.854067	0.696866	0.677524	0.674886	0.685356	0.682477	0.675817	0.678176
98	CSC=1C(C=C2C(=CC=1)C3=C(OC)C(=C(OC)C=C3CC[C@@H1]2NCC)OO)C=O	0.465762	0.469376	0.470865	0.47322	0.470899	0.474397	0.472108	0.479436	0.472695	0.472695	0.466471	0.473623	0.477726	0.474178	0.473005	0.467098	0.473345	0.470141	0.471345	0.473251	0.485882	0.467665	0.471588	0.440048	0.465786	0.478622	0.481657	0.485529	0.496479	0.484024	0.485849	0.461266	0.493379	0.494266	0.498569	0.509681	0.495408	0.497424	0.477086	0.444846	0.456688	0.506568	0.52493	0.526581	0.523112	0.520833	0.524747	0.524636
100	CSC=1C(C=C2C(=CC=1)C3=C(OC)C(=C(OC)C=C3CC[C@@H1]2NCC)O)OC=O	0.473156	0.475882	0.478235	0.478848	0.478261	0.480894	0.47946	0.485915	0.480047	0.480047	0.473839	0.480961	0.484192	0.480657	0.479484	0.475323	0.481547	0.478337	0.477804	0.479742	0.493239	0.472521	0.478057	0.451051	0.469779	0.483412	0.485546	0.486772	0.498539	0.489663	0.492344	0.466077	0.499712	0.499714	0.502283	0.515065	0.504308	0.5063	0.481829	0.45241	0.468399	0.511111	0.529346	0.531844	0.527559	0.526138	0.528323	0.529905
101	CSC=1C(C=C2C(=CC=1)C3=C(OC)C=CC=C3CC[C@@H1]2NCN)COCOC=O	0.428999	0.431045	0.432578	0.434964	0.432658	0.436158	0.433929	0.441334	0.434524	0.434524	0.428145	0.433828	0.437982	0.436905	0.43486	0.428827	0.434421	0.43035	0.431616	0.435897	0.446961	0.431265	0.43605	0.407453	0.43014	0.442702	0.445045	0.449041	0.453468	0.444844	0.446834	0.427798	0.456243	0.456446	0.46087	0.467241	0.457558	0.458864	0.438095	0.410429	0.424115	0.48538	0.502003	0.503716	0.5	0.497699	0.500862	0.501716
102	CSCCC=C1C(C2=C(C=C(OC)C(OC)=C2OC)CC[C@@H1]1N=O)CC=O	0.432537	0.436574	0.438224	0.438946	0.439228	0.440231	0.441517	0.443022	0.442159	0.442159	0.435287	0.438619	0.444018	0.43826	0.43698	0.434168	0.440179	0.436701	0.438059	0.437179	0.432552	0.43222	0.435504	0.420598	0.429134	0.439845	0.439589	0.441101	0.442271	0.444945	0.44801	0.428479	0.446307	0.445679	0.447724	0.455488	0.453135	0.456347	0.428571	0.412583	0.426357	0.443161	0.454438	0.457126	0.458134	0.456665	0.452226	0.458482
105	CSC=1C(C=C2C(=CC=1)C3=C(OC)C(OC)=CC=C3CC[C@@H1]2NCC)=O	0.964286	0.95431	0.951031	0.947774	0.948586	0.946154	0.944539	0.935757	0.943734	0.943734	0.917866	0.898671	0.896609	0.903333	0.904841	0.914768	0.902662	0.905676	0.900332	0.945346	0.929471	0.834158	0.940527	0.893728	0.840399	0.815409	0.806349	0.800787	0.784781	0.803797	0.797647	0.908936	0.879269	0.870968	0.862822	0.841185	0.871654	0.864169	0.804262	0.753436	0.72218	0.606667	0.595649	0.594388	0.60441	0.601684	0.592688	0.596289
106	CSC=1C(C=C2C(=CC=1)C3=C(OC)C(OC)=C(C=C3CC[C@@H1]2NCC)OO)C=O	0.46886	0.47245	0.473931	0.476274	0.473961	0.477446	0.475161	0.482456	0.475745	0.475745	0.468695	0.476663	0.479883	0.476357	0.47519	0.469316	0.475524	0.473193	0.473531	0.476302	0.488876	0.472554	0.475496	0.440739	0.470694	0.483432	0.487316	0.491166	0.500292	0.488797	0.490599	0.466117	0.497133	0.498857	0.503137	0.512472	0.5	0.501997	0.480983	0.445509	0.458114	0.507666	0.526756	0.528396	0.524958	0.522689	0.527436	0.526462
107	COC=CC=1CC[C@H1](NC(C)=O)C2=CC(=O)C(SC)=CC=C2C=1C(O)=COC	0.495238	0.496207	0.498736	0.496534	0.500632	0.499685	0.500946	0.504091	0.500631	0.500631	0.489295	0.489388	0.490966	0.491865	0.491547	0.489937	0.490943	0.494044	0.48785	0.500315	0.51198	0.461006	0.508861	0.458627	0.461781	0.467081	0.46848	0.467117	0.48316	0.471861	0.474723	0.503851	0.518473	0.517453	0.517367	0.520796	0.524308	0.527317	0.47284	0.420789	0.435395	0.450867	0.468856	0.469757	0.465831	0.465262	0.465948	0.468591
108	C=1OC=CC2CC[C@H1](N)CCC3=CC(=C(OC)C=C3C2=CC=1OCS)C	0.398172	0.39961	0.401299	0.402075	0.403247	0.404283	0.405581	0.409061	0.40623	0.40623	0.39288	0.395633	0.400128	0.396141	0.395753	0.394567	0.395379	0.394602	0.392446	0.403111	0.416991	0.392739	0.39884	0.386945	0.391391	0.394549	0.39819	0.401676	0.407006	0.400776	0.401286	0.387622	0.407245	0.409459	0.412531	0.41198	0.408836	0.408669	0.397428	0.386379	0.400131	0.421411	0.430889	0.431914	0.431777	0.432039	0.432024	0.43494
109	C1OC2=CCCC[C@H1](N)C3=CC(=O)C(SC)=CC=C3C2C(OC)=C1OC	0.450598	0.451754	0.452441	0.453125	0.453408	0.455285	0.453808	0.457944	0.453525	0.453525	0.45506	0.457268	0.456184	0.454206	0.45568	0.456658	0.455168	0.459037	0.457606	0.456821	0.456576	0.413557	0.452396	0.443219	0.411471	0.419276	0.420892	0.423264	0.435835	0.427696	0.430666	0.443046	0.46247	0.466184	0.46988	0.4694	0.46824	0.470446	0.42439	0.408889	0.429283	0.435239	0.457045	0.457976	0.452244	0.448335	0.447429	0.455117
110	C1N2CC1(C=C3C(=O)C(NC)=CC=C3C=C(OC)C(OC)=C(OC)C=C)CC[C@@H1]2N=O	0.340111	0.344192	0.345823	0.347452	0.347666	0.349509	0.346601	0.353337	0.346389	0.346389	0.344615	0.351716	0.351863	0.349663	0.348438	0.344595	0.346553	0.351534	0.351285	0.349294	0.348328	0.33023	0.343083	0.32197	0.329595	0.343596	0.344764	0.345732	0.355502	0.347214	0.349603	0.334362	0.362336	0.364608	0.366056	0.379859	0.368076	0.370546	0.347587	0.324667	0.340768	0.366569	0.377854	0.379704	0.379827	0.377663	0.379449	0.378425
111	COC=C1CC=2C[C@H1](N)C3=CC(C(=CC=C3C=2C(OC)=C1O)CN)C=O	0.330299	0.330317	0.331181	0.332044	0.332258	0.334194	0.335484	0.335687	0.336129	0.336129	0.332469	0.333976	0.337612	0.334405	0.333977	0.332471	0.333761	0.33634	0.339562	0.338292	0.340822	0.320656	0.332691	0.317024	0.319079	0.329663	0.333548	0.336334	0.34244	0.337855	0.340412	0.318211	0.342253	0.343866	0.345466	0.359116	0.345748	0.348391	0.325463	0.309285	0.320571	0.338808	0.351271	0.35242	0.349017	0.350835	0.352766	0.348673
112	COC1=CC2CC[C@H1](N)C3=CC(=O)C(SC)=CC=C3C1C(OC)=C2OC	0.451204	0.45145	0.452141	0.453744	0.453115	0.455919	0.452605	0.458595	0.452321	0.452321	0.447451	0.449719	0.450467	0.446663	0.44722	0.448146	0.448534	0.453292	0.450062	0.455632	0.45995	0.413016	0.453008	0.441906	0.411802	0.418777	0.420406	0.42454	0.436319	0.42725	0.43024	0.442685	0.460462	0.464199	0.469697	0.470975	0.469835	0.472948	0.423053	0.406509	0.427945	0.429825	0.449284	0.450229	0.445276	0.443869	0.441328	0.448197
113	C=1SCC(C=C2C=1C3=C(CC[C@@H1]2NC(N)=O)C=C(OC)C(=C3OC)OC)SC=O	0.463357	0.466117	0.466745	0.468235	0.466784	0.469412	0.467998	0.472727	0.468585	0.468585	0.465802	0.471244	0.476218	0.473529	0.471487	0.466431	0.472695	0.469484	0.475015	0.468273	0.476553	0.46435	0.471798	0.442771	0.463341	0.472716	0.476641	0.477902	0.488005	0.475516	0.479976	0.461447	0.489349	0.495397	0.497133	0.498866	0.489679	0.493417	0.476443	0.445856	0.459443	0.505149	0.525281	0.52608	0.526048	0.522034	0.522523	0.5267
114	CSC=1C2(C=CC(=CC=1)C3=C(OC)C(OC)=CC=C3CC[C@@H1]2NOC)NC=O	0.455342	0.45979	0.462121	0.463599	0.462165	0.464764	0.463372	0.469767	0.463953	0.463953	0.458625	0.464037	0.468097	0.464576	0.462565	0.459255	0.46292	0.463995	0.462652	0.461941	0.472706	0.454492	0.464576	0.437426	0.452607	0.465416	0.471036	0.474022	0.478914	0.472515	0.476941	0.450029	0.484607	0.486364	0.490641	0.5	0.48664	0.490352	0.470006	0.443911	0.46	0.512279	0.530532	0.53132	0.526168	0.52991	0.529511	0.530235
115	CSC=1C(C2=CC(=CC=1)C3=C(OC)C(OC)=CC=C3CC[C@@H1]2NOC)NC=O	0.454545	0.458163	0.460503	0.461988	0.462259	0.463158	0.464327	0.47076	0.464912	0.464912	0.45614	0.463287	0.468222	0.46127	0.460956	0.457627	0.458769	0.460687	0.45935	0.461179	0.472855	0.453682	0.462974	0.433951	0.451786	0.465527	0.470312	0.474178	0.476522	0.47007	0.474517	0.449207	0.486517	0.48913	0.494286	0.496045	0.48941	0.493143	0.472727	0.445652	0.465282	0.505714	0.519843	0.521496	0.520563	0.521715	0.521348	0.522104
117	CC(=O)C(S1C2)CC(OC)=C(OC)C(O)=C2C=3C1=CC(C(SC)=CC=3)=O	0.471982	0.473805	0.475259	0.475014	0.476136	0.476163	0.476464	0.480229	0.477038	0.477038	0.472654	0.479633	0.481948	0.478485	0.476491	0.474957	0.47851	0.47876	0.479931	0.478436	0.48908	0.439359	0.478485	0.451176	0.439977	0.454183	0.459659	0.462585	0.469927	0.455317	0.458804	0.466744	0.497185	0.50225	0.505612	0.510567	0.497476	0.50112	0.462847	0.432228	0.445584	0.514286	0.538079	0.538843	0.532964	0.531561	0.534549	0.538631
118	CC(=O)C=C1C(C2=C(OC)C(OC)=C(OC)C=C2CC[C@@H1]1NCC)=O	0.4375	0.442393	0.443102	0.44381	0.444091	0.445079	0.444515	0.447818	0.445149	0.445149	0.440204	0.443462	0.450633	0.446768	0.444585	0.439086	0.445006	0.439748	0.442902	0.445714	0.442839	0.438188	0.441288	0.423984	0.437947	0.44843	0.448122	0.448669	0.459748	0.446984	0.448167	0.432588	0.456281	0.456495	0.458486	0.467879	0.454991	0.454601	0.439824	0.420708	0.43598	0.464438	0.467334	0.469136	0.472024	0.470553	0.470379	0.468787
119	CC(=O)N[C@H1]1CCC2=CC(OC)=C(OC)C(OC)=C2C=3C1=CC(=O)C(SC)=CC=3N	0.863807	0.856078	0.854911	0.851001	0.853007	0.851111	0.852593	0.848418	0.851962	0.851962	0.827333	0.816075	0.817197	0.822545	0.823744	0.826246	0.826055	0.825802	0.824128	0.858736	0.846154	0.804428	0.885628	0.802859	0.804444	0.792208	0.786838	0.784495	0.781513	0.784593	0.781715	0.854778	0.848571	0.842665	0.838142	0.825397	0.849822	0.847134	0.814761	0.731354	0.720865	0.639875	0.644068	0.64372	0.64591	0.646304	0.638401	0.643678
120	C1=2C(=O)C(=C3C=C1C4=C(CC[C@@H1]3NC(C)=O)C=C(OC)C(OC)=C4OC(OC)=O)C=2	0.626132	0.626529	0.628057	0.624359	0.627892	0.628773	0.626923	0.628754	0.627564	0.627564	0.621066	0.617928	0.620317	0.621811	0.62157	0.623635	0.620624	0.624281	0.623327	0.632561	0.632822	0.645889	0.640645	0.591236	0.647568	0.658553	0.655781	0.656474	0.674886	0.672596	0.672787	0.615236	0.664553	0.660579	0.661857	0.668948	0.700645	0.698973	0.640877	0.589005	0.599361	0.6088	0.620365	0.620082	0.618117	0.619443	0.616745	0.621908
121	C1C(=O)C(=C2C=C1C3=C(CC[C@@H1]2NC(C)=O)C=C(OC)C(OC)=C3OC(OC)=O)C	0.465875	0.469509	0.471006	0.471631	0.47104	0.472813	0.472255	0.477005	0.472845	0.472845	0.464855	0.471176	0.473561	0.472599	0.47142	0.465487	0.46831	0.468548	0.47322	0.473404	0.486982	0.466907	0.474336	0.445251	0.462372	0.476162	0.478338	0.480473	0.496755	0.494012	0.497611	0.45962	0.499709	0.502317	0.50491	0.519585	0.519343	0.522222	0.474646	0.443099	0.46369	0.506024	0.52191	0.522715	0.520068	0.520362	0.520857	0.524184
122	CC(=O)OC1=CC=C2C3=C(C(OC)=C(C=C3CC[C@@H1](C2=CC1=O)OC(=O)CO)CO)C	0.539617	0.538357	0.53794	0.535449	0.537889	0.536799	0.537112	0.534182	0.53675	0.53675	0.544338	0.546008	0.548649	0.545701	0.546441	0.542857	0.54251	0.542934	0.540067	0.543729	0.538513	0.559298	0.537374	0.540043	0.552982	0.586667	0.584262	0.582007	0.574627	0.570641	0.570254	0.537723	0.548788	0.546519	0.545278	0.542675	0.546875	0.54799	0.535618	0.539773	0.536301	0.550193	0.548447	0.546411	0.546592	0.548872	0.546417	0.546187
123	CC(=O)OC1=CC=C2C3=C(C(OC)=C(C=C3CC[C@@H1](C2=CC1=O)OC(=O)CO)CN)C(=O)COC	0.551833	0.552549	0.553111	0.552698	0.55402	0.552978	0.553258	0.554307	0.552912	0.552912	0.556187	0.559598	0.567925	0.560302	0.560025	0.555766	0.559248	0.559673	0.553059	0.558491	0.558328	0.572356	0.558344	0.544567	0.566515	0.597664	0.597419	0.596277	0.60127	0.588725	0.591315	0.549144	0.576167	0.574832	0.574468	0.582981	0.575183	0.578049	0.558621	0.544329	0.552732	0.571343	0.577283	0.577103	0.576651	0.576061	0.577307	0.575102
124	CC(=O)OC1=CC=C2C3=C(C(OC)=C(C=C3CC[C@@H1](C2=CC1=O)OC(=O)C)OC)NC(=O)C	0.54759	0.547355	0.546961	0.546569	0.546904	0.546846	0.548071	0.548171	0.548683	0.548683	0.54803	0.552358	0.549055	0.553035	0.552761	0.549538	0.553922	0.550521	0.552632	0.554121	0.552102	0.567533	0.553035	0.538413	0.561826	0.592264	0.592055	0.593966	0.597887	0.580625	0.582192	0.552648	0.577201	0.577778	0.58024	0.582938	0.573397	0.57621	0.574534	0.556986	0.564972	0.59317	0.606913	0.605724	0.601765	0.604007	0.602346	0.605617
128	CC(=O)OC1=CC=C2C3=C(C(OC)=C(C=C3CC[C@@H1](C2=CC1=O)OC(=O)C)OC)NC(=O)COC	0.547343	0.548054	0.547662	0.548211	0.547605	0.548485	0.548758	0.549789	0.549364	0.549364	0.549665	0.553939	0.551599	0.555556	0.554341	0.551157	0.555488	0.552121	0.555152	0.554745	0.552743	0.567043	0.553669	0.536341	0.561404	0.591479	0.591277	0.594158	0.598033	0.581942	0.583487	0.553296	0.580395	0.580952	0.584323	0.586957	0.575668	0.578449	0.575907	0.555626	0.564516	0.594306	0.608822	0.60857	0.602796	0.605018	0.603368	0.607536
129	CC(=O)OC1=CC=C2C3=C(C(OC)=C(C=C3CC[C@@H1](C2=CC1=O)OCNCC)O)OC	0.648983	0.644557	0.643885	0.64086	0.643678	0.642294	0.64255	0.637527	0.64209	0.64209	0.650253	0.648746	0.643162	0.646132	0.648241	0.648375	0.643571	0.646595	0.643112	0.64537	0.638554	0.690854	0.643777	0.665145	0.684051	0.720333	0.715356	0.710781	0.696442	0.695492	0.694342	0.617921	0.641379	0.638356	0.635374	0.637769	0.638794	0.638472	0.649928	0.671516	0.649379	0.636732	0.619109	0.61672	0.620847	0.621252	0.621429	0.619755
130	CC(=O)OC1=CC=C2C3=C(C(OC)=C(C=C3CC[C@@H1](C2=CC1=O)OC(=O)C)OC)OC	0.657495	0.654206	0.653515	0.650465	0.653295	0.651894	0.652143	0.648227	0.651677	0.651677	0.65873	0.658327	0.651526	0.654532	0.656652	0.656835	0.651957	0.656183	0.65032	0.658537	0.648057	0.693173	0.650997	0.673995	0.686422	0.722431	0.716196	0.712915	0.697406	0.696481	0.695335	0.622951	0.655172	0.650924	0.64898	0.641283	0.647984	0.648741	0.651246	0.674012	0.65312	0.636973	0.624679	0.622279	0.624352	0.625811	0.624919	0.624277
132	CCC(=O)OC1=CC=C2C=C(C3C[C@H1](NC(=O)C)C2=CC1=O)C=C(OC)C(=C3OC)OC(=O)OC	0.499418	0.502031	0.504353	0.5058	0.506094	0.507835	0.506373	0.51187	0.506952	0.506952	0.498262	0.505196	0.507497	0.504042	0.502887	0.49971	0.504037	0.503464	0.504614	0.507541	0.516503	0.513385	0.512776	0.461629	0.508031	0.534759	0.543078	0.54594	0.542007	0.532705	0.537059	0.501171	0.539828	0.546705	0.550029	0.546787	0.535572	0.540956	0.516579	0.463845	0.479239	0.507174	0.531556	0.533986	0.525655	0.525942	0.527233	0.531267
134	CCC(=O)OC1=CC=C2C3=C(C(OC)=C(C=C3CC[C@@H1](C2=CC1=O)OC(=O)C)NC)C=O	0.538462	0.538267	0.53885	0.537492	0.538801	0.539723	0.540013	0.539185	0.540643	0.540643	0.537975	0.538606	0.541066	0.541221	0.541903	0.537587	0.543109	0.539623	0.538896	0.545225	0.542267	0.554688	0.542191	0.528758	0.548828	0.580078	0.589193	0.589112	0.587109	0.56932	0.572983	0.536694	0.560419	0.564923	0.565564	0.571342	0.560467	0.564338	0.571154	0.559118	0.560233	0.584615	0.585569	0.584423	0.587846	0.5882	0.58753	0.585221
139	CC(C)C(=O)OC1=C2CC([C@@H1](NC(=O)C)CCC2=CC(=C1OC)OC)=CC(C(SC)=CC)=O	0.44521	0.45	0.451593	0.453184	0.452559	0.454432	0.453865	0.458904	0.454489	0.454489	0.443337	0.447401	0.453532	0.449752	0.448511	0.442236	0.447124	0.445545	0.446848	0.452336	0.453927	0.442332	0.451553	0.42665	0.442112	0.46149	0.467549	0.47448	0.464242	0.456305	0.458333	0.443118	0.492289	0.498767	0.506165	0.482635	0.477204	0.478498	0.446506	0.421625	0.432938	0.468694	0.478236	0.479143	0.481243	0.479789	0.478717	0.479675
141	CC(C)C(=O)OC1=C2C3=CC=C(C(C=C3[C@H1](CCC2=CC(OC)=C1OC)NC=O)C)OOC	0.470214	0.475448	0.476905	0.479215	0.477784	0.48037	0.478963	0.484447	0.479539	0.479539	0.473441	0.48129	0.48532	0.481844	0.480692	0.474048	0.481013	0.479562	0.477338	0.479239	0.487342	0.470416	0.477586	0.443402	0.468585	0.489772	0.496205	0.502627	0.502015	0.488979	0.48989	0.46412	0.518603	0.5246	0.531465	0.51991	0.509348	0.509594	0.478736	0.445556	0.463006	0.520293	0.539867	0.541482	0.540737	0.537604	0.539744	0.542129
142	CC(C)C(OC1=CC=C2C3=C(CC[C@@H1](C2=CC1=O)NC(C)=O)C=C(OC)C(OC)=C3OC)(O)C	0.826729	0.819092	0.81937	0.819647	0.817485	0.819785	0.814362	0.817212	0.81374	0.81374	0.798172	0.786947	0.786836	0.793519	0.796073	0.795748	0.787697	0.795472	0.787106	0.816373	0.813636	0.927681	0.849262	0.765163	0.9202	0.926471	0.926889	0.927994	0.872967	0.914585	0.907348	0.817405	0.826409	0.821797	0.823918	0.791607	0.823746	0.817118	0.849379	0.759907	0.738484	0.633638	0.625863	0.625548	0.628644	0.626979	0.623033	0.625471
144	CC(C1)C(=O)OC=CC2=CC([C@@H1](NC(C)=O)CCC3=CC(=C(OC)C(O)=C3C2)O)OC=CC1=O	0.446497	0.449524	0.450222	0.451838	0.450285	0.452185	0.451613	0.455808	0.452245	0.452245	0.447335	0.452366	0.457702	0.455696	0.45443	0.447118	0.450252	0.451389	0.453628	0.452818	0.452605	0.448254	0.452937	0.430438	0.448993	0.456522	0.456163	0.460368	0.46125	0.466156	0.470064	0.444373	0.462247	0.462431	0.467968	0.471937	0.472615	0.474847	0.44871	0.418831	0.432193	0.453565	0.463557	0.465347	0.461268	0.458968	0.459696	0.46414
146	CC(=O)N[C@@H1]1C2=CC(C(SC)=CC=C2C3=C(OC)C(=C(OC)C=C3CC1)OC(=O)C4=CC=CC=C4)=O	0.892691	0.884438	0.883167	0.87902	0.881135	0.879112	0.879205	0.871873	0.879969	0.879969	0.857143	0.84368	0.8434	0.85188	0.851768	0.854545	0.848576	0.852521	0.84794	0.884202	0.870846	0.823842	0.915241	0.829705	0.828113	0.817573	0.814486	0.810573	0.874813	0.817443	0.812913	0.883359	0.887982	0.882916	0.877924	0.963774	0.891932	0.884728	0.805861	0.721408	0.707541	0.633438	0.630872	0.629562	0.634627	0.635018	0.627139	0.629494
148	CC(=O)N[C@@H1]1C2=CC(C(SC)=CC=C2C3=C(C(OC)=C(OC)C=C3CC1)OC(=O)C4=CC=CC)=C4O	0.542014	0.547831	0.548333	0.551417	0.549139	0.550805	0.549335	0.556295	0.549889	0.549889	0.542429	0.549779	0.548512	0.548673	0.547566	0.544648	0.549475	0.548119	0.550028	0.54878	0.562465	0.533595	0.554692	0.502793	0.531127	0.550223	0.553701	0.557222	0.567956	0.54903	0.553957	0.542202	0.584387	0.587493	0.591457	0.597283	0.585205	0.589491	0.552355	0.498326	0.521499	0.56722	0.59428	0.596612	0.58958	0.587361	0.588453	0.595654
149	O=C(OC)OC1=CC=C2C3=C(C(OC)=C(C=C3CC[C@@H1](C2=CC1=O)NC(=O)C)OC)OC(=O)C	0.796559	0.790801	0.792439	0.787454	0.792006	0.790251	0.790406	0.785348	0.789823	0.789823	0.769626	0.759219	0.764281	0.765432	0.767831	0.767374	0.759942	0.772429	0.763215	0.789668	0.780772	0.889952	0.81825	0.737275	0.882775	0.913423	0.907874	0.901563	0.864804	0.935407	0.928063	0.787584	0.879581	0.871757	0.866814	0.800981	0.846379	0.839623	0.817028	0.730942	0.713978	0.633866	0.634282	0.632943	0.63404	0.634435	0.630502	0.63288
150	O=C(OC1)OC=C2C3=CC=C(C(C=C3[C@H1](CCC2=CC(=C1OC)OC)NCC)=O)OOC(=O)C	0.469106	0.47189	0.474282	0.472272	0.476077	0.475224	0.474657	0.480334	0.474374	0.474374	0.46806	0.469194	0.474215	0.474123	0.47381	0.46957	0.47503	0.475283	0.470379	0.475821	0.478932	0.482822	0.476758	0.432547	0.480025	0.491196	0.492447	0.491882	0.500298	0.490361	0.493093	0.469843	0.498829	0.501459	0.502326	0.504023	0.495637	0.499419	0.486811	0.441733	0.459007	0.488	0.502515	0.504188	0.503099	0.501689	0.498041	0.503915
151	O=C(OC)OC1=CC=C2C3=C(C(OC)=C(C=C3CC[C@@H1](C2=CC1=O)OC(=O)C)NC)C=O	0.535578	0.535398	0.535016	0.535602	0.534972	0.536862	0.536186	0.536341	0.536816	0.536816	0.537049	0.536723	0.541117	0.540302	0.540984	0.536662	0.542191	0.540643	0.539912	0.542351	0.538462	0.551724	0.538365	0.526797	0.545869	0.564881	0.564827	0.565857	0.585195	0.588809	0.592472	0.532823	0.54902	0.54878	0.550425	0.566667	0.567284	0.571165	0.567222	0.556075	0.556274	0.583744	0.585672	0.583581	0.586996	0.590223	0.587635	0.585322
152	O=C(OC1)OC=C2C3=CC=C(C(C=C3[C@H1](CCC2=CC(=C1OC)OC)NCC)=O)OOCO	0.468957	0.471755	0.474159	0.472139	0.475962	0.475105	0.474536	0.48024	0.474251	0.474251	0.467906	0.469923	0.473214	0.473999	0.473684	0.469424	0.47491	0.474282	0.470238	0.47482	0.478831	0.484568	0.476647	0.43309	0.481756	0.492975	0.494225	0.493648	0.5021	0.492121	0.494864	0.469697	0.494428	0.497076	0.497962	0.501441	0.49387	0.497669	0.48854	0.443217	0.460566	0.484536	0.5	0.50168	0.500565	0.5	0.495511	0.501402
155	O=C(OC)OCC(C=C1C(C2=C(C=C(OC)C(OC)=C2OC)CC[C@@H1]1NC(=O)C)=C)=O	0.433742	0.437576	0.438264	0.439829	0.439218	0.441051	0.440513	0.44546	0.441123	0.441123	0.438994	0.444783	0.446407	0.447095	0.445872	0.439682	0.445394	0.441194	0.441606	0.439024	0.446809	0.439725	0.440926	0.418868	0.438596	0.444239	0.443968	0.444512	0.461398	0.45086	0.452876	0.43165	0.452819	0.453901	0.45583	0.464912	0.457617	0.458949	0.443902	0.421086	0.432266	0.475429	0.488157	0.489043	0.492991	0.490665	0.488683	0.491319
156	O=C(OC)OC1=C2C3=CC=C(C(C=C3[C@H1](CCC2=CC(OC)=C1OC)NC=O)C)OOC	0.471304	0.474841	0.476301	0.478613	0.477181	0.479769	0.478361	0.483852	0.478938	0.478938	0.476246	0.4824	0.48644	0.484673	0.483516	0.476852	0.483834	0.480669	0.481844	0.480347	0.488466	0.470657	0.478687	0.450413	0.467098	0.485698	0.489523	0.493318	0.50491	0.497079	0.498836	0.465197	0.508542	0.511073	0.515306	0.525366	0.523482	0.524543	0.478136	0.45003	0.469186	0.525779	0.544494	0.546111	0.54627	0.543113	0.545251	0.54591
158	O=C(C)N[C@@H1]1C=2C(C3=C(C(=C(OC)C=C3CC1)OC)OC)C=C(OC)C(C=2)=O	0.456548	0.46195	0.463458	0.464964	0.465241	0.466152	0.46734	0.471251	0.467933	0.467933	0.457295	0.46281	0.466077	0.463357	0.462175	0.456213	0.462537	0.461039	0.461402	0.465006	0.465568	0.460097	0.464222	0.437424	0.457299	0.467703	0.469923	0.47209	0.479694	0.474061	0.478571	0.452864	0.478613	0.482122	0.484761	0.493432	0.48669	0.490468	0.463674	0.434386	0.452594	0.488558	0.508989	0.51151	0.506215	0.503102	0.504499	0.507856
159	O=C(O1)C=C(C(OC)=CC=2CC[C@@H1](C3=CC(=O)C(SC)=CC=C3C1=2)NC(C)=O)COC	0.5	0.50358	0.505967	0.504762	0.507757	0.505952	0.508939	0.510992	0.509535	0.509535	0.49881	0.499705	0.502065	0.505638	0.504451	0.500297	0.504739	0.505045	0.499115	0.507445	0.518452	0.468565	0.513723	0.46558	0.468452	0.477673	0.481547	0.48105	0.501458	0.48476	0.489175	0.503614	0.531579	0.534111	0.534843	0.545927	0.529959	0.534573	0.482195	0.430597	0.453434	0.487709	0.513499	0.514301	0.509967	0.509413	0.507438	0.511551
160	O=C(C)N[C@@H1]1CC(C2=C(C(=C(OC)C=C2CC1)OC)OC)C=C(OC)C(OCC=C)O	0.437951	0.441099	0.442773	0.441618	0.442848	0.444807	0.44517	0.445744	0.445822	0.445822	0.436969	0.438472	0.443005	0.439974	0.43961	0.435831	0.439119	0.44026	0.435119	0.439818	0.442506	0.439626	0.444661	0.428862	0.440349	0.444444	0.445098	0.447557	0.445868	0.445822	0.447984	0.434783	0.449905	0.450157	0.453125	0.453761	0.459596	0.461006	0.432903	0.414929	0.426981	0.443077	0.456235	0.458084	0.45735	0.453229	0.44964	0.45509
161	O=C(C)N[C@H1]1CCC2=CC(=C(OC)C(=C2C=3C1=CC(C(SC)=CC=3)=O)OC(=O)CC)COC	0.81191	0.810108	0.810382	0.806753	0.811239	0.80819	0.809626	0.807143	0.809045	0.809045	0.784188	0.773876	0.791372	0.781228	0.781073	0.78196	0.778325	0.783039	0.774035	0.806313	0.8	0.74929	0.83297	0.753086	0.751606	0.764457	0.769339	0.764665	0.744044	0.743945	0.741403	0.804506	0.881588	0.890253	0.882606	0.823973	0.836491	0.831359	0.738472	0.659091	0.656	0.609964	0.619668	0.618429	0.622236	0.619701	0.611243	0.619301
163	O=C(C)N[C@H1]1CCC2=CC(=C(OC)C(=C2C=3C1=CC(C(=CC=3)OC)CC)OOCOC)C=O	0.484	0.487457	0.488041	0.491168	0.488902	0.491458	0.490051	0.496305	0.489773	0.489773	0.480409	0.485585	0.492918	0.488662	0.488372	0.481839	0.488675	0.48641	0.483362	0.491178	0.502561	0.480947	0.493743	0.455176	0.478311	0.492264	0.496	0.500571	0.514497	0.499142	0.5	0.479679	0.514541	0.517011	0.522006	0.541249	0.523249	0.524288	0.490641	0.452285	0.474344	0.53059	0.552271	0.553855	0.551515	0.551819	0.554761	0.552819
165	C1C(=O)C=C(C2=CC=C(SC)C(C=C2[C@H1](NC(C)=O)C)C)OC(OC)=C1O	0.380012	0.380602	0.382209	0.382119	0.382353	0.38504	0.383721	0.386211	0.384333	0.384333	0.377682	0.381242	0.382139	0.381707	0.38133	0.378445	0.38017	0.381098	0.385836	0.387354	0.386861	0.374688	0.38763	0.362832	0.3725	0.385185	0.388684	0.392879	0.402313	0.392857	0.397664	0.37261	0.401791	0.405599	0.409388	0.423919	0.412575	0.417464	0.384615	0.357955	0.367322	0.410377	0.427089	0.4289	0.423768	0.42484	0.424855	0.423563
168	CC(=O)OC=C1C2=CC=C(SC)C(=O)C=C2[C@H1](CCC1=C(OC)C(OC)=C)OC(=O)OC	0.478131	0.482656	0.482388	0.48389	0.483294	0.484198	0.484505	0.486631	0.484217	0.484217	0.479689	0.482493	0.488414	0.485714	0.485408	0.48031	0.485731	0.485119	0.481921	0.482143	0.492271	0.445104	0.481306	0.458435	0.444908	0.453584	0.459238	0.460549	0.473256	0.458163	0.462617	0.471823	0.493627	0.498843	0.501443	0.512629	0.5	0.50463	0.463386	0.436068	0.454115	0.505166	0.525366	0.527887	0.520091	0.519525	0.517455	0.523354
169	CC(=O)OC=C1C2=CC=C(SC)C(=O)C=C2[C@H1](CCC1=C(OC)C(OC)=C)OCNC(=O)C	0.479856	0.484394	0.484122	0.485629	0.48503	0.485937	0.486244	0.488372	0.485953	0.485953	0.478755	0.480689	0.4875	0.484794	0.484487	0.479378	0.484812	0.483313	0.480119	0.483871	0.491364	0.445833	0.483026	0.45744	0.444776	0.450911	0.455718	0.457043	0.474912	0.45721	0.460819	0.47264	0.495349	0.500581	0.503185	0.515274	0.503492	0.507263	0.465021	0.435045	0.454006	0.5	0.521984	0.523649	0.51498	0.513559	0.514077	0.519977
171	C1=2C=CCC[C@H1](NC(=O)C)C1=CC(C(=CC=2)SC)=O	0.439189	0.439552	0.441462	0.439079	0.441549	0.440565	0.44098	0.44059	0.440653	0.440653	0.425296	0.420861	0.422853	0.424597	0.424176	0.426145	0.423667	0.426999	0.420248	0.440238	0.449704	0.391144	0.453323	0.406897	0.393759	0.387167	0.385275	0.383251	0.389356	0.390122	0.39273	0.45977	0.440341	0.438646	0.436975	0.429061	0.445074	0.446718	0.390435	0.341392	0.340366	0.326504	0.334985	0.335392	0.334166	0.334375	0.330645	0.335604
172	C1=2C=C(CC[C@H1](NC(=O)C)C1=CC(C(=CC=2)SC)=O)C(OC)C(=COC)OC	0.490982	0.494008	0.496671	0.49436	0.498668	0.495687	0.501997	0.499339	0.501663	0.501663	0.479868	0.480052	0.48366	0.480681	0.480341	0.480554	0.478772	0.484888	0.480392	0.493377	0.502642	0.449275	0.504325	0.452397	0.450993	0.449191	0.451675	0.449424	0.461538	0.45519	0.458226	0.5	0.504817	0.505754	0.503812	0.501877	0.509942	0.513116	0.465674	0.410914	0.417358	0.425926	0.436628	0.438444	0.434172	0.433587	0.430233	0.438045
173	C12C=C(CC[C@H1](NC(=O)C)C1=CC(C(=CC)SC)=O)C(OC)C(OC)=C2OC	0.366049	0.366708	0.369165	0.369939	0.371007	0.37285	0.374079	0.377451	0.374693	0.374693	0.366318	0.375	0.369221	0.369578	0.369193	0.366258	0.368068	0.369804	0.372022	0.371779	0.37561	0.365686	0.374617	0.350222	0.363465	0.373762	0.378162	0.381538	0.392792	0.382335	0.385468	0.363693	0.389952	0.393795	0.397619	0.40971	0.391538	0.394768	0.378378	0.353915	0.363467	0.404508	0.419803	0.419988	0.418076	0.416667	0.419186	0.418739
174	C123C=C(CC[C@H1](NC(=O)C)C1=CC(C(SC)=C2)=O)C(C(=C3OC)OC)OC	0.39403	0.395363	0.397741	0.399287	0.399524	0.401308	0.402497	0.406528	0.403092	0.403092	0.395003	0.405823	0.399175	0.399645	0.399289	0.397383	0.398936	0.398225	0.400355	0.399407	0.406268	0.389023	0.402967	0.377751	0.386941	0.398209	0.405728	0.408929	0.417946	0.406436	0.411065	0.391018	0.421267	0.426582	0.430226	0.440161	0.423523	0.428241	0.404154	0.378909	0.391617	0.438475	0.457531	0.458451	0.4561	0.453872	0.45625	0.455625
175	C12C=C(CC[C@H1](NC(=O)C)C1=CC(C(=CC)SC)=O)C(OC)C(=C2OC)OC(=O)C	0.384337	0.385723	0.388122	0.388856	0.389922	0.391722	0.392921	0.39617	0.393521	0.393521	0.383693	0.39211	0.38635	0.38677	0.386404	0.384431	0.385256	0.387001	0.391642	0.390653	0.394282	0.383394	0.392579	0.365148	0.381273	0.393591	0.398673	0.402769	0.412784	0.401086	0.404089	0.381269	0.410422	0.414962	0.419487	0.431225	0.411079	0.414194	0.396283	0.368812	0.379373	0.42368	0.441477	0.442428	0.437464	0.436073	0.439316	0.441227
176	C1=2C=C(CC[C@H1](NC(=O)C)C1=CC(C(=CC=2)SC)=O)C(OC)C(OC)=COC(=O)C	0.495076	0.498037	0.500654	0.498369	0.502618	0.499674	0.50589	0.503251	0.505559	0.505559	0.483139	0.484244	0.486834	0.484868	0.48358	0.483808	0.482028	0.488057	0.486486	0.497396	0.506494	0.455901	0.508175	0.454305	0.457627	0.459425	0.461832	0.459545	0.470514	0.463446	0.466413	0.502986	0.51235	0.513241	0.511278	0.509259	0.515477	0.518589	0.472878	0.41629	0.423367	0.433117	0.445977	0.447761	0.442775	0.442197	0.440483	0.448216
178	CC(=O)OCC1=CN(N=N1)[C@H1]2CCC3=CC(OC)=C(OC)C(OC)=C3C=4C2=CC(=O)C(NC)=CC=4C	0.61964	0.622057	0.620519	0.625	0.62037	0.622222	0.622455	0.622236	0.622072	0.622072	0.619814	0.6168	0.622086	0.623537	0.623305	0.619283	0.625385	0.620923	0.625	0.624845	0.625153	0.616834	0.622537	0.60828	0.612194	0.622981	0.621605	0.621389	0.635863	0.627087	0.630475	0.598275	0.633794	0.633154	0.632519	0.640449	0.634512	0.639138	0.670044	0.655716	0.660269	0.89369	0.906836	0.903204	0.917855	0.9369	0.910991	0.904953
179	CC(=O)OCC1=CN(N=N1)[C@H1]2CCC3=CC(OC)=C(OC)C(=C3C=4C2=CC(C(NC)=CC=4)=O)OC	0.625159	0.627612	0.626027	0.630614	0.625868	0.62776	0.627995	0.627746	0.627599	0.627599	0.626346	0.623197	0.626566	0.629093	0.628859	0.624763	0.628931	0.626415	0.630585	0.630449	0.630721	0.618193	0.62398	0.620013	0.613462	0.624446	0.623033	0.622807	0.632463	0.628625	0.632075	0.599246	0.632416	0.631771	0.631133	0.635273	0.631163	0.635866	0.674644	0.673663	0.672357	0.924113	0.93564	0.931771	0.947405	0.968794	0.938761	0.93232
180	O=C(OC1)OC=CC=C2C3=C(OC)C(=C(OC)C=C3CC[C@H1](NC(=O)C)C2=CC1)OOC	0.457245	0.460036	0.460674	0.46304	0.461584	0.463357	0.46281	0.467571	0.4634	0.4634	0.458851	0.462625	0.46934	0.466627	0.466312	0.459491	0.464938	0.462581	0.462941	0.46222	0.477515	0.467879	0.465762	0.434704	0.465088	0.47542	0.477612	0.478882	0.497031	0.481769	0.483621	0.455304	0.482659	0.483592	0.486223	0.501718	0.489017	0.491066	0.473029	0.441266	0.454167	0.500288	0.519752	0.521421	0.517026	0.513881	0.517827	0.520316
181	O=C(OC1)OC=CC=C2C3=C(OC)C(=C(OC)C=C3CC[C@@H1](NC(C)=O)C2=CC1)OOC	0.457245	0.460036	0.460674	0.46304	0.461584	0.463357	0.46281	0.467571	0.4634	0.4634	0.458851	0.462625	0.46934	0.466627	0.466312	0.459491	0.464938	0.462581	0.462941	0.46222	0.477515	0.467879	0.465762	0.434704	0.465088	0.47542	0.477612	0.478882	0.497031	0.481769	0.483621	0.455304	0.482659	0.483592	0.486223	0.501718	0.489017	0.491066	0.473029	0.441266	0.454167	0.500288	0.519752	0.521421	0.517026	0.513881	0.517827	0.520316
186	O=C(NC)NCC=CN(COCC)C1C(C2=C(OC)C=C(OC)C=C2CC[C@@H1]1NC=O)C=O	0.442248	0.446087	0.44766	0.449231	0.447724	0.451355	0.449017	0.45488	0.449631	0.449631	0.443077	0.44798	0.448718	0.446756	0.444648	0.442875	0.449479	0.44703	0.444783	0.451077	0.45	0.437578	0.450307	0.427486	0.437343	0.447466	0.451633	0.45572	0.453116	0.450522	0.452541	0.441962	0.466427	0.470975	0.475508	0.478441	0.468619	0.469048	0.440049	0.414465	0.431034	0.459555	0.471698	0.474286	0.475448	0.47147	0.472989	0.476491
187	O=C(C)N[C@H1]CC1C2=CC(OC)=C(C(OC)=C2C3=CC=C(SC)C(=O)C=C13)OOCC	0.710124	0.705202	0.705628	0.702372	0.705331	0.705036	0.704023	0.70336	0.703518	0.703518	0.700072	0.694444	0.6934	0.697857	0.698856	0.698059	0.691542	0.699571	0.695869	0.705755	0.700569	0.646055	0.711303	0.714826	0.647857	0.645702	0.642857	0.64592	0.63286	0.634298	0.633562	0.685426	0.690034	0.685539	0.686821	0.671761	0.686007	0.685462	0.647507	0.640319	0.626305	0.606547	0.607831	0.607564	0.602372	0.606763	0.603985	0.606456
188	O=C(NC)N1CC=CC=C2C([C@H1](CCC3=CC(OC)=C(C(OC)=C32)OC)NC=O)C=C1O	0.469952	0.474505	0.476019	0.477531	0.476048	0.47873	0.478157	0.482079	0.478755	0.478755	0.468022	0.474405	0.47331	0.471463	0.471148	0.468657	0.473246	0.473496	0.470344	0.475792	0.488636	0.471054	0.477612	0.450031	0.469151	0.478602	0.479017	0.482944	0.486103	0.483193	0.48416	0.466265	0.498828	0.501461	0.505834	0.500574	0.501754	0.502038	0.478806	0.448742	0.465984	0.5	0.516093	0.517766	0.515927	0.514497	0.516733	0.522676
189	O=C(CC)OC1=C2CC([C@@H1](NC(C)=O)CCC2=CC(OC)=C1OC)=CC(C(=CC)SC)=O	0.444934	0.449749	0.45135	0.451128	0.452321	0.452381	0.453634	0.456875	0.454261	0.454261	0.443054	0.447139	0.452396	0.449501	0.448254	0.441948	0.446861	0.445274	0.446584	0.452098	0.453698	0.442957	0.451311	0.426272	0.442738	0.462222	0.468314	0.466919	0.464064	0.456085	0.458125	0.44283	0.49225	0.498761	0.498767	0.48166	0.47619	0.477494	0.44624	0.421222	0.432602	0.466786	0.474695	0.47561	0.478542	0.477086	0.476023	0.476135
190	O=C(C)N[C@H1]1CCC2=CC(OC)=C(C(OC)=C2CC1=CC(C(OC(CC)=O)=CC)=O)OCNC	0.440559	0.445431	0.446134	0.44592	0.447118	0.447185	0.44845	0.449905	0.449083	0.449083	0.441419	0.441933	0.447236	0.448864	0.447601	0.440303	0.445283	0.440955	0.445003	0.447818	0.445836	0.44129	0.447037	0.428105	0.441062	0.451469	0.449303	0.448928	0.460864	0.454603	0.455752	0.440256	0.460971	0.460269	0.461351	0.470695	0.46683	0.467278	0.439223	0.418347	0.428119	0.456679	0.466628	0.468421	0.471285	0.465487	0.467059	0.465497
191	O=C(NC)NCC=CN(COC1C)CC(C2=C(OC)C(=C(OC)C=C2CC[C@@H1]1)NC(=O)C)OC=O	0.427781	0.432515	0.43409	0.433905	0.43417	0.434251	0.434597	0.436929	0.435208	0.435208	0.429534	0.432745	0.436131	0.433272	0.432054	0.430233	0.436852	0.437042	0.434836	0.4375	0.439173	0.424751	0.433272	0.408291	0.423581	0.435613	0.43892	0.442131	0.449363	0.440491	0.442543	0.423906	0.452267	0.45682	0.460487	0.46702	0.459701	0.461905	0.448615	0.425749	0.443196	0.470623	0.480925	0.481823	0.483946	0.482497	0.482278	0.484076
192	O=C(C)N[C@H1]1CCC2=CC(OC)=C(C(OC)=C2CC1=CC(C(OC(CC)=O)=CC)=O)OC	0.435006	0.439024	0.439744	0.439539	0.440743	0.440819	0.442099	0.443595	0.442738	0.442738	0.435897	0.437381	0.441831	0.442529	0.441252	0.434783	0.439847	0.435474	0.439567	0.442382	0.438608	0.436601	0.440689	0.423179	0.436352	0.44509	0.442949	0.442602	0.45564	0.447368	0.447637	0.433743	0.452233	0.451573	0.452703	0.46398	0.458153	0.457742	0.432826	0.413316	0.419706	0.445455	0.454064	0.455026	0.458606	0.453682	0.455299	0.453796
193	O=C(C)N[C@H1]CC1C2=CC(OC)=C(C(OC)=C2C3=CC=C(SC)C(=O)C=C13)OCC	0.745455	0.740045	0.740435	0.735624	0.738772	0.738416	0.737313	0.733877	0.736764	0.736764	0.733333	0.727071	0.723326	0.730712	0.730512	0.731143	0.722714	0.728688	0.72855	0.740464	0.732103	0.670588	0.742345	0.760095	0.673817	0.671005	0.666667	0.665004	0.652265	0.656472	0.654417	0.714286	0.727468	0.721277	0.717606	0.695473	0.709655	0.706583	0.664291	0.668924	0.64964	0.618828	0.614603	0.614313	0.613171	0.616667	0.611712	0.614213
194	O=C(C)N[C@H1]1CCC2=CC(OC)=C(C(OC)=C2C=CC=C(OC(C)=O)C(C=C1)=O)OC	0.420699	0.422074	0.422846	0.423616	0.422	0.424	0.423435	0.426012	0.424101	0.424101	0.418838	0.423358	0.42234	0.42392	0.422591	0.418667	0.421192	0.418543	0.419974	0.425617	0.434176	0.429945	0.42392	0.411806	0.430642	0.435047	0.434812	0.436412	0.44246	0.436535	0.436874	0.416442	0.430868	0.430307	0.433397	0.437028	0.430582	0.430299	0.428096	0.414226	0.417116	0.419012	0.425197	0.425378	0.429534	0.427173	0.427179	0.425803
195	CC(=O)N[C@@H1]C1=C2C(C(NC)=CC=C1C3=C(OC)C(OC)=C(OC)C=C3CC2)NC=O	0.462121	0.464846	0.466318	0.468641	0.46806	0.469803	0.469258	0.476494	0.469838	0.469838	0.461985	0.469057	0.473106	0.46875	0.466744	0.463457	0.46709	0.468171	0.466821	0.470383	0.481138	0.464814	0.470452	0.44095	0.462085	0.477393	0.481265	0.484229	0.495935	0.483607	0.483683	0.455977	0.493729	0.496305	0.500568	0.510722	0.496587	0.497732	0.478463	0.446567	0.464244	0.505936	0.521595	0.52323	0.520624	0.517529	0.520556	0.522992
196	CC(=O)N[C@@H1]1C2=CC(C(NC)=CC=C2C3=C(OC)C(OC)=C(OC)C=C3C1)=O	0.717327	0.718567	0.716472	0.719388	0.714909	0.714597	0.714804	0.714079	0.714286	0.714286	0.707122	0.698925	0.700286	0.706052	0.70584	0.705072	0.702082	0.705331	0.704023	0.732942	0.705082	0.745083	0.72973	0.675074	0.746201	0.735207	0.73785	0.734455	0.724731	0.733138	0.729258	0.699781	0.702571	0.702628	0.700344	0.700814	0.701936	0.700138	0.83153	0.775414	0.753012	0.647292	0.635787	0.636479	0.639744	0.640154	0.633991	0.635384
197	CC(=O)N[C@@H1]C1=CC(C(NC)=CC=C1C2=C(OC)C(OC)=C(OC)C=C2CC)N=O	0.443286	0.44621	0.446004	0.449328	0.445189	0.449664	0.446472	0.451397	0.44708	0.44708	0.442343	0.448967	0.451456	0.448632	0.448297	0.443023	0.447816	0.446266	0.44579	0.44939	0.462477	0.445828	0.447752	0.425972	0.444722	0.45561	0.457055	0.458435	0.466384	0.459509	0.460599	0.439459	0.464646	0.466548	0.469303	0.479179	0.467694	0.469858	0.460502	0.437262	0.449876	0.485494	0.500579	0.500577	0.498544	0.497962	0.498549	0.50464
199	CC(=O)N[C@@H1]C1=C2C(C(NC)=CC=C1C3=C(OC)C(OC)=C(OC)C=C3CC2)N=O	0.456977	0.45971	0.461182	0.463499	0.46292	0.464658	0.46412	0.469636	0.464699	0.464699	0.457706	0.464781	0.468822	0.465318	0.464162	0.459178	0.463668	0.465587	0.462558	0.463542	0.475116	0.459587	0.464471	0.435761	0.456856	0.472173	0.47519	0.47816	0.489005	0.479252	0.48021	0.451688	0.489471	0.492054	0.496317	0.503937	0.491487	0.493492	0.473287	0.443053	0.459918	0.500846	0.517413	0.51905	0.516416	0.513333	0.518046	0.520487
200	CC(=O)N[C@@H1]1C2=CC(C(NC)=CC=C2C3=C(OC)C(OC)=C(OC)C=C3C1)NC=O	0.465157	0.468714	0.47018	0.471644	0.470214	0.473654	0.471404	0.477759	0.471982	0.471982	0.467555	0.475448	0.478637	0.475998	0.474841	0.468171	0.473472	0.473715	0.471503	0.475942	0.484954	0.471353	0.474292	0.443262	0.468639	0.483001	0.485114	0.487194	0.501449	0.488318	0.488372	0.461583	0.494892	0.496606	0.5	0.515203	0.499433	0.500565	0.486612	0.454057	0.473314	0.520727	0.540435	0.542921	0.537858	0.535574	0.536872	0.541853
201	CC(=O)N[C@@H1]C1=C2C(C(NC)=CC=C1C3=C(OC)C(OC)=C(OC)C=C3CC2)=O	0.674419	0.672269	0.671558	0.670851	0.671319	0.67108	0.671309	0.671983	0.670842	0.670842	0.663877	0.661146	0.659107	0.663209	0.662976	0.664345	0.665284	0.662517	0.663674	0.67411	0.667126	0.699782	0.686536	0.645161	0.703136	0.692472	0.692797	0.691011	0.689488	0.694425	0.692146	0.657784	0.668008	0.667111	0.666224	0.667104	0.673141	0.671552	0.769853	0.728302	0.712527	0.641375	0.633354	0.632005	0.634131	0.633501	0.633626	0.636023
202	CC(=O)N1[C@@H1]C2=CC(C(NC)=CC=C2C3=C(OC)C(OC)=C(OC)C=C3CC1)N=O	0.455197	0.45975	0.459524	0.463647	0.458705	0.463095	0.459941	0.466469	0.460534	0.460534	0.45682	0.462359	0.466509	0.463777	0.463458	0.457466	0.462952	0.461447	0.461812	0.466309	0.475595	0.457853	0.461174	0.435976	0.456813	0.469916	0.471257	0.473433	0.481942	0.473653	0.474657	0.452367	0.480814	0.484339	0.487847	0.496552	0.483759	0.48583	0.475478	0.448829	0.466143	0.50029	0.523349	0.523295	0.51801	0.516571	0.518814	0.526526
203	C1OC=CC2C([C@@H1](N)CCC1=CCOC(=O)OCC=C)(OC)C(=C2)OCSC	0.361868	0.36346	0.364281	0.36686	0.366215	0.367268	0.367675	0.37299	0.368319	0.368319	0.36658	0.3713	0.370513	0.368252	0.367846	0.3674	0.364917	0.370251	0.367308	0.36352	0.376365	0.352518	0.367373	0.354125	0.351937	0.358478	0.361361	0.363171	0.374128	0.366559	0.37075	0.359375	0.379289	0.380745	0.383045	0.398274	0.38875	0.392145	0.354736	0.340879	0.349483	0.375	0.386485	0.387574	0.381179	0.38223	0.381602	0.384615
204	COC=C1C2=CC=C(NC)C(=O)C=C2[C@H1](CCC1C=COC)NC(=O)CNC	0.421461	0.424613	0.427191	0.427928	0.429124	0.430135	0.430502	0.435733	0.430225	0.430225	0.414213	0.411392	0.411356	0.416402	0.41513	0.415867	0.417408	0.419375	0.412658	0.427103	0.429847	0.432254	0.436493	0.388852	0.431034	0.437134	0.437824	0.441214	0.445153	0.442283	0.444444	0.435039	0.445557	0.445828	0.44879	0.447706	0.447007	0.450249	0.480744	0.429635	0.438527	0.446835	0.45988	0.460849	0.458384	0.456902	0.455036	0.461354
205	C1OC=C2C=3C([C@H1](CCC2=C1)N=CCC(=CC=3)SC)=O	0.29244	0.296958	0.297886	0.297101	0.299868	0.299275	0.30317	0.300131	0.303831	0.303831	0.293923	0.294964	0.295306	0.29535	0.295738	0.294855	0.293926	0.298096	0.29797	0.295664	0.298566	0.282274	0.29535	0.282086	0.282258	0.293651	0.296906	0.299016	0.30401	0.295276	0.298888	0.287043	0.307107	0.308907	0.309868	0.318182	0.304978	0.308611	0.293272	0.279533	0.292	0.314179	0.321256	0.322483	0.321951	0.319732	0.318595	0.320265
206	COC=C1C2=CC=C(NC)C(=O)C=C2[C@H1](CCC1C=COC)NC(=O)NNC	0.415969	0.417308	0.418962	0.420615	0.420884	0.421895	0.422265	0.426564	0.421995	0.421995	0.416026	0.418575	0.418516	0.420013	0.418738	0.417681	0.419211	0.420281	0.415346	0.420716	0.423492	0.418194	0.423642	0.392505	0.41694	0.425065	0.426735	0.431046	0.429653	0.427471	0.430582	0.421977	0.436567	0.438662	0.442522	0.438906	0.435374	0.439506	0.466141	0.433514	0.44232	0.445946	0.459007	0.459976	0.458384	0.45778	0.453293	0.461354
207	COC=C1C2=CC=C(NC)C(=O)C=C2[C@H1](CCC1C=COC)NC(=O)NC	0.416883	0.419146	0.420814	0.422481	0.422754	0.423773	0.424145	0.428479	0.423871	0.423871	0.416021	0.415867	0.414914	0.418217	0.416934	0.417689	0.419231	0.420308	0.415335	0.421663	0.424456	0.418206	0.423696	0.393236	0.416942	0.423277	0.424047	0.427466	0.428844	0.428479	0.43069	0.422018	0.434919	0.436137	0.43913	0.43643	0.435514	0.438782	0.465563	0.433653	0.444444	0.443484	0.455803	0.456783	0.455152	0.455428	0.450933	0.45728
208	COC=C1C2=CC=C(NC)C(=O)C=C2[C@H1](CCC1C=COC)NC(=O)N	0.41422	0.415584	0.417262	0.418936	0.419208	0.420233	0.420609	0.424968	0.420337	0.420337	0.413368	0.413239	0.412292	0.415593	0.414304	0.415045	0.416613	0.417689	0.412709	0.419041	0.421865	0.415507	0.421087	0.390406	0.414229	0.42064	0.421429	0.42487	0.426292	0.424951	0.427184	0.419355	0.432432	0.433667	0.436681	0.434009	0.432145	0.435434	0.463074	0.430928	0.43992	0.440174	0.452625	0.453614	0.451946	0.451338	0.44686	0.454106
209	COC=CC=C(C1=C2C=C(NC)CC=C1[C@H1](C)N=[N+1])[N-1]CC(OC)=C2OC	0.373191	0.375549	0.378056	0.374532	0.379937	0.378361	0.379612	0.381308	0.380238	0.380238	0.373434	0.376244	0.376317	0.375	0.374611	0.374218	0.376866	0.379526	0.378345	0.380714	0.384568	0.368555	0.375	0.355484	0.366305	0.374137	0.377736	0.37858	0.38656	0.38805	0.38948	0.361355	0.386336	0.387718	0.389089	0.402985	0.39721	0.399637	0.372829	0.351386	0.365409	0.390244	0.402665	0.405327	0.398369	0.401051	0.401163	0.402432
210	COC1=C2C3=CC=C(NC)C(=O)C=C3[C@@H1](NCCC)CCC2=CC(=C1OC)NC	0.752915	0.761662	0.759448	0.758521	0.757796	0.757422	0.757598	0.752874	0.758321	0.758321	0.729943	0.720339	0.719212	0.725018	0.724823	0.729092	0.73452	0.726757	0.730305	0.750541	0.74359	0.765625	0.743553	0.695113	0.766816	0.755459	0.751625	0.749462	0.744531	0.748201	0.744286	0.715412	0.723288	0.719728	0.717377	0.710771	0.719048	0.717185	0.848255	0.793503	0.772021	0.666667	0.65768	0.655215	0.666032	0.66434	0.655975	0.658307
212	C=1OC=CC2=C(C3=C(OC)C(OC)=CC=C3CC[C@@H1]2N=[N+1]=[N-1])NC=CC=1	0.457388	0.462952	0.464504	0.465159	0.464548	0.465486	0.466707	0.470732	0.466422	0.466422	0.462623	0.466504	0.47526	0.47246	0.470336	0.465074	0.468902	0.464677	0.463267	0.464308	0.47651	0.444855	0.459951	0.436796	0.444651	0.452773	0.457751	0.459116	0.469633	0.459295	0.462144	0.45092	0.471319	0.474926	0.477647	0.491794	0.479574	0.4817	0.455865	0.430981	0.450644	0.472949	0.483834	0.485552	0.486827	0.48201	0.486024	0.486087
213	COC1=C2C3=CC=C(NC)C(=O)C=C3[C@H1](CCC2=CC(OC)=C1OC)NN=NC=C	0.752843	0.748683	0.746437	0.748126	0.74476	0.747006	0.744586	0.741098	0.74403	0.74403	0.749812	0.742007	0.739452	0.747015	0.748132	0.747558	0.746647	0.744966	0.746091	0.746447	0.744444	0.767442	0.743112	0.783373	0.768692	0.75416	0.750188	0.746647	0.731441	0.749251	0.746468	0.712584	0.714791	0.709972	0.706416	0.696306	0.714085	0.713385	0.852174	0.912371	0.864668	0.695533	0.674984	0.672335	0.682846	0.679947	0.676568	0.673443
214	COC=CC1=C(C2=CC=C(NC)CC=C2[C@H1](C)N=[N+1])[N-1]CC(OC)=C1OC	0.365444	0.367802	0.370279	0.367674	0.372136	0.371446	0.371834	0.373538	0.372452	0.372452	0.366563	0.36855	0.371166	0.369004	0.368615	0.367347	0.370006	0.373457	0.370621	0.372913	0.375921	0.361635	0.368162	0.346056	0.358538	0.368094	0.371676	0.372537	0.383018	0.382701	0.384139	0.355459	0.378734	0.380131	0.381517	0.399408	0.391957	0.394375	0.365196	0.341169	0.358608	0.38925	0.401611	0.404255	0.398148	0.400812	0.402545	0.40138
215	COC1=C2C3=CC=C(NC)C(=O)C=C3[C@@H1](NCCC)CCC2=CC(=C1OC)OSC	0.813027	0.822222	0.81971	0.818598	0.817835	0.817352	0.81749	0.812075	0.818251	0.818251	0.786466	0.774241	0.77548	0.780669	0.780506	0.784108	0.780252	0.78125	0.780995	0.811221	0.797761	0.824863	0.798048	0.752301	0.82783	0.815608	0.811077	0.807084	0.792926	0.807256	0.802701	0.768595	0.766762	0.765248	0.762509	0.758501	0.76204	0.759859	0.914537	0.864268	0.829837	0.686288	0.673089	0.670505	0.678571	0.679012	0.670316	0.673732
216	COC=C1C2=CC=C(NC)C(=O)C=C2[C@@H1](N3N=NC=C3)CCC1=CC(=COC)OC	0.450504	0.45503	0.455674	0.457177	0.455726	0.457497	0.456099	0.460859	0.45583	0.45583	0.457295	0.459364	0.462625	0.463357	0.462175	0.457938	0.46513	0.463631	0.457966	0.457227	0.463845	0.444378	0.457328	0.425301	0.442446	0.455516	0.457767	0.458235	0.473623	0.457547	0.460317	0.452864	0.472654	0.475316	0.477117	0.49258	0.475589	0.47851	0.485612	0.451137	0.46747	0.585619	0.594065	0.594787	0.592593	0.595808	0.589424	0.596554
217	COC1=C2C3=CC=C(NC)C(=O)C=C3[C@H1](CCC2=CC(=C1OC)OC)NCCCS	0.844073	0.85362	0.850912	0.849684	0.848892	0.848341	0.848461	0.841158	0.847792	0.847792	0.813084	0.8	0.798473	0.808166	0.808019	0.810559	0.804916	0.806005	0.805684	0.840409	0.821759	0.857027	0.826459	0.781051	0.860294	0.839399	0.833072	0.827372	0.808188	0.827613	0.822755	0.794553	0.786029	0.780452	0.774964	0.764372	0.778426	0.776087	0.9575	0.907692	0.863489	0.694997	0.673429	0.670795	0.682361	0.681698	0.672799	0.674084
218	COC1=CC=C(C2=CC=C(NC)CC=C2[C@H1](C)N=[N+1])[N-1]CC(OC)=C1OC	0.342839	0.345384	0.347966	0.34361	0.349903	0.34749	0.349646	0.348912	0.35029	0.35029	0.344961	0.346351	0.347382	0.345932	0.345513	0.345806	0.346129	0.351351	0.348495	0.349002	0.353167	0.335953	0.34335	0.329105	0.333552	0.34129	0.344252	0.344409	0.355513	0.352903	0.35279	0.330749	0.35254	0.354938	0.355651	0.373391	0.361042	0.361952	0.342912	0.326653	0.338312	0.357099	0.368265	0.371006	0.365316	0.366348	0.36742	0.365623
221	C=C1C([C@H1](CCC2=CC(=C(OC)C(=C21)OC)OC)NC=CNCOCC(C)C)=O	0.429227	0.431462	0.433138	0.432943	0.433225	0.435179	0.43368	0.437095	0.43433	0.43433	0.427362	0.429864	0.433463	0.432275	0.430979	0.428107	0.429587	0.429773	0.429309	0.432099	0.438551	0.436497	0.429495	0.419878	0.436242	0.440421	0.442043	0.444517	0.445659	0.439008	0.441196	0.425099	0.437892	0.439101	0.442092	0.444649	0.437578	0.439055	0.440104	0.42517	0.431398	0.457268	0.469338	0.469412	0.47149	0.467278	0.46622	0.47532
222	C12=CC(C(SC)=CC=C1C3=C(C=C(C(OC)=C3OC)OC)CC[C@@H1]2NCC(C)CN)C=O	0.464413	0.468917	0.470414	0.473653	0.470449	0.473964	0.471665	0.479905	0.472255	0.472255	0.464265	0.471454	0.474706	0.472009	0.470831	0.464897	0.471176	0.46796	0.46831	0.471943	0.483757	0.468957	0.470277	0.438554	0.467069	0.479092	0.481261	0.484273	0.492643	0.484524	0.486358	0.460761	0.492192	0.492228	0.495692	0.504278	0.495095	0.496262	0.475797	0.443368	0.455299	0.50545	0.52306	0.524719	0.522946	0.519796	0.523729	0.522766
223	COC=C(OC)C(OC)=C1CCC[C@H1](N2C=CN=N2)C3=CC(=O)C(=CC=C3C1)NC	0.411836	0.415663	0.416366	0.417919	0.416466	0.418269	0.417767	0.421809	0.417516	0.417516	0.41531	0.418563	0.421053	0.421622	0.42042	0.414311	0.421716	0.421875	0.417215	0.41887	0.422342	0.406955	0.418214	0.390635	0.404893	0.417775	0.420229	0.420012	0.433254	0.423494	0.426426	0.411408	0.430491	0.433314	0.434455	0.446882	0.436077	0.439977	0.447159	0.41903	0.435534	0.554239	0.562765	0.563559	0.562004	0.565217	0.557039	0.562424
224	COC=C(OC)C(OC)=CC=1CC[C@H1](NC(=N)N)C2=CC(=O)C(=CC=C2C=1)CNC	0.417488	0.419777	0.421466	0.420366	0.423429	0.421671	0.422048	0.422727	0.422701	0.422701	0.423127	0.427546	0.427456	0.42624	0.426797	0.425756	0.426336	0.426519	0.423277	0.425114	0.42885	0.412234	0.418831	0.394489	0.411883	0.416503	0.418241	0.418017	0.427746	0.422701	0.424951	0.412385	0.432091	0.433333	0.434565	0.431034	0.432704	0.43601	0.415534	0.390195	0.400131	0.397219	0.408824	0.409865	0.40866	0.408902	0.408151	0.409412
225	COC1=C(OC)C(OC)=CC=2CC[C@H1](NC(=N)N)C3=CC(=O)C(=CC=C3C1=2)CNC	0.813788	0.807541	0.805012	0.805317	0.803125	0.804059	0.8	0.795981	0.799378	0.799378	0.814522	0.809672	0.801084	0.806703	0.806552	0.81768	0.802019	0.808743	0.804196	0.802027	0.793846	0.834959	0.801088	0.792208	0.838103	0.819334	0.811765	0.806226	0.786202	0.810642	0.803101	0.769231	0.768607	0.76187	0.757796	0.74379	0.768892	0.762737	0.79845	0.786699	0.757716	0.63807	0.621552	0.619169	0.628571	0.627922	0.619691	0.622194
227	CNC(NCCCC)=S[C@@H1]C1=CC(=O)C(NC)=CC=C1C2=C(C=C(OC)C(=C2OC)OC)CCF	0.624814	0.622878	0.624631	0.623988	0.624448	0.624265	0.624541	0.623083	0.624082	0.624082	0.620206	0.614265	0.613488	0.622255	0.621978	0.619573	0.618527	0.616788	0.621622	0.620235	0.618287	0.630106	0.619883	0.642746	0.631939	0.627596	0.624724	0.620891	0.612303	0.615778	0.612763	0.59224	0.606993	0.604167	0.600276	0.590142	0.596819	0.595598	0.69313	0.729218	0.701329	0.640056	0.622742	0.621333	0.621294	0.625	0.620805	0.622326
231	C12=CC(C(NC)=CC=C1C3=C(C=C(C(OC)=C3OC)OC)CC[C@@H1]2NCCCCCCCCCCC)CSC=O	0.46564	0.470136	0.472501	0.474867	0.474276	0.47605	0.477232	0.482861	0.477824	0.477824	0.468085	0.474397	0.479388	0.475825	0.474646	0.468713	0.473251	0.472631	0.470381	0.470554	0.48408	0.467548	0.469759	0.443305	0.465663	0.478546	0.479834	0.481963	0.491197	0.483086	0.48492	0.458531	0.493356	0.493387	0.495986	0.506271	0.495392	0.496556	0.477005	0.44815	0.463458	0.509185	0.52673	0.528387	0.526644	0.522624	0.526554	0.528153
232	CN(C(=S)N[C@@H1]1C2=CC(=O)C(NC)=CC=C2C3=C(C=C(OC)C(OC)=C3OC)CC1C)C#N	0.768778	0.762044	0.759825	0.762737	0.75817	0.759071	0.757971	0.75703	0.757422	0.757422	0.767033	0.763043	0.756659	0.765432	0.765262	0.764792	0.762491	0.759594	0.763215	0.763636	0.757728	0.776612	0.762872	0.745113	0.779201	0.771324	0.767323	0.766328	0.74611	0.762527	0.75974	0.73314	0.740305	0.735395	0.735294	0.725991	0.737096	0.736301	0.86294	0.84689	0.81549	0.687789	0.674699	0.672142	0.675831	0.674121	0.670902	0.672152
233	C1=C2C(C3=C(C=C(OC)C(=C3OC)OC)CC[C@@H1]2NCCCCCCCCCCCC=C)C=C(SC)C1=O	0.458937	0.464415	0.466828	0.46747	0.468637	0.46956	0.471653	0.475617	0.472256	0.472256	0.461446	0.468788	0.471223	0.466707	0.465507	0.462094	0.465868	0.463473	0.466467	0.464865	0.46806	0.457213	0.463196	0.438694	0.454378	0.464933	0.466306	0.466747	0.476219	0.472256	0.477711	0.455206	0.476914	0.477881	0.478841	0.492779	0.485079	0.489772	0.461768	0.435613	0.453172	0.492165	0.511959	0.515376	0.509164	0.509456	0.506553	0.510808
234	C12=CC3(C(NC)=CC=C1C4=C(C=C(C(OC)=C4OC)OC)CC[C@@H1]2NCCCCCCCCCCC)C=C3	0.465713	0.470238	0.472619	0.475	0.474405	0.47619	0.477381	0.482164	0.477976	0.477976	0.469048	0.474526	0.480427	0.476841	0.475653	0.469679	0.474245	0.473622	0.472222	0.47153	0.485154	0.466747	0.468123	0.44323	0.464848	0.476932	0.477354	0.479501	0.491435	0.48062	0.481591	0.457688	0.49187	0.491908	0.494524	0.505734	0.494786	0.495095	0.477151	0.449878	0.464393	0.50779	0.523729	0.525395	0.524487	0.521319	0.524404	0.526882
236	C12=CC(C(NC)=CC=C1C3=C(C=C(C(OC)=C3OC)OC)CC[C@@H1]2N4C=C(N=N4)CCC)C=CNC=O	0.478285	0.48338	0.483962	0.487887	0.48398	0.487338	0.485955	0.492135	0.486517	0.486517	0.482254	0.489051	0.492981	0.490439	0.490152	0.482836	0.491287	0.488202	0.486835	0.485393	0.496629	0.476897	0.483763	0.453089	0.474286	0.488952	0.490971	0.494648	0.509264	0.496606	0.499154	0.476514	0.510227	0.511013	0.515952	0.530735	0.512128	0.514851	0.487381	0.454389	0.480431	0.553442	0.594203	0.595768	0.580412	0.577222	0.581899	0.591212
237	C=C1C([C@H1](CCC2=CC(=C(OC)C(=C21)OC)OC)NCCCCCC)CC=CC(C(SC)=C)=O	0.424479	0.425794	0.428386	0.430052	0.430331	0.432275	0.433571	0.438835	0.434219	0.434219	0.424498	0.42701	0.430591	0.428479	0.427191	0.425243	0.430412	0.428756	0.424631	0.425532	0.436574	0.428761	0.424807	0.409365	0.427527	0.433703	0.434416	0.436893	0.441816	0.435149	0.438268	0.421293	0.438673	0.438979	0.441067	0.446286	0.439252	0.441615	0.43069	0.412634	0.421946	0.444513	0.450687	0.450805	0.45614	0.452022	0.45367	0.457383
238	C=C1C(C2=C(C=C(OC)C(=C2OC)OC)CC[C@@H1]1NC/C=C/C3=CC=CC=C3CC)=C(SC)C=O	0.452096	0.454057	0.454708	0.457961	0.455628	0.457415	0.456871	0.462545	0.457466	0.457466	0.45634	0.459299	0.466945	0.463327	0.462135	0.45786	0.4625	0.461859	0.461356	0.456276	0.476077	0.460928	0.457245	0.43014	0.458996	0.470375	0.473494	0.473022	0.482451	0.476793	0.478679	0.446643	0.476135	0.480535	0.481481	0.489374	0.480814	0.481181	0.465394	0.43409	0.444644	0.487889	0.506787	0.507623	0.505695	0.504269	0.504821	0.50906
240	C12=CCC(NC)=CC=C1C3=C(C=C(C(OC)=C3OC)OC)CC[C@@H1]2NCCCCCCCCCC=O	0.453059	0.456798	0.459215	0.459867	0.461027	0.461957	0.464048	0.466265	0.464653	0.464653	0.455589	0.462094	0.466306	0.462651	0.461446	0.456246	0.460938	0.460289	0.45716	0.45728	0.471084	0.457512	0.455635	0.433519	0.455556	0.466179	0.466667	0.467109	0.479304	0.469982	0.471014	0.444915	0.47734	0.477446	0.479276	0.489843	0.47946	0.479836	0.465621	0.441121	0.456098	0.495316	0.509153	0.510857	0.510675	0.507488	0.510638	0.511455
241	CNC(C(C)C)N[C@@H1]1C=2C(C3=C(C=C(OC)C(OC)=C3OC)CC1)=CC=C(C(=O)C=2)NC	0.810976	0.820122	0.817629	0.82622	0.81577	0.819423	0.815431	0.81825	0.816188	0.816188	0.781927	0.775074	0.769795	0.777531	0.777367	0.779598	0.775811	0.77548	0.775239	0.807837	0.79318	0.822706	0.796117	0.750572	0.824219	0.809415	0.80497	0.801047	0.779315	0.8012	0.796724	0.765497	0.766335	0.761099	0.757173	0.748454	0.760395	0.758234	0.914877	0.864821	0.833333	0.69411	0.677357	0.675831	0.685065	0.684416	0.677835	0.677999
243	C=C1C([C@H1](C2CC3=CC(=C(OC)C(=C31)OC)OC)NCCCCCC)CCC=CC(C(=C2)SC)=O	0.445896	0.447955	0.450434	0.452012	0.452292	0.454151	0.45539	0.4613	0.45601	0.45601	0.446716	0.448954	0.455946	0.453086	0.451852	0.449195	0.453144	0.451573	0.450185	0.450278	0.458128	0.442138	0.447724	0.42839	0.440101	0.44665	0.448148	0.450462	0.460317	0.451513	0.453538	0.44382	0.470127	0.47027	0.473054	0.473404	0.466147	0.467463	0.447174	0.425207	0.43995	0.470937	0.482938	0.484691	0.485114	0.481072	0.482578	0.487819
246	COC1=C(OC)C(OC)=CC=2CC[C@@H1](C3=CC(=O)C(NC)=CC=C3C=21)N4C=C(N=N4)CON	0.62492	0.62532	0.623724	0.628352	0.623567	0.624443	0.625716	0.624446	0.625318	0.625318	0.62612	0.62294	0.626346	0.628899	0.628662	0.624521	0.6277	0.626192	0.629371	0.628189	0.628481	0.617876	0.623731	0.624005	0.614137	0.622123	0.621742	0.622546	0.630257	0.625318	0.626743	0.59873	0.632262	0.631611	0.631966	0.635152	0.627993	0.630741	0.678244	0.682037	0.679333	0.942836	0.95	0.946003	0.963571	0.988423	0.962989	0.947961
247	C12=CC(C(NC)=CC=C1C3=C(C=C(C(OC)=C3OC)OC)CC[C@@H1]2NCCCCCCCCCC=O)SC	0.467366	0.47093	0.473256	0.473868	0.475	0.475886	0.477907	0.481718	0.478488	0.478488	0.469767	0.475116	0.483459	0.477378	0.475362	0.470383	0.474841	0.474233	0.476273	0.473043	0.487224	0.475371	0.473106	0.445433	0.472652	0.486168	0.488277	0.489486	0.502907	0.488876	0.491535	0.461224	0.498006	0.500568	0.503116	0.514092	0.499148	0.501133	0.482839	0.452808	0.473839	0.519613	0.539363	0.540993	0.540236	0.536216	0.540101	0.541643
248	C12=CCC(NC)=CC=C1C3=C(C=C(C(OC)=C3OC)OC)CC[C@@H1]2NCCC4CCCCC4=O	0.456561	0.460251	0.462642	0.464158	0.464435	0.466228	0.467424	0.47136	0.468022	0.468022	0.459056	0.465476	0.469643	0.466031	0.464839	0.460573	0.464328	0.46369	0.461447	0.463327	0.474374	0.461023	0.459941	0.43643	0.459096	0.470446	0.470906	0.473086	0.485137	0.475075	0.476077	0.448503	0.482216	0.482298	0.485814	0.496258	0.484302	0.484655	0.469851	0.443966	0.45959	0.49913	0.517908	0.519591	0.517755	0.51458	0.518561	0.520205
250	COC1=C(OC)C(OC)=CC=2CC[C@@H1](C3=CC(=O)C(NC)=CC=C3C=21)NCCC4CCCCC4	0.83242	0.841817	0.844949	0.842311	0.847298	0.849648	0.851214	0.849688	0.851997	0.851997	0.802147	0.788084	0.78797	0.796058	0.795903	0.801071	0.795609	0.796662	0.795008	0.831783	0.813546	0.84345	0.815326	0.770376	0.846586	0.825039	0.820355	0.816233	0.79761	0.816436	0.81312	0.783908	0.778665	0.773218	0.769121	0.757533	0.771223	0.770222	0.940262	0.89094	0.851351	0.693822	0.675763	0.674223	0.683553	0.682895	0.674055	0.676413
251	C12=CC(C(NC)=CC=C1C3=C(C=C(C(OC)=C3OC)OC)CC[C@@H1]2NCCC4=CC=CC=C4C)SC	0.465969	0.470383	0.470998	0.473318	0.471031	0.473623	0.472222	0.478588	0.472801	0.472801	0.469222	0.474566	0.482899	0.477681	0.475666	0.469838	0.474292	0.473684	0.476576	0.477629	0.487522	0.474807	0.472559	0.444905	0.47209	0.487345	0.489449	0.490654	0.504945	0.49092	0.493575	0.461538	0.496587	0.5	0.502547	0.51522	0.499432	0.501415	0.480557	0.450536	0.471554	0.518161	0.539621	0.541249	0.538764	0.534753	0.538634	0.541039
252	COC1=C(OC)C(OC)=CC=2CC[C@@H1](C3=CC(=O)C(NC)=CC=C3C=21)NCCC4=CC=CC=C4	0.844073	0.841897	0.839243	0.83805	0.837264	0.836735	0.836863	0.831128	0.836207	0.836207	0.813084	0.798622	0.797101	0.806774	0.806626	0.810559	0.804916	0.806005	0.807071	0.862371	0.821759	0.858537	0.826459	0.781051	0.860294	0.840855	0.83595	0.830218	0.813688	0.82904	0.824167	0.794553	0.783407	0.779155	0.77368	0.764372	0.77713	0.774801	0.9575	0.907692	0.863489	0.698489	0.677822	0.675163	0.686835	0.68505	0.678312	0.678478
254	CNC(C(C)O)N[C@@H1]1CC(C2=C(C=C(OC)C(OC)=C2OC)CC1)=CC=C(C(=O)C)NC	0.431877	0.434059	0.434783	0.434588	0.434866	0.435865	0.436224	0.437738	0.436862	0.436862	0.430032	0.435197	0.437817	0.436665	0.435391	0.430759	0.433101	0.433291	0.431919	0.435587	0.452046	0.438114	0.431198	0.415293	0.436925	0.445666	0.447233	0.446863	0.454373	0.446085	0.447284	0.422336	0.450093	0.451235	0.451474	0.464548	0.449722	0.449355	0.44345	0.42515	0.434023	0.455712	0.464964	0.465047	0.467026	0.465548	0.466269	0.470799
256	C12=CC(C(NC)=CC=C1C3=C(C=C(C(OC)=C3OC)OC)CC[C@@H1]2NCCC4=CC=CC=C4C)NC=O	0.465294	0.469759	0.470381	0.473592	0.470416	0.4739	0.471621	0.478923	0.472206	0.472206	0.467723	0.473131	0.478947	0.476274	0.475103	0.468347	0.472855	0.473099	0.47172	0.476218	0.486217	0.468937	0.472823	0.443978	0.467066	0.480735	0.482881	0.484118	0.496782	0.486998	0.487934	0.460813	0.495402	0.497136	0.499714	0.511654	0.5	0.501144	0.481786	0.450543	0.467456	0.512	0.530269	0.531915	0.528483	0.526197	0.529246	0.53083
257	C12=CCC(NC)=CC=C1C3=C(C=C(C(OC)=C3OC)OC)CC[C@@H1]2NCCC4=CC=CC=C4C	0.452842	0.457453	0.458107	0.460518	0.458158	0.460843	0.459411	0.464264	0.460012	0.460012	0.456246	0.461862	0.467829	0.464178	0.462974	0.456902	0.461585	0.460938	0.458683	0.464092	0.472607	0.459077	0.45716	0.433333	0.457125	0.469512	0.469982	0.470411	0.483483	0.474196	0.475212	0.447337	0.477954	0.478923	0.480747	0.492165	0.481808	0.482174	0.465382	0.43913	0.454103	0.493287	0.509714	0.511416	0.509499	0.506322	0.509466	0.511149
259	C=C1C2([C@@H1](NCCCCCCCCCC)CCC3=CC=C(OC)C(=C31)OC)OC=CC(C(=C2)NC)=O	0.497166	0.500566	0.502828	0.50509	0.504525	0.506222	0.507353	0.512719	0.507919	0.507919	0.499434	0.506201	0.510147	0.505922	0.505643	0.500848	0.508465	0.50451	0.507328	0.505085	0.512965	0.490006	0.506772	0.468732	0.487414	0.502838	0.507361	0.511878	0.515389	0.508772	0.51214	0.491208	0.540011	0.543272	0.54738	0.544255	0.540993	0.543684	0.500281	0.45667	0.480023	0.532895	0.56013	0.562534	0.554348	0.552117	0.557546	0.563212
260	C=C1C([C@H1](CCC2=CC(=C(OC)C(=C21)OC)OC)NCCCCCC)=CC(C(SC)=C)=O	0.435692	0.439533	0.441989	0.442673	0.443831	0.444785	0.4469	0.45187	0.447514	0.447514	0.440074	0.446756	0.448381	0.447304	0.446078	0.440761	0.446483	0.443154	0.442683	0.440098	0.450549	0.439024	0.43849	0.419924	0.436991	0.445337	0.445946	0.446483	0.462523	0.451077	0.453096	0.431832	0.452169	0.452395	0.454331	0.466002	0.457838	0.459172	0.444988	0.425761	0.437771	0.474807	0.486705	0.487594	0.490654	0.488331	0.487224	0.489867
261	C1=C2C([C@H1](CCC3=CC(=C(OC)C(=C32)OC)OC)NCCCCCC)C=CC(C(=C1)SC)=O	0.454156	0.457038	0.459476	0.461023	0.461304	0.463132	0.464351	0.469264	0.46496	0.46496	0.454047	0.458838	0.460423	0.456745	0.456416	0.454711	0.460327	0.459673	0.456522	0.459295	0.47234	0.457764	0.454985	0.429994	0.454885	0.465602	0.469688	0.473716	0.475271	0.46854	0.470481	0.445938	0.481261	0.483986	0.487574	0.485998	0.475516	0.476778	0.460606	0.433125	0.448318	0.491466	0.502008	0.503725	0.505214	0.504635	0.506066	0.508641
263	CC(C)(C)C(OC1=CC=CC2=C(OC)C(OC)=C(OC)C=C2CC[C@H1](NC(=O)C)C1=CC=O)=O	0.44092	0.442105	0.442795	0.444376	0.442866	0.444719	0.445062	0.450062	0.445679	0.445679	0.437307	0.44226	0.443899	0.440147	0.43892	0.438001	0.440221	0.442189	0.439069	0.449814	0.4613	0.442551	0.450835	0.42602	0.441419	0.449782	0.450372	0.453589	0.465274	0.453755	0.456683	0.437032	0.466184	0.467228	0.471789	0.486244	0.466627	0.468825	0.446704	0.420115	0.431409	0.453263	0.47235	0.472414	0.470998	0.469565	0.471098	0.472078
264	CC(C)C(=O)OCCC=C1[C@H1](CCC2=CC(OC)=C(OC)C(OC)=C2C1=CCN)SC=O	0.450031	0.452934	0.453602	0.455156	0.455433	0.456376	0.456707	0.460743	0.457317	0.457317	0.450825	0.45565	0.458131	0.455319	0.455873	0.452381	0.456258	0.455596	0.455981	0.45521	0.469189	0.449969	0.451789	0.431975	0.446173	0.460591	0.462906	0.466952	0.473939	0.458206	0.458409	0.440906	0.469436	0.471319	0.476669	0.48563	0.471598	0.472009	0.449486	0.429737	0.441519	0.488482	0.502597	0.504323	0.502326	0.500872	0.503188	0.500576
265	C=1C(C)(C)C(OC2=CC=CC3=C(OC)C(OC)=C(OC)C=C3CC[C@H1](NC(=O)C)C2=CC=1O)SC	0.458908	0.462597	0.46324	0.465631	0.463284	0.46595	0.465394	0.470203	0.46599	0.46599	0.456172	0.459123	0.46327	0.460534	0.460214	0.45682	0.460581	0.460808	0.459443	0.466547	0.477612	0.459854	0.468377	0.443217	0.457038	0.465745	0.467105	0.471045	0.485731	0.475676	0.480216	0.456077	0.481072	0.482879	0.487254	0.508121	0.491822	0.495627	0.464328	0.439264	0.450569	0.489349	0.508187	0.509019	0.50625	0.504827	0.508792	0.508752
266	CC(C)(C)COC1=CC=C2C3=C(OC)C(OC)=C(OC)C=C3CC[C@@H1](C2=CC1=O)SC=O	0.670614	0.667157	0.666422	0.668132	0.667399	0.665936	0.66618	0.664488	0.66691	0.66691	0.660806	0.65677	0.655844	0.657723	0.659884	0.660088	0.658696	0.656998	0.655821	0.66302	0.66185	0.706288	0.664967	0.690754	0.699387	0.712557	0.716654	0.718468	0.682839	0.695394	0.69174	0.636297	0.655944	0.655076	0.657658	0.632997	0.649792	0.64714	0.664	0.692128	0.67487	0.630832	0.614489	0.613153	0.616188	0.618705	0.615735	0.610968
268	O=C(C=CNCC(=O)OCCN[C@H1]1)CCC2=C(C(OC)=C(OC)C(OC)=C2)C3=CC=C(NC)C(=O)C=C13	0.717754	0.712566	0.711712	0.713428	0.711394	0.71236	0.713858	0.710565	0.713323	0.713323	0.70849	0.7	0.696389	0.706101	0.704613	0.706367	0.703264	0.702823	0.702743	0.711826	0.706361	0.735614	0.704833	0.698833	0.736719	0.726996	0.721929	0.721139	0.707692	0.717179	0.717164	0.674349	0.68679	0.683357	0.683509	0.67033	0.680282	0.682105	0.808511	0.80897	0.771226	0.672891	0.64888	0.648489	0.655333	0.654667	0.650331	0.649539
269	C1=2[C@H1]CCC3=CC(OC)=C(OC)C(OC(CC)=O)=C3C1=CC=C(C(C=2)=O)SCNC(=O)CSC	0.764524	0.760184	0.760553	0.755539	0.760153	0.757066	0.757252	0.750946	0.758015	0.758015	0.754601	0.747918	0.74529	0.746404	0.747536	0.752294	0.744713	0.748294	0.742836	0.755149	0.746426	0.67988	0.758384	0.789088	0.68322	0.695104	0.700444	0.696035	0.666667	0.674909	0.672688	0.729771	0.820884	0.83003	0.822508	0.74465	0.754386	0.749637	0.665945	0.682272	0.668138	0.63618	0.628072	0.627742	0.629896	0.630307	0.626217	0.627666
270	OC(CCC(C)C)OCC1=CN(N=N1)[C@H1]2CCC3=CC(OC)=C(OC)C(OC)=C3C4=CC=C(NC)C(=O)C=C24	0.621928	0.623352	0.622807	0.627353	0.623669	0.626566	0.625782	0.629606	0.625391	0.625391	0.622097	0.619018	0.62236	0.624844	0.62461	0.620539	0.624688	0.622195	0.627341	0.627193	0.6285	0.613968	0.622818	0.617781	0.609276	0.618182	0.61783	0.61964	0.628237	0.62336	0.627805	0.598253	0.631227	0.630593	0.631928	0.636038	0.629988	0.63565	0.668802	0.666443	0.66645	0.913745	0.925394	0.92292	0.934211	0.957924	0.933747	0.922131
272	O=CCN(CC=C)N(OCC)O[C@H1]1CCC2=CC(OC)=C(OC)C(OC)=C2C=CC=C(NC)C(=O)C=C1	0.422222	0.424479	0.425228	0.426901	0.4244	0.427273	0.42487	0.429218	0.425518	0.425518	0.428758	0.434048	0.436729	0.431818	0.43238	0.430438	0.432836	0.43024	0.429773	0.42885	0.434389	0.430287	0.424419	0.408877	0.430007	0.436184	0.435948	0.436565	0.438743	0.433876	0.434219	0.417158	0.43206	0.432399	0.433623	0.432763	0.433562	0.433271	0.430331	0.41503	0.418742	0.450529	0.454819	0.454928	0.457699	0.457978	0.457853	0.457177
273	N([C@@H1]1C=2CC3=C(C(OC)=C(OC)C=C3CC1)OC=CC=C(NC)CC=2)=O	0.41929	0.422563	0.423333	0.423154	0.423435	0.424484	0.42392	0.423662	0.424585	0.424585	0.425033	0.426676	0.433223	0.429142	0.427811	0.42485	0.427339	0.42374	0.42611	0.423256	0.417705	0.410135	0.416887	0.414296	0.410726	0.416389	0.414408	0.415132	0.418559	0.418928	0.421226	0.414094	0.42492	0.422589	0.424779	0.434755	0.431949	0.434395	0.411687	0.40692	0.411922	0.42929	0.433435	0.434466	0.436118	0.432863	0.431098	0.434915
274	OC(CCC(C)C)OCC1=CN(N=N1)[C@H1]CCC2=CC(OC)=C(OC)C(OC)=C2C=CC=C(C(C)N)C	0.408754	0.410188	0.410977	0.411765	0.411096	0.413102	0.411608	0.417055	0.412275	0.412275	0.403204	0.407825	0.409662	0.405567	0.406105	0.403065	0.404762	0.402116	0.403567	0.412826	0.421438	0.404226	0.409302	0.402371	0.401914	0.404953	0.40492	0.406623	0.41481	0.410393	0.414618	0.404456	0.407668	0.408137	0.410386	0.417817	0.41109	0.416295	0.402246	0.396936	0.399462	0.461939	0.476251	0.475379	0.48141	0.493213	0.483376	0.476884
276	C=C1C(C2=C(C=C(OC)C(=C2OC)OC)CC[C@@H1]1N3C=C(N=N3)C4=CC=CC=C4)=CC=C(NC)C=O	0.462609	0.467014	0.46763	0.470792	0.467667	0.471098	0.469706	0.476053	0.470283	0.470283	0.465009	0.471198	0.472685	0.472591	0.472286	0.466474	0.471774	0.470317	0.467279	0.469129	0.480669	0.471353	0.46751	0.439858	0.468639	0.478667	0.481654	0.482879	0.50232	0.483984	0.486643	0.461583	0.48478	0.486517	0.489076	0.509254	0.489302	0.491297	0.479722	0.450595	0.471588	0.542627	0.557812	0.558559	0.557955	0.554736	0.560408	0.559255
277	C=C1C([C@H1](CCC2=CC(=C(OC)C(=C21)OC)OC)NCCCCCCCCCCC)C=CC(CNC)=O	0.425407	0.427644	0.43024	0.431907	0.432187	0.434134	0.435432	0.439767	0.43608	0.43608	0.422654	0.423348	0.427838	0.425723	0.425354	0.4234	0.428571	0.426916	0.422806	0.429218	0.434727	0.431607	0.424807	0.408422	0.429427	0.434641	0.435348	0.439689	0.445513	0.437947	0.438268	0.419439	0.441379	0.441672	0.445551	0.442743	0.435674	0.435374	0.424262	0.403204	0.412719	0.440959	0.448955	0.450805	0.452625	0.448525	0.451923	0.454763
278	C=C1C(C2=CC=C(C(=O)C=C2[C@H1](CC1)N3C=C(N=N3)C=CC=CC=N)C=C)OCNC(OC)=O	0.443135	0.447647	0.449148	0.449794	0.450911	0.450969	0.45044	0.452632	0.450176	0.450176	0.449882	0.455399	0.455237	0.455934	0.455614	0.451385	0.455986	0.454492	0.450614	0.450704	0.458163	0.432721	0.44743	0.420516	0.430778	0.439625	0.441074	0.442442	0.463642	0.44425	0.448718	0.438607	0.463694	0.465527	0.468182	0.485244	0.471666	0.477117	0.448598	0.417516	0.444313	0.552773	0.582107	0.582844	0.583383	0.580913	0.584024	0.581765
280	OC1=C(C=CC=C1)C=2N=NN(C=2)[C@H1]3CCC4=CC(OC)=C(OC)C(OC)=C4C5=CC=C(NC)C(=O)C=C35	0.619674	0.620087	0.618544	0.623053	0.618397	0.620261	0.621504	0.620284	0.621118	0.621118	0.624922	0.622829	0.625155	0.630692	0.629445	0.624375	0.626476	0.626011	0.629123	0.625935	0.626238	0.61378	0.619579	0.615484	0.610127	0.617978	0.618634	0.617429	0.635018	0.623134	0.625542	0.595164	0.627037	0.627404	0.625822	0.642601	0.628761	0.631453	0.667304	0.66489	0.664942	0.90675	0.872679	0.871693	0.879357	0.877428	0.879092	0.874585
281	NC(=C(N=NCC(=O)CCC=C1N=CC(C(OC(C)=O)=CC=C1C2=C(OC)C)(OC)COC)C)C2CCOF	0.425594	0.429232	0.430716	0.432198	0.431621	0.43418	0.434507	0.437536	0.434256	0.434256	0.429728	0.436888	0.439263	0.434082	0.434582	0.430387	0.436636	0.433506	0.437212	0.433103	0.438002	0.417736	0.432432	0.405549	0.414962	0.430475	0.436921	0.443287	0.449284	0.436742	0.439516	0.42029	0.455317	0.458804	0.465576	0.474215	0.461538	0.464447	0.433583	0.404255	0.433333	0.465286	0.486516	0.488999	0.482034	0.483121	0.484547	0.484615
282	N1=CC=C(C2=C1)COC3=CC=C4C5=C(OC)C(OC)=C(OC)C=C5CC[C@@H1](C4=CC3=O)N2	0.710063	0.706499	0.705718	0.706128	0.704245	0.706333	0.704167	0.703525	0.703678	0.703678	0.712281	0.724597	0.707958	0.711204	0.712195	0.713885	0.708536	0.711699	0.712796	0.708217	0.700825	0.754206	0.704089	0.723404	0.747623	0.743205	0.744484	0.742392	0.767162	0.744847	0.741002	0.675676	0.691744	0.690728	0.689723	0.701375	0.695681	0.693985	0.725806	0.742751	0.730329	0.628859	0.629426	0.629111	0.625153	0.627535	0.625688	0.628049
283	NC1=CN(N=N1)[C@H1]2CCC3=C(C(OC)=C(OC)C(OC)=C3)C4=CC=C(NC)C(C=C24)=O	0.631475	0.631854	0.630208	0.634941	0.6311	0.630929	0.63329	0.63301	0.632878	0.632878	0.63268	0.628313	0.63073	0.635478	0.634178	0.63103	0.633182	0.631647	0.63489	0.635831	0.632903	0.625414	0.629126	0.63519	0.622679	0.627528	0.626053	0.625806	0.633632	0.629702	0.631137	0.603627	0.629467	0.627805	0.627171	0.634462	0.630231	0.632005	0.688338	0.698727	0.689632	0.972388	0.919071	0.915207	0.932191	0.934239	0.926241	0.919775
284	NC1=C(N=NC1C(=O)CCC=CC=C2C3=C(OC)C(OC)=C(OC)C=C3CC[C@H1](CC2N)CN)C=O	0.457421	0.45851	0.459165	0.461585	0.46098	0.461027	0.464005	0.467109	0.46461	0.46461	0.461725	0.46824	0.469807	0.465257	0.46582	0.462379	0.464415	0.465538	0.466787	0.466061	0.475499	0.444988	0.462606	0.444167	0.443015	0.458131	0.461306	0.465299	0.466945	0.456679	0.456014	0.451888	0.481678	0.484384	0.488824	0.493302	0.479436	0.479813	0.458534	0.437461	0.451613	0.494435	0.505714	0.50656	0.509815	0.508367	0.508913	0.511468
285	C[C@@H1](C1=CCC(SC)=CC=C1C2=C(OC)C(OC)=C(C=C2CC)OCOCC=CCSC=O)O	0.448466	0.451376	0.452934	0.452715	0.452105	0.454823	0.453382	0.458308	0.453991	0.453991	0.450153	0.45676	0.456588	0.453771	0.453439	0.450825	0.456482	0.453163	0.454435	0.455433	0.467643	0.45109	0.452005	0.433061	0.44819	0.459926	0.463145	0.464504	0.470624	0.465602	0.470264	0.443762	0.467933	0.468953	0.470831	0.483284	0.479738	0.483641	0.457648	0.438963	0.447936	0.494062	0.508121	0.508975	0.508772	0.50907	0.508741	0.509576
286	N=C=C(N=NC(C(C)OC)[C@H1]CCC1=CC(OC)=C(OC)C(OC)=C1C2=CC=C(NC)C=O)C=C2	0.433673	0.436745	0.438374	0.438174	0.438452	0.440355	0.44071	0.442198	0.441344	0.441344	0.430925	0.437855	0.435028	0.433879	0.435331	0.43074	0.434865	0.435057	0.430991	0.437342	0.45	0.436163	0.432977	0.421916	0.43498	0.439056	0.440635	0.440303	0.443267	0.440431	0.440731	0.422392	0.443696	0.444851	0.445995	0.444976	0.446886	0.446537	0.440582	0.428949	0.441366	0.467033	0.479477	0.481283	0.477246	0.478417	0.478209	0.480952
288	C=C1C(C2=C(C(=C(OC)C=C2CC[C@@H1]1N3C=C(N=N3)C4=CC)CC)N4O)COC=CC=C(CON)C	0.493583	0.498397	0.500534	0.501869	0.502137	0.502936	0.504004	0.509072	0.504538	0.504538	0.492545	0.500531	0.504251	0.500266	0.5	0.49388	0.501063	0.498937	0.5	0.501867	0.51334	0.480429	0.50587	0.465946	0.476395	0.495726	0.499201	0.50426	0.520468	0.501332	0.506922	0.494358	0.534884	0.536354	0.542677	0.555147	0.539884	0.545695	0.502128	0.457728	0.489293	0.570591	0.602537	0.60486	0.601276	0.599044	0.602653	0.604762
289	C=C1C(C2=CC=CC(=O)C=C2[C@@H1](N3C=C(N=N3)C4=CC=CC=N4)CC1)NC=C(OC)C(OC)SCOC	0.467797	0.473744	0.475169	0.476593	0.476862	0.476888	0.477183	0.481711	0.476914	0.476914	0.480977	0.489518	0.484234	0.487542	0.48641	0.482406	0.488398	0.488662	0.483089	0.47662	0.483708	0.467963	0.475014	0.442407	0.46533	0.478434	0.481335	0.482525	0.503102	0.483597	0.489542	0.46267	0.49917	0.500827	0.5033	0.522289	0.506091	0.511345	0.481127	0.447005	0.472396	0.582184	0.603731	0.605308	0.598751	0.597277	0.602041	0.605204
290	C1=C2C(C3=C(C=C(OC)C=C3CC[C@@H1]2N4C=C(N=N4)C=CC)OCOC)OC=CC=C(C1=O)C	0.486119	0.490385	0.491803	0.494064	0.493499	0.49435	0.49548	0.499154	0.496045	0.496045	0.489253	0.495211	0.499155	0.497459	0.498021	0.489831	0.494932	0.493521	0.497182	0.492386	0.499438	0.475513	0.491564	0.46008	0.473744	0.485037	0.487901	0.489899	0.510387	0.496045	0.498592	0.483523	0.512168	0.513782	0.516218	0.539437	0.522463	0.52518	0.487668	0.453868	0.483248	0.551089	0.578599	0.580165	0.578889	0.578333	0.577753	0.579151
291	C=C1C([C@H1](CCC2=CC(=C(OC)C(=C21)OC)OC)NCCCCCCCCCCC)C=CCC(NC)=O	0.421742	0.424005	0.426614	0.428292	0.428571	0.430528	0.431833	0.436198	0.432485	0.432485	0.418075	0.418814	0.423325	0.421189	0.420814	0.418831	0.424047	0.423301	0.418275	0.424675	0.430233	0.430769	0.423027	0.407407	0.428571	0.432895	0.43268	0.436115	0.443871	0.436233	0.4375	0.418528	0.437028	0.437343	0.44035	0.440271	0.43223	0.432836	0.4234	0.403096	0.411765	0.436689	0.443978	0.444976	0.447608	0.444377	0.447797	0.450662
292	C=1=C2C(C3=C(C=C(OC)C=C3CC[C@@H1]2N4C=C(N=N4)C=CC)OCOC)OC=CC=CC=1O	0.479679	0.483152	0.484589	0.486024	0.486301	0.486317	0.489155	0.489483	0.489726	0.489726	0.484554	0.488902	0.493736	0.492009	0.491719	0.484295	0.491168	0.489738	0.490888	0.48604	0.494031	0.46893	0.486072	0.459207	0.467128	0.477765	0.479841	0.48356	0.500849	0.488876	0.492316	0.475344	0.505304	0.506118	0.510272	0.532851	0.515677	0.518436	0.478802	0.448696	0.475917	0.538462	0.566278	0.568736	0.564732	0.565922	0.565387	0.565965
293	C1=C2C(C3=CC=CC(=O)C=C3[C@H1](CC2)N4C=C(N=N4)C=CC=CC=N)(OC)C(OC)=C1OCNC	0.508753	0.514316	0.515633	0.518558	0.517223	0.518813	0.518264	0.524087	0.517989	0.517989	0.515666	0.522775	0.525675	0.522523	0.521463	0.516985	0.525729	0.521993	0.523028	0.519343	0.527513	0.494155	0.520106	0.47754	0.490957	0.510864	0.515071	0.518479	0.531299	0.513984	0.520317	0.503185	0.547931	0.554217	0.558054	0.573668	0.555322	0.561091	0.519556	0.471718	0.502121	0.596912	0.632945	0.636123	0.62666	0.626993	0.627981	0.630883
294	C=C1C2(C3=C(C=C(OC)C=C3CC[C@@H1]1N4C=C(N=N4)C=CC)OCOC)OC=CC=C(NC)C2=O	0.517895	0.521008	0.523109	0.524409	0.524685	0.525459	0.527311	0.532283	0.527836	0.527836	0.521556	0.527778	0.534664	0.529937	0.52969	0.522859	0.529906	0.527006	0.53043	0.524384	0.534872	0.502634	0.528332	0.490165	0.497893	0.516789	0.522537	0.528302	0.544218	0.528639	0.533333	0.513969	0.558273	0.562078	0.568312	0.590412	0.569713	0.573813	0.522193	0.480423	0.515295	0.583637	0.615623	0.618727	0.613625	0.611429	0.613271	0.617815
295	C1=C2C(C3=C(C=C(OC)C=C3CC[C@@H1]2N4C=C(N=N4)C=CC)OCOC)OC=CC=C(C1=O)NC	0.489338	0.493557	0.494961	0.4972	0.496641	0.497482	0.498601	0.502235	0.499161	0.499161	0.491601	0.498326	0.501394	0.499721	0.50028	0.49217	0.498048	0.495817	0.498606	0.495531	0.504183	0.478016	0.494708	0.464428	0.476271	0.488255	0.490251	0.492222	0.51419	0.499161	0.502513	0.485939	0.518396	0.519978	0.52238	0.546301	0.526953	0.530478	0.493326	0.460751	0.488176	0.558824	0.586945	0.587623	0.585541	0.584989	0.584387	0.586623
296	C=C1C(C2=C(C=C(OC)C=C2CC[C@@H1]1N3C=C(N=N3)CCC)COCO)C=CC=C(NC)C=O	0.425211	0.429001	0.429688	0.431231	0.429772	0.430714	0.431055	0.433353	0.430797	0.430797	0.429518	0.435252	0.438586	0.436637	0.437162	0.429345	0.435851	0.430024	0.433014	0.431314	0.435561	0.425688	0.431478	0.406038	0.422794	0.427711	0.431832	0.435851	0.448153	0.439421	0.444043	0.423123	0.442566	0.44619	0.450639	0.461316	0.451519	0.456243	0.430108	0.402957	0.424591	0.482921	0.524312	0.526932	0.504662	0.509357	0.50552	0.51867
298	C=C1C(C2=CC=C(C(=O)C=C2[C@@H1](N3C=C(N=N3)C4=NC=CC=C4)CC1)NC)=C(OC)C(OC)=COC	0.484915	0.49068	0.492055	0.493428	0.493699	0.494524	0.4948	0.498361	0.49453	0.49453	0.493678	0.50192	0.50082	0.500823	0.499726	0.495055	0.501645	0.500274	0.498086	0.494253	0.506849	0.476269	0.495899	0.458079	0.473742	0.489572	0.493158	0.495904	0.512541	0.493712	0.498635	0.484848	0.52242	0.526429	0.529602	0.544039	0.523425	0.527703	0.511872	0.471645	0.500278	0.608769	0.633038	0.633647	0.626459	0.628619	0.62694	0.632687
300	C1=C2C(C3=CC=C(C(C=C3[C@H1](CC2)N4C=C(N=N4)C5=NC=CC=C5O)N)C=C)(C(=C1OC)OC)OC	0.483941	0.485621	0.486985	0.489154	0.488612	0.490239	0.490515	0.495666	0.491057	0.491057	0.486149	0.495119	0.497291	0.490801	0.489719	0.488322	0.490811	0.491874	0.494583	0.4924	0.500813	0.476974	0.494845	0.456498	0.473655	0.490185	0.496187	0.500544	0.515464	0.496736	0.500815	0.479826	0.51955	0.525161	0.529947	0.546766	0.525442	0.528877	0.49837	0.45937	0.484418	0.555616	0.579648	0.582845	0.574866	0.57349	0.577149	0.576821
301	C12=CC([C@@H1]1NCC3=CC=C(C)C=C3CCCC)C(SC)=CC2O	0.390625	0.394805	0.396496	0.399091	0.397536	0.400389	0.39987	0.405178	0.400518	0.400518	0.396226	0.397163	0.400773	0.400388	0.4	0.398829	0.397808	0.396129	0.400258	0.396507	0.396795	0.377865	0.393179	0.366356	0.378289	0.387055	0.387138	0.387964	0.391661	0.386145	0.389386	0.386423	0.406133	0.405725	0.407063	0.408313	0.400744	0.403216	0.384665	0.356717	0.362179	0.386804	0.400354	0.401413	0.398456	0.396204	0.398817	0.39847
305	O=C(OCC)CN(CCO)N[C@H1]1CCC2=CC(OC)=C(OC)C(OC)=C2C3=CC=C(NC)C(=O)C=C13	0.730435	0.727862	0.725772	0.727403	0.724212	0.725125	0.725322	0.720881	0.724803	0.724803	0.727666	0.722934	0.719348	0.725196	0.725	0.725575	0.726106	0.722024	0.724359	0.724607	0.725337	0.729809	0.72151	0.754373	0.72955	0.721783	0.717035	0.713881	0.702497	0.716216	0.716207	0.692308	0.704638	0.70122	0.697847	0.692715	0.700542	0.70108	0.807922	0.856452	0.828462	0.694204	0.677522	0.674936	0.686287	0.683463	0.676923	0.67709
307	O=C(O)C=C(OC)CC=C1C(C2=C(OC)C(OC)=C(OC)C=C2C=3C[C@@H1]1N=CC=3S)C	0.474517	0.478083	0.479556	0.481027	0.47958	0.482195	0.482497	0.487179	0.483081	0.483081	0.474329	0.480535	0.48374	0.480233	0.47907	0.475802	0.481116	0.478791	0.479977	0.482779	0.491841	0.47653	0.481094	0.450864	0.472933	0.487331	0.491187	0.493263	0.497971	0.490035	0.492694	0.469208	0.496583	0.500853	0.503401	0.515237	0.502847	0.503973	0.477101	0.44273	0.458673	0.515598	0.534521	0.537006	0.535354	0.532213	0.5301	0.535933
308	O=C(O)C=C(OC)CC=C1C(C2=C(OC)C(OC)=C(OC)C=C2C=3C[C@@H1]1N=CC=3SC)=O	0.497412	0.501722	0.502294	0.504587	0.502291	0.504871	0.504293	0.509725	0.504865	0.504865	0.499713	0.505714	0.510577	0.506293	0.505149	0.501147	0.505425	0.503141	0.505997	0.506307	0.515169	0.49709	0.505432	0.473715	0.494461	0.510995	0.514714	0.517559	0.527158	0.509185	0.511734	0.492228	0.528716	0.533746	0.537037	0.549469	0.530601	0.531617	0.501425	0.467366	0.48596	0.543928	0.562947	0.565385	0.564856	0.561704	0.561191	0.563496
309	O=C(C)N[C@@H1]1CC(C2=C(C(OC)=C(OC)C=C2CC1)OC(CC)=O)=CC=C(SC)C(=O)C	0.448363	0.45135	0.452949	0.451815	0.453008	0.453976	0.454318	0.456644	0.454944	0.454944	0.444653	0.449627	0.452174	0.449284	0.448941	0.445347	0.447548	0.450467	0.446373	0.452783	0.466208	0.455712	0.452901	0.423348	0.454604	0.47318	0.48023	0.480635	0.473848	0.467803	0.469811	0.442623	0.495658	0.50217	0.503086	0.485852	0.475929	0.477231	0.460526	0.430233	0.441436	0.475361	0.487405	0.487434	0.490533	0.48818	0.487059	0.49061
310	O=C(O)C=C(OC)CC=C1C(C2=C(OC)C(OC)=C(OC)C=C2C=3C[C@@H1]1N=CC=3S)C=O	0.479633	0.483963	0.485404	0.487693	0.48627	0.488838	0.48913	0.494568	0.489703	0.489703	0.480274	0.488027	0.490319	0.487735	0.486594	0.481714	0.486902	0.486317	0.487472	0.487707	0.49743	0.481675	0.487735	0.454016	0.47816	0.493072	0.496834	0.500575	0.505976	0.497412	0.500861	0.47444	0.506159	0.510341	0.514509	0.523572	0.511472	0.513393	0.485487	0.448576	0.469108	0.528228	0.549203	0.551648	0.548423	0.545304	0.544854	0.552313
311	O=C(C)N[C@@H1]1C2=CCC(SC)=CC=C2C3=C(C(OC)=C(OC)C=C3CC1)OCOO	0.470588	0.473341	0.474837	0.476331	0.474867	0.477515	0.476078	0.482575	0.476669	0.476669	0.470414	0.476724	0.479976	0.479031	0.47785	0.47104	0.476443	0.474087	0.475294	0.478107	0.490823	0.477025	0.479031	0.4474	0.473366	0.486228	0.488372	0.489602	0.502364	0.494322	0.49702	0.468694	0.500871	0.500867	0.502591	0.515482	0.509884	0.511884	0.48284	0.449636	0.463183	0.508893	0.525576	0.527232	0.525481	0.52319	0.525395	0.527856
312	O=C(C1)N[C@@H1]2CC(C3=C(C(OC)=C(OC)C=C3CC2)OC(CC)=O)=CC=C(SC)C1=O	0.459127	0.46201	0.464461	0.462431	0.465401	0.465443	0.466667	0.468902	0.467278	0.467278	0.458104	0.462895	0.466261	0.462568	0.462241	0.458766	0.460838	0.464634	0.460558	0.46337	0.477384	0.462836	0.465244	0.431336	0.461779	0.479801	0.487578	0.487941	0.484793	0.476308	0.478234	0.454433	0.507888	0.514251	0.515097	0.502364	0.490149	0.491374	0.470049	0.436284	0.449693	0.485899	0.5	0.50086	0.50406	0.501738	0.498848	0.503163
313	O=C(C)N[C@@H1]1C2=CCC(SC)=CC=C2C3=C(C(OC)=C(OC)C=C3CC1)OC=O	0.467703	0.470483	0.47199	0.473496	0.472024	0.474687	0.473246	0.479786	0.473841	0.473841	0.466667	0.472156	0.476303	0.474466	0.473278	0.467301	0.472749	0.470379	0.470727	0.474405	0.487195	0.470553	0.474466	0.440801	0.468655	0.484318	0.486486	0.486842	0.496142	0.487103	0.488942	0.463152	0.501756	0.502624	0.504358	0.512111	0.501166	0.502323	0.478287	0.443902	0.457637	0.504614	0.519752	0.521421	0.520478	0.519909	0.521271	0.521174
314	OC(OC(C)CC)CC(NCC1=CN(N=N1)[C@H1]C2CC3=CC(OC)=C(OC)C(OC)=C3C4=CC=CC(=O)C=C24)NC=O	0.625661	0.62607	0.625493	0.625984	0.625328	0.625164	0.624346	0.624104	0.625	0.625	0.626895	0.627861	0.627119	0.627618	0.62844	0.626316	0.631717	0.623775	0.625979	0.627953	0.624026	0.626005	0.626553	0.620314	0.624328	0.625989	0.628778	0.628515	0.63961	0.630335	0.631785	0.600785	0.622868	0.625315	0.625705	0.638178	0.623663	0.624451	0.626797	0.620219	0.633511	0.667518	0.675155	0.675759	0.693232	0.679849	0.677701	0.680997
315	O=CC(OOC1=C)C=CC=C1OC(=O)N[C@H1]2CCC3=CC(OC)=C(OC)C(OC)=C3C4=CC=C(NC)C(=O)C=C24	0.734525	0.734428	0.733607	0.73397	0.733288	0.734151	0.733152	0.731212	0.732653	0.732653	0.734247	0.729675	0.72973	0.735374	0.735194	0.733424	0.7327	0.733515	0.733379	0.740766	0.72379	0.747368	0.74726	0.702232	0.747183	0.744138	0.740589	0.736234	0.735255	0.739754	0.742001	0.719178	0.739102	0.736704	0.732073	0.726573	0.730366	0.733029	0.819672	0.772926	0.751046	0.680477	0.682511	0.682067	0.683661	0.683047	0.676829	0.675971
316	OC(OC(C)CC)CC=1OCCC=C2[C@H1](CCC3=C(C(OC)=C(OC)C(OC)=C3)C2=CC=1)NSC=O	0.466942	0.470554	0.472042	0.472663	0.472075	0.473839	0.473282	0.478006	0.47387	0.47387	0.472845	0.478261	0.483245	0.479694	0.479388	0.473467	0.480588	0.477366	0.475103	0.473561	0.486185	0.474159	0.471897	0.44994	0.469633	0.484217	0.48724	0.490231	0.504717	0.486086	0.487906	0.460721	0.492812	0.494556	0.497999	0.513406	0.5	0.500287	0.477393	0.454821	0.470868	0.526012	0.538983	0.540632	0.540741	0.539294	0.542354	0.539548
317	O=C(C1=C(C(OCC)=O)N(N=N1)[C@@H1]C2=C3C(C(NC)=CC=C2C4=C(C(OC)=C(OC)C=C4CC3)OC)=O)O	0.574631	0.576132	0.575704	0.578052	0.575615	0.577374	0.576698	0.579439	0.577283	0.577283	0.574956	0.576182	0.573837	0.577778	0.576608	0.575455	0.582308	0.57904	0.581967	0.579812	0.586893	0.568709	0.579625	0.551559	0.565217	0.5769	0.579565	0.579532	0.58885	0.582844	0.587097	0.557444	0.590389	0.592698	0.593182	0.59831	0.592128	0.595672	0.618705	0.593461	0.607013	0.705314	0.728894	0.729377	0.72624	0.733934	0.723379	0.730518
318	C1[C@@H1](C2=CC(C(NC)=CC=C2C3=C(OC)C(OC)=C(C=C3C1)O)C)ONC(C(=O)O)=CNC	0.464938	0.468548	0.469172	0.471521	0.469208	0.471831	0.470416	0.475132	0.471002	0.471002	0.472566	0.480588	0.483833	0.479412	0.478235	0.474057	0.481176	0.477086	0.476553	0.474148	0.482415	0.465075	0.467328	0.445312	0.463196	0.480404	0.481678	0.48467	0.48863	0.47967	0.480634	0.458726	0.491671	0.494273	0.498571	0.504535	0.489435	0.489761	0.473653	0.451906	0.469715	0.5126	0.525756	0.52826	0.527386	0.525959	0.528153	0.528884
319	C1=2[C@H1](CCC3=CC(OC)=C(OC)C(OC)=C3C1=CC=C(C(=O)C=2)NCO)C(C(OC)=O)NC(=O)CNC	0.637615	0.643325	0.644866	0.644256	0.645752	0.646636	0.646867	0.650814	0.646445	0.646445	0.632401	0.630155	0.636774	0.635188	0.632838	0.631818	0.635013	0.632429	0.632495	0.651604	0.637887	0.637027	0.640493	0.62938	0.637575	0.640052	0.642764	0.64244	0.637524	0.64216	0.642487	0.615984	0.639447	0.641828	0.641121	0.640221	0.641202	0.642946	0.692308	0.687413	0.694823	0.681876	0.674618	0.677262	0.682972	0.679234	0.673006	0.680368
320	C1[C@@H1](C2=CC(C(NC)=CC=C2C3=C(OC)C(OC)=C(C=C3C1)O)C)NC(C(O)=O)=CC(=O)ONC=O	0.478413	0.482819	0.483421	0.487478	0.48344	0.486911	0.48462	0.491004	0.4852	0.4852	0.482517	0.489547	0.493612	0.490983	0.48982	0.48312	0.487536	0.488669	0.485532	0.484901	0.496516	0.478723	0.483218	0.454923	0.476021	0.489449	0.490665	0.495338	0.504338	0.495617	0.496508	0.472271	0.507123	0.508802	0.513897	0.52054	0.509091	0.509338	0.489547	0.45888	0.475439	0.521788	0.540556	0.542175	0.541433	0.53829	0.543017	0.543684
321	C1[C@@H1](C2=CC(C(SC)=CC=C2C3=C(OC)C(OC)=C(C=C3C1)O)C)NC(C(O)=O)=C(COCC)OOSC=O	0.487887	0.493806	0.495217	0.497468	0.495222	0.498593	0.497191	0.503371	0.497753	0.497753	0.48849	0.496081	0.497485	0.497476	0.495516	0.489063	0.495803	0.492729	0.49469	0.495789	0.507865	0.488306	0.496637	0.458689	0.486564	0.501134	0.504805	0.507614	0.518789	0.507919	0.510434	0.483634	0.525499	0.527916	0.531164	0.544255	0.525676	0.527533	0.501124	0.462507	0.48169	0.534577	0.557599	0.56	0.555193	0.55296	0.558392	0.55814
322	CN([C@H1]1CC2=CC(OC)=C(OC)C(OC)=C2C=C3C=C)NC(=O)C=C13	0.45716	0.460928	0.462477	0.464024	0.463415	0.465244	0.464677	0.471376	0.465286	0.465286	0.464176	0.472527	0.472307	0.469512	0.469189	0.465728	0.465978	0.467113	0.470158	0.467643	0.473556	0.457196	0.464156	0.442006	0.454319	0.463235	0.46285	0.465088	0.483636	0.468864	0.469016	0.452483	0.475429	0.475545	0.47913	0.491516	0.483699	0.484061	0.462705	0.439774	0.451317	0.481308	0.492877	0.495444	0.489971	0.491107	0.493417	0.496859
323	C=12N(N=NC=1C(OCC3=CC=C(C=C3)F)=O)C(OC)=C(OC)C(OC)=CC4=CC=C(C(=O)C=C24)NC	0.51694	0.521834	0.523186	0.524537	0.522331	0.525627	0.524224	0.527717	0.524769	0.524769	0.521573	0.528867	0.531845	0.52861	0.52752	0.523758	0.532751	0.528899	0.529956	0.526172	0.535403	0.499454	0.523628	0.48895	0.49699	0.5125	0.515989	0.518659	0.535097	0.519805	0.525488	0.504627	0.547989	0.551927	0.554191	0.57265	0.552223	0.558115	0.533042	0.496939	0.519231	0.582613	0.612299	0.614645	0.605038	0.607085	0.605559	0.613697
324	C1=CC1(C=CN(COC(OC)=O)N=NN)[C@H1]C2CC3=CC(OC)=C(OC)C(OC)=C3C=CC=C(NC)C(=O)C=C2	0.420168	0.422408	0.423151	0.423892	0.42325	0.425177	0.424631	0.428023	0.425273	0.425273	0.422036	0.42729	0.429942	0.425096	0.425641	0.42278	0.425192	0.425368	0.423101	0.425819	0.434059	0.423406	0.425096	0.410667	0.423102	0.423773	0.426367	0.428846	0.429293	0.430779	0.430218	0.418831	0.436217	0.438314	0.440395	0.434203	0.438586	0.438272	0.431877	0.419637	0.424104	0.449168	0.454328	0.456172	0.456299	0.454819	0.455582	0.454925
325	O=C(C1=C(C(OCC)=O)N(N=N1)[C@@H1]C2=C3CC(NC)=CC=C2C4=C(C(OC)=C(OC)C=C4CC3)OC)OO	0.496166	0.499454	0.500819	0.502183	0.502458	0.503275	0.503546	0.507902	0.504092	0.504092	0.49918	0.507365	0.51036	0.504632	0.505183	0.500546	0.508734	0.504907	0.506812	0.503001	0.518053	0.491713	0.502994	0.470327	0.48674	0.506601	0.508493	0.511208	0.530344	0.513172	0.518092	0.488779	0.529317	0.532475	0.536442	0.557465	0.537716	0.541981	0.509836	0.476562	0.504978	0.576734	0.608554	0.610931	0.604676	0.606754	0.606949	0.609096
326	C=1N(N=NC=1C(=O)OCC2=CC=C(C=C2)F)CC(OC)=C(OC)C(OC)=CC3=CC=C(NC)C(=O)C=C3	0.400884	0.403145	0.403013	0.406407	0.403135	0.404135	0.40363	0.40787	0.403377	0.403377	0.401006	0.404494	0.402735	0.405	0.40375	0.4	0.413945	0.404375	0.40399	0.407407	0.420854	0.379811	0.403246	0.387411	0.378481	0.387781	0.388717	0.391224	0.40504	0.391197	0.39604	0.389798	0.410412	0.410843	0.412965	0.427632	0.409392	0.414311	0.419558	0.403289	0.417202	0.463625	0.483404	0.485232	0.486585	0.494175	0.48483	0.481325
327	O=CC1=C(C(OCC)=O)N(N=N1)[C@@H1]C2=C3C(C(NC)=CC=C2C4=C(C(OC)=C(OC)C=C4CC3)OC)=O	0.572954	0.574468	0.574041	0.576401	0.573954	0.575722	0.575044	0.577804	0.575633	0.575633	0.574216	0.575455	0.57218	0.577059	0.575882	0.574719	0.581615	0.578327	0.580341	0.578171	0.585294	0.568862	0.577987	0.550663	0.566287	0.576171	0.578854	0.578824	0.587274	0.581217	0.585495	0.555687	0.588844	0.59117	0.591662	0.595925	0.589685	0.593249	0.619191	0.594779	0.607425	0.706383	0.730102	0.730585	0.725361	0.733092	0.723519	0.731737
328	C1[C@@H1](C2=CC3(C(SC)=CC=C2C4=C(OC)C(OC)=C(C=C4C1)O)C)NC(C(O)=O)=C(C3)ONC	0.505618	0.509815	0.511211	0.513453	0.511198	0.514574	0.513151	0.519306	0.51371	0.51371	0.508693	0.515372	0.518436	0.516797	0.515677	0.51009	0.517627	0.512849	0.513107	0.512591	0.527201	0.502838	0.515101	0.475028	0.501138	0.513803	0.517416	0.520179	0.535495	0.520517	0.522129	0.499719	0.54626	0.548619	0.551819	0.56226	0.546358	0.547305	0.51368	0.472191	0.488567	0.550875	0.57189	0.574273	0.571274	0.569031	0.575298	0.573276
329	N([C@@H1]1CCC2=CC(OC)=C(OC)C=C2CC1)=CC=C(C=C)NC	0.312995	0.313139	0.313187	0.313234	0.31348	0.3148	0.314308	0.311628	0.314063	0.314063	0.312598	0.310559	0.30787	0.310023	0.309487	0.311617	0.309302	0.310264	0.310078	0.313526	0.307692	0.313662	0.307991	0.32437	0.315961	0.311269	0.309914	0.309302	0.301132	0.307932	0.308108	0.309713	0.299045	0.298322	0.298551	0.295245	0.30139	0.300872	0.302469	0.316848	0.307387	0.290598	0.280216	0.280808	0.288462	0.286891	0.285812	0.282623
330	O=C(C(Cl)Cl)NC(=O)N[C@H1]1CCC2=C(C(OC)=C(OC)C(OC)=C2)C3=CC=C(NC)C(=O)C=C13	0.783784	0.778109	0.775798	0.77613	0.774074	0.774981	0.773836	0.768892	0.773264	0.773264	0.77266	0.765957	0.762044	0.768382	0.768212	0.77037	0.769287	0.77025	0.768722	0.778354	0.765693	0.819876	0.794776	0.753247	0.821373	0.81079	0.80633	0.802395	0.781911	0.8012	0.796724	0.764179	0.76383	0.761099	0.757173	0.749656	0.757917	0.755773	0.908803	0.864821	0.827666	0.692977	0.673065	0.670491	0.680699	0.681141	0.675676	0.672634
331	O=C(C(Cl)Cl)NCC1=CN(N=N1)[C@H1]2CCC3=CC(OC)=C(OC)C(OC)=C3C4=CC=C(C(=O)C=C42)NCCO	0.617315	0.616729	0.615193	0.620711	0.61505	0.616915	0.617154	0.617957	0.61677	0.61677	0.620539	0.617483	0.621823	0.623288	0.623053	0.618988	0.623134	0.621655	0.623756	0.620561	0.623916	0.616508	0.621269	0.609929	0.612842	0.62069	0.619315	0.620112	0.627692	0.624844	0.626244	0.596764	0.632665	0.632024	0.632371	0.636472	0.629451	0.632149	0.673509	0.664663	0.664721	0.911189	0.929452	0.926962	0.955944	0.932274	0.931177	0.93146
332	O=C(C(Cl)Cl)NC(=O)N[C@H1]1CCC2=C(C(OC)=C(OC)C(OC)=C2)C3=CC=C(C(C=C31)=O)NCC(=O)OC	0.764792	0.75942	0.757225	0.758845	0.755588	0.757751	0.755396	0.751966	0.754853	0.754853	0.755427	0.749107	0.747863	0.751433	0.751254	0.753247	0.753582	0.754487	0.754298	0.761011	0.750178	0.796534	0.775599	0.73477	0.79788	0.789513	0.786657	0.782957	0.766003	0.781752	0.778825	0.745824	0.752427	0.751034	0.74726	0.74124	0.74553	0.744695	0.880861	0.837539	0.806912	0.687008	0.670862	0.669385	0.678344	0.677707	0.673418	0.671492
333	O=C(C(Cl)Cl)NC(=O)N[C@H1]1CCC2=C(C(OC)=C(OC)C(OC)=C2)C3=CC=C(NC)C(=O)C=C31	0.783784	0.778109	0.775798	0.77613	0.774074	0.774981	0.773836	0.768892	0.773264	0.773264	0.77266	0.765957	0.762044	0.768382	0.768212	0.77037	0.769287	0.77025	0.768722	0.778354	0.765693	0.819876	0.794776	0.753247	0.821373	0.81079	0.80633	0.802395	0.781911	0.8012	0.796724	0.764179	0.76383	0.761099	0.757173	0.749656	0.757917	0.755773	0.908803	0.864821	0.827666	0.692977	0.673065	0.670491	0.680699	0.681141	0.675676	0.672634
334	O=C(O)C=C(C(OCC)=O)N=NN[C@H1]1CCC2=CC(OC)=C(OC)C(OC)=C2C3=CC=C(NC)C(=O)C=C13	0.711471	0.709091	0.708304	0.708711	0.706825	0.708914	0.706741	0.703729	0.70625	0.70625	0.708887	0.704498	0.704624	0.711405	0.711204	0.708101	0.707554	0.710709	0.707064	0.70961	0.711618	0.721664	0.704294	0.726138	0.722622	0.717606	0.717787	0.715877	0.705802	0.714585	0.712205	0.6759	0.691949	0.689815	0.688816	0.688312	0.693634	0.693069	0.792576	0.827103	0.795994	0.683149	0.674608	0.674171	0.677848	0.678277	0.679293	0.671044
335	O=C(O)C1=C(C(OCC)=O)N=NN1[C@H1]2CCC3=CC(OC)=C(OC)C(OC)=C3C4=CC=C(NC)C(=O)C=C24	0.594262	0.595683	0.595224	0.598485	0.596042	0.596859	0.598022	0.597914	0.598604	0.598604	0.594516	0.595597	0.596877	0.6	0.598837	0.594059	0.599884	0.598489	0.604191	0.600233	0.606272	0.589486	0.598142	0.579199	0.585106	0.600234	0.600933	0.602676	0.615518	0.603267	0.608392	0.575247	0.616657	0.617045	0.618347	0.626899	0.614642	0.619966	0.640262	0.623768	0.640653	0.827302	0.850094	0.849221	0.857323	0.867302	0.848997	0.849563
336	O=C(C)N[C@@H1]C1=C2C(C(SC)=CC=C1C3=C(C(OC)=C(OC)C=C3CC2)OC(C(C)C)=O)C=O	0.475862	0.481056	0.482501	0.483945	0.482521	0.485944	0.483686	0.489983	0.484259	0.484259	0.473985	0.481756	0.4849	0.48146	0.480319	0.474586	0.480638	0.48089	0.482051	0.483963	0.493707	0.480444	0.485698	0.449301	0.478642	0.501458	0.508741	0.515152	0.5083	0.502317	0.50578	0.46981	0.523891	0.529847	0.536669	0.525934	0.518059	0.519977	0.491963	0.454013	0.46954	0.523783	0.545705	0.547305	0.54063	0.542636	0.545605	0.546256
337	O=C(OCC)C1=CN(N=N1)[C@H1]2CCC3=CC(OC)=C(OC)C(=C3C4=CC=C(NC)C(C=C42)=O)OCC	0.615623	0.617048	0.615527	0.619988	0.616379	0.617231	0.618462	0.617269	0.618081	0.618081	0.614815	0.612844	0.617125	0.61855	0.618316	0.6133	0.617413	0.61496	0.619018	0.621838	0.623162	0.60274	0.615573	0.607257	0.598131	0.614957	0.614628	0.615432	0.622951	0.61411	0.617503	0.591411	0.641692	0.64101	0.641317	0.635613	0.625745	0.630357	0.659534	0.654629	0.663462	0.89369	0.909396	0.907023	0.920462	0.9369	0.912281	0.906229
338	O=C(C)N[C@@H1]C1=C2C(C(SC)=CC=C1C3=C(C(OC)=C(OC)C=C3CC2)OC(C4=CC=CC=C4)=O)SC=O	0.4891	0.491639	0.493868	0.494432	0.493875	0.497213	0.494994	0.501112	0.495551	0.495551	0.492188	0.498888	0.506132	0.500279	0.49833	0.493586	0.499444	0.498886	0.503344	0.498606	0.50976	0.486166	0.498609	0.458498	0.483597	0.503941	0.509275	0.512058	0.539459	0.510674	0.516564	0.483221	0.528926	0.533003	0.537068	0.564641	0.534986	0.539351	0.503906	0.461451	0.485442	0.547201	0.570038	0.571583	0.566848	0.568009	0.570033	0.572279
339	O=C(C(C)C)OC=1C(C=C2[C@H1](CCC3=CC(OC)=C(OC)C(OC)=C3C2=CC=1N)C(C)=O)SC=O	0.489374	0.493579	0.495812	0.495541	0.495817	0.498326	0.49777	0.502227	0.498328	0.498328	0.494966	0.500836	0.506414	0.500557	0.498607	0.495531	0.504746	0.5	0.502787	0.498048	0.508361	0.490652	0.498052	0.467045	0.487238	0.505073	0.509561	0.514896	0.52514	0.508418	0.512605	0.483492	0.525853	0.529929	0.535675	0.543621	0.529379	0.532895	0.496667	0.464205	0.485714	0.550908	0.57975	0.581294	0.574003	0.570027	0.578057	0.578575
340	O=C(O)C1=CN(N=N1)[C@H1]2CCC3=C(C(OC)=C(OC)C(OC)=C3)C4=CC=C(C(=O)C=C42)NCC	0.617183	0.61761	0.61606	0.620603	0.615915	0.616781	0.618034	0.616822	0.617647	0.617647	0.617369	0.61433	0.617684	0.621165	0.620927	0.615819	0.618988	0.618512	0.620625	0.620452	0.62383	0.608142	0.617114	0.613932	0.604459	0.615481	0.614134	0.614953	0.625619	0.616635	0.618069	0.5925	0.627666	0.627047	0.627415	0.635492	0.623487	0.626208	0.666238	0.667116	0.672572	0.922805	0.937024	0.934483	0.947442	0.967422	0.940153	0.933702
341	O=C(O)C1=C(C(OCC)=O)N=NN1[C@H1]CCC2=CC(OC)=C(OC)C(OC)=C2C3=CC=C(C(C=C3)=O)NC	0.584441	0.582948	0.581411	0.583004	0.581303	0.582237	0.581472	0.580392	0.58109	0.58109	0.578496	0.577778	0.575146	0.580603	0.581365	0.576974	0.581532	0.576848	0.582187	0.586025	0.587696	0.581036	0.582677	0.584308	0.577104	0.58383	0.583663	0.583607	0.589877	0.580052	0.584807	0.559868	0.576485	0.577093	0.576706	0.589408	0.577456	0.58239	0.631081	0.637206	0.642659	0.673039	0.686174	0.685696	0.68961	0.702225	0.684516	0.683569
342	O=C(C(C)C)OCC(C=C1[C@H1](CCC2=CC(OC)=C(OC)C(O)=C2C1=CC=O)C(C)=O)C=O	0.432114	0.435993	0.436689	0.440049	0.437654	0.440395	0.438964	0.443966	0.439581	0.439581	0.434756	0.438844	0.44226	0.439385	0.438154	0.435454	0.441231	0.437001	0.439189	0.439235	0.445332	0.442685	0.437615	0.41434	0.440635	0.452665	0.453242	0.45919	0.458282	0.454829	0.455053	0.429104	0.455803	0.456014	0.462321	0.464539	0.456287	0.456768	0.44328	0.420179	0.428838	0.473401	0.491516	0.492407	0.488523	0.487934	0.489437	0.492974
343	O=C(C(C)C)OC=1C(C=C2[C@H1](CCC3=CC(OC)=C(OC)C(OC)=C3C2=CC=1S)C(C)=O)OC	0.485666	0.490736	0.491307	0.49355	0.491317	0.494672	0.493281	0.498601	0.493841	0.493841	0.489613	0.4972	0.50112	0.495243	0.494124	0.491021	0.498599	0.493013	0.494972	0.495233	0.502237	0.486056	0.494407	0.462329	0.483466	0.50312	0.508494	0.514723	0.518207	0.502252	0.503928	0.479753	0.520707	0.523967	0.530579	0.538588	0.520066	0.52193	0.495526	0.461978	0.479483	0.540749	0.570572	0.572985	0.561375	0.559128	0.565431	0.568553
344	O=C(O)C=C(OC)C(C(NC)=CC=C1C2=C(OC)C(OC)=C(OC)C=C2CC[C@@H1](C1)NCC)=O	0.446529	0.449501	0.450187	0.449969	0.451151	0.451212	0.453358	0.454771	0.45398	0.45398	0.444652	0.449598	0.450339	0.451953	0.451613	0.445342	0.448425	0.446848	0.446363	0.451833	0.466999	0.444585	0.445679	0.428023	0.443456	0.452724	0.4533	0.452912	0.463715	0.453076	0.455108	0.434539	0.464653	0.465704	0.465868	0.478546	0.463341	0.464671	0.451393	0.431234	0.44326	0.476077	0.488047	0.488074	0.490288	0.487074	0.488576	0.49211
345	O=C(O)C1=CN(N=N1)[C@H1]2CCC3=C(C(OC)=C(OC)C(OC)=C3)C4=CC=C(C(C=C42)=O)NCC	0.617183	0.61761	0.61606	0.620603	0.615915	0.616781	0.618034	0.616822	0.617647	0.617647	0.617369	0.61433	0.617684	0.621165	0.620927	0.615819	0.618988	0.618512	0.620625	0.620452	0.62383	0.608142	0.617114	0.613932	0.604459	0.615481	0.614134	0.614953	0.625619	0.616635	0.618069	0.5925	0.627666	0.627047	0.627415	0.635492	0.623487	0.626208	0.666238	0.667116	0.672572	0.922805	0.937024	0.934483	0.947442	0.967422	0.940153	0.933702
347	CCCCCCCCCCCCCCCC(OCC1=CN(N=N1)[C@H1]C2CC3=CC(OC)=C(OC)C(OC)=C3C4=CC=C(C(=O)C=C24)NC)=O	0.617268	0.618742	0.618193	0.619718	0.619078	0.618926	0.621241	0.621019	0.621881	0.621881	0.615385	0.617441	0.615726	0.616168	0.616953	0.614843	0.62014	0.613477	0.618714	0.620601	0.618897	0.613281	0.617197	0.606481	0.610568	0.614496	0.618286	0.619108	0.627922	0.621881	0.626437	0.592097	0.612923	0.615337	0.616748	0.634921	0.618696	0.623464	0.668418	0.662551	0.668224	0.707239	0.71491	0.715442	0.723942	0.734266	0.716614	0.71875
349	CCCCCCCCCCCCCCCC=1OCCC=C2[C@H1](CCC3=C(C(OC)=C(OC)C(OC)=C3)C2=CC=1)NSC=O	0.463647	0.467301	0.468806	0.469436	0.468843	0.470623	0.470937	0.474837	0.47153	0.47153	0.467857	0.473341	0.478364	0.473903	0.473591	0.46849	0.474807	0.472436	0.470171	0.470344	0.482206	0.469091	0.466942	0.447288	0.465413	0.477504	0.480574	0.483602	0.498219	0.481194	0.481283	0.454762	0.487254	0.48903	0.492512	0.50718	0.494493	0.493941	0.472469	0.452206	0.465827	0.524227	0.537365	0.539031	0.53824	0.535899	0.539874	0.537058
350	OC(=O)C1=C(C(OCC)=O)N=NN1[C@H1]CCC2=CC(OC)=C(OC)C(OC)=C2C3=CC=C(NC)C(C=C3)=O	0.584441	0.582948	0.581411	0.583004	0.581303	0.582237	0.581472	0.580392	0.58109	0.58109	0.578496	0.577778	0.575146	0.580603	0.581365	0.576974	0.581532	0.576848	0.582187	0.586025	0.587696	0.581036	0.582677	0.584308	0.577104	0.58383	0.583663	0.583607	0.589877	0.580052	0.584807	0.559868	0.576485	0.577093	0.576706	0.589408	0.577456	0.58239	0.631081	0.637206	0.642659	0.673039	0.686174	0.685696	0.68961	0.702225	0.684516	0.683569
351	C[C@H1](NCC)CC1=CCC(NC)=CC=C1C2=C(C=C(OC)C(OC)=C2OCC3=CC=CC=C3)OSC	0.452528	0.456335	0.457898	0.455882	0.458845	0.458896	0.460123	0.459707	0.460736	0.460736	0.455105	0.462623	0.463325	0.461397	0.460172	0.455774	0.461444	0.45989	0.456707	0.455936	0.469075	0.45614	0.454268	0.436237	0.454146	0.466791	0.466379	0.46683	0.493835	0.476131	0.475339	0.442462	0.468452	0.469472	0.470484	0.501487	0.473246	0.473653	0.459939	0.442186	0.452012	0.483166	0.493096	0.493969	0.493619	0.491309	0.491056	0.495392
352	C1[C@H1](OC1)O[C@@H1]([C@H1]O)COOCNC2(N=NC(=C2)C=CC3=C(C=CC4=C3)Cl)CC(OC)=C(OC)C=C4CCNC=O	0.419527	0.422419	0.423939	0.423779	0.42319	0.424956	0.425294	0.427566	0.425882	0.425882	0.421239	0.426056	0.42598	0.427396	0.42622	0.423599	0.424136	0.431858	0.423888	0.427225	0.44241	0.411449	0.431604	0.398914	0.409444	0.418632	0.421857	0.424971	0.440421	0.425882	0.429577	0.417458	0.444189	0.446101	0.448828	0.468535	0.448851	0.452668	0.435322	0.400969	0.418052	0.460263	0.48369	0.486228	0.476593	0.480204	0.483343	0.481752
353	OC(=O)C1=C(C(OCC)=O)N(N=N1)[C@H1]C2CC3=CC(OC)=C(OC)C(OC)=C3C4=CC=C(NC)C(=O)C=C42	0.590661	0.592145	0.590717	0.594089	0.591566	0.592414	0.592659	0.59257	0.592303	0.592303	0.589976	0.595911	0.589606	0.591837	0.592548	0.59047	0.597473	0.590282	0.595195	0.596862	0.598321	0.584709	0.592793	0.577902	0.580171	0.589124	0.594692	0.596512	0.60789	0.593261	0.598558	0.569111	0.595099	0.599301	0.601626	0.621732	0.607143	0.611696	0.635243	0.623161	0.639674	0.689781	0.704586	0.706127	0.709988	0.717654	0.705144	0.708234
354	C1[C@H1](OCCC)CC2=CC(C(NC)=CC=C2C3=C(C(OC)=C(OC)C=C3CC1)OC(OCC)=O)NC=O	0.471851	0.474537	0.475998	0.476603	0.476025	0.478613	0.47806	0.482699	0.478637	0.478637	0.474233	0.479539	0.484429	0.481802	0.481503	0.474841	0.480115	0.478662	0.480692	0.478336	0.48989	0.473808	0.480947	0.456109	0.469376	0.488005	0.493575	0.496503	0.504624	0.499415	0.50644	0.464887	0.507403	0.510795	0.514172	0.526821	0.524083	0.53039	0.487254	0.459202	0.475745	0.529847	0.545961	0.546719	0.545149	0.543722	0.544997	0.546518
355	C1=C(OC)C=C(OC)C=C1CC[C@H1](C=CC(C(OC(C2=CC=CC=C2)=O)=CC=CC)=O)C	0.336772	0.335772	0.337719	0.335761	0.33698	0.340146	0.335756	0.336949	0.335512	0.335512	0.336264	0.334056	0.335256	0.336476	0.335994	0.336257	0.336713	0.335751	0.337437	0.337946	0.335971	0.336834	0.333575	0.338224	0.338113	0.339956	0.341374	0.340595	0.364032	0.343316	0.342277	0.329889	0.335878	0.336784	0.336763	0.358465	0.337017	0.336307	0.333092	0.337461	0.332594	0.326819	0.326227	0.327531	0.32789	0.326371	0.324254	0.324307
356	N(C)C(=O)NCCC(OCC1=CN(N=N1)[C@H1]CCC2=CC(OC)=C(OC)C(OC)=C2C3=CC=C(C(=O)C=C3)N)C=O	0.591649	0.591133	0.592827	0.588936	0.591579	0.591451	0.590623	0.587213	0.59021	0.59021	0.587491	0.584434	0.581604	0.588563	0.589385	0.586957	0.586231	0.58676	0.586926	0.589923	0.582873	0.593817	0.589672	0.602365	0.591925	0.59322	0.591865	0.590656	0.592847	0.59021	0.593031	0.568724	0.578595	0.579228	0.577763	0.584918	0.578562	0.581673	0.619318	0.636157	0.627636	0.662517	0.668679	0.667112	0.670955	0.689726	0.669137	0.668231
357	C1[C@H1](OC1)OCOC(=S)N[C@H1]C2CC=C3C(OC)=C(OC)C(OC)C=C3C=4C2=CC(=O)C(=CC=4)NCC=C	0.464635	0.467317	0.468768	0.470218	0.468804	0.472206	0.469143	0.476272	0.468875	0.468875	0.46617	0.470622	0.473774	0.47032	0.469178	0.467622	0.472873	0.4748	0.474286	0.475316	0.48	0.46136	0.472	0.437901	0.458673	0.473745	0.480115	0.48389	0.491158	0.480714	0.485911	0.457734	0.490746	0.496637	0.500839	0.509172	0.494401	0.49972	0.49536	0.461401	0.477855	0.509497	0.530769	0.533224	0.524807	0.525938	0.525563	0.529638
358	C1[C@H1](NCC)C2C=CC(OC)=C(OC)C=C2CC[C@H1]C3=CCC(OC(OCC)=O)=CC=C31	0.286694	0.28698	0.289707	0.289796	0.291752	0.292916	0.29516	0.298234	0.295842	0.295842	0.286494	0.290257	0.287155	0.288904	0.289295	0.287466	0.287449	0.2891	0.288994	0.291837	0.293127	0.277008	0.288032	0.280314	0.276966	0.285324	0.288723	0.290061	0.298797	0.29144	0.294317	0.279341	0.296151	0.29721	0.299935	0.311097	0.301629	0.304545	0.281586	0.274021	0.284435	0.290343	0.300738	0.301227	0.298822	0.299814	0.300371	0.299754
359	C12=C(OC)C=C(OC)C=C1CC[C@H1](NC(C(O)=O)(C)C2=CC=C(NC)C)CON=COC	0.458208	0.461908	0.463429	0.464072	0.462597	0.466147	0.464713	0.46778	0.465311	0.465311	0.460708	0.466269	0.466945	0.468582	0.467385	0.461354	0.468619	0.465352	0.464839	0.472038	0.477844	0.454711	0.463327	0.437155	0.454545	0.463297	0.466427	0.472139	0.46934	0.460942	0.462864	0.453614	0.484778	0.488318	0.494454	0.49023	0.478236	0.480324	0.466269	0.439385	0.457729	0.498258	0.519681	0.520501	0.514318	0.512879	0.514269	0.521119
360	N(C)CNCC1=CN(N=N1)[C@H1]2CCC3=CC(OC)=C(OC)C(OC)=C3C4=CC=C(C(C=C24)=O)NC=O	0.622533	0.62294	0.621365	0.625949	0.621212	0.622082	0.623344	0.622097	0.622951	0.622951	0.624762	0.622642	0.626021	0.627525	0.62729	0.623179	0.627364	0.623819	0.626969	0.626818	0.626098	0.615533	0.622404	0.6173	0.611825	0.622857	0.622475	0.62225	0.627878	0.625	0.626415	0.597607	0.629902	0.630262	0.62963	0.631832	0.627666	0.630395	0.674238	0.672098	0.670836	0.93005	0.940153	0.936244	0.975732	0.952717	0.946041	0.940849
361	OC(=O)C=C(C(OCC)=O)N(NCCC)N[C@H1]1CCC2=CC(OC)=C(OC)C(OC)=C2C3=CC=C(NC)C(=O)C=C31	0.693645	0.693742	0.693023	0.692308	0.692767	0.692512	0.693837	0.689928	0.693377	0.693377	0.691284	0.688406	0.688568	0.690429	0.691342	0.690571	0.691293	0.693122	0.693069	0.692053	0.691853	0.681237	0.689314	0.700902	0.681972	0.681457	0.678501	0.676913	0.675693	0.682237	0.680183	0.662269	0.685587	0.683576	0.68265	0.681196	0.687222	0.686709	0.750683	0.767341	0.761705	0.673101	0.671291	0.670878	0.673358	0.674787	0.671714	0.66787
362	C[C@H1](NCC)CC1=CC(C(NC)=CC=C1C2=C(C=C(OC)C(OC)=C2OCC3=CC=CC=C3)OSCC)=O	0.596877	0.599717	0.598025	0.600846	0.596763	0.59775	0.599156	0.597902	0.599859	0.599859	0.599434	0.59399	0.593315	0.60493	0.604651	0.597742	0.598039	0.597475	0.596503	0.610914	0.593468	0.594536	0.589261	0.603104	0.594946	0.595053	0.595924	0.594689	0.614634	0.594254	0.592618	0.56613	0.577154	0.578842	0.57947	0.623909	0.581333	0.581287	0.658909	0.684047	0.668405	0.636054	0.625735	0.625407	0.625411	0.624753	0.621728	0.623207
363	C1[C@H1](OC1)OOC(O)(C)CN=CN([C@@H1]2C3=CC(C(SC)=CC=C3C4=C(OC)C(OC)=C(C=C4CC2)O)O)C=O	0.4849	0.489192	0.491468	0.492894	0.491477	0.494031	0.49347	0.499716	0.494037	0.494037	0.488902	0.495746	0.499716	0.497159	0.496023	0.49033	0.495465	0.496591	0.493492	0.49375	0.504259	0.486143	0.493764	0.462073	0.484375	0.499139	0.501143	0.502278	0.517026	0.50601	0.509423	0.480594	0.518726	0.519488	0.521932	0.533444	0.524022	0.526756	0.498295	0.465116	0.485404	0.535595	0.554645	0.557073	0.553905	0.552501	0.55458	0.554342
364	C12=C(OC)C=C(OC)C=C1CC[C@H1](NC(C(O)=O)(C)C2=CC=C(NC)C)COCNCOC	0.460566	0.464264	0.465786	0.466427	0.464949	0.468506	0.467066	0.470131	0.467665	0.467665	0.463942	0.470377	0.46929	0.470941	0.469742	0.464586	0.471856	0.468582	0.46806	0.474413	0.479329	0.454435	0.465672	0.440418	0.454268	0.463899	0.467026	0.471856	0.469063	0.461538	0.463458	0.45685	0.485363	0.488902	0.494166	0.49252	0.480535	0.482619	0.467742	0.440887	0.458333	0.498839	0.520251	0.521071	0.514024	0.514318	0.51484	0.520821
365	C=1C(C)(C)OC(=O)/N=C(/N[C@H1]2CCC3=C(C(OC)=C(OC)C(OC)=C3)C4=CC=C(NC)C(=O)C=C24)N=1	0.727648	0.722867	0.720899	0.723622	0.720598	0.72381	0.720488	0.719784	0.72	0.72	0.727397	0.726409	0.722973	0.726223	0.724864	0.72541	0.728261	0.723202	0.725424	0.726839	0.727519	0.725818	0.721545	0.697626	0.725559	0.722982	0.723129	0.72241	0.707947	0.717671	0.716498	0.693767	0.707682	0.706606	0.705541	0.701587	0.70265	0.702059	0.802268	0.778592	0.761268	0.703065	0.686695	0.686239	0.698383	0.695652	0.688232	0.68938
369	C=1C(C)(C)OC(=O)/N=C(/N[C@H1]2CCC3=C(C(OC)=C(OC)C(OC)=C3)C4=CC=C(C(C=C42)=O)NC)N=1	0.727648	0.722867	0.720899	0.723622	0.720598	0.72381	0.720488	0.719784	0.72	0.72	0.727397	0.726409	0.722973	0.726223	0.724864	0.72541	0.728261	0.723202	0.725424	0.726839	0.727519	0.725818	0.721545	0.697626	0.725559	0.722982	0.723129	0.72241	0.707947	0.717671	0.716498	0.693767	0.707682	0.706606	0.705541	0.701587	0.70265	0.702059	0.802268	0.778592	0.761268	0.703065	0.686695	0.686239	0.698383	0.695652	0.688232	0.68938
370	N1=NN1[C@@H1]2C3=CC(C(NC)=CC=C3C4=C(C(OC)=C(OC)C=C4CC2)OC)=O	0.74247	0.738416	0.736215	0.7379	0.734572	0.735513	0.734421	0.731024	0.733877	0.733877	0.742129	0.735751	0.731959	0.738131	0.739227	0.73991	0.737778	0.73997	0.738519	0.736256	0.733088	0.752688	0.729151	0.779283	0.753858	0.73988	0.736059	0.732644	0.715418	0.733877	0.729948	0.698893	0.701754	0.697075	0.693638	0.687288	0.69993	0.698126	0.839216	0.910806	0.863269	0.700413	0.678501	0.675835	0.685296	0.684631	0.678996	0.679158
371	CNCC1C=CC=C(C=C1)NC(=O)N[C@@H1]2C3=CC(C(NC)=CC=C3C4=C(OC)C(OC)=C(C=C4CC2)OC)=O	0.739561	0.734551	0.732493	0.73651	0.730957	0.734266	0.73324	0.73125	0.732729	0.732729	0.733146	0.729673	0.726141	0.730689	0.730501	0.732306	0.732777	0.731198	0.733473	0.737395	0.72721	0.774689	0.751408	0.710072	0.777206	0.770833	0.768188	0.768466	0.747405	0.766003	0.764498	0.722535	0.734639	0.733378	0.733289	0.724228	0.729223	0.72964	0.854694	0.810687	0.791362	0.681467	0.674115	0.671614	0.676268	0.678795	0.67352	0.671623
372	CNC=CC=C1C[C@H1](CCC2=CC(OC)=C(OC)C(=C21)OC)N3C(C(O)=O)=C(N=N3)C(=O)OOSC	0.471884	0.474566	0.475173	0.477483	0.476053	0.478637	0.477233	0.482719	0.47781	0.47781	0.47086	0.477011	0.479334	0.47756	0.478111	0.47147	0.477586	0.475287	0.475617	0.478361	0.493349	0.464369	0.475862	0.448438	0.460819	0.480233	0.481481	0.484411	0.501152	0.48037	0.483871	0.468332	0.498021	0.500564	0.504783	0.521641	0.501693	0.505352	0.484691	0.455786	0.480094	0.545611	0.573938	0.576444	0.573303	0.577231	0.573948	0.57629
373	CNC=1CC=C2[C@H1](CCC3=C(C(OC)=C(OC)C(=C3)OC)C2=CC=1)NC(C(=O)O)=CC=CNC=O	0.467771	0.471386	0.472009	0.474367	0.472042	0.474676	0.473251	0.47798	0.473839	0.473839	0.471074	0.479976	0.482353	0.478799	0.478491	0.471698	0.476218	0.47734	0.473345	0.472663	0.486168	0.469706	0.474457	0.447257	0.466947	0.479786	0.480189	0.481438	0.493263	0.48519	0.486136	0.465006	0.499711	0.501441	0.504023	0.510832	0.50173	0.50201	0.479976	0.450363	0.463863	0.509445	0.526936	0.529445	0.527715	0.525424	0.528483	0.529213
374	CNC=1CC2=C3[C@H1](CCC4=C(C(OC)=C(OC)C(=C4)OC)C3=C5C=1)NC(C(=O)O)=C5ON2	0.5264	0.530351	0.531666	0.534611	0.533262	0.534859	0.535923	0.541778	0.536456	0.536456	0.533369	0.542111	0.544196	0.541045	0.5408	0.535505	0.541001	0.540512	0.539894	0.535391	0.546035	0.51824	0.536948	0.491953	0.513412	0.534225	0.53842	0.541001	0.559638	0.542201	0.546133	0.51919	0.568038	0.57188	0.57571	0.590551	0.570526	0.573831	0.542111	0.493276	0.519723	0.587895	0.613424	0.616545	0.613934	0.610879	0.613577	0.615625
375	N=NN([C@H1]1CCC2=C(C(OC)=C(OC)C(OC)=C2)C3=CC=C(C(=O)C=C13)NC)COOCCOC=O	0.753219	0.750533	0.748405	0.75	0.746818	0.748939	0.746648	0.744561	0.746121	0.746121	0.75535	0.754064	0.749122	0.75389	0.754958	0.753201	0.752294	0.750706	0.750529	0.752125	0.747722	0.75417	0.746479	0.723636	0.75528	0.743262	0.73962	0.736364	0.735355	0.742435	0.743518	0.717606	0.727579	0.722892	0.719415	0.724161	0.73033	0.733065	0.835799	0.815042	0.791483	0.68564	0.676012	0.674534	0.68242	0.68179	0.67752	0.673507
376	CNCC1C=C2[C@H1](CCC3=C(C(OC)=C(OC)C(=C3)OC)C2=CC=C1)NCOC(C4=CC=NC=C4)=O	0.456057	0.458851	0.459491	0.462722	0.459539	0.462175	0.462493	0.466392	0.463083	0.463083	0.458531	0.469231	0.46816	0.468047	0.466864	0.459172	0.464623	0.462264	0.460905	0.462766	0.476331	0.456954	0.459412	0.433495	0.455039	0.46806	0.4694	0.471564	0.487891	0.472652	0.4754	0.448931	0.476382	0.478186	0.480824	0.501433	0.483573	0.485632	0.46317	0.43568	0.452976	0.497415	0.512648	0.515169	0.514172	0.511036	0.514124	0.514061
377	O=CC=CC=CC(NCC1=CN(N=N1)[C@H1]2CCC3=CC(OC)=C(OC)C(OC)=C3C4=CC=C(C(C=C24)=O)NC)=O	0.627848	0.628229	0.62665	0.632242	0.626491	0.629397	0.628607	0.628357	0.628213	0.628213	0.630051	0.626875	0.63227	0.633794	0.633564	0.628463	0.633626	0.630094	0.632206	0.632075	0.634375	0.62508	0.632768	0.619636	0.621397	0.630215	0.628769	0.629537	0.636082	0.634361	0.636763	0.60804	0.639976	0.639294	0.639612	0.642686	0.636695	0.640388	0.682612	0.671822	0.672763	0.915028	0.930632	0.926813	0.959972	0.936155	0.933702	0.931319
378	O=CC=CC=CC(NCC1=CN(N=N1)[C@H1]2CCC3=CC(OC)=C(OC)C(OC)=C3C4=CC=C(NC)C(=O)C=C24)O	0.627525	0.628931	0.628374	0.632935	0.628213	0.631117	0.630326	0.630069	0.629931	0.629931	0.63075	0.627573	0.633979	0.633459	0.633229	0.629164	0.633292	0.629769	0.632896	0.632768	0.633022	0.616508	0.627341	0.620376	0.612842	0.621706	0.621335	0.622126	0.630703	0.626875	0.629283	0.602748	0.635645	0.635978	0.636309	0.640382	0.633394	0.637077	0.673509	0.669123	0.669051	0.911189	0.92418	0.921715	0.955944	0.936288	0.932507	0.924863
379	CNC=1CC=C2[C@H1](CCC3=C(C(OC)=C(OC)C(OC)=C3)C2=CC=1)NC(C(=O)O)=CC=CNC=O	0.467771	0.471386	0.472009	0.474367	0.472042	0.474676	0.473251	0.47798	0.473839	0.473839	0.471074	0.479976	0.482353	0.478799	0.478491	0.471698	0.476218	0.47734	0.473345	0.472663	0.486168	0.469706	0.474457	0.447257	0.466947	0.479786	0.480189	0.481438	0.493263	0.48519	0.486136	0.465006	0.499711	0.501441	0.504023	0.510832	0.50173	0.50201	0.479976	0.450363	0.463863	0.509445	0.526936	0.529445	0.527715	0.525424	0.528483	0.529213
380	N=NN([C@H1]1CCC2=C(C(OC)=C(OC)C(OC)=C2)C3=CC=C(C(=O)C=C13)NC)COCC=COCOCC	0.75196	0.749292	0.747175	0.748765	0.745595	0.74771	0.745429	0.743357	0.744905	0.744905	0.750355	0.745442	0.744235	0.747716	0.748768	0.748232	0.748596	0.745787	0.74562	0.749647	0.746508	0.755427	0.747716	0.721217	0.756541	0.75071	0.747005	0.743697	0.735395	0.744905	0.745976	0.718904	0.731132	0.726421	0.722924	0.725361	0.733871	0.735432	0.8369	0.810687	0.787436	0.689076	0.680374	0.678882	0.68683	0.6862	0.680851	0.677861
381	C12=C3C(C=4C([C@@H1](NCC5=CC=C(C)C=C5CCC1)C2)=CC(=O)C(=CC=4)SC=C)(OC)C(=C3OC)OC	0.526776	0.532496	0.533843	0.535188	0.53548	0.537118	0.53821	0.54253	0.537916	0.537916	0.534756	0.541189	0.542484	0.543466	0.543217	0.536946	0.541735	0.542077	0.540599	0.536825	0.538503	0.501903	0.535073	0.492299	0.497824	0.516513	0.522445	0.525918	0.538999	0.525433	0.529444	0.51773	0.558476	0.564075	0.567987	0.582265	0.5669	0.570279	0.524555	0.47736	0.507584	0.560317	0.587958	0.590267	0.582458	0.581102	0.581371	0.58682
382	C1=C2C(C3=C(CC[C@@H1]2N4N=NC(=C4)C5(O)CCCCC5)C=C(C(OC)=C3OC)OC=C)C=C(C1=O)O	0.483657	0.48948	0.490869	0.493082	0.492529	0.493363	0.494469	0.498895	0.495022	0.495022	0.491676	0.497512	0.503044	0.498063	0.498615	0.492239	0.498894	0.495854	0.498618	0.49309	0.4967	0.479039	0.493105	0.457351	0.475658	0.490838	0.495291	0.499723	0.507414	0.502501	0.507496	0.486065	0.519063	0.523939	0.528804	0.540877	0.525886	0.530212	0.48928	0.452915	0.481667	0.546397	0.587051	0.590316	0.573601	0.575626	0.574215	0.581572
383	C1=C2C(C=C(CC[C@@H1]2N3C=C(N=N3)COCC4=CC=CC=C4)C=C(C(=COC)OC)OC)=CC=C(NC)C1=O	0.45053	0.455026	0.456522	0.45716	0.457428	0.457478	0.457796	0.459965	0.458382	0.458382	0.458997	0.464474	0.465144	0.465882	0.465568	0.458775	0.466784	0.464433	0.462214	0.459777	0.468933	0.437611	0.455607	0.426347	0.433985	0.44868	0.450088	0.450581	0.471786	0.45412	0.457726	0.446871	0.474227	0.476027	0.477816	0.494886	0.475457	0.480046	0.477488	0.450275	0.467385	0.579011	0.605466	0.606168	0.610811	0.617008	0.608488	0.604154
384	C1=C2C(C3=CC=C(C(=O)C=C3[C@H1](CC2)N4C=C(N=N4)COC(=O)C5=CC=NC=C5)COC)C(OC)=C1OCNC=O	0.488141	0.493936	0.494493	0.496696	0.495322	0.496973	0.49725	0.500824	0.496976	0.496976	0.48873	0.500275	0.498357	0.496707	0.495609	0.49011	0.496711	0.495337	0.49235	0.498348	0.505217	0.480289	0.497529	0.453082	0.477753	0.492826	0.494777	0.499176	0.520902	0.498624	0.503573	0.481522	0.523319	0.52569	0.530524	0.546681	0.528455	0.533586	0.503581	0.455153	0.485351	0.571901	0.609315	0.61172	0.603628	0.606612	0.601533	0.606342
385	C12=C3C(CC([C@@H1](NCC4=CC=C(C)C=C4CCC1)C2)=CC(=O)C(=CC)SC=C)(OC)C(=C3OC)OC	0.453295	0.456832	0.458286	0.458904	0.46	0.460879	0.462857	0.464123	0.463429	0.463429	0.454857	0.461013	0.46084	0.459875	0.458736	0.457143	0.45992	0.462635	0.46132	0.463122	0.467843	0.441566	0.462372	0.42154	0.4397	0.455638	0.460308	0.463248	0.470621	0.460924	0.464428	0.448909	0.487079	0.491307	0.495521	0.50473	0.488242	0.491061	0.456867	0.415367	0.433031	0.490033	0.508152	0.510592	0.503001	0.501636	0.504627	0.508696
387	C1=C2C(CC([C@@H1]1NCCCCCCCCCCCCCCCC)C(=CC2)SC=COC)C(OC)=COC	0.340065	0.341764	0.344358	0.346079	0.346304	0.348249	0.349546	0.354045	0.350195	0.350195	0.336134	0.34018	0.34381	0.338896	0.338471	0.337855	0.337388	0.340836	0.344051	0.346278	0.349614	0.32874	0.344072	0.326174	0.329815	0.333333	0.336334	0.339962	0.345155	0.340631	0.344031	0.333986	0.359248	0.360799	0.364032	0.367548	0.361875	0.365337	0.33932	0.322819	0.332031	0.354562	0.365854	0.366172	0.36043	0.365546	0.369904	0.366449
388	CN(N([C@@H1]1C2=CC(=O)C(NC)=CC=C2C3=CC(=C(OC)C=C3CC1)OC)O)CNC(=S)CCCCC	0.629681	0.627843	0.629477	0.627747	0.631543	0.628003	0.634986	0.631327	0.634549	0.634549	0.630961	0.626366	0.626703	0.630569	0.630316	0.629221	0.63039	0.631001	0.632192	0.626456	0.632333	0.634697	0.625	0.645395	0.634112	0.630014	0.627316	0.627049	0.618888	0.631181	0.630464	0.631542	0.621212	0.618455	0.618893	0.615138	0.619921	0.620757	0.70193	0.732211	0.714809	0.616129	0.606079	0.604824	0.610658	0.609023	0.607232	0.6067
389	C=C1C(C=C(CC[C@@H1]1N2N=NC(=C2)C3=CC=C(Cl)C=C3)C=C(C(OC)=COC)OC)=CC=C(C=O)NC	0.374229	0.376536	0.378146	0.37722	0.379141	0.378445	0.379669	0.382173	0.380282	0.380282	0.380395	0.383109	0.38485	0.385276	0.384899	0.380308	0.382875	0.389778	0.384333	0.380748	0.384522	0.367995	0.380196	0.359494	0.3675	0.375154	0.377832	0.377818	0.392359	0.385372	0.38763	0.369364	0.392857	0.395018	0.39469	0.407516	0.397741	0.399289	0.379731	0.358909	0.376785	0.421586	0.43405	0.435035	0.430742	0.43267	0.434326	0.430475
391	CC(C)C(=O)OCC1=CN(N=N1)[C@H1]2CCC3=CC(OC)=C(OC)C(OC)=C3C4=CC=C(NC)C(=O)C=C24	0.626186	0.628625	0.627044	0.63264	0.626884	0.629793	0.629002	0.630788	0.628607	0.628607	0.626339	0.623206	0.626559	0.629073	0.62884	0.624764	0.628911	0.626408	0.630557	0.631447	0.63171	0.61926	0.626016	0.618986	0.61455	0.625473	0.62406	0.626875	0.634449	0.630653	0.634085	0.601377	0.634369	0.633717	0.636034	0.639138	0.633111	0.637795	0.675467	0.67115	0.669928	0.915671	0.927298	0.923497	0.938846	0.959944	0.930345	0.924025
392	CC(C)C=1OCCC=C2[C@H1](CCC3=C(C(OC)=C(OC)C(OC)=C3)C2=CC=1)NSC=O	0.461768	0.465435	0.466945	0.468452	0.466984	0.469643	0.468212	0.473872	0.468806	0.468806	0.466866	0.472371	0.477408	0.472933	0.472619	0.467501	0.473841	0.471463	0.468324	0.46849	0.479501	0.468085	0.465089	0.447095	0.464394	0.476534	0.479616	0.484431	0.496429	0.48024	0.480334	0.453731	0.485482	0.487269	0.492486	0.504603	0.49187	0.491329	0.470623	0.45203	0.465704	0.520748	0.533981	0.535653	0.535714	0.533372	0.537356	0.535429
393	CC(C)(O)C1N=NN(CN1CC[C@H1]2CC)C3=CC(OC)=C(OC)C(OC)=C3C4=CC=C(C(C=C24)=O)NC	0.587387	0.590773	0.59317	0.593656	0.594967	0.594853	0.59605	0.598806	0.595694	0.595694	0.582936	0.588829	0.590154	0.587641	0.587396	0.584377	0.586595	0.588935	0.588131	0.592593	0.59881	0.579552	0.593321	0.566015	0.577926	0.589682	0.594255	0.597015	0.59882	0.592836	0.597139	0.570746	0.607706	0.613769	0.616056	0.615517	0.606624	0.610209	0.626521	0.597127	0.614724	0.626744	0.640296	0.643711	0.6373	0.639542	0.635897	0.642735
394	N(C(C1=CC=NC=C12)=O)[C@@H1]3CC(C4=C(C(OC)=C(OC)C=C4CC3)OC(OC)=O)=CC=C(SC)C2=O	0.497987	0.503159	0.505457	0.505161	0.50545	0.508037	0.50659	0.510297	0.507163	0.507163	0.503738	0.516686	0.511149	0.510321	0.51004	0.505172	0.510309	0.510614	0.510882	0.508611	0.51922	0.501167	0.506865	0.475161	0.497664	0.515961	0.519676	0.522517	0.535632	0.528181	0.531594	0.492804	0.539683	0.54386	0.547149	0.552632	0.552961	0.555682	0.507147	0.472238	0.491662	0.538462	0.563496	0.565074	0.558499	0.557947	0.556593	0.564906
395	N(C(C1=CC=NC=C1)=O)[C@@H1]2C=3C(C4=C(C(OC)=C(OC)C=C4CC2)OC)=CC=C(SC)C(=O)C=3	0.893735	0.892744	0.892913	0.888627	0.890809	0.888715	0.887324	0.882673	0.88663	0.88663	0.930757	0.950806	0.913249	0.918254	0.919714	0.927769	0.916073	0.9251	0.915348	0.889498	0.868563	0.810915	0.90315	0.860484	0.815159	0.802107	0.796421	0.791266	0.786754	0.791388	0.785714	0.870866	0.859375	0.857249	0.851064	0.838849	0.853767	0.846886	0.783923	0.73474	0.717486	0.625959	0.618608	0.617322	0.627341	0.626717	0.616811	0.618227
396	C12=C(C(=C(OC)C(OC)=C1)O)CC3=CC=C(NC)CC=C3[C@H1](CC2)NC(C)=O	0.425736	0.429757	0.431398	0.429389	0.431485	0.431572	0.433758	0.431646	0.434395	0.434395	0.430307	0.431833	0.438095	0.435115	0.432931	0.430121	0.432467	0.434478	0.431286	0.430388	0.432177	0.4309	0.434202	0.412772	0.430628	0.438506	0.435504	0.436109	0.44186	0.442665	0.442957	0.422608	0.445887	0.443489	0.445532	0.448881	0.450896	0.451415	0.437301	0.413201	0.422336	0.436671	0.447183	0.448155	0.448194	0.446746	0.444968	0.44777
397	N1(CCCC1)CN[C@H1]2CCC3=C(C(OC)=C(OC)C(OC)=C3)C4=CC=C(SC)C(=O)C=C24	0.929752	0.920622	0.922322	0.914634	0.920065	0.917819	0.916328	0.908213	0.915584	0.915584	0.914286	0.903459	0.89992	0.90185	0.903304	0.91131	0.901205	0.905645	0.898957	0.912409	0.899361	0.814815	0.911075	0.898905	0.820635	0.807099	0.798473	0.793182	0.775314	0.793313	0.787491	0.87793	0.875767	0.867781	0.85994	0.840441	0.861364	0.854245	0.78566	0.762539	0.736921	0.626388	0.61785	0.617555	0.624682	0.621982	0.614997	0.617462
398	C1[C@H1](NC(O)=O)C2=CCC=CC=C2C3=C(OC)C(OC)=C(OC)C=C3CC=C1SC=O	0.455457	0.459094	0.45973	0.461222	0.459777	0.461538	0.461854	0.464871	0.462441	0.462441	0.455347	0.461673	0.465769	0.46393	0.462757	0.455986	0.461404	0.459918	0.457726	0.461268	0.475603	0.451998	0.46393	0.436484	0.45009	0.46304	0.463529	0.463972	0.48014	0.468474	0.472941	0.451804	0.484168	0.484241	0.486008	0.502281	0.488787	0.491681	0.466823	0.440411	0.454976	0.506897	0.527088	0.529611	0.527004	0.524702	0.525184	0.526791
399	N1(CCCC1)C(=O)OC2=C(OC)C(OC3)=CC=C2C4=CC=C(SC)C(C=C4[C@@H1](NC(=O)C)CC3)=O	0.770601	0.77031	0.773264	0.768382	0.771555	0.772459	0.768722	0.766423	0.768158	0.768158	0.7469	0.739381	0.743165	0.74296	0.742775	0.744727	0.741354	0.744758	0.737069	0.769287	0.75942	0.705072	0.788148	0.720687	0.708455	0.714695	0.711238	0.711756	0.68291	0.699577	0.699649	0.761693	0.811321	0.809524	0.807747	0.761905	0.786885	0.78455	0.691877	0.623588	0.617166	0.57666	0.58263	0.584337	0.583942	0.583333	0.575995	0.583233
400	C=CC(=O)OCCC=C1[C@H1](CCC2=C(C(OC)=C(OC)C(OC)=C2)C1=CC)N=O	0.427861	0.430874	0.431579	0.433168	0.431664	0.433519	0.432983	0.436229	0.433601	0.433601	0.432298	0.437307	0.440741	0.438738	0.4375	0.433002	0.438813	0.434568	0.434997	0.433251	0.443827	0.435637	0.428133	0.412628	0.433566	0.442982	0.442715	0.444169	0.454154	0.444306	0.445477	0.418634	0.444778	0.445042	0.447886	0.457126	0.447904	0.449284	0.439085	0.423969	0.430808	0.474729	0.485062	0.486834	0.489929	0.487574	0.489086	0.488263
401	N(C(C1=CC=NC=C1)=O)[C@@H1]2C=3C(C4=C(C(OC)=C(OC)C=C4CC2)OC=C)C=C(SC)C(=O)C=3	0.480329	0.486502	0.487977	0.490323	0.488863	0.491496	0.49092	0.496487	0.491506	0.491506	0.483587	0.496774	0.492999	0.491228	0.490058	0.484192	0.48863	0.487165	0.490082	0.48859	0.491565	0.478029	0.488616	0.454112	0.475312	0.487934	0.490035	0.49211	0.50029	0.495887	0.501174	0.480236	0.504	0.507412	0.509949	0.521788	0.511149	0.515705	0.481998	0.445962	0.467836	0.507606	0.529086	0.53241	0.526462	0.525905	0.523836	0.528793
402	C12=CC(OC)=C(OC)CCC([C@H1](CCCC=C1OC)NC(C)=O)(OC(=O)OC)C2=O	0.397146	0.398461	0.400829	0.401538	0.402605	0.40355	0.404734	0.409574	0.405325	0.405325	0.402258	0.40472	0.410514	0.405198	0.404017	0.4038	0.40697	0.407934	0.407561	0.403312	0.408476	0.378941	0.402712	0.38101	0.377685	0.39056	0.394706	0.398708	0.406868	0.394598	0.39836	0.390839	0.417627	0.420448	0.423253	0.434758	0.424784	0.427832	0.396481	0.372121	0.393921	0.43553	0.453678	0.456229	0.450593	0.450847	0.451577	0.453423
403	C1[C@H1](NC(O)=O)C=CCC(SC)=CCC=C(C2=C(OC)C(OC)=C(OC)C=C2CC1)SC=O	0.441921	0.445019	0.446671	0.446452	0.44674	0.447742	0.449032	0.450514	0.449677	0.449677	0.44093	0.444231	0.449647	0.444801	0.444444	0.441651	0.446727	0.444159	0.442738	0.446521	0.457529	0.438896	0.442949	0.429239	0.437706	0.441785	0.439666	0.440256	0.449652	0.446877	0.449006	0.434134	0.449969	0.448425	0.449569	0.454656	0.453193	0.456401	0.448875	0.436449	0.443211	0.459177	0.468377	0.469327	0.469597	0.470766	0.466188	0.471608
404	C12=C(C(OC)=C(OC)CCC([C@@H1]2CCC(C)C1N=C)=O)OSC	0.345409	0.345342	0.346154	0.348635	0.348015	0.349876	0.351117	0.354579	0.351737	0.351737	0.347447	0.350433	0.352252	0.35254	0.351301	0.349098	0.35356	0.351084	0.351669	0.352174	0.351169	0.339646	0.350031	0.332262	0.338189	0.348939	0.351771	0.355239	0.365929	0.356787	0.359181	0.337914	0.363636	0.365927	0.369838	0.37886	0.366146	0.369461	0.353779	0.333333	0.346952	0.383463	0.39778	0.39965	0.396704	0.395294	0.397067	0.398364
405	C=CC(OC)=C(OC)CC1=CC=C(NC)CC=C1[C@@H1](NC(N(CCO)CCO)=S)CCCNC=O	0.314379	0.315345	0.317089	0.315415	0.319038	0.317563	0.322287	0.32	0.322937	0.322937	0.31319	0.31827	0.319382	0.31528	0.313991	0.31323	0.315518	0.315484	0.31701	0.320779	0.322601	0.301974	0.316979	0.299663	0.302049	0.306149	0.307593	0.309615	0.321883	0.316947	0.319588	0.303129	0.330408	0.330424	0.332919	0.343403	0.338143	0.341677	0.306462	0.28935	0.298701	0.324771	0.337693	0.338872	0.333732	0.331541	0.333532	0.335905
406	CNC=1C(=O)C=C2[C@H1](CCC3=CC(OC)=C(OC)C(OC)=C3C2=CC=1)NC4(C(=O)O)C=CN=N4	0.738128	0.735671	0.734859	0.73405	0.733378	0.735393	0.73557	0.731333	0.736242	0.736242	0.716956	0.714947	0.71278	0.720452	0.720266	0.717333	0.717881	0.717507	0.717406	0.733736	0.738985	0.735254	0.736595	0.684318	0.733838	0.733468	0.732394	0.733957	0.723934	0.733914	0.732667	0.709115	0.724516	0.722258	0.722222	0.730038	0.728268	0.728672	0.809491	0.751061	0.74726	0.68653	0.686334	0.684874	0.685455	0.68587	0.68275	0.682883
407	CNC=1C(=O)C=C2[C@H1](CCC3=CC(OC)=C(OC)C(OC)=C3C2=CC=1N)C4(C(=O)O)C=CN=N4	0.626082	0.626462	0.626921	0.629379	0.626765	0.629607	0.626838	0.63458	0.626454	0.626454	0.619252	0.622182	0.619539	0.622941	0.622711	0.618727	0.62378	0.622331	0.622412	0.631223	0.633476	0.613284	0.625917	0.61597	0.612702	0.621389	0.624005	0.629743	0.62042	0.62248	0.623859	0.601835	0.637015	0.64124	0.646429	0.642606	0.635769	0.638411	0.66375	0.655823	0.671985	0.652432	0.65896	0.660508	0.66472	0.663164	0.663176	0.66242
408	N1=CC=CC2=C1C(OC=CC(OC=3)=CCCC[C@H1](NC(C)=O)C4=CCC(SC)=CC=C4C=32)C	0.480638	0.484935	0.487209	0.487791	0.488914	0.489773	0.490909	0.494611	0.491477	0.491477	0.486333	0.494037	0.494618	0.49375	0.493462	0.486917	0.492063	0.490641	0.494325	0.488649	0.495756	0.475014	0.491208	0.453549	0.469845	0.483779	0.489205	0.493757	0.509338	0.495726	0.499147	0.474644	0.51368	0.516147	0.521135	0.536924	0.52152	0.525112	0.489807	0.449827	0.476055	0.522099	0.547983	0.549564	0.540437	0.540733	0.539467	0.549373
409	N=1N(C=C(CNC(C(C)C)=O)N=1)[C@H1]CCC2=C3C(OC)=C(OC)C(OC)=C2C=CC=C(CC=CC=C3)CC	0.409868	0.414042	0.41481	0.416503	0.414921	0.416885	0.415415	0.418893	0.416068	0.416068	0.409031	0.412606	0.417154	0.411306	0.411841	0.409804	0.412338	0.40974	0.41024	0.416612	0.425033	0.414879	0.414062	0.397966	0.413584	0.420079	0.419016	0.422498	0.429495	0.425378	0.425768	0.40846	0.415829	0.41625	0.4202	0.426543	0.420063	0.420724	0.420915	0.405055	0.412856	0.474022	0.48875	0.48785	0.503501	0.497146	0.493073	0.490306
410	NN(C=C(CNC(C1CCCCl)=O)N=N)[C@H1]CCC2=CC(OC)=C(OC)C(OC)=C2C3=CC=C(C(=O)C=C13)NC	0.646581	0.649123	0.651822	0.651178	0.653846	0.652525	0.653872	0.65793	0.653432	0.653432	0.635633	0.636545	0.63144	0.636303	0.634973	0.633935	0.633952	0.635638	0.634615	0.658784	0.651101	0.64722	0.649464	0.642907	0.646694	0.649087	0.652965	0.653691	0.648417	0.647887	0.648198	0.623072	0.643827	0.645203	0.646568	0.64557	0.642444	0.643177	0.70923	0.706182	0.701335	0.666881	0.659006	0.661701	0.659987	0.661442	0.658354	0.660659
413	C=C1[C@H1](CCC2=C(C(OC)=C(OC)C(OC)=C2)C1=CC=CC(C)=O)NCNC(C)=O	0.425452	0.427595	0.428305	0.429901	0.428394	0.430254	0.429721	0.432099	0.430341	0.430341	0.430798	0.435834	0.441067	0.437267	0.436025	0.431507	0.435564	0.433974	0.433519	0.429988	0.440594	0.436862	0.431045	0.411012	0.435701	0.444234	0.445768	0.445415	0.453646	0.446462	0.446729	0.421513	0.44686	0.447986	0.449102	0.461859	0.45	0.44964	0.436725	0.415058	0.425705	0.463707	0.476887	0.476941	0.479031	0.476696	0.479105	0.479203
414	N=1N(C=C(CNC(C(C)C)=O)N=1)[C@H1]CCC2=CC(OC)=C(OC)C(OC)=C2C=CC3=CCC=CC=C3NC=O	0.42686	0.431718	0.432432	0.434045	0.431619	0.434401	0.433856	0.43625	0.434483	0.434483	0.423294	0.430175	0.43097	0.425373	0.425903	0.424015	0.428127	0.423866	0.425202	0.434128	0.443957	0.432884	0.433396	0.412298	0.431701	0.437619	0.436478	0.439774	0.451713	0.443533	0.443817	0.428299	0.440534	0.440821	0.445449	0.453078	0.443705	0.444244	0.443675	0.423806	0.436224	0.497214	0.517283	0.516324	0.526445	0.51929	0.519829	0.51789
415	C=C1[C@H1](CCC2=CC(OC)=C(OC)C(OC)=C2C1=CC=C(C(=O)C)NC)NC(C(=O)O)=CN=CNC	0.461031	0.462963	0.464478	0.46599	0.46452	0.467184	0.465753	0.469679	0.466349	0.466349	0.464393	0.470799	0.474092	0.47136	0.471045	0.465033	0.469643	0.469011	0.466746	0.466905	0.478831	0.468254	0.466112	0.440098	0.465443	0.474955	0.478052	0.477558	0.491364	0.48224	0.482325	0.452966	0.486581	0.490105	0.491014	0.50491	0.489523	0.488992	0.470799	0.442331	0.453565	0.506977	0.520455	0.520408	0.52381	0.52149	0.5246	0.522753
416	CC(C)(C)OC(=O)NCCC(NCC=1N=NN(C=1)[C@H1]C2CC3=CC(OC)=C(OC)C(OC)=C3C4=CC=C(C(=O)C=C24)N)C=O	0.614644	0.61509	0.616613	0.617103	0.616465	0.617347	0.616561	0.61636	0.616168	0.616168	0.614843	0.615873	0.616213	0.614603	0.616412	0.614304	0.619593	0.61602	0.616117	0.616953	0.613249	0.610642	0.617684	0.605941	0.610026	0.610863	0.61465	0.615482	0.627364	0.61514	0.618655	0.592616	0.613399	0.615809	0.618204	0.634369	0.618171	0.621936	0.653671	0.643873	0.655423	0.702168	0.711001	0.711538	0.731939	0.71608	0.714822	0.716958
417	C1C(C)(C)OC/N=C(/N[C@H1]2CCC3=CC(OC)=C(OC)C(=C3C4=CC=C(NC)C(C=C42)=O)OC)N=N1	0.742777	0.740196	0.738128	0.742138	0.736585	0.742318	0.736439	0.739251	0.735928	0.735928	0.741234	0.738889	0.736515	0.74234	0.74216	0.739161	0.737171	0.736806	0.737864	0.7418	0.741176	0.751076	0.7375	0.713467	0.74964	0.751412	0.748948	0.745645	0.734973	0.740767	0.739432	0.709028	0.721519	0.719205	0.715789	0.717165	0.715135	0.714474	0.826404	0.801509	0.789244	0.688946	0.67718	0.674677	0.681449	0.679775	0.67452	0.676761
418	CC(C)(C)OCNCCC(=O)NCC1=CN(N=N1)[C@H1]2CCC3=CC(OC)=C(OC)C(OC)=C3C4=CC=C(C(C=C24)=O)NC=O	0.6175	0.618929	0.617391	0.6229	0.617246	0.620112	0.619343	0.619136	0.618959	0.618959	0.619701	0.617665	0.620988	0.623449	0.622208	0.618159	0.623296	0.619814	0.621906	0.621739	0.625077	0.613636	0.621437	0.609114	0.609987	0.61884	0.618486	0.619283	0.626838	0.62399	0.627402	0.597024	0.629831	0.630186	0.630539	0.633669	0.625675	0.629341	0.670281	0.660252	0.661509	0.904861	0.919212	0.915483	0.949306	0.927198	0.920873	0.921196
420	C1C(C)(C)OC/N=C(/N[C@H1]2CCC3=CC(OC)=C(OC)C(=C3C4=CC=C(NC)C(C=C42)=O)OC)N1C	0.738429	0.735889	0.733843	0.73904	0.733518	0.736806	0.73338	0.733793	0.732872	0.732872	0.733287	0.733425	0.726337	0.730849	0.730663	0.73125	0.732919	0.728966	0.73122	0.733888	0.735719	0.74412	0.733241	0.711635	0.74392	0.748242	0.74581	0.744962	0.72962	0.737682	0.73877	0.704907	0.730127	0.727756	0.726552	0.716602	0.716832	0.718421	0.82016	0.797896	0.772989	0.68738	0.672615	0.671166	0.677861	0.676196	0.670988	0.671174
421	CC(C)(C)OC(=O)NCCC(OCC=1N=NN(C=1)[C@H1]C2CC3=CC(OC)=C(OC)C(OC)=C3C4=CC=C(C(=O)C=C24)NC)=O	0.61352	0.61602	0.614458	0.616994	0.614313	0.61519	0.615433	0.616257	0.615044	0.615044	0.612698	0.615773	0.613065	0.614511	0.614268	0.612167	0.617424	0.612863	0.616015	0.616846	0.614178	0.611613	0.617573	0.602749	0.60892	0.614895	0.618655	0.619469	0.629235	0.619138	0.62263	0.592663	0.617269	0.619658	0.621046	0.63813	0.61806	0.621803	0.667318	0.656949	0.661609	0.701521	0.71243	0.711906	0.720275	0.730479	0.715174	0.716233
422	CC(C)(C)OC(=O)NCCC(NCC=1N=NN(C=1)[C@H1]2CCC3=CC(OC)=C(OC)C(OC)=C3C4=CC=C(C(C=C24)=O)N)C=O	0.617021	0.618454	0.619938	0.623441	0.619788	0.622665	0.620883	0.622677	0.620497	0.620497	0.622264	0.620198	0.624535	0.625	0.624767	0.620711	0.625855	0.624378	0.622443	0.621269	0.622607	0.610095	0.618959	0.612758	0.606443	0.61433	0.614002	0.614815	0.627379	0.619491	0.623916	0.594544	0.627415	0.627781	0.629119	0.635175	0.625225	0.629874	0.655063	0.648845	0.651476	0.888966	0.90101	0.898658	0.933103	0.911323	0.906441	0.902965
423	CNCCC1=CC=C(C=C1)NC(=O)N[C@H1]2CCC3=CC(OC)=C(OC)C(OC)=C3C4=CC=C(C(C=C24)=O)NC=O	0.771513	0.767305	0.765051	0.764103	0.76337	0.762985	0.763158	0.758345	0.7626	0.7626	0.765832	0.761835	0.754158	0.762947	0.764061	0.763583	0.76	0.762217	0.760727	0.781966	0.757773	0.808135	0.781135	0.743764	0.808166	0.798048	0.797761	0.793921	0.772563	0.784763	0.781778	0.750921	0.757384	0.758403	0.753301	0.741144	0.746695	0.744637	0.895768	0.856452	0.824252	0.687459	0.674315	0.671746	0.680851	0.682376	0.673704	0.67282
424	N=NN([C@@H1]1C=2C(C3=C(C(OC)=C(OC)C=C3CC1)OC)=CC=C(NC)CC=2)OC(O)=O	0.469244	0.471963	0.472579	0.474052	0.472611	0.474359	0.473807	0.476771	0.474389	0.474389	0.472515	0.48133	0.483683	0.4793	0.478134	0.473131	0.478463	0.476135	0.47561	0.474942	0.487464	0.472933	0.475858	0.450687	0.471079	0.485529	0.488523	0.49061	0.498836	0.489124	0.49092	0.46393	0.499141	0.50257	0.505983	0.513575	0.501999	0.503986	0.487405	0.461678	0.476641	0.519977	0.537213	0.538849	0.538939	0.53664	0.538808	0.538634
425	N1=NN[C@@H1]2CCC3=C(C(OC)=C(OC)C=C3CC2=CC(OC)=C(OC)COC)CN1	0.446713	0.449746	0.450445	0.451142	0.451429	0.45149	0.450918	0.45512	0.450633	0.450633	0.452168	0.457197	0.462563	0.461489	0.459288	0.451941	0.459683	0.456218	0.45202	0.452124	0.45283	0.447539	0.453165	0.434383	0.446394	0.453035	0.454545	0.455985	0.460576	0.458015	0.461002	0.444587	0.458001	0.458206	0.461071	0.472189	0.470154	0.472393	0.450758	0.429227	0.436028	0.453782	0.462077	0.465578	0.468399	0.465212	0.462485	0.465225
426	O=CC=CC=CC(NCC1=CN(N=N1)[C@H1]C2CC3=CC(OC)=C(OC)C(OC)=C3C4=CC=C(C(=O)C=C24)NC)=O	0.620466	0.619845	0.618252	0.621865	0.6181	0.620026	0.619231	0.619017	0.618834	0.618834	0.620645	0.621639	0.620932	0.622436	0.623235	0.62009	0.625401	0.619718	0.621881	0.624839	0.623087	0.619672	0.624519	0.609707	0.619079	0.619755	0.623552	0.624359	0.631111	0.624036	0.626521	0.599229	0.617957	0.62037	0.621771	0.637032	0.621755	0.624538	0.678595	0.667357	0.678571	0.714194	0.723899	0.723338	0.740883	0.724794	0.725664	0.729968
427	CNCC(C1=CC=C(C=C1)NC(=O)N[C@@H1]2C3=CC(C(NC)=CC=C3C4=C(C(OC)=C(OC)C=C4CC2)OC)=O)OC	0.754158	0.750179	0.748031	0.747143	0.746429	0.747323	0.747504	0.741684	0.746971	0.746971	0.751258	0.747511	0.741343	0.75107	0.752143	0.750359	0.748222	0.747863	0.746449	0.764409	0.744876	0.793258	0.763649	0.725533	0.793233	0.785033	0.784829	0.782451	0.774377	0.776087	0.774496	0.734195	0.743643	0.744695	0.742177	0.742109	0.738063	0.737271	0.871287	0.830986	0.807635	0.688031	0.677155	0.674608	0.68257	0.68515	0.676563	0.674623
428	CNCC1C=C2[C@H1](CCC3=C(C(OC)=C(OC)C(=C3)OC)C2=CC=C1)NCOC(C4=CC=CC=C4)=O	0.453787	0.456599	0.458111	0.460487	0.45816	0.460808	0.461128	0.465047	0.461721	0.461721	0.457143	0.461812	0.465956	0.466706	0.465517	0.457788	0.462404	0.460036	0.460402	0.461401	0.473278	0.457299	0.457177	0.431087	0.455373	0.468468	0.469815	0.47199	0.493739	0.473968	0.47673	0.445769	0.475116	0.476081	0.478736	0.504619	0.483198	0.485269	0.463545	0.435897	0.451555	0.500579	0.515855	0.517534	0.517419	0.514253	0.517359	0.51728
429	N=NN([C@H1]1CCC2=C(C(OC)=C(OC)C(=C2)OC)C3=CC=C(NC)C(C=C13)=O)COC4CC=CC=C4O	0.722638	0.722598	0.72181	0.72451	0.72035	0.723533	0.720242	0.72185	0.719758	0.719758	0.723577	0.721477	0.721553	0.722446	0.723419	0.721622	0.724462	0.720618	0.720509	0.724208	0.726055	0.72077	0.718981	0.692892	0.721685	0.718053	0.715917	0.712951	0.712311	0.713999	0.714	0.691482	0.711974	0.708682	0.705431	0.714467	0.713548	0.71401	0.792453	0.766234	0.753301	0.681676	0.678571	0.67814	0.683792	0.684211	0.681071	0.676133
431	C1=C2C(C3=CC=C(CC=C3[C@@H1](N4C=C(N=N4)CNC(=O)C(Cl)Cl)C1)ONC=C)(C(=C2OC)OC)OC	0.460011	0.461792	0.463187	0.465385	0.464835	0.466484	0.465971	0.471201	0.46652	0.46652	0.459088	0.465791	0.471233	0.463895	0.463602	0.459682	0.466338	0.465753	0.467689	0.467839	0.473973	0.450361	0.468716	0.431121	0.447778	0.462259	0.467547	0.47117	0.489572	0.470556	0.473915	0.455801	0.493232	0.498107	0.50216	0.5208	0.495948	0.498652	0.466594	0.427536	0.453142	0.517055	0.549946	0.552335	0.545847	0.541151	0.548196	0.546331
432	C12=C3C(CC([C@@H1](NCC4=CC=C(C)C=C4CCC1)C2)NN=NC=C(NC)C=O)=C=C(C(=C3)OC)OCOCC	0.424938	0.428837	0.430427	0.428483	0.432282	0.430598	0.435374	0.432432	0.435993	0.435993	0.428483	0.429098	0.431637	0.434032	0.434568	0.43096	0.435882	0.43165	0.431204	0.432099	0.434703	0.412976	0.429625	0.400759	0.411765	0.422222	0.422959	0.420988	0.437082	0.433333	0.435424	0.418374	0.446246	0.447368	0.445898	0.456856	0.447636	0.449881	0.414338	0.383605	0.400735	0.415704	0.439274	0.44186	0.430358	0.42979	0.432218	0.439024
433	C=C1C(C=C(CC[C@@H1]1N2N=NC(=C2)CNC(=O)OCCC)CC=C(C(OC)=COC)O)C=CC=C(C=O)NC	0.335878	0.336709	0.338393	0.339229	0.339444	0.34134	0.340063	0.345306	0.340694	0.340694	0.337984	0.341095	0.342122	0.342371	0.342803	0.337128	0.341724	0.34174	0.338983	0.342821	0.344417	0.332474	0.341525	0.318746	0.331824	0.337778	0.340708	0.342569	0.353529	0.349206	0.350822	0.334185	0.353121	0.355488	0.357013	0.368739	0.362354	0.364081	0.34194	0.31979	0.335678	0.385135	0.407341	0.408408	0.413163	0.409119	0.405797	0.402878
434	C=C1C(C=C(CC[C@@H1]1N2C=C(N=N2)CNC(=O)C3=CC=NC=C3)C=CC(OC)=COC)OC=CC=C(C=O)NC	0.394802	0.397041	0.398644	0.398524	0.399631	0.399754	0.400123	0.402574	0.400738	0.400738	0.398394	0.411365	0.405273	0.402334	0.403692	0.397412	0.404177	0.400859	0.402207	0.396933	0.410068	0.387016	0.398897	0.375316	0.386591	0.394818	0.396562	0.398165	0.416107	0.405055	0.406384	0.390819	0.414474	0.416567	0.418646	0.435685	0.420203	0.420833	0.394143	0.369551	0.392303	0.431373	0.453644	0.455446	0.459858	0.45583	0.453162	0.450844
435	O(C=CC=CC1=C(OC)C(OC)=C(OC)C=C1CC[C@H1](C=CCCOCC2=CC=CC=C2)OCC)ONC	0.39729	0.398864	0.399717	0.400566	0.398868	0.40099	0.399435	0.401265	0.400141	0.400141	0.393489	0.396491	0.399439	0.395088	0.395643	0.394346	0.393282	0.394386	0.393007	0.397743	0.407876	0.399419	0.395088	0.392142	0.4	0.398293	0.396333	0.396213	0.404993	0.405099	0.406624	0.390714	0.38833	0.387075	0.388594	0.395669	0.395708	0.396529	0.396491	0.392565	0.390435	0.387139	0.385003	0.385292	0.390805	0.392834	0.391221	0.387382
438	O(C=CC=CC1=C(OC)C(OC)=C(OC)C=C1CC[C@H1](C=CCCOCC2=CC=CC=C2)OSC=O)NC	0.404407	0.405941	0.40678	0.406624	0.40592	0.408034	0.40647	0.408263	0.407173	0.407173	0.400564	0.403497	0.406425	0.401118	0.401679	0.401408	0.399303	0.402379	0.399025	0.404779	0.416842	0.407676	0.401118	0.397493	0.407273	0.407381	0.405348	0.405178	0.409938	0.413136	0.413624	0.394886	0.395987	0.394684	0.396164	0.398565	0.402406	0.402261	0.405462	0.40416	0.40257	0.397377	0.393958	0.394225	0.39898	0.402813	0.400254	0.395466
439	O=C(OC)OCC1=CN(N=N1)[C@H1]2CCC3=CC(OC)=C(OC)C(OC)=C3C4=CC=C(NC)C(=O)C=C24	0.620952	0.622391	0.62082	0.625395	0.620668	0.621537	0.622796	0.623588	0.622404	0.622404	0.622152	0.619048	0.622417	0.624921	0.624685	0.620581	0.623744	0.62225	0.626415	0.625237	0.625548	0.617062	0.622879	0.617801	0.612323	0.624365	0.622951	0.622724	0.631382	0.629583	0.63201	0.598113	0.629358	0.628728	0.628104	0.634234	0.630104	0.63382	0.67466	0.672542	0.671269	0.927402	0.9362	0.93232	0.950739	0.972242	0.942039	0.934211
440	O(C=CC=CC1=C(OC)C(OC)=C(OC)C=C1C2C[C@H1](C=CCC(OCC(C)C)=O)N=C2ON)C	0.459512	0.461588	0.462276	0.464834	0.464194	0.465176	0.466454	0.469726	0.467093	0.467093	0.457508	0.461587	0.462318	0.459391	0.459048	0.45727	0.458518	0.456907	0.457306	0.46301	0.473885	0.467235	0.464036	0.441738	0.466141	0.472527	0.472062	0.475336	0.474149	0.478429	0.479487	0.453668	0.474923	0.474138	0.477887	0.476392	0.481734	0.482121	0.467177	0.444151	0.449647	0.469412	0.479953	0.482616	0.483909	0.480666	0.478698	0.483166
443	O=C(C(C)C)NC(=S)N[C@@H1]1C=2C(C3=C(C(OC)=C(OC)C=C3CC1)OC)=CC=C(NC)C(=O)C=2	0.786415	0.779357	0.777032	0.780015	0.775298	0.776208	0.775056	0.772694	0.774481	0.774481	0.779192	0.773669	0.769684	0.777448	0.777283	0.776866	0.773097	0.774074	0.775148	0.780924	0.768158	0.798921	0.778768	0.759815	0.801704	0.790347	0.786088	0.78497	0.762491	0.781087	0.778107	0.74833	0.752475	0.747368	0.745987	0.737491	0.746667	0.74581	0.888189	0.871206	0.832037	0.686957	0.671584	0.66901	0.677043	0.674223	0.670959	0.670083
445	O=C(OCC)OCC=1N=NN(C=1)[C@H1]2CCC3=CC(OC)=C(OC)C(OC)=C3C4=CC=C(NC)C(=O)C=C24	0.61962	0.621059	0.619497	0.624055	0.619347	0.621231	0.621469	0.622264	0.621079	0.621079	0.62082	0.617739	0.621099	0.623588	0.623352	0.619257	0.623434	0.620927	0.625078	0.623899	0.625234	0.615729	0.621554	0.616438	0.611004	0.623023	0.621622	0.621402	0.63207	0.629256	0.632704	0.596865	0.628049	0.627427	0.626812	0.634892	0.629787	0.634487	0.673127	0.670946	0.669725	0.923459	0.93232	0.928473	0.946741	0.968108	0.939457	0.930345
446	O=C(OCC)CN(CCO)C(=S)N[C@H1]1CCC2=CC(OC)=C(OC)C(OC)=C2C3=CC=C(NC)C(=O)C=C13	0.760665	0.75664	0.754474	0.753571	0.752857	0.753747	0.753923	0.748054	0.753386	0.753386	0.756466	0.752665	0.747703	0.754986	0.754811	0.754298	0.754623	0.751778	0.754087	0.755714	0.75	0.764317	0.753737	0.733432	0.765487	0.764451	0.761836	0.762143	0.74234	0.754636	0.754436	0.724555	0.737884	0.733062	0.732974	0.72842	0.735913	0.736308	0.844428	0.825175	0.79822	0.684005	0.670206	0.668742	0.676563	0.672762	0.669592	0.667706
449	CC(C)CNCC1=CN(N=N1)[C@H1]2CCC3=CC(OC)=C(OC)C(OC)=C3C4=CC=C(C(C=C24)=O)NC=O	0.626037	0.626429	0.624842	0.631512	0.624684	0.626582	0.626818	0.627599	0.626422	0.626422	0.627226	0.625079	0.628463	0.629981	0.629747	0.625635	0.628788	0.626263	0.629419	0.630311	0.62956	0.619048	0.624842	0.619829	0.615335	0.624285	0.623894	0.624685	0.630299	0.628481	0.629887	0.6	0.63229	0.632641	0.632988	0.633193	0.629042	0.631771	0.677944	0.67597	0.676801	0.930714	0.940808	0.936893	0.976429	0.95339	0.946704	0.941504
452	CC(C)CNCC1=CN(N=N1)[C@H1]2CCC3=CC(OC)=C(OC)C(OC)=C3C4=CC=C(NC)C(=O)C=C24	0.629416	0.629795	0.628189	0.63491	0.628025	0.629936	0.630172	0.630945	0.629771	0.629771	0.630602	0.626346	0.631812	0.633355	0.633121	0.628991	0.632147	0.629606	0.632783	0.633695	0.632911	0.622409	0.628173	0.624339	0.618677	0.626598	0.625159	0.625949	0.632602	0.630808	0.632213	0.603175	0.635578	0.634911	0.635251	0.636419	0.63229	0.635028	0.681729	0.68107	0.680639	0.938085	0.94807	0.944095	0.984161	0.959459	0.954064	0.948772
454	C(=CN(C(=O)OCC)N[C@@H1]1CC=2)(C3=C(C(OC)=C(OC)C=C3CC1)OC)CC=C(NC)C(C=2)=O	0.458996	0.461867	0.462523	0.463177	0.462568	0.464394	0.46472	0.466061	0.465328	0.465328	0.459756	0.463636	0.46966	0.464199	0.462985	0.461304	0.464242	0.464481	0.463075	0.462333	0.471801	0.461778	0.465088	0.444793	0.460723	0.47048	0.470948	0.473171	0.480072	0.473394	0.473524	0.455215	0.486889	0.488717	0.491415	0.490654	0.480213	0.480588	0.468978	0.445283	0.45941	0.490898	0.504877	0.505727	0.505495	0.505787	0.506344	0.510651
456	COCNCC1=CN(N=N1)[C@H1]2CCC3=CC(OC)=C(OC)C(OC)=C3C4=CC=C(C(C=C42)=O)NC=O	0.621501	0.621913	0.620341	0.624921	0.620189	0.621059	0.62232	0.621079	0.621928	0.621928	0.623731	0.622642	0.626021	0.626498	0.626263	0.622152	0.625315	0.622796	0.625945	0.62579	0.625078	0.614496	0.620365	0.616241	0.61079	0.619772	0.620429	0.620213	0.626866	0.623975	0.625393	0.595597	0.627907	0.629268	0.628641	0.630852	0.626675	0.629405	0.673152	0.672098	0.670836	0.93005	0.940153	0.936244	0.975732	0.955477	0.947405	0.940849
457	C(=NC=C(NC)CC(=O)N)CC1=CN(N=N1)[C@H1]CCC2=CC(OC)=C(OC)C(OC)=C2C=CC=C(C)CNC=O	0.415894	0.417271	0.418038	0.419737	0.418146	0.421053	0.419567	0.42212	0.420223	0.420223	0.410374	0.415796	0.415745	0.414491	0.415033	0.411148	0.413681	0.409239	0.410656	0.417979	0.429227	0.421053	0.41634	0.405055	0.41977	0.42053	0.420395	0.422951	0.429034	0.427723	0.42998	0.407015	0.419823	0.421119	0.424185	0.430521	0.424071	0.426508	0.424163	0.411279	0.41517	0.476497	0.507292	0.507274	0.496508	0.498728	0.496521	0.511761
458	C(=C1N(C(=O)OCC)N12)CCC3=C(C(OC)=C(OC)C(OC)=C3)C4=CC=C(NC)C(C=C24)=O	0.583636	0.586103	0.585645	0.586145	0.584588	0.587349	0.586643	0.586579	0.58629	0.58629	0.585852	0.587035	0.586475	0.588695	0.589404	0.585395	0.586683	0.589049	0.592058	0.592749	0.595195	0.575702	0.58774	0.572671	0.572127	0.582126	0.581982	0.583832	0.587678	0.583433	0.583981	0.565924	0.596717	0.597198	0.599534	0.601036	0.59848	0.599301	0.619106	0.606484	0.623206	0.633038	0.642857	0.643473	0.643645	0.639259	0.644097	0.643433
460	N(C(C)C)C(NCC1=CN(N=N1)[C@H1]2CCC3=CC(OC)=C(OC)C(OC)=C3C4=CC=C(NC)C(=O)C=C24)=O	0.620733	0.622166	0.620603	0.625157	0.620452	0.621317	0.622571	0.621335	0.62218	0.62218	0.621928	0.61985	0.623206	0.624687	0.624451	0.620365	0.625548	0.622028	0.62414	0.625	0.626326	0.614796	0.621639	0.614434	0.611111	0.622082	0.62069	0.620474	0.626082	0.623197	0.62461	0.596996	0.632093	0.631451	0.630816	0.632019	0.627879	0.630593	0.672036	0.667564	0.668627	0.920198	0.933103	0.929258	0.965395	0.942737	0.9362	0.933793
461	N(C)C1=CC=C2C3=C(OC)C(OC)=C(OC)C=C3CC[C@@H1](C2=CC1=O)NC(C(=O)O)CCON=CCF	0.791759	0.800589	0.799559	0.798535	0.797802	0.797366	0.797515	0.793755	0.796932	0.796932	0.769175	0.757662	0.761396	0.770115	0.76995	0.768231	0.767192	0.765591	0.765379	0.79024	0.775072	0.801349	0.784214	0.733432	0.801354	0.796909	0.791393	0.790276	0.77321	0.781318	0.78098	0.754526	0.763158	0.758076	0.756664	0.74347	0.756181	0.756498	0.881007	0.825175	0.796887	0.693918	0.680704	0.680251	0.68615	0.684444	0.679067	0.68239
462	N(C(C(C)C)=O)C1=CN(N=N1)[C@H1]2CCC3=C(C(OC)=C(OC)C(OC)=C3)C4=CC=C(NC)C(=O)C=C24	0.617517	0.619975	0.618421	0.625	0.619286	0.62015	0.621402	0.623206	0.622028	0.622028	0.620755	0.618692	0.620025	0.623515	0.622264	0.619197	0.62336	0.620862	0.623985	0.623824	0.620112	0.609524	0.618454	0.612192	0.60687	0.614806	0.614473	0.615289	0.62693	0.617978	0.619403	0.593886	0.624015	0.622437	0.623798	0.637725	0.625756	0.627486	0.666453	0.662869	0.660819	0.918252	0.879437	0.87717	0.886256	0.890699	0.887238	0.877592
[truncated: 1,011 more rows]
[truncated: 70 more columns]

## Sheet: File 41
	SMILES	SYBA score	A549 [nM]	BALB/3T3 [nM]	LoVo [nM]	LoVo/DX [nM]	MCF-7 [nM]
[truncated: 335 more rows]

## Sheet: File 45
	AI_generated_SMILES	CID	PUBCHEM_SMILES
[truncated: 1,356 more rows]

## Sheet: File 47
	SMILES	CID	PUBCHEM_SMILES
[truncated: 335 more rows]

[truncated: 22 more sheets: File 52, File 54, File 56, File 57, File 58, File 59, File 60, File 61, File 62, File 63, File 64, File 65, File 66, File 67, File 68, File 69, File 70, A549_models_quality, BALB_3T3_models_quality, LoVo_models_quality …]
